# Supplementary material for: Novel Insights into the circRNA-Modulated Developmental Mechanism of Western Honey Bee Larval Guts
Source: MDPI journal article supplement (doi:10.3390/insects14110897), 2023-11-20
Supplement: s1 [file s1]

**Table S1.** The sequences of the identified circRNA in the *A. m. ligustica* worker 4-, 5-, and 6-day-old larval guts.

>novel\_circ\_000001

ACAATTGTATTATAAATTTGATCATTGCTAATTCATGATCCTGGGGATCTTAATTCTATTC  
GAATAATAAGTCTCATTGATGATCCTAGTATTCCAGATCATAAAGCTAGAATAATATACA  
AGATCCCAATATTTTTATGATTGGTTGATATGAATCACTTTATTATT

>novel\_circ\_000002

GGAATACTAGGATCATCAATGAGACTTATTATTCGAATAGAATTAAGATCCCCAGGATCA  
TGAATTAGCAATGATCAAATTTATAATAACAATTGTTACTAGTCATGCATTCCCTAATAATTT  
TTTTTATAGTTATACCATTTTTTAATTGGAGGATTTGGAAATTGGCTTATTCCTT

>novel\_circ\_000003

GTGAAGAATGATATAAATATGCTGATAATGGTGGATATACTGTTTCATCCAGTTCCTGGTC  
TTGGATAAAATAAATTTCTTAATAAAAAGTATAAATAATGAGGGAGGAAGTAATCAAAAT  
CTAATATTATTTATTCGGGGGAATGCTATATCAGG

>novel\_circ\_000004

GAGCCGGAAGCGGCACTGGTGGCAGTGGAGGCAGCAATGGCGCGGCAAACGGTGCT  
GGAGGTGGTGGTTGCGGCACATCGACAGCCCTCGAGAGTAGCGGCAGCAATTATACCG  
GTGGCGGTGGTGCCGGTACCGGTGGTGGAGGAGGAACGGGTGGCGGCGGTGGTGCG  
GGTGCCGCTGGCGGTAGTGGGCCCACCGCAGGGAATGCCTCTGCTGGTGGTGGCGGT  
AGCGGTAGTGGTGCGGCCAGCGGTGCAAGTGGCGGCGGATCCGCTACGGTAAGCGGC  
AATGTCGCGATACCAACTACCACCTACTCATTACCAACTGGTACCCTCTGTCATCCCGG  
ATTGGGTCAGGTCGGGGTTGGTGTCGTGACCGGCTCGATACCGTGTCCGTCCGAATTC  
CCCGATACCAAGGACATCATCATAAGAAGAACTCTGTCCGGTCTGCGGCGACAAAGTTT  
CCGGATACCATACGGGCTACTCACTTGTGAATCCTGCAAAGGTTTCTTCAAACGCACC  
GTCCAAAACAAAAGGTCTACACGTGCGTCGCCGAGAGGTCCTGTACATTGACAAA  
ACGCAAAGAAAGCGGTGTCCCTACTGCCGTTTTTCAGAAGTGCCTCGAAGTCGGCATGA  
AGCTTGAGG

>novel\_circ\_000006

CTCATGTGCAAAATGGCGCCCCTCATTGGCAAAGAGATGACGGAAAAGATTTTTCTGG  
ATAGATACATCGCTCTCTGCAAAGACAAAGAATTTTATACGAGAAAAATCTGCGCGTCG  
CACTTTGGCAAACCTTTGCTCCGCTGTTGGGAGGAAGACGCTTTTCCGAAAATTGTTCC  
CGGTATTTGTGATCTGTGTTGCGATACAGTGTGGGGCGTCCGAAAAGCGTGCGTGGA  
CGTTATGATGCCGGTTTCGTGCTGCATGACCCTTCAACATCGTCGATTACTCTTGGCAGA  
TCTTCTTGCCACGCATCTTAACGACGACTCGAAATGGGTGCGAATGTCTGCCTTTCAA  
TTTTAGGACCATTTATATCTACGTTTCGCGAAACAGTTTACCGAAGTGAATTATAATCAAC  
ACGGTGAATTAGTATTTACCAGCCAACAAGATACTCGTTTCAGTATAAGGTATTTGTACG  
AAGGAATATTCCCCACTAAGTGCGCGATACGGAGTCATACACTCGACGCGGAGGATAAT  
AATTCTAAGGATAACTTCAATTTATCTGTGATAATACAAAAACCAATTTTCGAAGAAGA  
CGATGACGAGGACGAGTCTCAGGAAGATCATATTTCCAGAATGAGAGCTTATAAATCG  
AAG

ACACGCAAGTTCGGTTGGACCTGGTGGAGCATATACCTCATGTGGCGACGATCTGCCA  
AGAATCTCCTCATCTATTCGACAATGTCGTTACGATCATTTGCTCGGTATCATTATCAA  
TATCTACAGGATCAAGATAACCAGGTACGAATGACAGCCCAGACAGCGGTGTAAACGT  
TAACGAAGAAGGGAGTTCTCGACAACATCACGATCGAGGTCAAACGTGTGTCCCGTAAT  
AGAAACCCTCTGTAGGTCCGTCGATTTCTTAGCTCTGGCATCTCC

ACAAAGAATCGGAAGGATGTTGGTCGAGGTATTTTCGCACTGCTGCAAACAATGGAACG  
AAACTTAACGTGAATGAAGTGATGCAATCGGTGCAACAGATTGTCGAAGATCCTGACA  
CGCAAGTTCGGTTGGACCTGGTGGAGCATATACCTCATGTGGCGACGATCTGCCAAGA  
ATCTCCTCATCTATTTCGACAATGTCGTTACGATCATTGTGCTCGGTATCATTATCAAATAT  
CTACAGGATCAAGATAACCAGGTACGAATGACAGCCCAGACAGCGGTGTTAACGTAA  
CGAAGAAGGGAGTTCTCGACAACATCACGATCGAGGTCAAACGTGTGTCCCGTAATAGA  
AACCCTCTGTAGGTCCGTCGATTTCTTCTAGCTCTGGCATCTCC

GTAAGTCGAATCGAGCTACTATCCATCCACTGTTGCGAGCGATCGTTTCCGGTAAGTGT  
GTTTCCCTTACCGATCATCATTCGCCTCGTTCGATCCGAACGCGTTTTTCCACGAACG  
AGAAAGAAGAAAAATGAAGAGAGAGAGAGAGAGAAGAGAGGAGGATACGTAAAAG  
AGACGACATTCGTGGACGGAGATTTCTGGGACGGTTGCGGTTCTCGTAGTCGCGCGCGT  
TCGGCCCCGACAAGGAAGCGAAGAAGCCTACGACGCAGTTGCTCCCGCG

TGACAACGGCTGGAACGACACGTGGATACGCGAAGAAATCTTGGGGTTACTTTGTGCG  
ATTAAAAAGCAATGGAGATTGATGAAGTCGACGACGATGATGTTGATTATAATCTGAGT  
CCCGACGCTTCCGGAACGATATTTGCAATATTGGAGCAAGTGGCGACGAAGGTGGAA  
AGGACGAACTGCTACTGAAATTGCAACAGTACGTAACCTCGGACGCAAACCTTCACACG

CGGCAGGGGATTGGAGCAAGGTGGGAAAATCCGTGGAAACGGGTCGTGATGGTCAAC  
GATGCCGCACGTCTCATGGATGTAATTGGACGTTTCCGGTCGAACGAAGGAAAATAA  
CGACGAGGACGACTTGGACGTAGTCGAATATCGGGGGAAATCGCGAATGATCGTCGAA  
TGACGAGCGGTGAAAAACGGCTCGGTCGGAGATAAGTGTTGATCCCCGGTGCAAA  
TATGACCGACAGGATTACGTAGTGGCGCGTGGCGTGTGACACCAACTGACACGGGACT  
TCCAAGTGCGTCCTCTTCGATTTTCGTTGCTTTCGGAAGCTGGATATATCGAGGAGATAG  
CATTATCGGTCGCGGGACATATATCGCAGGCATGTGAGACGCGGGAATTCGGGTCGTC  
GACTCGACGTGGAATCAGCTGACATCGACTCGGCGTGAGGCGAGCCGACGTGTTTCA  
GAAGAAGAGAAGACGAGAAGAGAGGGAGAGAGAGAGAGAGGGAGGGGGGGATAGATC  
GAGAAAGATGGAAGCAAGGAGATTCGTGTTGGGAAGCGCTATCCTCGGACTTTTTTGG  
AGCGGATTGTTCAAGGGTGCCCTGACCAATTCGATGAACAGATGCGACTATCCTCCCTG  
CTCCTGCGATTCTCACGGCAGGCTGACCTGCGACTGTAAAGAGGAAGGAGAGAGGTG  
GAAAAGATATTCGCGGACGTATATTTTGAGGAGAACTCGTTCTCGAGGGGAAAACCTTA

GCTAACAACGAGGACAAAGGGGGAGGAGAAGGAGGAGAGGAAGGTGGCAAAGGAG  
GCGAAGAAGAAGAAAGGGGAAAAAAACGAGGAGAAAAAGAGGCTGAAAGTTCTAT  
AACGTATAGCGAGTTCTGCCGTGGATTTCGCATAATACAGCCGGCATTTCACGAACACG  
CTCAGCCAATTTGTGCGCGCCGTCAACTCGTGACTACGAATATATCGAGAGAGACTGGA  
CGTCTTTCCCTCCTTCTCCGTTCCCCAGCAAAGTTCGAACCCTACGCTCTCCCTTCCCC  
CCCCTTATCCCTCTTTTCCATTCTCGACGAGGATTTCATCCAAGTTTCTTATTCCGATCTA  
TTATCCGCTTCGTGGCAACGAGACGACGCCGCTTGGCAATACGTAAAAATCATTACGTC  
TGC GCGCTTATTTACGGAAGAGAAAAATAAAAAAAGGGAGAGAAAGAAAGGAAAG  
AAAATTTCTATCTACTTTTTCTTCTTCCCTCTTATCCCGATACGCGCGAATATTTATTTCTC  
CTCCCCGTTTCGAAACAGCTGCGTTTTCCACCACCCTATTCTCCGAGGCAAACGTTTTCG  
ATGCCGAACAGTCAACGCAGAGAGCAAAGTTGTCAAGCGCGCCGGCATCCCTTGAAT  
AATTGACGTCACCCTTGAATAATTGAGCAAACCTTTTAGCGGATACAGCCTTAAACCCG  
GCTCAGTTTCCCGTAACGAGAGACGCAGGAAGGAAGGCAAAGGGGAAGAAAAAAA  
TACGGAATAGGGAACGCGGTTTGGACCTGCCAAAGTGCAACGGCGATATCGCCACGC  
CTAGAAAATTAGTTACGGATAAATACGTTAATCGACTCGTTCGCATCTTATTTCTGTTCTGT  
TTCACCGATCGCTTTCCACGCTCGAGTACTTTTCTTTATATATGGAAAAATGCACGTGGA  
ACGAGTCTCTTTTCCATCGACGTGTATTTCACGCGTTAAAAAGAGGGATTGGGAGAGT  
AAACGACGGATAAAATTCCTCTTCTTACGTTACCAATACTCGTCTCTGATCGATGCGC  
ATTCTGATTAATAATTACGCTATATCGAGGAATATTAAGAGTATAACGCGTCGTATCAA  
CGCGAATCCATCCGTCGTTCCATACTACGAATCAATTGGAAGAAAACCTTCATCACCTC  
CGTTCGAGAATCACGATTCAAAGTCCCAAGTGACGTAGCACGCTCGCCTCTCGTTTTTT  
TCCGTAATTGAAAACGGCGTCCTATCTCGAGAGAGAGAATATATAAAGTTCGAAGAAAT  
AAAACTCGGATTCCCTCCTCTTTGCTCGATGATTTTCGGAAGAGGAATATTCACGATTA  
CGCGATCCGAGTCGAGTGACTCGGACTAAAAACACGTTTCGACGAGAGCAAAAACGAG  
AGAGAGAATGAAGAGGAAAGGAGATAGAGAGAGCATCGGAAGGAAACGAAAACGTT  
GGCTCGATAATCATTGGCGGAACGAGGCGCGTAGACGCGAGGAGACAAGCATTTCGG  
GTGTGGTAATCTTTTCTATGGGCGGGGAGAGAGAGAGAGAGAGATTGTGCGTCGG  
GAATTGACCAAGAACAATGAGACGGGAACAAAGGTCGGGACAGACAGGAAGGGACG  
CGAGGAGGAGAGATCGGTTTCGGGGGCGAGACGACGGTGAAACGCGCGAGCTGGTAC  
CCGAGAAGAAAAAGGGGCACAAAGGTTTCGCTTTTATCGGCCACGCACTACACGTGG  
GCCACACGGTCCCTTCTTTATTCCTCCCCCGCATTACCACGCACGCCCTTCCTTCAC  
GGCTAATCTCGCGTCCAACTCCTTCACGATTCTCATCCCGCCTCTCTATTCTTTATATAA  
CGTCGAGAAAAAAAATTTCTGCTCGAAATTATTTCAACGCGTGCCTCGTTCTGTTCTGT  
TCGTTTATTCTACGCGTAGATCTGTATCGAGAACGACTCGACGCATGGAATAAGGCGCG  
GAGCAACGTCGCATTTTCCACGTATCACTCTCGTTATCGGGTGTTTCGTTAAGAGAGAGA  
GAGGGAGAGAGAAAGAAAACGCGATAACCTCGCGAAACCTCGTATTTGCGCGGACGA  
TATCTCGATCGTGTCTATGGTTGGTAGGAGGCAGGTATGCGGTTGGCATTTCGCCATCGA  
TTGTTTAACAAACAAGGAGCCGCCGAGTGGCATCGCGCGGTCCTCCTCCTCCTCTC  
CTTTCGCTCTTCCTTCTTCGCTCGAGTCTATTAATAAAAAACGGAGCGAGCCTTCCCCA  
ACTTTTCTCCTTTTCTCTTTTCGATTAACGAGCTGTTGCGACAAACAATTTCTTCTCG  
GTTTATCGAAACGTCGGAGAAAGAGACGACCCTTTCACCTTGGACGAGAAAGGCCCT  
TTCGAAAACCTTTCGAAAGAAAAAGAAGAAGAGGAAGAAAGAAAAATGGCGATAATC  
GGGCCGGTTAATAGCTGGAGCTGGTGTAAACCACGGACGGGGACAAAAGGTTGAGCC  
CGCACACGAGCCGGATAGTGGTGAGCAATTGCTCGTCCGTGATCCTGGCCAACTCGAG

CCTCGCCTCGATGGTCGGGCTCCGCGCGATCGACCTGATCAACGTGGCCAACCTGACC  
CTGGTCAGGCAGAGTTTCGAGCTCTCCCCCAAAGCACGCGCACGTGGATATCGGTGA  
GGAAGTGCAGCATCGACACCATGCCAAGTTTCGTGTTCCGGGGGGACGTGGAGGCGA  
TCATCCTGGAGAACGTGAGGATCGGCCAGTTGAGCGCGTTCTCGTTCGCCAATCTCGT  
GCACACGGAGAACTTAGGCTGGAGAATTGCCGCATCGAGAGCATCGAGGCGCAAGC  
GTTCAAGAAGTTCGACGTGGGCCACTTGCGAGTGATCGGTACTAGGTTCCGGGGATCAG  
GTGCCGAGCAGGACGATGAACGACGTGAGGTTTACCACACGTTCATGTTGGACGGTG  
TGAGGATGGGCACGGTGAGGAGCGAGGCGTTTCATCGTGAGAAGCCCGCGGACAGTGG  
CGATACAGAATTGCGTGGTGGAGAGTTTGGAGAGCGAGGCGTTTCGACGTGACCGCGA  
GGGGGCCGGTGATCGTGAGAACAACACTTTCGGCAGCCTCTCCGTAGGCGCCTTCCT  
CGGCGTACGGGCGGACGCCGAAGCGAGGACGCAGCCCTCTCTCCACGACCTTATCTTT  
AAGAATAACAGCGTGGTCAACTTCGAGGAGGGCTCGATCATGTTTCGACCGAAATAGCT  
TTCGCCTCGAGCTCGACAACCTGTTGGTCGGCCGATCGTGCGACTGTGCAATGTTACC  
CGTATGGAAGAACAATATCCTCAACTACACCAATCTCTACGCCAGGTTTTACAAACAAA  
ACACCGCCTCCTCCTCCTCCTCCTCTTTTCTTCCTCCTCCTCCCTTTTGCTACCAGTCC  
TCGTATCGAGCCAAGACACCCCGATCAACGAAACCCCGGAGACGTTCTCTGCTACGA  
CGGCGAGACGTGCAACGGCGTGGCGATCAGTTTCGTGAGTACGAGACGCGACATTG  
CTCCCTCGGCGGTTCCGTGCTGGTGTTTCGTCTCGTCATCGCGGTCTCCTCCTCCTATC  
GATCCTGATCGCCTGCCTGATCGTGTGGTGCTGCAGGAGGCGACGCAGAAACAGCAG  
GAAAAAGTGGATCAGCGTGCCGATGAACGCGCCCCGACGTCGTGTGAAAAAGAACGG  
GGTGATCGGCAGGGAGGCGGCCGCTCGGCCACGCCGGTCGACAGCCGGATAACGAT  
GGTCGTGCCGACGGGAGACTGTACAGGGAGACGGAGTTTCACGTGATCGTGGAGAA  
GGCCGAACCGTTGACCACGGAATTGTAACGAGAAGCGTGGAACGGCTCGACCAGCAG  
GCAGGCTGCCCCGCTCGCCGATGCCTCGAGTCGGCGAGCAACGATACGAGCGGTGCAA  
CGTTTCGAGCCGTTTTTCGCGTCTACGAGCTGTGAACGAATCGATGTAACATTCGACTAA  
GAGCGGACTACTCTCTCTCTCGAAAGAACTCGAGAAAATTTCTCACCCAACGATTATC  
AACTCGCGTTGACGAAGAAACGGAACGGGAGGAGATCTCGGAGCATCTCGAGATCTC  
TCTCTCTCTCTTGTGTTTTCAATTGAATTCTCCTAGTACAAGGCAGTTCGTAAGCTTCCA  
TTTACATATCAAGAACGAGCATCGATTATCCATCCAATCCCCCTTTCCTCCTCTTTTCTTT  
TCGTCTTCTCTCCGCGTGGTCACGTACACTTGTATGTAATCGAAGAGTTTCCTTTTCGTT  
TCTCTTCGAGCAGGTCGCGTGGATGGATAATCGATGCGCGTTGTTAGTTAAGTTAAGT  
TAAGCGTTAGTTAAGTAGCTTCCAAGAGGGGAAAAAAAAAAGAAGAGGAAAGAGGGC  
CAGTGTCGTTTTCGCGAAGATCGGAGATCGAAGCGATACGAGAGAGGCGACGAAAGAA  
GAGGCGAGTACAAAGGGGAGTGATCGAACTGATAACGGACTCGGTTGACGTCGCGT  
TCGAGATTTTCTTATCGGCGATGATCCGTGCAACAAGCGTCGGGAAAATGCGATGATCG  
CACGTTTCGATCGGAAACCAGCGTGCCATTCTTCCTCAGTGTAGCCATTCGCTTCCGTTT  
GGAAAAATGGGGGCGAGCGAAAGACGAAGCGCCGAATTACTCGTCGAAGAAAATTGT  
TCGAAGCGAAAATTGTTCACTCCCTACACCGAGAATCCCTGTATTATATATCCCTCCTTC  
TGATCGCGTTTCTAATCGTGCTTGTAACACAATAAAAAAAAAAACAGACATATTACCT  
GACACCCCTTGACAATACGAGATAAGAGGAATAACGAAGAATATATCTGCGAAATTATT  
ATTACCGAGCGAGTGGAGAAGGATGATGAACGATAACGTAGAGAAGACTTCTTGTAACA  
CGAATCCATACGAAATGAAACGTATCCACGTTACACGCAAAATTTGTATTCCGTTCCCG  
AACCCGTTTCGTGAGCGTGACAACAACCTCGCGACACCCTTCTCGAGTGTTTCAAAAACCT  
CTTTTCTCCTTTAATTTATTGTATTATTTACCACGATTATTTTCATGTTTATTATGAGCTCT

GGACTATTGCCTATAATAAATTGTTGTTACTGTTATCATTCCGATCGGTATCTAATTTTGA  
CAAATGCGCAAACGGGGGATTTTCCCCTCGACGAGGGTAATCGATTGCCACGGGGGA  
AACCTCGTTCGCGTTTACGAATTCGGCCGGTAATCTCGAAAACGGGGGACGGGGAGA  
GGCTTCTCTCTCTCTCTCTCTTTCTCTGTCTATCTTTCGGGGAGTAATACGCGCAATA  
GCGTTTAGCGTAAAACCGCAACCGACTGCCGCCACTCGAGTATCGTTCCGCGCTTTCG  
AGCTGCTTACGGTGATTAATAGACCCGATATAATTCTGTCCTCCTCTCCGTTTCATCAAGG  
TAAGCCATCGAGATATTTTACCCGTCGAACGAACCGACGACGATCCCAGTGAAAGGGA  
AGCTGAAAGGAATTCGAGAAACGAGGAAACGTTGAGCAACAACGAGTATGACGATAG  
ATTCGAAGCTGTTTCTTTTTTTATTTTTTAAAGTACAACGAAGAGAAATACCGACCGCC  
TCGTACTCTCGCGTGTGACCTATCTCGCGCACGTGTTACCCATGCATTATTGATACACC  
CGCCATTTCTCTCCACGCAACGAGTCCCGCGCGGCATCGTTTCGTTTATCCCCCAA  
GAGCGGCGAACAGCGGAGATCGATCCTCCCGAGTTCGTTTCGAGATTGTTCAACGATCT  
TCCCTCCGAACATTTTCATCCGAGGCACGCCCGATTAGAGATCGAGCGTGAAAAAAGT  
GGCGGAAGTGGAAGTGCTGCGATATTCGTCTAACGGAATCTCGCGTGTTCGCGCG  
AGACGCGTCTACGATTATCGTGCGTCGGAAAATTAAGCATTTCTAAGGACGTTTTAGTT  
GTAATTATCGTCAGACTGTGATATAACGACAGCCGATTGTATAATTTATTTTACATCGAA  
AGAGACTTCGTACCGTCGAGATAATAAAAAAAAAAAGATAATAAAGAAGCAAATTGA  
TGCATACAGTACACAACCTGACGACCACTAGATATTCCCGATCGATATTTCCAAAATACC  
ACCTTTTCATACCTTTTCAACCTCCTTGAATAAACCGCCTCTTTTTTCTCCCCCCTTTCC  
TTTACTTAATGAATATGAATACACGCGTGAAAAAGGAAAAAAATTTGCGATATATCG  
TCGCGCGATCGATCATTGCGGTTATTGCGAGTCGCTCGCGCGTAGAAACGTGGAAACG  
TGAAAGCTACCGGGTCTATTAATTCTTGCGGAGCATAATGTACCGATTCATAAACGGTTT  
CAATAACGCGATTATAACCGGGTATGATTCATTTTAAATGAATCTGTTTCGTGATTTGCC  
GTTTAATCGGATCTAATCGAACGTTTCGACGGAATTGAAACGTTGGAGAGGAAATAAC  
GGAAAAATTTTTATCCGTCGTATTAACCAATACTTGGCTGATTGACCAAGTATTCTATTT  
AATCGCGGATAATATTCGTATCGTCGATGAAGATCGACCACTCCATTTCAACCTTCAGTT  
CTCGCGACGAGCTCGAGCTCTCAAGTGTGCGTGTGAAAAAAGGAAACACTTTGCAC  
TCACCTGAACGGAAGAACGCCATCGAGGGCCTGGGAAACTGTAGGGGGTGAAGCTAG  
AGCGAATCCTCGTCCAAGTAAGGTCGAAT

>novel\_circ\_000012

CGGCAGGGGATTGGAGCAAGGTGGGAAAATCCGTGGAAACGGGTCTGTGATGGTCAAC  
GATGCCGCACGTCGTCATGGATGTAATTGGACGTTTCCGGTCGAACGAAGGAAAATAA  
CGACGAGGACGACTTGGACGTAGTCGAATATCGGGGGAAATCGCGAATGATCGTCGAA  
TGACGAGCGGTGAAAAAACGGCTCGGTCGGAGATAAGTGTTGATCCCCGGTGCAAA  
TATGACCGACAGGATTACGTAGTGGCGCGTGGCGTGTGAGACCAACTGACACGGGACT  
TCCAAGTGCGTCTCTTCGATTCGTTGCTTTCGGAAGCTGGATATATCGAGGAGATAG  
CATTATCGGTGCGGGACATATATCGCAGGCATGTCGAGACGCGGGAATTCGGGTCTGTC  
GACTCGACGTGGAATCAGCTGACATCGACTCGGCGTGAGGCGAGCCGACGTGTTCTGA  
GAAGAAGAGAAGACGAGAAGAGAGAGAGAGAGAGAGAGAGAGAGAGAGAGAGAGAGAG  
GAGAAAGATGGAAGCAAGGAGATTCTGTGTTGGGAAGCGCTATCCTCGGACTTTTTTGG  
AGCGGATTGTTCAAGGGTGCCCTGACCAATTCGATGAACAGATGCGACTATCCTCCCTG  
CTCCTGCGATTCTCACGGCAGGCTGACCTGCGACTGTAAAGAGGAAGGAGAG

>novel\_circ\_000013

GTTGCGTATTCGGTACGTGATGCCGGCGGCGCACCTGACGCTGCGCGAGGAGGATGTG  
GTACGACTAACGTTGGAGTTCCTCCACAGCCGAGACCTTCACATCTCGCAGCTCTCGT  
TGGAGCGAGAGACGGGGGTGATAAACGGCCAATACAGCGACGATGTCCTGTTTCTTCG  
CCAGCTGATCCTCGACGGTCAATGGGACGACGTGCTCGAGTTCATCCAGCCGTTGGAG  
GCGCTCCCGGACTTCGACATGAGAAAGTTACCTACTCGATCCTCAGGCACAAGTACG  
TGGAGCTGCTCTGCATCAAGTCCGAGGCGAACTTCATCGCCGCTGGGACGAACGGCA  
GCGTGGACAACGCGGTTCGAGGAGGTGGTCAAGGTTCTGAGCGATCTCGAGAAGGTG  
CCCCGTCCAAGGAGGAGTACAGCAGCTTGTGCCTGCTGTTGACCCTTCCTCGGCTCAC  
CGACCACCTCCAGTACAAGGATTGGAATCCGAGCAACGCCAGGGTTCAGTGCTTCAGG  
GAGGTGCACCCGTTGGTGGAGAAGTTTCTGCCCAGGGACAGGAAGAGCACCGATCCG  
GCTCACCCGGTCACCTCCGCGAAAAACGATCGGCTGATACAGCTGATAATCAAGGGGA  
TTTTGTACGAGTCGTGCGTCAATTACTGCCAGGCCAAAGCTACCGGCTCCAAGGAGAG  
CGAACAAGTGGAATGAATTTCTCCAGGCTGTTGGACGGCTCGGTTCGTTTCAGCGAT  
TCCGACTTGAGCCTACTCTCTTGGCTGCAAAGCATACCGCCCGAGACGTTTCGCGGTGC  
CTTTCGCGCAGCGCACGTTGAACGTGGACGTGGAACGGTTGGAGAGACCGTCGTTGG  
AGACCTCCTGGACCGAGCACATGTTGATCACCCCCATAAAGCCCAAGACTTTCCCGCA  
CAGCGCGATGCCGTTTCAGAGGCCGCGGTCCGCCGCCGACATGATGTCCCGCAGTTTA  
GTGCCGGCATTGGAAGCTGGACTCGGACCAAGGAGTCCCGGGCCTAAAAACACCACG  
ATACCATCCGCGGCGCTAATGGCTCTGTCCACCGGCGATATAAACCCGATGTCGAGATC  
CTCCTTCGCCAGCTTCCATTTGACCGGTTTCAAGAACAACAACTGATGAACACGAGC  
GTGGACAGACTGTTTCGAGAACGAGGGCGACGTCTTCCTCAGCTCGAGCTACGCCGAG  
TTCCAACAACCTGCCTTCCATACAGGAGACCACGGCCAACAATCAGCCGAAGGCTCCTC  
CCAGAACGAGGGGACACTCCAAGAGTCCCGAGACTATCAAAGCCGATCCGTCTGCGG  
CCTCCACGCCGGAGCGTAGAGTCGCCGGCAGAGAATCGCCGGCCCCGTGACCGCCA  
GAAGCTCGAGAAGGGATTCTTGGCGGAGAAGCCAACCGGTGTCGCGGCAAAGATCA  
CGGAGCCAACCCCGATCCCTGTCCGAGCCTCGCTGGGTGGAGATCATCTGGAGCAGAG  
TTACAACGGTGACCTGTTCAAAGAATATCAAAGCAGAAGCAAAGGCTGCAGGAAAA  
GGTTCAGCAGAAGGAAAGGGAGTGGGACGATTTGCTGAGGCAATTGTCCGCTCCGTT  
ACCTGCACAAGTGGTCGATAACAGACTTCAGGGAGACGG

>novel\_circ\_000014

GTCCTCCACTCGCGCAGTTTCCTCGAACGAGCCTCCTCTCGAAGAGAAGGAGGAGGA  
GGAGGAGAGGAGGTCTCCGGCCCCGTTTCGATTTTTTGCCGTGGCTGGGTATGCGGGC  
ACACCTACGTCAAATCGTAAATACATTTATTCATGTTAGGCAGCCGCGAGTATTGTATTC  
CGTCGTGGCCCCGGTGTAGACAATGAAACGGGGGCGTTTTGCCCCGTCCCGCTTGCG  
CCGCCGCATCTCGGCTGAGACGGGACGCGTTTCCAACCATCTCCATCCACTACTCGTG  
AAAAAGAATTTTATTTTCGAGAAGTAGCTTCTTCGGTTTCGCTCTCGCGAATAAAAGAGG  
AAAGGAGCAACAGGGATATACGTGCACATTGTAGACGAACCGGACACCGGTTTGCAC  
GTCGCCTCGCCATTCGTTCTCCTGCTTACGTGCCGATACACGTAACCTCTCCGCAAAGC  
GGGCGGCTGGTTAAAGCTGGCGGCGGACGGACGGCGATTTCGCGCGACAGTTGACGC  
GGTGGTCGATGCGCGCGCATCCTCGCTGCCTCGCGCGGCAGAGAAAGGTGCACCGTG  
CAAGGTTTATGGCCGCGGAGGGATGCGGCGCGTCTGTGGACAGGGATACTTATACGCG  
GTTACTTATACGGGTGGACCGGCGAATAAATATAATGCCTGGCGTGGGCGGCCATTGTT

CGCACGCGTTAAAGTTGAAACGCGAAACAGGCCGACCGTAAATCCAAGATTTCCAAG  
TTAATGGCTCCGCCGTAAGGAAAGGCTCTCCTCTCGCCCGTGAGAACTCTGGGTTTCTT  
GGACGACTTTTTTCGGACGCATTTGCATTTGAACACTTATCGCGCGAATTTTTCCATCTCT  
ACGAAGAGGAGGAAAATGAGAGGAAGGAAAAGACAGGTTGGAGGAACGGAAGAGCC  
GGTTCGACGATGGTTGTACGAATGACCGCGTGAGGATGGATCAGGTGGCGGAAGGAA  
CGAGTTACGAGAAGAGGCGCATCGATCGCCTCGTTGGATGGATGTGCACGGTACACGC  
GTGTTTCGCACGCGAACGGCGGACGACCTCGGGCCGTGTACTTTGCTCGTAACGCACGG  
AACCTGTGCTCCGGGGAGCCCCTTATTACAGATGCGGAATCAATTTCAATTTTCGCGCC  
ACCTGCGATCTCGCCCTATTACCCTTGCAACTGCTTCGCGTCATTCTACGAAGTCCAGC  
TTTCCATATTGGGTATGTAATGCGTTTATTATTAGGATGAATTTGAGACTCTTTAACCCCTC  
GACGGGTACATTATCCGTTCAAATCTATGTAAGTGGAGTTAAATGGAATCTCCTTAAA  
AATTCCTCGTAAGATTTTTATTCTTTCTTTTTTATTTTAAAATTCTATCAGGATGGCTCGT  
AGCCATTGAAATTTTTATGGAGAAAAATTTAAATTGCGCCTTCCCTTACGGAAGGAGGG  
AAATGAAAGGGGGCGAGACGAAGTTGATCGAGGCTCGTGGGTGGCCCCTGGCATCGA  
CGCTACCTGGTAATACTCTTAATCACGGTCGAGCCTTTCACCATCCCGCTTAATAAATGT  
GATTTTGAACGAATACCAGAAGCATCGTGGTCGATGTAATTGCTGGTAGACGTGATATA  
TCTCGTGGAGTATATATTGCGATATCGATGATAGAAGACAAAGACACGCCGAAATTTTT  
CTTCTACAATTCTTATGGTTAATTTGTTTAACTCATTGTTAATCATTGTAATGGAACAAGG  
CTGTTTGACAAGTGGACTATGGCTGGTAATGGATCGAGTTTGGATCGAATATATGATTTT  
TAAATCGATAGACGAGCAATAATGATAATGGTAATGATCAGTCAGATAACGATCGGCGA  
AAACAGAAACAAAACCTGCACGGTCGATATCGGCGAGCAGTATAATAAGGAATGCGTAT  
TTGCTCGTTTTTTTTTTTTTCGGCTACTCGACGAGATATTACGGGCGGTTGCTATCTTC  
CTTCTATTGTTGCGCGTGTCTGATCGTGGCCATATTGAAAAGAAAAGAAAAAAACTCT  
TATTTGCGATATTAACGTCTCGACGACGTATTAATAACATGTAAATGTATTTGTACCGGC  
CACTCGTATTTTCTACAACCATCAATTTTATATCTGATTCCTCGTATCGCGAACGTATTAA  
CCAGTATTCCGTCCAGTGGTATAAATCCTATAATTTCTCGCAAAATCATTTTACAAAATC  
ATTTTCCCGTGTCTCGTGAACCTCTCGCGTTTCTTTCTCCTTTTTTTTCTTCGACGAACTCC  
GTCCGTGTTTGTACGAAAAAATAAATTTGTGTAAAGACATTACAAAATCATAC  
CTCTGCAATTCTTCTATTTTTCTTTTTGTTTTTCTTCTGTTCTCTCCTCTACGCTCGACA  
ACAGCGTAACTTTTGTTGATTCATTTTACCAAGTTCGGTGAAGAGACGAGAGTATCG  
ACGCGGGTAGAATTCCTTTGTACGAGCGAGCATATAAGCGTTTGTGAAATTCAGCCTAA  
CTTTGTTCAAACGTTGCGAACGTTTAGCAAAGTCAGGGGAATGCCTGGTGAACGTGTT  
ACACACGGAGAACGAAACAAATTAATGGTTTTCAAGTTGATTTTCGTGGTGGTTTCGT  
AACGGGGACGTAACGAGCAAACGAGCGTTTCGCGTACGTTTTCAAAAAAAAAAAGAA  
AAGAAAAGAAAAGAAAAATGGTATAAGCAGTTTACAATTGAATCTCTCTCCGGGAACA  
AAAATAATTTGCTTAAGAGGAAAAAAGAGAAAGAAAAATTCGAGATTGCACAATGC  
GATAATTCAACGTGATAATTCGGAATTGAAATCTGAAAGAGAAACTGGGAGAATCGAG  
GGAGGAAAAAATTTCTGCATTTTTCTGCATTATTCGATCGGAAACTGGAACGTTTCTG  
GCCCAACCATTGCCATTATTTTCGATCGATTTTATTAGCATCGTAAGCTGAATGGCCCTATA  
ATTCTATCGTACGAAACGTTTACTAACTATTTACGCGGGTTACCGTTTTTTCCGTGTTA  
CACGAATCCAAAGGTAAGCACCGTTTCGAGCGCGAACAGTAGCGCTGAATTGTTTTCA  
ATCGGTGGACGATTGGCGGAGAAACGGCGGCCCATTAATAATTACCCGCCGCTTTCCCC  
TGGAACACCAGGAAAGCCCGAGGGACAGAAACGGACAGGAGAGCACGTACGATTCC  
GATTGAGCCGATAACGCGAAACGTTTGAATTACCATTCGTCTTTTACGTGTTGCCAAT

CCCTGCGCACGCGGCCGCTCTGCGCAACGCTTTAATTTATCACATCGCATTGTGACTGT  
ACTGGGGTAGTAATTTTCGCGATATAAATCGTTTTCGGCTCTCTCGCGCGCAACGCAATTC  
AGCTCGCAGTTTCGCCAATCGCGAATCCCGATTCTATCGAACGAAATCGGACGAAGAA  
AAAAAAAAGAGAGAAAAAATTTGACTTATAAGGAAAAGAGACACGTGGTGGTTTATCG  
CGGCAAGCATCGCGCGAAAGTTCGATAATTTTACGGTTTACTCATTGAGGAATCGCTCC  
CGTGGAAGAAACAGCGGTGGCAGTCGAGCAGCATTTAAAGAGAAAAGACTTCATTAT  
GCATCTCGGGAACGAGTAACGATCTCGCGTAACGGATACGCTGATTCACCGGTGATCG  
GCCGATTTATTAATCGCCCGAGGCTTCCCTCCCTTCCCTTCCCTTCCCTCCGTAAAAATA  
TACGAAAAGTGTTTCGCGCGGGTGTTATTATTGAGATCGGACTCGTATCGATAAAAGAA  
TCGTGCAATGACTTAAACGTCACGCGAAAATTACGTTTATTTAGGCGGAGATTAAATCC  
CGCTCTCGATTTTGTACTCTCATCTCTTTTAATTAACCTCTCGATCGATGATCTCGTAAAT  
GCATAAAAAGCGCAGCTCTCGATAATCGTGCAAGTAGTGGTGGATAAAAGAGAAGAGT  
TAGGAAAAAGAAGAATAATAGAGCGATAGGAGGAAGAGATGGAATAATTGAAAGAAT  
AAAGGAGAGGGAAGAGAGAGAGAGAGAGAGCGGATGAGTTCCCCCGTGTTGCTGCG  
GACAGGCATGTAGCAGGTAGGTTTCGGGCGAGCGCGCATGTGCGCGTGCCGCGGGTAG  
GCGGTAGCGAGCGCGCATGCGCGACGCGGTTTCATGTAAATCGACCATGCGCAGTGGCG  
TTAGCGGTGGCGCGTTCGTGCTGTTGCAGACCGTACGTGTCGCGGCACGTCCTTGTA  
GGCCACTTGCCCTCCCGTCTAGTGGTGGCGACGCGTGACACTAGCGTTGCGCGAACCG  
TGTCTAAGCGGCGCGATGCATGGTGGCGCGCGCGCGCGTGTGCGTGTGCACACGTGC  
CGTCCAAGTGGCGCTGCGCCGAGGTTTCGCGGCTTTCTCTCTCTCTCTCTCTCTCTC  
TCTCTCGGTGTAATGGTGTGTGCCGCCGCTGTTACCGGGGGACTGACGCAATGCGCC  
GTGTACACGCGTTTGCTCGTAAATCGATTCCGAGGGAACGAACGAGAAGGAAGGGGC  
AAGTCGAGGCAAGAACTGAGCGAGAGCTCGCCTTAAGCAAAACACCTCTCCTAGAA  
GACTAGCTCTGCCTCCCGTAACGACGGGTATTGTGTAATGAATGCTGTTATCGCGACG  
ATCGTTCGCTTCTTCCGTGCAAGGAATTTTCTATTGAAAATTCGGTTCGCCCCGAATTTAA  
GTATAATTAGGGAGGGAAGGCAATGATTTTTCTTTTTTGCAATGTTTGAATCGTATTTTTT  
TTTTTATATAAGATTATATAAAGGAAAGACTCGAGTACGTTACAAATTACGTTCTTTTCGA  
ATCGTAATCGAATTACGAGATAATCTTCCAATTGAACGAAAACACGGGTGTTCGAAATC  
TAACTTTCTCCATCGAGCTCTTATCTCTTCTCCTTCGTTTCGAGCGTAACTCGTTAAAGA  
TTCCTCCCAGGACGAAGAGAGAATCTATCGCATCTTTTTTTTTTTATTTTCCTCTCGCGT  
TTCGTATCGAAGCTAAGCTAGTCTATCCTTTTCGCCTCGTCTCTTTCCTCTTGCGGATAC  
GCTCCTAGCCACAGGCGGGGAACCGAAGAGACTGTCGAAAGTGAAAGGAGCCGAAG  
AAATCAAGATGGATCGTGCGTTTCGTTATAACGCGGCTTTTCTCGCTGCGTGCTGCACGC  
ACCTCCACCTTCCACCTTCTCTTCTTCCACTGGTTCAAGGACTCGCGGCGAGCGTGCC  
AGCGTCGATATATACCCAAGGCATCGATACCATCTCGTGCCGCTCGTGGATGACGAGGT  
GGTCGGGAGAGGGGAGGAGGGGAGAGAGACAGACGAGTCGGCCGTTGTCCCGATC  
AAGTGAACCGTGTTAACGTCAGCCCTGTTAACGGGGAGTCGAATTAGTATCGACGAGG  
GTGAATCGATCGATCCCGTCCCTCCTCTTTTTTTTTCTCTTCCCTCTCTCCTCGTTT  
CCAATTCCAGCTCTCGGCTGTCGAGGGCTTGACCCCGTGACGGCCCTCGGTGCACTT  
GTTGCGAGCCGGTGCCGTTAGAAAATACTGCACCGTTCCGGCAAATGGCGTCCGCGCT  
TTCGGTATTCCGGGGAGAGGTGGAGGAGGAGGAGGAGGAGGAGGAAGGAGGCCTCC  
GCGCCGATTCCGTTATGTTTCTCTTCGTAAACCCTAAACGACGCTTTTTACAACCCGA  
CGTGACGATTTGACCGCTCCTTTTCGCCTTTTCTCGCGTTTCATCTCGGCTTGTTATTAG  
GTTCCCCCGAAACGAAGAGACCGCGCGGTTCTCCTCCATCGGTTAGACTGGTTTCTCG



CGGGGTATGCGAAACGGTCGTTAAGAGAAAGTACGTAGGTGTGTACATATGTGTGTTA  
GTGTGTGTGTGTTTCGTGCGTGCGTGTGTGTGTGTGTATACGCTTGTCCGTAGGATCGTT  
GGATCTTTATAACGCGAAGATCGGAGAATTCCACGTTTCACGTGGCCCTCGCCGACGGT  
ATCTTTACACTCGAACGGAGGATAGAGAGGGACGAGGTGAAAGCAGGAAGCGAGCCA  
CGTACGCTCGGATCCCTCTATTCATCGATCGAACTATTATCCGTTGCTTCATGGTTCAGG  
TATTATGAACTCGTCCATCTTTTTTCTTTTCTTTTTCGCGCGGAATTCCGAACGGAAAAAGA  
AACGAGATAAAAAGTTGCGCTTAGAATTCGTCCAACATTCCCCTTGCTTTGTATCGCCTC  
GCTTCCATCGAACAGGGAGGTTTCCGTCGTGGTTTCAAATTGCGACAGTTCGATTAAAA  
TTTAATCGATCGTTCGCAACTTGGATTATGATAAACCGTTCGGATTCTTGGCAACATTCC  
GACCGGGATGGAATCCATGTGGAGGAAGAACGATCCTCCTCCTTCCCTTCTCCCTCTCC  
TCCCGCGCACAGGTGACCTGAAAATCGCGTCGACCCAGAATGTCGCCGCGTCGTTTT  
TTGTCCCGATCGATTGTATCGGGACGATCTCGCGTCCTCCGTTCCGTTCGAAAACGCGT  
GGGACGGGGTCCGCGGCAGGCGTGTTACTCAACGTTATTACAGGTTGTTAGCTACTCCT  
TTCGCGGCGTGACGAATTTGATAACTTTCAGGCGCTAATTTATTTCGGTCAAGGTCCATTA  
TGCTCTCGGTTATAACGGCCGGGCCACTCATTATGCGGATCCGTTAGCCTGGGATCGTT  
GACGCGTCAAAAAAAAAAAAAAAAAAAGGAAAAGAAACAACCTTTAACAACCTTCTC  
CTTATATCAATTTATATCGAATATCGATATCGCGGCGTTCGAAGAAATCTGACGAACCGA  
TTAAAAACGATATGTTTTACGATTGTGAAAAATCGTGATATCAGCGAAATTACAATTT  
GGATGAAACGAAATGAAAAAGTTTTAATAACAAATTTTTTTTAAAGTCCGCGTATAAGTC  
GAGGATAATGATAACTAAATAAATCGGAGATAATTTTAAAATCGTTTCATCCTTTCTTT  
TTTTGCACGCCCCGTTTAAATGTTTTAAGACGGAGTAAAGGCGAATCGAGCGCGGAG  
AATAAAGAGGGTTTAACGATTCCGCCGATTTTTTTCGGAATCTTTATTATTACACGCCAA  
TTAATCAGTTTCCGAAGAAGGCGTTCCTCGGAAGGCGTTCAACCTCGTACAAGTAAAA  
ACACCCGCACAATTATGTCATAAAGCGGCCAATAATTTTTTTTACCATCGACAAAGTT  
GCCGACTCGGTGTTTCGCCTCTCGCTTCTATCCTTTCCCGAACCGCTCCTTCTCCATCCGA  
TATCCCCGAGTTCCCGATTATCGAGTTCAACAAATTGAAGTAACACGGTATCTTAATTAA  
ACTTTGTTTGATAAACGTTGCCGATCAACAACGGCGTTCGACTTTTTTTTCTTTTTCTTTT  
TCAGCCAAGCGGACGTGAAAGGGTGATGGGCACGGTTCCTTGAGAGTTTCGAAAAAAA  
AAAAAAAAAGAAAGGAAAAGAAAAAAAAGGAGAAAAGAAAGGAAGAATTTGTAC  
GCTGCCCACGGCGCGGCATCGGGGGACTATCTGAAAGAGAGTCCAGAAATCAGGGAG  
AAGATAATTCGATGTTTATG

>novel\_circ\_000015

GACGAGGTGGGAGGCAGTACGGTGGTAGCCGAGGGTGTCTAGGCGGCATAAAGGGC  
CCAGGCGGCGGGTGCCGCGCATCCTCGATGACGATGGCCGAGAGCGCCGTGGAGGAC  
GCTGCAGCCGCGCCCCGGGTCCGGCCAAGCCGCCACCGCCCTCCTGCACCAACAAC  
AACACCCTCGCGGCGACGGCCAACCGGAACCATCGCAACCTCCGCCGCCGGAACGA  
CTCGACCAGGTCTCTGACATCCTCCAACACCGGAGCTCGCCCTCCGAGGGCGAGGTGT  
TGAGGTTCGAGGGTAGCGGCCCCGCGTCCGAGGAGGAGGAGGACGTGTTCCGCTCCC  
CGAGGTCTGCTTCCAGATCGGCCGCCGACCCGCCGTCCGGCATCAGCCTTCTACCCCT  
CAGGTTGAAGAGCGAGGAGCCCGCCACGCCTACCGGCGAGGACCAAGAGGACGGGT  
CGAGCGCCAACCAAGTCGACCACCGCCACCACCGCCACCACCACCATCACCACCACCA  
TCACCACCACCACCACCACCACCACCGTCAACCACCAACAACAACAACAGCA  
GCAACAGCGGCAGCAGCAACAACAACACGACGACGAGGAGGGCGACAACAACGGC

GAAGGGACGCAGCAACAGCAGCAACCGCAGCAGCAGCAACAGAATCATCACTCGCA  
CCACCACTCGTCGCACCACCACCGCCACCGGCACAGGCATCACCACAGGAACAACGC  
CAACCACCTGGCTTACGACCACCTCCACCCCCCTCATCAAAGATCCTCGGCACCCAAA  
TACGCGGGCTGCACCTGCGTCCAGTGTTCCAGTCCCCACTCCCCCATGGTGCTCCC  
CTCGCCACCTCCCCGCTCACCCCCCTCACGCCCCCTACCCCCGTTAACCCCGCTCACCC  
TGCCCCCGTTAACGCCAGGATCTCTCTCGTCGTACAGTTTCGAGCACTACATGCACACC  
AAGTACCTGCCGATATATTAGGGGACGGAGCCACTCGGACTCGGACCTGGTGCCGG  
GATGGGAGCAGAAGCCGCCGCTCTCCACCGCCTCGTCCGTGTTTCGTCAACCACCCGTT  
GAGGACCGGTTTCTTGAGAGCGACACGACCAGCCCCAGGAGTCCCCGCTCGACCT  
CTCGATGAAGAACCTGATGGCGTCGGCCGCGGCGGCAGCCGCGGGCGGCCGCTGCGGC  
CGCCGCCGCAGCCGCCGCCGCTCGGGCCGCCGCCGCCCTCCAGCTGCTCCCGCCC  
GGCATCGTGTCGAGGGGCTCGGTGAGCGTGCCCGTGGTCAAGGGGGACGTGGCGTCG  
CCCACCACCAAGGAGAGCGTCGCCGTCAGATACAACCTCGAGGTGTGCCCCGTGCTG  
GAGGAGATGCCGCCGGGGGCGGACGTGGCGTACGTTTGCCCCGTGTGCGGGCAAATG  
TTCAGCCTGCACGATCGTTTGGCCAAGCACATGGCGTCGAGGCATCGCAGGCAGGGGC  
CCCAGGACGCGTCCGCCAAGGCCTACCTGTGCGACGTGTGCAAGAGGAGTTTCGCGA  
GGTCGGACATGCTCACCAGACACATGAGGCTGCACACGGGGGTAAAACCGTACACGT  
GCAAGGTATGCGGCCAGGTATTAGCAGGTTCGACCATCTGAGCACCCACCAGAGGA  
CGCACACCGGCGAGAAGCCGTACAAGTGTCCCCAGTGCGCGTACGCGGCCTGCCGCC  
GGGACATGATCACCAGGCACTTGAGGACCCACGCAAGATTTCCCGACGTTTCAGACGCC  
TAAGAGCGAGCCCGGCCTCCTCCCAGGCGAGGACAGCCCCACGTTTCGCTCGGGAGAT  
GGCCTCCCCCTCGGCAACGATCAAAGCCGAATGACGACGGCCAGGTGGATGACCGCC  
CCGTTTCTCGCCGCTCCCCAGCGGATTTTCGAGGAGGAGGAGGAGGTGGAGGAGGAGG  
GAGATCAACTTCGACGAACGGTTTCGGGATCTGGGAGGTGGAGGAGGTGGGAAGGTC  
CCGATGACGACCACGAAGACGAAAGAACGAGAGGAGGACAACGATGGGAG

>novel\_circ\_000017

ATAGAGAGCACTCTTCCTCCGCCGGCGATCGAAGGTAATTTGATCGGGCGCCTCCGAG  
ATCCAGCTGGGAATCCCCGAAAGAACTCAGAGGCGCGAGTTATTGATCGACTGTGGC  
CAACGCCAGACAGAGAAAGAGAGAGAAGGAGAGGGCGAGGGAGAGGGAGAGGGAG  
TGAGAGGAGATCGTGCCCGACGGGGGAGCCGTAAGTGACGGGGAGGGGAGGAGTAA  
ACTTGTGAACCGGAGAGGGGAAAAAGTGTCTGTGTCGGGTACATAAAAGAAAAAAA  
AAAAGAAAAAAGAAAAAAGAAAAAAGAAAAAAGAAAAAACAAAAAAAAAACGTG  
GAATCAAGAGGAAAGGGGGGAAGAAGAAAATTTTCGAGAGATAATCGAGATAGCGTAC  
AATAGTTGGGCAGTGACGAAAGTGTGCAATGTTTTTCGTGTGCGGAGAGAGAACGTTGC  
TCGGTGATCGGATGTATAATTGAAGAAGAAAGGAAGAACGAGGCTTTTGGGTTCCTTT  
CCTTCCATGGACAAGCGCGGTAGAAGATAATCGAGCGCACCTCGAGCCAGGACCGCC  
GACATCCAAG

>novel\_circ\_000019

ATAGAGAGCACTCTTCCTCCGCCGGCGATCGAAGGTAATTTGATCGGGCGCCTCCGAG  
ATCCAGCTGGGAATCCCCGAAAGAACTCAGAGGCGCGAGTTATTGATCGACTGTGGC  
CAACGCCAGACAGAGAAAGAGAGAGAAGGAGAGGGCGAGGGAGAGGGAGAGGGAG  
TGAGAGGAGATCGTGCCCGACGGGGGAGCCGTAAGTGACGGGGAGGGGAGGAGTAA

ACTTGTGAACCGGAGAGGGGAAAAAGTGTCTGTGCGGGTACATAAAAGAAAAAA  
AAAAGAAAAAAGAAAAAGAAAAAGAAAAAGAAAAACAAAAAAAACGTG  
GAATCAAGAGGAAAGGGGGGAAGAAGAAAATTTTCGAGAGATAATCGAGATAGCGTAC  
AATAGTTGGGCAGTGACGAAAGTGTCTGAATGTTTTTCGTGTCTGGAGAGAGAACGTTGC  
TCGGTGATCGGATGTATAATTGAAGAAGAAAGGAAGAACGAGGCTTTTGGGTTCTTT  
CCTTCCATGGACAAGCGCGGTAGAAGATAATCGAGCGCACCTCGAGCCAGGACCGCC  
GACATCCAAGGGGGTCCAACGCGTTACTTTTCCTCGGGATAATGCGAAGCCTGGAGAGG  
TTATCGGGTAGCGATCAAGACTGTGATCAGGAGATGTATATCGACCTGGACGACGCTTC  
CGTCGACTCGCTTACCGGAAAACGAAGTCGCCATCATGTCTGTTGGCGCGGAGGTGGGC  
GAGGAGAGCGACAGCAGCGGGAGCGAAAGAAGCCCTAAACAGGCTAAAAGAAGGAA  
TCGTGGTGGCCACCGACGACGAGGAGGCGAAAGAGCGGGATCTCTGCGCGGGAAA  
GGAACCTGAGGAGGCTCGAGAGCAACGAGAGAGAGAAAGAATGAGAATGCATTCCCTAA  
ATGACGCTTTCGAGCAACTACGCGAGGTGATACCGCACGTAAAGATGGAGAGGAAACT  
CAGCAAGATAGAGACGCTCACGTTGGCCAAGAATTACATAATGGCCCTGACAAATGTC  
ATATGCGAAATGCGTGGGGAGGAGCAACCGTACAC

>novel\_circ\_000020

GGGGTCCAACGCGTTACTTTTCCTCGGGATAATGCGAAGCCTGGAGAGGTTATCGGGTA  
GCGATCAAGACTGTGATCAGGAGATGTATATCGACCTGGACGACGCTTCCGTCGACTC  
GCTTACCGGAAAACGAAGTCGCCATCATGTCTGTTGGCGCGGAGGTGGGCGAGGAGAG  
CGACAGCAGCGGGAGCGAAAGAAGCCCTAAACAGGCTAAAAGAAGGAATCGTGGTG  
GCCCACCGACGACGAGGAGGCGAAAGAGCGGGATCTCTGCGCGGGAAAGGAACCTG  
AGGAGGCTCGAGAGCAACGAGAGAGAGAAAGAATGAGAATGCATTCCCTAAATGACGCT  
TTCGAG

>novel\_circ\_000021

GGGGTCCAACGCGTTACTTTTCCTCGGGATAATGCGAAGCCTGGAGAGGTTATCGGGTA  
GCGATCAAGACTGTGATCAGGAGATGTATATCGACCTGGACGACGCTTCCGTCGACTC  
GCTTACCGGAAAACGAAGTCGCCATCATGTCTGTTGGCGCGGAGGTGGGCGAGGAGAG  
CGACAGCAGCGGGAGCGAAAGAAGCCCTAAACAGGCTAAAAGAAGGAATCGTGGTG  
GCCCACCGACGACGAGGAGGCGAAAGAGCGGGATCTCTGCGCGGGAAAGGAACCTG  
AGGAGGCTCGAGAGCAACGAGAGAGAGAAAGAATGAGAATGCATTCCCTAAATGACGCT  
TTCGAGCAACTACGCGAGGTGATACCGCACGTAAAGATGGAGAGGAAACTCAGCAAG  
ATAGAGACGCTCACGTTGGCCAAGAATTACATAATGGCCCTGACAAATGTCATATGCGA  
AATGCGTGGGGAGGAGCAACCGTACAC

>novel\_circ\_000022

GTGGGCGAGGAGAGCGACAGCAGCGGGAGCGAAAGAAGCCCTAAACAGGCTAAAAG  
AAGGAATCGTGGTGGCCACCGACGACGAGGAGGCGAAAGAGCGGGATCTCTGCGCG  
GGAAAGGAACCTGAGGAGGCTCGAGAGCAACGAGAGAGAGAAAGAATGAGAATGCATT  
CCCTAAATGACGCTTTCGAGCAACTACGCGAGGTGATACCGCACGTAAAGATGGAGAG  
GAAACTCAGCAAGATAGAGACGCTCACGTTGGCCAAGAATTACATAATGGCCCTGACA  
AATGTCATATGCGAAATGCGTGGGGAGGAGCAACCGTACAC

>novel\_circ\_000024

GTCACAGTGGCGTGAATCAGCTCGGGGGTGTGTTTCGTCGGCGGTAGACCGCTTCCAGA  
CTCGACCAGGCCAAAAGATCGTTCGAGTTGGCTCATTCCGGCGCGAGGCCCTGCGACATC  
TCCAGGATACTGCAGGTCAGCAATGGCTGCGTCTCCAAGATCCTTGGAAGCAGGTACT  
ACGAGACCGGGTCGATCAGGCCCAGAGCCATCGGCGGATCCAAGCCCCGCGTCGCCA  
CCGCCGAGGTCGTGAGCAAGATTTCCCTCTACAAGAGCGAGTGCCCCCTCCATCTTCGC  
GTGGGAGATCAGAGACCGCTTGCTCCAAGAAGGCGTGTGCACGAACGACAACATTCC  
CAGT

>novel\_circ\_000027

AGGGGCCTGTCGGTAAGCCTTACTGATGAGTCCTATGGCAGGCCCCAGGACGAAACGC  
TTTCCCTTTTCTATTCTCCCTTCTATCGTCTCTCTCCTTCTTCTTTCAAGTTGCACCGAGG  
CACGAGAATACACGAGAGGGAGAAGGGGGACCATCATCAACGGTGAAATGTGGACAT  
AGATTGTCATTACTCGCAGGAATTTCGTAATTCCTCTCCTAGGATGGTCAACGGGGCCAA  
ATACCACGACGACACGAGTTCTTCACATCCATCAAAACACACCAATATTCCAAATTGGA  
CCGAGATGAAGACCAGGCTAGGACAGTTTAAATACGACTGCTTTATTGCCGCAAACCT  
GTGGAACCGCGTATGGACTTTACGAAAGAGATCTGAAAATCGCTACAAGTTGGCACTT  
CAGCATATATTCTCAATAGAGGTGTGTTATACACTCGTGTTCGCATTGTTTCTACTTCTACG  
GCTTACTTTACTACGCGTCTTCTGCAATTAAGGCAATTTGAATGGCACTCTTTCTTACTA  
TGTTCCATCACCGTCATGGGGGAAATAAAACAGTCTTTCTTGTGGAATGCCTCGTGGAA  
GGCGAGAGAGAGAGAAGTACTGTGTATTGCCCCACTTAGGCAGATTTGGAACGAACA  
AGGACTTCGTGCAAATATACCTGCAACTAATTCCTCTATTCCCTCCAATCGTCTAAGGC

>novel\_circ\_000028

TAGAATGGACGGGCGCGGTATTATCGATGCCGCCGATAACCGCGCCCCAAAAATCG  
GCACAATCGCCGCAGCCGCAGTCGCATTCGAAATCCAATCAGGAGTTGCAGGTGGGCA  
CCGTGTCCCTTTACGGAATCCACATCGTGTTCGCTGGTGATCGAGGGCCAGGAGAGACT  
CTGCCTGGCCCAGATCAGCAACACGTTGTTGAAGCAGTTCAGCTACAACGAGATCCAC  
AACAGGAGGGTTCGCGTTGGGCATCACCTGCGTCCAGTGCACCCCCGTCCAGTTGGAA  
ATCCTCCGCCGTGCCGGTGCCATGCCCCGTCTCGTCGAGGAGGTGCGGGATGATTACCC  
GGAGGGAAGCCGAGCGTCTCTGCAAATCGTTCCTCGGCGACAATGCGCCCCCAGAC  
TGCCGGAGGACTTCGCCTTCTCGGTGCACCACGAGTGCGCGTGGGGTTGCCGGGGCG  
CGTTCCTGCCTGCCCCGTTACAACAGTTCCCGCGCCAAGTGCATAAAGTGCGCCTACTG  
CGGCCTCTTCTCTCGCCGAACAAGTTCATCTTCCACTCGCACAGGATCGGCCCCCTCGG  
ACAAGTACGTGCAACCGGACGCTGCCAACTTCAACTCGTGGCGGGCGCCACATGAAGC  
TGTCGGGAATCCGCCGACGAGGTGGTGCACGCGTGGGAGGACGTGAAGGCGATGT  
TCAACGGGGGGACAAGGAAGCGATTGCTCAACAACCCGAGTTCGAGGGAGTCGCCGA  
GCCCCGCCAAGCAGCCGAGATCGTCGCCACCGCTCAGATACCCACTCTCGTCCCCTC  
CCCCACCCATCCACGGGTGCCCCCGTTCCCGGAGTTACCTCTGCCGCTGTCGAGGAGC  
CTGGTGATGGATTACGTGTGGCACCAGCACCAACAGGCCGCCGCTGTCGCGGCGGCA  
AAGACGCCCCGCTTCCCATTCTCCCCGTACGCTTTGCCGTGGCTGGCCAAGAGGGGAC  
CGTCTCTTTCCCGGGCCTCTACCACCGCCGATAAGCGGCTCCAGCCCCACGGAACC  
GCTCATACCAACGGTCAACCCGTCGTTGCATCAATCCGCCTTTCGCCCCGTGATCCGCG  
GCCCCCGGATCGTCGAACCCGTCGCCAGGAACACCCCTCCGAGCACACCCCCGCGT

```
>novel_circ_000029
```

```
>novel circ 000030
```

[illegible]

TAACCACGCTTAACACAGCTTAACCGGCAAACAGCGCTAAGAGCCGCGCACACTGGT  
CTCTCACCCGACTAAACGGCTGCGATCGATAACGAGTGGTGTGTTGATAAAGAGCAACC  
GAGGCGATAACGGTGTGTGTGTATGTGTATATGATCGTCTAAAAATAGAGTATAGAGAA  
TTGGCCGTACGTACATTTGCCGGTGACAATCGTAGCAAGCCTTTCACGTACACACGAA  
CACGGGTGTTTCGATAATAATAATATTAATAATAATAATAATAATAATATTAATACGCGACA  
ACGAAGGTAGCGAGGCGAATCGAAAAGAAGGAAGGAAGGAAGGAAAATTAAGAGGA  
AGAGAGAGGATTTTTTCGAGAGGGTTCTGAAAACCTCGGGCGAGTTGGAGAGAAGATAA  
GTTCTTCGCACGGTTCTTTGCCGCGTGTTCTTTTTTTTTTTTTTTTACACCTACGTGATTG  
TACGCACCACCACGGAAGATAGAAAAGCTGGAGGCCTGAAGATAGAGAAAACCTCTACA  
CGAAGATAGAAAAAGATCGAAGATCCGCAGACTCGCCACTTGGGACCCGTTTCATGG  
GACAATAAGTTACTCCTCGCTCCTACTCAAAGAAACACTTCTTGCTCGAAAAAGACGG  
TGCAGTGAACGCGACCGTGAACAGGCTACGTGGGGATCGAGAGGAAGAGGAGAGAT  
AAAGTTGAAAAGTCGGGTGAGTAGCGCACCGGACTTTTGTGTTATCCTTCGCTCGAA  
GAGGAAGTTATAAGTCGCACGGTCTTCCAGGAATTGGAATTATGGCAATGGTCAACATG  
AATAACCTGCTGAACGGCAAGGACTCCCGGTGGCTGCAGCTAGAGGTTTGCAGAGAG  
TTCCAGCGCAACAAGTGCACCAGGCCCGACACGGAGTGCAAGTTCGCCCATCCACCG  
GCTAACGTCGAGGTGCAGAACGGACGGGTCACCGCTTGCTACGACAGTATCAAG

>novel\_circ\_000031

GGCCGATGTAATCGGGAGAAACCCCGTGCAAATATTTCCATCCACCGCAACATCTGA  
AGGACCAGCTTTTGATAAACGGGCGCAATCATTTGGCCCTGAAGAACGCGCTGATGCA  
GCAGATGGGTCTCACACCGGCCCAGCCACTAGTGCCTGGCCAGGTACCAGCAGTGGA  
GGCACCAGCACCTCCGGCACCACACCATCACCTTCAACAGCAAATCCAGCAGCAACTT  
CTCGCTACCCACGCCTTTATGGCGACGAATCCGTACCTGACCGGTATGCCGCAGGTTGG  
CAACACGTACAGCCCGTATTTTCGCGCCCAGCCCCATCATGCCAGCGATCATGGGGCCC  
GCGGACCCAACCGGAGTCGGAAGCCCGTTGGGCGTTGTCCCGCAGACGGTGGCGATG  
CCGCAGAAGATGCCACGTACCGACCGCCTCGAG

>novel\_circ\_000032

GCGACGAATCCGTACCTGACCGGTATGCCGCAGGTTGGCAACACGTACAGCCCGTATT  
TCGCGCCCAGCCCCATCATGCCAGCGATCATGGGGCCCGCGGACCCAACCGGAGTCGG  
AAGCCCGTTGGGCGTTGTCCCGCAGACGGTGGCGATGCCGCAGAAGATGCCACGTAC  
CGACCGCCTCGAGGTATGTCGCGAGTTTCAACGCGGGGCGTGCAAACGCGGCGAGAC  
GGAGTGCCGGTTTTCGCGACCCCCCTCGAGACGGTGCAGGCGAACGAGGACGGCTCTGT  
GACGGTCTGCATGGACGCTGTCAAGGGCCGATGCAATCGGGACCCCTGCCGCTATTTTC  
CACCCCCCTCTGCACCTTCAAGCCCACATTAAGGCCGCACAATCTCGGGCTAGCATTGC  
GACGGCGACTATGCCGACGAACGTAGCGGGAATGGGCGCGTTGGCTGGCGGAGTGTC  
AGGAGTGCCGGCAACTGCGGTTCCCGGAGGACTTCAGAGCGCCAGTATGGCAAGCAT  
CGAACTCGGCAAGAAGCGGATGCGCGACTCCAATGATGATCTGCTAATGGTACCACGG  
CTTATGCATGAAATGGACATGAAGTCTGTTCGGATCGTTCTACTACGAGAACTTTGCCTT  
CCCAGGAATGGTTCCGTATAAACGACCGGCGGGCGACAAGTCCGGCATGCCGGTCTAT  
CAGCCTACCGGCGCGACGACCTATCAACAGTTAATGCAGCTGCAGCAGCCCTTCGTGC  
CTGTGTCAT

>novel\_circ\_000033

AGTGCAATATTCGTGATTATATATGATAGGATGGACGCAGTCGAGTGGTCGTCGAAGAT  
CGGCGAGAGAAACGTACCACTCGAGTGGTAGCCGGCGGTACACGAGGTCTTCCTTGAT  
CCTGCCTTTTCTTTTCTCTTTTCTTGCCTAGTTTCCTTAACACTTCCACGAAAAAGAGC  
CAAAACAAGATACATCGAATAACCAAATTTTTTTTTTTTTTCAAAGTATCTCTTCGTTT  
AATCGTCTGCACAGACATTTCTCTTTCTCATCGAGCTCTATTTCCGGTCGATTTGAAATTC  
ACTCTCCGTTATTAATCACTATTTTGCTTCAATATT

>novel\_circ\_000034

GTTATGCGTTCTTGTACAAAGGTATCAGCTCGACAGTGTTACGTGCGTTTCCTATGAATG  
CTGTCACGTTCACTGTGGTCAACTGGACGTTCAAATTGCTTGGCGAAGATGAGAAGAA  
GAAGTCGAAAACCACAGAGTCTATCGGTGAGATTTCAGAACCGTGCGAAATACTTTTG  
GAAAAATGGAACAATTTCCTAACGAGCGCATCCCGAAGTATGGTTATTCATAGGTTACC  
GTATTCCACGTTGTGCTTGACATCGATGAACGAACCGAAGCTCGAGTGGGGCGTGCGC  
AATAGGCGAATGAAGGAAG

>novel\_circ\_000035

GTACTACTTGATTGGGCTGTACTCGAACTACCTGGTTGTTCTGTGCTACCTGAACTGGA  
TTGTTGTGTATTAGTGCCAGATCCTCCTGTACTACTTGAGGATGGCAGTCCTGTACTAGA  
CGATCCTCCTGTGCTACCTGACGTGGATGGTGTACTAGAGCCAGGTGGTCTTTCTGTGC  
TACCTGAACTTGGTTGTTCTGTACTAGCACTAGACGATCCTCCTGTACTACTTGATTGGG  
CTGTACTCGAACTACCTGGTTGTTCTGTGCTACTTGAACCTGGATTGTTGTGTATTAGTGC  
CAGACGATCCTCCTGTACTACTTGAGGATGGCAGGCCTGTACTAGACGATCCTCCTGTG  
CTATCTGACGTGGATGGTGTGCTGGAGCCTGATGGTCTTTCTGTGTTCCCTGAACTTGG  
TTGTTCTGTACTAGCACTAGACCATCCTGCTGTACCACTTGATTGGGCTGTACTCGAACT  
ACCTGGTTGTTCTGTGCTACTTGAACCTGGATTGTTGTGTATTAGTGCCAGACGATCCTC  
CTGTACTGCTTGAGGATGGTAGTCCTGTACTAGACGATCCTCCTGTACTACTTGATTGG  
GCTGTACTCGAACTACCTGGTTGTTCTGTGTTAGTTGAACCTGGATTGTTGTGTATTAGTG  
CCAGACGATCCTCCTGTACTGCTTGAGGATGGTAGTCCTGTACTAGACGATCCTTCTGT  
GCTACTTGATGTGGATGTACTAGAGCCTGGTGGTCTTTCTGTGCTACCTGAACTTGGTT  
GTTCTGTACTAATGCTAGACCATCCTCCTGTA

>novel\_circ\_000036

TACAGGAGGATGGTCTAGCATTAGTACAGAACAACCAAGTTCAGGTAGCACAGAAAG  
ACCACCAGGCTCTAGTACATCCACATCAAGTAGCACAGAAGGATCGTCTAGTACAGGA  
CTACCATCCTCAAGCAGTACAGGAGGATCGTCTGGCACTAATACACAACAATCCAGTTC  
AACTAACACAGAACAACCAGGTAGTTCGAGTACAGCCCAATCAAGTAGTACAGGAGG  
ATCGTCTAGTACAGGACTACCATCCTCAAGCAGTACAGGAGGATCGTCTGGCACTAATA  
CACAACAATCCAGTTCAAGTAGCACAGAACAACCAGGTAGTTCGAGTACAGCCCAATC  
AAGTGGTACAGCAGGATGGTCTAGTGCTAGTACAGAACAACCAAGTTCAGGGAACAC  
AGAAAGACCATCAGGCTCCAGCACACCATCCACGTCAGATAGCACAGGAGGATCGTCT  
AGTACAGGCCTGCCATCCTCAAGTAGTACAGGAGGATCGTCTGGCACTAATACACAAC  
AATCCAGTTCAAGTAGCACAGAACAACCAGGTAGTTCGAGTACAGCCCAATCAAGTAG  
TACAGGAGGATCGTCTAGTGCTAGTACAGAACAACCAAGTTCAGGTAGCACAGAAAG

ACCACCTGGCTCTAGTACACCATCCACGTCAGGTAGCACAGGAGGATCGTCTAGTACA  
GGACTGCCATCCTCAAGTAGTACAGGAGGATCTGGCACTAATACACAACAATCCAGTT  
CAGGTAGCACAGAACAACCAGGTAGTTCGAGTACAGCCCAATCAAGTAGTAC

>novel\_circ\_000037

AAGCGAGAGAGGTCACCGGGAAGAAAGAATGGACCGACTTCGACGAAGTTTTTCGCGAT  
AGCTTTTCGACGGCGGAAAGATCCTCATGTACCGGAATCGAGTAAACCGCATCAATGGC  
AAGCGGACGAAACGGGCTGTCCGCTCGGCCACATGTGCTTTCCATGTTAAGTACCTGGG  
ATGTGTCGAGGTGTTTCAATCAAGGGGTATGCAAGTGTGCGAGGAAGCTCTAAAAGTA  
CTTAGGAACCTCGAGGAGGCGGCCGGTACGCGCGGTGCTGCACGTATCGGGAGACGGT  
TTGCGGGTGGTTGAAGATGAGACAAAAGGGGCTGATCGTCGATCAGACGATAGAGAAA  
GTTTCCTTTTGTGCACCGGATCGAAATCACGAGAAAGGGTTCAGTTACATCTGTAGAG  
ACGGCACGACCAGACGGTGGATGTGCCATGGATTTTTGGCATTGAAAGAATCGGGAGA  
ACGTTTGAGTCATGCAGTGGGATGTGCTTTTGTGCGTGTCTGGAAAGAAAGCAACGA  
AGGGACAAGGAATGCGGTGTCACGATGACGTTTCGATTCGAAAACCTTCAACCTTCACGA  
GGAGCGGCAGTTTCAGGCAGCCATCTTTAACCGAGCGATTGCAGGATTCGCGCGAACG  
CGCCGTAGATGTACCACCTATAAAGCAAGTCTACAATCCTTTTTCGATAGAGAGACCAC  
ACGCCACCCCGTCGATGCTCGAAAGACAAGGTTTCCTTCCGGGGTTTCACTCAATTGAA  
CCAAGCATCACCGTTCAAAAGGCAGCTTAGTTTACGGATTAACGATCTTCCTAGCAATC  
TTGAACGCACACGTAGCCATAGCCTTGAACCGACGGATTGTACGGATGCCATCTGCT  
ATGTCTCACATCGTACCTCTCAAGCCACCAG

>novel\_circ\_000038

AAAAAAAAAGAAAAAGACAACACTCCTCGAACGAATCCATCCACCTACGAGCTACCTC  
CATGTTTTATTTTCGCGTACACGCGCACCGTTTCCGCGTATGGTCGCCACTGCTTGGTCTG  
TTCCACATTTAACCGAGGATAGATGGCAGCACACTGATTGTCAATCGTGGCGCGTTACT  
CTGTGAACGCTCTGCTTCGTAAATACAAAAAACGATATTAAAAAGA

>novel\_circ\_000039

GGTCCACCGGAGGTAGCCTGAGTCCTGTACGTCCCTAGCGCTCAATTCCTTAACGGG  
GACACCTTTGAACGGGTTGCAGGACTCGTTGAGCAACGCCTACTCGAGCTTACAACAG  
TACGCAGCTCTCATTGGAAGACGACGGTGACCGTGGAAGAAAGAAAGAAATTACATAGAT  
TTCCCGCGTTACAGCGGCGGCGGCGGCGGCGGCGGCGGCGGCGGCGGCTCAAAAGGCGAAAT  
TCACTAACACGGATAAGCAGATAGAGGGTCCAGAAGGTTGCAATTTATTTATATATCATC  
TACCGCAGGAGTTCAGCGATACTGACCTTGTCTCAACGTTTCTGCCGTTTGGAAATGTC  
ATCTCGGCGAAGGTTTTTCATCGATAAGCAGACGCAATTGAGTAAATGTTTTGGCTTCGT  
GTCGTATGACAATGTGGCGAGCGCACAAAGCAGCAATCCAAGCGATGAACGGCTTCCAG  
ATCGGCATGAAGCGGCTGAAGGTCCAACCTGAAACGATCCAAGGACGCATCGAAACCC  
TACTAGCCGACATCGTCCACCGTTTCGTAG

>novel\_circ\_000040

CAAATGCGGGAGTATCGCCGATGAGTATGCAAAACCTGGTTACCCTGGCTGCCATGAC  
AGGCGGAAACGGCAACCTTCAAGTGTGCGCAAACACGTTAAGCGGACTGGCGAATTC  
GACAGCAGGTATGTCGCTATCTGTCCTTCTTGGAAGAGCGGAAACACAGGGTCCACC



```
>novel_circ_000041
```

```
>novel circ 000042
```

AACGTAATTGTTCTGTTGGTATGCTGTCCAAAAAGTTTACCGAGAACGACGTTAGAAA  
CATGTTTCAGCGTGTATGGAACCATCGAGGAATGCTCGGTGCTGAGGGACAGCACCGGG  
AAAAGTAAAGCCTGTGCCTTCGTTACCTTCGCTAGTAAACAATACGCCATCAACGCCAT  
TAAAGCTCTTCATCACTCGCAAACGATGGAGGGATGCTCGTCGCCGCTGGTTGTGAAA  
TTTGCAGACACGCAGAAGGAAAAGGACCAGAAGAGGATGCAACAACCTTCAGACGAA  
TCTTTGGAATATAGCAGGAGTCAATATGGCGCCGCATTACCTGACCAACGATACGCCAG  
CTTTGGCTCCCGCCTCGTTACAGCTGTTGCAACAACCTTCAAGCGACAACAAGCGCCGC  
GACTCCAGTTGCGGCAGGTGCTGGCGCAAGCGCGCTGTCGAGCGTACAGCATCAATTG  
TTGCTCCAACAGCACCTCGGTCTCGGCGCAGCAACTCCTGCGCATGCGGCCGCGCCAG  
CCGTTCCGAGTCCGCCGGAAATCAACCCTGCGAATCTGCAGGGACTGGCGACGCTCGC

```
>novel circ 000044
```

```
>novel circ 000045
```

```
>novel circ 000046
```

ATGACACTCGGCAGGCCGTCGTCTAGGGTCGACGCAGCTTTCCACCTCCCTCCACTC  
GCCGAGAAAATCACCATGATCATCGAAACGCTCGTAAGAATATCATAATCCATCCCCGC  
GACAACAACAACAACAATATCCCAGACCCGCAACAAGTAGCCAAACTATATAGCT  
TATATATATATAAAACCCAACCTAATCGGCGAGTCTAATAAAAAAGCTCGTAAAAGAGA  
GAGAAAAAAAAAAAAAAAAAGGAGGAAAAGAACTCGAAGAAGAAGAATAAGAGGAAAA  
AGAAGATAAGGATCAAAGGCGAAGGAGGAAGAGGAGGAGAGAAAAAAAAAATAAA  
TAAATAAAAAAAAAAGGAAGCGCGGAGAAGCGTGTGCGTGCGTGTGTGTCAAAGTTGGA

AGCGGGCTGAAGAAGGAAAGTGGAGCGTAAATGCTCGCAGAGGCGCTTAAGCGGGCT  
TACGCGCGAGCAAGCGTATCGTGAGCCGGCTTCGTAACGTGAAAACGTGTGAGGGATG  
CGGCCCATGGGCGAAGGGTGGGGTCTTTGGGCACCGATAAGGCTTATCCGAAGATACG  
ATGGCCGGCTGCTCGGCTCTTGTCGCCAGTCGTAGTGCTCAGGTGGCCGAGGCGGGAT  
CGTCGTGCGCTTTAATTCACGCTACGATATCGCGGCTACGCGTCTATTCCGAGTATCACC  
ATCGCTATCGCATCGGGCTGGCCGGGATCGCCGATCGTTCGATCGAAGATCGGAGTCAC  
GCGTGAGGACCACACGGGAACCAGGTGGCCAAACGGGTGTGCTCCGCAGGGGGTGA  
CGATTGGCCGTGGATCGACCGACAGAAACAGGGTGAACGAGGCCGAGGGAAGGAGG  
CACCGAGATCCGGCCGGCGGGAGGAGGACTCCTATGAAAATGCTTCAATCGTTGAACG  
CTCTGGCGGGTAAGATCTCGCCGGGCTCGCCGACCGACAGCAACGCGAACAAGGTGC  
ACATGCACAACAATAACAACAACAATAACAACAACGTGGTGCATCATCATCATCCG  
TACTCGAAGCAACAGGCGCAGCAGCCGTCGCCGTCGTCGCAGTCGAGCAACGGCGAC  
CAGAAGGAGAACAC

>novel\_circ\_000047

ATGACACTCGGCAGGCCGTGTCGTAGGGTCGACGCAGCTTTCCACCTCCCTCCACTC  
GCCGAGAAAATCACCATGATCATCGAAACGCTCGTAAGAATATCATAATCCATCCCCGC  
GACAACAACAACAACAATATCCCGACACCGCAACAAGTAGCCAAACTATATAGCT  
TATATATATATAAAACCCAACCTAATCGGCGAGTCTAATAAAAAAGCTCGTAAAAGAGA  
GAGAAAAAAGGAGGAGGAAAAGAACTCGAAGAAGAAGAATAAGAGGAAAA  
AGAAGATAAGGATCAAAGGCGAAGGAGGAAGAGGAGAGAGAGAAAAAATAAA  
TAAATAAAAAAAGGAAGCGCGGAGAAGCGTGTGCGTGCGTGTGTCAAAGTTGGA  
AGCGGGCTGAAGAAGGAAAGTGGAGCGTAAATGCTCGCAGAGGCGCTTAAGCGGGCT  
TACGCGCGAGCAAGCGTATCGTGAGCCGGCTTCGTAACGTGAAAACGTGTGAGGGATG  
CGGCCCATGGGCGAAGGGTGGGGTCTTTGGGCACCGATAAGGCTTATCCGAAGATACG  
ATGGCCGGCTGCTCGGCTCTTGTCGCCAGTCGTAGTGCTCAGGTGGCCGAGGCGGGAT  
CGTCGTGCGCTTTAATTCACGCTACGATATCGCGGCTACGCGTCTATTCCGAGTATCACC  
ATCGCTATCGCATCGGGCTGGCCGGGATCGCCGATCGTTCGATCGAAGATCGGAGTCAC  
GCGTGAGGACCACACGGGAACCAGGTGGCCAAACGGGTGTGCTCCGCAGGGGGTGA  
CGATTGGCCGTGGATCGACCGACAGAAACAG

>novel\_circ\_000048

AATGGTGGAGCCAAAGATGGCTACGACATGAATCTTGCCCCGGCGTGGCAGAAAGGTT  
ACACTGGTAAAAGTGTCGTCTCGATCCTCGACGACGGAATACAAACGAATCATCC  
GGATTTGGCGTTGAATTACGATCACCAAGCCAGCACAGACATCAACGACAATGACAAT  
GACCCGATGCCAAGGGACAATGGCGACAACAAGCATGGAACTCGCTGCGCCGGTGAG  
GTCGCTGCCGTCGCTTTCAACCAGTATTGCGGCGTTGGAGTCGCGTATAATGCCAGCAT  
AGGAGGCGTTTGAATGCTCGATGGCCGGTTAACGACGCGTCGAAGCCAGGGCGTT  
GGGATTGAATCCTGATCACATAGACATATACAGCGCTTCTTGGGGCCCGGAGGACGATG  
GCAAGACGGTGGACGGTCCCGGTCCTCTTGCCAGGAGGGCGTTTATCTACGGAGTAAC  
CAGCGGGCGCAAAGGCAAGGGTTCCATCTTCGTATGGGCGTCCGGGAACGGTGGCCG  
CCACACGGATTCTTGCAACTGCGACGGTTACACGAACAGCATCTTACCCTGTCCATAT  
CTAGCGCCACCCAAGGCGGCTACAAACCTTGGTACCTGGAGGAGTGCAGCTCGACGC  
TCGCCTCGACGTACTCGTCCGGCACGCCCCGGCAACGACAAGAGCGTGGCCACCGTGG

ACATGGACGCGAAACTGAGGCCGGACCACATATGCACGGTCGAGCACACGGGGACGT  
CTGCCTCGGCGCCCCTCGCGGCCGGTATCGCCGCCCTGGCCCTCGAGGCCAACCCGAG  
CCTCACGTGGAGGGACATGCAGTACCTGGTGGTGCTCACCTCGAGGTCGACCCCCCTC  
GAGAAGGAGTCGGGCTGGATCTTGAACGGGGTTAAGCGGAAAGTCTCCCACAAATTC  
GGTTACGGGCTCATGGACGCGGGCGCTATGGTGAACCTGGCCGAGCAGTGGACCAAC  
GTGCCTCCCCAACATATCTGCAAGTCCGATGAGATCAACGAGGAGAGGCGCATCGACC  
CGACCTATGGTTACACGCTGAGCGTGTACATGGACGTCACTGGTTGCGCCGGATCCGT  
GAACGAGGTCCGGTTCCTCGAGCACGTGCAGTGCAAG

>novel\_circ\_000049

GTACGATGGTTCCAACAGCAGCACGAGAAGAAACGCAAGAAGAGGGATTTTCATGCCC  
TCGTCTTCTCGTTTCGATTATCCGACGTTTTTCGACGAGTTCGGCCACGTCCCAGGCA  
GACCACGTACCATCGGCAAAGGAACAGAGGTGTGCCTCTTCAAAACCTGTTACGGAT  
CCTCTCTTTAAGGAACAGTGGTACCTGAATGGTGGAGCCAAAGATGGCTACGACATGA  
ATCTTGGCCCCGGCGTGGCAGAAAGGTTAACTGGTAAAAGTGTCTGTCGTCTCGATCCT  
CGACGACGGAATACAAACGAATCATCCGGATTTGGCGTTGAATTACGATCACCAAGCC  
AGCACAGACATCAACGACAATGACAATGACCCGATGCCAAGGGACAATGGCGACAAC  
AAGCATGGAACTCGCTGCGCCGGTGAGGTGCTGCCGTGCTTTCAACCAGTATTGCG  
GCGTTGGAGTCGCGTATAATGCCAGCATAGGAGGCGTTTCAATGCTCGATGGCCCCGTT  
AACGACGCCGTCGAAGCCAGGGCGTTGGGATTGAATCCTGATCACATAGACATATACA  
GCGCTTCTTGGGGCCCCGGAGGACGATGGCAAGACGGTGGACGGTCCCGGTCCTCTTG  
CCAGGAGGGCGTTTATCTACGGAGTAACCAGCGGGCGCAAAGGCAAGGGTTCCATCTT  
CGTATGGGCGTCCGGGAACGGTGGCCGCCACACGGATTCTTGCAACTGCGACGGTTAC  
ACGAACAGCATCTTCAACCCTGTCCATATCTAGCGCCACCCAAGGCGGCTACAAACCTT  
GGTACCTGGAGGAGTGCAGCTCGACGCTCGCCTCGACGTACTCGTCCGGCACGCCCCG  
GCAACGACAAGAGCGTGGCCACCGTGGACATGGACGCGAAACTGAGGCCGGACCAC  
ATATGCACGGTCGAGCACACGGGGACGTCTGCCTCGGCGCCCCCTCGCGGCCGGTATCG  
CCGCCCTGGCCCTCGAGGCCAACCCGAGCCTCACGTGGAGGGACATGCAGTACCTGG  
TGGTGCTCACCTCGAGGTCGACCCCCCTCGAGAAGGAGTCGGGCTGGATCTTGAACG  
GGGTTAAGCGGAAAGTCTCCCACAAATTCGGTTACGGGCTCATGGACGCGGGCGCTAT  
GGTGAACCTGGCCGAGCAGTGGACCAACGTGCCTCCCCAACATATCTGCAAGTCCGAT  
GAGATCAACGAGGAGAGGCGCATCGACCCGACCTATGGTTACACGCTGAGCGTGTACA  
TGGACGTCACTGGTTGCGCCGGATCCGTGAACGAGGTCCGGTTCCTCGAGCACGTGCA  
GTGCAAG

>novel\_circ\_000050

GCCGGCACAAAGTTATGTAAACATCAAGAGCAGCAGTCCTGTGTCTCCAAGAACGATA  
GGAGCAGGAGTGACGTACGTGCAGGGTGGTGC GGCTGCATCTTACGCGGCGGGCGGCG  
GCGGCGGCGGGGACGACCGGAAGTGGAAGTGGCGGAGGTCCTTCAATCGGAGGAGG  
CGGCGGCGGTGGCGGAGGAGGTGGCGGTGGTATCAACAACGCCGGTGGCGCGAATAG  
TGGAAGTGGAGTCGTTGGGACTGGAGCTGGTGGCGGTGCCGTTGGAACGTAGCATC  
GGTCGGAAATGGTAGCAACAACGGTACCAATAACAGTGCCGGCACGGGGAACAACAG  
TGGTGGAAACGGTGGTACAGTGGGTAGTGCGCCAGGGGGTTATGTTGCCGTTCCCATG  
GCTGGCGGTCTGCGGTACATCCATCCGTATCCATCGACGCCAACGTCCGCATCGGTGCC

GGCTGTAGCGACAATGGTTACCTCAGCCTCGTCGGCACCGACTCCAGTGCCAGTTCCA  
GCACCCGCAGCCGCGCCTGTCAATCCACCTACAGTTAGTCAAACGCCACCACCATCGC  
TTTCGGGAACTGCTTATGCCGCGAGAGACGCATATCGCAGCGCCACCACGAATGTGAA  
CGAGAGGATTGCCATCAGCGTGAGCAGTAGTCCTTTGTCGCAGATTGGAGTCGATGTT  
GGAGTAGTTGCGGCCGAATACGCGGCAAATAGCGGTATAAGTAGTGGAAGAGGGGAG  
AGACCGAGGATATCTCTTTTACCACCTGCTTCGGTAACGCCGACACCTTCACCAACAGC  
ACCAGGCTATCAGCACAAACATGTCTGGAGTTAGAAATTCACGAATAGCCCTGATGCCC  
GTCCAGCCGGATCAGTATTGCAATCGTACAGCCGTTGAAATGGCTAATCTGCAGGAGG  
CGCCGCCCTTCAAGAAGATACGCCTCAGTCAACCGACCCAGATTCAATTGCAGTCCCA  
AACGCAATCTCGTTGTCATAGTTTATCACCCGCTGATCCGTGTGTTAAGCAGGAGCACG  
TGGTGCAGTTGCAACAACCGCTTAGGATAGATACTAGG

>novel\_circ\_000051

GCCGGCACAAAGTTATGTAAACATCAAGAGCAGCAGTCCTGTGTCTCCAAGAACGATA  
GGAGCAGGAGTGACGTACGTGCAGGGTGGTGCGGCTGCATCTTCAGCGGCGGGCGGCG  
GCGGCGGCGGGGACGACCGGAAGTGGAAGTGCGGAGGTCCTTCAATCGGAGGAGG  
CGGCGGCGGTGGCGGAGGAGGTGGCGGTGGTATCAACAACGCCGGTGGCGCGAATAG  
TGGAAGTGAGTCGTTGGGACTGGAGCTGGTGGCGGTGCCGTTGGAACGTAGCATC  
GGTCGGAAATGGTAGCAACAACGGTACCAATAACAGTGCCGGCACGGGGAACAACAG  
TGGTGGAAACGGTGGTACAGTGGGTAGTGCGCCAGGGGGTTATGTTGCCGTTCCCATG  
GCTGGCGGTCTGCGGTACATCCATCCGTATCCATCGACGCCAACGTCGGCATCGGTGCC  
GGCTGTAGCGACAATGGTTACCTCAGCCTCGTCGGCACCGACTCCAGTGCCAGTTCCA  
GCACCCGCAGCCGCGCCTGTCAATCCACCTACAGTTAGTCAAACGCCACCACCATCGC  
TTTCGGGAACTGCTTATGCCGCGAGAGACGCATATCGCAGCGCCACCACGAAT

>novel\_circ\_000052

TACACAATGCGCTAGGAGTGATGGAGACAGTGAGCAAGCAAGTCCAGGTAGTAAGCG  
GACTGGGGGTGGGGGGTCCGGTGGGCCCTGTGGGTCCAGTGGGGGCAGATTTGCATC  
ACCATCATCATCCTCACCCCCACTCCCATCCTCCACACCCACACGCCCACCCCCACGGT  
CATCCTCACGGACCCCATGGCCACTCACTGGTTCGGTGTAACGTCGACCCCTGGCAGGG  
GTCAGACACAACCACCGGTCTCGCATAACCAGCATTTACCCGCGAGGTCTACTCCGGT  
ACAGCTGCATAGTATATATGAACGGTTATGTAGTGTATTTAATGAAATTATTAAAGTGA  
AATTACAAATTTGAAAACGCGATGTACCAGATGTGCAAATGGAGAATGTATGCAGAA  
AGGAAAGATTTCTTTGAAACTCAAGATTGTCCGTTGCATGATGAAGCCGGCACAAAG  
TTATGTAAACATCAAGAGCAGCAGTCCTGTGTCTCCAAGAACGATAGGAGCAGGAGTG  
ACGTACGTGCAGGGTGGTGCGGCTGCATCTTCAGCGGCGGCGGCGGCGGCGGGG  
ACGACCGGAAGTGGAAGTGCGGAGGTCCTTCAATCGGAGGAGGCGGCGGCGGCTGG  
CGGAGGAGGTGGCGGTGGTATCAACAACGCCGGTGGCGCGAATAGTGGAAGTGAGT  
CGTTGGGACTGGAGCTGGTGGCGGTGCCGTTGGAACGTAGCATCGGTTCGGAAATGGT  
AGCAACAACGGTACCAATAACAGTGCCGGGCACGGGGAACAACAGTGGTGGAAACGGT  
GGTACAGTGGGTAGTGCGCCAGGGGGTTATGTTGCCGTTCCCATGGCTGGCGGTCTGC  
GGTACATCCATCCGTATCCATCGACGCCAACGTCGGCATCGGTGCCGGCTGTAGCGACA  
ATGGTTACCTCAGCCTCGTCGGCACCGACTCCAGTGCCAGTTCCAGCACCCGCAGCCG  
CGCCTGTCAATCCACCTACAGTTAGTCAAACGCCACCACCATCGCTTTCGGGAACTGC

TTATGCCGCGAGAGACGCATATCGCAGCGCCACCACGAAT

>novel\_circ\_000053

GAATACTGCCGGGACTATTGCCGTTGCTGCCATTATCACTACACAAAAATATAAGAAGA  
ATGATATCCAAAGATAAAATGCTTCGATAGATGAAGTAATTTGCGCAACAACATAAAAA  
GATTAGAAAAGAAACAGAATTATTAATTTCAAATGTATGTATTATTAGAAAAGTTTGATT  
AAAAACGAATGGAAACGAAACGAAATAAATACATAAAGGAAGCAGAAGAAGATTAAT  
GATAGTGAAAGAAACAATAGAATGATATATACTTTAAGAAGAAAAGAATATTGATTGTA  
ATATTTTTCGCACGACCAGTTTTGTGATGATTCGCAAATGTGCGTATGTGTGTACGTGAT  
TGTGTATACGTTAAAACTGTGCGCGTATGTTTCTCGTTCTGCCATCTTGAAAGTCATCCA  
ATTTCTTTCTCTTGGTGGCGCTGGCTCACGTGTGCGGGAAGCGTGCACGGTGC GTGCA  
TCGTACACGCACTGTGCTAAGTTGCTAATAAACGAAGAAATCTCATTTTGAAAATAACT  
GCAAAACAAAGATTTATCGATAGCGATATAGTAAAACTGCGCGATGAAAGCGAGTTTGT  
CGATAAATTTATTTCTTTGTGGGAGTGATAACGAGTGTCTTAACAATATTAATAGTGAGA  
GCAGTATCGGTAGCAACAACAATCTCGGCAACAGTACACATGACATTAGTAACAGTAA  
GAAAAACGGATATGACAAATGGTTTTAACAGCAACAAGAAATCACAAGTGGAATATAAT  
GTGCAAGTTAAGTGTAAGCCATATGGCAATGATGAGCAGTTGCATTTCTGTGAGGTGTA  
CTCGTACTGATTGTGAGTGCTAGTAGAGAAAAGAGAAAAGCGGGAGACAGAGAGATAGA  
AGCCACCAAGACTCTCGTGGAGAGCGGGGCACTGAAAGATATGCGGACCTTTGTGCG  
AACAGCTGAAGCGGAAGTTGTGAGAACAAGTGGAAGTGCAACGCGCTCCACCTAATCG  
GTGATAGGGTCAGTCGGTTAAAGAAGACAAAATTGGCGTTCACAGCGACGGCAACG  
CGGCATCTTTCGCGATCACCTTTTCCTCATCCCTTCCTTTTTCTACTTCATTTTGTTC  
CTTCGTTTCCTCTCTCTTTTTCTCAAACCTCTGACGCAATTCATTCGTTTATTTTATATATT  
TTCTTCTCTTAGTTATCGATAGAGAGAAAAAATCTCGTCTTTTATTTTC  
GATTGAAACTTTTGTATAATGATACGCAATTAATGTTGGAAGAATAATGCAAATGAG  
AATTCGCCGTATAGAAGCCGCGTCGCGTTTCCCTTACAATAATAAAGAAATCGTCGCTGG  
AGCAACAGCGGAAGAAAGAAATTTGAAAAATCGGTTAGATTGTGTTCCAAGTGATATA  
TATATCGAGTGATATGGAACGCATGAAAGTGTACGTAAGCTAGCAAGAAGATAAAAG  
CGGCGAAAGAGAAAAGAAGAGAAAAGAGGTAGCGTAGAGAAAAACGAACAACACG  
CAACAACGAAGAAACGAAGAGAAGACAGTAGTAGTAGTGTAAGGAAACAGAGATG  
ATAAAGAAAAAATCTACGGAAGGGAATAGCTTGTGAGAAGAAAAGCAAAAAGTT  
TGCGCGACGTACAGTATAATGTGGAGTAGCGTGTTTCGCGAAAGTTTTTAAAGTCGAT  
ATAGAATTTATAAATAGATCGGTTGGTATACTCACATATGTGCACGCGTACGCATGTGTG  
CGTGATTACGCGCGCACATGTACGTGATTTTCACTCGAGACTGAAGCGGTGAATTATTC  
TCGCACGGATCGACTACTCGTGGGGGAAATTCGAGATCCGGCTTACCTTCCACAGCTG  
ACGTCAATTACCGTACACAATGCGCTAGGAGTGATGGAGACAGTGAGCAAGCAAGTCCA  
GGTAGTAAGCGGACTGGGGGTGGGGGTCCGGTGGGCCCTGTGGGTCCAGTGGGGGC  
AGATTTGCATCACCATCATCATCCTCACCCCCACTCCCATCCTCCACACCCACACGCC  
ACCCCCACGGTCATCCTCACGGACCCCATGGCCACTCACTGGTCGGTGTAACGTGAC  
CCCTGGCAGGGTTCAGACACAACCACCGGTCTCGCATAACCAGCATTACCCGCGAGG  
TCTACTCCGGTACAGCTGCATAG

>novel\_circ\_000054

GAATACTGCCGGGACTATTGCCGTTGCTGCCATTATCACTACACAAAAATATAAGAAGA

ATGATATCCAAAGATAAAATGCTTCGATAGATGAAGTAATTTGCGCAACAACATAAAAA  
GATTAGAAAGAAACAGAATTATTAATTTCAAATGTATGTATTATTAGAAAGTTTGTATTA  
AAAAACGAATGGAAACGAAACGAAATAAATACATAAAGGAAGCAGAAGAAGATTAAT  
GATAGTGAAAGAAACAATAGAATGATATATACTTTAAGAAGAAAAGAATATTGATTGA  
ATATTTTTCGCACGACCAGTTTTTGTGATGATTCGCAAATGTGCGTATGTGTGTACGTGAT  
TGTGTATACGTTAAAACTGTGCGCGTATGTTTCTCGTTCTGCCATCTTGAAAGTCATCCA  
ATTTCTTTCTCTTGGTGGCGCTGGCTCACGTGTGCGGGAAGCGTGCACGGTGC GTGCA  
TCGTACACGCACTGTGCTAAGTTGCTAATAAACGAAGAAATCTCATTTTGAAAATAACT  
GCAAAACAAAGATTTATCGATAGCGATATAGTAAAACTGCGCGATGAAAGCGAGTTTGT  
CGATAAATTTATTTCTTTGTGGGAGTGATAACGAGTGTCTTAACAATATTAATAGTGAGA  
GCAGTATCGGTAGCAACAACAATCTCGGCAACAGTACACATGACATTAGTAACAGTAA  
GAAAAACGGATATGACAATGGTTTTAACAGCAACAAGAAATCACAAGTGGAATATAAT  
GTGCAAGTTAAGTGTAAGCCATATGGCAATGATGAGCAGTTGCATTTCTGTGAGGTGTA  
CTCGTACTGATTGTGAGTGCTAGTAGAGAAAGAGAAAGCGGGAGACAGAGAGATAGA  
AGCCACCAAGACTCTCGTGGAGAGCGGGGCACTGAAAGATATGCGGACCTTTGTGCG  
AACAGCTGAAGCGGAAGTTGTGAGAACAAAGTGAGTGCAACGCGCTCCACCTAATCG  
GTGATAGGGTCAGTCGGTTAAAGAAGACAAAATTGGCGTTCACAGCGACGGCAACG  
CGGCATCTTTCGCGATCACCTTTTCCTCATCCCTTCCTTTTTCTACTTCATTTTGTTC  
CTTCGTTTTCTCTCTCTTTTTCTCAAACCTCTGACGCAATTCATTCGTTTATTTTATATATT  
TTCTTCTCTTAGTTATCGATAGAGAGAAAAAATCTCGTCTTTTATTTTC  
GATTGAACTTTTGTATAATGATACGCAATTAAAATGTTGGAAGAATAATGCAAATGAG  
AATTCGCCGTATAGAAGCCGCGTCGCGTTTCCTTACAATAATAAGAAATCGTCGCTGG  
AGCAACAGCGGAAGAAAGAAATTTGAAAATCGGTTAGATTGTGTTCCAAGTGATAA  
TATATCGAGTGATATGGAACGCATGAAAGTGACGTAAGCTAGCAAGAAGATAAAAAG  
CGGCGAAAGAGAAAAGAAGAGAAAAGAGGTAGCGTAGAGAAAACGAACAACACG  
CAACAACGAAGAAACGAAGAGAAGACAGTAGTAGTGTAAGGAAACAGAGATG  
ATAAAGAAAAAATCTACGGAAGGGAATAGCTTGTGAGAAGAAAAGCAAAAGTT  
TGCGCGACGTACAGTATAATGTGGAGTAGCGTGTTTCGCGAAAGTTTTTAAAGTCGAT  
ATAGAATTTATAAATAGATCGGTTGGTATACTCACATATGTGCACGCGTACGCATGTGTG  
CGTGATTACGCGCGCACATGTACGTGATTTTCACTCGAGACTGAAGCGGTGAATTATTC  
TCGCACGGATCGACTACTCGTGGGGGAAATTCGAGATCCGGCTTACCTTCCACAGCTG  
ACGTCATTACCG

>novel\_circ\_000055

ATAAAATACATTCGTATATGATGGCGTCCGCGAAAAGAAAGCAAGACGAGAAGAATTT  
GAAAATATTACGCGAACTGGTTTCGCAATCTGGTAATAAAGAATGTTTTGACTGCCATC  
AACGAGGCCCAACTTACGTCAACATGACAATCGGTTTCATTCGTCTGTACCTCTTGTTC  
GGTATGCTACGAGGTTTAACACCACCACATAGAGTAAAGTCTATTTCTATGGCAACATTT  
ACACAAGAGGAAATAGATTTTATAAAGGAACGTGGTAATGAATATTGCAGAAGAATATG  
GTTAGGCTTGATGAATCAAATTCATCTCAAATTTAGATACAAAAGATGAACAAAAA  
TGAAAGATTTAATGAGTGCAAATATGAACTTAAAGATATTATTTGGATCCATCCATGG  
CAAATCAAACCTCAAATCAAAGTCACAATCATC

>novel\_circ\_000056

ATGATATGATTAAAGAATTAAGTACAAGTTTATGGGGTGTGAAAAATGAGCAAGAATAT  
ATGCAGGTTAGAGATCGAAATCATAGAGCTATTAGTGAAAGCACAAATTCTCGTGTAGT  
TATGTGGGCATTTTTTGAAGCTATGGTTTTGGTTTGTATGACAATAGGACAAATTTTCTA  
TTTAAAACGATTTTTTGAAGTCAGAAGAGTTGTCTAATTAAAGATATACAATAAAATAAT  
ACATTGTACATTCACATTCATTGTACATTTTTTAT

>novel\_circ\_000057

AATTATCAGTAAATGCGTCCACACAACAATCGGAAGTAATAGCGAGGTTACTGCCTATC  
AACGGGAACCCCGAGATCACAGGATGCAAAGATCGACCTCATATTTGTGGAAAAGAA  
GCGGCATGTCGTAGCTTTAAAGACAACACATCCAAATGCGTCTGTCCGCACGATCTATC  
CCCACCTACAACAGATTTGAAATGTCCAAACCGTCTAATAGTTCCCCTAACACCTCGAC  
CTATACCCAACATAATCCCTCCAAATGGTAATTCTACCAACAGCACGACTGCTCTTCCA  
GAAGCAGAACAGTATTTTCATACTGTTCAACAGGCAGAGCGTGTGAGACAAAAGGTAC  
CTGAAATAATAGGAATCACCATAGCATTTCGTGCGGTATTAGCAATATTGTTGAGTATAG  
TCTACTGCGTGAAGAAAAGAAGTTATAACGTGAAATCGCAGAGGAATTCCCTGGATGG  
AACACCGATGAATCTGAAAAAGGGATTGCTGCTAGCGAATAAGTACACACCTAACCCA  
CAGTATTTTCAGTTGCGCCTCGCCGGAAGTGTCGATTCTGCAACGTGAGTCTCTTGCATT  
TTTGCAAGAAATTGGCGAAGGGTGTTTTGGAAAAGTATACAAAGGAGAATTATGCATA  
GGGGATTTCGAAAGAGATCGTCGCTATAAAAGTTTTGAAAGAGACTGCACCGCGAGAA  
GCTGAAGAAGATTTTATGCGAGAAGTCGACATCATGTCCACATTTGGGCATAGAAATAT  
TTTGTGCTTGAAGGGTGCAAGTTCGTGAAGGTAATAGTAGTCCATGGATGGTTTTTCG  
AATACATGCCGTATGGAGATCTCGCTGAAGTTTTACGATCGAACTCTCGACAATTTAATA  
GATCGCCGAAACCTGAGATGCAACCTTTAACTGAGGAATCTTTACATTGGATAACAATC  
CAAATTGCAGCTGGTATGACATATTTATCGGGTCAAAGATTCGTTTCATAGAGATTTGGCA  
TGTAGAAATTGTCTAGTTGGTTATGATTTTCATTGTTAAAATAGCAGATTTTGGGATGTCA  
AGAGATGTTTATACTTGCGATTACTATAAGATAAAGGGCTCTAGACTTTTACCAATCCGT  
TGGATGTCACCGGAAAGTGTAATGTACGGGCGATTACATTGGAAAGTGACGTATGGA  
GTTTTGGCGTTGTTCTATGGGAAGTCTATTCCTTTGGCAAACAACCATATTATGGACATA  
ATAATGAAGAA

>novel\_circ\_000058

ATTGCAATATGATTATAAATAAAGAATGTTAAATGATTTTGTATTAGATCTTTTCCAGATA  
CTCGTAAATCTACTGGATACCAATAATTAAATTCACGTCGCATATGATCTAATGCCTCTTT  
CTTTATTTTTGTTTTGGGAAACTTCGTATCTTTAAAAAAATATAATCCCATACTTCAGAT  
GTCATTTTCATCAGGCCTAAATATAAAATATTCTATATGTAAAATATTTTGCATTAATAAAA  
ATAATTTAACTAATTTAATAAGAAATTAATTTTACAGCAAATAATTGCACAATTAATAATT  
ATTTAAAATTTGACTTTGAAATTTTACTTTATGTTATAAGTATTTGGTTTATCGCCTTTAAA  
TGTTCCCTCCTTGTAATAAATGCGCCACAGTATAATAAGCCATATAAATTGTTGAATCTGA  
GAGTGATTCTATTAACCAATTTTCATCCCATGGTAATTTAGTACCTGGAATTTATATCTAT  
AAAAATATATGATACAAAAATTGTCATATCTTTATTTAATCATTATCTTACCAAGTCCGT  
AAGTTCTTGAACATGCATACTCATGTAACCAATTAAGACAAGCCATAAAATTTTTTCTC  
ACTTCATCATGAAAAGTATTAAGGTTATTTAAGGCTTCTATTGCTTCTTTTTTCCAAGTTT  
CTTCTCCATAGTCTAAATACCATTGATTACATAAGGCTACTACACATTCATCATTTGATCT  
TGAAATTATA



>novel\_circ\_000059

GATTCTACGCTAGAGGAGAAGAATCGTCGACTTCGTTTTCTCGATGATCGACATCAATT  
CGAGTGCAATAATCGAAGCTTCGAGATGAAAAATGGACGACAGTCGCGCAAGTGTGTT  
TCGTTTACGTTTCTTCAATTCGTTTCGTGGTCGATGAAACGAGTAAGTGAATCGGATATAT  
TCGGTTATTAAAGAAACGGAGGACCAATAAGAGAACAGTGTACATAACGCGTGTGAAAT  
GGATGGTACGCCAAAGAAAATCGAAGCAGTGTTAATATATGGATGCCCATGGGTGGAAT  
TTGGCCGAAATGTGCCAGCGTTACCATCACGCTGTACCGGCAGCTCAAAATTCTTCGCC  
AGCTAGGGATCCCTCAGCTGCCATTGTGCAAGGCTTGTCAACGGCTACGCACATCGAT  
CAGGCTAGCCCTTCTTATTCCCATTACACGATGCTGGATAATTATGACAGGGGTGAGGT  
GACACCACCGCCAGTGAGCAGTTATGGCGGTTCCCCTGGACTCTTGGCACTTCATTCT  
CGCTTTATGCGACACCTACGTCGAGGGCCTACGATATCGAGTCGAACATCGATGGCAAC  
GACAGTTCCATGCCCATCGATACCCAAATCATCTCGATACCGGGAATGTTGAGCGGCCC  
AGCGCAGCAGCGGTTGGAGGACATGTCCTGGCTCGCCTCCGGCCCCGTCGTTGGAGTAT  
CAGCAAGGCATCTCGCCGATTCCCGCGGGAGTGAAGATGTGCCATCCAGGCAGCACG  
GCCAGAGGAGCCTGAAGGAGCAGCGGATACGTCGCCCAGTGAACGCGTTCATGGTC  
TGGGCAAAGGTCGAGCGCAAAAAATTGGCCGACGAGAATCCTGATCTCCACAACGCC  
GATCTCAGTAAGATGCTCG

>novel\_circ\_000060

ATCCACGAACACATGACAAGGGAAGAGATGTTATCGGTATTTACACAGGACACGAGT  
CTGTACCAATGTACGAGATTGTGCCTGTGTTGCATTTCGGTGCACAAAAGGAGTACAAG  
GGAGCCGGAGATACACTTGAAGGCCTTCGGGAAGGACATCAGTCTGTCGCTAAAGCCT  
ACGGAAGGGTTGCTCAGAGGAAATCATTTGCCCATGTGGACCGTCACGAAGAATGCGT  
CGCAACCTGATGGCCTCCACTACGAGAAGGTGACGAAT

>novel\_circ\_000061

CATATCTGGGAAAAACTGTCAGTAATGCCGTGATCACTGTACCTGCTTACTTCAACGAC  
TCGCAGCGTCAGGCAACTAAGGACGCTGGTACCATCTCGGGCTTAAATGTTTTACGTAT  
TATTAACGAGCCCACCGCTGCTGCCATTGCTTATGGCTTGGATAAAAAAACTACCAGCG  
AACGCAACGTCCTTATCTTTGATCTTGGTGGTGGCACCTTTGATGTCTCAATTCTGACCA  
TTGAAGATGGCATTTCGAGGTCAAGTCAACAGCAGGAGATACCCATCTTGGCGGCGA  
AGATTTTGATAACCGTATGGTTAATCACTTTGTACAAGAATTCAAACGGAAATATAAAA  
AAGATTTAACTGCAAATAAACGCGCTCTTCGTCGTTTGAGAACAGCTTGTGAGCGTGC  
GAAACGCACTCTGTCTTCGTCTACTCAAGCTAGCATTGAAATTGATTCGCTCTATGAGG  
GAATCGATTTTATACATCGATCACCAGAGCTCGATTTGAAGAACTCTGTGCTGATCTCT  
TCAGAGGAACACTCGAGCCAGTAGAAAAATCATTACGCGATGCTAAATGGATAAAGC  
TCAGATTCACGATATCGTTCTGGTTGGTGGATCCACGCGAATTCCTAAGATTCAAAAAC  
TTCTGCAAGACTTCTTCAATGGAAAGGAATTGAATAAATCTATCAATCCTGATGAGGCT  
GTGGCATATGGAGCTGCTGTGCAAGCTGCCATTCTTCATGGTGATAAATCTGAAGAAGT  
ACAAGATCTATTACTTCTTGATGTAACACCTCTATCTTGGTATTGAACTGCTGGTGG  
TGTTATGACTGCTCTTATTAAGAGAAATACTACCATTCCAACAAAGCAAACCTCAAACCT  
TCACTACATATGCTGATAATCAACCAGGTGTATTGATTCAAGTCTATGAAGGAGAACGT  
GCTATGACGAAAGATAACAATCTGTTAGGTAAATTTGAGCTCAGCGGCATTCTCCAGC

TCCTCGAGGAGTTCCTCAAATTGAAGTCACCTTTGATATCGATGCCAATGGTATTCTCAA  
TGTCTCTGCAGTTGATAAATCTACTGGTAAAGAGAACAAAATCACTATTACCAACGATA  
AAGGTCGTCTCAGCAAAGAAGATATCGAAAGGATGGTCAACGAAGCTGAGAAATATC  
GTAGCGAAGACGAAAAACAAAAAGAACTATCGCTGCTAAGAATGGTCTTGAGTCTTA  
CTGCTTCAACATGAAGA

>novel\_circ\_000063

ATTCTTTAATTTCTAACTCTATTTCTTTGATTTTCTGTTCTTGAATTTCTGGCTCTTTAATT  
TCTGATTCTTTTATTTCTGGTTCCTTTAATTTCTGATTCTTTCATTTCTGGTTCTTTAATTTCT  
TGGTTCTTTTAATTCTGGTTCCTTTAATTTCTGGTTCCTTTAATTTCTG

>novel\_circ\_000064

GCAATGTCCAGCAAGTTTACAAGCATATTTAGTTCATCAAGTGATACAAGAAATTAAAT  
CTATGTGCAAAAAACAACCAGAAGATTGTGGATTTAAATCCCAAGAAAAAACATATAC  
TTCATTAAAATTAATGCAAGCTATTATTAATAAAGTTAATGAAATTTGTACCCGTTATCTG  
GACAATAGTAGATTGGCATTATTACCACCTCCTCCTTCAACTCCATTACCACAAATAACA  
GCAGGTGGAAGCAAAAATTGTAGAAGAAAAATGGAAGACCGTTATGTGATTTTACATG  
ACTTACATACTACGTTTGGTATTGAGGATGATTCTATAGCAAATTATTATGCAGTATTTGA  
TGGACATGCAGGACAAGATGCAGCTGTATATTGTGCTGCTCATCTACATCAATATTTAAC  
AGAAAGCATATATTATCCTACAGATCCAGAGCGTGCCTTACGCGATGCTTTTCTTACTAC  
AGACAGACAATTTATAGAAAAATCAAAGACACAAAACTATGTGGTGGGACTACTGCA  
GTTTGCACTTTAATATTAATAAAAGATTATATGTTGCCTGGGTAGGAGATTCAACAGCC  
ATGCTGATAAAACGTGATAGTGTTGTTTCAGCTAGTGAATCCTCATCGACTTCATCGCGA  
AGATGAAGTGCAAAGGATACGAAAAGCAGGAGGAGTAGTGATGCCAAGTATGGGAAC  
AATGCGTGTAATGGAGTATTAGGTGTTTCAAGGGCAATAG

>novel\_circ\_000065

CCTGAGAACCGAGCAACCGAGTGGCCTCGACACGGGCGGCGTACGCTTCGAGCTGAG  
CAGGGCTCTCGATCTGTGGGCGAGGAACTCGAACTCACCTTTCAGGAAGTTAACAGC  
GACAGAGCGGATATTCTGGTTTACTTTCATCGTGTTATCATGGAGATGGATATCCATTC  
GATGGCAGAGGCCAAATTCTAGCACACGCATTCTTTCCTGGCAGAGATCGAGGAGGAG  
ACGTACATTTTGATGAAGAAGAAATATGGTTGTTGCAGGGCGACAACAATGAAGAAG

>novel\_circ\_000066

CAAAATTATCTCATGAAATTCGGATATCTACCCCAGTCGGATCTAGAGACCGGAAACCT  
TAGAACGGACGATCAGCTTACGGACGCCATTAAAAATTTACAGATGATGAGGAATGTC  
GACAAAGATTTCGGTGGCATTCTGTAACTGGTGATATCGACGAAGCTACTATGAAATTA  
ATGAGGCTTCCGCGGTGCGGACTTCCGGATAAAGTAGATCCTAGATACACTAGGGGTCA  
GGCATAAACGGTACACGATCCATGGGCAACAATGGCCACATCGGAATCTCACTTGGAG

>novel\_circ\_000067

GAAGATTTTACCTACACCAGGTAAATCATGAATAACCGGAACACCAACAGCATTCAAT  
TCTTCCCGAGGACCGATACCACTGTTCAAAAGTATTTGTGGTGAATTAACGGCACCTAA  
ATAACAAAAATATTACGCATATTTATGTAATATTTTAATCATAAATAAAAAAACTACTTT

TGTTAATAATTAATATTGAGAAAGAACTCATTGTATATATTTATATATACATTTCCATTATT  
ACAATTATAATTATTTATGATATATTTAGCTATATTAATTACAAGTTTTAATATTAAGTCTGT  
TTTCTAGTAATAGAAATAAATATAGTATTCGCGTATTTACAAATCATTCTATGTAATTATC  
CAACTGTATTTTACAAAAAGAAATCGCAATTTGAACAGGATATGGTCATTGATCGATCG  
CACAAAAGAATAATAATATCAAAGGACTGACTAATCAGAAAAATATGTACATAGAATAA  
AAGCTTAAAAACGACCTTGTAACATAATATAATTATCAATGAGTCCTTTCTAACCTCAT  
CAACAATATATTAACCAAATGTCCTCTTCCGTAGCAATTTTTATTTTCCTTTGTATTCCGAA  
AGGCACACAATTTCTATTATTCGCGTGATTATAGTTATAAATCACTATGAATCATGAGTCA  
TTTTGATGATAAATAATTATTTTAAAATTATTCTATGATTGTCTAAGGACATTCAATATTTT  
TCAATATTTTTGATAAGTTGACTTATAATAATTATATAAAAATATTAATGTTTTTATATTTTA  
TTTTTTATATGTATTAATGTAATATTATAATTATAATTATCATGTTAATAATTTTTATAAATTA  
TACGAACGTAAAATGCTATATAATTAAATCTTAATAAAAAAAGTTAATAATAATAATAA  
AAGTTAATAAAATAAAATAAAAGTTATTGATTTTAAATATTGGATATTATATACTTTTACATA  
AATTACTATTAAAAATATGAAGAATTTTTTAAATACGAATAAATATTGTTTACCAATTA  
TGAATGTAGGTTATAGAAATATAGAAATGTAGATTGTTTATGAAATATACGGACTAGCAA  
ACTAAAATTGGAAATGAAAAATTAGATTTCCATGTATGATCATGCAATTTAATGGTATAA  
CATAAACCATACAATCATATGAAAACTAATAAACCATGAAAATTGATTATTCAAATACT  
TTGATAATGAGTATTTTTTCTGTGAGAGAAAATTATTTGTTCTTTCTCAATAGTGCAATT  
TATTTCTTCTACTTTTCCTTTTTTGATGGGTCTGAAATTTGATTGACAGCTATCATGACAT  
ACGTTAGATGATATTACATGATGTTTAAATTATTTTTGATATATTTTTGATATATGTATTTAC  
ATTTTAATGCATTATCAATTACAACATATATTAATATACATATATTTATTTTTTCAAATATAAT  
AATTTTAAATTAATATGTAAATTTTTGAAGAATTTTTTAAATTTATTTTATATTTGTTTTT  
TTTAAATTGTTTGTATATAGAAATGCAATTAAATAATTTATTTATTATTATAATTTATTATT  
AATTATTTATAAATTATTATTATTAATAATTTATTTATTTATTATTCTGAAGTCTAATTA  
GTAAAGAAATTTATTTAAATTACTTCATGAATATGAAATCATTAATGAATATAAATTTAT  
GTAAAAAATATATTATAAAGTATAATAATACTATTATAGAACATAAAATAATAATAAAT  
AAAAATATAAATTTATATTTAAAATGTGTATAATTCTACTGTGTTTAAAATTATCTATTATT  
ATCATAATATTTAAATGTCAATCAATTAATTTAAATATTTTTATTTATTATACAATATTTCTT  
CATGTTATATTACAAATAAAAATCAGTTTTTTGTATCAATGTAAATTAATGCATATCTTAG  
CAATATGATATAAATGCATGTTTAAACATTGAACATGATAAGTTCAATCTTAATATAAACTT  
ACTAACTATTATAATCTAATAATCTAATATAATCTTGTAAGAAATCATTATCCATTTTTTA  
TTTAAAAAATACATCAATATTGCAAATAGTTCTATATAATAAAAAGAAATATTCATTGAT  
AAAATCTATCGTTATTTATTACAGTTATTTATAGATATTTATGCAAATATTTCCAATTTTTTC  
TTTTAATAGAAATATAAAATGATTTGTAAATGATTTAAAACGTTTTAAATCGAATTATAAA  
ATGAAACGATTTTAAAATTTCAATTTATGTAAATAAATTTCACTTGTAATAAAGAATAA  
TCCAAATCAGAATAATTTGAAAAAATAAATAAGCTAAAATTCAAATCACAAAAAT  
AACACCTAACAAGCATAATATCTTATAAATATTAAATAATTCGGTTTAAGTTCGAATCTG  
CAAACAAATGGTTTTTTAAAATGCACAATCTTTCTTTATTTCTCTAACTGAGAATAATGA  
AGACAAATTGTGCAATAAAAAATCGTTCATATGCATTCTTAAATTTATATTATCTTTGTAC  
AGAATTTTACAGCAAAGAAAGAAAAAGCAAAGAAAGTACTGCTTTATATTTAACTTT  
ACTTGATATTGAAATATTAATATTAATAAATAACCTCCACTTATGACTACTTCTTTAGCC  
ACAGAGACTCGATGGATCTTTCCATCATGAACAAATTCTACACCAACTGCCCTTTGT  
GTTGTCAAACAATATTCTAGTGGCCGTGGAGTTGAGCATTATATGAAGATTTGGACGAT  
TTTTAGCTGGTCGTAAAAATGCCCGGGCAGTGGAAGTCGTGAACCATTCTGGAGGT

CGTTTGGGCTATAGCGAATCCAGTGTGAGTTCGTCCATTTAGATCCGCGATACCATAACC  
TGTAATAATTTGGAGAAATATTACAATTAAATTTAATTCAAAATTGAAATTTAAAGAAA  
AGATTTACAATAATATAAAGATTTCGAATCCAAATCCTTTGAGAGATCTCAAAAGAATTG  
AAATTTAAAACCTTTAGAATAATTTTTTTTTCTTATAAGTATTCTCATCAATTTTTTTTATTA  
AAATTTAAAATTTTAATAAGTTAAATTGTTTGTCTGCGTTGGAATTCGGAATCGATTAC  
ATACATCGATGAAATGCTAGTATTATTTGTAAATTAGTATAACAAGGTCGATACGCGTTC  
ATTCATCATCAAAATGATGTATTATTATTGGGAACAAAAGCCAACAGTGAACACAATGT  
CGCAATTAGCAGAAGTGATCGAATTACATAACTAGTTTTTCGATGAATATATCGAAACG  
AGTCATTAGACTCATGCGAGCAATAACAACGATGTAAAGAAGAAACGAGTTCCTCGAC  
GTCTCGTAATAACAGGTTAAATGCAATTCGAGTTAAGTAGAACGACTTGTTGTTACTAA  
AGTATTTTCCACTTTTTTCCCCAACTTTCTCGCGTATTTATTTTTTATTGCAACCGGAATAC  
TTATAATGAATATTA AAAAGAAGTTGTTTTGAACAGAATTTTACCAAGCCATTACTTAAT  
TGGTAATCTTCTTTTGAGAGAAATGATTATCCTTTTTAGAATCGAATTCCTTTTAGGAAGT  
ATCAGGAAAATTCCTTTTACCATTAAATTA AAAACGTAACAGATATATCTTAATATCTTAA  
TATTAAACGTTAGTATTAATTAGATGTCAGTTTGTCTAAAAAACAGAAAATTAATCCAAT  
TAGTTTGTGCATGTACTGATAATTTGTTTAATCATTGATAAATAAAAAAAAAAATTA AAAA  
TAAATTTACCAAGTTCTTTTCCAGCTTCGAGAATAGAATAACTCAAGGGCGGATGATAA  
GGGAAC TGCGTGACCGTGAGTGGCCCAACACCGTGATAACCATAATCCATGGTGT  
TTGCTTGAAGATTATCCTCGCTCCTGATGAAATATGGAAGGACGTCTTGATAAGACCAT  
CCTATGTTACCTAGCCTCGCCCAGTCGTCGTAATCCTTTTCGCGAGCCCCCTTATATACATC  
ATGCCATT CATAACGCTGGTTCCACCCAGAACCTAAATAATTTTTAATTATCCATTCGTT  
TGCTTTCTGTGCGGCTATTCTTGTACGTTATTACGGCAACAGTTGAAAGAGGATTATATGA  
AATATAATACGGAATAATTAATAGTAATAATTAGAGTTGAAATAAATAAAAAAAAAATAA  
ATGAAATAATAATAATAAATAATATTGCAATTTACCTAATTTAAATATTTTAAATAAGTAAT  
AAATAAGTTTTTTGTTTCTTTTAATGTGTTCTTCATAATTAATGATTTTATATGTTTGTACA  
TTTTTTGTTTTATACATGTTTTTACAGCTGCTATAAAAAATAAATATTTTTTTTTTATTGAT  
AATTCATTTATTTTTTTTTTATTAATTATATATATATGAAATATCATATTGATTAAATGATAATT  
TGTAAGTGTCTCTTAATATTTTTACGTATTTCTTTTATTAATTTTTTGACGAAATTATTAT  
TTCCAAATAAAGTGTACACATACTTTCCCCCTGGGCCAATAACATTTTCGATCATCTTTA  
TTTAGAC

>novel\_circ\_000068

GCTTTTCGTGCGGAATCACGCGTACTAAAATAATCATTA AAAATATTGATAAGGGTTAGAT  
AATTAGAATCAAACATCGTCAACGTCGATCACCGTTGCGATATAAAAAAAAAAACATAAC  
TATCGACAGTGAAGATGGGAAACAAATAAAGAAAGACTTAAGAAAAATGCTCGAAAA  
ATGCTCGAAACATAGAACACAGCAGCGTCTGTATAATTGTACATTTGACAGGGAAGAAT  
TTAAATTTAAAATCGGATGGATTCAATTTAATCTATTGCTATTGAAAATTTATATGTTTA  
TACGTGTTTTTTAAAATTATATTTTAACGATCGAAATGAATTTTAACGA

>novel\_circ\_000069

TCGAGCTAAAGAATTGGTATTATCAATTGTAAATCAAAGAAGTAGAACTGAAGGAATTG  
GCGATATGAGTGGAAGCAGTGGAGGAATGATGGGTCATCCAGGATTTGTTGAAATAAT  
GATTCCTGGACCAAAAAGTTGGTTTAATTATTGGA AAAAGGAGGAGAAACAATAAAACAA  
CTTCAAGAAAAATCTGGAGCAAAAATGGTTGTTATACAAGAAGGCCCTTCTCAAGAAC

AAGAAAAACCTTTAAGGATAACTGGTGATCCTCAAAAAGTTGAATATGCCAAACAATT  
AGTATATGAATTAATAGCTGAAAAAGAAATGCAAATGTTTCATAGAGGTTCAAGAGGGA  
GTGATAGGAGTGGAATTATTCAAATGATAGTAATTTAATCATGGTTCTGGAACACTG  
ATGGAGTAGAGGTACTTGTTCGAAGAGCTGCTGTAGGTGTTGTTATTGGTAAGGGAGG  
AGATATGATTAAAAAATAACAAGCAGAACTGGAGCAAGAGTTCAATTTCAACAAGGA  
CGAGAAGATGGTCCTGGGGATAGAAAATGTATAGTATCTGGAAAGCATCAAGCTGTAG  
AACAAGTGCGTCAACGTATTCAAGAACTTATTGATAGTGTAATGAGAAGAGATGATGGT  
AGAAGTAATATGGGAACAAGAAGTGGTCCAAGAGGCAATGGATTAGCAATAATCGAA  
ATCCAAATGAATATGGTGGATGGGATAGACGTCAAGGAGGTCCTATGCAAGATAAAATA  
GAAACGACATTCACTGTTCCATCTTCAAAATGTGGTATCATTATTGGAAAAGGTGGTGA  
AACCATTAAACAAATTAATCAGCAGACTGGAGCACATTGTGAATTAGATAGAAGAAAT  
CAAAGTAATGAAAATGAGAAAATTTTCATAATTCGTGGAAATCCCGAACAAGTGGAAC  
ATGCAAAAAGAATATTTAGTGAAAAATTAGGCATGGCTCCGGCTAATACTTCATTTACT  
GGTACACAAGGAGCAATTGGATATAATCCAACATGGAATGCAGGAACAGCTTATCAAG  
CATGGCCAAGTCAACCTCAATCTACTGATACAAATACTGCAAGTCAAACACCTGTTCAA  
GTAAATCCACAAACGGGACAACCGGATTATAGTGCACAATGGGCAGAATATTATAGATC  
ACTAGGTATGCATAGAGAAGCAGATATGATTGAACAACAAGCAAAAACAAGGAAAACA  
AGATCATAATCAACAATCAGGAAATACACAGAATCAATCTAATACATCAACACCTAATG  
CTGCTGGATCTACCCAACAACAACAACAACAACAACAACAACAACAGACAGGAG  
CAACACAGAATGGCGGTCAAGCCGATTATAGTGCACAATGGGCAGAGTATTATAGAAG  
TATTGGTAAAATAAAAGAAGCAGAAGCTATAGAAGCTCAAATGAAAGCAGGCAAGTTG  
GGGATACAAAACAATCAAATTGCTCAACAACAATACAACAAGTATACAAAGTCAAT  
CCGGTCCAACAAGTGGGACTCCTAATACATTTCCACAACTTATGGTAGTTATCCAACA  
ATAAATGCTAGTTCAACTCCTACGGGTTATTATGCAGCAGGAGCTGGATCTACCACACA  
GCCACAACTGGTCAACAAAATCCGTCTTTCCCAACGGGCTATCAGAACTATCCTTATT  
CACAAACGAATACAGAAAGTTAACTTCCATCAGGAAAAATATTAGCT

>novel\_circ\_000070

GTGGTAACCGAACGGAAAATACAAATACATCAAATACTACTTCAAGGTCATCGAGTTTA  
CAACAACGAGGGTCAAAAGGTGCTGGACTAGTAAAAATGGGGAATCGGCAGTCCAG  
GCATCTATTAATCGTAAAGAAGATTTTCGAATGCGACAAATGCTCGTGAATGGATACGA  
TCTCAATACGAAAGAAACAAATGATATTACAGGTGTGAGTTCACCTGATGAAAGTACA  
ACAGTTGCTCCTGATAGCCCATGCTCTCCGGCTGAAACAAGCACATCAGCATCATCACA  
CGAACAACAAGAACAGGAACAACAGCAGCAACTTTACGAACATCACCATTCTCAATTT  
CAACAACAGCAGCAACGTACGACCGGAAGTGCGCCAGCCGCTGCACTGCACGTTGCT  
GAGGACAGTGGAGCCCCCTGTGAGATGCGGAGGACACCACCGCAAAATAAAG

>novel\_circ\_000071

ATTACCGTAACACGATCGGATACGGTGATACCGTCCCACAAACGTGGATGGGAAAAAT  
AGTCGCCTCGTGTTTCAGCGTATTTCGCTATATCCTTTTTTCGCACTTCCAGCCGGAATATT  
GGGCTCCGGTTTCGCGTTGAAGGTGCAGCAAAAGCAACGGCAGAAACACTTCAATAG  
GCAGATACCTGCCGCGGCAATGTTGATACAGTGCCTGTGGAGGTGTTACGCCGCTGAC  
AAAGCCATCAACAGCGTGGCCACGTGGAACATTTACATCAAGGATCCGGCACCGGCCG  
GCCAACCCTCCACGCCATTGGGAAAG

>novel\_circ\_000072

GAGAAAGTTAATACTTCACCAACGGGTATAGTACAGCAGCCGCACCAGCTGCACTTAC  
CGATCAACGCTCAGATATTGAACACGAGTCAAGGTTTACCAACTATCGTCCCAACGCTT  
CAACACATCGGGCCGAGTTTGAGGGTGATACCCGGTGACACAAGGCAACTTCTGGTTA  
CTCACACAGCTGGCAATAACGAGTCCAGGCCGCTCACGTTAGCTGTGCAAACTCGTC  
GGATCAATCGAGGCCGCTCATTGCCGTGCAATCGAACACTGGAAGTGAGCCAAGGCC  
GTAGCGCTGGTCGTTCACTCGTCCACGGCCAACGACAACAGGGTAACGATCGTGCAATT  
CTAATCTATCCAACAACGACAGGCCGTTGGCCCTAGCCGTGCAGTCGTCCGCCAATGA  
CGTCAGGCCAGTTACATTTGTGCACTCTGCAAACGAGGGAAGGCCGTTAGTTCTTGCT  
GCGCATTCTCCTGCATTGAATGTGTCAA

>novel\_circ\_000074

AGGAGGAGCCGTTGGAAAATAATAGGACGAATGGGAATCACACGGCGAGCTCCCGAG  
GTAGCCCCGTGATCTCGAGCACGCGAGTAACGCCACCCCTCGGCGAGCGCCAACCTCGG  
CTCATCTGACCGCCCTGCACTCCGCGTCGCACCACCACCACCACCTATCTCATCACCAA  
CAGCAGCAGCAACAACAACCGGCGCAGCAGCAACAACAGCAGCAACTGCAACACCA  
ACAACAGCAGCAACAACAACAACAGCAACAGCAGCAACATCACCATCACCATCA  
CCATCACAACAATCACAACAGTACCCATAATCCTTACGTGGAAAATCATAATTGCAATC  
ACGCGCAACAGAATGCTGGCAATCTCGTCGTCGACGTTGAACCGAGCCACGACAATAA  
GAAACATCGAAATGGACCGTGCGTAATCCGTTCTGGCACCAGAGAAGTGCATAACAAA  
TTGGAGAAAAATCGAAGGGCACACCTGAAAGAATGCTTCGAATTGTTGAAGAGACAG  
CTTCCCTCGCAAGAAGAGAAAAAATCCTCGAATCTTTCGATTCTTCATGCTGCGATCAG  
GCATATACAC

>novel\_circ\_000075

AGGAGGAGCCGTTGGAAAATAATAGGACGAATGGGAATCACACGGCGAGCTCCCGAG  
GTAGCCCCGTGATCTCGAGCACGCGAGTAACGCCACCCCTCGGCGAGCGCCAACCTCGG  
CTCATCTGACCGCCCTGCACTCCGCGTCGCACCACCACCACCACCTATCTCATCACCAA  
CAGCAGCAGCAACAACAACCGGCGCAGCAGCAACAACAGCAGCAACTGCAACACCA  
ACAACAGCAGCAACAACAACAACAGCAACAGCAGCAACATCACCATCACCATCA  
CCATCACAACAATCACAACAGTACCCATAATCCTTACGTGGAAAATCATAATTGCAATC  
ACGCGCAACAGAATGCTGGCAATCTCGTCGTCGACGTTGAACCGAGCCACGACAATAA  
GAAACATCGAAATGG

>novel\_circ\_000076

GTGAGGAAAATGCAAGACAGGGTGCAGAAGACGAAGGAAGAAGTTCAAAAGGCGAA  
AGAAAAGTACGAAGCGGCGTTGCAGGAGATTAATCAGTACAATCCTAAATACATGGAG  
GATATGACCCAGGTGTTTCGAAAAGTGTCAAGAGATGGAGGCGCAACGGTTACAGTTCT  
TCAAAGAGGTCCTATTTCGGCATTCTATAAATGCCTGAATATATCTCAGGATCCGATATTAC  
CACAAATATACGAAGAATTCTATCACACAATTAATAACGCGGATCATGAGAAAGATCTG  
AAATGGTGGTCGAACAACCATGGTGTAAACATGGCAATGAATTGGCCACAATTCGAGG  
ACTACACAGAGGAGTTTCGTGACATCGCCAAAGGCTCGAAGTCAAAGGAGGCACTTC  
CGGCTGGCTCCATCACGCTCATCAATCAACGTCCGGTCGGCGAAGATGTGCAT

>novel\_circ\_000077

GTGAAAGGAATTTCTCGACTTAGGCTAGGATGTCACATCACAGCGACGACAACATGCT  
GATAGCAACCTCGGACTCCTTCTGGGAGCCGGGTAAC TACAAACGAACGACCAAGAG  
GATCGAGGACGGGCACAAATTGTGCGACAGCTTGGTGA CTCTGGTCCAGGAAAGAGC  
GGAGATCGAGAAGAGTTACGCGAAAGCGTTGAAGAATTGGTCGAAAAATTGGAACGA  
CAAGATCGAGAAGGGGCCGGAATATGGAACCACCGAGGCTGCCTGGAAAGGTGTCCT  
CGTCGAGTCGGAAAGGCTGTGCGATCTTCATCTCAGGGTCAAGGAGAATCTCTGTAAC  
GACATCATTCAGCAGGTGAAAACGTGGCAGAAGGAAACGTATCACAATCGATGATGA  
CGCTGAAGGAACGGAAGGAGATGGAGGACGCGTTCAAGAAGGCGCAGAAACCGTGG  
GCGAAGCTTTTGCAAAGGTGGAAAAAGCGAAGTCCGAGTATCACAACAGTTGCAA  
ACCGAAAGGACAGCGGCCAACATGGAAAGGAACGCATCGGCGGACAGTTCGCTTTCC  
CCTGACCAG

>novel\_circ\_000078

AAAAAAAAAAAAAATTAACAAGAAATACACGTACACAACACGCGTAGTCTGTCCGCG  
CGAGGTTTATTTTAAAGACTACATCATTATATAATGATTACCATGTAATGATATTTAATTGA  
TAAGGTAACATATATTCTATACTCTTACACGCTAAGTACTCAATAAATATATCTATAAAATT  
TC

>novel\_circ\_000079

GGTGTGTTGTTGGACAATTCGGCGCCGCGGGGCCCGCCCGATGTGCCTCCGCGTAATCCT  
ACAATGAGTCGCGTCAACGGAAGATTGCCAGGAAGTCACGCAGCCAGCGACCACGAG  
CGTGATCCCGACCTCCAGCCATCCTGCCTCGTACGCACCTCGTCCGGCGGGCTTTTACAG  
TATACCAAAGATACCGAAGAATGAGTACAACAACAAGAACCAGTCCACGGGGAATAGT  
CCGATAAAGGTCGAGCTGCAGAACACATGGACAGGGTACCTCTGCCGTATGGCCACG  
CGTCTTCGATGATCCCGATGAGGAGGCAAAGCATTTCGTTGCCATTTTCGTGAAAGGGGT  
CGACTGGTGCAGCTGGAAATTGATCGCCATGATACTGCTTATGGTCTCGCTGTGCATAA  
CGGCGGCCCTAGCCTACGTCGTGGTGTGCGAGCATAGTGAACCGGTCGTACCAGGGCAC  
GAAAGCGTGC GCGGTACTGGTTAGCGAGAGCGCGGACAACACGAAGCCGTTGTCCTC  
GGACGGGAACAAGACCTCTTCGTCGGCGAGCGCCTCGTCGTCGCAGTCGAGCGGTG  
AACGCGGCAACAGGCATCCTCTGGAG

>novel\_circ\_000081

AAGCATCGGAACAGTGAGGAGGGCTCGGTGGCCACGAGCGTGACGATCGCCGAGGT  
CGTTGATTCGCAAGAGCAACAGCAACAGCAATCGAAGAGCAACGGCGCAGTATCTCG  
CCGTGTTGCTGGTCAAAACGTTGCGTTGAGCAACGGAAATAGTACCAGCAACGTCGGC  
CGTGTGACACCGCGAAGCCACATGGAGCAGGAGAAGCGTATGCGGCGAGAAATCGCC  
AACAGCAATGAACGACGTCGGATGCAGAGTATTAACGCCGGTTTCCAATCGCTGAGGA  
CGTTGCTGCCGCACCACGAGGGCGAGAACTTTCTAAG

>novel\_circ\_000082

GTAAGTTGAACGAGTGATCTAGAGGCATCTTTTAGCAATGAAATTACAGTTTAGTTTTA  
AATTTGTCAAGACACATGGACAAGGTGAGATCGATTCTGTAAGGCAGTTCTATCGTTCT

AGGCCAATTGTAAAACGAAACTATCCAAGTTTATGCGTACTATCTACATCTTTGTCAAAT  
CATGGTTTGTTCCTCGTGCTTTTGCAAGTGGCCCATTTACAGGGTCGGCACAGTTTCGA  
GAATCGAGGATCTTATCGAGGAAAAGGGGGAGGCAGACGAGCAGATCGACGT

>novel\_circ\_000083

GCTGCGATACTTCAGCAGACTGCCGAATATATATACCAGCTGGAACAAGAGAAGACCC  
AACTGTTGTCACAGAATTGTCAATTGAAACGGTTGGTGAATCAGCACGAGGGTGGCGA  
TGTTCCGATCAAGAAACGCAAACCAGATAATCAAGGAGGCGTCGTTGTTAGCCTACCG  
ATGCACGTTAGCGAGAGCGGTGACGAAGGATTGGGCAGCATGTCCCCTGAACCATTGT  
CGTAATAACGGTAACCACGGAGGGACATTCCGTGGTCAACAACGAGGTGGTAGAGC  
TGAGGCGACAGTTGGAGAGGGAACGTCACGCGAGGTTGCGTCTAGAGAAGCAAATGA  
GAGTTATACAGAATCAACTGTATCCGGAGAGATTTAGAGATAATCAGCTAATCACTTAC  
CAACCTCACGAGGTGATCGAACACACGGACAACGTGATCGCTCAAGAGACGGAGGAC  
GCGGTCGCCGCGCTTCAGGTGGTTTCCGTGGTGTCTTTGGCACAGGTTGGCACGACGC  
AGACCGTGGAAACGTCTAGTCCGGATCCAAGTTCACCGCCCCTGTCCCCACAGCCCGC  
GGACATGGTACCAGAGGAGATGAAAGAGGAGGAGGCGGGCCCGGGCTCGCCAAAGA  
TCGTGACGTTTCGGCCAGAACCAGGTGTTCTCCGCGATCGACGAGCAGACTACCGGCG  
ACTCGTTCTCCTCCTCGAGTCGCGTCACGTACACCACGAGTACGGGGGAGTTCAAGAA  
CGCGTCACCCCAGTACATCACCACCAGCCCCACCAGACCGTTCTCGCCTGCCGCGGAA  
CCGCAGCGGCTACCCAGCATCCTCGAGGCGCGATGAAAGCGGAGCCGAAGGTTGAG  
GTCGAGAG

>novel\_circ\_000086

AGTCTGGCCACAGGTTGGACAGCGGCTCCCCGTTCTGGAGGATTCAGCTCGATCAGGA  
TCTTCTGGACACCATCAGCGCGATATATCCGGAGTGGTTTAAGGACTATACCAACACCC  
GAGCCTCGACTTCCTCCTCGTCGAGTACTTCCGGTGAAGTACAGTTGAACACCGAGGG  
CATCGTGGCGGGCCGACACCAGCGCCGTTCTCGAGCACAAGGCCGTCAAAGGTGATAC  
CAAGTCCAAGTCCAAGGCGAAGAAGGTGGACTGCTTAAAGGAGAAGGAAAGGGACA  
GGAAGGAGGGCAGGCGAGAATCCAAAGACGAGAG

>novel\_circ\_000087

AGTCTGGCCACAGGTTGGACAGCGGCTCCCCGTTCTGGAGGATTCAGCTCGATCAGGA  
TCTTCTGGACACCATCAGCGCGATATATCCGGAGTGGTTTAAGGACTATACCAACACCC  
GAGCCTCGACTTCCTCCTCGTCGAGTACTTCCGGTGAAGTACAGTTGAACACCGAGGG  
CATCGTGGCGGGCCGACACCAGCGCCGTTCTCGAGCACAAGGCCGTCAAAGGTGATAC  
CAAGTCCAAGTCCAAGGCGAAGAAGGTGGACTGCTTAAAGGAGAAGGAAAGGGACA  
GGAAGGAGGGCAGGCGAGAATCCAAAGACGAGAGGGACGCTGGAAACGGTAAGAAA  
GGGACGAAGCCCTCGCCGACGAGGATAAAGCGGCGGACGTGGCAGGAAGGAAGGC  
TGCGGGTGTTCCAGGATCGGGCGCGGAGATGGCCGAGGGTAATCAGTCGCCGCCGAA  
GGCGGAGGTCGACGACTCGTCCCTTCAACACGCCATGGATCGCAACAAGGAAT

>novel\_circ\_000088

CATTGAAGACGCCACCGGCGTTCCACGAGCAGAGGAAGCAACTGGAACGGGCGAAG  
ACCGGTGATCTTTTGAAGGCGAAGATCCAGCAGAGACCGGGCAGGGAGGAGCTGGTC



AGGCAGCATATCCTCGAGGATGTGGGTCACGTGGACCCAAGCCTGGCCGAGAGGCAA  
CGGATGCTGAAGAAGGCCAGGCTGGCCGACCAGCTGAACGACCAGCTCAGTCATCGA  
CCCGGACCGCTCGAGCTCATCCAAAAGAATATTCTCCACACGGAGGAGCCTATTGAAA  
GGGCGGTCAAAGAGGGTCACATTCCCTTCAAGGCCACTTGCGAGGGCCAAGTAACGA  
AGCCCCAACACCCGGACCACTACATCACCTTCGAGGACGACTCCCAGAGCTCGGAGG  
GGGCGCCCTCGCCCCAGCTGGAGTCCCGGTCGGACGTTCTGGAAACGGCGGCTGCCT  
CGGCTGGGATAGTGACCGTCTCCCTCAGTATTCCGACGACAGGCGGTGCCGTGCTCGT  
CTCGTCCACGTCGCCAGTGTTCCAACAAGCGTCCAACGAGTCGACGATACAAACCTTC  
GCCGAGCTGTGCAACACCGTGGTTCGGCTCGCAGCAGCAGCAGCAGCAACAGCAACA  
ACAGCAGCAACAGCAGCAACAGCAGCAGCAATCGCATCAACAGGCCCCAGCATAATCA  
GCAACAACATGCTTCCACGCAGGCGAGTCAGACAAACGGTCCGTCGACGACCCTCCT  
TCCACTGGCGCCGGCGCCGAGTCCGATGTCCTTGGGCTCGACCACGTCCAGCCTGAGC  
CCCCTTTCCAATATCTCGATAGCGTCGCCACCGGCACCACCGCCGGCCGCCATCACCCC  
CAGGCCTCAGGCGAGCCCCATTGCGGCCGCGTCCACGTGTCAGAGGAGCGACGCGCC  
CGGCAAGGATAAGAACAGGAAGAAGTCCAAGACCAAGAGTCAACCGAAGACGCGCA  
CCATCAAGTTTCACGAGTACAAA

>novel\_circ\_000089

CGTGTGGCGAACCAGGCGCTTACCGTTTCGCCACAGCCGGCAGTAACGGTGGAGGGG  
CCGGTGTCCAAAATGTCTCCACCAACGAACGACGTGACCAATGGTGTGGTAGCGCCAC  
CCAACACCCTGGCGCCCCGGGTTTACCAGACCACGAACCCGGCCCTCACCACCATCAA  
CCCGCCAACGCACAAGCGGACTCCCAAGGACTTCATCTTTGGCAAGGCGATCGGCGA  
GGGGAGCTTCTCCACCGTTTACCTGGCCAAGGATATCCACACCGGGAAGGAGTACGCG  
ATCAAGGTGTGCGACAAACGTACATCATCAAGGAGAAGAAGACGGAGTACGTGAAG  
CGAGAGAAGGAGGTGTTGAACATGCTCGCGGGCGCGAAGCACTCGTTCGTGCGCCTG  
TTCTGCACCTTCCAAGACGTGGAAAGACTCTATTTCTGTCCTGTCCTACGCGAAGAAGC  
GTGAGCTGTTGCCGTACATCAACAAGGTTGGCTCGTTTCGACATCGAGTGTACCAAGTT  
CTACTCGGCGGAGATCCTTCGCGCGCTCGAATACCTCCACGGCCTGGGGATCATCCATC  
GCGATCTCAAGCCGGAGAATATATTGTTGGACGAGAAGATGCACGTGCTCATCACCGAT  
TTCGGTAGCGCCAAGATCCTCAAGGACCCGGAGACGGTGACGCATCCCGCGGCCGAC  
GAGTCGCAGCAACAGCAGCAGCAGCAACAACAACAACAACAGCAGCAGCAACA  
ACCGTTCCGAAGAGAACGCAGGGGCTCGTTTCGTTGGCACGGCCCAATACGTGTCGCCC  
GAGCTGTTGACCGATAAGACGAGCAGAGCGTCCGATCTCTGGGCCCTCGGCTGCATAA  
TCTACCAGATGGTCGCCGGCCTGCCCCCTTCCGCTCCAGGAGCGAGTACATGATATTC  
CAAAAAATCCTGAAGCTCGAGTACGAGATCCCGGATGGATTTTGCGAGCTGGCGAGAT  
CCCTCGTCAGTCGGCTGCTGGTGCTCGAGCCATCGCAGAGATTGGGCGCGCAGGACG  
AGCACGGAGCCGGTTACCCGAGCATAAGGGCGCATCCGTTCTTCGAGGGTGTGCACTT  
CGAGACCCTTACGAGCAGACACCGCCCCGATATACCCCTACCTACCCGGCACGTGCG  
GAGAACGAGGAGCTGAGGTCGCAGTACAGGGTTCCCGACCACCTGGAGCCCGGCCTC  
GACGACAAACAGTTGACGAGGCTTCTCGGCCTGGGAATCGGCGAGGACGACGACGAC  
GACGACGACGAGGACACGGCCACGACCGAGCGCGAGAGACCCGCGCAGACGAGCAC  
CGTCGTGTGCGAGAAGCCGAGGAGGACCAAGATCACGACAAGCAGCGACGGTAACAT  
CGCCGACCTGTGCGCGGAGGAGATCAGGAACCGATTGGAGAAGCAACGCGCCTCCAA  
CCAGTGGGACGGTTTCGTGCGAGGGGAAATTTGATATTGAAGCAAGGGTTCGTCAACAAA

AGGAAAGGGCTGTTTCGCAAGACGGAGAATGCTCCTGCTCACCACCGGGCCACACCTT  
TACTACGTTGATCCTGTGAACATGGTGCTCAAGGGGGAAATACCCTGGAGTCCGGAGC  
TTAGGGTCGAGCCAAAGAGCTTCAAAATTTTCTTCGTCCACACGCCGAACAGAACGTA  
TTATCTGGAAGATCCCAGAGGATTTCGATTGGAATGGTGTAGAGCGATAGAGAATATGC  
GAGTCCATTACTACGGCCTGCAGGAGTCCACCGCTTAAACAGAAGACTGATGAACGGA  
AATCGTTTCGGATGGAACAGAGAGCGAATCGTTTCACCGATTACG

>novel\_circ\_000090

GTTCAATTCGGGATTCGATTGTTCAATTGCGAAACAGAAAAGGAGGAGAATAGTAAAG  
GATATTTTTCTTAAAAGTATTCTACGCAAATTTAAAATCAGAAATAGATTTTTTCGAAATA  
GATAAGACTTCTGTGAGACTTTTGTGACTGATTGTATATATTTGGTGAACAGCATTTTGT  
GACATGGGTATCGGATATAACTTGAAGATCTCGGTGAGATCGGATGGGCTCCTTTTATAT  
TTGTCCCTCTGAATATCTTGCTATGGGGTTTAGTACGTGATTGATAAATCCGGATGAGCC  
GAGCCGCCTGCCTTCAAACGAATTTCTTTAATATCTTGCTCTCCGGATCGAGAAGAAA  
AGAGAGAGAAAAAGAAACAGAGAGAGAGAGAGAGGAATGGCGATGCAATTTCTCAT  
CAGCCCCCGCGAGAATCGCTTTCTCTTAGGGGAGTAAATTAGAGAATCGTGTTACGA  
GGAATCGGCGCTGGCTAAGTGCTCTCTTCACGATTTATTTTCCAATTGAAACAGCTTCA  
TCTGACTTTTTGAAATTCTTGTTTCAGAATGTTTGCGCGATCTCTGTTTCTGGGCAATGA  
TTATGGATATAGTTTAAGTTTCGAGGAGAATTCTTGGAACATAAGTGTTGGCAAAATTT  
ATTCGTTTCGTATATACATGAGGAAGAATGATTTAAGAATGGACGGAAGAAGAAATTTA  
TTGGTAATTTCTTGATACATTCTGTGTTACATATATGTTTGATTTTGTAAAATTTACAAG  
AAAATGTAAGAGTAAATTCACCATTCATTTTTGTGCTTCTTTAATCGTTTAAACAATTTT  
CTTTGAAATTTGTTAAACATATAACACGCGTTCAAGGATATCCATAATATATTTTCATATAA  
TTCGAGAAGATTTTCATTGAACCACTCATCAGAAAATATTAATAATTGTATTGAATTTGGA  
TTTCGTAGATCCATTATAATAAGATTACAACTATTCGATAGAAAAATCCATTGAACGAT  
AGATTATTCTATATTTAATATTTGCAACATTACCGTTGAACAGTTACTGTACTTATGGAAT  
TATGGCAGTAGCTTTTGAAGAAGGGCATCCGAAGTTTGATGATCCGTAGGTCGTGAAA  
GGGGATAATGAAGGAAGGATGACGAAGTGCAACTTTCGAAACTGTTGTACACAGAATC  
GAAGCGGTGCACT

>novel\_circ\_000091

CTCCACTATCTGTCAAGCGTTTTACTATTTGTGCAACAGTAGATCTCTTCTGACCAATAG  
CAACATAAATACAATACAATTTTTTCTTCTCCTCTCCAGCATCATTAATCGTTTTTGATT  
AATAATTGTATCAATAGCAAGAGCAGTTTTTCCAGTTTGCCTATCTCCAATAATTAATTC  
ACGTTGACCACGACCAATAGGTACTAAAGAATCTACAGCTTTAATTCCAGTTTGCATAG

>novel\_circ\_000092

CTTCTGATGCAAAATTGAAACAAGTTGTTACTGACTTCCTTGCTTCTTTTTTCAGGCTAA  
ATGTCAGTATAAAGTAATTAATAATTCTCTGCTATGCAAGAGCCACATGCAATAATATT  
CATTATTATATAATTTTAATGTATAATATTTGCACATTATAAATAACATTAAAGAATTCAT  
ATTTACATATTAAAACACAATAGTCATACAAATATTTATAAATATTACATGTTGACTCTTAT  
TATCAAGAATAATTTTGGTAATTAATAAAAAATACTTCTTCTGAAGAAAGTTTCATAGCAG  
AAATAGGAGAA

>novel\_circ\_000093

GCATGTATCAATGATGATCTGGATATGGTCGAATTTTTAGTGGAAAAAGGAGCTGATATC  
AATTGTGGAGATAATGAAGGATGGACACCATTGCATGCAACTGCATCTTGTGGATTATA  
TCTATTGCTAAATATTTAATAGAAAAAGGATGTAATTTGGCAGCAGTTAATTATGATGGT  
CAATTGGCTCTTGATATTGCTGAAAGTGTTGAAATGGAAGATATGCTGCAACAACATAT  
AAGTAAAGCTGGTATAGATTGTGATCAAGCTAGAAGTGAAGAAGAAAGATCAATGTTA  
AATGATGCCAGAGCATGGCAATCAGGAGTAGCTGGTAAGGATTCAATCCATCCTAAATC  
AGGAGCTACTGCTCTTCATGTTGCTGCTGCTAAAGGTTACATTGATGTCATGGAAATATT  
ACTTCAAGCAAGATGTGATGTTAATGCTCAAGATTTTGATGGTTGGACACCTTTACATG  
CTGCAGCACATTGGGGACAATTAGAAGCTTGTGAACTTTTAGTGGAAAACCTTTGTAAT  
ATGGACATTAAGAATTATGCTGATCAAACTGCATTTGATATTGCTGATACAAATATATTAT  
CAGCCCTGGAGGAATTAAGCAAGCAACAGTTGTGGATGAAAGACCATCCACAAA  
TTATTAATAAAAAACAATCAACTGTACCAAGAAACGTATATCAACAAATAATGAAAAT  
ACTATAACCACACAAGAATCTGTAGAAACATTTGAAGAAGAAACACCAAATAAAGTTA  
AAAAGGTTGAATTAGAAATTCAATCTGATAAAGAAGATTCTAGTGGAACAAATAGCGA  
CGTTGCAATTTGTATTTCTTGTAACAATGCTGCATGGACAGAAGCGACACGTGAAACA  
GATATGGAAGAGAGTGATGGTGAAGGTGAATCTGAGACTAGCTCAGACTCACATTCTT  
CCACTTACTCCAATCAATCTGATAAGTCTAACGAATCAAACCACTCTCCATGTCTTACA  
GATGATGAAAAGAAAAATAGAGCAAACAGAGAGGAAACATCATCACGTAACACTTCA  
TCAACTATTGATACTAATAAAGTTCCTAATCAGGCTCCAATAATGCCTCCAAAACAACA  
GACTGATAATGAAGAAGGAATTATACCATCTTGCGACGATCTGGTTCTTTTAGAAATA  
GGGTACAAAATACAGAGACAACCTCACACTTTATCTTCTA

>novel\_circ\_000094

GATCAACGTGTCTTTCTCGTACCCTGGATTATCGTCGTCATCACACCTGTTTCGTCGAT  
GTGGCCCACTCCTTATATTTGTTTATCGTTGCTTCCACTTTTGACCCGACAAAGGTGATG  
CTATATACGTTGAACTTCTTCCTTTTCTGCCTGAACATATATCCGTGTTGTGCGTGATCT  
CCCAGTATCAAGAATACGTGGCCGCGGAGGCACTGCCGCGGACGACTACGAATACAG  
GGTCAGTATTCTGAGACTCTCTCAACGGAGACAGGAACGAGATAAGGGACGAAAAGT  
TCCAGCAGTGAGATATGCCGTTTCCAGCCGCCAACTACAACGGCTACGTCTTGCCTGAGT  
TCTCGTAGGGCGGCAACCAACAACGAAACCAAAGCAACCGCAACGCCAACCAGAG  
CCCTACCGCGGCTCAGAACACCCTCTCCTTGGATAAAAGTCCTGTCACGGGACGATCG  
AGAAAACACGTTTCAGTTCCCTGACACAACGAGATCCGATAATCAGAAGGGAAAATCC  
G

>novel\_circ\_000096

GTCGAACAAAGATCGAACGAACGTTTTGATGTTGTACACGAAGAGAGTGAGGCATTTT  
ACGAAATATAAAATAAACTCGGTGGATATTTTTCTCGAAACAACACGCTTCTGGATGGG  
AAACAGTGTTATTTACAGTCTTAGAGCAACTTAACCGATACGGTTTTGCGTTGGAACCT  
TAGGCTGGAAGTGACTTAGAGAGAATATTTGTCACTTGTCTGAATACAGTGAAACAAA  
GTACAAGAGATTTCGAGCAAGAAGTAAGGACGATCAAAAATTACTTTTTCTTTTCTACG  
ACGATATTTTCATGAATTAATAATCGTATCGAAATAAATAAAAAAGAGTTTTAAAGGGAA  
AGAAAAATACATTGATAAAAGTGTAATATCATATAATTACCAAAATATGCATATGAGTTT  
CATTCAGTAAATTAAGAACACGTTTGTAATCCAGTTCTGGTGCAGCACGTGAATAGAA

TCGGTTGGCAAATTCCGTAGCATCACGATTGTATGTTTCTTATGAGCATATGCTGCTCCT  
TGTTTTCTTTATTGCACGCGATATTACATTTGAATGCGTGAAATTTAAATTTCCCTAAAA  
CCATCTCGTTTTCAACGTATGTTAACAAAATTGCATCATTGAATCTTGATCGTCCAATAA  
AAAGACAAGAGAATTGCCGGATAATGGAACGCAGATCTTAAACGTAAAAGTGAAACA  
CGTTTATTTATAACAAAATTAGGATATCTCCAATTTGCACAAACTCTTG

[illegible]

GGGTTGGAATGACGAAAAAAGACGAGGGGATGATAAAGGGAATCGAGGACAAATTTGA  
CGAGAGAGAAACGATGAAATGATCTGTTTGATCTGTTCGATCGTAAAAAAAAAAAAAAAA  
CAAATTTTCGGACGATATTGCTTATTTTAATCTTCCGTTATCTCTTTACAAAATGAAAAAT  
ATTTAATAATATAGAGTCGAGTGCAACAGTTGCGCGAGATCCGATTAAAGGCTTACTGT  
CGCGTACGCGCCAACACTGATGGTTCATGGATGCCTCTACTACGGCCCGATACTTGTA  
GAACTTTTTTTTTTTTTTTCAGAGAACATCGCGATTTCATGAATGACGCGTTTCACTACGAT  
AAAGGATAGGGTTGAAGAAAATTGTGATGCGATTAAAAGAGAATCGTTACAAATTCCT  
GTTATTGTTGTTGGGTCAACGATACGATAGATTACGACAGATTTTTATTTTCTAATTAAAT  
ATTTAAAAAATGAAACGTTCTTTTAACGTTTAAATTGTAATAATAATAACAAGGGAT  
TGATATTATATTTTGAATTAGTGGAGCGGAGGAAGAAGAAGAAAAAGAAAAATGTTTG  
CCCATATTACCGATGAATTTTACAAGTGTTCATTTCGAGCCACTATCCTCCGATATTAAAT  
TTTAACGCTTATTTCTTACGTTTTTCTTAAAGGATCGAATATATTTTTCTCCTCGTGTT  
ATCTTCTCTTTAATAATCGCGATCGACCATCAAATGACCGATTATTCTCGTATTCTCGTC  
GTCGGATATATATATTTTCATTTTTGTTTCAATAAGAGGAACAATAAAAAAAAAAAAAAAAAAT

CTATTCTTGCCCAATTTTCATCCGTATACGCGATACACGTTTCGAAAGAGAGAAAGAGAG  
AGAGAGGAAAAAAGGGGTGCAACGTTACCAGGTCATGCAAAATCGATATAACGCG  
ATATACATTTTCATGCGGAGTATCCTATAGGCCCTGCTATTCTCTCTCTTTCTCGCGATC  
TCGTGCAGGAAACGAAGTAGTAAGCGCGAGAGTTGCAAAGTAACGTAATTCAACAAC  
ACAACAATTTAGATTTTATACCGGTGATTATATATGGAGTGGGGGGGAGAGAGAGGTA  
TCGTTTCCTTGCCATTTACAATATCGCCCGTGTCTGAGGAGGCAGAAAAAAGGAAACAA  
GAAGGGAGAATCCGTGGAAATAAAAAAGTCGTCTGTCGCCGCGAAACTACCCCCGTTTTC  
GAGAAATTGCATCGCGTTTTCCATTAACGTTGCAACATATTAAGAACTGAGACGATCGA  
ATAATTGCGGCTTTATCCCGGTGTATCGTGTTGATATCAACCGTGAATAAACTCGTCGAC  
GAAACACATTCTCCTTCTCTCTCTCTTCGAAGTCCAAGAAATAGAAGAAGAAGAA  
GAAGAAGGACGAACACGATAATGGAACGATGCGCCGTTGCGTATTACGAGCGCATTAC  
GAAATTACAATTTAAGCGAGGTTGAGCGGAAGAGCGATCGGAATGGCGCGAAAAGTG  
GGGGATGAGAGAGGCCTGGTTGACGCTGGGCGGAAGAAACAAGCAAGGGAGTAGGA  
GGAGGAGGAGGAGGAGGAGGGTGGGAGGGCTCGGAGGTGGACGCGGAGGAGGAGG  
AGGAGGAGGTGGAGAGGAGGGTGGCGTAGCGCGCGAGCTTCCGATTTGTCCCCGGCT  
TTCCAATATTCTTCTCGGTCGCCGATTGGAGATCGAATTGTCCGTTAATTGAAATGATTA  
ATTGTCTCACCTCTGGCGGGGCCCTGGTCGAACGCGTTTCGCGTTCCCGTGATTGCTTAT  
TTACAAATAGGAAATTCGAAAATGTGCAGAATCGCGCGCGGCGACTGAGCGGGAACG  
CGCGCGACGAGCAGAGAGGGAGAGAAAGAGAGAGAGAGAGAGAGGGTGAGCGAGAAA  
GGAGGGGGGGACACTCGACACTCGTTTCTCGTGCAACAGAGATCGAACACGGAAACA  
CGAGGGTTAGAGGCGTGAACACAGAAAGAGAGGGAGAAAGAAAGAGACAGGTTGTA  
TGATCGTTCGTGAGACACAGATACACGTATATATATATACGTATATACGCGTTAGTAGT  
GGTGGTGATGGTGGTGGTGGTATTTCGTGGAAAGGGGGTGGTGTAACCTCGGATACT  
CGCTCGCTCACCGAGTTTCTACCGGTGGGGGTGGCCCGAGGGGGAGGGGGAGGCGAG  
ATGGAGGCCATACGAGGGCCGCAATATCGTAGGATATTACGAATTTGCTATTTTCCGCGG  
CGGCCGAATTGAAACTGGGATTGTTAATTACTCGGTGATTATCGCAGGCAGAATCGAAG  
TCGCGCCGAAATTGCAGAAATCGAAATTACTTTACGATCCTTCTTCTCTTCTCTCTCT  
CCCCCTCTTCTCTCTCTCTCTCACACTTTCGTGCGCGAACACGATAATACAAGCGTATT  
CTCTTCTCTCTCTCTCGCTCTTCGTCCACACTTTTCGACACCGCTCTCTCTCGCTCGTCT  
TAATCGTACCTCGAAACACAGTTTCTAAACGCACTCTGTGCGTTTAGTAGACGGTCAAA  
AAAGAAAGAGGAGAAAAAAGATTGAATTGAGAGAGAGAGAGAGAGAAGAAAGAGC  
GGGCTAGGAAACGAGGAGAGAAAGAGAGAGAGATAGAGAGAGAGAGAGAGAGCGAGC  
GGGCAAATTGAAATTCTGTAGATGCGGTGCGGGTGTACGCTCGGCCAATTGGAATGCAG  
AATCATACCGGAAATGCCGAGTAATGCACCAATCAGAATCTGGGAATAGTTAGAGGCC  
CCGGATGATTAGGAATGCGCGCAATAACCTCTGATTAATGTGATCAGTGATGATATATG  
CCGTGTAGCGTGGCACGGCGGCGTCCGTGGCGTCCGCGGCCCTCGGTGGCGTCCGTGG  
CTCGTTGCTCCATCCTTTGGCTCCGCTTACATGAATACCACCCCTTCCCTCCTCTCTCC  
TCCATTTGCTCGCAATCCTTCTCTCTCTATCTTGGCTCGCTTCCGTCCGAACGTACTAC  
TACTGCTAGCACCACTACTCCTCCTCCTCCTCTCATCTTTCTCTATCTGCCACGAATTTG  
CGATCCGTTCCCTCTCCCTCGATCCTTCGATCCTGGTTGAACGCATCCATCCTCGTTGCGA  
ACGCGAACAGGAGTTGCTGCTCCTACTACCACCTCCACCACCCTTCTACTACGATTATA  
CGCGCCTTACGCGCATCTACGAACGTGTGTGTTACGCAAATTCGCGCGGTGTGTGTGT  
GTAATACACGCGTCCTCCTCCTCCTCCACCTCTTCCCTACGTATGTATACCTAGAACGAA  
TAACAGGGAGAGAGGGAGGGAGAGAGAGAGAGAGAGAGATTTCATATTGCTATGTGCGCG

CGTATAATATATCTCCGTCCACGAACGAGGAGGAGGGGGAGGGGAAAGGGGGCGAGTA  
TAGTTTGTGCAAGAGCTTGGTCGGTCGCAAACGAGAGAACACCGAGCGTTGGGGTTC  
GTAGTTGAATCAGGGGGAGAAGGAGGAGGGGGGGGGTAAGGGAAACAGGGTGCTG  
CGCGCGTGTGCTGCTTGCCGCCGCCGCTGCACCCGCGCTTGGATGGAATAGGGGGTAG  
GGGGTAGGGGATAGGGGGAGGGTAGTATGCATTACATAAATACATAACGCGGGTGCAT  
ACAATGTTAGTGCTATGCTGTCAATTCTACCCTTGCAGCGAGGCAATTCTGAGTTATGC  
CAGAACGCCATGCCCTATGACGGGCCTTCCCTCCGTAGTATGCGGGCTGGGTACCCTTCG  
CGCGCGCTTACCCGTATGTTTGTGCCTACCCCGTGTGCTCTCACCTCTCCCGTCTCCCC  
CTCCTCCCTTCCCTTATATCTCGCCCTTAGCCCCGCTCTCTCGCGTCTCTCCCTTCTTCCA  
CCCTCTCCTCCGCCCTTCTCTCTCTCTGTCTCTCTCACCGTGATTGCAACATTCATC  
TTTAAAGTTTCTGCGGAGATACGAGACGGGGATGGATCTAGCCAGTCTTCCCGGTTT  
TTCCTACCTTTCCAAGAGCGAACGACGAACAGGCTCGGATTCCAATGGATGGAAATGA  
ACGTAGATTATTATTTATATGTTATTATTGTTGTTAGGTCGAAGGAAAGAGTTACGATATA  
TTGTTAAGCGAATTCGATGAAGATTGTGAAAAAATATGTATATATATATATATCGTGTTA  
TCACGCGCGGTTTATATGCACACCGATCTAGTAAGATACTAATCGAAACTGTTATCGAAT  
GAGTAGTGACATGAATGAACGATTCATGTACAGCTATCGCGTGAATGCTGTCAATTTGT  
CTCGATGTTTCTTTTTTTTTTAAACCACCATCACGATTCCGAGGAAAAATCGTAAAAGAGA  
GACCGTTCCGTGCAATATAATAACAATATAATCGTCTGAATCCCGAGGAATCTTCGACCCT  
CCCTTTCCTCCTCCTGCTGCTCGAAAAAGAATTCGCGAGAAATTAACGATTGGAACG  
CGCAGGCCCGGTTTCGGCCGGTTTAAAAAAAGGAACGGGGAAAGGGGAGGGCAGCC  
AACGCGCGCGGCTTAATCGAAACGCGGGGAATTGAAAGGCCGGGGGTACCTTCGACT  
CTTTGCCGGGGACCGCAGAGCCCATTAACGCGCCGCCACTTACGCTTACATAATAATA  
ATGGTGAATAACGAGAAAGCGTCTTTGTCCCGTTGCTTGTTTTTTTCCCATAGTTGGCC  
GGGCGCAAGGGGTGCGGGTGTGGGGAGAGGGGGTAGTGGGTGGCACCGCCGCGAAA  
TTAAACTACTAAATCTCTTTTGGCGAGCGCTATAAAGCGATGTCGTGTCCCCTACCTG  
GGCTATATTTCTCGCCGGTGACGATAGAGAAGAACAACCGTGGCGTTTTGCATTTGATG  
TATTTACAGATACGCGCGTGTTATCGTTAATTCATTCTCGTTACATTTTTTTTTTGAATA  
TATTTTCTGGACATCGATGCTGAATATAGATGTAATCGAGAGGATTGATCGTTATCTAGG  
GTAGGAAGGAATTGGTAATTAATTTGTTAATAGTAAATGGTAACCGATAACTTGATATCG  
TTGGGAAAAAATGTAAATTTAATGAGCGAGGGAAGAATTTTCGAACATCTCGATCCGTT  
GAAAATTCTTTTATAATTGAATCTTCCTCCTCTTTATTTTTCTCTTTTCTTTCAAAGATAT  
CACGAAGATATCGTATCGATGTCAATTATTTTATATACATCTCACGCATTCGAATCGAAT  
CACGTTTTTTTCTTTTCTGTTTCAGGTGAGTAGCTTTGTTCGTGCGATGACAACGTGTT  
GCGTTCTCGCGTGACGCGTCTCCAGATCTCCAACGAAGCTTACTTTAG

>novel\_circ\_000099

ATGCGGCCTCGCTGTTGAGAATTCGTTGGTGACCGGTCGGTCGAGAGAGGGAGAGGC  
GAGAGAAGTTTCGACGACCGAAAAACGGAGGGAAGGGTGAAAGCGAAAGAGGAGG  
CCGCGGAACGCGTAAGGAAGCGCGCCAAAAGGCCGAAGGAGGCGGGGGAGGCGGAG  
GGGGAGGAAGAAGAGGAGGAAGAGGAAGAGGAGGAAGAGGAAGAAGAGGAAGAG  
GAGGAGAAAGAGGAAGCGGAAGAAGAGGAAAAAGAAGAAGGAGGAGGAGAACTA  
GCGAGGAGGAGGAGGAGGAGGAGGAGGAAGGTGGAGAGGAGCGAGTACGAGAGCG  
AGAACGAGGAGGAAGAGGAGGAAGAGGAGGAGGCGGAGGAGGAGGAGGAGGAGG  
AGGAGGTCGGGGCGGAGGAGGAGGAAGCGGGGTGGGAGGAGGAGGAGGAGGAAG

GGGAGAGAGGAGCGGAAACGGAAGAGGAAGAAAGGAGCGAGGCCGGAGGACGAGA  
TTTCTCGACGCGGCAAACATGACGCAGCAAAGCGGGGCTGGGTGCGCCCAGCAATTC  
TGCCTACGGTGAACAATTACCAGACGAATCTGACCAACGTGTTTCGACCAGCTTCTCC  
AGAGCGAGAGTTTCGTTGACGTGACCCTCGCCTGCGACGGGCACAGCGTGAAAGCGC  
ACAAGATGGTACTGTCCGCGTGCAGCCCCCTACTTCCAAGCCCTTTTCTTCGACAATCCA  
TGCCAGCACCCGATCGTCATCATGAAGGACATCAAGTGGCCCGAGCTCAAGGCCGCGG  
TCGAGTTCATGTACAAGGGGGAGATAAACGTGTCCCAGGAGCAGATCGGCCCCCTCCT  
CAAGGTGGCGGAGAGCCTCAAGATACGGGGCCTGGCCGACGTGAACAACGAGCACG  
AGTTGGCGTCGAGATCGAACCTCGAGGAGGCGGCCAGCGCCGCCCTTCACAGGAAGA  
AGAGGCGCCGAATATCGGGCGAGAGGTGCGCCCCCGCGTGCAGCCCCGACCGGATCC  
CCGGCTCGGCCAGCATCCCCGACGACGGGGAGCCGAGCCAGGTGGGGGGCGGGGTGA  
TCGTGCCCCGACATCCACGGCATGCTGCCGAGCAGCTCGACCCCGCGCTCCCTCGGCTC  
CCCGGGCACGCCAACGTCTGTCACCCCGAGATCAACCTCCAGGAACCTCCGGTA  
TCGCTGCCCCCTGCCGCCGCCGCCGCCGCCGCCCTCAGCCCGGCCAGCCGAGCTCGC  
ACTCCATACCCGCTCACCACGTGCCTCCCCACGTGACTTCCGGTCCCCACGCGCCCGT  
CAACCACCTGACCGCCCATGGCCAGCAGCTCGCCGTGCAGCAGCAGCAGCAGCAGCA  
ACAGCAGCAGCAACAGCAGCAGCAACACCACCCCCAGCCAGGACCTATCGTCGTCCC  
GCCGAACCCCGGGGACGATCTCGAGATCAAGCCTGGCATCGCCGAGATGATTGCGGAG  
GAGGAAAGG

>novel\_circ\_000100

GTCTTTCGACGACGCGGAAGATCGGGCGAGGAACGGGCGAGGAGGGCATTCTGAAAA  
AGTCTTCCGCGTTTCTGTCCAATTCGCCCATCCGGCGGGGCAAATCAGGGAGAGGAA  
ATTGAACGATCCGGGGGAAGGGTTCGGAGTCGAGCTCCAGGTATCCGAGTTTCAAGGGT  
TACATCTCGTTGCTGAACAACCATCTCGACCCGTTTCAACGAGCTGGCTCCCCAACAA  
CGTTGCTGGCCGAGCGGAGGAAAACGAACGGCGTAAAGAAATCGGTGTCCTTCAGTT  
CGGACACTAGCTTCGAGGAGAAACGCGCTCCTTATAAAAGAGCCGCCGTTACAGAGGT  
CAAGGTGTATCACAAGGGTGTTCTGCAAGATCGTAGCGTACGCGAGGTGGATATCGTC  
ACGAAAGTGCCGTCTCTGTGGGAAGAAACCTCCGAGGGCCCAGCGGCCCTTCTGAGG  
GCAGCAAGAGACGCCGACGATGCGGTCTCAACGAGATCGCAGTTCAAGTGCGAAAA  
TTTGGATTTGGGAGCATGGACGTCAACATGGCTGATAGCAGCGGCAGA

>novel\_circ\_000101

TTTCAGGCTGGCTAGTTTGAAGATTTTACAACAGCGATGTCTCATCATTCACGATG  
GATTATGCGAAACATCGTATATCTCTGTCAACGGTACAACGCGCGATTTTGACAGTTGG  
TGCTGCTGCGATATCACTTCTCAATCCTTATCGAGGTGACATGATCGCATGCTTGGCAG  
AAACAACCGGTACTGATGCTCTTTCCTATTGTCATCGGCAAATGCTTGCAACCTCTGAG  
GGATGTCGATTCTTGCCGAAAAACACGCATATCCTCTTCAACAGTTGATTTTTCCGC  
GTAAAACGATTACCAGCAGGAACTCTTGAAAAAATTTATTATGATTTCTTGGAAGTAA  
ATAATGTATCTCCCGATTCAAGAACTATGGTCAAATTCGTCCAAGATACTGAATTGGCGT  
ATGTAATGCAACGATATCGAGAAACACATGATATTTATCATGCAATACTTTTGATGCCAA  
CTACAATGCTTGGGGAAGTATCAGTTAAATGGATAGAAGCATTGCAATTACGTTTGCCA  
ATGTGTTTAAACGGAGCGATATTTGGAGCATTTTCGATTGCATCCAAGGCAAAGAAAATT  
ATATCTTGATCATTATCTTCCATGGGCTATTAATACAGGAATTAAGCAAAATTTCTTTTG

GGTATCTATTTTGAGGAACGTTGGGAACAACCTCTTGTTGATTTCCATCGAGAATTAAA  
CATCGTTCCTTTAATATCGATGGAAAATATTTATAATGATATGTAAAGTCTTATCTCAAAC  
GCTTTTTTCTCTGTTATATAATAACAAGAATAGAAGTTATTAGGTAGTATATAACAATTTT  
TTTATTCACCGTAACGTTGGAAATATGAAGAATATAATTTTAAATGGAATACGTATGATTT  
GTATTACAAATATTTTCGATCGCTATAATCAGAAATTTTAAAAAATTATATTCCTGTGTATA  
TATATAGTGCATATACGCGGATACGATGAAAAGTTGATTCATTTACAAGCAATCAACAA  
TCTGACTAGCATCATAATGGACATAATATTCTAGTTTTTCGGTAAGTATTAGTAAATTGATC  
AATAATTACATTTTGAGATCACATATCGCATAATATGAAACGATATTTGTAATATTGATTG  
TCCCATTTGGTTTGTGGTAACGCGCACAACTATTACGAATGACTAAATTTTGATATAAA  
CAGAATATATACTTAAATAATAATTATTCAATTGGCAGTTTTATCGATTATAATTTGTCAG  
TGTAACATATTTTAAATTTTCCATATATATATAAAATATAATATCTTTCATGTTAATTATTCT  
GTTGAATTTTGAATTCTAAATCAAATTCGTTATAAAATTAATATTATGTATTTTGTCCAC  
CTTTTGTTCATGCTTCTCCAACTGATATAAATTTATTAATTTATTTATACAATTTTCGCA  
TTCATATAGAGAGAAAGCATATTAATATTAGTTATGAAGAGTCAATATTTAATTGAAGAAT  
ATTTTGTAGATTATAACCAATAATTGGAAAAATAAGATAATAACTTTTATGAAAAAGCT  
TTGCGTTTCTTGTTACAGGAAATATATCCAATAAGTTCTCTCTCTCTCTCTCTCTCTC  
TCTCTCTCTCTCTCTCTCTCTCTCTCTCTCTCGCATGTACATTATGTATTTTATACATATAT  
ATATGCGCAAAGTTGATTCATACATAAACCTAATTGAGCATTAAAAGTTAATGGCCAGA  
GCATCCTGATGTTTTTAATAGAAAGGAGTAGTTTTATGATATATTTTATGATATAAGCTATAT  
TAGGAATATATTAATAAAAAATGGACGAAGCAGAAGAATAAATCAACATAAAAAG  
CTGAAATTTATGTACAGGATGCTTCTTGCTGATTGTAATTGTTGGTCCATACTACTCA  
ATTATGAGTACCTGGAACATTCAATCGAAGGTTAATTTCTCGAGATATAGATGAATTTCC  
TCGAAACTAGGTCTCTCTTCAACTCGTGTGCTCCAACATTTTTCATTATACGATAAAGA  
TTATCCGGACAATGATCAGACTGTGAAGGAATTCGAGGTTGATTTCTTTTATCATTATTA  
TCATCATATTCCATTATCGATGCTCGTTTCTCTTTGATACCAATGACCATAGTTTTCTAAAA  
TTTGTGCGACTGTTAAATCTGCATATGGTATTTCTTTACAATTTGAAAAATTTCCCAA  
TTGTTACAGCAAATGACCAAACATCGGCACGGCAACTACGTTTACCCTGAGAAACAGA  
AAAAATGAATGCAATATGTAGAACTAGAAAATATCTATCTGAAGAACAAAGGAACAA  
ATATATATATTATATTCATAATATTAAGAAATAAGAAAGAAATAAGAAACGTTAAAT  
AATATTTACCAATAAACTGCTTCCCATGCCATCCAACGAAGGGGAATTTTATATTATG  
TCCATCGATGAAATAATGATGATCATATTTATTACAATATATAGCATGATCGGATACCTTTA  
TTTTCAGATCGAGACAAACGATGCAATTTCTAGAATTTATATTGATATTAAATTAATTTGT  
TTTCTTTTATTTTATTTTATCAAATATTTTATTACCTAGCCGCTAAATCACAATGTGCAAT  
ATTCATGGATTCCAGATATTTATACCAGATGCAATTTGGATAATAAACTTAAACGGCT  
GCCATAGCTGCGAAGAATAGACACGAATTGAAATACGAAGAAATGACATCTTGATACAT  
CATTAAG

>novel\_circ\_000103

AGTCAAGATGGACATGGCATTGATGGGCATTCTGGTATGAGTGGGAATCCTGCTGCGGA  
TTATAGCGAAGGTGCGTCTCATGTATTGGCAGTGATCCATCAAATTTTGGGTCATCATAG  
AGCGTTGGAAGCTCGTTGGCATGCTCGAAAAGTCAAACCTGCATCAACGACTCGCGTTA  
AGATTATTTCAAGAAGATGTGAAACAAGTTTTGGATTGGTTAACTAATCACGGCGAAGT  
TTTTATTAGAAAGAATACAGGTGTTGGTCGTAATCTTCAAAAAGCGAGAGTATATCAGA  
AAAGTCACGAACATTTTGAAAATGTGCGACAGAATACATATACGAATGCTACTAACTA



CTTACTGCTGCACAAGAATTGGCGCATACTGGTGAATGTGCTGCTGATGAGATATATGC  
TG TAGCGCAAGAATTAGAGGCTCACGTCAGTAGTTTTGCGGCAAGAGTCGAACAACGT  
CGTCGAAGATTAGATTTAGCAGTTGTATTTTATACACATGAAAAAGAGTTAAGTGGTTG  
GGTTGACGAATTACGACAAGAATTACAACAAGACGAAGTGGCGGAGAATTTAGAAAC  
AGCGGAAAGATTGTTGGAACAATGTGCACAACATCGAGCCTCTTGCATGGAAGCATGT  
GCATCGACTATTGTTTCAGGGAGAAGCATTGCTTCGAGAATTGCGAGAATCTACTGATGC  
TCCTGATACTACTGGCTCTATATCTGCGGTAGAAGCTGCATTAGATAGGTTAGCGAGCTT  
AAGACAGGAATTAGAAGATTTATGGGCTACTAGAAAATTAAGGCTAGAATTATGTTTAC  
GACTACGAGTATTTGAAAGAGATGCTCTAGAAGCGAGCGGTCAATTAGAGATGTGGGC  
ACAAGAATTACAAGGCCCATCTCGAGAAGGTTCTCCTGAACAATTATTACGTGCTCATA  
ATGATGGTGTGCTCATATGCAGAATACTGCATTTCAAGTTCTGCAACAAGGTCAAGAA  
CTTGCTCAGGTGTTGGAACAAGCAGGAGTTTGCATAATGGCAGATGGACAACATAGTG  
CTGCAACTAGAGTACAAGTGCTTCTTGAATTTTTAAACGAAAGAGAAATGGATGCGGA  
AGATTTAGCGGAGATGAGAAGAGTTTCGTTTAGAACAAGCTTCTCAACTGGTTCAATTA  
CAAACCGATGCTACACATGTTGCAAATTGGATTCGTAATGGAGAAGCTATGTTATTAGC  
TTCTTTGAGAGTTCCGGAAAATCTTCAAGATGCAGAACAGCTTCGTTTAGAACATGAA  
CAGTTTCAAGTCGCTATAGAAAAAACACATACTTCAGCTGTTTCAGGTAAAACACAGAG  
CAGATGCGCTAGTGAGTGCTAATCATTATGACCCAAAGAGTATAAGAGAGGTAGCTGA  
GGATGTAAC TAAAAGATGGCAACA ACTTGTGACGTGTGCAGAGGAAAGACATAAACT  
AGTAACAGCTAGCATTAAATTTTTACAAAACGGCAGAACAAAGTCCGTTCCGTATTAGATA  
GTCTTGAACGTGAATATAAAAGAGACGAAGATTGGTGTGCTTCTGGTGAAAAAGCTAC  
ACAAGTTCCAACACTTGTGGCAAACATCAAGAACAAAAAGAAGCATTTTTAAAGCA  
TGCACATTAGTACGGCGAACTGCGGAAACATTTCTTAAATATACGAATCGTAGTCTTCA  
ATTTTATAGTTATCAGGCAAATAGTGCTGGCTCTGAGAATAAAGTTAAAAATATTTTGGA  
GGAGTTACTTAGTAAAGAGAATCGTGTGCTCGAATACTGGACGCAACGTAAGAAACGA  
TTGGATCATTGTCATCAGTATGTTCTGTTTGAGCGTAGTGCTAAACAGGCTTTAGAATG  
GATTAGAGAAACGGGTGAATTATATCTAGCAACACATACCAACGTTGGTAAAAATCGTA  
TCGAAAACGAACAATTATTGCGCGAGCACAATGAATTTAAAGGTGCTGCGAAGGAAAC  
ACGAGAAAGAGTAAAGCTGTTGATTCAACTTGCTGATAATTTAGTCGAGAAAGGACAT  
GCTCATGCAGTGGCAATCAAACAATCTGTTGCTGAAGTGGATCAACGATATAAGGATTT  
TAGTACGCGTATGGATTGTTATAAAACACAAATTGAAGAAGATCTTGGAATTCAATCAG  
ACGATGGTCAAAAGGATCTTTCTATCGATCGCAATTCCGATCCGTTACTCGAGGAAAAG  
ATCAAAGGAAAAGATTTAAAGAATTAAACGAAGAAAAAAGAAGATCAGCGCGGCGA  
AAGGAATTTATAATGGCTGAACTGCTACAAACAGAACGAACTTACGTGAAAGATTTAG  
AAACCTGTATTCGATGTTTTTTGGAAGAAACACGTTGTGGAAAAGGAAATGTTCCATCT  
GGATTGCAAGGACGAGAATCTATAATTTTAGTAATATGGAAGAGATTCATCAATTTTCA  
AGTAACATATTTCTTCGTGAACTTGAAAAATACGAAACTATGCCCGAAGATGTTGGACA  
TTGTTTTGTAAACATGGGCACCTAAGTTTGATATGTATGTGACATATTGCAAGAATAAACC  
AGAAAGTAATCAATTGTTAGTTACTCATGGTGGGACATGGTTTGAAGAATTACAAAGA  
AAACATCGAGTTGAACATCCGATTGCTGCATACTTAATTAAACCCGTACAAAGAATAAC  
AAAATATCAATTATTATTAAGATCTTCAGGCCTGTTGCCAAGAAGGACAGGGCGAAA  
TAAAGGACGGCCTTGAAGTAATGTAAATGTGCCTAAGAAAGCAAACGATGCCTTACA  
TTTAAGTATGCTGGAAGGTTGCGATGTAAGAATAGATACATTAGGTGATGTAGTATTACA  
GGATTCTTTTACGGTATGGGATCCCAAACAATTGATTAGAAAAGGCAGAGATCGGCACA

TATTTCTATTTGAATTATATCTGCTCTTTAGCAAAGAAGTGAAAGATTTCGGCTGGGAAGG  
TGAAATACATTTACAAAAGTCGTTTAATGACTTCTGAGTTGGGTGTAACCTGAACATATT  
GAAGGTGACGAATGCAAATTCGCAGTATGGACAGGTCGTGCACCGACTAGCGATACAC  
GCGTTGTTCTTCGAGCCAATTCAATGGATGCTAAGCAATTATGGGTGAAAAGATTACGC  
GAAGTTATTCAAGAAACATATTTCAGTTTAAGTATGCCCCAAGAGTCCTGCGAAAAAAA  
GTTCAAGTCAACGATCCAGTAGAGATCTTGAAGAATGTACTTCTTTGGATGATAGTGTC  
GAGAATTTGGATAGAAATCTTTGGCATCTTTTGGCTCTACTAATACTACAGACTCAGAT  
AAAAGTGGCGTAGCCGAGGTGACCTGGGTGATTGCCGATCACTCTGCAGCACCGGGTT  
CGAAAGAGTTGACGGTAACGAAAGGCCAACAGTTGAAGTATTAGAAAATGGAAGTA  
ACATCAGCGGTGTGAATACATCCGAGTGGACTCACGTGCGTTTACTAGTTGCTCCAGG  
ACAAGTTGATCCTCCTCCAGAAGGATTAGTTCCTACTAGTGCGCTTAAACAACCCCCCTC  
CAGTTTCTAGTAAAACTTCACCATCTAGGAAAGTTCCAGGACAGCAGCAGCAGCAACA  
ACAACAACAGCAGCAACAGCAACAGCAGCAGCAGCAGCAACAACAATTACATTA  
TCAACAACAATCGAGTAGTCAAGTTCAAAGTGTGCGCATCCAGTGGAGGATTTGCAACT  
GCGTCCTCTGCTGCTGGAGTAGCAGGCTCTTCGTCGACTGTTGCAACAAGTGTAACAC  
CTGTGTTACCAATTCAAATGTTCCCTGTGTTGCCGGATGAACTGAAAACGTTGCAAA  
CGATGGAAGTACTCCTGCGAACACAAATCTCCAGGAAACAAAAGGCGTGGCTTTAGC  
GGGAGAAAGTGGTTACCTCCACCATTGCGTAACTTAGTCAAGGTAAAGTCGAGAAAT  
CGCCACCGACGACGACAGCGACAGCGACATCGATGACATCGATTGTACCGCCATCAGG  
TGATCGGTTGAAAAAGAATGTCTCGGAAAAACGATTCAAATTACCGACTGGTGCGGAA  
CAATCTCGACCGTCCAGAAGTCTTCTATTTCTATCTCCGCGTTAAACAACAGCGACTGC  
CTCTATGCGTGTGTCTGCTTCTGAAGCGGACCTTGACACTGAACTTCAACCAGGAATC  
GAAGGAGAAGAGGACGAAGGAGAAACGGAACAATCGGAACCAGAATTGGAAGAAGA  
TGTACCGGAACCCGATAACACAGAAGCTTTAACTTACTCGGAACAAAATGGAGCGGAC  
GATGTCGAAGACGAATTAGAACTTCCTCCGCGATGAAACCCATCACTGAACCGATAC  
TTGTAGGAACTGCGAATGGAGCATCGGGATCAGCAATTACAACAGAAGGCTGTGGAA  
AATCTCGAACATCTGAACGTTCAACGAAGATTCTTGACGGTGCCACGACGGTTGATT  
GGCTGAAATTGAACAGATCGTAAAAGAAAGAATGGAACAACATACGGAACCAAGA  
AAGACAAAGTCTGATGCGAACACCTAGTGGTAAAAATTCAAGCATTGGTGGCAGTGG  
GGATAACGATTACGACAAAGATGCAGTATCGAGCGCAACTATTGCTACTACGACGATTG  
CTTCATCGACGACGATAATGACAACAGCAGCGACGGCCACTGTTGCGACGGGGATAAC  
GATGACGACGACGACGACTAAGATGGGAACAACGAGTAGCCCTGCTCACGGGAATTC  
GGAGGAATACGACTTGGAAGCGCGGTGCTAGTAAAACGACAATTCGTTATTTCGAGAG  
TTGGTCGAGACGGAAGGATTATGTAAATGATTTGAAGCAAATAGTCGAAGGGTACA  
TGGCATTGATGCGAGATTCTGAATCTCAAGTGCCATTGCCAGATGATTTACGCGGTGGA  
AAAGACAAAATGGTTTTTGGTAACATAGAGGCAATCTACGAATGGCATAGAGATTTCTT  
TCTGAAAGCTTTGGAACGTTGCTTGGAACGGCCGGAAGAGCTTGGGCGGTTGTTTAAAG  
CGATACGAAAGGAAGTTACATATGTATGTTGTTTATTGTCAAAACAAACCAGTCTCCGA  
GTATATTGTTTCTGAGTATATAGACACCTATTTGAGGATTTGAGGCAAAAGCTCGGAC  
ACCGATTACAATTATGCGATCTTTTAATCAAACCGGTTCAAAGAATCACAAAGTATCAA  
CTTCTTCTTAGAGAGGCATTAAGACTTACCGAACGAACTCAAAGAATTTTCGGAAATCG  
AAGGACTTAGAGCAGCGGTTTCATGTAATGCGTATTATTCCAAAAGCGGCCAATGACATG  
ATGGATGTTGCAAGACTTCAAGGTTTCGACGGAATAATTACAGCGCAAGGAAAATTAT  
TATTGCACGGACCACTTTTAGTCTCAGAATTTTCTTCAATTTACCTAGTAAGGAAAAA

GAATGGCAAGTCTTCCTGTTCTGAACAAAATATTATTTTATAGTGAAGCTGTCGGAAAAAA  
GACACAATTCACCAATCCTGTCTATATTTACAAGGCTCATATTCAGGTGAATAAAATGAG  
TTTAGAAGAATGTTATGATGATTCGGAGAAGTTTATAATTTCGATCAACAGATCCTCGAA  
AACCTGGCCTTGGAATTCTCTTGTAGCGCAGTAGAAGAAAATGGGCCACGGAAGCAGG  
AGTGGGTAGATACGATCACTGCCATCCTGCAGACCCAACGTGACTTCCTTAAAGCGATA  
CAGTCACCAATTGCCTACCAAAAGGAACTTACCAAAGATCCATTCGTGGCGTGAGTC  
CGGATTCTCCGTGTCGAGGGAGTGTACTTTCATCAACAATACCGAACATGTCTAAAACG  
AACGAAGAACGGAGAAATGAAATCGCTGCTACTACCTCTTCAAAAGCATTAGCTACAG  
CTGCAGCAGCGACAGCTACGGCAACATCGGTTTTACAGCGACCTCGTACTGGAGGCTT  
GGATCAGGATTCTTCGCAATCGCCAAGTCTAGCAAAAGCAGACTGAACTTTCTCGAA  
GGATTCAGAAGTACTCTACGCCCACGATCACCTGTTCGCAACAACTCTATTCCG

>novel\_circ\_000104

ACTGGCGTAGCCGAGGTGACCTGGGTGATTGCCGATCACTCTGCAGCACCGGGTTCTGA  
AAGAGTTGACGGTAACGAAAGGCCAACAAAGTTGAAGTATTAGAAAATGGAAGTAACA  
TCAGCGGTGTGAATACATCCGAGTGGACTCACGTGCGTTTACTAGTTGCTCCAGGACA  
AGTTGATCCTCCTCCAGAAGGATTAGTTCTACTAGTGCCTTAAACAACCCCCCTCCAG  
TTTCTAGTAAAACTTCACCATCTAGGAAAGTTCCAGGACAGCAGCAGCAGCAACAACA  
ACAACAGCAGCAACAGCAACAGCAGCAGCAGCAGCAACAACAACAATTACATTATCA  
ACAACAATCGAGTAGTCAAGTTCAAACCTGTGCGATCCAGTGGAGGATTTGCAACTGCG  
TCCTCTGCTGCTGGAGTAGCAGGCTCTTCGTCGACTGTTGCAACAAGTGTAACACCTG  
TGTTACCAATTCAAAATGTTCTGTGTTGCCGGATGAAACTGAAAACGTTGCAAACGA  
TGGAAGTACTCCTGCGAACACAAATTCTCCAGGAAACAAAAGGCGTGGCTTTAGCGG  
GAGAAAGTGGTTACCTCCACCATTGCGTAAACTTAGTCAAGGTAAAGTCGAGAAATCG  
CCACCGACGACGACAGCGACAGCGACATCGATGACATCGATTGTACCGCCATCAGGTG  
ATCGGTTGAAAAAGAATGTCTCGGAAAAACGATTCAAATTACCGACTGGTGCGGAACA  
ATCTCGACCGTCCAGAAGTCTTCTATTTCTATCTCCGCGTTAACAACAGCGACTGCCT  
CTATGCGTGTGTCTGCTTCTGAAGCGGACCTTGACACTGAACTTCAACCAGGAATCGA  
AGGAGAAGAGGACGAAGGAGAAACGGAACAATCGGAACCAGAATTGGAAGAAGATG  
TACCGGAACCCGATAACACAGAAGCTTTAACTTACTCGGAACAAAATGGAGCGGACGA  
TGTCGAAGACGAATTAGAAGTTCTTCCGCCGATGAAACCCATCACTGAACCGATACTT  
GTAGGAACTGCGAATGGAGCATCGGGATCAGCAATTACAACAGAAGGCTGTGGAAAA  
TCTCGAACATCTGAACGTTCAACGAAGATTCTTGACGGTGCCACGACGGTTGATTGG  
CTGAAATTGAACAGATCGTAAAAGAAAGAATGGAACAACATACGGAACCAAGAAA  
GACAAAGTCTGATGCGAACACCTAGTGGTAAAAATTCAAGCATTGGTGGCAGTGGGGA  
TAACGATTACGACAAAGATGCAGTATCGAGCGCAACTATTGCTACTACGACGATTGCTT  
CATCGACGACGATAATGACAACAGCAGCGACGGCCACTGTTGCGACGGGGATAACGAT  
GACGACGACGACGACTAAGATGGGAACAACGAGTAGCCCTGCTCACGGGAATTCGGA  
GGAATACGACTTGGAAGCGCGGTGCTAGTAAAACGACAATTCGTTATTCGAGAGTTG  
GTCGAGACGGAAAAGGATTATGTAAATGATTTGAAGCAAATAGTCGAAGGGTACATGG  
CATTGATGCGAGATTCTGAATCTCAAGTGCCATTGCCAGATGATTTACGCGGTGGAAAA  
GACAAAATGGTTTTTGGTAACATAGAGGCAATCTACGAATGGCATAGAGATTTCTTTCT  
GAAAGCTTTGGAACGTTGCTTGGAACGGCCGGAAGAGCTTGGGCCGTTGTTTAAGCG  
ATACGAAAGGAAGTTACATATGTATGTTGTTTATTGTCAAACAAACCAGTCTCCGAGT

ATATTGTTTCTGAGTATATAGACACCTATTTTCGAGGATTTGAGGCAAAAGCTCGGACAC  
CGATTACAATTATGCGATCTTTTAATCAAACCGGTTCAAAGAATCACAAAGTATCAACT  
TCTTCTTAGAGAGGCATTAAGACTTACCGAACGAACTCAAAGAATTTTCGGAAATCGAA  
GGACTIONAGAGCAGCGGTTTCATGTAATGCGTATTATTCCAAAAGCGGCCAATGACATGAT  
GGATGTTGCAAGACTTCAAGGTTTCGACGGAAAAATTACAGCGCAAGGAAAAATTATTA  
TTGCACGGACCACTTTTAGTCTCAGAATTTTCTTCGAATTTACCTAGTAAGGAAAAAGA  
ATGGCAAGTCTTCCTGTTTCGAACAAAATATTATTTTATAGTGAAGCTGTCGGAAAAAGA  
CACAATTCACCAATCCTGTCTATATTTACAAGGCTCATATTCAGGTGAATAAAATGAGTT  
TAGAAGAATGTTATGATGATTTCGGAGAAGTTTATAATTCGATCAACAGATCCTCGAAAA  
CCTGGCCTTGGATTCTCTTGTAGCGCAGTAGAAGAAAATGGGCCACGGAAGCAGGAGT  
GGGTAGATACGATCACTGCCATCCTGCAGACCCAACGTGACTTCCTTAAAGCGATACA  
GTCACCAATTGCCTACCAAAAAGGAACTTACCAAAGATCCATT

>novel\_circ\_000105

AGTCAAGATGGACATGGCATTGATGGGCATTCTGGTATGAGTGGGAATCCTGCTGCGGA  
TTATAGCGAAGGTGCGTCTCATGTATTGGCAGTGATCCATCAAATTTTGGGTCATCATAG  
AGCGTTGGAAGCTCGTTGGCATGCTCGAAAAGTCAAACCTGCATCAACGACTCGCGTTA  
AGATTATTTCAAGAAGATGTGAAACAAGTTTTGGATTGGTTAACTAATCACGGCGAAGT  
TTTTATTAGAAAAGAACACAGGTGTTGGTCGTAATCTTCAAAAAGCGAGAGTATATCAGA  
AAAGTCACGAACATTTTGAAAATGTGCGACAGAATACATATACGAATGCTACTAACTA  
CTTACTGCTGCACAAGAATTGGCGCATACTGGTGAATGTGCTGCTGATGAGATATATGC  
TGTAGCGCAAGAATTAGAGGCTCACGTCAGTAGTTTTGCGGCAAGAGTCGAACAACGT  
CGTCGAAGATTAGATTTAGCAGTTGTATTTTATACACATGAAAAAGAGTTAAGTGGTTG  
GGTTGACGAATTACGACAAGAATTACAACAAGACGAAGTGGCGGAGAATTTAGAAAC  
AGCGGAAAGATTGTTGGAACAATGTGCACAACATCGAGCCTCTTGCATGGAAGCATGT  
GCATCGACTATTGTTTCAGGGAGAAGCATTGCTTCGAGAATTGCGAGAATCTACTGATGC  
TCCTGATACTACTGGCTCTATATCTGCGGTAGAAGCTGCATTAGATAGGTTAGCGAGCTT  
AAGACAGGAATTAGAAGATTTATGGGCTACTAGAAAATTAAGGCTAGAATTATGTTTAC  
GACTACGAGTATTTGAAAGAGATGCTCTAGAAGCGAGCGGTCAATTAGAGATGTGGGC  
ACAAGAATTACAAGGCCCATCTCGAGAAGGTTCTCCTGAACAATTATTACGTGCTCATA  
ATGATGGTGTGCTCATATGCAGAATACTGCATTTCAAGTTCTGCAACAAGGTCAAGAA  
CTTGCTCAGGTGTTGGAACAAGCAGGAGTTTGCATAATGGCAGATGGACAACATAGTG  
CTGCAACTAGAGTACAAGTGCTTCTTGAATTTTTAAACGAAAGAGAAATGGATGCGGA  
AGATTTAGCGGAGATGAGAAGAGTTCGTTTAGAACAAGCTTCTCAACTGGTTCAATTA  
CAAACCGATGCTACACATGTTGCAAATTGGATTTCGTAATGGAGAAGCTATGTTATTAGC  
TTCTTTGAGAGTTCCGGAAAATCTTCAAGATGCAGAACAGCTTCGTTTAGAACATGAA  
CAGTTTCAAGTCGCTATAGAAAAAACACATACTTCAGCTGTTCAGGTAAAACACAGAG  
CAGATGCGCTAGTGAGTGCTAATCATTATGACCCAAAGAGTATAAGAGAGGTAGCTGA  
GGATGTAACATAAAAGATGGCAACAACCTGTGACGTGTGCAGAGGAAAGACATAAACT  
AGTAACAGCTAGCATTAATTTTTACAAAACGGCAGAACAAAGTCCGTTCCGTATTAGATA  
GTCTTGAACGTGAATATAAAAGAGACGAAGATTGGTGTGCTTCTGGTGAAAAAGCTAC  
ACAAGTTCCAACACTTGTGGCAACATCAAGAACAAAAAGAAGCATTTTTTAAAGCA  
TGCACATTAGTACGGCGAACTGCGGAAACATTTCTTAAATATACGAATCGTAGTCTTCA  
ATTTTATAGTTATCAGGCAAATAGTGCTGGCTCTGAGAATAAAGTTAAAAATATTTTGA

GGAGTTACTTAGTAAAGAGAATCGTGTGCTCGAATACTGGACGCAACGTAAGAAACGA  
TTGGATCATTGTCATCAGTATGTTCTGTTTGAGCGTAGTGCTAAACAGGCTTTAGAATG  
GATTAGAGAAACGGGTGAATTATATCTAGCAACACATACCAACGTTGGTAAAAATCGTA  
TCGAAAACGAACAATTATTGCGCGAGCACAATGAATTTAAAGGTGCTGCGAAGGAAAC  
ACGAGAAAGAGTAAAGCTGTTGATTCAACTTGCTGATAATTTAGTCGAGAAAGGACAT  
GCTCATGCAGTGGCAATCAAACAATCTGTTGCTGAAGTGGATCAACGATATAAGGATTT  
TAGTACGCGTATGGATTGTTATAAAACACAAATTGAAGAAGATCTTGGAATTCAATCAG  
ACGATGGTCAAAAAGGATCTTTCTATCGATCGCAATTCCGATCCGTTACTCGAGGAAAAG  
ATCAAAGGAAAAGATTTAAAAGAATTAAACGAAGAAAAAAGAAGATCAGCGCGGCGA  
AAGGAATTTATAATGGCTGAACTGCTACAAACAGAACGAACTTACGTGAAAGATTTAG  
AAACCTGTATTCGATGTTTTTTTGAAGAAACACGTTGTGGAAAAGGAAATGTTCCATCT  
GGATTGCAAGGACGAGAATCTATAATTTTTAGTAATATGGAAGAGATTCATCAATTTAT  
AGTAACATATTTCTTCGTGAACTTGAAAAATACGAACTATGCCCCAAGATGTTGGACA  
TTGTTTTGTAACATGGGCACCTAAGTTTGATATGTATGTGACATATTGCAAGAATAAACC  
AGAAAGTAATCAATTGTTAGTTACTCATGGTGGGACATGGTTTGAAGAATTACAAAGA  
AAACATCGAGTTGAACATCCGATTGCTGCATACTTAATTAAACCCGTACAAAGAATAAC  
AAAATATCAATTATTATTAAGATCTTCAGGCCTGTTGCCAAGAAGGACAGGGCGAAA  
TAAAGGACGGCCTTGAAGTAATGTTAAATGTGCCTAAGAAAGCAAACGATGCCTTACA  
TTTAAGTATGCTGGAAGGTTGCGATGTAAGAATAGATACATTAGGTGATGTAGTATTACA  
GGATTCTTTTACGGTATGGGATCCCAAACAATTGATTAGAAAAGGCAGAGATCGGCACA  
TATTTCTATTTGAATTATATCTGCTCTTTAGCAAAGAAGTGAAAGATTCGGCTGGGAAGG  
TGAAATACATTTACAAAAGTCGTTTAATGACTTCTGAGTTGGGTGTAAGTGAACATATT  
GAAGGTGACGAATGCAAATTCGCAGTATGGACAGGTCGTGCACCGACTAGCGATACAC  
GCGTTGTTCTTCGAGCCAATTCAATGGATGCTAAGCAATTATGGGTGAAAAGATTACGC  
GAAGTTATTCAAGAAACATATTTAGTTTAAGTATGCCAAGAGTCCTGCGAAAAAAA  
GTTCAAGTCAACGATCCAGTAGAGATCTTGAAGAATGTACTTCTTTGGATGATAGTGTC  
GAGAATTTGGATAGAAATTCCTTGGCATCTTTTGGCTCTACTAATACTACAGACTCAGAT  
AAAACCTGGCGTAGCCGAGGTGACCTGGGTGATTGCCGATCACTCTGCAGCACCGGGTT  
CGAAAGAGTTGACGGTAACGAAAGGCCAACAAGTTGAAGTATTAGAAAATGGAAGTA  
ACATCAGCGGTGTGAATACATCCGAGTGGACTCACGTGCGTTTACTAGTTGCTCCAGG  
ACAAGTTGATCCTCCTCCAGAAGGATTAGTTCCTACTAGTGCGCTTAAACAACCCCCCTC  
CAGTTTCTAGTAAACTTCACCATCTAGGAAAGTTCCAGGACAGCAGCAGCAGCAACA  
ACAACAACAGCAGCAACAGCAACAGCAGCAGCAGCAACAACAACATACATTA  
TCAACAACAATCGAGTAGTCAAGTTCAAACGTGTCGCATCCAGTGGAGGATTTGCAACT  
GCGTCCTCTGCTGCTGGAGTAGCAGGCTCTTCGTGCGACTGTTGCAACAAGTGTAACAC  
CTGTGTTACCAATTCAAATGTTCTGTGTTGCCGGATGAACTGAAAACGTTGCAAA  
CGATGGAAGTACTCCTGCGAACACAAATCTCCAGGAAACAAAAGGCGTGGCTTTAGC  
GGGAGAAAGTGGTTACCTCCACCATTGCGTAAACTTAGTCAAGGTAAAGTCGAGAAAT  
CGCCACCGACGACGACAGCGACAGCGACATCGATGACATCGATTGTACCGCCATCAGG  
TGATCGGTTGAAAAAGAATGTCTCGGAAAAACGATTCAAATTACCGACTGGTGCGGAA  
CAATCTCGACCGTCCAGAAGTCTTCTATTTCTATCTCCGCGTTAACAACAGCGACTGC  
CTCTATGCGTGTGTCTGCTTCTGAAGCGGACCTTGACACTGAACTTCAACCAGGAATC  
GAAGGAGAAGAGGACGAAGGAGAAACGGAACAATCGGAACCAGAATTGGAAGAAGA  
TGTACCGGAACCCGATAACACAGAAGCTTTAACTTACTCGGAACAAAATGGAGCGGAC

GATGTCTGAAGACGAATTAGAACTTCCTCCGCCGATGAAACCCATCACTGAACCGATAC  
TTGTAGGAACTGCGAATGGAGCATCGGGATCAGCAATTACAACAGAAGGCTGTGGAA  
AATCTCGAACATCTGAACGTTCAACGAAGATTCTTGACGGTGCCACGACGGTTGATTT  
GGCTGAAATTGAACAGATCGTAAAAGAAAGAATGGAACAACATACGGAAAAACCAAGA  
AAGACAAAGTCTGATGCGAACACCTAGTGGTAAAAATTCAAGCATTGGTGGCAGTGG  
GGATAACGATTACGACAAAGATGCAGTATCGAGCGCAACTATTGCTACTACGACGATTG  
CTTCATCGACGACGATAATGACAACAGCAGCGACGGCCACTGTTGCGACGGGGATAAC  
GATGACGACGACGACGACTAAGATGGGAACAACGAGTAGCCCTGCTCACGGGAATTC  
GGAGGAATACGACTTGGAAGCGCGGTGCTAGTAAAACGACAATTCGTTATTCGAGAG  
TTGGTCGAGACGGAAAAGGATTATGTAAATGATTTGAAGCAAATAGTCGAAGGGTACA  
TGGCATTGATGCGAGATTCTGAATCTCAAGTGCCATTGCCAGATGATTTACGCGGTGGA  
AAAGACAAAATGGTTTTTGGTAACATAGAGGCAATCTACGAATGGCATAGAGATTTCTT  
TCTGAAAGCTTTGGAACGTTGCTTGGAACGGCCGGAAGAGCTTGGGCCGTTGTTAAG  
CGATACGAAAGGAAGTTACATATGTATGTTGTTTATTGTCAAAACAAACAGTCTCCGA  
GTATATTGTTTCTGAGTATATAGACACCTATTTGAGGATTTGAGGCAAAAGCTCGGAC  
ACCGATTACAATTATGCGATCTTTAATCAAACCGGTTCAAAGAATCACAAAGTATCAA  
CTTCTTCTTAGAGAGGCATTAAGACTTACCGAACGAACTCAAAGAATTTCGGAAATCG  
AAGGACTTAGAGCAGCGGTTTCATGTAATGCGTATTATTCCAAAAGCGGCCAATGACATG  
ATGGATGTTGCAAGACTTCAAGGTTTCGACGGAAAAATTACAGCGCAAGGAAAAATTAT  
TATTGCACGGACCACTTTTAGTCTCAGAATTTTCTTCGAATTTACCTAGTAAGGAAAAA  
GAATGGCAAGTCTTCCTGTTTCAACAAAATATTATTTTATGTAAGCTGTTCGAAAAAA  
GACACAATTCACCAATCCTGTCTATATTTACAAGGCTCATATTCAGGTGAATAAAATGAG  
TTTAGAAGAATGTTATGATGATTCGGAGAAGTTTATAATTTCGATCAACAGATCCTCGAA  
AACCTGGCCTTGGAATCTCTTGTAAGCGCAGTAGAAGAAAATGGGCCACGGAAGCAGG  
AGTGGGTAGATACGATCACTGCCATCCTGCAGACCCAACGTGACTTCCTTAAAGCGATA  
CAGTCACCAATTGCCTACCAAAGGAACCTACCAAAGATCCATT

>novel\_circ\_000107

ATCGCGATCTGGATACGATTCTAGTAGCGGCGGAGAATCTGACAATGAATACAATGCTA  
TTGCATGTCGTGGAGCTGATACTCAATCTCAAAATCAGAACACAAATGCAAGCAGTCA  
TGGGCAGGGAAAGCATATAAACAAAGGAAGATGGACCAAAGAGGAGGATGCTGTATT  
AAAACAGTTAGTGAGCAATGCTGAACAACTTGGGACTGGGCTTCGATGGGACGCCATA  
GCCAGCCACTTTCCGGATCGAAGTGATGTTCAATGTCAACAGAGATGGGCGAAGGTCTG  
TAAACCCGGAATTAGTCAAAGGACCATGGACAAAAGAG

>novel\_circ\_000109

TATATGGATATCGGGGAAGATATTGGTGTCCCCGAGGATTTTACAACCTGGTGAGATGGT  
CTCCGGAATGTGGTGGCGACATTTGGTGTCCGGTGGCGTAGCAGGTGGTGTATCACGC  
ACATGTACTGCACCTTTAGATCGTATTAAAGTTTATCTACAGGTGCATGGAACACGACAT  
TGCAAAATCAAAAGTTGCTTCAGATATATGCTTCGTGAAGGTGGTTCTCTTAGTTTATG  
GAGAGGAAATGGTATAAACGTACTTAAAATCGGACCAGAAAGCGCTTTGAAATTTATG  
GCCTATGAGCAAATTAAGAGCGATTAAAGGAGATGATGTTAGAGAGCTTGGACTCT  
ACGAACGATTAATGGCGGGATCATTAGCTGGCGGAATTAGTCAATCAGCTATATATCCAC  
TTGAGGTACTCAAAACTAGATTTGCACTTAGAAAAACAGGAGAGTTTTTCAGGTTTAGT

AGATGCAACAAAAAAGATATATAAACAAGGAGGTTTAAAATCTTTTATAGAGGCTACA  
TACCTAATTTAATGGGAATAATTCCATATGCTGGTATTGATTGGCTGTATATGAACTTT  
GAAAAATAGGTATTTACGAACACATGATAAAAATGAACAACCACCCTTTTGGATACTAT  
TATTATGTGGAACAGCTTCAAGTACAGCCGGTCAAGTGTGCTCATATCCTTTAGCATTAA  
TTAGAACACGATTACAAGCAGATATATCACCAGGAAAACCAAATACTATGATTGCTGTT  
TTTAAAGATATTATTA AAAAATGAAGGAATTCGCGGTTTATATAGAGGTTTAACTCCAAAT  
TTTTTAAAGGTGGCACCAGCTGTATCCATTAGTTATATAGTATATGAAACTGTTAGAGAT  
TTTTTGGGTGTTAATATGACGTGATGATTATTTATTTTAG

>novel\_circ\_000110

AGCACAATTACAGTATATTTACAAAATCGTTTAAACATTTCATATATAATTATACGAATCTT  
CGCATATGACGGAAAGGCGATTTGATCAATTAGGGGAAGATTATTTTCGTAAAAACAATG  
TATTTTAAAGGACAGGAAAACATTAGGAGATTGAAGGGCTTTGCGAAAATGGCTTCATC  
TGGCAGACTGCCATGCCAGTTTGGATAGCTGGCTTAGAAATTGCGAGGCCTATCTCTCT  
TTGCTGTGAGAGGTTCTTTCCTAACTTTTTTAGTTTTTTTTTTTAG

>novel\_circ\_000111

AGATACATTTAAGTACCAGCCGACGCATGCCTCAGATAAAATCCACGACATTGCGAATA  
TTACAAAGTACCAAAAACTATTTTATCAATTTAGGCATTCGAGAAAAGTATAAGATTGAT  
TATTGAGAACATCTTGACATCATTAATATACTGTATTGATAAAACAGGTAATAATAAG  
GAAGTTTTGAATATCCTTCGAAGTTGCAAATACCGTATAAATATAACTGTGTGACGCTAT  
GGCCAAAAATATCACACGACTGTGTTAATATCGCAACCAAACGGCGATGAATGTGCAC  
GT

>novel\_circ\_000112

AAATGTCGAAAAACAATGAAAAAGAAGCGCATTAATTAGCCAATAATCGGAACGATGC  
ATCATGGCTTCGTCTTTAGGGGGACCAGGAATGGCGTCGGGTGTTCCGACACCGCGAA  
GAGTCAACCTGGAGTTTCCACCACCTCCACCTTACCCACCGCCTCACAGTCAGGTATAA  
TTTGCGATGGCCTGCACTGGATTAGTGGATCCTGGTCCTGTGGCGTCCGCAATGACGAA  
TCCAACCTACCAGCATCCCCTTCAGGATTATTCGTATGCTTACTTCGAACCTGGTCCGA  
GTCGGCTGCACGGCACATATCCGGCGGAAGTGGGCCTGAATCGTGTACAGCAGCAGCA  
ACAACAACAAGTGCGTCCGGATTCAATCAAAGGCATACATACATGACACGATACGGC  
ACGGAGGAGAATATTTACGAGGAGATATCGGAAATCAA

>novel\_circ\_000113

AAATGTCGAAAAACAATGAAAAAGAAGCGCATTAATTAGCCAATAATCGGAACGATGC  
ATCATGGCTTCGTCTTTAGGGGGACCAGGAATGGCGTCGGGTGTTCCGACACCGCGAA  
GAGTCAACCTGGAGTTTCCACCACCTCCACCTTACCCACCGCCTCACAGTCAGGTATAA  
TTTGCGATGGCCTGCACTGGATTAGTGGATCCTGGTCCTGTGGCGTCCGCAATGACGAA  
TCCAACCTACCAGCATCCCCTTCAGGATTATTCGTATGCTTACTTCGAACCTGGTCCGA  
GTCGGCTGCACGGCACATATCCGGCGGAAGTGGGCCTGAATCGTGTACAGCAGCAGCA  
ACAACAACAAGTGCGTCCGGATTCAATCAAAGGCATACATACATGACACGATACGGC  
ACGGAGGAGAATATTTACGAGGAGATATCGGAAATCAACAGACAATGTCATCGAGCGT  
TGCACGGTTCGAGAAGATCCCTGGTGGCGGAGGAAGTGCGACGTGTTCAAGTCACGGC

ATCGTCGAGTATTAGGAGAATTGAACCTGAGCGTGGAGGCGATGTTAATGCCACGGT  
GGTCGATAACAACAACGAGGACGAAGCACAGGATCAACGCGGAGCATCTACGGAGGA  
ACTGTTATCCTCGGTCAGTCCCACCGATGACCTCCTTTCGCCTGTTGGCTGTGACATGG  
ACAGTGGCTTCAGTGGAAAGCTCCAGTGCAAGTTACAGGTCTGGACTAGGATCGTTGAG  
GAGAGGAATGGGCAAGACTAGTACTCCGGAATTAGCAGGCGGGCAACGTAAAACGAA  
GGCAGTTATGATCTGGAAAAAGGGTTGGAAAGGTTGGAAGAACTGCATTCTTTCGGA  
ACAATAGCAACAAGACTG

>novel\_circ\_000114

GATTTACTGAAACATACACCGCAAGGTCATCATGATAGAATGTCGCTGCAATTGGCATT  
AACTCAATTAGAAAGTTTAGCAGAAATGTTGAATGAAAGAAAACGGGAAGCAGAACA  
ATTCCAAGCATTAAAGAAATGCTTCGGCATGTATCTGGAAAATCTCTACCGTCCTC  
TTTCATCTTCATCTAGATATTTAATAAGAGAAGATAATGTTACACAGTTGGAATTTAATCA  
AAATGGCATGATAACAAAATCAAAAAGGAGAAGGTTATTACTTTTAAATGATCTCGTAG  
TATGCGTTTCGGTGACCCCAAGATCTGCAGAAGATTTTAGTGGTAGTGAAAGACTAACT  
TTGAAGTGGACATATCCTGTATCAGATATTGAG

>novel\_circ\_000115

ACTAATGAGAGAAAGTACATTTGTATGTACATGAATTAATGATCTGACCATGACAAGTA  
ACGTAGCAGCAATTAAATTAGAAGAGGGGCAAGAATCCGTAACAGAGATACAGACTTA  
TTTAGAAACATTTAATAAAGAAATAGAAGGAGGTCAGGGAGAGCAATTACAACATGTA  
CAATTACAACAAGTGGAAGGATTATCAGGTGGAGAAGAGGGTGGGACTTATTTTGTG  
ATCAATCTGGACAATATTATTATCAAGCAAATAATGATGAAACACCTGTGATGACACAG  
GTACAAATTCAAGAAGTAGAAGAAACAGATGTACAAAATGATGGAGAAGCAGCTCAA  
GAAGAACAATATAATGAAATTGAAGAATTAGAAAATGTTGATGGTGATGAAGATAGTCA  
TGTAAC TAACGGTGGAATAATCAAGTTGTAATCAATTCTGGAGATGCATATCAAACAG  
TTACTATTGTACCATCTGATACAAATCCAGGAGAAGTTAGTTATGTATTAATAGTTTACG  
AACCTGATGCTGAAGACAAAGAAAGCAGACCTGTAGAACGAGAGGGAACAGAAGGA  
GAAGAAGGGGAAGGGGAACAAGATCTTACAGTTTATGATTTTGAAGATAATGAAGATA  
ATGAAGCACCTGTAGAATCAGAAGCAGAAGATGACAAAACAAAATTATTAAATTTT  
ACCTAAAAAGTCTCAAACCTGTTACTCAAGCTCATATGTGTAATTATTGTAATTACACAAG  
CCCAAAAAGATATCTGTTATCACGGCACATGAAATCACATTCTGAAGAAAGACCACATA  
AATGTAGTGTGTTGTGAAAGAGGATTTAAACATTAGCTTCACTTCAAAATCATGTTAAT  
ACACATACTGGGACCAAACCACATCGTTGCAAATTTTGTGATAGTGATTACAACTTC  
TGGTGAACCTTGTTAGACATGTTTCGATATAGACACACTCATGAAAAACCACATAAATGTC  
ATGAATGTGATTATGCATCTGTTGAATTATCTAAGCTCAAGCGTCATATACGATGTCATAC  
AGGGGAACGTCCATATCAGTGTCCACATTGTACATATGCAAGTCCTGATACTTTTAAATT  
AAAGCGACATTTGCGCATACATACCGGAGAAAAGCCATACGAGTGCGATTTTGTGAG  
GCAAGGTTTACCCAATCTAATAGCTTAAAAGCTCATAAATTGATACATAATGTTGGTGAT  
AAACCAGTATTTCAATGTGAATTATGTCCAACCACTTGTGGAAGAAAAACAGATCTCA  
GAATTCATGTACAAAATTACATACCTCTGATAAACCTTTGAAATGTAAACGTTGTGGA  
AAAACATTCCCAGATAG

>novel\_circ\_000116



GTGATACCGGCAGAGCGGCGTGGGCCAGAGAAGGAAGAGACCTGGACCCTGGCCCCG  
GACCAAAGCGGGGTGGACGCGTGTCCGTTCCCTCGACGACGTTCTATCCGACATAAAAT  
CGAAACCGATCCAAGATGACAATCCCCAACCCCGTATCCACGATCCTGGCGATACCCA  
AAGCCAAAGCAACCAACAGTTGGAGCATCCTGACTGTGGAACGTTGCCGCGCAGCCA  
GGAGACGAGGAAGAGCAAGACGAAAAAGGTGAAGAGTTACCTGAGGAAGTGCAAAG  
GCGCTCTGTCGAAAGCCGACGAGGCGTCCACGGAGAAGAAACGCCAGGAGCACTGC  
ACCTCTTGGTATCTGGACGAGTCTCATCAGGAGGAGGATAATCCTGTGATGGAGATTCA  
GAAACAGAATTCGGAATTGCTCGAGGAGAGGATCGCCGAGGAGGAGGCCTCGCCGCT  
CGAGGACGGAAGAGGAGAGGATCCCTCGAATCTCTCGAAGGAGGAAAGTCGGGAGG  
ACGAGGAGAGTGTCTCGAGGCTGGCCGAGGATCTGAGGAGGAGCCGGACGTCCTTGT  
ACGAGGACGCCAGGGATTCCATGCACGACAGAGAGTGCAGCAGCGAGCGAGGAGGGC  
TGCTGCAAGCGGGACGACGCCATCTCCCTCGAGACACTGACCACGGAGGAGACGACG  
AATTTGAACAAGTGCGACTCGAACGACACGCTGATTGCGTGTGAAGTGGCGGCCCCC  
AACGGCCCCGCCGCCCTCGTCGAGGAGGGAAAGGAGGGAGAGGAGGCGGACGGCGA  
GATGCAGGCCCTGTCTCTGTTTGGG

>novel\_circ\_000117

GGGAACGAGTCGGTGATACCGGAAGGTTGGCCTCTGACGTTGGGCAGACGTGGCCTC  
GTCCTGCAGCTAGGAGAGCTCGAGGCCTCCGCGCTACGTCTCGGGGAATGTTACCTTT  
GCATACGCAGCGCAGCTGCAGTTGCAACCACCTCAGGGAGCGGCGAAGTTGCCGCTG  
GTGACGAGCGGAATACCGTCGAGATTGCAGTAGTTTGGCGAACGACGTGCATGAGGG  
CCCCAGGTTTCCTCGGCTGGGACCGCGAGGAGGAGTTCATGGACTGGCGGGAGGTGT  
CTCGAAAGGGGGCAGGGGAGCAGCGACGCGGCGAGCGGCAGCCTGGCCGGGCGCGAA  
TCGTGCGGGCACGGCGAAGAGCATGCGGCCAGGCGGCGTTCGCGCGAGGAGGCTCGC  
TCGCGTACGCGCGAGCAGGGCTTCGTGCTGGACCACCGCCGCGAGGAGACCCGTTTCG  
ATCGATCGTCTCGAGTGCAACAGCTCGAACGGGGGGGGCGCGAGGGGGGAGGAGCG  
GAGGAAGAAGAACGAGATGGACGGCGGCCACGCGGTGATGAAGTCGAGATCTACGTC  
GAGCGTGGGCCAGTGGAAGGCGGAATTGGAATCTTCGCTGGGCGAATCGAACGGGGC  
GAGCAACCGCTCGAACCAATCTTCTAGTCTTTCCGGCGACGAGAGCCGCGCCAAAGTG  
AAGAGGTGCGCCAAGGTCGTCTCCTCGATGACCATGGAGAAGTGGAAGGAGACGGCT  
AGGTGCGAGACCAGGAGCAAACCCCTAGCGCCGACGACTTGAAGACACCGTCGAGA  
CTGTTGGACGTTGAGGCTGCCCTCGAGAAGAAGCGAGTAGGGGCCGCGTCGGGGGAA  
GGCGAGAACAGGTTGCACGGGTCGAGGAGCGTGACGAAGTGAGGATGACGAGCT  
GCCGGCTTTCATCGGCAATCTTTTGGTCTCCGTGGAGAGGAAAATCGAGAGAGTTTCC  
CTGGACGATTTGACGTTCCCTTGCCCAGCGTGCAGGAATATAGACACCGACGATCCGTT  
GCTGGGTTGTAGGTGCGCCGGTGACGATTGCAGCTGCGGCGAGGATACCTGCGATTGT  
TCGCCCTCGGCCAACGCGAGGAAGGAACAATCGACAAGGAGCTTCGAGATCGCTGGT  
ATCAAGCACATAGACAGCGACGACGAGGAGGAGGTGCGGATGGGATTTCG

>novel\_circ\_000118

TGAGAAAAGCAAAAATTCCGAAGTATTCAAGGCTTTCATAGCAGAAGTATCTTCGTCTA  
AATATTTTGATTTTACAACAGTATTTTGAAGAATAAACATTATAAGAATTTGGAAAACG  
AGGCCGTAAATTTGGGCGTAACTAGAAATGATTTCTATACTTTTTCTCCCATCTTTGTTT  
TCGTTACAGCAGCATTCAATTTGTAAATAACAATGATTTTGATTAATTAATTTATAAAAAA

TAATTCATTTTATTCTTATGTAGAAAATTTTATGTTGTTTTCTTTTTCTTAAAAAAATAA  
AATATATTTATATTAGATTAAAAAAATTAATTTTTCTATTTTTTATTTATCCTATTTATCTAT  
TCTATTTCTTTTACACTTACAGGATTAATTTTTTTTTTAAAATTGAAAGTAATTATTCTTCTT  
TGTCATTTATTTCCACAGAAATCTATTCTTTTTCTATATTTTTTTATATTTTTGTAAATGT  
ATTAAAATTAAGATTTATTTGGAAAGATATCATTGTAGAAAAATATATTCATTAATTAATTA  
TTTAATAGTATTATATTATATATATGCAATATAAAAAATTGAATATGAAAAAACTGAATATG  
AAAAAATTGTGAACTTAATATGAAAGAGTTGTTAGTAAAAATTTTTCTTCTTTTCTGAA  
ATGTTATATATATATTTGAAAATCAATTGTTTTAGAAAAATTTTATAATAGCTTAAAAAAC  
TATATTATAGAAATTTTTTTATTATTTTAAATTCTAAAAGCTATGTTGTACATGAATTAATA  
ATTAGAAATATTAATAAATTAGAAATTTTTTAAACAAAAAAATATATTTATATAATTACTTTT  
CATGAAAAGAAAATGTATAAATTTATTCAAATTTCTAAGACATTCGTAATGTTTTGCGAA  
TAATTCATTTAATTTACTTTTTTATATTTGAAATTTATGTAAATTATATTGCAAATAAAAA  
TAATTACAGATTGACATATATTGCATTAATTTAAAATGAAATAATTTAAAATGAAACGCA  
AAAATTAAATTGTTTGCAGATTAAAGCTATGATTACTTACTTAAATATTATTACCTGATTC  
TAAAATACAATTTAAAAAATATCAAAGGAAATTGTATAAGATTTTAGTTCTTATACGATT  
TTTTTAGAAAAAAAAGAAGAAATTAGAGAAAATAAGTATTCTAATTTTTAATAATAAAA  
TTTTATAAAGATTCGGCTTTGAATTTTATAAATTTGATTCATATTCATACTACTTTTAATA  
TTTTTAAATCTTAATTATTATTTGAAAATTGTGAAATTGATGTATATACTATAATGTATATA  
CTAAAATGATAAGATGGCTTATATTTCTTAAAATGATTAGTATATTATATTATTTAATATTT  
TAATTTAATATTCAATTTAAATAAAAAAAATATATTTGTAAACATAAATACATAAATATTT  
AGAATATTAAAGAACAAAAGAAAAAATAATTAATAATAGATTTTGAAAAAAAATATA  
GTAAATTTTATATATCTATTTATGAATTCTAAATATTTTGTTTCGATCAAAATATTCGATT  
CTGTTCAAAGTGTGATATAATGTTATTAGTCTAATAAAAAAAAATAATAAAAAAATTATT  
TTTTTTTTTCATATGAAATATTTTACATTCTTAACACTATATTAAAAAAATTCTGAATATCC  
TTAGTGAAATCAAGTCAAATATTTATCTTGTATATGATGTACCTGATATTTAACGCATTTA  
ATATTATTGTGCTTTTCTCCTGAAGTATTATAATTTTCTTATTTTGAAAAATCATTTAAAA  
ATTTGCATCGGAAATAAATTTTGCATTAACTATTAAAATTTGTATATTAACATAATAACTA  
TTTTTTATCTATTCAATTTTTTTTAAACATTTTGTCTAAAATTCAATTAAAGACTTCTTTTTT  
CAATAATTCTTTCTTTATCAATGTTTTTAGAGAATATTAATAATAAACAGTTTGTTTTCT  
ATATTTTCTGATTTGTTCTTATTCTATAAGTTTTATTCCATAAAAATAAAAATCGAGCTATCG  
ATCCAAAAATCAATAATTATTCTCAGTTTTCTTTTTTTAATAACCATACAATAATTATATA  
TATTTATATATTAATATTATTATATAATTATATTAATAATTATATAATAATATTCATCATAACA  
TAAATATGATTTCTAAATATTATATATTATAACACATTAATACATTCTGAAAAAAAATCATT  
TTCTGATAAAATGTAAAAAAATTGTAATTTAAAAGATACGTAAATTTTCGGGTGTATTTT  
TAAGTATATTATTTATAGCATAATATATAATATCATTTTTATATTACATATAGTTTATCTGATT  
TTTAAATTGAAAATAAACAAAAATAACAGTTAATATATTTTATAGGAAATATACAATATAT  
AAAAATAATAAAAAATCAGAACATTTTATAGTTTTTACGATCATCTCATAAAATTATCCTA  
TGCATATTTTATTTTATTTTAAACATCTTAATATTAAAAAATATTTTCAAGATAAAATTAAATA  
TCAAAACATGCATATTTGGATGTTTTTAATTATTTAATGAATGGATACGTAAAAATATATG  
AAGGTCAATTTGTTTTTTTAAATAGAAATAATAGAATATATTTCTATATTTTTTAATGTAC  
TAATTGATGCGATTTCGATTTTTTATAAAAAAAAATATTAATTCATATATACTTAAAAATTA  
TTAATTTGGCAAATATTTTAATTTAAATTTTATAAAAAATTATTAATCTTTTAAAAGAAAA  
TAAAATATTTTATTTTATGAATTTCTTGTTTTCTCATAACAAATTTTACAAAATTTAAGTC  
AAAATATTTTTTAAATTAATAATTTTTTAGGCATATATGAATTAATAAAATTTTTAAGAAGA

AGAAGAAATATAATATTCCTCGTTTAAATGTAATATAATATCATTTAAATATTTTCGTCTCTC  
TATCTTGATATAAATTGAATTTTTCCAAAAATAAATCTGAATCTAAAGTTGAATTTGAAA  
AATTTTTCAAATGTTACTATTAAAAATTAAAAAATTTAAAGCAGATTTTAAATATTAATTA  
AAATTTTTTTTGTGTTTTGTGTTTTGAGTAATAATACCTGTAACAAAAATAATATGTATTCAC  
GGAATAAATACGTACAAAATCTATTACTATTTTACAAGAGTAATACGCAAATGTTTTCAT  
TTCCAATATGAAGTTGATTATAATATAAGATACTTGAAATCAATACGATGTAGTAGATGA  
GATATCTGACAAAAGTACCTGTTGATAATATAATGAGATAACGCATATAATCACAAAAGT  
TGATTAATCTTATCGAAAAATTTTTATCATATTTAAAGCTAGTATATAAAATGCAATGAAA  
AACGATTCATAGGTATAGTTTATATTAAGAAGAATAACAGAAATAATTAATTGCAATTATT  
TCACGATGAAATTTGCTTCGGCAATTTTTGTTATCCTGATTGCAGCCAGTCCCCTGAAC  
GCTTATAAAATTCCAGCCACTGGTTCAGGTGCTCTCGCCAAGGAAGTCCAAGACTTTAT  
AGACTTGATACCGCTCGACCAAATAATCCAAGTGACGAAGACGTACTATGCCCAGGAT  
ACGCAATTCCGTAACATTATTCAATTGATGAAAAGTGAAGAATTAAACAATGGATGCT  
AGATATCGAATCGGCTCCGGAATTCAAATTACTGATAAATTACGTTTCAAAAAATGGTC  
TCGATATTTATTACTTGGTTAATGAATTCAACAAATCTTTAAATCTTCCGCCTCTTGTTAG  
TGGAATTAAAGCCTTTTTTCGGTCTTTTCGACAATAAAATCACTGGTGGTTTTATCGGTTA  
TTTGATTGATATTGCTGCTCTTGTACCGCTAGAGAAGTTGTCTGATCTGTTCAC

>novel\_circ\_000119

ATAAACATTATAAGAATTTGGAAAACGAGGCCGTAAATTTGGGCGTAACTAGAAATGAT  
TTCTATACTTTTTCTCCCATCTTTGTTTTCGTTACAGCAGCATTCAATTTGTAAATAACAA  
TGATTTTGATTAATTAATTTATAAAAAATAATTCATTTTATTCTTATGTAGAAAATTTATG  
TTGTTTTCTTTTTCTTAAAAAAATAAAATATATTTATATTAGATTAAAAAAATTAATTT  
TTCTATTTTTTATTTATCCTATTTATCTATTCTATTTCTTTTACACTTACAGGATTAATTTTT  
TTTTAAAATTGAAAGTAATTATTCTTCTTTGTCATTTATTTCCACAGAAATCTATTCTTT  
TTCTATATTTTTTTATATTTTTGTAAATGTATTAATAAGATTATTTGGAAAGATATC  
ATTGTAGAAAAATATATTCATTAATTAATTATTTAATAGTATTATATTATATATATGCAATATA  
AAAAATTGAATATGAAAAAACTGAATATGAAAAAATTGTGAACTTAATATGAAAGAGTT  
GTTAGTAAAAATTTTTCTTCTTTTCTGAAATGTTATATATATATTTGAAAATCAATTGTTTT  
AGAAAAATTTTATAATAGCTTAAAAAACTATATTATAGAAATTTTTTTATTATTTTAAATTC  
TAAAAGCTATGTTGTACATGAATTAATAATTAGAAATATTAATAAATTAGAAATTTTTAA  
ACAAAAAAATATATTTATATAATTACTTTTCATGAAAAGAAAATGTATAAATTATTCAAA  
ATTCTAAGACATTCGTAATGTTTTGCGAATAATTTCAATTAATTTACTTTTTTATATTTGAA  
ATTTATGTAAATTATATTGCAAATAAAAAATAATTACAGATTGACATATATTGCATTAATTTA  
AAATGAAATAATTTAAAATGAAACGCAAAAATTAATTTGTTTGCAGATTAAAGCTATGA  
TTACTTACTTAAATATTATTACCTGATTCTAAAATACAATTTAAAAAATATCAAAGGAAAT  
TGTATAAGATTTTAGTTCTTATACGATTTTTTTTAGAAAAAAAAGAAGAAATTAGAGAAA  
ATAAGTATTCTAATTTTTTAATAATAAAATTTTATAAAGATTTCGGCTTTGAATTTTATAAAT  
TGATTCATATTCATACTACTTTTAATATTTTTTAAATCTTAATTATTATTGAAAATTGTGA  
AATTGATGTATATACTATAATGTATATACTAAAATGATAAGATGGCTTATATTTCTTAAAT  
GATTAGTATATTATATTATTTTAATATTTTAATTTTAATTTCAATTTAAATAAAAAAATAT  
ATTTGTAAACATAAATACATAAATATTTAGAATATTAAAGAACAAAAGAAAAAATAATTA  
AAATAGATTTTGAAAAAATAATATAGTTAAATTTTATATATCTATTTATGAATTCTAAAT  
ATTTGTTTCGATCAAAATATTCGATTCTGTTCAAAGTGTGATATAATGTTATTAGTCTAA

TAAAAAAAAATAAAAAAAAAATTATTTTTTTTTTCATATGAAATATTTTCACATTCTTAA  
CACTATATTAATAAATTCTGAATATCCTTAGTGAAATCAAGTCAAATATTTATCTTGTATA  
TGATGTACCTGATATTTAACGCATTTAATATTATTGTGCTTTTCTCCTGAAGTATTATAATT  
TTCTTATTTTGAAAAATCATTTAAAAAATTTGCATCGGAAATAAATTTGCATTAACTATT  
AAAATTTGTATATTAACATAATAACTATTTTTTATCTATTCAATTTTTTTAAACATTTTGT  
CTAAAATTCAATTAAAGACTTCTTTTTTCAATAATTCTTTCTTATCAATGTTTTTAGAGA  
ATATTAATAATAACAGTTTGTTTTCTATATTTTCTGATTTGTTCTTATTCTATAAGTTTTA  
TTCCATAAAATAAAAAATCGAGCTATCGATCCAAAAATCAATAATTATTCTCAGTTTTCTT  
TTTTTAATAACCATACAATAATTATATAATTTATATATTAATATTATTATATAATTATATTAA  
TAATTATATAATAATATTCCATCATAACATAAATATGATTTCTAAATATTATATATTATAACA  
CATTAATACATTCTGAAAAAAATCATTTTCTGATAAAATGTAAAAAAATTGTAATTTAA  
AAGATACGTAAATTTTCGGGTGTATTTTTAAGTATATTATTTATAGCATAATATATAATATC  
ATTTTTATATTACATATAGTTTATCTGATTTTTAAATTGAAAATAAACAAAAATAACAGTT  
AATATATTTTATAGGAAATATACAATATATAAAAAATAAAAAAATCAGAACATTTTATAG  
TTTTTACGATCATCTCATAAAATTATCCTATGCATATTTTATTTTATTTTAACATCTTAATAT  
TAAAAAATATTTTCTGATAAAATTAATATCAAAACATGCATATTTGGATGTTTTTAATTA  
TTTAATGAATGGATACGTAAAAATATATGAAGGTCAATTTTGTTTTTTTTTAAATAGAAATAA  
TAGAATATATTTCTATATTTTTTAATGTACTAATTGATGCGATTTCGATTTTTTATAAAAAAA  
AAATATTAATTCATATATACTTAAAAATTATTAATTTGGCAAATATTTTAATTTAAATTTTAT  
AAAAATTATTAATAATCTTTAAAAGAAAATAAAATATTTTATTTTATGAATTTCTTGTTTTT  
CTCATAACAAATTTTACAAAATTTAAGTCAAAATATTTTTTAAATTAATAATTTTATAGGCA  
TATATGAATTAATAAAATTTTAAAGAAGAAGAAGAAATATAATATTCCTCGTTTAAATGTA  
ATATAATATCATTTAAATATTTTCGTCTCTCTATCTTGATATAAATTGAATTTTTCCAAAAAT  
AAATCTGAATCTAAAGTTGAATTTGAAAAATTTTTCAAATGTTACTATTAATAAAATTAATAA  
AATTTAAAGCAGATTTTAAATATTAATTAATAATTTTTTTTTGTTTTTGTTTTGAGTAATAAT  
ACCTGTAACAAAAATAATATGTATTCACGGAATAAATACGTACAAAATCTATTACTATTTT  
ACAAGAGTAATACGCAAATGTTTTTCATTTCCAATATGAAGTTGATTATAATATAAGATAC  
TTGAAATCAATACGATGTAGTAGATGAGATATCTGACAAAAGTACCTGTTGATAATATAA  
TGAGATAACGCATATAATCACAAAAGTTGATTAATCTTATCGAAAAATTTTTATCATATTT  
AAAGCTAGTATATAAAATGCAATGAAAAACGATTCATAGGTATAGTTTATATTAAGAAGA  
ATAACAGAAATAATTAATTGCAATTATTTACGATGAAATTTGCTTCGGCAATTTTTGTTA  
TCCTGATTGCAGCCAGTCCCCTGAACGCTTATAAAATTCAGCCACTGGTTCAGGTGCT  
CTCGCCAAGGAAGTCCAAAGACTTTATAGACTTGATACCGCTCGACCAATAATCCAAGT  
GACGAAGACGTACTATGCCCAGGATACGCAATTCGTAACATTATTCAATTGATGAAAA  
CTGAAGAATTAAAACAATGGATGCTAGATATCGAATCGGCTCCGGAATTCAAATTACTG  
ATAAATTACGTTTCAAAAAATGGTCTCGATATTTATTACTTGGTTAATGAATTCAACAAA  
TCTTTAAATCTTCCGCCTCTTGTTAGTGGAATTAAAGCCTTTTTTCGGTTCTTTTCGACAAT  
AAAATCACTGGTGGTTTTATCGGTTATTTGATTGATATTGCTGCTCTTGTACCGCTAGAG  
AAGTTGTCTGATCTGTTCACTGAGAAAAGCAAAAATTCGAAGTATTCAAGGCTTTCAT  
AGCAGAAGTATCTTCGTCTAAATATTTTGATTTTTACAACAATATTTTCGAAG

>novel\_circ\_000120

GATTAAATCTCGAACCACTTAGAGATTTGATTGAGAATATTATTGGCATTTCATCTCCCTA  
GACCTTGAATCTATTCTAAATTTGTTATACGATAATAATAAATTTTAATTTAAGTTTGTTA

TAAAATTATAAAAAATCTCTAATCGTTTAAA

>novel\_circ\_000121

ATCCCAACATCCTGTTGAAGTCAGCGAAAAACAGCAGAGTTAGCCACTCTCTCCAGGTA  
GAGGGACTTGAGCTGGTCCTGAGGTATCAAAGCTTCGACTTCATCGAGGAAACCACGG  
ATTCCACCAATATTTTTGGTAGCATGGGAACCTGGTTTGAGCGATGGCAA

>novel\_circ\_000122

ACATGCTACGAGATGGAGAGGTACCTGAAGGACGAACCGAAACTGCAATCGTACAAA  
AAGTTGCCACACAGAGTTAGATACAGCACCCCTGGAATCTCTTCAGGCCTCCTATTTTCGTG  
GACAGCGACCACTGGCACCGCCAACGCACAATTCGAATCACCAATCAAAATGGAGGT  
GACGACGTCGTCGGAAGACAGAGAAACGCTCTGCTTGGACGATATTAAGTTCAGTCCT  
GGTGATCACAACCACAATGGCCGTGATAGGGATCTTCTGGACCGGCACCTCGATTCCCT  
ATCGATGTCGTCATCGAGTTCGGCGTGTTCTTGGGATAGTTCGCCTTCTGTTTCGTGCA  
CGGCGTTCATTCTCAAGAAAGAGCCCAGCGAGGACCTCGAAGAGGACGAGGAGCAC  
GAGGAAATCGAGGAGGAAGAGGACAGCGGATGCGAAAGCGAAGGTCAAATCCTGAC  
ACCACCATCGAGTCCGGGCTCGGGTCAAGGTCATTCCAACCTCCAGTCACTCGTCGAGC  
GGGAGTTCTATGCTCGATGTACAGAACCTCAACCTTCACGGGACGGGTGGCAGGAGCG  
CTATCGTCAGGGTTACCACTAGCAACGCACAGGGTGTGCGCAAGACTGATCTCCGTAC  
AGCGAATGGCTACCCCGCAGTTGCAGGCACGCAACATGCACATGCAGGCACAACCTGC  
GGCTGCGAGCACCGTGGCTAATAGGCACCATGCGAGGAGCCATGAGCACAGTCCACCT  
GATACGAAGCGCAGGATACACAAATGCCAATTTCCGGGTGCAAGAAGGTATATACCA  
AGAGCTCACATCTGAAAGCTCATCAGAGGACGCACACAG

>novel\_circ\_000123

ACATGCTACGAGATGGAGAGGTACCTGAAGGACGAACCGAAACTGCAATCGTACAAA  
AAGTTGCCACACAGAGTTAGATACAGCACCCCTGGAATCTCTTCAGGCCTCCTATTTTCGTG  
GACAGCGACCACTGGCACCGCCAACGCACAATTCGAATCACCAATCAAAATGGAGGT  
GACGACGTCGTCGGAAGACAGAGAAACGCTCTGCTTGGACGATATTAAGTTCAGTCCT  
GGTGATCACAACCACAATGGCCGTGATAGGGATCTTCTGGACCGGCACCTCGATTCCCT  
ATCGATGTCGTCATCGAGTTCGGCGTGTTCTTGGGATAGTTCGCCTTCTGTTTCGTGCA  
CGGCGTTCATTCTCAAGAAAGAGCCCAGCGAGGACCTCGAAGAGGACGAGGAGCAC  
GAGGAAATCGAGGAGGAAGAGGACAGCGGATGCGAAAGCGAAGGTCAAATCCTGAC  
ACCACCATCGAGTCCGGGCTCGGGTCAAGGTCATTCCAACCTCCAGTCACTCGTCGAGC  
GGGAGTTCTATGCTCGATGTACAGAACCTCAACCTTCACGGGACGGGTGGCAGGAGCG  
CTATCGTCAGGGTTACCACTAGCAACGCACAGGGTGTGCGCAAG

>novel\_circ\_000125

AACATTAGGCCAAGGGAAATAAAAACCGGTTTTATATGATTTTTCCTGAAAAGTTCTAT  
CAAAGCACCCCTCTGTAGCGATACGTTCACTTTCGATATGCATTTTTGAATGGAATCTAA  
TTCTCGCTAATATCGGCAGTCTTGCCCCGCAACCATTGCAACGATTTTCGTGCCTCTTT  
TATTTCCCTTTTCGAAAT

>novel\_circ\_000126

GAACGAACTGTTCTACCAAAATACTATACGAGAGTGCCTTCGGTCGCAAGATCGTCGA  
CGAACAGTTCAGGCATCAATCTAGATTGTTTCATCGAATACGACACTCGCAACAATCGCG  
AGTCCGTTCAACAGTCAAACAGCCCTAATCGCGGAGAAAAAAGTGATTTCCTTCTGGCA  
ATATTGTCATTGCTAACCATTACTATGCACAGAACTTGAGGAACAATCATCAGAAGACT  
CTAAACGGGTCTCACATATACGACCCTCTTGACAAGGGTTCTGATCACGATTACAAGCA  
AATCGATCCATTATTGGTCGGCGAACCTCCGTACATGGGGGTCGAAAACACCAAGCAA  
ACCATGAGCTCGCAAAATATAAAACCGGCCAAGGACTCGGACGATGTTTTGCATACAC  
AGTTCAAAGAAGTGAAACGATCACCTATGCGCTATACTATGCAG

>novel\_circ\_000127

AGGCCCTGGCTAGTATGGGATATACAAGAAGTGAAATAGAAGATTCCCTTAGGACAAGC  
AAAGTACGATGACGTGTTTCGCCACGTACTTACTCTTAGGAAGAAAGACAACCTGATCCT  
GAATCAGATGGCTCGCGATCAGGCAGTTCGTTGTCATTGCGCAACATTCCACCGCAAG  
CTGGTTCAGGTGGTGGTGGAAGTGGTGGTGGAGGAGGAAGTGGAGGAGGCACTGGT  
GGTGCTGTGCAGAGTCCGTTCGCATAGAGGTGTTTCATAGAAGTATCTCTGCTAGCAATCC  
AAAACCGAGTAGACGAGTTTCATCCGGTCTCGAAACGCTTCGAGCAGCGCCGAGCCC  
AGGAAATGCAACGAACCATAATCACGCAACTCCTACGACTGGTGGAACCTGTAACCTGGA  
AACACTGGTAGTAATTTTAAGAGACAAAATACCGTGGATGCGGCCACGATCAAAGAGA  
ATACTGCTCGCGTTTCTGCGAGCCGACCCTCGGCTCCTAAAAACAGTCCTGGCCAATTA  
GATACTATGACAATGTTTCATTCTAGGCGTGGGTACAAGTCCCGGTGGTAGAGCATGGGC  
AGGAAAGAGCAACACAATGAATGCAGGGGTAGGTAGTGGTCGGCCTCTTACTTCACCT  
GCCCCTGGTTCTGTTGGTCGACGTAGTACCATCTCTTATGATCAAGCGAAAACGTCCTC  
TTCATCTACCGAAAGAACCAACGATACACCCAG

>novel\_circ\_000128

ACAGGGGATGGCGTGGGAGTGTCGAGTAGCGGTGGTCGACTCTCTTCTCGAAGTCGA  
ACCTCGGAGGAACCCACATCGGCAAGTACAAATTACTTAAAACAATTGGCAAAGGTA  
ATTTTGCCAAGGTAAACTTGCCAAACATGTACCTACCGGAAAAGAAGTGGCTATCAA  
AATTATTGACAAGACTCAACTAAATCCCGGTAGCCTTCAAAAATTATTCCGAGAAGTAA  
GAATAATGAAGATGCTCGATCATCCGAATATAGTGAAGCTTTTCCAAGTGATCGAGACT  
GAGAAAACATTGTACCTGGTAATGGAATACGCCAGTGGTGGCGAAGTTTTTGACTACT  
TGGTCCTGCATGGTCGGATGAAAGAAAAGGAGGCTAGAGCAAAGTTCCGGCAAATTG  
TCTCTGCTGTGCAATACTGCCATCAAAAAAAGATCATCCATAGGGATTAAAGGCTGAA  
AATTTACTACTCGATAGCGAGATGAACATCAAAATCGCCGATTTTGGTTTCAGCAATGA  
ATTCACACCAGGCAACAAGTTGGATACTTTCTGCGGATCACCTCCTTATGCAGCACCTG  
AACTTTTTCAAGGTAAAAAGTACGATGGACCCGAAGTAGATGTGTGGTCGTTGGGAGT  
AATATTATACACTTTAGTGTCTGGATCACTGCCCTTCGACGGTTCGACACTGAGAGAAT  
TGAGGGAACGAGTATTACGAGGAAAATATCGAATTCCATTTTACATGTCCACGGATTGT  
GAGAATCTTTTGAAAAAGTTTTTGGTGCTTAACCCGACGAAACGGGCATCCTTAGAGA  
CTATTATGAAGGACAAATGGATGAACATGGGATACGATGACGACGAATTGAAACCGTA  
CTTAGAACCTGAACCTGATTATAAAGACCACAAGAGGATAGGTGAGTCTGCCAAGGCC  
CTGGCTAGTATGGGATATACAAGAAGTGAAATAGAAGATTCCCTTAGGACAAGCAAAGT  
ACGATGACGTGTTTCGCCACGTACTTACTCTTAGGAAGAAAGACAACCTGATCCTGAATC  
AGATGGCTCGCGATCAGGCAGTTCGTTGTCATTGCGCAACATTCCACCGCAAGCTGGT

TCAGGTGGTGGTGGAAAGTGGTGGTGGAGGAGGAAGTGGAGGAGGCACTGGTGGTGC  
TGTGCAGAGTCCGTCGCATAGAGGTGTTTCATAGAAGTATCTCTGCTAGCAATCCAAAAC  
CGAGTAGACGAGTTTTCATCCGGTCTCGAAACGCTTCGAGCAGCGCCGAGCCCAGGAA  
ATGCAACGAACCATAATCACGCAACTCCTACGACTGGTGGAACTGTAAGTGGAAACAC  
TGGTAGTAATTTTAAGAGACAAAATACCGTGGATGCGGCCACGATCAAAGAGAATACT  
GCTCGCGTTTCTGCGAGCCGACCCTCGGCTCCTAAAAACAGTCCTGGCCAATTAGATA  
CTATGACAATGTTTCATTCTAGGCGTGGGTACAAGTCCCGGTGGTAGAGCATGGGCAGG  
AAAGAGCAACACAATGAATGCAGGGGTAGGTAGTGGTTCGGCCTCTTACTTCACCTGCC  
CCTGGTTCTGTTGGTCGACGTAGTACCATCTCTTATGATCAAGCGAAAACGTCTCTTC  
ATCTACCGAAAGAACCAACGATACACCCAG

>novel\_circ\_000129

AGAAATCGAGCTGCCGCCATCCGCCGTAGACGCCTGATCCATCGACGAGGGGGTCC  
GACTATTGAAGAGTTGGCAATATTGATCGAGGTTTGAACGGAATTATGCGGAGAACGAT  
CGAAATCTGACCGTTTCTTCCCTCTTCCGCGAATACAAAATCGATACGTAAGAACTC  
GACGACGCGCGCGATAATTATTTGGAAATATAATCGAAAATCTTGTGTAATGGAGAATC  
AAGAGAGATCGTTGTTTCAGTCGGATGCAACCGAGCAGGGATTTCGATCCGATTGCAAAT  
CGGGCGGAAAGGGTTCGAGGCGGGGGGGAAGGAGAGCGGGAAACAAATCGGTGAAC  
GCCACTCCGTGAAAGAGCAAATCGGTCCATCCGCTTCTCCCGGAAAGTATGCGGCTAC  
GCCTCGTCCTGTCGTGGACAATCTGAAGCAATGGGAGTTGGTAGAGTGCGGTCAGAGT  
TTGCGAGTGGTGGAAAAGAGGATCGGCGTGAAATCTTGTCTCCCTCGGGAGGAGTCG  
TCGGACGTTGAACGTGCGCCGAGCCTCGTTGGGAGGAAAACCTCCCCCTTCGGAGAGC  
AGCGTGGCCATCGACGCGAATCTCGAGGAGAAGTTGAAAGCTTTCAAAGACTCGAAG  
ATCGTTCAACCTATTGTCTCGTCTCAACGCGAACGCACCGACGACGGGAAAGTCCCGA  
TCAATCTCGAACTGATCCTGAAACAGCCTAGGAAAGGCTCGGCTATCGAGAGCACGGA  
TATGCTTCAACGGTTAGAACAGCAGGTCAAGGCCATCGAAATGGACACTCTTGACAGCT  
AGAACGCGCCAGTTGGAGTTTAGCTCGGATTTTCGAGCCGGAAATTTCGATACGCGGACC  
TTCACCGATACAGGGAACACGAGGATCTACTTCGAAACGTGACGGATAACGAGGCCGA  
GGGGTCTCCGTTACACCGAGGAGATGCGACGAGGAATTCGACGGGAAATGCAGGGAT  
CGTTACGAAGAAAGGTTTCGACGAAATTGTCAAGGACGGCCTCGGACTCGAGGCGGGG  
ACAGGAAGCGGAAGTACTCCTTCGAGCGCAAGCTAGGGTGACACAAGCGCGTGTATT  
GATACAGGCTAACAACGCAACAAAGAAACATCAACGTCAACAGCAACAGCGACAGAG  
CAGTGCGGTTCAGACCGTTGTCAACCGTAACGCAGAAGGGTGCGCATAATGAGAAGGA  
GACAGGGGATGGCGTGGGAGTGTGAGTAGCGGTGGTCGACTCTCTTCTCGAAGTCG  
AACCTCGGAGGAACCCACATCGGCAAGTACAAATTACTTAAAACAATTGGCAAAGGT  
AATTTTGCCAAGGTAAACTTGCCAAACATGTACCTACCGGAAAAGAAGTGGCTATCA  
AAATTATTGACAAGACTCAACTAAATCCCGGTAGCCTTCAAAAATTATTCCGAGAAGTA  
AGAATAATGAAGATGCTCGATCATCCGAATATAGTGAAGCTTTTCCAAGTGATCGAGAC  
TGAGAAAACATTGTACCTGGTAATGGAATACGCCAGTGGTGGCGAAGTTTTTGACTAC  
TTGGTCCTGCATGGTTCGGATGAAAGAAAAGGAGGCTAGAGCAAAGTTCGGGCAAATT  
GTCTCTGCTGTGCAATACTGCCATCAAAAAAAGATCATCCATAGGGATTTAAAGGCTGA  
AAATTTACTACTCGATAGCGAGATGAACATCAAAATCGCCGATTTTGGTTTCAGCAATG  
AATTCACACCAGGCAACAAGTTGGATACTTTCTGCGGATCACCTCCTTATGCAGCACCT  
GAACTTTTTCAAGGTAAAAAGTACGATGGACCCGAAGTAGATGTGTGGTCGTTGGGAG

TAATATTATACACTTTAGTGTCTGGATCACTGCCCTTCGACGGTTCGACACTGAGAGAAT  
TGAGGGAACGAGTATTACGAGGAAAATATCGAATTCCATTTTACATGTCCACGGATTGT  
GAGAATCTTTTGAAAAAGTTTTTGGTGCTTAACCCGACGAAACGGGCATCCTTAGAGA  
CTATTATGAAGGACAAATGGATGAACATGGGATACGATGACGACGAATTGAAACCGTA  
CTTAGAACCTGAACCTGATTATAAAGACCACAAGAGGATAGGTGAGTCTGCCAAGGCC  
CTGGCTAGTATGGGATATACAAGAAGTGAAATAGAAGATTCCTTAGGACAAGCAAAGT  
ACGATGACGTGTTTCGCCACGTACTTACTCTTAGGAAGAAAGACAACCTGATCCTGAATC  
AGATGGCTCGCGATCAGGCAGTTCGTTGTTCATTGCGCAACATTCCACCGCAAGCTGGT  
TCAGGTGGTGGTGGAAAGTGGTGGTGGAGGAGGAAGTGGAGGAGGCACTGGTGGTGC  
TGTGCAGAGTCCGTCGCATAGAGGTGTTTCATAGAAGTATCTCTGCTAGCAATCCAAAAC  
CGAGTAGACGAGTTTCATCCGGTCTCGAAACGCTTCGAGCAGCGCCGAGCCCAGGAA  
ATGCAACGAACCATAATCACGCAACTCCTACGACTGGTGGAACCTGTAACCTGGAAACAC  
TGGTAGTAATTTTAAGAGACAAAATACCGTGGATGCGGCCACGATCAAAGAGAATACT  
GCTCGCGTTTCTGCGAGCCGACCCTCGGCTCCTAAAAACAGTCCTGGCCAATTAGATA  
CTATGACAATGTTTCATTCTAGGCGTGGGTACAAGTCCCGGTGGTAGAGCATGGGCAGG  
AAAGAGCAACACAATGAATGCAGGGGTAGGTAGTGGTTCGGCCTCTTACTTCACCTGCC  
CCTGGTTCTGTTGGTCGACGTAGTACCATCTCTTATGATCAAGCGAAAACGTCTCTTC  
ATCTACCGAAAGAACCAACGATACACCCAG

>novel\_circ\_000130

GCCCTGGCTAGTATGGGATATACAAGAAGTGAAATAGAAGATTCCTTAGGACAAGCAA  
AGTACGATGACGTGTTTCGCCACGTACTTACTCTTAGGAAGAAAGACAACCTGATCCTGA  
ATCAGATGGCTCGCGATCAGGCAGTTCGTTGTTCATTGCGCAACATTCCACCGCAAGCT  
GGTTCAGGTGGTGGTGGAAAGTGGTGGTGGAGGAGGAAGTGGAGGAGGCACTGGTGG  
TGCTGTGCAGAGTCCGTCGCATAGAGGTGTTTCATAGAAGTATCTCTGCTAGCAATCCAA  
AACCGAGTAGACGAGTTTCATCCGGTCTCGAAACGCTTCGAGCAGCGCCGAGCCCAG  
GAAATGCAACGAACCATAATCACGCAACTCCTACGACTGGTGGAACCTGTAACCTGGAAA  
CACTGGTAGTAATTTTAAGAGACAAAATACCGTGGATGCGGCCACGATCAAAGAGAAT  
ACTGCTCGCGTTTCTGCGAGCCGACCCTCGGCTCCTAAAAACAGTCCTGGCCAATTAG  
ATACTA

>novel\_circ\_000131

AGGCCCTGGCTAGTATGGGATATACAAGAAGTGAAATAGAAGATTCCTTAGGACAAGC  
AAAGTACGATGACGTGTTTCGCCACGTACTTACTCTTAGGAAGAAAGACAACCTGATCCT  
GAATCAGATGGCTCGCGATCAGGCAGTTCGTTGTTCATTGCGCAACATTCCACCGCAAG  
CTGGTTCAGGTGGTGGTGGAAAGTGGTGGTGGAGGAGGAAGTGGAGGAGGCACTGGT  
GGTGTGCTGTGCAGAGTCCGTCGCATAGAGGTGTTTCATAGAAGTATCTCTGCTAGCAATCC  
AAAACCGAGTAGACGAGTTTCATCCGGTCTCGAAACGCTTCGAGCAGCGCCGAGCCC  
AGGAAATGCAACGAACCATAATCACGCAACTCCTACGACTGGTGGAACCTGTAACCTGGA  
AACACTGGTAGTAATTTTAAGAGACAAAATACCGTGGATGCGGCCACGATCAAAGAGA  
ATACTGCTCGCGTTTCTGCGAGCCGACCCTCGGCTCCTAAAAACAGTCCTGGCCAATTA  
GATACTA

>novel\_circ\_000132



AGAAATCGAGCTGCCGCCCATCCGCCCCTAGACGCCTGATCCATCGACGAGGGGGTCC  
GACTATTGAAGAGTTGGCAATATTGATCGAGGTTTGAACGGAATTATGCGGAGAACGAT  
CGAAATCTGACCGTTTCCCTTCCCTCTTCCGCGAATACAAAATCGATACGTAAGAACTC  
GACGACGCGCGCGATAATTATTTGGAAATATAATCGAAAATCTTGTGTAATGGAGAATC  
AAGAGAGATCGTTGTTTCAGTCGGATGCAACCGAGCAGGGATTTCGATCCGATTGCAAAT  
CGGGCGGAAAGGGTTTCGAGGCGGGGGGGAAGGAGAGCGGGAAACAAATCGGTGAAC  
GCCACTCCGTGAAAGAGCAAATCGGTCCATCCGCTTCTCCCGGAAAGTATGCGGCTAC  
GCCTCGTCCTGTCGTGGACAATCTGAAGCAATGGGAGTTGGTAGAGTGCGGTCAGAGT  
TTGCGAGTGGTGGAAAAGAGGATCGGCGTGAAATCTTGTCTCCCTCGGGAGGAGTCG  
TCGGACGTTGAACGTGCGCCGAGCCTCGTTGGGAGGAAAACCTCCCCCTTCGGAGAGC  
AGCGTGGCCATCGACGCGAATCTCGAGGAGAAGTTGAAAGCTTTCAAAGACTCGAAG  
ATCGTTCAACCTATTGTCTCGTCTCAACGCGAACGCACCGACGACGGGAAAGTCCCGA  
TCAATCTCGAACTGATCCTGAAACAGCCTAGGAAAGGCTCGGCTATCGAGAGCACGGA  
TATGCTTCAACGGTTAGAACAGCAGGTCAAGGCCATCGAAATGGACACTCTTGCAGCT  
AGAACGCGCCAGTTGGAGTTTAGCTCGGATTTTCGAGCCGGAAATTCGATACGCGGACC  
TTCACCGATACAGGGAACACGAGGATCTACTTCGAAACGTGACGGATAACGAGGCCGA  
GGGGTCTCCGTTACACCGAGGAGATGCGACGAGGAATTCGACGGGAAATGCAGGGAT  
CGTTACGAAGAAAGGTTTCGACGAAATTGTCAAGGACGGCCTCGGACTCGAGGCGGGG  
ACAGGAAGCGGAAGTACTCCTTCGAGCGCAAGCTAGGGTGACACAAGCGCGTGTATT  
GATACAGGCTAACAACGCAACAAAGAAACATCAACGTCAACAGCAACAGCGACAGAG  
CAGTGCGGTCAGACCGTTGTCAACCGTAACGCAGAAGGGTGCGCATAATGAGAAGGA  
GACAGGGGATGGCGTGGGAGTGTCGAGTAGCGGTGGTCGACTCTCTTCTCGAAGTCG  
AACCTCGGAGGAACCCACATCGGCAAGTACAAATTACTTAAAACAATTGGCAAAGGT  
AATTTTGCCAAGGTAAAACTTGCCAAACATGTACCTACCGGAAAAGAAGTGGCTATCA  
AAATTATTGACAAGACTCAACTAAATCCCGGTAGCCTTCAAAAATTATTCCGAGAAGTA  
AGAATAATGAAGATGCTCGATCATCCGAATATAGTGAAGCTTTTCCAAGTGATCGAGAC  
TGAGAAAACATTGTACCTGGTAATGGAATACGCCAGTGGTGGCGAAGTTTTTGACTAC  
TTGGTCTGTCATGGTCGGATGAAAGAAAAGGAGGCTAGAGCAAAGTTCCGGCAAATT  
GTCTCTGCTGTGCAATACTGCCATCAAAAAAAGATCATCCATAGGGATTAAAGGCTGA  
AAATTTACTACTCGATAGCGAGATGAACATCAAAATCGCCGATTTTGGTTTCAGCAATG  
AATTCACACCAGGCAACAAGTTGGATACTTTCTGCGGATCACCTCCTTATGCAGCACCT  
GAACTTTTTCAAGGTAAAAAGTACGATGGACCCGAAGTAGATGTGTGGTCGTTGGGAG  
TAATATTATACACTTTAGTGTCTGGATCACTGCCCTTCGACGGTTCGACACTGAGAGAAT  
TGAGGGAACGAGTATTACGAGGAAAATATCGAATTCCATTTTACATGTCCACGGATTGT  
GAGAATCTTTTGAAAAAGTTTTTGGTGCTTAACCCGACGAAACGGGCATCCTTAGAGA  
CTATTATGAAGGACAAATGGATGAACATGGGATACGATGACGACGAATTGAAACCGTA  
CTTAGAACCTGAACCTGATTATAAAGACCACAAGAGGATAGGTGAGTCTGCCAAGGCC  
CTGGCTAGTATGGGATATACAAGAAGTGAAATAGAAGATTCTTAGGACAAGCAAAGT  
ACGATGACGTGTTGCGCCACGTACTTACTCTTAGGAAGAAAGACAACCTGATCCTGAATC  
AGATGGCTCGCGATCAGGCAGTTCGTTGTCATTGCGCAACATTCCACCGCAAGCTGGT  
TCAGGTGGTGGTGGAAGTGGTGGTGGAGGAGGAAGTGGAGGAGGCACTGGTGGTG  
TGTGCAGAGTCCGTCGCATAGAGGTGTTATAGAAGTATCTCTGCTAGCAATCCAAAAC  
CGAGTAGACGAGTTTCATCCGGTCTCGAAACGCTTCGAGCAGCGCCGAGCCAGGAA  
ATGCAACGAACCATAATCACGCAACTCTACGACTGGTGGAAGTGAAGTGAAGAACAC

TGGTAGTAATTTTAAGAGACAAAATACCGTGGATGCGGCCACGATCAAAGAGAATACT  
GCTCGCGTTTCTGCGAGCCGACCCTCGGCTCCTAAAAACAGTCCTGGCCAATTAGATA  
CTA

>novel\_circ\_000133

GCCCTGGCTAGTATGGGATATACAAGAAGTGAAATAGAAGATTCCTTAGGACAAGCAA  
AGTACGATGACGTGTTTCGCCACGTACTTACTCTTAGGAAGAAAGACAACCTGATCCTGA  
ATCAGATGGCTCGCGATCAGGCAGTTCGTTGTCATTGCGCAACATTCCACCGCAAGCT  
GGTTCAGGTGGTGGTGGAAAGTGGTGGTGGAGGAGGAAGTGGAGGAGGCACTGGTGG  
TGCTGTGCAGAGTCCGTCGCATAGAGGTGTTTCATAGAAGTATCTCTGCTAGCAATCCAA  
AACCGAGTAGACGAGTTTCATCCGGTCTCGAAACGCTTC

>novel\_circ\_000134

AGGCCCTGGCTAGTATGGGATATACAAGAAGTGAAATAGAAGATTCCTTAGGACAAGC  
AAAGTACGATGACGTGTTTCGCCACGTACTTACTCTTAGGAAGAAAGACAACCTGATCCT  
GAATCAGATGGCTCGCGATCAGGCAGTTCGTTGTCATTGCGCAACATTCCACCGCAAG  
CTGGTTCAGGTGGTGGTGGAAAGTGGTGGTGGAGGAGGAAGTGGAGGAGGCACTGGT  
GGTGTGTGCAGAGTCCGTCGCATAGAGGTGTTTCATAGAAGTATCTCTGCTAGCAATCC  
AAAACCGAGTAGACGAGTTTCATCCGGTCTCGAAACGCTTC

>novel\_circ\_000135

AGAAATCGAGCTGCCGCCCATCCGCCCGTAGACGCCTGATCCATCGACGAGGGGGTCC  
GACTATTGAAGAGTTGGCAATATTGATCGAGGTTTGAACGGAATTATGCGGAGAACGAT  
CGAAATCTGACCGTTTCCCTTCCCTCTTCCGCGAATACAAAATCGATACGTAAGAACTC  
GACGACGCGCGCGATAATTATTTGGAAATATAATCGAAAATCTTGTGTAATGGAGAATC  
AAGAGAGATCGTTGTTTCAGTCGGATGCAACCGAGCAGGGATTTCGATCCGATTGCAAAT  
CGGGCGGAAAGGGTTTCGAGGCGGGGGGGAAGGAGAGCGGGAAACAAATCGGTGAAC  
GCCACTCCGTGAAAGAGCAAATCGGTCCATCCGCTTCTCCCGGAAAGTATGCGGCTAC  
GCCTCGTCCTGTCTGTTGACAATCTGAAGCAATGGGAGTTGGTAGAGTGCGGTCAGAGT  
TTGCGAGTGGTGGAAAAGAGGATCGGCGTGAAATCTTGTCTCCCTCGGGAGGAGTCG  
TCGGACGTTGAACGTGCGCCGAGCCTCGTTGGGAGGAAAACCTCCCCCTTCGGAGAGC  
AGCGTGGCCATCGACGCGAATCTCGAGGAGAAGTTGAAAGCTTTCAAAGACTCGAAG  
ATCGTTCAACCTATTGTCTCGTCTCAACGCGAACGCACCGACGACGGGAAAGTCCCGA  
TCAATCTCGAACTGATCCTGAAACAGCCTAGGAAAGGCTCGGCTATCGAGAGCACGGA  
TATGCTTCAACGGTTAGAACAGCAGGTCAAGGCCATCGAAATGGACACTCTTGCAGCT  
AGAACGCGCCAGTTGGAGTTTAGCTCGGATTTTCGAGCCGAAATTTCGATACGCGGACC  
TTCACCGATACAGGGAACACGAGGATCTACTTCGAAACGTGACGGATAACGAGGCCGA  
GGGGTCTCCGTTACACCGAGGAGATGCGACGAGGAATTCGACGGGAAATGCAGGGAT  
CGTTACGAAGAAAGGTTTCGACGAAATTGTCAAGGACGGCCTCGGACTCGAGGCGGGG  
ACAGGAAGCGGAAGTACTCCTTCGAGCGCAAGCTAGGGTGACACAAGCGCGTGTATT  
GATACAGGCTAACACGCAACAAAGAAACATCAACGTCAACAGCAACAGCGACAGAG  
CAGTGCGGTCAGACCGTTGTCAACCGTAACGCAGAAGGGTGCGCATAATGAGAAGGA  
GACAGGGGATGGCGTGGGAGTGTTCGAGTAGCGGTGGTCGACTCTCTTCTCGAAGTCG  
AACCTCGGAGGAACCCACATCGGCAAGTACAAATTACTTAAAACAATTGGCAAAGGT

AATTTTGCCAAGGTAAAACTTGCCAAACATGTACCTACCGGAAAAGAAGTGGCTATCA  
AAATTATTGACAAGACTCAACTAAATCCCGGTAGCCTTCAAAAATTATTCCGAGAAGTA  
AGAATAATGAAGATGCTCGATCATCCGAATATAGTGAAGCTTTTCCAAGTGATCGAGAC  
TGAGAAAACATTGTACCTGGTAATGGAATACGCCAGTGGTGGCGAAGTTTTTGACTAC  
TTGGTCCTGCATGGTCGGATGAAAGAAAAGGAGGCTAGAGCAAAGTTCCGGCAAATT  
GTCTCTGTGTGCAATACTGCCATCAAAAAAAGATCATCCATAGGGATTTAAAGGCTGA  
AAATTTACTACTCGATAGCGAGATGAACATCAAAATCGCCGATTTTGGTTTCAGCAATG  
AATTCACACCAGGCAACAAGTTGGTACTTTCTGCGGATCACCTCCTTATGCAGCACCT  
GAACTTTTTCAAGGTAAAAAGTACGATGGACCCGAAGTAGATGTGTGGTCGTTGGGAG  
TAATATTATACACTTTAGTGTCTGGATCACTGCCCTTCGACGGTTCGACACTGAGAGAAT  
TGAGGGAACGAGTATTACGAGGAAAATATCGAATTCCATTTTACATGTCCACGGATTGT  
GAGAATCTTTTGAAAAAGTTTTTGGTGCTTAACCCGACGAAACGGGCATCCTTAGAGA  
CTATTATGAAGGACAAATGGATGAACATGGGATACGATGACGACGAATTGAAACCGTA  
CTTAGAACCTGAACCTGATTATAAAGACCACAAGAGGATAGGTGAGTCTGCCA

>novel\_circ\_000136

AGAAATCGAGCTGCCGCCCATCCGCCCGTAGACGCCTGATCCATCGACGAGGGGGTCC  
GACTATTGAAGAGTTGGCAATATTGATCGAGGTTTGAACGGAATTATGCGGAGAACGAT  
CGAAATCTGACCGTTTCCTTCCCTCTTCCGCGAATACAAAATCGATACGTAAGAACTC  
GACGACGCGCGCGATAATTATTTGGAAATATAATCGAAAATCTTGTGTAATGGAGAATC  
AAGAGAGATCGTTGTTCAAGTCGGATGCAACCGAGCAGGGATTTCGATCCGATTGCAAAT  
CGGGCGGAAAGGGTTCGAGGCGGGGGGGAAGGAGAGCGGGAAACAAATCGGTGAAC  
GCCACTCCGTGAAAGAGCAAATCGGTCCATCCGCTTCTCCCGGAAAGTATGCGGCTAC  
GCCTCGTCCTGTCGTGGACAATCTGAAGCAATGGGAGTTGGTAGAGTGCGGTCAGAGT  
TTGCGAGTGGTGGAAAAGAGGATCGGCGTGAAATCTTGTCTCCCTCGGGAGGAGTCG  
TCGGACGTTGAACGTGCGCCGAGCCTCGTTGGGAGGAAAACCTCCCCCTTCGGAGAGC  
AGCGTGGCCATCGACGCGAATCTCGAGGAGAAGTTGAAAGCTTTCAAAGACTCGAAG  
ATCGTTCAACCTATTGTCTCGTCTCAACGCGAACGCACCGACGACGGGAAAGTCCCGA  
TCAATCTCGAACTGATCCTGAAACAGCCTAGGAAAGGCTCGGCTATCGAGAGCACGGA  
TATGCTTCAACGGTTAGAACAGCAGGTCAAGGCCATCGAAATGGACACTCTTGCAGCT  
AGAACGCGCCAGTTGGAGTTTAGCTCGGATTTTCGAGCCGAAATTCGATACGCGGACC  
TTCACCGATACAGGGAACACGAGGATCTACTTCGAAACGTGACGGATAACGAGGCCGA  
GGGGTCTCCGTTACACCGAGGAGATGCGACGAGGAATTTCGACGGGAAATGCAGGGAT  
CGTTACGAAGAAAGGTTTCGACGAAATTGTCAAGGACGGCCTCGGACTCGAGGCGGGG  
ACAGGAAGCGGAAGTACTCCTTCGAGCGCAAGCTAGGGTGACACAAGCGCGTGTATT  
GATACAGGCTAACAACGCAACAAAGAAACATCAACGTCAACAGCAACAGCGACAGAG  
CAGTGCGGTCAGACCGTTGTCAACCGTAACGCAGAAGGGTGCGCATAATGAGAAGGA  
GACAGGGGATGGCGTGGGAGTGTGAGTAGCGGTGGTTCGACTCTCTTCTCGAAGTCG  
AACCTCGGAGGAACCCACATCGGCAAGTACAAATTACTTAAAACAATTGGCAAAGGT  
AATTTTGCCAAGGTAAAACTTGCCAAACATGTACCTACCGGAAAAGAAGTGGCTATCA  
AAATTATTGACAAGACTCAACTAAATCCCGGTAGCCTTCAAAAATTATTCCGAGAAGTA  
AGAATAATGAAGATGCTCGATCATCCGAATATAGTGAAGCTTTTCCAAGTGATCGAGAC  
TGAGAAAACATTGTACCTGGTAATGGAATACGCCAGTGGTGGCGAAGTTTTTGACTAC  
TTGGTCCTGCATGGTCGGATGAAAGAAAAGGAGGCTAGAGCAAAGTTCCGGCAAATT

GTCTCTGCTGTGCAATACTGCCATCAAAAAAAGATCATCCATAGGGATTTAAAGGCTGA  
AAATTTACTACTCGATAGCGAGATGAACATCAAAATCGCCGATTTTGGTTTCAGCAATG  
AATTCACACCAGGCAACAAGTTGGATACTTTCTGCGGATCACCTCCTTATGCAGCACCT  
GAACTTTTTCAAGGTAAAAAGTACGATGGACCCGAAGTAGATGTGTGGTCGTTGGGAG  
TAATATTATACACTTTAGTGTCTGGATCACTGCCCTTCGACGGTTCGACACTGAGAGAAT  
TGAGGGAACGAGTATTACGAGGAAAATATCGAATTCCATTTTACATGTCCACGGATTGT  
GAGAATCTTTTGAAAAAGTTTTTGGTGCTTAACCCGACGAAACGGGCATCCTTAGAGA  
CTATTATGAAGGACAAATGGATGAACATGGGATACGATGACGACGAATTGAAACCGTA  
CTTAGAACCTGAACCTGATTATAAAGACCACAAGAGGATAG

>novel\_circ\_000137

GCAATAACAACGGTGGATATTAAAGAGGCAGAGGGAGGGAGAAGAAGGTGAAGGAG  
GAGGAGGTAATAACCTCCTGGCGAGAGAAAGTAGAGAAAGGGCAGAGATCGGGGAAT  
CGCGAGAAATACGTGCTACGAAGGAAGGAAGAATTATCGACTGTCAAGTTTTTTAATC  
AACGTCCCCGCGACCGAAGAAGACACGCAGCTTGCAAATTAACCGCAAAGTTCCAGT  
TCGATAGGCCCGCCTGGGATATTCGTTTCGACGAATTCGTTTTGGAAAACTTTAATCA  
TTTAATTAAACGAGCAAATTCGAGATAACCTCCGGAGCTTCCCACGAGTTAACCGGAG  
TTTCAACCGGCGAAACGATAGATTTCGGGAGAAGTTTGAGGGAAGCGGTGGATTGGAA  
AAGCGATTATCGAGCGACCGGCCTATTAATTACCGGAATTTTCAACGGGAGAAGAATCT  
ATCTAAGGGGTCAGTCGAAAGGAAACACGTTTATGGATGAACGTCCCGGCGAGACGAT  
TCGACGACAGCGTTAGAAGATGTTAAGGAAAAATTGTCTCGCATTGTTCTCAGGGGAG  
AAGAAAAACATCGAGGGGAATCCTCCTGTTTGAGGGATATCGCACGTGCGGTGTGAAG  
AGAGAACCTGTATATATATATAGATATATAAAAGTGTTGGTATATTTCAAAAAAATCGAG  
GAAGAGAGGGAAACACGTTGAAGCAAGTTATTAGCGAACGACGTCGTGTTTCTAGTGT  
GGAAAGAGTGTGGAAAGAGTGTGTTAATCAACAGCAGCATCGTCGGTGGGATATAATG  
GCGGTTTCGCTGAGCGAAGGAAACGTACGAGGGGAAGGTCACGACGTTTCGTTACGAC  
GAGACGGCCTGGTATGACGTGACGAGAGGAAACCGCTTTGGTGCACTTCCATCGCGA  
GTATTCCAGAAAAGAAATCTACCATGAGAGCGTCTCGAGTAGCTGCGCTGTTGATCCTC  
TGTTACGCCATCG

>novel\_circ\_000139

AATATGTGAAAGGCAAAGAGATGTTGATAGAAATGAAGATAGAGGAGAGGACGAGGA  
TGAGGATGCTAATCCATTGGGAAAAATGGCCACATGCCCTTAGTCCAGCTTTAGCATGTC  
TTAGTTGCACCCTTGGTCTTTTTAATATAAGTAGATTTTCTATTCTCAGTATACAATTTGG  
AGCAAATTTCAATTGTACAATTTTAAATTTTATCTTTGATATTGGGTATTCCACTTTTGACA  
TTACATGTATGTCTCGGTCAAAGATTGGCGGTGGATCTGTAAATATGTGGAAAATTC  
ACCTGTTTTTCAAGGTGTTGGAATAGCTCTTCTAATTGCACAAGCTTTTATTGGTATTTAT  
AGTGTTGTTGGCATATCTTGGATGTTTCGTATACTTTAGAGATTCGTTTCATAACGAAACAG  
GATAAGTATCGATGGGCAGAACCATTTTCTCTATACAGGGATGATAAATTTATACAAAAT  
AATAGTAATTTGCATAAATTATATGAAACAGTACCAGATTATTTTAGCGGAGTTGTCTTG  
CAAAGACATCATTTAAATGAATCAGATCCTGGTGTTATAACATTAAAGTTTCAATTAGCT  
TTCAATTTAGCCGTTGTATGGATGATTGTATTTGTATCATTAAGCAAAGGATTAAAATCTT  
ATGGAAGAGTAGTGTATGTTTTACTAGTACCTGTATTTGGTACTTTAGTTCTTTGTA  
CAAAATTACTTGGTCTTACGCCTCCAGGTTCTATACATCAACTATTTCCAGCCACTGTAT

GGACCGAATTTTTTATTAATGGTAAATCGTGGTTAGCTGCATCTATTGAAGTTTTCTTA  
CATGGGGATTATTTGGTGCAGCTGCTATGCAGATAGCTGCTCATAATAAACATAAACATT  
TATTACAACGAGATACAAGTCTTGTAATTGTATTAACAATTGCAGTTTTACTTCTCGCTG  
CTTTTCTAGCAAATACTTGTGTACAAGTCTCAGACATCACGGATATATTTATATACCTAG  
TTCATTTGAAAAAATATCATTATATATGTTTATGAGACCCGTCAGTCAACCTGCACCATC  
AGGATATAGTAGTACACCAGAAAGATTTATGGCACATACTTCTTTTATTGTTGGAGAACG  
CGTAACTCGTCCTGGTGCAGATTTTAGCATTGAATCTGGTTATCAAGTTTTAAGATTATC  
GACTGAATTGGTTCCCGCAACATTAGCATTATTAGGTACTGAGCAAGTATCGCCATTTTG  
GGCAATTCTCTTTATTTTCACTTCTTATTCTATTTGGAATAGCTCAACAGCTGGCAATATGG  
CATTGTGTGATAACTGGTATTATGGCAATCAATACAAAAATGATGAAGTTGTGGGAAAC  
TACTGTTACATTCTTCAGTTGTGCTTGTGCTTACATACTAGGTTTACCTATGGCTACAGA  
A

>novel\_circ\_000140

AATATGTGAAAGGCAAAGAGATGTTGATAGAAATGAAGATAGAGGAGAGGACGAGGA  
TGAGGATGCTAATCCATTGGGAAAATGGCCACATGCCCTTAGTCCAGCTTTAGCATGTC  
TTAGTTGCACCCTTGGTCTTTTTAATATAAGTAGATTTTCTATTCTCAGTATACAATTTGG  
AGCAAATTTCAATTGTACAATTTTAAATTTTATCTTTGATATTGGGTATTCCACTTTTGACA  
TTACATGTATGTCTCGGTCAAAGATTGGCGGCTGGATCTGTAAATATGTGGAAAATTTT  
ACCTGTTTTTCAAGGTGTTGGAATAGCTCTTCTAATTGCACAAGCTTTTATTGGTATTTAT  
AGTGTGTTGTTGGCATATCTTGGATGTTTCGTATACTTTAGAGATTCGTTTATAACGAAACAG  
GATAAGTATCGATGGGCAGAACCATTTTCTCTATACAGGGATGATAAATTTATACAAAAT  
AATAGTAATTTGCATAAATTATATGAAACAGTACCAGATTATTTTAGCGGAGTTGTCTTG  
CAAAGACATCATTTAAATGAATCAGATCCTGGTGTTATAACATTAAAGTTTCAATTAGCT  
TTCAATTTAGCCGTTGTATGGATGATTGTATTTGTATCATTAAAGCAAAGGATTAATAATCTT  
ATGGAAAAGTAGTGTATGTTTTTACACTAGTACCTGTATTTGGTACTTTAGTTCTTTGTA  
CAAAATTACTTGGTCTTACGCCTCCAGGTTCTATACATCAACTATTTCCAGCCACTGTAT  
GGACCGAATTTTTTATTAATGGTAAATCGTGGTTAGCTGCATCTATTGAAGTTTTCTTA  
CATGGGGATTATTTGGTGCAGCTGCTATGCAG

>novel\_circ\_000141

GGCCCACTTTGGAACCGCCATTGCCACGGCGAAAGAAATGTCCGGAGCTTGCGTACAA  
AACGCACGAATTCATCACGGCAGCCGATGGGGGTGGTATCGATGCCGTCGATTCCAAC  
GTTGTAGCTGACAAAGTTCGAGAAGTTACAACGCAGTCGGGTTTACCACCGAGTCAAT  
TGAGCAAAGCAATCTCACGGATCAGCACCGAGTATCGGTTGCAGTTTGCCTGGCCTAG  
AAGACCCCAACTGACGAATGGCGAGACAGTGGCACCAGGAGTGACGGCCGCCGGAC  
TCCCTGCAGGTACGACAGGACCACCTAGAAAGTCTCTCAGCATGGGAGCTCTTAAGCA  
GGGTATCGCTCCTACAGGGCCCGCCCCGGTACACAAGAAACGTCCCGGTGATGTCGAT  
CACAAGCGTGATGGGATGCAAGCATCGGAGCTAGAACCCTTTGGTCGGAGGAACTGGA  
ACGGACACTATCGACGGAGTGGTGGCCGAGGGCGATGAGCGCGAGGAAGACATGTCG  
GACTTGAAAATAACTTTTCAAGGGGTAAAAAATCAGGTAGGACCGTAAGGATATCGGATG  
ATAAAGGGCTGAGGGAGAAACCGCAGGAGAAACCGTTTCCCACTGCTGAAGTCATCG  
AGCTTAGACGACTCGCTGACGAGTACAAG

>novel\_circ\_000142

GTTCGCGTGACGGTTCTAGACAAGAATGACGTGGCACCGACCTGGGGAACCGGCACC  
TGGAAATTCAAAATCTCCGAGGAGGCGCCACCCAACACCGTTGTACGGTCCTGAAA  
GCGTTTCGATCCGGATACCATCGGGACCTTGACTTACACCCTGGTACCGCATCATTGCCC  
AGGCCCCGCCGATCCGATGCCCAGCCAAGACGCGGCCCAAGGCGAAGCCCAATGCCA  
GTTCAAGGCTTACCCGACCACGGGACAACTGACACTCGCGGAGGGCCCTTGACAGAGA  
GACCAGAGAGAAATATGTCCTGAAAGTTCGAGCCGATGATGGATTGCAACACACGGAC  
ATCGCGTTAACCATTGAG

>novel\_circ\_000143

ATCTTTCACAGAAGAATATGAGTTTTCAAACGCTACTTCGGAGATTTTCGATATACCTCA  
AGAGTTCAATTTTTCTCCACAAAACCGGACTTCACATCGGATAGATACAAAGTAGAAA  
GAGGGCCGTATGCAAATATTTGCAATGATCATGTAACATTTTTCAATAACTTGCTTGGAC  
AAAACAGAGTTATCACAGATGCAGAAGAATGCGAGGGATATAATATAGATTACTCAAAA  
ATTGTCAGAGGAAAAAGTAAAATTGTATTGAAACCGAAAACCTACCAACGAAGTATCTG  
CCATATTAAAATATTGTAACGAAAATCGTTTAGCTGTATGCCCTCAGAGTGGAATACAG  
GTCTCGTTGGCGGTAGCGTGCCAGTTTTTTGATGAAATTGTTATTTCTATGAACTTATGA  
ATAAAATTATTGAACTAATGAACTAGCAGGAGTGCTGACTTGTGAAGCTGGCTGCGT  
GCTCGAAGATCTGGAAAATCATTAGCGACAGTAGATTTAATGATGCCGATTGATCTCG  
GCGCTAAAGGTAGTTGTCTGATCGGTGGCTGCGTATCTACAAATGCTGGTGGTTTAAGA  
CTTCTTCGTTATGGTAATCTTCATGGAAACATTTTGGGTCTCGAAGCCGTAAAAGCAAA  
TGGGAGTGTGGTGGATTGTTTAAACACACTGAAAAAAAACAATACCGGTTATCATCTA  
AAGCATTATTTATCGGATCTGAGGGAACGCTAGGGATTGTAACGAAAGTCGCAATTCA  
ATGTCCACCTCTTCTACAGCTGTCAACGTTGCGTTTTTTAGGATTAAACAATTTTGACA  
AAGTATTGAAAGCGTTTTCGTCTAGCTAAAAAAGAATTGGGAGAGATTCTGTCTTCGTTT  
GAAATGATGGACAAATTGTCATTAGATGTTTCCATTGAACTTTTGGTTTAAAAAGTCC  
ATTGACAACAAAGATCGACGGCCATGACTTTTATGTGTTGATGGAACTTCTGGTAGCA  
ACGTAAATCACGATGAAGAAAACTTACTTCTTTTGTGGAAAAGGCGCTTGCCGACGA  
TATCATTGAAGACGGTACTCTGACTTCTGATCCTACTAAAATTAAA

>novel\_circ\_000144

AGCAAGCAAATCACCTGAACTTGTTCAACAACCGGCAGCAACCGAAGAAGAAGCGCA  
AGAGTCGAACAGCATTTACGAATCAACAGATCTTCGAATTGGAGAAACGATTCTTATAC  
CAGAAGTATTTGAGCCCGGCCGATAGGGACGAGATTGCTGCGCAATTGGGACTGAGCA  
ACGCTCAGGTGATCACGTGGTTCCAGAATAGGCGAGCGAAGCTAAAAAGAGACATGG  
AGGAGTTGAAAAAGGACGTGCAGACAGTGAATCCTCTGTTAGTCGCTCAACATCACA  
AGACGTTTTTTAGAGAACGTTCAAGATCTTGGAATCCTGAAGAAACGACCCTTGCCGAG  
CATGGACGAGAAGTCGTAGGGAACGAGACGCCTCGATGCTCGTCGTTGAGGGAAAAT  
CGTGATTTCTTAAACTAGAGGCTTACACAGGAAAAAAAAAACTCTATTGATCTAGAG  
TGATCGTTTGTGCGATTGTAGCAAGCGTTTTCTATAATGCAATCGTAAAATTACGCAAAAG  
TGAAGTCATACTTGTTCTTTTTTTTCTACGTGAATCGACTCGAACGAAAGATTTTGAGG  
TTAGGATTTTCGTAGTTCTGTTTTCCGTAGTATACGATATTACGAGTATAATATTGGGGGA  
AAATAGGAATTGTGATCGTTGTGACAGCGTGTTTTTTTTTTCTTTTTTTGGAAATATTT  
GATACATTATAGAAAATTGTGGATAGAGATGGAGGATACGACTAGGCATAGTACAAAGA

AAGCGTCTTCTTCGACAATATATCGCGGGAAACGAAAGGAGAAACAATTGTTTCGACG  
AAACAATGAAATAGGCGGAATTCGTTTCATAGAAATTACGCATTGATTTCTGTCGGTTATC  
CGTGATGTCGATACGTCGAGAAGATGTACAAAGACTGAGAGAGTCTGCAAAAGTCTG  
ACGGATGATAAGGCGACGTTGATGAGGCGATTGAAAGTGATCGTGGCATGGCGAGGTG  
AGAATATTAAAATGAATCTTTTAATTGTTTGTAATTAAAGACTGCCAAATATATTCACA  
GCTGGCCCTCGTCGACCTCCGGTCCATCGAATGACATTTTCGAAATCAGGATCGGATCA  
CCCCGTGTTCTCAGCCATTTTACACAAAAATTTTATCAGGCGAGGCGATGTCAGACGG  
AAGATATAAATTCTACGTTACACGAAAGAAAGGAAGAGAAATACGTGTTCTGACCAAA  
ATGTTAAACGGATTTTACGTTTCCTTTAACGAATACGTAGGACGACTATTCCTCGGACA  
CCTGTATCATATTGTATTTATTTGCGGAAAGACGAGATGAAGGGAATCGCGATGAATAA  
AAATCTAAAAGTGATCCAGAAGAAGCATCGATGATTTAT

>novel\_circ\_000146

CCCAGATCGAAATAATCCCGTGCAAGGTGTGTGGCGACAAGAGCAGCGGTGTTTCATTA  
TGGTGTGATCACCTGCGAGGGGCTGCAAAGGCTTCTTCAGGCGGTCCCAGTCGTCGGTC  
GTCAACTATCAATGTCCGCGGAACAAGAATTGCGTGCGTACCGTGTAAACAGAAACC  
GGTGCCAGTACTGTCGGTTGCAAAAGTGCCTACGCCTCGGCATGTCTAGAGATGCGCG  
CGCGCGTACTCTTCCTGTTGTCATCTCTCTCTCCCTCCCTCCCTCCCGCACCTCTCTCTC  
GAGCGCGCAGCCACGCTCCTTCGCCTGCCTCGTCCCGTCCTCGTCTCGCAGCCACGAG  
CCCCTGTCCGCCCTCTCTGTCCCTCGTTCGCCACGTTCCGGTCGATCACCTCCGCTTCT  
ACTCCTCTTCGTCGTTTCGACCGGCCGCTCTTTCTCTTTCTCTCTCGTTCGCGCGCGATCC  
CGATAGCGGTTTCAGCTGGCAGCTGACGGTCGCGAGAGACGCTCGCCTGTCTCTCTCT  
CTCTCTCTCTGTTTCTCCCCCTTTTACCAGTTTCTCGTTCACAAACCGTTGTCGGATCT  
CTTCCTCGCGCTGCCTGCTAACCCTCCTCTCTTCTCTCCTCTCCTTTATACATCACGGTG  
GCATGAAGTCGCGTGCGTGAAGTCACGCGTGTGTGCGCAGCGAGCAAACGGACCGAGA  
TCCGAGATTCGTTGCGTTGAGAGTTTCAAGGAAGGGCGGAAACTGAGCTGCCCTCTGC  
CTGTGGCGCCAGGATTCGGTTTTTTGGAGCGTGAAGAGGGAGGGATGTTGAGTTGGGAT  
TTGATTAATTGCGATGCGGATTTTGGGGGGATTGGGGGAAGCCGTTAAATTGGGGCGCA  
TGTCGAAGAAGCAGCGGGAGAAGGTGCGAGGACGAAGTTAGGTTCCACAAGGCACAA  
ATGAGAGCGGCCTCCGAGACTGCGCCCGACAGCAGTGTGTTTGAACATCAGACCCCA  
AGCAGTTCGGATCAACATCATCCTTTCAATGGCGGGTATACGTATGGCGGTAGTGAATA  
CGCTTCCCCTGGCCCCGGAACGGGCGGGTCGGGTTATTACAATCATCAAGCGATGACG  
AACTACGAGCTTAGCGCCGACTACGTCGACAGCACGACGACCTACGATCCACGACCGA  
CGCAGACGCAGGTGCGGGACACTGTGCCCCCTGATACACCCTCCGCTGGAGTAGCAGC  
TGGAGTACTTCCCAGCGTGGTCACCACCG

>novel\_circ\_000147

CCCAGATCGAAATAATCCCGTGCAAGGTGTGTGGCGACAAGAGCAGCGGTGTTTCATTA  
TGGTGTGATCACCTGCGAGGGGCTGCAAAGGCTTCTTCAGGCGGTCCCAGTCGTCGGTC  
GTCAACTATCAATGTCCGCGGAACAAGAATTGCGTGCGTACCGTGTAAACAGAAACC  
GGTGCCAGTACTGTCGGTTGCAAAAGTGCCTACGCCTCGGCATGTCTAGAGATGCGCG  
CGCGCGTACTCTTCCTGTTGTCATCTCTCTCTCCCTCCCTCCCTCCCGCACCTCTCTCTC  
GAGCGCGCAGCCACGCTCCTTCGCCTGCCTCGTCCCGTCCTCGTCTCGCAGCCACGAG  
CCCCTGTCCGCCCTCTCTGTCCCTCGTTCGCCACGTTCCGGTCGATCACCTCCGCTTCT

ACTCCTCTTCGTCGTTTCGACCGGCCGCTCTTTCTCTTTCTCTCTCGTTTCGCGCGCGATCC  
CGATAGCGGTTTTCAGCTGGCAGCTGACGGTCGCGAGAGACGCTCGCCTGTCTCTCTCT  
CTCTCTCTCTGTTTCTCCCCCTTTTACCAGTTTCTCGTTACAAACCGTTGTCGGATCT  
CTTCCTCGCGCTGCCTGCTAACCTCCTCTCTTCTCTCCTCTCCTTTATACATCACGGTG  
GCATGAAGTCGCGTGCGTGAAGTCACGCGTGTGTGCGAGCGAGCAAACGGACCGAGA  
TCCGAGATTCGTTGCGTTGAGAGTTTCAAGGAAGGGCGGAAACTGAGCTGCCCTCTGC  
CTGTGGCGCCAGGATTCGGTTTTTGGAGCGTGAAGAGGGAGGGATGTTGAGTTGGGAT  
TTGATTAATTGCGATGCGGATTTTGGGGGGATTGGGGGAAGCCGTTAAATTTCGGGCGCA  
TGTCGAAGAAGCAGCGGGAGAAAGTCGAGGACGAAGTTAGGTTCCACAAGGCACAA  
ATGAGAGCGGCCTCCGAGACTGCGCCCGACAGCAGTGTGTTTGAACATCAGACCCCA  
AGCAGTTCGGATCAACATCATCCTTTCAATGGCGGGTATACGTATGGCGGTAGTGAATA  
CGCTTCCCCTGGCCCCGGAACGGGCGGGTCGGGTTATTACAATCATCAAGCGATGACG  
AACTACGAGCTTAGCGCCGACTACGTCGACAGCACGACGACCTACGATCCACGACCGA  
CGCAGACGCAGGTCGCGGACACTGTCGCCCCCTGATACACCCTCCGCTGGAGTAGCAGC  
TGGAGTACTTCCCAGCGTGGTCACCAACGGGAAGTCGCTGTCTGCCTCGACGACCGGA  
AGCAGCACGGGGGGTGGTGGTGGAGGCGGTGGTGGTGGTGGTGGTGGCGGTGGTGGT  
GGTGGTGGTAGTAGCGGCGGCGGAGGCGGTGGTGGCGGTGGTAATGGCGGTGGTGGGA  
TCCGGTGGTGGTGGCTCGGGTGGTGGAGGGAGCGGTTCTGGCACCGGGGGCGGTGCG  
GCCGCCGGTGGCGGCGGTGGTGCCGTTCCCTGAGCGGGGGTGAATCGTTGCTGTTA  
AGCAAGAGACCACCGTCGAACTGGCCAGCTTGGGCCACGGCTCGTACACGATGGTCG  
ACTCGACGACCTTTCTGAGCGGTCAGCAACAGAGGGTCAGCAATCCATCCGAGGACG  
ACGAAGTGCCGAGTCTGCCCAGTATGTCCCATGCGAGATATCCGGCACAGATCAGCGA  
GTTGCTCTCAAAAACGATAGCGGATGCACACGCAAGAACGTGTCTGCTGTGACGGA  
ACAGATCCAGGAATCTTTCCGGAAGCCGCATGATCTCTCCAGATTGATCTACTACAAGA  
ACATGGCGCACGAGCAGCTTTGGCTCGAGTGTGCCCAAAACTAACCACCGTTATCCA  
GCAGATCATCGAGTTTGCTAAGATGGTTCCCTGGATTTCATGAAGCTCTCGCAGGACGACC  
AGATTGTTTTATTAAAGGCTG

>novel\_circ\_000148

CCCAGATCGAAATAATCCCGTGCAAGGTGTGTGGCGACAAGAGCAGCGGTGTTTCATTA  
TGGTGTGATCACCTGCGAGGGCTGCAAAGGCTTCTTCAGGCGGTCCAGTCGTCGGTC  
GTCAACTATCAATGTCCGCGGAACAAGAATTGCGTGGTCGACCGTGTAACAGAAACC  
GGTGCCAGTACTGTTCGGTTGCAAAAGTGCCTACGCCTCGGCATGTCTAGAGATGCGCG  
CGCGCGTACTCTTCTGTTCATCTCTCTCTCCCTCCCTCCCTCCCGCACCTCTCTCTC  
GAGCGCGCAGCCACGCTCCTTCGCCTGCCTCGTCCCGTCCTCGTCTCGCAGCCACGAG  
CCCCTGTCCGCCCTCTCTGTCCCTCGTTCGCCACGTTCCGGTCGATCACCTCCGCTTCT  
ACTCCTCTTCGTCGTTTCGACCGGCCGCTCTTTCTCTTTCTCTCTCGTTTCGCGCGCGATCC  
CGATAGCGGTTTTCAGCTGGCAGCTGACGGTCGCGAGAGACGCTCGCCTGTCTCTCTCT  
CTCTCTCTCTGTTTCTCCCCCTTTTACCAGTTTCTCGTTACAAACCGTTGTCGGATCT  
CTTCCTCGCGCTGCCTGCTAACCTCCTCTCTTCTCTCCTCTCCTTTATACATCACGGTG  
GCATGAAGTCGCGTGCGTGAAGTCACGCGTGTGTGCGAGCGAGCAAACGGACCGAGA  
TCCGAGATTCGTTGCGTTGAGAGTTTCAAGGAAGGGCGGAAACTGAGCTGCCCTCTGC  
CTGTGGCGCCAGGATTCGGTTTTTGGAGCGTGAAGAGGGAGGGATGTTGAGTTGGGAT  
TTGATTAATTGCGATGCGGATTTTGGGGGGATTGGGGGAAGCCGTTAAATTTCGGGCGCA



GTCGTAGAAATGGCAAACAACCTAACACGAAAATGCAGGAGGTCTTGAAGAAAACGA  
 TCGAGGAGGCACGAGCTATGGTTTCGAAGAAATTGATACAGCAAGAAAAATTGGTGAC  
 GCAGAAAACAGTTCAAGAGGCATTGGACATTCTCAGAGGTGCTGTGATGATCGTTTAT  
 CCGATGGGACTTCCGCCTCATGATGTTATTCAACAAGAATTCGAAAATACGGAAGATTT

GAGCGGAACTCAAGCATCACTTGAGGTTATCGACGTGCAACTGGCACAACCTTTGGTTTC  
TCAGGAAAAGAAATGATAATAGGAAAGAAATTAAAGGATTATTTGGGGATGAACGAAA  
AGACAAAAATCATTGTGAAACTGCAGAAAAGGGGAGCTGGAAAACCTGCTCGTGAAC  
CATTGATGTCAGAAGAAGAACGAAAACAATAATGCTGCATGCCTACAGACGTCAAGA  
ACAGCTCAAG

>novel\_circ\_000153

GAAAGTCTGCCGCCATTGAACTCGCGGGAAGAATCGCAGGAGAGGCGTCGAAAGAGG  
AGTTCCAGGGAGAGCGACTCTCGCGAGAGACTGACCGATCGGTGTCCAGAGAACTCG  
GCCGGTCTCGAGCTGAGCACGAGCATCGCGGATTGCTGTTGCATAGGTCCACGTTCCG  
GTCTACCGTTGCCGAGGATCCCGCCGTCGACGACGATCGCCTCTTCGTCTCTCCGTGC  
GTAACAGGCGGAGGTGGTGTAGGTGGAGTTGGAGGTGGCGGTGGAGGAGTTAGCTGT  
GGACAGTCTCCTTTTCCTGGGCCTCCACGTCTTCGAACAGCCGTGTTGCCGGCGTGG  
AACAGCCGGCGACGCTGACGACGCCAACGACGACGTGCGCGCAACCGACGTTGGTG  
AACTCTAATAATAACCGAGGGATGCTGCAAATGTCGGTGGGGAACAGCACTGGCCAAC  
AGCACCATCAGGCACAATCGTCTGCGGCTCTAACGGCGGCGGTACCGTCGGTATCCAC  
CTCCACGTCGTTCAACACGTCGTCCACCGCCGTCCCGACGCTGCAGTCCGTCTCGGTA  
CCGCGACAGTTAGCACAGTGGACCAAGCATCAGACGCTGAAGCTGCAG

>novel\_circ\_000154

GTGACGTACCCAATGATTGTACGTTGCATGCTGGTGTCTGGTTGGTCGCCCTGGCATT  
GACAAGTATGCCAATGATGGGTTTTGGCGTGTACTACAAAGGTGAACGATGCGTACGAT  
ACAGGGAAGCCACCGAGCCAGCTGACATCGTTACGCGTATGTTTGGTTTCGTTTTCGGT  
ACGGGTCTCTGCCTGTGATAGTTTGGTGCAATCTGGCCGTTTCCAGGGCGCTTAGCAG  
GCTAAGTCGTAAAGCTGGCGTCCTCAGGCGAGTAACGAGATCCTCCTCGAGGGCGAA  
ACCACTTTTGACAGTGACGGGGCCAGCGCCGGAATCGTCACCACCGCCGAGGAAAG  
GGCATTTCGCAAGATTGATGGCCGTGCTATCGATATCGTTCGTTCGTATGCTGGATGCCGCA  
AATGATTTCCATTCCATTGGCACAATTCGCGATGCAGTTGCCAGAGAAGGCGATACTCG  
CGCGAAAATTGATTCGTATATTTACCTGGCCGCCGACGTGCTCCTTTGCATTCACTTCA  
CCCTGGATCCGTACATTTACGTGTTGTTAAGGATGCCACGGCCGAGATTCCGCCTTCTG  
AAACCCCTGTGCAAGATCTGTTGGCCAGCAAGAAGCCGGTCGAGCTCGTTCAATG

>novel\_circ\_000157

GAACCGATCGTTATCGAGAAAGCGGGCGACGAGGAGGCGGCGGTGATTTGCCAGCCG  
AGCCAGCCAGTCGAACACGAGGAGCACGAGGAAAAGGAAGCGGCGATGAACGTGAA  
GATCGAGACGTCGTACGAGGCACCGGCACGGATCGAGGAGTCGATCGACGTGCACGA  
TACACCTGAGACCGTCCCTGCGCCTGAAAGACCGACGACCTTGACCTTTGGCAAACA  
GGAAATGGCCACGGTGGACACGATCAGCCTACTCAGCCCCATATCGCCCATCTCGAAA  
CAGATTTTGCCACTGAATCTATCCAGTGACGAGGAAATAGTGACAGGGTTGGCGTTTC  
CCCTGGGGGCCGCCGACCAGCGTGGAACCCCCGAAGGAGAAACCACCGCCGCCTCCGG  
TAGACGTCAGCGACGAAGAGAATCTTCCAGTGGAACCTCTCAAGAGATTGAACTCCAC  
CCGCAGAATAAAGAAGGAACTACGCACGAGACGCTCTGATTCCTTGGAATCGAGGG  
GGTAAACGATGACGAGCTGGAACGCGAGTTGACCCTGACAAAACCGCCAGACATGGC  
GGCGATCCTTGCAGAGGAGAGACGCATCGAGCAGCTTCATCGTCGCTCCTACGATACG

GACAGCAATTACGAGCAAGACTCAAGCCACGAGAGAGATTTCGGGCGTGGAATTGGGC  
CACGCCGAAGATTGGACTAAACAACCAGTTAGCCCTGATATGTCTCAGCACAGTCGCC  
AAAGCAGCGAGCCGTTTCGGCGCCAGTGTACCTCCTCCGAAGAGGACGAAATCACGA  
AGAAAGAGAAGGAGATCATCGAAGTCCTCGAGAAAGAGGAGCAGTGGCGGTACGAG  
ACAATCGTGAGATGAACAGTGAAGTTGGGCGAAAAATTGGCGCACAAAGCTGCGCGAA  
CTCGAAGAGGAGAAGATGCAGTTGGAGAGGGAGCGCGCCCAGGAAGCGGCCCTCCG  
CCGACAGGAAGAGACGCTGCGCAAAAAACAACGAGGACAACATACGGAAACAGGAGG  
AGACGGCGAGACAGCAGGAGGTGGCGCGGGCTGAGGCAGAGGCGAAACGCGCCGAG  
GAGAAGAGGCAGGAAGAGGAGCTGAGGGCGCAGGCAGAGAAGCTGAGGATTCAGAA  
TGAAATCGAGGAGGAGAGAAGGGTTGCCGATGCGCGACGTGTCGAGGAGAAACGCAT  
TAGGGACATGGAAAACCAAATTCGAGAACAAGAG

>novel\_circ\_000158

GAACCGATCGTTATCGAGAAAGCGGGCGACGAGGAGGCGGCGGTGATTTGCCAGCCG  
AGCCAGCCAGTCGAACACGAGGAGCACGAGGAAAAGGAAGCGGCGATGAACGTGAA  
GATCGAGACGTCGTACGAGGCACCGGCACGGATCGAGGAGTCGATCGACGTGCACGA  
TACACCTGAGACCGTCCCTGCGCCTGAAAGACCGACGACCTTGACCTTTGGCAAACA  
GGAAATGGCCACGGTGGACACGATCAGCCTACTCAGCCCCATATCGCCCATCTCGAAA  
CAGATTTTGCCACTGAATCTATCCAGTGACGAGGAAATAGTGACAGGGTTGGCGTTTC  
CCCTGGGGCCGCGGACCAGCGTGGAACCCCCGAAGGAGAAACCACCGCCGCCTCCGG  
TAGACGTCAGCGACGAAGAGAATCTTCCAGTGGAACCTCTCAAGAGATTGAACTCCAC  
CCGCAGAATAAAGAAGGAACTACGCACGAGACGCTCTGATTTCCTTGGAATCGAGGG  
GGTAAACGATGACGAGCTGGAACGCGAGTTGACCCTGACAAAACCGCCAGACATGGC  
GGCGATCCTTGACAGAGGAGAGACGCATCGAGCAGCTTCATCGTCGCTCCTACGATACG  
GACAGCAATTACGAGCAAGACTCAAGCCACGAGAGAGATTTCGGGCGTGGAATTGGGC  
CACGCCGAAGATTGGACTAAACAACCAGTTAGCCCTGATATGTCTCAGCACAGTCGCC  
AAAGCAGCGAGCCGTTTCGGCGCCAGTGTACCTCCTCCGAAGAGGACGAAATCACGA  
AGAAAGAGAAGGAGATCATCGAAGTCCTCGAGAAAGAGGAGCAGTGGCGGTACGAG  
ACAATCGTGAGATGAACAG

>novel\_circ\_000159

GAACCGATCGTTATCGAGAAAGCGGGCGACGAGGAGGCGGCGGTGATTTGCCAGCCG  
AGCCAGCCAGTCGAACACGAGGAGCACGAGGAAAAGGAAGCGGCGATGAACGTGAA  
GATCGAGACGTCGTACGAGGCACCGGCACGGATCGAGGAGTCGATCGACGTGCACGA  
TACACCTGAGACCGTCCCTGCGCCTGAAAGACCGACGACCTTGACCTTTGGCAAACA  
GGAAATGGCCACGGTGGACACGATCAGCCTACTCAGCCCCATATCGCCCATCTCGAAA  
CAGATTTTGCCACTGAATCTATCCAGTGACGAGGAAATAGTGACAGGGTTGGCGTTTC  
CCCTGGGGCCGCGGACCAGCGTGGAACCCCCGAAGGAGAAACCACCGCCGCCTCCGG  
TAGACGTCAGCGACGAAGAGAATCTTCCAGTGGAACCTCTCAAGAGATTGAACTCCAC  
CCGCAGAATAAAGAAGGAACTACGCACGAGACGCTCTGATTTCCTTGGAATCGAGGG  
G

>novel\_circ\_000160

ATCACGCACGAGCCGCCAAAATTAAAAACGACGCTGAAAACGCCTCCGAAACAAGCG

ACCAATCCTCTTCAATTCGTGAAAGTCGGGCGTGCTCTTTGTATCGCACAGCTCAGGA  
ACAATTGCAAAAAGTTCAAGAGGTGAAGAAAATAAAGCAAGAAGTCCGCGATGATCC  
CGAAGATTGGCAATCGAATTTAGACAACTGGAAGAGCAGTCGAAGGAAGCGCCAGGA  
GCACATCATCGAGCGAGTGGTCGAGGTGAAGAACTCGAGCTGGAGGAACACGATCG  
GCAGCGTCGCCGGAGCAAACTTTCTCGGAAATGATGGAGGAGAGGGGCAACAGGG  
GTCGGAAATTGAGCATCAGCTTGGCCATGTACCACGAGGAGGATGCCAATGATCTGAG  
CGATCTTGGTATAGGCACAAGTAGCGGGAAGAGTTCGGTTAGTGGAGATACTCATGAC  
GACACACATAGCGTTTTGAGCGATAGAGACAGCGAAATAGAGAAAAATCACTCGGAC  
GTGGACAACGTGCAAAGCGAGAGCGCGATCCACAGCGATATCACGACGTCGTCGGCG  
ACCACGACTGCGACCACGACAACGGCGACGAAGAAATCTTTCGGCAACGGATTCCAC  
ACCAATCACAGTCACAACAATCAGGAGTACGATTTCGGCGACCACGGCGACGACCAGC  
TCCCCGGAGCCGGAGGAGTACACGTACGAGGGTGCGATTTCGAGGTTACGTGTCGCGA  
GTGTCGCAAAACATACCGAGGCGATCGTTGGTGAATCTGGATTTCGAAGCTTGACAACG  
TCGCGAAATCGTCGACGAACGGCTCGAAGCTGAGCCTGGCCGACGAGGCGAAATCCA  
CCATACCCGTGGTAAAAGTCGATATCCTGAAGAGGCGGGAGATATTCGAGAAGGGATC  
GCAGAAGAGCAACGAGACGAAAACGAACAACAGGCTCTCCGGCGATTTCACCGGGA  
CGAAATCTATCAAGGAGCGGCTCTCGAACCTGGAGAAGCAGAAGCACGAGGCGGAGA  
ACAGCGAGAAGGCGTTGGGGAGCAAGGCGTTGAACAGATTATCGGGCGACATGAGCT  
CGATCCGCGAAAGATTGTCCCATCTGGAGAAGCAGGCGTTGGAGAGGGAGAAGAGTT  
GTTGCGCTCATCGTAAACTGAGCACCGAAGAGTTGGAGACGGTGAGACCGTTGCGGG  
ACAGATTGTCCACCCTGGAGAAATACAGCAGCAGCGACGAGTCGTCGTCGGCGCCTG  
GCGCGGCTCACGAGTCACGACACAACGGCGAGCTGTCCGCCAGATCGATAAAGGATC  
GTCTCAGCGCCTTGGACGCGGCCAGGAACAAAGAGACGGCCGACAAGAGGTCTCTCCG  
TGGGCAAGCACTCGCTCTGCTTCCGGGATCAGGAGAACAGAATCGACACCTCGACTCC  
TAGCGAGAGGAGCTCGTCCCCAGACTCGGAGTATCGCGTGCCGAGGGCCGCCTTCCAC  
AGAAGCCTCGACTCCTTGGACGCGGACGCGTCCAGCGGCCCCGACACGTTTCGAGCGC  
GTGCAAAGCTTGGAGGAATTGGATTACGGGAGGCGTTATCCGGCGTCTCTCGTCGTCG  
CCGAATGCTGAACGACACCGATCGCGAGGATTTCGGGCATTACACGGCCGACGTGA  
GCTGCTCCGTCAGCCAAGCCGACGAGCCGGTCGACGAGGACATCGTGCACTCTAACA  
CGATCATTGAGAGGCAGGAGGTGATTGAGGAGAAAGGCGAGGAGCCGCGCGAAGAA  
ACGGCGAACGAGAAGGTGCGTGAACAACAACAACAGCAACAGCAACAACA  
ACAACAACAACAGAGCACTGCTGTATCCGTGAACGAGATCTCGACGACTTCTGCCAGC  
CAACCGGACGCAGTAACGGCAAAGAAG

>novel\_circ\_000161

GGACGAGGCGTAGGATGGGCCCCGACCGCGCGAGCTGTCTGTGCTACACTGAAGAGGAG  
GAGCTCCCCGAAGAAGAGAGAGAGAAGGAGGAAGGAACGAAGGATGCCCGCCTCG  
CAGACCGCCGCCACGGAGCGGCGAAACGAGAGGATGATCACGCACGAGCCGCCAAA  
ATTAAAAACGACGCTGAAAACGCCTCCGAAACAAGCGACCAATCCTCTTCAATTCGTG  
AAAGTCGGGCGCTGCTCTTTGTATCGCACAGCTCAGGAACAATTGCAAAAAGTTCAAG  
AGGTGAAGAAAATAAAGCAAGAAGTCCGCGATGATCCCGAAGATTGGCAATCGAATTT  
AGACAACTGGAAGAGCAGTCGAAGGAAGCGCCAGGAGCACATCATCGAGCGAGTGG  
TCGAGGTGAAGAACTCGAGCTGGAGGAACACGATCGGCAGCGTCGCCGGAGCAAA  
ACTTTCTCGGAAATGATGGAGGAGAGGGGCAACAGGGGTCGGAAATTGAGCATCAGC

TTGGCCATGTACCACGAGGAGGATGCCAATGATCTGAGCGATCTTGGTATAGGCACAA  
GTAGCGGGAAGAGTTCGGTTAGTGGAGATACTCATGACGACACACATAGCGTTTTGAG  
CGATAGAGACAGCGAAATAGAGAAAAATCACTCGGACGTGGACAACGTGCAAAGCGA  
GAGCGCGATCCACAGCGATATCACGACGTCGTCGGCGACCACGACTGCGACCACGAC  
AACGGCGACGAAGAAATCTTTCGGCAACGGATTCCACACCAATCACAGTCACAACAAT  
CAGGAGTACGATTCGGCGACCACGGCGACGACCAGCTCCCCGGAGCCGGAGGAGTAC  
ACGTACGAGGGTGCATTTCGAGGTTACGTGTGCGGAGTGTGCGAAAACATACCGAGGC  
GATCGTTGGTGAATCTGGATTCTGAAGCTTGACAACGTGCGGAAATCGTCGACGAACGG  
CTCGAAGCTGAGCCTGGCCGACGAGGCGAAATCCACCATAACCCGTGGTAAAAGTCGAT  
ATCCTGAAGAGGCGGGAGATATTCGAGAAGGGATCGCAGAAGAGCAACGAGACGAAA  
ACGAACAACAGGCTCTCCGGCGATTTACCGGGACGAAATCTATCAAGGAGCGGCTCT  
CGAACCTGGAGAAGCAGAAGCACGAGGCGGAGAACAGCGAGAAGGCGTTGGGGAGC  
AAGGCGTTGAACAGATTATCGGGCGACATGAGCTCGATCCGCGAAAGATTGTCCCATC  
TGGAGAAGCAGGCGTTGGAGAGGGAGAAGAGTTGTTGCGCTCATCGTAAACTGAGCA  
CCGAAGAGTTGGAGACGGTGAGACCGTTGCGGGACAGATTGTCCACCCTGGAGAAAT  
ACAGCAGCAGCGACGAGTCGTGTCGGCGCCTGGCGCGGCTCACGAGTCACGACACA  
ACGGCGAGCTGTCCGCCAGATCGATAAAGGATCGTCTCAGCGCCTTGAGCGCGGCCAG  
GAACAAAGAGACGGCCGACAAGAGGTCCTCCGTGGGCAAGCACTCGCTCTGCTTCCG  
GGATCAGGAGAACAGAATCGACACCTCGACTCCTAGCGAGAGGAGCTCGTCCCCAGA  
CTCGGAGTATCGCGTGCCGAGGGCCGCCTTCCACAGAAGCCTCGACTCCTTGAGCGCG  
GACGCGTCCAGCGGCCCCGACACGTTTCGAGCGCGTGCAAAGCTTGAGGAATTGGAT  
TACGGGAGGCGTTATCCGGCGTCCTCGTCGTCCGCCGAAGTGTGAACGACACCGATC  
GCGAGGATTCGGGCATTACACGGCCGACGTGAGCTGCTCCGTCAGCCAAGCCGACG  
AGCCGGTCGACGAGGACATCGTGCCTCTAACACGATCATTGAGAGGCAGGAGGTGAT  
TGAGGAGAAAGGCGAGGAGCCGCGCAAGAAACGGCGAACGAGAAGGTGCGTGAA  
CAACAACAACAGCAACAGCAACAACAACAACAACAGAGCACTGCTGT  
ATCCGTGAACGAGATCTCGACGACTTCTGCCAGCCAACCGGACGCAGTAACGGCAAA  
GAAG

>novel\_circ\_000163

CCTTGTTATTAGGCACTTTGAAGACCTACCAGCGAGCAGCCTGCGACGAAGAATCGAT  
GACGCTCAAGTGTCCACTAGGTACCACCATCTCCATCGTTCTGGCTCAATATGGAAGAG  
CGGGACCAAATGGTACCGACAGATGCAATACCTATTCAGAACCATCGATGTATCTCGGG  
GACAGACAAACGAATCAGACTTGATCTGGCCTCAGTCGCTACAGACGGTGGTGAA  
GTATGTCACAAGAAGAGGCAGTGCAAGTTCAACACCAGTCCGAAAACCTTTCAGGGC  
GATCCGTGTCCTGGATTGCCGAAATACATCGAGGTCGCCTATCAATGCCGTCCTT

>novel\_circ\_000165

GCACTTTGAAGACCTACCAGCGAGCAGCCTGCGACGAAGAATCGATGACGCTCAAGT  
GTCCACTAGGTACCACCATCTCCATCGTTCTGGCTCAATATGGAAGAGCGGGACCAAAT  
GGTACCGACAGATGCAATACCTATTCAGAACCATCGATGTATCTCGGGGACAGACAAA  
CGAATCAGACTTGATCTGGCCTCAGTCGCTACAGACGGTGGTGGAAGTATGTCACAA  
GAAGAGGCAGTGCAAGTTCAACACCAGTCCGAAAACCTTTCAGGGCGATCCGTGTCC  
TGGATTGCCGAAATACATCGAGGTCGCCTATCAATGCCGTCCTT

>novel\_circ\_000166

TACTCACTGTTGCAGACGGTGGTGGAAAGTATGTCACAAGAAGAGGCAGTGCAAGTTC  
AACACCAGTCCGAAAACCTTTCAGGGCGATCCGTGTCCTGGATTGCCGAAATACATCG  
AGGTCGCCTATCAATGCCGTCCTTATGAGTTCAGAAGTAAAGTTGCCTGTGAGAATGAT  
GTCATCAATCTTGTCTGCCATCCAGGACAGAGGGTTGCCATTTTCAGTGCATCGTTCCG  
TAGAACGGAATACGAATCCCTTCAATGTCCACAACCCACGACGTAAAGGAGGAAACT  
TGCATGGCATCGTACGCGACAGAAACCGTGATGAATTTGTGCCATGGAAAACGACGCT  
GTTCCGGTGGTTGCAAACAGTTCGACATTCGGTGAACCCTGTAGCCCGGAAAGCAGAA  
CGTATTTGAAAGTTGTTTACACGTGTG

>novel\_circ\_000167

ATACGTTTTTTTTCTCGTGAACGAGTGAACAAACCAAACCGCCACCATGGACGCGATC  
AAGAAGAAGATGCAGGGAATGAAGCTGGAGAAGGACAACGCGATGGATCGCGCGTTG  
CTCTGCGAACAGCAAGCTCGTGATGCGAACGCGCGAGCCGAAAAGGCTGAAGAAGA  
GGCGCGCGCCTTGCAAAAAAAGATCCAGACCATTGAAAATGAACTCGATCAAACCTCA  
GGAGGCTCTTATGCAGGTCAATGCCAAACTTGAAGAGAAAGATAAAGCGCTACAAAA  
C

>novel\_circ\_000168

GTGGCACCTTCCCTCCACTTGCTCCACCCCGCCCCGCCCTTTGACGATGCAGTGCG  
CTCAAACGACCAAACCTTGGCTTCTGGTGGTCAACTTCAACAGGGTGCACCGACCAC  
AATGTTAGCGAGCAGCCTGAGCACTGCTCAATCGAAACAGAATAAGGTTGTTACCAT  
GTCACTCTTACAAAGACTTATCACGATGCCGTGAGCATATCTGACGTGCATTTGGAAG  
CAGCGGTAGCGGAAGCGGAAGCGGCGGAAGGGAAACGAAGTCGTCGTTGAGCGTGG  
AAAGTGGTGGAAAGCAGTCGAGGAGGTGGTGGATTACCTGGACACCACCCGCGGGCA  
GCGCCGAGGGCTCGACGCCCACCTGGACAGAGGGCACACCGTCCTTCACCGAGAGTT  
CCAGCAGCGGTGACGCAG

>novel\_circ\_000169

AAGATGAACGGGATGGAGCAGATCCCTGAAGGTTGAGAGCGAGCGGATCCTCGATATG  
ACCGGCTGCTGCAGAATGCGGCCGACTGCATCGGCGCTCGGCGTCATCGCCATTGTCT  
CCGTGATGATCACTGCCACATCGTCAGAAGCGGGGAACGGCGCCGTGGAGACCAGCA  
TCAATCACCCCGTAGTGACGAGGAGGACCAACGCGTGCGAGGGGACGAGGCGACCG  
CGAACGGAACGGTGGCCGATGACCCGGTCACGCTCCACGACCCACCGACGAGGCTC  
CAATTGCCAGCAGCAAACCTACCCAGTCGCCCTTGGAGAAACCCGCGAACGTCTCATC  
CGAGGAAATCATCGTGGAATCACTGCAGAGGGATCAAAGCGACCTGCTGGTGTCCGTC  
GCGGTGGCGGTGAACGACGAGGTGGACGGCGATCCGTCAGAGTCGAGGTGCGGGGA  
GCGTGAGAGTGGTGGGAGGAGCAGGGGCGGGGTGCAGCAAGCGAGCAAGGATTTG  
TCGCGTCGACCCGGCCGAATCGAGTGGAAGTCGCGTCGAGTGTGCTGGACCAGTTGG  
ACGGCGTCCAGGCGGAGGACGAGGGTTTGTGCAACGTTGTGGAGCGCGGGGAGAGC  
AACGTGGACAAATGGCGGAGAGGAGGTGGCTCTTTCACGACCGCGTCCGTCCGCGAG  
ACGATCTCGACGGAGGTGGCGAGGCCGATCGAGCGGAAGAACGTGGAGGACATCAGG  
GCGATCTCGTTCCAAGTGCCTGCGGTTGTGAGGGGGTGGAGGAGGCCGTGGACAGG

CAGGGCAACGAGCAGGCGAGGAAGGATCATTCGAGGCCGGTGAACAATCTCCTGTTG  
GCCGGTGGCAAGTCGACGAAGGCGTTCTACGAGATAAAACCGTCGATCAAAACCGAG  
ATGGAGGGTGATCAGGTGAGCCCCACGATCGCCACCCAAAGGCCCTCCACGGAAGG  
AAGTTCGTGTTGCCCAGCGTGACAGCGCGTTCGGCAAATTTGGCCCTATTTTCGAGG  
ACGGGGATCAGGAGATGAATATCACTGCCAGGATAGGGAGCACCATGCTGTTGGATTG  
CAAGATCGGCATGCTCGGTAATAAGGAG

>novel\_circ\_000170

GCTCATCGACACTCTGCAGACGAAATCCAGAAAGGCGGACGAGGACTTGGAGGCGTT  
CGAAAGCACCGAGCGTGAGATCGATCAGCTGAGGAAGCGTTTGAACGAGGCGCGCGA  
ACGCGCCTCGAACTTGTACATATTCGGGCCGGATCAGGACGCGACCGAGGAGGAGCTT  
GACGAGCTGCGTTGGGCTGTCGAGCAGCTCCTCGAGAGCGGGAAAAAGTTCTCAGGA  
AGCACTAAGGCGCGGTACCAAGCTAGCCAGCAGCTGGTCCCCAGCGATCTTGCCCAAC  
ACCTGACCGCCCTCGAACTTTGCGCCGAGGCGACAGCGCAGGCCATGGAGGAGAAGC  
AGAGGGAGCAGAAGCGCGCGAGAACCGTCAGATCGGATTATCTGACCGATCTGGACG  
AGGTTCAAGCGTGGATCAGGCAGGCCGAGTTGAAGGTTTCAGGACCGATCGATCGAGC  
CTGTACCTCTCAAGGATCAATTGAGGCAGGTGCAAGAGGAGTTGGGCACGATCAGCG  
ACAAGCTCGAACGATTAACGAGAAATGGCCGTACGATTGCGGAGAACACGAGGGACG  
ACACGGAGAAACAATTGATCGACAGCACCGTTCACAACGTGACCGAACAGTTGAACC  
AAGTGAGGAATTGGTTGGACGAGAGGAAACAAGTGGTGGCTGATACCATTGACGCTT  
GGCAGAGATTCTTGTCGTTGTACGAAGCCGTGAGGACGTGGACCGAGGAGAAGAGAC  
AATTCCTGGTTGAGCCGTTGAAGCTCAGCACCCCTCGTGCAGGCTAGGCAGAGGCTGCA  
CGAATATTCGACAGCCGTGAAAAGCTGCAAACAGATCAACAAGAATCTCAGTGACATG  
GGTAAGGAGCTCGAGAGTATCGGTCAGGTTTGCAGCGTGGGCGACTTGCCCGAGAAA  
CTGCTCGAGGCTGAAGAAGCTAAGGTTCAAGTCGAGGGTCAACTGTTGGAGAGG

>novel\_circ\_000171

GCTCATCGACACTCTGCAGACGAAATCCAGAAAGGCGGACGAGGACTTGGAGGCGTT  
CGAAAGCACCGAGCGTGAGATCGATCAGCTGAGGAAGCGTTTGAACGAGGCGCGCGA  
ACGCGCCTCGAACTTGTACATATTCGGGCCGGATCAGGACGCGACCGAGGAGGAGCTT  
GACGAGCTGCGTTGGGCTGTCGAGCAGCTCCTCGAGAGCGGGAAAAAGTTCTCAGGA  
AGCACTAAGGCGCGGTACCAAGCTAGCCAGCAGCTGGTCCCCAGCGATCTTGCCCAAC  
ACCTGACCGCCCTCGAACTTTGCGCCGAGGCGACAGCGCAGGCCATGGAGGAGAAGC  
AGAGGGAGCAGAAGCGCGCGAGAACCGTCAGATCGGATTATCTGACCGATCTGGACG  
AGGTTCAAGCGTGGATCAGGCAGGCCGAGTTGAAGGTTTCAGGACCGATCGATCGAGC  
CTGTACCTCTCAAGGATCAATTGAGGCAGGTGCAAGAGGAGTTGGGCACGATCAGCG  
ACAAGCTCGAACGATTAACGAGAAATGGCCGTACGATTGCGGAGAACACGAGGGACG  
ACACGGAGAAACAATTGATCGACAGCACCGTTCACAACGTGACCGAACAGTTGAACC  
AAGTGAGGAATTGGTTGGACGAGAGGAAACAAGTGGTGGCTGATACCATTGACGCTT  
GGCAGAGATTCTTGTCGTTGTACGAAGCCGTGAGGACGTGGACCGAGGAGAAGAGAC  
AATTCCTGGTTGAGCCGTTGAAGCTCAGCACCCCTCGTGCAGGCTAGGCAGAGGCTGCA  
CGAATATTCGACAGCCGTGAAAAGCTGCAAACAGATCAACAAGAATCTCAGTGACATG  
GGTAAGGAGCTCGAGAGTATCGGTCAGGTTTGCAGCGTGGGCGACTTGCCCGAGAAA  
CTGCTCGAGGCTGAAGAAGCTAAGGTTCAAGTCGAGGGTCAACTGTTGGAGAGGAAC

GCGCTGCTGCAAGAACTAGCGAGGAATGGGAACAATGCGAGCGAAAGATGAAAGA  
AGTGAAAACGTGGATCGAGAAAGCGAAACAAAGTCTCGAGTCGCCGAGAACAAAA  
AGAAACCGTTACGGGATCAGCACAGCATACGGGAGAAAAATGCTGAGCGATATCGCGAT  
ACAGAAAACGAAAATCGGTATATCGATGGAGAAGCTTCAGGTTCACTTCCGGTCGGGG  
ATCGGCGGCGATAGCCGAATAGGCGAAACGGTTGACGAGCTACTGGCCGAGTTAGACA  
ATCTTCACGCCAACGTCAAGGAACAGACCACAGCGTTGGAGGGTTGTTTAGCTCAGAT  
TGATCAATATCAACAGGAGATACAACAGTTGAGGCAACAGATTATGCAGGTAGAGCAA  
CAATTGAGGACAGTGTTGAGTCCGACATACCTGTCCACCGACAAGGAGAAGGCGTTG  
CAGGAGCAACAG

>novel\_circ\_000172

GACATCATACAGGAACGCCTAATGGTTTTACAATTGAGTCTTTCGAACTTAAAAGGAAC  
TTATTTACCACGAGATAACATAGACACTATGCTCTCTGCACTCACGAATTTGATAACGGA  
GCTTCAAAGTTATAATCAAGAGACGCATCACTTGGAAGAGGAATTGCATAAAATACCA  
GCCGATTTAGAGGCTCAAAAGCTTCTATCCAATCTAGAAGAAATTCAAAGTAAAATTAC  
AACCTGTGACGCAAGCGGAACAAGGGCGTGCCACCCTTGAGGGTGCACGTGGACG  
TCAAGAGCAACGTGGCCATGATATTCATGCGTATAAAAAATTCTTGATGAAACGGATA  
GTTGGTTGAAGAATATCGTGGCTAGTATGAAACAGGAATCACCGATTGCTACGAACAA  
GGCTTTACAGGATGAGTTGAGCAGTCACGCGCAGCGGGTATCGGAGCTTGAATCTTTG  
CCAGAGATCAGCACATTGGCAAAAGTCATGAAGAATGCGCTGTTGGAGATGATGTCGC  
GTCTGCAGCAAAGGCAGCAG

>novel\_circ\_000173

GTGACGACTTTCAACGTTGAACAACCTGGGCGTTCGTCTGTGGGAGACAGAGAGCAG  
AAATAAGGATGGCCTTTCATTGGGATAAGCTCTCGCCAGCGGAATTTCAACAACCTCCA  
GGATTTAGCAGCTTATTCACACGAAAGCTACAGGATGTCCTCACTGAGTTTTGCGGAT  
CAAATACAACACCAAGCGGTGCGCCCAAATATCATCCAGATGGTGACATTGATTACGAG  
GGATTTCTGTAAATTTCTGGACACCTATCTCGAAGTGACAACCCCTGACGAACTTTCACG  
ACATCTTTTTTTGTCTTCGTTAAAAAGGTGCCACGAGGAGTCGATGGGAAAGCTTTTA  
AGATTTATCAGAGATAGGAATCTTTCATCAGGAAATGGCCGTGCTCTCGTCGACAACC  
GCTTGTGCCGCCATTACGTCTCACACAACGTCCAGCAGCAACGTGAACAGCACAGGTC  
TACCTGGTGGAACATCGTCGGAGGGTGGACACGGTTCCTCTTTGGCTGACAAAATTCA  
CGGTCTCACAGAGAAATTGCAGGCGTTGGGACATCATAGAACGGACAGTGAAGTCTCC  
ACCAGAGCACGCACAGGAAGCGTTCATCCATATTGACGATACAACAGCACACGTCTGT  
ACAGTTGCCATGACGTGATAGAGAAAAAGAGCACGGACAGCAGCCCGAGCCATAGCC  
AAATGTCGCGGAATTCGTCCAGGAAGTCGAACAATTCCCTCCTCATCAACAACGGGAA  
ATTAGAAG

>novel\_circ\_000174

TGCTCGAAAACCTTGTGGAGGAGGTGTGAAGAAACGAAAAGTGAGTTGCGAACAAATA  
ATGGCTCAGGGGCGTAAACAAAATCGAAAGGATAACGAATGCCCGTCTCAAAAGCCA  
GCCTCGGAGAAGCCTTGCAACACCAGAGCATGTCACGATATGGATGCAGGTTCCCTGC  
CCATAATTACAGTCAAAATACAACATATAACCAGACAGACATGAACGCGAAGGTAGAT  
TTAAAGATCGGCGGTATTGCGAAGATTTTTCAAGGCACGTCTCTATAAAAATTCGTTG



CCCCGTGAGGAAATTTGACAAAGCACAGATCACGTGGACCAAAGATAATAAAGAATTA  
AGGAAATCGAGGAAATATAAAATTAGCAGGAAGGGGGCGTTAAAGATAAACGACATAA  
CATCCTCGGATGCTGGTGTTCACGCGTGTATAGCCGGAAATTCTCATGCGGAGACACAA  
TTGATAGTGAAATTTTCGTTCAAAGGAACAGATAAGTAGCGAGGAGTATTTACGATTAAG  
CAATTCCGTCCATCGACAACGAAATGCAAATTTGGACTCGGCGCCTGCTAATTCAGGC  
GAAAGTCTCTACACTGATCCAGCAGTTGATTTTCTAATAGCCGCGTACGGAAACCGTTT  
TGTTCCCATCGACAGCGAAGATTTAAGTCATGAACGAGCAGTCCCTAGTAATCCTACGA  
GAAAGCCACATCAGAAAAAACAGAAAACTAGCCCAACGCCGCCGGATTCTACGATGA  
TGCACAAAGAACACGTTGTAACATCGTTGAATCAG

>novel\_circ\_000175

ATTTTGCCAACCAACCCACTCGCTTGTACTCAGTATGCGGAAGGCGCCCGTGGTGTGCTGT  
CTCGGGTAAGTAACGAGGCGAGAGATAGACGAACGGTCTTACAACGGAAGAGGTTAG  
ATGGTGAAGAACTCGCGAGGAAAGGCGAGGAACAGAAAGAGAAAAAAATGCGGGG  
TTAGACGACAAGAGGAGAGAATGTGTAGAAAGGTGGAAGCGCGTCACAAGGAAGAG  
ATCCTGAGAGGAGTGCAGAGGAAGAAATGGAAGAGACGAAGGAAAATGTTTATGGCG  
ACAACAACAGCAACCGCAGCACGACAGCAGCTTGGTTGAACGGTGACAGTTTATAGT  
GCAACAACATCGCAAAATACTTCTCTGTTCTCGCAAAACGCGTCAACGATAACGTTTC  
ACCAGTAACTGTATAATGAAATTTTCTACACTTGGCTATGAATTGTTTTTCAGCTGCAATA  
AATAATTTTCTAATTTGAGCTAAATCTTCCATTATAATAATAATGGAAATAAGAAACGAG  
CTTTGTACGTACAATGTTACTTCAACGTTTTTTTCCAATATAATTTGTCAGCATTCTCGAC  
GCCGCGATGAAACGATGAGAAGAAACGACGAAATGTTTGAACAACAGACGCGCCTCG  
TCTATCCGGAAGTTTCAACCAGTTTCAACAGAGAGGGAATACCGATTGCATTGCGAAA  
GCCTTTATACGATGCTTTCTTTGCGAGGCAAATTCCTGTATCCCTTCCGTGAACCATT

>novel\_circ\_000176

GACCTAAAGAAGCGCGGTTCCCACACCTGTGACATGCAGGCCCTACAGCCACTTCCGG  
TCCCAACCACCACAACCACCAACACCGCGCCTGCCATGACTATTTCCGGTGGCCAGCC  
ACCGCTTCCGGTATCGGAGACCGCTTGAGTCGATCACCGAGACCAATCACGATCACCA  
TATCCATAGTTATTATGAACAAAAAAGAAAAAGAAAAGAAAAGAAACGAAAAAAAAA  
GAAAAAAGAAAAAAGAGAAAAAATAATAAACGTACCTTTAACAAAAAAAAAAAAA  
AACACCATCACCGTCCTCCTCTTCTACTCGATGAAAGAACAATGGCCGACCGGCCGGA  
AGAACG

>novel\_circ\_000177

GTACGGTGACATGGTTCCGAAAACGATCGCGGGAAAAATCGTGGGGGGTGTATGCTCT  
CTCAGCGGTGTCTTGTGATCGCTTTACCGGTGCCTGTTATCGTCAGTAATTTACGCCG  
AATATATCACCAGAATCAGCGGGCCGATAAGCGAAAGGCGCAGAGGAAAGCAAGATT  
GGCACGGATCAGGATCGCGAAAGCGTCGAGCGGGGCGGCCTTCGTGAGCAAAAAGA  
AGGCGGCCGAGGCACGTTTGGCCGCGCAGGAGAGCGGCCTTCAGCTGGACGACAATT  
ACAAGGAGGAGGATATCTTCGAGCTGCAGCATCACCATCTGCTTCGTTGTTTGGAGAA  
GACCACGGATCGCGAGTTCGTGGAGATGGAGGTGCCCTACAACGGTGCCCCGAAGAG  
GCCGGGCTCCCCCTCGCCCCTCACCTCTCCCGCGCACAGCACTGCCTCGAGGGGCGGC  
CTGCTGCACGCCTGCTGCGGCCGCTGCTACCCCCAACGTTACCAG

>novel\_circ\_000178

ATTTATCGAAGAACC GTTTCGCCGAATTGCCGGAAGAGGTGACGGAATTCCTGTTCCCTC  
GAAAAGCTTCATCTCTACCACAATGCCATAAGAATAATACCGGAAACTGTGGTGATGCT  
ACAGTCCCTCAACTACCTCGATCTTAGTCGCAACCAATTGACTTCTCTACCTCGGGAGA  
TATGCAGGCTACCGCTGCAAACCTTGTTGGTCGCTCACAACAGATTGGCATCTCTGCCG  
GACGAATTGGGCAGGATGTCGGCGTTGGCCGAGCTCGATGCGGGATGCAACGAAATC  
ACGAATCTGCCACCCCGCATGGGCGATCTTGCGCGACTTAGGTCCTTGGATCTGAGGA  
GCAATATGATCGTCCACCTGCCTATAG

>novel\_circ\_000179

ACCGTGATGCAGCCGGGTATCGGAGGTGGAGGTGGCGCGGCCACACAGGTGGGAC  
AGGTGACGACGAAGCTCCGAAAGATCCCGGTGTTCCGATCACTCATCAACCTTTCACC  
GAGAAAGACTACGAAGGTCACAGAGCGCACACGGTGTATGTGGGCGTGCATCTACCA  
GGCGAAAGGAGACATCGTCGTCATCACAAGCACCATCATTCTCAACGTCAAACGTACA  
GTGCCGATAAGGATAATGTGACAACGATAGGCCCA

>novel\_circ\_000184

GGAAAAAGAAGAAGAAAAAACTATTAAAGAGAAATATACAGAAGATGAAGAATTA  
AACAAAACAAAACCTATCTGGACTAGAAATTCTGATGATATTACACAAGAAGAATATGG  
TGAATTTTATAAATCATTGACAAATGATTGGGAAGATCATTTGGCTGTAAACATTTTTTC  
TGTAAGAAGGTCAATTAGAATTCAGAGCTTTACTTTTTATTCCAAAACGTATGCCATTTGA  
TTTATT

>novel\_circ\_000186

GTAAAACATTCTGCCAGTCTTGTAAGAAGAAGTGCAGCGGGGAGGTACTACGAGTGC  
AGGACAAGTATTTCCACATAGGGTGTTTCAAGTGTGCTCAATGTAACGCGAGCTTAGC  
GCAGGGTGTTTTTTTCGCGCGCGAGGGCTCTTACTATTGCACCAAGGATTACAGGGAA  
CGGTGGGGAACGAAGTGCGCAGGTTGTGGAGAATACGTGGAAGGCGACGTGGTCACT  
GCCGGAGACAAGCATGCCTTCCATCCCACTGTTTCCACTGCCAACGATGCAGACAAC  
CGTTACTCGGACAGGGAACCAAGGTTCCCTCGTCCAAGGTCAAGCTCTTTGCCACCG  
ATGCGTCGGTATCCCTGTGCGAGAGGCCTCGACGCCAATCGGGAATAGCTCCGCCACC  
AGAGGATCCGGAGATGGGCCCTCCGACCCCGGTGCCTGCGCTGGTTGCGGAAACCAA  
TTACGAGAAGGTCAGGCTTTGGTAGCTCTCGATCGACAGTGGCACGTATGGTGTTTAA  
AATGTCACAGCTGTGACACCGTCCTTCATGGAGAGTATATGGGAAAAGACGGGGTGCC  
TTATTGCGAGAAGGATTACCAGAAGTTGTTCCGGCGTGAAATGCGCCTATTGCAATCGTT  
ACATCAGCGGAAAGGTGCTGCAGGCAGGTGACAATCATCATTTTACCCGACTTGTGC  
CCGTTGCACCAAGTGTGGCGATCCTTTCCGGCGATGGAGAGGAGATGTACTTGACGGGC  
GCTGCCATTTGGCATCCCCGCTGTGGCCCGGGCCCTAGCGGACCCAATGGTATCGTGA  
ACGGCCACGGAGAAGCTCACACGCCACAGCATCGAGAATCGGAACGGATTTCCAGCA  
GCGCATCGGAGATGCAG

>novel\_circ\_000187

TTTTCATTGCGGTACGCGACGCCAAGCCTGAACGGATCACTCTGCAGCCCTTACAGCA

GCCTCAGTCGCAAGTATTATCCCGCGCGAACTGGAAGTCCCGGATTGATATTGCGAGAA  
TACGGACGTGGTCCATCCGAAGATGTGTCTAGGATTTACACTTACTCGTATTTGACCGA  
AACGCCGACCCAAGGATACTTGAGACGTCCGATACAGCCGTACGACAAACCTCCGACT  
AGCCCACACTTTTCATAGACCTAGCTCGTCACGTTTCGATAAGAAGCAGCGGCGGACGCA  
GCAGCCGATCTGGAATGCGTGCTCTGGTCGATGCTCTCAGCGAGACCAGACCAAAGTC  
ACCGGCCAGTCAAGTAGATAATGACGAGCCAATAGAGCTGGCGCATTATCCGGACGCC  
ATGAAACCTCCTCCTGGAACCAAACCGCCGATCGAGAGAGATGATTTTCCCGCTCCAC  
CTTATCCTTATACAGATCCTGAAAGACGTAGACGATGGTCCGACACTTATAAGGGAGTA  
CCTGCATCCGACGACGAGGACGAAGTGGATAACAAAACCTTATATAAAGGAGGTGGAG  
GAGAAGTTGAAGAAGGAACAGGACGAGCTAAGCAAAATCGATACTGGAATAGCGAAA  
GTGTTTTTTGCAAGATCGTGAAAAGGATCGAGAGAATTTGAGACACAGAGCCGCGAAC  
GTTGATCCTAGAAATGCGTCGAGAACGCCATCAGCTGCCAGAGAACCGACTTATAGAC  
TGCGATACGAGAGTCCAGTTGGCGCTTCGCCTTCGAGGAACATAGATCACGCCAGACC  
GTGGGAGGACGATGATGGTTTTAGTTATAGATCTAGCGTAGGACCTAGTTACAACG

>novel\_circ\_000188

TATTATCCCGCGCGAACTGGAAGTCCCGGATTGATATTGCGAGAATACGGACGTGGTCC  
ATCCGAAGATGTGTCTAGGATTTACACTTACTCGTATTTGACCGAAACGCCGACCCAAG  
GATACTTGAGACGTCCGATACAGCCGTACGACAAACCTCCGACTAGCCCACACTTTTCAT  
AGACCTAGCTCGTCACGTTTCGATAAGAAGCAGCGGCGGACGCGAGCAGCCGATCTGGA  
ATGCGTGCTCTGGTCGATGCTCTCAGCGAGACCAGACCAAAGTCACCGGCCAGTCAA  
GTAGATAATGACGAGCCAATAGAGCTGGCGCATTATCCGGACGCCATGAAACCTCCTCC  
TGGAACCAAACCGCCGATCGAGAGAGATGATTTTCCCGCTCCACCTTATCCTTATACAG  
ATCCTGAAAGACGTAGACGATGGTCCGACACTTATAAGGGAGTACCTGCATCCGACGA  
CGAGGACGAAGTGGATAACAAAACCTTATATAAAGGAGGTGGAGGAGAAGTTGAAGAA  
GGAACAGGACGAGCTAAGCAAAATCGATACTGGAATAGCGAAAGTGTTTTTTGCAAGAT  
CGTGAAAAGGATCGAGAGAATTTGAGACACAGAGCCGCGAACGTTGATCCTAGAAAT  
GCGTCGAGAACGCCATCAGCTGCCAGAGAACCGACTTATAGACTGCGATACGAGAGTC  
CAGTTGGCGCTTCGCCTTCGAGGAACATAGATCACGCCAGACCGTGGGAGGACGATGA  
TGTTTTAGTTATAGATCTAGCGTAGGACCTAGTTACAACG

>novel\_circ\_000189

GGTGATTATTCGTTTCAAGTGGGATGGGAGACAAGACGCACAGCACTGATTTCTCATCTG  
GCAAATCAGATATATCGACAGGAAGCATCACGGATGTGGATCGACGGGCATTGGTATGT  
ACCACAGCCCCATACTACTCCCGGCGAATTAGCATG

>novel\_circ\_000190

AATGATGGTGGAATGCTGCCATCATCTACCACGTATACAGGTGGCCTAGGTTTCGGTAGT  
TGGAAGTCACGGGGGCCATCACGTGAGGAGATCACTGCCAGACATGGGGACAGCACC  
GTCCGAACCGCCGAAACTCTATCCTTATCATTTACTTGTCATCACAACTACAGGCTGC  
CCGCTGACGTGGATCGTTGCAACCTCGAAAGACATCTTTCCGACGCGGAGTTTGAGGC  
AGTACTTCAGTGTACTCGTGCCGAGTTCTACAGATTGCCGCAATGGCGTCGTAACGAAA  
TCAAAAGACGTGCCCCGGCTGTTTTAACTGGCAGCTATCACGCTACGTGTTCTACTTATT  
ACCTTCATCGTGTACGACTGTGTTACCCTGCTATAGAGTGTACATTCTTCGGCGTG

>novel\_circ\_000191

CAAACCTTTGTTGCGTGTGAGCCGGTGCTATGTTAGGATGGACCAGTTCCCGTGATACCT  
CTTTTAAAGGACGAAGAAGCTGTCAATAATGGGTACAATCCTCTGGGTAGGATAATCGA  
CAACGAGGAAGATTCATGGATTTCTCGTTGGTTTCCATAGGAGCGATAATAGGAAGTT  
TCGTGGCTGGATATTTGGCTGAAAGATATGGTAGAAAGATGACACTGCTGTCAGCCGTA  
GTACCTTTCTGATCGGTTGGGTTTTAATCGCAACAGCCAAAGTCGTGATCCAATTGTG  
CGTGGCCCCGAGTGATCCTCGGTTTCGCCTTAGCGTTTCGCCTTCACGGTCGTTCCCATGT  
ATTGCGGTGAAATCGCCGAGATATCCGTGAGAGGGGCTCTGGGATCTTTCCTGCAGTTG  
TTCGTCAACCATCGGTCTCTTGTATTCTGATTCTATCGGCCCCCTACGTGTCTTATCTGGTAT  
TCTGCATAGTCTGCGCCATTGTACCTGTCGTGTTTCGTGCGGCTGTTTCATCATGATGCCCG  
AATCGCCGTATCAATTGCTCAAGATCGGCAAAAAACAAGAGGCGCTCGAGTCTTTGGC  
TAAATTGCGAAGCAAGACCATCGCCAGCGTGCAAAAGGAAGCAGATGAAATGCAGGC  
TTCCATCGACGAGGCGTTCAAAAACGAGGCGAAATTGTCGGATTTATGGAAAGTGAAA  
GCAAATTTGAAAGCTTTGGTGTTTACGTGTGTTCTCGTCGCCTTCCAACAAGCCAGTG  
GTATCAACGTGGTCTCTTTAATATGGGAATCTTTCACAGCTGCAAAATCATCGTTAA  
ATAGCTCGGTGGCAACTATAATCGTCGGTACAGTTCAAGTAATTACTTCCGGAATCACG  
CCATTGGTCGTGACAGACTTGGCAGAAAAATACTGCTTATTTTCTCCGGCGTTGGCGA  
GATCGTCTCCCTG

>novel\_circ\_000192

CAAACCTTTGTTGCGTGTGAGCCGGTGCTATGTTAGGATGGACCAGTTCCCGTGATACCT  
CTTTTAAAGGACGAAGAAGCTGTCAATAATGGGTACAATCCTCTGGGTAGGATAATCGA  
CAACGAGGAAGATTCATGGATTTCTCGTTGGTTTCCATAGGAGCGATAATAGGAAGTT  
TCGTGGCTGGATATTTGGCTGAAAGATATGGTAGAAAGATGACACTGCTGTCAGCCGTA  
GTACCTTTCTGATCGGTTGGGTTTTAATCGCAACAGCCAAAGTCGTGATCCAATTGTG  
CGTGGCCCCGAGTGATCCTCGGTTTCGCCTTAGCGTTTCGCCTTCACGGTCGTTCCCATGT  
ATTGCGGTGAAATCGCCGAGATATCCGTGAGAGGGGCTCTGGGATCTTTCCTGCAGTTG  
TTCGTCAACCATCGGTCTCTTGTATTCTGATTCTATCGGCCCCCTACGTGTCTTATCTGGTAT  
TCTGCATAGTCTGCGCCATTGTACCTGTCGTGTTTCGTGCGGCTGTTTCATCATGATGCCCG  
AATCGCCGTATCAATTGCTCAAGATCGGCAAAAAACAAGAGGCGCTCGAGTCTTTGGC  
TAAATTGCGAAGCAAGACCATCGCCAGCGTGCAAAAGGAAGCAGATGAAATGCAG

>novel\_circ\_000193

GAAGAAATTGAAATAGATGAAGATGAAGATGAAAGTAATATAGAAGATGAGGAAGATG  
ATGATGAAGATGAGGAAGATGAGGAAGATGAGGAAGAGGATGAGGATAATGATGAGG  
ATGATGAAGATGATGATGATGATGATGATGATGATGATGATGATGATGATGATGATGATG  
ATGATGATGATGATGATGACGACGATGACGATAATAATGATATAGAAGAAAAAGATAAA  
AAAAATGAGAATAATAAGCAACATGAAGATAATAAAATTAAAAAAAGTATACAAGATTT  
A

>novel\_circ\_000194

AAGATTCAGCTTCAATTTCTTGTTTAAAGACGTTTAAACATTTTCTCATTTTTTAAAGAAT  
CTGTAGCTTTTCTCTTAGATTGTTTGTCAAGTAATTGTGGTACCTGCTCATCTTCATCTTC

TTCTTCTATTTTCATCTAAATCCAAATCCTCATCGG

>novel\_circ\_000195

ATACTCCATCGTTCGCGATAACGCGTTTACCTGGTTTTGGAATCCCGATCGTCGAGGGG  
ATGTCCGTCAGCTTGAAATGCGAGGTGGACAGCAATCCGGCCAGCACGCCCATTGCGC  
AGCGTGACAATGGACCGCCCGTCGAGCAGAGCGACGACGGATGGCTCAACTTCACAA  
AAATCAGCCGCGCCGAGAGCGGCTGGTACAAATGTTACACCAGGCACATGCTCGGCAT  
ATTACACAGCATCGGTTATTTTCTCAACGTGCGCTACGATCCAGACATGGAAACGGAAG  
CGGAAGCGTTGAACGGCGAGGCAACCGATTCCCGGAAGATGGAAGTTCAAATCGGGG  
GTGCGGTGACCTGGAGTGCGACGGTGGTTGTTGGGGACACGGTCCTGGAATGGATC  
CAGTTGGTGGTCCCGGTCCACTGGCTTTGAGTCGAGTCGTTTACCAGGAAGCCGGCGA  
ATATCGATGCGTCGCGCCCGACAGGAAAATGCAAGACACCTGGCGCGCCCAATTGCCG  
TATCACATCAAGATCACCG

>novel\_circ\_000196

AGGCACCCCGTGGGACGTACCTGCTGATAGATGGCCGTCGACTGGACCCCGGCAACCA  
GTCGTCCTGTGAAGGAGGGGTCCGAATTGACGTTGGAGTGCGCCCGCGAGGGTGG  
GAACCCGCCACCCGATTTGGCATGGGGGATGACTCTGTCTCAGGCCACTTTGGACGGT  
CCCGAGCAACCGCCGGACAATCTGACCGTGTTGCCCTCGACATCCGGTAGACGCAGCG  
GGGCACACCTCAAGGTTCTCAGGGGTCAACACAACGCGACCATCGCCTGCGTCGCCC  
GCCACATTACCCTCACCATACCCATGAACGCGAGCATTCTGTTGGACGTGCAATATACT  
CCATCGTTCGCGATAACGCGTTTACCTGGTTTTTGAATCCCGATCGTCGAGGGGATGTC  
CGTCAGCTTGAAATGCGAGGTGGACAGCAATCCGGCCAGCACGCCCATTGCGCAGCGT  
GACAATGGACCGCCCGTCGAGCAGAGCGACGACGGATGGCTCAACTTCACAAAAATC  
AGCCGCGCCGAGAGCGGCTGGTACAAATGTTACACCAGGCACATGCTCGGCATATTCA  
CCAGCATCGGTTATTTTCTCAACGTGCGCTACGATCCAGACATGGAAACGGAAGCGGA  
AGCGTTGAACGGCGAGGCAACCGATTCCCGGAAGATGGAAGTTCAAATCGGGGGTGC  
GGTGACCCTGGAGTGCGACGGTGGTTGTTGGGGACACGGTCCTGGAATGGATCCAGTT  
GGTGGTCCCGGTCCACTGGCTTTGAGTCGAGTCGTTTACCAGGAAGCCGGCGAATATC  
GATGCGTCGCGCCCGACAGGAAAATGCAAGACACCTGGCGCGCCCAATTGCCGTATCA  
CATCAAGATCACCG

>novel\_circ\_000197

GCTCGGTGAACGAGGCCGGTGTTTTACCCCTTCGTAGCAGGCAGGAGGGTGGACGGC  
GTGCTAGAAGAACCACGACGAGCACCACCAGCACAAACGGCGTCCAGCTCGACGTTGA  
TTTCTCTGTGCGACGAGGTGGCGCAGCCCGCGGCCCTTTAGCCCCGAAGAGGACTT  
ATGGTCTACCAGTTCTTCCGCTACAACCAATGTTCCAGTCACCTTAGATACAGCTGCCG  
CTTCGTCAAAGCCACCCTCGGAAATGGTGGTGAAACCTCACAGCAAGGTCATACTACC  
GTGCGACCTGGAGGAAAATTACTCGAGGCTGCTGTTGCCCCGGGGTCAGGAGCTACAG  
AATACGGCCAGCGACATGGTTGCACGAGGGAAGTCCTGTAGATATGATTACGATCAAC  
ACGAAGACGGAGATGAGCGGGACCGGACATAGATATATCGGCGACTCCATGACTGACG  
CGTTGCACATAGACAACGTGAGATTAGAGGACGACGGTATATGGGGTTGCAGGCTCGA  
GGACGATCAAGGGAAGATACTTTCCGGCAGGCCTGTGAAACTCGTCGTCCTCGAGGCA  
CCCCGTGGGACGTACCTGCTGATAGATGGCCGTCGACTGGACCCCGGCAACCAAGTTCCG

TCCCTGTGAAGGAGGGGTCCGAATTGACGTTGGAGTGCGCCGCCGAGGGTGGGAACC  
CGCCACCCGATTTGGCATGGGGGATGACTCTGTCTCAGGCCACTTTGGACGGTCCCGA  
GCAACCGCCGGACAATCTGACCGTGTTGCCCTCGACATCCGGTAGACGCAGCGGGGC  
ACACCTCAAGGTTCTCAGGGGTCAACACAACGCGACCATCGCCTGCGTCGCCCCGCCAC  
ATTACCCTCACCATACCCATGAACGCGAGCATTCTGTTGGACGTGCAATATACTCCATCG  
TTCGCGATAACGCGTTTACCTGGTTTTTGAATCCCGATCGTCGAGGGGATGTCCGTCAG  
CTTGAAATGCGAGGTGGACAGCAATCCGGCCAGCACGCCCATTGCGCAGCGTGACAAT  
GGACCGCCCGTCGAGCAGAGCGACGACGGATGGCTCAACTTCACAAAAATCAGCCGC  
GCCGAGAGCGGCTGGTACAAATGTTACACCAGGCACATGCTCGGCATATTCACCAGCA  
TCGGTTATTTTCTCAACGTGCGCTACGATCCAGACATGGAAACGGAAGCGGAAGCGTT  
GAACGGCGAGGCAACCGATTCCCGGAAGATGGAAGTTCAAATCGGGGGTGCGGTGAC  
CCTGGAGTGCGACGGTGGTTGTTGGGGACACGGTCCTGGAATGGATCCAGTTGGTGGT  
CCCGGTCCACTGGCTTTGAGTCGAGTCGTTTACCAGGAAGCCGGCGAATATCGATGCG  
TCGCGCCCGACAGGAAAATGCAAGACACCTGGCGCGCCCAATTGCCGTATCACATCAA  
GATCACCG

>novel\_circ\_000198

GCTCGGTGAACGAGGCCGGTGTTTTACCCCTTCGTAGCAGGCAGGAGGGTGGACGGC  
GTGCTAGAAGAACCACGACGAGCACCACCAGCACAAACGGCGTCCAGCTCGACGTTGA  
TTTCTCTGTGCGACGAGGTGGCGCAGCCCGCGGCCCTTTAGCCCCCGAAGAGGACTT  
ATGGTCTACCAGTTCTTCCGCTACAACCAATGTTCCAGTCACCTTAGATACAGCTGCCG  
CTTCGTCAAAGCCACCCTCGGAAATGGTGGTGAAACCTCACAGCAAGGTCATACTACC  
GTGCGACCTGGAGGAAAATTACTCGAGGCTGCTGTTGCCCCGGGGTCAGGAGCTACAG  
AATACGGCCAGCGACATGGTTGCACGAGGGAAGTCCTGTAGATATGATTACGATCAAC  
ACGAAGACGGAGATGAGCGGGACCGGACATAGATATATCGGCGACTCCATGACTGACG  
CGTTGCACATAGACAACGTGAGATTAGAGGACGACGGTATATGGGGTTGCAGGCTCGA  
GGACGATCAAGGGAAGATACTTTCCGGCAGGCCTGTGAAACTCGTCGTCCTCGAGGCA  
CCCCGTGGGACGTACCTGCTGATAGATGGCCGTCGACTGGACCCCGGCAACCAGTTTCG  
TCCCTGTGAAGGAGGGGTCCGAATTGACGTTGGAGTGCGCCGCCGAGGGTGGGAACC  
CGCCACCCGATTTGGCATGGGGGATGACTCTGTCTCAGGCCACTTTGGACGGTCCCGA  
GCAACCGCCGGACAATCTGACCGTGTTGCCCTCGACATCCGGTAGACGCAGCGGGGC  
ACACCTCAAGGTTCTCAGGGGTCAACACAACGCGACCATCGCCTGCGTCGCCCCGCCAC  
ATTACCCTCACCATACCCATGAACGCGAGCATTCTGTTGGACGTGCAATATACTCCATCG  
TTCGCGATAACGCGTTTACCTGGTTTTTGAATCCCGATCGTCGAGGGGATGTCCGTCAG  
CTTGAAATGCGAGGTGGACAGCAATCCGGCCAGCACGCCCATTGCGCAGCGTG

>novel\_circ\_000199

AGGCACCCCGTGGGACGTACCTGCTGATAGATGGCCGTCGACTGGACCCCGGCAACCA  
GTTTCGTCCCTGTGAAGGAGGGGTCCGAATTGACGTTGGAGTGCGCCGCCGAGGGTGG  
GAACCCGCCACCCGATTTGGCATGGGGGATGACTCTGTCTCAGGCCACTTTGGACGGT  
CCCGAGCAACCGCCGGACAATCTGACCGTGTTGCCCTCGACATCCGGTAGACGCAGCG  
GGGCACACCTCAAGGTTCTCAGGGGTCAACACAACGCGACCATCGCCTGCGTCGCCC  
GCCACATTACCCTCACCATACCCATGAACGCGAGCATTCTGTTGGACGTGCAAT

>novel\_circ\_000200

GCTCGGTGAACGAGGCCGGTGTTTTACCCCTTCGTAGCAGGCAGGAGGGTGGACGGC  
GTGCTAGAAGAACCACGACGAGCACCACCAGCACAAACGGCGTCCAGCTCGACGTTGA  
TTTCTCTGTTCGACGAGGTGGCGCAGCCCGCGGCCCTTTTAGCCCCCGAAGAGGACTT  
ATGGTCTACCAGTTCTTCCGCTACAACCAATGTTCCAGTCACCTTAGATACAGCTGCCG  
CTTCGTCAAAGCCACCCTCGGAAATGGTGGTGAAACCTCACAGCAAGGTCATACTACC  
GTGCGACCTGGAGGAAAATTACTCGAGGCTGCTGTTGCCCCGGGGTCAGGAGCTACAG  
AATACGGCCAGCGACATGGTTGCACGAGGGAAGTCCTGTAGATATGATTACGATCAAC  
ACGAAGACGGAGATGAGCGGGACCGGACATAGATATATCGGCGACTCCATGACTGACG  
CGTTGCACATAGACAACGTGAGATTAGAGGACGACGGTATATGGGGTTGCAGGCTCGA  
GGACGATCAAGGGAAGATACTTTCCGGCAGGCCTGTGAAACTCGTCGTCCTCGAGGCA  
CCCCGTGGGACGTACCTGCTGATAGATGGCCGTCGACTGGACCCCGGCAACCAGTTTCG  
TCCCTGTGAAGGAGGGGTCCGAATTGACGTTGGAGTGCGCCGCCGAGGGTGGGAACC  
CGCCACCCGATTTGGCATGGGGGATGACTCTGTCTCAGGCCACTTTGGACGGTCCCGA  
GCAACCGCCGGACAATCTGACCGTGTTGCCCTCGACATCCGGTAGACGCAGCGGGGC  
ACACCTCAAGGTTCTCAGGGGTCACCACAACGCGACCATCGCCTGCGTCGCCCCGCCAC  
ATTACCCTCACCATACCCATGAACGCGAGCATTCTGTTGGACGTGCAAT

>novel\_circ\_000201

GCTCGGTGAACGAGGCCGGTGTTTTACCCCTTCGTAGCAGGCAGGAGGGTGGACGGC  
GTGCTAGAAGAACCACGACGAGCACCACCAGCACAAACGGCGTCCAGCTCGACGTTGA  
TTTCTCTGTTCGACGAGGTGGCGCAGCCCGCGGCCCTTTTAGCCCCCGAAGAGGACTT  
ATGGTCTACCAGTTCTTCCGCTACAACCAATGTTCCAGTCACCTTAGATACAGCTGCCG  
CTTCGTCAAAGCCACCCTCGGAAATGGTGGTGAAACCTCACAGCAAGGTCATACTACC  
GTGCGACCTGGAGGAAAATTACTCGAGGCTGCTGTTGCCCCGGGGTCAGGAGCTACAG  
AATACGGCCAGCGACATGGTTGCACGAGGGAAGTCCTGTAGATATGATTACGATCAAC  
ACGAAGACGGAGATGAGCGGGACCGGACATAGATATATCGGCGACTCCATGACTGACG  
CGTTGCACATAGACAACGTGAGATTAGAGGACGACGGTATATGGGGTTGCAGGCTCGA  
GGACGATCAAGGGAAGATACTTTCCGGCAGGCCTGTGAAACTCGTCGTCCTCG

>novel\_circ\_000202

GGTTGCGACAACGGTCCGGTCCTACCGACACGCCAAGAAGCGGAGGCTCGGTGAACG  
AGGCCGGTGTTTTACCCCTTCGTAGCAGGCAGGAGGGTGGACGGCGTGCTAGAAGAA  
CCACGACGAGCACCACCAGCACAAACGGCGTCCAGCTCGACGTTGATTTCTCTGTCGGA  
CGAGGTGGCGCAGCCCGCGGCCCTTTTAGCCCCCGAAGAGGACTTATGGTCTACCAGT  
TCTTCCGCTACAACCAATGTTCCAGTCACCTTAGATACAGCTGCCGCTTCGTCAAAGCC  
ACCCTCGGAAATGGTGGTGAAACCTCACAGCAAGGTCATACTACCGTGCGACCTGGAG  
GAAAATTACTCGAGGCTGCTGTTGCCCCGGGGTCAGGAGCTACAGAATACGGCCAGCGA  
CATGGTTGCACGAGGGAAGTCCTGTAGATATGATTACGATCAACACGAAGACGGAGAT  
GAGCGGGACCGGACATAGATATATCGGCGACTCCATGACTGACGCGTTGCACATAGAC  
AACGTGAGATTAGAGGACGACGGTATATGGGGTTGCAGGCTCGAGGACGATCAAGGG  
AAGATACTTTCCGGCAGGCCTGTGAAACTCGTCGTCCTCG

>novel\_circ\_000203

TTACGAAGCTGAGGGAGCACTGGGACGAGATGAACTCGAAAATGATGCAGAGGAAGA  
CGGAGTTGGACGCGATGCTCGGGGACAGCCAGCGATACGAGGCGAAAAGGAACGAG  
GTGGAGGTCTGGTTGGCGCGAATGGAACTCGGCTGGAGAAAATGCGGGCCGTCGGC  
CACACCGCCGACGTTCTCGAGGCCAGCTCCGGGAACAAAAGTCGTTCCACGCCGAG  
CTCCACCAGTACAAGCATCAGATCGAGCAGTTCAATCAGCTCACGCAGAAGCTGATCG  
CCGTTTATCAGGAGGACGACACGACCCGCGTGAAAAAGATGACCGAGACCATCAATC  
AGAGATACAACAACCTCAACACAAGCATCATCAATCGAGGAAAACTGCTTCACTCCGC  
GATGAACTCCCTCCACAACCTTCGACCGGTCCCTGGACAAGTTCTTGCTTGTTGAGC  
GAAGCTGAGTCCTCGATGGAGGGATTGGAAGCGGAGGCCGATCGGCTAGGCGGGCGA  
CGAGACCAGGGTGCGCTCAGACGACCGCAACATCAGCTTAAG

>novel\_circ\_000204

GACGATCATCGCGGGTTCAGGAGGCAGCTCGAGGACAAACGACCGATCGTCGAGAAC  
AATTTGCTGAGCGGACGGCAGTACATCGCCAACGAGCCGCCCTCTCTGACACGTCGG  
ATTCCGAAGCCGGAAGAGAATTGGATGGCGATTTCGAGGGGCTACAGGAGCGCGGAGG  
AGCAGGCACGCGAATTGACGCGCAGCATTCGCCGGGAAGTGAACAACTTTCAGAGC  
AGTGGAACGCCCTAATCGAACGTAGCGATGCGTGGAAGCGGAACTCGACGACACCG  
CTAAC

>novel\_circ\_000205

GATCGAGCGCGCACAAAAACGACGCGACAGGAAATGGAAGGCCGGCTCCCCTTTTGG  
CGGAACCCAGATACGGCGCCGCGCCACAGCCATACGGATCCACGCCACAGGTAAC TTT  
CCCACCTGGTGCCGGTCACGATCGTTACGAGGAGAATTTCAATGGACCAGCCACGTAT  
GCGGAGCCGTACGTGGAGCGTTACGGTATTAAGAGCGATTTTCAGCGGTGAGAACCAT  
TACATCCTACGCCACCTCGACCTGGTTACGTGCCACCTTGGGGCAGACGCCACCTTC  
GAGCACGCAGGGTTCCGTGATGATGGTCTACGGGCTGCAACCGGATAAAGTCAACACG  
GACAAACTGTTCAACTTGTTCTGCCTGTATGGAAATGTAACCAAGGTGAAGTTCTTGA  
AGACGAAAGAGGGCTGCGCAATGATCCAGATGGGCGACAGCATAGCCGTGGAACGTT  
GCCTACAGAATCTGAACAACGTGACGATCGGCACAGACGGAAGGTTGCAGCTCGGTT  
TCTCGAAGCAGGCTTTCCCTCTCGGACGTCACCAATCCCTACATTCTGCCGACAAGAC  
GGCGAGCTTCAAAGATTTACAGGAAGCAAGAATAACAGGTTCTAAATCCAGCGATG  
GCCAATAAAAATAGAATACAACCACCCTCAAAGATAGTCCACTTTTTTCAACACGCCCC  
GGA CTTAACCGAGGAGACCGTG CATCGCGTGTTCTGTGGAACGCGGTATCGAGGCGCC  
GACGACGGTAAAACTGTTCCCCCTTAAATCGGAACGATCGTCGTCCGGCCTCATCGAG  
TTCAGCAGCGTCGGAATCGCGGTAGCCGCCATCATGGAATGCAATCACACAGCATTGG  
AAAACAGCAATGGCAAATTCCCATACATAATGAACTGTGCTTCTCGTCGTCCCGCACC  
ATACCAACGAGTTTCCCGCCCAGCAGCGGCAGCACGTCGAGCAATTCCGCCGGTAATG  
GCCACGTCAAAATGCAGCAGGACTCGGAATAGAACGGCGAGGTCCAGGGCCAGCAGC  
GTCAGCGTCAGCGCCAGCGTCCCTCTCTCGCCCTGCACCCGTTGTGTGCCCCGACGGG  
CACGGCCCTGCACCCAGCCGACGATTACACTCTCCCCGGTCTTACCGCCGCCCCGTG  
CCGCCTCCCCTGCCGCCACCTGCGTTCTGATCGCCACTCCA ACTCTCTATCCTACCGT  
GCCACCGCCACCACCGCCTCCGTTGCCTACGTTCTGGCCGTACTGATGAGAAGAGCAG  
CGGGCCTACTCGCCGGACGAGGCAGCAAAAGACGGAAAAAGAAAAAGAAAAA  
ATATATATATATATATACATATATACATATACATGTATGTATACACATATGTGTGCATATATGT



```
>novel_circ_000206
```

```
>novel_circ_000207
```

ATGCAGCCCTACTCGTGTGTTCACTTGACGGGTGATGATGGATTACAGTGGAAACCGAGTCA  
GGGCCCCGGTGAGAATGTGGGGCTTAGGCAGGTCTACGGCTCTTACACCCTCTCCCCCT  
ACTACTGTCTGCGAAGAGTGAGAGTGATAGTCATCGGTCTCTGTGAGAACGCGGACAT  
CAAATCGTCCGTTCTATCTAGAGTTCGGAGAGGAACGGGGTGATCGAGAGAACACAG  
AACGCGGGGTTGATCACGGTAAGTCAGTTCATAAAACAAGTGTCTGTTTCATAAAACCA  
GTTTCTACCAGAACAGTTTTTTTTTTCTTTCTCTTATACCTTTCTCTCTTTCTCTTTCTCT  
CTCTCTATATATATATATATATGTATATATGTACGTATATACGTATATATATATATATTTATTTCT  
CTCTTCTCTTTTCGAATTCTAACTGTCCACCACCATCCATCCTGTGCCCCGCGAGAACGG  
GAGACTTAAATTTCCCGGATATAAATACCAGTTTGAAAAATCCTTTCCTCCGTTTTACC  
CGAGCGAATCTTGTTGCGCTTCGACGAAAGGTGGAGTCGATTTGTGCTCTCTGATCC  
GAGAGTGGCCGACCACCGAGTGAATACCGATTGCGGAATACCGCAGACACGGGAAAG  
CAGTTCGGGATTTATCGGGGTTTTTTTAAGTTGAGAATCGTGGAGAAGAAAGGTGGTC  
GAGTCCCCACCGCACAAAGGATTAAACGGAAGAAGTTATCGCGATTTAATAGATTTTTTT  
TCAAGATTCGATATTTCTTTTTTTTTCTTTCTTTTCTTTCTTTTCAAACCGATTGCAAA  
AGAATTAACCAGTAGCAAGAAATGCTACACGCTACCCACTCTTTTTCAACGACGCGAA  
CAATAGCTCAAGTGGGAAAGCAATGGTGAGTTGGAAGAGTTACGGAATCGTGGAACG  
TGACGTTTTCGAACAAGGATTTTTTCGCGATCGATAATAACCAGCAGTGAAAACCGGGGA  
GGAAGGAAGAGAAAAAGTCCTTCTGTGTTGCATATACACCCCTATATCGTGCTCGATAAG  
CATCGCTGGAAC TGATCACCGTTTTTTTTTTTTTTTTTTTTTTTTTTTACCCTCGGAAACAC  
GGTGATCGATGGCGCGTCAGTTTGTGTTGCAAGAGCGATGGCCGAAGCACGATTAAAAA  
CTCGGGATTAAGAAAGTTCGATCCTGTTGAGCTTTTTTAAAGGTCCCTGGGGAATTGC  
TATCTTTTTCTCTCTTGTGCTCTCCGATCCAACGACCGTGATATTGGTTCTCTTTTTTTT  
TTTTTTTTTTTTTTTGCTTTCGAACGTGACAAAATTTCTGTGTTTCAATTTAATTTGTT  
GATCGAGAGAGAAAAACGGAGAACGTCCGAGAGGAATGAATATCGTTGCGCGGTGAT  
GCTAACGCGATTGGAATGCCGGTGAACGTCCAATAATCAGTCAAAGCGTGAAGACCGT  
AAGTAGAAATGCTTGATAACAGGCGCAAAGAGAACGGATTGAGAAACGAATGTAGT  
TGTGCTACTACACGATATACGTATGAACGCGTTCCACGTATATATACGTGGTTATTAATTA  
ACGTGGCTACGTACGATTGGTCACATTGTGTAAAGGATTATACGAAACGAAGCAATAT

TGCATTTCTAATTGCTCGCCGTTTCATACGAAACACACGATAAACGATTACACCAGGGAAT  
CGTTTCCAGATTCTATAAATATCACTGACAATCATTAAAAGCGTATTTTTCTTTTTTTTTT  
TTTTCTTTCCCTCCTCTTTTTTCCATTCCCTCGAAATTTTATTGCGTAAAGTGAATTCG  
TACTCGTTTAATTATTGGAGGCGTGTGATTCATCAGAGCCGCGATAAACGAAGTTTC  
ATGCCTCGACCTTTCACCTTTCCTCGAACGCGTCCATACTGATATATTGCGATCGCATTTA  
TAAGCCCTTCTCGAACTGATTCTGGAAATGAATCATTGGAAATAAATTTCTCGTCCCT  
TTATTTTTTTTCTTTTTCTTATACAATTGCGCCTCGATAGTGGATACGTATTTTGCACCTG  
ATACTAGAGATAAATTATTATTATTATTCTCTTCATTTTCTCGAACGAGCCTCTGCGCTT  
CTTTATTTTTATTTTCGTTCAAATTTATCGTGTGCGACTCTTGTTAAAGAATCATCAACATC  
GAAAATCTCCAAGACACTTATCCTCCTCGTTATAATTCCAATATGACATCTGTGCGTCAA  
ATCACACTGTGATACTTCGTTATCTGAAAATTTTCGTCGAAAAAAAAAAGAATTAATAA  
TTAATATAAGAGATCCGATGGAAAACAAGCACGTTCCAATATTAGGTAATGCTTTATTCA  
TGTAACGTGGCATCATATGCGTTATAAAAATGTAAAATAAAATAGAAGTAACAATACAG  
AGGAGATTAAAATTAACATACACGTGTGCTCCATAAATTTGTTTTCCAATAATAAAAAA  
AGAAAAAAATAAACTCTTAACTCTTTAACCATCGAGAGAGAAAAATGCACGCGAA  
CATTTTATCTTTAGCTAAGATGCTCTTACTGTTCCCTTTGAATACCGTCGAAATTAAACATT  
CCCTCTGAAACATCACACTAGAATCAGAAATTCCGTTCCCCTTCGTTTGAACCTGTTGC  
TCCCCCTTTCTCTTAAACCGGCAACGGAAAACTTACCTGCACAACCACCTCGAAAAA  
TCCTCCACGGTGACGAGCCGCCGTTACTTTACGATTATCACTGGGAGGAGATTCTTTTCG  
AACGGCGGTTGAAACGTTAGATTCAACGTTGATAAACGTTGGCTTGCGGGGCAACAAT  
TACGAATGCATTAAATTCCAAGATGCGGCCAAGATGTGTTTAAGAAGCGACCCTAATTT  
TCGCCCCGTCACAACTCTGCAACACTTCCTCTGGAATGGAGGCGATAACTCATCCCC  
GCAAACCTGCGTAATCGCAACTTTTATCGCGCTTGTATTCGCAGCGTGGGACGTTCCCC  
GTGTTTATCCTAGAGGGAAAGAGGATGGTGGCCTAGGGGGTGATTTAAATTTCTTTTCGA  
GCTTAATTTTCATTCTCGTCTCTTCGTGATGATTTTTTCTCCCTTGAAAAAGGCTTT  
TTTAGAGGGTTGGGTTGTACAGAGGAGGAGGAGGAATCGATGTGACGATCACGGGTT  
GAATTTGTCTCTGTTGTGTGTCGATTTGTAAACGCATTTTTTCTCCTCCTGGAAAAATCACA  
TGAATTAGTTTCTCGAATAATATTAACATTTTTATCTCGCAAATAAGCGAAAGGTATTTT  
TAGAAAAATAAAAAATTCCGGTATAGAAGTGAGAAGTGGTAGATTGAATTGTAGATCTGG  
AGTATGTAGAGTGTGAATTTTAAAAATTCATTTTCCATTCTAAAAAATGTAATTCGTTT  
TGAAAAAAGAAAAATAATAATAAACGTGAATATATCTCTGACCTATCGCGATTAATC  
ATATACACGAGTCGTTCTCGTATATATATATACTCGTGTATGCAAATATAATAGTTTCG  
AAGCGAAATGAAATATTAATAATTTTATGGAGTCGCGTAATCTAGTTTTACGGTGAAAA  
TATACCGCGTAACCTATATTTCTTTTCGTGGTAAATAAATTGACATAATGGAACGGGGGAC  
AACGGGAGATATGGGATAATTTCCCGACTAAATGAAACATTCTCGTACATCTGGTGAA  
ACGGCGGCCATAATAACGGAAACAAGTAGATTTTCAGCAACATTATTAATCTTGCGCAAG  
GTGTTTTAGCCCCCTTAGGTGATGCGATTAATCCAACCGTGAAATTTATTGTCATTATCTT  
AATCCTTAAGCGTCAGCATTAATCAACTTCTGATATTCATCATAACTCTCTAATAATTCGA  
ATTCGAAGCTCGAGATTGCCAAGGCAAATCCAGCTTTCCCTTAACTAATTTCTCCCGAG  
ATAATGGGTATCCGTTTAAACAATTTCTCGACAAAACCAGATTTCTCATTTTGCAATTTTG  
CAATTTCTTCTCTGGAATAATGAAACGTAATTTTAAAAAATAATTTTCAGAGATGGAT  
ACTCGACGAGAACAAAATTATTCTCGTTTGAAATTGAGCTTATCAATGCTCATTCCAGT  
TCTCTGATAAAATTTCAAATATTCTTCAAGTATCTTCTATCAAAGATTATTATTACAAT  
GTTTGACATAAAAAGTCACGTCAGAAATATCGGAAGGGTTAAAAAACAATAAAGACT

CGACACTTTTACCTCCCTCTATGTTATACCTCGCAGATATCGACCAGGAATAACTAAC  
CAAAACCATCGTGACGCAATCAGGAACCGCATAACGCTCGATCACTCACGATCATCCA  
ATCCGTTTATAGCTTGCGTTCACGGTTTTGGGCGATGGGCTAACAGCCATCCATGTGGT  
CGGTGTTCTCCTCGACCGAGGTAATTTTATGGGGTGCGCGTTGCCAGTCAGCATTGTAG  
GTCGATACATAGGGGGCTCATAGTTGTTGTTGTTGGCCCGATGGAAACGCGTTTGAAGA  
GAGAGATTGCACTCGTGGTGCAGCCTCGAAAAGAAACAAAGGGATAACGACACGACG  
TTTCTGTCGTGACACGGCGCGGCCCTCGTTGCACGCAACTGGATCGTTTGTAAATTGTC  
GTTTCGGTGCAAAAAAAAAAAGGAAAAAAAAAAGGAGAAAAGGGGAAAAGAAGA  
AAAAAAGAGAGAAACGTTTTTATTACGCGTTGCCGTGGTTGTCCACTTCCAAGTACG  
AGTCGCGTTTTTATTCCCCGTCGTGATGATTGAAAATTTTGAAACTAGCGGAGTTTC  
GGGGTCACGAACTGTAACTTTAAAACTACCCTCGAGCGTTGAAAAAAAAAAGCACT  
CGTGTTTCAGTTTGTACGAGTTTTTCGAGAGAATCGGTCAGATGCACTTGAGAATGAGT  
TTTTTTTTTCTTTCTTTCTTTCTGTTTTATGTAAACTTGTTTGCCATCATATTTTCATCAA  
TGTAATTACAATTCCTGGATGTGATTGAATTGAATTTTTTTTCAACAGTTTCTAATGT  
GACTCTTCAATTTTTATTAGATACAGATTAATCTTTAAAAAAAAAAAAATTCCAAGGAAAT  
TCTCTAAAAGCTGGAATCGTTAGAGTCAATTTACCATGCAACCTCATTTTAATCAGTTAA  
AAAGAGCAATTGATTTTTTTTCTTTTTTCTTTTTTTTTTGGTCCAACGTTTCCCTCGTT  
TCCAACGTAAAGCTGTTTCATAGAGTAATACGCTCGTTATTCTGGCGCGTGTTAGAATTC  
GTCAACCTATCCATCGGTTCCAATACCTGATTATAATAGTCCTCGAAGAGAGGCTTGCGT  
AGGGCAATTTATAAAGTTACAAGCCACGTTATGAAGGGTAATGGATCGTTAGTCTCGTG  
GTGGATGGTCGAATCACGTCGCGGAACGTGTTGACGTTTACGCTGATGGATGCCATCTT  
CCAACTCCTCCTTCCGTCATAACGCTCCTCTTTCTGTCGGATCAACTATTAGAATAGATG  
GACGAAAATTGACAATTTGCAGCTGGATTAATAGAGATTTAATAATAGTTAAACCGGTT  
AAATTCGTACAATCGCATTAAATCCGCCGAATAATCCGTTTATTTAACGCGCATTTTCATTAC  
ACGAGAATAACACAATGACGCCTACGCAATGACGCGAGCACAAATCTTTGTTACGCGG  
GTTATTACCGTCCTTAACAGTTCCCCCTCCCGTTTTTCGTTACACATCGCTGGAAAAAA  
CGCGGAAAAAGACATAGGAGCGCGCGTTTCGAAAATCCAGCGCAACACGAATAGCTCG  
TGTTCCCAATTGAAAGTCGGGAAGTGCTCGTCGATCGAGGCGCAATAGAGGAACGTTT  
TTGTCCGTCGGACACGCGATATCCAAAATCGCAATCTCCCAAGGTCCTCCGCGAGACCT  
ACAAGTGCCAATATCGAGTTTCATGGACTTGTAAGGCTTCCATATGACCCGGATGTAT  
CCATCCCCGTATAGGAGCGAGCCCTAGCCTAAATTTTGCTTCGATGTTTCTCTCGTTATT  
AAAAATATCCCCCGCCCTCTCAGACAGCGTAGATTTGCGCGTCCCGAAATTTTACACC  
ATTTCTCCTTCTCCCATCGACGACACGCCGATGAAGAGAATTCACTTTAATGAAAAAAG  
TAATATCGGATTCTTCGACGGGGCGAGAAAAAAGAAGAAGAAGAAGAAGAAG  
AAGAAGAAGAAGTAGAAGAGGAGGAAAAAATAATTACATTCCCATCCTTTCCAAAG  
ATTTTCGATGGATATTCCAAGAATTTAACTGTCAATTACACCGTCCTGAATTATACAC  
CACAACCTACCCCTATCCTATCCCCTATCTATTATTCACGTATCAACGTGACCGTTTTGA  
AACTTTGCGCGACACTCTCGATCTTGGTAAAATTATCCATCAAACCGTCAGATCGCTC  
GTTCCGAACTTCATCGTATATATAACTTCACCCTACTTTCAATCTTCCATCCAGTTAACCA  
ACATGCAAACCGAGTTAACCACACACCCCTCCACGTCGTCCCCTAACGAACTTAA  
CTCTCGAAACTCGTAAATTATCCGAAACAGACTGATCTCTCCTTTCTTTTCTTTCTT  
TTTTTCTTTAACGAAATATCAAACGTGATTATTTATATGTGTTATACGAGAATAAGCGCG  
GCAACTTTCACAACAGACTGGCAAAAGTTATCCGTGTCTTTTCGCGGAAGATTGCAGC  
CGAAAGTTTCGCGTGCGGGGAGGAACGGAGATCGATACGGCCATCACGACACGTAGGA

GATTCTCTGGCCAACGGGTAATAGCATGTTTAAATCTAAGAGGAGGACGGATGGAACC  
GATTTTTGAAGGAGGAGTATCTCTCGTGTCTCTAACCTTTTACTTGGTCCAACCAAGCG  
GATAAGTATTCGCGAATCGAATCACGATCGACGAGCCATTGATCCATCGATCGTCCGGT  
TGATTTTGAATCATCGCGATCGTTGACCCTCCCCAAAATTTTCTTATTACACTCCCGTT  
TCCGGTTGTTGGGGAAAGGAAAGGAGCGGCCGCCTCTCGAATAGCTCGAGGCTCACG  
TCATTGCTACGATTATTTGCTCGGCAGGTAAGTGTTTGTTTTTACGAGTTTGATAATCGA  
ATCGTTCGGTTATGTAATTCCTCGGCCCCGTTATGTATCGCCACTTTATCCCAACGGAAGT  
TATCGGGAACGGAATTTATACGCCGCGAATTTATCGACCGTGCGACCGTGCTTCCCCGA  
GTTTCGCTTCGCGTTAAATAGTTAGAATTAAATCCTTGGCCGGTTGTCGAGAAGATACG  
ATTCCTTGAATTTAATCTAATTGACGTAATTGTAACGACGTACAAATTTTCCCTATTCTAT  
GCAAATACGCGAATTATAATAATTATAATAATGCGATGCATTGCTGAAATTGTAATT  
TAATTAATACATTTGTAAAGACGTTTAAAGGAAAACTTTAGATTAAAATTATCTCGGTCAT  
AGGTCGTATTTCTTTCTTCGCGTTAATTGAAAAATAATACATAATTCAAAATTTCGCGAG  
AAAAGTGCAACGTCGAAGGTGGCTTGCCTTCGTAATTTCTGCCACGTTTAAAAAAC  
GTTACGTTTCGCCGTTTATCGCCACCATACAGCGGTTGATTTCAGACGCTTGATTTTC  
CAGACGTATCTTTAGTAAAAGAGCGACGCGACGACTCAAGACAACACTCGGTTCGAGT  
GTTTTGATACGAATCTTCTTTTGTACTTACTCTCTACTTGTCTCATTCCCGAGACATTGT  
TCAAGAAAAGTATCTTTTATTCCAAGAAATTTTCAAGTTCTGATGATGCATCACCGCTA  
TCCTGCAAAAATATAGAACGAAACAATTATTTCTTCGAATCATCTTTAATTTTAGAGTCT  
GTATATTTCTCCCAATATATTTTTTTTACAAAAGGAAGATTTCTCTCTTTTCTCTTTT  
TCTCCTTCGAGAAAAAGAATTTATAAATCAAAAATTCAAAAATCAAGATGAATAAATCG  
TCGAGAAAAGAATCATCTTAAATCTCCAGAAATTTCAACGTTTCGATACTCGACAAA  
ACAAGCCGATTGACTTCTCAAGTAAACCTTGTCTCACGATCTCGTCACCTGCCCTCCAA  
TTTAATTTCAACATCCAAACGCAAACGTACAACGACGCGGTGACCGATACATTAATCAC  
AACGCGTTACGCGTCTCTTTCTCGCTTGGGTGAGGAAAAATCGTCGCAGGAAATCAT  
CAAGGTGGCGGCGGTTTAAACGACCGGAAATCCCTCCCCCTTCTCCGTCGAATGCGAACG  
AACGAAATAAACGGAATGGATCGTTCCGCGTATGGATCTATCCATTGGGATGAAGATGC  
ATCGTCGTTCTCGGCGGGCCGTGTGCACATTGGTGTGTGTGCGGCACGCGATATCGAATA  
TTCGAAATCAATATACAGGTTGCACGGAGGGGGGAGGAGAAGGGTGCATCCCTCGATG  
CAACGTGTGCGCGTGCACGCGCGACGTATATACAACTGTAATGCGGTTTAAATATAGACC  
AATTGTATATGCCGCTTGGTTTCGGCGAAGAGGCGGTGAGATTATATCTCGAGGCGACA  
GGCGACAACAACGAAGGAAAACAAGTGACGATGGGCCTGTCTCTGCGCGCGCAATTG  
TGATGGTAAATGAAGCGTGGCCGGAAGCGGGAGCGTTTTTTTCGAGAGGACGGATAA  
ACGGAATTGGGAATCGTTTCGTTAGATGGAATTTTTATGAATATTGTTATTAATTTTGGCC  
GCGAAATTGGAACGTTAATGTTTATATCGCGTGTATACCAAATTTGCCGTTTATTTTATC  
GGCTTGTTTCGAGCGATTGTGATTGCGGAAGAGAATATATTTGAGGAAATATATAGGAG  
AGGTATATATGGGAGAGAGGACGCTTTTGATTATTATTAAACGGTTTTTCTTTCTCTCT  
CTTCGAAAGAACGCTTTTTGATGAAACAGCGTAGGGGGGAGAGGTAAATTGATTAAGT  
CGATCGAAGCAATATTTTCGCGCTGAAATAAAAAAAAAAAAAAAAAATAAAACGTCCAAC  
CCATCGGAGGCGATATTTTCGCGTTAAATTGAGGATTCTTCGAAAAGCGAAGTTGATCA  
CGATTCATAATGATTTTACTTGCATATTTATAACGTTTTTACTTCTCTAAAAAAATATATA  
TTAAATTTCTTATTAATTCCCTCCTATTTATCACTTTGATTACGTCACCGGTATACGGT  
AGCTGGCAAGAATTAAGCAGCCCTCGTGGTAAAGGAAATTCAAACCCCTCCTCCCTC  
GAACTTTCCAACCACCTCGCTGCAACTCTTCGTCCACGGAGACCACCAAACACTCCCT

TTAAATCCTCGAGGACCAGGCCAGAGTTAGTTTGGAAATTTTTCGATCCTGACGTGGATC  
CTGACCTATCAAGAATCAGAGTTTCGTTCTGAACCCCTTTGCGGCCGTGTTTGTATCCCGG  
GAGACCGTCCCTCCCTCTCTCTCCCCCGTAACCTGCCGCGCTAAACTGGCCCCAACT  
GTCAAAATCTCGCGTGTCTCCCCGGAATATCCGGCTATATCTTTGACTCATCCGAGTTAT  
TCCCCTTCCCTCTCCAAGGAGATCGAGGTTGACACCACAGATGGCAGATTTCGCACAA  
CACGAGCCGTGTTTCACTAGTCGGCTTGTTTCTGACGATCCGGACGCGAGAGATGATC  
CCCCGAAAGGGGATCGCGCGGGAATTGATTAATCCGCGCCACGTCGCGTCCGTCCGTT  
AGCTTTGCTAACTTATTCACAGGATTTCGTTCTACGTTTTCGCGCGCCGCCAATCGAGAGG  
AAAACCGATTCAATCCGTAGATTGAATTTTCGCGCAATTCCGCTTGCGCAAACAAATTGC  
GCCTCGGCCAATCCCGATACACACACCGGAATAAAATAAAACCTGGGGGGAGGACCTG  
CTCGTTCCGTATACTATTTCTATAAATGGAAACCGAGGAAGGAGGGGAAGGAAAAAAA  
AAAAGAACGGGAGACAAGAAGATCCCTGATCGATATCGATCGATCGATTCCAGAAGTT  
TTGCTTGCTTGCTTGCCAGCTTGCTTGCGATCGTTCGGAAACAAAACGATGGATAGTAT  
AATTGAGATGGTTTTTTTCTCTTTTCTTTTTTACAGGATCGAGCGCGCACAAAAACGAC  
GCGACAGGAAATGGAAGGCCGGCTCCCCTTTTGGCGGAACCCAGATACGGCGCCGCG  
CCACAGCCATACG

>novel\_circ\_000208

GGCATGGCTGAGAGGAGCGATCGTCCTTGTCTTTCTGCTGGGACTCACCTGGACCTTC  
GGCCTTCTCTACTTGAACCAAGAATCCGTAGCGATGGCGTACATCTTCACCATATTGAAT  
AGCCTGCAGGGGCTGTTTATCTTTGTGTTCCATTGCGTTCAGAACGAGAAGGTGAGGA  
AGGAGTACAGGAAGTTCGTGCGCCGCCACTCCTGGTTGCCCAAGTGCCTCAGGTGCTC  
CAAGACGGTGGCCGGAAGCTCCGGTGGCTCTTCCGGCACCAAGCGGCGGCGGTGGTGG  
CGCGAATGGCGGCAAGGACTTCGGCTCGCACAAACACCTCGTCGAATCCGTCCGCGCCC  
ACCACGGACAGCTCCGGATTGTCGCCGCACGCCGCCTCCAATGTGGGTACAACAACGA  
CCACGTCACCGCCCAACAATCACAACAACCTGACCGCCGCCTGTAACAATACGAATCT  
TTCGATAAACGTGAACCTGAACAATTTGTCGCTGAGGTGCGCCGGTTCGGGGCACACCAG  
ATGCACATGATGGCACCTAGCAACCACAATAGGCATCCCGCTCAGCAAG

>novel\_circ\_000209

CGGCAACGACCACGACAACGTCCCGTCCGAGTCCTCCGTGGTTCATGACTTCTCAGCC  
GAGCGTTTGGAGCACGGCTAAGCCGACTGTCAGGCCTCCCTCGAGGATTACGACACCC  
TCGGCTCAGCAACCGCCGACGCCACCAGCACCGTCCACCCCGGCGCTCCCAATAACCA  
CCACTCCAAGTCCTACGTCGACGAGGTCGCCGCTCGATATGGAGGTCGAAGTGGACCA  
AGACTTAATATCTCCTGCGAACGTTCCGTCTGCGAATGCACCGGCGATGCCTCCGATCG  
TTCCCGAGACCACTCAGGCCACAACCACGTCGACCTTTGCCCCTTGGAGAACGAGTC  
GAAGGACCACTGTGCCGAGTACCTTATATCCGGAGTCGAGCTCGAACGGGCAGTGGTA  
CGACTACGGCAGACAAGTGTGTCCCCGGTGATAGCCAGGAACCTGTCGTGGAACAC  
GACCAGGGCGGGCGACGTAGCTGTTTCAAGTGTGTCGGGGCGGCGCAACGGTTTGGC  
GCGTTGGAGATGCCTGGCCAGGGGAGACACGGCCTTCTGGCACAGGGACAGCCCGGA  
TCTGAGCGAGTGCCGCTCCGTTTGGCTGACCACGCTCGAGAACAGGGTGACGGAGGG  
CGACGTGATCCTCGGGATCAGCCGCGAGCTGTCGCAGGTGACCAACAACAGCAGAGG  
GTTGTACGGTGGCGACATGATGATCACGACCAAGATCATCAAGAACATGGCGGAGAAG  
ATGGCGCAGGATATAAGAACGTATCAGGACGCGAATCAGAGGGAGGTGAGCGTGACC

GAGCTGCTCCAAGGTGTCGTGAGGACGGGTAGCAACCTGCTCGACAAGGCGCAAATG  
GCGTCCTGGAAGGATCTGAGCCATCAGGAGCAGATGAGAGTCGCGACCTCTTTATTGA  
TCGGGCTCGAGGAGAACGCGTTTTTGGCTCGCCGACACGTTGATGCACGAGAAAACGA  
TCACTCACGAGGGAAGGAACATACTGATGGAAGTACGCGTGTGGATGCACGGAACAT  
CGGTGACGATTTAGAGATATTTCCCGACAGAGGGCGGCTCAACAGAGGTGGACAGCCTCG  
AACGATCGTGTGAGTTAACTAGAGGAGCTTTGCTAGAGAACAGCGAGGGTGGCATTG  
TCCGTTTGGTCTTCATGGCCTTTGACAGGCTCGAGGAGATCTTGCAGCCGCAAGCCGA  
GGTGTGTCATCGTTGGTTCATGAACGACGAGCAGCAACCATTACCGAAAAGGAACACGAC  
CAGGCTTCTAAATAGCAAAGTGATCTCCGCGTCTTTAGGCAAAGGAAGGCATATTAG  
CTTAACGAGCCTGTGAGAGTCTATTTCAAGCATCTATCTATAGAGAACGTTACCAATCC  
GACTTGTGTGTTCTGGGATTACATCTTAAGCGCTTGGTCAGAGGAGGGTTGCGAAATAC  
GGAAAACCAACGAGACTCACACAGTGTGCGAGTGCAATCATCTTACGAATTTGCGCCGT  
TCTGATGGACGTTACGCTGTGAGATTGGACATAGCTCACCAGGTCGCGTTGCAAATCA  
TCACATACATCGGCTGCATCATTTCCGTGGTTTGCCTGGTTCTAGCAATTTTGACCTTTC  
AATTATTTGCGGACTGAAGTCGGACAGAACGACCATCCACAAGAATCTCTGCGTGTG  
CCTGTTGATCGCGGAAATTTTATTCGTTTTCGGAATCGGGCAAACGAACCAGAGAATT  
GTCTGCGGTATCGTCGCTGGATTATTGCATTTCTTTTTCTCTGCGCATTCGCCTGGATG  
TTCCTCGAAGGCTTCCAATTATACGTGATGCTGATCGAGGTGTTGGAAGCGGAAAAATC  
AAGGTTACGCTGGTATTATCTGATCGCCTACGGTGCTCCGTTACTGGTCGTGGCCATTT  
TTGTATAATCGATCCTCTCAGCTACGGAACCGATCGATATTGCTGGCTACGGGCGGACA  
ACTACTTCATCTTCAGCTTCGTTGGACCAGTGATACTCGTTATATTGGCGAACTTGGTAT  
TTCTTTCGATGGCGATTTATATGATGTGCCGGCACGCGAACACAACCGTAGCGATGAAG  
AGTAAGGAGCACTCACGATTGGCCAGCGCAAGTGGAAGGAAGAGAATGCTCTTCCC  
AACAAATTGCAAGCGCACTTGGCATGGCTGAGAGGAGCGATCGTCCTTGTCTTTCTGC  
TGGGACTCACCTGGACCTTCGGCCTTCTCTACTTGAACCAAGAATCCGTAGCGATGGC  
GTACATCTTCACCATATTGAATAGCCTGCAGGGGCTGTTTATCTTTGTGTTCCATTGCGT  
TCAGAACGAGAAGGTGAGGAAGGAGTACAGGAAGTTCGTGCGCCGCCACTCCTGGTT  
GCCCAAGTGCTCAGGTGCTCCAAGACGGTGGCCGGAAGCTCCGGTGGCTCTTCCGG  
CACCAGCGGCGGCGGTGGTGGCGCGAATGGCGGCAAGGACTTCGGCTCGCACAACAC  
CTCGTCGAATCCGTCCGCGCCACCACGGACAGCTCCGGATTGTCGCCGCACGCCGCC  
TCCAATGTGGGTACAACAACGACCACGTACCGCCCAACAATCACAACAACCTGACC  
GCCGCTGTAAACAATACGAATCTTTGATAAACGTGAACCTGAACAATTTGTCGCTGAG  
GTCGCCGGTCGGGGGCACACCAGATGCACATGATGGCACCTAGCAACCACAATAGGCAT  
CCCGCTCAGCAAG

>novel\_circ\_000211

CGGCAACGACCACGACAACGTCCCGTCCGAGTCCTCCGTGGTTCATGACTTCTCAGCC  
GAGCGTTTGGAGCACGGCTAAGCCGACTGTCAGGCCCTCCCTCGAGGATTACGACACCC  
TCGGCTCAGCAACCGCCGCAGCCACCAGCACCGTCCACCCCGGCGCTCCCAATAACCA  
CCACTCCAAGTCCTACGTCGACGAGGTGCGCGCTCGATATGGAGGTGGAAGTGGACCA  
AGACTTAATATCTCTGCGAACGTTCCGTCTGCGAATGCACCGGCGATGCCTCCGATCG  
TTCCCGAGACCACTCAGGCCACAACCACGTGACCTTTGCCCCCTGGAGAACGAGTC  
GAAGGACCACTGTGCCGAGTACCTTATATCCGGAGTCGAGCTCGAACGGGCGAGTGGTA  
CGACTACGGCAGACAAGTGTGTCCCCCGGTGATAGCCAGGAACCTGTCGTGGAACAC

GACCAGGGCGGGCGACGTAGCTGTTTCAGAGTTGTCCGGGCGGGCGCGAACGGTTTGGC  
GCGTTGGAGATGCCTGGCCAGGGGAGACACGGCCTTCTGGCACAGGGACAGCCCGGA  
TCTGAGCGAGTGCCGCTCCGTTTGGCTGACCACGCTCGAGAACAGGGTGACGGAGGG  
CGACGTGATCCTCGGGATCAGCCGCGAGCTGTCGCAGGTGACCAACAACAGCAGAGG  
GTTGTACGGTGGCGACATGATGATCACGACCAAGATCATCAAGAACATGGCGGAGAAG  
ATGGCGCAGGATATAAGAACGTATCAGGACGCGAATCAGAGGGAGGTGAGCGTGACC  
GAGCTGCTCCAAGGTGTCGTGAGGACGGGTAGCAACCTGCTCGACAAGGCGCAAATG  
GCGTCCTGGAAGGATCTGAGCCATCAGGAGCAGATGAGAGTCGCGACCTCTTTATTGA  
TCGGGCTCGAGGAGAACGCGTTTTTGTCTCGCCGACACGTTGATGCACGAGAAAACGA  
TCACTCACGAGGGAAGGAACATACTGATGGAAGTACGCGTGTTGGATGCACGGAACAT  
CGGTGACGATTTAGAGATATTCCCGACAGAGGCGGCTCAACAGAGGTGGACAGCCTCG  
AACGATCGTGTGAGTTAACTAGAGGAGCTTTGCTAGAGAACAGCGAGGGTGGCATTG  
TCCGTTTGGTCTTCATGGCCTTTGACAGGCTCGAGGAGATCTTGCAGCCGCAAGCCGA  
GGTGTATCGTTGGTCATGAACGACGAGCAGCAACCATTACCGAAAAGGAACACGAC  
CAGGCTTCTAAATAGCAAAGTGATCTCCGCGTCTTTAGGCAAAGGAAGGCATATTCAG  
CTTAACGAGCCTGTCAGAGTCTATTTCAAGCATCTATCTATAGAGAACGTTACCAATCC  
GACTTGTGTGTTCTGGGATTACATCTTAAGCGCTTGGTCAGAGGAGGGTTGCGAAATAC  
GGAAAACCAACGAGACTCACACAGTGTGCGAGTGCAATCATCTTACGAATTTGCGCGT  
TCTGATGGACGTTACGCTGTCAGATTGGACATAGCTCACCAGGTCGCGTTGCAAATCA  
TCACATACATCGGCTGCATCATTTCCGTGGTTTGCCTGGTTCTAGCAATTTTGACCTTTC  
AATTATTTGCGGACTGAAGTCGGACAGAACGACCATCCACAAGAATCTCTGCGTGTG  
CCTGTTGATCGCGGAAATTTTATTCGTTTTCGGAATCGGGCAAACGAACCAGAGAATT  
GTCTGCGGTATCGTCGCTGGATTATTGCATTTCTTTTCTCTGCGCATTCGCCTGGATG  
TTCCTCGAAGGCTTCCAATTATACGTGATGCTGATCGAGGTGTTTGAAGCGGAAAAATC  
AAGGTTACGCTGGTATTATCTGATCGCCTACGGTGCTCCGTTACTGGTCGTGGCCATTTC  
TTGTATAATCGATCCTCTCAGCTACGGAACCGATCGATATTGCTGGCTACGGGCGGACA  
ACTACTTCATCTTCAGCTTCGTTGGACCAGTGATACTCGTTATATTGGCGAACTTGGTAT  
TTCTTTCGATGGCGATTTATATGATGTGCCGGCACGCGAACACAACCGTAGCGATGAAG  
AGTAAGGAGCACTCACGATTGGCCAGCGCAAGTGGAAGGAAGAGAATGCTCTTCCC  
AACAAATTGCAAGCGCACTTGGCATGGCTGAGAGGAGCGATCGTCCTTGTCTTTCTGC  
TGGGACTCACCTGGACCTTCGGCCTTCTCTACTTGAACCAAGAATCCGTAGCGATGGC  
GTACATCTTCACCATATTGAATAGCCTGCAGGGGCTGTTTATCTTTGTGTTCCATTGCGT  
TCAGAACGAGAAGGTGAGGAAGGAGTACAGGAAGTTCGTGCGCCGCCACTCCTGGTT  
GCCAAGTGCTCAGGTGCTCCAAGACGGTGGCCGGAAGCTCCGGTGGCTCTTCCGG  
CACCAGCGGCGGCGGTGGTGGCGCGAATGGCGGCAAGGACTTCGGCTCGCACAAACAC  
CTCGTCGAATCCGTCCGCGCCACCACGGACAGCTCCGGATTGTCGCGCACGCGCC  
TCCAAT

>novel\_circ\_000212

TGATGGAAGTACGCGTGTTGGATGCACGGAACATCGGTGACGATTTAGAGATATTCCCG  
ACAGAGGCGGCTCAACAGAGGTGGACAGCCTCGAACGATCGTGTGAGTTAACTAGA  
GGAGCTTTGCTAGAGAACAGCGAGGGTGGCATTGTCCGTTTGGTCTTCATGGCCTTTG  
ACAGGCTCGAGGAGATCTTGCAGCCGCAAGCCGAGGTGTCATCGTTGGTCATGAACG  
ACGAGCAGCAACCATTACCGAAAAGGAACACGACCAGGCTTCTAAATAGCAAAGTGA

TCTCCGCGTCTTTAGGCAAAGGAAGGCATATTCAGCTTAACGAGCCTGTCAGAGTCTAT  
TTCAAGCATCTATCTATAGAGAACGTTACCAATCCGACTTGTGTGTTCTGGGATTACATC  
TTAAGCGCTTGGTCAGAGGAGGGTTGCGAAATACGGAAAACCAACGAGACTCACACA  
GTGTGCGAGTGCAATCATCTTACGAATTTGCGCGTTCTGATGGACGTTACGCTGTCAG  
ATTGGACATAGCTCACCAGGTCGCGTTGCAAATCATCACATACATCGGCTGCATCATT  
CCGTGGTTTGCCTGGTTCTAGCAATTTTGACCTTTCAATTATTTTCGCGGACTGAAGTCG  
GACAGAACGACCATCCACAAGAATCTCTGCGTGTGCCTGTTGATCGCGGAAATTTTATT  
CGTTTGCGGAATCGGGCAAACGAACCAGAGAATTGTCTGCGGTATCGTCGCTGGATTA  
TTGCATTTCTTTTCTCTGCGCATTCGCCTGGATGTTCTCGAAGGCTTCCAATTATAC  
GTGATGCTGATCGAGGTGTTTCAAGCGGAAAAATCAAGGTTACGCTGGTATTATCTGAT  
CGCCTACGGTGCTCCGTTACTGGTCGTGGCCATTTCTTGATAATCGATCCTCTCAGCTA  
CGGAACCGATCGATATTGCTGGCTACGGGCGGACAACACTTTCATCTTCAGCTTCGTTG  
GACCAGTGATACTCGTTATATTGGCGAAGTTGGTATTTCTTTCGATGGCGATTATATGAT  
GTGCCGGCACGCGAACACAACCGTAGCGATGAAGAGTAAGGAGCACTCACGATTGGC  
CAGCGCAAG

>novel\_circ\_000214

CGGCAACGACCACGACAACGTCCCGTCCGAGTCCCTCCGTGGTTCATGACTTCTCAGCC  
GAGCGTTTGGAGCACGGCTAAGCCGACTGTCAGGCCTCCCTCGAGGATTACGACACCC  
TCGGCTCAGCAACCGCCGCAGCCACCAGCACCGTCCACCCCGGCGCTCCCAATAACCA  
CCACTCCAAGTCCTACGTCGACGAGGTGCGCGCTCGATATGGAGGTCGAAGTGGACCA  
AGACTTAATATCTCCTGCGAACGTTCCGTCTGCGAATGCACCGGCGATGCCTCCGATCG  
TTCCCGAGACCACTCAGGCCACAACCACGTGACCTTTGCCCCTTGGAGAACGAGTC  
GAAGGACCACTGTGCCGAGTACCTTATATCCGGAGTCGAGCTCGAACGGGCAGTGGTA  
CGACTACGGCAGACAAGTGTGTCCCCCGGTGATAGCCAGGAACCTGTCGTGGAACAC  
GACCAGGGCGGGCGACGTAGCTGTTTCAAGTTGTCCGGGCGGCGCAACGGTTTGGC  
GCGTTGGAGATGCCTGGCCAGGGGAGACACGGCCTTCTGGCACAGGGACAGCCCGGA  
TCTGAGCGAGTGCCGCTCCGTTTGGCTGACCACGCTCGAGAACAGGGTGACGGAGGG  
CGACGTGATCCTCGGGATCAGCCGCGAGCTGTCGCAGGTGACCAACAACAGCAGAGG  
GTTGTACGGTGGCGACATGATGATCACGACCAAGATCATCAAGAACATGGCGGAGAAG  
ATGGCGCAGGATATAAGAACGTATCAGGACGCGAATCAGAGGGAGGTGAGCGTGACC  
GAGCTGCTCCAAGGTGTCGTGAGGACGGGTAGCAACCTGCTCGACAAGGCGCAAATG  
GCGTCTTGAAGGATCTGAGCCATCAGGAGCAGATGAGAGTCGCGACCTCTTTATTGA  
TCGGGCTCGAGGAGAACGCGTTTTTGGCTCGCCGACACGTTGATGCACGAGAAAACGA  
TCACTCACGAGGGAAGGAACATAC

>novel\_circ\_000215

CGGCAACGACCACGACAACGTCCCGTCCGAGTCCCTCCGTGGTTCATGACTTCTCAGCC  
GAGCGTTTGGAGCACGGCTAAGCCGACTGTCAGGCCTCCCTCGAGGATTACGACACCC  
TCGGCTCAGCAACCGCCGCAGCCACCAGCACCGTCCACCCCGGCGCTCCCAATAACCA  
CCACTCCAAGTCCTACGTCGACGAGGTGCGCGCTCGATATGGAGGTCGAAGTGGACCA  
AGACTTAATATCTCCTGCGAACGTTCCGTCTGCGAATGCACCGGCGATGCCTCCGATCG  
TTCCCGAGACCACTCAGGCCACAACCACGTGACCTTTGCCCCTTGGAGAACGAGTC  
GAAGGACCACTG



>novel\_circ\_000216

GTAGTGGAATGTACAACCTCGGATGCAGAAGCGTGGACATTTTTGTATAGATTATCTTTC  
GTGTAACGTTATCAGTTCGCAATGGAATGGAATAGAATAGTAAACGCTCTCGAAAACA  
GAAACAATTTTTCAACATGAACATCGGAGCTACGAGTTATCCAGCCGGTCCGCGCTTCC  
AGACAGACGTATAGATCGCGGCCCATAAATAACAAGGAAGGGAAGGGCCCTCGTCTTT  
AATACGATCCCCGTTTCCCGAACTCATAACCGTTGATCTTCCGCTGGAAATTCACGAGG  
AAAATGCGACAAAAGTTCACCGCGCAAGAAGATGCACACGATGTAACATTCAACAAA  
CACCGGTAGACAATGTTCCAACTATACAACATACATTTTGACAAGTTCCAGTTTCGCT  
TCGCAAGCAGCCGGAAATTGAACACCGGCTGTGTTTCCTGTATCCACGGCGGCGAGCC  
AGATTCCGCGATGGTAGTTTTACCGCGCTTTCAAGACAAACCCTGAGACGATGAAACG  
GATTTACACGGTAAGGCAGACACGGTTCACGCCACTCTTAAGTGGCGGCCATGATACT  
TTCGGTAGTTCATCCTGTTCTTCTTTGGATTAAATATTTCAAATTCTAAGTCTGTGTAA  
ATAGTCGGATACTATGCAATATGTGGTAATTTTTATTGGTGACAACTCTTTAATTCTTTA  
ATTAATATGAAATGATCTTTTAGATAAAATTATCAAGAAAGAAAATAAGAAGATCGAAA  
TTGAAAAATTCATCACATATCGAATATATACAGTTTCATGGATCATCTTTGAAAGGATTCT  
AGAAGCAA

>novel\_circ\_000217

GTAGTGGAATGTACAACCTCGGATGCAGAAGCGTGGACATTTTTGTATAGATTATCTTTC  
GTGTAACGTTATCAGTTCGCAATGGAATGGAATAGAATAGTAAACGCTCTCGAAAACA  
GAAACAATTTTTCAACATGAACATCGGAGCTACGAGTTATCCAGCCGGTCCGCGCTTCC  
AGACAGACGTATAGATCGCGGCCCATAAATAACAAGGAAGGGAAGGGCCCTCGTCTTT  
AATACGATCCCCGTTTCCCGAACTCATAACCGTTGATCTTCCGCTGGAAATTCACGAGG  
AAAATGCGACAAAAGTTCACCGCGCAAGAAGATGCACACGATGTAACATTCAACAAA  
CACCGGTAGACAATGTTCCAACTATACAACATACATTTTGACAAGTTCCAGTTTCGCT  
TCGCAAGCAGCCGGAAATTGAACACCGGCTGTGTTTCCTGTATCCACGGCGGCGAGCC  
AGATTCCGCGATGGTAGTTTTACCGCGCTTTCAAGACAAACCCTGAGACGATGAAACG  
GATTTACACGGTAAGGCAGACACGGTTCACGCCACTCTTAAGTGGCGGCCATGATACT  
TTCGGTAGTTCATCCTGTTCTTCTTTGGATTAAATATTTCAAATTCTAAGTCTGTGTAA  
ATAGTCGGATACTATGCAATATGTGGTAATTTTTATTGGTGACAACTCTTTAATTCTTTA  
ATTAATATGAAATGATCTTTTAGATAAAATTATCAAGAAAGAAAATAAGAAGATCGAAA  
TTGAAAAATTCATCACATATCGAATATATACAGTTTCATGGATCATCTTTGAAAGGATTCT  
AGAAGCAAGTACAAAA

>novel\_circ\_000219

GTAGTGGAATGTACAACCTCGGATGCAGAAGCGTGGACATTTTTGTATAGATTATCTTTC  
GTGTAACGTTATCAGTTCGCAATGGAATGGAATAGAATAGTAAACGCTCTCGAAAACA  
GAAACAATTTTTCAACATGAACATCGGAGCTACGAGTTATCCAGCCGGTCCGCGCTTCC  
AGACAGACGTATAGATCGCGGCCCATAAATAACAAGGAAGGGAAGGGCCCTCGTCTTT  
AATACGATCCCCGTTTCCCGAACTCATAACCGTTGATCTTCCGCTGGAAATTCACGAGG  
AAAATGCGACAAAAGTTCACCGCGCAAGAAGATGCACACGATGTAACATTCAACAAA  
CACCGGTAGACAATGTTCCAACTATACAACATACATTTTGACAAGTTCCAGTTTCGCT  
TCGCAAGCAGCCGGAAATTGAACACCGGCTGTGTTTCCTGTATCCACGGCGGCGAGCC

AGATTCCGCGATGGTAGTTTTACCGCGCTTTCAAGACAAACCCTGAGACGATGAAACG  
GATTTACACGGTTGATTGAAGAGGAGTTATACAGTATCGACGTCAGCGACAATGCTAGG  
CCGAAAGTTGTAGCGGGCGATGTCGGCAAATTGGTGAAAGGGTTGGCTTCAAACCTGA  
AATTGAGAGGGGTTGGACGTCGCCGGTACCCAACATCAGAAGGGCAGAGGCGGGATA  
CGACGCTTCTGGGCTGTCGTGAACCCTGGGCTGGAGCCACCGGTGTACTTGGCAGAG  
AGTGCTTTTCATCTCCGTAAATGGACCGGCGGTAAAGCAATTTTGGTACATTACCTATAC  
CTGCTTTAACCCCTCCCCCGCCTTTTCTGTCTCAGACTTCCCGACCACCCCCATCGTCTTTC  
ATCTTGATCATCCGACTCTCGATCGCGGGGAACGTTTGATTTCGATGGGAAACGTCTGT  
AAAGGCATTAAAGGGGGTGGGGGAGGTATAGGGGTACAGGATCGGTGGCGGTGGTGG  
TGGCCGCCAGACCCGTGAAACAAAGAAGCGATTTTCGCTGTTTCCATCCACGTTGGCGC  
CGGCGACGGCCTTTTTGTAAATGACCGTAATCGCGCGCCACCCTCCCTCTTTGAGAGA  
AGTTAAAACCCCTCTTCTCTCTCTCCCTTCTCGCTCTTTCTATTTCTCTCGCTCTCTGCG  
ACGAGTGACGTTGATCGAGCGGTTGCTCCAACCTTAGCGGAAATTTCAACGCGGCGTC  
CAACAGTTTCTCAAACAATCGATCCGTAATGTGGCACCGGCGGCGGCTATTTTTAGTTG  
CTTCTTTCTTCTTCTGGACCCGGCTAACTTCTTCTCTATAATCGTGCCGTACTTTTAACC  
TTTCACGTGAAGAACGCCAACGCGTCTCGTTGTGTTCCGGTTCGTCTATCGCGAATTTT  
CTAAATATTTCTTTCCCTTCTCTTTTTCTCTCTTTTTCTTTTCTTTTACTTCGTTTCAATC  
TACGAGTTGATTTCGTGTGTATAAAATTTTTACGTTTCGATCTCTTTTTCTATCGACTATCTA  
ATACGCGTGGAACATTTATAAACTCGTTTATTCTTTTATAGATTGATGGAAATAACAAA  
AGGAGAAGGGGATGGATGGTAAATTTTCAAAGGCTGCAACATCGATCTTAACGAGCAT  
GAAAACGCGTACCGACGTTATTTGGGGCGACCTCGCGAGATATCCAATTCAAAAATCTC  
GTTTCGAATCGAATCGTTGTTTAAATGTCGGCGACCCCTCGTTGACCCAGTTTCGCTTGCC  
GTAGCGTTAGATTTACCGCAGCGAGAAAAAAGGAATGGAGAGAAGAATAAGAGAGAG  
AGAGACAGAGAGAGAGAGAGAGAGAAAGAGAGGGAGAGGGAGAATTGGCTCGTAGCTA  
GAAAGTATCAACGTTTAATCCAGCCTGATTGCATTCGGTCGTGCGACGATTTTACGAGC  
GCGCTCAAAACGGCCTGGCAAACACATTTTCCTTTTCGCGAATTTTTTTCCTGCAATCA  
CGACCGAGATGAGCAAACGTTTCGTAAACGTTTCGTGCATCGTTCCCTAGTTTCGCTTCTG  
ACCTGGCAACTAATTTTTGTCCACCAGGAGAAGAAATCCAGCCGAAACGAAGTGCCTG  
GGGAGAGTTGACGAATTTATCGATTTCGTGTACGGGGTAAAAATTGCACGCGTGACAC  
GAGAGATTTGAAACAGGTTTGTGCGAAATTGGAATATGCCTCGTGCGTATTTAATGAAA  
ATATGATATTTTTAAATCGAATTTTTTTTACTTTTTTCTCTTTTTTTTTTTTTTCGCCAT  
CGTAACATGTTTTGAAACATTTAGTGCTAAAAGCAATGCGCGAAATGTAATTAATCCTC  
CCATGCGCAACATTTCCGATTTTTCGTCTATAATAATATTGTTTTTTTTTTTTTATTATTT  
CAGTTTATTTCGATTATCGAAACTATAAGATCAAAAGCATCGATTTTCGTTCAACAATATAT  
TTTAATATTTGATTATTGTCTGTTGTTTACGCGGGAGGAGAAACCAATGAGACGCGTAA  
AAATGAAAGATTTTTTATCGAGTCATAACAATCAATTCGATCAATTCTATATCGTTTATAT  
ATCGGTTATTTAATTATTTAAATTCCTTTCTGTTTAAATTATACGTTTATCAACCTCGAATT  
GAAAGTACGATAAAAAATTTCTATTTTAAATTAATTAACAAGAAAACCTTCTAAATCTTCT  
CAAGTTAATTAAAAAAGAAAAACAAGTTTCTCACATAAATCTTTATTTACAAAGATTC  
TATCGATTTCAAGAACAGGCAATCCATACTTCCAACCTATCTCAGAAAGTGTCGCAAAAA  
TCAATCGAATAGATGCGTAGCGAATTCATTTATCACAGAGTGAAATTTAGTTACGGATTC  
TCATCGAGGCAAAGAAAAAGACGGCTAGACACGACTAGAGACAGAGAGAGAGAGAGAG  
TAACTTTTCCTCCGCGCGCTTTGCGGCCGTGAAGAAGGGGGTTGTGCCGCTTTTGTCTG  
GCTGCACAGACGCGTGGAAGAAAGAGAGGCCGATGGGCAGCCTCTTTAAAGAGTAATT

ACGCCTACACTCGATGTATCCTGCGCCCCGTGATATTCTTCATCGTTTTTTTTTTCAG

>novel\_circ\_000220

TGGAATGTACAACCTCGGATGCAGAAGCGTGGACATTTTTGTATAGATTATCTTTCGTGTA  
ACGTTATCAGTTCGCAATGGAATGGAATAGAATAGTAAACGCTCTCGAAAACAGAAAC  
AATTTTTCAACATGAACATCGGAGCTACGAGTTATCCAGCCGGTCCGCGCTTCCAGACA  
GACGTATAGATCGCGGCCCATAAATAACAAGGAAGGGAAGGGCCCTCGTCTTTAATAC  
GATCCCCGTTTCCCGAACTCATAACCGTTGATCTTCCGCTGGAAATTCACGAGGAAAAT  
GCGACAAAAGTTACCCGCGCAAGAAGATGCACACGATGTAACATTCAACAAACACCG  
GTAGACAATGTTCCAAACTATACAACATACATTTTGACAAGTTCCAGTTTCGCTTCGCA  
AGCAGCCGGAATTGAACACCGGCTGTGTTTCCTGTATCCACGGCGGCGAGCCAGATT  
CCGCGATGGTAGTTTTACCGCGCTTTCAAGACAAACCCTGAGACGATGAAACGGATTT  
ACACGGTAAGGCAGACACGGTTCACGCCACTCTTAAGTGGCGGCCATGATACTTTCGG  
TAGTTCATCCTGTTCTTCTTTGGATTAAATATTTCAAATTCTAAGTCTGTGTTAAATAGT  
CGGATACTATGCAATATGTGGTAATTTTTATTGGTGACAACTCTTTAATTCTTTAATTAA  
TATGAAATGATCTTTTAGATAAAATTATCAAGAAAGAAAATAAGAAGATCGAAATTGAA  
AAATTCATCACATATCGAATATATACAGTTTCATGGATCATCTTTGAAAGGATTCTAGAA  
GCAA

>novel\_circ\_000221

ATTTTTCAACATGAACATCGGAGCTACGAGTTATCCAGCCGGTCCGCGCTTCCAGACAG  
ACGTATAGATCGCGGCCCATAAATAACAAGGAAGGGAAGGGCCCTCGTCTTTAATACGA  
TCCCCGTTTCCCGAACTCATAACCGTTGATCTTCCGCTGGAAATTCACGAGGAAAATGC  
GACAAAAGTTACCCGCGCAAGAAGATGCACACGATGTAACATTCAACAAACACCGGT  
AGACAATGTTCCAAACTATACAACATACATTTTGACAAGTTCCAGTTTCGCTTCGCAAG  
CAGCCGGAATTGAACACCGGCTGTGTTTCCTGTATCCACGGCGGCGAGCCAGATTCC  
GCGATGGTAGTTTTACCGCGCTTTCAAGACAAACCCTGAGACGATGAAACGGATTTAC  
ACGGTTGATTGAAGAGGAGTTATACAGTATCGACGTCAGCGACAATGCTAGGCCGAAA  
GTTGTAGCGGGCGATGTCGGCAAATTGGTGAAAGGGTTGGCTTCAAACCTGAAATTGAG  
AGGGGTTGGACGTCGCCGTACCCAACATCAGAAGGGCAGAGGCGGGATACGACGCT  
TCTGGGCTGTCGTGAACCCTGGGCTGGAGCCACCGGTGTACTTGGCAGAGAGTGCTTT  
TCATCTCCGTAAATGGACCGGCGGTAAAGCAATTTTGGTACATTACCTATACCTGCTTTA  
ACCCCTCCCCCGCCTTTTCTGTACAGACTTCCCGACCACCCCATCGTCTTTCATCTTGCA  
TCATCCGACTCTCGATCGCGGGGAACGTTTGATTTGATGGGAAACGTCGTAAAGGCA  
TTAAAGGGGGTGGGGGAGGTATAGGGGTACAGGATCGGTGGCGGTGGTGGTGGCCGC  
CAGACCCGTGAAACAAAGAAGCGATTTTCGCTGTTTCCATCCACGTTGGCGCCGGCGAC  
GGCCTTTTTGTAAATGACCGTAATCGCGCGCCACCCTCCCTCTTTGAGAGAAGTTAAAA  
CCCTCTTCTCTCTCTCCCTTCTCGCTCTTTCTATTTCTCTCGCTCTCTGCGACGAGTGA  
CGTTGATCGAGCGGTTGCTCCAACCTTTAGCGGAAATTTCAACGCGGCGTCCAACAGTT  
TCTCAAACAATCGATCCGTAATGTGGCACCGGCGGGCGGCTATTTTTAGTTGCTTCTTTCT  
TCCTTCTGGACCCGGCTAACTTCTTCTCTATAATCGTGCCGTACTTTTAACCTTTACGT  
GAAGAACGCCAACGCGTCTCGTTGTGTTCCGGTTCGTCTATCGCGAATTTTCTAAATAT  
TTCTTTTCCCTTCTCTTTTCCCTCTCTTTTCTTTTCTTTTACTTCGTTTCAATCTACGAGTT  
GATTCGTGTGTATAAAATTTTTACGTTTCGATCTCTTTTTCTATCGACTATCTAATACGCGT

GGAACATTTATAAACTCGTTTATTCTTTTATAGATTGATGGAAATAACAAAAGGAGAA  
GGGGATGGATGGTAAATTTTCAAAGGCTGCAACATCGATCTTAACGAGCATGAAAACG  
CGTACCGACGTTATTTTCGGGCGACCTCGCGAGATATCCAATTCAAAAATCTCGTTTCGCA  
ATCGAATCGTTGTTTAAATGTCGGCGACCCTCGTTGACCCAGTTCGCTTGCCGTAGCGT  
TAGATTTACCGCAGCGAGAAAAAAGGAATGGAGAGAAGAATAAGAGAGAGAGAGAC  
AGAGAGAGAGAGAGAGAAAAGAGAGGGGAGAGGGAGAATTGGCTCGTAGCTAGAAAGT  
ATCAACGTTTAATCCAGCCTGATTGCATTTCGGTCGTGCGACGATTTTACGAGCGCGCTC  
AAAACGGCCTGGCAAACACATTTTCTTTTCGCGAATTTTTTTCCTGCAATCACGACCG  
AGATGAGCAAACGTTTCGTAAACGTTTCGTGCATCGTTCCCTAGTTTCGCTTCTGACCTGGC  
AACTAATTTTTGTCCACCAGGAGAAGAAATCCAGCCGAAACGAAGTGCCTGGGGAGA  
GTTGACGAATTTATCGATTTCGTGTACGGGGTAAAAATTGCACGCGTGCACACGAGAGA  
TTTGAAACAGGTTTGTCTGGAAATTGGAATATGCCTCGTGCGTATTTAATGAAAATATGAT  
ATTTTTAAATCGAATTTTTTTTACTTTTTTCTCTCTTTTTTTTTTTTTTCGCCATCGTAAC  
ATGTTTTGAAACATTTAGTGCTAAAAGCAATGCGCGAAATGTAATTAATCCTCCCATGC  
GCAACATTTCCGATTTTTTCGTCTATAATAATATTGTTTTTTTTTTTTTATTATTTCAAGTTTA  
TTCGATTATCGAAACTATAAGATCAAAAGCATCGATTTTCGTTCAACAATATATTTTAATAT  
TTGATTATTGTCGTTGGTTCACGCGGGAGGAGAAACCAATGAGACGCGTAAAAATGAA  
AGATTTTTTATCGAGTCATAACAATCAATTCGATCAATTCATATCGTTTATATATCGGTTA  
TTTAATTATTTAAATTCTTTTCTGTTTAAATTATACGTTTATCAACCTCGAATTGAAAGTA  
CGATAAAAATTTCTATTTTAAATTAATTAACAAGAAAACCTCTAAATCTTCTCAAGTTA  
ATTAAAAAAAGAAAAACAAGTTTCTCACATAAATCTTTATTTACAAAGATTCTATCGATT  
TCAAGAACAGGCAATCCATACTTCCAACATCTCAGAAAGTGTCGCAAAAATCAATCG  
AATAGATGCGTAGCGAATTCATTTATCACAGAGTGAAATTTAGTTACGGATTCTCATCGA  
GGCAAAGAAAAAGACGGCTAGACACGACTAGAGACAGAGAGAGAGAGAGTAACTTT  
CCTCCGCGCGCTTTGCGGCCGTGAAGAAGGGGGTTGTGCCGCTTTTGTCTGCTGCAC  
AGACGCGTGGAAGAAGAGGCCGATGGGCAGCCTCTTTAAAGAGTAATTACGCCTA  
CACTCGATGTATCCTGCGCCCCGTGATATTCTTCATCGTTTTTTTTTTTCAG

>novel\_circ\_000222

ATTTTTCAACATGAACATCGGAGCTACGAGTTATCCAGCCGGTCCGCGCTTCCAGACAG  
ACGTATAGATCGCGGCCATAAATAACAAGGAAGGGAAGGGCCCTCGTCTTTAATACGA  
TCCCCGTTTCCCGAACTCATAACCGTTGATCTTCCGCTGGAATTCACGAGGAAAATGC  
GACAAAAGTTACCCGCGCAAGAAGATGCACACGATGTAACATTCAACAAACACCGGT  
AGACAATGTTCCAAACTATACAACATACATTTTGACAAGTTCCAGTTTTCGCTTCGCAAG  
CAGCCGGAAATTGAACACCGGCTGTGTTTCTGTATCCACGGCGGCGAGCCAGATTCC  
GCGATGGTAGTTTTACCGCGCTTTCAAGACAAACCCTGAGACGATGAAACGGATTAC  
ACGGTTGATTGAAGAGGAGTTATACAGTATCGACGTCAGCGACAATGCTAGGCCGAAA  
GTTGTAGCGGGCGATGTCGGCAAATTGGTGAAAGGGTTGGCTTCAAACCTGAAATTGAG  
AGGGGTGGACGTCGCCGTACCCAACATCAGAAGGGCAGAGGCGGGATACGACGCT  
TCTGGGCTGTCTGTAACCCTGGGCTGGAGCCACCGGTGTACTTGGCAGAGAGTGCTTT  
TCATCTCCGTAAATGGACCGGCGGTAAAGCAATTTTGGTACATTACCTATACCTGCTTTA  
ACCCCTCCCCCGCCTTTTCTGTCAGACTTCCCGACCACCCCATCGTCTTTCATCTTGCA  
TCATCCGACTCTCGATCGCGGGGAACGTTTGATTTTCGATGGGAAACGTCGTAAAGGCA  
TTAAAGGGGGTGGGGGAGGTATAGGGGTACAGGATCGGTGGCGGTGGTGGTGGCCGC

CAGACCCGTGAAACAAAGAAGCGATTTTCGCTGTTTCCATCCACGTTGGCGCCGGCGAC  
GGCCTTTTTGTAAATGACCGTAATCGCGCGCCACCCTCCCTCTTTGAGAGAAGTTAAAA  
CCCTCTTCTCTCTCTCCCCTTCTCGCTCTTTCTATTTCTCTCGCTCTCTGCGACGAGTGA  
CGTTGATCGAGCGGTTGCTCCAACTTTAGCGGAAATTTCAACGCGGCGTCCAACAGTT  
TCTCAAACAATCGATCCGTAATGTGGCACCGGCGGGCTATTTTTAGTTGCTTCTTTCT  
TCCTTCTGGACCCGGCTAACTTCTTCTCTATAATCGTGCCGTACTTTTAACTTTTACGT  
GAAGAACGCCAACGCGTCTCGTTGTGTTCCGGTTCGTCTATCGCGAATTTTCTAAATAT  
TTCTTTTCCCTTCTCTTTTTTCTCTTTTTCTTTTTACTTCGTTTCAATCTACGAGTT  
GATTCGTGTGTATAAAATTTTTACGTTTCGATCTCTTTTTCTATCGACTATCTAATACGCGT  
GGAACATTATATAAACTCGTTTATTCTTTTATAGATTGATGGAAATAACAAAAGGAGAA  
GGGGATGGATGGTAAATTTTCAAAGGCTGCAACATCGATCTTAACGAGCATGAAAACG  
CGTACCGACGTTATTTTCGGGCGACCTCGCGAGATATCCAATTCAAAAATCTCGTTTCGA  
ATCGAATCGTTGTTTAAATGTGCGGCGACCCTCGTTGACCCAGTTCGCTTGCCGTAGCGT  
TAGATTTACCGCAGCGAGAAAAAAGGAATGGAGAGAAGAATAAGAGAGAGAGAGAC  
AGAGAGAGAGAGAGAGAAAGAGAGGGAGAGGGAGAATTGGCTCGTAGCTAGAAAGT  
ATCAACGTTTAAATCCAGCCTGATTGCATTCGGTCGTGCGACGATTTTACGAGCGCGCTC  
AAAACGGCCTGGCAAACACATTTTCTTTTCGCGAATTTTTTTTCTGCAATCACGACCG  
AGATGAGCAAACGTTTCGTAAACGTTTCGTGCATCGTTCCCTAGTTCGCTTCTGACCTGGC  
AACTAATTTTTGTCCACCAGGAGAAGAAATCCAGCCGAAACGAAGTGCCTGGGGAGA  
GTTGACGAATTTATCGATTTCGTGTACGGGGTAAAAATTGCACGCGTGCACACGAGAGA  
TTTGAAACAGGTTTGTGCGAAATTGGAATATGCCTCGTGCGTATTTAATGAAAATATGAT  
ATTTTTAAATCGAATTTTTTTTACTTTTTTTCTCTTTTTTTTTTTTTTCGCCATCGTAAC  
ATGTTTTGAAACATTTAGTGCTAAAAGCAATGCGCGAAATGTAATTAATCCTCCCATGC  
GCAACATTTTCCGATTTTTTCGTCTATAATAATATTGTTTTTTTTTTTTTATTATTTTCAAGTTTA  
TTCGATTATCGAAACTATAAGATCAAAAGCATCGATTTTCGTTCAACAATATATTTTAATAT  
TTGATTATTGTGTTGGTTCACGCGGGAGGAGAAACCAATGAGACGCGTAAAAATGAA  
AGATTTTTTATCGAGTCATAACAATCAATTCGATCAATTCTATATCGTTTATATATCGGTTA  
TTTAATTATTTAAATTCTTTTCTGTTTAAATTATACGTTTATCAACCTCGAATTGAAAGTA  
CGATAAAAATTTCTATTTTAAATTAATTAACAAGAAAACCTCTAAATCTTCTCAAGTTA  
ATTAAAAAAGAAAAACAAGTTTCTCACATAAATCTTTATTTACAAAGATTCTATCGATT  
TCAAGAACAGGCAATCCATACTTCCAATCTCAGAAAGTGTGCAAAAATCAATCG  
AATAGATGCGTAGCGAATTCATTTATCACAGAGTGAAATTTAGTTACGGATTCTCATCGA  
GGCAAAGAAAAAGACGGCTAGACACGACTAGAGACAGAGAGAGAGAGAGTAACTTT  
CCTCCGCGCGCTTTGCGGCCGTGAAGAAGGGGGTTGTGCCGCTTTTGTGCTGCTGCAC  
AGACGCGTGGAAGAAGAGAGCCGATGGGCAGCCTCTTTAAAGAGTAATTACGCCTA  
CACTCGATGTATCCTGCGCCCCGTGATATTCTTCATCGTTTTTTTTTTCAGGTGAATACGT  
GTTTGTGTTGCCATTGTTCCATCCTCGAGGAGCAGCCACTTGAAGTCCCATACGCGTCGA  
ATCCTTTAGAAAACCTGCGACGAGAGGGCGCGGGAGGATCGAAGAGACGAGACTTCATA  
CGAGACTTCG

>novel\_circ\_000225

CTAAAATGGCGTATTCCGCGCCGAAGAACGTGGTCTCGTTGGCCGAGGGTATGCCGAA  
CGAAGAAACCTTCCCTTTCACGGAGATCTCCATCAAACCTTAACGATGGATCGTCTTCA  
CCCTAGACGAACGAGAATTGGGCGCAGCTTTGCAATATATTCCCACTCAGGGTTACCCG

CCGCTTCTTCAGACCCTGAGGGAGTTCCAGAGAAGGGCGCACGCACCTCCCTTATGGG  
AGAGCCGCGACATCATAATCGTCTCCGGTTCTCAAGATGGATTAAGCAAAACTCTCGA  
GGCCATACTCGAACCTGGCGACTCGCTCTTGGTGCACGATCCTTTCTATCCAGGCGTGG  
ACATTGTG

>novel\_circ\_000226

CTAAAATGGCGTATTCCGCGCCGAAGAACGTGGTCTCGTTGGCCGAGGGTATGCCGAA  
CGAAGAAACCTTCCCTTTCACGGAGATCTCCATCAAACCTTAACGATGGATCGTCTTTCA  
CCCTAGACGAACGAGAATTGGGCGCAGCTTTGCAATATATTCCCACTCAGGGTTACCCG  
CCGCTTCTTCAGACCCTGAGGGAGTTCCAGAGAAGGGCGCACGCACCTCCCTTATGGG  
AGAGCCGCGACATCATAATCGTCTCCGGTTCTCAAGATGGATTAAGCAAAACTCTCGA  
GGCCATACTCGAACCTGGCGACTCGCTCTTGGTGCACGATCCTTTCTATCCAGGCGTGG  
ACATTGTGGTCTCGCCGTATAAGATAGAGTTGATCCCGATCCCTCAGGATGAGCACGGT  
TTGATTCCGGATATTTTGAGGGAAACGTTAAGAAACAGAAAGCTGTCCGGGAAGAAAA  
TGCCGAAAATAATGTACATAAATGCCACCGGAATGAATCCCACCGGTGTCGTTATTCCT  
TTGGAAGACGAAAGGAGATCTATAGGATAGCTTGCGAATACAACTTCTTGATCCTGG  
ACGATGATCCTTACCACTTCTTGCACTTCGAGGAGGTGGAGCCAAAATCGTTCTTATCA  
CTGGACACCGAAGGAAGGGTAATTAGGCTTGACTCCTTCTCTAAAGTGGTCAGTAGCG  
GTATCAGATTGGGCTTCATCACGGCGGCGGCTCCATTGATAGCCAGTATAGAGCTCCAC  
TTGCAAAGCAGCCATCTCCACGCCCCTACGTTATCCCAGGCGATACTGTACAGGCTGAT  
GAAATTATGGGGATACGACGGGATGATAAACCATTTCAAATGGATAAGGCATTTCTATA  
AGAAACGGAGGGATATTATCGCTAGGTTCTGCTGAAAAACACTTGAATG

>novel\_circ\_000227

GTGTGGTTTCAAAATCGTCGAGCAAAGTGGAAAAACGGAAGAAGTGCGGCCCTGTT  
TTTCGTTCCCCACCGGTCCATTGCTGCCATCGCACGGGTGCCCCCGTTTGGGCCGAT  
GAGCTCCGATCTCTGTGGTGCTGGTATGTTTAGCGGACCTCCTGAAAGATGGACAATG  
GGAACAGGTCTTGGACAACCTGGGACAAGGAGGAATGGGAATGAGTGGTTTTGGCCAA  
AGTTTAGGACAACCTTGGTCAGCAAAGTACGGGGAGCCTCGGCTCGAGCTTGGGTCTTG  
GTAATTCTGGACTCCCGATCAGCAGTCCGTCGCAAGCCGTCTATCAAGCCAGTTATGGA  
CTGAATTCCCTTG

>novel\_circ\_000228

ATTATAAATAGTTATCAGAAAAAAGAAATATGCTAACGCGTCTCTTTGAAATTCACGGC  
CGGTTTTGCGCTGGACATCCCCTAGAAGTCATTGTGACGACCTTCACACTTACGGCATG  
CATTCTGAACATGGAGACAGGAAACGGACATCCAAGTGTTTCCTTTGACTGCACATTGT  
GGACCTGGTAGATGTAATTCTGATGATTAAATGCAGCTGATGTTATAGTCATGACTATA  
ATACGATGTTTAGCTATATTGTTTACTTATCATCAATTCGCAATTTGCAAAAATTGGGTT  
CAAAATATATTTTAG

>novel\_circ\_000230

GTGGCGTGGATCCACGTGGGTGCTCAGATGTTGTTGACCATCCACAAGCACGTGGTCG  
TGAAGATACCGAGGTTCTCGGTGTCCACGACAATCAGAAGACCTGGCTGCTTCACAT  
CAACAACGTGCAACAAGACGACCGGGGCTATTATATGTGCCAATTAAACACGAACCCG

ATGATGAGCCAGGTCGGCTTCCTTCAAGTCGTGCGCGCCCAACATTTTGGACTCGTT  
GTCCACCGAAAGCACGGTGGCGGTTCGTGAGAATCAGAATATCACGCTCACGTGCAAG  
GCGGACGGATATCCAACACCGAAACTGATGTGGAAGAGGGAAGACGGGCAGAACATA  
AACATCAATCGACATAAGAAAG

>novel\_circ\_000231

AAGAATAGTATGTATAAAGTACTTCACAATCAAGACATAAAACACGAGTGCTCGCGGTC  
AGGGGGACTGCACGCTTATCCTGATCATTTACAGGGAACCTAAAAAGCTTTACCTCTAAA  
CCAGCCGTCTGCTAAATGATCATTTAAAGGTTCTGTCTCTGGTAGGACTTTGTATATA  
GTGTAAATATCGCTTTTCTAACAAAGGATCTCGCTCAAATAAAAGAAAAAAAAAAAAA  
AAAAACGAGCAAGCTCGAAGAATCGAAACAAGTCACGCGGGGATTTCAAGGAGTCG  
AGAGAATTGCAAAGATTGCACTATTCCAAACCCCATATATAATATCCGACGCATGCATCA  
ACCTAGAACGCACTGACTCAGTCAACTAGTTCGCAAAACGCAACAAAAGAAATAAAG  
GAAAGAGGAAGATTGTTGGGAGAGAAAGAACGAGTGAAAAGAACGAGAGCACAAGA  
TGAAGCAACAAGCGTCGGAAGAATCCCTTTATGGATAAAGTTACTTTCCGCAGGCAC  
AGCAGCCTGTATCGCTGATTTAGCGACGTTTCCTTTGGACACCGCCAAAGTCAGAATG  
CAGATTGCCGGAGAAAGTCGTCCTCTTCTATTGGCGACTACGGATGGCTCCATGCTCGC  
GATGCGAAATACGCAACCAGGATTATGGAGGACAGTAAAGAACATCGTCAGACTCGAA  
GGAGCAAG

>novel\_circ\_000232

AAGAATAGTATGTATAAAGTACTTCACAATCAAGACATAAAACACGAGTGCTCGCGGTC  
AGGGGGACTGCACGCTTATCCTGATCATTTACAGGGAACCTAAAAAGCTTTACCTCTAAA  
CCAGCCGTCTGCTAAATGATCATTTAAAGGTTCTGTCTCTGGTAGGACTTTGTATATA  
GTGTAAATATCGCTTTTCTAACAAAGGATCTCGCTCAAATAAAAGAAAAAAAAAAAAA  
AAAAACGAGCAAGCTCGAAGAATCGAAACAAGTCACGCGGGGATTTCAAGGAGTCG  
AGAGAATTGCAAAGATTGCACTATTCCAAACCCCATATATAATATCCGACGCATGCATCA  
ACCTAGAACGCACTGACTCAGTCAACTAGTTCGCAAAACGCAACAAAAGAAATAAAG  
GAAAGAGGAAGATTGTTGGGAGAGAAAGAACGAGTGAAAAGAACGAGAGCACAAGA  
TGAAGCAACAAGCGTCGGAAGAATCCCTTTATGGATAAAGTTACTTTCCGCAGGCAC  
AGCAGCCTGTATCGCTGATTTAGCGACGTTTCCTTTGGACACCGCCAAAGTCAGAATG  
CAGATTGCCGGAGAAAGTCGTCCTCTTCTATTGGCGACTACGGATGGCTCCATGCTCGC  
GATGCGAAATACGCAACCAGGATTATGGAGGACAGTAAAGAACATCGTCAGACTCGAA  
GGAGCAAGGAGCCTGTACGGAGGTCTGTCCGCGGGACTCCAGAGACAGATGTGTTTC  
GCCAGCATACGGTTGGGCCTCTACGACGGGGTGAAGTCACGCTACGCTGGAATCATCG  
ACG

>novel\_circ\_000233

ACGTTGCCGTATCTCATGCAAAAAATATCTCCAGCGTTCGCATTGCCACTGTGCTCGTT  
CAAGGTCGAGAGGCACAAGGAGTCCACCGCCAGGGTAGCCATATGGCGGCAGTTAGG  
TGTTTCGAGAAGTTACACGATGGAGAGCAGTTTCTGCGGATGCGACCAGGGATTGCTC  
GCGGGTCTGCATCTGGACACGAAACACTTGAACGCCATCGGCCAGGATTTCTGTCAGG  
CTCTGTCAATGATGAAGGATTATACCGAGAATTGGAGTATTGACAAAGTCGTTGAAAGAG  
GAGTGTGCCCCGCTAAATGCATTTTGAAGAATCAAAAACCGTTGCTAAATGTATTCA

GGATAAGCCTGCGGCCCTTCATCTTGCCGCAATTCCTTAACGAATGATTAAGCAAAACT  
TGATTTGAGGATTCCCTATGGGAGAAGGTATTCCCGAGGAGTCAGGATGCATGGAAGAT  
GACATTTTCGTCTAGCTGCGAGTCAGACGAATCTGATTTTGAGACTTAAATAAATTTTAAT  
TTACAACGATTTCGACAACGATATCGACGATATCATAGCTTCTTTATAAATAGATCGGAAG

>novel\_circ\_000234

GTGTGGGCGAGGCTCGAGGAAGGGCACCTCGCGGAGGATTCTCGGGCGCAGCGAGG  
GAGATCGTAGCACAAGAGTGGAATAGGACAGACGAAAGATGGCGGCGTTCCCGGGG  
AGGAGGAGGAGTAGCGGCGAGGGGTCGGCGAGGATGGGATGGTGGACGGTGTGCA  
CCAGCAGCAGCTCCGGCTTCTCCTCTCGTTCCTGGTCCTGTTGTGCGCCCGACTCCCCG  
TCCGCTCGACACCCGCGGACATAGTGCAAAGGTTCCACGACCCGGAGGTGAAGAGGA  
TGAACCATTTGGTGGTGGACAAGAACACGGGGCGGGTGTACGTGGGGGCGGTGAACC  
GGCTTTACCAGCTCTCGCCCGACCTGAGCGTGGTCGTGAAGGAGGTGACCGGGCCGA  
AAGGGGACTCGAACGCTTGCTCCATGATCGACTGTCCCAGGGAGACCCCGACCCGGC  
TCGTGACAACGTGAACAAAGCCCTGGTGATCGACTACACGACCACCAGGCTCATCTC  
GTGCGGCAGCCTGTCCAGGGCACGTGCAGGGTGCGCAATCTTCACAACATCTCGGAC  
GTGGTGCAGGAGGTGAAGGAGGCCGTGGTCGCCAACAACGCGACCCGCGTCGACGGT  
CGCGTTCATAGCCCCGGGGCCCCCAACCCCCCGTCTCCCAGGTGATGTACGTGGGC  
GTCACGTTACCGGCAACTCGCCCTACCGATCCGAGGTGCCCCGCGGTCAGCTCGCGCT  
CGCTCGACAAGGACAGGATGCTCAACATCGCGGAGGCCGCGGTCACGACCGGGACCA  
GGATGTACGTCAACTCGTTGTCGCGCGAGAGATACCCCATCAACTACGTGTACGGGTTC  
AGCAGCGGCGGTTTTAGCTACTTCATGACCACGCAGATGAAGAACACCGATACGGCCG  
TGTTTCATATCCAAGTTGGTGCGGGTCTGCCACGACGACGAGCATTACTACTCGTACACC  
GAGATCCCGATCAACTGCACCAACGACGGCACGTACTACAATCTGGTGCAGGCGGCCT  
ACGTGGGCAAGGCCGGCTCGGTCCCTCGCCGGGGATTGGGCATCACCGCCCAGGACG  
ACGTGCTGTTGCGCGTTTTCTCCGAGAGCAACACCACCAGCAGCGACATACCCAAGAA  
CCATTCGGCGCTGTGCGTGTACTCGCTCAAGGCCATCCGAAGGAAGTTCATGACCAAC  
ATACAGAAGTGCTTCAGCGGCGAGGGGCACAGGGGATTGGAGTACATCTCCCCGAGC  
CACAAGTGCATCTTAACG

>novel\_circ\_000237

GTCGTGGTTGTATCTGTTTTGCACGCGATGCCACGGTCGCGACGACACCCCATCGTGG  
GAGCCACCCGGTTGGAGGAAAGCCTGCCCCCAACCGTTTTGCCCGAGCTACAGAAAA  
TTCGCCCCGGCTGTTGTGCCTGTTCTGCTGGGCCTGTTGCTGTGGGGCATCGTGTACAC  
GATACTCGGCGAGGACGCCGCCCCGGGCGGCCAGCTTTTCGGCCTCGCCGTCCTCTGC  
ATCGCGGCCCACTTCGGGGGATGGCTCTTCTCCTTGACCACCCTCCCCGCCCTGATCGG  
TATGCTCATCACCGGGATCGTGATGCAGAACATCGGCATGGTGAGCATCGACAGAAAC  
TACAACATCGTCGTCTCCAACCTTGCG

>novel\_circ\_000239

AAAAAAACATTAAAGTACAATTGAAAAGACAACCTGCTGAACCAATGCCTGCACATAT  
TGTATCAGGACGTGAAAATCCTATTTCACTTGACCTATACCCTATGAATTTATTGCTTAA  
AATTTAAATAAAAATGTTCTGAAAAAATTAA



>novel\_circ\_000240

AAAGGAAAAAACATTAAAGTACAATTGAAAAGACAACCTGCTGAACCAATGCCTGC  
ACATATTGTATCAGGACGTGAAAATCCTATTTCACTTGACCTATACCCTATGAATTTATT  
GCTTAAATTTAAATAAAAATGTTCTGAAAAAA

>novel\_circ\_000242

ACTCAGAAAAGAAGCAAAGGAAAAAACATTAAAGTACAATTGAAAAGACAACCTGC  
TGAACCAATGCCTGCACATATTGTATCAGGACGTGAAAATCCTATTTCACTTGACCTAT  
ACCCTATGAATTTATTGCTTAAATTTAAATAAAAAT

>novel\_circ\_000243

GTTGTCTTTTCAATTGTACTTTAATGTTTTTTTCTTTGCTTCTTTTCTGAGTCTTTCATTT  
TCTTTTACTCGTTTCAAAAAATCTTCTCTACATTTAGAATGAGTTAAATGTTCAATACGA  
ACATTTATTCTTTTGAATAATTCGTCCAC

>novel\_circ\_000244

GAAAAAGAATTCGACTGGGATTCAAAAACACAAGGACTAGTTTTAAGTTCTTTTTTCTA  
TGGATATATAAGTACTCAATTACTTGGAGGATTGCTTAGCACGCGTATTGGCGGGAAAA  
AAGTTTTTGGTTTTGGAATTGCAATTACTGCTTTTCTTACAATTATCACACCACCTTTAG  
TTAAAGTGAGCGTTTACATTTTGCTCGCTTTGCGAATTATAGAAGGAATTTGTGAGGGT  
GTAACATATCCTTGTATACATGCAATATGGGCACAATGGGCACCTCCATTGGAAAGATCA  
AAATTAGCAACCATTACATTCTCCGGAAGTTTCTTTGGAAGTGTATTTGCCATGCCAGTT  
GCCGGATTGATGACTGAATATCTTGGTTGGCCTTCTGTTTTTTATGGTTTTGGAGGAGCT  
GGTCTTATTTGGTTTTTTTATTGGTGGATAGTCATCAAAGATAGACCAGAGGACGATAAA  
TCTATTTCAAAAGCTGAACTTGAATATATTAAAAATAGTCTTGGAATTTGAAAGAAGA  
AAAAATTAAACATCCATGGAAAGCTATGCTTACATCTCCACCAGTTTGGGCAATTATCGT  
AGCTCATTTTAGCGAAAATTGGGGTTTCTATACTATGCTTACTCAGTTACCAACATTTAT  
GAATGATGTACTTGATTTTAAATTGGACAAAAGTGGATTTTATCTGCATTACCATATTTA  
GCTATGACTTTCGTGTTCAATTTTCTGGACATTTAGCAGATTATTTAAGAGTGAAAAA  
AATTTTAACGACTACACAGGTGCGTAAATTATTCAATTGCGGGGCTTTTTTATTTCAAAC  
TATATTTATGACCTGTACAGGTTTCAATTCAACAACAGCAGGGGTGTTATTTCTATTACT  
ATAGCTGTTGGTCTTGGTGGCTTTGCATGGTCCGGTTTTTG

>novel\_circ\_000245

GCCAAACAACGTGCCTCCGTAAAATGGCTCTTGTCGAAGGCGTACAACAACCGAGTG  
CCAGAAAACCTTCGCGAGCCGTATTATGTGATAATGAGAATCAAGAACACCTGAAGC  
CGCAGATCGTCCACGCACTTTCCAATGCGGAGCTGTACTGTTTGGCGCTGGCGAACAT  
CTATTCGGATCCAAATTATCACAATCAGAATCACTGCGGCATCCTGCAGGCCCTCGCCA  
GGAAAGGTGTTTACCTGGCGGAGCCGAACAACACCCAGCTCACCGAGACGATCCTCA  
TTCAAAATTCGCCGCTCAAGATGTCCGCTCATATGGCTGTGATAGAGGGCCTGATGGTG  
TTGTACGCGAAGGAAGTGGTGACGGGCGATCGAGTGGTGTGCGCGATCCGGCGTTTCG  
ATCCCCAGGCGGAGGTGGAGGTGCCGGGGGACCACGAGAAGGGCCTCCTCCTGTGGA  
TCAGTCACGCGTCGCACGCGCTCATCGCCAAGATCCAGGCGGAGGAGGGCGGCGGCG  
ACAAGACGCGGCTCCCAGAGCTGCCCGCTGCCAAGGATTTCCAATCGTTGTGCGACGG

CGTGGGCCTGGCAGCGGTCTGTCGCCTTCTACTGCCCCGGCGAGCTCAACTGGATGGAC  
ATCAGGGTGTCTGAAGAGACCCTCGGTGCGCGACGCGCTGCACAACCTTGTCTGCTGGTCC  
ACGCCTTTTGTAAACAGATGCTTACCCTATTCCATTTTCCACATGCAACCCGAGGACGTG  
ACGTACATGAGGGGGTCTATGAAGCAAAATTTAGTCGTTTTCTGGCGGACATGTACAA  
CGTGTTGGAGATCCATCCTGCGAAGTGTGTACGTTATCCGGGCGAGGAGAGGGCGATG  
CAGTTCTTAGATGCCTGCCCCGCGCAATAGTCATGGCGTAGCTCATAAAAGAAGTCTGCC  
ACAGTCTATAGCTCCGATACCTGATCTGAGAAGCAACCTCTCCGTATCCGCGCCAGGCT  
TCACAGTTGCAAAAGCATCGTCATCTTCCTCCGTCAAGAAGTCTCAATCATTACAACAA  
ACTGCCGAAAATTATTCTCACGACGACAGACGAGCGGGGAGCGAAGAAAGCTTCGTG  
GTCCATCGCGGAAAAGGCATTCTTACGTTAAGCTCCGTGGCGGACGAGAAATCCGTGA  
CCAGAGCGGACGCCGCTGGCCGGCCGAGCAACTGGGAAGATCAGAGGAGAAGCTCGT  
ACGCTGGCCGACGATCCAGGCGTAACAGCGTTTCGGACGACTCTCAGTTGACAATAGA  
GAACTTTGGCGGATCCCAGGATAATTTACACAACCTTCGGCAGAAATCCAGACAAGGAG  
GTCGGGGCGCACATCGGGAAAAGGAGCACACGAGCCGACGTTACCGGCGAGATCG  
AGCGTTCAGGACGTGTATGGTAGCGGGGTGCAGCACATTTTGTCTGGACAACGGATACG  
ACAAGGAAGAGCCGCCAAGATTGAGAAGGCAGACGTCCAACCTCGAGCTTGGACAAC  
GTCGCGCTCAAGCAAATTTTACATTCCAGCGAGAACGTCAATTCGGAAGGTGACACGT  
CCAAATTGGCCAGCTTCGCGAATCTGAGCAGGCAAAGCTCGGAGAAGGGGATCAACT  
TGACGTACACGGAACAGGATCGAGATGACGGGAAATCGAATATGTCCGGTAAGAAGTT  
TGGCCAGACGAATGGTAATGGGAACGGTAATGAGAAGAAGACTACGTTCCGCACTCTG  
CCGAACACGACCACGTGGCAACAGCAGAGCAGCCAGCAATCCCAACAGGTGGAACA  
ACATTCTGTTGATGAAAACGGTGGTAACACCATTATGGCCTCGCAACTGAATAACATTA  
GATTGAAGCTGGAGGAGAAACGTCCGCACATAGAGAACGAGAAGAGGAGGATGGAG  
GTCGTGATGTCGAAACAGCGTCAAAAAGTTGGCAAGGCTGCGTTCCTGCAAGCTGTC  
ACGAAG

>novel\_circ\_000246

AATCAAGAACACCTGAAGCCGCAGATCGTCCACGCACTTTCCAATGCGGAGCTGTACT  
GTTTGGCGCTGGCGAACATCTATTCCGATCCAAATTATCACAATCAGAATCACTGCGGC  
ATCCTGCAGGCCCTCGCCAGGAAAGGTGTTTACCTGGCGGAGCCGAACAACACCCAG  
CTCACCGAGACGATCCTCATTCAAAATTCGCCGCTCAAGATGTCCGCTCATATGGCTGT  
GATAGAGGGCCTGATGGTGTGTACGCGAAGGAAGTGGTGACGGGCGATCGAGTGGT  
GTCGGCGATCCGGCGTTTCGATCCCCAGGCGGAGGTGGAGGTGCCGGGGGACCACGA  
GAAGGGCCTCCTCCTGTGGATCAGTCACGCGTCGCACGCGCTCATCGCCAAGATCCAG  
GCGGAGGAGGGCGGCGGCGACAAGACGCGGCTCCCAGAGCTGCCCCGCTGCCAAGGA  
TTTCCAATCGTTGTGCGACGGCGTGGGCCTGGCAGCGGTCGTGCGCTTCTACTGCCCC  
GGCGAGCTCAACTGGATGGACATCAGGGTGTCTGAAGAGACCCTCGGTGCGCCGACGCG  
CTGCACAACCTTGTCTGCTGGTCCACGCCTTTTGTAAACAGATGCTTACCCTATTCCATTTT  
CACATGCAACCCGAGGACGTGACGTACATGAGGGGGTCTATGAAGCAAAATTTAGTCG  
TTTTCTGGCGGACATGTACAACGTGTTGGAGATCCATCCTGCGAAGTGTGTACGTTAT  
CCGGGCGAGGAGAGGGCGATGCAGTTCTTAGATG

>novel\_circ\_000248

GTGTATCAAATAGAAATACGTGATAGTGAAGGCGGCGAATTCACCGAGGCCGGCCGCGT

GGATTTTGGAGAAATCTGTGGACGGGGAAAATTTCCAGCCGTGGCAGTATTACGCGCC  
CAGCGACGAAGAATGTTGGACGCGTACTCCGTCCCTCCAGTGACGGGGAAACCCATT  
TTCATCGGTGACGACGACGTGATATGCCAGCGTCTATTCCAGACAGACACCTATGGA  
AAACGGAGAGATCCATACCCATCTGGTGAACGGTAGACCCGGTGCCCTGAATCACAGC  
ACGACCCTACAGGAATTCACGCAGGCGAGATACGTGCGGCTTCGTCTTCAGGGTGTTT  
GACGTAACGGGGAGACGATCGGTGACAAAAGGCGCGCTTTCTACTCGATAAAGGAGA  
TCAACGTCGGCGGAAGGTGCCTGTGTTCCGGCCACGCTGGCAGATGTCGCTACAGCGT  
CCAACACGGG

>novel\_circ\_000249

AGCACACTTGCAAGGACTTCCGATGCACCCAGAACGAATTTTGCATCGAGAGGGATCT  
CCTTTGTGACGGCGTGAATCACTGCGGCGACGAGTCCGACGAGGCTACCTCCACCCTC  
TGTGCCAATTCCGAGGCATCGACGATCCTGGGTATGCAGACGATCTGGTTCGTGATCGC  
GCTGGTTTTCTTATCCTGAGCGTGGCAGGCCCTGGTCACGGCGGCGGTCTCTGCTTCT  
GCAGGCAGCGTGCAGCAACCCCCAGGCACCCCCACAACGCGCACAACGCCCAGACTC  
ATCCTCCGGTCAGCTTCCCAT

>novel\_circ\_000251

GCGATCCATTACAACTTGGACCAGTTGTACAAAGTGGAATAGCAAAAAATTTTGGTTTA  
GACGAGTCATTTTTATTGAGATTATTACGTCATTTTCCTTATCAAAGAGATCCTAATGGAT  
TTGAAACACATTACGATCCTCGACTTGTTACAAAACCTTATTGTAAATTATCGAAGTTTAC  
CAGAAATACTCGAATTATCAAGTTCATTATTTTATGATTCTGAATTAAGCACAGATAT  
CTTCTAAAAAAAGTAAAGAAGCAAACTTTTACAAACATTAGCTTCTGAATTGCCAAA  
AAGAAAAGGTATTCCACCAGCTATAGTTTTTTCATGGTGTAATGGTGAAAATTGTAAAG  
ATAACGATAGTCCAAGTTGGTATAATCCTGAAGAAGCAACTCAAGTATATCTTTATTTGT  
TAAATTATATAAATGCGGTCTTTACCTGATGATATTGGAATTATAACTCCTTATCAAAA  
ACAGGTTCTTCAAATTCGTGAATTACTCATGGAATTAAATATAGAATTACCAAAAATTAG  
TAGCGTTGAAGGATTTCAAGGTCAAGAGCGCAATGTTATCATTATTTTCAGCT

>novel\_circ\_000252

GAGCAGATAGCGAAAGAGAAGCAGGTGACGGGCAGGATACAGATACAAGTCTCGTAC  
GAGGCGGATCGCAAGGAGCTGATCGTCTCAGTTTTTCATGGCGGACGACTTGTGCGCAA  
GGGAGGACACCGGATACGGCACGTTACCGGAGGCGTATGCCAAATTGGCCCTGGTTCC  
GATCGGCGCCGATCAAATTACATTGAAAACGGTGGTCGCGGAGCCAAGTCAAAAGCC  
AATTTGGAATGCAACGTTGCTTTTTCTCCGGGGTTGACGGGGAGAGCTTAATGAAGCGG  
GCAATCGAGGTGACCCTGTGGGATTTCTGCCCCGACGGCGATAACGTTTTTCTCGGCG  
AGTGCACCGTCGATTTGGAACGGGCCCTCGAAAACGACAGGGCAGTTTGGTATCGACT  
GGAGGACCCCCGTGGGCTTCGCGCGAGCAAATCGCCCTACTGTTCCCCCGAGGCTCG  
CTCTCCATGGAAATTGCCCAAAGGTTACTGCGAAAGACGGAGCTGCGCGAAAGAAGT  
TACAGCGACGACACGCAAAGCGACAGCGGAAGTCCGGAGCTCTGTTTTCTCCACCCG  
GATCACGCTTGGCACGCGAATTCGAGAAGAGGCTCCAGCCAATCCGAGCAGCTAGAA  
GTCGAACCGTACGAGCTTAACAGGGATTACAGTAGATCCTTGCCGGGCAGCCGAAGGA  
GCAGTTTCCAGAGCCAAGGTGGCACGGACAGTAAACGCGGAAGTATGGGGGAGACGG  
AGATGCCGACGATACACTTCAACCGTGATCGGCGACGGAGCTCGTTACCAGGCCGAT

GAGGGACCCGGAGGAGATTCTCGAGGGTCTACGATCGTTGAAAGCGGCCAAGAGGGA  
GCTTGGCAGGACGATGAGTCTCTCGGGAGACAAAAGGCGCGAGAGCC

>novel\_circ\_000253

ATTTACGATAATTTAATTATATTTAACGTATCAACGAATCTTTATACATTTTATTTAACAAC  
TTTCTAACAAAATTTTAGCCGCTAGTTTTTGAACGATATTCCACAAATAATAATGCATATT  
AATAATTTATTTATTAGTTATTATATGTAAGATGTGATTCCCTTAGATGTTGGATCACTCCAG  
GTTTTTTATTCTTTATTCGTCATATTTCG

>novel\_circ\_000254

GAAGATTTAAATGAGAACAACACGATGATCGTACACCCGTGCAACTGTAGCACGTTCT  
TCGTGTGCACCACGGATCCACCAATTCCCATGGATTGCCCCGGCTGGTCTTCAATTCGAC  
GAGAAGAAACAAGTTTGCGACTTCAAATGGCGCGTGAAATGCAAACCGAGAAAGGAA  
TGCCCCG

>novel\_circ\_000256

ATGACATTGTAGGGGTTTCATTGCACTCACGGTGTAATCGTTCCGGATACCTAATTTGTA  
GGTATCTCGTACAGCAATTAGGTTGGGAGCTGGAGAATTGTTTAAAGCGTTCGAAAC  
GGCCCGTGGATATCCCATCGATCGTAAAATCTATATAAACGCGTTGCAGAAAGTGCCGC  
GCGAGAAGATCGACACGAGCAAAATCAGCGTGGATTTCGAGGGGTACGGCAGGATCGG  
AGGCGGCCAATAGTAGAAGAGTGATGCGCGTGTCTGTTCAAGTATCCAGGGGGCAGCCC  
GTACACGATGGGTCCGCCAGGTTTCGGAGCAACGAGACGCGGTTTCGCGAAAGACGG  
TCCATTTTACC GGCGCATTTTCGGTTACGCCGGCCCTCCGCCAGGTTTCCGTCTCTATGC  
CACCTCCGCCCGGCATGCCACCGGTACCACCGCCACCAGTTCTCTCACCTATGTACGG  
GCCGAGGCCGTTTCAG

>novel\_circ\_000257

GCATGTACACCATGCGCATGCTAGATAATGGTAATAACAACGCTTCTGGTCCAACGGGA  
GCAGCAGCCTTGTCAGGAGTTCAGACAGCTGGTGGTACAACCTCTTCGGCAACAGGA  
GTTACGACACTTCCGGGTGTAACGGATGAAAGGATGGATGCATCGAGCGATAGTGCTG  
TCAGCAGTATGGGCAGCGAACGTGTACCATCCCTTTCGGATGGCGAGTGGATGGAAAC  
TGGATCTAATTCCAGCCATACACAAGCGGATTCTCATTACACTATGGATTATGCTAGCAA  
ATACCGCATGTCTGACGATTGTAGCTATTCCGTTTCCGGAAGAAATGCTGGCTCTCCGA  
GATGTCAAACGGAACGTACGATGCCTCCGTTGCTCAGAAAAAGCATCAAATGTTTGC  
AAAACGATATTTTCAGGAACAAGGAACTGGTTTCGCCACTCGGAGCTACAGCGCATCCG  
ACAACTCCAATGAAATACGAATATGATTCTCATACAGTTGGTGCTGGAGCACCTGGAAA  
TGCTTATTCCGGACCGATCGAGGGCGCAACTGGACCTCAACCTGAAATAAAATATAGTT  
GTAGTGTAGATTTTCAGTCGGCATCAATCAGGACGTTTCAGCTATAGAACATGTTTCATCATA  
ATCATACGTATCATTTACCTGCAGAAAGTTCTGGATCTCTTCAGCGTCCAGTTTCTCGTG  
ATAAAAAAG

>novel\_circ\_000258

GGTCGCATGCCATTCATGCGTGCAATGAGCATGGAACAACGGTGGCAAGATCTGGCAT  
CTCTTTTATCGCTACCTGGTGCACCAGAACATTTTCCACATACACATCCTGGATACCCAG

GGCACGGTATAAGCCACAGTCATTATGAAGCACAACGTAACGTGTTGCTTCACAATGC  
CACTCTGGCTCCACCGGTGGGTGATCTTAATTCGACCAGTCCTTACCACAATGTAGGTG  
GATCGTCGAATTTGGGCTCGGCTGTAGCAACGTCGATGAATTTAACGAATAGTAGCGAA  
CCGATGGGTGCGGAAAGTGGAGCAGCTTATAAATCCGAGCCGGCAGATATGATGTACTA  
TCACACACCAACATCCGATTCGATAAATCAAACCTACCGATGGTTTTCTTTCGTCTCTACT  
TAACGACGAGGATTTACATCTGATGGACATGGCTATGAACGATG

>novel\_circ\_000259

ACACACACATGAATGACGTGCAGCAGTTTGTCTGTTAAGCCTCATTACAGAGCATCGA  
ACAACAATATCAAGCTACTTCAGAATGTTGGAATCTGGTTGTGGACGAAGGTTTGTTAC  
AGGTATATATATACATATACATATACATATATTTCTCGTACATCAAGGATAATTATATTATAT  
AATGAGATAAAAGACGTAAAAGAAAAATATCAATTTACGAAGGAATTAACGAATTCG  
AAGCTGGAAAAGTAGTTTGTCTATGGTTAAATTATCTGTAACGAAGGTAGATGCTACT  
CGTTATTTTGCATATGCGCTTATTACATATAATAGGATAATTTTCGAAAGTATCGAACGT  
TATTCTTATCGACGTTATTATTTTTTTTTTCTACGACACAACGGTAATTATAACGCAATAT  
CTCTATCTGAAATAATCAATGTTACACCGCGTTGACCACGCATCGCGCTTTTTATTTTAA  
CAAAAAACACCCCGTTTCTACTCTAATCCTTCTTCTTTCCATATCTACAATCTCTACGTAT  
AAAACACACGAACACGCGTACACGTTACGTTTCGATGAAAGAGAAGGAAGAAAGTTTCG  
GTTTCGGGAAGATCGGTAAGAAAGAGAAAAAAGACGTATATGTAGCGATGTGCGGACCT  
TGCCTCTAATATGGAAGCGGATAATTGGTATACGGATACGTATAATAGCGTCGAACAGCG  
TCCACAGGACTCTCAATACGTAATGAGCGAAGTAAATTAATACATATGTGCAATACGGG  
CGGGTGGCTTTTGCCCAAGAGAGAAGGATGCGCGTATTGTACGAAGGGATTGCGCAAC  
GAGACACGAGTGTGCGCGTACGCGAACCGTATCATTTTTGGAACCTTCTCTCACGCG  
ACCGTCGTATTAACACTGACCTCACTCACCTGTAATTGCTACTTGTTAGCAACCGTACC  
ACCAAGACGCGGGGCGACGTATGTAATACCCGGCCTATTATACCATAGCCACGCTATGC  
TCTTACGTCTATCGTCGGATTTTTATTCCCCGCCAAGGAACAGCCTTGAACGTGTGCGG  
CCACCATCGAAGGAATCGGCTGTATTCCGCGATTCCATTCCACTCCGTTTTAGTATTATT  
CCTAATGGCGTACTTTGTTCTCGATAACGCCAAATTTAAATAATTATCGCCAAATGAATG  
CGATCCAACGTAATACCGTGGAAGAAAAAGAAATATCTAAACGCGAAGATGCGTTTAGA  
TATACCTCGTTTCGATACCAGACAATTCTACGAATTTTAGATATATTTTTCTTTCCATCGA  
GTTTTTCTAACTTCTTCTCCGCGTAGGTTCCATCTTTTTCGCTTGGAAGGGCTTGAA  
AATTTCCGCAGTTTTGACCCTACGCTACTTAAAAATTTGAAATCGTAATTAAGCCACCA  
ATCTTTATTACTCGTCGCTTATCCTTCTTACTTATCTTAATCGTCTTTGTACTAATTTAACC  
GCGTTTAAACCGGTTTAAACATCATCGTCGATAACATTGCACTATAAATTTGATATCGATA  
TCGTAAAACTATCGTTAAGTATGCCGGATGAAAATCTTTATTTCTTCGCTTTCCTATCGA  
AAGAACAAACGCATTTTCGTTAGAATCGTTCGATTTATTCAATGATCGATTTATTCGAAA  
GATGGAAATTGTGGGGAAGATAGTGTACGAGGTAGAGATAAAGATTAAAGATAATTTG  
GTAATAATAAAAATGTAAGGAATAATAAAATGTTTGAATTATGCGCGATAATAAAAAAGT  
TGGTCTGGCTGTATATATCGAGCGGGTTTGAAAAGAATAGAGAATAATTAATAAAAA  
GGAGGATGGTATGGCGCGCTCTGTTTCGCGGATAACGAACGAGAAAAAAAACGAGAAA  
GGAGTGGAGGAAGAGTTCCGCGCGAGAGAACGAGAGAAGCAGGCTGAGCGCATCAG  
AATGTAATAGTAATTACAGCCGCAACGTTTATCCTGCGGTGCTGATTACATAGTTGGAAG  
GATTAGTAATGCAAAACAATTTAATCTCCGCGCTAATAAGTTCAAAAGACGGTGATTTCG  
CTCAATGTCGAAATTTTAAATACGCGCGCTTCTCGCAAATACGACAAATATTTTTCTTTC

TTCTTTTTTTTTTTTTTCTTTTTACACGAGTATCCTTAGAAGTATCCTAGATTTTCAGGATT  
TTTCACAAATTTTCATTCGTTGGAATTCTTAAAGAGAACGATATAAAAAATGGATTTTGTG  
ATTTTGATTTGATTTTCGGTTCAAGGATCAAAAGATAATTTCGATCTCGCGGAAGAAAAT  
TTTCGAAGGAGATTTGATTCGAGAAAATGAACTCGTAAATGAGATGATAAATCACCTTA  
TTTTAATAATTGAATTAAGCTTAATATTTTTCTTTTTTTTTCTTTCTTGAGTATCTTAGAAT  
CCTAGATTTTCAGGATTTTTCACAAATTTAATTCCTTGGAATCTTAAAGAGAACGATATA  
AAAATGGATTTTGTGATTTTGATCCGATTTTCGATCCAAGAATCAAAAGATAATTGCGA  
TGGTGAACGCGATCTTGCGGAAGAAAATTTTCGATTTCGAGAAAATGAACTCGTAAAT  
GAGATGATAAATCATCTTATAATCCATAGCTCCCCGTTTTAATAATTGAATATCAGAAGA  
AAAAGATGCAAGATCGACCGAACGCAGCTTAATATTTTTCTTTTTTACATGAGTATCTTAG  
AAGTATTCTAGATTTTCAGATATTCATTCGTTGGAATCTTAAAGAGAACGATGCAATGG  
CGTAACGCGATCTCGCGGAAGAAAATTTTCAAAGAAAAATTTGATTCGAGAAAATGAA  
CTCGTAAAAAAGATGATAAATCACCTTATTTTAATAATTGAATATCAGAAGAAAAAGAG  
CAAGCTCGACCGATCGCATCTTTGAATTTTCGTCCGCATTTTCGTAATAAAGTCGAGCGG  
GTATCGATCAATATCGAAGGACGATCTTTGGCCGTGATTGACGGACATTGGTTACGTCC  
ATTGCACTTCTGATATTTGTTTAAATACGTTGAGTTGTAAAAAGAAAAAAGAAGAA  
GAAGAAGAAGAAGCAAGAAGAAGCAAGAAGCAATCCGAGTATCCTTGGACTTTCGAT  
AATATTTACACGCAACATCGAGTTACGATTGAAAAGAGAGAAGAAAGCGATGCGCGGA  
GATAAAGAGATGGGGATGGAGATGAAATAAGGGGAATGAAGGAACGGGAAGAAGGA  
ACGGGAAGATCGTGAGAGAGGGGCGATCCTCGGGAAGCCGCGGAGGCTGGAGGGAAG  
GCGGAGGTTGGATCGCGTTGGATCGCGAGCGAGAAGAGTCGAGTAAGACGAAATTAAT  
AAGAGGAACGAAGTATGTAATATGGAAATGAGAGGCCGGGGGAAAGACTGAGACCGA  
CCGAGACATTAGGATGCACTTGTAACGATACTCGAAGGACTCGCCGCGAGCCCCGCCG  
GGTAACCCGTGCCAGTGGTGCATTAATCTGATGCCTATCTGAATGAATCATAATTAATAT  
CTTGGCCCATTAGCCATCACGGTGCACCGCCGCACTGTATAGGTAATGCGCATACTTTCT  
CCGCGTATCTTTAATTACTTGATTTTCTCCGTAATATTCCTCGCCGCGAGATTATTGTATT  
CGGTTAACCAATCCATTTTTCCATTTAAATTTACCACTCCAAATGTATAATTTCAAAGA  
GATTCGTCTCCACGAATTTTCTTGCGAGACAATTTTTCTATTTCTCTCTCTCTTTGT  
TTCGACGATTTTATAAAGAAAATCCAGTTTTTAGAGTAACCAATCCATTTTTTTCATTTAA  
ATTTACCGCTCCAAATGTATAATTTTCGAAAGAGATTTCGTCTCCACGAATTTTCCTTGCG  
AGACAATTTTTCTATTTCTCTCTCTCTTTGTTTCGACGATTTTATAAAGAAAATCCAG  
TTTTTAGAGTAACCAATCCATTTTCCATTTAAATTTACCGCTCCAGATATACATTCGAGT  
AGAAAAATATTTAATTTTCTCGTCCTCTACGAATCTTCCTTGCGAGACAATTATTTTCG  
TCTATTTCTCTCTCTCTCTTTGTTTCGACGATTTTATAAAGAAAATCCAGTTTTTAGAGTA  
ACCAATCCATTTTTCCATTTAAATTTACCGCTCCAAATGTATAACATTCGAGTAGAAAAAT  
ATTTAATTTTTCTCGTCCTCTACGAATCTTCCTTGCGAATTATTTTCGTCTATTTCTCTCTC  
TCTCTTTGTTTCGACGATTTTATAAAGAAAATCCAGTTTTTAGAGTAACCAATCCATTTT  
TCCATTTAAATTTACCGCTCCAGATATACATTCGAGTAGAAAAATATTTAATTTTTCTCGT  
CCTCTACGAATCTTCCTTGCGAGACAATTATTTTCGTCTATTTCTCTCTCTCTCTTTGT  
TTCGACGATTTTATAAAGAAAATCCAGTTTTTAGAGTATTCTCAAGGCACGTACGATCA  
AGCAATTTTCACGAAGAACGAAGCGACGCGACGGGGCGTCACAATTCCTTTCCGTTTCG  
TCGGGGAGATTCCAAACAGCTGGTGGACTTATGCACTGTGAAATACATAATGCGTCGC  
GGTATGAGCTATCTAAGATGTGTGAAACGAATTTACCTCTTTGCGAAGCGATCATCAAA  
CTTCTCCGTCAGCTTACTGTAAACAGTAAATACAATAATGCGATAATCTTTGAAACGCG

AATGTAATTAATTACAATTTTCGATCCTCTCCGTTTCTATTTGCGTTGCGTTATATGTACTTT  
CCTCGACGAATGACGCTTATCTTGAGAAATTTCAATCACCGTAAAATATAAATATCTATAT  
CGTGTGCGTCGTATTAGTTTTTGGTTAACGAATGAATTTAATCCGCGATCCGTATGCGGT  
AAACGTAAACAATTTCAAATATATATATATATATATATATGAGAAGAAACGAGGGATAC  
GAGAGACAAAATATTTTTTTATAGGCTGTAAAGTGTGAGGGATTGAATCGGTATCCGTG  
GATATTTTGATTCACAACCTTTTCGTGACAGAAACGAGCTTTACCGGCAGTCACGTACGAA  
AACACGAACGATGCGCCGAGGTAAAAAGTAGGTAAGCGATCGAGGATCGAAGGGACG  
TTCGTAGAGTAAACGATGCTGGCAGGTATCGAATACCCGGTTGATCGCTGTCTGACTTC  
TCGATCAATTGCATTCGCATCGATGTGTACAAATGTATTGGAAAATTTAGAGAGGAAGA  
AGAGATGCGAAATAAAAATTATTAATCGAAGAGATTTTGAAGGATTTGGAAAGAGAGG  
AGGATTTTTAGAAAGAGGGAAAAGGATAAATATTCTTCTTAAGAATACGCGAATCCAAGA  
TTCCGATTTATTATTGCGACGATAATAGTTGGCAAAAAGATGAAAAGCGTGGTAAAGAT  
AGAAGTGGAAGAAAAGAAAGGGGAGGAAAGAGGAATGGAAAACAGATATAAACCGGA  
CAAAGGAAGAAGGAAGAGAGAGCTCGGTTAGAAACTGGCAAGTCCTCGACAGCTCG  
TTTCAAACATCTGTTTCGCTCCGAGAGATCTCTTTCCTCCAGTCCCGCGATCTCGCAA  
TTCATACGGCCTGTGACGCGAGCCAACATCGTATACGCCTTCGCGCGCGCGCATATTAC  
GTGTATATGTGTTATACGTTTTTTCGAATTTCTCCGATGCGCGGGGAAGAAAGAGCGGTG  
ATCCAAAAATCGGAACCGTAACCAAACGGTACGCGGTGGATAATGTGGATAGAGAGCT  
GGTGGGAAAATGATTGGTGGAAAGTGCAAGAACCGGGGAATGGAAATAACCGAGATC  
TCCAAAACGTGTGTATAGCGGAAAGACCATGAGAAATTGTTTTAGCACGGTGAACCTGGC  
AACTGGTGTGCGCGTCAAATTCCGAGAAGCGTTCTTGAAACGGTATAAACGCGCCGA  
GTTTTTTTTCCCGTCCACGGGGCTCAATCATGAGCGTTGCATCGAAACGGCGAACGAG  
CGTAAAGTTGCGCGCCATTAGAAATCCGCGATTCGGTATATGGAGGACAAATGGTCGCG  
GAACAAACGTCTCGTCCTACATTTGGCGGCCTACACAGCCGACAGATGCGGTGACAAG  
CGAGAATCACCTTAAAGGCGTCGCGCTCCACAGATTGCACCGACCGCTGATTGATGCG  
AGCGAGCAACAATCGCAAGCCAGTTTCTCTATTTCATCTTCTTCTTGCCTCCATGCATTA  
GCGACAATGCTAACCTGCATTAAGCGCCACTGACCACTACCGCACTTACGCGTGTACTC  
CTTTCCTCCTCTCTCCTAACCTGCCCCTTCTTTCCACCATTTTATCATTTCAACACTTG  
CGTAGATTTATGGCCTTGAATATTAGAGCGAATCTTGTTGATAGCGAGTTTGATAACGCT  
TCGTATACGTTTTTTAGATCGTTATCCGTGTAAATTCGATCGAAACGATCTACTACTCGAT  
CTACCTCGATTCCATTATTGACCAAATCTTTATTGATAAACGCTCTTGTAATAATCAAC  
GATCGTGTGCGCGTACGCTTGGTTGAAAGAGTTCGCGTCGTTTTCGCTGTTTGAATAA  
AAATTATTCTCTCCGATATAATTTCCATATTCGACGCCCAGTTTGACGTTTGATCATGATC  
AACGCGTTCTTCTACACGGTTCAAAGGATACTCGTGACACGCTTGATACCAAATCAT  
TAATATCTCGACCGTCCTTACGTGTGGCCAACACCTACGCGATCAGCAGGGTTTCCGAC  
GATCCATCCAACGAGTCGAGATTTGACAGGTTTCGATAACCGCGGCATTCTGTAGACGT  
GACACTGGATAGATATCTTATAACGAAGCAAGAAAGAAAAAGGATCGTAATTGTAAAG  
ATAGGTAGATTTTATTTTATCGATTGGTAGAAAATAAAAATTGAAACATGTTTCGGAATGGC  
AGATTCGGAATAAAATTATTAATAATTTAAACGTTAGGAAAAGTTTGTGTTAATCCGTATA  
ATTTATACATATTTACAGGGTCGCATGCCATTCATGCGTGCAATGAGCATGGAACAACGGT  
GGCAAGATCTGGCATCTCTTTTATCGCTACCTGGTGCACCAGAACATTTTCCACATACA  
CATCCTGGATACCCAGGGCACGGTATAAGCCACAGTCATTATGAAGCACAACGTAACGT  
GTTGCTTCACAATGCCACTCTGGCTCCACCGGTGGGTGATCTTAATTCGACCAGTCCTT  
ACCACAATGTAGGTGGATCGTCGAATTTGGGCTCGGCTGTAGCAACGTCGATGAATTA

ACGAATAGTAGCGAACCGATGGGTGCGGAAAGTGGAGCAGCTTATAAATCCGAGCCGG  
CAGATATGATGTACTATCACACACCAACATCCGATTCGATAAATCAAACCTACCGATGGTT  
TTCTTTCGTCTCTACTTAACGACGAGGATTTACATCTGATGGACATGGCTATGAACGATG

>novel\_circ\_000260

TTTCCAGTTGGCGGAGGAGGTTGTTTTGGTAGGCTGGCAGGTTACGCGCGGTGATCGT  
AAAAGCCGGCGTGGTCTCGCTCGCTCGCCGCGAGAAAAGTCATGTTTCGTTAGCCGAG  
GAGGAGGACGATCGTGACAATGACCTACCGAGATACATAGTCCTCGGACGAGGAGCGC  
GAGGCTCGCAAAACGTGACGCAATGCGTGGTTGCATGCACGTGAATAAGCGTAGCTGA  
AAACTGCCGCCAATCAGAGAACACGGGGACCCCTACCATGATCGTTACCGTGCACGA  
TCGTGATCGCGTTGTATTCCTGCCACTCGCGGACGACATGCGGCTCGAGGTAAACGTTA  
AACCTTGTGGAAAATTAGTTTGCCGTTTTTCCATCGCGTTGAAAAACGCTTTGTCCCGT  
TAAGTCGTTACGCCAATGTCCCGGGATAAATGCTTCGTTTCGATAAAACGTGATTGTGC  
GACTTGGAAAAGTGTTTGTGTTTCTCTACCCTCTCTCGTCTACCCGCTGATCGTCAATTT  
CCTTCAGGGGGGAGGGGAGGAAAAAAGAAAAAGAGAGAAAAAAATTGAGCGGA  
ATGTGTGATTCGGTACGCGTTTATCCTCTCGTGGGATAGATAGTTTCTTCGCATTTTTTTT  
TTCTTTCCTCTTTCCTTTTTTTATTTTTTAAGAAATAAGAATAAAATGATTCGCGGCAGAA  
GGACGTTATTATCGTTGCTCGTCTAAGGACAATTATCTCGATATTCCGAGTATCGCGAGT  
TTCGTAAAAGTGCGCGTTTCTCGTGTATTTCGATCTTGTTATTTTTTAATACAGCGACGAT  
GATCGATCTTATTTTCGCGCGGTGGCAAACGTTCCGTACGATCGTACGTCTCGTATCGA  
CGAGTGGCGTTTGTTTTTGATCAACTTTACATCCCCGCGAATCCTTTGATCCGTTTCGAG  
GAAAATTGAAGGAAGAACGCAGAGAGAGTCGAGTCGATTTTTTTTTTCCTTTTTTTTTTT  
TCGTTGTGTGTCAAATCGTATTCCGATAATACACAAATACGTCGAGCGAATGAATATATT  
GGTTAATAGACACACACATGAATGACGTGCAGCAGTTTGTGCTTAAGCCTCATTACAG  
AGCATCGAACAACAATATCAAGCTACTTCAGAATGTTGGAATCTGGTTGTGGACGAAG  
GTTTGTTACAGGTATATATATACATATACATATATATTCTCGTACATCAAGGATAATT  
ATATTATATAATGAGATAAAAGACGTAAAAGAAAAATATCAATTTACGAAGGAATTAAA  
CGAATTCGAAGCTGGAAAAGTAGTTTGTCTATGGTTAAATTATCTGTAACGAAGGTAG  
ATGCTACTCGCTTATTTTGCATATGCGCTTATTACATATAATAGGATAATTTTCGAAAGTAT  
CGAACGTTATTCTTATCGACGTTATTATTTTTTTTTTCTACGACACAACGGTAATTATAA  
CGCAATATCTCTATCTGAAATAATCAATGTTACACCGCGTTGACCACGCATCGCGCTTTT  
TATTTTACAAAAAACACCCCGTTTCTACTCTAATCCTTCTTCTTCCATATCTACAATCT  
CTACGTATAAAACACACGAACACGCGTACACGTTACGTTTCGATGAAAGAGAAGGAAG  
AAAGTTCGGTTCGGGAAGATCGGTAAGAAAGAGAAAAAAGACGTATATGTAGCGATGT  
CGCGACCTTGCCCTCTAATATGGAAGCGGATAATTGGTATACGGATACGTATAATAGCGTC  
GAACAGCGTCCACAGGACTCTCAATACGTAATGAGCGAAGTAAATTAATACATATGTGC  
AATACGGGCGGGTGGCTTTTGCCCAAGAGAGAAGGATGCGCGTATTGTACGAAGGGAT  
TGCGCAACGAGACACGAGTGTGCGCGTACGCGAACCGTATCATTTTTGGAACCTCTTCT  
CTCACGCGACCGTCGTATTAACACTGACCTCACTCACCTGTAATTGCTACTTGTTAGCA  
ACCGTACCACCAAGACGCGGGGCGACGTATGTAATACCCGGCCTATTATACCATAGCCA  
CGCTATGCTCTTACGTCTATCGTCGATTTTTATTCCCCGCCAAGGAACAGCCTTGAAC  
GTGTCGCGCCACCATCGAAGGAATCGGCTGTATTCCGCGATTCCATTCCACTCCGTTTT  
AGTATTATTCCTAATGGCGTACTTTGTTCTCGATAACGCCAAATTTAAATAATTATCGCCA  
AATGAATGCGATCCAACGTAATACCGTGGAAAAAAGAAATATCTAAACGCGAAGATG



CGTTTAGATATACCTCGTTTCGATACCAGACAATTCTACGAATTTTAGATATATTTTTCTT  
TCCATCGAGTTTTTCTAACTTCTTCTCCGCGTAGGTTTCCATCTTTTTTCGCTTGGAAAAG  
GCTTGAAAATTTCCGCAGTTTTGACCCTACGCTACTTAAAAATTTGAAATCGTAATTAA  
GCCACCAATCTTTATTACTCGTCGCTTATCCTTCTTACTTATCTTAATCGTCTTTGTACTAA  
TTTAACCGCGTTTTAAACCGGTTTTAAACATCATCGTCGATAACATTGCACTATAAATTTGA  
TATCGATATCGTAAAACTATCGTTAAGTATGCCGGATGAAAATCTTTATTTCTTCGCTTTC  
CTATCGAAAGAACAACGCATTTTCGTTAGAATCGTTCGATTTATTCAATGATCGATTTA  
TTCGAAAGATGGAAATTGTGGGAAGATAGTGTACGAGGTAGAGATAAAGATTAAAGA  
TAATTTGGTAATAATAAAAATGTAAGGAATAATAAAAATGTTTGAATTATGCGCGATAATA  
AAAAAGTTGGTCTGGCTGTATATATCGAGCGGGTTTGAAAAGAATAGAGAATAATTA  
AATAAAAGGAGGATGGTATGGCGCGCTCTGTTTCGCGGATAACGAACGAGAAAAA  
CGAGAAAGGAGTGGAGGAAGAGTTCCGCGCGAGAGAACGAGAGAAGCAGGCTGAGC  
GCATCAGAATGTAATAGTAATTACAGCCGCAACGTTTATCCTGCGGTGCTGATTACATAG  
TTGGAAGGATTAGTAATGCAAAACAATTTAATCTCCGCGCTAATAAGTTCAAAGACGG  
TGATTGCTCAATGTCGAAATTTTAAATACGCGCGCTTCTCGCAAATACGACAAATATTT  
TTCTTCTTCTTTTTTTTTTTTTTTTTCTTTTTACACGAGTATCCTTAGAAGTATCCTAGATTT  
AGGATTTTTACAAATTTCAATTCGTTGGAATTCCTAAAGAGAACGATATAAAAATGGATT  
TTGTTGATTTTGATTTGATTTTCGGTTCAAGGATCAAAAGATAATTCGATCTCGCGGAAG  
AAAATTTTCGAAGGAGATTTGATTGAGAAAATGAACTCGTAAATGAGATGATAAATCA  
CCTTATTTTAATAATTGAATTAAGCTTAATATTTTTCTTTTTTTTTCTTTCTTGAGTATCTT  
AGAATCCTAGATTTTCAGGATTTTTCACAAATTTAATTCCTTGGAATCTTAAAGAGAAC  
GATATAAAAATGGATTTTGTTGATTTTGATCCGATTTTCGATCCAAGAATCAAAGATAA  
TTGCGATGGTGGAACGCGATCTTGCGGAAGAAAATTTTCGATTCGAGAAAATGAACTC  
GTAAATGAGATGATAAATCATCTTATAATCCATAGCTCCCCGTTTTAATAATTGAATATCA  
GAAGAAAAAGATGCAAGATCGACCGAACGCAGCTTAATATTTTTCTTTTTACATGAGTA  
TCTTAGAAGTATTCTAGATTTTCAGATATTCATTCGTTGGAAATCTTAAAGAGAACGATGC  
AATGGCGTAACGCGATCTCGCGGAAGAAAATTTTCAAAGAAAAATTTGATTCGAGAAA  
ATGAACTCGTAAAAAAGATGATAAATCACCTTATTTTAATAATTGAATATCAGAAGAAA  
AAGAGCAAGCTCGACCGATCGCATCTTTTGAATTTTCGTCCGCATTTTCGTAATAAAGTCG  
AGCGGGTATCGATCAATATCGAAGGACGATCTTTGGCCGTGATTGACGGACATTGGTTA  
CGTCCATTGCACTTCTGATATTTGTTTAAATACGTTGAGTTGTAAAAAGAAAAAAGA  
AGAAGAAGAAGAAGAAGCAAGAAGAAGCAAGAAGCAATCCGAGTATCCTTGGACTTT  
CGATAATATTTACACGCAACATCGAGTTACGATTGAAAAGAGAGAAGAAAGCGATGCG  
CGGAGATAAAGAGATGGGGATGGAGATGAAATAAGGGGAATGAAGGAACGGGAAGA  
AGGAACGGGAAGATCGTGAGAGAGGGCGATCCTCGGGAAGCCGCGGAGGCTGGAGG  
GAAGGCGGAGGTTGGATCGCGTTGGATCGCGAGCGAGAAGAGTCGAGTAAGACGAAA  
TTAATAAGAGGAACGAAGTATGTAATATGGAAATGAGAGGCCGGGGAAAGACTGAG  
ACCGACCGAGACATTAGGATGCACTTGTAACGATACTCGAAGGACTCGCCGCGAGCCC  
GCCGCGGTAACCCGTGCCAGTGGTGCATTAATCTGATGCCTATCTGAATGAATCATAATT  
AATATCTTGGCCCATTAGCCATCACGGTGCACCGCCGCACTGTATAGGTAATGCGCATAC  
TTTCTCCGCGTATCTTTAATTACTTGATTTTCTCCGTAATATTCCTCGCCGCGAGATTATT  
GTATTCGGTTAACCAATCCATTTTCCATTTAAATTTACCACTCCAAATGTATAATTTCAA  
AAGAGATTTCGTCTCCACGAATTTTCCTTGCGAGACAATTTTCTATTTCTCTCTCTC  
TTTGTTCGACGATTTTATAAAGAAAATCCAGTTTTTAGAGTAACCAATCCATTTTTCA

TTTAAATTTACCGCTCCAAATGTATAATTTTCGAAAGAGATTTCGTCCTCCACGAATTTTCC  
TTGCGAGACAATTTTTCTATTTCTCTCTCTCTCTTTGTTTCGACGATTTTATAAAGAAAAT  
CCAGTTTTTAGAGTAACCAATCCATTTTCCATTTAAATTTACCGCTCCAGATATACATTC  
GAGTAGAAAAATATTTAATTTTTCTCGTCCTCTACGAATCTTCCTTGCGAGACAATTATT  
TTCGTCTATTTCTCTCTCTCTCTTTGTTTCGACGATTTTATAAAGAAAATCCAGTTTTTAG  
AGTAACCAATCCATTTTCCATTTAAATTTACCGCTCCAAATGTATACATTCGAGTAGAA  
AAATATTTAATTTTTCTCGTCCTCTACGAATCTTCCTTGCGAATTATTTTCGTCTATTTCTC  
TCTCTCTCTTTGTTTCGACGATTTTATAAAGAAAATCCAGTTTTTAGAGTAACCAATCCA  
TTTTTCCATTTAAATTTACCGCTCCAGATATACATTCGAGTAGAAAAATATTTAATTTTTTC  
TCGTCTCTACGAATCTTCCTTGCGAGACAATTATTTTCGTCTATTTCTCTCTCTCTCTCT  
TTGTTTCGACGATTTTATAAAGAAAATCCAGTTTTTAGAGTATTCTCAAGGCACGTACGA  
TCAAGCAATTTTCACGAAGAACGAAGCGACGCGACGGGGCGTCACAATTCCTTTCCGT  
TCGTCTGGGAGATTCCAAACAGCTGGTGGACTTATGCACTGTGAAATACATAATGCGTC  
GCGGTATGAGCTATCTAAGATGTGTGAAACGAATTTACCTCTTTGCGAAGCGATCATCA  
AACTTCTCCGTCAGCTTACTGTAAACAGTAAATACAATAATGCGATAATCTTTGAAACG  
CGAATGTAATTAATTACAATTTGATCCTCTCCGTTTCTATTTGCGTTGCGTTATATGTAC  
TTTCTCGACGAATGACGCTTATCTTGAGAAATTTCAATTCACCGTAAAATATAAATATCT  
ATATCGTGTGCGTCGTATTAGTTTTTGGTTAACGAATGAATTTAATCCGCGATCCGTATG  
CGGTAAACGTAAACAATTTCAAATATATATATATATATATATATATATGAGAAGAAACGAGGG  
ATACGAGAGACAAAATATTTTTTATAGGCTGTAAAGTGTGAGGGATTGAATCCGGTATC  
CGTGGATATTTTGATTACAACTTTCGTGACAGAAACGAGCTTTACCGGCAGTCACGTA  
CGAAAACACGAACGATGCGCCGAGGTAAAAAGTAGGTAAGCGATCGAGGATCGAAGG  
GACGTTCTGATAGATAAACGATGCTGGCAGGTATCGAATACCCGGTTGATCGCTGTCGTA  
CTTCTCGATCAATTGCATTCGCATCGATGTGTACAAATGTATTGGAAAATTTAGAGAGG  
AAGAAGAGATGCGAAATAAAAATTATTAATCGAAGAGATTTGAAGGATTTGGAAAGA  
GAGGAGGATTTTGAAGAGGGAAAAGGATAAATATTCTTCTTAAGAATACGCGAATCC  
AAGATTCCGATTTATTATTGCGACGATAATAGTTGGCAAAAAGATGAAAAGCGTGGTAA  
AGATAGAAGTGGAAGAAAAGAAAGGGGAGGAAAGAGGAATGGAAAACAGATATAAA  
CGGACAAAGGAAGAAGGAAGAGAGAGCTCGGTTAGAACTGGCAAGTCCTCGACAG  
CTCGTTTCAAACATCTGTTTCGCTCCGAGAGATCTCTTTCCTCCCAGTCCCGCGATCTCG  
CAAATTCATACGGCCTGTGACGCGAGCCAACATCGTATACGCCTTCGCGCGCGCGCATA  
TTACGTGTATATGTGTTATACGTTTTTTCGAATTTCTCCGATGCGCGGGGAAGAAAGAGC  
GGTGATCCAAAAATCGGAACCGTAACCAAACGGTACGCGGTGGATAATGTGGATAGAG  
AGCTGGTGGGAAAATGATTGGTGGAAGGTGCAAGAACCGGGGAATGGAAATAACCGA  
GATCTCCAAAACGTGTATAGCGGAAAGACCATGAGAAATTGTTTTAGCACGGTGAAC  
TGGCAACTGGTGTGCGCGTCAAATCCGAGAAGCGTTCTTGGAACGGTATAAACGCG  
CCGAGTTTTTTTTTCCCGTCCACGGGGCTCAATCATGAGCGTTGCATCGAAACGCGCAA  
CGAGCGTAAAGTTGCGCGCCATTAGAAATCCGCGATTTCGGTATATGGAGGACAAATGG  
TCGCGGAACAAACGTCTCGTCCTACATTTGGCGGCCTACACAGCCGACAGATGCGGTG  
ACAAGCGAGAATCACCTTAAAGGCGTCGCGCTCCACAGATTGCACCGACCGCTGATTG  
ATGCGAGCGAGCAACAATCGCAAGCCAGTTTCTCTATTTCATCTTCTTCTTGCCTCCAT  
GCATTAGCGACAATGCTAACCTGCATTAAGCGCCACTGACCACTACCGCACTTACGCGT  
GTAATCCTTTCTCTCTCTCTAACCTGCCGTTCCCTTTCCACCATTTTATCATTTCAA  
CACTTGCGTAGATTTATGGCCTTGAATATTAGAGCGAATCTTGTTGATAGCGAGTTTGAT

AACGCTTCGTATACGTTTTTAGATCGTTATCCGTGTAAATTCCGATCGAAACGATCTACT  
ACTCGATCTACCTCGATTCCATTATTGACCAAATCTTTATTGATAAACGCTCTTGTAATA  
ATCAACGATCGTGTTGCGCGTACGCTTGTTGAAAGAGTTCGCGTCGTTTTCGCTGTTT  
GAATAAAAATTATTCTCTCCGATATAATTTCCATATTCGACGCCCAGTTTGACGTTTGATC  
ATGATCAACGCGTTCTTCCTACACGGTTCAAAGGATACTCGTGACACGCTTGATACCAA  
AATCATTAATATCTCGACCGTCCTTACGTGTGGCCAACACCTACGCGATCAGCAGGGTT  
TCCGACGATCCATCCAACGAGTCGAGATTTGACAGGTTTCGATAACCGCGGCATTCTGTA  
GACGTGACACTGGATAGATATCTTATAACGAAGCAAGAAAGAAAAAGGATCGTAATTG  
TAAAGATAGGTAGATTTTATTTTATCGATTGGTAGAAAATAAAATTGAAACATGTTTCGGA  
ATGGCAGATTTCGGAATAAAATTATTAATAATTTAAACGTTAGGAAAAGTTTGTGTTAATC  
CGTATAATTTATACATATTTTCAAGGGTCGCATGCCATTCATGCGTGCAATGAGCATGGAAC  
AACGGTGGCAAGATCTGGCATCTCTTTTATCGCTACCTGGTGCACCAGAACATTTTCCA  
CATACACATCCTGGATACCCAGGGCACGGTATAAGCCACAGTCATTATGAAGCACAACG  
TAACGTGTTGCTTCACAATGCCACTCTGGCTCCACCGGTGGGTGATCTTAATTTCGACCA  
GTCCTTACCACAATGTAGGTGGATCGTCGAATTTGGGCTCGGCTGTAGCAACGTCGATG  
AATTTAACGAATAGTAGCGAACCGATGGGTGCGGAAAGTGGAGCAGCTTATAAATCCG  
AGCCGGCAGATATGATGTACTATCACACACCAACATCCGATTTCGATAAATCAAACCTACC  
GATGGTTTTCTTTCGTCTCTACTTAACGACGAGGATTTACATCTGATGGACATGGCTATG  
AACGATG

>novel\_circ\_000261

GAAACGAAACCGGAAGTGAAGAAGAAGGAAAAAGATAGCATCGAAGAATCGACGAG  
CGAAGCAAAGGACGACGAGTCGCCGATTATAAGCAGCTCGAGCAGCGTCGAGGTCGC  
GAAGTCGTGAGGTGCGAGGATCCTGAGACCGGCGACATGATTCACACACCGCAATTT  
CATCATCCCCATCATCCTCACCATCGTTTCTTCCAGGGTCGCATGCCATTCATGCGTGCA  
ATGAGCATGGAACAACGGTGGCAAGATCTGGCATCTCTTTTATCGCTACCTGGTGCACC  
AGAACATTTTCCACATACACATCCTGGATACCCAGGGCACGGTATAAGCCACAGTCATT  
ATGAAGCACAACGTAACGTGTTGCTTCACAATGCCACTCTGGCTCCACCGGTGGGTGA  
TCTTAATTCGACCAGTCCTTACCACAATGTAGGTGGATCGTCGAATTTGGGCTCGGCTG  
TAGCAACGTCGATGAATTTAACGAATAGTAGCGAACCGATGGGTGCGGAAAGTGGAGC  
AGCTTATAAATCCGAGCCGGCAGATATGATGTACTATCACACACCAACATCCGATTTCGAT  
AAATCAAACCTACCGATGGTTTTCTTTCGTCTCTACTTAACGACGAGGATTTACATCTGAT  
GGACATGGCTATGAACGATG

>novel\_circ\_000262

GTGAATATATACTCAATTCTGGAAATCAAGAGGGAGACGGGAACAACGCGATCGAAGA  
GGACGATCGCCTCCTTAGAGAAGCGTCGCTAGATTTAGACAATCACCCGTTGGCTGGAT  
TAACCGATGATTCTTTGGGATTAACCGACACTTTAGAACTCGAGAATGATCTTCCTTCG  
GACTTGCTCGGAGGTAGTCTCTTAGCGAGCGCAAACGTCGAAAGTCTTCTTAACAACG  
ATAGTTTGGATCTACCCGACGGATTCAATCTCGAGGAGGCACTCCAACCTCGTTGGCCTC  
GATGAGGCGCAATCAGAGGAAACGAAACCGGAAGTGAAGAAGAAGGAAAAAGATAG  
CATCGAAGAATCGACGAGCGAAGCAAAGGACGACGAGTCGCCGATTATAAGCAGCTC  
GAGCAGCGTCGAGGTCGCGAAGTCGTGAGGTGCGAGGATCCTGAGACCGGCGACAT  
GATTCACACACCGCAATTTTCATCATCCCCATCATCCTCACCATCGTTTCTTCCAGGGTCG

CATGCCATTCATGCGTGCAATGAGCATGGAACAACGGTGGCAAGATCTGGCATCTCTTT  
TATCGCTACCTGGTGCACCAGAACATTTTCCACATACACATCCTGGATACCCAGGGCAC  
GGTATAAGCCACAGTCATTATGAAGCACAACGTAACGTGTTGCTTCACAATGCCACTCT  
GGCTCCACCGGTGGGTGATCTTAATTCGACCAGTCCTTACCACAATGTAGGTGGATCGT  
CGAATTTGGGCTCGGCTGTAGCAACGTCGATGAATTTAACGAATAGTAGCGAACCGAT  
GGGTGCGGAAAGTGGAGCAGCTTATAAATCCGAGCCGGCAGATATGATGTACTATCAC  
ACACCAACATCCGATTCGATAAATCAAACCTACCGATGGTTTTCTTTCGTCTCTACTTAAC  
GACGAGGATTTACATCTGATGGACATGGCTATGAACGATG

>novel\_circ\_000263

GACATGGATTTGATCGAAGTGCTTTGGAAGCAAGACGTGGATCTGGGATTCACGTTGG  
TGGAACCGACTACCACGGCGACCAAGAAGTTGTCCACGGTGGAGAAGGGAAGCGAC  
GATGAGATCGAAAAATTAAAAGCTTTAGAAGCGATCAATGGAAGCAACGAAGAGAAG  
GATACAAAGGAATACGACGAAGCGCAAGACGATCCATGGGCAGGCCTCCCTTACACCA  
TTGATCTCGAGACCGGTGAATATATACTCAATTCTGGAAATCAAGAGGGAGACGGGAA  
CAACGCGATCGAAGAGGACGATCGCCTCCTTAGAGAAGCGTCGCTAGATTTAGACAAT  
CACCCGTTGGCTGGATTAACCGATGATTCTTTGGGATTAACCGACACTTTAGAACTCGA  
GAATGATCTTCCTTCGGACTTGCTCGGAGGTAGTCTCTTAGCGAGCGCAAACGTCGAA  
AGTCTTCTTAACAACGATAGTTTGGATCTACCCGACGGATTCAATCTCGAGGAGGCACT  
CCAACCTCGTTGGCCTCGATGAGGCGCAATCAGAGGAAACGAAACCGGAAGTGAAGAA  
GAAGGAAAAAGATAGCATCGAAGAATCGACGAGCGAAGCAAAGGACGACGAGTCGC  
CGATTATAAGCAGCTCGAGCAGCGTCGAGGTCGCGAAGTCGTCGAGGTGCGAGGATCC  
TGAGACCGGCGACATGATTCACACACCGCAATTTTCATCATCCCCATCATCCTCACCATC  
GTTCTTCCAGGGTCGCATGCCATTCATGCGTGCAATGAGCATGGAACAACGGTGGCA  
AGATCTGGCATCTCTTTTATCGCTACCTGGTGCACCAGAACATTTTCCACATACACATCC  
TGGATACCCAGGGCACGGTATAAGCCACAGTCATTATGAAGCACAACGTAACGTGTTG  
CTTCACAATGCCACTCTGGCTCCACCGGTGGGTGATCTTAATTCGACCAGTCCTTACCA  
CAATGTAGGTGGATCGTCGAATTTGGGCTCGGCTGTAGCAACGTCGATGAATTTAACGA  
ATAGTAGCGAACCGATGGGTGCGGAAAGTGGAGCAGCTTATAAATCCGAGCCGGCAGA  
TATGATGTACTATCACACACCAACATCCGATTCGATAAATCAAACCTACCGATGGTTTTCT  
TTCGTCTCTACTTAACGACGAGGATTTACATCTGATGGACATGGCTATGAACGATG

>novel\_circ\_000264

GTGAATATATACTCAATTCTGGAAATCAAGAGGGAGACGGGAACAACGCGATCGAAGA  
GGACGATCGCCTCCTTAGAGAAGCGTCGCTAGATTTAGACAATCACCCGTTGGCTGGAT  
TAACCGATGATTCTTTGGGATTAACCGACACTTTAGAACTCGAGAATGATCTTCCTTCG  
GACTTGCTCGGAGGTAGTCTCTTAGCGAGCGCAAACGTCGAAAGTCTTCTTAACAACG  
ATAGTTTGGATCTACCCGACGGATTCAATCTCGAGGAGGCACTCCAACCTCGTTGGCCTC  
GATGAGGCGCAATCAGAGGAAACGAAACCGGAAGTGAAGAAGAAGGAAAAAGATAG  
CATCGAAGAATCGACGAGCGAAGCAAAGGACGACGAGTCGCCGATTATAAGCAGCTC  
GAGCAGCGTCGAGGTCGCGAAGTCGTCGAGGTGCGAGGATCCTGAGACCGGCGACAT  
GATTCACACACCGCAATTTTCATCATCCCCATCATCCTCACCATCGTTTCTTCCAG

>novel\_circ\_000265

GACATGGATTTGATCGAAGTGCTTTGGAAGCAAGACGTGGATCTGGGATTCACGTTGG  
TGGAACCGACTACCACGGCGACCAAGAAGTTGTCCACGGTGGAGAAGGGAAGCGAC  
GATGAGATCGAAAAATTAAAAGCTTTAGAAGCGATCAATGGAAGCAACGAAGAGAAG  
GATACAAAGGAATACGACGAAGCGCAAGACGATCCATGGGCAGGCCTCCCTTACACCA  
TTGATCTCGAGACCGGTGAATATATACTCAATTCTGGAAATCAAGAGGGAGACGGGAA  
CAACGCGATCGAAGAGGACGATCGCCTCCTTAGAGAAGCGTCGCTAGATTTAGACAAT  
CACCCGTTGGCTGGATTAACCGATGATTCTTTGGGATTAACCGACACTTTAGAACTCGA  
GAATGATCTTCCTTCGGACTIONGCTCGGAGGTAGTCTCTTAGCGAGCGCAAACGTCGAA  
AGTCTTCTTAACAACGATAGTTTGGATCTACCCGACGGATTCAATCTCGAGGAGGCACT  
CCAACCTCGTTGGCCTCGATGAGGCGCAATCAGAGGAAACGAAACCGGAAGTGAAGAA  
GAAGGAAAAAGATAGCATCGAAGAATCGACGAGCGAAGCAAAGGACGACGAGTCGC  
CGATTATAAGCAGCTCGAGCAGCGTCGAGGTGCGGAAGTCGTCGAGGTGCGAGGATCC  
TGAGACCGGCGACATGATTCACACACCGCAATTTTCATCATCCCCATCATCCTCACCATC  
GTTCTTCCAG

>novel\_circ\_000266

GTGAATATATACTCAATTCTGGAAATCAAGAGGGAGACGGGAACAACGCGATCGAAGA  
GGACGATCGCCTCCTTAGAGAAGCGTCGCTAGATTTAGACAATCACCCGTTGGCTGGAT  
TAACCGATGATTCTTTGGGATTAACCGACACTTTAGAACTCGAGAATGATCTTCCTTCG  
GACTTGCTCGGAGGTAGTCTCTTAGCGAGCGCAAACGTGCGAAAGTCTTCTTAACAACG  
ATAGTTTGGATCTACCCGACGGATTCAATCTCGAGGAGGCACTCCAACCTCGTTGGCCTC  
GATGAGGCGCAATCAGAG

>novel\_circ\_000267

GACATGGATTTGATCGAAGTGCTTTGGAAGCAAGACGTGGATCTGGGATTCACGTTGG  
TGGAACCGACTACCACGGCGACCAAGAAGTTGTCCACGGTGGAGAAGGGAAGCGAC  
GATGAGATCGAAAAATTAAAAGCTTTAGAAGCGATCAATGGAAGCAACGAAGAGAAG  
GATACAAAGGAATACGACGAAGCGCAAGACGATCCATGGGCAGGCCTCCCTTACACCA  
TTGATCTCGAGACCGGTGAATATATACTCAATTCTGGAAATCAAGAGGGAGACGGGAA  
CAACGCGATCGAAGAGGACGATCGCCTCCTTAGAGAAGCGTCGCTAGATTTAGACAAT  
CACCCGTTGGCTGGATTAACCGATGATTCTTTGGGATTAACCGACACTTTAGAACTCGA  
GAATGATCTTCCTTCGGACTIONGCTCGGAGGTAGTCTCTTAGCGAGCGCAAACGTGCGAA  
AGTCTTCTTAACAACGATAGTTTGGATCTACCCGACGGATTCAATCTCGAGGAGGCACT  
CCAACCTCGTTGGCCTCGATGAGGCGCAATCAGAG

>novel\_circ\_000268

GTAATTTAATCTCGTTGTATTTCGATTTCTGTGCAAGATCTATCGCTTAAGCGACGGATT  
TTCGATAATTTTATTATTCTTCGAATTTTGAGAAGAAGCAAGCACATTTATATAAAACAA  
ACCTGTGAGCAAGATTTTCACGATTGGAATAAAGAGGAG

>novel\_circ\_000270

CCTCAGCACAAAGGAAGGTATATTCTCGAATATGTATGCAAGCAACTCAATATCTTGGA  
AACGGATTATTTTGGGCTTCGATATGTGGATCATTGTAGGCAAAGGCATTGGTTAGATCT  
GGCAAAAACAGCGATTAAAGCAAGTAAAAGACATGGACCCGATTCTGTTTAGTTTTCGC

GTGAAATTTTATCCACCGGATCCTCTGAGGCTGAAGGAAGAAATAACTAGGTATCAAGT  
TTACCAGCAGCTTAAGAGGGACCTTCTTCATGGACGACTATATTGCAGTCCAGGTGAA  
GCAGCGCTGCTGGCGGCGTGCATCGTGCAAAGCGAATTAGGGGATTATGATCCTAAAC  
TTCACGAAGGAACTACATTTCCGAGCATAAATTATTGCTTAAACAGACGGAAGCTATT  
GAAGAAAAGGCTATGAACTGCATCAAACAGAATTGAAGGGATTCACTCCACAGCAG  
GCAGAACTCATTTCCCTTAGGTTAGCATCACAGTTGGATACATATGCTGTTGATCCACA  
CCCCGTAAAGGACCAAAAAGGTGCGCAACTATATCTTGGTATTAATCATTGTGGAATTC  
TGACATTCCAAGGATCTCGTAAAACACATCATTTCCGCTGGCCGGAGGTTTCAGAAAAT  
CAACTACGAAGGAAAAATGTTTATTGTACATTTAACAATAAGTGAG

>novel\_circ\_000271

GAAGCCAAACAACTAAGTGTTGTATGGACAAGACGTAGTAGAAGAGTTAGTTCAGA  
ACCATTAGATTGGGAACCCAGTTTAAAGTGATCCATTAAAAGGTGTCATTAGTTGGGCTG  
TTCTTGATAATCATACAGTTTCAGTAACTTTGTTTAAAGATCCAAGAAGTCAATGAATTAG  
AAGATAAAGATTGGACATTTGTAATTGAAGATGTTTCATCTACTGGTAAAAGACGACAT  
GTAGCTGCTACAAACATAAACATGAAAAAGTATGCTACTTTAGAATCTAGTCAACAACA  
ACTTAAATTGGATTTAAAACCTACATCAAAAAAATTGTTAATGCTACATTAGAATGTAC  
TTTATCTTGTGTCTTTTTAAGAGAAGGCAAAGCAACGGATGAAGATATGCAGAGTATGG  
CTAGCTTAATGTCAGTTAACAACAATAGTGATATTGCACCTTTAGATGATTTTCGATAATG  
AAGATATACCAGAAGATGTTGAAGAAGTATCTGGAAAAAACCTTGATGAAATTTTAGAT  
ATCTCTGCTCAACTTGATCTAATGACAAGTAGTCTTACTGAAAGTGAATTACCTAGTACT  
CCAATAAGTGTGGCAAGTTTATCAAAAGATGATACCACTCCTGTAAATGATAGCGATCA  
TATCATCCGTGATGTTAGTTTGTGTCAGGCATCGGTGATTTCCTTTAAAGAAAAATCACCTTT  
AAAGGATACTATTGCTGTTGAAAACAATAAAAAATATTGAGCATACTGATAAGATTACC  
ATTGCAACCATTAGAATTAAAAAAGAATGATGCCAATATTCCTAGATTAAAAGAAATTA  
CTCCAGGTCAGGATTTATTAGAATGGTGTAAGAAGTAACTAAAGATTATTCTGGAGTG  
AAAGTCACTAATCTTACAACATCTTGGAGAAATGGAATGGCATTTTGTGCAATCATACA  
TCATTTTAGATCAGATCTTATAGACATTGATTTCGTTATTGCCTCATGATGTAAAGGGTAAT  
TGTA AAAAAGCATTGATGCTGGAGAAGCTCTTGGGATACCTAGAGTAATAGAACCAG  
CAGATATGGATATATTGACTGTACCTGATAAATTAGCTGTGATGACTTACTTGTATCAATT  
GAGAGCACATTTTACTGGTCACGAATTAGAGGTACATCAAATAGGTAAAACAACAGAT  
GAATCATCTTATATGATTGGCAGATTTAATACAGACAATAATTCAGATGTAAGTGTGCAA  
TTATTTGGTTCAGGAAATAATTAATTTGCGCAAAAAAGATCAAATGGATCATAAAAAATAAT  
AAAAGTGATAATAACAGACGATCAAATCCATTTGATAATAAGAAAGAAGATGTTAATAT  
TGATGCTTTAAAAAATAAATTACATTTAAGTTTGAACATAGAAAATCAGGATCATGATCA  
ATGCAAAGATAAGTCACCATCAAGTGTTAAAGATGTTAAAGATATTATATTAGCTAGTTC  
AAAAAGTATTTTAGAGAAAGTATTATCACCAACGAAAGAAAAATATTTGTCTAGAGAA  
AAGAGTAAATCTCCACCAAGAATATCGCAAACACAGCAACGACCTATATTAATGACTCG  
TCGACAATTAACAGATCCTTTTGGATCTGATGAAGAAGAAGAAAAATATTCAAATAATTG  
ACGAAAAATGGTCTCAATCAATTTTCGATTAATAAATCAGAAACGCCAATTAATAATGATT  
CAATCAATATAAGTGACAGAGGAAATCGTACTGAATATCAGACAATATCACCACAAGGA  
GAACAACGTTGTCAAATCCATTAGTCAGTCGACATGACGAATTAAGACAACGTGCCA  
GACAACTATTAGAACAGGCTAGGAATCATACAAAGTCAACTGGTCTTATTTCTACTGCT  
GCTTGTCTTATTGAGAGTCAAATGATGATGAAAGACAGCAACAATTACGTGAAAGAG

CAAGACGTTTAAATAGCAGAAGTGAAAATGGGTGTGAACATTACTTCAAATCAAATTAAT  
GATGACAATAATAGTGATAGACGTTCAATAGATGATCAAAATAATAGTCCAAGACGAAG  
TATTACACCGTCTACTCCGGGTGATAAATTTAGTACAAAG

>novel\_circ\_000272

CGTGTGACTGCCATCCGATCGGCGCTTCCGGAAAACTTGTAACCAAAGCACCGGCCA  
ATGCCCCGTGTAAAGACGGCGTAACTGGCACTACTTGTAATAGATGCGCCAGAGGTTAC  
CAACAGAGTAGATCGCATATCGCACCTTGCATCAAAATACCGAGAGTTGTGCAGACTC  
AAGGCACGGCCGGCGAGGAGAGCGGGGAGCACGAAGACGACGACGACGATCGCGGT  
TACGACGGACGAGCCG

>novel\_circ\_000273

CCCTTCGAAAATTTCTTCGGGCCGATCTTCCTCGAGGTAAACGCGCAAGGAGAGGCGA  
AGGCAGCGGGCGAAAAGAGGAGAGAAGGGAATATCGTCTGCTGGTCCAGTGGTCGGC  
TGGTTTCCGGTAGCGCGGCGCGGCTGCTGGATCCTCGATCCAGTGTGGCGGAACGCGA  
GTAGTGGGGTTCGCGGCGAGTAGTGGCGCCCCGGATTGGCCGAGCAGGAATTGGTCTT  
GGACGAGAGGATGCGAGCCGGCGGTCAAAGGGGAAAGAGAGGGGAGACTCGGGCGAG  
CGGAGGAAGAGCGGTGGTGGGGATGGCTGCGAGCTAGAGAGAGACTCGGAACAGTT  
CGGATGCACACCGTGCAAGGACGGCGATTCAGTTAGCGGCGAGCCGCCGTCCGTGGA  
GGATCGTTGATCGTCGATTTTTCTTCCTTCTCCTCGGGTCGCATCGCTTCGGCCCCGAGC  
GGCGTGCCGCGTACCGTGTCTTTTCGAGGTATACACACGTTTCAACGATTCGCGTTTCA  
GCGAAACTGTGCGGTGTAACGCGCGCACGCGCCCCCTACCGCATCTCGTTACGATCGTA  
CCGTACTCGCTCAGGAATGAAATTGACACGCGCGTTCCGCGTTCTGAACATCGAATAC  
ACCTGAGTGAATACCTCTCGATGAAATTTATCGAAGCTGCTTTCCCGGCAATCGTCT  
CGACGGGCAACAACAACAACGTTTCGAAAATATTCGAGAGTATTGAATCGAAGAG  
GCGAGCTTTCGAGAAGAATTTCGCGAAATAATGCAAGTAAAGGAAGAACGATCGAAGG  
AAGCGGGCTCGCTAGTCGGCATCGACGCGTTGAACGAATCGTAAAATCGATCGCGTCG  
CGAGATGACGACCAGCCGAGAAGCGTAAGATCGAGAGTTCTCTGTTGGAGAGAGGAT  
CGAACGGGATCGCAACCCTCGTCGTTCTTCCGTTATCGGGAGAAGAACGGAGCGAGG  
AAATAATCGTTCGGACGAAAGAAGGACGGTTTGC GCGCGTAGGTGACACAGTAAGGGG  
CTGTGCGGGTAAGAAGGGACGAGGAGAGGCGAGGCAGAGCGAGAGGGAAAGGGGG  
AAGGAGGGCGGGAAGGGAGAAGGGAAGGGAGAAGAGAGGAGATAAAATCGGCCGG  
CGCGCGAAATAACACCACGGTCGAAGATGAGGAGCGGATCGAGGGACGCGCGATTCC  
TCGTCTGGGATCATTTGCGGAGTGATCGTGGGTATCGATCGCGGCTACGCGTTGGGGGG  
GAGCGAGATCTACGCGAAAACGTTCCCCAGCCAGCAGCACCCATCGGATCCGTGCTAC  
GACGAGGACAGGCCGCGACGGTGCATACCGAATTTTCGTGAACGCGGCGTTTCGGCGCG  
GCGATCGAGGCCTCCTCGACCTGCGGGAGCGGCGGGGCCACGAGGTATTGCGACGTG  
GTCGAGCAGCCGGGAGGTAGCACCGGCATAGGTCAAGTCCACATCTGCGACGACAGC  
ACGCCGCGGCGCCGTTTCCCCGCGAGCTACCTCACGGACGTGAGCAACCCCAACAAC  
GTGACCTGCTGGCGGAGCGAGCCGCTCGTCACGTCGCAGAGTTTCTCCGCGCCGCCC  
GACAACGTGACCTTGACCCTCTCCCTGGGCAAGAAGTACGAGCTGACCTACGTCAGCC  
TGCAGTTCTGCCCCAAGGCGGCCAAGCCTGACTCGATCGCGATTTACAAGTCGATGGA  
CTACGGCAAGACCTGGCAACCTTTCCAATTCTACTCGTCCCAGTGCCGCCGCGTCTACG  
GGAGGCCGAACCGGGCCACCATCACGAAGGCGAACGAGCAGGAGGCGAGGTGCACG

GACAGCCATCGGTACACGGGCGGCAACGGGCTCGCGCCCGTCGGCAGGATCGCGTTC  
AGCACGCTCGAGGGCCGGCCGTCCGACTTCGACAACTCGCCGGTGCTGCAG  
GACTGGGTGACGGCGACCGACGTCCGCGTCGTGTTCAACCGCCTGCACATGCCCCAA  
CAACCGTCCCAGGAGCAAGTGCTGCAGCTGGGCGGCGGCGACGAGCACGGCCTCGGC  
CTCGAGGAGCTGGCGAAACGCGAGAGGGAGCGGGAGGAGAGGCTGAAGAGCCAGA  
AGAGCCGGGGCTCGCTCGACCCCCTGGCCACCGCTCTGCCCTCGGTGCACCAGGTGAT  
CGCCCCCAAGAGATGCAGTCGAACGACGCGGTGGAGGAGGGCGGGGGGGGCGCTT  
TCGCGGCCCGTCACCGTGTCCACCACGACGAGCAGCACCCCTCGCAGCAGCCGGCCTCG  
GGACGGGCACGCTCGCCCATCACTACGCCGTCTCCGACTTTGCCGTCGGCGGCAGGTG  
CAAGTGCAACGGCCACGCGGCGAGGTGTATCCAAGGCAAGGACGGCGAGGTGCGCTG  
CGAGTGCAGGCACAACACCGCCGGCAGAGACTGCGAGAGATGTCGGCCGTTCCACTT  
CGATCGACCCTGGGCACGGGCCACCGCCAGGGATGCCAACGAATGCAAAG

>novel\_circ\_000274

CTTTATAATTTATAACTGATGATATGGCAGAAGCACATTCAGCTGTAGCATTTAGTTTTTC  
TATTACTCATGAGGGATGGGATGTTAATTTTGATAGAGAAGTTTTACATTTAGTATGGCA  
ATCAGGTATCCGTTCTTGGAAGAAAAGATTTTTTAGATTTGTTAACAATTTGAGAAGTG  
GTGTATATCCTGCTTCTTTAGAAAGTTTATGGTTTACTATAGCTGTAGTGACTGCTATACA  
TTTTGCTGGTTTTAAAGTACCTTATGATCTTGTTGGAAAACTGCACCATATCTTTCAGC  
ATCTTCAGTATTGGCTCATTTAGCAGGATCTTTTATAATTGGATTGCTTTTATGGTTGATG  
GTAATATATGTAATTCGATATACTTTTAAATTGTTACTTATGTACAAGGGATGGATGTATG  
AATCAAGAGAAAAAGGATGTAATGCATCGAGGATCACTAAAACATGGACCACATTAGT  
GAAATTGTTCTTTGGGTGGCACAACCAATGCTTTATAGTTTCCAAGGATCATTGCCAC  
GGCTACCATTACCCTCAGTAGTAGATACAATGAAGCGGTACCTACGAAGTGTTTCGACCA  
TTGCTCGATGATGAAAATTATGCTCGAATGGAGACATTAGCTAATGAATTTCAAAAAGG  
AATTGGTGTGAACTTCAGCGATATTTAATTTTAAAGTCTTGGTGGGCTACTAATTATGT  
TTCTGATTGGTGGGAAGAATATGTGTATTTACGTGGACGATCTCCTATTATGGTTAATTC  
AAATTTTTACGGTATCGATGCTATTCTTATGTATCCTACTAATATACAAGTTGCTCGTGCT  
GCAAGTGTTATTTATTCGTGTCTACAATATCGACGGCTCATTGAACGACAAGAATTAGA  
ACCGATATTAATTCAAGGATTGGTACCTCTTTGTTTCATGGCAATATGAAAGAGTATTTAA  
TACTACAAGAATACCAGGACGTGAAACAGATAAAATTGTACATTATCAAGATTCTAAAC  
ATATTGTTGTATATCATAAGGGAAAAATTTTTAAAGTTCCTATTTATCACAAAAATAGAAT  
TCTTCAACCTTCTGAAATTGAAAT

>novel\_circ\_000275

GGTGGATTCGCGAAAGTTTTTCTGATGACTGATGTCAATAATGGAAATGAATACGCATG  
CAAGATTATCAGGAAAAACCGAATGCAAAAAATCCATATGCAAAAGATCGCACGTGAG  
ATTATGATTACAAAGAGCTGAATCACATGAATGTTGTCCAGCTGCATCACTACTTCGA  
GGATAATCTTAACGTGTACATGCTTCTGGAAGCCTGTCCTCGAAAGAGTTTGATGCACG  
TGCTGAAGTACCGTGGCAAAGTCACGGAGCCGGAAGCACGGTATTACATGAAACAAAT  
GGTAACCGGTGTTGCGTATATTCCTCTCAGAAAGTTGTCCATCGGGATTTGAAGCCAG  
GTAACATGTTCCCTATCGGACCGTATGATCGTCAAGATCGGAGACTTTGGACTGGCGACA  
AGGCTTGACGGACAGTGCAGACGAGT



>novel\_circ\_000276

ATAAACGTCGTAATAAGGAAATTATGGAGACATATGCCACCAAATTTCCAGACTACACA  
TTCCTTCGAACAAAATTTCGATACAAATCTTTTTTCGAACTAATGAAACATTTTGTGTGGA  
AATTAAACCAAAACAAGGCTATTTGCAAGATATTGATCAAAAATTCAAAAGTGTCTT  
ATTGTTTGACACAATATTATAAGTTAAAGAAGAAGATGATCACATGTCGCAGTACTTATT  
GTCCATTTGATCTCTTTTCTGGAGTAGAAACACGCATGAAATCGGCACTAAAAGGATTA  
TTAAAATCACCTCAAAATAATTTAAAAATTTTTAAGAATGGTATTCTAGTCTATGATCAA  
GAATCATCTTTAAGCGATCTTGAATGTGCTTTATCTGATTGGTTTCGTAATTCTATTAATT  
CCACAAAAAAGGAATACATTGATAAATTCTGTAATTTGATTTGTACTGCTCTTTTACATC  
CATTTATTTTAGAAGAATATAAGTCTAACATATTTTCTTCTTATGAATTATACACATCTGAT  
GCACATGATTTAAAAACAACCTTCCTATATTAATACAGATCTAATTGCAAAAACATAAAAAA  
TTTTTGTATTTTCGCTGGAGAG

>novel\_circ\_000277

AATCGAAGTGCCAGAGTAAGCGTGAGCAATGAAAACAATATATTACTGGACCCAGAAG  
TATTGACAGATTTTTCTATTCAAACCTTTAGTTTTAACCGTGTTGGTAACTTTAGTTAAAA  
ATTCAACGGACGAAAATGAACAACGGATTCTTTATGAATATCTTGCAGAAGCTTCGGTG  
GTCTTTCCAAAAGTTTTCTGTAAATTCATAATTTACTTGATGCAAAAATTAATAATGTAT  
TATCTTTCTGTCACGATCAATGTATATTGAATTCTGTACAAGCAATTATACAGAATATGAT  
CGCATGTGAGGATACAAGTCAACAGCAATTACATTACTTGCAAAGTTGTGGATTGGAG  
GATTATGGAGATTTGCAGGTCCATACACAAATTCTAATTGCACAGCTGAAAGTGCTCAA  
TTATTTGTTAATTGTCTGGAAGCTATGGTGGAAACGTGTTTACCAGTAGATGAACCTGA  
AATTTTAAGCACTGAAATCCCAAGTGAAAAATTTAAACGATCCGATGGTCATTATTCAG  
ATATTGCACAAAGAAGCAAATCTTCAACTCATGGAAGTATCGATCAAGTGCCCGCATT  
TTTTCGGATAGAATGGATGAAGCTTCTCATAATGCTTCTTTTCGTTACAGAGATCGCAGT  
ATAGAAAGTAGAGATGTTTCATTGGATTCAAGCCAAGGAGAAAATATTACTAATAATAG  
TAACAATTCATTACCTTAGCGATTAATATGTGAATCCAAAAACAATGCAGTAAACATG  
GACGAAAAGGACAAGTAGGTCGAAAATTACAAAGACAATTAAG

>novel\_circ\_000278

ATGGTTGGAATAGAACAACTAATTCATATAAAAAATTAGATTATGGAAAATGGGAATTAC  
ATTACCTCCTAATGCTGATGGTAGTTGTCCAATAAAGCATCTTTCAGAAATTAAGATAA  
TTGTAAAAGATCAAAATAATGAATTATTGGAACGATTAAAGTCCTTGGGCTACATATGTCA  
CACAAGATAAATCTGAAAGTGCTACATATAAACACGTATATGGTATCCATTACCTGAAA  
ATGTTTATAAATTTAAATATTCCAAACAGAAAAAACCAAAAAGTCTTAGAATTTATGAAT  
GTCATGTTGGTATTGCAACTCAGGAATTAATAATTGGCACATATCTAGAATTTGCTAAA  
AACATAATACCTCGTATTGTAAACAAGGCTATAATGCTATACAATTAATGGCTATCATG  
GAACATGCTTATTATGCTAGTTTTGGATATCAGGTAACCTTCATTTTATGCTGCTTCATCTC  
GTTATGGTACACCAGAAGAATTAAACTATTGATAGATACAGCGCATCAATATGGTTTAT  
ATGTTTTATTAGATGTGGTACATTCACATGCATCAAAGAATACTTTAGATGGTTTAAATAT  
GTTTGATGGTACTGATGGTTGTTTTTCCATTCTGGCAATCGTGGTCATCATCCACTGTG  
GGATAGTAGACTTTTTAATTATGGAGAATATGAAGTATTACGATTCTACTTTCCAATTTA  
CGTTGGTACATTGAGGAATATAATTTTGATGGATTTAGATTTGATGGAGTTACATCAATG  
TTGTATCATTCAAGAGGATTTGGACAAGGTTTTACAGGTCATTATGAAGAATATTATGGA

CTTAATGTTGATGTTGAAGGTGTAGTTTATTTAATGCTTGCAAACCTATATTTTGCATTATT  
TATATCCAAATATGATTACCATAGCAGAGGATGTTAGTGGAATGCCTGGAGTTTGCAGG  
CCAATTACTGAAGGTGGTTTAGGCTTTGATTATCGTTTAGCCATGGCTATTCCCTGATAAA  
TGGATTAACTTTTAAAAGAAATAAAAAGATGAAGATTGGAATGTTGGGGATATTGTTG  
GACATTAACTAATCGAAGATGGATGGAGAAAACAGTAGCTTATTCAGAATCTCATGATC  
AAGCTCTTGTAGGTGATAAAACAATTGCATTTTGGCTTATGGATAAAGAAATGTATTTTC  
ATATGAGTACACTAAGTCCACCTAATGCAATTATAAATCGTGGGATTGCTCTTCATAATC  
TGATTACATTAATCACACATGCATTAGGAGGTGAAGCTTATTTAAATTTTATGGGTAATG  
AATTTGGTCATCCTGAATGGTTGGATTTTCCACGAGCTGGTAATGCAGATAGTTATCATT  
ATGCTAGAAGACAATGGAATTTAGTAGATGATGAATTACTTAAATACAAATTTATGAATA  
ATTGGGATCGGGCTGTAAATACTCTTGAAGCAAAATATGGATGGCTACATGCTGAACCT  
GGATATATAAGTTTGAAACATGAAGAAGATAAAATAATTGTTTTTGATCGTGCAGAACTT  
ATATTTGTTTTTAATTTTCATCCAATCAATCATTTCCTGATTATACTATTGGTGTA AAAA  
GTGCAGGAACCTATAAAATTCTTTTGTGTAGCGATGATAAAAATTTTGGTGGAGAAAAC  
CGTGTTGATACTAATATACAACATTTTACCAAACCAGAATCTTTTCTGATTATTCAAATA  
GTATGATGATTTACATTCCTTGTCGCACAGCTATTATTTATATTCGAGAG

>novel\_circ\_000279

ATGGTTGGAATAGAACAACTAATTCATATAAAAAATTAGATTATGGAAAATGGGAATTAC  
ATTTACCTCCTAATGCTGATGGTAGTTGTCCAATAAAGCATCTTTCAGAAATTAAGATAA  
TTGTAAAAGATCAAAATAATGAATTATTGGAACGATTAAGTCCTTGGGCTACATATGTCA  
CACAAGATAAATCTGAAAGTGCTACATATAAACAAACGTATATGGTATCCATTACCTGAAA  
ATGTTTATAAATTTAAATATTCCAAACAGAAAAAACCAAAAAGTCTTAGAATTTATGAAT  
GTCATGTTGGTATTGCAACTCAGGAATTA AAAAATTGGCACATATCTAGAATTTGCTAAA  
AACATAATACCTCGTATTGTAAAACAAGGCTATAATGCTATACAATTAATGGCTATCATG  
GAACATGCTTATTATGCTAGTTTTTGGATATCAGGTAACCTTCATTTTATGCTGCTTCATCTC  
GTTATGGTACACCAGAAGAATTA AAACTATTGATAGATACAGCGCATCAATATGGTTTAT  
ATGTTTTATTAGATGTGGTACATTCACATGCATCAAAGAATACTTTAGATGGTTTAAATAT  
GTTTGATGGTACTGATGGTTGTTTTTTCCATTCTGGCAATCGTGGTCATCATCCACTGTG  
GGATAGTAGACTTTTTTAATTATGGAGAATATGAAGTATTACGATTCTACTTTCCAATTTA  
CGTTGGTACATTGAGGAATATAATTTTGATGGATTTAGATTTGATGGAGTTACATCAATG  
TTGTATCATTCAAGAGGATTTGGACAAGGTTTACAGGTCATTATGAAGAATATTATGGA  
CTTAATGTTGATGTTGAAGGTGTAGTTTATTTAATGCTTGCAAACCTATATTTTGCATTATT  
TATATCCAAATATGATTACCATAGCAGAGGATGTTAGTGGAATGCCTGGAGTTTGCAG

>novel\_circ\_000280

GTTTATAAATTTAAATATTCCAAACAGAAAAAACCAAAAAGTCTTAGAATTTATGAATG  
TCATGTTGGTATTGCAACTCAGGAATTA AAAAATTGGCACATATCTAGAATTTGCTAAAA  
ACATAATACCTCGTATTGTAAAACAAGGCTATAATGCTATACAATTAATGGCTATCATGG  
AACATGCTTATTATGCTAGTTTTTGGATATCAGGTAACCTTCATTTTATGCTGCTTCATCTCG  
TTATGGTACACCAGAAGAATTA AAACTATTGATAGATACAGCGCATCAATATGGTTTATA  
TGTTTTATTAGATGTGGTACATTCACATGCATCAAAGAATACTTTAGATGGTTTAAATATG  
TTTGATGGTACTGATGGTTGTTTTTTCCATTCTGGCAATCGTGGTCATCATCCACTGTGG  
GATAGTAGACTTTTTTAATTATGGAGAATATGAAGTATTACGATTCTACTTTCCAATTTAC

GTTGGTACATTGAGGAATATAATTTTGATGGATTAG

>novel\_circ\_000281

GCACCAGATGGCGAAACACAACCAAGTACAGAAGTTGACTTATTCATCTCAACAGAAA  
AAATAATGGTTTTAAATACGGATTGAAAGAAATTATGATGGACCACGCGTTAAGAACA  
ATATCATATATAGCAGATATTGGTGATGTAGTAGTCCTAATGGCACGAAGACGCTTTGTA  
CCGCACGAAATGGAAGAAGCACCAAAAATCAACAGAACTCCAAAGATGATTTGTCAT  
GTTTTTGAAAGTGAAGAGGCTCGATTATTGCACAAAGCATTGGACAAGCATTTCAG  
TAGCATACATGGAGTTCCTTAAAGCAAATGGAATAGAAGATCATAGTTTTGTAAAAGAA  
ATGGATTATCAGGAGGTACTCAATTCTCAAGAAATCTTTGGTGATGAATTACAAATGTTT  
GCCAAAAAGAAATGCAAAAAGAGGTTGTAGTGCCTAAAGCAAAAGGTGAAATCTTA  
GGTGTCTGTAATTGTCGAATCTGGATGGGGTTCTATGCTACCAACTGTTGTAATTGCAAAT  
CTGGCACCAGCTGGTGCGGCTGCTCGTTGTGGACAATTAAATATTGGTGATCAGATAAT  
AGCTATAAATGGTGTTTCTTTAGTTGGCTTGCCTCTCTCTACTTGTGCACTTATATCAA  
AAACTCAAAGAATCAGACAGTTGTCAAGTTAACTGTCGTTCCGTGCGCGCCAGTAGTT  
GAGGTCAAATCAAAAGACCTGACACCAAATATCAGTTAGGATTTAGTGTACAAAACG  
GAGTAATATGTAGTCTATTGAGAGGTGGAATCGCTGAAAGAGGAGGTGTTGAGTGGG  
TCACAGAATTATCGAAATCAACAATCAAAGTGTCGTTGCTGTACCGCATGAGAAAATC  
GTCAATCTTCTTGCCACATCTGTTGGCGAG

>novel\_circ\_000282

AATTATAGAAATTGCTGGGGGACGAGAAGTTTTTTCTCAAAGCCGAGGTAAAGTAGCA  
GCTAGAAAATCACGATTTCTTGACGATCAAAATCTTTAAATAATGAAGATATTCAAATA  
GACAACAAGCTATCAGTTAAAAGAAATAATAAATCTCCAAATACTCAAATATATGGGA  
GTTAAGAAGTCGATGTGGTGATACAAGAAAACAGCGTTCTAATAGAGAAGTTACAGAA  
ACTGTATTTTCTTCAGAAATACATTCAGTGCGACATAATCCAGCAAAATCTATTGATTAT  
GATCCCCCTAAAAGCAATCACAGCAATCATATTATTAATTATGACTCAATTTGAATAGC  
AATAATGTAGAATATGATGTGTCAAAAAATACTGCAGATTTAGATTATGGATTATCAAAA  
AACTGCATAGATTATCAATCAAATCATACTACACCAGCAAGAAGCATGGCTATTGTTAGT  
GATGGTGAAGTAGTTGTTTTGATGATATTGATGATAATTGGCAAAATTTGCCACTAGAT  
TTAACTAATAATACTAATCAAGTTACATCAACTAATTTAAGTCTTGAGACTGAAGAATCT  
CAAAAAGGTCGCATTCCTCCAGAACCTTTAAGTTCTAGCATTGAAAGTACTCCAAGTC  
CAACAACAGCGTATCATCGTAATACTTCGGAATTTTTTAAGGTGATTCCAGCTAGTGATT  
GTGAAATAGAATCACCATCTTCAGAACGAAATCATAAAGTTACAAGAGTAATTGGTGAA  
TTACCAATAGCACAGTATTCTGAAAGTCCAAGACGTTATGGAATACGTGATACTCAACT  
TCCATGTCTTCTGTATCGCCATCTGTATATATGACACCAAGACCTGGTTTTCCACAAAG  
AGTATTACCAACAACACCAAATCATAATGAG

>novel\_circ\_000284

ATTTTATTATTAATGGCTCCGACTATTTACTTGTCTGGAGATACCTGTTGTAAGAACAT  
CTACAATCCCATGTTACGGCGAAGACAAAGGATTCATAATGGAGCTGTTGCAAAACA  
ACAAAGGCTAGAAATTAGACGATTAGAAACGAATGAGTCCTCACGCGATAATGGGTCT  
TTGACACCACCGGAAAATTCTCTCTGGGAACCAGAAAATTCCAATGACTCCTGTGATC  
CGACAATCGTTAGTTCTTCTTCCAAATGTTTCTGCTAGAGTTCCAGTGGACACAAAG

GAACACTGGAAAGTGTTTCTAGCGAGACGAAAAGGTCTTCTAGACATTGTCGTACGTA  
CTATGGCTCTGATACGGCGAAACAACATTCTTCAAGAAAGAGTAAACGCCCTGCGCGC  
AGAGACTCGAGACTTTATTCAATTCAGTATTGAACAATCCCGAAAACAAGTGTATACAAC  
AAAGATTGGATATTATTGACTGCAAGGAAACGGATGTGACCTCGTCGACGGAGAAAAC  
TATACCAAGACCATCGCTTCCGCCCACACCAAACCTCGATAAATCCTCGTCAAACGACG  
TCACGTCAACCTGTAGTAACAACGAAAACGACTCTGAACAATCCGACATCGAATCGTA  
ATGTTTGAGAATCATGGCGTAAGAAAAAGAG

>novel\_circ\_000286

AGTCGACGAGCGACGTGACGGAAGGTGTTTACGCCGGCGAACGTGCCCCGATTGGTTT  
ACGGGGTGTTTACGACCCCTGTGAATTCAATCGGGGGCTCGGCCGTCTGCGCGTTCTC  
CATGAAGAACGTCCTCGAAGTCTTCCAGGGTGCGTTCAAGGAGCAGGAGACCATAAA  
CAGCAATTGGCTACGTGTACTTCCGGAAAAGGTGCCCCGAGCCAAGGCCTGGTGCATGC  
GTGAACGACTCCAGAACGCTTCCAGACGTGACCGTAAACTTTGTGAAAGCGCACCCC  
CTCATGGACGACGCGGTCCAATCCTTCTTCTCATTACCTGTGATAACCAAAGTCAGCTT  
CAATTACAGATTTACCAAAGTCGCCGTGGATCCTCAAGTGAAGGCGTTGGATGGCAAG  
GCCTACGACATTCTGTATGTCTGGGACAGACGACGGCCGAGTTCTCAAAGCGCTCAACA  
CTCGTGACCCGGATTCACTGAGCAATGTTAGCCAGGTCATCGTAAGCGACGTTCAAGT  
GCTGAAGTATGGACAAGCGATCAAGGATCTGTTGGTGGTCCACCTGGCCGGCGAGGCG  
AGCAAGTTGGTCGTGTTTGCTGACTCCGAAATTCGCGCGGTACCACTGCATCATTGCG  
ACGCCCCCTGCGGCGGCCACCTGCGCGTCTTGCGTCGGTCTTCAGGATCCTCACTGTGC  
CTGGGACGCGACCAAGAACCTGTGTGTGGCCGTGTCGACGAAACTGCACGACAGCGA  
CGCCGACAAAACCTGTTCCAGGACATCGTGAACGGGAGACACAAGGGATGCGGCTA  
CGAGCCAG

>novel\_circ\_000288

ACTTGTCTCCGGTGCGATGGGCTCGCCGGAAGTCGTCTGAGCTCCGAGTCGGAGAGGA  
ACTGCTACAACGTGCAGACGTCTGAGGTGACCACCGAGCGGAGTCCCACCAAGAAGA  
ACAAAAAGAGAATCCAGAAAGAGAGGCGGAGGGTATGCGAGAAACGAAACCCGTTG  
TTGGACCGCGTGAAAAATACCAGGTTGAGCTTCTTCAAGGATCGAGATTCGGACGAGG  
AGGAGCAAGAAGAGGACGAAGAGCCGAGAAGCTGCAATTTTCGTTCCATGTGCGAGT  
TGAACCAGCACAGCCTCACCAGAAACGAGTTTCGTAGATCGGTCTGTGAATCAGATTT  
GAAAGAGATCATCGAGGAGGAGAAAACCTCAGGCAAAGAGGAAAAGACGGTTCGAAAT  
CGCAGAGCAGATTACCTCATCGAAAGCAGCAGGAGGATCGCTCCTCGTTCCTGGGTCT  
GCGATCATCCGCTGGCCAGAAGATGGCGACTTTGTCCGACGACATAATCGAGGAAACC  
GTAGGTCAACAGAATCGAAGGTGGCGGAAGAGTAGAGAGTTTCGTTTCAGGATCATCAG  
ACACCGAGACGGTTCGTCCATGGATCACGTTCTAGAAGGTTCTACCAGCACCGAGGATG  
CAACGTTCAAAGATGGCTCTCAGTTTGACAGTATAACACCGTCGAGCTGTTTGGCAGC  
CAAGTTTCGGGCAATGCAGGACAAGTATCTGAAAAGTTCCACCAGCAAGTTAATAGCG  
AAGATCTACAAGAAGGAGGGTAAGGACAAGGAAAGAAGAAGACTGAGGAGTTTCTC  
GTACGGCACTTTGCCCGGCCTCGAGGAGCTCAGAACGAATCCCCTTTACGAGGAACAG  
GATCAGGATGACAACGATTCCGGTATCCTGGACAACGACTCCGCCACCAGCTCTTTGC  
TCGACGACAGGTGCAGCAGTAGCGCCTCTGGACTGTTAACCACGCTCAACGATTTCGTC  
CTTGAATTCACCACCCAGTTACCACCGAGGAAACCTTCGTCCTCCATCGTGGACGTT

GAAAGAACAGCGAAGATGTTCTCCAGTTTGGACGTCTATTGTGGAAGGAACGAGGGG  
AGAGGTTGCAGAAAGGACATGTCCAGGTTTAACGCTCTTGAAGATTCCTCGAGCCAGA  
TCTGTCAAGCTGCGAACAACGAACTGATAGATCGACAGGATCGTGACAGCTCGAAATT  
GTCCGAAGAGAAGAACGTGATCGAGAGGTTGAACAGTAAAGACTGTTTAAGGTCGGA  
GAACTATCAAAGCTCCAGGCTTTCTGTTATCAGGAACAGGTCTTACACCACGGAGACG  
ATGGTCGTGAAGCTTCCTAGAGAGAGTTCGGATCAGTGTCTGGGCATCTTCATCGCGA  
AAACAGCGGAATCCAGTCCCGGTTACCTGGTGGCTCATGTAGTGCCTAATGGGTTGGC  
CGATAAAGAAGGCACCTTTGAGGATAGGCGACGAAATTTTGATAGTTAATGGGAAGAGG  
CTACGAGGGTTGAGCATGGCCGAGGCTAGGAAGATTCTTGGAAGCGGAAATGGACCT  
GGCGACGTGGACATCGTCGTCTCCAGGTACTCGGCTGTTGACCAGTCCCCTAAGAAGC  
TGACAGAGAGCAGCGTTGACTACGAGAACGTTTCATATGGAGAATGGCCACGGTGTTCAT  
CGTGGAGAATTCACCTGGTACGCACTTCAGAAAACATCAGACGAAGCATCATCGGGAC  
AGGAAGAACGAGTGTAACAGGACTGGCTCCTCGGATAAGGCTGTCGTGGAGAATGGT  
ACGAGCTCTCAAATGTTTCGAATTTTGCACGCTGCCAAGGAGGCCTAGGAACACCG  
TCTCGACGTTCTCACCCTCGTGTTCAGAAGGGTCCTGGAAAGAAATCGCTGGGATT  
CACTATTGTGGGTGGAAGCGATAGTCCTAAGGGAAGCATCG

>novel\_circ\_000289

GGAAGAAAAAGAAATTATTTATTGTTGAAGAAGGTGGTCGAAAGTGAGTCGAAATTAA  
AGGTTGAAAATTTGCCAGAGGTTCTGAGAATTTCTCGAGGTGAACGTGAAGGGGTTGC  
GTGCATTGGGCGCAAGAGGGTGCGAATTAAGGGGACGATAATGCACGAGAATGAACG  
CGAGGGAG

>novel\_circ\_000290

GCATGCTATGCGTCAGAAGACTGGAAACAGATGTTCTCGCGAAAGATGACAGGGTTAA  
GTAGATAAAAGGAGCAGCTGCTGGTTCCAACGACGATTCATCGCGTTTTCCATGCAGT  
GCACAATGCTCTGCCATCGCGCCCTTGTCGTTCTCTTTGCTGTCAACGTGCCAATCGGT  
AAGTGAACGGGTTATACGGTGTGCTTTGCCCTTCACTGTCCCGTTTGTACTCATCTTGTT  
GTGAGAGCAGAATCGGGCTCGACTCGATTTTCAGAATTTTACTCGATATCGGCTGCCTTC  
GTCTCATTGAATTGCTCCGCGTTCAGGAATTAATTATTCCTGGGAAAAATTAAGTGTTC  
AGGAACAGGAAATTTTTTTATCGATATTCAAATAACTCAATGAAATAAAGAAATAATAC  
AGATATGTTAATTGGGCCTGAAGAATGGAAAGAGGATATTAATTCGTGAATCGATTTTA  
TAAGTGATTGTAATCGTTCCTTTTTATAAGAGATACGTTTGTTCGAAGTGATCGATTTT  
AACCGAGGATAAAACGAATCAATAATTGATGATCGTCGTTTTTCATCCGTGGTGAAATCG  
ATCCGAGGTGAAATCATCGGACTCAATAGAGATATATGGACGCTGTACAGCGTTTAAAC  
AATTGCTCGATAAAAGATGGAGGATCTTTTGTTCGTCGAAACGGTAAAAACGAGCGT  
ATCCTATGCACGTGTCGTTATCCCCGATTTTCAGCTGTTAAGCTTTTGTATAGATGGGAA  
AAGCGGCGGATATTTCCGGAAACGGAATATATCTTACAAACCGTTTCGATTTCGATTG  
GTTTCTCATCAGATCTTAAATAAATTCCGTGAGAACGATCGAGAACGAGAATTTGAAAT  
TGCATGCACAGAGGGAGCCGCGGATGAGAAATTCAACTTGTCACGTGCTATCGATATT  
GGAATCATTTTTTATTAAATTCCCTTACACGCCGCCAAGAGTTTCATATTTTATAAGAAA  
TAGTTTTGTGATTCTCAAAGGGGAATGAATAGAGGCGTGGTTTATGAATTTCAAATAAA  
ATTACGATTACGGTGCTTCAGTGCAGTGTATTTTCCGAGTACGTGTCTCTCTTTTTT  
TTTTTTTAAAGTGGAGAAGAATTGTTATTACATTCTCTTTTATTTATTCTATGTAAATGTG

AATTTTCTTTTTTTTTTTTTTTTTTTGTTATATTTGCGTGTCACTTATGAAATTCTTGTTGCGT  
CCATGCGTTTAAAAAAGTTATTCGTAAAATTATAAAGGACGCTTCTTACCACGTGCCTG  
ATTATTAATCTGTCTCTATTTCATTGCTTTGTATTATCTTTTTTTTTTAACACTTTAAATCAAT  
AATATTTACTTTATTTTGTATTCTAAATTAATTTTAGATATAATTGTTTCGCAATTATTA  
GTATTTCAAGCAATAATTTGTAATTTGTTTTACGAGAAAATGTTTCAAAAAATCAAAAAATC  
GCATAATTTTCATTAAAAAATAAAAAACAAATTTAAATTTTCATTTCATGTCCACTTACGGA  
AAAATTAATAACTTTTCATATGAAACATTTTTTCGAGTTATTTTCGACTAGTCATATCGTTCT  
TTAAAGATTCATCTTCTATATATATTTCTCTCTATTTCACAATTTTTTTTTCTTTAACTCTCT  
GTCTCTCTCTCTTATAAATTTCAATTTTCATTCTAGGATGATCAGAATTACCCCATCCTCGA  
CTAAAAAATCCATCCAGAAAGACGAAGAAAAAATAACAACCCCTCTCTTCTTCTTC  
GAGAATAAAGAAAAAAGGGGAACGGATGCGAACACGCCGCGGATGGAAGCACACT  
CCCTCCCTCTCCCCCTCCCAAATTCGCTCGAAGTCAATCATCAAACAGTTCTCTTCGG  
GGTAAACTCGGGAATTGGGGCGCAATCGGTGCGCGCAAAGCAGTTAGAGCCCGCTA  
ATTTGCGCCGAGGCCTCCCCGCCGAATTGGATATCAATTCGTATATCGCGCCGATTTCGCGG  
ATTGCGATCGACACAGTTCGGGTTTGTACAGCGAAATCAAACCCCTCCCCTCCTCCTCCT  
CCTCCACCGTCACCGCGACGTCCGATGCAGATGCAAGGGAGGGGGGCCGGGAGGAAG  
AGAGAAGGGCGCGGAGAAACGAGATTTGGAAACCTGTGCCAAACACGCGGGGAAGG  
TTTGATGAATTCCGGATATGCGCCGGGATCCGGAACCGACATCCACGAGCGCCAAC  
GAGAGGAGGACGAACCCGGTCAACTTCTGCCGTTGATGTTTATTCGCCGAGAGCAACG  
GGGGTACGGCGACTGGGCTTGTCGTTTCGTCGCGAATTAATTCACCGTTTCCGGGTCCC  
GAACCTTTACGGCTCTTCGACGAGATTTCGAGGCTCGTCGTACGCCCTTCGATTCCACCC  
TTCGGAATTCTAGCAGGAATCCGGCTGGATCGGAATTCTCCTCCTAAAAAATAAATTG

>novel\_circ\_000291

GCATGCTATGCGTCAGAAGACTGGAAACAGATGTTCTCGCGAAAGATGACAGGGTTAA  
GTAGATAAAAGGAGCAGCTGCTGGTTCCAACGACGATTTCATCGCGTTTTCCATGCAGT  
GCACAATGCTCTGCCATCGCGCCCTTGTCGTTCTCTTTGCTGTCAACGTGCCAATCGTG  
ACGGGACTCGAGCCAGACTTCGTATACCCGTTGGAGAACTTAACGATCTCGCAGGGTC  
GAGACGCAACCTTCACCTGCGTGGTGAGCAACCTCGGTGGATAACGGGTGAGTCCTTC  
CTCCTCCGTGAGCGGAGATCACTCTGGCGGCGCCAAGGCCCGG

>novel\_circ\_000292

GCATGCTATGCGTCAGAAGACTGGAAACAGATGTTCTCGCGAAAGATGACAGGGTTAA  
GTAGATAAAAGGAGCAGCTGCTGGTTCCAACGACGATTTCATCGCGTTTTCCATGCAGT  
GCACAATGCTCTGCCATCGCGCCCTTGTCGTTCTCTTTGCTGTCAACGTGCCAATCGTG  
ACGGGACTCGAGCCAGACTTCGTATACCCGTTGGAGAACTTAACGATCTCGCAGGGTC  
GAGACGCAACCTTCACCTGCGTGGTGAGCAACCTCGGTGGATAACGGGTGAGTCCTTC  
CTCCTCCGTGAGCGGAGATCACTCTGGCGGCGCCAAGGCCCGGGTGCGTGATCAA  
GGCCGACACCAAGGCCGTCCTGGCGATTTCACGAGCACGTGATCACGAACAACGCCCG  
TTTATCAGTTACACACAGTGACTACAATACGTGGACGTTGAACATTTCGTGGGGTACGCC  
GAGAAGACCGGGGCATTTATATGTGTCAGGTCAACACGGATCCTATGAAGAGTCAGAG  
TGCGTTTCTCGAAGTGGTGATAACGCCGGATATAATATCCGAAGAAACCTCGAACGACC  
TGATGGTACCCGAGGGTGGGTCTGCAAACTAGTATGCAAAGCCCGCGGTTATCCAAA  
ACCTGATATCGTTTGGAACGGGAGGATGGCGCCGAGATTATTTCCCGTGCCGATTGT

CTGGTGGCAAAACGAAAT

>novel\_circ\_000293

TGACGGGACTCGAGCCAGACTTCGTATACCCGTTGGAGAACTTAACGATCTCGCAGGG  
TCGAGACGCAACCTTCACCTGCGTGGTGAGCAACCTCGGTGGATACCGGGTGAGTCCT  
TCCTCCTCCGTGAGCGGAGATCACTCTGGCGGCGCCAAGGCCCGGGTGGCGTGGATCA  
AGGCCGACACCAAGGCCGTCCTGGCGATTACGAGCACGTGATCACGAACAACGCCC  
GTTTATCAGTTACACACAGTGACTACAATACGTGGACGTTGAACATTCGTGGGGTACGC  
CGAGAAGACCGGGGCATTTATATGTGTCAAGTCAACACGGATCCTATGAAGAGTCAGA  
GTGCGTTTCTCGAAGTGGTGATACCGCCGGATATAATATCCGAAGAAACCTCGAACGAC  
CTGATGGTACCCGAGGGTGGGTCTGCAAAACTAGTATGCAAAGCCCCGCGTTATCCAA  
AACCTGATATCGTTTGGAAACGGGAGGATGGCGCCGAGATTATTTCCCGTGCCGGATTG  
TCTGGTGGCAAAACGAAAT

>novel\_circ\_000294

TGACGGGACTCGAGCCAGACTTCGTATACCCGTTGGAGAACTTAACGATCTCGCAGGG  
TCGAGACGCAACCTTCACCTGCGTGGTGAGCAACCTCGGTGGATACCGGGTGAGTCCT  
TCCTCCTCCGTGAGCGGAGATCACTCTGGCGGCGCCAAGGCCCGGGTGGCGTGGATCA  
AGGCCGACACCAAGGCCGTCCTGGCGATTACGAGCACGTGATCACGAACAACGCCC  
GTTTATCAGTTACACACAGTGACTACAATACGTGGACGTTGAACATTCGTGGGGTACGC  
CGAGAAGACCGGGGCATTTATATGTGTCAAGTCAACACGGATCCTATGAAGAGTCAGA  
GTGCGTTTCTCGAAGTGGTGATACCGCCGGATATAATATCCGAAGAAACCTCGAACGAC  
CTGATGGTACCCGAGGGTGGGTCTGCAAAACTAGTATGCAAAGCCCCGCGTTATCCAA  
AACCTGATATCGTTTGGAAACGGGAGGATGGCGCCGAGATTATTTCCCGTGCCGGATTG  
TCTGGTGGCAAAACGAAATTAGCAACCGCCGAAGGGGAAACGCTGACTCTGTGAAA  
GTAACCAGAAGCGAGATGGGCACTTACCTGTGCATCGCGAGTAACGGAGTACCACCAT  
CAGTCAGCAAACGGATGATGTTGCATGTGCACT

>novel\_circ\_000295

AAATTATGCGTGAAAGAGAGGAAGAGGAAGAGGCGAAGGAAAGGAAAAAAACGAA  
AGAAGAGCAAGAGAAAAAGAAGCAGCTTATCAAGAACGTTTGAGAGCATGGGAAAC  
ACGGGAACGTCGTAAACAAAAAGAATATGAAAAAGAAACGGAAAAACGTCGAGCAA  
AACGGGAAGCACGAGAAAGAGAAGCAAACGATTGAAAGAATTTCTCGAAGA

>novel\_circ\_000298

GAGAACATCGCGGGGGCGTCATAGCCGAAACGCGCGTAGTAGTAGCGAAAGAGGAC  
GCATTTCCGCTTACAGCGGAGTCTCCGATCACGCCGATAGTATGGACAATCCTTCCTCG  
CGGGAAGATATTTAGAAATGGTGACGCAAAATATTTCCAGTAAGCCAAAGACGTCAA  
ACATAAACAGGTCTGAAAGTTACAAGGAGCGGATACATCACAAGCGACAGCTACGAG  
AGAAGAGAAAGACCAGCGACCCAAATCTCTCTAAACGAA

>novel\_circ\_000300

ATGCCACAGACGGTACCTACCGCAGCCGGCTACTCGCCGTCGTTTCGATTACAGCACATT  
CCAATTCGATTTATCCCTTCTTTTCGGACGATTATGCCGCGACGAACGCGCAAAACACGT

TGAAACCAGCTCAAATCAAACAGGAAGCGCAATCGCCGCGTCCCGGCTCACCGACCA  
CGTACTCGAGCTCTCCTTACCCCGGCGCCGGCGGTGAACTGTCCCCTAATTACTCGCAC  
GAGGGTTACCAGGATACCCGACCAGTCCCTACTACGTACCCAGAAGTCCTCAAAGTG  
CTCAATTCTACCCGACAAGCCCAGAACCCTCCGCGAAACAGCCGGTTAAAAGGGAGA  
AGAGCCTCGATCTTCTGGCCATCTTGCAAGAGTCCAGACTTCTGGCCGAGAGTCTGGG  
ATACAGGGAGGACTCGACCGACTGCACAGTGCCGTGCACACCGCCAAGAACGGAGGA  
GGACATTTACAACAGCCTTGACGCGGACTTCTTCGCGAAGAAAGAGGATACCGCAGTG  
CAAGGACACCCGTTGCTGAAGGAGATCCTCTTCAAGTCGGAGCCACGGTCGAGCTGC  
AACAGCAGCAACAGCAGCACAACGAGCAACACCAGCGATTCTTCGTCCACGTTGTCTG  
TCCTCCCGCTCGAGCGCTTCCTCCTCGCCCGACCCCGTGCAACTCGAGAACAGCTCGC  
CGTTGAGGAGCTTGCTGTTCAAGGGTGCCAGAAAGGATCTCGCGGACGGAGCGAGAA  
CAAATGTTCTGAAACTCGAGAGAATACAGGACGAAGTGAGGAATCCTCTTCAGAAGG  
AGGAGGAGCTGTTCAAGGACGGGCAAAAGAGCGATCACCAGTTGCTCAGGGAGGTTT  
TGAGGGACACCAGCTTTCAGAGGAAGTACAATCTGAGACCCGTGGACCTGGGCAGCG  
TGGGGACAGGGTTTCGTCTGAAGACATGGAAGCCGGCGAATGCGTCGGTGACCTGACCA  
GGGAACAGATAGAGCCTGTCTCAGCCTGGCCATACAACAATTGCAAAAAGACTTTGA  
CAACACCTGTGTCTCGCGCTTGGTATTCATCCTG

>novel\_circ\_000301

ATGCCACAGACGGTACCTACCGCAGCCGGCTACTCGCCGTCGTTTCGATTACAGCACATT  
CCAATTCGATTTATCCCTTCTTTTCGGACGATTATGCCGCGACGAACGCGCAAAACACGT  
TGAAACCAGCTCAAATCAAACAGGAAGCGCAATCGCCGCGTCCCGGCTCACCGACCA  
CGTACTCGAGCTCTCCTTACCCCGGCGCCGGCGGTGAACTGTCCCCTAATTACTCGCAC  
GAGGGTTACCAGGATACCCGACCAGTCCCTACTACGTACCCAGAAGTCCTCAAAGTG  
CTCAATTCTACCCGACAAGCCCAGAACCCTCCGCGAAACAGCCGGTTAAAAGGGAGA  
AGAGCCTCGATCTTCTGGCCATCTTGCAAGAGTCCAGACTTCTGGCCGAGAGTCTGGG  
ATACAGGGAGGACTCGACCGACTGCACAGTGCCGTGCACACCGCCAAGAACGGAGGA  
GGACATTTACAACAGCCTTGACGCGGACTTCTTCGCGAAGAAAGAGGATACCGCAGTG  
CAAGGACACCCGTTGCTGAAGGAGATCCTCTTCAAGTCGGAGCCACGGTCGAGCTGC  
AACAGCAGCAACAGCAGCACAACGAGCAACACCAGCGATTCTTCGTCCACGTTGTCTG  
TCCTCCCGCTCGAGCGCTTCCTCCTCGCCCGACCCCGTGCAACTCGAGAACAGCTCGC  
CGTTGAGGAGCTTGCTGTTCAAGGGTGCCAGAAAGGATCTCGCGGACGGAGCGAGAA  
CAAATGTTCTGAAACTCGAGAGAATACAGGACGAAGTGAGGAATCCTCTTCAGAAGG  
AGGAGGAGCTGTTCAAGGACGGGCAAAAGAGCGATCACCAGTTGCTCAGGGAGGTTT  
TGAGGGACACCAGCTTTCAGAGGAAGTACAATCTGAGACCCGTGGACCTGGGCAGCG  
TGGGGACAGGGTTTCGTCTGAAGACATGGAAGCCGGCGAATGCGTCGGTGACCTGACCA  
GGGAACAGATAGAGCCTGTCTCAGCCTGGCCATACAACAATTGCAAAAAGACTTTGA  
CAACACCTGTGTCTCGCGCTTGGTATTCATCCTGAGCCACGACGTTGGAGCGCCGCGGAC  
GTAGCAGCCTGGATCCAATGGGCTAGAAGGCAACTGCAATTGCCATCTGTCCCACTGG  
AGAGCTTCAACGTGGATGGCGCTACATTGGCTTCCCTCACGGAAGAGGAATTCTGTCA  
GCGTGCCCCTCAG

>novel\_circ\_000302

CTGGTTCGGCAGCCGAGAAGGGATACTTTGGTCCGTGGAGGCAGTGCAAACCTTCTGTT



ATACGGTAGAGAAAGATGCGGCCAAGGGGTTTCCAGGTTTCAACCAGTGTTGGCTGTG  
TGGGTGGCAGGATTAGCTGCTGCGACCGCCTCCGCCCTTTTGGCCATCCTGGTGGGTCT  
TGCCGTGCTACAACCTTGCGATGGCCTCCTCGGCAAAGCGAGTTATTATCTCGTACAGCA  
CCGCTTTGATAGGGAAAGTGGCACTCGCCACATTGGCCACTTCGTTGGCGATCGTGGC  
GGCGAGTCTGTTTCGCTTTACAGACCGATGACAGAGCCAGCAGCTTCGTTGTCACGAGG  
GGAGAAGCGTTTTATATGCAG

>novel\_circ\_000303

GTAAGCACTTGTTTATTTGTCTCGTTGAAGCCTTGCCTTGGATACCCTGCCGTGAGTAAT  
GGTTTGATATTAATAAAAGAGGATTGGAAGTTGTTGAACGATTAAGTCGCTTAGTCAT  
ACCGCGAGCGCAAAGTAGGTTGTTCTGGGAAACGTTCAAGTAGCGGATGGGGTGGCTT  
TTGTTGAAACAAAGGGATCATTTGTTTTGTTTTCTCCAATGTTTTATCTGATAATACAGG  
AAAGAGAATGCAAGATATCGTTTAATAATAACGACGAGATGATTCCTTTAGTTTTAGAC  
TTCTTTTCTTTTCTTTTTTTTTTTTATCGTAAGTTTTTATCATACTCGCTTCTCCAACGAA  
TTTTAATTTTAATTACAATGAAACGTATATCTGTATATGATACGCGTAAGATAAATTTAAC  
ATCCTCGGACGGAATCGATTTATTATTTATTTGGAAACGCGTAAAAATTTCCCGTTTAAC  
AAAAATATTTATCTTTAAAATTTTGAAATTAATATATATATATTTCTTCTATATCTTTATTTC  
AACGAAGGAGAAACGTATTTACTCTCGTACCCTTTGATTTCAAATTTTAATTAATTCGAG  
TCACGCCATAAATAAAATACACGACGTAGGAAAAACAATGGACGGCGAAGCGTCGCC  
GGATTACGTTTAGGAAGAAGGGAGGAGGAAAACGGGACGGGATCGAAGATAAACGTA  
AGGCAACCGAACGTAAATCGCGAGGCAATCAAACCTGAATTTTAATTCGAAAGGATATC  
GAGCGCGCGATATTGGGGAAAAAATCCAACGCGAAGGGGGAAGAAGAGTGGAGGAG  
AGATAGAGTTGGGGGGGAGGAGGATAGAGAGGGACGCGGATATCGTTTCGTAATCGAA  
TCGCGTTCCACGTGGATGGAGGACACAGAAGGGAGATCGCAATCCCCAGTCTGCTTTC  
TGTTCAACGGGGGATGGTCAAGCCCGCTTTCACGGTCCGTGCCGCGCTTCGTTTCGAT  
TGTTTCGACGTATCGATACTCGACATCGGCCATGCCCCGTCTATTATTCGCCACGGCCAATG  
GCCACCGTTTTATATATATATATATATATATATATATATATATATATATATATATATATAT  
ATATATATATATATACTACAGCCTTTATGATTTGTTACCCTGTTTTTCGATGTGTGTTGTTAT  
GACCAACGAACCTTCGGGATTATCCTTCTCCTCGAGCTTCCTGTTTTTCAACTTCCCTTTC  
ACACTTATTTGAGCGATAATGCTCACGTTTTTCTGACGCGGCCGAGGGATAATTATTTCT  
AGTAATGGTCGAACGAATGGATAGCTTTATGCGATAAATTTTGTGAGAAAGGGGGATGA  
ACAATTCCTGGTTACATCTGTTCTTTGACAACGAGTATATTTTCAAGGAGAATTAGAC  
GTACAGTTTTTATATCCTTCAGATTTCATTTTATCAGTATCCCTTTTTTTCGAGCATAAAC  
AATCTTTAACAATTTTCCACTTAATAATCGGGAAATAAAACGTGCAGAAATAGAAAGAT  
TCCTTTCGATTAATTATTTAATCAATTGTTCCGCGAGTTGCATTTCGAGTTGAGGGTAAAA  
CGTTAAAGAGACACGCATGTTTATAAGCACAAACCATGAATACGCGCGATCTTCAGCTTC  
GTAATCTTTTCCCGTGTTAATTCAAATAATTCTTCCTCCGAACCTTTCATCCCCCGATGA  
ATTTGTTTCGTTAACTCGAGCCGAGGATGCCGATCGTTATCGCGTCTAATTACGTTCAATT  
ATGAGTCCCCTACGATCCCCTCTCGCGTCGTTGAATGCCAACCACGTTTCGCCGACAATT  
TACACAAATTTAATCGGGGCGCGATAAGCCGCGCGGTTCCATCTCCAGCCGAGTGTTTCG  
AATCCAGAACTCTGAGCACAACCCGAGAGCAAGGCGAAGAGGATCGTACCAGGTGC  
AACGTACCATTACGAAGAATCAATGGAGGATCAAGGGGAGGGGAGGGGAAGGAAGG  
GGAGAAACGATACGGGAACAACGGCCTTTTCGCGCTTGGCATATCCTATAATCCTCCGT  
TTCTCCCATACCCTGTTGTTTCTCCTCCGTCCGCAATTTATTATATTTCCCTCTTCTCCCT

```
>novel circ 000304
```

ATTTCTGAATAGACAACACAGACCATATAATAGACGTGAACAAGAACAACGCGGCGTTC  
GAGTACGATCAAGTGAACATAATATGTCTGTGTACCAGCCAGGAACGTATGACGAGG  
ACGCGGAGAAGTATATCATTTACAATGTGTCCAAAGAGGAGTACGAAACATGTTCGGAT  
AACAAATCCGAATCCGCGAGTGATAGCGGTCTGTAACAACCCGTATAAGACTATGTACT

TCACGATCACCTTCAGGCCGTTACACCCGCAACCCGAAGGCCTGGAGTTCCTGCCAGG  
CCACGATTACTATTTTCATCAGCACTTCGTCCAAGGACGACCTCCACAAACGCATCGGTG  
GACGATGCACAAGTAACAACATGAAGGTGGTCTTCAAAGTGTGCTGCCGCAACGAAG  
CTGACACCTCGTCGTCATCAGCGACATCGCGTAACAATT

>novel\_circ\_000306

ACTCGACAACCTATATTCGTTCAATTACTTCATGCGGCTTTTAAAGTTTCACAATGCTCA  
TGGCTAAATGCTGGTCAAAGATTTAATGTTGAAAATTGTATACGAACATTGTCGGATGT  
AGGTAAAGTTTGTTTGAATTGCTTGTTTGAATTGAATTCATTGTATGAATTTAAGACTTTC  
CTGGATATTCATTTTATATTTTTTAAAATGTTATTTAAATCATCAGCTAAAGGGAGAGGTA  
TAGCCATTCCAACAGATTTAGAAAAGCCAAGTTGCTTCTATGTTTAATAAAGCAGCAATG  
CTTAGTAGACAAACAAGTAAATGGCTTCAAGCTGCGAAACAACCAAAGATAGAACGTA  
CACAAAGTCAGGTAATTTTTCTTGAAAGACTTATTCCAAAATCAGTTAATTAATAATTT  
TTTTTATTTTTATCAATTTTTATATTATATATTGAATGATTGTAATCCATTTATAATTGATATG  
ATCTTTGAATGTATAGAGTGACTTAATTTGTGAGGAAGATAGGGAAGAAAAAGATCAG  
GTATAAGTCACTCATAAAAATTTGAGTTTAGTAGCTTAATATGATTTTAGTGCTTTAGTGT  
AGTTCAATATTAGTGAACCCTAGTTTGCGAATAGTATCCACAAAACACTACGAACAAATAG  
GATATTGTATGTATAATAAAATAATAAAATTATTACTAGATATATAATATATTAGAAAAAAT  
ATTTAATTATTATGATATTAAATATTTTGTTAATCATTATGAAATAATATATCTTTATATAGCT  
GATGCGTTTGGATCGAAGTATCATAGAAGGTTTACAAGATATAGTATCGTTATTAGAAGA  
ACAATTGAAACCACTAGTTCAGTCAGAATTGTCTTTATTAGTGGATATACTCTATCGACC  
AGAATTACTATTTCCAGCTGCGACTGACGCTAGAAAACGATGCGAAAATGGCGGCTTTA  
TCAAAAGGTGAGTAATTTCTACAATTGATATTATTTTAATATATTTTATCATCAATAATTC  
TATATTGTTTAGATTAATCAAACATACTGAAAAATTACTTGAAGAGAAGGAGGAAAAAAT  
TATGTGTAAAGGTGTTAAGGACTCTTAGAGAAATGATGGCTATTGACCCTGAATATGGA  
GAAAAA

>novel\_circ\_000307

CGCCTTACGAGGGTGGAATATGGAAGGTGAGGGTTCACTTGCCCGAGCACTATCCCTT  
CAAATCTCCTTCGATCGGCTTTATGAACAAGGTATACCACCCTAACATTGACGAGGTCT  
CAGGCACAGTGTGTCTAGACGTAATAAACCAGGCCTGGACTGCCCTTTACGATTTGTC  
GAATATATTCGAGTCTTTCCTGCCCCAATTGTTAACATATCCTAATCCAATCGACCCCTTA  
AATGGCGACGCCGCGGCCATGTATCTACATAAACCTGAGGAGTACAAGAAGAAAGTAG  
CAG

>novel\_circ\_000308

CTGGCCTTCCTCTGTGCAATTATTCCTTTGGATATCGAGTTTTGAGTTACGATTAGAAACA  
AATTCCTATTTTATTCGACGACTCGGAACTCGCACAGTTTATCCATAACTCACCCTACC  
GGCTGTATTACTCTGAAAATTCCTCGGAAGGCGATGCTTTCTATCTTCGTTCAACGATTC  
GATTAAAAATCTTTTGTTAAAAAGCTACACAAATGCCGAAATCGGCAACGAAGTGGAC  
ATTTTGAGTCAATTTACGTGACGTATTCACAAGTGTCAACACGAAATATGCTATTATTCT  
AAAGTTTCTCTTATTAACCTCGTATCATTTAAATTGTATTTTTCCATATTTCTCATGAAGTG  
CTTCAATTTTTTTTCGTATATTTTTTATATTAAAGTGCAAGAGACCTGTTGGCGAAGAGAA  
CGAAGAGAATAAGAAAGGAAAACGGAAACGAGCAGCGGAAACAGAAATCGTGGTAT

CGACAAAGGAAAAAGAGGTTTCGGCTGTGGAAACGAAACGGAAAACCATGGAACAC  
ACGCTAACAAGATGCGACACTCGTTTACCAAAAATCACACCAATTATTGATGACTATGA  
GATCAGTAATCACGTGCTCGGTCTTGGAATAAACGGAAAAGTTGTTCAATGTTATGACA  
AAAATACCAGGGAAAAATATGCGCTCAAG

>novel\_circ\_000309

CATGGTAGAAGATAAAAGATATGAAATTGACAGTCGAATTGAGTGTGATGGACATCAA  
GGTACATTAAAGTACATTGGTCCTGTTGGTGAAACTAAAGGTTTGTGGCTTGGTATAGA  
TTGGGATGATCCAACTCGTGGAACATAATGGTACATATGAAGGAATAAAATATTTTA  
AAGCTAGATATCCTACATCAGGTTTCATTTATACGTCCTGGTAAAGCAAGATTTGGAATTT  
CTTGTCTCTGAAGCTATTAAAATTCGTTATGGTTTCATCAATGATGAATTAGCTGGTATTGA  
TAGAGATACATTAATAAGTTTACAAAAAGAAATTAATGCTCCTTTTTTGGAAAGTTGTTG  
GTTTTTCTAAAGTAAATAAAAAACAAAGCAAATTTGATCAATTAATAATATGGTTA  
AGAGAACAATGTGTTAGCACTGCGGGTGATTCTGGTGAATTAAGAATTATGTCCCAA  
TTTGAAGAATTAGATATATCTAAAAATTTAATAAATAGTTGGCAAATTGTAGCAAATAT  
TTGTTGTCAGCTTCATTGTCTTGTTCGACTTAATGTGAGTGAAAATTATTTGCCGATTGA  
AAAAAATATGGAAATATTAATAAAATTCATTTTTTATGGTTAAATATTTAACTATGGCAAA  
AATGAATTATAATTGGTTTGATATTCAACAGTGTATGTGTATGTTCCCATTTCTACAAGAA  
CTTTCAGTTTCTTTCAATATTGTTAATATTATACAAAGACCATTAAAAGATGATAATTTAA  
TGAAAATATGTAAATTAACACTTGAAGGAAATTTGATATCCAATTGGGATGAAATTCTTA  
AATTGGATTCCCTTCCATG

>novel\_circ\_000310

TAAAGTGGAAGAAGTCTCACTGGAAGGAAACGCGTTCCATTTTCATTCTACCATGATCT  
GAAGCTCGATCCTAAAGAGAATTGTAAGTTTAATAGGTGGTGGAATAAAAGGGGACGT  
GGAGAGGTGTCTTCCGAAGGCGAGCGATTTTCTTCTTGCGAACAAAGAGAGTCGAGG  
CAATATCGTTTTGGACGGAGATTTGGCTACATGTAATTGGACACATCGAATTTGCATCGG  
GTTTAGATGCAAGCGGCCGACATCCTTGCGATTCCACCGTTTATAAAC

>novel\_circ\_000311

GAATTCGCGTTTACAAGAATGTGGACGAGGAGAGCGGGAGAGAATGGAGATCCACGG  
GGCGTACGAGGTCACGGAGGAGACGAGTTAAACAGCATCCAACATCCTCCTCCCCCTC  
CTCCTCCTCCGTATATGCGCACGGAGGCTATTCTCCGTCCGAATGCATCGAGCGGCAAA  
TGTTCTCCTTTTCTTCTCCTCCAGTGTGGAGGAGGGGAGGGGAGGGCGATTGTTTCAGCAC  
GGCGAAAATTCGGCGATTCCCCGAAGTAAAGTGGAAGAAGTCTCACTGGAAGGAAAC  
GCGTTCCATTTTCATTCTACCATGATCTGAAGCTCGATCCTAAAGAGAATTGTAAGTTTA  
ATAGGTGGTGAATAAAAGGGGACGTGGAGAGGTGTCTTCCGAAGGCGAGCGATTTT  
CTTCTTGCGAACAAAGAGAGTCGAGGCAATATCGTTTTTGGACGGAGATTTGGCTACAT  
GTAATTGGACACATCGAATTTGCATCGGGTTTAGATGCAAGCGGCCGACATCCTTGCGA  
TTCACCGTTTATAAAC

>novel\_circ\_000312

AGAGAGAGGAAAGCCATCATAAAAAGGAAGTGAACGCAGTTTTCTTGGA AAAACTGA  
TGATACGTTCAAAATTTTCAACAATTGAGAAGAACTTTAGCGACAGTTTTTGAAGAG

AATTTTAAGATCAAGAAAGAACTTGTGTATCCAATAAAATGTTGAGTGTAATCAGTGTA  
ATCGAACAGTGTTGAACAATTTTCCAAGTGCTCGATCCATGCAAGAATCTTTCCAATGA  
TCATGCACTCTTCAAGATACATGTATGCAAAACATTCATCTTGTCTCGATGAATCCAGTT  
GATGAAGTTTGGACGATATGTTCAAGGGGAAAAGATTGCGCATCGAAGTGAGAAGCTG  
GTTTCGAGAATGGGTTGCAAGAGTAGCGTTTTTGAATGTGTAAAGGGTACAGGGGAGG  
AAAAGAGAAAAGAATCGGATGTGATAGAGCAAGGATTCCTATTTGGAAAGACAGAGT  
ACGATATTTTGGGAAGAAAATTGTCGTTTCGAGGATGTTGGCGATGAAAAAAATGCAGA  
TTATTCGACGTTGATAGGATCCCACGATACTGAACCCCATCCGTTAACGAACAGTATTCC  
TAGTCTCATAAAAATATTACTGGTCTTCCCCAAAGATGATCAACAAATGGATATCCTTGC  
CACTACTTCGAGGCGTTTGGGATGGAGCGTGTTCAGTTGCGAAAGACGCGGAAAAAGC  
ACTCGAATCTTCCAGGCTCGAGGCCACGAGTTAGTGATCATCGATCATCGGGGGCAA  
CGCGCTGCGGAAGCTGACATTATTTGTAGAGCAATCAGGGCTAGTCCTTTTTATTATAAT  
TCCATAATTATAGCTCTTGTAaaaaaaATCGTATCTCATGCATAGCGAAAGTGAAAAATC  
GTAACATTGGATTTAATGGAAATAGGATACACAAAACTTTAATGGAATGCGCTCACGA  
AAGAATCTTAATAAACGAATTAGTAGGAATTTATACTAGCGGAATATTACCGAGGACAC  
AACTGGTTGCTGTCAACATGCTGTATATGGCTCTTGACAGATGTCGTGACATGATTCAT  
GTGACGGACGATAAATATATTATACAGTTTGCCAATAAAATTAGTGAAAAATTATTAGGC  
TACAGGATTAATGAACTTTGGGGCAAAAACATTACAGATTTAATTTTGTATGATAATTTT  
ATTCAAATGGAGCAACATATAGTCAAAGGCCGAGAATATGATGGGAATATAAACTGTAT  
TCGAAGAAACAATCAAATGTTAACAATTAATTGCAGGGTGATACCTTTCGCCTATTTC  
A

>novel\_circ\_000313

ATAAAAGGTGAACGATTATCTGATCACGATGCCGTATTACAATAGTGGACACAGTCCTT  
CCACCTATAACAAAGATGGAGGATCGAGTGGTCCATCGAGCACATCTGGTGGCCGTGT  
GAGTAGTTCCGAGCCGACATACATGATGGAGCATTTGGCCACGTTACGGGTCACGAAG  
GAAACCGGTATTGTTTATCCAGCGGACGGTATGCGGCGACTTTTGCAATTGGAGAAGA  
GTAACGGCATCTGGAGTCAAAAGATGCAGCTCCGTCTGGAACGGAAGTGGGTACTGAT  
TATGGACAATGAGACAGGGGCCGTATGGAGCGTTTCCCAGCCTCGTTGATACAGGAA  
CCGACCGCGTTACGTCGAGGGATCCTATGGAGATGTATAACAACATTCTCGTCTTCAC  
AGTGGCGGATGACAGTGGTTCCGGTCAACGGGCCGAAATGCATATATTCCAGTGTCAA  
AGTGTCTCGGCACAAGATCTCGTCGAGGATCTGAAGATGCTGCAGATGGGTAACTGG  
TACCCGGTGGTTCTCCAAGAGGTCCAAGAGGACGTATTCCACCGCCTCCCACCTTACC  
ACCGCCAGAACCGCCCTTAAACGGGGTCAATGTCCGAGAACAAGTATCTGCATTTAAT  
GCTAACAATGCCGATAGTCAAAATGATATATCTCGCGAGGAGAACAAATGACGAAGTGT  
CCTCGACATCTTCCGAAAAGTATGAACGCGACGTGACGATCCTGAATCACTGTTTCGAT  
GATATTGAAAAATTTATCGCACGTCTGCAATACGCGGCGGCCGCCTCTAAAGAATTGGA  
ACGTGGAAGGCGCAATCGAAAGTCGAAGAAAAGAAATCTCGGCGACGGGATGCTGAC  
AATGAGAGCCAAACCGCCAGAGATGGAATTCATCGATATCTTTCAAAAATTTAAGC  
TGTCGTTCAATTTGCTGGCTAAGCTGAAGGCTCACATTCACGACCCCAACGCCCCCTGA  
ACTAGTGCATTTTCTCTTCACGCCGCTTGCTTTGATCGTGGACGCATCCACGATACTAA  
TTATGATCCTAACTTGCCGAGCAAAGTTGTCTCGCCGTTGTTGACTAGAGAAGCGGTAA  
ATTTGTTGATTAACGTGCGTCACAAAGTAAAGAGACGGAGCTCTGGCATTCAATTGGGCGA  
CACGTGGTTAATACCACGCGATCAATGGAAAGGTCACGTTCCCCCTATCACCTATCT

TCATGGATGGTTGGTCCCCGAGTATCCAATACCAGAAGACAGGGACCACGATCATCTT  
GCTTCGTTATTGAACGCTGACAAGCAGAAGAGGGACGAGCTCCCTGAACAACAGAAC  
GATTCGTACTATAATCATCGAGAAGTTGACGAATCTCATTACAGCAGCGATTATTTGGAG  
TACGAGAGCAGAGAAGAGCGTGCCGGCAACGAATATTTTGATAGAAATTACGGCACCG  
GTTCAGAGTTGTACGGCAGAGAAGAAAGAGTGGTCGATCAAACGAGAGCGCATAGCG  
ACATATCCGTTGATTCCATCGAAAGAACGCCGAGAACTGCCGGTATGGAAGGGCCCA  
GGAAGCTTGGTTGGACGATTTAGTTGCTAGACACGCGAAAATCGTACAAGTTACTTATC  
CGAGGACGGCAAACAACGATAAAGAATTGACAGTTGTTAGAGGTGAATACCTAGAGAT  
TCTCGATGATAGCAGGAAATGGTGGAAGGCAAGAAATTCAGAGGCCAGGTTGCGCAT  
GTGCCACACACCATTGTCACACCTCACAATCCTTCCCATTCTAACGACAACGATGTTTT  
CAACAATCCTTTGTACACGAGTCGATATCCGAGGCAGGGGCACAGCTATAATTACGAGG  
ATTCTGAAATCGAAAGGACCAGCACAAGTCCAGGACCTGAAGCCACTCATCGAACGC  
ATGCGATTCCACCTCCCGCACCTGCAGATTGGGTGAGAAAAGAAAGACTTGGGAAAA  
AAG

>novel\_circ\_000315

AATGGTGAGGATGCCGGGAGACTGAGCGAGGAACAGCGGTGAAGCGGATAAGATCGA  
AAAGAGTTGGTGAGAAATGGCTTTGACCGTCGTACCCTCGGCCCCGCTTTTCAATGG  
AAACGTGGGGACGCAGGCCTACGTTTCCGGTTCAACAGGGTCGAAGTGCCTTTGCTGC  
CCTTACGGATACCACATCGATCTGGACTTCGTGCGTTACTGCGAGGCGGTTCGCAGCGG  
GAAGCGCCGGGGACAGGTCGAGCATAGAGAGGCGCAAGAAAAGGGAACGTCGAAGG  
CAATGCCAGTCGATGGAGGTTCTTCTCGGTCTGGTGAGTCCAGCCCTGGTTGGAATAG  
AGGCCGAAGTCCCGAAAATACCGCAGGAAGCTGGGACGAATGGCGCGACGTCGTCT  
CTTTGACGAGCCACGATAGGCGAGGAGGATGCACGCAGGAATCGCCGGCCCTCGATCT  
CAGCGACGTCGTGGGCGACTTCGAGGCGACCCTGAAGCGATCCACCAGGCCGAGCAA  
AACTTGCGATAAGCAGGAACGCACGGAGAACG

>novel\_circ\_000316

ATGGAACGAACACGGCAACACCGGTGCAAAACAATGGGCAGAGCGAGCACGCGGCT  
GGTGATTTTGACAACCGGAGTGTCTGGAAGCGGAAACTCGAATCTCAGCACTGGCGCG  
CTACAGAACATCAGAGAGCAAATGGCCGCGTCGTTGGAGCGGATGAGGGAGCTGGAG  
GAACAGGTCAAGGCAATTCCCATGTTGCAGGTGCAAGTGTCGGTGCTGAAAGAGGAG  
AAGCGTAATCTGTCTGCGGCAAGTGACGAGCTGAGCAAGGCGAGCGAATGGAACGAG  
AGCGGGTTGCACAGGTACCGTAGCCAGTCGTTCTCGGAACAGCGTGGCTCCAGCGA  
AATCTGAGGAACGCGGCTACGACGCCGACGCGGGACATGGGAACGATGTGCGGCGCG  
ATGACACGGGACGTCGGTGTTTCGCACCAGCAG

>novel\_circ\_000317

AGATTGGTAGCCGAGCTGAACAGAGAACAGGAGGCTTTCATTGCGAACAAGCACACC  
GAAAAGGGTGAGGCTGTCGCACCGTGGGTGCGCCTAACGAGGACATACTCCGC  
GAGGAATGCTTATCTCTCTCCATGGATCAACGCAATTTCTTAAATCGCCGCCAAAGGA  
AGTCGATTTCCCATGGGACTTCGAGGCCGTACAACCGATGGCGCAAGCCACTCTCGCC  
TTGGATCCGAATTTGGAGAACATGAGGTTCCAAGTGGTGCCGAAAGTAATATCAGAGG  
AGAATTTCTGGCGGAACACTACTTTTACCGGGTGTCGGTACTCCGCCAGAGCCACGAGCT

GAACACAATGGCCAACCAGGCAGAGAACAACCTAAATCAAACATCCGCAGGAACTGT  
GGATCAAGCTGAAG

>novel\_circ\_000318

AGATTGGTAGCCGAGCTGAACAGAGAACAGGAGGCTTTCATTGCGAACAAGCACACC  
GAAAAGGGTGAGGCTGTCGCACCGTGGGTTCGGTGCGCCTAACGAGGACATACTCCGC  
GAGGAATGCTTATCTCTCTCCATGGATCAACGCAATTTCTTAAAATCGCCGCCAAAGGA  
AGTCGATTTCCTATGGGACTTCGAGGCGGTACAACCGATGGCGCAAGCCACTCTCGCC  
TTGGATCCGAATTTGGAGAACATGAGGTTCCAACCTGGTGCCGAAAGTAATATCAGAGG  
AGAATTTCTGGCGGAACCTACTTTTACCGGGTGTTCGGTACTCCGCCAGAGCCACGAGCT  
GAACACAATGGCCAACCAGGCAGAGAACAACCTAAATCAAACATCCGCAGGAACTGT  
GGATCAAGCTGAAGTTCAAGTGACCACTGGCCAGGAAAGCAGCGGAACCGTGATGAC  
CGGGAGTAACAGCGCGTTGGCCGATTTCGCCGGGCCACGAATTCGTGTCCGATAGCATG  
AGGGTCTCGGACACGGACCTCGAAGAGGTCCGGGAAGGCATGAAAAAGCTGGGGAT  
GCAGCCGCCTAAAG

>novel\_circ\_000319

GATCAACGCAATTTCTTAAAATCGCCGCCAAAGGAAGTCGATTTCCTATGGGACTTCG  
AGGCCGTACAACCGATGGCGCAAGCCACTCTCGCCTTGGATCCGAATTTGGAGAACAT  
GAGGTTCCAACCTGGTGCCGAAAGTAATATCAGAGGAGAATTTCTGGCGGAACCTACTTT  
TACCGGGTGTTCGGTACTCCGCCAGAGCCACGAGCTGAACACAATGGCCAACCAGGCA  
GAGAACAACCTAAATCAAACATCCGCAGGAACTGTGGATCAAGCTGAAG

>novel\_circ\_000320

GATCAACGCAATTTCTTAAAATCGCCGCCAAAGGAAGTCGATTTCCTATGGGACTTCG  
AGGCCGTACAACCGATGGCGCAAGCCACTCTCGCCTTGGATCCGAATTTGGAGAACAT  
GAGGTTCCAACCTGGTGCCGAAAGTAATATCAGAGGAGAATTTCTGGCGGAACCTACTTT  
TACCGGGTGTTCGGTACTCCGCCAGAGCCACGAGCTGAACACAATGGCCAACCAGGCA  
GAGAACAACCTAAATCAAACATCCGCAGGAACTGTGGATCAAGCTGAAGTTCAAGTG  
ACCACTGGCCAGGAAAGCAGCGGAACCGTGATGACCGGGAGTAACAGCGCGTTGGCC  
GATTTCGCCGGGCCACGAATTCGTGTCCGATAGCATGAGGGTCTCGGACACGGACCTCG  
AAGAGGTCCGGGAAGGCATGAAAAAGCTGGGGATGCAGCCGCCTAAAG

>novel\_circ\_000321

GTGACAACGCGTCGTTCAAATAACACGAGGCTCGACGGGTGTATATCGGTCGCGAGAT  
GCAGGTAGTCGCGCATTGTTTGTATGTACACACAGTGAGGGTCCACGCCTTTCCGCGA  
CCATTGACTCATCAAGGCGAAAGGCATCGAAGGGATTTCAGCGAAATATCAGGCAGGCC  
CCAGATACACCGCGGGTCCTAACCCAAGGGACCTAACCCGAGGGGCCGACCGACCCTC  
CCCCGACCGATCAACTCCCTCGCCGAGTTGACTCGAACGCGGTGTGTGACGGACCTAC  
AGCACCAACAACAGGAAACGAACCCGGATGACTCACCGTCTCGCTCCGAGGAAACGA  
AGCTACGAAGCATCGTGACAGAACTGGAACGCAACCAACTCTTACCGCGGTTACGC  
GCATCGCATAATCTCGTTACCGTCTTCTCCTCAGCCGGTCACGCAATCGTCCACGAAAT  
TCACGTGCCTTTTCGTGGCATCACGTGTGCAATCCGTCCGTGCAATCCTTGACAAATGG  
TATCAAAAGTGAGACAGGAAGTTTCGATTCTTGATTGAGAGTTGATTAACCCCTTTTCGG

TTAAAAATTCGATTGGCTATCCGTCGTATTTGAAAATTTTTTCGGGTATAAGTAATGAATT  
ATTATATCGAATTATCAGTAAAGTTTCTCGTTTTCTCGGGTACAACGATCGAGCAAAAAT  
GCATCCTCCAAGTTCCTTAACCTCGCGTTTCGATTATGGGGCGATTATGTGTCTGTTGTT  
CTTCGCGGAAACAGGCGTCAGTTTCTGGTCGAGAAAATTCTCTCCGAAGAGGAGGAG  
TGCTTCGACCCCCACGGGAAGGAGTTTCGTTTTTGTAAACAAGCCCGCGTGCGTTTCG  
GCCGAAGGGGGCCGGAAGCGAGCGAATAATTCGCAATAAGGTGTTTCTAATCGCCTC  
GCAATCTCGCGTATCCTCCTCGGCATTTTCGTGCACGTGGAATCGTAATTAAGAGGAGA  
GGAGAGGAAGTGCCCGGTCAGGAAACGAGAGGACGATTTTTCACGGCCCTCTCTCAT  
TGTTTGTTGGCGATAAAACCGATTATTCTCGCGATCTTTTTTCGCGGAGGAGGGAAACG  
AAGGGAAGACGAAGCGGCACAGGCCGACAATTCGCTTAAATGGAACCAAGAACACCA  
TTTACTCGTTTATCGAGCGTTTCGCCGTGCACAACTCGTGCGATCTATTGTATTACCCGAC  
CGATGAGAAAATTCATCGTGTTATGGTGCCGTTGCGTGCCACGCCGGCCTCAATCCTT  
TTAATGGCCATCCCCTATCATTTAAATCCCTCACCGGGAATGGTTTATGGTTTATAAATGA  
AGATTGTCTTCGCCTCCAACCTCGTTTTCTAATATTCTCGCAGAAGTGAGAAGACCGAT  
CGATTCAATTTCAATCTCTAATAATTCAGGGAATTTTAAATTTTACAATTCCATAAGAAA  
CAAAGCAATCAATATTTAACGTTACGAGGAATCGTTTTTCATTTTGCAAAAATGATTACG  
ACGCGAAAGAAAACAAAAAATAAATAAATTTTCCAGAATCGAAGGGGGCTAGAT  
CTTCGACGATCTTCGTGCGATTACGTGAAAGAAAGTCGCGAGAGTAGAAAGATCCATA  
AATCGCTGCGACAGCGGCGCGACTCGCAGGCCGGACAGGCATAGAGAGCCAGACAGT  
CGCCAGGCAGACGGACACCAGACGGAGACG

>novel\_circ\_000322

ATCGGTTGCCACGACGAAGCGGTGACGACCGACAACCTGGTGGTCCTGGTGGACTCTG  
ATCTGTCCCGATTGCCGCTGCCCGATCTTGTCTGTCCGCCGTGGAACAACCTCCGCCT  
CCGACGCCCCAGGTGACGGTGTCCGCGCCCAGCAGCCCGACCAGGGACGCGGCATTC  
CAGTTTCCGGAGTGACGCGGGGACGAGAACGGTGCGGCACCGGTGCCGAGCCCCGAG  
GCCACGGCCGCGAAGACGCAGGCTCGCCTCGGAGGGTGGTGGCGCTACTATGAAGAA  
AGGGCCCGCCACAGAGCGAATCTGCAAGAAATGCTGCGGCCACTTGGGACAGGCCTT  
CAACGAGAGCCAGTGGGCGAGCGTAGGCGCCAACCTCAGGAACATCGCCGACGACTT  
TCATGCGTCACAGACCAAG

>novel\_circ\_000323

GCCGCCGAGATCGAAAAGTCCCGACTGCCCGCGATGGACCCGAGCTTCGCAGATTCCA  
ACAACACGAGCGGCTCAACCGACAGTATCCTGTGCTGCTGATCCCGGCCCCCCTCCG  
CGAGACTCTGTGGACGACAGTGGCCTTGTACCTCGGATGGAGGCTGGTCTCCCGTCTT  
CGATAGACGCGACGGAATCGTCGTTGCGTCGACGCCACGACGATCGACCACGATGCCT  
CGAGAACGTTAAGAATCATCATCACCGACGCTTGGAACCGACCCAACAGGGACAGCC  
AGTTAGCCAGCGAGCCGTCACCTGGTAAACCAGCGACTGGTCCTCCTCCTTGGCCCTT  
TGCACGCCGCACGAACCGACGGACGCCGCGCCCGTCCGTTTCCAACGTTTGAACCA  
GCACACGGAATCCTTCTTGCTGGACGACTCCTGCAGCAACGTCGAACGCGATCCTCTG  
TTCTCGCGCCAACATCTGTTCTCCGTGCACGCGCTCCCTCGCCGCGCGCGATCGAGA  
ATGCGCTCGCATCGCGCACCCCTTCGCTCCTTCGACGCGGATCCGTGCGCCTCGAGGA  
CGAGGACGAGGATTCGAGGGAGGAGGAAGAGGAGGAACCTCGTGGGACGCGACGAAT  
ACGAAG



>novel\_circ\_000324

GAATAACAATTATCGAAATTCGACAACCAGATCCTGTCTTCAAATCGTCTCCCTGTCTGA  
TTGGCAATTTTTACACGATTCCAATCCTCGGAGAGACGGGCGGGACAACGCGAGTCT  
GCACACAAAGGCGCATCCTCGCGGGGAAATTTATCGCGACAGGACGACGACGACGAC  
GACGTCGTTCGACGGCGGTGAAAAGCGGCCGAAGAAAGAGGATAGAAACGAGAGGGG  
GAAGGGAGGGAGGGAGCGCACGAAGGATCCGGCAATCTCGTGAATAGCCCCGCGCCT  
TCCACAATCGTCGGAATCAATTCCCAGATTGATTTTTCGCGCCGGGTACCGATTCTCG  
GCTTTCCCGATCGAAAGACTCTCGCGCCGAAGATTTCTTCTTCTCCACGGAATATTT  
CCCGCTTGCCGAACAAAAAATGGACCGACAGGAATGCAATATGCGACGGATG

>novel\_circ\_000325

ACACGAAGCCAGAGACATCGTCCGACACGCGGTGGGAGCTGGAGAGCAGGATGCGGT  
TCTTTTCACGGGTCAAGGCACGGCGGCTGCCCTCCGCGCGCTTCTGCGACACCTCGAC  
CTCTCCAAATCAACTGTGGTCTTCGTTGGACCGTTCGAGCATCACGCGAATCTCCGCCC  
TTGGCGGGAGCATGGAGTCAGGATAATACGAGTGTTCGGAGACCCGGGAGGGCTTCTTA  
GACTTGAACGATCTCGATCGAAGCTTGATCAAGATGCGATCCGAGGGTGTTACGCAAA  
TGATCGGATGCTTCAGCGCTGCCAGTTGCATAACCGGGGTTTTGGCAGATGACGTCGC  
CACGACCCTCCTCCTCCATCAGTATGGGGCGCTCAGTATCTGGGATTACACCACAGCAG

>novel\_circ\_000326

ACACGAAGCCAGAGACATCGTCCGACACGCGGTGGGAGCTGGAGAGCAGGATGCGGT  
TCTTTTCACGGGTCAAGGCACGGCGGCTGCCCTCCGCGCGCTTCTGCGACACCTCGAC  
CTCTCCAAATCAACTGTGGTCTTCGTTGGACCGTTCGAGCATCACGCGAATCTCCGCCC  
TTGGCGGGAGCATGGAGTCAGGATAATACGAGTGTTCGGAGACCCGGGAGGGCTTCTTA  
GACTTGAACGATCTCGATCGAAGCTTGATCAAGATGCGATCCGAGGGTGTTACGCAAA  
TGATCGGATGCTTCAGCGCTGCCAGTTGCATAACCGGGGTTTTGGCAGATGACGTCGC  
CACGACCCTCCTCCTCCATCAGTATGGGGCGCTCAGTATCTGGGATTACACCACAGCAG  
CCCCGTACGTGCAGATCGACATGAACCCACATCTGCCCCGGCGTCGGTGAGACGACCGT  
GCACAAAGACGCGATTATTTTCGCCGGGCACAAGTTCATCGGCGGCGTACAGTCGCCC  
GGAGTGCTCGTGACCAAACGATCCCTTCTCAAAGATAAAATTGCCACGGAGGACATGA  
GGGACTCGCATCACTACCACCGGGACGCGGAAGTGC GCGAGGAGAGCGGGACCGCGG  
GTGTCGTGGAGGCCATCAGATGCGGACTCGCGGTTCAATTGAAGGAGAACGTGACGC  
CTCGGGCGATCGTCGCTCGTCAAGATAAGATATCGAG

>novel\_circ\_000327

ATAATACGAGTGTTCGGAGACCCGGGAGGGCTTCTTAGACTTGAACGATCTCGATCGAA  
GCTTGATCAAGATGCGATCCGAGGGTGTTACGCAAATGATCGGATGCTTCAGCGCTGCC  
AGTTGCATAACCGGGGTTTTGGCAGATGACGTCGCCACGACCCTCCTCCTCCATCAGTA  
TGGGGCGCTCAGTATCTGGGATTACACCACAGCAGCCCCGTACGTGCAGATCGACATG  
AACCCACATCTGCCCCGGCGTCGGTGAGACGACCGTGCACAAAGACGCGATTATTTTCG  
CCGGGCACAAGTTCATCGGCGGCGTACAGTCGCCCGGAGTGCTCGTGACCAAACGATC  
CCTTCTCAAAGATAAAATTGCCACGGAGGACATGAGGGACTCGCATCACTACCACCGG  
GACGCGGAAGTGC GCGAGGAGAGCGGGACCGCGGGTGTCGTGGAGGCCATCAGATGC

GGACTCGCGGTTCAATTGAAGGAGAACGTGACGCCTCGGGCGATCGTCGCTCGTCAA  
GATAAGATATCGAG

>novel\_circ\_000329

ACGGCGCTCCAGCCGAAATCACGATGACGATGGACGTGAGCAAGTCGGAGCCGAGTA  
AAAATGGCGCGACGCAGCACGAGTGCGCTGGTTGTGGGAAACCGATCACGGAAAGGT  
ATCTCCTCAAGGCCATGGACCTGTTCTGGCACGAGGACTGTCTGAAGTGCGGGTGCTG  
CGACTGTAGGTTAGGAGAGGTCGGTTCTAGTCTGTTACCAGGGCCAACCTTATCCTCT  
GTAAGAGGGACTACCTCAGGCTGTTTCGGGAATCCGGGACATTGCGCGGCTTGCAACAA  
GCAGATACCGCCGTTTCGAGATGGTTATGAAGGCCAGGACGAACGTCTATCACCTGGAT  
TGTTTCGCCTGCCAACAGTGCACTCATCG

>novel\_circ\_000330

CTGGTGTAGTGGTGTACGTGACGGAGGGAATCTGGAGAATCGTTCTCGGCACAAGGC  
ATCCGTGGAAACTGGCTCGAGCTTCGAACTCTGTTAGACGGCGCTCCAGCCGAAATCA  
CGATGACGATGGACGTGAGCAAGTCGGAGCCGAGTAAAAATGGCGCGACGCAGCACG  
AGTGCGCTGGTTGTGGGAAACCGATCACGGAAAGGTATCTCCTCAAGGCCATGGACCT  
GTTCTGGCACGAGGACTGTCTGAAGTGCGGGTGCTGCGACTGTAGGTTAGGAGAGGT  
CGTTTCTAGTCTGTTACCAGGGCCAACCTTATCCTCTGTAAGAGGGACTACCTCAGGC  
TGTTTCGGGAATCCGGGACATTGCGCGGCTTGCAACAAGCAGATACCGCCGTTTCGAGAT  
GGTTATGAAGGCCAGGACGAACGTCTATCACCTGGATTGTTTCGCCTGCCAACAGTGCA  
CTCATCG

>novel\_circ\_000331

AAGCAAGTTGTCCAGCGGCTGCGCAAAGAGGTCGAAACATTTAAAGCGGAGAATGCA  
AACGGGGGCAAAAGTTTCCATCGCATCGCTTCTTGGCTTGAATAACAATAATCATATTAC  
AAATAACAATGAAAGTAAACTTAAAACCGGCAATGATTTTTCTACGAAGAATTCGAAA  
GAGGACTACGAAGAGATTGTTAGAAATGGAGATGTTCCCTCACCCACCCGCAATCTCG  
CACCTACCAAGGAACGATCCAGTTCAGTGGAGACGATTTCCGGTGAGGATGACGTTAT  
TGAGGTTTCCATGGATGAAAATTCCAATGAAAAATCCGAAAAAGAAGAATCAGAGGAA  
TGTAATAAGAGTCGACTGAAAACTTAATTTCTTAAATGCTCTTGGTCTTATTACTACT  
ACAACATGTGCCGAATTACAAAACAAAAGAGCCGAAAGAAAACGTCGTAGCACTGCA  
AATCCACAATTTGTTTATTCCAATCTTGAAGTGCCAACGAAACGAAAACGCACTCGT  
ACCTGCAATCTGGAAATGTTCCGCAAACTCGTCAAACAACCGCGCGTATGAATGGTCC  
ATCGCCACCTCCTGTAAAAGTTGTGCCACCAAAATCCATATCACCGCCAACGACTAGG  
ACTGTGATGAAATCTTTAATTCCGGTGCAAAAGTCCACCACGCGACCGAATATACTTAG  
AAATGTTACGGAAAGTAAAGTTTTTCCTAATAAAAACAAGATTGAAAACGGACCCACA  
CAAATTCAGTTACCTGTATCTACTGTAAAGTCCGTTCAATCGATTGGCAACAAAGCAGT  
TCACATAACCAGGTTTACCTTCCAGTCTGACTATCGAGAGGATCAGCAGTGATTCAGCAG  
TCTGCATAAGTTGTAGAAATCCAGGTACATTGACAGTGTGTGAAAATTGTGCATCAAAT  
TACCACGTATCTTGCCATTCTGTATCTCCGGCGCCACCAAGAATATGTCCAAAATGTGC  
GTTAATAGAAGAAGAAGAAATTGATGACGGGGACGAAGGAGAGGAAGAAGGACGTC  
CATCGTTTAAAAAAGATGAGGAATTCG

>novel\_circ\_000332

ATCAAGGCTGACCGAGATAGGTAGGTCCGACGTGAAAGTATCTCAAGTCGATCCCGGA  
CTTTGCCAATTTTCGTAGAGGATACTACAAGATCGTCCGCCAACACCGAACCCGATATGG  
TCGTTTCTCCGGTCTCGTCTGACTGAACCGGCGCTGTACAACGTGACTGATATAAAATTA  
AACGACTGCGCGGATCACAATGAGCATCTAGCAAACAACTTAATAACAGGGGAGTTA  
AGGATCACGCGTTACCATACAGCGAGACAATATGTCGAACGGAAAGGATAATTATGC  
CTTAGATTTTCGACTGCATAGAGAAGGCGATCGATAACAAATTAAATTCATCCGCCGACA  
TCAAAGCGGAGCCCGATATCGTGAAGAAAGTGGCAG

>novel\_circ\_000333

GAGGAAGCTGAATCGACGTAACGGTCTACGCCAGGATGGCCAGTTGGCCGCTGAGAA  
TCGTGCTTCTGTCCAGCACCCCTCATCCTTGTCCGCGGTAAGTAAGAACACAAATCCTGC  
CGTTTCGTCCGTGGCGTTCGTTGGAAAATCATGGCCGCGCCCGACCGTTTCGGTTTCG  
TCTCGTCTGTTTTCGACCGTCGGCCATTTTCATCGGTCCACGGCTGGGCAATACCGGCTG  
GGGGATATGCCTGTTTCAGGAGGAGGAGGAGGAGGGCGAGGGAAAGGGAAGTGCGT  
TTAGTCGAGTAAATATTTGCGTCGCTGAGCAACGCGAAGCGAGAAAATGAGAGGGACC  
CACCGACGAAAAGTATTTGACCAATAAAGTGACTTCCTCCAGGGAGAAATGATTTCTT  
CGTTTTGCTCTTTTTTTAAGGGACGAATTTGATTTCCGCCTCGGAGTATAAATGCCATAA  
AATCCCTTCTCTTTTACCTCCGGTAATACGTATATACGTATATACGTGCGTATATACGCGTA  
TAATATACGTGGAGGCGTTACGGAGTAAATGTTTCTCCCTCGTTTCGTTATTCTCTTTTAT  
TTCTTCTTTTCTCTCTCTCTCTTTTTTTTTTTTTCTTGAGAAAAGTGGTAAAAAGTGTA  
TGCGATATTGAAAACTTTTAATATCGCATAGTTACCTCGTCCCGGTTTACAGGGACGGTA  
TTTGCCTCGTTTTTCGAACCTATCTCTCTCTCTCTTTCTCTCTTTCTCGACGAGCAGGGAC  
GAGCCCAAGTGTCGGTGATTGATTTTCTGTCACTCGACGATCCGTTTCATCCGTTGCTC  
AATCACGTGACGAAAACACTACGGGTGTCCATTAAATTATGAACGTCCGTTTTATTAT  
TTCGAAATCTATTATGTTACTCAACTTCTCGTGTAATTTGTAAGCCAATACAAGAGAGGA  
GTAAGTAACTTCGTACTCGGATATCCGTTTTCTTCCAACCTCCATCATTAACTTTCT  
CTTCCCTCGAAATGACGGAGGCGAGTCGTTTCGAGTCGTACGGTAATCGATTAATACTC  
TTTGGGGAAAAAGGGAAAAAAGAAAAAGAATTCGAGGTAGCGATAATAATCAGATTT  
AAACGGACGCGTCTCTGGCAAATAAAAGTTTGTACGAGAAATTGGTACCGTTACGTTA  
TTTAAATGCTGTCGTATCGACGATGGAACTTTTGTGCTCGAATTCTCAAAGTAATTC  
GTTTCGCGGCGATCGAACCACGCTGTGATGTCTTTTTTCATCCGCTGGCCAACTTTTTATT  
TATCGCAATTCCATAAACGTCCCCGGGGATATTAAATCGTCGATAAATTCATTGTATTCG  
TCCAATGACAATCTCTCGAACTTTGCTGAACAAGATATCCGTTCTGCGAACGATACT  
TGTTGCCGATTGAATTTTCACTTTCGACCTTTCCTTATCTTTTTCTTACTCTTTTACACCC  
CTTTATTTTTTCGTTTTAATCCCTCTCCTCTCGACTTCCCTTTCGCATTTCTTCTTTTTCC  
TTTTTCTTCTTCTTCTTCTTCTTCTTTTTTTTTCTTTTACTCTTCGGTTATTATCGTCGAGT  
TTTCTCAAGAAGTATTAAAGTAATGCCACGCTCTTTCGCGTAATTAAATGCCGTACTCG  
GTGAACTGAAACAATATAAACTTTTCGAGCGTCAAGTTTACGAGCGTTGAAAACTTGC  
TCCGATATTGAATATCATTGCGAATGTGTTTCAACGTTGCCTTCTTTTCTCTCCTCCTCC  
TCTCCTTCCCCTTCGACGCTCGTAAAACTTTTTAATCGACAGTGACTCGCGAGTACA  
CCGTTCTCTTCTTTTTCTTCTCGTCTCTTTTTTCCCGCCCGTCTTCGCCGGGAAAACGAA  
GAAGGGGGAAAGTGAGACGCTTGCCACGCTTATCGCTTCCCCTCTATTGGACCTCTATC  
GAGGCAGAAACGCTCCTCTCTCTCTTTTTTTTTCTCGAGAAATCGGTGTCGGAGTGAACA

TCGAATTCGTGTTATCCGAGCCGCGAACTTCGTCTTTCAGCAGCGCGAGGGAGGAGGA  
TCGGTCGTCCCCGCCAACTTTCTCTCACCCCTTCTCACCCCTCGAAAGAGAGAAAGAGA  
GAGAGAGGAGGAGGTGGAGGAAGGGAAAGGAGGAGATATACAAGCGGCGCGCGCGC  
CCTCTCCGTTCCAACCATAGCTCGTTCGGAATGCAGAGTACGTGCACGGGCTGCGGTT  
GCCGGTCGGTTTCCGGTCGTAAGCTATCCGCGAAGGGGAAAATAGCGGGGAAAAGAG  
CGTGAGTGATTGGAAGGTAGTTGCGGCCTCGTCCAGGGGAGAATGGGGGGAGTAG  
AGAGAGAGAGAGAGAGAGAGGGGAAAAGAATGGAGCGAGAGGGAGAAAGGAAAGGAGA  
CGGAAAGGAGGAAGGAAGAAAGCGGGGTGGGTGGCGGGGTGTTAGCGGCGGTGGTT  
TAAACGAGGGAGGAGGGGCGGATGCTTTCTTAAAGATGTGGAGTCGGGGCGCACTTG  
TTGCGCGGAAAAGGAGTACGCGGGCGATGCCAAGAAAAGAAGGAAGGAAAGAGGGGA  
AGGAAAGATAAAGGAAGGAAGGAAGGAAGGAAGGAAGGAAGGAAGGAAGAGGCGTGTGC  
AGCCTCGGAAGCGTGCAAAAAGGCGTGGAGAGGGGGAAGTGAAGAAAAACGACGGC  
GAGGGTAGGGTGGGGGAGATTTGACGGCGACGAAGTGAGAGTTTGAGGGGTGTAGGC  
GAGGAAATGATAGGGGTTTGAGAGGGAGGGGGCGAAGATACGGCTGGGGAATCGAAT  
TGATTCTCTTTTACGGGCTCGCGTTACTTTTCTTCACCGCCTTTTGCCATCCTTGCCTCT  
TGACCGTGGCGCTGCTCCTCTTCCAATCTTTCCTCTTCTCTCTTCTCTCTCTCTCTC  
TCTCTCCCGCTCTTTCAATTTCTCTCAAGCCTTTCTCTCTCGCCGGTGTTATTTATTTATC  
AGCTCTCGCACGTAGCTTTCTCAAGCTCGTGTAAGGAGCAGACGAGGCACCACTTC  
GACCGGACGGACCACCTTCTTTATCCGGACCATCTCTCTTTCTTTCTTTTCGTTCCGACC  
ACGGTCTTGGCCTTTTTCTCGCCTCTCGTTCGGATCCTCCCCTCCCGTTGTACCACAC  
GCTCTCTCATTTCAATTTGCCGGTCGTTGGACGGTGAAAGGTAGTTCTTTTCGCGTCGAGG  
GGGGCAAGAATCGGCACTCGCCAATTGTGACGGGAGGATGAGAAGACTTATTGGGATT  
CCTTGCGGACAACGGACGACCTTCCACGATCGATCGATGGACGCGCGACCAATCACGA  
CGATCCATTGGTCACGGTGAATATCGTATATCGGAGGAAAGTAATAGCCTCGAGGATGA  
TCGATAAGGAGTGGACAATTCTTCCTTTGCTTCCTACCATATATATATATATACGGAAG  
AAACTGTGAACGCGTCGTCATAGAGAGAGAAAGAGAGAGAGAGAAAAAAGAAATTCA  
CCGAGCAATAATTTATTAATTCAAGATGGATTAAAGCGATGGAGAAGGGCGATGAGAG  
AGATGGAGAGAGACAGAGAGAAGAATAGTGCTTTTAAGTTTATTAACCGTGAAACAAA  
AGACGAAGCGTGAACAGGTATAGCCAGGTCCAAGGTGGTGTGTAGAAGTCTATTGAAC  
TTCCGGGCTTGAGAGAATTCACCACGTTACTTATTTATCAGCATCTACACGTAGCGCGGT  
ACGGAGTATCACCTCATGGGAAAAAGGCACCTTCCGCGCGAGTAGATAGAATCAACCG  
GCCCCGATTGGATTGGAGCCTCGAGGAAAAACTTATTTGGATTCTTACGGATATAAGG  
GGTTTCCGGGGCTGCTTTTACTCGGCCAGCTTGGACGCGAATTGATCGATATATCGAAG  
GGAGAGGAGAGTGGTGGCGGCGGCGTTACATTGACCGTACAGAAATCGAAATTACGC  
GTATAATTTGTTGCTAGTTTTTCTCCAAAGGCTCGCCCTTTAATCGGGAAGATTAAAAG  
GGTAAAAAGGGCGCGCGCGCGCTTTCCCGAGTTATTCAACTTTTCCCGAGAACTT  
GATTCTCCGAGGTATGGTCGATGCGCGTCGTTGAATAACGAGCGTTAAGTAACAACATA  
GAATGCCAGTAGTTGCGAGCTATCTGTATTTTTTTTTCCCTCCTCTCCTTTTTCTCTCCTC  
GTAACGAGGAGAGAAAAACGAAGGTGAAACATTTCTCTCTTCGTGTCTCGAGCGTGT  
TTCGCAAAGAAAATTCTTTCAGCAAGCCAACCTATGCTTTACGGCTCTTAAACTTTATC  
TCTTTCTCTCTTTCTCTCTACGATATCGATATTTCTCCGTGGAAACACACGCGACGCG  
AATATCGACGGGATATTGACTTTTTCTTTTCCCAACTCGTTGGAAAAAGAAGCTTAACC  
TATTCTCTCTCGATTGATGACTCTTGTTGCATCCTTGGCCAATAAATAAATACTGTATC  
TTGGAATAACTATACTTTTCCAGGCGGTCCATCGTAAATAACGTTTGATCGAGAATTGG

GGAAGACTTGGCCACGAGAGAGAAATTCGATGTAGCGACACCGATGTATCGATTCCAA  
AATTATCGCACAAACGTCATCGTAGCAGTAGGCGAGGTTATTAGATTGGCCCGACAGAG  
AGGAGAATAAGACAGGCGAACTCAAGATATTGTATTC

>novel\_circ\_000334

GAGGAAGCTGAATCGACGTAACGGTCTACGCCAGGATGGCCAGTTGGCCGCTGAGAA  
TCGTGCTTCTGTCCAGCACCCCTCATCCTTGTCCGCGGGCGGGGAGTGGTGCTGGACAG  
TCAGGGGCCTGTGTTGATCTCGGAGCCACGCTCCTCGGTTGAATTCTCGAACGAGACC  
GGGGCCATGATCCATTGCTCGGCCAGGGCAGCCCGTTGCCGAGGATTGATTGGCTCA  
TGGGGGACGAGTCGCCTGTCTCCCTATACCTCACATACGCGAGATGCTGGTCAACGG  
TTCCATGTACTTTTTGCCGTTTCGGAGCGGAGACCTACCGGCACGACGTCCACTCGGCC  
GTCTACAGATGTCAAGCCTCGAACAGCGTCGGTAGGGTATTGGGCCGTGAAATCACGG  
TAAAGGCCG

>novel\_circ\_000335

GAGGAAGCTGAATCGACGTAACGGTCTACGCCAGGATGGCCAGTTGGCCGCTGAGAA  
TCGTGCTTCTGTCCAGCACCCCTCATCCTTGTCCGCGGGCGGGGAGTGGTGCTGGACAG  
TCAGGGGCCTGTGTTGATCTCGGAGCCACGCTCCTCGGTTGAATTCTCGAACGAGACC  
GGGGCCATGATCCATTGCTCGGCCAGGGCAGCCCGTTGCCGAGGATTGATTGGCTCA  
TGGGGGACGAGTCGCCTGTCTCCCTATACCTCACATACGCGAGATGCTGGTCAACGG  
TTCCATGTACTTTTTGCCGTTTCGGAGCGGAGACCTACCGGCACGACGTCCACTCGGCC  
GTCTACAGATGTCAAGCCTCGAACAGCGTCGGTAGGGTATTGGGCCGTGAAATCACGG  
TAAAGGCCGTCGTGCGTCAAAAGTACGAGGTTCAAGTGCGAGACGCCTACGTCCTACC  
TGGAATACCGGTGTGCTCAGGTGCGAAATACCGACTTTCGTAAAGGAATACGTGGCA  
GTCACGTCCTGGGTTTCGAGATTCCGCCTACAACATCTTTCCAACGCCGAAAAGCG

>novel\_circ\_000336

GAGGAAGCTGAATCGACGTAACGGTCTACGCCAGGATGGCCAGTTGGCCGCTGAGAA  
TCGTGCTTCTGTCCAGCACCCCTCATCCTTGTCCGCGGGCGGGGAGTGGTGCTGGACAG  
TCAGGGGCCTGTGTTGATCTCGGAGCCACGCTCCTCGGTTGAATTCTCGAACGAGACC  
GGGGCCATGATCCATTGCTCGGCCAGGGCAGCCCGTTGCCGAGGATTGATTGGCTCA  
TGGGGGACGAGTCGCCTGTCTCCCTATACCTCACATACGCGAGATGCTGGTCAACGG  
TTCCATGTACTTTTTGCCGTTTCGGAGCGGAGACCTACCGGCACGACGTCCACTCGGCC  
GTCTACAGATGTCAAGCCTCGAACAGCGTCGGTAGGGTATTGGGCCGTGAAATCACGG  
TAAAGGCCGTCGTGCGTCAAAAGTACGAGGTTCAAGTGCGAGACGCCTACGTCCTACC  
TGGAATACCGGTGTGCTCAGGTGCGAAATACCGACTTTCGTAAAGGAATACGTGGCA  
GTCACGTCCTGGGTTTCGAGATTCCGCCTACAACATCTTTCCAACGCCGAAAAGCGATG  
ACAGACATCACATGCTGCCGACTGGGGAACCTCCTCGTGTTCTCGGTGACCTCCTCCGA  
CGCCAGTCCAGTTATCGTTGCAGGACCGTGCACCGCGTCACCGGCGACACCGTGGA  
AGTTCCTCGTACGCGAGGCTCGTGGTACCG

>novel\_circ\_000337

GAGGAAGCTGAATCGACGTAACGGTCTACGCCAGGATGGCCAGTTGGCCGCTGAGAA  
TCGTGCTTCTGTCCAGCACCCCTCATCCTTGTCCGCGGGCGGGGAGTGGTGCTGGACAG

TCAGGGGCCTGTGTTGATCTCGGAGCCACGCTCCTCGGTTGAATTCTCGAACGAGACC  
GGGGCCATGATCCATTGCTCGGCCAGGGCAGCCCGTTGCCGAGGATTGATTGGCTCA  
TGGGGGACGAGTCGCCTGTCTCCCTATACCTCACATACGCGAGATGCTGGTCAACGG  
TTCCATGTACTTTTTGCCGTTTCGGAGCGGAGACCTACCGGCACGACGTCCACTCGGCC  
GTCTACAGATGTCAAGCCTCGAACAGCGTCGGTAGGGTATTGGGCCGTGAAATCACGG  
TAAAGGCCGTCGTGCGTCAAAAGTACGAGGTTCAAGTGCGAGACGCCTACGTCCTACC  
TGGAATACCGGTGTGCTCAGGTGCGAAATACCGACTTTCGTTAAGGAATACGTGGCA  
GTCACGTCCTGGGTTTCGAGATTCCGCCTACAACATCTTTCCAACGCCGAAAAGCGATG  
ACAGACATCACATGCTGCCGACTGGGGAACCTCCTCGTGTTCTCGGTGACCTCCTCCGA  
CGCCAGTCCAGTTATCGTTGCAGGACCGTGCACCGCGTCACCGGCGACACCGTGGA  
AGTTCCTCGTACGCGAGGCTCGTGGTCAACGGCGGTTTACGTACGTATGTGACGAGCA  
ATTACGCGTCAATATTTAAATCGAAACGATATTAATGTTTACGGACGCGTTGAAATCGTA  
ACGATGTCCCGAACTCGCGGAGGACTCGATGAGTTTTAAATTTTCTTCCGGGATAAACG  
TATCCCGGATTAATAATAAAGATTCGTACGTGCGATTGTCACGGCGTGTAATTAACGCGA  
TAAAGTAATGGGGGAAAAATGTAGAATGTAAACGGAAGGGGAGAGCGGGAATAAATG  
TAAATTTGTGCGAGAGCGTAGCGGTTTCAATAATACGTAACAGCGACAAAAGGAAGGTC  
TTTCACGGTTGTGAAAAATTGATACCTTGAGATCTTTGCGACCCGTTTCAACGAAATCT  
CCGCGGAGATTTCTTTCCGAGATATTCGAAATGCATTTTCGAGGTATCAAGGGGGAAGA  
GGATCGTGAAAAATTTATGAAAGATGAAAAAGCAATTGAAATATAAGAACGGTAACC  
CTCATACGCCAGTTCGCGGAGATTCAACGAACGAGTGAGTCCAGCGCCTATAAGGAC  
GGGGGAGACGATCGTCCTTTCTGCATCTCGCAGGGGATCCCGCCACCCATGTATCTAT  
GGTTTCGCGAGTCCGTGACGGGACTGCGATGATCTTCAATTCGGAGAGGATCTACGC  
GAGAGCAGGGGTCTCGTGTTGCAGTCGGCGAGGGCGGAGGACGCGGGGCGATACGT  
GTGCCACGCCAACAATACGGCCGGTTCCGAGATGGTCGAATTGGAAGTCTCCATTATAA  
GCAGCCTCTCCATCCACCTGGTGCCTCAACAG

>novel\_circ\_000338

GAGGAAGCTGAATCGACGTAACGGTCTACGCCAGGATGGCCAGTTGGCCGCTGAGAA  
TCGTGCTTCTGTCCAGCACCCCTCATCCTTGTCCGCGGGCGGGGAGTGGTGCTGGACAG  
TCAGGGGCCTGTGTTGATCTCGGAGCCACGCTCCTCGGTTGAATTCTCGAACGAGACC  
GGGGCCATGATCCATTGCTCGGCCAGGGCAGCCCGTTGCCGAGGATTGATTGGCTCA  
TGGGGGACGAGTCGCCTGTCTCCCTATACCTCACATACGCGAGATGCTGGTCAACGG  
TTCCATGTACTTTTTGCCGTTTCGGAGCGGAGACCTACCGGCACGACGTCCACTCGGCC  
GTCTACAGATGTCAAGCCTCGAACAGCGTCGGTAGGGTATTGGGCCGTGAAATCACGG  
TAAAGGCCGTCGTGCGTCAAAAGTACGAGGTTCAAGTGCGAGACGCCTACGTCCTACC  
TGGAATACCGGTGTGCTCAGGTGCGAAATACCGACTTTCGTTAAGGAATACGTGGCA  
GTCACGTCCTGGGTTTCGAGATTCCGCCTACAACATCTTTCCAACGCCGAAAAGCGATG  
ACAGACATCACATGCTGCCGACTGGGGAACCTCCTCGTGTTCTCGGTGACCTCCTCCGA  
CGCCAGTCCAGTTATCGTTGCAGGACCGTGCACCGCGTCACCGGCGACACCGTGGA  
AGTTCCTCGTACGCGAGGCTCGTGGTCAACGGCGGTTTACGTACGTATGTGACGAGCA  
ATTACGCGTCAATATTTAAATCGAAACGATATTAATGTTTACGGACGCGTTGAAATCGTA  
ACGATGTCCCGAACTCGCGGAGGACTCGATGAGTTTTAAATTTTCTTCCGGGATAAACG  
TATCCCGGATTAATAATAAAGATTCGTACGTGCGATTGTCACGGCGTGTAATTAACGCGA  
TAAAGTAATGGGGGAAAAATGTAGAATGTAAACGGAAGGGGAGAGCGGGAATAAATG

TAAATTTGTCGAGAGCGTAGCGGTTTCAATAATACGTAACAGCGACAAAAGGAAGGTC  
TTTCACGGTTGTGAAAAATTGATACCTTGAGATCTTTGCGACCCGTTTCAACGAAATCT  
CCGCGGAGATTTCTTTCCGAGATATTGAAATGCATTTTCGAGGTATCAAGGGGGAAGA  
GGATCGTGAAAAAATTTATGAAAGATGAAAAAGCAATTGAAATATAAGAACGGTAACC  
CTCATACGCCAGTTCCGCCGAGATTCAACGAACGAGTGAGTCCAGCGCCTATAAGGAC  
GGGGGAGACGATCGTCCTTTCTGCATCTCGCAGGGGATCCCGCCACCCATGTATCTAT  
GGTTTCGCGAGTCCGTGACGGGGACTGCGATGATCTTCAATTTCGGAGAGGATCTACGC  
GAGAGCAGGGGTCTCGTGTTGCAGTCGGCGAGGGCGGAGGACGCGGGGCGATACGT  
GTGCCACGCCAACAATAACGGCCGGTTCCGAGATGGTCGAATTGGAAGTCTCCATTATAA  
GCAGCCTCTCCATCCACCTGGTGCCTCAACAGGTGACCGTCGACCTGGGCAAGGACG  
CGGAATTTCAATGCTCGGTCACCGGCCAGCCAATCCCCGTCATATTCTGGACCAAGGA  
CGGGCTTCCCGTGGGAGAGAGCGCCTCTGGTAGAAGCAAGATCACAGGCAACGACGG  
ATCCACGCTGCGCATTTCTCGGTGCTGAGGGACGACAAGGGGATGTACCAATGCTTC  
GCGAAGAACGACTACGAGATGGTCCAAGCGACCGCCGAGTTGCGTCTGGGGG

>novel\_circ\_000339

GAGGAAGCTGAATCGACGTAACGGTCTACGCCAGGATGGCCAGTTGGCCGCTGAGAA  
TCGTGCTTCTGTCCAGCACCTCATCCTTGTCGCGGGCGGGGAGTGGTGCTGGACAG  
TCAGGGGCCTGTGTTGATCTCGGAGCCACGCTCCTCGGTTGAATTCTCGAACGAGACC  
GGGGCCATGATCCATTGCTCGGCCCAGGGCAGCCCGTTGCCGAGGATTGATTGGCTCA  
TGGGGGACGAGTCGCCTGTCTCCCTATACCTCACATACGCGAGATGCTGGTCAACGG  
TTCCATGTACTTTTTGCCGTTTCGGAGCGGAGACCTACCGGCACGACGTCCACTCGGCC  
GTCTACAGATGTCAAGCCTCGAACAGCGTCGGTAGGGTATTGGGCCGTGAAATCACGG  
TAAAGGCCGTCGTGCGTCAAAAGTACGAGGTTCAAGTGCGAGACGCCTACGTCCTACC  
TGGAATACCGGTGTGCTCAGGTGCGAAATACCGACTTTCGTAAAGGAATACGTGGCA  
GTCACGTCCTGGGTTTCGAGATTCCGCCTACAACATCTTTCCAACGCCGAAAAGCGATG  
ACAGACATCACATGCTGCCGACTGGGGAACTCCTCGTGTTCTCGGTGACCTCCTCCGA  
CGCCAGTCCAGTTATCGTTGCAGGACCGTGACCGCGTCACCGGCGACACCGTGGA  
AGTTCCTCGTACGCGAGGCTCGTGGTCACCGGCGGTTTACGTACGTATGTGACGAGCA  
ATTACGCGTCAATATTTAAATCGAAACGATATTAATGTTTACGGACGCGTTGAAATCGTA  
ACGATGTCCCGAACTCGCGGAGGACTCGATGAGTTTTAAATTTTCTTCCGGGATAAACG  
TATCCCGGATTAATAATAAAGATTCTGACGTGCGATTGTCACGGCGTGTAATTAACGCGA  
TAAAGTAATGGGGGAAAAATGTAGAATGTAAACGGAAGGGGAGAGCGGGAATAAATG  
TAAATTTGTCGAGAGCGTAGCGGTTTCAATAATACGTAACAGCGACAAAAGGAAGGTC  
TTTCACGGTTGTGAAAAATTGATACCTTGAGATCTTTGCGACCCGTTTCAACGAAATCT  
CCGCGGAGATTTCTTTCCGAGATATTGAAATGCATTTTCGAGGTATCAAGGGGGAAGA  
GGATCGTGAAAAAATTTATGAAAGATGAAAAAGCAATTGAAATATAAGAACGGTAACC  
CTCATACGCCAGTTCCGCCGAGATTCAACGAACGAGTGAGTCCAGCGCCTATAAGGAC  
GGGGGAGACGATCGTCCTTTCTGCATCTCGCAGGGGATCCCGCCACCCATGTATCTAT  
GGTTTCGCGAGTCCGTGACGGGGACTGCGATGATCTTCAATTTCGGAGAGGATCTACGC  
GAGAGCAGGGGTCTCGTGTTGCAGTCGGCGAGGGCGGAGGACGCGGGGCGATACGT  
GTGCCACGCCAACAATAACGGCCGGTTCCGAGATGGTCGAATTGGAAGTCTCCATTATAA  
GCAGCCTCTCCATCCACCTGGTGCCTCAACAGGTGACCGTCGACCTGGGCAAGGACG  
CGGAATTTCAATGCTCGGTCACCGGCCAGCCAATCCCCGTCATATTCTGGACCAAGGA

CGGGCTTCCCGTGGGAGAGAGCGCCTCTGGTAGAAGCAAGATCACAGGCAACGACGG  
ATCCACGCTGCGCATTTCTCGGTCTGTGAGGGACGACAAGGGGATGTACCAATGCTTC  
GCGAAGAACGACTACGAGATGGTCCAAGCGACCGCCGAGTTGCGTCTGGGGGACGCG  
GCGCCGCAGCTTCTGTACAAATTCATCGAGCAGACCATCCAGCCCGGCCCTTCGGTGT  
CGCTCAAGTGCATCGCCACCGGGAACCCGACGCCGCACTTCTCCTGGACCCTGGACG  
GTTTCCCTCTTCCGCAGAACGACAG

>novel\_circ\_000340

GAGGAAGCTGAATCGACGTAACGGTCTACGCCAGGATGGCCAGTTGGCCGCTGAGAA  
TCGTGCTTCTGTCCAGCACCTCATCCTTGTCCGCGGGCGGGGAGTGGTGCTGGACAG  
TCAGGGGCCTGTGTTGATCTCGGAGCCACGCTCCTCGGTTGAATTCTCGAACGAGACC  
GGGGCCATGATCCATTGCTCGGCCCAGGGCAGCCCGTTGCCGAGGATTGATTGGCTCA  
TGGGGGACGAGTCGCCTGTCTCCCTATACCTCACATACGCGAGATGCTGGTCAACGG  
TTCCATGTACTTTTTTGGCGTTTCGGAGCGGAGACCTACCGGCACGACGTCCACTCGGCC  
GTCTACAGATGTCAAGCCTCGAACAGCGTCGGTAGGGTATTGGGCCGTGAAATCACGG  
TAAAGGCCGTCTGTGCGTCAAAAGTACGAGGTTCAAGTGCGAGACGCCTACGTCTACC  
TGGAATACCGGTGTGCTCAGGTGCGAAATACCGACTTTCGTAAAGGAATACGTGGCA  
GTCACGTCTGGGTTTCGAGATTCCGCCTACAACATCTTTCCAACGCCGAAAAGCGATG  
ACAGACATCACATGCTGCCGACTGGGGAACTCCTCGTGTTCTCGGTGACCTCCTCCGA  
CGCCAGTCCAGTTATCGTTGCAGGACCGTGCACCGCGTCACCGGCGACACCGTGGAA  
AGTTCCTCGTACGCGAGGCTCGTGGTACCGGCGGTTTACGTACGTATGTGACGAGCA  
ATTACGCGTCAATATTTAAATCGAAACGATATTAATGTTTACGGACGCGTTGAAATCGTA  
ACGATGTCCCGAACTCGCGGAGGACTCGATGAGTTTTAAATTTTCTTCCGGGATAAACG  
TATCCCGGATTAATAATAAAGATTCTGTACGTGCGATTGTCACGGCGTGTAATTAACGCGA  
TAAAGTAATGGGGGAAAAATGTAGAATGTAAACGGAAGGGGAGAGCGGGAATAAATG  
TAAATTTGTGCGAGAGCGTAGCGGTTTCAATAATACGTAACAGCGACAAAAGGAAGGTC  
TTTCACGGTTGTGAAAAATTGATACCTTGAGATCTTTGCGACCCGTTTCAACGAAATCT  
CCGCGGAGATTTCTTTCCGAGATATTCGAAATGCATTTTCGAGGTATCAAGGGGGAAGA  
GGATCGTGAAAAAATTTATGAAAGATGAAAAAGCAATTGAAATATAAGAACGGTAACC  
CTCATACGCCAGTTCCGCCGAGATTCAACGAACGAGTGAGTCCAGCGCCTATAAGGAC  
GGGGGAGACGATCGTCCTTTCTGCATCTCGCAGGGGATCCCGCCACCCATGTATCTAT  
GGTTTCGCGAGTCCGTGACGGGGACTGCGATGATCTTCAATTTCGAGAGGATCTACGC  
GAGAGCAGGGGTCTCTCGTGTGTCAGTCGGCGAGGGCGGAGGACGCGGGGCGATACGT  
GTGCCACGCCAACAATACGGCCGGTTCCGAGATGGTCAATTGGAAGTCTCCATTATAA  
GCAGCCTCTCCATCCACCTGGTGCCTCAACAGGTGACCGTCGACCTGGGCAAGGACG  
CGGAATTCCAATGCTCGGTACCGGCCAGCCAATCCCCGTCATATTCTGGACCAAGGA  
CGGGCTTCCCGTGGGAGAGAGCGCCTCTGGTAGAAGCAAGATCACAGGCAACGACGG  
ATCCACGCTGCGCATTTCTCGGTCTGTGAGGGACGACAAGGGGATGTACCAATGCTTC  
GCGAAGAACGACTACGAGATGGTCCAAGCGACCGCCGAGTTGCGTCTGGGGGACGCG  
GCGCCGCAGCTTCTGTACAAATTCATCGAGCAGACCATCCAGCCCGGCCCTTCGGTGT  
CGCTCAAGTGCATCGCCACCGGGAACCCGACGCCGCACTTCTCCTGGACCCTGGACG  
GTTTCCCTCTTCCGCAGAACGACAGGTTTATGATTGGGCAGTATGTGACGGTGCACGG  
GGACGTGATATCGCACGTGAACATCAGCGTGGTTCACGTGGAGGACGGAGGGGAGTA  
CCGGTGCACAGCGGCGAACCGGATGGCGAAGGTACACCATTTCGGCTCGTCTCAACATT



TACGGCCTGCCCCACGTACGCCCCGATGGGGAACTACGCCGCTGTGGCCGGCGAGACCA  
CCGTCATCAAATGTCCGGTCGCTGGTTTCCCAATAGCGAGCATCACTTGGGAGAAAGA  
CGGGAAGGTGTTACCGACGAGTCGACGTCAGGAAGTGTTCGCCAACGGTACGCTGGT  
GCTGCATCACGTCGACAGAAGCACCGATCACGGCGCATACACGTGCACGGCGAAGAA  
CAAACAAGGTCGCTCCGACTCTCAGACGGTCCACATCGAAGTGAAAG

>novel\_circ\_000341

GGCGGGGAGTGGTGCTGGACAGTCAGGGGGCCTGTGTTGATCTCGGAGCCACGCTCCT  
CGGTTGAATTCTCGAACGAGACCGGGGCCATGATCCATTGCTCGGCCCAGGGCAGCCC  
GTTGCCGAGGATTGATTGGCTCATGGGGGACGAGTCGCCTGTCCTCCCTATACCTCACA  
TACGCGAGATGCTGGTCAACGGTTCCATGTACTTTTTGCCGTTTCGGAGCGGAGACCTAC  
CGGCACGACGTCCACTCGGCCGTCTACAGATGTCAAGCCTCGAACAGCGTCGGTAGG  
GTATTGGGCCGTGAAATCACGGTAAAGGCCG

>novel\_circ\_000342

GGCGGGGAGTGGTGCTGGACAGTCAGGGGGCCTGTGTTGATCTCGGAGCCACGCTCCT  
CGGTTGAATTCTCGAACGAGACCGGGGCCATGATCCATTGCTCGGCCCAGGGCAGCCC  
GTTGCCGAGGATTGATTGGCTCATGGGGGACGAGTCGCCTGTCCTCCCTATACCTCACA  
TACGCGAGATGCTGGTCAACGGTTCCATGTACTTTTTGCCGTTTCGGAGCGGAGACCTAC  
CGGCACGACGTCCACTCGGCCGTCTACAGATGTCAAGCCTCGAACAGCGTCGGTAGG  
GTATTGGGCCGTGAAATCACGGTAAAGGCCGTCGTGCGTCAAAAGTACGAGGTTCAAG  
TGCGAGACGCCTACGTCCTACCTGGAAATACCGGTGTGCTCAGGTGCGAAATACCGAC  
TTTCGTTAAGGAATACGTGGCAGTCACGTCCTGGGTTTCGAGATTCCGCCTACAACATCT  
TTCCAACGCCGAAAAGCG

>novel\_circ\_000344

GGCGGGGAGTGGTGCTGGACAGTCAGGGGGCCTGTGTTGATCTCGGAGCCACGCTCCT  
CGGTTGAATTCTCGAACGAGACCGGGGCCATGATCCATTGCTCGGCCCAGGGCAGCCC  
GTTGCCGAGGATTGATTGGCTCATGGGGGACGAGTCGCCTGTCCTCCCTATACCTCACA  
TACGCGAGATGCTGGTCAACGGTTCCATGTACTTTTTGCCGTTTCGGAGCGGAGACCTAC  
CGGCACGACGTCCACTCGGCCGTCTACAGATGTCAAGCCTCGAACAGCGTCGGTAGG  
GTATTGGGCCGTGAAATCACGGTAAAGGCCGTCGTGCGTCAAAAGTACGAGGTTCAAG  
TGCGAGACGCCTACGTCCTACCTGGAAATACCGGTGTGCTCAGGTGCGAAATACCGAC  
TTTCGTTAAGGAATACGTGGCAGTCACGTCCTGGGTTTCGAGATTCCGCCTACAACATCT  
TTCCAACGCCGAAAAGCGATGACAGACATCACATGCTGCCGACTGGGGAACTCCTCGT  
GTTCTCGGTGACCTCCTCCGACGCCAGTCCAGTTATCGTTGCAGGACCGTGACCCG  
GTCACCGGCGACACCGTGGAAGTTCCTCGTACGCGAGGCTCGTGGTCACCG

>novel\_circ\_000345

GGCGGGGAGTGGTGCTGGACAGTCAGGGGGCCTGTGTTGATCTCGGAGCCACGCTCCT  
CGGTTGAATTCTCGAACGAGACCGGGGCCATGATCCATTGCTCGGCCCAGGGCAGCCC  
GTTGCCGAGGATTGATTGGCTCATGGGGGACGAGTCGCCTGTCCTCCCTATACCTCACA  
TACGCGAGATGCTGGTCAACGGTTCCATGTACTTTTTGCCGTTTCGGAGCGGAGACCTAC  
CGGCACGACGTCCACTCGGCCGTCTACAGATGTCAAGCCTCGAACAGCGTCGGTAGG

GTATTGGGCCGTGAAATCACGGTAAAGGCCGTCGTGCGTCAAAAGTACGAGGTTCAAG  
TGCGAGACGCCTACGTCCTACCTGGAAATACCGGTGTGCTCAGGTGCGAAATACCGAC  
TTTCGTTAAGGAATACGTGGCAGTCACGTCCTGGGTTTCGAGATTCCGCCTACAACATCT  
TTCCAACGCCGAAAAGCGATGACAGACATCACATGCTGCCGACTGGGGAACTCCTCGT  
GTTCTCGGTGACCTCCTCCGACGCCCAGTCCAGTTATCGTTGCAGGACCGTGCACCGC  
GTCACCGGCGACACCGTGGAAAGTTCCTCGTACGCGAGGCTCGTGGTCACCGGCGGT  
TTACGTACGTATGTGACGAGCAATTACGCGTCAATATTTAAATCGAAACGATATTAATGT  
TTACGGACGCGTTGAAATCGTAACGATGTCCCGAACTCGCGGAGGACTCGATGAGTTT  
TAAATTTTCTTCCGGGATAAACGTATCCCGGATTAATAATAAAGATTTCGTACGTGCGATT  
GTCACGGCGTGTAATTAACGCGATAAAGTAATGGGGGAAAAATGTAGAATGTAAACGG  
AAGGGGAGAGCGGGAATAAATGTAAATTTGTCGAGAGCGTAGCGGTTTCAATAATACG  
TAACAGCGACAAAAGGAAGGTCTTTCACGGTTGTGAAAAATTGATACCTTGAGATCTT  
TGCGACCCGTTTCAACGAAATCTCCGCGGAGATTTCTTTCCGAGATATTCGAAATGCAT  
TTTCGAGGTATCAAGGGGGAAGAGGATCGTGAAAAATTTATGAAAGATGAAAAAGC  
AATTGAAATATAAGAACGGTAACCCCTCATACGCCAGTTCCGCCGAGATTCAACGAACG  
AGTGAGTCCAGCGCCTATAAGGACGGGGGAGACGATCGTCCTTTCCTGCATCTCGCAG  
GGGATCCCGCCACCCATGTATCTATGGTTTCGCGAGTCCGTGACGGGGACTGCGATGAT  
CTTCAATTCGGAGAGGATCTACGCGAGAGCAGGGGTCTCTGTGTTGCAGTCGGCGAGG  
GCGGAGGACGCGGGGCGATACGTGTGCCACGCCAACAATACGGCCGGTTCCGAGATG  
GTCGAATTGGAAGTCTCCATTATAAGCAGCCTCTCCATCCACCTGGTGCCTCAACAG

>novel\_circ\_000346

GGCGGGGAGTGGTGCTGGACAGTCAGGGGCCTGTGTTGATCTCGGAGCCACGCTCCT  
CGGTTGAATTCTCGAACGAGACCGGGGCCATGATCCATTGCTCGGCCCAGGGCAGCCC  
GTTGCCGAGGATTGATTGGCTCATGGGGGACGAGTCGCCTGTCTCCCTATACCTCACA  
TACGCGAGATGCTGGTCAACGGTTCATGTACTTTTTGCCGTTTCGGAGCGGAGACCTAC  
CGGCACGACGTCCACTCGGCCGTCTACAGATGTCAAGCCTCGAACAGCGTCGGTAGG  
GTATTGGGCCGTGAAATCACGGTAAAGGCCGTCGTGCGTCAAAAGTACGAGGTTCAAG  
TGCGAGACGCCTACGTCCTACCTGGAAATACCGGTGTGCTCAGGTGCGAAATACCGAC  
TTTCGTTAAGGAATACGTGGCAGTCACGTCCTGGGTTTCGAGATTCCGCCTACAACATCT  
TTCCAACGCCGAAAAGCGATGACAGACATCACATGCTGCCGACTGGGGAACTCCTCGT  
GTTCTCGGTGACCTCCTCCGACGCCCAGTCCAGTTATCGTTGCAGGACCGTGCACCGC  
GTCACCGGCGACACCGTGGAAAGTTCCTCGTACGCGAGGCTCGTGGTCACCGGCGGT  
TTACGTACGTATGTGACGAGCAATTACGCGTCAATATTTAAATCGAAACGATATTAATGT  
TTACGGACGCGTTGAAATCGTAACGATGTCCCGAACTCGCGGAGGACTCGATGAGTTT  
TAAATTTTCTTCCGGGATAAACGTATCCCGGATTAATAATAAAGATTTCGTACGTGCGATT  
GTCACGGCGTGTAATTAACGCGATAAAGTAATGGGGGAAAAATGTAGAATGTAAACGG  
AAGGGGAGAGCGGGAATAAATGTAAATTTGTCGAGAGCGTAGCGGTTTCAATAATACG  
TAACAGCGACAAAAGGAAGGTCTTTCACGGTTGTGAAAAATTGATACCTTGAGATCTT  
TGCGACCCGTTTCAACGAAATCTCCGCGGAGATTTCTTTCCGAGATATTCGAAATGCAT  
TTTCGAGGTATCAAGGGGGAAGAGGATCGTGAAAAATTTATGAAAGATGAAAAAGC  
AATTGAAATATAAGAACGGTAACCCCTCATACGCCAGTTCCGCCGAGATTCAACGAACG  
AGTGAGTCCAGCGCCTATAAGGACGGGGGAGACGATCGTCCTTTCCTGCATCTCGCAG  
GGGATCCCGCCACCCATGTATCTATGGTTTCGCGAGTCCGTGACGGGGACTGCGATGAT

CTTCAATTCGGAGAGGATCTACGCGAGAGCAGGGGTCCTCGTGTTGCAGTCGGCGAGG  
GCGGAGGACGCGGGGCGATACGTGTGCCACGCCAACAATACGGCCGGTTCCGAGATG  
GTCGAATTGGAAGTCTCCATTATAAGCAGCCTCTCCATCCACCTGGTGCCTCAACAGGT  
GACCGTCGACCTGGGCAAGGACGCGGAATTCCAATGCTCGGTCACCGGCCAGCCAAT  
CCCCGTCATATTCTGGACCAAGGACGGGCTTCCCGTGGGAGAGAGCGCCTCTGGTAGA  
AGCAAGATCACAGGCAACGACGGATCCACGCTGCGCATTTCTCGGTCGTGAGGGAC  
GACAAGGGGATGTACCAATGCTTCGCGAAGAACGACTACGAGATGGTCCAAGCGACC  
GCCGAGTTGCGTCTGGGGG

>novel\_circ\_000347

GGCGGGGAGTGGTGCTGGACAGTCAGGGGCCTGTGTTGATCTCGGAGCCACGCTCCT  
CGGTTGAATTCTCGAACGAGACCGGGGCCATGATCCATTGCTCGGCCCAGGGCAGCCC  
GTTGCCGAGGATTGATTGGCTCATGGGGACGAGTCGCCTGTCTCCCTATACCTCACA  
TACGCGAGATGCTGGTCAACGGTTCATGTACTTTTTGCCGTTTCGGAGCGGAGACCTAC  
CGGCACGACGTCCACTCGGCCGTCTACAGATGTCAAGCCTCGAACAGCGTCGGTAGG  
GTATTGGGCCGTGAAATCACGGTAAAGGCCGTGCTGCGTCAAAAGTACGAGGTTCAAG  
TGCGAGACGCCTACGTCTTACCTGGAAATACCGGTGTGCTCAGGTGCGAAATACCGAC  
TTTCGTTAAGGAATACGTGGCAGTCACGTCTGGGTTTCGAGATTCCGCCTACAACATCT  
TTCCAACGCCGAAAAGCGATGACAGACATCACATGCTGCCGACTGGGGAACTCCTCGT  
GTTCTCGGTGACCTCCTCCGACGCCCAGTCCAGTTATCGTTGCAGGACCGTGCACCGC  
GTCACCGGCGACACCGTGGAAGTTCTCTGACGCGAGGCTCGTGGTCACCGGCGGT  
TTACGTACGTATGTGACGAGCAATTACGCGTCAATATTTAAATCGAAACGATATTAATGT  
TTACGGACGCGTTGAAATCGTAACGATGTCCCGAACTCGCGGAGGACTCGATGAGTTT  
TAAATTTTCTTCCGGGATAAACGTATCCCGGATTAATAATAAAGATTTCGTACGTGCGATT  
GTCACGGCGTGTAATTAACGCGATAAAGTAATGGGGGAAAAATGTAGAATGTAAACGG  
AAGGGGAGAGCGGGAATAAATGTAAATTTGTCGAGAGCGTAGCGGTTTCGAATAATACG  
TAACAGCGACAAAAGGAAGGTCTTTCACGGTTGTGAAAAATTGATACCTTGAGATCTT  
TGCGACCCGTTTCAACGAAATCTCCGCGGAGATTTCTTTCCGAGATATTCGAAATGCAT  
TTTCGAGGTATCAAGGGGGAAGAGGATCGTGAAAAATTTATGAAAGATGAAAAAGC  
AATTGAAATATAAGAACGGTAACCTCATACGCCAGTTCGCGCGAGATTCAACGAACG  
AGTGAGTCCAGCGCCTATAAGGACGGGGGAGACGATCGTCCTTTCCTGCATCTCGCAG  
GGGATCCCGCCACCCATGTATCTATGGTTTCGCGAGTCCGTGACGGGGACTGCGATGAT  
CTTCAATTCGGAGAGGATCTACGCGAGAGCAGGGGTCCTCGTGTTGCAGTCGGCGAGG  
GCGGAGGACGCGGGGCGATACGTGTGCCACGCCAACAATACGGCCGGTTCCGAGATG  
GTCGAATTGGAAGTCTCCATTATAAGCAGCCTCTCCATCCACCTGGTGCCTCAACAGGT  
GACCGTCGACCTGGGCAAGGACGCGGAATTCCAATGCTCGGTCACCGGCCAGCCAAT  
CCCCGTCATATTCTGGACCAAGGACGGGCTTCCCGTGGGAGAGAGCGCCTCTGGTAGA  
AGCAAGATCACAGGCAACGACGGATCCACGCTGCGCATTTCTCGGTCGTGAGGGAC  
GACAAGGGGATGTACCAATGCTTCGCGAAGAACGACTACGAGATGGTCCAAGCGACC  
GCCGAGTTGCGTCTGGGGGACGCGGCGCCGACGCTTCTGTACAAATTCATCGAGCAGA  
CCATCCAGCCCGGCCCTTCGGTGTGCTCAAGTGCATCGCCACCGGGAACCCGACGCC  
GCACTTCTCCTGGACCCTGGACGGTTTCCCTCTTCCGCAGAACGACAG

>novel\_circ\_000348

GGCGGGGAGTGGTGCTGGACAGTCAGGGGCCTGTGTTGATCTCGGAGCCACGCTCCT  
CGGTTGAATTCTCGAACGAGACCGGGGCCATGATCCATTGCTCGGCCCAGGGCAGCCC  
GTTGCCGAGGATTGATTGGCTCATGGGGGACGAGTCGCCTGTCTCCCTATACCTCACA  
TACGCGAGATGCTGGTCAACGGTTCCATGTACTTTTTGCCGTTTCGGAGCGGAGACCTAC  
CGGCACGACGTCCACTCGGCCGTCTACAGATGTCAAGCCTCGAACAGCGTCGGTAGG  
GTATTGGGCCGTGAAATCACGGTAAAGGCCGTCGTGCGTCAAAAGTACGAGGTTCAAG  
TGCAGACGCCTACGTCCTACCTGGAAATACCGGTGTGCTCAGGTGCGAAATACCGAC  
TTTCGTTAAGGAATACGTGGCAGTCACGTCCTGGGTTTCGAGATTCCGCCTACAACATCT  
TTCCAACGCCGAAAAGCGATGACAGACATCACATGCTGCCGACTGGGGAACTCCTCGT  
GTTCTCGGTGACCTCCTCCGACGCCAGTCCAGTTATCGTTGCAGGACCGTGCACCGC  
GTCACCGGCGACACCGTGGAAAGTTCTCTGACGCGAGGCTCGTGGTCACCGGCGGT  
TTACGTACGTATGTGACGAGCAATTACGCGTCAATATTTAAATCGAAACGATATTAATGT  
TTACGGACGCGTTGAAATCGTAACGATGTCCCGAACTCGCGGAGGACTCGATGAGTTT  
TAAATTTTCTTCCGGGATAAACGTATCCCGGATTAATAATAAAGATTTCGTACGTGCGATT  
GTCACGGCGTGTAATTAACGCGATAAAGTAATGGGGGAAAAATGTAGAATGTAAACGG  
AAGGGGAGAGCGGGAATAAATGTAAATTTGTCGAGAGCGTAGCGGTTTCGAATAATACG  
TAACAGCGACAAAAGGAAGGTCTTTCACGGTTGTGAAAAATTGATACCTTGAGATCTT  
TGCGACCCGTTTCAACGAAATCTCCGCGGAGATTTCTTTCCGAGATATTCGAAATGCAT  
TTTCGAGGTATCAAGGGGGAAGAGGATCGTGAAAAAATTTATGAAAGATGAAAAAGC  
AATTGAAATATAAGAACGGTAACCTCATACGCCAGTTCGCGCGAGATTCAACGAACG  
AGTGAGTCCAGCGCCTATAAGGACGGGGGAGACGATCGTCCTTTCCTGCATCTCGCAG  
GGGATCCCGCCACCCATGTATCTATGGTTTCGCGAGTCCGTGACGGGGACTGCGATGAT  
CTTCAATTCGGAGAGGATCTACGCGAGAGCAGGGGTCTCTGTGTTGCAGTCGGCGAGG  
GCGGAGGACGCGGGGCGATACGTGTGCCACGCCAACAATACGGCCGGTTCCGAGATG  
GTCGAATTGGAAGTCTCCATTATAAGCAGCCTCTCCATCCACCTGGTGCCTCAACAGGT  
GACCGTCGACCTGGGCAAGGACGCGGAATTCCAATGCTCGGTCACCGGCCAGCCAAT  
CCCCGTCAATTTCTGGACCAAGGACGGGCTTCCCGTGGGAGAGAGCGCCTCTGGTAGA  
AGCAAGATCACAGGCAACGACGGATCCACGCTGCGCATTTCTCGGTCTGTGAGGGAC  
GACAAGGGGATGTACCAATGCTTCGCGAAGAACGACTACGAGATGGTCCAAGCGACC  
GCCGAGTTGCGTCTGGGGGACGCGGCGCCGACGTTCTGTACAAATTCATCGAGCAGA  
CCATCCAGCCCGGCCCTTCGGTGTGCTCAAGTGCATCGCCACCGGGAACCCGACGCC  
GCACTTCTCCTGGACCCTGGACGGTTTCCCTCTTCCGCAGAACGACAGGTTTATGATTG  
GGCAGTATGTGACGGTGCACGGGGACGTGATATCGCACGTGAACATCAGCGTGTTCA  
CGTGAGGACGAGGGGAGTACCGGTGCACAGCGGCGAACCGGATGGCGAAGGTAC  
ACCATTCGGCTCGTCTCAACATTTACGGCCTGCCCCACGTACGCCCAGTGGGGAACCTAC  
GCCGCTGTGGCCGGCGAGACCACCGTCATCAAATGTCCGGTCGCTGGTTTCCCAATAG  
CGAGCATCACTTGGGAGAAAG

>novel\_circ\_000349

GGCGGGGAGTGGTGCTGGACAGTCAGGGGCCTGTGTTGATCTCGGAGCCACGCTCCT  
CGGTTGAATTCTCGAACGAGACCGGGGCCATGATCCATTGCTCGGCCCAGGGCAGCCC  
GTTGCCGAGGATTGATTGGCTCATGGGGGACGAGTCGCCTGTCTCCCTATACCTCACA  
TACGCGAGATGCTGGTCAACGGTTCCATGTACTTTTTGCCGTTTCGGAGCGGAGACCTAC  
CGGCACGACGTCCACTCGGCCGTCTACAGATGTCAAGCCTCGAACAGCGTCGGTAGG

GTATTGGGCCGTGAAATCACGGTAAAGGCCGTCGTGCGTCAAAAGTACGAGGTTCAAG  
TGCGAGACGCCTACGTCCTACCTGGAAATACCGGTGTGCTCAGGTGCGAAATACCGAC  
TTTCGTTAAGGAATACGTGGCAGTCACGTCCTGGGTTTCGAGATTCCGCCTACAACATCT  
TTCCAACGCCGAAAAGCGATGACAGACATCACATGCTGCCGACTGGGGAACTCCTCGT  
GTTCTCGGTGACCTCCTCCGACGCCCAGTCCAGTTATCGTTGCAGGACCGTGCACCGC  
GTCACCGGCGACACCGTGGAAAGTTCCTCGTACGCGAGGCTCGTGGTCACCGGCGGT  
TTACGTACGTATGTGACGAGCAATTACGCGTCAATATTTAAATCGAAACGATATTAATGT  
TTACGGACGCGTTGAAATCGTAACGATGTCCCGAACTCGCGGAGGACTCGATGAGTTT  
TAAATTTTCTTCCGGGATAAACGTATCCCGGATTAATAATAAAGATTTCGTACGTGCGATT  
GTCACGGCGTGTAATTAACGCGATAAAGTAATGGGGGAAAAATGTAGAATGTAAACGG  
AAGGGGAGAGCGGGAATAAATGTAAATTTGTCGAGAGCGTAGCGGTTTCAATAATACG  
TAACAGCGACAAAAGGAAGGTCTTTCACGGTTGTGAAAAATTGATACCTTGAGATCTT  
TGCGACCCGTTTCAACGAAATCTCCGCGGAGATTTCTTTCCGAGATATTCGAAATGCAT  
TTTCGAGGTATCAAGGGGGAAGAGGATCGTGAAAAATTTATGAAAGATGAAAAAGC  
AATTGAAATATAAGAACGGTAACCCCTCATACGCCAGTTCCGCCGAGATTCAACGAACG  
AGTGAGTCCAGCGCCTATAAGGACGGGGGAGACGATCGTCCTTTCCTGCATCTCGCAG  
GGGATCCCGCCACCCATGTATCTATGGTTTCGCGAGTCCGTGACGGGGACTGCGATGAT  
CTTCAATTCGGAGAGGATCTACGCGAGAGCAGGGGTCTCTGTGTTGCAGTCGGCGAGG  
GCGGAGGACGCGGGGCGATACGTGTGCCACGCCAACAATACGGCCGGTTCCGAGATG  
GTCGAATTGGAAGTCTCCATTATAAGCAGCCTCTCCATCCACCTGGTGCCTCAACAGGT  
GACCGTCGACCTGGGCAAGGACGCGGAATTCGAATGCTCGGTACCGGCCAGCCAAT  
CCCCGTCATATTCTGGACCAAGGACGGGCTTCCCGTGGGAGAGAGCGCCTCTGGTAGA  
AGCAAGATCACAGGCAACGACGGATCCACGCTGCGCATTTCTTCGGTCGTGAGGGAC  
GACAAGGGGATGTACCAATGCTTCGCGAAGAACGACTACGAGATGGTCCAAGCGACC  
GCCGAGTTGCGTCTGGGGGACGCGGCGCCGACGCTTCTGTACAAATTCATCGAGCAGA  
CCATCCAGCCCGGCCCTTCGGTGTGCTCAAGTGCATCGCCACCGGGAACCCGACGCC  
GCACTTCTCCTGGACCCTGGACGGTTTCCCTCTTCCGCAGAACGACAGGTTTATGATTG  
GGCAGTATGTGACGGTGCACGGGGACGTGATATCGCACGTGAACATCAGCGTGTTCA  
CGTGGAGGACGGAGGGGAGTACCGGTGCACAGCGGCGAACCGGATGGCGAAGGTAC  
ACCATTCCGGCTCGTCTCAACATTTACGGCCTGCCCCACGTACGCCCGATGGGGAACTAC  
GCCGCTGTGGCCGGCGAGACCACCGTCATCAAATGTCCGGTCGCTGGTTTCCCAATAG  
CGAGCATCACTTGGGAGAAAGACGGGAAGGTGTTACCGACGAGTCGACGTCAGGAAG  
TGTTCCCGAACGGTACGCTGGTGCTGCATCACGTCGACAGAAGCACCGATCACGGCGC  
ATACACGTGCACGGCGAAGAACAACAAGGTGCTCCGACTCTCAGACGGTCCACAT  
CGAAGTGAAAG

>novel\_circ\_000350

GGCGGGGAGTGGTGCTGGACAGTCAGGGGCCTGTGTTGATCTCGGAGCCACGCTCCT  
CGGTTGAATTCTCGAACGAGACCGGGGCCATGATCCATTGCTCGGCCAGGGCAGCCC  
GTTGCCGAGGATTGATTGGCTCATGGGGGACGAGTCGCCTGTCTCCCTATACCTCACA  
TACGCGAGATGCTGGTCAACGGTTCCATGTACTTTTTGCCGTTTCGGAGCGGAGACCTAC  
CGGCACGACGTCCACTCGGCCGTCTACAGATGTCAAGCCTCGAACAGCGTCGGTAGG  
GTATTGGGCCGTGAAATCACGGTAAAGGCCGTCGTGCGTCAAAAGTACGAGGTTCAAG  
TGCGAGACGCCTACGTCCTACCTGGAAATACCGGTGTGCTCAGGTGCGAAATACCGAC

TTTCGTTAAGGAATACGTGGCAGTCACGTCCTGGGTTTCGAGATTCCGCCTACAACATCT  
TTCCAACGCCGAAAAGCGATGACAGACATCACATGCTGCCGACTGGGGAACCTCTCGT  
GTTCTCGGTGACCTCCTCCGACGCCAGTCCAGTTATCGTTGCAGGACCGTGCACCGC  
GTCACCGGCGACACCGTGGAAAGTTCCTCGTACGCGAGGCTCGTGGTCACCGGCGGT  
TTACGTACGTATGTGACGAGCAATTACGCGTCAATATTTAAATCGAAACGATATTAATGT  
TTACGGACGCGTTGAAATCGTAACGATGTCCCGAACTCGCGGAGGACTCGATGAGTTT  
TAAATTTTCTTCCGGGATAAACGTATCCCGGATTAATAATAAAGATTTCGTACGTGCGATT  
GTCACGGCGTGTAATTAACGCGATAAAGTAATGGGGGAAAAATGTAGAATGTAAACGG  
AAGGGGAGAGCGGGAATAAATGTAAATTTGTGAGAGCGTAGCGGTTTCAATAATACG  
TAACAGCGACAAAAGGAAGGTCTTTCACGGTTGTGAAAAATTGATACCTTGAGATCTT  
TGCGACCCGTTTCAACGAAATCTCCGCGGAGATTTCTTTCCGAGATATTCGAAATGCAT  
TTTCGAGGTATCAAGGGGGAAGAGGATCGTGAAAAATTTATGAAAGATGAAAAAGC  
AATTGAAATATAAGAACGGTAACCCCTCATACGCCAGTTCGCGCGAGATTCAACGAACG  
AGTGAGTCCAGCGCCTATAAGGACGGGGGAGACGATCGTCCTTTCCTGCATCTCGCAG  
GGGATCCCGCCACCCATGTATCTATGGTTTCGCGAGTCCGTGACGGGGACTGCGATGAT  
CTTCAATTCGGAGAGGATCTACGCGAGAGCAGGGGTCTCTCGTGTTCAGTTCGGCGAGG  
GCGGAGGACGCGGGGCGATACGTGTGCCACGCCAACAATACGGCCGGTTCCGAGATG  
GTCGAATTGGAAGTCTCCATTATAAGCAGCCTCTCCATCCACCTGGTGCCTCAACAGGT  
GACCGTCGACCTGGGCAAGGACGCGGAATTCCAATGCTCGGTCACCGGCCAGCCAAT  
CCCCGTCATATTCTGGACCAAGGACGGGCTTCCCGTGGGAGAGAGCGCCTCTGGTAGA  
AGCAAGATCACAGGCAACGACGGATCCACGCTGCGCATTTCTCGGTTCGTGAGGGAC  
GACAAGGGGATGTACCAATGCTTCGCGAAGAACGACTACGAGATGGTCCAAGCGACC  
GCCGAGTTGCGTCTGGGGGACGCGGCGCCGAGCTTCTGTACAAATTCATCGAGCAGA  
CCATCCAGCCCCGGCCCTTCGGTGTGCTCAAGTGCATCGCCACCGGGAACCCGACGCC  
GCACTTCTCCTGGACCCTGGACGGTTTCCCTCTTCCGCAGAACGACAGGTTTATGATTG  
GGCAGTATGTGACGGTGCACGGGGACGTGATATCGCACGTGAACATCAGCGTGGTTCA  
CGTGAGGACGGAGGGGAGTACCGGTGCACAGCGGCGAACCGGATGGCGAAGGTAC  
ACCATTCGGTCTCGTCTCAACATTTACGGCCTGCCCCACGTACGCCCGATGGGGAACCTAC  
GCCGCTGTGGCCGGCGAGACCACCGTCATCAAATGTCCGGTCGCTGGTTTCCCAATAG  
CGAGCATCACTTGGGAGAAAGACGGGAAGGTGTTACCGACGAGTCGACGTCAGGAAG  
TGTTCCCGAACGGTACGCTGGTGTGATCACGTGACAGAGAACCGATCACGGCGC  
ATACACGTGCACGGCGAAGAACAACAAGGTGCTCCGACTCTCAGACGGTCCACAT  
CGAAGTGAAAGTACCGCCTAAAATCGATCCGTTTAGCTTTCCTGCCAATATACAAGAAG  
GCGCGCGGGTGCACGTGGTGTGCGTGGTCAGCGAGGGGCGATTACCGTTGAAGATCA  
CCTGGCTGAAGGATGGCAGGCCATTGAATTCCACGGAGACGACCACCCATCATATCGG  
CGAATACGATCTCACGTTGATGATACAGAGCGCGACCACGGCCATAATGGCAACTATA  
CGTGCGTGGCGAGCAACGATGCCGCCGAAACGTCTCGCACGGCATCCCTGTTGGTCCA  
CG

>novel\_circ\_000351

TCGTGCGTCAAAAGTACGAGGTTCAAGTGCGAGACGCCTACGTCCTACCTGGAAATAC  
CGGTGTGCTCAGGTGCGAAATACCGACTTTCGTTAAGGAATACGTGGCAGTCACGTCC  
TGGGTTTCGAGATTCCGCCTACAACATCTTTCACCGCCGAAAAGCGATGACAGACATC  
ACATGCTGCCGACTGGGGAACCTCTCGTGTTCGCGTACCTCCTCCGACGCCAGTC

CAGTTATCGTTGCAGGACCGTGCACCGCGTCACCGGCGACACCGTGGAAGTTCCTCG  
TACGCGAGGCTCGTGGTCACCG

>novel\_circ\_000352

TCGTGCGTCAAAAGTACGAGGTTCAAGTGCGAGACGCCTACGTCCTACCTGGAAATAC  
CGGTGTGCTCAGGTGCGAAATACCGACTTTTCGTTAAGGAATACGTGGCAGTCACGTCC  
TGGGTTTCGAGATTCCGCCTACAACATCTTTCCAACGCCGAAAAGCGATGACAGACATC  
ACATGCTGCCGACTGGGGAACCTCGTGTTCTCGGTGACCTCCTCCGACGCCAGTC  
CAGTTATCGTTGCAGGACCGTGCACCGCGTCACCGGCGACACCGTGGAAGTTCCTCG  
TACGCGAGGCTCGTGGTCACCGGCGGTTTACGTACGTATGTGACGAGCAATTACGCGT  
CAATATTTAAATCGAAACGATATTAATGTTTACGGACGCGTTGAAATCGTAACGATGTCC  
CGAACTCGCGGAGGACTCGATGAGTTTTAAATTTTCTTCCGGGATAAACGTATCCCGGA  
TTAATAATAAAGATTTCGTACGTGCGATTGTCACGGCGTGTAATTAACGCGATAAAGTAAT  
GGGGGAAAAATGTAGAATGTAAACGGAAGGGGAGAGCGGGAATAAATGTAAATTTGT  
CGAGAGCGTAGCGGTTTCAATAATACGTAACAGCGACAAAAGGAAGGTCTTTCACGGT  
TGTGAAAAATTGATACCTTGAGATCTTTGCGACCCGTTTCAACGAAATCTCCGCGGAGA  
TTTCTTTCCGAGATATTCGAAATGCATTTTCGAGGTATCAAGGGGGAAGAGGATCGTGG  
AAAAATTTATGAAAGATGAAAAAGCAATTGAAATATAAGAACGGTAACCCCTCATACGC  
CAGTTCCGCCGAGATTCAACGAACGAGTGAGTCCAGCGCCTATAAGGACGGGGGAGA  
CGATCGTCCTTTCTGCATCTCGCAGGGGATCCCGCCACCCATGTATCTATGGTTTCGCG  
AGTCCGTGACGGGGACTGCGATGATCTTCAATTCGGAGAGGATCTACGCGAGAGCAGG  
GGTCCTCGTGTTGCAGTCGGCGAGGGCGGAGGACGCGGGGCGATACGTGTGCCACGC  
CAACAATACGGCCGTTCCGAGATGGTCGAATTGGAAGTCTCCATTATAAGCAGCCTCT  
CCATCCACCTGGTGCCTCAACAG

>novel\_circ\_000353

TCGTGCGTCAAAAGTACGAGGTTCAAGTGCGAGACGCCTACGTCCTACCTGGAAATAC  
CGGTGTGCTCAGGTGCGAAATACCGACTTTTCGTTAAGGAATACGTGGCAGTCACGTCC  
TGGGTTTCGAGATTCCGCCTACAACATCTTTCCAACGCCGAAAAGCGATGACAGACATC  
ACATGCTGCCGACTGGGGAACCTCGTGTTCTCGGTGACCTCCTCCGACGCCAGTC  
CAGTTATCGTTGCAGGACCGTGCACCGCGTCACCGGCGACACCGTGGAAGTTCCTCG  
TACGCGAGGCTCGTGGTCACCGGCGGTTTACGTACGTATGTGACGAGCAATTACGCGT  
CAATATTTAAATCGAAACGATATTAATGTTTACGGACGCGTTGAAATCGTAACGATGTCC  
CGAACTCGCGGAGGACTCGATGAGTTTTAAATTTTCTTCCGGGATAAACGTATCCCGGA  
TTAATAATAAAGATTTCGTACGTGCGATTGTCACGGCGTGTAATTAACGCGATAAAGTAAT  
GGGGGAAAAATGTAGAATGTAAACGGAAGGGGAGAGCGGGAATAAATGTAAATTTGT  
CGAGAGCGTAGCGGTTTCAATAATACGTAACAGCGACAAAAGGAAGGTCTTTCACGGT  
TGTGAAAAATTGATACCTTGAGATCTTTGCGACCCGTTTCAACGAAATCTCCGCGGAGA  
TTTCTTTCCGAGATATTCGAAATGCATTTTCGAGGTATCAAGGGGGAAGAGGATCGTGG  
AAAAATTTATGAAAGATGAAAAAGCAATTGAAATATAAGAACGGTAACCCCTCATACGC  
CAGTTCCGCCGAGATTCAACGAACGAGTGAGTCCAGCGCCTATAAGGACGGGGGAGA  
CGATCGTCCTTTCTGCATCTCGCAGGGGATCCCGCCACCCATGTATCTATGGTTTCGCG  
AGTCCGTGACGGGGACTGCGATGATCTTCAATTCGGAGAGGATCTACGCGAGAGCAGG  
GGTCCTCGTGTTGCAGTCGGCGAGGGCGGAGGACGCGGGGCGATACGTGTGCCACGC

CAACAATACGGCCGGTTCCGAGATGGTCTGAATTGGAAGTCTCCATTATAAGCAGCCTCT  
CCATCCACCTGGTGCCTCAACAGGTGACCGTCGACCTGGGCAAGGACGCGGAATTCC  
AATGCTCGGTACCGGCCAGCCAATCCCCGTCATATTCTGGACCAAGGACGGGGCTTCC  
CGTGGGAGAGAGCGCCTCTGGTAGAAGCAAGATCACAGGCAACGACGGATCCACGCT  
GCGCATTTCTCTCGGTCTGTAGGGACGACAAGGGGATGTACCAATGCTTCGCGAAGAAC  
GACTACGAGATGGTCCAAGCGACCGCCGAGTTGCGTCTGGGGG

>novel\_circ\_000355

ATGACAGACATCACATGCTGCCGACTGGGGAACTCCTCGTGTTCTCGGTGACCTCCTC  
CGACGCCCAGTCCAGTTATCGTTGCAGGACCGTGCACCGCGTCACCGGCGACACCGTG  
GAAAGTTCCTCGTACGCGAGGCTCGTGGTCAACGGCGGTTTACGTACGTATGTGACGA  
GCAATTACGCGTCAATATTTAAATCGAAACGATATTAATGTTTACGGACGCGTTGAAATC  
GTAACGATGTCCCGAACTCGCGGAGGACTCGATGAGTTTAAATTTTCTTCCGGGATAA  
ACGTATCCCGGATTAATAATAAAGATTTCGTACGTGCGATTGTCACGGCGTGTAATTAACG  
CGATAAAGTAATGGGGGAAAAATGTAGAATGTAAACGGAAGGGGAGAGCGGGAATAA  
ATGTAAATTTGTTCGAGAGCGTAGCGGTTTCAATAATACGTAACAGCGACAAAAGGAAG  
GTCTTTCACGGTTGTGAAAAATTGATACCTTGAGATCTTTGCGACCCGTTTCAACGAAA  
TCTCCGCGGAGATTCTTTCCGAGATATTCGAAATGCATTTTCGAGGTATCAAGGGGGA  
AGAGGATCGTGAAAAAATTTATGAAAGATGAAAAAGCAATTGAAATATAAGAACGGTA  
ACCCTCATACGCCAGTTCCGCCGAGATTCAACGAACGAGTGAGTCCAGCGCCTATAAG  
GACGGGGGAGACGATCGTCCTTTCTGCATCTCGCAGGGGATCCCGCCACCCATGTATC  
TATGGTTTCGCGAGTCCGTGACGGGGACTGCGATGATCTTCAATTCGGAGAGGATCTAC  
GCGAGAGCAGGGGTCCTCGTGTTGCAGTCCGCGAGGGGCGGAGGACGCGGGGCGATAC  
GTGTGCCACGCCAACAATACGGCCGGTTCCGAGATGGTCTGAATTGGAAGTCTCCATTAT  
AAGCAGCCTCTCCATCCACCTGGTGCCTCAACAG

>novel\_circ\_000356

ATGACAGACATCACATGCTGCCGACTGGGGAACTCCTCGTGTTCTCGGTGACCTCCTC  
CGACGCCCAGTCCAGTTATCGTTGCAGGACCGTGCACCGCGTCACCGGCGACACCGTG  
GAAAGTTCCTCGTACGCGAGGCTCGTGGTCAACGGCGGTTTACGTACGTATGTGACGA  
GCAATTACGCGTCAATATTTAAATCGAAACGATATTAATGTTTACGGACGCGTTGAAATC  
GTAACGATGTCCCGAACTCGCGGAGGACTCGATGAGTTTAAATTTTCTTCCGGGATAA  
ACGTATCCCGGATTAATAATAAAGATTTCGTACGTGCGATTGTCACGGCGTGTAATTAACG  
CGATAAAGTAATGGGGGAAAAATGTAGAATGTAAACGGAAGGGGAGAGCGGGAATAA  
ATGTAAATTTGTTCGAGAGCGTAGCGGTTTCAATAATACGTAACAGCGACAAAAGGAAG  
GTCTTTCACGGTTGTGAAAAATTGATACCTTGAGATCTTTGCGACCCGTTTCAACGAAA  
TCTCCGCGGAGATTCTTTCCGAGATATTCGAAATGCATTTTCGAGGTATCAAGGGGGA  
AGAGGATCGTGAAAAAATTTATGAAAGATGAAAAAGCAATTGAAATATAAGAACGGTA  
ACCCTCATACGCCAGTTCCGCCGAGATTCAACGAACGAGTGAGTCCAGCGCCTATAAG  
GACGGGGGAGACGATCGTCCTTTCTGCATCTCGCAGGGGATCCCGCCACCCATGTATC  
TATGGTTTCGCGAGTCCGTGACGGGGACTGCGATGATCTTCAATTCGGAGAGGATCTAC  
GCGAGAGCAGGGGTCCTCGTGTTGCAGTCCGCGAGGGGCGGAGGACGCGGGGCGATAC  
GTGTGCCACGCCAACAATACGGCCGGTTCCGAGATGGTCTGAATTGGAAGTCTCCATTAT  
AAGCAGCCTCTCCATCCACCTGGTGCCTCAACAGGTGACCGTCGACCTGGGCAAGGA



CGCGGAATTCCAATGCTCGGTACCGGCCAGCCAATCCCCGTCATATTCTGGACCAAG  
GACGGGCTTCCCGTGGGAGAGAGCGCCTCTGGTAGAAGCAAGATCACAGGCAACGAC  
GGATCCACGCTGCGCATTTCCCTCGGTCTGTAGGGACGACAAGGGGATGTACCAATGCT  
TCGCGAAGAACGACTACGAGATGGTCCAAGCGACCGCCGAGTTGCGTCTGGGGG

>novel\_circ\_000357

ATGACAGACATCACATGCTGCCGACTGGGGAACTCCTCGTGTTCTCGGTGACCTCCTC  
CGACGCCCAGTCCAGTTATCGTTGCAGGACCGTGCACCGCGTCACCGGCGACACCGTG  
GAAAGTTCCTCGTACGCGAGGCTCGTGGTCACCGGCGGTTTACGTACGTATGTGACGA  
GCAATTACGCGTCAATATTTAAATCGAAACGATATTAATGTTTACGGACGCGTTGAAATC  
GTAACGATGTCCCGAACTCGCGGAGGACTCGATGAGTTTTAAATTTTCTTCCGGGATAA  
ACGTATCCCGGATTAATAATAAAGATTCTGTACGTGCGATTGTCACGGCGTGTAATTAACG  
CGATAAAGTAATGGGGGAAAAATGTAGAATGTAAACGGAAGGGGAGAGCGGGAATAA  
ATGTAAATTTGTCGAGAGCGTAGCGGTTCAATAATACGTAACAGCGACAAAAGGAAG  
GTCTTTCACGGTTGTGAAAAATTGATACCTTGAGATCTTTGCGACCCGTTTCAACGAAA  
TCTCCGCGGAGATTTCTTTCCGAGATATTCGAAATGCATTTTCGAGGTATCAAGGGGGA  
AGAGGATCGTGAAAAATTTATGAAAGATGAAAAAGCAATTGAAATATAAGAACGGTA  
ACCCTCATACGCCAGTTCCGCCGAGATTCAACGAACGAGTGAGTCCAGCGCCTATAAG  
GACGGGGGAGACGATCGTCCTTTCCTGCATCTCGCAGGGGATCCCGCCACCCATGTATC  
TATGGTTTCGCGAGTCCGTGACGGGGACTGCGATGATCTTCAATTCGGAGAGGATCTAC  
GCGAGAGCAGGGGTCCTCGTGTTGCAGTCGGCGAGGGCGGAGGACGCGGGGCGATAC  
GTGTGCCACGCCAACAATACGGCCGGTTCCGAGATGGTCGAATTGGAAGTCTCCATTAT  
AAGCAGCCTCTCCATCCACCTGGTGCCTCAACAGGTGACCGTCGACCTGGGCAAGGA  
CGCGGAATTCCAATGCTCGGTACCGGCCAGCCAATCCCCGTCATATTCTGGACCAAG  
GACGGGCTTCCCGTGGGAGAGAGCGCCTCTGGTAGAAGCAAGATCACAGGCAACGAC  
GGATCCACGCTGCGCATTTCCCTCGGTCTGTAGGGACGACAAGGGGATGTACCAATGCT  
TCGCGAAGAACGACTACGAGATGGTCCAAGCGACCGCCGAGTTGCGTCTGGGGGACG  
CGGCGCCGACGCTTCTGTACAAATTCATCGAGCAGACCATCCAGCCCGGCCCTTCGGT  
GTCGCTCAAGTGCATCGCCACCGGGAACCCGACGCCGCACTTCTCCTGGACCCTGGAC  
GGTTTCCCTCTTCCGCAGAACGACAG

>novel\_circ\_000358

ACCCTCATACGCCAGTTCCGCCGAGATTCAACGAACGAGTGAGTCCAGCGCCTATAAG  
GACGGGGGAGACGATCGTCCTTTCCTGCATCTCGCAGGGGATCCCGCCACCCATGTATC  
TATGGTTTCGCGAGTCCGTGACGGGGACTGCGATGATCTTCAATTCGGAGAGGATCTAC  
GCGAGAGCAGGGGTCCTCGTGTTGCAGTCGGCGAGGGCGGAGGACGCGGGGCGATAC  
GTGTGCCACGCCAACAATACGGCCGGTTCCGAGATGGTCGAATTGGAAGTCTCCATTAT  
AAGCAGCCTCTCCATCCACCTGGTGCCTCAACAGGTGACCGTCGACCTGGGCAAGGA  
CGCGGAATTCCAATGCTCGGTACCGGCCAGCCAATCCCCGTCATATTCTGGACCAAG  
GACGGGCTTCCCGTGGGAGAGAGCGCCTCTGGTAGAAGCAAGATCACAGGCAACGAC  
GGATCCACGCTGCGCATTTCCCTCGGTCTGTAGGGACGACAAGGGGATGTACCAATGCT  
TCGCGAAGAACGACTACGAGATGGTCCAAGCGACCGCCGAGTTGCGTCTGGGGGACG

>novel\_circ\_000359

ACCCTCATACGCCAGTTCCGCCGAGATTCAACGAACGAGTGAGTCCAGCGCCTATAAG  
GACGGGGGAGACGATCGTCCTTTCCTGCATCTCGCAGGGGATCCCGCCACCCATGTATC  
TATGGTTTCGCGAGTCCGTGACGGGGACTGCGATGATCTTCAATTCGGAGAGGATCTAC  
GCGAGAGCAGGGGTCCTCGTGTTGCAGTCGGCGAGGGCGGAGGACGCGGGGCGATAC  
GTGTGCCACGCCAACAATACGGCCGGTTCCGAGATGGTCGAATTGGAAGTCTCCATTAT  
AAGCAGCCTCTCCATCCACCTGGTGCCTCAACAGGTGACCGTCGACCTGGGCAAGGA  
CGCGGAATTCCAATGCTCGGTCAACGGCCAGCCAATCCCGTCATATTCTGGACCAAG  
GACGGGCTTCCCGTGAGAGAGAGCGCCTCTGGTAGAAGCAAGATCACAGGCAACGAC  
GGATCCACGCTGCGCATTTCCTCGGTCTGAGGGACGACAAGGGGATGTACCAATGCT  
TCGCGAAGAACGACTACGAGATGGTCCAAGCGACCGCCGAGTTGCGTCTGGGGGACG  
CGGCGCCGACGCTTCTGTACAAATTCATCGAGCAGACCATCCAGCCCGGCCCTTCGGT  
GTCGCTCAAGTGCATCGCCACCGGGAACCCGACGCCGCACTTCTCCTGGACCCTGGAC  
GGTTTCCCTCTTCCGCAGAACGACAGGTTTATGATTGGGCAGTATGTGACGGTGCACG  
GGGACGTGATATCGCACGTGAACATCAGCGTGGTTCACGTGGAGGACGGAGGGGAGT  
ACCGGTGCACAGCGGCGAACC GGATGGCGAAGGTACACCATTCGGCTCGTCTCAACAT  
TTACGGCCTGCCCCACGTACGCCCGATGGGGAACTACGCCGCTGTGGCCGGCGAGACC  
ACCGTCATCAAATGTCCGGTCGCTGGTTTCCCAATAGCGAGCATCACTTGGGAGAAAG  
ACGGGAAGGTGTTACCGACGAGTCGACGTCAGGAAGTGTTCCCGAACGGTACGCTGG  
TGCTGCATCACGTCGACAGAAGCACCGATCACGGCGCATAACGTCACGGCGAAGA  
ACAAACAAGGTCGCTCCGACTCTCAGACGGTCCACATCGAAGTGAAAG

>novel\_circ\_000360

GTGACCGTCGACCTGGGCAAGGACGCGGAATTCCAATGCTCGGTCAACGGCCAGCCA  
ATCCCGTCATATTCTGGACCAAGGACGGGCTTCCCGTGAGAGAGCGCCTCTGGTA  
GAAGCAAGATCACAGGCAACGACGGATCCACGCTGCGCATTTCCTCGGTCTGAGGG  
ACGACAAGGGGATGTACCAATGCTTCGCGAAGAACGACTACGAGATGGTCCAAGCGA  
CCGCCGAGTTGCGTCTGGGGGACGCGGCGCCGACGCTTCTGTACAAATTCATCGAGCA  
GACCATCCAGCCCGGCCCTTCGGTGTGCTCAAGTGCATCGCCACCGGGAACCCGACG  
CCGCACTTCTCCTGGACCCTGGACGGTTTCCCTCTTCCGCAGAACGACAGGTTTATGAT  
TGGGCAGTATGTGACGGTGCACGGGGACGTGATATCGCACGTGAACATCAGCGTGGTT  
CACGTGGAGGACGGAGGGGAGTACCGGTGCACAGCGGCGAACC GGATGGCGAAGGT  
ACACCATTCGGCTCGTCTCAACATTTACGGCCTGCCCCACGTACGCCCGATGGGGAACT  
ACGCCGCTGTGGCCGGCGAGACCACCGTCATCAAATGTCCGGTCGCTGGTTTCCCAAT  
AGCGAGCATCACTTGGGAGAAAGACGGGAAGGTGTTACCGACGAGTCGACGTCAGGA  
AGTGTTCCCGAACGGTACGCTGGTGTGATCACGTCGACAGAAGCACCGATCACGGC  
GCATACACGTGCACGGCGAAGAACAACAAGGTCGCTCCGACTCTCAGACGGTCCAC  
ATCGAAGTGAAAG

>novel\_circ\_000361

ACGCGGCGCCGACGCTTCTGTACAAATTCATCGAGCAGACCATCCAGCCCGGCCCTTC  
GGTGTGCTCAAGTGCATCGCCACCGGGAACCCGACGCCGCACTTCTCCTGGACCCTG  
GACGGTTTCCCTCTTCCGCAGAACGACAGGTTTATGATTGGGCAGTATGTGACGGTGC  
ACGGGGACGTGATATCGCACGTGAACATCAGCGTGGTTCACGTGGAGGACGGAGGGG  
AGTACCGGTGCACAGCGGCGAACC GGATGGCGAAGGTACACCATTCGGCTCGTCTCA

ACATTTACGGCCTGCCCCACGTACGCCCCGATGGGGAACTACGCCGCTGTGGCCGGCGA  
GACCACCGTCATCAAATGTCCGGTCGCTGGTTTCCCAATAGCGAGCATCACTTGGGAG  
AAAGACGGGAAGGTGTTACCGACGAGTCGACGTCAGGAAGTGTTCCCGAACGGTACG  
CTGGTGCTGCATCACGTTCGACAGAAGCACCGATCACGGCGCATAACAGTGCACGGCGA  
AGAACAAACAAGGTCGCTCCGACTCTCAGACGGTCCACATCGAAGTGAAAG

>novel\_circ\_000362

GTTTATGATTGGGCAGTATGTGACGGTGACAGGGGACGTGATATCGCACGTGAACATCA  
GCGTGGTTCACGTGGAGGACGGAGGGGAGTACCGGTGCACAGCGGCGAACCGGATGG  
CGAAGGTACACCATTCGGCTCGTCTCAACATTTACGGCCTGCCCCACGTACGCCCCGATG  
GGGAACTACGCCGCTGTGGCCGGCGAGACCACCGTCATCAAATGTCCGGTCGCTGGTT  
TCCCAATAGCGAGCATCACTTGGGAGAAAGACGGGAAGGTGTTACCGACGAGTCGAC  
GTCAGGAAGTGTTCCCGAACGGTACGCTGGTGCTGCATCACGTTCGACAGAAGCACCG  
ATCACGGCGCATAACAGTGCACGGCGAAGAACAACAAGGTCGCTCCGACTCTCAGA  
CGGTCCACATCGAAGTGAAAG

>novel\_circ\_000363

GTTTATGATTGGGCAGTATGTGACGGTGACAGGGGACGTGATATCGCACGTGAACATCA  
GCGTGGTTCACGTGGAGGACGGAGGGGAGTACCGGTGCACAGCGGCGAACCGGATGG  
CGAAGGTACACCATTCGGCTCGTCTCAACATTTACGGCCTGCCCCACGTACGCCCCGATG  
GGGAACTACGCCGCTGTGGCCGGCGAGACCACCGTCATCAAATGTCCGGTCGCTGGTT  
TCCCAATAGCGAGCATCACTTGGGAGAAAGACGGGAAGGTGTTACCGACGAGTCGAC  
GTCAGGAAGTGTTCCCGAACGGTACGCTGGTGCTGCATCACGTTCGACAGAAGCACCG  
ATCACGGCGCATAACAGTGCACGGCGAAGAACAACAAGGTCGCTCCGACTCTCAGA  
CGGTCCACATCGAAGTGAAAGTACCGCCTAAAATCGATCCGTTTAGCTTTCCTGCCAAT  
ATACAAGAAGGCGCGCGGGTGACGTGGTGTCGTTGGTCAGCGAGGGGCGATTACCG  
TTGAAGATCACCTGGCTGAAGGATGGCAGGCCATTGAATTCCACGGAGACGACCACCC  
ATCATATCGGCGAATACGATCTCACGTTGATGATACAGAGCGCGACCACGGCCCATAAT  
GGCAACTATACGTGCGTGCGGAGCAACGATGCCGCCGAAACGTCTCGCACGGCATCCC  
TGTTGGTCCACG

>novel\_circ\_000364

ATTAAAAATCGAATCGGCGGAAGGGGTGTACGGTTTGACCGAGGGGCGTGGTGAAAA  
GGAAAGACGCTCCTAGCTAAAAAGGAAGAGAGAAGTTTCTCGAAGGTTTGCTTCGTT  
TGCCGCTTCTGCTCTGGATCCGCTCGAAAAGGAGAAGCACGGCGGAGTTCTCGTTTCGC  
GACAAGGCGAGAAAGAAACCGATTTCGGGCGCGTCATCTTCGAGAAAGAGAGACGGA  
CACGCGTTAACCTGGAACAGATTTAGAAGGCGTGCATCGAGTAAAACCTCTAAAGGGAA  
GATCGAGTGGAGGGAAGAGGATCAAAGAGAAACAGGGAAAGGAAGAAGAAGAAGA  
AGAAGAAGAAAAAAAAAAGGGGCGAGCTATTGTCTGAAGCGAGGGATAAAAAACAAGG  
TGTTCAACGACGGAGCTAGGAAATATAAAGGACGGGACGATAATAGAGAGGAAGAGA  
AGACACGAGTGATACCATTTGGTGACGAAGATGACTAAGAGCAAACCGTTGACCGCGC  
CTGAACGAAGAACCAACGACGTGTTTGACGAAGAATCGATCGCGGTTTCGATCGAGAT  
GGAGAAACCTCGCCGCCTTCTGGATACTCGGCCTCTGCAACAACCTACGGATACGTGGT  
GATGCTTAGCGCGGCGCACGATATCCTCGAGAGCAAGTTTGGAACCACG

>novel\_circ\_000365

CCCTCTTTCTCTTTTCAAATGGTTCACAGCTTTGCGTAGTGGTGTAAGATTCAGAACG  
TTTTTCGGGATTATTATATATGTTAGTTATTGGTCTTTGTTTTGAGTAAATGAGACCCCC  
CCCCCTCAAAGAGGGGGCTTTAAAGGGTATTTTGGTAGGATGCAGTCAGGTCTCGAAA  
ATTACTTTTCTTCAAATGACTCGAGTAGCGAAAAATTATTAAAATTTGTAAACAAAAG  
AAATGTTTT

>novel\_circ\_000366

AAAAAAAAAAAAAGAAGACTGATGATACTTATGTGACACGATCCATTTTTTCGGATTTA  
AATGAGAAGAAAAGTCGTCCTTTGAATATTACAAGATATTTGGCATCGTTTGTTAAACG  
GAACAGAAAATCCTTTTCGTGAATTAAAAAGAAAAAAA

>novel\_circ\_000367

AGAAAAAAAAAAAAAGAAGACTGATGATACTTATGTGACACGATCCATTTTTTCGGAT  
TTAAATGAGAAGAAAAGTCGTCCTTTGAATATTACAAGATATTTGGCATCGTTTGTTAA  
ACGGAACAGAAAATCCTTTTCGTGAATTAAAAAGAAAAAAA

>novel\_circ\_000368

CGCGAGGACGGGAGGCGTGGCAAGATCAACGCCGTCTATAATCTGGTTGTCGTTGCTA  
CTGACACTGGGAACGAGGACAACGGCGTCAGGGACGAACATGACAAACGTGTCACC  
GCTCGCCTCGACGGTGAGGCCGATCACGACCACGGAAGTAGTTTATCAGAGATTCGCG  
ATCGAGCCGATGGATCAGACGGCGGTGATTGGCAGCCGGGTGACGCTTCCTTGCCGGG  
TCCTCGATCAGAAGGGACCTATTCAATGGACGAAGGACGACTTCGGGCTTGCGCTGT  
TAGAAACCTCACGGGATACGAGCGTTACGCCATGATCGGCAGCGACGAGGAGG

>novel\_circ\_000369

ATCACGTGGATCGACGGGTTGGGGAACGTGCTGCACAGAGGCATAAAAACGACCAAG  
GAATTGTTTCGACGACGGCCCCCTTGACACCGTGAAATCCGTGCTGAGGGTGATGCCGC  
GCAAGGACCACGACAACACGACGTTCACGTGCCAAAGTCAGAACCGGGCCGACCGC  
ACGCCGCAGAACGCGAACTGCGCGTCGAGGTCCGCTACGCGCCAAAAGTGTCTCTG  
AGGATCCGGTCGGGGTTGGGCAAGAATGGGCGCATCGTGGAGGGCAGCGAGCTCCGC  
TTCAAGTGTCGCGCGGAAGCGAACCCGCCGAACGTCGAGTACAG

>novel\_circ\_000372

CTGGAGCCGCTTCTGAGGAACTAACCAAAGGTCCAGTTCTGCACACAATCGCCACTC  
TCTCACGAAGGAGCAAACGATGCACTGGTTTCGCCCAAATCGGAGGTGACGAGGCCTC  
TCCCATTCTGTCAGATGTGAAGCGCCGGCAGAGTCTCTACGACGAGGACTCCCTCGAT  
GGCGATCATCCTAGCGAGAACGAAGGACGGGAGTCGACGGGAAACGCGAAAGACGT  
GGACAGGGCGAAGCTCGTCCGTGAGAGACAGAACGAAGAACGGCAGCGGAAGTTGG  
AAGAGCTGAGACAGCAGGCGTTCGCCGCGCAACGTTTCCGGGAGCAACGGGAAGAG  
GAACGTCGAAGACGCATCGACGAGCTCAGATCGCGTGACAATGACAGACGAAACCAA  
GTGGAGGAGAGGAAACGGTTGATATGCGAGGCGGAAAGGGAACGAAGGGAGGCGAT  
CCTCCGGAAGAACCAAGAGAGAGAGGCGCGTATCGAGGCGAAGAAGAAGAACGAGA

GGTCGCACATCGTGTTCGCTTTCGGAAGCTCGACACCGAGGATGCTGGAGCCGGCCGA  
CACCGGCGGCTCCACTTTCTGGGGTACCCGTCGAGCAACGTCCACCACCAATGTCATG  
ATGTTCTCCGCCGCTCAACCGTTGACCAGGAGGTCTTCCGAAAGAGAGCTCGATGGAA  
GCAAGAAACGAGCCACGTCCGCTGGTGGGCTCGATCGGAAACCTGGCGAAG

>novel\_circ\_000373

ATGTGAAGCGCCGGCAGAGTCTCTACGACGAGGACTCCCTCGATGGCGATCATCCTAG  
CGAGAACGAAGGACGGGAGTCGACGGGAAACGCGAAAGACGTGGACAGGGCGAAG  
CTCGTCCGTGAGAGACAGAACGAAGAACGGCAGCGGAAGTTGGAAGAGCTGAGACA  
GCAGGCGTTCGCCGCGCAACGTTTCCGGGAGCAACGGGAAGAGGAACGTCTGAAGAC  
GCATCGACGAGCTCAGATCGCGTGACAATGACAGACGAAACCAAGTGGAGGAGAGGA  
AACGGTTGATATGCGAGGCGGAAAGGGAACGAAGGGAGGCGATCCTCCGGAAGAACC  
AAGAGAGAGAGGGCGCGTATCGAGGGCGAAGAAGAAGAACGAGAGGTTCGCACATCGTG  
TTCGCTTTCGGAAGCTCGACACCGAGGATGCTGGAGCCGGCCGACACCGGCGGCTCC  
ACTTTCTGGGGTACCCGTCGAGCAACGTCCACCACCAATGTCATGATGTTCTCCGCCG  
TCAACCGTTGACCAGGAGGTCTTCCGAAAGAGAGCTCGATGGAAGCAAGAAACGAGC  
CACGTCCGCTGGTGGGCTCGATCGGAAACCTGGCGAAGCGTTGAATGGTTTGTGTTGCA  
GATATGAGAATGTCTCGTCCATGTACGAGGTGTTCAATTGGAATTCTAGCCCTGATCCT  
CCCTTAACCCCCGCCAAACATAAGAGAGCCAGCCTCTCTCTGCCTCCTACAACCTGACAT  
CTTTGCCATCGATGATAAGTCTGATAGCGACACTAGGCGTCCGATGATTCAGCGGGCTG  
CCAGTGGTGAAGAAAGCGACGGAACGCCGGGAACCCCTAGCTCGGTTTATCTGCGGG  
TGAACAGGAGGCGCACCGATCTGATGCCAACGATACCGTCGCCACGTGACGGACCGC  
CGACATCCGGGCGTAGCTCGAGCGCGAAGGCCTTCACACGTTTCGCCAGGTAGGACTTA  
CTCCATGTCCAGGCTGGACCAACTGGCGCAGCCTAGGAAACGTCCGACAGAACTTAG  
CACATTGACGGAACAGCAAAGCCAGCCTCTGAGCGCTTCTAGCATGAGTCGCAGCATG  
TCACATTTAGCTGCGTCCGGGGGCAAGAGCCTGAAACGCTCAGATAACTCTCGTAGCA  
TGGGTACATTGCCAGGCGCGGTTCCGATGCCGAGACCAACGAGGGCCGAGAGACTCC  
GTCGCAAAGCCCGCGAGCATCAGAACCAACAGCAACAAG

>novel\_circ\_000374

GACGGGAGTCGACGGGAAACGCGAAAGACGTGGACAGGGCGAAGCTCGTCCGTGAG  
AGACAGAACGAAGAACGGCAGCGGAAGTTGGAAGAGCTGAGACAGCAGGCGTTTCGC  
CGCGCAACGTTTCCGGGAGCAACGGGAAGAGGAACGTCTGAAGACGCATCGACGAGC  
TCAGATCGCGTGACAATGACAGACGAAACCAAGTGGAGGAGAGGAAACGGTTGATAT  
GCGAGGCGGAAAGGGAACGAAGGGAGGCGATCCTCCGGAAGAACCAAGAGAGAGA  
GGCGCGTATCGAGGCGAAGAAGAAGAACGAGAGGTCGCACATCGTGTTTCGCTTTCGG  
AAGCTCGACACCGAGGATGCTGGAGCCGGCCGACACCGGCGGCTCCACTTTCTGGGG  
TACCCGTCGAGCAACGTCCACCACCAATGTCATGATGTTCTCCGCCGCTCAACCGTTGA  
CCAGGAGGTCTTCCGAAAGAGAGCTCGATGGAAGCAAGAAACGAGCCACGTCCGCTG  
GTGGGCTCGATCGGAAACCTGGCGAAG

>novel\_circ\_000375

ATATGAGAATGTCTCGTCCATGTACGAGGTGTTCAATTGGAATTCTAGCCCTGATCCTC  
CCTTAACCCCCGCCAAACATAAGAGAGCCAGCCTCTCTCTGCCTCCTACAACCTGACATC

TTTGCCATCGATGATAAGTCTGATAGCGACACTAGGCGTCCGATGATTTCAGCGGGCTGC  
CAGTGGTGAAGAAAGCGACGGAACGCCGGGAACCCCTAGCTCGGTTTATCTGCGGGT  
GAACAGGAGGCGCACCGATCTGATGCCAACGATACCGTCGCCACGTGACGGACCGCC  
GACATCCGGGCGTAGCTCGAGCGCGAAGGCCTTCACACGTTCCGCCAGGTAGGACTTAC  
TCCATGTCCAGGCTGGACCAACTGGCGCAGCCTAGGAAACGTCCGACAGAACTTAGC  
ACATTGACGGAACAGCAAAGCCAGCCTCTGAGCGCTTCTAGCATGAGTCGCAGCATGT  
CACATTTAGCTGCGTCCGGGGGCAAGAGCCTGAAACGCTCAGATAACTCTCGTAGCAT  
GGGTACATTGCCAGGCGCGGTTCCGATGCCGAGACCAACGAGGGCCGAGAGACTCCG  
TCGCAAAGCCCCGCGAGCATCAGAACCAACAGCAACAAGGCATCCGCAGCGGGGAGGT  
GACACCGAACAGCCCATCACGACCGCACAGCTCCATGAGTCAGCAAAGCGCCAGCAG  
TGTGGGCAGCAGTAACGTCAATCTGCGTCCCCGTACAGCTGCCCCGCGTCGACCGCGA  
CCTGCTTCTATTGCCGGTACCGGTGTTTCGGTCACAGAACGACACAATCTAGTGAGCG  
AGACAAAGTCGCCGAAAGATTGCAAGCCGCCACTGCCAAAGGTCCATAGCACTCCAA  
AGAAAACGTCTGCACCGAAATCGGCGGAGATGAAGAAGCCGGCCGAGAAGCTGGTG  
AAGAACGCGAAGGCTTCGCCTCGGATAACCCCGAAAGTGACACCGTTGCAGAGTCCT  
GGCGCCGAGAACGCTCCATTGATCCGCGGTAGTACCGGGGAGATAATAAAAAGCGAGG  
GGAAGGAGGATAAATTGGAGGATAAGCACGAGGAGAAGAAAGATCAAGGCAGCGAG  
AAAACGCAGCACGAGATAAGCGCCGCGGAACAGGGTAACGACGAGGTGAAGAAGCC  
GGCCGTTATAGAGCAATCCAATATCGTGTCCAAGCAGGCGAAGGACGAGACTAATTTG  
AATCAGGAGAATCAATCGGCTGTGCGATCTCAAGAAACGCCGAAAGCTGCCAAGAAG  
GAAGCCGAGGCCAAGTCCGAGAGCAACGTGGAGGAACAGGTGATATGTCTGCATCG  
ATGATAGCGAAGATCCGGATCACTACGGAAGAGGAAGCTAAGGCAGCTATAGCCGAAC  
GTAGAAGATTAGCTAGAGAGCAGGCTGAACGGGAAGCCGAACTTGAACGCCAACGAC  
AGGAGGAGGAAGCCCGTTTAGAGGCCGAGAGATTGCGCGCCGAAGAGGAGGAACAG  
CGGCGTTTGGAGGAGGAAACGCTTCGTTTGGCTAACGAAGCTCGAGAAGCTGAGGAA  
CAGAGACTGAGACTGGCGATAGAGGAAGCGAAACGTGCGGAGGAAGAGGACAGGAG  
AAGAAGGGAAGAGGAGGCTCGTCAGAAACAGGAGAAAGAGGAGGCTGAACGGAAA  
GCAAGGGAAGAAGCGGAAGACAACGGATCGAAATGGCAGAACGCGTTAAGAGAGA  
AGAGGAAGAGAGACTCGCTAGACGTAAACGCGTCGAGGCAATTATGCTTAGAACCCG  
TGAAAAAATCAGAGTAACACACCTACGAAGGGTGAAGGTGGTGATGGCGATAAATT  
GAAAGAAGACAGTCCTAACGATGAAAATAAAACAGCACCAAGTTAATAAAAGCGAGGA  
TGTTATGACAGCCAGTCTGATATCCGAGGCGACTCAACAATTCATTAGCGGAGAGCAG  
CGTGCTCATCATACGGAAAACAATACTACTACGGACATTGTGCATAACGGCACGCATAG  
TAATGGCATTAAATGAAAATAAAATTGTATTGGATAATAATCAGGGTAATGTGGAAGGAG  
AACTGAATGGTCATCATACAAATCATGGAAACGGTATCAACAGTCAATCAATTACACTG  
GATAATGCCACTGT

>novel\_circ\_000376

GTGAAGAAAGCGACGGAACGCCGGGAACCCCTAGCTCGGTTTATCTGCGGGTGAACA  
GGAGGCGCACCGATCTGATGCCAACGATACCGTCGCCACGTGACGGACCGCCGACATC  
CGGGCGTAGCTCGAGCGCGAAGGCCTTCACACGTTCCGCCAGGTAGGACTTACTCCATG  
TCCAGGCTGGACCAACTGGCGCAGCCTAGGAAACGTCCGACAGAACTTAGCACATTG  
ACGGAACAGCAAAGCCAGCCTCTGAGCGCTTCTAGCATGAGTCGCAGCATGTACATT  
TAGCTGCGTCCGGGGGCAAGAGCCTGAAACGCTCAGATAACTCTCGTAGCATGGGTAC

ATTGCCAGGCGCGGTTCCGATGCCGAGACCAACGAGGGCCGAGAGACTCCGTGCGCAA  
AGCCCGCGAGCATCAGAACCAACAGCAACAAGGCATCCGCAGCGGGGAGGTGACAC  
CGAACAGCCCATCACGACCGCACAGCTCCATGAGTCAGCAAAGCGCCAGCAGTGTGG  
GCAGCAGTAACGTCAATCTGCGTCCCCGTACAGCTGCCCCGCGTCGACCGCGACCTGC  
TTCTATTGCCGGTACCGGTGTTTCGGTCACAGAACGACACAATCTAGTGAGCGAGACA  
AAGTCGCCGAAAGATTCGAAGCCGCCACTGCCAAAGGTCCATAGCACTCCAAAGAAA  
ACGTCTGCACCGAAATCGGCGGAGATGAAGAAGCCGGCCGAGAAGCTGGTGAAGAA  
CGCGAAGGCTTCGCCTCGGATAACCCCGAAAGTGACACCGTTGCAGAGTCCTGGCGC  
CGAGAACGCTCCATTGATCCGCGGTAGTACCGGGGAGATAATAAAAAGCGAGGGGAA  
GGAGGATAAATTGGAGGATAAGCACGAGGAGAAGAAAGATCAAGGCAGCGAGAAAA  
CGCAGCACGAGATAAGCGCCGCGGAACAGGGTAACGACGAGGTGAAGAAGCCGGCC  
GTTATAGAGCAATCCAATATCGTGTCCAAGCAGGCGAAGGACGAGACTAATTTGAATC  
AGGAGAATCAATCGGCTGTGCGATCTCAAGAAACGCCGAAAGCTGCCAAGAAGGAAG  
CCGAGGCCAAGTCCGAGAGCAACGTGGAGGAACAGGTCGATATGTCTGCATCGATGAT  
AGCGAAGATCCGGATCACTACGGAAGAGGAAGCTAAGGCAGCTATAGCCGAACGTAG  
AAGATTAGCTAGAGAGCAGGCTGAACGGGAAGCCGAACCTTGAACGCCAACGACAGG  
AGGAGGAAGCCCGTTTAGAGGGCCGAGAGATTGCGCGCCGAAGAGGAGGAACAGCGG  
CGTTTGGAGGAGGAAACGCTTCGTTTGGCTAACGAAGCTCGAGAAGCTGAGGAACAG  
AGACTGAGACTGGCGATAGAGGAAGCGAAACGTCGCGAGGAAGAGGACAGGAGAAG  
AAGGGAAGAGGAGGCTCGTCAGAAACAGGAGAAAGAGGAGGCTGAACGGAAAGCA  
AGGGAAGAAGCGGAAAGACAACGGATCGAAATGGCAGAACGCGTTAAGAGAGAAGA  
GGAAGAGAGACTCGCTAGACGTAAACGCGTCGAGGCAATTATGCTTAGAACCCGTGG  
AAAAAATCAGAGTAACACACCTACGAAGGGTGAAGGTGGTGATGGCGATAAATTGAA  
AGAAGACAGTCCTAACGATGAAAATAAAACAGCACCAAGTTAATAAAAGCGAGGATGTT  
ATGACAGCCAGTCTGATATCCGAGGCGACTCAACAATTCATTAGCGGAGAGCAGCGTG  
CTCATCATACGGAAAACAATACTACTACGGACATTGTGCATAACGGCACGCATAGTAAT  
GGCATTAAATGAAAATAAAATTGTATTGGATAATAATCAGGGTAATGTGGAAGGAGAACT  
GAATGGTCATCATACAAATCATGGAAACGGTATCAACAGTCAATCAATTACACTGGATA  
ATGCCACTGT

>novel\_circ\_000377

GCATCCGCAGCGGGGAGGTGACACCGAACAGCCCATCACGACCGCACAGCTCCATGA  
GTCAGCAAAGCGCCAGCAGTGTGGGCAGCAGTAACGTCAATCTGCGTCCCCGTACAG  
CTGCCCCGCGTCGACCGCGACCTGCTTCTATTGCCGGTACCGGTGTTTCGGTCACAGA  
ACGACACAATCTAGTGAGCGAGACAAAGTCGCCGAAAGATTCGAAGCCGCCACTGCC  
AAAGGTCCATAGCACTCCAAAGAAAACGTCTGCACCGAAATCGGCGGAGATGAAGAA  
GCCGGCCGAGAAGCTGGTGAAGAACGCGAAGGCTTCGCCTCGGATAACCCCGAAAGT  
GACACCGTTGCAGAGTCCTGGCGCCGAGAACGCTCCATTGATCCGCGGTAGTACCGGG  
GAGATAATAAAAAGCGAGGGGAAGGAGGATAAATTGGAGGATAAGCACGAGGAGAAG  
AAAGATCAAGGCAGCGAGAAAACGCAGCACGAGATAAGCGCCGCGGAACAGGGTAA  
CGACGAGGTGAAGAAGCCGGCGTTATAGAGCAATCCAATATCGTGTCCAAGCAGGCG  
AAGGACGAGACTAATTTGAATCAGGAGAATCAATCGGCTGTGCGATCTCAAGAAACGC  
CGAAAGCTGCCAAGAAGGAAGCCGAGGGCCAAGTCCGAGAGCAACGTGGAGGAACAG  
GTCGATATGTCTGCATCGATGATAGCGAAGATCCGGATCACTACGGAAGAGGAAGCTA

AGGCAGCTATAGCCGAACGTAGAAGATTAGCTAGAGAGCAGGCTGAACGGGAAGCCG  
AACTTGAACGCCAACGACAGGAGGAGGAAGCCCGTTTAGAGGCCGAGAGATTGCGCG  
CCGAAGAGGAGGAACAGCGGCGTTTGGAGGAGGAAACGCTTCGTTTGGCTAACGAAG  
CTCGAGAAGCTGAGGAACAGAGACTGAGACTGGCGATAGAGGAAGCGAAACGTCGC  
GAGGAAGAGGACAGGAGAAGAAGGGAAGAGGAGGCTCGTCAGAAACAGGAGAAAG  
AGGAGGCTGAACGGAAAGCAAGGGAAGAAGCGGAAAGACAACGGATCGAAATGGCA  
GAACGCGTTAAGAGAGAAGAGGAAGAGAGACTCGCTAGACGTAAACGCGTCGAGGC  
AATTATGCTTAGAACCCGTGGAAAAAATCAGAGTAACACACCTACGAAGGGTGAAGGT  
GGTGATGGCGATAAATTGAAAGAAGACAGTCCTAACGATGAAAATAAAACAGCACCA  
GTTAATAAAAGCGAGGATGTTATGACAGCCAGTCTGATATCCGAGGCGACTCAACAATT  
CATTAGCGGAGAGCAGCGTGCTCATCATACGGAAAACAATACTACTACGGACATTGTGC  
ATAACGGCACGCATAGTAATGGCATTAAATGAAAATAAAATTGTATTGGATAATAATCAGG  
GTAATGTGGAAGGAGAACTGAATGGTCATCATACAAATCATGGAAACGGTATCAACAG  
TCAATCAATTACACTGGATAATGCCACTGT

>novel\_circ\_000378

GTAGTGGGCATCGAGCCGTTGCCAAGGTCACGAGGGAGGAGCTGAGGTCATCGCTGC  
ACCTATGTTGTGCGGCGAACTCCTGAACGGTGGCTTCGTGAGTGGTGGAGCGGTACCG  
GTGATTCCCTACGGCCTCTTAGGATTCTGGTTGCCCGGCTGTTTACGCGCTACCAGCCC  
GACCTCTCTCAACTCGTCTTATCTGACCCTGTTGGCCGAACCTTCTGGCCACGGGGCCACC  
AGGATCGTCGAAACGAGCCGATGGACCTCGCGAACAGGAGCCACCAGGCTCCCACGA  
ACGGGGCGCTCGACCTTGACCTCGACCTGCACGCCGACGACATCGACGAGAACGTGT  
TTCTCG

>novel\_circ\_000380

AACCGTACACCGAGTACGAGATATGGGTAAAAGCTTACACGTGGAAGAACGAGGGCG  
AGCCTTCGGAGCACATCATTCGTCGGACAGATATTTTCAGGGCCGAGCGCTCCGTTGATC  
TTGAACGTCACCTTGCCCGACCCACGACTCCGTCTACATCCAATGGGCCAGGCCGAACA  
TCTTCTGGGGCTCGATCGACTACTACTTCATCAATTATAGGATCGAGAATGACAATCGTT  
ACGAAGAGATCGAAGTGATGACGGAGAAGAATCATCTCGAGAGCGCGATGATCATACC  
CAACCTGACGATGAACAGCGTATACGAGATCGTGGTACGCGGAGGCACGCGGAGCGCT  
ATCGACAATCGGCTGATTATACGCGGAGAAGGCTCTGCTCCACAGAAGGTGCGCGGCA  
TTCGCGATTGCAACAGAGCACCACCGTTATTGCCACACACCACCATATGGTTCAGCAG  
CGGAGTGATCGCCGGGATGATCTGCGCTTGTCTCGCGGTGATGCTGATGATCACCTCCT  
TCGTGCTGTGGAA

>novel\_circ\_000381

GTGGTACTACAATAGGAACCAGAGGGAGGAGCCGGTCGAGGATTCGTCCGGGCATTAC  
GTGGTGCGAGACGGTTCGTTGATCATACAAGGCGTCCAGGAGAGCGACGGTGGATCGT  
ACATGTGCACCGCTAGTAATTCAGAGGGCAGCGAGTCTATGGAAGTGAGGTTAACCGT  
GTCTGCGCCATTAAACGTGCACGTCCAACCATCGATCCAGACCGTTGATCTCGGGAAA  
GCCGCTCATTTGACGTGCAGCGCAAGTGGAATTTCCGCAGGCGGCGTTGTACTGGCTGA  
AGGACGGCCAGCCATTGAGAACGGGCGCTCGCATAAGGGCGGTTTCCAGGGAACGTA  
TTTCCGTGATGTCGGTCGCAAGAGAGGATCGCGGCATGTACCAGTGCTTTGTGAGGAA



CGAGTATGAAATGGCTCAAGGAATCGCGGAATTGCGGCTGGGCG

>novel\_circ\_000382

TGGTGAATCAGCGTTACGATCCGGAAGTGCAATGTCCCGGCGGTTTCCTCGGCAACAA  
CGTGCTTATGCGATGCAACGTGCCCAGTTTCGTCCGCGATCACGTCACCATCACATCTT  
GGCTTCAGGAGCCGTCTTCAACATCTACCCCTCCACGATGGGAGATGGGAAATACCA  
CATGCTCTCGAGCGGGGAGCTCATGATATTGAACATCACGCGAGAGGACGCGGAAAGG  
ACTTATCGGTGCAGGACGCATCACCGTTTGACGCAGGAAACGGTCGTCAGCAGCAAC  
GTCGGCAGACTTCAGTTGACCG

>novel\_circ\_000383

ATTATCGTGCTCGTTAATGGCTGCCAGGGTCGTCGGCTAGAGGCCGTTTCAGCGAAGTTT  
TCGAGCCGCCAGCGCGATAACACAGCCCGTACCCGATGAGTGTTAGATCGGCAGGCGG  
ACACATGGTGAAGCAGAGGAGGTTTCATCGGCAATACGAATAACAAGATGATCAACATA  
CGAGAATATTTATAGGTTTTTTTAG

>novel\_circ\_000384

ATTATCGTGCTCGTTAATGGCTGCCAGGGTCGTCGGCTAGAGGCCGTTTCAGCGAAGTTT  
TCGAGCCGCCAGCGCGATAACACAGCCCGTACCCGATGAGTGTTAGATCGGCAGGCGG  
ACACATGGTGAAGCAGAGGAGGTTTCATCGGCAATACGAATAACAAGATGATCAACATA  
CGAGAATATTTATAGGTTTTTTTAGATTTCAGAGAACGACGGGGAGAAAGGATAAAGA  
GAGAGAGAGAGAGAGAGAGAGATATACCGCGTCCATGCTATGGTCAGCCTTTGCAACG  
ACCACGCGACGACCCGATTTCCCGTTTTTTTACGTAATCCTTAGCGAGATGTTTGATTTTC  
ACGCACAGATCCAATTTTCGTGCCGACGTTTCGTGCGAGAGAGGACGAGTTTGAGATTG  
ATTTATCGGCGGAAAAGTGATATAAAATAATCATCGTGGACGGAGGAATAGAGAAAGG  
GAACGGAGTGGAACGGAAACATGATTTCTCCTTAACGCGGCGAAAACCATCGATCAGA  
GATTGATAGATACACATAGGTTGTATCTTCGTTCCACTCGTATCCGCAGCCATATTTCGAG  
TTGGCGTTTCGTTGGAGTACAGGTTTTTCTTAGGTTTACAGGGATTGTTCTAGTATTGGT  
ATCGAAAAGAGATAGAGGATAAGCCAAAGCGAACCAGTGATATTTTTTATGCAGTATTT  
TTCTTCCATTATTACGAGCAAATAAAGCGAGCAAAGAGAGAAAGGAGAAAACGAG  
AGTATTTTGATGAAAAATATAAAATAAGGACGAAAGAATTGATATTTATATATACATACAT  
ATATATATATATATATATATATATATATACATATATTGGACGAATTTATAAACAGAGAGAGAG  
AGAGATTCTTTTCTTTTTTTTAACTTGTTTCTACTCGACTCGAGAGCCGACATCGGCA  
GGTTTTCTTCAAAATG

>novel\_circ\_000385

TTTCGATTTGCAACATGCGGGGAGCTGATGCTGATCTTCGGCGGCCTGATCATGGGAAC  
CCTGACAGGCCTGTGCATCCCCATCTCGACGATACAATACGGCGAGTTCACCACGTTGC  
TGGTGGATCGAAACATGAAGAATCACACGAGCACGCCGACCCTAATAATGAAGTGGTT  
CGGTGGAGGAAAGGTCTTAGGATCTAATTCGACGTACAAGGAGAGGATGGAGGCGCTT  
TACGACGACTCGGTCGCGTTTCGGCGTTTCATCCGCAGCGTTGTCCACGTTCCAATTCGT  
GTTTGCCGTGTTACGGTCGATTTGTTGAACGTAGCTGCATCCAGACAAATCGTTCGGG  
TACGCAAGATGTTCTCCGCTCTGTCTCAGACAGGACATGACGTGGTACGACATCAA  
CACGTCCACCAACTTCGCCAGCAGGATCACCGAGGATTGAGACAAGATGAAGGACGG

CATAGGGGAGAAGCTGGGCGTGTTCACTTATCTGATGGTCTCCTTCATTTCTCCATCAT  
CATATCGTTTCGTCTACGGATGGAAGCTGACCCTGGTCGTGCTGAGTTGCGCGCCGATCA  
TCGTGATCGCGACCGCCGTGGTCGCCAAAGTTTCAGAGCTCCTTGACGGCCCAGGAGTT  
GACCGCTTACGGGCAGGCGGGGAGCGTGCCGAGGAGGTGTTGGGCGCCATCAGGAC  
CGTGATCGCGTTCAACGGCGAGCAGAAGGAGGTGAACAGATACGCGGAGAAGTTGAT  
CCCCGCGGAAAAGACCGGGATCAAGCGCGGTATGTGGTCGGGCGTTGGTGGCGGAGT  
TATGTGGTTCATCATATACATCAGTTACGCCATCGCGTTTTG

>novel\_circ\_000386

GGATTTGGACAAGATGAAGGACGGCATAGGGGAGAAGCTGGGCGTGTTCACTTATCTG  
ATGGTCTCCTTCATTTCTCCATCATCATATCGTTTCGTCTACGGATGGAAGCTGACCCTG  
GTCGTGCTGAGTTGCGCGCCGATCATCGTGATCGCGACCGCCGTGGTCGCCAAAGTTTC  
AGAGCTCCTTGACGGCCCAGGAGTTGACCGCTTACGGGCAGGCGGGGAGCGTGCCG  
AGGAGGTGTTGGGCGCCATCAGGACCGTGATCGCGTTCAACGGCGAGCAGAAGGAGG  
TGAACAGATACGCGGAGAAGTTGATCCCCGCGGAAAAGACCGGGATCAAGCGCGGTA  
TGTGGTCGGGCGTTGGTGGCGGAGTTATGTGGTTCATCATATACATCAGTTACGCCATC  
GCGTTTTTGGTACGGCGTCCAATTGATATTGGAGGACAGGCCGAAGGAGGTGAAGGAGT  
ACACGCCCCGCGGTGCTGGTGATCGTGTTCTTCGGCGTGTTGGCAGGCGCCCAGAACAT  
GGGCCTCACGTCCCCCATCTGGAGGCGTTTCGCCGTGGCGCGGGGCTCGGCCGCGGC  
CATTTTCCAGGTGCTCGATCGCGTGCCACGATCGACAGTTTGAGCAAGGAGGGGCGAG  
AAGCTTCTGCCGTGAACGGCGAGATCGAGTTCAAGAACGTGCACTTCCAGTATCCGG  
CCAGAAAGGACGTGAAGGTGCTGCAAGGCTTGAATCTGACCATCAATCGGGGCGAGA  
CCGTGGCCCTCGTCGGAGGATCCGGCTGCGGCAAGTCCACCTGCCTTCAATTGATCCA  
ACGTCTCTACGATCCTCACAAGGGACAG

>novel\_circ\_000387

GTCAATAGATCCGCCATCTTGAAATCCTACAACCAATCGAAAGATCGGACAAGTAACA  
CGTGGTCTCGAAGTACGCGCAGAGTGTAGTTTACGAACGGTAAACGAAACGCGAGG  
GACATTCTGTTGGCCTCCGTCGTTCTCTCGGTTCTCTCCCGGGTTTCCTTAGTTTATAAAT  
AAACGACGTACTCGATGGGCTTACCTGGTTGCAAATTTGGGAAAATCCATCAAGTGCC  
GTTTGAAGATTAATTTGCAGCATCAAAGAAAATAAAAAAGTCATTTAAATAAAATTGAT  
GAGGGTTGATTCGTAAGACGTATTAACCACTTGTTAATAGTGTTGTCTAATTGTTACCTT  
ACCGAATGGATCTTAATAATGTCATTACATTTAACTTACAAAATATAGTTATTTAATTCAT  
GATTTAACGTTTTTTTCGTGACATGCGTTTACGTGAGTGTCAATTATTTTTCAATTCACTTT  
ATCTTTTTTGTTTTTTTATGGAAAACGATGCATCGTGATCTAGTTAACCGAATATAACAT  
CGGTACGGTGAATGGAAAGTTAACAGATCACGCGACAGTGATGCAGTGCCGTAGTGTC  
AGTGCCAAGTGCCACGTGCCCATTGCTTGGATTACTTGAAGATGCCGTCTCGTCCGGTGG  
ATACTATGACGACAGGAATCCTTTGCTCAAGGGCACCTTATCGAG

>novel\_circ\_000388

GTGAATCCGGACGCCCCGGGACAGCACGACGCAGCAGATTCAATCAAAATTAGGCAACT  
ACTCGTTGGTGAAACATCTACTGGACGAGCCTAAACGGCTGATCGGCATCGAGGGTGT  
ACCGCCGAGCCCTGCCCCCTCCGCCGCCGACCTCCTCGTTCCTTCGAATGAGTTCCAGT  
TCGGTCGGCGCCAATTCCAGGAGCTCGCCCTCCTCCCAAGAATTCAAGAAGCCGGGA

```
>novel_circ_000390
```

```
>novel_circ_000392
```

```
>novel circ 000393
```

GATAAAAGAATCGAGAAGCTCAAAAAGGGAGAGAGAGAAGCAAAATGAGGATAACTT  
GCTTACTCTTTGGCCTCTCGTTGCTGTTGGTTTACGTGCACTCCAATCCGATCGTCAAG  
AGGGAGACGGAGCCCGTCGAGCTCAATCCATTGAACGAGATATACGTGGTGGAGGCC  
GAGGATGACCGAGGGGGCGAGGAGAGGGCCGACAGGGACAAGAGGAAGATCGCAGT  
GGCGAAGCTGGGCGTATCCAACGGCATAATCAATTTCTGTCTTCAACAACTGGATTCTG  
TGATCGACGCCAAGACGAAAGCTCTGAGCGATCTGGACGAGACGAATCGAATAAAGA  
ACAAGGCTTACGGGATCGACGTGAACAAGTCTGCGACCAGCAAGTTCATCAGCGAGC  
TGGTGAACGCGAAAATTCAATCGGCGACAGGGAGCATCGGGCCGGTGGTGAGCACTG  
CCCAAACTTCTTCTCGAACACGAAGAGCGGATTGACGAATGCGTTCTGTCTCGAACT  
GGCCCCCTCAGCTCCATCGCCACCGGTTTGAGCTCTCCGCCCTCCACTGGGGACAAC  
AAGGAGAATTACGAAACCAAAACGTGCAACGCACTCAACTTTCTAGGAAACATTTTGA  
ACGCCAGCTTGGCGTGTTGTCGAACTCGAAGGGTCTTTCTAGCGATTGCGCGTTTTTC  
GAAGGG

>novel\_circ\_000395

ATCGACCGAGGAACAACCTCTGAACAAGAGATGCAGCGGTGTCCGTATCTCCACGAGAT  
GAAGGAGCGCCTGCTCTCCCAGCCGACACCGACAGACAGCCTGGACATGGAACGACT  
CGACGGCACTCCCGTCAAGGAGCCCAACCTGCACACCGATTATCCTGCCCACACCAAC  
CCTGGGGTGATACCGGATCCCCCGAAATGCCGCCCGACTCGCTCATCGGCACGGTCG  
TCAAGCTGAATTCGGATGGTTACGGCTCGCATACGTCGCCGGCGCACGCGAGGCAGCC  
TTTAGTGCCTCAAAACGCCAACAACCCACCCCTCTGCCTCACCCCTACGCACTCCGGC  
CCGGCGACTGGCACGCTGCCAAAGAACGCAA

>novel\_circ\_000396

GCGTGTGCAGCAACGCGACGGCCCCATCGGTGAGCAGCATCAACCGAATCCTACGGA  
ACCGCGCGGCCGAACGGGCGGCCGCCGAGTTCGCGAGGGCGGCCGGCTACGGGTTGT  
ACGCGGCGGGCCCTCACCCGTACTTCAACAGCGGCCACCAGCACCCAACGACCAGCC  
ACCACTTGCCCGCCGGTTGGCCGGCGCCGGGGGCGGCTGCCACCCCTGGATGCTGCC  
ACCGTTGGCTACCGGCATCTCGGGCGCCGCTTCCGCCCTGCTCCTTCCGCCGTCCTTGA  
GCCAGGCGCGGCAGCCGCGGCCGCTGCGGCCGCCTCCGCCTCCGCCGCCGGCGCGC  
CTGACCACTCGCTGCACGCGGACGCCATCGCCCGGGGCTACTTGCAAG

>novel\_circ\_000397

ATTCATGCGATAAAGAGGCCGTGATGGTTTCTTAAAGCAACAACCTGTAAATGTGTAT  
ACGTCAGTGTGGCACATGAGTCATTGGAGAGGAAACGAGGACGGGGCGCTCGATGCG  
CCCACAATATCGTCGTCCCTGCGCGGAAAGTGAGCGTAAATCGCCGAAGCGATCCGAA  
GATGGCCGAAGTAAGGCCGTGCTGCGGCAGTCGAGCCCGAGCGATCCCCGATCGTG  
GTCGTGCGTGTTGGAACGACAGGTACGGGCAGTCAGTAGTGGATTAGCGGCAACGGG  
AGCAGCAGCAGCAGCGTCCACGGCGGCGGCGGTGGTGCAGCGCTAACAACAGAACG  
AAACGAAGAGGAGGTATGATCGCTCGAATCGACGGAAGACATCGAAAACGGGTAAA  
TAACATCGCATTACCCCTGTCCCGGAAACGTCCATTGAGTGAAACGAAGGTGCGCGCA  
AACGCTGGCTGCTCCACGGAATATGTATGTGACGGAGGTGGGCGAGGGCCGTGCGAA  
AAAGTGGCGAAAACCTGTGAGAGAGGTGCAGTGCCTCCACGTCCGTGGCAGTGGCGGT  
GTTGGTAGTAGTGGTGCTGGTGGTGTGGTGGTTCGTGGCGGTGGTGGTGGCGGCGGTGT  
GGCGTTGCTGGTGCTACTTCGGTGTATATGCGCGCGTGTATTGGTGGGACACGCACTTC  
GGCGGGGCCGTGGTTCTCGCTCTCTCTCCTGTTACATCTCATTCCCTCTTTCTCTCGAAC  
CCCTCTATTACCGCGACTATCCTCTTTGTCGCCCTCACGGAGGCCATCGTACCGAAAG  
CGACCGAGCCAGGCCAGGCACTACGCAAGATGGCTGTGTGTCGCTAACGAGAGGCCG  
ACAAACCAGACGGGGAAAAGACAACCCGGGGATAAACGGAACATGCTGCTACGTGAT  
CGTCGGGCCCGTCCCTGAACAGAGAGACACTGGCCAAGAAGCGAGAG

>novel\_circ\_000398

CTACTCGGAGTGTCAACGCGCAGAAACCTGATATTCGGTAGATGCCTTTTGAGAGCCG  
CTGGCCCGAATCAGCGTGGAACCATACAAAGGCACATGGAATGTGTGACATGTTTCATC  
CAAACACAGCAGACGAGTAGCGTCAACGGCAGCAGCAGCAGCAGCAGCAGCAGCAG  
TAACAACACCGTTCACCACCACAGCAAGAAACGCAAGTTGGAGTACAACGTGAGTCA  
GCCGGTGATCCAACACGCATTGGTCCAATCGACCGGCGACTACCAATTAGACAATACC  
GGTCTGCAACAACGGTACTCCGTGAACGGTGCTAATACCGCATTTAGCTCGCTGCACA

ACAATAATGCGCTGCAGAAGAGTAGCCCGAACCAACAGACCCTGGTACGAGCCTCGA  
CGATCAAGCTCTTAGACACGTACCAACGCTGTGGCCAGAAG

>novel\_circ\_000399

GGAATGTGTGACATGTTTCATCCAAACACAGCAGACGAGTAGCGTCAACGGCAGCAGC  
AGCAGCAGCAGCAGCAGCAGTAACAACACCGTTTACCACCACAGCAAGAAACGCAA  
GTTGGAGTACAACGTGAGTCAGCCGGTGATCCAACACGCATTGGTCCAATCGACCGGC  
GACTACCAATTAGACAATACCGGTCTGCAACAACGGTACTCCGTGAACGGTGCTAATA  
CCGCATTTAGCTCGCTGCACAACAATAATGCGCTGCAGAAGAGTAGCCCGAACCAACA  
GACCCTGGTACGAGCCTCGACGATCAAGCTCTTAGACACGTACCAACGCTGTGGCCAG  
AAG

>novel\_circ\_000400

GATTGTTGTTTCGTCGATGGTGGGAAGATCGAGGAGAAGAGGAAAGCGTTTTGGGACG  
CCTCGCGTGTAAGGAGAGAATAACCGAGAGGCGAGGGGGAATAAATCACGTTTGCAC  
AGAGAGAGAGAGAGAGAGAGAGAGAGAGGGAGAGAGGGAGGAAGGGAGAGGATACGT  
AGCGGTCAGGACAGGTAGCGAGGATTCACGGTTTCGGCTGTCATCGAGTTCGACTCGAA  
AGACGCGATCGATGGCGGCACACGAGGCACGCAGCCATCGGTGTTGTCAATTCTTCGC  
AACGAGAGACTGATATTTGGCTCATTCTCGACACGGGATTGGGCGATAGTACAACACC  
GCGGGAAGAGATGTCTCTTCTACCGACGTTTCGCGTCCCGAGCTTGCGTCCCGACCGC  
TCCTGAGTCTAGTCGATCTTCTCTGAATCTTTGTCCACCTTTGCCTCTTTCTTCGAGTCT  
TCTTCTTCTTCTTCTTCTTTCCCTTGCCCCCTCTTCTCCTCCTCTCCTTCGTTTTCCATTC  
TTCGAGGAGGGAAAGGGGAAAGGAGGACGGTCGGTCGTGGAACGAGGAACCGGAAG  
ACTGGATCGAGTTCGAGGAAGATGCACGACGAGGCGACGTCCGCCGAGACCAGCCCG  
AGGACGAGCACCACGAGGACCATCGCCGCGACGACGAGAGACGGTCGGATGTGAGG  
AGGAGGAGGAGGAAGTGTCCGGATTATCGAGATCTTGGGACAAAGGCGGCGAGAGGA  
ATTGGCCGTGGTGTGTGATCGGGTGACGAGGAAGGCAGGCATGGAGCCGTCAACGT  
GGTGACGCGCAGGCTCGGCGGCGGCGTAGCGACGTCCGCGGAGTCGACGATCGCCG  
TGA CTCTCGCGAAACTTGGCGCGACGACCACCTCCTCCCGTCTCTCGAGCGACGCTTC  
CGCGATCATCCCCCAACCCGACCCCTGCCCCCTCTTCTCGCCGACGACCACGACCAC  
GGACCTTTCCCGTCGCTCTGCGACCTGTGCGAGCGGCTTCGCGGCGGACGCCTCGTCT  
CGGGCGGACGGTCGGAAACGGACGAGGAGGAGGAGGGGGGCCGCGGTTCGGATGACG  
AGACGCGGGCGATCGGTGGCGGATCGCGGCCACGCTTCCCCCGCAGGGGTCGTGTGCG  
GCGAAGGATCGACGAAGGCCCGACGACGGCCCTTCTCGAGCGGCTGCGTGTCCAGC  
GTGGTGCGGTGGAACCTCGACGAGGTTCGGCCAGATCTCTGCCCGCGACCAGCCACGAG  
CAGCAGACGTAAACCTGGACCATTTTGTTCCTATTCCTGGTACTCGTGTTCTCCGCTTCC  
GCGGACCTGCAAAAGCCAACGTCCAGAGAACGTTCTCCTCAAAGAAGAGGGAG

>novel\_circ\_000401

TGTGCCAAAGCATAGACATAAGAAACACCGTGCGTCAGTTCTCAAGACTGAAGGGATG  
CCGACTAGTCGAAGGATTTCGTACAAATTTTGCTGATCGACAACGCCGAGCCATCCGAG  
TACACCAACATCTCTTTCCCGGAGCTGAGAGAGATCACCGGTTACCTGCTTCTCTATAG  
GGTAAAAGGGTTGCGCAGCATCGGTGCGCTGTTCCCAAACCTGACCGTGATCCGTGGC  
CACTCGCTGTTTCATCAACTACGCCCTCGTCGCGTTCGAGATGATGAACCTGCAGGAGAT

CGGGCTGCACAGCTTGACGACCATCGTCAGGGGCTCCGTCCGCTTCGAGAAGAACCC  
CGCGCTCTGCTACGTGGACACGATCGACTGGGACCTGATCGCCAAGGCTGGCAAAGG  
GGAGCACGTGATCTCG

>novel\_circ\_000403

GGAGTGGCCAGCATTCCGGACTGTAAAGATCAGCGGGCCAGCTACGAATGGAAGTGT  
GGTCGACGACGATCCGGAAAATGGATGTCGCCAAGAGTGGAACAGAGGACTTCGTGA  
CGGTGGTGAGCGTGGAGAGCGTTTCATCATCCCCATCCCCAGGAGAATTTTCGTACGGT  
GCTCTCGATCGGGAGCAGGAAGGAGGAGGAGGAGGAGGAGGCTGCGAGGTTGCCGC  
TCGAGGAGGAGGTGGAGGTGTACAGGTTGCCCGGGGAGCGGTTGGGCTTCGGCCTCA  
AGTTCGAGGGTGGGAACAAGACGTCGGAGAGGGTGAGACGGTTGTTCGTGCAGAGCT  
GCGCGGAGCAGAGCCCTGCGAGCAGGGCGAGATGCTCTTGGGGCACGCTGGGGGAG  
GGCGACGAGGTGCTCTCGATAGACGGCGTGCCGGTGACGCACATGACTCGGCTGGATT  
GCGTGAGGCGGTTGAAGGAGTCGCAGCTGGTGATCAAGCTGATGGTGAGGTGCAGAG  
GGGCGCTGAGGCCGGAGGTGGTGAGCGCCGAGAAGAAGACTTGCCCGGAGAGGGAC  
AAGGTGCCGCCGAGCTGCCCTCGGCGCCCCCCCCCGGTCCCCCCCCGCAAGTTGAGA  
CTGGCCCGAGGCCTGGCCGACGGCGAGGCGAACCCGAACCCGGCCAAGCGGTCTGTG  
GAACGCGGCGAGGGCCAATTCCCAGAACGCTTCCCCCGACCACTCGCCGACCGCCGC  
GGCCGAGGCGAGCAAATCGACCTCCTACGAGAGCTGCGAGTCGTCGCCCAGAAGCGG  
ATCGAGCCCCAAAGGATCCCCCCCCGAAGGAACGTTCCCCGGAACTGGCCAAATCGGG  
GGTGAAACAGGAGCCGCCCCCCGGAGGCGATGGTGACGTGGACGCGAGGTGCGAGTG  
CGGCTCGACGCACGGGAGCACGTCGGACGACACGGGTAGCTCGATGTCGACGGTGAT  
CGACCGGTTCTCGAGCTCGGACCGGGTCTCGACCATCTCGACCGCGTCCACGGCGTCG  
ACGGCGTCCGAGCAGCCGGGCGACTTCTCGCGGATCGACCAGGATTCGAGAGATCGT  
CGAAACCGCCCCGCCACGTCCGCGATCTGTCCATTCGAGGGGGTGGACGACTATTACGC  
GTCGAACCCGCCCGACTACCTGCTCCGCCGTTTGGCAAGCTCCGAGGCGGTGACCCAC  
GTGGAGTCGCGGGGCGAGGTGGAGAAGATCACGGCCGTGGTGCGGCCAACACGGT  
GCTGATCGAGGAAACGATCACGTTTCAACCGCCGTTGAGCTTCCAGGACGCGCCGCTG  
AGCTACGGCCACGAGGCAAGGCCCCGACCTCTTCTACACCGCCGACCTCGCCGCCGACT  
CGACCACCCACTTCAGGCCGATCAAGGACGACGTGGAGCTGGTCGAGCGCGTCAACA  
GCGCGCCCCGACTCCTCGGACAGGACGCCGCCTCCCCCTCCAGCGAGGAACCACGTAA  
ACAGGATCACGGTGAATCGGCCGTCTGTCGTCGAGCAGCCTCGACTCGCGCCCTCCTCC  
TCCCCGTTCCACCAACGAAGGCGCTCACGCGCCTCTCCTGCCCCCAAACCGTTGCC  
AGAAGGGACGTCAAGATCAGGAGGAAGAGGCCACCGCCGCCGCCGCCGCTCCGCC  
GCCCCCATCCTCCCAAGAACCGAGACCAAATCCTCCGTCTGTTTCGTCTCCGCTTGTT  
CATTGCCAGAGTCTCGGCAGACGAGCTTCGAGAACGAGGACGAGAACGAGAACGAG  
GACCAGCTGTGCCTGGAAACGATCGCCGCCGATCAATTGGAGGAGGCCAGCCTCGCG  
AGAGCGTGTCTGGAGAACGGCAGAGCACGGGAGGAGAAGGAGGAGGATGGAGGGTT  
GAACGGGGTTGAGGAGAGGAGGAACGAGGAGACGGACGACACCGAGTCCATGGAGA  
ACTACGAGGTTGGGGAGGGGTACAGGACGAACAAGGTGTTGGAGATCATCGAGATAA  
GGAAGGCGAGAGCGTTCCCTCCCCGAAGGGGGGCCAACGTTTCTCCCTCGAGCGAGA  
AGAACGAGGAGAAAAGATTGTTAGGGGAGGCAGAAGGGACGAAGGAGGATGATTTT  
GCCAGCCGGAGGAGGCGGGAGGGATGGAGTCGGACGAGGAACAGGTGACCAAGTTC  
AACGAGCCGGTGGACGAACCTGGAGCAAGGGGGAGGGAAGGAGGTCTGGGCGAGAGA

GGGAGGGCGAGGAGAGCGAGGGCTCGTTTCGATCGTGCGCCGATCTAACCTCGGCTAA  
TCGTGGCGGCGAGGAAGCGGTCTGTGGAGGATGACACGACGAGCGAGGAGAGCGACG  
AGGGGGATTACTATTGGCAGAGCAACCTGGCCACGATCGGGGAGGAGGAGGAGACCA  
ACTCTCTGGAATACGCGAACCCGAACAAAGAGGGCGGGCGAGAGCGAGGCGATCGAAG  
CGCAGGGGAAAACGGAGCGACAAGACTCGGCGGGCAAGGAAGACGCGTTCGATGCA  
AATG

>novel\_circ\_000404

GATCCGCCGTACCGCAACAACGAGAGGGGAAGGAGCATGGGGGTCTGGGCCGATGCGG  
TCGCGGCCCATGGAGAAGAGGACACGATACCTCGCCGTACAGCGGCGTCCCGTATCTGT  
CGCCGCCGCCCCCGGACACGTGGAGGAGAACCAATTCGGACTCGGCACTCCATCAGA  
GCGCCAACGAAGCGTGCCAATCGACCACCACTATCCCCATCGGCGAGATCAACACCC  
CATAAGCGGATCCGGGAGCGAGAACAGAACTTGCATTACGGATTTCATCGAACGGCCG  
AGATCCTCCTGCGAGATACCCCGAGTGCCTGGAAACAA

>novel\_circ\_000405

GATCCGCCGTACCGCAACAACGAGAGGGGAAGGAGCATGGGGGTCTGGGCCGATGCGG  
TCGCGGCCCATGGAGAAGAGGACACGATACCTCGCCGTACAGCGGCGTCCCGTATCTGT  
CGCCGCCGCCCCCGGACACGTGGAGGAGAACCAATTCGGACTCGGCACTCCATCAGA  
GCGCCAACGAAGCGTGCCAATCGACCACCACTATCCCCATCGGCGAGATCAACACCC  
CATAAGCGGATCCGGGAGCGAGAACAGAACTTGCATTACGGATTTCATCGAACGGCCG  
AGATCCTCCTGCGAGATACCCCGAGTGCCTGGAAACAACATAGATCCGAGCTCTCAGC  
CAGCGGGGCAGCAAATTTCCATAGGGAACACGCGATCGTTGCCCGACCTGGCCCATTT  
CCAGTCGGATCAAGAGGATCACTCGAGCAGCACGACGCCGTTTCAGCAACAACCATTTA  
TCAGTGCCTGTAACTCTAGGTTTCTTCACACGTGTAAGGGTGTGGCGTTGGAGAACA  
GCACAAGTACTTCGCAACAGGATCTTCAGAGCTACTCGCAACAACCGCCGATGGCCCA  
GCCGCCGACGGCGACCAACCCACAGCCCGGCCGCCACCACTACATTTATCAGCAACCG  
CACAGTCCTGTGCCACCGCAAAGTCCGAAGTCGTCGCAAACGCAGCAACCGCAGCTC  
AACTCGTTGGGCTCGTACAGATCCTCGCAGCAGGTGAACAGGCCGTCGCCGCAGTCGT  
CGCCCGGGCTAACGATTCAAGGGAGCCCGTTGAGCTACAGCAATAATCCATCGGCGCC  
TCCCAGCCCCACGGGTACCCGGGTCCACCGAACTTGACGTCGGAGAGCATCGACCA  
AAACAGTTATTTTCATGAACCAGGCACAAGCGGCGGCGCTTCAACAGGATTTTCGAGCAG  
TTCACGATG

>novel\_circ\_000407

ATTATATAACAAACACAGATATGTTTGATCTTGAAAATGATCTACCTGATGATCTATTGTC  
ATCGGGGTCTTGGGGTTCTGCAACTGAAAGTGCTAAACCACCAGCAACAGGTCCAGG  
TCCAGGGCAACAAAATGGTGCTCTTGATTTCAGAACTTAGACAGCATGTACAACAACAA  
CAGCAACTTTTCGCATCATCTCATACAACAACAAGGCAACAAAACTTGGTTGCCAATT  
CATTAGCAATGGCTGCTGGAACCTTTGGGTAATAAAAGTCCAAATATGCAATCTCCACCA  
AATGTTTCTGTCTCTAAAGTTGTTGATCCACAAATGGTTGTGAGTTTGGGAAATTTACC  
AAGTAGTATAGCCAGTTCCTTGGCAAATAATCAAATGTCCATTGCTAATTCGATGGGAG  
GCCTTCAATCGTCAATGAGCATGGCTGGAAGTAATCCTACCATGTCAATGCCAGGAGG  
AATTAATTCTGTCTCTAGTTATGACCAGCAGTGCTAGTGGAATAAACAATATGGGTGGAA

TGGCAGGAGGAAGTTTAATTGTAACCAACAGTTTGAATAAACAACTATAAATACTGTA  
ACTATGATGGGCCCTAATACTCAAGGAATTCATCATCCTAGTGGACCACATGGTGTTC  
CCAAATGCAAAATGGGCCTGGAATAATGAATACTAGGGCTGTAACAATGCAACAACAA  
CAACAAGCTCATATGGTTGGTCCAGCTCGAGGTCAAAGTCCACATCAACAAGTACATC  
AAGTTGGTATTGTTGGTCCTGGTCAAGGAGGTCCAAGAATCCAAGCTCCTCCAAATAT  
GACAAGTATGCCAAATATGGGACAAATAGGTGCATCAAGTCCTTATTATGGATCTCCAG  
CTAGTGC GCAAGGACCTGGTGTACAGTGTGTACTAATAGTCCTGTTGGAGTTGTTGCA  
CCACAACAAAAAGGAGTGGGAACAAATATGACTGCTATGCAAGGTAGCAGATTTGGA  
GGAAGTGGAGGTCTATTGGTTCTACAAATGTTGTGGGTGGGCAAGAAGGTGGTATGG  
CTCAACAAGCTCAACCACCTGCACCAAGTCCAGCCCAACCTCAGTCTGGTGCACCAA  
GTGGAGGTCAACCTGGTCCACAACAAGCTACTCAGGGTCAAATGCCTGGCACTGGTG  
CTCCAAGTGGTACTACAAAATCAACTGCTGATCCAGAAAAACGAAAACTTATCCAACA  
ACAATTAGTTCTTTTACTTCATGCACATAAATGTCAACGACGTGAAAGTCAAGCAAATG  
GTGATGTCTGGCAATGTTCCCTGCCAGATTGTAAACTATGAAAAATGTATTAACTCATA  
TGACTGCTTGTCAAGCAGGGAAAAATTGTACGGTACCACATTGTAGTTCTTCAAGACA  
AATTATTAGTCATTGGAAACATTGCAATCGCAATGATTGTCCTGTATGCCTACCTTTAAA  
GCAAGCAAATAAGAATAAAACGACAAATACTGCTGCAGCATCTACAACCTCAACCAAAT  
AGTCAACCAAATCCGAGTCAAACCGAAATGAGAAGAGCGTATGACGCATTAGGAATTC  
CATGCCCTACTACAACGCCTGGTTTAGTAGCAAGTCAATGTGTTACTAGGAGAATGCCA  
ACACCAGGCATGCAAGGAACACCCGGAAGTATAGGAAATGTCCGATTAACCTCAACCTC  
AAACTCAGACTGCACCAGGTCAATCCATAGTTGGTGCCGGGCAACAAGTTGTTGCTCC  
AAATGTTTCTCTTCTTTAAATCCAGATCCTAATACAGTTGGTGTAGCTAGTAATCAAGC  
AGCACCTACCACCGGCCCCACGCCTGCTGCTGCAGCAACTGCTGCAACATACAACAA  
TCTGTTAATATGCAACAATTATTTGGTTTAAATGATTCAAGGACAACCTTAGTGTTCCAAAT  
GAAAATAGATTGGCTAATCTTCAACTTCCAGCTGGACTTCAACCAGGTCAAGTAACAG  
CAACATCTGTACAGGAATCAAAGATTGGCATCAAACCTGTAACACCTGATCTTAGAAAT  
CATCTTGTTTATAAGTTAGTTCAAGCAATATTTCCAACCTCCTGATCCACAGGCTATGCTT  
GATAAAAGAATGCATAATCTTGTTGCATATGCAAGAAAAAGTTGAAGGTGATATGTATGA  
AATGGCCAATTCGAGATCAGAGTATTACCATTTGCTTGCCGAAAAAATTTACAAAATTC  
AAAAAGAATTGGAAGAAAAACGACAAAAACGAAAGGAACAACAGCAACAGTTACAT  
GCTCAACAACATCAGCAGCAACAACCTCAACCCGAGGAACATCTGGTCCAGGTTTAA  
GGCCATGTGCTCCTCCAGGTGTTGGTACTGTCCCGCCATCACGACCAGTTGGAACAGT  
TACCCCTAGTTTACGTAGTCATTACCAAGTATGGGACAACCTGGATCTTTACCTACAAT  
GGGCATTCTCAACATAATAGAATGCAATTTCCACAACAACAACAAACGCAACAACAA  
GTACAAGTTCAGGCCCCAACTAATGTCCAAGCTCAGGCTCAAGCACAAGCTCAAGCC  
CAAATGCAGCAACAACAACAACAGCAACAGCAGCAAGGGATTTTAGTTGGTCCA  
TCTGGTCCTAGTCCAAATGGACAGTCGAGTTCCAATCCTAATGTGGTTCCAAATCCTGG  
TCTTAGTCCTTTTGGACAAGCACAAATGTCACAAGCAAGTTTAACCACTACTACTACGT  
CTGCAACAACCTAGTCAATTCCCAACCTCAAATGGTACTTCCGGTTTACCTAACAGTCCT  
TTACAAAATCAACATCAATTTCTGATATTATGAAAGCTAGACTGACTCAAGCAGCAAT  
TGTGCATCAACATCAACAACAACAACAGCAACAGCCATCACAACCTCAATCTCAACAA  
CAACCAAGTCAGTCGCAATTACAGCAACCAACAAGTACTTCAAATCAAAGCGCTACAA  
CAACGTCAATGCCACAAGCGCCATCACCTTTTAGTGGTATGCAACAACAAGTAACCA  
ACAACAAAATCAATTTAATAATAGTCGGCCTCTATCAGTTTCAACACCTAATGATAATGG



CATCAGCACATCAACTCCACAAACAATACCACCTCCTGCTTCTAGTGGACCTAGTCCCG  
GTCCGGTAACAACGACAAACGGACCTCAATCTACAACCTCCACACCTAACACACCACT  
AGTTCCTTCATTAATGACTCCAAATCAGACAGTTTCTTCCGCTAATCAAACCTCCACCTC  
ATCCTGCTACTACACCATCTCCTGCTGGTCTTGCAAGTCTTGAAAAAGGTATGACATCT  
CAAGAAAGAGCTGCATTAAATGCACCGAGAACTTCATCCATGTCTTCGCAAATGGCTG  
CTATTACAGCTGCTTTAGATCGTGATAATTCTCCTAGTCCACCAATGAATAATAATAAGG  
GAAAATTGGATTCCATTAAAGAAGAAAAATATAAAAAATGGAAATCAAAACTCAAGAAGA  
TAGTTCTGAGAATCATAGAATGGATGGAGGTAAAAAGTGTTAATAATGATGTATCTATTAA  
AACGGAAAAATAAAATGGAACCAATGGAAGAAGGATCCAGTGAGAGTATCATAAAAGA  
AGAACCCACTGGTATTAAAGAACCTGTAACCTCCAATATCCAGTCAAGATACCACAGACA  
TTAAACCATTTGGTTTCTGAACCAATACAACCAAGCGGAACAACGGACAAAAAAAGGT  
TGTGTTTGTTTAAACCTGACGAATTACGTCAAGCATTAAATGCCAACATTAGAAAAACTT  
TATCGTCAAGATCCGGAATCTATACCATTAGACAACCTGTCGATCCTCAAGCGTTAGG  
AATTCCAGATTATTTGATATCGTTAAAAAACCAATGGATCTTTCAACGATCAAAAGAA  
AATTAGATACTGGACAGTATAGTGATCCATGGGAATATGTAGATGATGTATGGATGATGT  
TTGACAATGCGTGGCTTTACAATCGCAAACTTCACGCGTTTATAGATATTGTACAAAG  
CTTTCTGAAGTCTTTGAGCAAGAAATAGATCCTGTAATGCAAGCCTTGGGATATTGTTG  
TGGAAGAAAATACACATTTAATCCACAAGTACTATGTTGTTATGGAAAACAACCTTTGTA  
CAATACCAAGAGATGCGAAGTACTACTCCTATCAAAATAG

>novel\_circ\_000408

TACCGTTTAAAGGGCCGCCACGCTACAACCCGAAACGGCGCTCGGTGGCGTTCGGAG  
GCACGTCGACGATGACCACTAGCTGCTCGGCCAGCAACTTGGGCACCCTGACCAGGAT  
ACCGTCCGCCGAACACCAACACGCCTCTGGCGGAACAGGAGGAGGAGGAGGAGGAG  
GGGGAGGTGGTAGCCTGACCAGAACGATCTCAGTGGAGCAGTACGCGGTGACGAGAG  
TACCGTCCGCCGAGCAATACGCGACCGGCAACCTGACCAGAGTACCGTCCACGGAAC  
AATACGCCAGCCCTATCGCGACCGCGACCTCCACCACCGCCAATAACAACAACAACAA  
CAGCAATAACAGCACAGTGTGAGGCTGTCCACGGGGGATCATCATCACCATCATCAC  
CACCACCATCATCACCATCAATACCAACCGGCAACGAGCGCCACCGGTACGCTTACCA  
GAGTGCCGTCCGCCGAGCAATACACGACCGGCACCTCACCAGAATACCGTCCGCCGA  
GCAGTACGCGAACAGTATCGCGAGCAGGACGGCGGGGAGCCGCATCATCAGCCGC  
CGCCCTCGCCCCCGAGTACCGTCCATCGAACCGACGACGACGACGACGACGACGACCAG  
AAACGACCAGATACAGAGAATACCGTCTCGGATTACCAGAGCCCCGAATTCGCTGAGG  
GATCCTAACGCGAGATTACCGACCACCGCGGAGAACTATCAGAACGTAAGAATGGAGG  
GACTGACGAGGCTGCAAGAACACCGGCTCGAGCTTCAACACCGTCTCGACATGCACA  
GAACGATGGAGATGCCGCCCTCGCCCTCGCCGAGCAGCAGGAGTCTAGCTCCTTTAG  
CTCGGCCAGCTCGAGCCTATCCGAAGGCAGCAATCAACCGTCCGGTGAAGATTCAGCC  
AGCATCGTCACAG

>novel\_circ\_000409

CTCAAGTACAAAAGACGGGTCTACAAGATGCTGCACCTGGATGAAAAACAGTTGAAG  
GCGATGCACACGAGGACGAACCTTGCGAAGGTTGCTCGAGTACGTGGCAAACAGCCAG  
GTCGAGAAGATCGCCAAGATGTGCAGCAAGGGCCTGGATCCTAATTTCCACTGCCAGG  
AAACCGGAGAGACTCCCCTCACCTTGGCCACCACGTTGAAGAAACCCTCGAAGGTGA

TAATAGCGCTGGTGAACGGTGGCGCGTTGTTGGATTATCGAACGAAGGAGGGTTTGAC  
GGCGATGCATCGCGCCGTGGAGCGGAACAGTTTGGGAAGCTGTGAAGACGTTGCTCGA  
GCTCGGCGCGAGCCCCAATTACAAGGACACGAAGGGCTTGACGCCGCTCTACTACAGC  
GTCATCTACAAAACCGATCCGATGCTGTGCGAAACGTTGCTCCACGACCACGCGACGA  
TAGGCGCCCAGGATTTGCAGGGATGGCAGGAAGTGCATCAGGCCTGCCGCAACAACC  
TGGTCCAACACCTGGATCACTTGCTCTTTTACGGTGGCGACATGAACGCGCGTAACGC  
GTCCGGCAACACGCCGTTGCACGTATGCGCTGTGAACAACACGGACTCGTCGTGCATA  
CGCCAGTTGCTGTTTCAGAGGCGCGCAGAAGGACAGCCTGAATTACGCGAACCAGACT  
CCCTACCAGGTGGCGGTGATCGCTGGGAACATGGAGCTGGCCGAGGTCATTAAGAATT  
ATCAGCCGGAAGAAGTTG

>novel\_circ\_000410

TGGCGTGGCCGTGTCCTGCGGGGAATGCAGCAGCAGCGGAACCAGCGACATCACGGA  
GCCCCGTTCCCCGTGCAGCACGAGCAGCGACGAGGGGGTAGCAGCCGTGAGGGGGCGC  
ATCCGCTAGTCCACTGCCGTCCCTACCCAAGCTGGCGCCCTCCTCGCAGATCAGCACC  
AGGCCCCAGTGGCCCTGGACCCCGCCCTCGCGGCCACCGCGTGCTCCACCTACAAG  
AGGCTGAAGGGCGAGCCCGAGGCTGGCGCCCTGCCGAGGTCCGGGGCCGCGGATCCC  
GGTTTCAGGGGGAGCGGCAAGTCGGCCGGCAAGCCGAGCGCCGCCGCCATCATCAT  
CACCACCACCACGAGTCCCAGGGGAAGATCACCGAGTACTTCAAAACCCAGATCAAA  
CCCCAGCAACCCAAGATCAAGAAGAGCAGCGAGGCGATGTCGGTGCTGGTCGCGAAG  
AGTTCGTCGGAATTTTCGAGGCCGGCTGCCACTGTGCAGAGGAGCAAGGCGGGTCTG  
GCCAAGTACCTGGGCGCCGTGTCGGCGTCGGGCAACGATTGGGAAGTGAGAAGCCTG  
GCCATGTCCCCGCCGCCACCAAGAAGCCGCCGTTGGTCGTGGTGCCGAGGGCGAAC  
GGCAAGATGGAGAAGAAATTGCCTAAACCGGTGCCCAGCCTGCCATCTCGAACGAG  
GTGTTGAAGAGCATCCCCAGCTGCAAGATCTCCTCGCTCAGGCTGACGTCGGACGCGA  
GCTCGAACGCGAAGAACGGCGTCTCGTCCCCGCCCGCGACGCCCGCCCCCGCCCTGG  
GCAACGTGGAGGCGGCCGCGCTCGACTTCAAGGGTTGCATCCTTTTCGAAGCCGCACG  
TGAACGAGAACAACAATCTGACGAACGGGTGCGGGGGGATCCTGGGCTCGTTGAGGG  
CGTCGCAGGGTGGGCAAGACCCGTTGAAGAGATTCCCGCCCGAGGAGGGTGGCAAGG  
AGGGCAAGGAGAGGCAGGTGAGGCCCGCGGACGAGGACGACGTCGAGGAGGAGGA  
GGAGGACTCGAGGAGCAGCGAATCGAAACACCCCTATCGCCGATACTCTCCGCGCCG  
ACCACCATACGATTCCCTGCACGGGAGCCGGAGAAGGACAGGCAACAGGCGACGGAC  
AGCGGCGTGTGCCGATGGGACAAGTGCGAGGAGAGCTTCGAGTCGAGCGGCGAACTT  
CTCGAACATTTGCAGGTAGCTCATATCAACACCCAGACAGGGAGCGACAACCTTCGTAT  
GCCAGTGGCAGGGTTGCAAGGTGCAGGGGAGGAGTTCCTGTTTCGAGGAGGTGGTTGG  
AACGGCACGTGTTGTCTACGGTGGGAACAAGCCCTTCCGGTGCATAGTCGACGGCTG  
CGGCAGCAGATTCAGCTCTCAG

>novel\_circ\_000411

TGGCGTGGCCGTGTCCTGCGGGGAATGCAGCAGCAGCGGAACCAGCGACATCACGGA  
GCCCCGTTCCCCGTGCAGCACGAGCAGCGACGAGGGGGTAGCAGCCGTGAGGGGGCGC  
ATCCGCTAGTCCACTGCCGTCCCTACCCAAGCTGGCGCCCTCCTCGCAGATCAGCACC  
AGGCCCCAGTGGCCCTGGACCCCGCCCTCGCGGCCACCGCGTGCTCCACCTACAAG  
AGGCTGAAGGGCGAGCCCGAGGCTGGCGCCCTGCCGAGGTCCGGGGCCGCGGATCCC

GGGTTTCAGGGGGAGCGGCAAGTCGGCCGGCAAGCCGAGCGCCGCCGGCCATCATCAT  
CACCACCACCACGAGTCCCAGGGGAAGATCACCGAGTACTTCAAAACCCAGATCAAA  
CCCCAGCAACCCAAGATCAAGAAGAGCAGCGAGGCGATGTCGGTGCTGGTCGCGAAG  
AGTTCGTCGGAATTTTCGAGGCCGGCTGCCACTGTGCAGAGGAGCAAGGCGGGTCTG  
GCCAAGTACCTGGGCGCCGTGTCGGCGTCGGGCAACGATTGGGAAGTGAGAAGCCTG  
GCCATGTCCCCGCCGCCACCAAGAAGCCGCCGTTGGTCGTGGTGCCGAGGGCGAAC  
GGCAAGATGGAGAAGAAATTGCCTAAACCGGTGCCCAGCCTGCCCATCTCGAACGAG  
GTGTTGAAGAGCATCCCCAGCTGCAAGATCTCCTCGCTCAGGCTGACGTCGGACGCGA  
GCTCGAACGCGAAGAACGGCGTCTCGTCCCCGCCCGCGACGCCCGCCCCGCCCTGG  
GCAACGTGGAGGCGGCCGCGCTCGACTTCAAGGGTTGCATCCTTTTCGAAGCCGCACG  
TGAACGAGAACAACAATCTGACGAACGGGTGCGGGGGGATCCTGGGCTCGTTGAGGG  
CGTCGCAGGGTGGGCAAGACCCGTTGAAGAGATTCCCGCCCGAGGAGGGTGGCAAGG  
AGGGCAAGGAGAGGCAGGTGAGGCCCGCGGACGAGGACGACGTCGAGGAGGAGGA  
GGAGGACTCGAGGAGCAGCGAATCGAAACACCCCTATCGCCGATACTCTCCGCGCCG  
ACCACCATACGATTCCCTGCACGGGAGCCGGAGAAGGACAGGCAACAGGCGACGGAC  
AGCGGCGTGTGCCGATGGGACAAGTGCGAGGAGAGCTTCGAGTCGAGCGGCGAACTT  
CTCGAACATTTGCAG

>novel\_circ\_000412

ATGTGCCAGCATGTCCTCGGAAGCCGGTGCGCCAGAAGCAGCGAGCAAGATCGACAG  
GCAGGCGTCGGTTTACGTGTTCCCGGGTCCGGGGTGTGAGCATTACACCGCCTCGTCG  
ACACAATCGGCCGACGCCTCGAGCTCCGCCTCAGCGATAGTCCCGAATGTATTCGCAA  
AGGGGGGGAAGTTGGAGAACGACAACGCGGAGAACGAGGAGCTCGGGGGGCGAGG  
AAGGCGAAGGCCGTTTCCGAGGACCCATGCGAGATCGGCAAGCCACGGTGGAATGTT  
GGCGGAGTGTCTGACGAGCACCACCGGATTCCAGCCTTACGCGGGATCGCATCTCGGC  
CCTTTGTCCGCGATCGGTGGGACGAGGCCCTCGGCCTTGAAGAAGCCCGGCCACCAG  
AGAGCATTACGCCAGGGTCAGGTGGTTCGAGGTTTCAGGGGCACGCGACTGTCACGGGC  
CACAGCCGTGTCGGGTGCAAAACGGATTTTATCCTCCCGCCTGGCCACAAGGAGGACT  
CGAAGCCGCCACCGCCGGGAAAGTGCCCTCTTTTCGTGGCCACTCGCGACAAGCATC  
CAGATCGGAGTCGATATATACGATAAGACGTAGCGTTGAACCCCCCTGGTGGAGAAAA  
GTTTGGGCCCCGATACTTTGGCCCTCTACCGGAGGAGCCACGTTTAAGGACAATAGTACC  
GAATCATTTAGTCCCGCCAAAAACACCACCGAGTCAACATCCCAACGGCAAGAGAGT  
GAATAATAGAGTGCGTACAACAAAGTACACCTTGTGAGCTTCCTACCTCGCAATTTTT  
TCGAACAATTCCGCCGTGTGGCCAATATATATTTTGTATTTATCGTTTTGCTTAATTGGGT  
GCCGGTCATAAATGCTTTTCGGCAAGGAGATATCCGTGATACCCATCATTTTCGTGCTTGG  
TGTTACGGCGTTGAAAGATTATTTTCGAGGATCATCGGAGGCTTATCAGCGATCGTCGTG  
TAAATAATTCCACCTGTCGTGTCTACGTTTCG

>novel\_circ\_000414

ATGTGCCAGCATGTCCTCGGAAGCCGGTGCGCCAGAAGCAGCGAGCAAGATCGACAG  
GCAGGCGTCGGTTTACGTGTTCCCGGGTCCGGGGTGTGAGCATTACACCGCCTCGTCG  
ACACAATCGGCCGACGCCTCGAGCTCCGCCTCAGCGATAGTCCCGAATGTATTCGCAA  
AGGGGGGGAAGTTGGAGAACGACAACGCGGAGAACGAGGAGCTCGGGGGGCGAGG  
AAGGCGAAGGCCGTTTCCGAGGACCCATGCGAGATCGGCAAGCCACGGTGGAATGTT

GGCGGAGTGTCTGACGAGCACCACCGGATTCCAGCCTTACGCGGGATCGCATCTCGGC  
CCTTTGTCCGCGATCGGTGGGACGAGGCCCTCGGCCTTGAAGAAGCCCGGCCACCAG  
AGAGCATTACGCCAGGGTCAGGTGGTTCAGGGGCACGCGACTGTACAGGGC  
CACAGCCGTGTCGGGTGAAAAACGGATTTTATCCTCCCGCCTGGCCACAAGGAGGACT  
CGAAGCCGCCACCGCCGGGAAAGTGCCCTCTTTTCGTGGCCACTCGCGACAAGCATC  
CAG

>novel\_circ\_000415

ATGCCTGCATTGTGCCTGTGTCTGTCCCTGTCTGTCACTTAGACTCTAGACAACAACAA  
CAACAACAACAACCATCACTAATGAACAACCAACAACATCAACTCCAACATCAACAA  
AACAATCCACCGCATCTAGCGTACCAACAAGCGAATCACCACAGCTACACGACTGTAA  
CCACGTCCAATCAACATGGGCCCCACACCTATGGGTGCCCATCAACAAGGTCCCGTACC  
ACCCACCTTCAACAACAG

>novel\_circ\_000416

GAATATAAGAAGAAACCCCGATTGTGAAGGATTTTATCATAAAATAATCCCCCTGATATA  
AACATTAACGGTCCCTTTTTTTGAGAATAATTTCTACTAATTTTCATGCACATATATTTATATT  
TTGTTATCAGTCTTGTTTCTCTTGACACGTTTTTTTCTCGTGTATCATGTATGTAGAT  
CATAGAACGATTTTTTCAGTGATGTACAGGTACGAATATC

>novel\_circ\_000417

AAATAGAGAAGATTGCGGAGAAGTTGCGTGATTAAATTTGGCCAACGTAATAATAATTT  
TCTTTATCCATTTGCATCTGTAATCTCTTTTAACTTTAAAAATTACGTTTTTTAATCGAGA  
TAGTAATTTTCTTAGAAATTTGTAGATTAATCTTATATACATATATATATGTATTTTTTCGTT  
ATTTCTCAAATAACACGTAAAG

>novel\_circ\_000418

CTTCTGGGACATTCCGAGCGGTTGGTGGCAGGCGAGCACGGTCACCATGGGGATCGG  
GGTCGCGATCGCGGTGATCGGGGCCCTCACCTGCTCGCCGCCGCCTCCACCTTCCTC  
CCGCACATCCTCAAACTCCGAGGCACACCAGGGTGCTTGGCTCTCTCCAGTTGCTCG  
CCGCAGCGATGATATGCGGCGGTCTGGTCATGTATCCGATAGGATGGGACAACAGGGA  
GGTGCGGGAGTCTTGCGGGAAGGGTGCTAACGTGTACAATCTAGGAAAGTGTTCCGTT  
TCATGGTCGAGCTATCTGCTGGTAGGCTCGGTGGCGCTGTTGATGCTATGCTTCGGGCT  
GAGCTTCTGCGCCGCGGACACAAGCCGTCCAACCCGCACACCGATCCTCTGCGCATT  
TGACAATCGAGATACTCTCAATCGATTACGCCTATGCCTCGCCGAAGACGACCACTCT  
CTCCTTCGTCACGGTCTGTTGAGCCGTGAGGAGGGCGAGGAGAAGGAGGAGGAACA  
GGAGAGAAACAGCAAGGAGGAGAAGGAGGAATAGAAGCATCGAGAATCACCTCTAC  
GAGCGTCTCATCCG

>novel\_circ\_000419

CCCGGCACCCCTCCTCGGGGGGCCACGACAGTGGCGTAGGCATGAGTCCCGCCGGT  
CAAACGCCTCCGCCGAGATCCTCCGTTCTTCCCGACGTAGGCGAAGAGACGAATCAAC  
CGCCCGACAACTCGCCACCTCTTCCACGACCACCAACGTTTCCGGCCAACTCGAGTC  
GGACTCGAGCCCCGAACGATGCCGATCCAACGGCGAAACCAGCAGAGTCAATCGCC

CAAGAAATCCCCGTCCCCGTGTTCCGCCGTTGTCGCGACGACGACCGCCGTCACCACC  
ACAACGAGCTCGGGGATCTCCTCGACGAACATCGCGTCCGAACAGTTGCAGATCGTTT  
GCAAACCGGACGGTACGTATCAATTGGCCTCCGTGAATCCGAACGTGGTGTCGAATCA  
GAGGAACGTTTCTCAATCTGCAAAATATCGAGGACGGAGGAGGCGGTGGCGGAGGAGG  
AGGAGGAGGAGGATCCAACTTTTACGGCAAATCAGAGAGGCGAGAACGGCGGGA  
ATGGCAGGAACACGTACGAGAGATTGACGAAAGGGGGCGCGCAAAATTCCGGGCAGA  
ACGCAGGCTTGCCGAAATTTCAACAGGCCTTCGGTAAAACCTATATACACGCTTTCCACA  
GACTCGTCGAGCGCGAGCGGCGTGTGACAGGTGGCGCCGCTCGGCGGAAACTCTG  
GTACAATCGGTCTCTCCCCAAAAGGCGAGTAACCTCTCGAAAGCTGTTCAAACGTCCG  
TGCCCAACGCGCAACAGGCGAGCCCGTCTACGGGGATAAACGTGCAATCCATCGCGA  
ACATTCCAAACACGTTACAATTATCGACCACGAGTAGACAGATATTGAATATCGTTCAA  
AGCTCCGGGAATAACGCGAACGTGGTGGCAACCAGCCCGAACGCGAGTCAAACGTTG  
ACGCAGTTGGTGCAAAGTGTTTCAAGACGCTCCCCCGGTGTCATATACACGCACAAAA  
TCCCTGTCACCATATCGACCACGAATCCAAGCCAGTTGAACATCATACTACGATATCG  
CACGCGAATTCGATACCGACCGGAAGGACACCTGTGGTCAAATTGAACATCATCCGAG  
CTCCTTTGAGGCAACAAAATATCACGGGAGCTATACAAGCCGTACTCACCACACCAAG  
ATTGCAACAACAACAGCAGCAACAGCAACAGCAGCAGCAGCAACAACAGCAACAGT  
CCACGGTTCGAACGGACAGTTTGCTCGGTTCCCCCAT

>novel\_circ\_000420

ATGACAGTGGTACAGCGGGCAACGACGCTGGGGTACAGTTGGTAGTGGCGTGGAGGG  
CGCACCGCGTGAGAGGAGCGGAAGATAACCCGGAAGAGGAGGGCGGTGAAGAACGA  
GGGAGGAGGAGGCGGAGGAGGAGGAGGAGGAGGAGGAGGAGGGGGTGGAGGAGGAGG  
AGGAGGAGGAGAAAGAAGAAAGAGGGGAAGACTGGCGGAGATAAGAAAACGGAAGA  
AAGGGAGGAAAGTAGTAGGCAGAGGGAAGGGGAAGGGGAAGGGGAGAGGGAAGAG  
AGGAGGAGGAGGCCGGTCTCGTAGAGGGGCATCGTCCACGGATTTTCCGGTGATCGG  
GGATAATATCGTCGAACTTTGGGGGGCTGCGAAGGTCGCTGATGTCCGCTACGAGCCC  
TGCCCCCTACCCCTGCCGCCAGCTACCGCCACCTACGGACGAACAACAACAACG  
GAGGAGGAGGAGAAGGAGGAGGAGGAGGAGGAGGAGCAGCAGCAGCAGCAGCAGCAGC  
GGTGAAGGAAGAGGATCGGACGCCGCCGCGCCGCGAGCGACGCCGAGGAAAGTCGC  
GTCATAACCTTGCCTTATCCTTTGATCCGGGAAGAAAGAATATCTTTTACCAGCCTC  
GCCGACCACCACCACCAAACGTTCTCTCCATCCATACTTCGCTATTACTGCTGCTGTATC  
ACCGATCAGCTCGACCACCCCTCTGAATGTCTTCGCACATCCAAAAGTCGTGCGTG

>novel\_circ\_000421

CGAAACAGCAGAGCGAGATGGAGAGCACGGACCAATTGGAGGGCGACGAGGAAGGA  
GTGCAACAGGAATCTCTGTGGAGAAGGAAAAAGCTGGATTTTCGACAGAGTGAACAGA  
AGGATGAGAAGGGCCTGCAGGAAAGCCGTCAAGTCGCAAGTTTTCTATTGGTTGATCA  
TAGTATTGGTTTTCTGAATACCGGCGTTCTTGCGACCGAGCACTACAATCAACCTCAT  
TGGTTGGACGATTTTCAAGAAATCACCAATATGTTTTTCATCGCGTTGTTTACCATGGAA  
ATGATGCTGAAATGTATAGCTTAGGATTCCAAGGTTACTTCGTCTCGTTGTTCAATCGT  
TTCGATTGTTTCGTGCTGATCGGTTTCGATCACCGAGATGATCCTGACGAACACTCACGT  
GATGCCACCGCTCGGCGTTTCCGTTCTCCGTTGCGTCCGGTTACTCAGGGTATTTAAAG  
TGACAAAATATTGGAGGTCGTTGTCGAATTTGGTGGCTTCCCTTTTAAACTCTATACAAT

CGATCGGTCTCTGTTGCTACTGCTCTTCCTTTTTATCGTGATCTTTGCCCTGCTGGGTAT  
GCAG

>novel\_circ\_000422

CGTCGTCGTCCGAGCACGGACGTCCGAAGACCCAGCGTGGCGGACCTCGAGAATAAG  
ATCAATCAGCCGAGCACACCTCTTCGAGATGTCCGACCACCGGGACCACCTCAAATCA  
TCGATGTCCAGGAATCGTATTCCGCGGTGGAAGACTCGACGGCGTACCTCACGGTCGG  
AGTTGAGGGTACGCCGGCGCCTACCTTCAAATTCTACAAAGGAATCACCGAGATCATC  
GAAGGTGGCCGATTCAAGTTCCTTACGGACACAGAGACCAATACGATCACCTCTGCA  
TGAGGAAGACGAAGCCCAACGACGAGGGGCACGTACAAGATCGTCGTGAGCAATATCC  
ATGGCGAGGATTCCGCCGAGATGCAGCTTTACGTTTCCGACGCCAGTGGTATGGACTTC  
CGTGCTATGTTGAAAAAGAGAAGGTATCAAAAATGGGCAAGGGAGGAGCAAGAACAG  
GAAAAGGTAGATTTGAAGGAAGTGGAGAAACCGATACCAGCTTTGAAGAAAGTGGA  
AAG

>novel\_circ\_000423

AATGAAAAATTTGCTATTGTAGTCAATGTTGTGCGACCCGTATCGTGTCGTCCGACACGA  
TCTCCTTGCTTGGAAGAACCAGGTTACATTTGGTGGCGGTTACCAATGATATTCACA  
TCCAAAGTGACGGTAAGACCGACTTTTACGGTTATCGGTTGCAAATTGGTTCGATCGAT  
GAACGGTTTCACTGTAAACGATAAAATGAATTAAAACGCAATTTTCCAACATGCCCAT  
TCGACTCGAGAAATCGTATTATACTCACGCCAACGAGCTTTGGCAGTATGAGGATTGGT  
AGCCTCGCTAGGTTCTCCGGGACCTGCTTTGTTACAGCTCTTACTCTAAACTGATATT  
GATTTCTTCCCTCCAATCGTGTCACTGTTCCCGTACACACTCGTCCTTCCACCTCGGCA  
GCCTTACGAACGTGGTGCCAAATCTGTCTTTCATTTGATTATGTAACCTGTGATGGG  
TGCACCACCGTCTCGTATCGGTGGTTCCCATTTCAATTTACCATGTTTTCGGCCCAGTC  
GATGATTTCTGGTAGACCAGGCGCAGATGGAGGATCTAAAAGTCGAGTTTAAACGAGT  
TATAATGTTTCTCGACATAAGCCATCGAATGTACATATAATATAGTATAATATAGTATACAG  
TATATATAGTATATGTATGGTTCACTGCTGGAAAGACTTCTGATTGGTTAATGTAGAAGG  
AAACGCCTACTTGTTTCTAGCGCGGTATTTGTTACATATACTAATCCGACTCGAAGCTGA  
GTGTAAACAAAGCGTTCGAAGTGGGGATAGACTTCTTGACTTTGTGCTGTCCCCGGAC  
TTCTTTCCACCAGTAAACAGTATACATATATATATACATACCATAAGGATTCTTGCGCA  
TAATAGGAACGTCCGTTTGCACCGTTCCGATTCTCCCTCTTCGTTTACAGCTTTCACG  
CGAATTCGTATCGTTTTCCAGGTTCCAAACCAGTGATAGTCTGTTCCGTTTTGTCTGG  
ATCAACTATGCCAACTGGTACCCATCGGCCGGTCGTGACATCCATTTTCTCGACCAGAT  
AACCGGACAACGGTAAACCGCCATCGTCCCTCGGTTTGTTCCACTTCAATTTGCATCCT  
TCCTTGTGGATGTCCGTCCTTCCAGAGGACCTTCCGGTTTTCCGGGCTTATCTTGAAT  
GATAATCTCCACGTCAGCTTCGTCTGTCCAGAATCGTTCACAGCTTTGATGGTGTATTT  
GCCACTCAGTTTGCGGCTAGTTTGGGTCAAATGAATTTTGGTTAGGTAATCCTCGTTATC  
GATTTTCACGTTGGCACTTGTTTGAAGGACCGCGCCTCCAAAGTTCCAGGTAACGGTT  
GGAGGTGGTTCACCTTCGATGTCGACTTCTAGTTTCACCATTTGACCCGCTCTTACTTTA  
ATCGTTTTCAATTTATCGCGATTTATATGTGGTTTCACTGGAAAATGAAAAACGTGTATAT  
ATATAAATGTATATATATCGAAATTGTTGAAGTATTGTTAGAAAGAAGTTTCGAAAAAGG  
AATCGTAAATTTGATTGGATAAATTTGGAAAGAAACGCCTATTTTCATATATACTGATCC  
AGAACATCAATTCGTAATTAAATCTCGATTAGTGTAGACATCTAGAAAATCTAACGTATA

ATATAAAAATTATTTCTCAAAATATGTGTAGGCTAATTATGATTTGTAATATTAGTTTAATT  
TATAAATATAATTTTGTATTCGATTAAAATAAAAATAATTAATAAAGAATTATATATATAC  
AAATATATTATACAAATATATATAGATATATTAATATTATATCGAAATCAGTCTTAGATCCTA  
ATGTAGCTTCATACAAAATAATTTTACGACTTTGAATATTCAAATTATAGCTTTTCTATT  
ACTAGTGTAGTGCGTGGTATATCAACAAAGCGTTTGAAGTGGGGAGAGGCGGTCCTAG  
CGAAAACGCCCTGTCTTTGTGCCTTCCACCAAACCTTGTTTCCAGCAGTGAACAGTA  
CCGTTATAATCCTTCGTTAGGACCGCCTACTTTTCATTTTCAGACGCTTTGTTAACAATCCC  
TTGACATCGCACACTACTAGTGGTGTAGACAAACTATAATTTGAATATTCAAATCATAA  
AAATTATTTTCAATTATAAAATCACTTTAGAATAATCATTTAAGAAATTGAAATATTTTC  
CAAATTATCAAGTTATTTTAAACTATTATAAATCATAATTAATCTACACATGAGAAATAAT  
AAAATTTTACATTATATCAATAGAATTCTTTGGATTTTATGTTTAAGTTAACGCAACGAG  
ATCATTGTTTCCGATTAGTATAAGTACGGCAATGAACAGTACTCACGATGTCGCGCCTTT  
GCCACGTGCGGCTTGGTTGGATCGCTGGGTTCCGATGGCCCAGCTTTGTTAACGGCAC  
GCACGCGGAATTGGTACACGGAACCTTTCTTCAAACCAAGTGACACGCCCTTTTGGTTG  
GGGCGAGTCTGTTACAGTGGCCTCTTGCCAATTCGGCGACGGCTTCTCCTTCATTTCGA  
TTATGTAACCCGTAATAGGTGCGCCTCCCGTACTTTTCGGCGGTTCCCATTTCAAATCGA  
CACGATCCACGTCCCAATCTTCGAATTCGGGCACACCAGGCTTACTGGCTACGTCTAAA  
AATTATTGTTATTCAAACCTTATCAGTGAAACCTTTCTTATAGAAATATTCTTTTTATACGG  
GCAATTTTCAATGGTTTTCTCACCATAAGGATTCTTTGCAATGGTCGAACGTGTCGGTG  
ACCAATGGCTCGGATTCCCCTTCTTCGTTAATCGCCTTCACCCTGAATTCGTATTCGTGA  
CCCTCTTGAAGACCTTTAACGTCCATTTTCGGTATCCGAAGTACGCCCCGACGGGGACCCA  
TCTGCCGGTCGCTTTGTCCAGTTTCTCAATTTGATAACTGGTAATGGGTAAACCGCCAT  
CGTCTTCCGGTTTTTCCCATTTCAATTTCAAACCGCTCTTTGTAACATCGTATACCTTCA  
AAGGACCCTTTGGTTTTTCCAGGAGCAGCTGTTAATAATTTATGAATCGAATTAGTAATAA  
TAAATAAATAATAAGTTGTACAATATCAATTTTCAGAGATTTTCAATATCATTGGGCTTACA  
TAGTATCGTAACTTCGACCTCAGCCTCGTCTTCACCGTGAGGATTTACAGCCTTTATTTT  
CCACACGCCGGTATTTTTTTCGCACGCAGTCGGTAATATTGAGTTTCGTATTGTAATCGAC  
GTTGACAATTTCTATATTACCACCGCTCTGAACCGCCTGATTCGCGTGATACCACGTGAT  
CTCTGGAGGCGGTTCAACCACGAACGTCCACGTCGTATTTGATTGGCTTGCCAGCACGG  
ACCGTGATTGGTTTCAAGTTCGTACGATCGATTCTTGGTTTCACTGTAGGAATAAAAGA  
AGAAATGAAAGAATGACTCGATCGAACTTTACTCGAATACGTATACGTATTACGACAA  
ATAAAAAGATGAAATGAAATACGATATTTACGCGCTTTGTGTTTGCATATTTGCATCTTT  
GAAGCGTCGGATGGCGGAGATGGGCCGGCTTTGTTTCACGGCGATGATCCTGAACTGAT  
ATTCCCCGCGTTCCTTCAAGTCCCCTACTTTGGCCTCCAGTTGATTTCAGGTACCTCCA  
TCGCCTTCTCCCAATCTGGTTTGTAAACGATCCTTCTTCTCGATTATGTACTTCTCGATAG  
GCGCACCGCCGTCGAAATCAGGAGCGGTCCATTTCAAACCTTATCGACTCGTTGTCATAG  
TCGGTTATCTCAGGTGTTCCAGGTTTATGCGGCTCGTCTTAAAGAAACAAATCATCGAA  
ATTAGATTAATTATAACGCATGGAAGGAGCAAAATTTAAAACGAATCTGGAAGAAAGTT  
CTTTCCTTCTCGTCTTACCGTACGGATTTCTGGCGATGATTCCCCGCTCGCTCTCCAAAG  
GTTTCGGAATCACCTTCGTCTGTGACCGCTGTAACGCGGAATTTGTACTCGCTTCCCGGA  
TTCAATCCCGTCACCTCGAATTCGTGAGCGGCGCATTGCCCCGAACCTTTCCCACTCT  
CACCCACTTGCCAGTTTTCTGTGTCCAATTTCTCAATCTCGTATTCTTTGATCGGAACGCC  
GCCATCGTCTCCGGCTTCTCCCACTTCACCTTGGCCGACGTGGCTGTAATATCCGTCA  
CTTCCAACGGACCTTTTCGGCGCGTCTGGCTTGCCTGAACGAAGCAAAACGATACAAAA

CGTTTACTCGTTTCTTCATTTTCATATACGTATATACCATGGATCGATAAAAAAGATAATCG  
ACAATTTACCGAGAACAGTAAGTTCCACGGTTTCCTCGTCCTTTCCGTTAACATTCTCC  
GCGATGAGGGTATACTTTCCAGTGTCTTTACGCATCGCGTTTACGATGGTAAAGTCTGT  
GTGATAATCCACGTTCTCGATCTTGATACGTTCCGGTAGTAGTAAGAGGTATGTTGTCCCT  
CCAAATCCACTTAACTTCTGGAGGCGGTTTCGCCTATGATGTCTACCGACCATTTGTGCG  
TGCGTCCAGCCTTGATGACTATAGACTTGAAATTCGTTCTGTGCGATTCTCGGTTTAACTG  
AAATTTACATCGAGATGCAATTATATATTTATATAAAAACGAGGTTTTGTTTTCAAGAGCT  
AACTTACGATTCTTGTGCTTGCAAAGATGATTGTGCGGTGGGCTCGCTAGGCTGACTGGG  
GCCCCGTTTATTGTGGGCCCTAACTCGGAACCTGGTAGATCATCTTTTCCTTCAAACCTTC  
GACCTTTGCCTCAGGAGTGGCGTCGGTCGTTTTTCGTCACTTCCACCCAGTCGACAGCG  
AATTTGTCCTTCATCTCCACGGTGTAATGAGTGATAGGTCTACCGCCGTCGTTCTGAGG  
CTTCTCCCACTTCAAGGATACGCTGACGTTATCGTAGTCGAAGATTACAGGTTTGCCAG  
GCTTGTGACGGCTCGTCTGGTTAAAAAAGAGAGCAAAGTGAGCAGACCAAAAAATGAT  
AATTCGAAGGGAACAAGATTGTAACAAGATTCACCATAAGGATTCCTGGCAAGAATCG  
CTTCCTCGACTTCGAGCGGTTCCGATTGCCCCCTCCTTGTTACAGCTTTTACGCGGAAC  
TTGTACTTCTTCTTCGGCGTCAACCCGGTGAAGTTGAAGCTAGTTTTCGTCCGGACCCAC  
TTCGCCGGCAGGGATCCATCGTCCCGTATCCATGTCCATTTTTTCCAACACGTAGCCGGT  
AATATCGGTACCTCCATTATCCTCGGGCTTTTCCCACTTTACCTTCACATGGTCAGCGCG  
AACTTCTTCCACTTTCAACGGGCGGTCGGTTTTCGAAGGTTTGTCTGGAAAATAAAAT  
AACGATTCTGTGAAAGATCAATTGATAAAAAAGTGAGATAAGTGAAAAGTGAGGAGAT  
ATACCGAGAACACACGTACCGACGCTCTCGCAAGTTCCAGAGCTATTGGACAGAA  
CAAGCTTGTATTTTCCAGAATCAGGCCTAGTTGTCTTCTAACGGTGAGCACCGTGTTT  
CTCTCGTATTTATCGATCGTGATCCTCTCGGCTGTATCTTGAACCAACTCTTCTCCCCA  
AGAAACCAATGAACCTCCGGTTCAGGTTACCGGCATACTTGATATCGTACTTGATTAT  
CTGCCCCCTTTTGTGACGATTAAGTTGTCGACACCGTCCCCGACGATGTAAGGCTTCACGA  
ATCGGCACTTGGTATGATCGGTTTCGTGGCGTCGGACGGTTCACCGGGGCCGGCTTT  
GTTACGGCTCGGATCCTGAACTCGTATTGGGTACCCCTCCTTCAACCCGTCTATGGTCG  
CCTCCGTTATATCTCCCTCGATTTCTTCCCCTTCACCCACTCTTT

>novel\_circ\_000424GTGGCGATCAAATGCGAGACCCCGGTGGACCCGTA CTCTCGTTCTGTGG  
ACGAGGAAATGTCGATGGGCGGCATAAGGACGGCGAGCAGTCCGGTTCGGGAATCCCG  
AGAACATGACGTGTCCAGGTGGTGGGCAAGCGGTGCTGGCTACACCTACGTCGACGC  
CGCCCCGGCTCGCTCTCCGCGCCGCAACATCTTCAAATGAACCTAGGCGTGATGAACGG  
CAACGTGAATCCCCAGTTGACGGCGCACCAACCGAAAAAGAGAGGCCGCAAGAGGA  
AATCCGAGATGATTCTCACCCCGGAAGAAGCGGAGCTAGCCGAGGCGAAGAAACGGG  
CAAAGACGTACAAAGAGAGGAAGAAGCACGACAGATTTCGACGGTATGCCGGAAGAG  
GAAGTGAGCAAGCGCGTGCTTCCGGATCATCTTACCAACAATTTGGACATTATCATA

>novel\_circ\_000425  
GAGTGATGGTAAAGCAGGAAGCGAGGGATGACGGTTACGAGACAAGTCCGGACCTCG  
AGATGAGGAGCACCGGTGGTGACAGCAGTCAGCAGTACCACACGCCGCTGACACCGC  
ACACACCGCACACACCGCACACGCCGCACACACCCCTCACGCCGATATCGGCGACAG  
CGCATCAACCCAGCAACCTGCCTCCGCCGCTTCCACCCCTCGGACAGGTGGCGATCAA  
ATGCGAGACCCCGGTGGACCCGTA CTCTCGTTCTGTGGACGAGGAAATGTCGATGGGCGGC



ATAAGGACGGCGAGCAGTCCGGTCGGGAATCCCGAGAACATGACGTGTCCAGGTGGT  
GGGCAAGCGGTGCTGGCTACACCTACGTCGACGCCGCCGGCTCGCTCTCCGCGCCGC  
AACATCTTCAAATGAACCTAGGCGTGATGAACGGCAACGTGAATCCCCAGTTGACGGC  
GCACCAACCGAAAAAGAGAGGCCGCAAGAGGAAATCCGAGATGATTCTCACCCCGGA  
AGA

>novel\_circ\_000428

GGAAGATGCATCCCTGTTCTCGCAGCTGAGACCGCCCCGTAGACTGCGCCAGTCGGCC  
CCTCCTCGTCCACGAGCAATCACTAGAAAAGTAAGAAAAGCTCTAATATCGTCTTGCGTC  
TCGTCTTAATGCAATCGCAAATCACGATTATCAATTATATCGCATAAGATAAATAGAAG  
CGAGTGCAAGACTAAATAAAAAAAAAAAAAAAAAAAGAGCTTAAGCGCGAGAAAGG  
GGGGTGAAAAAGAGTGAGAGAAAGGGGGAAAGAAAAGGGACGCAGCAAGCTACAA  
GGAGAAGAAAACGGGATGTTTTTATCCAAAAAAGTGGACAGGATGCATAGACACTAT  
ACATAAATTTAGTATATATATATATATATATATGTATATATTTTATCGCAAATACTCGATTAA  
AAAAAAAAAAAAACAAAAATAAAAAAAGGATTTCGCTGCGTGCGCGCGCACACGCAT  
CCGTTTTTTTCGAAATTTAGTAAAGCTAAGAGGTAAACCTAAAAAAAAAAAAAAAAAGAA  
GAGGAAGAAAACGGAAGAAGAAGAGGAGAGAAATAAGAGGGGAGGAGGAGAAAGA  
CGAAAAAGAAAGGAAAAGAGAAGAAAAAAGTAAGAGAGAGAGAGAGACACTCGAC  
TCGAGAAAAGAGAAAGAGGGAAGAGAAAGAGATCGCGGGAGATCATCGGTGAAGAG  
AAAATGGCCTCGAGCTGTTCCATCCGGTGTGGTTCGAGAAATATCCTGGTGAATGCTGC  
CGCTACGTTCTCGCGCTCCTCGTCGTTCTTCGATGTTTCGCCAACGCCGAGAAACCAT  
CTCCGTGCCAGAG

>novel\_circ\_000430

GTAAATGGCCAAGATGTTTCAAATTCGAGCCACGAGGATGCGGTACGGTGCTTCCAAT  
CGGCCCAAGAGCCGATCATCGTGGAAGTATTGCGGCGTCAGCCGCAACAACAACAAC  
AACAACAACAACAGCAGCAGCATCATCACGGTCACCGAGTACATTGTGCTCAAGAGG  
AAAAAGAGTCGGAGAGACGAGAGCACGGAACGAGCAACGCTTGGCCGAATCTCGTC  
TCGACCGCTGTGCAGACCGATTGGGCCGGACTTATCGAGACCGAGGAGGAGGTCTGTG  
GACGAGCAGCCGAACGACAGTTTTCGAAGATTTTCTCGCGCACGACATCGACTTTGAGG  
AGGTCACGTTGCGGAAGACGGGCAGCGCCGAGAAGCTGGGGCTCACCGTCTGTTACA  
GTTCCGGTTCGGGCAGCGAAGACGCCGACACCGAGGTTTACATCTCGGAAATAGTTCC  
TGAAAGTTTGGCGGCGCGCACGGCCGATTGCGCGAAGGCGATCAAATCCTCAGG

>novel\_circ\_000431

TCCACCTACGTTTAAGACTGCAACACCCACCTCGCGTACGCAACTGAACTTCAGCTG  
ATGCGGAGAACAGCTGCAAGAGCAGGAAAGGCGAGAAGCTGAATTTCTGCAAAAATTTA  
CAGCAACAGAGACCAACGGCTGCTCCTCCAGGCCAGTACCTTCTACCTCACTCTCGA  
CTATCGGTGTAGACGTACCACCACAAGTCTTGCAAGTACGGACATTACTGGAAAATCC  
GACGCGCTACCATGTCTGTTCAAAGCAGAGAAGTCAAGTGCGGCAATACCTTCACGAA  
TCGTTTCGCGGTAAACGGAACGATCAGCGCTGGAGACGGAAACGTTCTCGGTAGAAATT  
CGGTGGAAGGTGCGCCGACATCCGCGCCGATGATAGTGCAGAGCGCACCAACCCGGCC  
CGACGGTGATCATCCAAAGCCGACGATCCTCATCTGGCCTCGTATCCACACGGTCCC  
ACGGTATTGCCGCTCGGTAATCAGGTTGCGGCCAGTCCAGATCCTACGACTGGTGCCAT

GTCACCAGGTCTTTCCAGCGTCGCGACCAGCAATTCTGAG

>novel\_circ\_000432

GCGGAGGATCTTTTAGACGACATACTGTCGTTTCAAGCCAACCTCTCTGGGTGATAATTT  
AAAGGACAGCCAGTCGGGAAGTCTGACCAATATTCCCGAGTTGCAAATCAAACCGGA  
ACCTTTGTTACTCACGGAGGCGGAGATACATGCGCTTGCCAAAGATCGACAAAAGAAA  
GATAATCATAATATGATCGAGAGACGACGACGGTTCAACATCAACGACAGAATCAAAG  
AGCTCGGCACTCTTTTACCGAAAACCAACGATCCGTATTACGAAATCGTTCGGGACGTT  
AGGCCGAATAAAGGCACGATACTCAAGTCATCGGTGGAATACATAAAATTGTTGAAAA  
ACGAGTTGACGAGAATGAAACAGAACGAGGTGAGGCACAAGCAATTGGAGCATCAG  
AATCGCCGACTCCTTTTACGAGTTCAAGAGTTGGAATTGCAAGCAAAAGCGCATGGCC  
TTCCGGTTTCTGATTTCAATTGGGCATCCACTTCCGGTAGCATGTTAAACGCCTTTGCTC  
GAAACAAACTCGAGCATCGCAAG

>novel\_circ\_000433

ATAAATATGCGTGTGCAAAATTACACGAATCGAACGAATCGAAAATAATTTAACGTACC  
TGTACGCGCACGCTTGAATAAATATGATAAAAGACTTGAAGAAAAGCAAAGATGAAAG  
AAACCAAGGATAAAAATTTGCGATCGATAAAAAAGAATTAACCTCGATTAAACTCGAAA  
GCTAAGAATTTAAGAAAAATCGTTGAAAGAAACGATTTCAAGGATTGGACGAATTGCTC  
GTGGATATCTCGTGGACGATTATATCTCGTGGTAAGATTACGAAACACAATCATTATCAT  
TTCCAGCCAATCGAACGTAATTTTTCCATTATCTCGAATCGTTTTTCGAATACTCTTCCA  
ACAATGCTTTCCTCTTTCTCTCGTTTAAAATTTAAAATTGCTCGAGATTATCGTTGTTAC  
AGATCGATCGTCGATTTCAAATTGATCCTTCCGAGCCGTGAGCTAAATAAAATGGATAC  
GGATGGATAAACGTGGAACAAGGATCGAACGAATAAATATGCAAACCTTTTGCAAATTA  
A

>novel\_circ\_000434

ATAAATATGCGTGTGCAAAATTACACGAATCGAACGAATCGAAAATAATTTAACGTACC  
TGTACGCGCACGCTTGAATAAATATGATAAAAGACTTGAAGAAAAGCAAAGATGAAAG  
AAACCAAGGATAAAAATTTGCGATCGATAAAAAAGAATTAACCTCGATTAAACTCGAAA  
GCTAAGAATTTAAGAAAAATCGTTGAAAGAAACGATTTCAAGGATTGGACGAATTGCTC  
GTGGATATCTCGTGGACGATTATATCTCGTGGTAAGATTACGAAACACAATCATTATCAT  
TTCCAGCCAATCGAACGTAATTTTTCCATTATCTCGAATCGTTTTTCGAATACTCTTCCA  
ACAATGCTTTCCTCTTTCTCTCGTTTAAAATTTAAAATTGCTCGAGATTATCGTTGTTAC  
AGATCGATCGTCGATTTCAAATTGATCCTTCCGAGCCGTGAGCTAAATAAAATGGATAC  
GGATGGATAAACGTGGAACAAGGATCGAACGAATAAATATGCAAACCTTTTGCAAATTA  
AGTAA

>novel\_circ\_000436

ATTTACACGTTCCACGAACATGAAACGAGTACTCTTATTATCAATCTGTTCACTGATGGG  
ATTTCTCCAGTTTGCCAACCTCTACCTCGAAACGCGACCGAATACGAAGATATGTCCT  
ATTGGCTAAAATCTGGCCAAGAGAATCTTCGAAGGATCCTAGCTCATCGTAATAATGAA  
AATCGCGCGAAGAACATTATTATTTTCATCGGTGACGGGATGGGAATTTCTACGATCAC  
GGCTGGTCGAATCTACAAAGGCCAAATCAAGGGTAACACCGGCGAAGAATACAAATTG

GCGTTTCGAAATGTTTCCCAACGCTGGATTTCGCCAAGACTTACAACACGGACAAGCAAG  
TTCCCGATTTCGGCTGGAACAGCTACCGCGATATTTTCCGGCGTGAAATGTCGTTACAAG  
GTTATCGGCTTGGACACGAGATCTTCGTTCAATAAATGCGACAAGTACATCGATCAAGC  
GAGCAAACCTTACAACCGTCGCCGATTGGGCTCAACAAAAGTGGCATGGGCACGGGATTTC  
GTAACCACGACTCGGGTCACCCATGCCACTCCGGCAGGATTGTACGCTCACGTGAACA  
ATCGCGACTGGGAATGCGACACCTCGATACCGAAACAATAACAAGGATTGCGTGAAGGA  
TATAGGAAGACAGTTGATGGAGGATGAACCGGGAAACAAGTTTCAGGTAATAATGGGC  
GGTGGAGCGCAACACTTAGGTTTACCTATGGAACCGATAGATCCCGATACGTGCGTCAG  
GGGAGATGGGAAAAATTTGGTGGAATATTGGGAGGGAAACAACCCTGACGGGAAAGT  
GGTAACCAACACCGAACAACCTCTTCTCCGTCGATATCGCCAACACGTGCGAAAATTCTC  
GGAATCTTCGCCACCAATCACCTCCCCTACCACGCCGTCAAAACCGAAAATACGCCAA  
GTTTGGCCAATATGACCAAACAAGCTATCAAATTGCTCCGGAAGAACGACAATGGTTT  
CCTTCTGATGGTCGAGAGCGGAAGAATAGACATGGCCCACCATCACAATTACGCAAAG  
TTAGCATTGCGAGAGTTATCGGAACTCGAGGAGGCGATATTGGCCGCCCTTCAACTGGT  
CAAGTTGGAAGAAACATTGGTGATCGTGACTGCCGACCATTCCCACGCGTTCACCATT  
AACGGTTACCCGAAGAGAGGGGAACGACATCCTCGGTTTCGCCAACGATCCAGCCAAG  
CCGAACGTGCCTGCCTACGAGACGCTCAGTTACATCAACGGTCCAGGCTTCTTCTATCA  
TCGACGAAACGACAGCAGCAACGTTAACGAAACGTGGAGGCCCGTCGATCTGGATCA  
GACGCGCAATGATCCCTACTACACTCAAATGGCTGGGATATATTTGGAGGACGAGACGC  
ACGGAGGCGAAGATGTCTGGAGTTTACGCGATAG

>novel\_circ\_000437

CATTGGGTCGTGTTTCGAGAAAGTGAGCGAACTCATCATTCTAGTCCCAGCGTTATTGGG  
TTTGAAAGGAAATTTAGAAATGACTCTTGCATCCCGTCTTTTCGACTCAAGCGAATCTCG  
GCCATATGGACACGCCGAAACAACAATGGTACATGATCGTTGGAAATCTCGTCTTGATT  
CAAAAAATCAGTTCGTGTTGGCAGTGCCAGGCGATAGTGGTTGGATTTCTCGGCTCTG  
TGGTGGCAATCGTAATGGGAGCATCTCGAAACGGTACCATCTCGTTCGATCATGCATAT  
CTATTGTGCGCGAGCAGTTTGGTTACCGCATCCCTGGCTTCGTTCTGCTTGGATTGATA  
ACTGCAGGTGTGATCGTTTTCTCCCGACATTGTCACATTAATCCGGACAACGTCGCGAC  
ACCGATCGCAGCCAGTCTCGGAGATATCACCTCTTTGGCTTTACTCTCGTGGATATCTAC  
CATTCTTTACGAATCAATAAATAACAAGATTGGGTGCGACCCCTCGTGATCGCTTGCT  
ACATCCTGATTACACCTCTCTGGGTATGGATCGCCAAGAGAAACAATAACACAAACGAT  
GTCCTTTACTCTGGATGGACTCCTGTCATGATCGCTATGCTGATCAGCAG

>novel\_circ\_000438

CTTTGCTTCACACGCATTACGTACCGAATCTTAATCACGATCACGATGAAATTCTCGAG  
AATTTGACGCGATACTGCGGAAAATCAGTTTATAATTATAACCGAAGGCGATTATCCCCTT  
AAATGGGATTTTATAATAGTTTTTATTTTCGCTTATACCGTCGTCAGCACAATAGGTTACG  
GGAATTTGGCTCCAACGAACAGGCTCAGTCGCATCCTGATGATATTTTATGGTCTGATA  
GGCATACCTATGAATGGAATTTTGTTGACACAATTGGGAGAATTTTTTGGCCGTGTATTC  
GTAAAGCTCATCAAAAATATAAATCTTATAAGCATGGCCGTGACAATTATTATCCTAGA  
AAATTAACAACATTCGAAACGGGAAAAGCTGGATTGGCTGCACAAATATTTGCACACT  
TGTTGCCAGGTTTCGTTCATGTTTCATCTTTTCCCAGCATTCTTTTCTCTCATTACGAGG  
GTTGGAGTTACGAAGAAGCTGTTTATTACGCTTTCGTCACATTGACCACCATTGGTTTTT

GGAGATTACGTGGCAG

>novel\_circ\_000439

AGAATACTTTGGACGAATCAACTTTTCATATTGTACATATCGTGA CTGTCGTTTTGGGAT  
CATTGTTACTAACTGTGCTTGCAATATCGATCGCAATATTGATCAGAAAGAAGTTACTTA  
AGAAGAGAATGTCTAAAGGTCCGTACAAGATCATTTTAACTACATCGGATTTTCGTATTT  
CCTCAAGTGCCTCAAGTAGATTCTAGAAGAGTGGACGAGGGTATCGAAACAATGTTAT  
GCTGTTGGTTGCAACAAC TGAAGAGTTTGGTGGACCTGAAGTGGAAAAGCCGGATTT  
ACTTCAATTGGGAAGCGTATCTTCTTTGAAACCATGTTTACGAACTAGCACGGGAAACC  
TGGCACGTCATAATTTCTTCAAAGATCCTCGCGCAAGATACAAT

>novel\_circ\_000440

TTATATCATTATTAGTCACAATTATTGGTATAACAACCTTGCTTTTCGACCGAAATATTACA  
ATCTACAAATTCCTACTTAACTACAGCTGATAGAATTCATCTGAAAAAATACTTGAAC  
CAGGTTTAACATCAAATGATGTTACATTTATGTATTATGCAATTCATGGATATACATTTCTT  
GGTGAAGTTTTATCAAACAAACAAGATATTTGTAACCTTTATGATAAAACTTATAAAAAAT  
GAAAATAACATTACAAC TGA AAAAGCTTTTCATATTGCATCTATATGGCAAACCATAGG  
AAATTGTCAAGCCAATTCATTATCTAATATTATAAAGATATTTACAAATACAATAGAGAA  
AGAAACTTCAAGTATGATGGAAATATATTATGCAGTAAATGGTCTGAATATTTTATTGGA  
AAAATTGTCACGTGATAAAATTGACAATATAATAAAAACAGTACAAAATATGCTACGAA  
AGGATGACAAC TTTATGGAAC TTTGGGTTATGCATTTACATTGCTTCGGATTTTGGAAACA  
AGTGGTATGTTTCGCTTTTGATCGCATTGAAGACGCTATTATTCAAGCTGATGAAGTAGAT  
GGCCAATATTACAATTTGAAGGTGGTCTTTCAATAACTA

>novel\_circ\_000442

CAAACAACAAAATATCGAATTACCAGAATTTGGCCATTATGCTACTGGTATTCTGTTTCT  
TGATAAAAATTTCACATCAACAAGCTGAAGCTGCATTTGAAAAATTAGCTGAAGAATGC  
TCTTTGAGGGTAATTTGTTGGCGAGATGTTCCAACAGACAATATACGAATTGGTCAAGT  
AGCACGAAAATGTGAACCTTACATGCGTCAAGTCTTTGTTGCTGGTAATGAAGATATTA  
ATATTAATCTTGAACGACAA

>novel\_circ\_000443

GTAATTTGTTGGCGAGATGTTCCAACAGACAATATACGAATTGGTCAAGTAGCACGAA  
AATGTGAACCTTACATGCGTCAAGTCTTTGTTGCTGGTAATGAAGATATTAATATTAATC  
TTGAACGACAAGTTTTTATTTTGAGGAAAAGATCGTCCCATTCTATACCACAATTAGGA  
ATTAGATATTATATATGCTCACTTTCTATACGAACAATAGTTTACAAAGGACAATTGACG  
GCGGATCAATTATGGCTTTATTTTCTAGATTTGAAGTCTCCAAATTTTGAAACCTATTTG  
GCATTAGTTCATACAAGATTCTCCACAAATACATTTCTAGCTGGGAAAGAGCGCATCC  
TCTTCGATTATTAGCGCATAATGGTGAAATTAATACTTTAAGAGGTAACGTGAATCTAAT  
GAAAGCCCGTGAAGGAGTGATGAGTAGTAAAGTTTTTGGGGAACAATTGAAACAGCT  
TTATCCTGTAGTAGAGCCGAATCTCTCGGATTCGGGAGCCGTTGATTGTGTTTTAGAATT  
TTTGTAATGGTGGGTCAACGATCTTTGCCAGAGGAAATCTGAAGAAAATATATATTTA  
GGCAGTAATGACAATGGTACCAGAAGCATGGCAAAACGACTTAACAATGGCAACAGA  
GAAACGAGATTTTATCATTGGGCTGCATGTGCGATGGAACCTTGGGATGGTCTTGCTC

TTTTAACTTTTACGGATGGACGCTATGTTGGTGCTATTTTAGATAG

>novel\_circ\_000445

GAATGGAAAGCATAATTATACAGAATTGGGTCACGGATCATCTATTTATGAAGGTGTTG  
GCGAATGTATGGAAATGGAGAAGAGGTCTAGGGATCGTGCCTTATCAATTTGTCAAAC  
TATGTTTGTAGAACATCACGTTATAATTCGTTAAACAGCTAAATAATCTCGGTTCTAGA  
ATGGACAAACATTGGTTTATAGTCAGAGATACTTCTTTAAAAACGGATCGATTGATTAC  
GTTAGTTCCATTGACTAAAACTGTTTCATTGAATATAACTCCAATGACGAAGAATGTTTT  
GAATGATTTATTCTTAGCCCTGCAACATCCATACATATGCCCTATATTTGATATCGATTTTC  
TTGAATATGATAATAAAAAATTATGTAATTGTAGTTCAGCCAATAAGTCAAGGTAGTCTGA  
AAGATTTGATATATGGAATCGAAAGAACAGGTTGGAATGAAGATTGGAATCAAAAATAT  
AGTTCTCGTGGTAAAGGACTTCCTTTACCTCAAGTTCAACAAATGGGACGTCAAATATT  
GGAAGCATTAATTTTTTTTAAAAAGAAAGAGGATTCCGACTGTAATCCATTTGCATTCGG  
GAAATGTGCTCATTCAAATGGAGTCGCACGTCTCGCTGGCCTTGAAAATACGCTTCTT  
GGTTTTACCAGTCGAATACATCCATTAATTATTTCTCGAATATCACAACTATTTCAATTG  
ACATGACATGTTTTGGTCATATGTTATTTGAGATGTGCGCTGGTTACGAATTACCATCAT  
TTAAGCCAAATTCTGTTTCATCTATCGGATATTGAAATGTATCCTCAAGTCATTGAATTATT  
CAAATTCATATTTGATGAATTATCTAATCGTCATAAAATTATCGAGGAAATTCTTGTTTCAT  
GATTTATTCAGAAATATTGATCTTCGTGAAATGCGAAGTGCTCCCGTTACGTTATTTCTG  
CCAATCTTAACGCCGCCCATTTGTAACTTTCTCGACAATATTAACGACAAAATGCTAAT  
AAGAG

>novel\_circ\_000446

CAGTGACAGTGTCAACGCAATTGTCTATACTGCAGTTATCCGCAGTGCAAACGGATCG  
GTTGAACTGGCTATTTTAAATTTCTTGTCCAGAGAGAACTATTTAGCCAATAAGCCAG  
GAAAATTCATCGGAACACTTGCAAGAGCAAACCTTTAAAGCGAATGCAAAGCCTTTGCA  
TGTGCACGAGATATATCATATGCTCTACGTAAAGCTTATACGAGAGAATAATAACAGCA  
TCAAGATTATATGAGAAAGTAGAATGGGCATTTGCAATCCATGTTGACGCAAAGAAAGA  
TGACAACATTTCGGATCACAGTGATATGAAAAATAATAGATTATGCTATCACTATATAGTA  
GATGCATATTCTCATTGTCCGCTGATGAGAAATTCAGTTATGCACTTAAATTAAATACC  
GATATATGATCTGATCATTGATCCAATCAAAGTGTTTATAAAGCAGCAAATATCCCGGCA  
ATCTGGCAGCAACGTATTGAAAAATCATTGAGAGAAAAAGTTGGAAAAAGTATGTATT  
TTTCAACGATATATTTTCAACGCTATAACCTGCGACCATCGTATTGATGCCAAGGGATT  
ACACAAATCGGATAAATATATAGAGGCAATTTCGTGATGCACCAAAACCTACTACTGCTG  
AACTATTACAGCTATTCCTGGAGAAAGCAATATATTACAATATCTTCATTCTCAATCTATC  
CACGTTGGATCGATCACTATACACAAATCAATTCATATGGACACTAACTGCAGAAGAGG  
CTTGATGACAATCAAGAATATTTTGATCTCTCAAGTTCTAATGCCATATGATCCGACTCT  
ATTTTTATGACTAGCAACAGATGCAAGTAAGACAGAGCTTGAAAAATCTTATTATATAT  
ATTCCCTAATGATCAAAAATCCAAGAACCAACGAATCAATTTTTTATGCGATTAAAATAG  
TGTTGAATGAAACAAAGCAACACTCAGATAAACAAGGAAGCATTAGCGATTTGGACAA  
TCCAAAAGTTCTTCTATTATGTTTATGTCCATCATTTTATTTTTGTAACAGATCATAAACC  
ATTGACAAAGATATTATATCTGGAAAAATTTCTTCCGATTCTGTATATCAATAGAATGGCC  
AACATGCTGATCGCATTTCAACTTTGAACTGTTTTCAAATTTCTACTAAGGAAAAACA  
TAAATGCCAACTACTGTTACGAACATCACTGCCTGTGAGTAGAAAAACGATTCATGC

ACTGAACGATCATAGCATAAAAGTAGTACAAAGTGATGAATTTGACAAAAATTTGTGCT  
GCACCAAATTAAGTAGTTGCTTATATGTGCTAATAACATCAGCAAGAAAACGAGGAAC  
GATACAGATCTAAGAAAAATAATCCAATTACTTGAATTAAGTGAAAATTTAAAAAACA  
TGCTTATATAGCACCAAAAAGCTTCAGCAGTAGCATGTTTAGTATATGAGTATCAAGTTAT  
TCCCGATACGCTGCGCAATCATATACTAGCTGAGTTGCATGAAGAACATTTGGGAATTG  
TCAAGATGAAAGGGATGGCAAGATTGTAAGGCCAAATACAAATAATATCGAAAAATAA  
CGGGCATTATTTTCGTCCTTTTTTCAGAAGCTTCGTGTCATCATAACCTATTTTATATCAGG  
CAACCCAAGAATGGATAAATGGATATCTGTAATATTGCCACGACATTCGGAAATCTCCAT  
TACGAGATTAATTACTGAGCTAATGGATCAAACGCTATGCAGATCAGGACAGTGTCAAC  
ACAACACAGACACTGATCAATCATAGGATCAATACATCCACTCTGAACGAAAGTTTCGC  
TTTTATAGATCTTTAAAGCTTACAATGTTTACTACCAAGTTTAAGCAGGCTACATCGGGT  
GCGTCCGCAGCAGAAGTTATGACATCTATGAGTGTCAATGAATGCCAAATAGGTCACC  
ATATTTACGGCCTTGCTCCGACGATTTAGTAGAAATACAGCGGTTTCAACAAACCTGTA  
CATTGCTATACTTATCCAATTACGGAGATAGAAGAGAATGCG

>novel\_circ\_000447

CAGTGACAGTGTCAACGCAATTGTCTATACTGCAGTTATCCGCAGTGCAAACGGATCG  
GTTGAACTGGCTATTTTAAATTTCTTGTCAGAGAGAACTATTTAGCCAATAAGCCAG  
GAAAATTCATCGGAACACTTGCAAGAGCAAACCTTTAAAGCGAATGCAAAGCCTTTGCA  
TGTGCACGAGATATATCATATGCTCTACGTAAAGCTTATACGAGAGAATAATAACAGCA  
TCAAGATTATATGAGAAAGTAGAATGGGCATTTGCAATCCATGTTGACGCAAAGAAAGA  
TGACAACATTCGGATCACAGTGATATGAAAAATAATAGATTATGCTATCACTATATAGTA  
GATGCATATTCTCATTTGTCCGCTGATGAGAAATTCAGTTATGCACTTAAATTAAATACC  
GATATATGATCTGATCATTGATCCAATCAAAGTGTTTATAAAGCAGCAAATATCCCGGCA  
ATCTGGCAGCAACGTATTGAAAAATCATTACAGAGAAAAAGTTGGAAAAAGTATGTATT  
TTTCAACGATATATTTTCAACGCTATAACCTGCGACCATCGTATTGATGCCAAGGGATT  
ACACAAATCGGATAAATATATAGAGGCAATTCGTGATGCACCAAAACCTACTACTGCTG  
AACTATTACAGCTATTCCTGGAGAAAGCAATATATTACAATATCTTCATTCTCAATCTATC  
CACGTTGGATCGATCACTATACACAAATCAATTCATATGGACACTAACTGCAGAAGAGG  
CTTGATGACAATCAAGAATATTTTGATCTCTCAAGTTCTAATGCCATATGATCCGACTCT  
ATTTTTATGACTAGCAACAGATGCAAGTAAGACAGAGCTTGGAAAAATCTTATTATATAT  
ATTCCCTAATGATCAAAAATCCAAGAACCAACGAATCAATTTTTTATGCGATTAAAATAG  
TGTTGAATGAAACAAAGCAACACTCAGATAAACAAGGAAGCATTAGCGATTTGGACAA  
TCCAAAAGTTCTTCTATTATGTTTATGTCCATCATTTTATTTTTGTAACAGATCATAAACC  
ATTGACAAAGATATTATATCTGGAAAAATTTCTTCCGATTCTGTATATCAATAGAATGGCC  
AACATGCTGATCGCATTTCAACTTTGAACTGTTTTCAAATTTCTACTAAGGAAAACA  
TAAATGCCAACTACTGTTACGAACATCACTGCCT

>novel\_circ\_000448

GAGACCTACAGGCAGCAGGCTGAATAATAAAATCTCAGAACATATCTCAGCATCAGTA  
ACACCCCTCCATGTTTGTCTGGAGGAACAAAGAGGACCAGAACTGGGCTCTTGTGAC  
GCCTCGGCTTATAAGCCACAGGCAAAAAAGTTATTTGAAAAGCAGAAAACAAAAGAA  
AGGAGTAGTAAAGAAGAAGTGGAAGTGAATTTGCAATCAAAGCAGGAGATTTG  
AAATTCAGTCAGCCAAGTATGTCCAATACTATCAGTAATATGAAGATGACCAACCGTATT

AAAGGAATGGTGAGCAAACGTCGTAGGCGTTTCACAGAAGATGGTTTTGATCTTGATC  
TCACATACATAAGAGATAATTTAATAGCAATGGGATTTCCAGCTGAAAAGTTAGAAGGA  
GTATATAGAAATCACATAGATGATGTTGTCAAATTGTTGGAATCTAGACATAAAGATCAC  
TATAAAATTTACAATCTATGTTTCAGAAAGATCTTATGATTTTAAAAAATTTAAACAAAGG  
GTAGCTACATATGCGTTTGATGATCATAATCCACCAATGTTGGATCAAATTAGACCATT  
TGTGAAGATGTACATGAATGGCTTTCTCGGCATCAAGAAAATGTAGCTGTAGTTCATTG  
TAAAGCGGGTAAAGGTCTGAACAGGTGTAATGGTGTGTTGTTACCTTCTTCATATTAAC  
AATTTCCCACTGCCACAGAAGCCCTTAATTACTATGGAATAAAAGAACGCACGATAG  
AAAGGGTGTAACAATACCTTCACAGAGGAGGTATGTGGATTATTATGCTACTCTTGAC  
AAGAAGGATTAAATTATCAACCTGTTACATTATTGTTACGGAAAATACAATTGGATCCGG  
CACCCATTTTCCATGGAGGTCAAGGATGTAAGAAAAATAAAATATTCAAAATATATTCA  
AAAAATAAAATACAATTATATATGTTTATATATAATTTTATATTTTAGACTTACATTGTGTA  
ATATCTGAATCTAAAAAGAAGATATTTAGCTCTGAAATAGTAGAAGTACGCAAAGGAAT  
GCATACGATTAGTATTCCTTTAAACACAGTGTAGCATTGACAGGAGATATACGAGTGG  
ATTTCTTTAACAGACCAAAAATGAAACGAAAGGAAAAATTGTTCCATTTTTGGTTCAAT  
ACATTTTTTGTACGGGATTATTTATCGCCAGAATATGATAACGGAGAGTTACCAGTTGAG  
CGTTCAACTAGGGCATTGAGTTGCGATGGTACAACCATGGAATTACCAATGGTTATGTC  
GCATATGAAATCCCGGGCCGGATCGCTGGCTAGTCTCGGACCTATGCCACCTACTCTTG  
TTTTAAGTATAGATAAATGGGGTTTGGATGACGCACATAAAGATAAACATCACAAAGTA  
TATAGTGCTGATTTTAAAGTTAGTTTATTTATGCATCGAATGGGTGGTACTATATCGCAAG  
CTGTATCAGCAACAACAATAGAACAGGAGAGGGTATACAAATAGGAATGGGAGGAC  
AAGACACTCCGAGCGAATCAAGTGAAGCGGACAGCAGTGAATGCGATACGACCGGAG  
ATACAACGGGTGATGAAGATGGGGAATCTG

>novel\_circ\_000449

ACGAATCCGGCGCGCATAAGAAGCGAGGAGCAAAGCGGCGGGGCGGCGGCGGCGTC  
GTCCGGAAGCGAGGAGCAGAGAAGAAGCGGCGTGTTGCGGCGCCGGTCCCGACAC  
CGGTCCCGGTGCACGTGCCCTCGGGCTGACGAGAAAACAGGGGCAAGAGGCCACGT  
TTCCTTTCGGCCAGGTACGCTCGCACTACGGTCCAAAGTGGCTAAGAGCGTAAGTCCT  
CATCGAGTGCACCAGGAGTGCTCGAGCGGAGGGGAGGTGCAGGTACAGGTGCAGCAG  
GAGAGACGAGCACCGAGGCGCATGCCTTACCTGGGGCCTGATATGACAACCCGGCTAT  
CCGCCATGTTTTACACGGTCGAAGTCGGGGACACCAGATTCACTATTCTCAAGCGGTAT  
CAGAATTTGAAGCCGATCGGTTCCGGTGCGCAGGGAATCGTTTGCGCGGCGTACGACA  
CGGTGACAGCGCAGAATGTCGCGATCAAGAACTGTCGAGACCTTTCAAACGTTAC  
GCACGCGAAGAGGGCCTACAGGGAATTCAGCTGATGAAGCTGGTCAATCACAAAAA  
CATAATCGGTTTGTTGAACGCGTTCACGCCACAACGGTCCTTGACGAGTTTCAAGAC  
GTTTACTTAGTGATGGAACCTTATGGACGCGAATCTATGCCAGGTAATCCAGATGGATCT  
GGATCACGAACGTATGTCTTATCTGCTTTATCAAATGCTGTGCGGCATCAAACACTTAC  
ACTCGGCCGGTATCATTCACAGGGATTTAAAGCCGAGCAATATAGTGGTAAAGGCCGA  
CTGTACATTGAAGATTCTCGATTTTGGCCTGGCCAGAACTGCCGGGACCACTTTCATGA  
TGACGCCATACGTTGTGACACGATATTATAGGGCGCCAGAGGTGATCCTCGGGATGGGA  
TACAAGGAGAACGTGGACATTTGGTCGGTCGGGTGCATAATGGGCGAAATGATTCGGG  
GTGGCGTCCTCTTTCCCGGGACGGATCACATCGACCAATGGAACAAGATAATCGAGCA  
ACTGGGAACGCCGGCGCAGGAATTCATGCAGCGGCTCCAGCCTACGGTCAGGAATTAC

GTGGAGAACAGGCCACGGTATCCGGGATATCCGTTTCGACAGGTTATTCCCGGACGTTCT  
GTTTCCATCGGATTCGTTCGGAACACAACAGGTTGAAAGCTAGTCAAGCCAGGGATCTA  
TTGTCGCGCATGCTCGTGATCGACCCCGAACGACGCATCTCCGTCGACGATGCTTTACT  
ACATAATTACATAAACGTGTGGTACGACGAGGGCGAAGTCAATGCC

>novel\_circ\_000450

ATACACGGATCGTTTCCTACAGACATCATCCACGTGGGTTGATCATATACGGGCCTGTAA  
CGGTGTCGAGCATACTGGGTAAACAACAATGCCACCCTGCTTTGGGGTGGTAAGGATAA  
TTCCAACCTTCTCCAAGCTGGATGGTGACGACTCCATTTCGAAACACGTAATTTCGTTGGA  
AGTTCCAGGAATCTTTGACCGCAAATTCGACAAACAATACCGTGATACCGCGATGTCC  
GCTTGTCTCGCCTCATCTCATTGGCCCACTGACTGTTAGCAAATCACCACCGGAGTTGG  
AGGTGATGGAGAAGACGTTACCGAGGTGAAGCCCGGCGGCAAAGGTTGTCCAACAA  
ATTGCACGGCCAGGCATCGAGTAGCCATCATCATTCCGTTTCGCGATCGACCGAAGCAT  
CTCCAAACTTTGCTCTACAATCTTCATCCGATGCTGCTTCGCCAACAGATCGATTATCAA  
ATATTTGTGATCGAGCAGAAAG

>novel\_circ\_000451

CTACAATACAAGATCAAACCTAGTGATTCAAGAAATAAACGCGAGGAAGCTGTTGGTGC  
ATCAATGCGCGAGAGTCAAGGAATTTCTAGTGCATCGAATCGTAGAGATTCTTATGAAG  
ACGAAGATGATGAGGTTTCTGGAAATAGTAGAGATGATAGTAGAGAAAGACGACGTGA  
TAGCAGTTCGGAACGTCGAAGATATGAATACGAACGAAAAAGTGCATATTATGATCGTG  
AACGAGAATATGATGATGATTATTACTATGATCGTCGTCGTGGAGGAGAAAATGATCGA  
ACATATAATACACGCGATGAATTCGATCGTCGAGAAATTCCTTATCGAGAAGATGATCGT  
AAGCATCATAGCCGAGACGATCTTGATAGACATGCAAGAGAAGAAATAGATAGAAGAA  
ACAGAGCTAAAGAAGATATAGATGATAGAGATATTAGAAGAAGACCAGACGACCGTAG  
AAAAGATAGAGTTGATGATGGGATGCGACGTAGAGAAATTAGAGACTATGATTTACGAT  
ATTCTAGAGATCGTGATTATCTTGATCGTGATAGAAGAAGAGACGATAGACGACCAAGA  
CGATATGATGATTATGATATAAGAGATCCATATAGAAGAGAATATTATGATGATCCTTATA  
GTAGAGGATCTAGACCATCCAGTAGATCCTCTTATAATGATAGAGATCGAGAATATTATA  
TGCGAACAAGAGATCCTTATTATCCTTATAATGGATATGGTGTTCCTGGATATGATTATGG  
TGTTCAATTATGCCAATAATTATTATGCATATATTGAAAATTTACGACGTACAAATCCTGCT  
CTCTATTCAGAATGGTATCATAAATATTACGCTAACCAACATCAGCAACAACACATTTCT  
CGTGGTGTGGTAATTATCCAGAAGACAGAGCAAGTGTTCAATTCTGGGCGTAGTTCTTG  
CGACGAAAG

>novel\_circ\_000452

GATGTTGGGTGGCGTGGGAGGCCGGCACATGTCTACGCGTCGGCGTGGCAGCAGCCC  
GCTGGTGCCTGGAGGTGCGGGCCTCACAGGGTATGCCGGACCAGGGGCCTCTGGAAA  
TTCGAACGATGTTGCTGCAATACCACCGGATATGCAGAGATACGCTGGAAGAAGGCGC  
AGAGCGGTTACAACCTAGTGATCACAAGAGCTGCGCCCTTGTGCAGACACGTATTAAAC  
TCGGCGATATCATTCGTTTTTGTAGCGAGCGATCGAAGAGGAAGAGGAAACGGGATAAG  
AAAGAGAATACGGGAGAATTTATCGAGCCAAGGAGGATAAGATCGAGGAAGAGAAGG  
GAAAGAAAGGATATCGAAGAGAGAGAGAAAAAGTGTTTCCCGTCTTTTTTTTTTTTT  
TTTTTTTTTTTTTTTTTCTCCTTCCTTCCTCCTCCTTTCGTTCCCTTCCGTTGTTCCCGT



TGTTCTCGCCGGGGAAACAGAGGAGGGCTACTACTGTGTTGTTGTTGCTACCGTGG  
AGGCGAAGCCTTTCGTCGAGTGTTAGTGTGGTTTCTTAAAGTGGTGCCTCAGCACGAA  
GAGGGAATCGCCAGCAGGGCAGAGGCTCGAACGCATGTAGGAACATGGCCGCAACCA  
GCCCCTGCCTCCCTCTAGAGGCCGCCAACACTACGATGATCATTTCGGCTGGCCGTGGT  
GGTGCTGGGGATCGTTCGATCGGCGTGCACGCGGTGGAGAAAAACGGGACGTGTGGA  
AAAAGGGTTGGCAGCGCAAGAGGCGGCACAAAGGGACCCTGGATACGCGAGTCAGT  
ACAGGAGAAGGCCGAGGTTGGCCGGACTGAGTTTCGGTGACTGGACTAGCTTTGGAG  
GGGAGGTACCTGGTCTGGTGGACATGGCGCCAGGCCGGGATCAGGGCGGAGGGGGCGG  
GTGGGGGTGGGGGAGGCGGCAAGGGCACCACGTCGTTGTTTCATCCTTTCGGAGGATA  
ACTGCATAAGGAAGCATACCCGCTTCATAATCGAGTGGCCGCCCTTCGAGTACGCCGTC  
CTGCTCACCATCATCGCCAATTGCGTGGTCTCGCCCTCGAGGAGCACCTGCCCAAGC  
AGGACAAAACCATACTCGCGCAGAAGCTCGAGGCCACCGAAATCTATTTCTCGGGAT  
CTTCTGCGTCGAGGCGAGCCTCAAGATCCTCGCCCTTGGCTTCGTCCTCCACCGTGGC  
TCCTATTTGCGCAACATCTGGAACATCATGGATTTCTTCGTCGTGGTGACCGG

>novel\_circ\_000453

GATGTTGGGTGGCGTGGGAGGCCGGCACATGTCTACGCGTCGGCGTGGCAGCAGCCC  
GCTGGTGCCTGGAGGTGCGGGCCTCACAGGGTATGCCGGACCAGGGGCCCTTGAAAA  
TTCGAACGATGTTGCTGCAATACCACCGGATATGCAGAGATACGCTGGAAGAAGGCGC  
AGAGCGGTTACAAC TAGTGATCACAAAGAGCTGCGCCCTTGTGCAGACACGTATTAAC  
TCGGCGATATCATTTCGTTTTT GAGCGAGCGATCGAAGAGGAAGAGGAAACGGGATAAG  
AAAGAGAATACGGGAGAATTTATCGAGCCAAGGAGGATAAGATCGAGGAAGAGAAGG  
GAAAGAAAGGATATCGAAGAGAGAGAGAAAAAGTGTTTCCCCGTCTTTTTTTTTTTT  
TTTTTTTTTTTTTTTTTCTCTCCTTCCTTCCTCCTCTTTTCGTTCCCTTCCGTTGTTCCCCGT  
TGTTCTCGCCGGGGAAACAGAGGAGGGCTACTACTGTGTTGTTGTTGCTACCGTGG  
AGGCGAAGCCTTTCGTCGAGTGTTAGTGTGGTTTCTTAAAGTGGTGCCTCAGCACGAA  
GAGGGAATCGCCAGCAGGGCAGAGGCTCGAACGCATGTAGGAACATGGCCGCAACCA  
GCCCCTGCCTCCCTCTAGAGGCCGCCAACACTACGATGATCATTTCGGCTGGCCGTGGT  
GGTGCTGGGGATCGTTCGATCGGCGTGCACGCGGTGGAGAAAAACGGGACGTGTGGA  
AAAAGGGTTGGCAGCGCAAGAGGCGGCACAAAGGGACCCTGGATACGCGAGTCAGT  
ACAGGAGAAGGCCGAGGTTGGCCGGACTGAGTTTCGGTGACTGGACTAGCTTTGGAG  
GGGAGGTACCTGGTCTGGTGGACATGGCGCCAGGCCGGGATCAGGGCGGAGGGGGCGG  
GTGGGGGTGGGGGAGGCGGCAAGGGCACCACGTCGTTGTTTCATCCTTTCGGAGGATA  
ACTGCATAAGGAAGCATACCCGCTTCATAATCGAGTGGCCGCCCTTCGAGTACGCCGTC  
CTGCTCACCATCATCGCCAATTGCGTGGTCTCGCCCTCGAGGAGCACCTGCCCAAGC  
AGGACAAAACCATACTCGCGCAGAAGCTCGAGGCCACCGAAATCTATTTCTCGGGAT  
CTTCTGCGTCGAGGCGAGCCTCAAGATCCTCGCCCTTGGCTTCGTCCTCCACCGTGGC  
TCCTATTTGCGCAACATCTGGAACATCATGGATTTCTTCGTCGTGGTGACCGGGTCGAT  
GACCGTGTTTCGCCGAAACAAACGTGGACGTCGACCTGCGTATGCTACGTTCTTCAGG  
GTCCTCAGACCGCTAAAGCTGGTTTTCGAAAATTCCAAGTTCATCACGGCGTTCTCGCA  
AGGCATAGAACTGGATATGGATCTGCGCACGTTGCGTGCGATACGCGTGTTGCGACCG  
CTCAAACCTGTCTCCGGCATAACCGAGTCTCCAGGTGGTGCTCAAGTCTATTATCAAGGC  
AATGGCGCCGCTTCTGCAGATCGGCCTGCTGGTACTTTTCGCCATCGTGATATTCGCCAT  
CATCGGCCTCGAATTCTATTCGGGGACCCTGCATAAAACGTGTTACAGCATTAGGGATA

TCAATGTAATCGTGAAGGAGGGCGAACAGGCGAGCCCGTGTAACACGGACAACAAAT  
CCGAGGCGCCATTCGGGGCCCACGTGTGCGACGCGAACATCTCGACGTGCATGGATCA  
CTGGGAGGGACCAAACCTTCGGCATCACCAGCTTCGACAACATCGGATTCGCCATGCTC  
ACTGTCTTCCAGTGCATCACTATGGAGGGCTGGACTGCCATATTGTACTGG

>novel\_circ\_000454

GATGTTGGGTGGCGTGGGAGGCCGGCACATGTCTACGCGTCGGCGTGGCAGCAGCCC  
GCTGGTGCCTGGAGGTGCGGGCCTCACAGGGTATGCCGGACCAGGGGCTCTGGAAA  
TTCGAACGATGTTGCTGCAATACCACCGGATATGCAGAGATACGCTGGAAGAAGGCGC  
AGAGCGGTTACAAC TAGTGATCACAAGAGCTGCGCCCTTGTGCAGACACGTATTAAAC  
TCGGCGATATCATTCGTTTTTTGAGCGAGCGATCGAAGAGGAAGAGGAAACGGGATAAG  
AAAGAGAATACGGGAGAATTTATCGAGCCAAGGAGGATAAGATCGAGGAAGAGAAGG  
GAAAGAAAGGATATCGAAGAGAGAGAGAAAAAGTGTTTCCCCGTCTTTTTTTTTTTTT  
TTTTTTTTTTTTTTTTTCTCTCCTTCCTTCCTCCTCTTTTCGTTCCCTTCCGTTGTTCCCCGT  
TGTTCTCGCCGGGGAAACAGAGGAGGGCTACTACTGTGTTGTTGTTTCGCCTACCGTGG  
AGGCGAAGCCTTTTCGTCGAGTGTTAGTGTTGTTTCTTAAAGTGGTGCCTCAGCACGAA  
GAGGGAATCGCCAGCAGGGCAGAGGCTCGAACGCATGTAGGAACATGGCCGCAACCA  
CCCCCTGCCTCCCTCTAGAGGCCGCCAACACTACGATGATCATTCGGCTGGCCGTGGT  
GGTGCTGGGGATCGTTTCGATCGGCGTGCACGCGGTGGAGAAAAACGGGACGTGTGGA  
AAAAGGGTTGGCAGCGCAAGAGGCGGCACAAAGGGACCCTGGATACGCGAGTCAGT  
ACAGGAGAAGGCCGAGGTTGGCCGGACTGAGTTTCGGTGACTGGACTAGCTTTGGAG  
GGGAGGTACCTGGTCTGGTGGACATGGCGCCAGGCCGGGATCAGGGCGGAGGGGGCGG  
GTGGGGGTGGGGGAGGCGGCAAGGGCACACGTCGTTGTTTCATCCTTTTCGGAGGATA  
ACTGCATAAGGAAGCATACCCGCTTCATAATCGAGTGGCCGCCCTTCGAGTACGCCGTC  
CTGCTCACCATCATCGCCAATTGCGTGGTCTCTGCCCTCGAGGAGCACCTGCCCAAGC  
AGGACAAAACCATACTCGCGCAGAAGCTCGAGGCCACCGAAATCTATTTCTCGGGAT  
CTTCTGCGTCGAGGCGAGCCTCAAGATCCTCGCCCTTGGCTTCGTCCTCCACCGTGGC  
TCCTATTTGCGCAACATCTGGAACATCATGGATTTCTTCGTCGTGGTGACCGGGTCGAT  
GACCGTGTTTCGCCGAAACAAACGTGGACGTCGACCTGCGTATGCTACGTTCTTCAGG  
GTCCTCAGACCGCTAAAGCTGGTTTCGAAAATTCCAAGTTCATCACGGCGTTCTCGCA  
AGGCATAGAACTGGATATGGATCTGCGCACGTTGCGTGCGATACGCGTGTTGCGACCG  
CTCAAACCTGTCTCCGGCATAACCGAGTCTCCAGGTGGTGCTCAAGTCTATTATCAAGGC  
AATGGCGCCGCTTCTGCAGATCGGCCTGCTGGTACTTTTCGCCATCGTGATATTCGCCAT  
CATCGGCCCTCGAATTCTATTCGGGGACCCTGCATAAAACGTGTTACAGCATTAGGGATA  
TCAATGTAATCGTGAAGGAGGGCGAACAGGCGAGCCCGTGTAACACGGACAACAAAT  
CCGAGGCGCCATTCGGGGCCCACGTGTGCGACGCGAACATCTCGACGTGCATGGATCA  
CTGGGAGGGACCAAACCTTCGGCATCACCAGCTTCGACAACATCGGATTCGCCATGCTC  
ACTGTCTTCCAGTGCATCACTATGGAGGGCTGGACTGCCATATTGTACTGGACAAACGA  
CGCTCTTGGCAGCACGTACAACCTGGATTTACTTTATACCATTGATCGTCCTTGGCTCATT  
CTTCATGCTGAACCTAGTTCTCGGTGTTCTGAGCGGGGAGTTTTCGAACGAAAGAACA  
CGCGTCGAGAGGCGGGCGGCTTATCAGAAAGCAAAGAGAAAGCGTCTATTCACGACT  
GCGTTCAGTGCCTACTTAAAGTGGATCACTCAAGCAGAGAGTTTGCGAAGGAGAGAG  
AAAAGGTGGAGAACCGGCAGTCCTTCCTCAAATTGCGAAGACAGCAGCAGCTCGAGC  
ATGAACTGTACTGTTACCTGAATTGGATCTGCAAAGCAGAGGAGGTAATACTCGCGGA

AGAAAGGACCACAGAAGAGGAGAAGAAGCACATATTAGAAGGAAGAAAAAGAGCCG  
AGGCGAAGAAGAAGAAGCTCGGCAAGAGCAAAAGTACGGACACGGAGGAAGAGGA  
AGGCGATGACGACCAGGACGACGGTGAGTTGCTTTTCGAGATCCTCCTCGACGAAAG  
AGAAGGGACCTTGCAAGCAGTTCTGGCTGGCCGAGAAAAGATTCAAGGTACTGGATAC  
GAAAATCCGTGAAATCGCAAAAATTCTACTGGTTCGTATCGTTCTCGTGTTCTTCAAC  
ACCGTCTGCGTAGCTGTGGAGCATTACGGTCAGCCCCAATGGCTGACCGACTTCCTCTA  
CTTCGCAGAGTTCTGTGTTCTGGCTCTGTTCATGTTGGAGATGTTTCATCAAGGTGTACG  
CGCTCGGCCCTCGCACATACTTCGACTCGAGCTTCAATCGTTTCGACTGCGTGGTGTCATC  
TCGGGATCGATCTTCGAAGTGATCTGGTCCGAGGTGAAGTCCGGCTCTTTCGGCCTCTC  
CGTCCTACGTGCCCTTAGACTCCTGCGAATTTTAAAGGTCACCAAATACTGGAAGAGCC  
TGAGAAACCTCGTAATATCGCTGCTCAGCTCGATGCGTAGCATCATCTCCCTGCTCTTCC  
TGCTCTTCCTCTTCATTCTCATATTCGCGCTGCTCGGTATGCAGCTGTTTCGGCGGCCAAT  
TCAACTTCGATTCAAGGCACGCCGCCACCAACTTCAACACCTTTCCCATCGCGCTGCTC  
ACTGTCTTCCAAATCCTGACCGGAGAAGATTGGAACGAAGTGATGTACCAGGGTATAG  
AATCGCAAGGTGGTCACAAGAAGGGCATGATCTACTCGCTCTACTTCATCGTGCTGGT  
GCTGTTTCGGCAACTACACACTGCTGAACGTGTTCTTGGCCATCGCCGTCGACAATCTG  
GCAAACGCACAAGAGCTGAGCGCCGCCGAGAACGAGGAGGAAGAGGAGGACAAGC  
AGAAGCAGGCGCAGGAGATCGAGAAAGAGATCCAATCCCTGCAGAATCCGAAAGACG  
GTGGCGCGCCAAAGGTAGAAATCTGCCCTCCGAGTCCGAACCAGAATTTCAAAGACG  
GTAAAGGTGGGAAACAGTCATCCGAAGAAGAGAAAAAGCAGGATGAAGACGATGAC  
ACGGGACCAAAACCAATGCTGCCATACTCCTCCATGTTTATACTGTCCCCTACGAATCC  
AGTAAGAAGAGCCGCCATTGGGTCTGCAACCTGAGGTACTTCGACTTCTTCATAATG  
GTGGTGATATCGCTGTGAGTATCGCGTTGGCCGCCGAAGATCCCGTATGGGAGGACTC  
GCCGAGGAACGAAGTTCTCAATTACTTCGATTACGCGTTTACAGGTGTCTTCACCGTC  
GAGATGATACTGAAGATAATCGATCTCGGTATCATACTTCATCCGGGCTCGTATCTGCGC  
GAGTTCTGGAACATTATGGACGCGGTTGTTGTGATATGCGCCGCTGTTTCGTTTCGCCTT  
CGACATGACGGGCAGCTCGGCCGGGCAGAACCTTTCCACGATCAAGTCGTTGAGGGT  
GCTCCGCGTGTTGAGGCCGTTAAAGACGATCAAGAGGGTGCCGAAGTTGAAGGCGGT  
TTTCGACTGCGTGGTGAACAGTCTTAAAAATGTCATCAACATTCTCATAGTGATACATATT  
GTTCCAATTCATATTCGCTGTGATCGCGGTGCAGCTGTTCAACGGCAAGTTCTTCTACT  
GCAGCGACGAGAGCAAATATACGCAACAGGATTGCCAGGGTCAATATTTTCGTTTTTCGA  
GGACGGCGCCCTGTTGCCAGAGCCAAAGAAACGCGAATGGCAGTCGCAGTTTTTTTCA  
CTACGACAACGTGATGGCCGCCATGCTTACGCTGTTTCGCGGTACAGACTGGCGAGGGT  
TGGCCCCAAATCCTGCAGAATTCTATGGCGGCCACGTACGAGGACAAGGGCCCCATAC  
AGAATTTTCGTATAGAGATGTCCATTTTCTACATCGTCTACTTCATCGTATTTCCATTCTT  
CTTCGTCAACATCTTCGTGGCCTTGATTATCATCACTTTCCAGGAGCAGGGAGAGGCCG  
AGTTGCAAGACGGCGAAATCGACAAAAATCAGAAATCTTGCATAGACTTCACGATACA  
AGCTCGCCCTCTGGAAGGTACATGCCGAAAGAGCGGAACAGCGTAAAGTACAAAAT  
CTGGAGAATAGTGGTATCGACGCCTTTCGAATATTTTATCATGGGTCTCATCGTATTAAA  
CACAGTACTGCTCATGATGAAG

>novel\_circ\_000457

TTGTGTTTTTCCGCATCATCTGGTATACGATATACGTCCGCGAGTGTTGTGTGAACAAAT  
TCACTCTTGCGACGGAAACAAAAAAGAAGGAAAGAAACGGCGACGAATAATATTCTT

AGTGCTGTAGTCTACAGTTGATGGATGAACTAGCAGAATGCTGCAACACGGAGGATC  
AGGTGTGGGTCTGATGGGAGGAAATCAGGGTCAGGGAGCCCCAAAATACTGCCGGATAT  
GGTAGTATGGGACCTGTGGATGGAAGTCAACACAAGGTCCAGATCAGGCTGTTGAGG  
CTAGAAAACAGGATATCAGTGAAATTTTGCAACAAATTATGAACATCACCGATCAAAGC  
TTGGACGAGGCACAAGCGAGAAAACATACTTTAACTGTCATAGAATGAAGCCAGCCC  
TGTTTTTCAGTTTTGTGTGAAATTAAAGAGAAAACAGTGCTATCTTTAAGAAATACTCAG  
GAAGAGGAACCGCCGGATCCCCAATTAATGAGGTTGGATAACATGTTGATCGCGGAGG  
GTGTTGCTGGACCGGAAAAGGGTGGTGGTGGTGGAGCGGCGGCCTCTGCAGCGGCTG  
CAGCCGCTGCTGGAGGACCACCTGGACAACCTGACAATGCGATCGAACATTCGGATTA  
CAGAGCCAAGCTTGCCCCAATTAGACAGATTTATCATCAGGAGTTGGAGAAATACGAG  
CAGGCGTGTAACGAGTTCACAACTCACGTAATGAATTTATTGAGGGAACAAAGTCGTA  
CCAGGCCAATCACGCCAAAAGAAATCGAGAGGATGGTTCAGATTATTCATAAGAAGTT  
CTCCAGCATTCAAATGCAACTGAAACAGTCTACCTGTGAGGCTGTGATGATTTTGAGG  
AGTCGATTCCTCGATGCAAGGCGTAAAGACGAACTTTAGCAAACAAGCCTCTGAAA  
TTCTCAACGAGTATTTCTATTACATCTGAGTAATCCATATCCAAGCGAAGAAGCTAAA  
GAAGAACTCGCACGAAAATGTGGAATCACCGTGAGTCAGGTTTCTAATTGGTTCGGCA  
ACAAGAGGATACGCTACAAGAAAAATATAGGTAAAGCACAGGAGGAGGCGAACTTGT  
ACGCAGCCAAAAAGGCAGCTGATTCTTGAGAAAAGAATGAAGAAAGAAAAATTCCAT  
GGATATACCCACTGAAAATTCTTCGCATTTCGCACAACTTGCAATTACGCGTACTTTTCTT  
AACTACACCGACGTCTCTTTATTTTAGAGGGCAAGGCGAGATATTTTAACTTACTAATT  
ATACTGAGAAAGAGGGAGCGAAAAATGAGAAGACGAGGATGAGGATACATGGGAAG  
GGCGATGAGATTCTCGCGTTTCTTTGACACCTTCCCTGTGTTTGTCTTTCCTTAGCAAT  
GCTCTTTCTGGTAATAACGCAGTCTTCTCGTAATTAAAGAAACGGAATTCCAACGATAG  
TGGCGCTAACACTTTGGCGAATTCCTCGATATTTTGTTCAAATAGCGAGAATGTTTTCA  
CGTTTCAAAGTAAAAATTGCTCCTATTATGCTGGCACATAACTAAGCTAATTTCCACTGA  
TATTGTTTCGTGTACTTTGAATAATTTGAAAGTTGATTAAAAATTCGCTTTCACCGATA  
ATTCGTTCATTTTCTGCGGTACAGATTGAAGATGATCCAATGATACATTTGTGATTTGA  
TTGATCAGTGGCGTCTGTAATCAAAAATTTTACACTTTTATACATTATTAAGTCTTTCTG  
GAAAAATTTTCTTTTGATCATGTTGCAATTAATGACGATATTGCACAGCTTTTGCAGGA  
GCGTCGCCGTACAGTATGGGCGGTGCCAGCCAAGGCACCCCGACGCCGATGATGTCCG  
CGGCGCCACCTGGTGGCCCGCAAGATATGGCCGATACGGGATGGGCATAAACGGTAG  
CGATTATGGCTCGCAACCGTACAACGACGGCTCGATGGGCTACGACCCTATGCACCAG

>novel\_circ\_000460

TCTCGACGACGAGGATGGCGTGCACGAATAATTGCCGTTTCTGAGCATCGAATAAAGG  
ATCGAAGGAGGTGACGCCCCGTGTGAGAAAGCGAGACAGAGTGAGCAGGGATGTCGCT  
GAAGCTTCGAACAAGATCCGCCAGCCGGCTTCAAGTGTTTCAGCTTCGTCGCTCGAAA  
TTGACCAACCTCTAAAACGAATCTAAACGAATAAATATACATATATATACATAATATATA  
TATATATATATGTATATATATATATATTATATATATATATAAAAGAAAATCGTTTGACGATTCG  
ATAGAAGAGAAAGGAGGAAACGGGAGAAAAAGAGAGGAGAGGATCGTGGAAGTACC  
TTTTTTTTTTTTTTTATTTTTCGTTAGCAGAATAGAATAAAAGATATTTTGGTAAAAAGAGT  
AATTAGTGAAAATAATAGCAGAGGCGCGAGACATAGTTGCTGCTCCCCGCGAAAGAGC  
CAGAGTTAAATGGTCGCATTTAGTGCACAATTTCCGCTTTGCTCGCGTGTGCGCCCCC  
GTGTACCGTGCACCACGTTCTCCGCAAGAAATCGCCGAGGATTTTCAATGAGATGGCC

TTCATGATGAAGAAGAAGAAGTACAAATTCTCGGTGGAGGTGGACCTCGAGGAGCTC  
ACCGCGGTGCCATTCGTGAACGCAGTGCTGTTCCGAAGCTCAGACTCCTCGACGGTG  
GATCCTTCGTTCGATCATTCGACCAG

>novel\_circ\_000461

AAATCCTTCCAGTGGTTCGGGTCTCAGCGAAACAGGATCTCTGGATCGAGCAAAAGCC  
GCGCTGGAGCGCAGAAAAAAGGCCGAGGATGGAACCGGAAATTCGATTTTGTGCAGA  
GTTGAAGTGACGAGGCCAAATCCGGATTCCCTGATCGATGAGCTAATCAAAGCAACGA  
ATTTGGAGCAAACCTGATCTCGAGAGTTCTGAGACTACTGGACTTCAGCTGTTTCATTGCG  
AAAGACGGGACGACCGCGCTCGGCAGCCACGAGATCAAAAGTCAGATGCCCCGCGGGT  
GTGTTCAAGCAGGTGGTAATGGAAGAGAATAATAGGTAACACGAAGCTATCGGGACGA  
GAAGACAGTACGCAAGACAAGTCAGCGCCACGTTCTCGTTGGCCCTGGTGCCAGAGC  
TCGTCTACGAGGCCTACGAGCCCCGCTAGTTCACGAGATCAACGATGCTGGACGAGGG  
AATCGTCGAGAAAAGACG

>novel\_circ\_000462

CTACTGGACTTCAGCTGTTTCATTGCGAAAGACGGGACGACCGCGCTCGGCAGCCACG  
AGATCAAAAGTCAGATGCCCCGCGGGTGTGTTCAAGCAGGTGGTAATGGAAGAGAATAA  
TAGGTAACACGAAGCTATCGGGACGAGAAGACAGTACGCAAGACAAGTCAGCGCCAC  
GTTCTCGTTGGCCCTGGTGCCAGAGCTCGTCTACGAGGCCTACGAGCCCCGCTAGTTC  
ACGAGATCAACGATGCTGGACGAGGGAATCGTCGAGAAAAGACGGTGAACACGGCG  
ACGAAACGCGAACGCCATCTTTCATCTCTCAAAAAAGGAAAAAAAAAAAAAAAAAAAA  
GAAAAAAAAAAGAAAAAAAAAAATCCTCCCTAATCTAAAATTATCCTTTTTTCGGTTGCCTA  
TAACTGTCTTTCCGGCGTTTCGGTGCTTCACGCTTCTCGTACAATGGATCGTCGATTTAA  
ACGCTCAAAAACGCTGCTAAATGTTTCTTTTATATATATACATATATATATATATATCAAA  
TTATGGGAAGCAGTCTTCGTTGAATCGTGACACGCATATATTTTAAAGAGGGGGAACCG  
TCGATTTCTAGGATGATTCTGTGGCAACGAGATGCAACATACGCACCGAAACGCTTCGT  
TAAGAAAGAAGAAGAAATTTGTACAGAGCGCTTCGAAAGAGAG

>novel\_circ\_000463

AAATCTGTATCGAATTCTAATAGCAGAATAAAAGAGTTCATCTCGGGAGGAGACAGAG  
GAAGAAGACTAGAAGATCAAACAAATTTTCGTCTTATCTCTCTCTTGTTCCTGTCAGTAT  
TGTCTTTGCCAAAGACCGCATCGAATCTGATTTTTTCCATTATTTTTCTTCCATCTTCAA  
GAATTATATTATTTTGTGTTTGTATGTAATTGCTCGCTAATCCAACGATATTTCGTCGCTGAAG  
AAACTGGAACAGCCGTTGTCCATAAGTAGTGATCAGACCTTGCCAACTCGTTCTTGTA  
TCGAAACATGTGTCAGTCACGCTCTTAAGCCACGTATTGTCCAAATATCATATCTTTAGC  
TTGTGCGGTGGAAAGTGCCCGCAGAAGGGTTGAAAAGAATAGAAATTTTCTCTATAAA  
TCGATCATACTATGGAGAAAAAATCTTGCTGATTAATGAATCGAATTCGATAAAGTTGA  
TCTGAATATTATTTCTTGATTAAAGAGTTCGCTCTTGAGGATAATAACGAGTTCAACGAG  
TGAACGAATGTGCAAAGCAATAGAGTGGGAGAATGAACGATTGGCAGCTTTGGACATG  
GGATAGATGATAGATCGCAAATAATGGGGTGGTAAAGTGAACAAGAAGTGCAAAATGG  
ATTGGGTGCCTCGGCTCAGGTAGCCAGAGACGACAAAGTCGCGGGCACCAGGGCGAA  
CGAGCCCCGAGCTGCTAGCAAAGCTTTTTCTTTCTCTGTCTATCTTTTGTTCAGAAA  
AAAAAAGATATCGCATGGACGTCATTGATGGGCGTATTTTTCTGAAAGACTGTTTTTTAT

TTTTTGTCAATTTACCGATCAGTGTTATGGAAAAAAAAAAAAAAAAAGACTGAACGTGATAAT  
CAATAAATCAACCAAGGAATTAATTCGCAAGCTTTATCATTGTCCGGTGAAACGTATTGG  
AGGGAAGATTGAACTGATTAATCGATGCAACAGATCCCGGATTTATTCTAAGAAGGAG  
AAGAACTTGATACGAATTTACACGTGATCTTCGATCCAACAGAACGCTCGCGTCTGA  
CTCACAAAAAGACTGAAGAACATATGTTGATTCAATTTGTGCGAAAAATATTTGCATATCG  
CGTTCTGTAGAATATATACTGGCTTTTCATTTGTTGCGTCACACGTACATATCTTTCGGGAT  
CTCATGTAATTGTTATACATACACACGTGCATGTACACATACAGCTTGTCATACCAGCTAT  
ACGAGCTTTTGTAGAAATTTCTGACGAACATATACACAAAAACATTATACGCGTGTCTGTAA  
CACGCTTTTTTCGACTATTATATATACTGCAAATATATTACGTACATGTACATGCGTATAGA  
AATAATATATATATACATATATATACATATATAAAATACAAAAAATATATATATATGTATATGT  
ATCTATGTACATGTAAAAAATCTCTTTCGCTGCCTAATAGAAGTATTCGTGGATAAAGTG  
GCGCATATAATACGGTAAAGGATTAACCTCCCTATTGATATATTTGTCCTTTTTTCTATGA  
AAAGAATAATTTCTTTGTGCCAGAAGATATTTTTTAATTTCAAAGAAGGTATGTTTCTTC  
ATTTTTTGTTTTTTCTAACGAAACACGTATTGAGAATAACGCGTGCAACGAAAACTAAT  
AAAGAAAAGTACTCAGAGTAGTGAGAAGTGTAGTAGTTGAAGTGTGATCGTTGCACG  
GGCTCGCAACAGATCAGGATGGGTTGTGGACAGAGCAAAATCGGCAATATCTATCCAA  
AAAACAAGAAGAACAACAAACACTGGCAAGAAAAACGGAGATTCTATCG

>novel\_circ\_000464

AAATATAGTGTGTGGATACTGTGTTTGTATAGATGTACAGCCGCGTGCAATCATACACAC  
GTATGCACGTGTTGTGTACAAATGTGTGTTTGTATATATGTGTACCTCTCCCTGAGCTCG  
CTCTTTAAACTTTTTTAACATCTTTATCATTTCCGCACTATCATATTTTTTT

>novel\_circ\_000465

TGGACACGAGGGAAGTTCAGCCACACGATGCGAGCGAGAAGGAACAACCTGGGCCTG  
GCCAGCGTTAAAGCGGAACCAGGATCGACCGGTACGACGACGACCAGCACGGGGACA  
CGTCTGCTGCACGGTATTCTCTCGCAGCATCCCCAGCAGCACGGTCTAGGGGTGCAAA  
ATGGATACGGCCGCCACTTGCCCGGCCACGCTCAAATGGGCCAACCGTCCTACACCAC  
TGCCACCATGGCCACCACAAGCACGCCAGGAAGCGGATCACTGCCAGCGAGCCCCGC  
GGACAGCGGAGTCAGCGACGTGGAGTCCAGCACGTCTCTCGGGCGGTAACGAGGACGC  
GAATCTCTTATTGAAAGCAAGGCTCAATCCCAATTCGTCCCTTCAGCCAAGCCTGGCGT  
CTCATCATTCTCATTTGTGTCGTCAGCAGCGCTCGGCAGGTCTGGCCTGTCACAGTCCTGGT  
GTTTATCCGTCGACGGCGGGCTTCCTGCCGCCCTCCTATCATCCTCATCAGCATCATCCC  
TCCCAGTACCATCCGCATAGAGGGAGCTCGCCTCACCATCAACACGGGAACCACACGA  
TGGGTCCCACCATGGGACCGCCCCATCATCATCACCATCATCAAACGCAGAGTCTACAA  
CACTTGCAATTATCGTCAGCCTCCTACAT

>novel\_circ\_000466

TGGACACGAGGGAAGTTCAGCCACACGATGCGAGCGAGAAGGAACAACCTGGGCCTG  
GCCAGCGTTAAAGCGGAACCAGGATCGACCGGTACGACGACGACCAGCACGGGGACA  
CGTCTGCTGCACGGTATTCTCTCGCAGCATCCCCAGCAGCACGGTCTAGGGGTGCAAA  
ATGGATACGGCCGCCACTTGCCCGGCCACGCTCAAATGGGCCAACCGTCCTACACCAC  
TGCCACCATGGCCACCACAAGCACGCCAGGAAGCGGATCACTGCCAGCGAGCCCCGC  
GGACAGCGGAGTCAGCGACGTGGAGTCCAGCACGTCTCTCGGGCGGTAACGAGGACGC

GAATCTCTTATTGAAAGCAAGGCTCAATCCCAATTCGTCCCTTCAGCCAAGCCTGGCGT  
CTCATCATTCTCATTTGTCGTCAG

>novel\_circ\_000467

GGGAATCAAAGTAGCGAGTAAATCGAAAGAAAGAAATCTGAGGAGCAGAAAAAGAA  
GGAGGCGAAAAGTGGGGACGTTTCAAAGGTGGTTTTGGATGTTAGAAAGCGCGGGGG  
TGGCTAGAGAGGCCCCGCCGCAGGGTACGGGTCCCGATGCCGGTCCCCGTATCGCAAA  
CCCTTACGCTGACCTCCACCCTCGTGCCCAAGGAGGAGTCAAACATGCCCTTCATAGA  
CGACGAGCTTCTTTGGTGCCCTGACAATGACGGCAAAATGGTTCGACTTAACGCAATGT  
CTCCAGGGTTTATCGTTTTATCAGGAAAGCAGTACAGGGCAGTCGGTAGAATTTTCCCC  
GATGGAATTGAATGCCCTTGTAAGGACGCCGGCTGCTCCAAATATGCCGGCAGAAGAG  
GGCGAAGGAATGGCTGGTGTACAGGGGAAGAGCCCTTTGACACGTTGGACACATTC  
CTTCGAGAATTGCAAGCTGATTTGGCTGAAGCCAGTCAACCCACGTCCACTACAACCTT  
CCGTAACCTCCTTCTGTAGACGGCAGAGGTACAATATCGCAGCCGCAAATCCTTTGTTA  
GCAGAGAAATTGGCAGCTCCTTCGTGCAAGCATCTCCAACCTTCTATTCCGTACGCAAC  
AAGGGCGGAAATTAAAACGGAGAGTATTCAGCCTGAAACAACGAAAG

>novel\_circ\_000469

AGTGGAAGCTCAGCGTTGCAGTTGGTGTACCCGCTGGATTCTCGTCCGGTGCAGCTA  
ATCTTCCGGGGGTTGCAGGTGGTCAAGGAGAAACGATCCCTCCTCCGGGATGTCTCGG  
GCGTTGTAAACCCGGCGAACTTTTGCCGTCATGGGCCCCTCAGGTTGCGGCAAAAC  
GACGTTATTGAACTGCCTGTCAGGCCGCGTGGGCTTGGACGGGGGTGAAATCTGGCTG  
AATCGTGAAAGGTTGACAAAAAGATGGCGCAGAAGAATCTGTTACGTGCAACAGCAG  
GACGTTTTCTTTCCCGATCTCACGTTACGACAGACACTCGAG

>novel\_circ\_000471

GACGTGGCGGCACGAGGATTGGACTTGCCAAAAGTGGACTGCGTGATTCAATACACG  
GGGCCGACGTCGGCCAGGATTACGTGCATCGAATCGGTAGAACAGCGCGAGCTGGC  
TCTTCCGGTTCAGCGACTATCCTTTTAACACCGCCAGAAATTGAATTCGTACGAATGCT  
CGAGTCTAGGCGTATCAGAATCAGGCAGGAGAGCATGGACGACGTTCTGGATAGGCTG  
ATGGGCCCCTTGTCCAAGCATTATCCGCTCATAACGCGGCTGTCGCGTTGCAGAACGA  
TTTCGAGAATTTGATACTCGAGGACACGAAGCTACGCGAGAGAGCGTGCAAAGCGTAC  
ACGTCTTGATACGTTTCTACTCGAGCTACCCTCGCGACATGCGGCAGATTTTCAATCG  
GAGGGACCTGCACTTGGGCCACTACGCGAAAAGCTTCGCGCTCAGGGAGACCCCCCA  
ACGAATCGGCGGGATAGGGAGGAGACTGCACGAGAAGGAATGCACGAGGAAGCGGC  
AGTTGAACGACAACAGGTTGACGGGAAGCGGGAA

>novel\_circ\_000473

TGTCGATAGTATTTCCATGAATTCTACGATTACTATCGAAGATACCGACGAAGAGGTGAT  
TGATTTGGACTCGAGCCAAGATGCCATCAATGTTACTGACAATGATCAAAGTGAATATT  
CGATTGAAAAAAATTCATTATCGAACAACAATGCGAAGAAGACGAATATAATTAGTGAT  
TATGTGGATAATAATAAGAATACATCTATGAGAGTAACATGTGATAGCGCAAGTACATCA  
AAACCACTTTTGAAGGTTATATTTTCGAGATGAAAGTATTTACGGCAATATAAAAAA  
AATTAAAGAATTTCTAGAAGAATTAGAATCTTGCAAAATTAGATGTCAAGAAAATGATA

ATGGTTTAACATTAGAAGTTTGGGATAATGACACTGATTCTATAAGTCAGTCTATTGAAA  
TTACTACAGAAAGTGAAGATAGTCAAGATATAATATGTGATACATTATTTACTGTAGATA  
AACAAACCAAACTTAAAGATGATTTTGATGTTCCAACCTTATGGAAAG

>novel\_circ\_000474

ACGCATCAATGACGAGTCTGTCTGCCACGGTGTCCCAGAGGGATCTCAGAATAGGTGA  
CAGGGTAATAGTATCATCCAGCCAAGGCAGCAAAACCGGTGTCCTCAGGTACTACGGT  
ACAACAGAGTTTGCAGTCGGTGAATGGTGTGGAGTGGAATTGGATGATCCTATTGGAA  
AAAACGATGGTTCCGTCAACGATAAAAGGTACTTCGAGTGTGACCCAAATACGGTCT  
GTTTGCACCCGCGCACAAAGGTCAGTCGGTCACCAACCAGCAAAAGGTCATCATGTATG  
GTGCACAGGCCGACAGGCGCCGCTTAAACACGTCCCTAAGGAAGACCGGTTCCAGA  
GAGTCATTGGTCTCAATCTCAAGCATAGTCAGCACCACCAGTACAGCTACTAGAACTG  
GTGTTAGTGCCGCGAGG

>novel\_circ\_000475

ATGTCGGAGTTCCCAGTGGAGGGAGGAGAAAACGGTGACATGCACACTGTCATGGAG  
AATTTTCAAAAGAAGAACATGGTGACCGGAAGGAGCCATGTTACTCATCATCCACAGG  
TCACTTCGTCATCACAGATGCTGACGACGAACCAGAGCCAGAGCAGCAGCAGTTCGA  
GCAGGGTGGCCACCAAATCCTCGCAGAGGATTCTTACCTCGTCCTCGTCGAGTGAGAT  
GAAAGCAAGCTCAATGAAGAGCGACCTAAGAGAACTTCAACGCGGCATATCCGAGAT  
GAAGAACAATATTTTCGACGAATTTTTCACAACGACTGCGCAGCAGCATGGAAAACCTC  
GTGGACAGGGACACGAATGGATCGGAGGAAGCCGATCTGACGGAGCCCTTGGTCACG  
TTTCCGGATCCGGATACGCCGCCACCAGCCACAGGGACAGGAGGATCACCTCCCAAT  
TGACCTCCCTGAACTCGTTGAACAATCTTCACACCATGAGCCCACAGATCAACATGTC  
GAACATTTTGAACATGACGAACCTTCCTGCTGGACAGGAAACGATGAAGTTCGAGCA  
GAAGAAGATGACAAGCGCGTCCAAGACCAAGGTCGTCACGGACGGATTTCAGCGCCGA  
GAAAGCGACGGCGAACAGCGCCGAGATGAGAGCTTTACAGACTGGCGACGTCTCGTA  
CAAGGAGCAAAGCGCCGCGACGGCGGCCAGGGCCCGCGTCGAACTCGATGGCGTCTC  
CGCCGAGAAAAGCGTGGCCGCTGCAAGG

>novel\_circ\_000476

ATGTCGGAGTTCCCAGTGGAGGGAGGAGAAAACGGTGACATGCACACTGTCATGGAG  
AATTTTCAAAAGAAGAACATGGTGACCGGAAGGAGCCATGTTACTCATCATCCACAGG  
TCACTTCGTCATCACAGATGCTGACGACGAACCAGAGCCAGAGCAGCAGCAGTTCGA  
GCAGGGTGGCCACCAAATCCTCGCAGAGGATTCTTACCTCGTCCTCGTCGAGTGAGAT  
GAAAGCAAGCTCAATGAAGAGCGACCTAAGAGAACTTCAACGCGGCATATCCGAGAT  
GAAGAACAATATTTTCGACGAATTTTTCACAACGACTGCGCAGCAGCATGGAAAACCTC  
GTGGACAGGGACACGAATGGATCGGAGGAAGCCGATCTGACGGAGCCCTTGGTCACG  
TTTCCGGATCCGGATACGCCGCCACCAGCCACAGGGACAGGAGGATCACCTCCCAAT  
TGACCTCCCTGAACTCGTTGAACAATCTTCACACCATGAGCCCACAGATCAACATGTC  
GAACATTTTGAACATGACGAACCTTCCTGCTGGACAGGAAACGATGAAGTTCGAGCA  
GAAGAAGATGACAAGCGCGTCCAAGACCAAG

>novel\_circ\_000477



ATCTGCGACTTCGGTTTGGCCCCGAGTGGAAGAACCGGATCAGAACAAGCACATGACC  
CAGGAAGTGGTGACGCAGTATTATCGCGCGCCGGAGATCCTAATGGGGGCGCGACACT  
ACACGGCCGCGAGTGGACGTTTGGAGCGTCGGTTGCATATTCGGCGAACTTCTTCGTCG  
AAGGATCCTTTTCCAGGCACAGAGCCCTGTGCAACAGCTGGAAGTATCACAGAATTG  
CTGGGCACGCCAACCCTCGAGGACATGAGGTTTCGCGTGCGAGGGTGCGAGATCCCAC  
ATGCTGAGGCGCGCGCCGAAGCCACCCTCGTTGACGGCACTCTACACCCTTAGCAGCC  
AGGCGACGCACGAGGCCGTCCATTTGCTCTGCCAGATGCTAGTCTTCGATCCTGACAA  
GAGGATCACGGTGGTGGATGCACTGGCGCATCCCTATCTGGACGAAGGGAGACTGAGA  
TATCACTCGTGATGTGCACGTGCTGTTACACGACCAGCGGCGGTTTGAGACAGTACA  
CGGGTGATTTTCGAGCCGGCCACGTTCGCATCCGTTTCGACGATCTTTGGGAACGGAAGCT  
CACCCTGTGCAGCAGGTGAAAGAGGAAATGCACAAATTTATAGCGGAACAGCTGAA  
CACGTCGCGCGTGCCGCTCTGCATAAATCCGCAGTCCGCGGCGTTCAAGAGCTTTGCA  
AG

>novel\_circ\_000478

ATCTGCGACTTCGGTTTGGCCCCGAGTGGAAGAACCGGATCAGAACAAGCACATGACC  
CAGGAAGTGGTGACGCAGTATTATCGCGCGCCGGAGATCCTAATGGGGGCGCGACACT  
ACACGGCCGCGAGTGGACGTTTGGAGCGTCGGTTGCATATTCGGCGAACTTCTTCGTCG  
AAGGATCCTTTTCCAGGCACAGAGCCCTGTGCAACAGCTGGAAGTATCACAGAATTG  
CTGGGCACGCCAACCCTCGAGGACATGAGGTTTCGCGTGCGAGGGTGCGAGATCCCAC  
ATGCTGAGGCGCGCGCCGAAGCCACCCTCGTTGACGGCACTCTACACCCTTAGCAGCC  
AGGCGACGCACGAGGCCGTCCATTTGCTCTGCCAGATGCTAGTCTTCGATCCTGACAA  
GAGGATCACGGTGGTGGATGCACTGGCGCATCCCTATCTGGACGAAGGGAGACTGAGA  
TATCACTCGTGATGTGCACGTGCTGTTACACGACCAGCGGCGGTTTGAGACAGTACA  
CGGGTGATTTTCGAGCCGGCCACGTTCGCATCCGTTTCGACGATCTTTGGGAACGGAAGCT  
CACCCTGTGCAGCAGGTGAAAG

>novel\_circ\_000479

GCCTCAAGTACCTTCACTCAGCCAGAATCTTGACACAGGGATATTAAGCCGGGCAATTTA  
CTCGTGAACAGCAATTGCGTGCTGAAGATCTGCGACTTCGGTTTGGCCCCGAGTGGAAG  
AACCGGATCAGAACAAGCACATGACCCAGGAAGTGGTGACGCAGTATTATCGCGCGCC  
GGAGATCCTAATGGGGGCGCGACACTACACGGCCGCGAGTGGACGTTTGGAGCGTCGG  
TTGCATATTCGGCGAACTTCTTCGTCGAAGGATCCTTTTCCAGGCACAGAGCCCTGTGC  
AACAGCTGGAAGTATCACAGAATTGCTGGGCACGCCAACCCTCGAGGACATGAGGT  
TCGCGTGCGAGGGTGCGAGATCCCACATGCTGAGGCGCGCGCCGAAGCCACCCTCGT  
TGACGGCACTCTACACCCTTAGCAGCCAGGCGACGCACGAGGCCGTCCATTTGCTCTG  
CCAGATGCTAGTCTTCGATCCT

>novel\_circ\_000481

CCAGAGACAGTTCCTCAAGCGAGGATCGATATGACCCGTGTGTTAGAGGTTGCTGCTG  
CCGAGGATATAACCGGACATCCGTACAGCCTGGCGATCACCTCGCCGGAAGGAGTTAC  
CTTCGTGAAGGGCACGTGCCGCGAGGAAACCAGATGGTGGGCCGATGTGCTTCAAGT  
CTACTCGAGGAACAAGGGCCGGCATAAGAGGAATGCGACGTTCCCCGGTGGACAGAC  
CACCATTCTTCAGGTCACTCCTACGATCAGAAGTAACACGCCGAATCCACCTCGACCA

CGGTTCAACAGCTGCCGTTTCAGAGCCCCGCAGCAACACATGGATCTCGGAAACGAGC  
GTCCCCGCAGACCTTTGCGCGTCTGTCTTCTCCTCCACGCCGTCTCTGGTGACCAACA  
GCGTGTTAACGACGACCAGCAACACGTGCGATGAGCAACGGGAACGCGGTGGAGAAC  
AGCAACGACCATCGTGTACCCGCCAACGTGTACCCCTGAGAACCAGCACGCCACTT  
GAGAACGGTGGCTCCACCTACGTAACCTCCGTTCCATCCACCTCGACCATGAACGGGA  
GCGTGTCCAGCACCGTGTACACGACCGTGACCACGTGACCACGACCACCGTGGTGT  
CGTCCGTCTCCAACCTCGTTGACGGAGAAGCCACCGATCGTGCCCCCAACGAGGGTAG  
ATCGAGCTACAAGGATCAACCGGCTAGCAGCGCCTCCCCCCCAGCCAGAGACAAGCTT  
CGAGCGGAAGACAAGGCCAGACGCAGGATGAATCAGCACGGAGAACGAACCGGGAC  
CGCCTGCTCTGGCGAGAACTAG

>novel\_circ\_000482

GGCCGGCATAAGAGGAATGCGACGTTCCCCGGTGGACAGACCACCATTCTTCAGGTCA  
CTCCTACGATCAGAAGTAACACGCCGAATCCACCTCGACCACGGTTCAACAGCTGCCG  
TTCAGAGCCCCGCAGCAACACATGGATCTCGGAAACGAGCGTCCCCGCAGACCTTTGC  
GCGTCTGTCTTCTCCTCCACGCCGTCTCTGGTGACCAACAGCGTGGTAACGACGACCA  
GCAACACGTGCGATGAGCAACGGGAACGCGGTGGAGAACAGCAACGACCATCGTGTCA  
CCGCCAACGTGTACCCCTGAGAACCAGCACGCCACTTGAGAACGGTGGCTCCACCT  
ACGTAACCTCCGTTCCATCCACCTCGACCATGAACGGGAGCGTGTCCAGCACCGTGTA  
CACGACCGTGACCACGTGACCACGACCACCGTGGTGTCTGTCCTCCAACTCGTTG  
ACGGAGAAGCCACCGATCGTGCCCCCAACGAGGGTAGATCGAGCTACAAGGATCAA  
CCGGCTAGCAGCGCCTCCCCCCCAGCCAGAGACAAGCTTCGAGCGGAAGACAAGGCC  
AGACGCAGGATGAATCAGCACGGAGAACGAACCGGGACCGCTGCTCTGGCGAGAA  
ACTAG

>novel\_circ\_000484

TCGGAGGTGTTTCAGGCAGCAGTGGCGGCCGCGGCAGCAGCGGCCGCGGGAGGCGG  
TGGCCAGCAACCCGCCCCACACCCGCCGGCAACGAGAGCAACCCCGAGGGCGCCGT  
CGAGGGCAGCGCCCTGGTACCTGTCACTTCAGGTGCAACCACACCTGCCACCGCAAC  
ACAGGGTACAGACCTGAAAGGTCAACCGAAACGCCTTCACGTCAGCAATATACCTTTC  
CGTTCCGAGACCCTGATCTCAGGGCAATGTTTGGGCAATTCGGGCCGATCCTCGACG  
TGGAATCATATTTAACGAAAGAGGAAGCAAG

>novel\_circ\_000485AGAGTCGTTCTACGCGCGACACAGCGACAGACGAGAGTCGAGGCG  
CGTGCGGGAAACACGTAGTAGAGATCGGATAGTACGGTGTAGAGAACGAGCGAGAAA  
TAGAAAAATATATATATATGTGTGGAAGGCTAGTAAACGAGATACCTATATAACCGATG  
GTTAACGGACGGAATATTGAGAGAGCGAGCAAACGAGATAAGAAAAAAAAAAAAAAG  
AAAAAGAAACGAGAAAGAAAGAGAGTATGAGAGAAAATTGTTGAAAGAATTTTGAG  
GGCAAGTAACGGCGGGCGAGTGAAGGGACACTGAAGATGCCGGTCGAAAAAACGAT  
CCCAGAAGTGTCCGAAAAGGTAAGGAAACCAGAAAACCATAAGCATCGAGAAAAAG  
CGAAATAAATAGTCGAGAAAACTCTTGACGAGAGCGACGAGAGAGAGATGTCGTCTC  
GCAATGCCCCGCTCTCTACCCCGATCGAAATACACACGGGAGTCGCACGAACGAATTT  
TTTTCATCGTACGCGTACAAATTATATCGGCGATTAAACCACGTTATGTTCTGTTTATTCGT  
TTATTATTCGGCGGATTATATTGGCGTGGAATGGGAGGGGGAATTTTTTCTCTTTCTTTT

TTTTTTTTTTTTTTTTTCGGGCGGATTTCGTGCCCCGAGCTTCTCGCGATTTTTTGCGAACG  
ATTATGCGCTATGGAGTGTGTTTATCGTAATGGCCGCCAGATGGCGACCGATGGCCACT  
CGCCTCGGATAATCTGATTAAAAGTTTTTTGGGAAAAAAGTTAGTTAGCGGGGAATTGG  
CAACACGTTGCAGCAATAAAAAGTGGCAAAAAGCTTTTAGCTTCGTAAAAGATCAAA  
CCTTGCTCCCTGTAATTGCATAAAAATCAATGTTAAAATCAATGGGTAAACTGTGCCCCG  
AGGTAGCCATATTGGAACAAAACGTGGAATAGAACGTAGAGCGGGTAATATGATCAAA  
TTTAAAATTGAGAAAGGGAATAAAAACGAAATTAAATTTCTGTATCCTTCAACGAACGA  
GTTGTAAACTGTCTAATATTATTAATACTGTCGATTCTGTTGGTCGATCGTTGCTGAAGAG  
GGCAGCACGATGGATTAAATTTCCAATTGTTTCGTTTTTACTTCGATCGGATATCAGATTG  
TTACGAATGTTTCTCGATGCGTTCTCTCGTTTTTTTTTTTTTTTTTTTTTCTTTTTTCACC  
AGCGAATCACGTGGAAAATAGATCCGCGAAAATAAAAAGGGATTACGTTCGAACGGAG  
AAATTCGTCATTAAATTTACCTGTCAGGAAGCAAGCCAGAATCTAGCGTAACGAAAAA  
CTCGGAACGACTATTTAATCTCCATTTTCTCTCTTCCATTCGATTCTGCTCTTTTTCTAT  
CTTCTCTCTCTCAAAAAAAAAAAAAAAAAAAAAAAAAAGAAAAAGAAACGAACCGTT  
CGAACGTCGTCTGATAAATCGTCCGACAGCCAAAAAATTGGCAACGTTTCGAAAACCT  
CTCGTAGCTCTGGCACGACAAACATTTGCACGGATTTTTTTTTGCTGCGTATTCTCGTAA  
CTACCCCTCCATGTTCCACGCTCGTACGATTAATTTTCGAAATATTCAAAAAAAAAAAG  
AAAAGGAAAGAAAAGAAGAACATTATTTTTCTTTTCTTTTTTTTTTCTCTTTTTTTT  
TTCTTTTTTTTTTCCAATTTGCTTCCCGGTTCCACGCGACATTACGGATTTTAAATCCTTA  
AGCTAAATAAGTTATGGACGGACGTTTCGCACGAGTACTTTCGAAGCTGGTGTAATTATT  
CGAAACGAAATATATACATATATATACATATATACACACGCGAATTTAAAGCGTGAATT  
TTAATCATTAATTTAACGATTTTATAGATATTAAATTCAGGAAATTTTCGCGATAGGAAAC  
ATGGTGGATTTCATAAGTGGCACGAAATGAGAGAGGTAAAATTTGACGTGCCGCCGCG  
ACTAATGGTGTCGAAGAAAATGGCGGGGAAAATCAGTGGTGAGGATGAAAATGTCCG  
AGCGGAATAGAGCGCGTCAAATTAACCTTAACAAGTTTTAATGCCCAATTACGGAGTTA  
CACCTACCTGGCTGGCTCTTATTTCTGTTGCCGTAATAAGCCACGGTAATTGAAATTTAC  
GAGCGTGTTTTACGCGGGCCGGTTCGTAAACAGGGAAAAAGCGGTGTCCAGCCAACG  
TTTGAGACGCGCTAATTCGACGAAGTAAGACGAATGAATTTTAAATTTTCTCGTAACAC  
TCGTGTATATATATATTCTGCCACCTATGCGTTTAAACCTTTCTATATTTTTCTTCCGATA  
AATTATTGGCAATGAAAATTTACTTTAGAACTCTTTACGATGCGAGTAAAATGTCCAA  
AAATATTACATGCGCATTTTTTTCAAACACTTTAATTAATAATGGGTAATAAATTTACCTTA  
GGAATTTGATAAATTCAGGGGAAAATGTACGTTTACTATTTCGTTCTTGCTGTTTATAT  
CGCATTTTATTCTCAAAAAATTTAATTGATCAGAAAATATTGACAACAAAATTTCAATTT  
TTCGCTCTCCCTTAAAACTGTTCAATTCCAATTTTTTTTTATTGAAAAATAATACGATAAA  
AAGATTGCTTTATTTTTCGTATCATCGTAAAAACCATTACCGATTAAACGATATCCTTCTA  
CCAAAAGGTAAATAAACCGTGCGGGAAGAGGGGGAGAGAACTCTGCAATTTACCCC  
GATTTACGAAAAGGTACAACCTTCGTTAAAAAAAAAAAAAAAAAGAGGAGAAAGATCTCCA  
CGTATCCCCATCAAACAAATATAAACCCAGTCGAGTAATTTCAACTTTTCCGGCAAATT  
AAAAACCTCCATTAACAAAATCACTGAGATGTCCGCCGCCAAACGAGGGTCAAATTCC  
AACCCCTTGCGAATTACATTCGCTCCAGGGATCCGGCAAAGCTTCGACGTGGAGCCTC  
TAACGAGAAGTTAAAGACCGAAATGGCCGAGGGTTAAAGGGAGGAGGACGCCGAGCT  
CGCATTGAAAAGGCGAGAGTCCAACGATGATCTCTCCCTCCCCTCCCTTTTTTTCCACC  
AGTGCGAGCTTTTTAATTACCGGAAGGATTAAGGGAGATTTCAAATTAGAACCGAGTTT  
TTTTTTGTCTTGCGAGAAAAGAAAAGAAAAGGAGAGAAAAAAGAAGAAAAAGAAA

AAGAAGAAGAAGAAGGGGGATAAAATGTTAATCCGCAAGCCGAACCTCGACTTGAGAA  
TCTGACGATTCGTGCGAAAGTTTATCCGGATACCGGTTCTCTTTCAAAAGGGAACACGT  
GTTCTCTCTGTAATTACGTGCGCGAAGAAAGATATATCGTGGGATGAGGAAGGGAGGA  
GGGAGTCCCTGTCAGACCAAAAAAAAAAAAAAGGAAAAAACCGTTGCAACGCATCGATG  
TCGAACGAATATCGCCTCGTTTTATTGGCCTCCTGCTTGCCAACCGGAGATTATATCGGT  
TTCCGGAAAAAGAGGTTTTGTTTCGGGCTGTTTCGATTGTGACTTCGATGATTAAAGTTG  
GAAACGGTGGACGATTATTCGGATGAAAGAGGAATGGAGAAATTGGAATGGATGGGGT  
TTTATGATTTCTCTAAATTTGAAATTTAGAGTATCATTTGGCAATATTTGGACGGGCAGTA  
TTGAAATAATTAACAGAAATGATAATTTCTTAAAATTATAACTTTTTGGAATTAAC  
AATCAAGAGGATTATTTCTCTCAAATTTAAAATTTGCAACAGTGAGAAATAAATCAAAG  
GTAGAAGAGATTAACTGAAGAGGTTTGTAAATTCCTTCCTTCCCAAAAAATTATAATAA  
CCAGAGACGAAACAATCCATTTTCGAAACGTTTTGAATACCCTCGAATCGCTTGGATCC  
ATGGATTAAAATAAACCATTTGAGATTAACTGAAGAGCGAGCAATTTGACTGAGATAC  
ACCACAGCTCGTGAAAATTCGATCATCGAAATTATATCGCGGCCATCCAAACCAAGTGC  
CACCTTGAGGAGCCACTCTTGCAATTTTATCCTCCAACAACAGTGTTTTCCAGCTGG  
AACATTTTCGGTCAAATATTTTGCCGGCTGCTCAAACATTATCTTTTCGTATTTACCCGG  
TGATCCCGCGACCACAGTCTTCTTCGCCAACGAGCAGAAGAGAGAGAGAGAGAGA  
ATCCAACCGACGCTAATAACGCCGCTTAATTACCCTCGAACCAGGCCAAGAGGATCG  
AGGGAATTTCTTGGGAGACCCGTGTTCCACGTAAATCGTATATCTCGATCCTAATCGA  
AGAAATTACACGTTATACAACCCGGGGATTGGGGATATCGAATCAATTCTAATACAAAC  
GTATCCCAACTTCGTTCCCAATCTCTCTAATTATCCAGCTTGTTGGGATAGAAGGATAAC  
TGGAGATAGGAGATTGCAATGAAAGGGAATCCTTCCTCGAAAGAAGTGTTGGAGAGG  
GATCAAAACGTCATCCAAAACGTTTATTTTTATTTCTGGATGGAAAGTAACTTGACAA  
GATTCAAGAATTCTTTTTTAAAAATACTCGAAAGAGAGGAGGATAACCGCCGAGATAGA  
AAAGATGCGAAAAGTTCGAAATTTTTTAGAGAAGCAAGGAGAATGGAAGAATTCTTTA  
CTTTTTTCGATAAGGAATTTTCGATTTGTTCCCGATAAGATCCAGAGTCAATCTTCCAATGA  
TATTTAATAAATCTCTATTTAATAACGCGACACACCTTCTCCACGACGGAAATACGATC  
TTTCTTCGAACGATATTCAATAGATTCCGTTTCGATACCGTTCCGGAAACTGACCAAAGA  
ACTAGCTTCTACTACCATTTCTCTCTCTCTTTTTCTATACACAATCGACACACTCGTCG  
GATCTCTTTTCCTCAAATTCGACGGATCCTTTCAACTCAGAATCGTGGTCAGAATCAGT  
TCCTCTTTCTTCAGCCCCTCCAAAGAAATGTCGCGAAAAAGAAGGGATCCCTCCTTGA  
AACGACGCTCGATAGAAGTTTCGGGGCGAAGTTCGATCTTTGCTCACCTTGGTAAACGA  
GTGAAAACACAATGCTCGATGACTACAAAGGCCGTTTCGTTAAGATAATGGGCCAGTGA  
ATGGGGAGGGGTGTCGCGAGGGCCGCGCTCGCGTTTCGACCCTCCCCCTCCTTCCCTTC  
CACCTCGTTCGCCGTTTCGTTCAAAGCTCCATTCATTGGGGAGGGGAGGGGAGGGGAAG  
GGGGGAGTTTAACTGGTTTAAAGACCGGCGGTAGTTAGCGAGCGGCCCGATACTCTT  
CGATTATCGAAGGTCTTTTCGGCCTCGTTAGCGGGCTTCAATTTTGCACGCTCCCGCTGC  
GCGAGCATTGTTGATCGCCCCCTCTAAAGAGGAGGGGGGGGGGAAGGGTGGCGACGAA  
AGGGTTTGTGCGGAGATCGAAGGTGGTGGCAAGGCTCTCCCTTCATTCCTTTTTTCT  
TTCTCTCTCTCGAGAATGAGATTTTTTTTTTCGATAATTTTTCTTCGGACGTTCTTTTTTT  
TCATAGTCGTATTTTGAATCGAAAAAGGAGTTTCTTTTTTTTTTCGAAGAAGTTTTTC  
GAAAGGAAAGTATCTATTTTCGAAACATTTAGAAACGATAGAACGATTCAGTTTTTCGAT  
GGACGTTTCGAGGGAAACTGGGTATTTCGTGCGAAACTCTCGCGTGAACTTTTAGATAA  
TCTGTGATATTGATTCGGCAACTTTTGCGCCGAATTTCAAATTCAATGCTTTTCGTAAGG

GTCAACATTTGTCTTTCGTCACCTTGCAATGTGGAATTTCCACACTGAAAATAATATCACC  
AGCGAGATATCGAAATCGGTCTCCGAATAATTTGGAGGAAGGATATTTCTGTCGTTACG  
AATCATTCGAAATCGTGTGATACGAATAACGTCGAAAGGATTGAAGAACAGAGAAAC  
AGAGATAATTATTTTACACGGACAAATTAATCCTCCCAAGAAGATTCTCGTAGAGAGAA  
AGAATCGTGTTCCTTCGCTCGATTGATCAAAAGAAAGATTGACAAACCTCCACTTGAT  
GGTTAATTAACACCAGTGAAGAAAAAATAAATCAAAAGAGGGAAAGAGGTAATAAAA  
TTCCAAATTAACCTTCGCTCTAATTATCCCTCGATTTCGCGAGAAAACCTCTTCAAGTATACC  
TTTAACGCTTTTTCAATTCAATTTAAAATCGAAGAAGATAATAATGACGTATCGATGAGT  
AGAAAAAGTATTTGTGAAACGTCAAAAGATGTAATGAAATTCAAAAACCATTATATATA  
TATGTTATACATTTTATTCATGTGGAAAGCTGGCTATCTGAAAACTCTTCTACGTTTCTT  
GATAGAAAACCCATAACGTTACCATCCATCCACCACTCTTCTCCTCATAGAATAAAAAA  
TCCTCGTGCATTACGTCACCTCGTTGACGCGTTGGAATACGTTAAATACGATGGCAAAT  
AACGTCACGTTGGGAAAAAAAAGGAAACGCATTTACACATCCCCTATAGAACTATAGA  
AACGCCACATCCAACCTCCGCAACCACCCACGATTGCTTATTCCAACGAATTCCTCCAA  
ACGCTTCGATTCCACCCTTGGACATCCGAAAAGCCATCATCCGTTGATGAAAATTCGCC  
CACACACCTCCTACCTCCCCCTCTCTCGAATCAATAGCCAAACCGTGGCAAGAGGACCA  
GGTGAAAAGGGTAGCAGGCCACTACGCGAAGGTGAGCGAAGGACGAAAACAAACTC  
TTGTTCCGGCGGAACCGTGGCATTCCGGAAAGCAGGAAGTACGACCCAGTGGTGTGCG  
TCGTAGCTCATGCACGACCTGCACGTCGGTGCATAACGACAGGTGGCTCGAATTTTGC  
AGCCTTAGCAAGTCAAATTTATGCAGATGCCGGGAGGGGGGAGGAACAAGGTTGCC  
GAAGCTGTGTGACGTTTGTCCGGCCAACATCTTGTACCATCACGCGACCGCCATCTTAT  
CGATATCGTCGATATGCGGAATATAGACAGAATTCTCGAGGATTCGAGGAGTGGCGGCC  
ATTAATTCGAGCGAGCGTCTCTTTTATTCTTCTGTTTCTTCTTTGTGCCCTTCGATGAATC  
GAGACTTGGATTCCCTCTTTTTTTTCGTGAAGTACAGAAGAGGTATTTTCGAGAAAACG  
AAAAATCGGAAGATATCTGACAGTAATCGGTCCAATATTGTTAGACTTGTTAGATCAAA  
GGTTAATATTCTCGCGAGATATTCTCAATAAAATAGTTCTCTCTCTTCGTTTTTGAAAGA  
GAAAGGTGTTTAAATTAACGAGAAATCTTTGGATCGATCCACGTGCTTCCAACAG  
GAGAATATCGTGAACAAGCGTTATAAATTATACAGCGAGGACGGCGAAGCTAATGAAA  
ATGATCAATCCATACGATCCATTTCGACCTATGCCCTTTTCCCCAATTAAAAAGTAGATTC  
CCTCCAATATCGATCGCGTCGAATAAGCCTCCTCTCAAACAACACGTATCCGCTTATTTT  
GAATAATCCCGTTGAATCGAAAGATTCTATACACGCAATCCCCGTCGAGAAGAGGGGA  
GGGGATGTGTGTCATTCAGGGTAGAAGGGCAGTCACGCGTAGATCGAAAAATCGATGG  
CCGAGCTGCGTTCCAGGCCAAATCTTAACGAGCCACAATTTACAATGGGCCAAGATTT  
ACTTACTTCCTGCATTTCAATTCAGATCGCGGTGATACGCCCGGATCGGCCGGAATCG  
TGGATCGTTCGTGTCGGCCACCGTTCGTGTCACGAACTTGCGGTATGTGCCGTCTATT  
ATCCTCTCCTTTCCCCTCTCCGCGACATCCCTCTTCCCTCCATTTACGTCGAGACACGAT  
TATTTCTTTCTCTTTTTTCTCTTCTTCGCAATTACACTCGAAGAGATACCGCCGTGCA  
GAGGCAGGCCAGCGTGGCTTCGATGTCAATCGAAGATTACAATGGTTCCCCTTAATCG  
GATCGATATCGTCGTCCAACGGCTCTGTCCACGAAATTGAATCGAGAATCTGCTCGAGA  
GTTAATAGCGGATAAAGGCTTGACTATCCGGGGCCCCGCTAGTTGATAGTTAGGGGGAG  
TCTTTGCGGAGGGTGTGGAAGGGGAAGAGGGGAGGGAAGAGTCGATGATCGAGGAG  
GAGGATGGCTCTGACCCTGGTCGACGTCGTTTTATCTGTTCGGCAAACGAGGCGCTGAT  
GGATTTATTGGTGTGTTGCACGCGAAATAGAGGTAAGCCTGGGCCGACGATAGAGATAA  
TATTGTAACAACCGCGGAACAGGTTCTGTATCTGATAGGGGGGAAATCGGCGGCGATA

GATGAATGGATTTGGCTTTGACGCAGATTTCTGCCGAGATTTCAATAGATTTTCGTTGGA  
ATTCGATTACGTGTAAGGATTGGAGAGAGAGAAAAGAATTCGAATGCGTTAAGAATTCTT  
CTTCGTTCCGTGAAAAGATTGGTTAAAAATTAGAGGGGGATAGATTTTCGTTTTCTCTG  
AATGAATCTGCAATAAGCCAGGGTTTGAGTTTAGGATTATATCGAAATTTTGTGTGACG  
AAGGATATCTAAGGAACGTGTAAATTTTATTATCGTGATCATTGTTTATTATTATTAGTA  
TTTGCAAGGAAGAATTCACAAAACCTATGTAATACAATTTTAATTCTAATGATATTTTCGCG  
AGATAAGTCTGTGTTATGGGGGAATTAATAAGGATCTAATAAACAACTTGGATCACAT  
ACACGCGCGCGCGGAATAAAGTAAGATTGTACCTTCTTCCGTGGCAAATCTGGACCGC  
GATAAATCACGTTACGTTAAGTCCGGTGCCAGGAGAGATCTAAGCTGCAGTATACCAG  
GCTCTGCTCTAACTTATGGCAGATCGGGTAACTTGGTTCCACGGAAAATTCGATTCACG  
GTAAATCGAATTAACTGTTCGATGCAGGGAAAAATGAAGTAGAAAAAATTCCAAATTG  
TGCCAGACACAGTTTTTCGAATGCTCGAAGTATTACGTATTTGATCAGCGTTACCATTTTT  
GTATAATTTTTTTAACCGAATTTAGATTCATTTGCATTAATATCGGAGCGCCATTTCGTA  
TTTTGTTTCAACAATAATTCTATAAAAAGAATTTTTTAAACATTTTCGTTTTTCTCTCGCG  
ATAAGAAAAAATAATAATTTCTATACTTTGAAAAATGATATTTATTATCTTTAATAA  
ATCGTGATAAATAAATGATATTTATACTATTTCGAATAAATTGAAAAACATTATTCGAA  
ACGCGTCAAAGTGTTTAAATTATTGAACGAAATGAATGATTAATATCGAATGAAAAA  
AAAAATATATATTTCTCTTTTGATAGAATACTTGAAACGTATATTATTAATAAATTAACG  
TCCCTCCTTTTGTATTTTAATGCCGTTTTCCGAAACCAATTATATTATAAAATAAATAA  
ATCGATTAAAAAATATCTTTCTCCTCGCATACCGAAATTTTCAAATTTACATCATACCT  
TCTCTTTCTCTCTTCTATATATGTATATATATATATATATATATATATATATATATATT  
AATATAGAGTAATTATACACGCGATTTCGATCGAAGAACAATGGCCAAACACACTTGTCC  
CAATTTCTAAACCGAAGTGGTTCTTCAAATTTGATCCGTTGCCAGAAAATCGCGAGA  
ATTCAAATGAACCTCACTCGAGTTTTTAACATCAAAGTTCAAGGGCCCGTTTCGATGGAA  
ATTTTCGATAAGCTTGACGACGAGAAAATTCCACCCTCCTCCTCCTCCTCGTACCTCC  
CACCAATTTTAATCATCCAACGACCATCTCCTTCCTCTCTCTCGATCTTTCTCTTAATTC  
AATCTCGATCGTGAAGATAACGAGGGAGCGAAGATAATAAAATCAAATCGGAGCAAC  
AAAGAAGAAACAATCGGGAGTCGTACGCGTGGACGGTCTAATTTGCAAAACAATCGG  
ATTTACAGAACGTACGCAGCCGGGGTGTGGACACGATACACGTATGGCAAACAAAGA  
TTTCGAGGTTTCATCCGTGCTCGCATTGTTTGCCGTGCAACAAGGCGGGCGCGGGCATC  
GATTCTGACAACGCGGTAGACGCCTCGATGTCCGCCACGGTTTGTTTGCTCGTTTGT  
GCGTATCCCGCTCGTTCAATTTTACCTAACAATAAGATCCGACAGTTTAGTGTTTGCCTT  
TCATTTACACGCGATGAATATTTCCCCGTGTTGGTCCTCGCCCCCTGGAGGTGAGATTG  
ATTTATTCGATGATGAATTTTCTCGTCTATGATCCTTGTCCTCGTGATATTAGGGAATAGT  
AATCGATAATTTAACGATCGGGTGGGTCCAAAAGTTTTTCGCCCAATTTCTGTAACGCG  
ATCGTGTTATGTATTAATGAACAAGATAGAGTTTCGTGCGTGAAAACTTTCAATATTTAT  
CCAATATTTGAACTTTGTGTTGGTGTAGAAATTTTAAATACGATGAATTGATAGATGA  
GGAAAGTTGAAATTGTCTATTGTGAAAAGGAGGAAAGTCTGTCGTTAATTATTATTCGT  
TAATTTCTGGTAACGACGAAATTTAACGTGTATCTTCGAAAGAAATATTTATATTTAATTG  
TCGTATATTTTTTTACTTTTAAAGTAAAAAATCCCCGCTAATAGGATTAAATTCTACGA  
GAACGATGCTTTATGAATAATAATTGTAGCGATCTTCTTTTTTTCTTTTTTTATGAATCT  
AAAAATAATTGAAATTGAAATTTTAAATCTCTTTCCTTCGGGTTTTTGCACGGGTACA  
AAATTTTTTCCAGCCATTTTAATATTTAACGCGAACGAAATAATAACATGGCGAAATTT  
TCGCCGTGTATATAACGGGTTGATGTTCCACCCGATATTTAATATTCACAGGTGAATAAA

AGATTATGATACGAGCCGCGAAACTTTGTCGCAGAATATAAAGGATCTTGCCCCTGACG  
GGCAACATTTTCTACTTGCTAAACGTTCCACGTCGATATTTAATATTCATGAGCGTATGA  
AACACGTATAACTCTAAAAACGTCGAAACTTCTCCGTGAAGCGAGACGTTGATACACC  
AAAATCGGATCGTTGATCAATATTCATAACCAGCGTGCGAGCGATGGTTTCTAATACAA  
ATTGCGAGAATCTAATATAAATTTTGAATAAAATTTAATGCTGAACTTGGAATAATAATAT  
AACCGATATAACAATACGTAAATAAAAAAGAAGTTTGAAAAATTTACTTCCCCTTCTTCA  
CAATTACACAAATAATAAAAAATTTCTTAGAGAGAACGTATAACGTTGCTAATTAATAATTT  
CCTTGATAATTTTAGACTTCCCCAAATTTTATCCGCAAAAAAATTCAAGAGGAATTCAC  
ACTTTTTCTAAAGGACAAGAGAATTGAATATAAATTTTCTCGAAGGGGAAGTTGCTCG  
TCTAATTAACCAGTTTATCACGTGCATCGAGCGAGATCTAACTTCTAGTCGGTTGAATTG  
AACACGATTGCTCGTTACGAGAAGGCGACGTTTCGTTTAATCCGATCATAACTATATAAC  
GCGGCGAACAACCCCTCGATCGATGGGAACACGATCGTAAAATGCAAATCGGTCGAT  
AACGCGGGCCGGGATTGGCCGGCCGTATCCTCTCGCGACAAACAAATACCGGGTGGCG  
TAGATAAACCGCACGTTTCGAGATAGGATGCCGGTTGTTGGATATCGAGGTTGTAGGAGT  
ATCGAGAATGGCGAAAAATACGGGGATATTGTTTCGATTATATTGAGCGAAAGATTTTTT  
TTTTTTTTTGTAGATAACAATTTGAAAGTGTTGGACGAGAGTATTGGAAATTGGGAA  
TTGGGGATCGAATTGATAAATGAAGAATGGAAGAGTTTAAATATTTCTCGAATTGTTGA  
AATAAAAAAGTGTTGGGGATACGTGTATTATGGATTGGTTAATAAAGATTTTTGTCTCGA  
GAAATTCTATTTTTAGGTTTTGCTTTTTCTTACTGGATTCTGAAATTCTGAAGAAAAAGT  
AGATTAAAATTGTAGATCGAATCTCGCTTAATTTAATTACAGAATAACACGAAGATAATG  
GGAAACGGAAAATAATGGGAACGGATGATAAGCATAAGCGTGGCAGAAATACAGAAAT  
ATTTAAAAATCGGAGGATAAAATATGCAAATAAGGGAATGATGAATCGGTCACAATCTG  
GATAAGAATCACGGCCAATTAAAATGGTAAATCGGTATATCCGTAAAGTTGGCCGGAAT  
TAAATCGATAAATCGAGAGATTATAAAATTATCATGCAAATTAATGTAGGAAATTAAAGA  
TCGAGGAATAAAGCGATGAGAAGTGATGAATGAATTAATAATTTTGAAGGAAAGAAATT  
TCGTGCAAATCCAACCTGGAAAAAATAAGATAGAGAAATAAAATAATGTATCGTGCATA  
AGAATCAACGAACGTTGAACAAAATCTCCGTTTAATCGGGGATAGAGATCTCGTTTTCT  
CTCCGTGAGAAAAACGAAATACGAGAGAGGAAAAAACGGGGGAGAAAGACGGAGAG  
GCGGAAGGCAAAGCAGCGGAAATGGGGGAAAAATCCGAAGAACGGTAAAAGCGCAC  
GGTAAGAGGGATCCAGCTGATAAAGAGAAACGCCGAACCGAACGGAGAATTTAGCCT  
CTTCTAGTTACTTTTTTCTTCTTTTTTAATTTTACCCACCAGCGACGAAAGTACTTGTG  
CGAGAGATCGAGATAATCGGAAATCGACGGCGACGGTCTCTTGATTCTTTTTTATAACC  
ATCTCTTTTTTTTTTTTTTCGATCGTCCGGAAGTGGAGCGTTTAACGACCAGAAGAAG  
AAGAAGAAGAAAAAAGAAAAAGAAAGAAAAATTGTTCTTTTTTTCGCGCCTCTCA  
CGATTGTTTCATCTCCTTTTTTTTTTCTTTTTTTTTTTTTCACGGGAGGAAGTTTCGAGATTGA  
TTTTCTTTTTTTCGCTTATTTACCTACACTTTGCCGGATTTTCGCATCGAAAGTCGTCGATC  
GATCGCTTTTCACGTATAGATTAATGGTAAAGTCGTCTTTTTTCTTTTTTTTTTTTTTTC  
AAGATTCTAAGCTTTAAACGTAAAGAGTTTTTCTCCTTTTCGTATCGATGCAGTGTAATAA  
TGAAATAAATAAAAAATTTAGGAAGAAAAAGAATAGTGTGATTGAAAATCGTAAACGT  
GAAAACGATCGATCAGATATTATTCTTGGCCTCGAAGATGGAAAATTTCTTATAGTTAAA  
AACGTTTCGTTCTTGTCTTTTTCAATATATATATATTCTTTTCAAATTGTTAACATCATTT  
CTTCTAAATTTTATAAAATTTCCGATGTTTAAATTTACTCGTTGTCGTTGTCATCGGGGCC  
AAGGATTCAATTTGACGGGATTTTCAAAGATTTCAAAGGAGAATTCTTTTGAAGAG  
CCCGCATCTTTTTTCTCGACAGACAACGTCCAATTCATTCTTGAATTTAGATAAGATT

TCAGAGAAAGGAAAGAGAATCGAATCAATTCTAAATTTGGCGAACGATAATTTAAATCT  
TGAAACTGTGTAAAAATTTCCAAAATAATAATTTTCACGTCAGTTTCTCTTATCGCCAA  
GTTAACGAATTGAGGATTACTCGAGAAAGAAAACGAAATATAATTGCAAGTAGCTGTG  
CATCGTTAAATTTATATATAGATTTATATCATTCCAAGTTTCCAAATTTTTCGTAAAGCTGT  
TTATTTAAAGCTTGAAGTTATAGTTAAGAAGAAAAAAACAAAAAGGAAGAAAATATA  
AATTAACGATACACAGCTGCAGTAATTTTCGCATTTGGCCGTTGATCGATGCGCAAAAC  
CCCTTCCTGGTTTATCCGGGCCCTTTTTGTGCCGAATTTTCGAGGAAAATGAAAATTGAG  
AGGCTGATACCAGGAGAAAATTGCATTTACCAGTCTGATTGCGCATCCATCAATGTCCT  
CGATCGCGAGATTCGTGCACGGGCCGCGAAATTGGCGTTGTTGGATCTTCAAACCATT  
CGAGTCAATGTCCATTTGCTTCCTTGCTCGTCGAAAATAAAAAAAAAAAAAATAAATAAT  
AAATTCCCTCCTGTTTAAAAATTTAAATTTTCAGATATCTTCTCTTATCCTTTTAATAAGCA  
TCTTAAATTTTCTTTTACCTTTCGAGTAAATTCTTTTCGTTGAAATTTTGAATCATCCGC  
CAGATTTATAATTTGAAATTTTTTGAACGACAAAGCAATCCTTTTGCTTTCTTGACGA  
AACAAATGGACGAGATGGAATTTTTCCATATTTCCATTTCGATACGGGAAGAAGCGGCA  
GCGCGAATCTCGCGATCGATCGAAAGGAATAAAATCGGTACCGGTAGTCAGATGTAATC  
GAGAGATTATTAATATTCCATTATTTATTTGACAGGTGAACAACGCGACAGCGAGGGTG  
CAGACGAAAAAACACCGACGGTACCCAACG

>novel\_circ\_000486

TATGCGTACAATGGCCAGAGGGTAGGTGCTTCCACGACGTGCCGGAATCGGCACTGCT  
GAATCTCTACTTCGAGATCCGTGAGAATTGCCACGGGTTCCTGAAGGCGATGCCAA  
GAAAAAGGCGGCGACAGTGATGACGGCCGAGAGAATGAGAGAGACGATCAACGAAA  
CTCATCGGCCGAGCCGACAACCGTGTGCTCGGAGTAATCGCGACAGACAGTGAAAAA  
CCAAAAAAGAAAAAGAAAAGAAAAGAAAAGAAAAGTTTCACATTTTTTCGTTTGTTC  
TTCCCAACAGCCGCCAACACACCACGACCAAGCCAACATATAAAAAAAAAAAAAACC  
GAAAGAAAAGACAGCCACTAGGGAGAGACTCGAGGGTCCCTCCCGAGGGGAGGGAC  
AGTATCTGTATCTCCACGATTACGATTGCTCTTATACTGCTGCTACTACTTTTTTTTTT  
CCTCTTATTTTTTCTTTTTTTTTTTTTTTTCGATCGCTATTTTTCTCCCATCAACTTCGCTG  
ACTCGTAGCCAGCGAGCGTTGTCTCTTAGAGAAAATGTGGTACTTTGCGTGTCGTAG  
AGTCGAGTCTGTGGAATAGAAGAGACGAGAAAGAGTGGTGGAATAATTTTTTACGA  
GTTGAGGAGAAGAGTGAGTTTCTAAAAGATATAATTTAAATATTGCTCGACTCGGCT  
CGAAGACACGATTTTCCACAACACACTTGTGAAAAATGTTAACTTGCTTTTGTCTG  
CTCGTGTGTTTTTACGGGTTACCACAGGTCTAGCACTGACCCTTAGATGGTCCTCGCG  
AAAAAAGGCTCCGTTCTTGACCTCCCCTCCCCACGCTCTGCCAGACCCTCTTTTTTTT  
TTTTTTTAGGGTTCTCGATGATTCCAGCAGAACCAAGGTGGGTGTACAGACTTTATTTA  
CCTACAACTAATTGCTCGTCGTTCAACCAGCTCGCGAACTACTGTCTTATTCTTATATAC  
TTGTTGAAGTATTTATTCTCTCATATATATATTGTATTTTTTCTTCTCTTTTTTTTTTCTTTT  
TTTTTTCTTTCTTTTTTTTTTTTTTTTTTTTTTCTCTCTCAAACCTCTTCTACTCACTCG  
TCTTCCCTTGACCCCTTGTGTACGAGGGAGAGCTCGTGCTCACACACCAGACCCTGAT  
CCCACGTCTTTCTCTCTTACACATACACATACATATGTATATGTATACGCGCAAGCAAGC  
ACGAGAGTGTTTGCTACATCGTGGAAGGAGCAATTCGTGGTTTCTCGCCGAGATAGA  
GGCGGAAAAAAGAAGCGGAAATCATTGAAAAAAAAGAGAGAAATTCTGTTCTCCCG  
GTGAACATGATCGAACAAGTTTAAACTGCTCTGTGTCAGAGCATTCTTTTTTTTTTTTTT  
TTGTTTTTTCTACGCATATACATTTGATATTGCATACTTGATGCATATGAAATTAATTAGAA



TTAATCTTGCATATATTATCAAAAAGATTAAAATATTTTCGAAGAGAGTTTATATTAAAGAA  
AATGTGCAACGACATTCTAAGATCAAAGAACTGATAATTCAATGATCCGATATCCATAT  
TATATCCAAAGGATATAAATTTATCATTTTAAGAAAAATTATTCTAAATTTTGTTTATATAT  
TCTGATATATAAGCGAATTTAAAAAAGAAGAGAAAAAAAACAAACAAAATTTTCATGTG  
CATCAATCGAAATCAATGTATTCAGTACGAGATAAGATATATTAAAAATCGTGAATTAAA  
ATAATAGAAAAGAGAAAAAAAGGCCACGTGGGTAGCGTCTATCGGTGAGTGGTAGGTCG  
ACCCGAGACAGAGCGAGCCTCTGCCCTTCCATAATCATTCCCTCGTTTCGCTGAATGAACG  
ATTTTCCATCGCGGAAGAACTTCAGCGGGAACATAGAGATACAAGTTAAACGGTTCC  
ATTTGACCAACGATCGGTAAAGAAAGCGTCGAACGATCGATGCTGGAACGATCGATGT  
TGAGAAACGTACGTCCCTGACGTCTCATTTTGTCTCGCTGACGTTTCCACGCGATCG  
CCTTCGCGGATTTCGATTAGAATTGTAAGGTTAGCTTTAATCACGGAACCTACAGGGTATT  
GGAAAGTATTTTTACGACATTCCACGTTTCTCGTTTTAGCATTAAATATCGTTTTTGTACTT  
TGGACGTATTTTGTATTATTATGTATTACGTTTTAAATGGTTTTACGTAGAAATGATTCGA  
TGCAGGGTATTATTTCTAGTGATCGTAAGAGAGTTACCTTTTATAGTGACATGGACATT  
CCACGCGTGTCTTTTTTTTTTTTTTTTTTTTTTTTAAAGAGAAATCACTTGTTTTAATTA  
ATAATAATAATAATAATGTTCCCTGAATCGGGTGTGTGATTATAACCGCCAACGTGCCA  
TGAGGTATGTACGCCGAGGAACCTTGTATCGAGTTAAGGGAAAAAGAATTCGTGCGC  
GATCTGGATGGCCTTAATGAGTTCCTAAGTGTTTTTACGAAGTATCGATTAATCTTTCTA  
CGTTGTTATAACGGGAGAAGATTATGATGACAGTGTGCCAACGATAAAGGAAAAAAGA  
GTCGGATTAAAGTTTTTTAATTTAAACAAGAGTTAAACTTCAACATATATATATATATATA  
CATGGATATAAACATTAAATCTTTTTTAAATTAACACCATACATCCATTTTTATTTTGGA  
AAAATTCAGGAATTAATAAATTAATAAAGATATTTAAATAATATTGCAAAATCTTTAAGA  
AATAAATATAGTATTCCTTAAAATTTGATCAATAGAATTAAACCAATTAGAATGTTTATTAA  
ACCATTCGTAGAAACGCAAGCATCGATTGCGGATACAAAATACAATTCTCAAGTGTGTG  
TAATCCACCAGATGAATCGACCAATTCTCTTTCATCATTCTGTACACGTTGGCCCCGCGTT  
CGTGACTCGTAGATCGTCGTTCCCTAGATGGAACGAGAACGAGTATTACTGTGCGAGATG  
ACAGATTTTCAAACAGCCTGAATCGAAACACGAGCGCGTAACACGTAAGAATGGAATT  
GCGAAGTGGTGCATCGTTTCCTCTTTTCACTGTATTTCGCCTGTATCCCCCGTTTTTAT  
CTCTGTGCGAGAAGCGTGCACCGCTTCGCGTTTCCGAATGCGTCGATTTCGCAGTTAAAA  
AAAAACTGGGGGAGGAATCGGCGACGAGGTGAAAACGATCGAAAGCGATGAGCTAT  
AAGAGGGAAGAAGAAATGGCTGGAATGGGTGGAAGATGAGAAGTGACAATGGAG  
AGAGCACGCAACGGAGAGAGAGAGGGAGAGAGAGAGGAAGATGGATGAAGAGAGA  
AGCGACACAATAAGAAAGAATGTTGCGAGAAAGGAATTAAACGAAAATCGAACGAAT  
TTTCTTAACTTAAAGAAGTGATTGGTAGCCTTGGAATTTGATCTCGATGCGTGCGAGTT  
TGTTTCGAAGAAGATGGAATTAGATGGAATTAGTTTTGCGAGAAATTTGGAATATT  
ATTGCTTGACGATAAGAAGATTCCAGAAAGAATAAAAATTATTTGGGATATCTTATGGA  
GTTTTTTAGAAAGTTTTTGAAATTCGAAATTTCAACGAAATTTACAGAGTTATGAATAAT  
TGATAAATTTTTTTGCAAAAGCAAGGAATCTCTATCCGCGGATGATTTTTTTATCGTCAA  
GAAATTCGAGAAACGGTATATTTATCGCGGGAAGGAAAGAACATGTTTCATTTGAAAG  
AATGCCAAGACGATTTAATATGTTTTCCAGCCAGGCAATAAAGAAGAAGTTTTTCTACT  
TTATCAAAGAACACGAAGAATTCTCACTGTCCATTTTTTCGAGATTTCGATTACGTGGCA  
TGCATCGCTCGTTCCTTCTCCTAAACTTTTTATCTTTCTTCTTTATCCCCCCCCTCTCTT  
TCGTTTCTCTTGATCCAATCTCGTCATTGGATCGAACTTTTGTACTCTTTATCCTTTCGTT  
TCATTTATCTTCTTAAGCGAAATACACCTCCGATTCAATAATTTTTTTTATTTCACATTTTC

CCTGATTTCTTTTGTTCGTTATTCAAATCGAACCTTATTAATAATAGGAGAGAAAGATCG  
TGATTTCTTAATCACGAACGCGGAAAAATTATTATTTACTCCGTTTCCTTCCTTTTTTTAA  
AGTTCCTTAAAATTCTTTTTTCATTATTTTTATTATCATTATTATTACTATTATTTTCCG  
AAGGATCAATCGAAAATCGATTAAATTTGAGGATATATACTGCACATATATATATGCGTA  
TATATCCATTCTCCGTTGTTGTAGAAATTAATTTAATCAGGTCACGTGAAAGAGCATAGA  
TTTCAAAGGAATGCATGCAGTAGGCTTTTTTTGGTCTTGATTAGTGCGCTTAGCTTTC  
AGTGAATAACACTGCGACAAAATGAAACCCGAACTCGATTGTAACCCGGTAGATATTG  
GGACCTTGTCGAGCGATAAATCGTCAACGAAAGTTTCCAATTCCATAAAAAAAAAAAG  
AAAAAAAAAGTATTAACAAAACAAAATGGATATATTTGGAAGCAACAACACGCGTTG  
TATCGTTGACGAGAGCCCCCTGAAGCTTGTCCGACACGCTCGACAATTCGTATACCAG  
AAGCCCTCCCCCTCGTTTCACCGTTTGCATGCCACGTGTATACCACCTTCTTCACACAC  
GTAACGCATTTTTTAAAAATCGTTGCAAAAAAGAAAAGAAAAGAAAAGAAAAAAG  
AATCGCGTCTTTCTTCCGTGTTCTCACGTTCTCTCTGTGTCGTTTCCTGCTCTCTATCGA  
CTCTTACGATTCACTGCTGCTACAAGCCACGATCGTTGTTTGCTGTGCATCGTCGATGT  
GCACGTGCCCATCCAGGAACACGTATACAACAACACACCCGTGTGTGGAAGGAACCG  
GGAGGAGGGAATACGAAGAAGCTGTCTTCGCCTGCGAGTTGGTAGCTTCGTGCATTCTG  
ACAAAATCGCGAGATTTTATGTTGCTATCGCTGTTCAATAATATTATTCTCGAAGAGAAT  
ATATCGAGAATGTGAAAAAAGAAAAAAGTATTCGTGCGATAAACGATAAGTGTG  
CATGGTGAAAAAGAAAAGAAATAGTTTCATTTTAAATTTTAAATTTATTGAACGAAATC  
GTGAGATTTTCGCGTTTTTCGTTTTCCAACGCGAAAATTTGTGCGAGGTTCTTTCCATGAG  
TTTTCTTGGGAGGAGGGAAGGGGAATGAAACGCGATATCGAACGCACGAAGCTATTCT  
CGAGGAAAGGATGGCTCGTTTCGCGCGGCAAAAGGTCAAGAGCGGTGGAAGTGGCT  
GAGAGGTTCGAAAGAAGAGCGCAAGGAGGACTCGTGGAATAATGGAAGATGGTTATCG  
AAGGGCGAAAATTGTCAAGAACCGGAAGCTGGACGTCTTTCCACATACCAGAAGCG  
GTATCGAGCGTGAAG

>novel\_circ\_000487

GCCGCGGCAGCAGCAGCTGCAGCGTCAACATTGCTGAAGACGCCCCCTCTCGACGGCG  
CAGCAGGCCACCTACGCAGCTGCAGCGACCTACACGGCAGTGGCTGCGCGCGCATAC  
AGCGCAGCTGCAGCTGCGGCACAACCGGTGCGCAGGATATGCCGCAGTCGCGGGTTATG  
GGCGTGAATACGCTGATCCCTATCTTGGACATGGTATTGGACCAGTAGCCGGATATGGG  
GCGACCGTGTACAGGGGCGGCTACAACAGGTTACGCCATATTAAAAATGGTCAAATA  
TCGAAGCGCGAGCCTTCCAAGTACACCGTCGTTGTACTCAGCTGAATGTGACCAGAAC  
AAACAGAAATCGACACAATCATCATCGTCATCCGCCATCGATCACGATCACCCACGA  
AGCGATGCCTGGATCCTCCGCGCATGCTGACGCTAGCCTTCTTCGTAGCAGTACGAGAT  
CGTCGACTTTGCCTCTCATCCACGCGGAAAAGAAGCAAAATTTCCCTAAAAGGAAAC  
ATCCAGCCATCGTGACGAAGCTCCAATCAAGTCCAAGTTACCAAGGTGTCGACTAAT  
CACGAAGAATACTACCATTCAGAAGCAAAAGAAATTGGAAGAAGGAAATGGATACAGGCC  
GCGCACGGTTCCAGGATCTTCGAGAGGAAGAGAAGAAAAATTGGCGAATTATTGTGGA  
TGAGAGTAATCGAATAGATGGACGATTGATAGAGAAAAGGGTTATGAAGATAATGAAA  
GATGATAATAGAATGGTTTGAATTTAGATGTAAAATTTCTAGTTACTCCTCGATTAGGGT  
TGCGAAACGGTCGACTAGACGACAAAGGTCCATCGTCGTCGAACTTTCGAACCCTGAT  
CGATAATCGGCGTAGAGAAGAGAGGGATGGTAGAGACGGGGGAAATTGGTAAACTGA  
ATTAGCAGACAAAGAGGAACCGGTTAAATTGAGTTTCGCTCGAAACATGCTAAACATT

GGAAACAGATTCGAATCGATCGTTTTTAAAAAAAAAAAAAGGGGAGGGGGGAGGAAAGA  
AATAAAAGTGGTAAATGGTGATGCTGGATCAGAGTTGTAAGAGTTTATTGTATGAGAGA  
AATCTTTTCGAAACATTCTTGAGAATTGTTTAGTCGAAATTCACGTGAGGGAACCGTGT  
GTAAAGGCATCGCGTCGTAAATTTATCCATTCGTATATACGAGTTTCAGACCCGGCAGC  
CATTTTCGATTTATACGAAGTTGAACGACAGACAGAGGGGGGGGGAGGGGGGAGAGAA  
CGTGTCAATATCGCCGGTGACGTGTATATATATTTGTGTATATACATATATATATATAT  
AAATAAATAGATATAGATAATTGATCTCTCTAGAAATCAATTGTAATTATGCAATTCGTTG  
CTCGTGACGTTTTCTAATAATCGTTGGGGGGGGGGAGAGAAAACTTTTAAACGCGTT  
TCCGGGCAAGGATTTTTATCACGAAATGAAAAATGGGGGTAATTTTTAATCTCATTACAT  
GTATACGTTACTCGTCATTATTGTACGATAATTTACGCGAAATCCGAAAGAGGAGGAA  
GGGAAATGTTGAACACAGCATATAAACACAAGGAATTTTGTACATAATTCATAATTGATT  
TCGTGGTTGGGGAAGCGGGATACACGACGACGCAACGATCACAACACAGAGAGAATT  
TTGAATCAAAGAAGCAAAGAGCGATCGATCGTTGCTTCTCTCATATATTTCTTTTCTTTG  
TTCCGTTTTTTTTCTGTTCTTTTCTTTTCTTTTCTTTTGTGTGCATATATACATACATAT  
ATATATATATATATAAAGGAATCAAGTTTTTCTTTAATCAAGTTTTAATCGGAAAATC  
GAGGATTCGAGGATTCTCGCGGGATCTTTTCTAATTACGAAAATCGGGAGAACGCACC  
GATTGTATCAAACGCGATGATAAGAAGGGGGGAGGAATTCGCGCTAATGGCTGCCGG  
AAAGGAACTCTTCGCTTCGTGTGCGCGAGGTGAACGCGACTTCCGGTGACAAACGCC  
AGTCGACATTGCTCGGTGATCAGCGAGGATACGCGAGACCCTTCTTAGGTAGCTAGCC  
GAGGGAAAAGTTTAAGGAGAGGGAGAGAGGGAGAGAGAGAGAAAGAGAGAGAGAA  
ACGACGAGAGCGACGAAGCAGTTAGTTACGCGTGACCGGTAGGGTTTCTATGCCAAAT  
ATAATGTGTGTGTGTCTATGTTGCGCTTGTGGGCGCGCGCGTGTGTGTGCGTAGATTG  
CGGCTATAGAGACGTAGAATAGTTAATATGGCGGAGGGGAGAGAGAACCCTTTGAAAC  
GAACTCTGAGAAAGCAAGATTCTGGGAAACAGGATCTAGTCAAATCAGTCTCTACCGG  
TTCCTAATCGAGATTACGTCAATGTAAAACGCAGCTTTTTTTTTTTTTTATGAATACTCA  
AGGCTTCGTGATGCTCCGATGGGAAAGATGAGAAAGGAAAGAACGTGGCAGCATTCT  
TTTTTTTTTTTTTAGATATGGATATTCTTTTGTCTGTCTTTTATTATTACTATTACTATTAT  
TATTATTATTACTATTATTAATATTATTATTATTATTATTATTATTATTATAATATTATTATTA  
TTATTATTATTACTATTATCTTTTTTTAAGGAATGGTCAGTTTTTCGAGGAAAACGGA  
GCTTGTGATCGAGGTTTCTACGCTCTCTTATTTTCTAGCTACTTTTTGGTGGAGGAATT  
GGAATAGAG

>novel\_circ\_000490

CTCCAAAAGAACCACCTACATCGCTGAGACCTTGCAGTCCTTCACCGTGTGGAGTCAA  
CGCTTATTGCAGAGAAAAACAAAATACAGCGTATTGTGAATGTTTGCCAAATTTCCGTG  
GAAATCCTTATGAAGGGTGTCAACCTGAATGTTTGACCAACACTGACTGTCTGAAATC  
GCAAGCTTGCGTCAAGACTAAGTGTGAGGATCCTTGTCTGCTGACTTGTGGCGTTGGT  
GCGATCTGTACAGTTTCTAATCACATTCTTATTGTTCTTGTCTCTACCTACTATCGGCG  
ATGCGTTTACGATCTGTCAAGTCATTCTGAAGGTCCAAAAGAAAGAGATCCTTGTTCT  
CCATCACCATGCGGTCCTAATACCATTTGCGAAAAAATCGGCGATACGGCTGTCTGCAA  
ATGTTTACCTGGTCTCCAAGGAATTCCTTCTAGTATAACAGGTTGTCATCCAGAATGTGT  
GATTAGTTCAGATTGTCCGGGAGACAAAGCTTGCATCGATAATAAATGCGTGAATCCTT  
GCACACAAAATGTGTGCGGTATCAAGGCCACATGTAAAGCCATCAACCATAGTCCTCTA  
TGCAGCTGTCCACCTCCTTTAATTGGCAATCCATTCGATGAATGTATTATCCAAATTGAA

ACTGATCCTTG TAGTCCATCTCCATGCACTTATAATGGCGAATGTAAAGTT CGAAATGGC  
ATTGCGATATGCATATATCCAGAATGTGTTATTAATTCCGATTGTCCACGAGAAAAGGCT  
TGTTTCGGCCAAAAATGTAAAGATCCTTGCATCGGTGCTTGTGGTATCAATTCATTGTGT  
CAAACAGTGAATCACAAGCCTGTTTGTTTCATGTCCAATTGGATTCACTGGAAATGCTCG  
TATACAATGTACTATTCCAACGGTCTGAAGAACCAGTTCCAGAATGTATTCACAATTCCG  
AATGCCCCGAACGATAAGACTTGCTACAACCAAAAATGCATTGATCCTTGCACACTCAA  
CTCCTGCGGTTTTAACAGTCGTTGCCACGTACAATTACATCGAGCTGTATGCGTATGCAA  
TGAAGGATTCACTGGCAATCCTCAACAATATTGTGGTGAAA

>novel\_circ\_000492

AACCGGAACACTTCGACAATCTGAGGAATTGCCTGGAGCCGAAGGACTTCCTCAAGA  
GGGCACGGTCCCTGATGGTGGTCGTGTCGACCCCGCCACGCAGAATTACGAGGAGTT  
CACCAAGAAGGTCAGAGAGTACAGCAGCAAGGAGCCGTTCAACTTTGTCATCCCCGA  
GTTGCTGAGGAAATACGAGAAGTACGTGTCGATCCACGCCGCGTATCTCTACGATTCCG  
TGAAATTGTACGCGAGAGCCCTGGATCAACTTCTCAGGGATCAGCCGGAGCACACTCT  
CGAGGAGATCGCGAGCAATGGCACCCAGATCATCGAGACGATTATCAGAAATCACACG  
TATCAGAGTGTACGCGGAGCGACCATCAAATTTCGACAAGTTCGGCGACTCGGAGGGG  
AATTTCTCGGTGCTGGCCCTGAAGAAGGATCCGTTCCGTTTCAACAACCTTCTCGTGCG  
ACTTTCAAATGAAGCCTGTAGGCCAATTCCAACAGGGTGAAACTCTA

>novel\_circ\_000494

GATTTAAATTTCAAGAGAATCTTTTACGTACGATGATACAAATAGAGAATACGTTCTTCC  
AGCTGGGTGACAGCTGTACAAGAAATTGTCTTATTATTTGTGATCGTGGTGCCATGGAT  
GCTTCTGCATTTATTTCAAAGGATAAGTGGGAATTACTGATGGCTTCGAACGGATGGAA  
TAGTGTCGAACTTCGAGACAATAGGTATAATCAAATCATCCATATGGTCTCAGCGGCAA  
ATGGTGCTGAAGAATTCTATTTCGACGGAAGAACATGCATGTCGATCGGAAGGTGTCGA  
ATTGGCTCGGGAACCTCGATTACAAAGCGGCCGCCGCTGGGTGCGACATCCTTATTTCTG  
ATGTAATAGATAACTCGCAAGATTTTGAGACAAAGATCTGTCTGATGATCGAATGTGTG  
TGCCAAAAACTGGGTATCGATACTGGAGATAGATTACGAGCGAGTAGCAGAAAAGTCA  
AGTTTCTTGTCAAAGATCCTTTGCCACCAGACTCTGAGTTTCCACCGTTTCAGGACTTT  
GATGTTGTCCATAACTACCTCCAAAGTAACAATCCGAAGATGCAAGCTCGTCTTCGTAA  
ACGTGGCCAAAAAGGTCACTGGTCTTATATTCATACGATTCGACGTCCAAAAATGTGTG  
GCCAAGTGATTGAAGTTAAACACAACCTGACTCATCGAGATTATTTGAACATGCTCGCT  
CAACGCGATGATTCACATTTACCATTTTCAAACGTGACGTTGTTTCCTCATCAACAA  
TCAGTATTTCCAATTAGATATATATAGAGAACCCGCTCATCCAAGATGTGAGGATTGAT  
GCTGCTTGAAACGTACACAGCATTATCAGGAGATGAACTTAAGAATATATTACCACAGT  
TCCTGACAATCGAAAAAGAAGTCACTGGAAATCCAGATTACAGTATGTTCAATCTTAGT  
CTACGAGAAGAATGGAATAATACCAATAAATATTGCCATAATTTACACG

>novel\_circ\_000495

CTACCTGGAGTGTCTCCTGGAGCTATTTTCATCCGTGGTTGCACCCGTGTTATTAAAGTAT  
CGGGTCTGCAGACCGAGATTGTTGCTCGCCGGTTCTCGAGCCGAGGTCGATCCAGCCG  
CAGATGTGGGATTGTTGCACGGGGAAGTTTTTGTGATCGAGGACTCGGCGAGACAGTA  
CGATCCGATAGGAGATACGGACAGGAGATACAGAGCCACGGAAAAGTTGTTGCATGCA

GAAGAGGAGTATCACGAAGCTTTGTGCAGCGCGAAAGAATTGTACGCACGGCCCCCTG  
GCGCGAAATTATCCCGAATTTACGATGTCATCTTTCAACCGCTCGCGGATCTCTCCGT  
GGTCACTTCTGAACATTGCCAGAGG

>novel\_circ\_000496

ATCCGCAGCGCACTCGAGAATTGGGACGGCGGTACCTTCAAATCGAGTGATTTGTTTC  
CTGCCTCGTTTTGGAACCTTACTGGGAATACCTGGAGAGCTATGGGGAGGCCAGGAG  
GATTCTTGACGAATTGAGGGCATTGAGGATCCCCTACTCCACTTCCTCGGTCTTAGGC  
AAGCTGCGGCCAGGCATTCCCCGTCCTCGTTACTTCTTTTACCG

>novel\_circ\_000497

GAACCACCTGTGGATTTGCGCGGAAGCATCGAGTGACGGAAAGTGCATACGTACACAC  
GTATAACTGACTAACTGTCCCCGCGGTGGAGGAGGAGGAGAAACACCCCGTGCATGTT  
GGCACGAGGTGTTGAACTCGAAGGGCCGGGCCGTGGCGGACGATCATGCCGATCAAG  
TCCGAGTGAGGGAGTATCGTTTCGATCGCGGGCAAAGAGGTCTGAATGATGACCATGT  
TCGGGACCCTCGTCCAGAGGCTCACCTCGCCGGTGACCTCACCGACGAGCCCTCGAC  
GCCGTTTCAAATCTCCGTCCCGTTGGGAGGTGCAGAGCGACCCGGAGGACGATCCGG  
CCGCTCCGGTCCGCAAGTCGAGGGCCAAGCATTTGTTGGATAAGCGCAAGAGCAAGA  
GCAGGGCGCGAGCTTTGAACGTGCATTCGGAACAAGTGCAGATGTGCAACTCCGGAT  
GGCACGACGCCGCGTTTCCGCCGCTTCGTGGCACCAAGAGTCTCGGCAGGCTCGACG  
GTATGAAAGAG

>novel\_circ\_000498

GTCCAGAGGCTGGCCGAATACGAGAGGTACCTGGGCCAAGAGGCGAGGAATCTAGTG  
GAGAACGGAAACGGAAGCGTCGGGAGTGGCGCCGTTCTCCAACGTGGCCAACTGGA  
GGGAGATCTTCATCGTATCCAGGAATTGTTTCCTGGCGATAATCTCCGGCTGCACGAGC  
GAGATGTCCTCACTACGAAAATGAAGAGTCTTATTCGCAAGAGGAACAGTGGAATCC  
TGGAAGGCTCACGAGAGTGTTGTCGAAAAATCATTGAACGTGTCCAACAACCTCACC  
AGCCCCGAAATCTCCGCCGAGAACCTTCCTCTTGAGACACCGGTACAATTCACCACC  
GGTGTGCAGTCCCAGGACAGACATCTTTTTCTCTTCTCGGATCTGTTGCTCATAGCAA  
GGCACGAAACGGAGGTAACCTCAAGCTGAAACAATCCGTAAGGATGAGCGAGTTGTG  
GCTAACTGCCGGGCACATAGAGGACGTGGCCGAGACGAGCAAATCTCAGGAAACGAG  
CTTCGTCTTGGGTTGGCCACCACGAACGTGTCGCCACTTTTATGACTGCTGCAGCC  
AGGGATCTCTGGTGGGGACGTTTGACCGAACTCGTACGAGAGGAGAGTATGAAGGAG  
CCGCCGGACACGAACATTCAAGTCGTGTATCACGACAGTGACACGAACACGGAATAC

>novel\_circ\_000499

AAAATGAAGAGTCTTATTCGCAAGAGGAACAGTGGAATCCTGGAAGGCTCACGAGA  
GTGTTGTCGAAAAATCATTGAACGTGTCCAACAACCTCACCAGCCCCGAAATCTCCGC  
CGAGAACCTTCCTCTTGAGACACCGGTACAATTCACCACCGGTGTGCAGTCCCAGGA  
CAGACATCTTTTTCTCTTCTCGGATCTGTTGCTCATAGCAAAGGCACGAAACGGAGGTA  
ACTTCAAGCTGAAACAATCCGTAAGGATGAGCGAGTTGTGGCTAACTGCCGGGCACAT  
AGAGGACGTGGCCGAGACGAGCAAATCTCAGGAAACGAGCTTCGTCTTGGGTTGGCC  
CACCACGAACGTGTCGCCACTTTTATGACTGCTGCAGCCAGGGATCTCTGGTGGGGA

CGTTTGACCGAACTCGTACGAGAGGAGAGTATGAAGGAGCCGCCGGACACGAACATT  
CAAGTCGTGTATCACGACAGTGACACGAACACGGAATAC

>novel\_circ\_000500

GTACAAAGCGAATCGTTGCGTGAGCGGGGGCGGTGGCCGCGGGAACGGCGCGACTGG  
CACCGGAGGCGGTCTAGGTAACGGAGGCAGCGGCCGCGGGGGCGGCGGGGGCGGTA  
GCCCCGGCAGGGGGCGGCGGCGGAGGCGGCGTCGGAGGAGGAGGCGGAGGTAGGAAC  
GGAGGAATAGACGGTGGTGCGATACCCGCTACACCACCGACGATCAGCCGTTACCACC  
ACCGCTACCATCACCACCATCACCACCATCATCGTAATCACGACCACGTCACCACGACC  
ACCACGGCGGACGCCACCACCATCACTGGCGTCGCCTGGCACCTCAGGCACAAGCTA  
CCCCTTGAAAGCAGTGCCTCGAACACCGTCTTCAACATCGGCATCACCATCGGTCCC  
CCTATCGGGCCTTAAACATGGGCCAAAAGATTTTCAG

>novel\_circ\_000502

GAAGCAGCGACGAAGGCGAGTCGACGTCGGGCACGCCAGCCGGGGGAGGCACGGGG  
GGTAGCGGGGAGAGCCAGGAAATGGAGGAGAACGGTACGATCCGTGGCGGAAGCAA  
CAATTCCGCCGGAATCTGGTGTACAGGGATCTGAAGGCCCTTCACCCGTCAAGCCAC  
GACGTGTCCTCCCAGGATTACAATCCGCAATCGAGGCCGTCGTACCAGCGTGGCTACT  
CGCCGGCCATGGACAAGCCGAGTTACGAGAAGGAGCAGCACAGACCGCCCTCGTCCA  
GGGACGAGGAGAAACCTTCCTCGTGGGAGTACGGGGAGAAGACCGAGAGGAAGGAG  
TACTCGAGATCGCGGGATAGCTTGACAGGAGCGAAGCGTATCAGGACGCGACGAAGC  
AGGAGCAGAAGGAGCACGCGAACC GCGAATGGGTATCGCCGGTGCCGGAAGTGGAG  
GTGGGCGGCTCGGCGCCGGGCGGCCCCAGGTACGAGCGCGGAAGGACATTCCAAGG  
GGCGCCAGATTCGGCCCTTTCCTCGGCAAATGGGCCAGCGAGCCTTTCAACCCCCGTT  
ACGCGTGGGAG

>novel\_circ\_000503

GTTTCGTACGGCCGGAAGCGGGGTGAGGGGGTGGTTGGACGCATCCACGAGACGAAT  
AATTGGTTGAAGTACGTTCTGAAGCACTAGCAGCCCGCACGCGGTTAACATGCGACATG  
TGCTCATCGGTGGACAGATGGTGTACGAGGCGGTGAGGGACATTGCGGCGGGTGAAG  
AGCTTCTTCTCGGTGTTTCGAGAACCTCTTCAGCTTCAGGACATGCTCGGCGAGAATAC  
GACCGAGGATCGAAGCGACCGAGAGACCG

>novel\_circ\_000504

TTGACTAGCAATAGATTGAAGAACACGAGGGGTACCATACATTGCACCCAAACAGCTG  
CTAAATGATGAAACATAAAGACCTGCTAGTAGCAATACTGAAATTGCTGATACTGTTGA  
TGCAATCATAAAATTCGTAAGCAGTGCCTTTCGAGTACAAGTTGCCGCGAGAAATATTG  
AAAAACATAAATATAAAATGTTCTGAAATTAAATTACAAAATTGTAATTAATTTTTTAA  
TGTTGAATGTAATATAAATACTTTCAAACCTATTATTTTTTACCCAGTTCCACAGCTGCTA  
ATGTGCCATTAGGAATATCAGTAGATGGATGTTTTAAATCTCCACTCATATTAATACCAGC  
TAAAACACCAGTTACTGTAGGAAAAAATACGC

>novel\_circ\_000505

AATGTGGACCATAAGATGAAATTCCGTTCCAAGAAAGGCGCGTTACCATTTGTCGAGCT

AAATGGTGAGGAAATCGCGGATAGCACGATTATCCTTCGTGAGCTTAGCCAGAAATTTG  
GTAAGGATCTGGACGCTGTTCTTACGTGCGAGCAACGAAGCGTATCCCACGCAATGATA  
TCGATGATTGAAAACCACTTAGTCTGGGTGGTCATGTGCTGGCGAACTAAGAATCTTGA  
TCAGGTTTTTAAGGGTTACAAGGTGAATCTTCAGCACGTGCTGGGTACTCGTATCCCAA  
ATGGCATTCTCAATTTCTTTTTCAAACCTCACGGTCGGTCGTAAGGGCGCAAAGAAAGT  
GAAGGCGCAGGGTATGGGTGTACATACTCCAGAAGAGGTGTCCCAATTCGGTTGCGCC  
GATCTTAAAGTTCTTTCTGACATGCTTGCAGACAAGCCTTTCTTCTTTGGAGACGAACC  
GACTACGTTGGACGTTGTAGCATTTCACATCTTGCCCAAATTCTCTATATCGATAAAGA  
CACGCCATACAGTCTGCGAGACTATATGCAGGAGAATTGTCCAAACTTGGTGGGACAC  
TGTTACGCATGAAGGAACGATGCTTCCCGGATTGGGATGAGATTTGCTCCACTCTTGA  
TATGAATACTCATCTACCGAAACCGGAAAAACAGGAAGAGAAGGAGGGCAAGGAGGA  
TGCAAAGGAGTCGAAGGAATCAAAGGAAGAGAAAGAGGGTGACAAAGAAAAGGCG  
GATAAAGAGGAGAAGGAATTGGAGAAAGACAAAGAAGTTGATGAAAACAAAGAAAA  
GGAGAAAGAAGGGAAATAAGCTCTCTTGAAAGACAAACAAGTCGTTTCAGAGAAAGG  
GAAAAAGAAGATTTAAAAACTTGAGAAAAGAAAATTGAGGGTGTGATCTG

>novel\_circ\_000507

GGTACAAACGGTCCGAGACCGACGTATGTAGGTGCTAACAATGGAAATGCCGGTGGCG  
CCGGTGGTGGCGGCGGTGGAGGCGGTGGAAGCGGCGGTGGTGGCGGTAGCGCTACGG  
GTGGTGGCGTCGGTGTAGGTCCAGCGAGTGTTGGCGGCGGCGGCGGAGGTGGTGGTG  
GTGGTGGTGGTGGCGGTGGTGGTGGTGGAGGCGGGCACGGATTGAAGGGGAACACTG  
GTGGCGGGCCACGAGGCGGGAACCCGGTGCAGTATCGTGCGAGCGGTGCCGCGGCTT  
GGGGCGCAGCGCCGCCCTCTCATGCGGCTGCGGCTGCGGCTGCGGCGGCAGCGTATCC  
ACCGTACACGCGGTATCCAAGCGCAGCGGCTGCAGCTGCGGCCGGCCAGATGCCCCGTC  
GGAGCACAGCAACTACCGCCTACGGCGAATCCTTACGCCACCGCCACCTACGCACAGC  
ACGCGTCG

>novel\_circ\_000508

GGTACAAACGGTCCGAGACCGACGTATGTAGGTGCTAACAATGGAAATGCCGGTGGCG  
CCGGTGGTGGCGGCGGTGGAGGCGGTGGAAGCGGCGGTGGTGGCGGTAGCGCTACGG  
GTGGTGGCGTCGGTGTAGGTCCAGCGAGTGTTGGCGGCGGCGGCGGAGGTGGTGGTG  
GTGGTGGTGGTGGCGGTGGTGGTGGTGGAGGCGGGCACGGATTGAAGGGGAACACTG  
GTGGCGGGCCACGAGGCGGGAACCCGGTGCAGTATCGTGCGAGCGGTGCCGCGGCTT  
GGGGCGCAGCGCCGCCCTCTCATGCGGCTGCGGCTGCGGCTGCGGCGGCAGCGTATCC  
ACCGTACACGCGGTATCCAAGCGCAGCGGCTGCAGCTGCGGCCGGCCAGATGCCCCGTC  
GGAGCACAGCAACTACCGCCTACGGCGAATCCTTACGCCACCGCCACCTACGCACAGC  
ACGCGTCGTATGGTGGACAAAGGGTGCCTACAGCCTCCTCTCCAGCTAATACTAATAGT  
AGTTCTAGCAGTGCTACCGGCAGTCGAAGTGGGACAATGAGCACAAGTCTTAGCAATA  
ATGCTATACAAGGACAGCAAACAGAACAGTTGTCAAAAACAAATTTATATATTCGTGGC  
CTCAACCAAAACACTACTGACAAGGACCTCGTTAACATGTGTTCTCAATATGGAACAT  
TACGTCTACAAAGGCAATCTTGGATAAAAATACAAATAAATGTAAAGGTTATGGATTTG  
TAGACTTTGAATCACCAGTGGCGGCAGAGGGTGCTGTGAAAGCACTGGTCGCCAAGG  
GCATCCAAGCGCAGATGGCGAAAGTGGGTATCTGGTTGCTCCCTAGACTGCCAGT

>novel\_circ\_000509

GGTACAAACGGTCCGAGACCGACGTATGTAGGTGCTAACAATGGAAATGCCGGTGGCG  
CCGGTGGTGGCGGCGGTGGAGGCGGTGGAAGCGGCGGTGGTGGCGGTAGCGCTACGG  
GTGGTGGCGTCCGTGTAGGTCCAGCGAGTGGTGGCGGCGGCGGCGGAGGTGGTGGTG  
GTGGTGGTGGTGGCGGTGGTGGTGGTGGAGGCGGGCACGGATTGAAGGGGAACACTG  
GTGGCGGGCCACGAGGCGGGAACCCGGTGCAGTATCGTGCGAGCGGTGCCGCGGCTT  
GGGGCGCAGCGCCGCCCTCTCATGCGGCTGCGGCTGCGGCTGCGGCGGCAGCGTATCC  
ACCGTACACGCGGTATCCAAGCGCAGCGGCTGCAGCTGCGGCCGCGCCAGATGCCCGTC  
GGAGCACAGCAACTACCGCCTACGGCGAATCCTTACGCCACCGCCACCTACGCACAGC  
ACGCGTCGTATGGTGGACAAAGGGTGCCTACAGCCTCCTCTCCAGCTAATACTAATAGT  
AGTTCTAGCAGTGCTACCGGCAGTCGAAGTGGGACAATGAGCACAAGTCTTAGCAATA  
ATGCTATACAAGGACAGCAAACAGAACAGTTGTCAAAAACAAATTTATATATTCGTGGC  
CTCAACCAAAACACTACTGACAAGGACCTCGTTAACATGTGTTCTCAATATGGAAGTAT  
TACGTCTACAAAGGCAATCTTGGATAAAAATACAAATAAATGTAAAGGTTATGGATTG  
TAGACTTTGAATCACCAGTGGCGGCAGAGGGTGCTGTGAAAGCACTGGTCGCCAAGG  
GCATCCAAGCGCAGATGGCGAAAGTGGGTATCTGGTTGCTCCCTAGACTGCCCAGTGT  
ACGTTGGTTGTGCATGCAA

>novel\_circ\_000510

TATGGTGGACAAAGGGTGCCTACAGCCTCCTCTCCAGCTAATACTAATAGTAGTTCTAG  
CAGTGCTACCGGCAGTCGAAGTGGGACAATGAGCACAAGTCTTAGCAATAATGCTATA  
CAAGGACAGCAAACAGAACAGTTGTCAAAAACAAATTTATATATTCGTGGCCTCAACC  
AAAACACTACTGACAAGGACCTCGTTAACATGTGTTCTCAATATGGAAGTATTACGTCT  
ACAAAGGCAATCTTGGATAAAAATACAAATAAATGTAAAGGTTATGGATTGTAGACTT  
TGAATCACCAGTGGCGGCAGAGGGTGCTGTGAAAGCACTGGTCGCCAAGGGCATCCA  
AGCGCAGATGGCGAAA

>novel\_circ\_000511

TATGGTGGACAAAGGGTGCCTACAGCCTCCTCTCCAGCTAATACTAATAGTAGTTCTAG  
CAGTGCTACCGGCAGTCGAAGTGGGACAATGAGCACAAGTCTTAGCAATAATGCTATA  
CAAGGACAGCAAACAGAACAGTTGTCAAAAACAAATTTATATATTCGTGGCCTCAACC  
AAAACACTACTGACAAGGACCTCGTTAACATGTGTTCTCAATATGGAAGTATTACGTCT  
ACAAAGGCAATCTTGGATAAAAATACAAATAAATGTAAAGGTTATGGATTGTAGACTT  
TGAATCACCAGTGGCGGCAGAGGGTGCTGTGAAAGCACTGGTCGCCAAGGGCATCCA  
AGCGCAGATGGCGAAAAGTGGGTATCTGGTTGCTCCCTAGACTGCCCAGT

>novel\_circ\_000512

TATGGTGGACAAAGGGTGCCTACAGCCTCCTCTCCAGCTAATACTAATAGTAGTTCTAG  
CAGTGCTACCGGCAGTCGAAGTGGGACAATGAGCACAAGTCTTAGCAATAATGCTATA  
CAAGGACAGCAAACAGAACAGTTGTCAAAAACAAATTTATATATTCGTGGCCTCAACC  
AAAACACTACTGACAAGGACCTCGTTAACATGTGTTCTCAATATGGAAGTATTACGTCT  
ACAAAGGCAATCTTGGATAAAAATACAAATAAATGTAAAGGTTATGGATTGTAGACTT  
TGAATCACCAGTGGCGGCAGAGGGTGCTGTGAAAGCACTGGTCGCCAAGGGCATCCA  
AGCGCAGATGGCGAAAAGTGGGTATCTGGTTGCTCCCTAGACTGCCCAGTGTACGTTGG



TTGTGCATGCAA

>novel\_circ\_000513

ATCGTTTATTGATCAAAAATAAGGGATGATAATAATTAAGAATTTGATTCTTTCACCTTG  
AATATACCAAACCATACTTGTAAGTAACTCTAAAAACTGTTTCGGTGCACGCTCTACATA  
CAAAGTGTAAGAAGTGTGTGACATTTAGAGCGTGCACACGCAGTGTGCAGTTTACAGT  
AACAGTGTATTTCTGCAGTCTGTGTCTGTGCATAGGCAGATGGTTTTTTTTAAAGTACGC  
ATTATAAATTATGCATACAACCTACACACCACACACTCGTTTCGCACTTTCTCTCTCTCT  
CTCTCTCTCTCGCTCTCGCTCTCTCTCTCTCGCGCACATTCACGTTTTTTTTGTGTCTCT  
ACTTATATCTCACGTTCTCTCTCGCGTTCTCTGTCTTTCTACCTTTTTGTTTTCTGCTTAC  
ATTTTTTCGTTTTTCTCTTTCTTTTTTTCATGTTTTTTTTTCTTTTTTAGAAGACCCTATCT  
ATAACCCCCACATTATCTCACACAAAGACTAGCGTTTTTAAACGATCCAAAATAAACTA  
AGGGCACTTTTAGTGGCGTATGCCCTGTGTTCTTATTTGAGTTTCATGAAAAATCTAATT  
CTGACCGTTGTTAAACTTTGTTGTTGTTGTTGTTATTTCTTTTTTATCATCATTTGTATTAC  
AGCACCTATCGACTTCTAAGAGTCCCTATTTCTTAACTAACTATGACACACTTGCCTTAA  
TCTAAGAATTTTATTACGTGCTATGCCTCGCCATCTTAAAAGTATCCGAGAACCTAATGT  
GTGTTCATTTTTTATTTTTTTTTTATTTTTTCCCTCCCTTCTTAACTCTTGTTTATAGATGC  
GAACTTAATGCCTCAACATCATTTTGTTTTTTTTCTTTCTCTCCCTCTATATCCTTTTCGTT  
TCCTCTTTTTTTTCCTGAAATTTACGAAATTTTATTTCAATTATTTTTATTGGTCGCACAC  
CGTATAACAATTATATTCTGGAGAGAAGAAATAAACAAAATTAACAGATGTTTTTTTTT  
TATAATTACATATGTTATTTACTCGTTCTGTCTTATGTCACAAAAAGGAATTCATGTGCAA  
CGAAGAATAAAACGATAGGAGCTAAAATAAAAACGAGGAGTGGAAGGATATAGTAA  
ACAAATCAAAACAAATATCAGGAAAGTCGAAGTTAAAAAAAAAAAAATGGAGCACAG  
GGATAAATGGA AAAAATGTTTCGTCTCATTATAGCTAAAAAACTATCTCGCTTAACAATT  
GTAAACAATGACTTAAAACCTCGATAAATCTAAGGACTGTACAAGTCGAAGTACGAT  
GACGCACATCACATTATCAGGCATCATCAAAATTAACCTCAGACTCGCTGTTCTTATTTTT  
TTTTTTTTTTCGCTTAAGCCGACGTTTCGACTAATATTACATTTTTTTTTTTTTTTTTGTTT  
CGTTACTTAAAAACACCTACGTTTTTTTCCTTTTTTATTCTCATCTTTCTACATCAGCCTA  
CGACTACTAGTTGTGAATCTAATCTAAAAAGAGGCTACGCTAAAAATTCTAGAGAAAG  
CTTACGGAAAGCAGCGTTGCTTGGAACCTTATGTTCCAAAAAGAAATTGGTTTTCTTTT  
CGTAAATCACGCCCGGCCAGCCCAAGCACCCGACCCGCGGTGCGCAGCAAGCAGTCC  
TACTATTTATATTACAGTAGATAATATGTTGTAGAATAATATATATTTATTATTAATATGAA  
TAGCCAGTCAGTCTTGACGGGTGCGAGGTGCATAGGCTGAACGGTGCCTCACCTGATG  
CATTTTCCTTTTTTTTTTTTTTTTTTTTTTTTTTTTCTTTACTTTTTTCAACAAGGAGAGGCAGT  
TGTATATATAACCTAACTATCAACTAACTATCTATTTAACTTAATTACTTATCGATTACTT  
CCTATCCAAAATGGTACCTAACCTATATTATAATCAACACTAACTACACATCTCGCAGT  
GTCCTCTTTTTTCGCATTTATATTCTATAACAATAGGTTACGATACATTCACTTGTTTTTT  
CTCACTTTCACTCATTTTACTTTCTCTCTTATCTCACGTTCTGTTTTTTTTCTCTCATCATTC  
AACTTTTTTTTTTCCTTTTCACACATTTTCTTTTTATCCTTCGTTACGCACCTTCATTTATC  
CTTTCAAGTTTCTTTCACTCTGCCTCTTACATCCATGACTCTTCACTCTCTTTTTCTCCTC  
TCTGCCCCGCTCTCCAGTGCGGCTCCGTATCTGCGGGAGCTGGCATTTTTTTGTGCGCCG  
AACCATCGTTCTTCCGCTCGGTCAGCACTATAAAAATGCTGCTCTTCTTTGTTTTGGTCG  
TCACAATAATAATTAGTTATTTAGTACAAGTCTATTAGTAAAATTCTTCAAAATTCATAT  
TTAATCACATGTGATTTTTGTTGTCAGTCGTGGTGACAATCGCTTGTGCAAACAATTAC

ACACTCGCAAATAGGTTTTCCCTTTTCGCTTTTCTTTCTTTTCGTTCTCTCGCTCTCTTATTC  
TTTTTTTCTCTCTTAATGCATGGACTCAAATCGAGTAATAATCGGTCTCTTAAAAAATAG  
CTCATACCATTTTTTTTCATCTTTTCATCTCTTGTCATCAAATCGTGATGTACCAAAATAAAC  
TAAATATATTATTTACTTCAAGTCTCAACAGTGTA AAAATCTTTCATACTTTAGATGACGT  
CAATAATAGTAATCATTAAATTATAATAATACAGCATATTATTGTAATATTATAATAATAGCTA  
CGATCGCCTCTAACTCTATCTAACTACCTGCCCCGCCACTTCGAGCCCAAAGCTCGCAAT  
ATTTGGTAGAAAGCTTTCTGCTAATCGTTCCTCGACTCGATCTAAGTCAGACAACGTGA  
AAACTGTACCGGATGTAAAAACGGGCTTAGAGGAACGCAGGAGAGAAGGGTGTTTTT  
TCTTTTTCTAATGTTTCTCTCTTTTTTCGAGATATCACATAGATAGAAAATTCTCGATTT  
ATATCTTTATTTTCGTTTCTTTTTGTTTCCTCGCGTTCAATCCTCTCGCCTATCGTTCAGCT  
CCAATCCCATTATCTTTTTCGTTTTTCATTTGTAACACGATTTTATTCTGTTTCGTTTCGATATAA  
TAAATTAATTTATACTCTACCTATCATATTCCGTTGTAACAAGCCTACTCTGTTTCTTTCT  
CTTATTTTCTTTTCAGGCGGTGGAAATTATTCTTGTTTACAATGATCCGCCATTTGATTTT  
ATTTTTTTTTTCTTCCTAGACTTCATACAGACCGTACAGATGTTTCCGGCCCATCAATCCC  
ATTAGTGGCAACTATACACATACAAAATCTATTTCGAATTTGTAACCAAAAAACAAACGT  
AGTGATATTTAACTGGCTACAACGTAAAAACAATTATATTCTCTTAACTAGAAGATCAAA  
ATTTGGCTCAAGTTTCGCATTTACATATCGACGTAAAAATATATTATAATTTTTTCAGCA  
TATCCCTGTCTAGCGGATTTGTCTGAAAAGGCACAATTCTAAAAAAAATATCTGTATTCA  
CTGTACAATTAAAACTGATATCGATTTCGTAGTAACTGTACTCATAAATATAAATCTTCTAA  
AAAGTACTATGTTCCTTTCCTTCTTGTTACAATAATTACATATATCCTGAAGTTTTTTTTT  
TCTTTAGAAATAAAGCTTTATTTTTTTCTTTTTCTCTCTTAAATCTTCATTTCTTTTTTCGT  
CCATAAAATATATTCATTCGTGATTA AAAAGAGAACGCGAAAACCGTACTTGTA AAAGTA  
GATAAAATCTCCGCGTGGCAATACATACATACAATATGTGCCTGGCTTGGAATGTCTG  
AACGAAATAGAAGAAAACAAAAAGAAATAATCTGATGAGGGTGCAATTAGTGGAATGG  
GGTGGTGTGTGCTGTTAAGAAAGAGCTCTTTTTTTTATTATTCGAAAAAGAGATACTGA  
TCCATAGCTTCTTCTCTTCGCAGCGCAGCCACCGGCCAGCCAGCTGGCACGAAAGTCC  
AGTAGGTACTGATTATAAGTAACTGAATCTGAATTTTATTTTTCTTTATCAACTCTAGCAT  
TTGGAAGTGCTTTTTTCTCTGTATATTATTATTATTATTCTTGGAAGAATTCTCCTTT  
GTATTTCTGAGCAGCGTTTTTTTTTATAGTTTACAGTTTTTGTTAAATATTTTATTCACAC  
TCTCAAGCGTTCAGCTTCAACTTATCATCTCCTTAATAAATGTAATACCTAAAGTTAATC  
CTGGAAGCCTATTAGCTTGACACTAACTGTTTCGTCGCAGAATATCAGTTTTGTCACTG  
TCGTAATGATGTGTTGGCATTACAGCGTATGGAGCCGTGCTGGTGCCGAACAATGTAGA  
TGACACGAGCACTCGTACCCCTTTCTTATGACAACATTCATTCTCTAATCGTTGGAAAAT  
ATTA ACTACTTTACCTATTTATCTGATGGATAAAATGTATAAAAGATGGCTGGCAAGTC  
AATTATCATGAGGAAGAATCTTATCTGACTTTATGTAAT

>novel\_circ\_000515

ATCTTCCAAACGTTTAAAAATGGAAGCAGGTTACAATTCTCATCCAAATCGTCTCGGTA  
CGGAATCCC ACTATGGAGGAGATAATTTGTTCAACCAAAGCAGACCTTATATGGTCTCA  
TCACCATCATATTATTACACTAGTCTCCACCTGTTACACCACGACCCAAGGGAGATACT  
AGACCTTATATGGTCTCATCACCATCATACTTTTATGTTAGTCCACCACCTGTTACACCA  
CGGCCCAAGGGAGATACTAGCTCTCATATGTCAGAATTATACACGGAAGATAGTCTTGT  
TCGAAGATTAAAGTTTACTCACAAATGCATTAAATCAAGGAAAACCAATTCGTGTTGAAG  
ATCTTATGTGCTTCGATCAGATAATGAGAGTGATCCAAAAGTAGTACAATTATTAGGAG

AACTACATGCTGAACTTCGACTTGCTGCAAATTCAAGATCAAGTGGACTAATAGAATCT  
CAGCTTCCTGTATTAAATCCACCACTTTTAGATACAAATGCAGCACAGTCAGGAACTT  
TGATGCACATGCAGTTTATGCTGGTGATGATGCAATGAGTTCTGGAAGATGGTCACAAG  
TGGCAACAGCTGGTGTTCGCAGTGCATTATTAGCGCTCATGTCGCGCTATGGTTTGAA  
ACTTGCAATCCTTCCCCTGTTATCACCCGACCCCCAG

>novel\_circ\_000516

TGAGAGGGATCTATCTGTGGACGGAGACGAGGCGACACCCGAATCTCGAACAGGCGG  
ACGCCACAGTGGACGGGCGTGTCGTCTAGTGGCGCGTCGTCGAGGGGTGCGGAGGCG  
TTGGCGGCAAGACGGCCGATCGTGCGACGGTGCTGAGTACTATTCCGCGGCTGCGAGG  
ACAAGCAACAGCCCCGAAGATTCTCCCAGCAAAGGGCAAGATGCACATCGAGGTGCAG  
GTGGCGCTCAACTTCGTGATATCGTACCTCTACAACAACTGCCGCGAAGGCGGGTGA  
ACATCTTCGGCGAGGAGCTCGAGAAGGCGCTCAAGGACAAGTTCAAGGGGCACTGGT  
ACCCGGAGAAACCGTTCAAGGGGTGCGCGTTCAGATGCTTGAAGACGGGCGACCCGG  
TCGACCCGGTGCTGGAGAAGGCGGCGAAGGAGAGCGGCGTGCCGATCCAGGACATCC  
TGGAGAACCTTCCGGCCGAGCTGGCCGTGTGGGTGGACCCCGGTGAGGTGAGCTACC  
GCATCGGCGAGATGAACGCGGTGAAGATCCTCTACTCGGAGACGGGGGACCCGCACG  
ACGAGAGCTCGGCCGACCGGGAGGTGACCAAGACGTTCAACCCCGAGGCCAGTGCT  
TCAGGCCGATCGAGGCCGTGGGCACGTCGCTGGGCGGGCTCAGCCTTAGCCCCAAGT  
CCACGTCCCCGTTCCCGAGCTCGTTGGGCAGCAACGCGAGCAACGGGTGCTCCAACA  
ACCAGCAGAGCGGCCACGGGTCCGGTTCCTCGTCGGCGCCCTCGCCGACGCCCATCA  
CCAGCTCGTTCAAGGGCTCGCCCAGCCCCGTTCCGGCCTTCATCCCGCGCACCCACGGC  
GCCGCTCACCTTACCACGGCCACCTTCGCGCAGACCAAGTTCGGAAGCACCAAGTT  
GAAGACGAGCAGCAAACGAGCGAACAGAATGTCGCCGACCGAGTTCTCGAACTACAT  
CAAGCAGCGGGCGATGCAGCAACAGATCCACCACCACCACCACCACCAGCACCAGCA  
GCAGCAGCAGCAGCAGCAACAGCAACAGCAGCAACAGCAGCAGCAGCAGCAGCAAG  
CGGCAGCTGCGGGCGGGCTGCCCCGTTTCGCAGACCTCTCCCCGAAGCCGCAGCCTCTC  
GCCCCGGGAGCATAGTGGCGGGTGGCGGGCAACAGCACACCACGGATCCGAGCGCGTA  
CTTCTTCCAGCACGGGCCGGCCACGTATCACCCCCAATTCCCCCATCGCAACATCTTCG  
ACTCGTCGAGCCACGGCGGCTACCTGTCAGCCGACCTGTACACAGGCGTCAACTTCCC  
GTCGTGCTACCTCGACCCGACCAGATCGCCGGCCACCAGTTCTACGGAGGCAGCGTG  
AACGGGACGAGCAACGGGGCGGGAAGCAACGGAAACACGCAGAGCGGGGGGAATCT  
GGGCCCCGTGCGGTCAGCTGCGACGAACAGCAACGTGAACGGGTCCGGCCAGCAGC  
AGGACAAGACGGCGCTCGTCGAGGGGTTGAACAACCTTTGGCCTTGATCGGTGGCGC  
CGTACCCGGCCAGCCAGTACCAGCACCTCCTCGTAGCCAACTAATACCCCGCGCGAGT  
GGAGACCGAGCGGCTGGCGCGGCTCGAGTCGCGTCTGATCCTCTGCTGCTTCACAGG  
ACAGGAAGGGGAGTCGGGGAGGATAGTATGAGGGGGCCGGGCCGTGCGAGCGTGAG  
CGAACGGGGCCACGTTCCAGCCTCTATCTCGTGCGTCGAGACGTCTTCGTCGTCCAGA  
GTCTAGGTTCCGTACCCTGACACACGTAATACACACACACACACATGTAATACACGCAT  
ACATACAAATACATGAACACACACGTACAACCAGATTTTCGCTTGACCATCCGATCGG  
AGCTCACCTTCCTGCTCACCTACCCACGCTAAATACGTATAGAGTTCCCCACTCTGTCT  
CTCTCCTGGCGAAACGAGCGTCCAATCCAGCAGAACAACAACAACAAGCGGCAA  
GGTCGGTAGCTCTGCATTGCTAGTGCAACGATACCCTCCCCTCCTCCCCTCCCACCCGC  
CCCTCTTCGAAGATCATCGCGACGACGCCCGAAGCTCATCGACTCCTGTCTTCTCCGAT

```
>novel circ 000517
```

TGAGAGGGGATCTATCTGTGGACGGAGACGAGGGCGACACCCGAATCTCGAACAGGCGG  
 ACGCCACAGTGGACGGGCGTGTCTAGTGGCGCGTCTGTCGAGGGGTCGCGAGGCG  
 TTGGCGGCAAGACGGCCGATCGTGCACGGTGCTGAGTACTATTCCGCGGCTGCGAGG  
 ACAAGCAACAGCCCGAAGATTCTCCAGCAAAGGGCAAGATGCACATCGAGGTGCAG  
 GTGGCGCTCAACTTCGTGATATCGTACCTCTACAACAACTGCCGCGAAGGCGGGTGA  
 ACATCTTCGGCGAGGAGCTCGAGAAGGCGCTCAAGGACAAGTTCAAGGGGCACTGGT  
 ACCCGGAGAAACCGTTCAAGGGGTCGGCGTTTCAGATGCTTGAAGACGGGCGACCCGG  
 TCGACCCGGTGCTGGAGAAGGCGGCGAAGGAGAGCGGCGTGCCGATCCAGGACATCC  
 TGGAGAACCTTCCGGCCGAGCTGGCCGTGTGGGTGGACCCCGGTGAGGTGAGCTACC  
 GCATCGGCGAGATGAACGCGGTGAAGATCCTCTACTCGGAGACGGGGGACCCGCACG  
 ACGAGAGCTCGGCCGACCGGGAGGTGACCAAGACGTTCAACCCCGAGGGCCAGTGCT

TCAGGCCGATCGAGGCCGTGGGCACGTCGCTGGGCGGGCTCAGCCTTAGCCCCAAGT  
CCACGTCCCCGTTCCCGAGCTCGTTGGGCAGCAACGCGAGCAACGGGTTCGTCCAACA  
ACCAGCAGAGCGGCCACGGGTCCGGTTCCTCGTCGGCGCCCTCGCCGACGCCCATCA  
CCAGCTCGTTCAAGGGCTCGCCCAGCCCCGTTCCGGCCTTCATCCCGCGCACCACGGC  
GCCGCTCACCTTCACCACGGCCACCTTCGCGCAGACCAAGTTCGGAAGCACCAAGTT  
GAAGACGAGCAGCAAACGAGCGAACAGAATGTCGCCGACCGAGTTCTCGAACTACAT  
CAAGCAGCGGGCGATGCAGCAACAGATCCACCACCACCACCACCAGCACCAGCA  
GCAGCAGCAGCAGCAGCAACAGCAACAGCAGCAACAGCAGCAGCAGCAGCAAG  
CGGCAGCTGCGGGCGGGCTGCCCCGTTTCGCAGACCTCTCCCCGAAGCCGACGCTCTC  
GCCCCGGAGCATAGTGGCGGGTGGCGGGCAACAGCACACCACGGATCCGAGCGCGTA  
CTTCTTCCAGCACGGGCCGGCCACGTATACCCCCAATTCCCCCATCGCAACATCTTCG  
ACTCGTCGAGCCACGGCGGCTACCTGTCAGCCGACCTGTACACAGGCGTCAACTTCCC  
GTCGTCTGACCTCGACCCGACCACGATCGCCGGCCACCAGTTCTACGGAGGCAGCGTG  
AACGGGACGAGCAACGGGGCGGGAAGCAACGGAAACACGCAGAGCGGGGGGAATCT  
GGGCCCCGGTCGGGTTCAGCTGCGACGAACAGCAACGTGAACGGGTCCGGCCAGCAGC  
AGGACAAGACGGCGCTCGTCGAGGGGTTGAACAACTTTGGCCTTGATCGGTGGCGC  
CGTACCCGGCCAGCCAGTACCAGCACCTCCTCGTAGCCAACTAATACCCCGCGCGAGT  
GGAGACCGAGCGGCTGGCGCGGCTCGAGTCGCGTCTGATCCTCTGCTGCTTCACAGG  
ACAGGAAGGGGAGTCGGGGAGGATAGTATGAGGGGGCCGGGCCGTGCGAGCGTGAG  
CGAACGGGGGCCACGTTCCAGCCTCTATCTCGTGCGTCGAGACGTCTTCGTCTGTCAGA  
GTCTAGGTTCCGTACCCTGACACACGTAATACACACACACACATGTAATACACGCAT  
ACATACAAATACATGAACACACACGTACAACCAGATTTTCGCTTGCACCATCCGATCGG  
AGCTCACCTTTCCTGCTCACCTACCCACGCTAAATACGTATAGAGTTCCCCACTCTGTCT  
CTCTCCTGGCGAAACGAGCGTCCAATCCAGCAGAACAAACAACAACAAGCGGCAA  
G

>novel\_circ\_000518

TGAGAGGGATCTATCTGTGGACGGAGACGAGGCGACACCCGAATCTCGAACAGGCGG  
ACGCCACAGTGGACGGGCGTGTCGTCTAGTGGCGCGTCGTCGAGGGGTTCGCGAGGCG  
TTGGCGGCAAGACGGCCGATCGTGCGACGGTGCTGAGTACTATTCCGCGGCTGCGAGG  
ACAAGCAACAGCCCGAAGATTCTCCAGCAAAGGGCAAGATGCACATCGAGGTGCAG  
GTGGCGCTCAACTTCGTGATATCGTACCTCTACAACAACTGCCGCGAAGGCGGGTGA  
ACATCTTCGGCGAGGAGCTCGAGAAGGCGCTCAAGGACAAGTTCAAGGGGCACTGGT  
ACCCGGAGAAACCGTTCAAGGGGTTCGGCGTTCAGATGCTTGAAGACGGGCGACCCGG  
TCGACCCGGTGCTGGAGAAGGCGGCGAAGGAGAGCGGCGTGCCGATCCAGGACATCC  
TGGAGAACCTTCCGGCCGAGCTGGCCGTGTGGGTGGACCCCGGTGAGGTGAGCTACC  
GCATCGGCGAGATGAACGCGGTGAAGATCCTCTACTCGGAGACGGGGGACCCGCACG  
ACGAGAGCTCGGCCGACCGGGAGGTGACCAAGACGTTCAACCCCGAGGCCAGTGCT  
TCAGGCCGATCGAGGCCGTGGGCACGTCGCTGGGCGGGCTCAGCCTTAGCCCCAAGT  
CCACGTCCCCGTTCCCGAGCTCGTTGGGCAGCAACGCGAGCAACGGGTTCGTCCAACA  
ACCAGCAGAGCGGCCACGGGTCCGGTTCCTCGTCGGCGCCCTCGCCGACGCCCATCA  
CCAGCTCGTTCAAGGGCTCGCCCAGCCCCGTTCCGGCCTTCATCCCGCGCACCACGGC  
GCCGCTCACCTTCACCACGGCCACCTTCGCGCAGACCAAGTTCGGAAGCACCAAGTT  
GAAGACGAGCAGCAAACGAGCGAACAGAATGTCGCCGACCGAGTTCTCGAACTACAT

CAAGCAGCGGGCGATGCAGCAACAGATCCACCACCACCACCACCACCAGCACCAGCA  
GCAGCAGCAGCAGCAGCAACAGCAACAGCAGCAACAGCAGCAGCAGCAGCAGCAAG  
CGGCAGCTGCGGGCGGGCTGCCCCGTTTCGCAGACCTCTCCCCGAAGCCGCAGCCTCTC  
GCCCCGGGAGCATAGTGGCGGGTGGCGGGCAACAGCACACCACGGATCCGAGCGCGTA  
CTTCTTCCAGCACGGGCCGGCCACGTATCACCCCCAATTCCCCCATCGCAACATCTTCG  
ACTCGTCGAGCCACGGCGGCTACCTGTCAGCCGACCTGTACACAGGCGTCAACTTCCC  
GTCGTCTGACCTCGACCCGACCACGATCGCCGGCCACCAGTTCTACGGAGGCAGCGTG  
AACGGGACGAGCAACGGGGCGGGAAGCAACGGAAACACGCAGAGCGGGGGGAATCT  
GGGCCCCGGTCGGGTCAGCTGCGACGAACAGCAACGTGAACGGGTCCGGCCAGCAGC  
AGGACAAGACGGCGCTCGTCGAGGGGTTGAACAACCTTTGGCCTTGATCGGTGGCGC  
CGTACCCGGCCAGCCAGTACCAGCACCTCCTCGTAGCCAACTAATACCCCGCGCGAGT  
GGAGACCGAGCGGCTGGCGCGGCTCGAGTCGCGTCTGATCCTCTGCTGCTTCACAGG  
ACAGGAAGGGGAGTCGGGGAGGATAGTATGAGGGGGCCGGGCCGTGCGAGCGTGAG  
CGAACGGGGGCCACGTTCCAGCCTCTATCTCGTGCCTCGAGACGTCTTCGTCGTCCAGA  
GTCTAG

>novel\_circ\_000519

TGAGAGGGATCTATCTGTGGACGGAGACGAGGCGACACCCGAATCTCGAACAGGCGG  
ACGCCACAGTGGACGGGCGTGTCGTCTAGTGGCGCGTCGTCGAGGGGTGCGGAGGCG  
TTGGCGGCAAGACGGCCGATCGTGCGACGGTGCTGAGTACTATTCCGCGGCTGCGAGG  
ACAAGCAACAGCCCGAAGATTCTCCAGCAAAGGGCAAGATGCACATCGAGGTGCAG  
GTGGCGCTCAACTTCGTGATATCGTACCTCTACAACAACTGCCGCGAAGGCGGGTGA  
ACATCTTCGGCGAGGAGCTCGAGAAGGCGCTCAAGGACAAGTTCAAGGGGCACTGGT  
ACCCGGAGAAACCGTTCAAGGGGTGCGCGTTCAGATGCTTGAAGACGGGCGACCCGG  
TCGACCCGGTGCTGGAGAAGGCGGCGAAGGAGAGCGGCGTGCCGATCCAGGACATCC  
TGGAGAACCTTCCGGCCGAGCTGGCCGTGTGGGTGGACCCCGGTGAGGTGAGCTACC  
GCATCGGCGAGATGAACGCGGTGAAGATCCTCTACTCGGAGACGGGGGACCCGCACG  
ACGAGAGCTCGGCCGACCGGGAGGTGACCAAGACGTTCAACCCCGAGGCCAGTGCT  
TCAGGCCGATCGAGGCCGTGGGCACGTCGCTGGGCGGGCTCAGCCTTAGCCCCAAGT  
CCACGTCCCCGTTCCCGAGCTCGTTGGGCAGCAACGCGAGCAACGGGTGCTCCAACA  
ACCAGCAGAGCGGCCACGGGTCCGGTTCCTCGTCGGCGCCCTCGCCGACGCCCATCA  
CCAGCTCGTTCAAGGGCTCGCCCAGCCCCGTTCCGGCCTTCATCCCGCGCACCCACGGC  
GCCGCTCACCTTACCACGGCCACCTTCGCGCAGACCAAGTTTCGGAAGCACCAAGTT  
GAAGACGAGCAGCAAACGAGCGAACAG

>novel\_circ\_000520

GACGATTTGCGGGAGCGTCGACCGAGCCACGGAGTGTCTCGTGGCCATCGCGAGAGA  
AAAAAAAAAGCGCGGAAGTCTCGCGTCCTCTTCCTTCCGTTATAAATAAAGACCATCG  
AACCGACTTTCAAGAGTCGCCCTCTTCGTGCCGGCCATTTTTCATACACACACACAGA  
GTGCCATAATCGTCCAAAATAAGAGGAATTTTTGCCAAATCATCGACACACCATTGAAA  
TTTTCAAACGATCAAAGTGATACGGAAATCCTGCCATCTTGAATATCTACTTATACCTT  
TTTTATCTTAGCAATAATTAAGGATAAAGGGGAAAGAAGGAAATTTTTGGGAAAAAAA  
GTGCAAGTGACGACAATCAAGATCGATTAATTAATCTCTATCGTTTATCCGTCTATCTA  
AATCTATTGAAATCGCGTAAATAAACGGATAATCGGGTGCAGCGAGCACGGTAGCCG

CTGCCAGAAGCGCATAGTGGATCCCATAAATTTTCCTCGGCGATCGTGAACGCACTAAA  
CGCCGAGCCGTGGAGCTGCCTCGAAGTAACAAGCGACGCGAGCCGACCTCTCGACCG  
GGCAGTCGTCAGGATGTTTCAGCTGGCCAGCAGCCGGTAGCTTCGTTGCCGGGCCTGG  
TTGCGATCCTCAGTCCTTGGAGGCGGAAAAAGCGGGGCCGTTTCAAGGATCGGCCGTC  
GACGATGTCCATACGCGTGAGCGGCGTCTACCTGGTGCCAAGCCCGGCGGCCAACAAAC  
GAGCCGGCCAATGAAAAACCGAGCAACCTGTGCGTGGAGAACAATCTTCACCAACAG  
CATCATCATCATCATCATCACGCGGCGAAGACCGTGACGATCGTCGCCGGACCACA  
GAGGAGCAACAGCCTGGATTATTTAAATTTTCGAGGAGAAAAGGCAGATCATCGCGTCG  
TCGTTATCGTTGAGCGATTTTTTGGCTCATGGGCCGGCAGCTGCCGCAGCCGCTGCGAA  
AGAGGTCGCTGCCAACACCGTTATCGTGACAACGACTTGGAATGGATAAAGCGAAAA  
AACAAAATGGGGCGGCATTGCGAACGAACAGTTTGGGCTCTGGGGCGCGGACACCAC  
CCCTCGAGAGGAAAAGCAAATTTTCAGCCCTCGGTAGACTCTTCAAACCCTGGAAGTG  
GAAACGGAAAAAGAAATCGGATAAATTCGAGGCTGCCTCATTGTGCTCGAGAGGAA  
AATCTCTGTACGAGCAAGCAGAGACGAGCTGGTACAAAAAGGAATCTTGTTGCCTGTC  
ATAAGGTCCACGTCGTTTCCCGAAAATGAGACGGGTGGCGACTCGCCGGACAGCCAG  
AAGCCGCCGACGCCGCAACAAACGCCCCAACAGCAGCAGCAGCAGCAACAGCAACA  
GCAACAGCACTCGCACCAGCAGCAGCAGCAGCAACAACAAGGGAACATCGGTGGTG  
GAGGCACCCCTGCAGCAACACCCACGTCGGCCGTGGGCAGCGTGCAGCAATCCCAAC  
AATCCCAGCAAGTAGCATCGGCCACGCCGACCCCCACGACTGCCAATCCGCATTCTAC  
AGGACCGCCAGCAATCAACCCTCGCCTCATCCCTCGCCCCCTTTATCCGGGGATACCGC  
AGCCTGGCCAGCCCAACGGCAACACGCAAG

>novel\_circ\_000522

CGAAAAAACAAAATGGGGCGGCATTGCGAACGAACAGTTTGGGCTCTGGGGCGCGGA  
CACCACCCCTCGAGAGGAAAAGCAAATTTTCAGCCCTCGGTAGACTCTTCAAACCCTG  
GAAGTGGAACCGGAAAAAGAAATCGGATAAATTCGAGGCTGCCTCATTGTGCTCGA  
GAGGAAAATCTCTGTACGAGCAAGCAGAGACGAGCTGGTACAAAAAGGAATCTTGTT  
GCCTGTCATAAGGTCCACGTCGTTTCCCGAAAATGAGACGGGTGGCGACTCGCCGGAC  
AGCCAGAAGCCGCCGACGCCGCAACAAACGCCCCAACAGCAGCAGCAGCAGCAACA  
GCAACAGCAACAGCACTCGCACCAGCAGCAGCAGCAGCAACAACAAGGGAACATCG  
GTGGTGGAGGCACCCCTGCAGCAACACCCACGTCGGCCGTGGGCAGCGTGCAGCAAT  
CCCAACAATCCCAGCAAGTAGCATCGGCCACGCCGACCCCCACGACTGCCAATCCGCA  
TTCTACAGGACCGCCAGCAATCAACCCTCGCCTCATCCCTCGCCCCCTTTATCCGGGGA  
TACCGCAGCCTGGCCAGCCCAACGGCAACACGCAAG

>novel\_circ\_000523

AGCCGAAGAAGGAAAAGACTGAACAGAGTGCAAATGGCGCGGTATCGCCGAGCGGT  
GAGCCGCAACCGAATCAGGGCACGGCTACGACCGGTAGCTTGCCGATCTCGGCCGCG  
CCCCGAATTCAGGGGACCAGCAAAAGCCGAGCAGGCCGAACACCCTGGAAGCCAG  
GGTGGTGGCCAGGAGACTGATCTTGTTTCGACATGGAGAAGGGGGTCTAGACCAAAG  
CAGCGAGAACCAGCAGGTGATCGAGAGGTGTTACCCTCTTCCGCCCCAAAACAGTT  
GATGCTGTCGGAACCTCCGGAACCGCCGATTCCGCTCAGCGAGATCGGGCCGATCCCA  
CCCCCTCCGATGTTTCAGCTCCTCGAGTCCAACCCTCTTGTTGGCCAAGCAACGGCAAA  
TAAGAAACCCTTTGTCGTCGGACTACGAGGACGAAGAAGACGAAGAGGACTTCGACG

TGGAGGAGGAGGACAACATGTACGTGCCGAGGATGTCGCAGCCTGATCCGACCATCG  
ACACGTCCAGGGTGGAGGAGATCCCCGCGAAGGAGCCTAAGTTTCACGCGGTCCCTTT  
GAAGAGCGTTCTGAAGAAGAGGGGTTCCGGAAGTGGGCCTGGCACGCCCCAGAACA  
CGCCACGCAGGAGAACAGGCCGTTGACCCTTCGCCAGGAGCTGCACGCCTCCTTCA  
AAAGGCCACCGTTGAGGCCTAGGATGAGAATATGCAGTCGACCGGTTAGATTTCGGCCT  
TGCTCTTCCATGCACCCTCGAGAACAAGGAGAACGCGAGGCCGTATGTGATAAGGGAG  
GATGCGGATGGTGATTGAGGGGATGGACAGGTGCTCTATAGGGACGAGTACGACGATG  
AGAAAAGCCGTTGGCAGCAAAGATTGCGCGTAAGGAGTCGCTGTCCCTGAAACTCG  
CCCTGAGGCCGGACAGGCAGGAGCTCATCAACAGGAACATCCTTCAGCTGCAGACGG  
ACAATGAGAGGCAGGAAACGAAGGAGGCAATTGGTGCCAAGCTCATCAG

>novel\_circ\_000524

TGGAGAAGGGGGTCCCTAGACCAAAGCAGCGAGAACCAGCAGGTGATCGAGAGGTGTT  
ACCCTCTTCCGCCCCAAAACACGTTGATGCTGTGCGAACTTCCGGAACCGCCGATTCC  
GCTCAGCGAGATCGGGCCGATCCCACCCCCTCCGATGTTTCAGCTCCTCGAGTCCAACC  
CTCTTGTTGGCCAAGCAACGGCAAATAAGAAACCCCTTTGTCGTCGGACTACGAGGACG  
AAGAAGACGAAGAGGACTTCGACGTGGAGGAGGAGGACAACATGTACGTGCCGAGG  
ATGTCGCAGCCTGATCCGACCATCGACACGTCCAGGGTGGAGGAGATCCCCGCGAAG  
GAGCCTAAGTTTCACGCGGTCCCTTTGAAGAGCGTTCTGAAGAAGAGGGGTTCCGGA  
AGTGGGCCTGGCACGCCCCAGAACACGCCACGCAGGAGAACAGGCCGTTGACCCTT  
CGCCAGGAGCTGCACGCCTCCTTCAA

>novel\_circ\_000525

TCGACCGGTTAGATTTCGGCCTTGCTCTTCCATGCACCCTCGAGAACAAGGAGAACGCG  
AGGCCGTATGTGATAAGGGAGGATGCGGATGGTGATTGAGGGGATGGACAGGTGCTCT  
ATAGGGACGAGTACGACGATGAGAAAAGCCGGTTGGCAGCAAAGATTGCGCGTAAGG  
AGTCGCTGTCCCTGAAACTCGCCCTGAGGCCGGACAGGCAGGAGCTCATCAACAGGA  
ACATCCTTCAGCTGCAGACGGACAATGAGAGGCAGGAAACGAAGGAGGCAATTGGTG  
CCAAGCTCATCAG

>novel\_circ\_000526

AAAAAAAAAAGAAAAGACGCTGCGTTTTTCGATCCAGATTCGTTTTGTTTTTGTGTGT  
TAGTTTGTACGCACTACGATTTATCGCAATTTATTGTATTATCGATGAAATACTGTAACAA  
AAATACTGTAACTATTCTTAAAAAAATTAAACTTTTTGTAAACTGAGA

>novel\_circ\_000527

ATGTTTCAGATGCATCCGCCATCGCGGTATCGCCGCGTATCGAGGCGAATCAAAGGTAC  
GACACTTGAGCATCTGCGACGATCGAGTTCCATCCACGGGGGCCAATCATCTTCGAAG  
AGGATCGAACCACGCGGGATCCAAGAGGAATGGTCCCTTGGGCCTTTGGCGTCCCTCT  
CGTCCTCGTTTCTGCTCTGGGTCTTTTCCTAAACGGTTACGTGCTCCTCGTGTTCTCG  
GGCTGGGTAAACAGACGCAGCAGCAACAAACGCCAATACTTTGTTGTTGATACTT  
GGGCGCGGTGGAGGCGGCTGTGTGCCTCATATTACTGATCTTACCCTGGTTCCCTGGC  
CAATCGCCGGCACCTGGTGCGTCCTACACGGTTTCCTTTTGGCTCTCTTACACCCGGTC  
GCCCTCTGGACTGTCACTGGATTGAATTGCGACAG



>novel\_circ\_000528

AACTTGAATTGGTAAAACTGCCGGAAGATATGACTTTGGCAGGATTCACTCCGTTGATG  
TCAAATCCTCAAGATCCTTGTATGCCGAGAAGAACGAAGATATGGAAGTCGCTCAAG  
TGTGTCTCAGGATAAACAAGATTCTGTTCTTCGGCCAAGTGTTTCCTGTGCGGCCTCGAG  
ACACCGGTATTGAAGTTGCAAAAGAGCGAAACTGGCGTAAGCGAGTACGTTTCTGTGG  
TAGAGGCTTCGAGCACAAAGTACGCCGAGTTCACCACCGGAACAGAGCGACTCCGAGC  
TTCTGGTAGAAAGTTACAGCGAGGGTGAGGATGAGCCTGTATCCACCATGAGGAGATT  
ACCCTTGTGCACAGACGTACCTGACGATAGTACCGCCCCCGTGGCTGCGGTCGAGATA  
AGGTCGCTGATCGAGAGAAAAGAGGAACTTGAGAGGCGGCAACGGAAACAGGATCG  
TCACAGGCAACGAGTCCAG

>novel\_circ\_000529

AACTTGAATTGGTAAAACTGCCGGAAGATATGACTTTGGCAGGATTCACTCCGTTGATG  
TCAAATCCTCAAGATCCTTGTATGCCGAGAAGAACGAAGATATGGAAGTCGCTCAAG  
TGTGTCTCAGGATAAACAAGATTCTGTTCTTCGGCCAAGTGTTTCCTGTGCGGCCTCGAG  
ACACCGGTATTGAAGTTGCAAAAGAGCGAAACTGGCGTAAGCGAGTACGTTTCTGTGG  
TAGAGGCTTCGAGCACAAAGTACGCCGAGTTCACCACCGGAACAG

>novel\_circ\_000530

ATCCAGAAAGCGGCGACCCAGCTCGAGCAACGATTCTGAACGATCGTTCAGCGGTTG  
GAGCGAGCGAATACCCACGGATGTGGTCGCGAGGGGTGTCGCACAAACGAGCGCGG  
CGACTGCATGGACGAATGCACAGCCGCGCTAGTTCTCATGTCGCTCTCGTGCTCGCCA  
CACAGCCCTACAATCCTTTACCGTTACACTGCCAACATAATTACGGTTCCTGGGGAGG  
TCGAGGAGGCGGAGGTGGCGGCATGGTGGTCGGCTCGCCGGGAGTCGGCGGCACGTC  
CAACAGCAGCAGCAGCAGCGGGGCTTCGTGGCGTAGCGGCACCCCGAGCCCCCCCCT  
CAGCGACGAGGGGGCGCCCAGTTCCTGTGGCCGACCTCGGCCCACTCCTCGCACAA  
TCAACAGCACTACCCTTACAACGTGTCCGGATCGTCGTCGAGCAGCACCCCAAGGCTCG  
ACCACCACTCTGGACGAGGGCATAGTGCCCGACTACCTCGAGGAGCAACACCCCCGA  
AAGAAGAAG

>novel\_circ\_000531

GCTAATGCAGCGGTAGTATTTAAATGTACTTGGCCAGGTTGTTTAGAAATAAAGGCGAC  
CGTGCCGCTTATCGAGGAGCACGTGCGCCAATCACACTTAGGACCTAAAAAGACTAAC  
AGTTACGATAACGAAGAGGACGATGACATTTCCGATCACGAGGAAGAATTCTACTATC  
AGGAGGTGGCGGTGGATCATATGAGCTCTCCGCCGACTATGTCGCACAGGGACATGGC  
CAGACCTCCTCACGAGGATCCAGAGTACCAGAAACAGCTTCGTTTGGAACCACTTCT  
GCCACCAATAACGCAGAAAGCATGATGGTGAGCATCAGAGAACGAATCGCATTGCCA  
CTTCGCAATCACCGGGTACACCGATCAAGCATATAAAGTTGTCACCCAGGCCATTCCAG  
GCGTACCAACAGAGCATGGGCCTGCTGACGGTGTCCACGGGAAAGATGCCATCGTCGC  
CCCGACGATTTCGCGGCGAGACGAAGAAGTGCCGCAAGGTCTACG

>novel\_circ\_000532

ATATTAAAGAAATCGAGGTGAACAATCAACTCGTGGA AAAAAGAAAAAAAGAAAGAAA

GAAAAGAAAAGAAAACGTGAGTGTGCGAAGAAGAAAACGATCTTTGATGAAAAGAATA  
ATAATCTTTAATTGCCCGGAGTCTTTAACAAACAGTAAAAAATTATTAGAGAGAAAAAA  
GATTGTTTGACCATCCCCAACGATGGACATTGTTTGCCAAAAGAAAGATAGACTATAAC  
CTGGATACACGAACCATGTTTATTCCTTTCTTCCTAATATTAATTCGAAAAATATTGCGGT  
CAGAAGAGTATTGATCTCTCTACAGACGTGAGAGAACCCCTTTCAATATTTTTTTTAGC  
GTTGGAACGTCGCGTTAACGTGCTGAAGAAAAAGAAAATTAAGTATACACACAGAGA  
GAAATAACAGGAACCTGAAAGAATATTATACCAGAAAAAACAAATGAGAATACAATCA  
AAGAGGAATAAACGATTCCCCAAAAAAGAAGGAAAAGAAGGAAATTGTAATTGG  
AAATGGTGCAAGCGTGACGAGACAGGTGAAACAAACCATAATTTTACATACCAATCTT  
ATGAAGAATAAAGAATGAGTTGAACACGATGCATAGACATACAAGTGGAACGTGATAC  
CTTTCAAGCTCAACTTCATTAAGACCAACCTAACAAAAACAAAACAAAAACAAAAACA  
CAAATAAAAAGAAAACAAAAAAATGATGTAAACGAATTTACAGAGGGAGAGAAAACT  
AGGAAAAAATCAACGAGACACTGGCCACCTATACAACCAATCAACAAATACACTCAAT  
TCTCCCTAAAAAACAAAAGGATCACAAAAAAAAGACAGGAGAAACAAAACGTAGT  
ACATACCAAACCTTTTTGTAAGGAAACAAAAAGTGTGAATCGAATAGAGACAAAAGAA  
ACAGCGATGTGACCCCAATCACATCCTCTAACCTCCACCTTAAACCAAGGTCGAATTCA  
TTAAACTAAACCAAAGCAAAAAGAAAAGAAAAGCCAACAACTTACTTACTAAAGA  
AAAAGAGAAGAAAACCGATTGATACGCACAGACAAAAAGTATATACCCCCAGAAAATT  
CCCCTTCTCCTGTTCCAAGAAAGAAAAGAGAAAAAGAATCAAACCTCGAAGGAGCGA  
GGAGTGACACGAGGCAGGTGGAAAGCAACTCTCTTATGGAGAGGCAGAGTAGGGAGC  
GGAGATAAAACAGAGAGACAAGAGGAGGAGAGATATATAATGGTGGCGCATGCTCCCC  
CCAGTTGTGCACGTATTGTAGAGCAGGCAGTTGCCCCCGTCGGCTCCAGGTACACGCG  
AAAATCCATATCGACGCGGTGTACCGTCTCCTACGGCCGTTGACAGAGGCACACGGCC  
GGCCGCGCGCCTTCGGTTTTACCCGTCGTCGCGACGCAGCTTCCTCGCCGACTTACG  
CGCCGATCCTGCACACCGCGCCGAGGTGTTGCAAGGCTGCTTACGCCGCTTCGAGCCA  
CGTGCCGCTGCCGCAGTCGCGTGTCACTGCTCGAGCGGACCTCTCGAGCAGAGGGAA  
GGGAAAGGGAAAGGGTTTCGTCCCCCAAATCGAGACGATGTGACACTTCTCACGAA  
TGTAATAATCATCTAATCGTCCACTTCGAAGATAAATTCAAGGGAAGTTTTTTTCTTTTT  
CTTTTTTTTTTTTTTCCCCTCCCCAAAAGAAGGAAAGAAGGTTGTTCCAAACGAGAATT  
TTATCAAGAGAATTTTATCGCTCGCCGCTATGAAGAGGGATTTGGATGCAAATGGAAAA  
GGGACACGTGTTTTCAACGTCTGACGTCCAAGGAAGAGATGTTTAGGAACAATTCGAA  
ACGAGTGAATGGACATATTTTGTACGTCTATCATGTTTTCTTATGATATATAAATAGTACA  
CGAGTTATTTTGAAGGGAAAGGAAAGGGAGAGAGAAAGAAGAAAGGAGGATATTAT  
CGAAGAAGATTAATCGAAGAAAGTTATACACGTTTCGTGATAAATACGAGTTTTAATTAA  
GAGGATATTATTTATTATAATGTTGTTTATAATTATTCTCGAAAAAGAGATAATTGGATAA  
ATTTTTCATGAAAGTAGAAGACGATGAACATTTTATTCTAAAGAAGAATTCCTTTGTTTC  
TGAAGGAAAAAATAATTAGAAACGATCGAAATAACTTCAAACCTCCAACGTTATCGATAT  
GAAACCTCTATGAAAAATAAATTTCAAAGGATTACGTTACGTTAAAAACGGAATTGG  
AAAGAAAAGGCTCGACGTCTCCAACACACTTACCAGATAGAACCGTAAATAAATAAAT  
AACGAAGTTTTCAAACCTCATCCATTGAAAGTTCACCAAGTGATGGAGGAATAGCATT  
TTAAAGAAGACGGGGCGTACATCGACTTGTTCCATCGGGGCGGATAAACGTAGAAACT  
TCCCCGTCTCGAAGAAGAAAAGATTTCGAGAGAAATCCTCGGGAGAATTTCAAAAGTT  
CCCCTTTAGTGAAAAACAAACGAAAGTAGCCGCACAAATTGTGTAAATTTGCACAAA  
TTTCTCAATCATCCCCGGAGAGATCATTTTCGTCCATCGATATTTCAATCATATTATCGATA

TTTCGAAAGGCAGAGGCGGAATGAACGTTTTTAAAACTCGTTTACGAACCTCTATCGAC  
TATTGATTACAAGGGACTCTGAAGGGAGAGATTCCCTCCTTGCGTCGTCGAGTTGAAATC  
AGGGGGCGGTTGCAACGTCCTCTTTTTTCCCCCTTTTCACAAGGTGTAGCAGTCTCTCG  
ATCGAAACCCCATCGTATCGGTTCCCGAAACTCGACGCACGCCCTTTTGTTTCGTGGCAA  
GAACAATAGAGGGATGAAGATCACGCTCGATGACAGACGTCGTTTCGATAATTGGATCT  
CGACCAATTCGGAAACATTTCTTCTTATTCAATTTCTATCTAGGAAAACGTCTATTAGAAT  
AAATCGAAGAAATCTCTCCAAGAGATATCGTTAACGATAATCCTTTGAATAAAGGGAGA  
GGATTATTTTCTTAAAGTGTAATCATCAAGTGAACATAAAAAAAGAACTGTAATCCAG  
TGGAACAACAATTCAGACGTTTAGAAATTGTCGAGTTTCTCTCTAAAGTTTCCCTTTGT  
GGCGTAAGGATATATTTTGAAGGGATATCTCCTTCTCTCCTTCGCTTTGACGAAGGAATT  
CAATGAACTCGGAATCCGACGAAATCGATCTCCGATTTCCAACCATTTGTAAATAATC  
CCGCGAAAACCTTTGCCCAATCGAGACAGAAGAGATGTGTATATATATATAGTAATAATG  
TATAATAATGTTGTAAAATCACGTTTCGATATGAATCGCGCGTGTAAGATCAACATCG  
TTCTTCAAAGATTAATTTTCCCTCTCCTCTCCCCCTCTTGCTCTCCACAGTTTGCGGAAAG  
GAATCCTCGAGGATTAACCTCCTTTAATGGCCCAAGGATCTCGGAGGAGGATCAAGC  
AGGCATTAGTCGTGGAATCGATGAAAATATTCTTATATCCCGAGTGATACAATTGATCAG  
TGGAATAAATAAGAGTGATCGAGGAGAAAGGATTAAGTTTCCTCTTAATCGAACTAT  
CACAGATCGACATTGCATTTGGGAATGGAAAAATCGTGAGTTTCGATCTTTCTTTCTTT  
TTAACATTCTCGAATTCGATTCACGAAGAGTGTGTTAAGATTGGAAAGAAGAGATGTTA  
ACGAATCATATACGTGGATCCTTGAAAATTTTCCCTCGAATTAATATCGAAGATAAATTT  
TCTTTAAGGAGATATCTTGGAATAATTGGTTTTAAAGGAGCCGTGTAAACGATAAACATA  
AATTCTTCTTCGATCTCTTTCCGTCTTTTCGAAACGAACCCGATCGGAGAAGCGAAACGT  
TTCGGTTAAGAAGGAAGGAAGCATGAGCTGGCAATCGAGCAACGAGACTGTTCTCGA  
CAACGGTAATTACGTGCTGAACACGTTGCATTATATCAACAAATTGAACGAGTCTGTGA  
ACCCAGAGGCGATCGAGTGTCTGGAACGTAAGCATAAGGAGGAGTTGGAAAGGTTGT  
CGTTGGGAGGGATACTGGAGGAGGATCAACAGGGGTGCGAGATCAGTTGGGACTCTTT  
ATTGTGCTGGCCTAGGACACCTCCTGGAACACTGGTCACGCTACCATGTTTCGATGAAT  
TGAATGGGATCCGCTACGACAGCACCC

>novel\_circ\_000535

AAGATTAGCTGATGTGAATTGAACACACCTTGAAACACAGAAAATTGAAAGAGAAAA  
ACACTGAGAAAAAGAAAACATATATAATATGCAGCGGATGTGGTTTATAGAGAACAAA  
GAGGACGGGGAATACAAGCAGCAAGAGGAGCCACGTGAGACTAACTTCATCGAGGTG  
GCAACTGAACATACATCAGACATGAGGGGATCTAAAAGAGATTGGATTTTTAGAGTCC  
AAGTACATAAAGTAGAAAAAAATGAAGTTTTGTATGTAGTGGGTAATTTGCCTGAACTG  
GGTGCTTGGAATCACAATCAGGCAATTCAGTTGTCACAGGAACATGGCAGTCGGGATT  
CTCCTATACTTTTTGACAGTAATAGTAGTGGAGAATTTTATAGTGACGATGGACATGACA  
ATGCTGGAGATAATTCATTTGGTGATATAGATGATGAAGGTGGAAGAATTTTTACAA  
AAAGTTGCACTTCCCATTGATGCTGATGTAGAATTCGATATTTTGTTGCTGTCATCTGT  
CATTCTAATGGTACTAAAAATTCGGCCAAGACTCTTATTATTCGTAGATGGGAGACTCAT  
ATGACACCACGCTTTATTAAGAAAAATGCACCTAGCAATTTTAGTAGTGACACATTGCC  
TGATCCAGACAAATTTGGTTATTATAATGGCTACTGTAAAATTGAACGAGGGTGGTTGA  
CCGATGAAACTGTGATACAATTTAAGCTTTTTAATAATCCAATTAAGTTATGGAAAAATC  
GATTACAAAATAGAAAAGTTCACATTAAATGACACCTGTAAATTTAATTAGACACAAT

TCTTTAGAATTGCAACAATTTGGTGGTGATTGTGTAGATGATAGTCTTTCTATGGATACG  
CAAGATATTATTGATCAACCTGCCTTTAGTATTACAGAAGTTGCGGTAATGAATGATGAA  
GAAGCTCGCTTCAAGATACAAGAACAATTTGGTTCGAGCTTACAATGAAGACGAATTTA  
TTATCTTCAATGTTGCAGTTCGATATCCTGAAACTATTGCTTATTTGGTGGACTACTACGT  
ATACAGCTCAAGATGTTTTCCAGGAGAACCACCAAGTCATATCGGTTTCAGCTATATTTT  
ACCTAGTACATTACAATCTAGCGTTGGGCTTCTAACAGTACCAATTACAAGCACAAAGC  
ATAGACCAATTGGACAACCTTACATTAGAATATGTTGTGATAAAATCAATTCCAGATTATC  
CATGGGATATGAGTATTTTCATATGCTAAACATTGGGAACAACGGTGGTCTGGCCTAGAT  
GTAGGACATAGGGGATTAGGTACATCTTTTCAAACAAAAAACTGTGCTAATGTGCGTGA  
AAATACAATAGCTTCTTTAAAGACTGCATCATATCATGGAGCTGATATGGTTGAATTTGA  
TGTTCAATTATCTAAAGATCACATACCGGTTATTTACCACGATTTTATGTGTCTATTTCA  
TTAAAACGCAAAAAACAAATAGAAGCTATGGATATGCTAGAAATACCTGTTAAAGACCT  
TACATTAGAACAACCTACATCTATTGAAG

>novel\_circ\_000536

AGAACAAAGAGGACGGGGAATACAAGCAGCAAGAGGAGCCACGTGAGACTAACTTC  
ATCGAGGTGGCAACTGAACATACATCAGACATGAGGGGATCTAAAAGAGATTGGATTT  
TTAGAGTCCAAGTACATAAAGTAGAAAAAAATGAAGTTTTGTATGTAGTGGGTAATTTG  
CCTGAACTGGGTGCTTGAATCACAATCAGGCAATTCAGTTGTACAGGAACATGGCA  
GTCGGGATTCTCCTATACTTTTTGACAGTAATAGTAGTGGAGAATTTTATAGTGACGATG  
GACATGACAATGCTGGAGATAATTCATTTGGTGATATAGATGATGAAGGTGGAAGAATA  
TTTTCACAAAAGTTGCACTTCCCATTGATGCTGATGTAGAATTCCGATATTTTGTGCT  
GTCATCTGTCAATTCTAATGGTACTAAAAATTCGGCCAAGACTCTTATTATTCGTAGATGG  
GAGACTCATATGACACCACGCTTTATTAAGAAAAATGCACCTAGCAATTTTAGTAGTGA  
CACATTGCCTGATCCAGACAAATTTGGTTATTATAATGGCTACTGTAAAATTGAACGAG  
GGTGGTTGACCGATGAAACTGTGATACAATTTAAGCTTTTTAATAATCCAATTAAGTTAT  
GGAAAAATCGATTACAAAATAGAAAAGTTCACATTAAAATGACACCTGTAAATTTAATT  
AGACACAATTCTTTAGAATTGCAACAATTTGGTGGTGATTGTGTAGATGATAGTCTTTCT  
ATGGATACGCAAGATATTATTGATCAACCTGCCTTTAGTATTACAGAAGTTGCGGTAATG  
AATGATGAAGAAGCTCGCTTCAAGATACAAGAACAATTTGGTTCGAGCTTACAATGAAG  
ACGAATTTATTATCTTCAATGTTGCAGTTCGATATCCTGAAACTATTGCTTATTTGGTGGA  
CTACTACGTATACAGCTCAAGATGTTTTCCAGGAGAACCACCAAGTCATATCGGTTTCA  
GCTATATTTTACCTAGTACATTACAATCTAGCGTTGGGCTTCTAACAGTACCAATTACAA  
GCACAAAGCATAGACCAATTGGACAACCTTACATTAGAATATGTTGTGATAAAATCAATT  
CCAGATTATCCATGGGATATGAGTATTTTCATATGCTAAACATTGGGAACAACGGTGGTCT  
GGCCTAGATGTAGGACATAGGGGATTAGGTACATCTTTTCAAACAAAAAACTGTGCTAA  
TGTGCGTGAAAATACAATAGCTTCTTTAAAGACTGCATCATATCATGGAGCTGATATGGT  
TGAATTTGATGTTCAATTATCTAAAGATCACATACCGGTTATTTACCACGATTTTATGTG  
TCTATTTTATTAAAACGCAAAAAACAAATAGAAGCTATGGATATGCTAGAAATACCTGTT  
AAAGACCTTACATTAGAACAACCTACATCTATTGAAG

>novel\_circ\_000537

ATATGACTCTTTGTCTTTATAATATAATTGCTCACAAAACAATCCAATAAGCATGGATGAT  
GAGTTTTTATTTTATCAAACAGCAGTGAGGCGAATATACTGTAATGGGGTGGGTTTTGTC

CACCATAATATGGATTACTATATGGAGTTGCCTCTTGCGGGGCTTCGAATTAGCTCCACA  
GATATCTCCAAAACAAATTCCTTGTGATAAAACAAGAAAAGTTTTTACTGATTCTTGGG  
GAATTATTAGTGATGGACCATTTGGGCTCAAATTATACTCAAGATTCTCATTGTGAATGGC  
TTATAAAAGCAAATAATAGTCGACAATTTATTACTTTAAGTTTTTCGTACAATGGGAACAG  
AATGTAGCTATGATTATGTTTTTGTATTATGATGGAGATTCTTTTCGATCTCCTCTTTTAGG  
CAGTTTTAGTGGTAAAACTGAACCACAACAAGTAACATCATCATCTGGTTATATGTTAAT  
ACTATTGTATAGTGATACAAACTATGTTTTGGATGGTTTTTCATGCGGAATTTTCAGTTAC  
AAATTGTTCAAACAATTGTACAAATCATGGCAAATGTATTGATAATACATGCTTTTTGTGA  
GGATGATTGGGGTGGACGAGATTGTTCTAGAGCTCTTTGTCCAAATAATTGTAGTTATA  
GTGGAAAATGTGATTTAAACGATGTCACGTGTCACAATGGATATTCAGGACAATCTTGT  
TCATTACATAAAATGCATCCTGAAAGCAACAAATGGCACTGGCTTTCTCATTGAGAAGG  
TGGATTAAGGCCACGGGCAGCACATACTGCAGTTTATATAAAAGAACTGATTCTCTTT  
ATGTTTTTGGAGGCTATGATCTCAATTATATACTTGATAATTTGGAAGTGTATCGATTAA  
TATAAGTCAATGGGAAGACGAATATGGTAATGAATTAGAAGGCATCTCATCTGCAGAAC  
ATTTAGATCCTATACTCCTTGCCCTTGAATTAAGGAACAAATACAGATGAAAAAGAA  
TTATATGGTCTTCGTAATTCGTCTTTTCATATGGAAATTGCTTTCTGGTATTAAAGATAATA  
ACAATACCTTTAATTCACGTAATCTTGCTAATGTAGAAAAAAGATATGGCTGGTCAGAA  
TTTAGGATTGGAGATCGTGAAAAAAAATTCATGAACTAAAGATAATGAACTAGTA  
GAAGTACAGTTAGAATAGAAAGAAATGATGATCTTAAAGAAAACATTCTAGACATCCT  
AGACCTCGATATGCACAACTGCAAGACACCGTAGAAATCTTGAAAACCTAGATTTTTA  
TAAAAAATTTCACTTCAAATATAAAAGTGATATATTAAATTGGGAAGAGGAAATTGC  
AGAAGATTCTATTGGAGATAATTTACGTTCAAGAACCTAAAATAAGAGACGAATTATT  
TAAAGATGAATCTATTAAATCATCAATTGATAAACTACCTAAACCAAGTCCGCGATATGG  
CCATGCTGCTTGTAGATATGATGGTGGTTTTGTTATATATGGTGGAAAAGTACAAGATGG  
TTCTTTATCTAATGAATTATGGTATTATAATGTTAATACACGTTCTTGACATTAAGAGCA  
AAAAATTCCTATTTATCCTCCACAATTAACAAGACATACACTTACTTTAGCAAATAAT  
TATATTTATCTTTTTGGTGGTAGTACAGTTGATGGTGAATTTTCATCAAATTTATATAAGA  
TTAAATTAAATTTATCTGACCCTACAGCAACTACAGAAAAATGGAAAGAAGTACATCCT  
CGAGGAGGTAAAGAGTTAGATGTACGTGTAGTTGCACATTCAACTGTATATCATCAAGC  
TACTAATTCCTTTATTAATTTATGGAGGAGTAGTAGCCAGTGTAGCACGATTTAGTAAATTA  
TCAGATAGGATGTTTGTATTTCAACTTGACAAAAAAGTTTGGTCGGAAATTCATTATCC  
AAGAGCACATTTAAGAGATACTTATGTTCCAAGAGAACGAGCATTTCATACCTGTAATA  
TTATAGGAAATTACTTAGTTGTATTTGGCGGATATTCTCATAGACATAATAAAGAAGAAA  
TATGTTATGATAATCAGATGTATCTTTATCATTTAGGCTGTCACGCTTGGGTAAGCCATGA  
TGTATTAGGTTTAAATGATAAAGACTCTCGTTATCCAAAACAACAGGGAGTATTTGCAC  
ATGCAGCAGATGTACGGAATGGAAATACATTGTTATTAGTTGGTGGTTATCATGGAAATG  
TAAATGCTGATTTACTTGCATATACATTACCACCAATGCTTGCTCCAGGAGATGAAGATA  
ATATAGAACCTGAGCAAATTTGTTCAAGACATAAAAGTTTGATGGAATGTACAGCTAAT  
CCAGAATGTGGTTGGTGTTCGGCAGATGAGATATGTTACGGTAGGACTATTGGTAGTAA  
TTGTACAACAAATCTTCAAACGACGCGTTGTTTAGGTGTTTGCCTGCGCTTGGAGATT  
GTCATTCTTGTTTAATACATGGTCAACCTGGTGGAGGGTGGGGTACAACCTGCACGTGG  
AAAAAGTCTGTGTCTAATAAGTTAAATCGTGGAACCTTGACTTGGTGTGTTCAAATG  
CACGTTGTCATCATAAAGATGATAATTATGGTGTTTGTGGACTTCGAGATGATACATTAT  
CTCAAATACCGGGATGGTGGGGATCGAAAGGTACAGAAATTATAAAAGTTGAAGAATG

TCGGGAAATGGATAAAAGACCAGGATTAACATTTTTTAAAATATAAACCTCCAGTAAATT  
TACTCAACCTGATTCAGTTACGATAGTTAATGCTACTACAGTAGATTTTAGTGTTCCAT  
CTATGCAAGGAGCAAAAACAGAATCAGCACTTGGTGGAGAAATGATTGCTAGATTAAT  
TGTTTTCTTAGACCACCTCAAGATTTTTGGGATAGTACACTAGAACATTTGAAAATTT  
GTGTTAGCTACAATAGTGCAACATTACATGTATCAAGAAGTGATGATCCTCAAGAATTG  
GAATTAGTTGCAAATTTAACTGCCGATACATCGCAATGTATTCCAACAAAATGGCCAGA  
TGGATATCAAATGATGTTATTACCAGGTCGATATTTATTAGATTTTGAATCAAAAAGAAT  
GGTACTGCAAGTTATGCATATGCTAGTAAAATGGAAATTATTCATAACAAAAAACCG  
AGAATCCAAAAGTATTTACATTTGAATATCTCGAACCATTTCAAACGGTTCTTGTCAG  
CAATATAAAAACCTGCCTTCATTGCTTAACTGATTCTTCATGCG

>novel\_circ\_000538

ATGAAAATAGAAACATCACAGGACATGACATAAATATTAATATAAAAACATACGGGAAC  
AAACGGCATCATGAAGAATCTCGCGCCGTAGTCGCCACTTGCAATGTTAGTCACACAG  
ACACCCTCCTCGACGGACAATCTGCCGAATATGCTGCCGGTACTCGAGGAGGAGGCCG  
ATGTCGATGTTGACGATGCTTTCCCGCCACACGTTGACGCGACGAACATCATACAAA  
CCGGAGTCGCCCACCAGCAAGAAGCAGGCACTGAAAACCTTCAACGAGGTCAACGC  
GCTCCTCCAGGCCGGCAGGAAAAGGGAGGCTAAGTTGATCATAAGGGAAAATGCATG  
GCCATTGAACAACGGGATCAGGACGCAGTTGTGGCCAGCCCTTTGCCAGCAACACGC  
ACATGGGAAGAATATGCTTGATGGATTCTATTGGGACATGGTCAATCAAGTGTTTGAA  
CTACAGAACTGCCGAAAAATCAATCATGTTACCACCATTCTGTGGACAGTACTCATTGC  
CTGTCTGACACCTGACGAGAAAAGGCAGGTGCGTTGCGGACAGGGTTGTATCTGTGC  
TGGGATACGCTTGTCCTGATATTACCTACAGTCCTTCTCTTTATCCCATCACAGCTCTTCT  
TCTTCACTTTATGCCAGAGGAGGAGTGTTATCATTGCATGGCCAGTTTGGTTGCCGCTA  
AGGATAAGATGTTTCATCACACAAACGAAGCTCCTTTACGAAGTTACCTGGAAAACGTG  
GGAACAAATTACGAAAAAGCACGTGAAATCGGCAGCGGTACATTTAGCGAGGCATTGT  
TCTGGATCAAGAGCAGAAAGAATTTATATGGATTGGATGTGGTGGATTCTTCAACTTCT  
TCCTTTCCAACATCTAGTCAGAGTTATGGATTGTTTTCTTCATGAAGGCATTAAGGTATT  
CTATCGAGTAGCAATGGCAATAGTTTTATTATTCTATAAACATTCATCGTTGCAAAATTCT  
GAATGGATGAACGAAATTTGGAAGAATGGAATTGATGCTGCACTTTCAAAATTTTGCA  
GGCAAATACCGGTAACGTCAGCTAAATTTTTACGTACCGCATTTGGAATACGTGGACTT  
AGTTCAGCATACATATCAAGAGTATTTTTGCGCACAGAAATGGCTCTAAAAAGTAAAAG  
TGTTTTAACGGGATCCAGATCATTGGCAAGATCACGATCCACAGACAATCTGCCGACG  
AGCCAATCTCAAGTCAACATTCAGATGATGTCACACACGCTCACGATACGAGAA

>novel\_circ\_000539

CGAACTCAAACCTCGGAGGAGGGATCCATCGAAACATCGGTCGTCGAGCAGTGTCGCC  
CCCTCGAATCCTCGAAGGGGATTTTCGGAGGTTGAGAAATTCGCGCGAGATAATACGAA  
ACGAAGTCGGGCGGCGGTTCGAGCGGAACAAGTGGTTGGTTAAACTGTGATGACCGGG  
CACCGGTTCGGGCAAAGTACTGGAGTGCAAAGCCTCGATCCCATCGTGCACCGTCCGGA  
TACCGGTGCACAGGCCAACGATCGAGAGAAGAGGAAAGAAACGAGCCCCGACGACG  
ATCAACGGACAAATATTATTCTTATTATCGTTGTTATTACCATCGTCGAGCGTCGGGCCG  
AAGCGTTGAGGAGACGGGGTTATCACGACGAGGCAGGAGGCTGGCAGGACGGTGGA  
ACGATGCCACCACCGGCGTGATTTCGACGAGCGAACGCGCAGTTTTTCGTAGGAAA

CGGGAGCACGGCCGATCACGAAAGCGGCGACACGAGGGCCGACGACGAAAGGAAGA  
CGAGGCGAGGAGGGACGCGGCAAGGTTGGAACGCGGCGGCGGAGTCGGCCGGCTCG  
AAGCGGAGGGAAAGCGAGCAGACGGAGGAAAGGACAGGAAGAGGCGAGCAGCCGG  
AGAGTGAGCGGTCTATGACGTTACCGGTGGCCGTCTACGTCACGTTAACG

>novel\_circ\_000540

GTAAGCTCCCATCATATATATTTTCGTTCAACCAGCTTATCCAATTAATCGAAATAACTAA  
GTAAGTATTTATCACCTCATTCTCTCTCTCTCTCTCTTTCTCTCTCTCAAACTTAAGA  
TTACAAAATGCAAAATTTTTGAAATTCACCTCCATCCGCTCCTTTCTCCCTCCCCTTCTTT  
CATCCTCTTTCTTAATACGCGAGGTCAAGTACAGAGCGTGGATGTTGCACGGAAGGCA  
AGAGAAAAAGAGAGCGCATCATAGAAAGAAGGAAGAAAGGAAGGAAGGAAGGACA  
GGACAGGAGAAGATAGAACGTGGATAGAATCGGAATCGAGTGTGTGTGAACGAAGGG  
TGAACGACCGAAAG

>novel\_circ\_000541

GTAAGCTCCCATCATATATATTTTCGTTCAACCAGCTTATCCAATTAATCGAAATAACTAA  
GTAAGTATTTATCACCTCATTCTCTCTCTCTCTCTCTTTCTCTCTCTCAAACTTAAGA  
TTACAAAATGCAAAATTTTTGAAATTCACCTCCATCCGCTCCTTTCTCCCTCCCCTTCTTT  
CATCCTCTTTCTTAATACGCGAGGTCAAGTACAGAGCGTGGATGTTGCACGGAAGGCA  
AGAGAAAAAGAGAGCGCATCATAGAAAGAAGGAAGAAAGGAAGGAAGGAAGGACA  
GGACAGGAGAAGATAGAACGTGGATAGAATCGGAATCGAGTGTGTGTGAACGAAGGG  
TGAACGACCGAAAGGTAGGGGCACTAGGCTGCTACCCTCCGCGACGAGAGAGAGAGA  
GAGAGAGAAAGACGTTGGAGGGTTGCGGAGAAGGTGGCGGTCAGAGAGAGAGAGA  
GAAGGAAGGTTTCGAACGGATCGGCTCTGACCTCCTCTCTCGCTCCTATCCCCTCCCTC  
CTTCGCTCGCCTCTCCTTCATCGTGGCCAGCGAAGAGGATCAATACGGACCACGTG

>novel\_circ\_000543

ACTCCCCGGTATCCCTTGGATCAGCAGGCTCGCCGCTCGGGATCCAGCCGGCGGACGC  
ACCTTCACCCATAAACTTTTCCTGCTCCAGGGGAGAGCATGGCCGACACCTCGACCCTG  
TCGCCGGAGGCCAACATGCCGGGCTCGCCGGGCTGCCCCGTGGTCAAAGTGAAGAGC  
GAGTACCTGCTCGGGATACCGCCGAGCGATCCTCTCCGCGGGACGGCGAGCGTCGGCC  
TGGAGCATTCCCGCGCGGACGCGGACCGCGCCTCGCCCGACTCCGTCTTCCCCGACGC  
GGCCTCCATTGTGGGTACGCCAGGGTTCGTCGAGGACCAACAACAACAGCAACAGCA  
ACAGCAACAACAACACCATCAACCTCATCAGCAACAGCAACGCTCAGCCACGCCGAC  
CGTAGCCACCAGGCTGTGCGCGTACTCGCCCATGCAAGCCGTGTCCACGACCCCGATG  
CATGGACAGCAGGAGCAGCCGAGCTCGAGGAGCGACAGCCCCGAGAAAGCGGACCT  
GTCCTCCGCCCAGACCAAGGAGGAGTCCGACAACCTCGGTGTTGACGGCGGAGGCGG  
CCGCTCCGAGGCCTCCAGTCAACCTAGTCACCGCAGCAGCCCGTCTCCCAATACAGC  
CCCAGCCAGAGCGCGAGCCCCGTTCAACAGCAGCAGCAAACGGGGGGCCTGAGAGG  
TAGTAGGGTGCCCCCGCACCTGTTGGCCACCACAGTTCTGGTCGTGCGAGAACAAC  
GGGTTTCGCCACGCAGAGGCTGTTGAACGGGGTGATCAGCAGCGCGGTGAGCTACGCC  
GGCCAGACGGTGGCGGTGCGGTCCACCAGCAGCGGCGGGGCGGCGAGCAGCGGGGG  
GAGCGGGAACGGGGCGAGCTCGGCGGGGCAAGCGAGCACCGGACCCACCACGGCCG  
CCCCATCCTCCT

>novel\_circ\_000544

ACTCCCCGGTATCCCTTGGATCAGCAGGCTCGCCGCTCGGGATCCAGCCGGCGGACGC  
ACCTTCACCCATAAACTTTCTGCTCCAGGGGAGAGCATGGCCGACACCTCGACCCTG  
TCGCCGGAGGCCAACATGCCGGGCTCGCCGGGCTGCCCCGTGGTCAAAGTGAAGAGC  
GAGTACCTGCTCGGGATACCGCCGAGCGATCCTCTCCGCGGGACGGCGAGCGTCGGCC  
TGGAGCATTCCCGCGCGGACGCGGACCGCGCCTCGCCCCGACTCCGTCTTCCCCGACGC  
GGCCTCCATTGTTCGGCTACGCCAGGGTTCGTCGAGGACCAACAACAACAGCAACAGCA  
ACAGCAACAACAACACCATCAACCTCATCAGCAACAGCAACGCTCAGCCACGCCGAC  
CGTAGCCACCAGGCTGTTCGCGTACTCGCCCATGCAAGCCGTGTCCACGACCCCGATG  
CATGGACAGCAGGAGCAGCCGAGCTCGAGGAGCGACAGCCCCGAGAAAGCGGACCT  
GTCCTCCGCCCAGACCAAGGAGGAGTCCGACAACCTCGGTGTTTCGACGGCGGAGGCGG  
CCGCTCCGAGGCCTCCAGTCAACCTAGTCACCGCAGCAGCCCGTCTCCCAATACAGC  
CCCAGCCAGAGCGCGAGCCCCGTTCAACAGCAGCAGCAAACGGGGGGCCTGAGAGG  
TAGTAGGGTGCCCCCGCACCTGTTGGCCCACCACAGTTCTGGTCGTTCGAGAACAAC  
GGGTTTCGCCACGCAGAGGCTGTTGAACGGGGTGATCAGCAGCGCGGTGAGCTACGCC  
GGCCAGACGGTGGCGGTTCGCTCCACCAGCAGCGCGGGGCGGCGAGCAGCGGGGG  
GAGCGGGAACGGGGCGAGCTCGGCGGGGCAAGCGAGCACCGGACCCACCACGGCCG  
CCCCATCTCCTGCGAGACGATGAAGCCGCCGGCGCAGAGGGCAGCGCCGGCACCCC  
CGAGGCCGCCACCCACGGTGATAATGGGCGAGATCGGCGGGGTGCGGACGATGATCTG  
GTCAGCGCCACCCCTGGACCCGGTGCCGCCCCCGGCGGCCTCGTGACGACGGCGAC  
GGCGGCGGTGCCGCGGCCGCAGCGGCCGCTGCGGCCGCGGCGGCCTCCTGCTCCTC  
GTCGGAGGAGTCGGCCGCCAGCTGTTGCTGAACCTCGGGCAGGAGTCGAGGGGGGG  
GAAGCAGGCGTCGTCGTCGGCGGCGGCGGGGCCGTAATCGTCGGCGGCGGGGCCCCC  
GCTCAACATGGAGAGGCTGTGGGCCGGGGACATGACGCAGCTGCCGGCCGCGCAGCA  
GATGCAGGCGTTGAACCTGACCGCGTCGGGGTCCGGGCAGGCGTGAGAGGAACG  
GGGGGGTGGTCAAGTCCGAGGGGGCGGCCGCGTCGCAGCCGATTTCGGTTCGCGCCGC  
CCGCGCCCCCGATGCCCCCGCAGGAGCACGAGGAGGACGAGACGCCTATGATATGCAT  
GATATGCGAGGACAAGGCAACCGGGCTGCACTACGGGATCATCACGTGCGAGGG

>novel\_circ\_000545

GGGAGAGCATGGCCGACACCTCGACCCTGTTCGCCGAGGCCAACATGCCGGGCTCGC  
CGGGCTGCCCCGTGGTCAAAGTGAAGAGCGAGTACCTGCTCGGGATACCGCCGAGCG  
ATCCTCTCCGCGGGACGGCGAGCGTCGGCCTGGAGCATTCCCGCGCGGACGCGGACC  
GCGCCTCGCCCCGACTCCGTCTTCCCCGACGCGGCCTCCATTGTTCGGCTACGCCAGGGT  
CGTCGAGGACCAACAACAACAGCAACAGCAACAGCAACAACAACACCATCAACCTCA  
TCAGCAACAGCAACGCTCAGCCACGCCGACCGTAGCCACCAGGCTGTTCGCGTACTC  
GCCCATGCAAGCCGTGTCCACGACCCCGATGCATGGACAGCAGGAGCAGCCGAGCTC  
GAGGAGCGACAGCCCCGAGAAAGCGGACCTGTCCTCCGCCCAGACCAAGGAGGAGT  
CCGACAACCTCGGTGTTTCGACGGCGGAGGCGGCCGCTCCGAGGCCTCCAGTCAACCTA  
GTCACCGCAGCAGCCCGTCTTCCCAATACAGCCCCAGCCAGAGCGCGAGCCCCGTTCA  
ACAGCAGCAGCAAACGGGGGGCCTGAGAGGTAGTAGGGTGCCCCCGCACCTGTTGGC  
CCACCACAGTTCTGGTCGTTCGAGAACAACGGGTTCGCCACGCAGAGGCTGTTGAA  
CGGGGTGATCAGCAGCGCGGTGAGCTACGCCGGCCAGACGGTGCGGGTCGCGTCCAC



CAGCAGCGGCGGGGCGGCGAGCAGCGGGGGAGCGGGAACGGGGCGAGCTCGGCG  
GGGCAAGCGAGCACCGGACCCACCACGGCCGCCCCATCCTCCTGCGAGACGATGAAG  
CCGCCGGCGCAGAGGGCAGCGCCGGCACCCCCGAGGCCGCCACCCACGGTGATAATG  
GGCGAGATCGGCGGGGTGCGGACGATGATCTGGTCAGCGCCACCCCTGGACCCGGTG  
CCGCCCCCGGCGGCCTCGTGGACGACGGCGACGGCGGGCGGCTGCCGCGGCCGCAGCG  
GCCGCTGCGGCCGCGGGCGGCCTCCTGCTCCTCGTCGGAGGAGTCGGCCGCCAGCTG  
TTGCTGAACCTCGGGCAGGAGTCGAGGGGGGGGAAGCAGGCGTCGTCGTCGGCGGC  
GGCGGGGCGCTACTCGTCGGCGGGCGGGGCCCCGCTCAACATGGAGAGGCTGTGGGC  
CGGGGACATGACGCAGCTGCCGGCCGCGCAGCAGATGCAGGCGTTGAACCTGACCGC  
GTCGGGGTCCGGGCAGGCGTGGGAGAGGAACGGGGGGGTGGTCAAGTCCGAGGGGG  
CGGCCGCGTCGCAGCCGATTTCTGGTCGCGCCGCCCGCGCCCCGATGCCCCCGCAGGA  
GCACGAGGAGGACGAGACGCCTATGATATGCATGATATGCGAGGACAAGGCAACCGGG  
CTGCACTACGGGATCATCACGTGCGAGGG

>novel\_circ\_000546

GTGGTACACTTGAGGCAGAGGCTAGACAACACGGTAAGCAGTTCGAGGGATCGATCTT  
TCCCTTTTCGACGCGACTGTCGCCATGATCCAGTCCCTCATAGACTGCGACGAGTTCCAA  
GATATTGCCACGTTGAGGAACTTGAGCAGAGCTGCTGGACCATAAATCAAACCTTAAGCG  
ACAAGCTGTGTCAGATAGGGGACAGTATAGTGTACAAGTTGGTGCAGTGGACCAAAA  
GGTTACCGTTTTACCTTGAGCTACCGGTCGAAGTTCACACGACATTGCTCACCCACAA  
GTGGCACGAGATCCTCGTGCTGACCACCTCCGCCTATCAGGCGATACACGGCCAGCAC  
AAGTTCTCCAACGTCGGCAGCGACGCGATGGGAGCGGATTTTATGCAAGAA

>novel\_circ\_000547

GTTTCGAACAACATGTATACGTTGCAAACGTGCCTAACGAACATGATGGGCCGGCCGAT  
AACCATGGACCAATTGCAGCAAGACGTAGGCCTGATGGTGGAAAAGATTACGTATGTC  
ACGTTAATGTTTCAGGAGGGTTAGATTACGGATGGAGGAGTACGTCTGTCTGAAAGTAAT  
CACCATGCTCTCGCAAGCACGTGGAGGTACGATGGAATTAGAACATCTACAAGAACGG  
TACATGAGCTGTCTGCGAAGTTTTGTCGAGCACAGCGCCCCACAACAGCCGAATCGGT  
TTCACGATCTTCTCGTCAGGTTGCCCGAA

>novel\_circ\_000548

TGCACAACAATCTTCAGAAAATGCTGTAAATCTGGTCGTCATACATTAGGCAATCAAG  
TAATACGTAAAGGATACATGTGTATCCATAATCTTGGTATAATGAAAGGTGGCTCAAGAG  
ATTATTGGTTCGTTTTAACGTCAGAGAGTATTTTCATGGTATAAAGATGAAGAAGAACGT  
GAGAAGAAGTATATGCTACCTTTAGATGGATTGAAATTACGCGATTTGGAACAAGGATT  
TATGTCTCGGCGGCATTTGTTTGCTTTATTCAATCCAGAAGGCAGAAATGTTTATAAAGA  
TTACAAACAGCTAGAATTGAGTTGTGAGACTCAAGATGACGTTGATTCATGGAAAGCT  
TCTTTTCTCAGAGCTGGTGTATATCCTGAAAAATCAACAGAGCAAGCAAATGGTGAAG  
GAGAGGATAAACCAAAACAACGGTACGAGAAAAATGGTACAGTTAGTACGAAAAATG  
AGGGATATGAGGGTGGATCAGAAGCTCAATCATCCATGGATCCTCAACTTGAACGTCA  
AGTGGAGACTATTAGAAATTTGGTAGATTTCATATATGAAAATTGTTACAAAAACAACCTC  
GTGATTTGGTTCCAAAGACAATTATGCTTTTGATTATTAACAATGCAAAAAGATTTTCATCA  
ATGCAGAGCTATTGGCACATCTATATGCAAGTGGTGACCAGGCTTCCATGATGGAAGAA

TCGCCCCGAAGAAGCACAAAAACGAGAAGAAATGTTACGCATGTATCATGCGTGTAAG  
AAGCACTTCGTATTATCGGAGATGTTTCTATGGCGACAGTGTCCACTCCGGTCCCACCA  
CCTGTGAAAAATGATTGGTTAGCATCCGGCGAAAAATCCAAGTCTTGGGTATCACCACC  
ATCTCCTGGTGGACCAAGACGTGGAGTGACACAGCCACCCCCTCTTTCTAGTTCTCGA  
GCTCCACCTCCAGTTCCTACGGGTGGCCGACCAGCGCCGGCTATTCCTAACCGACCTG  
GACCTGGTGGACCTCCGCCAGCCCGTGCTACACCTGGCCTACCTCCTCCTTATACCA  
TC

>novel\_circ\_000549

GGTGGATCAGAAGCTCAATCATCCATGGATCCTCAACTTGAACGTCAAGTGGAGACTA  
TTAGAAATTTGGTAGATTCATATATGAAAATTGTTACAAAAACAACTCGTGATTGTTTC  
CAAAGACAATTATGCTTTTGATTATTAACAATGCAAAAGATTTTCATCAATGCAGAGCTAT  
TGGCACATCTATATGCAAGTGGTGACCAGGCTTCCATGATGGAAGAATCGCCCGAAGA  
AGCACAAAAACGAGAAGAAATGTTACGCATGTATCATGCGTGTAAGAAGCACTTCGT  
ATTATCGGAGATGTTTCTATGGCGACAGTGTCCACTCCGGTCCCACCACCTGTGAAAAA  
TGATTGGTTAGCATCCGGCGAAAAATCCAAGTCTTGGGTATCACCACCATCTCCTGGTG  
GACCAAGACGTGGAGTGACACAGCCACCCCCTCTTTCTAGTTCTCGAGCTCCACCTCC  
AGTTCCTACGGGTGGCCGACCAGCGCCGGCTATTCCTAACCGACCTGGACCTGGTGGA  
CCTCCGCCAGCCCGTGCTACACCTGGCCTACCTCCTCCTTATACCATC

>novel\_circ\_000550

TTTTAACTCATCAAAACAACATGTCTGTGACTACAACTGTGCAGCCAGCTACTGAGAG  
TCTTTCTCGCCATGGAAGCAACATTTCTTTGTCTGCCACAGTTCGTGCGGAAGCGTTG  
ACGATGGCCTCCAAGGATCTCATCCTCAGTATCAGGATACAATCCTTACTATTGAGGAA  
CTTCGTGCTCAATTGAATTCTTGTTTCACATGTGGAGTTTCGTGGAGCGAAGAACACGT  
TTCTCTCGATTGCAGTGAATGTGGTGGTTATTCTCTTCAACGACCGTGCCCACCTTGTG  
ACGGACGTTGCCGCACCTCGTGGAACGCGACCTTACTATG

>novel\_circ\_000551

AGAACGGAGACTCGGTAACCGGAAGGGTTGGAGGGCAGAGTATGAGGGTCGGCGAG  
GAAACGCGGGAAGAAGATTCACAGCTCGGCGAAGCGGTTAATGACTGGCGGTCACCG  
AACACAGCTGGACAGGTCTCCACCGGTTGGAGATGAGCACGAAGGAGGCGATGGCGA  
CCACCGTTTCTTCGACGGGGGCGACGCTCGCTTCGTGCGCGAAGCTCGACGTCGAGGC  
AGAGGACGACGAGGAGGAGCCATCGACCACGTTCGACGCGTTGGATATGGATCTGGT  
GAACGGACCGAATCCGTGGCTTCCTGCCTATGGCTTCCAGCTGCAGCATCGTTCCCAT  
TTCAACCCACGCACGAGGATCTACGGACTAATGGTTCGTTACTCTGTTGTCTCTTGAT  
GCGCATGCGCATGCGCGCACGTGTACGCGTGTTAGTTATCTATCGTTTCACTTTCATCA  
GTCGGTTAAACGATGCGCACAGACGAACTGCGACCACTGCGTCGCGTTTAAATTTAAA  
AAAAAACTCCGTGGTTCTCTAACCTTAGGAGTCTTACCCGCGAGTTAATTTTCTATTGC  
TTTTTTTCTCTCTCTCTCTCTCTCGTGATTGAGGCGCACATACAATGATTGAAATAC  
GTACGATATGATTGAATACTTTCTACTCGTTAAACGCGATTTACACGCAGTAATAAGACG  
ATGATTTTTCTTTTCTTTTTTCTTTTTTCTCTCTCTCTCTCGCGTCTTAATATCAAAG  
GTGATCGGTAAGATGGAAAAATAAGAATGGAAACGAGACGAGACGAATATTTCGAAA  
GAATTAAATTAGGATGGAATGGGAAAACGATGTTGCTGAATTGTATCACGCTTTCATTC

G TTCCTACAATCTCACGCGAAGGAAGTGACCGGTTTGCTAATTACGCGTAGATCTCTCG  
GTTTCTGTTTTACATTAATCCGTTGGAGAACGAGTCGTGAGTCACGAAAATATTTTTCTT  
TCTCATATATATATACATTGAAAAAAAAAGATAACCTCGGTAAAGCGTAAATTTATTCA  
GATATATCGAGAGTTGTTGACGAAAATAAAAAGGAAGAAAATAAAATAAAATAAAACT  
TTCCAAGGCAATTCGTTCTAATATATACTCGGCCAGATCTGTCCGTGATCTGTCACGAAC  
TGTTACATCGAACAGGAAGCCTCGTTATGTACGATGAATTCCTTGCTGCTACCCCTCTCTC  
CTCTACGCTCTATATATTAATAGATACTTGTGTATCGTTGCCTTAATTTCTATCGGAAAAA  
GAGAAAAGTATCGCGCGGGTTTGAATACAAATCGTCTGTTAATGGTAAAAACGCTTGAT  
ACGGACTACTTTCTACAATCATAGATCGTAGAACCGAAAGAAGGAAAGAGAAAAAAG  
AATTCTGAGCGCAACCGAGATGACGATCTCGATTGCGGGAAGGAAGAAGCCTTCTTCC  
ACTCTAGAGAATCCATTAAAATCCACGCGTTACAACAAAAAAAAAAAAACAATTACCCGGG  
CGAAACACACGCCAGTTTCTTTTATCGGGTGATCACGGGTTACGCAAAAATGTGCAAC  
ACTGACGATGCGGATTCATTTCATTTCGTTTCGTTGGTCGTTTCCTCGTGACCGATTCGAGC  
GCGATTCTGAATGACGCGTACCGCGCTGCAAACCAGGCAGATCACCGATTATTTTTGTG  
TAAGGCGACTGATTATTCACGTCCGTTGCCCGGTTGCGGAACGAACGGGCTCGCCGCA  
ACAGGTGGTTCTCTTTCCTCCGTCATATTGTAGAACGAGTGTACAACTCGTATATATACA  
GGATGCCGATATATTCGTGGAACAAAATTTGGAACAAAAGTTGATATATATATATATTTTCG  
GTAAATTTATGCAAAGGATTTTGGTGAGATATATACAGGGTGTCGATATATTCGTGAAA  
CAAGTTTGGAACAAAAGTTGATATATACATATCTCGGTAAATTTATTTTATACAAAGGA  
TTTTGGTGAGATATATACAGGGTGTCGATATATATATATATATATGGAACAAGATATAGAA  
CAAAAATTGATATATATATTGGTTACATTTATTTTATGCAAAGGATTGTAATTAAGGATTTT  
GGTGAGATATATACAGGGTGTCGATATATTCATGGAACAAGATTTGGAACAAAATTGA  
TATATATATTTTCGATTAAATTTATTTTCATGCAAAGATTTTGGTTAGATATATATGGGTGTC  
GATATATTCATGGAACAAGGTTTGGAACAAAATTGATATATATATTTTCAGTTAAATTTAT  
TTTACGTAAAGGATTGTAATTAAGGATTTTGAGATATATATATATATATATATATATAGG  
GTGTCGATATATTCATGGAACAAAAGTTTGGAACAAAAGTTGATATATATATATTTTCAGTT  
AAATTTATTTTATGTAAAGAATTATAATTAAGGATTTTAATGAGATATATACAGGGTGTC  
GATATGTATATGAAACAAAAGTTTAGAATAAAAATTGATATATATATATCTCGGTAAATTTA  
TTTTATGTAAAGGATTGTAATTAAGAAATTTTATGAGATATATACAGGGTGTTGATATAT  
TCATAGAACAAGGTTTGGAACCAAAGTTTGGAACAAAAGTTGATATATATATTTTCGGTT  
AAATTTATTTTATGCAAAGGATCGTAATTAAGGATTTTGGTGAGATATATATAGGGTGT  
CGATATATTCATGGAACAAAAGTTTGGAACAAAAGTTGATATATATATTTTCGGTTAAATTTA  
TTTTATGTAAAGAATTATAATTAAGAAATTTTATGAGATATATACAGGGTGTTGATATAT  
TTATGGAAGTTTGGAACCAAAGTTTGGAACAAAAGTTGATATATATATCTCGGTAAAT  
TTTATTTTATGCAAAGGATTGTAATTAATAATTTTGGTGAGATATATACAGGGTGTCGAT  
ATATTAATGGAACAAAAGTTTAGAACAAAAGTTGATATATATATATTTTCGGTTAAATTTATT  
TTATGCAAAGGATTGTAATTAATAATTTTGGTGAGATATATACAGGGTGTCGATATATTC  
GTGGAACAAAAGTTTGGAGAAAATGGAGAAAGGAAGGAAAAAGCAAAAGTCGGTACA  
TAGAAATCTCGGTAAATTTATTTTATATAGAGAATTGTAATTAAGAGTTGTGATGGGG  
ATAAATCACGATATATTAATTTTGTGCGGAAAAAAAAAAAAAAAAATATGGATTCACATTCGG  
AATGGAATTGACAGTTAACTTGTGCTCGATGAAGTTAAGGTTAATTGAAAAAGTGTCTT  
ATTAATTAATAATAATAATTTGAATATCTATAGCTATTATAATAACTATTTATCGAAGT  
AGTAATTTTCAGTATCGATGGTTAAATTTTATTCATCTCCGACGAGGTGAAATGTATTTAT  
AACATAATAAAATAAACCACGATATTTTGCATTACCAACTTTTCGAAGAATCGATTTTC

AAAAAACGTTAACGCTTTTCACTTCTTGCAACTTTTGGTCGTTAAAATTTTGTAATTCGT  
TCCTTTCTTTAATTGCGAATATACCTTCTGAAATGGAATAATTATATCATATACGATATAAT  
TATTTTCGATATATAAAAAAAAAAAAAAAAAAGAAAGAAAAAAAAATCAGCGGAAAGAAA  
ATGCAAAAATTTATCATCACGCCGCCGTTTAATTGTAATATACACTTGCCCATTTGTCGA  
ACAAATCTTTGCGCCGTCGTATTATTTTATGATTCAGCAAACGAGTGGAGAAGGACAG  
GTTTATATGCGCGTGACGATAAAATAGCGGTGAATCCATAAGAATTCGAATCGAAGCG  
TCGAATGCAAAATCTCCAATGACATAACGTATATGCGTCATCACACTCGAGCTATTTAAC  
GATTATCGATCGTTTCTTTGGAAAAGAAAAAAAAAAAAAAAAAGAAAGAAAGGAAAAATC  
GAACGAGCGATTATAAAATATGAATAAATTCGTAATTATATTATGTGGATTATTTTCTCT  
CCTTTTATTTATGATTAATTTTCGTTTATATCGATATATGTATTTTTTATCTCTCTTCCATATA  
TCGTCCGTGAGATATCTTCGTTCTGTTTTACATTCCGCTAAAAATATGAAACATTCAATGT  
TCGATAAGTTTATCATTTGACCTGACTTTTCGAGTCAAGTTACAGAATTTCAAACATTTTCG  
GATTACATGTGTTAGTTGGAAAAAAGAGTTTTGCACTCTGTATTATTTTTTTCACCGTG  
GATCGAAACGTTTAATTCAATTATGTAAACATGGAGATTGAGAAATAATCGTGTTTCATT  
ATGGGTTATTATATCCCATTACGAAGGTATTATATTAATGCCAAGTTTCTTGCTGTGAAAT  
GAAATGTTTCTTATTAGAAATTTTCACGGAAATTCCTTCTTCGTCATAAAGTTGTTGTTT  
ATACGAGAAACGTTTCATTTATCCTCGATTAATTTTCTCCTGTATAAAGCGTTTGATACGA  
TTAAGATGTTTCTGTATAAAATTTTAACTATAACATTGTATTTTACTTTTCTCGTTTCGAG  
AATCGAGCAATTTTAATTTACCGCCAGAAACGCCTGTACGCAGGCAACCAGTGAAGCG  
TCGGTGTCCGATCGGTAAGGCAAGGAACGTACAGTAATCTGTCAATTGTATAGTGTGTGC  
TTAATTCCTTGCGCAAAAATTTTCTAAATTAATTTAGAAACGAGTGGAAGATAATTGT  
ACTTTATATATTTTAAACGTGTAAATATTTATATTTTCTACTTATTACATTTATCTTAAAT  
ATCATCAATGAGTAATGTAAACGTATAAGTTACAGTAGTTATTTTTATGTGTGAATAACTTT  
TCGATAAGAACACTATGCGTTAGCATAGATCTCACTGCTCGGTGTTTATCATACTGTAGC  
ACTCGTTTCGTAGCCAGCTAGCTAGCTTATTTGTAAACACTTTTAACCGAAATATCGCGTT  
TGAAGTATCGTGAGTGAAAATTCCAGAAAACGAAACTGAAAATAGGCGAGTGAAAATT  
AAATACAGGGGAGAAATATTTAAAGCAAGATTAGATAAGGAGATTAACGATAAGTAGTA  
ATGGTTTTATAAATTTAATAATTTCACTGTTTTGTTATTATTGTTTGCAGATTCATATCGTG  
GGAGAAATATATACACACAATAGTTTTTTAATTAATAATTAATGGAAAATAAAATATGTGT  
ACAAAATTCATGGAATTCCACGAAACGTACCAATAACACACGAACGTTTGAAACGTTA  
ATGGCATTGCTCGTTCCTTACTCGTGTGTATCATATTACATAAGAAAACATGGCGCTGTT  
ATTCTCGATGTGAAGCGATAACCTTGTTCCCTACGAAAAGGACAACCTTCGTTGGGAGTTT  
GTGTACACAATTCGTTCTGCTCGAAACTATTTCGAGATAAAAATTTTCGTGGCTCGATCG  
AAATATAATATATAAATAAATTTTTTTTTTTATATATAAATATTATAAATATTCGTTAAAAAT  
CATCGCTCTTCGTTTACAGATACGGTGCTGGTGCAACAAGTGGATTTTCTGGAGACCAT  
TTTAGAAGAAACGTCCGACGACCTGCAAAGCGATTCCGATCGAAGTGGAACCACTTAC  
TGGGTGCGCTCGGACTCCGAAACTGAAAGCGTGATACACATACGAGCGAATAGATTAG  
CCGGTAAGGAATATACACGTGATATAAAGTTACGAAGGCATTTTCTTGGAATTTAAAT  
CTTTCGATTGAAGAAAAAAATTCCTCGATCGCTATCGATTATAATTAAGAAAAATTAT  
CCAACAATAAGTCTAAAAATAAAACGAGAGAATTTTTGGACCAGGATGTCGAATATCA  
ATTTGGCTAGATCGAACATGGTGGCCGTGTGCCATTTGTTTCATTATATCTTCTAATTTAA  
ACGATCTCGCGCTTGAAACGAATTTTGTAAACAACAGGTGTAACATTCTTTTTTAAATTT  
TTAAATATATATAAATTTATATATATATATATATAGATATGTTAAATTTTTAAATATTGCGT  
TTGTCCTAAATTCTAGTTTTTTGTTAGTTTTGGTTAGATAATAATTATTATGATACAACCTC

CACTCTCTATATATAAGATTGCCTCGAAAACGGTTCCAACAACGATATTGAAGAACAAG  
TGAACGGTATTTTCGTTTCGGAATACACGTTGCGAAACCTCATTCTCGCGTCTCGTCGGT  
ATTCGCGATGGTGAACATTGTTACCCGAGGTCCACTTTCTCTTTTCAACTCCCGATCC  
CCCGATTCAATTGACTCCCGAAGAATGAAATCGTATCTGTATATCTTCATTCAAACCAACA  
TTCCGTAACACCAGTTTTCTCTTGTATAACAAAAACGAAAACATTTATTACAAACTC  
ATTTATGAAACTCGAGCGTATCTATAAATAGATTCGTGCGAATCGATTCTTCGATTTTGAAT  
TATGATGGGATAAAAAAATTTTCGAAATCTTGTTGATTAGGAAAATATTATTTTTTATTT  
TCGATAATTATATTAATAAAAAAAAAATAATATTAGTGAGATGTAAATATTTTATTCGGTTG  
TTTCGAATAATACGTTTAATAAGGACAGTTTCGTTTACTCTTTGTTCTTCGAATTTATCGC  
AACGAGATTCGTATCCACGATGGTTGTGCGACCGTTGTAACGTGTCGGTATGTCCGGTT  
GCTATGCTTCAGGCGTCACGGGCGCTGCATCACGCGCGCTCTCTTTTTGCGGGAGCGG  
CCGTTTGTGCGAACGATTTTTCATCGGCGTGGAACAACCGTTGATCCATTCTCGTTCCC  
TCGATAAATAGATCGGTAACGTGGACGCACGTGGAAAACTCGCGTTTGAATTTGATCA  
ACTCGGTTTAACCTCGGAAGTGGACTCGAACCACCTTGTTACTCTAATTGAACGGTAATTG  
CATCCCAGACAATTAATCTCTTTTGTTTACGTCTTACCGCTATCCTTCTCGCACCGAGA  
AGAGTACCGTTAAGCGTTTATTAAAAAGCTGTTGGCTCGCTGAAAGGTGGTTCGTTCTG  
AACCTGTTAATCACTCTTGCTAATTACGTGTTGTAGTTTCGTAACAAGTGAACGTGGAT  
TTATTACATTTTGAACCTTAACGGATTTAAAGAGAAATAATATATATGTATATTATACATGT  
TGTATATATTGTATATATTCATTTTCCATCGTTAGATTTTCCAAAAGAATTAATAAAATT  
ATTAATTTAATTATAAATTTATATCAGTATATTAATTATATTTTATAATTATATTTTATATTAAT  
TATAAATTATATAAAATTATAAATTTAATAAAATTTTCGCGCGCAAGTAAAATTTACTCGAA  
TTAAGTATTTTTTTTTTTTTTTTCAATTTTTTTTTCAGTTTTTGTAAAAACGTAAAAAGAAA  
GATAACGTATCTCGCGTAACTCAATACCGACATCTGACGGAAATACCAGGAACCTTGCAT  
TATAGAACAGTATAACAGAAGCGATAAACATTTATCTTGGCCGTTACCAACTATTCTCT  
TTCCTTTTTTTTCAAGAAAAGCGATTATTCTGAAGCGATTATTCTGCTAATTATTAAT  
CGATTTCGCGTATGAATTAACCGTGTAAGTAGCATTTTTCGAAGCAATATCTAGAATATAT  
TATTCGATTATCGCACGAATAGAGAGTTCGGTTCCCTTTTCTTTTTTTTTTTTTTTTT  
TTGTTTTAATTCAGTGTTAAGGTCAATCGTGTCTACGATTCTACGCACGATCCTCTTCCG  
TCGCATCTAATATTAGATCACCTTCAACGTGATTCATATAGGATTACCATGGACTTAGTCG  
TTGAATTCCACGTGCATGCGATCATGCGAAAATAAACCGAGACGAGAACAATGCATCG  
CGGAGCAAATTCAATTGTCGACCTGAAAAGAATTTTCGAGTCGAGAGACGAGATTCGAT  
CGGTAAGGAGGGGGGAACGAAAACGTTTCGCGCGTTTATTTTCATTCGTGTTCCCCAA  
AAAATCTCCTTCACCCCACCTTACGGAATCGGTTTCCATCGATCGGTACGTGCAAGAA  
TCGTAACCAACGGTTGTATTAATAGCGAATTTTGCAAACGAGTCTCGCGCGATTGTGCA  
TAACGATACCCCGTCGATACTAAAAAGTACGCTCGACTCGATGAAAATTTTTTCTGGA  
AAAAAGAAAAGACGAGAAAAAAATATCGAAAATTGAAACCAAACGTGGAACGTAAG  
CGCGAATTAACACGAATGAGAATCGATCTCCTTCCCGTGTAATCGATGTGCAATTCCCT  
TTACGTTTCTTTTACCGCTTTACTTACCCGACGGAAGTGGGGCGAGGAGTGGGGGCGG  
CCTGATTGGCGGTGGCCGTGTGCGGGCCAGGAAGCCGTGGTTCGTTCAACCGGAAGC  
GACGCTTACACCGGTTGTGCGGCTTCGTGACCGTCGACGCGACACGTGACCGGCGACA  
CGAGGCCCCGATAACGGGTGTTAATCGGCAGACGACACGTTTCGCGCCGGCCGACGC  
CTATCGTCGCCCACCCTTCGCGACCCCTTCGCGCGCCACAGTGGCTCTCAACCACCGC  
TCGGCTCGATGCGATAACTCGAGAGGCGACTCTCCCCCGCGCAACCACTCGGCGGCAA  
TTCGAATCTCGGCGGCAATATTATTATCTTTAACGTTTCGATTTTTTTTACGCACGTAATA

TAAAGTGTACGAAAATAATGTATCGTCGAACGATTAGATTTTTTTTTTTTATCTCAAATTA  
GACCGCGATCGGATTACATGTTTCGGCGTTGTTGGTTCGAGTTTATGGAAATAGATATAT  
TATTTTCGAAGTTTTTTTTGTAATACGATAATGAAATTAGTTCGAGATCTTTTATTTTTTGT  
TTTTTATTATTATTTTTTTTTTATTATTGTTTTTATTATTGAATAACGAAATTACTTATTCGTTA  
AAGGATTAGATAAGAGGGAAGGTGAGAAATAAGAATAATGGAATATAGGAGAGCACGT  
TTATTGGAATTGTAAGGTTTTTCTCAACGATCTCAAATTTCTTTCTTTTTTTGTGAAA  
AGATATGTAAAGTATTAAGATATAAATAAATCACGTGAAATTTTATTTTAAGTAATTCATC  
AGGGAAATGGTGTTCGAGTTGTTGAGTTCGGAAGAAGGTGCGAAATTAACAGTCTAAGAT  
TGTGATATGATGAAAAGTAGTATTGAAGTATTAGAAATATCGAGAGAAAGAACAAGAG  
GAGCGCAAACCTTTTCGAATCATTTTTACTTACCCCTTGCCTCTCGCCAATCTTCGCCTTC  
ACTTTAACAAGGTTGGCTCGAAAGTAGGTTGGGTTTGGCAGGTTTCGTCGCGCTTTTA  
CTCTCACGGCACGCAAACCTTCTCTCCCCCTTCGTTTCGAGGCAATTTGTATTTAATAAAA  
ACAAAGTAGTAGAAGAAGTAAATAAATTGTGAACTAAAAATCTAATTAATTAAATTATT  
AAAAAAATTATTA AAAAACAATGAAAAAGTAAATAAATTATAAAATAAAAAATTAATAA  
ATTAAAGGCAGTTATTA AAAAAAATTATAAACTAATTAAAGGCAGTTACTAAAAAAAT  
TAATAAATTAAGAAATTAATAAATTATAATAATTATTACAATAATTGTAAATTAAATTAATA  
ATTAATAATTA AATTTAA AATTGTAAATTAAAGACAGTTATTAAAAAAATTTGTAAATTA  
ATAAATTA AAAATAGTTAGTAAAAAAATTATAAACTAATAAATTAAAGGCAATTATTAA  
AAAAAATTGTAAATTAATAAATTAAAGGCAGTTATTAAAAAAATTTTAAAAATTAATA  
AATTAATAATAATTATTA AAAAAAATTATAAACTAATAAATTAAAAACAGTTATTAAAAA  
AAAAAATTATAAACTAAAAAACAAGAACTAATAAATTAAAGGCAGTTACTAAAAAAA  
AATTATAAACTAAAAAACA AAAAACTAAAAAATTAAAGGCAATTACTAAAAAAATTAT  
AAATTAATAAATTAAAGATAGTTACTAAAAA AAAAAATTATAAACTAAGAAACAAGAAA  
TAATAATAATAATAATAAATAAATAAATAAATAAATTAAAAACAGTTACTAAAAAAA  
TTATAAACTAATAAATTAAAGGCAATTGCCAAAAA AATTATAAATTAAAAACA AAAAA  
GTAATTATTTAAAGGCAATTACTAAAAA AATTAAATTAAGAAACAAGAAATAATAATA  
GTAATAATAAATAAATAAATAAATAAATTAAAAGCAGTTACTAAAAA AATTATAAACTGA  
TAAATTAAAGGCAATTACCAAAAAAAGATTATAAACTAAAAAACA AAAAACTAATAA  
ATTAAATTATTACAATTATTAATAAAAAA AATTATAAACTAAGAAACAAGAAATAATAAT  
AATTAATAATAATAATAATAAATAAATAAATAAATTAAAAGCAGTTACTAAAAAAA  
ATTATAAACTAATAAATTAAAGGCAGTTACTAAAAA AATTATAAACTAAAAAGACTAA  
GGA ACTAATAGATTAAATTACATTCACGTTTTCTGTGGAAAGATGAAAGGCTGGACGG  
GAGCGGGAGCGAGTGCAATTCGGGGGCGGCGAGGAAGAAGAGGCGAAGGGGCGGCA  
AGTACAATGGCGGGAACGAGCGGGAGCATCAGCGGGATCATCAGGCGGTGTTTCGACG  
ATTATCCGGCTTCGCCGAGATCGTCGAGATCGTCCGCCTCGTCGAGATCCAGCTCCCTT  
CTTCAGTTCGAGTCTCTGGAGAGGACCTGCGCCACCCTCTCCCCGTCGAGCTACAGCT  
TCGACTCGTTGGAGTATCCGAACCGGTGCGAACGCCTCCCATCCCGGGAACACGTCTCC  
GGATAGCCTCGAACAGGACTACGACAAGGCTCTGCCAATGGTTTTTGAAACGTGGA  
CCACTTTTCCAGAATCAGGCCTTACCGTAGCTTCGAGAGTCTGGACACGTGTCAGAAG  
GAGGAGGAGGAGTTTCGGCCACGGTTGCCTCGCCAATGGATTACGCCTTTGTACCTGA  
AACGAAACGCGGAGCTGTCCAGCAGGACGCGTAGCAACGGCTACCACCGGCCCTCGA  
G

>novel\_circ\_000552

CGCGAACGGGAGGGCGCCAGTGTCCAGCAAGCCGCCCCCTGCCGCCTCAACCGCCCCG  
CTTCGGGGCGCTGGGCTCGAGAGCGTCGACGGGCGCGTCGGCGGCGACGGCGGGCGGC  
GTGTTTCGTCGCGCCGACGCGCGGGCCACGGACCTTGGAATCCGGCGGCCATCGAGATG  
GCGAAAGCCCGCACGATGCAGGCCGCCAGGAGCGCCCGGTTCGGCCTGCTCGAGACC  
GACCTCGACGAGGCCGTCGTGCCGTCGACCACGACCCCGAACGCCGCCTCCACCGGC  
AAAAAGACCAGGAGCCTGCTCAATCTGAATCACACCTCGACCGCCCCGCGGGCCCAGG  
CCCGAGCACGCCCTCCACGTACCCAGTCGCCTGTCGCCGCTTCGCACAGGAGCCCCC  
GCGACAAAGACGCCGCCTCCACCATCAACCAACGGCCACACAAATCCATGGAGTTCCT  
CCTTGACAAGGAGAACCTGCATTTCGTCAAG

>novel\_circ\_000553

GGAGCGTGAAGCTGTGTTGGATGGAGAGCTCGTTCGTTGGCACGAGACCCGTGGATTC  
ACCAGAGACGCCGATGAGTTTGCCACGGAGACCGACTGCTGCCCGGGATGCAACGC  
GACCGCTACCGAGACGTGCAGCTGCGTCGATTCCGCGACATCCGGCCTCTTCTTGATT  
TGACACCGACGCACGACGATGCCCAACACCACCAACAACAACAGCAAATAGGTG  
GCGGCGGTAGCCTATGCCCATCACCGTCCTCGTCACTCAATTATCACCACCACCATCAT  
CATCATCATCACCGTCAGCTTCACCATCAACAACAATCTCAGCAGCAACAGCGCCATC  
ACCGCG

>novel\_circ\_000554

GCGGCGGTGGAGGCGGCGGCAGCGGCGGCAGCGGTGCGCTGCGACAGCACAAAAA  
CAGCGCAGAAAATCGCGAAGCGGAAGCAGCTCGCCGAGCGGCAGTAGCCGTTACAGG  
AGCAGCAGCAGCAGCCGCAGCGGTAGTTCCGCCGCCAGCACTTCGGGGGCAAGCACG  
TCGCCCCGGCAGCTCGCCCCACCGAGGCGGAAATGCGGCCGTCACCGAGGACCGCAGG  
CCGCTCGCCATTTGCGTGCGTAATTTGCCGGCACGCAGCAGCGACACATCCCTCAAGG  
ACGGCCTGTTCCACGAGTACAAAAAGCACGGGAAAGTGACGTGGGTGAAGGTGGTGG  
GAGCAGCGGGGGATCGTTACGCGTTGGTCTGCTTCAAGAAGCCCCGAGGACGTGGAGA  
AGGCGCTCGAGGTTTCCACGACAAGTTGTTCTTCGGATGCAAGATCGAGGTTGCCCC  
ATACCAGGGTTACGATGTCGAGGACAACGAGTTCAGGCCTTACGAGGCCGAGGTCGAC  
GAGTATCATCCAAAGGCGACCAGGACCCTGTTTCATCGGCAACCTTGAGAAGGACGTCA  
CCGCGTCCGAGCTTAGGAAACATTTGAGCCTTTTGCGGAGATAATAGAAATAGATATT  
AAGAAACAAGGCGCGGTATCGAGCTATGCCTTCTGCCAATACTCCGACATAGGCAGTG  
TCGTCAAAGCTATGCGATCGATGGACGGCGAACACCTGGGTGCGAATCGAATAAACT  
CGGATTTGGAAAGTCGATGCCACGTCTGTGTATGGGTTGACGGTATCGGAG

>novel\_circ\_000555

ATATGGACGCGTGCAGAGCGTCAAGTTGCTGCCGCGGGGCGAGGAATGCCCCGTGGAT  
GGAGGTTCCGGTGGTTCCCTCGGAGAAGGTAACGAGGGTGGTTCCGGTTCCAATTCTG  
GCAACGGTGGTGGTGGCGGGGGCAGCGGTTGTTCTCAGGCAGCACAGGGGGTGCCT  
CCGCGACGGTGGCGTTCATGGATATCAAGTCCGCAGCGAAGGCCACGCGACTGAACA  
TACCTTGACGAACGAGCCCTTACCACACAATACTACGAACCACAGCATCTTCAGCAC  
AGGTTTCCCTCGCACGG

>novel\_circ\_000558

ATACGTGGGCGGTTCGAGGCGAGAGTTGTCAGGGGTGAAGGAACTGGTGACCTCGAG  
GAGGGTGCAGAAGAGGCCCTCGGCGAACGTCGTAAGGTCGGATGGAGGTTGCATCGG  
GAGCAGTCCAGGGAACGGCGGTGTGATCGCGGCCGGCTTGCTGGGCGGGTGCAGCGG  
CGGCAACGACGCCTTAGCCGAGTTAACCATCGAGGACCTGGCATCTATTCCCGCCGA  
AATCACACCTCCGCCAATCACACAGGCCATTCTCTCATCACAAG

>novel\_circ\_000559

GTGGTTTGAAGCACGGAAACGGCGGCATAGGCAGCGCGAGCAGTTCCAGAAGCACGA  
GTCCGAGTCAACAACAACAATCGCCCCAAACCGGACTCTCCTTCATTCCCCAACCGAG  
AAATCAAAATTCGACCAACAGACAACCCTCCACCACCACCCGAGCCCCCGAGCCTC  
GACGGTGGGCAAGCCCGGGGGTGTGAGGGGCGGCCAATCCTACGCGCCCCCGCAGCA  
GAACAAGAACTCGGTGCTGGACAAGTTCAAGCTCTTCAACAACAAGGAGAAGAACC  
AGGACCGGGGCAAGGCCTCGTCCGGCGTCTCGAAGCGCACCTCGAGCTCGTCCGGCT  
TCTCCTCGGCCAGGTCCGAGCACTCGGACAGCTCGACGTCCCTCTGCGACCAGAGCA  
AGCTTCAGGTTCGAGTCGCCAAGAGCCGCGCGCTCAAGTCCAAGTTGCAGTCGGCGA  
GCAAGGGGGGCAACAGGCGAGCCCGAAGACCGGGAGGAAGGAGCAGGGCGGCAA  
GGGGCAGAGCAAGATAGCGCGGACGAAGGGGGGGGCGGCCGATAAGTTGCTCGTGTA  
CGCGGCCCGCCCTCGAGGATGTCAAGCCGAGCGGCAAGATCGCCGCTCGGGGAC  
CAAGATGCCCCCTCCGTCGAGAGCAAGAAATCCTCGAATCTGCACGATTTGCTGAAA  
CAACAACAGCAACAACAACAACAACAGCAGCAGCAGCAGCAACAACAACAACAGCA  
GTCGAGCGGTGTCGGCCAAGCTTTGCAAAAGGCGAATCCGTCCGTGTTGTTGCCTAAA  
CAGGTTCGAGGAGGGCAGCAGCAGCAAGAGGCCGGTGGGAAGAATCAGTCGGGCGC  
GAGGAACGAAAATCTGGCAACGTCGAGGCAGCAACCGATCGCCAGGCCTAGGATGGA  
GCTGCCTGCCAAGTTGGACGCGGCGAAGATCATCCATCCTCAAAACGCGAAGGTGAAT  
CCGCCGCCGAACGGGTGAACAAAGACATCCTCGCCCCAAAAGGTTTACTGTTGAGC  
AACGGGATGATGAAGCAGCAGGAACAGGAGGAGGAGGGGGGGCTCACCGAGGAGAA  
TAATTCGACGATCGAGCGCACTTTGAACCAGGCTAACCTGTGCGAGCAGGAGAGGAA  
ACGGAAGGAGATCGGCGCGGATCGCGACGATCAAACGTTGGACGGGAAGCAAGTGGC  
GTGTTTGAAGGGGGGGCGGGTGGAGGTGCACGAGCTCGAGGGGAGCGGAAGGCAAA  
CGCCGTCTCTCTCTCCCTCGCAACCCGACGGACGCGAACGACGCGAAGATGACGA  
GCGTTCAAGAAGCGACCACGATTGGCCCGATCGCTGCCCTCTTGCCACGTCGAGCA  
ACAGCAGCAACATCACGCGGTGAATTTGGCAAACCGCACTCGATGGCGGGGAGCGG  
GCCGTTGCAAGGCTCGAGCTTGATCGGTTCCGGGAGTCCGGGTTCAGCATTCCGAAG  
CCCACGGCCTTGGTGAAAGGCACCTCGAAACCGCCGAAGGAAAACAGCGTGCCGGG  
CGTACCGACGCCCACGAAATTAAGCAGACGCTTTGCACCGCAAGCTCGACCCGAAT  
ACGGTCGCGATGGTCTCCCCGATGCCGAGCATATCCGATCTAATGTCGGAGAGTTCGCA  
CAGCAATTGCAACAGCACGGGCCAGAGCAATTCAAGCGACAGCAGCGTTATTTACAG  
GCCGAGCAGCGAGAGCGGGAGCGAGATAAAACTATACCGAACAGAAAAATCGATAC  
CACGTTTCGAGCAAATGGAGAAGGTTTTGTCCGAGAGTTCAACGTGCGGAGGAGGAGG  
AGGAGGGGGGCGACGACGAAGCGGAGATGACGGTGAAGCCCATGCAACCTCTGCTCCG  
CGGTTACACGCCTGGCGCGAGGGCCCTTCAGACCCTGCCAGCAGAACGAACGCGCG  
ACAGTACACGATCCTTCATTCTCTCGTCCCATCATCATGTCCGTCACGATTACGCGGACAT  
CGACGTCGCCTCCGGTTATCTGAGCGACGGGGAGGTTCTTCGCGGTGGCATGACCGTC  
GGTAGCAGGACTCTGTCCGACTTGTGCGACGGTTACATGTCCGAGGGCGGTGCTTCGT



TGTACGCGCGTAGAATCAATCCGTCTTACGGTCATGATCACGAGAG

>novel\_circ\_000561

TACTTACAAGTTTATTAGTAGTGACCGACGAAGCGCCCCAAGATATCAGACACAAGAAT  
CACGATGAACGGCCCAGAGAAGCTTATTTCAATGGATCGGCATTCTGAAATTGAGCTC  
GTTCGTATCTGTGCACAGGCACAGCGGCTTGAGCTTTCGAACTTGCGAGGGGCGGCCGG  
CTCTTCACCCAAAAGTACGACGAGGACTCGATCAGTCTGGAAGTGACCCCGGACGGA  
CTTTTGTTCGCGGCGATTGTCGAGCAGCAGAGATACAAAGCGAGATTGAACGCCAGGC  
TGTTGAACAACGCCTGGCACAATGTCAATCTATTCTTTAGACTCGGAAATCTCACCTTG  
AACGCAGCGGGCCACACTCAGGTGATCGCCAACGCGACTTACAACGCTGCCATTCTCA  
CGTTGCCCGATTACGATATGAACGGGTCTCTCGTCGTTGGAGAAGGGTTCAAAGGATGT  
ATCCTGCAGGGTCCGGGGATTCTTTTAAACGACACGATGAATAACGGGGCAGTTTTTG  
CCCCTGCCCGCGGAAAATAAAGGAT

>novel\_circ\_000563

GTCCGCCATGCTTGAGTGGGCCATGCCGGAACGGTGGTACGTGCAACGAGGATATAAA  
AGGGGATTTAGCTGCGCCTGCAAGCCGGGCTTACCGGTGTTCACTGCGAGTCGCAG  
CTCGGCGTAAGGCTGTGCGAGCAAAGTCCGTGCAGGAACGACGGTGTTTGTTTAGCG  
GTGACCGAGACCGAATATAAATGCGATTGCCAGCCGGGATGGAGTGGA AAAAATTGCG  
AAACGAATATCAACGAGTGCTCCCCGAATCCTTGACAGGCACGGCGGTGTTTGTATCGAT  
GGTATTAATAATTATACGTGCATATGCGACAGGACTGGATACGAAGGTGCGAATTGCGA  
GGTGGACATAGACGAATGCTTGGCTAATCCTTGCTTGAACAACGGCGTGTGCTACGAC  
AATTACGGCGGTTACATATGCCACTGCCC GAATGGTTTCGAGGGGCAGAACTGCGAGT  
TGAAC TTGAACGAGTGCTTGTGCAATCCTTGCAAACATGGCGGCGATTGCGTGGACGA  
CGTCGGCTCGTATCACTGCAATTGCCC GTCCGGATACGCCGGCCGGCACTGCGAGCTTA  
GAAGTTTGTGCGAGAACGCGGCTTGCCCCTCGAACAGCATCTGCGTGGAGGACGCGC  
ACGGGCCGCAATGCGTGTGTAATCCCGGATACATGGGCAATCCCCCGAATTGCACCATC  
AATTATTGCGCCAATAATCCGTGCAGCAACGGGGGCACTTGACAGGCAACAAAGACG  
GATTCAATTGCACTTGCCCAACCGGAATGGAAAG

>novel\_circ\_000564

GTCCGCCATGCTTGAGTGGGCCATGCCGGAACGGTGGTACGTGCAACGAGGATATAAA  
AGGGGATTTAGCTGCGCCTGCAAGCCGGGCTTACCGGTGTTCACTGCGAGTCGCAG  
CTCGGCGTAAGGCTGTGCGAGCAAAGTCCGTGCAGGAACGACGGTGTTTGTTTAGCG  
GTGACCGAGACCGAATATAAATGCGATTGCCAGCCGGGATGGAGTGGA AAAAATTGCG  
AAACGAATATCAACGAGTGCTCCCCGAATCCTTGACAGGCACGGCGGTGTTTGTATCGAT  
GGTATTAATAATTATACGTGCATATGCGACAGGACTGGATACGAAGGTGCGAATTGCGA  
GGTGGACATAGACGAATGCTTGGCTAATCCTTGCTTGAACAACGGCGTGTGCTACGAC  
AATTACGGCGGTTACATATGCCACTGCCC GAATGGTTTCGAGGGGCAGAACTGCGAGT  
TGAAC TTGAACGAGTGCTTGTGCAATCCTTGCAAACATGGCGGCGATTGCGTGGACGA  
CGTCGGCTCGTATCACTGCAATTGCCC GTCCGGATACGCCGGCCGGCACTGCGAGCTTA  
GAAGTTTGTGCGAGAACGCGGCTTGCCCCTCGAACAGCATCTGCGTGGAGGACGCGC  
ACGGGCCGCAATGCGTGTGTAATCCCGGATACATGGGCAATCCCCCGAATTGCACCATC  
AATTATTGCGCCAATAATCCGTGCAGCAACGGGGGCACTTGACAGGCAACAAAGACG

GATTCAATTGCACTTGCCCAACCGGAATGGAAAGGAACGACATGCCTGTCATCCGCCTC  
GGATTGGTGTTCGGCTTGTTACAATGGAGGCAGTTGTCTCGAGACGCGTTTCGGTATTA  
TGTGTCAGTGCCCAAGATTTTGGACGGGACCGCAATGCAAGGAACCGATCACCTGTCTG  
CGATCTACCTTGCAAACAAGCTTCCGCTTGTCACGATTAT

>novel\_circ\_000565

ATTTACAATTAGCGGCAGAACTTGGAACGCTTTTGGAACGGAACAAGGAATTAGA  
AAATATTATCAAAGCGCACCAATCGACCGTCGAGGAACAAGCACAAAGAGATAGAGTAT  
ATGAAAAAACAAACCGCTGCCCTTAGAGAAGTGAACGACTCGCGATTGAAAATTTACG  
AGCAACTGGAAGTCAGTATTCAAGATTTGGAACGCGCGAATCATCGTCTAGTAATCGA  
GAACACCAGCGACAAAAAATTGATCAAGAGGTATGAGGATCGATCATCTCGTCAATGT  
TTGACGATCGAGAGCCTAGAGGCGAGGTGCGAGGAACTTCAGAAGAAAATCGACGAG  
ATAACGAGCAACATGAAAGTCTGCTCCGGCAACAATCTACGAGTCAATCGGCTAACA  
ATATCACACAAACACACACCATTTCATTGGAAAGTATCGGTACGCGAGGGTAGCAGCAC  
ACAACAGAACGCTGCTCCGTCTGGTCAGAAATCTTTCCAAGAGGCAAATGCGGACTC  
GAGCGTGCGACAATTACCGACGATTCCGACGAACGACGAAGAAGTTACCGAATTGTTG  
AGACAGTTGCAAGAGGCGCGAAGTCAGAGGGCGAGGGAGCAGCAAAAAGTTACCGA  
GCTTCGGCAACAATTGGCAACATTGTTGCAGGAAAATAACGCGTTGGAAGAACAGTTG  
AACGTTTGGCGTAATAAAGCACAAAGACGTGAAAAATCTTCAAGAGGAAATAAATACTC  
TGGAAGAAGTAAGGCGGGGTCAATTATGCGGGCGATGTTTACGCGGATTGGACTCTAA  
GACGCACGACGAACTCTCTGTAATGTTGAATCAGGAGGAATACGATGATATTAGCATGG  
CTGAATCGCTAATGAACGATAGTCAACGTGACACTGAGTCTCTCACTCAG

>novel\_circ\_000566

CCCCTCCTCCCCTAGAATTCGATCGTTTTAACGGACTCCTCGTGACGTACAGATACAGT  
TTCTAGGGGGAAATTGTGCGACGCAACGCAACGTGGGAAAAAAAATCTCGTCGTCTTG  
AACTTTTGTTCCTTGATTTTTTTTTTTTACGGCAAATATTTACGAGAAGAGGTATCAT  
ATATCTTTGGTTCATCCATGATTTCGGATGAATTGGTCGACGCGTTACACTGTGACGGA  
GAGATGCAAGTATGTTTCGTCCGCAAATTCTTGGGAGAAGTGGCCCCGCAATAACGTG  
AGTGTGGTGTGGAATGAAAGAAAAAGAATGCAGCACGGTAGAGGAGGCTAGATGAGC  
ACCAATTTTCAGAGAGGTGCATCGCACGCGAAACGTCCAGCGATTGTAGGGAAAAAA  
CAAGACGGCGGCGCGTCTCTGAAAGGAAAGAAAAGCGATAAACACGTGTGCGAAAG  
AATACGCGGTCCATACCTGGCCCGCCATTTTGGCGGCATGGTCCTTTGGGCCACTATACT  
ATTCCTACAAGGAGCTGGTTTCGTAGGCTCGGTAACAGGTATTCCTGGCGTTCGGGAA  
AATATAACGGTGATGTTTCCTGAATCCAACGTCCGTGCGCGTATCTTGAGCACGAGTCA  
GGTCGAACAAGTCGAGAAATACGACGTACGTACAAGCCAACGGATGCCAGGAAATA  
CAATGACAGTTACAGGGTGGTGGCGGTGGTCGCGGGGAATAGCGAGGCGGTACGTT  
GAGCGGTCTGAGGGCTGACACGCAATACCAGCTAGTCGTACCGCCGTCAGAGGTGG  
GAAAAAATTTGAAGCCGGCCGATCGTCTTCCGCACGCTTGAGCCGCCGCGAACGTCC  
CCGCAACAGGATGCAGCGGTAACCGGCGGCCCTCTTCCACCCCCTCCACCTTCTTCTC  
AACAGCCGCAAGCTTACATACAGGTCCGCGGCGTTGAAGTGGGCATTGTCGTGTTAGT  
GTTGATCTTTTGGGCGGGCGCGATAGCGTTGTTCTTCAATCGGTGGGGCAAGATTCGTA  
TGTTGTTGCCGTATCAGCCCGATTACAAGGAACAATTGAAAGTTCTTGGGACAGGGGT  
ATGCGCAGCGGCGAACGCCGCTACACGCAACATCCCACTCAGCACACTTGCTCTCAG

CATCTGCACTGGTCGAGCCATCACGTGGACTCGTTGGACAGCGGAGGCGGTTTCGGAT  
GGGCGAGAACTTCGAGGCCGCGGGTGAACAGCGCCATCGACGTGGCCGGCTTCCTAT  
CCCAG

>novel\_circ\_000567

ATTCGGATGAATTGGTCGACGCGTTACACTGTTCGACGGAGAGATGCAAGTATGTTTCGT  
CCGCAAATCCTTGGGAGAAGTGGCCCCGCAATAACGTGAGTGTGGTGTGGAATGAAA  
GAAAAAGAATGCAGCACGGTAGAGGAGGCTAGATGAGCACCAATTTTCAGAGAGGTG  
CATCGCACGCGAAACGTCCAGCGATTGTAGGGAAAAACAAGACGGCGGCGCGTCTC  
TGAAAGGAAAGAAAAGCGATAAACACGTGTGCGAAAGAATACGCGGTCCATACCTGG  
CCCGCCATTTTGGCGGCATGGTCCTTTGGGCCACTATACTATTTCCTACAAGGAGCTGGT  
TTCGTAGGCTCGGTAACAGGTATTTCCTGGCGTTCGCGAAAATATAACGGTGATGTTCTC  
GAATCCAACGTCCGTGCGCGTATCTTGGAGCACGAGTCAGGTCGAACAAGTCGAGAA  
ATACGACGTCACGTACAAGCCAACGGATGCCAG

>novel\_circ\_000568

ATGCCGACGCAACGAGGAAATTAACGTAGGTTGAAATGTTGGTGTGACATCGCTATG  
AACGAGAGCCGGTGCTACGTCGATTTCGGCCGTGCTCGCTGAACATCAACCGTTCAACC  
GGAATGGGAAGGCACTCAGGTGGGATCGAAGAAGAGCGTGCTGTTCTACACGACCGA  
TTGCGGGGACGGGAAAGAAGATCTCGGACGCAAACTTCAGCAAAGATCCGTCTCTCT  
GACTGCTCTGCACACGGGAAATGGGACGCAACAGCAATTTCTAGAACCAAGAATGGC  
GCAATTGGAGACATTGGAGGCGAAG

>novel\_circ\_000569

GATGTTGCGTGGGTGTTTCGCGTATACCTCGATGAATTATGCGTGTACATAGAGGATAGC  
GAGAGGGGGATAGGCGAGAAGAGTGGAGATCGTGTGTGTGTGTCGTCGTGCTGGAGACT  
ACCAACTCGGCCGTGCGTGTGTGTGTGTCGTGAAAAAAGAAGAAAGGTGGGTGTTT  
GTTTCTGAAAAGAAAGAAAATTATATATATTATCCTTATCCTTATCCCTTTCGGTGCTCTT  
TCTATCGTTTTCGTCGTCGTCTGTTGTCTCCGCCCCGAGGTCCACGTACCGATTCAAGTCT  
GGGAAGAAGCCTGGAATTCCCACCGCAAAAAAACTGCAAGCGAACGCCCTAAACAT  
TCCACGTAGAATCCGTAGCCGGTAAGATGATTCTTTCACGCGTCAAATTCCTCCACCGA  
AATAGATCGCCACGGTTTTATGCCTCTTATCCACGCTTAACCGCTTTTACGAATCCTTT  
TGTTTCGCAATTTTTATATATATATAGATCGCCGGCTATTCTTTCGGTCGATAAAATTTTCG  
TCTGAAATCTGTTCTATGAATTTTTTTATCTCGAACATCTTCCAACGATCTTATTGTTT  
TGCTATTACGGATAATACATTTTCATTTGTAAGATTATAGATCGATATCGCTTCGATCTCTC  
GGGAGGAAATTTTCAATTTCTATGGTTTTACTTTTCGATCGAATTTGAAGGAGGAAAAG  
AAAAAATATTCTCGTCTTTTTCTTCTTCTTCTTCTCGATGAAATAATTATTGTTTGCG  
CAATTTTTATCCTTGACATTCCACTTATTCCTTCCAAGCTATGAACTTTCGATACAGATCG  
CTATTCGTCGCAATTCGATCTTGAATAATTCATCGCGGTGGTGAAGGCAGAAACCGAA  
TATCTCTGAAATTACTACTATCGTTGGAGGTATGCTTGAAAAAATAACGTATACTCGAGC  
GAATGAATTTTACATCGTTTCGTTTCACTTTTTTTTTTTCGAAAATTTATCATATAAATC  
GATATCTTAAAAAAAAGTAAACAAATACGAGGAGGAATAGAAAATATACCTAGAAA  
TAAATCTTCTTCTTTTACACACTCTCTTTCTTCTGTTTCGATTATCGAAATATTTATCTTT  
TTCTTTCGAAAGAATAATTCTTCGATAAATCCATAATGGAACGTTTTTCAACCTTGAATT

ATCGTTTAGAGGTTACCAATTCGTAAACTCGTTAAAAAGCAAATAAATCTTTCCACGCA  
CCCTTTCTCGCCAATCTTCTCGATGATTAACGATGAATCGATCTCTCGATACCAAATAAA  
TCGAGATCTAGATCTGCTTTGTCCAAGAAAAAATATCTAACCGTATCGATCGTGTGAAA  
TTTCGTAGCGTTTCGTAAAACTATTTTATTATTTTTTTATAAGATTTTCCGCATAATTTGCT  
CGTAATTTGATCGTAGATAGACATAAGTACATAGACAGAGAGAGAGAAAAATGATTACGC  
AACGCATCTTCCAGAAACGGCAGGAGCAGTTTTACTCCTTGTTTCGTCCGAAGTTACGT  
GTACGTGAAATGCCATGTTTTTTTAGCTCGCGTTCCAAATCACCTTTAACGTTGCTTGTAC  
ACACGTTTCGTCCGATCAACAACCTTGAACGACACCTGAACGCGCCGTTTCGAATCCAA  
GTGTTTACCTCGGGTCGAGTAACAAAGACGACGCGTGAGAATAATAGGAGAGGGGGG  
AAATGACGGGCCAACACGTGGCAGCGTGCAAATAATTCCTCGATATTTACGCTCACCGC  
CGTTTAACAAGCGATAGAAATGTATATTTTCGCTGTGGCGAAAAATCTTTTTAATATTAT  
CCGAATGCACGAGTTCTAAAGTTAGACCAGCGTTTTTCGAAGGCGAGCCTTCGAAGTTG  
CTTTCTCAAAAATAGGTCTGAATGTAAAGGGAGGATAATAGCACGGCGGCCACGGCCATA  
CTCGCCGTCGTGAAAAGAGCGCGGCGTCGTGTACGATTCCTCCTCTTCCAACCGTTT  
CATGCATCAAAATTTATTATACGAGTTGTTTCGATCTGAAAACGATTTGCTCTATTTAACG  
ATATATTATCTTTCTGCAATATCGGTTTCTACGTTCTTGTACTATTCTTTTATTCCATTAATT  
CGAACATGGAAGAGATACATTTTTTATAGATTGTATTTCAAAGATCGTATATCGCATATACT  
TTTAATTGCTCCTCGTCACCAAGAAGATACGATCGGCACGTACATACTTGGACGAACAA  
TGTTTAATTTATATATACGTATATCGTAATTATATCATAGAATACGACGGTTTCATCATCGA  
CTCGACCATGTTTATTTCGAGGAACGGACGATAGAACGATACGTAGCGTACATATTTAATA  
AACGAGCCTTGACATCGCGTCATATACGTGCATAGGGTAACGGTCTATAGAAAGTAGAA  
AGCCGTTACGCAAAGTATCAACAGGTGTATTATTACTCGATTCATCCTTAAATACCCTAT  
TTTTTTTAATTGCTAAAATATCAATCAATTATCGCTCAACGCACTCGCGTAATAAAATCG  
TCCGATTTTTTCGATTCGAGCTCGAAGAATTTTCATATTCACATTCGTGAATATCGATCGTA  
AAAGAAAAATTCGATTTTTTAGAAGATTTTTTATTCCCTCGAAACTCGTTATCCAAACCGT  
GTTGCATCGTTCAAAATCGGAAAAAAAAAAATCCATCCAAACATTTTGAGTAATCTCG  
CGCGGTAAATAAAGTTGGACACGTCCTATTTTTCCATCTCGTGTATCGATCTCGTGGCA  
ACGTATCGATGGCAAATAACGAGTTTATTTTTAACGCGGTCTGAAGAACAAGTTGGCG  
AGTGACCGTACCGATAAATTACGCCTCTGATTCCGATCGCTCTTAATTGGTCGAAACGG  
ATCGGTTTTGCGGTCGATCGAATCGAACTTCCTTTTCGATCCCGTCCTCCTCGCTTTTTCC  
GATCGAGTCGCGCCGTCTTTCTTCCCTCCCTCTATCTCTCTCTCTGTCTCCTTTTTAC  
AGGTCGTTTAGCATCCAGAAAATGGCGAATTTCTCTGCTTCTCTTTTCAAATATCTCTCT  
CTCTCTCTCTCTCGTCCGTTCTTATTGTATCTGTCAAACCTTTTCGTTTCGATCGATTTTCGAG  
AAGAATTTTCTATAAACTTATACAAGATATATGTTTTAAAAATAAGAATAATCGTCGAG  
TAATCTTTCTCGTTGAATTTGTAATCGTATCACGCGGCAAAAAGTGACACAAGCTCGTC  
GAGAGTCACGCGTGGTATGTGAAAGGGTCGAGAGTCGAGAAAGTTATCCGTTTCGTTT  
CGCCCGTACGTTATTTCCGTTATTAAACGCGATACTTACTTTTTCCAATTATTCTCACACA  
GTCTCTCGTGTCTCCCATTTTCTATTCTCTCTATTTTTAGAACGATATCTTTGCACGAGA  
GGGAGTGAAGGAAGTTGGCGAAATGAGAATTCTTGAAATTTATTCGGATTAACACGGT  
CGGTGGGTTCTCGCGATTGAAAACCTCGACCGAGAGGCGTCGCGTCGGAAGCGAGGCG  
AGAAACGATGGAAAAACAAAGGGATATCCGTTTCGACGAGAAACCGTGATGAAATCCG  
TTCGTTTTCTTCCCTCCTCGAGCGCGAGGAAAACCTGTGTCACTTTCTCTCCGCATGCTTC  
CACGCAGGAACAATACACGCTCCGCGTTATAAACCCAATAATACAGCGTTAAACGTGA  
ATGTAATTGTCGATACGGTGACGCGCTCATTGTCGACGACCGGTGATCCTTTCTTATCG

ACCGTCGATACGATCCTTCGTATTAAACTAAACTCGAACAATGCTTCTTTGTCGTCTTTT  
CAAACAAACTCCATTTACACGCTTTTCTCTACTCCGTGGATCGAGAATCCTTTTATATCT  
TCTTCCCTTCAAACATTTTAAATTAATATTCGAAAATGTATCATCAAAGTGTGTAATTTT  
ATCGTATCTCGTATTTTACACGATATGAAAAATTGATGTATAATGTCTCGTCTTTCTCGAT  
GCGCGCTCTCTGTGCGTTATCGAATCTTGCTCACCAGATACTTACGTACACACCGTAATA  
GATTCGTGCAGTTGTCCAGATAGTCTCTTTTCAATGATTCGATCATATCGACCGTTTCGAT  
TTTAACATCGTTTTCCAGAATAATAGGAGCTAATCGTCAAACGAGTCACGAGCTCCACT  
TCCTTACCACCTTTCTCCAACTTTTTATTTCGAATCGTGTATCGTTATTTCTTCGACTAT  
TACAGTTCGTATTCGAGCTTCGTGAAAACTTTTTGAAATTCGAAAACGAAGTTTAAACG  
GACGGCCGCGTTATAGGAAAGAGAAGAAAAGGAAAATGGGACAATTAGAAAAATGAG  
ACTGCCGAGTGGGACGGATAAGAGTCCGACCCCTCGAGCACAAAGAGTTAACACGTT  
CGCCGCTACCAGAAAATGTCATGCACATTCTCATCCACTTAGCGTAAATAACGTGTAAC  
ATAACCCACGTATCGCGCGTATATCTTCTTATCGCCCCCTCGCTTTTTTTTCTCTCTCT  
CTCTTCATTTTTTCCCCCTCTCTTTCCATTATATCGTTATTATTGTTGTTGTTATTATTATTA  
ATTATCTATACCGTACGATAATCACACGGAGCAACGGGTTACTCCCTTCCGTTGCAGAT  
CGCAAATGGGCTGTTTCGGGAGCAAAGATAAGCTGAGCAAAGAGGATATGGATTTTC  
TGAAATCGCACACGAGATACGACGAGGCGACTATAAAGGAATGGTACAAAGGATTTAA  
AGTAAGTTGTTGCTCGAAAATTTGTTTTTCAAATCGGGATAATAATAATATTATTGGCAA  
GTTTCCTCGATGTTTTTTCAAAGTTGAGAGGAAATTTGATTCTTGGAGATATTGCTTAG  
AAATATTCTTCTTCTTGTGTTACAGCAAGATTGCCCCGAACGGCAGACTAACGCCGGCAA  
AATTTGTCGACATGTATAAAATGTTCTTCCCGTCGGGCAACGCGGAGGAATTTTTCGAT  
CACGTTTTCCGCACATTTCGACATGGACAAGAATGGCTACATCGATTTCAAGGTAAGAAA  
TCGATTTTTCTACACAATACTCGACTCTTTTCAACGCGTACAATAGAAATTAAAGCTTT  
AAATCGAATTTCGAAACGAATTACGTCCGTCATTCTTCCATCGAGAAAGAACGAATAA  
AACTTTTTAAATCGAAGCACCATTAATGATAAATAGCGTTGGTGGAATCGTTCTCTCG  
AAAAAAGAGGAGAAGAAGAGGAGGAGGAGGAGGAAAAAGGTGAGTACAATACGTG  
GAAAGGCGATAGAAGGGTGGGGCGATGATATAGGAATCTAGCCGATGGCAGAAATTGG  
CTAGAGGGGCCAGCACGTTCGATGGGGTCAATACGAGAAGTGAGACACTTCGGAGGT  
CATGAAGAGCAAAGAGCCGGCTCGCCCTCGACTTCGTTCTTTAAAACCCTTGCCGTTT  
GTCTACCTCAGGCGTAGGATGACCCAGTTCAACCTCTTGCCGTATCTACATCAACGCGA  
ATACTCTCAATTCTTTAACTCGAAACGATACGTTCCGTTAATATTGATCGAATCGATCATT  
TTACGTTCCAATAAATCTTTGAAAGTTCGTGGAAAATGTAAATTTCTACCCGATTTTCCT  
TTTTTTCAATTGCAACGATGAAGCAAGAGTGAACGTGAGAAGCAAGAGCGTTCAATTT  
GTCGTTGCAGGAATTTTTATTGACTCGAAACGATTTCGTTCCGTTAATATCGATCGAATC  
GATCATTTTACATTCCAATAAATCTTTGAAACTTTGAAACGTGGAAAATGTAAATTTCTA  
TCCGATTTTTCTTTTTTTCAATTGCAACGATGAACACTGAGAAGCAAGAGCGTTCAATT  
TTGTTTCGTTGCAGGAATTTTTGTTGGCTCGAAACGATACGTTCCGTTAATATCGATCGAA  
TCGATCATCTTAATACGTTCCAATAAATCTTTGAAACTTCGTGGAAAATGTAAATTTCTA  
CCCGATTTTTATTTTTTTTCAATTGCAACGATGAACAGTGAGAAGCAAGAGCGTTCAAT  
TTTGTTTCGTTGCAGGAATTTTTGTTGGCTCGAAACGATACGTTCCGTTAATATCGATCGA  
ATTGATCATTTTACGTTCCAATAAATCTTTGAAACTTCGAAACGTGGAAAATGTAAATTT  
CTACCTGATTTTTCTTTTCTTTTTTTTCAATTGCAACGATGAACACTGAGAAGCAAGAG  
CGTTCAATTTTGTTTCGTTGCAGGAATTTTTGTTGGCTCGAAACGATATGTTCCGTTAATA  
TCGATCGAATCGATCATTTTACGTTGCAATAAATCTTTGAAACTTCGAAACGTGGAAAA

TGTAAATTTCTATCCGATTTTTCTTTTTATCAATTGCAACGATGAACACTGAGAAGCAAG  
AGCGTTCAATTTTGTTCGTTGCAGGAATTTTTGTTGGCTCGAACGATACGTTAATATCGA  
TCGAATTGATCATTTTACGTTCCAATAAATCTTTGAAACTTCGTGGAAAACGTAAATTTT  
TATCCGATTTTTCTTTTCTTTTTCAATTGCAACGATGAACAGTGAGAAGCAAGAGCGT  
TCAATTTTGTTCGTTGCAGGAATTTTTGTTGGCTCGAAACGATCATTTTAATACGTTCCA  
ATAAATCTTTGAAACTTCGTGGAAAATGTAAATTTCTATCCGATTTTTATTTTTTTTCAAT  
TGCAACGATGAACACTGAGAAGCAAGAGCGTTCAATTTTGTTCGAAACGATTTCGTTCC  
GTTAATATCGATCGAATCGATCATTTTACGTTCCAATAAATCTTTGAAAGTTCGTGGAAA  
ATGTAAAACCCGATTTTTCTTTTTTTTCAATTGCAACGATGAACACTGAGAAGCAAGAG  
CGTTCAATTTTGTTCGTTGCAGGAATTTTTGTTGGCTCGAAACGATCATTTTAATACGTT  
CCAATAAATCTTTGAAACTTCGTGGAAAATGTAAATTTCTATCCGATTTTTATTTTTTTTCT  
AATTGCAACGATGAACACTGAGAAGCAAGAGCGTTCAATTTTGTTCGAAACGATTTCGT  
TCCGTTAATATCGATCGAATCGATCATTTTACGTTCCAATAAATCTTTGAAAGTTCGTGG  
AAAATGTAAAACCCGATTTTTCTTTTTTTTCAATTGCAACGATGAACACTGAGAAGCAA  
GAGCGTTCAATTTTGTTCGTTGCAGGAATTTTTGTTGGCTATCGATGTAACGTCTAGCG  
GGACGCCAGAGGAAAAACTGAAATGGGCTTTCCGTATGTACGATGTCGATGGAAACGG  
TGTCATTGACATTCAAGAAATGACCAAGATCGTTTCAGGTATTATATTCGTAATTAACAC  
GCACACTCTTTTTTCATACAAATTTACATCCTTCTTTCATCACGATTAGAAGATGATT  
ATTATAAGAATTGTTTGAAAAGAGAAAGAATCGTCGATTTTCATCCCTCCTCTCGTTCCT  
CTCGCAACGAATCGAAGACTTTTTTTTAAATATAAAACGAATGTATTGGGTGGCAACTA  
AGTAATTGCGGATTTTCAAGTTGATGACGACCTAATCAAAGCGATAATCGATTTCG  
GATCGTCACAGTACAACCTCGTGAGATTGCAGAAAAGCTTCATGTATCGCATAATGCAT  
TGAAAACCACTTAAACAACCTGGCTATGTTTCGAAAACCTCGATACATGAGTTCCTTAGT  
GAACTGAAAGAAAAGCATTTAACGCGACGCGTTAACAGCTGCGATTTGCTAAAGAAA  
CGTAATGAAAATGATCCATTTTTTAAACGACCGATAATTGGCGATGGAAAATGGGTGT  
TTACAACGATATCGAGCGGAAAAGATGGTGGAGCAGGCCACGTGAACCAGCTCGAAC  
AACGTCAAAAGCTGGTATTCGTTCGAAAGAAGGTTTTGTTATCAGTTTGGTAGGATTACA  
AAGGAATTGTCTATTTTGAACCTTACTATCCAACCGAACGATCAATTCTGTCGTCTACA  
TCGAACAATAACGAAATTAAACAATGCGGTTGAAGAAAAGCGGCCCCGAATTGACAA  
ATCGAAAAGGTGTTGTATTCCATCGTGACGATGCAAGGCCACACGCATCTTTGGTCACT  
CGGCAAAAATTATTGGAGCTTGGTTGGGATGTTTTGCCACATCCACCATATAGTCTGA  
CCTTGCACCATCCGATTACTTTTTCTTTTCGATCTTTACAAAACCTCCTCGAATGGTAAAA  
TTTCAATAACGATGATGATATCAAATCGTACCTGATCCAGTTTTTTGCTAATAAAAACCA  
CAAGTTTTACGAACGTGGGATTACGATGCTGTCTGAAAGATGGCAAAGGTCATTGAT  
CGAAATGGGCAACGCATTACGGAATAAAGTTATTTAGTTCCACGAAAAAATTGTCTTTG  
ATTTTCTAAAAAAAATCCGCAATTACTTAGTTGCCAACCCAATATATAGATTGGAAGATT  
CTCGATATCGAGAATGGTATTTTAGATTGGAATTTTATTTAATTGGAAGATAAACCGATT  
CGAGCAAAATTTCTCGTCTTCTCCTCCAATTTGAATATCATTTTTTCGAAACTCGATTTC  
TTCTAAAAGAACGGCCCCCTAATTGGCTCACAATTAACGAATTATCCGCACGCATCCAG  
ACGTCTAGACGTCTGGATTCCCCGAGGATTCGATCGATCGTTACGTAAGATACCAAGTT  
CCGAGCATAAAAGTTGGAGGAATAATCGAAAACGATGAATCGGATCGAAATTGTACAT  
CGACGAAAATATTCGAAGCGTTCGTTCGAACAAAATATTATTATAATAAAATATAAAAACT  
AGATATCGACAGAAAGAATGAGACGAGGAGAGTTATTGAAAAATTAAATATTTTTTAA  
ATATATATTACGAATAAAAGGAGAGAAAGAACAGAGATGATTCTGATCTTCGAAACGAG

GATGACGAGGAAAGAAATATTTCTATGAAATGGTTCGTGAAAGGCTGGCTCGGATGGA  
TGA CTTGGAAAAAGAAGGTTTCATCCACTTTACTACAATTAACCTTCGATATAACTCGA  
TCGATCCAGAAACAGGAGCAAATACTCGATTGAATGGAAAGTAAGCGGAGAGCACTC  
GGAATGCGATTACAACGCGATGACGGAATCCTGAGAGAAAAATGGATGGATGGAAGA  
AACGAAGGAAGGGAAGAAGTCGTTTCGCTCCACTTCTTCTATATACGATTCTGAATATCG  
TACGAATTTTAATATTTCTTCCAGCGAACAAATCCAACCTTTTATCTTTCCATAAAAAAAA  
GTCATCTTGTTTTCCAACGTGTTTTAAAAAATTCATTTTCGTTCGCCGAGAAAAATGGCCATC  
ATTTTTTTCCACCATTAAAAAACTTTATCGCCAAAGTTCGAAGAACGAAAAATTTTGC  
TCGAACGATACCAGATACAGATTTCGAAATTAATCAAGTTTTCTTTGAAAAATTCTACAA  
ATACTTACAATTAACGCGTTTCAATGTAAAAAATATATAAATATACGTAAATCAA  
CGTTAAAGGGAATAAAGTTTCGATGGAAAAATTCGAATCGAGTGAAAACGAAATCTGT  
AATACGATATCGTTTCTCGATTATTTTCATCTTTTCTCGAATCGGATACAATAGGTAAACG  
AAACGGAGAAAGAATAAATAAAGAAGAATAATTTGTATTTAAATTCGATTCAAATAA  
ATCGTGAAAACCTCGTATAGAAACAGAATAGAATGGAATTCTAATATTTTTTCATTCGAGC  
GGAAATCGAAAGGATAAAATCGAGTAAAAGCGAGAAAAGTTGCAAAATCGATCGATG  
GACGAAAGTGGAACAACGAAGATTAGAAAAGAAAAGAAAAGGATGATCGAT  
CGTTGCGTGAGAAACATCTTGTCAAATAACGAAATGTTTTCTGTTTGTAGGCAATATA  
CGACATGCTCGGTGCATGCTCGAGCAACAGACCGGCAGATAGCGCGGAAGAAAGAGC  
GAAGAACATCTTCGCGAGAATGGACGAAAATAATGACGGTCAACTTACCGAGGAGGA  
ATTTTTGAAAG

>novel\_circ\_000570

ATCGCAAAATGGGCTGTTTCGGGAGCAAAGATAAGCTGAGCAAAGAGGATATGGATTT  
TCTGAAATCGCACACGAGATACGACGAGGCGACTATAAAGGAATGGTACAAAGGATTT  
AAAGTAAGTTGTTGCTCGAAAATTTGTTTTTCAAATCGGGATAATAATAATATTATTGGC  
AAGTTTCCTCGATGTTTTTTCAAAGTTGAGAGGAAATTTGATTCTTGAGATATTTGCTT  
AGAAATATTCTTCTTCTTGTGTTACAGCAAGATTGCCCGAACGGCAGACTAACGCCGGC  
AAAATTTGTCGACATGTATAAAATGTTCTTCCCGTCGGGCAACGCGGAGGAATTTGCG  
ATCACGTTTTCCGCACATTTCGACATGGACAAGAATGGCTACATCGATTTCAAG

>novel\_circ\_000571

ATCGCAAAATGGGCTGTTTCGGGAGCAAAGATAAGCTGAGCAAAGAGGATATGGATTT  
TCTGAAATCGCACACGAGATACGACGAGGCGACTATAAAGGAATGGTACAAAGGATTT  
AAAGTAAGTTGTTGCTCGAAAATTTGTTTTTCAAATCGGGATAATAATAATATTATTGGC  
AAGTTTCCTCGATGTTTTTTCAAAGTTGAGAGGAAATTTGATTCTTGAGATATTTGCTT  
AGAAATATTCTTCTTCTTGTGTTACAGCAAGATTGCCCGAACGGCAGACTAACGCCGGC  
AAAATTTGTCGACATGTATAAAATGTTCTTCCCGTCGGGCAACGCGGAGGAATTTGCG  
ATCACGTTTTCCGCACATTTCGACATGGACAAGAATGGCTACATCGATTTCAAGGTAAGA  
AATCGATTTTTCTACACAACCTACTCGACTCTTTTCAACGCGTACAATAGAAATTAAAGC  
TTTAAATCGAATTTTCGAAACGAATTACGTCCGTCATTCTTCCATCGAGAAAGAACGAAT  
AAAACTTTTTAAATCGAAGCACCATTAATGATAAATAGCGTTGGTGGAATCGTTCTCT  
CGAAAAAAGAGGAGAAGAAGAGGAGGAGGAGGAGGAAAAAGGTGAGTACAATACG  
TGGAAGGCGATAGAAGGGTGGGGCGATGATATAGGAATCTAGCCGATGGCAGAAATT  
GGCTAGAGGGGCCAGCACGTCGATGGGGTCAATACGAGAAGTGAGACACTTCGGAG

GTCATGAAGAGCAAAGAGCCGGCTCGCCCTCGACTTCGTTCTTTAAAACCCTTGCCGT  
TTGTCTACCTCAGGCGTAGGATGACCCAGTTCAACCTCTTGCCGTATCTACATCAACGC  
GAATACTCTCAATTCTTTAACTCGAAACGATACGTTCCGTTAATATTGATCGAATCGATC  
ATTTTACGTTCCAATAAAATCTTTGAAAGTTCGTGGAAAATGTAAATTTCTACCCGATTTT  
CCTTTTTTTCAATTGCAACGATGAAGCAAGAGTGAACCTGAGAAGCAAGAGCGTTCAAT  
TTTGTTTCGTTGCAGGAATTTTATTGACTCGAAACGATTCGTTCCGTTAATATCGATCGA  
ATCGATCATTTTACATTCCAATAAAATCTTTGAAACTTTGAAACGTGGAAAATGTAAATTT  
CTATCCGATTTTTCTTTTTTTCAATTGCAACGATGAACACTGAGAAGCAAGAGCGTTCA  
ATTTTGTTTCGTTGCAGGAATTTTGTGGCTCGAAACGATACGTTCCGTTAATATCGATC  
GAATCGATCATCTTAATACGTTCCAATAAAATCTTTGAAACTTCGTGGAAAATGTAAATTT  
CTACCCGATTTTTATTTTTTTTCAATTGCAACGATGAACAGTGAGAAGCAAGAGCGTTC  
AATTTTGTTTCGTTGCAGGAATTTTGTGGCTCGAAACGATACGTTCCGTTAATATCGAT  
CGAATTGATCATTTTACGTTCCAATAAAATCTTTGAAACTTCGAAACGTGGAAAATGTAA  
ATTTCTACCTGATTTTTCTTTTCTTTTTTTTCAATTGCAACGATGAACACTGAGAAGCAA  
GAGCGTTCAATTTTGTTTCGTTGCAGGAATTTTGTGGCTCGAAACGATATGTTCCGTT  
AATATCGATCGAATCGATCATTTTACGTTGCAATAAAATCTTTGAAACTTCGAAACGTGGA  
AAATGTAAATTTCTATCCGATTTTTCTTTTATCAATTGCAACGATGAACACTGAGAAGC  
AAGAGCGTTCAATTTTGTTTCGTTGCAGGAATTTTGTGGCTCGAACGATACGTTAATAT  
CGATCGAATTGATCATTTTACGTTCCAATAAAATCTTTGAAACTTCGTGGAAAACGTAAAT  
TTCTATCCGATTTTTCTTTTCTTTTTTCAATTGCAACGATGAACAGTGAGAAGCAAGAG  
CGTTCAATTTTGTTTCGTTGCAGGAATTTTGTGGCTCGAAACGATCATTTTAATACGTT  
CCAATAAAATCTTTGAAACTTCGTGGAAAATGTAAATTTCTATCCGATTTTTATTTTTTTC  
AATTGCAACGATGAACACTGAGAAGCAAGAGCGTTCAATTTTGTTTCGAAACGATTTCGT  
TCCGTTAATATCGATCGAATCGATCATTTTACGTTCCAATAAAATCTTTGAAAGTTCGTGG  
AAAATGTAAAACCCGATTTTTCTTTTTTTTCAATTGCAACGATGAACACTGAGAAGCAA  
GAGCGTTCAATTTTGTTTCGTTGCAGGAATTTTGTGGCTCGAAACGATCATTTTAATAC  
GTTCCAATAAAATCTTTGAAACTTCGTGGAAAATGTAAATTTCTATCCGATTTTTATTTTTT  
TTCAATTGCAACGATGAACACTGAGAAGCAAGAGCGTTCAATTTTGTTTCGAAACGATT  
CGTTCCGTTAATATCGATCGAATCGATCATTTTACGTTCCAATAAAATCTTTGAAAGTTCG  
TGAAAATGTAAAACCCGATTTTTCTTTTTTTTCAATTGCAACGATGAACACTGAGAAG  
CAAGAGCGTTCAATTTTGTTTCGTTGCAGGAATTTTGTGGCTATCGATGTAACGTCTA  
GCGGGACGCCAGAGGAAAAACTGAAATGGGCTTCCGTATGTACGATGTCGATGGAAA  
CGGTGTCATTGACATTCAAGAAATGACCAAGATCGTTCAG

>novel\_circ\_000573

GATCAAGACAGCGAGATGTCCAGCGAGATGGCACACTGTCCAGATTGGTCAGCGACG  
GATCAATACGATTTCGCAGAGCGAAGGTTTAGCGGCGAAACTCGAAGACGTGAATCAGC  
CGAGTGCGAAGTCGGGCTACAAGAGAAAAACGACGGAGGACAGCTCGGAGGCGGAC  
TCGGAGGACGAGGAGGATGGTGCACAGATGCACAACGATAATGGAAGGAGAGTTAGA  
GCTAGATCGTTGATAGACGACGAGCAATTGGCTGTTCTCAAGGGTTACTATGCTATTAAT  
CCCCGGCCTAAGAAAGAGGAGATCAGCATGATCGCCAACTACATCAATTTCCCTACTCG  
TGTCGTGCAGGTTTGGTTCCAAAATTCCCGGGCGAGGGATCGACGAGAATCGAAAATA  
CCACCTCTAGTACCGTTGGCTAACCCGGCCAGTCAGACGACATACGAGCAACCATTGG  
ACTTGTCGAAGAAGGAAGGCCTCGCAGAGTCGGTGCGCAAAGACAGTAACGCTGCCT



GTGTAAAGTTTCGCATCTTCGTCTCCTGTCGAACAGAGGAACGATAATGCATCGTCGCAT  
AATCAAGACGCGGATGATTTGGAGGATTCGCCGCTCGTCATTGACGAAGAAACCACCG  
ATTCTGTGGAACGAAACGTACGGTCCCAACGGGAGAAATTGTTCCAAAG

>novel\_circ\_000574

GAGCACCTTCGCATTACAGCGGTGAAAAGCCATTCCAATGCAACAACCTGCGGCAAA  
CGTTTTTCCCCTCGGGCTCGTATTCGAGCCACATGACCTCGAAGAAGTGCCTGATAGT  
GAACTTGAAGAAATCCAGGCACGCGAACGTGAGCAACGTGGACCGCGGCTCGAAAA  
AGGCGCAACAATCCCTGCCGCCGGGGCGGCGCGATGTCGATCTCCTCGCGGCGAATAA  
TAACACTTTCCTCCCTATTCTGCCCAAGCTTTCACCCTCTGATTATCAGGAGATACAACG  
GGAAGGAGCGGGCATATACGACATGCCACCCTTCTGCCGCAAATGATGGGTTTCGGC  
AGTTATTTTCTGCAAACGTCCTTGGGCAAAATCTTAAATCAGCTACATTCCAAGAGATT  
GGACGAGGTAGCCGAGCAATTCGAGTCTCATCGGGAACCTATGAGCCCGTCCACGGCG  
GATTCCGAGGGGCACGGAGGGCACGGAGGGCAAAGAATCCCCGGCGCCCGCCGACCCC  
CAAGGCTTGGACGCTGTTCCCGTATTCTCGAAACGGTGAACACCTCTGTAACGAAAC  
AACTGCTCGAGGCGAACGTGCGAAAATTATCCACATCGCCTGCCACGATGAAACGGGA  
GTTTGAGGAGGATTATCAA

>novel\_circ\_000575

GTTGCAGCGAGGACGAGGCAGCAGGTGTCGCGAACGCGGAGGTGGGCGGAGGTTGC  
GCGGCCGGGGCGCCAACCACGGGAAGCGGGGGTGGGGGTGGCGGCGGGACAGGTAG  
CGAGGCTGGCGGAGGAGGAGGAGGAGGCGGCGGCGGCGAGGGCGGATCGACGAAAC  
AGGGTGGCGAGAGGTGTCCCCAGTGCGGCTTCCTCTGCCGGGACGTCCACGTGCTTC  
AGTCCATCTCGAGGACACGCACAAGACCACGTACGCCATCGACAAGAACGATCTCA  
ACGCTCAATTCCCCCAAGTGTCGTGCAAGGTGTGCAGCAAAACGTTCCGCAACGTCTA  
CCGACTCCAGAGACACATGATCAGCCATGATGAGAGTGCCGTGCTTCGTAAGTTTAAG  
TGTCCCCATTGCGAGAAAGCCTTCAAGTTTAAGCATCACCTCAAGGAGCACCTTCGCA  
TTCACAGCGGTGAAAAGCCATTCCAATGCAACAACCTGCGGCAAACGTTTTTCCCCTC  
GGGCTCGTATTCGAGCCACATGACCTCGAAGAAGTGCCTGATAGTGAACCTGAAGAAA  
TCCAGGCACGCGAACGTGAGCAACGTGGACCGCGGCTCGAAAAAGGCGCAACAATCC  
CTGCCGCCGGGGCGGCGCGATGTCGATCTCCTCGCGGCGAATAATAACACTTTCCTCCC  
TATTCTGCCCAAGCTTTCACCCTCTGATTATCAGGAGATACAACGGGAAGGAGCGGGCA  
TATACGACATGCCACCCTTCTGCCGCAAATGATGGGTTTCGGCAGTTATTTTCTGCAA  
ACGTCTTGGGCAAAATCTTAAATCAGCTACATTCCAAGAGATTGGACGAGGTAGCCG  
AGCAATTCGAGTCTCATCGGGAACCTATGAGCCCGTCCACGGCGGATTCCGAGGGCAC  
GGAGGGCACGGAGGGCAAAGAATCCCCGGCGCCCGCCGACCCCCAAGGCTTGGACG  
CTGTTCCCGTATTCTCGAAACGGTGAACACCTCTGTAACGAAACAACCTGCTCGAGGC  
GAACGTGCGAAAATTATCCACATCGCCTGCCACGATGAAACGGGAGTTTGAGGAGGAT  
TATCAA

>novel\_circ\_000577

GAATAATGCACATAAAGAGGGAAGAGACCAATGGCGTTGAAGAGCGGCCTCGAAGGA  
AGGGTTCTCACAGGGCCACGTCGCAGGTCAGGTCTTTTGCGCTCCCTCCTACAGTAAT  
CCATCACATGGCGTGCAAATATGGCTAGTGAAGTAGCCATTGTTATGATACATTTGTTTA

AATTATTTGGAAAACGTAAGAGAAATCATGTTTGCTCATAAATTATTGTCAGGCTATTGA  
CGCTACTCGAATTATTGAAAACACAGACCAGGTTACCCGACCGATTTCATAAGCCTGTCC  
TTAACATTTGCATTAACAATATATTTAATTAATACCAGGTTTATAATTATTTTTTCATTTCGC  
TATTCAATAAAATGAAAAATATGCATAATACTAATTTTTATTCTAAAAATGTAATATTATAA  
TTCGTTACTTTGTATGCACAAATTCCGTCCTGTAAATTTCAATCATGTCATTTTTTAAAT  
ATAAATATACATATATAATTGTTAAGTGTGAAAATTGTGTGAAAATATTTTAATATCTGAA  
AATGTTTATTACAAATTTAAAAATAAATTTATTATAAATTAATGAACATAATTGTAAATAT  
GTTGAAAGTCAATTCCTAACATGTTAAAAATAAATGTAAATAATTTTTATATGAAATAAC  
ATATAAAAAATTAATAAATAAATGAAAAATTATTTTCATACAATAAAATATAATTATAACA  
AAATATTGAAAGAATATTATTATGTACGAATGCATGAATGAGTAAAGAATGAGAGGTGC  
AATTATTCTATCTGTTTGTAGAGAAACAAAATAAAAAAAGCTAGAAATCAATTGAAGA  
AATAACTTTGTAATGATAAGGCGAATTTTGTATATTCTTCTTTATATTTTTTATTAAATTTT  
ATTTTCATCCAAATTTTGATTATTAGAATTATTCGGTATTATTATTGTGTAAGTTAATTTTT  
TTTCAAATAAAATTATTATCAAAAATAATTTGTGCGGAAAATAATTTTTGAATTATTATT  
ATTATTATTCTTGAATAATAATAATTTATAATAAAGTGAGACAGATATGTAAATATTTTTTT  
TAAATACATTGTGTAAATTTTATAAGATGCGAAAGAAATCGTAGAAATAGTGTTTATAAC  
ATTTAAATAAATTGAATGCTATTAAATAATTAGATTTCAATAATTTCTTTTGCATGTGTTAA  
AAATAATAAATAATACAAAAATCAAATGTGAATAATATAAAAAAGAAAAATTTATTAATTC  
AATTTAATTTTTATAAATAAAAGATAGAAATGTGTTAAGTAGAAGTTAAAAATAATATAT  
AAATAATAGTATTATTGAATTAAGAGATAGAAAGATTTTATCTTTAGTTTTGACTTATTTT  
TTAAATTTCAAATTTTTGGTTTATATAAAAAAATTATTTTTTATTAATAATAAATGATTTAA  
TATTAGTTTATTATTATTTTAATTGTAATTTAGTTTATTATTGTTTGGTAAAAAAGAATTGT  
TTATTATTATCTTTCCCAAAGAAAGGATAAGCTTGAATATGCATTTTTATATAAAATCAAA  
ATGTATACTAAATCATTTATTTTTTAATTGATATTTAAACTTACATAGTATACACAACATGGT  
GTAAAATTTTGTTAAAATACGTGATTTAAAAAATTATAAAAAATGATTTTTAAAAATAAT  
CTTTAATTGATAATAAAATTACATAGTTTTTTTTATATAATTCAAACTATATTAGCAAAATA  
TTATTTAAAAATGTTATTGAAAATTTTTTATCAATTATTATTATTTTTTCGTATTATTATTTA  
TGATCAATATATTATCACTCATTTGTTATTATTATAATTTATTTTTATGTAAAAATAACGA  
ACATAATTTTGAACAAAAAATTTTTTTTTATTCTTCTTACTTTATATTTTTACTTTCTTTTC  
ATTTCTCTTTATTGTTGTCTTAAGTTATCAATTTTTAAATATAATTTTTTATATATATTCTCA  
TAATCTTTTTGATATATAATTATATAATAAAATGTATGTTATGTAATTTTATGATCAATTAAA  
TAATTTTGTGTTTATCAAAAAGTATTTAATTTAATATTATTAAAAAATTAGATGTTGATT  
AATATTTAGATGTTTCGGATTTGTAGTTTGTTACATACATTGAGATTTTGTATAAGATATAT  
TGCATTAAAGATATAATACATTATCTATATACATATTTATATATATATATATATATATATA  
TATATATATATATATATATATATATATATATATATATATATATGAGCAGTAAATATTATGTAATGCAGAAT  
TTAATTTTATTTAATTAATTAAGTGTAAGAGTCTAAATATTGATTTTGATAAGTATATAA  
TAATAAATAGATTTACTAATTTAATAATATTAAATGAATAATTCTTCAAATAATATCATTT  
ATGGAAATATTTCAAGTTTTCTAATTTTATTCATATAATTTCTTGAATTCCTGCTACAA  
TAAAATGTTAGACAATGAAATGAATGAACTTTCACAAATAAATTTTATAAATTTCAAATT  
ATCTATTTATTTTATTTAACATTACCTAAATTATAATACTTTTTTAAAATGATAGTTGATAGT  
AACATTTATAAGATTTTTATAAGATTTTATAAGATTTTTTTTTGTAGATTTAATAAGATTT  
ATAATTAAATAATTATAAATATATTTATAGTAATTTATACCATTTTTTACAAAAATCATAAG  
ATTTAAAATTAATAATTGATGAAAGGAATATAGTTATCAACGAAATAATATATTGATAAT  
TTTATTTTAAATATCTGAGACAAAAAGTCATAAGATTTTTTTTTAAACATTATTTATTTTGC

AAAAAATATAGAAATAGTCGTTGAATTCTACCAATACGGAAGATGTAGATTTCTATCAA  
AATCTATGGAAATAATTTCTTTATGAATTAATATATCATATTTGACTCTAGAGAAATAAAA  
ATAATATTTATCGCATTTTCGAGATCATGAAAAAGAAAAAAAATTATGTTTCCTAGTTTA  
TAAGAATTTTCCTACCGATTTTTTAATTAATTCTAAGGAATTTAATAGAGTTAAAAAATTTA  
AGTTGGGAAATATAGAGCATTTTCAGTGAAATGATATAATAATTTGATATGATATAATATGA  
TTATATGATAATTTATCAAAATTCATTIATGATGTGATATATTTTCTTAACAATAATAAATT  
ATATTTCAAGTATGTCATTTATACGAGACTTAGATTTCTCATATTCAATAATCAGAGTAGA  
TGC GTAATTACAAAGAAAAC TATTTATTTATCATATTCCATCAGAATACAATATGTT CACA  
ACAAAAATTAAATAGAGTTAAAAATTA ACTCTGCAGATTCATTTTTTGATGAGACTCTC  
AGAAATTCCTTCCATAATTGGCATCCTAACTTGCAGTATTTTCAAGTAAGAGAGAAATT  
CCTTAAATTAAGCATAAAAAATATGATGATAACCAGAGATTGATCAGCATATATTTATTAT  
AAATTTCTCCGAATATAGTTAATTGCAGTTGAATCAATCATATTTAGAGAATATCATCCTT  
AAGATCGTGTTTCTAGCCAAGCTAAAATATGTTAAATATATAGAATTGTGTTACCTAAAT  
CTTCCTTTAAAGTACCAATCTTCTCAGATAACATCATTCTTTATTTAACTTAGTAAGAGA  
ATAGCAAATAACAGTACATGTAATGAAAAAGTTTTATGTGAGGAAGAAATAAGAAGA  
ATACTTATTGCTTACGAATGAATATATATATTATTACTAATAAATAAATAAATAAATAATAT  
ATATATATATATATATATATATTACTTAATAACTCTTGATTAATACATCTTAATAATTTTCGTT  
TGATTTTTTTTTTTATCAGATTCATCATAGTGAATCAAAGATAAAAAATTTTTTCTAATTTA  
TATAATTTAAACAAAAATAAAAAGTGATAACACGCATCAAATTTGTTTATTATCGAATT  
AACATATTTACAAC TTTTCAACAAACAACAAAATTGTACCGTATCCATTTCAAATATTAT  
TTC ACTGTCTCTCAATAAAATAATTTCAAATATATAGTTTGTTAGAAAGTGATAGTAGATT  
TTTTTAAACTCCAATGTTCTTTTGTTGAGAATATTAATGAAATACGTTTGCAGTTGATTAT  
TAATAAAGATTTGAATAAGATATTTCAAATAACTTTTCTATTGTGTATTGTTTCAGTTATT  
TTTGAAATATCAAAAAC TTTTTTTTAGAAAAAACTTTAAAAAAAATACTATAATAATATT  
AGAATTCTATAATAACTATAATAATAAGAATACTATTAAAAAAAAGTAATTC TTTTTTT  
AATATTTTTATCAATTACTTATGAATTTGTTTGTTTTTTTTTTCAAATCAAAAAC TAATAA  
AGTGAAAAAGTG TACTTATATTGTATTTGAATATTTAAGCACAATATTATACAATAAATTC  
TTATTCATATATGTTAAAAATGGAATAATTTTAAAATAGTATATTGCCATAAAAAAATGTT  
ATAGTATTAAGATTTAATTTTATTAGAAAAAATAATATTATATTATATACTTAGAAAAAAT  
TAATCTATCAAAAATATTTTTCATTTATTTATCTTTTAAATTTAATACAATATAACTTATGAT  
TAGATAAGGCAACGAAATAAATATCTATTTTATTCTACCTGTGTCATTATTTTATAACGTC  
CATTTTTTCCATTGCTCGCGATGTTTATAAACAGCTTATTCAAAGATTTCTCATAAAAAATC  
TTTTCTGTATATAAACGCAGACTTCTATTAAGTCTAAAAAAACACTCACAATCTAAAACA  
CAAAGGATGATATTATTTGAGAAAACTGTGTTTTTTGAGACTTTAGTCGACAATTGTATA  
TTTTTGATACACTTCAGCCTGATTGGAGCACAGCCCTATCCTAAGAGTGACATATTCCA  
AATTGATTTCCAGCTGATTCAACAGCAATCAATATCATTCTAGTTTCGAGGAATTTTTCTC  
AAATTTGGGGAGTCACTGATCGCAATGTTATTGTTTATTACCGTGCTCTACCGAAAAAC  
TGAAATCTTTTGAATTAACTAGGAAGGAATTTTTTTGAGGACACTTATAATTTTTTTGAGT  
GTTACTTATAAATAGAAGTTCAGGATGAACACGCTAGATATAATAATTAGTTTGTGAATA  
TATCATGCTCTGATCGTCGAATTATTTATTGTTATTTGTAAAAAAAATCTCATTGTGA  
ATAGATAGTAGTCTGATCAATACTTACATTAATTACATAGTTTAGTTCTAATATCATATCGT  
GGTCTGATACGATTATCTGCTGCGACATTGTGAGAGATCCTGTTTTTTTATATAGATACG  
CTATAGATGCGCCATGTAACCATTTTTACAGTTTATTATCTTTTAGAAATATATCAATTAT  
TATGACATGTGTCAAAAACATTTTACAAACACTCAGGTATTAGTTTATATCCATCATCA

TTACACAATAATATTGTTACGGGTGTGAACATGTATAAAAAGAAATTTAAAAAATATTG  
AAAGTATTGAAAAAGTAATAATTTTTTAAAATAATGTTTTTTGAAATTGATATGAGACTA  
AAATATGTAGCTATGAATAAAAAGCACATGAATCAATTGTCAAAAAGAAAATACGAAATT  
GTTGTATAGAAAGCAAGTGAAATTTATAGTGAAAAAGAAAAAGACAGAAATCTAGAC  
AAATTTACGTAATGAGATTTTTATTATAATTTCCCATTTTTTTGTTCTAATATATAAGATT  
TAATATAAGATTTAAGATTATAAAATTTAATATAAAATTTTATGAAAAATTTTTTATTGCCT  
GTAATAGAAAATTATTGTAATGAATTATTGGAACCTCTAAATATGCAATATATTTAATAAA  
ATAAAAAATTTTAATAAAAATTAACAGTAAATATTTTTCTATATTACGAAAAAATGGATAT  
TTTATATAGATATATATATAAAATTTAGCAATATTGCATTATATTTAAGAAACATTGACAAT  
CAAGGTATATATTTTATTAGTGTAGCATTTTGTAGCGGATTATATATGTATGTATTGCGATG  
GTAATTTATTTACACATATTTAAATGTATATTTATAATTAATATTAATATATATATATTAATA  
TTATATAATATATAAATTATTATATAATATATTTCTGTTAATATTGGCTAGTTGATAATAATAG  
ATCAAATGAACAATGTTGTTTTTCATTTGTTGTTTTATTATTTTATATATAAATAATATAATT  
GTTTTTTAAATTATTCGATATAAGTTATAATATATTTGAAAATTTAAAACAGTTATAATACT  
AATATATGATAATCTACGAAGCTTCTTTTTTTTTTTTCATTGTAATATTAAGTATAGATAT  
GCATTTTCTTAAATGTATTGAATATGATTTATCATTATGACTCTTAATATAATATTAATTA  
TTTCTTAGTATTAGTATATTAATTATGTAACCAAGAAAGATCTGTCATAAAAAACAATT  
GAAGATTAGATACCAAAAATCTTTTAAATACATTAATATACATTAATAGAAAGTTTATGTA  
ATATTATAGACTTCTTTCAAGAATGTAGAATATAAAATCTTCTTTTATTAATGAATAAAA  
AATTACATTATTAATAATATTAAAGGATAGTAGAAATAAAAAAATTTAATTAATTCATTATA  
CATAGAATGTAAATTCTACTATATAATTATCTGCAGTATTAATATTTTCGTAGAAATATTTGA  
AAAGAATAAAAAACAAAGAGTTTTATTTTATATTCAAAAATAATAATCATTAATATTATTAC  
TTATAATATTATTCTTTTTATTAATTATTATTTTCATTGAAAGCATGAGCATTAAGAAAAA  
TTATTTTAAATAAGATATTTTCTTTTATATTTCTTCAATTTTTCTTTTATCATATTATATAAAT  
AAATGTAATAATATATATTATATAAATATAATAAAATTTTTTTAATAATTTATAAAATTATTA  
AAATTTATTATATTATCTATTATACAATTATTAATTTATTTATTATATATTTATTATATAAAATT  
AATTAAAAAATTAATAATTTATTAATATTTATAAATATGTATATTTAATATTAGAAATAAAAA  
AGAGGAAAAATATAAAATATATAAAAAGAAAAAATTTTGATTAACGAAATATAATTGCA  
CGATCGAACAAAGAAAAAAATTAATCTTTAATTAAGAGCAAAAATTTTTTCAGGGATATA  
ATAGCGGTTTTTCCAATATGATTGCACATGAGAAAATAACCTTTTGCATGTTTTTAACGG  
TTTCATTAAAAATCTATGCAAATATGAATCCTATAAAAAAAGTTCTTAATTCCCCTCTAC  
GTACATGAAAACTCGATCAACAGTTTATGTGTTTATTTTTTTTATCTTATTTTTTTGTTGT  
TGTTGTTATTTCTGCAATTAAAGAAGTTCCAACAAATAATTGGCATAATTCTTCATAAAT  
GAAGAATTTTTAATTTTTTAATATCTCTTTATACTGACTTATGTTAATCATGTAAAATTTGA  
TATTGGTGAAATAATAAAATTTTATTATTACAATACATAAATAAATTTTGTATATCGTATGA  
TTATATATCAATATTTTGCATCAACTGATTTAATAAAATAATTAATATTAGAAATATAATTA  
AATATTAAAAAATTTTATAAGCTTTAATCAATTCTTAATATCAAACATTTTTTCATACGAAT  
TTATTGAATTTTCTTCAATATATAATGAATTTCAACTATTTCAATACTAATCATATTTCAAT  
AAAATGCAAGAAATATATAATGATAGGAATACAAATTTTATCCTAATAATATATTGTTAAA  
ATTATCATTTCTAAATTATTAGATATCCAAAATTATATCCTTAATTACCCTTAATTTTAATG  
AAGAATTAATAAAATATTAATATTTAATTAATATTTACTTTGGAATTTAATATGCAATATTT  
ATTTACATTATTTACATTACATTTGTATATATAGTTTTAAATTTATATAGTTATTTATTATACG  
AAAGAAAGAAATACAATATTCTTTAATTTTTATCGAAATAATATAAAAAATCTTTAAAAA  
TAAATGTTTTTTTTTAATTTTTTATTCTACAAATAAATACAAAATTAATATATATATCAAAG

ATTATTTTAAACATTTAGTTAATGAAAATAAAATAAAATTTATTCTAAAATTTTATACGT  
TTTGTTGTTTTTAATACAAATTTATCTATTATTTTCACAAATAATTTTATATAAAATTTTT  
ATATAAGAAAAGTATAAATATAAATATTATCGAACTGATAGTAGAGAATAAATTTGCATA  
AAAAACAAGTTGAAAATGTAAAATATTTTTTTGTACAAAGTTTCATTTCTTATAAATAT  
ATCAAGTATTTATAGATTTATATTTATAATATAATAATCTTAATAATAAGCAACATAATATT  
TTAAACGATTTATATTTATAATTTTATGTACATTTTCATTGTATCATGATTAAAAAAAAT  
TTAGTAATTTAACTTACGTTAACGAAATGAATTA AAAACCTAATTTTCATAATAGGATAA  
CTATATAATAAAATCTTGAATTTTTATTTATTCCTTTTATTATATTATTCTTTGTCAATTCTT  
TTATTATTTATTATTATTTATGTAAGTATTCTTAAATAAAAAAGAATATTGATTATTGAAAA  
TAATTATTAAATAATGTAATTATTGTTAAAAATTTAATAAAGTATGATTTTAGATTTTCATAA  
AAAGATTTAGATTTCTTAATTGAACATAAGGATTGAAAATTATATTTATATTATAAACTTT  
GAATGAATTTAATGGTGATTAATTCTATCTATTTTTGTAGCTGATTAATGATTGATTGAAT  
TCCATGAATTAATTGTTTTGACTCCTGCGGCGATTAATTGCTATTTGATTAATTTCCACG  
TTTCTAAATGATATCTAATAAATTCTGATTTTCTGGAAAACCTGTTATGAATTTTTAATTATT  
TTTCCAGTAATTATTTTCGATGAAAATATAATTATATAAACTATATAAACTATATAAACTAT  
ATATATAAACTATATATATAAGAAAAGATAAAAAAGAAAACCAATAAGGGAAATTTTTA  
AAAATAAATCTTTGAGATCTCAATGTATAAGAATAAAGATTTTGCAACTTTTGCAGGA  
CTTTTATTTTTTGAGTAATTGGACAAAATATTTGGGATGCAAATATGATTTATGAAATAGC  
TATCGCTAATGTATCGAATAATTGTTATTGAGAATTTAGAACAATGTAACGAAATTGTAC  
TTACTCATAAATTACTGTTAAAATCTAAACTGCTAAAAATCTAAACTACTGAGAATGTTG  
AAATCGCTTCATAATTTTCAGTCTTGGTTTTTAATAGGAAAAAAGATCCTTAATAAAAA  
ATAATCGAAAAGCTTGCTAATTAACCGAGATAAAAAATATTATTATATCGTGAATTATATTC  
AGTAATAAAATAATTACATGAAAGAAAATTGCGCAATAAAAAAATTTATTTGAAATTGTT  
ATATAGCCTTAGTTCAAATCCAATATGTAATTCATTCAATTGAAATTTATAATATTCGAATTA  
AACATCAAATTTATTTTTTACAAAAATTCTATTTAATATAAAATCTTAAAAAATAAATTC  
AAATCTATTTTACTAATTTTGAATATTAATTTTAATATTCTTTTCAAATATTTATATACTTG  
TATCCTTTGATCTATAACATAATTGACGACTATATTTACTTTAAATTTCAATGAAAAATAG  
AAAAATAATGAAATAAATTAATTTAATTTAATTTTCATTTTAAAATATTTTCATAAATATAT  
ATGTATACACATGTACATATATAAAATAAATAATTTATATATAATTTTTTCATACGAATAA  
TGTTTAGCATTATAATTATATATTTCAATTAATATATTTATTATTATATTTCAATCGAATATTA  
TTTGACGAAGAAAGCAACATGATCTTTTTTTAATTGTTTTCTACTGATAAATCGAATTTG  
AAAAGTCGAATATTTCCAGTTTTTCTTCTAATTATCTAAAAAAAAGAATTGGAAATTG  
GGAAAAAGTTTATATGATCTAATTTTATTTTAAATAGCATAAATTTTACTTTGTTGTTTCTA  
TTTTTAAACTTTTCTCAACAGAATACAAGGATTCTCTGTGCACGTTTCGTAAAAACTTAC  
GAATATTACATAATTTGTTAATTCACTATCTGTTCAATTAATCGTCATCGCGTGCAAAAAA  
GTTTTTTAAGTATGCATTTTTTCATCTGAATTTCTCTTTTATTTAAATTTATTTTTTCTTTCA  
TTATTAATACTGTATTTTTTTTTAAGAGAGAAAATGAAATGAAAAATTATAACATATTTAAA  
GTAATATTAATAAAGAAATATAATAAGGAAATTAAGATATATGTATATGTGATCATTCAA  
AAAAATATAAATAGTTTACATTTTTCATTTCTAGAAATAAAAAATCAAATTTGAAAATTTG  
TATAAATAATGTAATAAACTATAATATATATATTATATATATGTTATTTAAAATTATTTATTT  
TAATTTAATAAATAATTTTAAATTAATAATTATTTATTTTTTATTTTTTTCAAATCTATGAAATA  
TTTTAAAAATTAAAAATTAAATTTTTAAATTTTCCTTTAATTCTATTATGATCTTTGAATTT  
TTATATCTTTTTGTGTTTGATTTATATTTTAACTTAGTTTTAAAAAATTTATTAACG  
ATAAAAAATCATAATTGATAAAGCTAAAATATTTCAATAATTAAAAGTCAATAAAATTAA

CTGTAAATCACTATTTAAAAATAATGTATAAAAAAATAAAATTAAATAACATTTTAAAA  
AATTTCTCAAAAAACAAAAATACTTTTTTTTTCTCCTTTTTTCACTGTAAACAAAGAA  
ATATTTAACAATCTTGCGATAATTAAAAAACGCAATAAATCAATAAATTATGTATATTTT  
TTATTATTTATATATAATATATATTTGTATACAACCTATACAAGTTTGTGAATTAAAATTACA  
TTAACTGATCAAACACGTCGAATAATGCTCGAATAATTTTGTTTAAAAAAAACGTTATAA  
TAGTAAATAAATTTGATTTTTCCATAGATAAAAAAATTTTGATTTTTATGTTCTTGAGCT  
TTAGTTAGGAAGTTTACAGATTAAATTATTTATATATAGCGAAACAAAAATTTTAGAATAT  
TAATACGTAGTGTTTCATATATTGAATTACTTTTGTAGATCATTATTATTAATAATTATAAAT  
TAATTATAATTATTAATTTGTTTTTTATTAAATTCGGATTTTCGTTAGTTTGGAAAAATTTTG  
AATTGTTAATCGCTTTTTTCATTATAATAAAATATTGCTTTTAACTGATGTATCTTACAATT  
ATATAAAAATTTTACTACTAACATAAATATTATTATATATATTCATATTATATATAAGAATATT  
TATAATAATAATTATTATAAATAATATTAAGAAAAGCATCTTATGAACAAATTGATTATTGT  
AACAAATGAAAGATATTATATTTAATATATATCTAATATCATAAATATTTGTTTACTATTAAAA  
TTTAAGAAATAAAATAAATACTTAAGAAATAAAATAAAATTTAATAAAAAATCTAACTACA  
TATTAACAATAACTATATTATTAACAATATATTGTTAATTTTAAAAAGATTTACAAGTAATC  
TAATAAATTGAGAAATTTAATTGAATATAATTAAGTTACAGAATGATTGCTAAATTGAATT  
TATGATGAATTTTGCTTTTTTTTATTTATTTTGAAGCAAAAAACATTGTCTATTTGATAT  
TTGTTCAATAAAATTAGTTGTTTGTTAAATAACAAATGAGAATGAGATTTAATATGTAAT  
CTTCCAAATAAAAAACGACAATTAGAATATTCTTTTGTAATAAAAGAAAGTTAAAGATTG  
AAAAATTTTATTCGCTCAAGATATAGTATTTAATAAATAATCTTCAAACAAATTGTCCTTT  
AAATTATTATGAAAAATCTATTGTTTTTAATTATTGTATATATAAAAAATTTAATAAAACCAA  
ATAATATCCAATAATTGAACATTTTAAAACAAAAATTTTTTTATCGAGAAATATCGTAATT  
AATGTAATTAATTTTTTTGATATAAAATCTTTTTTTTTAAATACTATGAECTATGTATTTAA  
AAAAAAGTGAATCGAATAGTGTTTGATATTCATTTCACTATTGATTATTTTATTTAACATA  
ACATACGAAAAAAATTATCTTTGTATTAGAGAATCGTAATGATCTGTACAAATAAATAAG  
TGGCAAGGATTTAATCTGATAATTAAATTTTTTTTTTAATCAGAGTCGTTATAATCGTAGAA  
TTGAAAATGAATGAATATGAATTAATTTCAATAATTGAATTGGTGTTAATTCCATATAAGT  
ATGAAAATATACGATATAACTTTTATAGATATAATTTTTATCTACAAATGAGTTTAATAATA  
AAAATATCTAATTAACAATTCATTTTTATATAATAAATAATAAATAAATAAGTAATCATATCA  
TAATTATTTTTCTTCAACAGTTTAATAATATTTTCATTATTTTAGTATGAAAGTAATTAATT  
AATATAAAATTAATAATATTTCAATTGTTTTAATTTTTAATTAGATAAATAATTATTTTTAA  
CAATTTCAAATTATTAATATCTATATTTTATTTTATAATATTTACTAATATTTACTAATATTT  
AATATTTCAAATAATTATATTTTTAGCAATTTAATTAGTTTATATTTTAATTAGTTTAAAAATA  
ATTAATAAATAATAAATAATATAAATATTAATATAAATATAAATAAATAAATAATATTATTTTAA  
AATATTATTTAATTTTAAATATTATATATTACATTAATAATATATAAATAAATAATTAATATT  
AAAATAATATTAATAATTAATATTATACACAATAAATATTACATTAATAATTTTTTAATTA  
TTTTAAATTAATTTATATTTTTATTTTATTTTATTTTACTATTTAGTATTTATACTATTAT  
TAATTATTATTATTATTATTATTTTATTTAAGCTTTATTTTGTAATATTTTAATTATATTA  
AGATTTGATTTAAGATGTTGTAAAAAATAAAATAATAGAATAAGATCTAATATAATACAAT  
ATAATATAATACAATACAATATAATATAAAGAAATATTGAAAATTATATTTTTTAAAA  
ATAAAATTAAGATATAATAAAAAAGATAAATGTAAATGGAAGAAATTAAATTTAATTCTA  
AAAACATCAAATGCAGACATAAGAAAGTAAACTATACTATTTATATGTGTAAAAATAA  
ATTATATTACAGAAAAATCATTTTCAATTTTCATGAATTGGAAAAATTTATTTTTTAAAAAT  
TTATATAATATCTATATTTTTATGAAAGCAGGTCAAACAGAAAAATATCTTTTTGTCACAAA

TTAATCATTTTCCTTGTAGTATTGCAAATTGTTACATTATACTATAAACAATTTTATTTTC  
TTTTTCACTCTCTTTTGTGCTAAAGTAAATTTAAATTGCTTACAAATAAATCTTAATCGA  
CGTTTTTACATACCACTAATATTTTTTCTTAATCTTTATCATTGATATCTCTGAATATATTAA  
CACTCTATACTCTTAAAATATATTAAAATTTGATAAAGTCAATTAATGAAGTTCATAACTA  
AACTTTATCAATATATTATTTTATGAATAAAGAAATAAACTTATATAAAATATTATTAATATT  
TTATTTATTTATTTTTATATTAATGTTATTATAATAATTATAATAAAAATTTTAGTCATTTTTT  
AATATTCATTTTATGTTATTTATATTATTATTATTATTATTATACTTTACATTACGTGCATAT  
TTTATAAGATATAAATTTATAAATTATTCATTAATAACTTTTACTAAATTCTCTAATATTTAT  
TATAAATTTATTTTCTTTTTATTTTTTGATATAATTAAAAATATATTTAAAACCTTTAAATTCT  
TAAATGATTAACCTGAAAATTTTAAAATATATATATATATATGCTATATCATACATTTAATCAA  
TTTATAAATTTTTACAAGTATGCAATATTGGTTATTTATATTATGTTTAAATGAAGCAATTA  
GGAAATTTGTTTTTTTTTAATTTTTTGTATTTAGATTAAAAAATATTTTTAAAGGAAATT  
AAAATTTTATTATTCGTCTTAATTAAAAAAGAAATATATTTTCATTTGAAAGAAAAGAAA  
AAAAATATTTTCAAATCATTGAAGAAAACCTGAGTAGAATTAATTTTTATAGAAAAAATTT  
AAATACTAAATTGAATCTGAATTTGCTACTTTATAAGTTTTACAAAAAATTGAAAATCAA  
AAAATAATTTATTTAATTCACAATTTTATTTTACAAATTTTTTTTCAGGAAATTTATCAATA  
ATAATAGTCATATTTCTACTTTTCGTTTCTATGTTTTAATATAAGATTGATTTTATATATAATA  
AAATTGTTAAGGACAAAGCTTGTGAAATCCGGTAATCTGGCTTTCATTTTCAACAGCTA  
GAATATCTCCAAAAATCTAAACAATAATTTATGAGGATTATATATATATTATAGTTTCTTAA  
TATTTTCTAAATTTTCAATTTAATAAAAAATATTACAGCAATGGTCAACATTTTCATCACAC  
AAACTGTACTTGTACGCATTGCGATGGATCACCATGAAAGCGAGCATAAAAGTCCTGAT  
TCCCATGTGCTGTGACGCGAAGGCCCATCCTTCGTCCTCCAACGCAATGATTGGACCTT  
CTCAGTATGCATTTTCACAAAAAGCAAGGATTGGAAAAAAAACCTAAAGCGACAGTGTT  
ACAATTCA

>novel\_circ\_000578

GAATAATGCACATAAAGAGGGAAGAGACCAATGGCGTTGAAGAGCGGCCTCGAAGGA  
AGGGTTCTCACAGGGCCACGTCGCAGGTCAGGTCTTTTGCCTCCCTCCTACAGTAAT  
CCATCACATGGCGTGCAAATATGGCTAGTGAAGTAGCCATTGTTATGATACATTTGTTTA  
AATTATTTGGAAAACGTAAGAGAAATCATGTTTGCTCATAAATTATTGTCAGGCTATTGA  
CGCTACTCGAATTATTGAAAACACAGACCAGGTTACCCGACCGATTCATAAGCCTGTCC  
TTAACATTTGCATTAACAATATATTTAATTAATACCAGGTTTATAATTATTTTTTCATTCGC  
TATTCAATAAAATGAAAAATATGCATAATACTAATTTTTATTCTAAAAATGTAATATTATAA  
TTCGTTACTTTGTATGCACAAATCCGTCCTGTAAATTTCAATCATGTCAATTTTAAAATT  
ATAAATATACATATATAATTGTTAAGTGTGAAAATTGTGTGAAAATATTTAATATCTGAA  
AATGTTTATTACAAATTTAAAAATAAATTTATTATAAATTAATGAACTATAATTGTAAATAT  
GTTGAAAGTCAATTCCTAACATGTTAAAAATAAATGTAAATAATTTTTATATGAAATAAC  
ATATAAAAAATTAATAAATAAATGAAAAATTATTTTCATACAATAAAATATAATTATAACA  
AAATATTGAAAGAATATTATTATGTACGAATGCATGAATGAGTAAAGAATGAGAGGTGC  
AATTATTCTATCTGTTTGTAGAGAAACAAAATAAAAAAAGCTAGAAATCAATTGAAGA  
AATAACTTTGTAATGATAAGGCGAATTTTGTATATTCTTCTTTATATTTTTTATTAAATTTT  
ATTCATCCAAATTTTGATTATTAGAATTATCCGTATTATTATTGTGTAAGTTAATTTTTT  
TTTCAAAATAAAATTTATTATCAAAAATAATTTGTGCGGAAAATAATTTTTGAATTATTATT  
ATTATTATTCTTGAATAATAATAATTTATAATAAAGTGAGACAGATATGTAAATATTTTTTT

TAAATACATTGTGTAAATTTTATAAGATGCGAAAGAAATCGTAGAAATAGTGTTTATAAC  
ATTTAAATAATTGAATGCTATTAAATAATTAGATTTCAATAATTTCTTTTGCATGTGTAA  
AAATAATAATAATACAAAAATCAAATGTGAATAATATAAAAAGAAAAATTTATTAATTC  
AATTTAATTTTATAAATAAAAAGATAGAAATGTGTAAAGTAGAAGTTAAAAAATAATATAT  
AAATAATAGTATTATTGAATTAAGAGATAGAAAGATTTTATCTTTAGTTTTGACTTATTTT  
TTAAATTTCAAATTTTGGTTTATATAAAAAAATTATTTTTTATTAATAATAAATGATTTAA  
TATTAGTTTATTATTATTTTAATTGTAATTTAGTTTATTATTGTTTGGTAAAAAAGAATTGT  
TTATTATTATCTTTCCCAAAGAAAGGATAAGCTTGAATATGCATTTTATATAAAATCAAA  
ATGTATACTAAATCATTTATTTTTAATTGATATTTAACTTACATAGTATACACAACATGGT  
GTAAATTTTGTAAATACGTGATTTAAAAAATTATAAAAAATGATTTTAAAAATAAT  
CTTTAATTGATAATAAAATTACATAGTTTTTTTTATATAATTCAAACTATATTAGCAAAATA  
TTATTTAAAAATGTTATTGAAAATTTTTTATCAATTATTATTATTTTTTCGTATTATTATTA  
TGATCAATATATTATCACTCATTTGTTATTATTATAATTTATTTTTATGTAAAAAATAACGA  
ACATAATTTTGAACAAAAAATTTTTTTTTATTCTTCTTACTTTATATTTTTACTTTCTTTTC  
ATTTCTCTTTATTGTTGTCTTAAGTTATCAATTTTTAAATATAATTTTTTATATATATTCTCA  
TAATCTTTTTGATATATAATTATATAATAAAATGTATGTTATGTAATTTTATGATCAATTAAA  
TAATTTTGTGTTTATCAAAAAGTATTTAATTTAATATTTATTAAAAAATTAGATGTTGATTT  
AATATTTAGATGTTTCGGATTTGTAGTTTGTTACATACATTGAGATTTTGTATAAGATATAT  
TGCATTAAGATATAATACATTATCTATATACATATTTATATATATATATATATATATATATA  
TATATATATATATATATATATATATATATATATATATATGAGCAGTAAATATTATGTAATGCAGAAT  
TTAATTTTATTTAATTAATTAAGTGTAAGAGTCTAAAATATTGATTTTGATAAGTATATAA  
TAATAAATAGATTTACTAATTTAATAATATTAAATGAATAATTCTTTCAAATAATATCATTT  
ATGGAAATATTTCAGTTTTCTAATTTATTCATATAATTTCTTGAATTCTCGTCTACAA  
TAAAATGTTAGACAATGAAATGAATGAACCTTTCACAAATAAATTTTATAAATTTCAAATT  
ATCTATTTATTTTATTTAACATTACCTAAATTATAAATACTTTTTTAAAATGATAGTTGATAGT  
AACATTTATAAGATTTTTTATAAGATTTTATAAGATTTTTTTTTTGTAGATTTTAATAAGATTT  
ATAATTAATAAATTATAAATATATTTATAGTAATTTATACCATTTTTTACAAAAATCATAAG  
ATTTAAAATTAATAAATTGATGAAAGGAATATAGTTATCAACGAAATAATATATTGATAAT  
TTTATTTTAAATATCTGAGACAAAAAGTCATAAGATTTTTTTTTTAAACATTATTTATTTTGC  
AAAAAATATAGAAATAGTCGTTGAATTCTACCAATACGGAAGATGTAGATTTCTATCAA  
AATCTATGGAAATAATTTCTTTATGAATTAATATATCATATTTGACTCTAGAGAAATAAAA  
ATAATATTTATCGCATTTTCGAGATCATGAAAAAGAAAAAAAATTATGTTTCCTAGTTTA  
TAAGAATTTTCCTACCGATTTTTAATTAATTCTAAGGAATTTAATAGAGTTAAAAAATTTA  
AGTTGGGAAATATAGAGCATTTCAAGTGAATGATATAATAATTTGATATGATATAATATGA  
TTATATGATAATTTATCAAAATTCATTTATGATGTGATATATTTTCTTAACAATAATAAATT  
ATATTTCAAGTATGTCATTTATACGAGACTTAGATTTCTCATATTCAATAATCAGAGTAGA  
TGC GTAATTACAAAGAAAAC TATTTATTTATCATATTCCATCAGAATACAATATGTTCCACA  
ACAAAAATTAAATAGAGTTAAAAATTA ACTCTGCAGATTCATTTTTTGTATGAGACTCTC  
AGAAATTCCTTCCATAATTGGCATCCTAACTTGCAGTATTTTCAAGTAAGAGAGAAATT  
CCTTAAATTAAGCATAAAAAATATGATGATAACCAGAGATTGATCAGCATATATTTATTAT  
AAATTTCTCCGAATATAGTTAATTGCAGTTGAATCAATCATATTTAGAGAATATCATCCTT  
AAGATCGTGTTCCTAGCCAAGCTAAAATATGTTAAATATATAGAATTGTGTTACCTAAAT  
CTTCCTTTAAAGTACCAATCTTCTCAGATAACATCATTCTTTATTTAACTTAGTAAGAGA  
ATAGCAAATAACAGTACATGTAATGAAAAAAGTTTTATGTGAGGAAGAAATAAGAAGA



ATACTTATTGCTTACGAATGAATATATATATTATTACTAATAAAATAAAATAAAATAAAATAT  
ATATATATATATATATATATATTACTTAATAACTCTTGATTAATACATCTTAATAATTTTCGTT  
TGATTTTTTTTTTTATCAGATTCATCATAGTGAATCAAAGATAAAAATATTTTTCTAATTTA  
TATAATTTAAACAAAAATAAAAGTGATAACACGCATCAAATTTTGTTTATTATCGAATT  
AACATATTTACAACCTTTCAACAAACAACAAAATTGTACCGTATCCATTTCAAATATTAT  
TTCAGTGTCTCTCAATAAAATAATTTCAAATATATAGTTTGTTAGAAAAGTGATAGTAGATT  
TTTTTAAACTCCAATGTTCTTTTGTTGAGAATATTAATGAAATACGTTTGCAGTTGATTAT  
TAATAAAGATTTGAATAAGATATTTCAAATAACTTTTCTATTGTGTATTGTTTCAGTTATT  
TTTGAAATATCAAAAACCTTTTTTTTAGAAAAAACTTTAAAAAAAATACTATAATAATATT  
AGAATTCTATAATAATACTATAATAATAAGAATACTATTAAAAAAAAGTAATTCTTTTTT  
AATATTTTTATCAATTACTTATGAATTTGTTTGTTTTTTTTTTCAAATCAAAAACATAATA  
AGTGAAAAAGTGACTTATATTGTATTTGAATATTTAAGCACAATATTATACAATAAATTC  
TTATTCATATATGTTAAAAATGGAATAATTTTAAAATAGTATATTGCCATAAAAAAATGTT  
ATAGTATTAAGATTTAATTTTATTAGAAAAAATAATATTATATTATATACTTAGAAAAAAT  
TAATCTATCAAAAATATTTTTTCATTTATTTATCTTTTAAATTTAATACAATATAACTTATGAT  
TAGATAAGGCAACGAAATAAATATCTATTTTATTCTACCTGTGTCATTATTTTATAACGTC  
CATTTTTTCCATTGCTCGCGATGTTTATAAACAGCTTATTCAAAGATTTCTCATAAAAAATC  
TTTTCTGTTATAAACGCAGACTTCTATTAAGTCTAAAAAACACTCACAATCTAAAAACA  
CAAAGGATGATATTATTTGAGAAAACTGTCGTTTTTGAGACTTTAGTCGACAATTGTATA  
TTTTTGATACACTTCAGCCTGATTGGAGCACAGCCCTATCCTAAGAGTGACATATTCCA  
AATTGATTTCCAGCTGATTCAACAGCAATCAATATCATTCTAGTTCGAGGAATTTTTCTC  
AAATTTGGGGAGTCACTGATCGCAATGTTATTGTTTATTACCGTGCTCTACCGAAAAAC  
TGAAATCTTTCGAATTAACTAGGAAGGAATTTTTTGAGGACACTTATAATTTTTTGAGT  
GTTACTTATAAATAGAAGTTCAGGATGAACACGCTAGATATAATAATTAGTTTGTGAATA  
TATCATGCTCTGATCGTCGAATTATTTATTGTTATTTGTAAAAAAAATCTCATTGTGA  
ATAGATAGTAGTCTGATCAATACTTACATTAATTACATAGTTTAGTTCTAATATCATATCGT  
GGTCTGATACGATTATCTGCTGCGACATTGTGAGAGATCCTGTTTTTTTATATAGATACG  
CTATAGATGCGCCATGTAACCATTTTTTACAGTTCATTCATCTTTTAGAAATATATCAATTAT  
TATGACATGTGTCAAAAAACATTTTACAAACACTCAGGTATTAGTTTATATCCATCATCA  
TTACACAATAATATTGTTACGGGTGTGAACATGTATAAAAAGAAATTTAAAAAATATTG  
AAAGTATTGAAAAAGTAATAATTTTTTAAATAATGTTTTTTGAAATTGATATGAGACTA  
AAATATGTAGCTATGAATAAAAAGCACATGAATCAATTGTCAAAGAAAATACGAAATT  
GTTGTATAGAAAGCAAGTGAAATTTATAGTGAAAAAGAAAAAGACAGAAATTCTAGAC  
AAATTTACGTAATGAGATTTTTATTATAATTTCCCATTTTTTTGTTCTAATATATAAGATT  
TAATATAAGATTTAAGATTATAAAATTTAATATAAAATTTATGAAAAATTTTTTATTGCCT  
GTAATAGAAAATTATTGTAATGAATTATTGGAACCTCTAAATATGCAATATATTTAATAAA  
ATAAAAAATTTAATAAAAATTAACAGTAAATATTTTTCTATATTACGAAAAAATGGATAT  
TTTATATAGATATATATATAAAATTTAGCAATATTGCATTATATTTAAGAAACATTGACAAT  
CAAGGTATATATTTTATTAGTGTAGCATTTTGTAGCGGATTATATATGTATGTATTGCGATG  
GTAATTTATTTACACATATTTAAATGTATATTTATAATTAATATTAATATATATATATTAATA  
TTATATAATATATAAATTATTATATAATATATTTCTGTTAATATTGGCTAGTTGATAATAATAG  
ATCAAATGAACAATGTTGTTTTTCATTTGTTGTTTTATTATTTTATATATAAATAATATAATT  
GTTTTTTAAATATTTCGATATAAGTTATAATATATTTGAAAATTTAAAACAGTTATAATACT  
AATATATGATAATCTACGAAGCTTCTTTTTTTTTTTTCATTGTAATATTAAGTATAGATAT

GCATTTTCTTAAAATGTATTGAATATGATTTATCATTATGACTCTTAATATAATATTAATTAA  
TTTCTTAGTATTAGTATATTAAATTATGTAACCAAGAAAGATCTGTCATAAAAAACAATT  
GAAGATTAGATACCAAAAATCTTTTAAATACATTAATATACATTAATAGAAAGTTTATGTA  
ATATTATAGACTTCTTTCAAGAATGTAGAATATAAAATTCTTCTTTTATTAATGAATAAAA  
AATTACATTATTAATAATATTAAAGGATAGTAGAAATAAAAAAATTTAATTAATTCATTATA  
CATAGAATGTTAATTCTACTATATAATTATCTGCAGTATTAATATTTTCGTAGAAATATTTGA  
AAAGAATAAAAAACAAAGAGTTTTATTTTATATTCAAAAATAATAATCATTAAATTATTAC  
TTATAATATTATTCTTTTTTATTAATTATTATTTTTCATTGAAAGCATGAGCATTAAAGAAAA  
TTATTTTAAATAAGATATTTTCTTTTATATTCTTCAATTTTCTTTTATCATATTATATAAAT  
AAATGTAATAATATATATTATATAAATATAATAAAATTTTTTTAATAATTTATAAAATTATTA  
AAATTTATTATATTATCTATTATACAATTATTAATTTATTTATTATATATTTATTATATAAAATT  
AATTAAAAAATTAATAATTTATTAATATTTATAAATATGTATATTTAATATTAGAAATAAAAA  
AGAGGAAAAATATAAAATATATAAAAAAGAAAAAATTTTGATTAACGAAATATAATTGCA  
CGATCGAACAAAGAAAAAAATTAATCTTTAATTAAGAGCAAAAATTTTTCAGGGATATA  
ATAGCGGTTTTTCCAATATGATTGCACATGAGAAAATAACCTTTTGCATGTTTTTAACGG  
TTTCATTAAAAATCTATGCAAATATGAATCCTATAAAAAAAGTTCTTAATTCCCCTCTAC  
GTACATGAAAACTCGATCAACAGTTTATGTGTTTTATTTTTTTTATCTTATTTTTTGTGTGT  
TGTTGTTATTTCTGCAATTAAAGAAGTTCCAACAAATAATTGGCATAATTCTTCATAAAT  
GAAGAATTTTTAATTTTTTAATATCTCTTTATACTGACTTATGTTAATCATGTAAAATTTGA  
TATTGGTGAAATAATAAAATTTTATTATTACAATACATAAATAAATTTTGTATATCGTATGA  
TTATATATCAATATTTTGCATCAACTGATTTAATAAAATAATTAATATTAGAAATATAATTA  
AATATTAAAAAATTTTATAAGCTTTAATCAATTCTTAATATCAAACATTTTTCATACGAAT  
TTATTGAATTTTCTTCAATATATAATGAATTTCAACTATTTCAATACTAATCATATTTCAAT  
AAAATGCAAGAAATATATAATGATAGGAATACAAATTTTATCCTAATAATATATTGTTAAA  
ATTATCATTTCTAAATTATTAGATATCCAAAATTATATCCTTAATTACCCTTAATTTTAATG  
AAGAATTAATAAAATATTAATATTTAATTAATATTTACTTTGGAATTAATATGCAATATTT  
ATTTACATTATTTACATTACATTTGTATATATAGTTTTAAATTTATATAGTTATTTATTATACG  
AAAGAAAGAAATACAATATTCTTTAATTTTTATCGAAATAATATAAAAAACTTTAAAAA  
TAAATGTTTTTTTTTAATTTTTTATTCTACAAATAAATACAAAATTAATATATATATCAAAG  
ATTATTTTAACATTTAGTTAATGAAAATAAATAAAATAAATTTATTCTAAAATTTTATACGT  
TTTGTTGTTTTTAATACAAATTTATCTATTATTTTACAAATAATTTTTATATAAAATTTTTT  
ATATAAGAAAAGTATAAATATAAATATTATCGAACTGATAGTAGAGAATAAATTTGCATA  
AAAAACAAGTTGAAAATGTAAAATATTTTTTTGTACAAAGTTTCATTTCTTATAAATAT  
ATCAAGTATTTATAGATTTATATTTATAATATAATAATCTTAATAATAAGCAACATAATATTT  
TTAAACGATTTATATTTATAATTTTATGTACATTTTCATTGTATCATGATTAAAAAATAAAT  
TTAGTAATTTAACTTACGTTAACGAAATGAATTAACCTAATTTTCATAATAGGATAA  
CTATATAATAAAATCTTGAATTTTTATTTATTCCTTTTATTATATTATTCTTTGTCAATTCCT  
TTATTATTTATTATTATTTATGTAAGTATTCTTAATAAAAAAGAATATTGATTATTGAAAA  
TAATTATTAAATAATGTAATTATTGTAAAAATTTAATAAAGTATGATTTTAGATTTCATAA  
AAAGATTTAGATTTCTTAATTGAACATAAGGATTGAAAATTATATTTATATTATAAACTTT  
GAATGAATTTAATGGTGATTAATTCTATCTATTTTTGTAGCTGATTAATGATTGATTGAAT  
TCCATGAATTAATTGTTTTTGACTCCTGCGGCGATTAATTGCTATTTGATTAATTTCCACG  
TTTCTAAATGATATCTAATAAATTCGTATTTCTGGAAAACCTGTTATGAATTTTTAATTATT  
TTTCCAGTAATTATTTTCGATGAAAATATAATTATATAAACTATATAAACTATATAAACTAT

ATATATAAACTATATATATAAGAAAAGATAAAAAAGAAAACCAATAAGGGAAATTTT  
AAAATAAATCTTTGAGATCTCAATGTATAAGAATAAAGATTTTGCACCTTTGCAGGA  
CTTTTATTTTTTGAGTAATTGGACAAAATATTTGGGATGCAATATGATTTATGAAATAGC  
TATCGCTAATGTATCGAATAATTGTTATTGAGAATTTAGAACAATGTAACGAAATTGTAC  
TACTCATAAATTACTGTTAAAATCTAACTGCTAAAAATCTAACTACTGAGAATGTTG  
AAATCGCTTCATAATTTTCAGTCTTGGTTTTTAATAGGAAAAAAGATCCTTAATAAAAA  
ATAATCGAAAAGCTTGCTAATTAACCGAGATAAAAAATATTATTATATCGTGAATTATATTC  
AGTAATAAAATAATTACATGAAAGAAAATTGCGCAATAAAAAAATTTATTTGAAATTGTT  
ATATAGCCTTAGTTCAAATCCAATATGTAATTCATTCATTGAAATTTATAATATTCGAATTA  
AACATCAAATTTATTTTTTACAAAAATTCTATTTAATATAAAATCTTAAAAAATAAATTC  
AAATCTATTTTACTAATTTTGAATATTAATTTTAAATATTCTTTTCAAATATTTATATACTTG  
TATCCTTTGATCTATAACATAATTGACGACTATATTTACTTTAAATTTCAATGAAAAATAG  
AAAAATAATGAAATAAATTAATTTAATTTAATTTTCATTTTAAAATATTTTCATAAATATAT  
ATGTATACACATGTACATATATAAAATAAATAATTTATATATAATTTTTTCATACGAATAA  
TGTTTAGCATTATAATTATATATTTCAATTAATATATTTATTATTATATTTCAATCGAATATTA  
TTTGACGAAGAAAGCAACATGATCTTTTTTTAATTGTTTTCTACTGATAAATCGAATTTG  
AAAAGTCGAATATTTCCAGTTTTTCTTCTAATTATCTAAAAAAAAGAATTGGAAATTG  
GGAAAAAGTTTATATGATCTAATTTTATTTTAAATAGCATAAATTTTACTTTGTTGTTTCTA  
TTTTTAACTTTTCTCAACAGAATACAAGGATTCTCTGTGCACGTTTCGTAAAAACTTAC  
GAATATTACATAATTTGTTAATTCATCTGTTTCATTAATCGTCATCGCGTGCAAAAAA  
GTTTTTTAAGTATGCATTTTTTTCATCTGAATTTCTCTTTTATTTAAATTTATTTTTTCTTTCA  
TTATTAATACTGTATTTTTTTTAAAGAGAGAAAATGAAATGAAAAATTATAACATATTTAAA  
GTAATATTAATAAAGAAATATAATAAGGAAATTAAAGATATATGTATATGTGATCATTCAA  
AAAAATATAAATAGTTTACATTTTTTCATTTCTAGAAATAAAAAATCAAATTTGAAAATTTG  
TATAAAATAATGTAATAAACTATAATATATATATTATATATATGTTATTTAAAATTATTTATTT  
TAATTTAATAATAATTTTAAATTAATAATTATTTATTTTTTATTTTTTTCAAATCTATGAAATA  
TTTTAAAAATTAATAAATTAATTTTAAATTTTCCTTTAATTCTATTATGATCTTTGAATTT  
TTATATCTTTTTGTGTTTGATTTATATTTTAACTTAGTTTTAAAAAATTTATTAACG  
ATAAAAAATCATAATTGATAAAGCTAAAATATTTCATAAATTAAGTCAATAAAATTAA  
CTGTAAATCACTATTTAAAAATAATGTATAAAAAAATAAAATTAAATAACATTTTAAAAA  
AATTTCTCAAAAAACAAAAATACTTTTTTTTTCTCCTTTTTTCACTGTAAACAAAGAA  
ATATTTAACAATCTTGCGATAATTAAAAAACGCAATAAATCAATAAATTATGTATATTTT  
TTATTATTTATATATAATATATATTTGTATACAACTTATACAAAGTTTGTGAATTAAATTAACA  
TTAACTGATCAAACACGTCGAATAATGCTCGAATAATTTGTTTAAAAAAAACGTTATAA  
TAGTAAATAAATTTGATTTTTCCATAGATAAAAAAATTTTGATTTTTATGTTCTTGAGCT  
TTAGTTAGGAAGTTTACAGATTTAATTATTTATATATAGCGAAACAAAATTTTAGAATAT  
TAATACGTAGTGTTCATATATTGAATTACTTTTGTAGATCATTATTATTAATAATTATAAAT  
TAATTATAATTATTAATTTGTTTTTTATTAATTCGGATTTGTTAGTTTGAAAAAATTTTG  
AATTGTTAATCGCTTTTTTCATTATAATAAAATATTGCTTTTTAACTGATGTATCTTACAATT  
ATATAAAAATTTACTACTAACATAAATATTATTATATATATTCATATTATATATAAGAATATT  
TATAATAATAATTATTATAAATAATATTAAGAAAAGCATCTTATGAACAAATTGATTATTGT  
AACAATGAAAGATATTATATTTAATATATATCTAATATCATAAATATTTGTTTACTATTAAAA  
TTTAAGAAATAAAATAAATACTTAAGAAATAAAATAAAATTTAATAAAAAATCTAACTACA  
TATTAACAATAACTATATTATTAACAATATATTGTTAATTTTAAAAAGATTTACAAGTAATC

TAATAAATTGAGAAATTTAATTGAATATAATTAAGTTACAGAATGATTGCTAAATTGAATT  
TATGATGAATTTTGCTTTTTTTTATTTATTTTGAAGCAAAAAACATTGTCTATTTGATAT  
TTGTTCAATAAAATTAGTTGTTTGTTAAATAACAAATGAGAATGAGATTTAATATGTAAT  
CTTCCAAATAAAAACGACAATTAGAATATTCTTTTGTAATAAAAGAAAGTTAAAGATTG  
AAAAATTTTATTCGCTCAAGATATAGTATTTAATAAATAATCTTCAAACAAATTGTCTTT  
AAATTATTATGAAAAATCTATTGTTTTTAATTATTGTATATATAAAAAATTTAATAAAACCAA  
ATAATATCCAATAATTGAACATTTTAAAACAAAAATTTTTTTATCGAGAAATATCGTAATT  
AATGTAATTAATTTTTTTGATATAAAATCTTTTTTTTTTAAATACTATGAACTATGTATTTAA  
AAAAAAGTGAATCGAATAGTGTTGATATTCATTTCATCTATTGATTATTTTATTTAACATA  
ACATACGAAAAAAATTATCTTTGTATTAGAGAATCGTAATGATCTGTACAAATAAATAAG  
TGGCAAGGATTTAATCTGATAATTAAATTTTTTTTTTAAATCAGAGTCGTTATAATCGTAGAA  
TTGAAAATGAATGAATATGAATTAATTTCAATAATTGAATTGGTGTTAATTCCATATAAGT  
ATGAAAATATACGATATAACTTTTATAGATATAATTTTTATCTACAAATGAGTTTAATAATA  
AAAATATCTAATTAACAATTCATTTTTATATAATAAATAATAAATAAATAAGTAATCATATCA  
TAATTATTTTTCTTCAACAGTTTAATAATATTTTCATTATTTTAGTATGAAAGTAATTAATT  
AATATAAAATTAATAATATTTCAATTGTTTTAATTTTTAATTAGATAAATAATTATATTTTAA  
CAATTTCAAATTATTAATAATCTATATTTTATTTTATAATATTTACTAATATTTACTAATATTT  
AATATTTCAAATAATTATATTTTTAGCAATTTAATTAGTTTATATTTTAATTAGTTTAAAAATA  
ATTAAAATAATATAAATAATATAAATATTAATATAAATATAAATAAAATAAATATTATTTTAA  
AATATTATTTTAATTTTTTAAATATTATATATTACATTAATAATATATAAAATAATATTAATATT  
AAAATAATATTAAATTAATATTATTATACACAATAAATATTACATTAATAATTTTTTAAATTA  
TTTTAAATTAATTTATATTTTTATTTTATTTTATTTTATTTACTATTTAGTATTTATACTATTAT  
TAATTATTATTATTATTATTATTATTATTAAAGCTTTATTTTGTAATATTTTAATTATATTA  
AGATTTGATTTAAGATGTTGTAAAAAATAAAATAATAGAATAAGATCTAATATAATACAAT  
ATAATATAATACAATACAATATAATATAAAGAAATATTGAAAATTATATTTTTTAAAA  
ATAAAATTAAGATATAATAAAAAAGATAAATGTAAATGGAAGAAATTAAATTTAATTCTA  
AAAACATCAAATGCAGACATAAGAAAGTAAAACCTATACTATTTATATGTGTAAAAATAA  
ATTATATTACAGAAAAATCATTTTCAATTTTCATGAATTGGAAAATTTATTTTTTAAAAAT  
TTATATAATATCTATATTTTATGAAAGCAGGTCAAACAGAAAAATATCTTTTTGTCACAAA  
TTAATCATTTTCCTTGTAGTATTGCAAATTGTTACATTATACTATAAACAATTTTATTTTC  
TTTTTCACTCTCTTTTGCTGCTAAAGTAAATTTAAATTGCTTACAAATAAATCTTAATCGA  
CGTTTTTACATACCACTAATATTTTTTCTTAATCTTTATCATTGATATCTCTGAATATATTAA  
CACTCTATACTCTTAAAATATATTAAATTTGATAAAGTCAATTAATGAAGTTCATAACTA  
AACTTTATCAATATATTATTTTATGAATAAAGAAATAAACTTATATAAAATATTATTAATATT  
TTATTTATTTATTTTTATATTAATGTTATTATAATAATTATAATAAAAAATTTTAGTCATTTTTT  
AATATTCATTTTATGTTATTTATATTATTATTATTATTATTACTTTACATTACGTGCATAT  
TTTATAAGATATAATTTTATAAATTATTCATTAATAACTTTTACTAAATTCCTAATATTTAT  
TATAAATTTATTTTCTTTTTATTTTTTGATATAATTAAAAATATATTTAAACTTTAAATTCT  
TAAATGATTAACCTGAAAATTTTAAAATATATATATATATATGCTATATCATACATTTAATCAA  
TTTATAAATTTTTACAAGTATGCAATATTGGTTATTTATATTATGTTTAAATGAAGCAATTA  
GGAAATTTGTTTTTTTTTAAATTTTTTGTATTAGATTAAAAAATATTTTTAAAGGAAATT  
AAAATTTTATTATTCGTCTTAATTAAAAAAGAAATATATTTTCATTTGAAAGAAAAGAAA  
AAAAATATTTTCAAATCATTGAAGAAAACCTGAGTAGAATTAATTTTTATAGAAAAAATTT  
AAATACTAAATTGAATCTGAATTTGCTACTTTATAAGTTTACAAAAAATTGAAAATCAA

AAAATAATTTATTTAATTCACAATTTTATTTTACAAATTTTTTTTCAGGAAATTTATCAATA  
ATAATAGTCATATTTCTACTTTTCGTTTCTATGTTTTAATATAAGATTGATTTTATATATAATA  
AAATTGTTAAGGACAAAGCTTGTGAAATCCGGTAATCTGGCTTTCATTTTCAACAGCTA  
GAATATCTCCAAAAATCTAAACAATAATTTATGAGGATTATATATATATTATAGTTTCTTAA  
TATTTTCTAAATTTTCAATTTAATAAAAAATATTACAGCAATGGTCAACATTTTCATCACAC  
AAACTGTACTTGTACGCATTGCGATGGATCACCATGAAAGCGAGCATAAAAGTCCTGAT  
TCCCATGTGCTGTGACGCGAAGGCCCATCCTTCGTCCTCCAACGCAATGATTGGACCTT  
CTCA

>novel\_circ\_000579

AGATCAAGATAATGACAGTCATGGTGGAGAATGTGAAAGTTGAAGAGGGCGAACGTC  
CGAAGATCGAAACCTTTGATGATATCCTACCTTACGTTGGCGAAGCAGGCCGTTATCAA  
TGGTTTCTCTTTATTGTCTTTTGCCTTTCACCTTTGTGTACGCGTTTCTTTATTTACGC  
AATTCTTCATCACATTACTACCAAACGAACATTGGTGCACCGTGCCAGAACTCGAACGA  
TGGAACCTCACGGACGAAGAAAAAATTGCAATATCGATACCCACAGCATCGACAGAAG  
AGTTAAAGCAGGAAGGCGCAACTTCCTTTTCGCGATGCAATATGTATAATGTGAATTAT  
ACTGAAATAATAGAAAAAGGTATTAGAAAAGCAGATCCATCTTGGCCAATCAAATCTTG  
TCAAATGGTTGGACGTTCAATCATACGATGATTCCATATAGATCTATTGCTGTTGAGCT  
GGAATGGGTCTGTGACCACGCATTCCTTAGCTCGGCGGCACAATCGGCCTTCTTCGTG  
GGAAGCATGCTTGGAGGTTTAATATTTGGTTACATAGCTGACCATTATGGCAGAATTCCG  
GCGTTGGTCGCTTGCAACGCGGTTCGTTTCATCGCCTCTGTTGGCACTGCGTTTTGTGA  
CAGTTTCTGGAGCTTCTGCCTCGCAAGATTAGTCGTTGGATCATCATTTGATAATTGCTT  
CAATGTACTTTTTATTATCGTGATAGAGTATGTCGGCCCGAAATATCGAACTCTTGTGGC  
AAATATGTCTTTTGGGCTTTATTTTCGCGGCAGCTGCGAGTCTTTTACCTTGGATCGCCTA  
TTGGATCTCAAATTGGAGAATTTTAAGTATGGTCACCGCGTGTCCCATGGTGGTCGCAT  
TTATAGGACCATGGATTGTTCCCTGAAAGTGCACGGTGGTATATAACCAAGTGGAAGAATT  
GACAAAGCGATCGAGATGCTAAAGAAATTTGCGAAAGTGAATGGCAAGGAAGTAAAA  
CAAGAAATATTCGATGAATTCGAAAAAAGTTGCAGAATGTCGAACGAAAAGGATCAAT  
CGCATAATCAATATACCGTCCTGCATCTCTTTAAACTGCCGCGACTCAGTCGTATTACTA  
TCATGCTCATTGTTTATTGGCTGCTAATGGTGTGGGTGTTTCGATGGTCACGTTTGAACA  
TGAAACTTCTAGATCCTGACGTTTTTCATGTCCTTCTCTTTGGCTTCCCTCACGGAACCTC  
CGGCGGCTGTACTACTTGCCCTTTTTCTCGATAGATGGGGCAGACGATGGATGGGTTTT  
GCATCAATGTTCCCTCTGTGGCGTTTTCTCCTTTGTTGCCCTTCTACCCCTGCTGGCTCA  
CCAACGGTCGCTATGGCAATCATAGCACGTCTTGGAGTGAATGTCGCGGCAAATATTGG  
TTTCCAATATGCAGCTGAAATGCTGCCTACTGTAGTGCAGAGCCCAGGGTGTTCCTTTGA  
TTCATATTATCGGTTATGTCGCTCATATTTTAGGACCGTATATTATTTATCTGGCTGACATC  
GATGCTGCTTTACCCCTCATTGCTCTTGGTTTGCTATCCTTTATACACTATTTCTGACCC  
TTGGCTTGCCGGAACCTCTGAATCAGGAACCTCCAGAAACCCTTCAGGAAGGTAACGA  
TTTTTGAAAAGAACAAAGCTTCTGGTGGATTCCCTGTATATCCTC

>novel\_circ\_000582

ATTATTTACAATAGCGCCAAACGCGATATATCGATGATATTGAATAAGAAATTATTTCAAC  
AAAATGTTGATCAAGAAACATCGAAGACGGAAAAAAGAAAAATAAGCAAAAAAAATTAA  
TCCAGGAATTATCGAATTCGAGCTGAAATATAAATGGAATATCGTTTGGAAAAACGTG

ATTGTATTTATCTACCTTCATCTTGGAGGTATATACGGATTTTATCTTTGGATTAACGGAA  
CGAAGGCATATACAATTTTGTGGTCAATTTTCGTAGAATTTTGGCATTATGGGCATTA  
CAGCTGGAGCTCACAGATTATGGTCACATAGAAGTTATAAAGCGAAATGGCCCTTACGC  
TTCGTGTTGATGCTTCTTCAAACAACCTCTTACCAGAATCACATTTATGAATGGGTAAG  
AGATCATAGAGCTCATCACAATTCACTGATACTGATGCGGATCCTCATAATTCCCGACG  
AGGATTTTTTTTCTCTCACATAGGCTGGTTAATGGTCCGAAAGCATCCGGATATATTTAC  
AAAAGGTGCCACTATTGACTTAAGTGATTTGGAAAAAGATCCCATTGTCTGTTTGGCAA  
AGAAGATTGTATATCGTGCTGATGCCTCTTTTGTGCTTTGTAATTCCTACATGGGTACCC  
TATTATTTTGGAAATGAAAAATTTATATATTCCTGGTACAGCAATTTAGCAAGATATGTTT  
TTTCCTTAAACGTAACATGGATGGTAAACTCTGCTGCTCATATATGGGGCATGAAACCAT  
ATGACATGAACATTTGTCCAGTAGAAAACAAAATTGTATCTATATTTGCATACGGCGAG  
GGATGGCATAATTATCATCATGTATTTCCGTGGGACTATAAACTAGTGAATTTGGTACC  
TATAATACCAATTTACTACCGCATTCAATTGATTTCTGTGCTCGATTAGGATTGGCATACG  
ATTTGAAGACTGTTTCCAATGAAATAATTAGAAAACGAGCAGCTAGAACTGGAGACGG  
ATCGAG

>novel\_circ\_000583

ATTATTTACAATAGCGCCAAACGCGATATATCGATGATATTGAATAAGAAATTATTTCAAC  
AAAATGTTGATCAAGAAACATCGAAGACGGAAAAAGAAAATAAGCAAAAAAATTAA  
TCCAGGAATTATCGAATTCCGAGCTGAAATATAAATGGAATATCGTTTGGAAAAACGTG  
ATTGTATTTATCTACCTTCATCTTGGAGGTATATACGGATTTTATCTTTGGATTAACGGAA  
CGAAGGCATATACAATTTTGTGGTCAATTTTCGTAGAATTTTGGCATTATGGGCATTA  
CAGCTGGAGCTCACAGATTATGGTCACATAGAAGTTATAAAGCGAAATGGCCCTTACGC  
TTCGTGTTGATGCTTCTTCAAACAACCTCTTACCAGAATCACATTTATGAATGGGTAAG  
AGATCATAGAGCTCATCACAATTCACTGATACTGATGCGGATCCTCATAATTCCCGACG  
AGGATTTTTTTTCTCTCACATAGGCTGGTTAATGGTCCGAAAGCATCCGGATATATTTAC  
AAAAGGTGCCACTATTGACTTAAGTGATTTGGAAAAAGATCCCATTGTCTGTTTGGCAA  
AGAAGATTGTATATCGTGCTGATGCCTCTTTTGTGCTTTGTAATTCCTACATGGGTACCC  
TATTATTTTGGAAATGAAAAATTTATATATTCCTGGTACAGCAATTTAGCAAGATATGTTT  
TTTCCTTAAACGTAACATGGATGGTAAACTCTGCTGCTCATATATGGGGCATGAAACCAT  
ATGACAT

>novel\_circ\_000584

GTCAAATTTGACTTTTAATTGAATTATCGATAGCGCATGCGCTCTGAATGGCGGCAAAG  
GCATCAAAACGTACTTCTGGGGGCGCTGGATATTGTGTAGCGTCGTCTTCAACGAAAA  
CGCAGCTACAACGTGGAAGTGGTCTTCTTTGTTTACCTGCAGTTTATGCTTTATTTTAA  
GTTTAATCTGCACATGCTTAGCTACGTTATTGGTTCTTTTCGATCAAAAAGTTGAAGCCG  
CCAGCTATCAATATT

>novel\_circ\_000585

ATTGTCCAGCAGCACGACGGCTATCGGTACTGCAGCCACCGGTGGCGGTGGCGGAGC  
GAGTAGCGGTGCGAGTGGCGGAGGTGGCGGTGGCAGTGGGGGCGGAGGTGGCGGGG  
CAGCCGGCAACGGGACTTCCGGCGGTGATTTCTTACGCAGAAAGTCACCCCTCTCGGA  
GCATACGGCCCTGCATCCCGCCTACCGGCTCAACTACATGGACCACCTTTACCACCAGC

TTCAGGCCTCCACGCACAGTCCCAACGCCTCGTTACACGGACTGGGTGGTTTGGGGCC  
CGAGTACCTTTTGCACGCCGCAGGACCAGCGAGCACCCTCGCTTCTTCAGAATTCCCC  
TTTTCCATTGACG

>novel\_circ\_000586

CTGAATGAGGCTCATGGAACCCTTGGGTGTTGCCCCGGATGTGGTGGAGACGGGCGCA  
TTGAAAAAATGGTCCGACTTTCCCGTCCAACACCGATTACACAGACTACTCCAATTCTAT  
TGGAGAACCAACTCATCATACTATAAGCCCTTTTCCATGTCAACCAACGCTTAACAACA  
AACTTGCGTTATGGACTGGCGATATTTCTATTTTACAAGTGGATGCAGTAGTAAATTCCA  
CAAATGAAACAATGGATGATAATAGTCCTATGTGCCAAAGAATATTTGTTTCGGGCTGGA  
TCAGCACTTAAATGGAAATATTTAATGAAATCAAAGAATGCAAAACTGGTGAAGTAA  
GAGTAACACAAGCTCATGGTTTACCAGCACGCTTTATTATTCATACTGTAGGACCAGTAT  
ACAATGTAAAGTACCAAACAGCAGCTCAAAATACATTACATTGCTGCTATAGAAATGTT  
TTACAAAAAGCACGAGAGCTTGGTTTACGCACGATTGCGCTGCCAGTAATTAATTCTGT  
ACGAAGAAATTATCCTCCCGATGCGGGAGCACATATTGCACTGAGAACAATGAGAAGA  
TTTCTGGAGCAATATGGCGATTCTGTACATGTATTGTACTTGTATTGGAACCGTGTGAT  
CTTGGAATTTATGAAGTTCTTCTTCCACTCTATTTCCCAAGAAATTTAGCAGAACAAGAT  
AACCGTGTTGGCAACTACCGAACGATATAGGTGGAACGGATGGAGAACCTTTACTTC  
CTGATCGACAAATTAGAATTATCGATAATCCTCAACATGCTTTACATGGTGATGAAAGTG  
TAGAACTATCTGCGCAATTAGAAACATCTGTGAATATTGGTGAACATGCGTTTGCACAA  
ATGCAGGGTGATTTAGATCGACAAAGACTTCTTGAGAAAGGCCACCTGCTGATCCAC  
TTGCAGATATCATGTTGAAACAAATGCAACAGAAAGAAAG

>novel\_circ\_000587

CTACCTCAGAAGAACTACTTTGATGTCACGATAAGAGGAGAAAAACATAAGAAAGAC  
AATGAAGATCCTTGGCGTGGAATTCGCACCGTTGAACGTACCATTGAAACGAAGATTA  
GAAACGCTTTCAGCTGCGTTATGGATCATTCTTCTAAGCGGAGGAGATTTAATGGGTTA  
CCTTCTTTTTGCTTATCTTCTATTGTACTCGAAATCACACGTTATTTTGTGCTGCTGTAC  
ACACTCTGGATGTACTATGATTGGGATACATGTAATAAAGGCGGCAGAAGCGAACGATG  
GACAAGATTGATGAGAGGCAACGCGTGGCAACGTTACTTTTGCAACTATTTCCCTATAA  
AATTAGTGAAAACTACCGACCTGGATCCGACTAAGTCATATTTATTCTGCAGCTTTCCAC  
ATGGAATTCTGTCCACAGGAGTATTCGGCGCATTTCGGAACGGAGCATCTCAACTGTAA  
AAAAGTGTTTCCGGGTTTGGATTTCGGGGTCGTGATACTAGAACAACACTTTAAATCC  
CGTTCCTTCCGTGAATATGCCTATATGGGAGCCGGTATCAGCAGTTCCCAAAGAAGTTTA  
ATCCATCAGCTATCGACGAAGCCCGAGGCACCGTTCACCGGAAGAGCAACCATTCCTG  
TTATCGGTGGAGCATGGGAATCATTGGAATGTAAGCCGGGCAAATATCGTATCCTGCTA  
AAAAGGAGAAAAGGCTTCGTTAAGATTGCGCTGAAGCATGG

>novel\_circ\_000588

GCTTGACAAGAGCGCCGATGTATCCCTTCTCCACGGGTCAATATCCGTACCCCATGCTT  
AGCCCGGAAATGACGCAAGTCGCCGTTTCTGGCACACACCGAGCATGTACCCCATTT  
CCCCGGCAAGCACTGGTTTCCGAAGTCCGTATCCCACGAGTTTGCCCATCACAAGTTCT  
AGTTTACCAAGTGATCTCTACCGTTTTTCGCCGACGGGCCTGATGCCTCCGCATCCTGG  
ATTAAGTCCGCACGCACACGCGTTGGCGTCCCACGCATTGGTGTCTCGGCGCCGAAG

ACGGATCATTCCACCCTAGATCACAATCACAG

>novel\_circ\_000589

TAGCCGACTGAGTTCGCGAACTTCGATCCCTCTTCTGCAAAATCTTCCAAGCAGTGTAAGGACAGCAAAAGCAGAACGCCGCTTGAAAGAAAGACTAATACAGGAGGGTATAATTCGGATGAAGATGAAGAAAGTCATTTAAGTCCTGCCGAACAGAGAGCGTTAAGAGCAGAAAAACGTGCGGCGTGGAGACAAGCACGTTTGAAATCTCTGGAACAAGATGCTCTTC AAGCACAGATAGTAATTAATAAAAAATGAGTGAAATGATGGACACGAATAAAACGAGTTC AATGCAGGATTCTACAGATATTCCTATTATTCTGTTTCTGAATCAGAAAAATCAACTGATTTCACTACGTTACGGCCGTCTAGTGCAGATTTTCCCAAACCTTGCTGTACGTAGCAAAGTGGGTCCCCCTAAAGAGATACGCGAATCCGAGAAAGTAGTGGACGAGAAGGTCACTCGACGTACTGAGGAATATGTGGATGAGGTGACGGGTGAACGACGTGTGCGAACAGTCGAATACGTGAGAAACTCATTGAACGACAG

>novel\_circ\_000590

CTTCTCCAACAACATCACCAACACCACCTCTGGTAAAGATGTCAGTTAGTGATAAAAAAAAATTGTTTGAAAGTGCCATGGAGGAACATTTAAACCTTCCCCTAAACCAGAAAAAGTATTCAGTTTTCTAAGTCAGGATGAAGTTGAAAAAATGAAACAGGAAGAAGAAAA GAAGATTGCTACTCTAACGCGAGATGAATTAATAATCGTGGGCACAACCTTGATGAAAATGAAGGTTTAGAAGATTTAGAAGAAACATTAGAAGATCAGGATAATCGGCGACCTAATGTGCATGCTCGTTACCTTGACGTAGCCGACTGAGTTCGCGAACTTCGATCCCTCTTCTGCAAAATCTTCCAAGCAGTGTAAGGACAGCAAAAGCAGAACGCCGCTTGAAAGAAAGAC TAATACAGGAGGGTATAATTTTCGGATGAAGATGAAGAAAGTCATTTAAGTCCTGCCGAA CAGAGAGCGTTAAGAGCAGAAAAACGTGCGGCGTGGAGACAAGCACGTTTGAAATCTCTGGAACAAGATGCTCTTCAAGCACAGATAGTAATTAATAAAAAATGAGTGAAATGATGGACACGAATAAAACGAGTTCAATGCAGGATTCTACAGATATTCCTATTATTCTGTTTCTGAATCAGAAAAATCAACTGATTTCACTACGTTACGGCCGTCTAGTGCAGATTTTCCCAAACCTTGCTGTACGTAGCAAAGTGGGTCCCCCTAAAGAGATACGCGAATCCGAGAAAGTAGTGGACGAGAAGGTCACTCGACGTACTGAGGAATATGTGGATGAGGTGACGGGTGAACGACGTGTGCGAACAGTCGAATACGTGAGAAACTCATTGAACGACAG

>novel\_circ\_000591

CTTCTCCAACAACATCACCAACACCACCTCTGGTAAAGATGTCAGTTAGTGATAAAAAAAAATTGTTTGAAAGTGCCATGGAGGAACATTTAAACCTTCCCCTAAACCAGAAAAAGTATTCAGTTTTCTAAGTCAGGATGAAGTTGAAAAAATGAAACAGGAAGAAGAAAA GAAGATTGCTACTCTAACGCGAGATGAATTAATAATCGTGGGCACAACCTTGATGAAAATGAAGGTTTAGAAGATTTAGAAGAAACATTAGAAGATCAGGATAATCGGCGACCTAATGTGCATGCTCGTTACCTTGACGTAGCCGACTGAGTTCGCGAACTTCGATCCCTCTTCTGCAAAATCTTCCAAGCAGTGTAAGGACAGCAAAAGCAGAACGCCGCTTGAAAGAAAGAC TAATACAGGAGGGTATAATTTTCGGATGAAGATGAAGAAAGTCATTTAAGTCCTGCCGAA CAGAGAGCGTTAAGAGCAGAAAAACGTGCGGCGTGGAGACAAGCACGTTTGAAATCTCTGGAACAAGATGCTCTTCAAGCACAGATAGTAATTAATAAAAAATGAGTGAAATGATGGACACGAATAAAACGAGTTCAATGCAGGATTCTACAGATATTCCTATTATTCTGTTTCTGAATCAGAAAAATCAACTGAT



>novel\_circ\_000592

GTGGCCTCACGAGGGAGGGAACACGGCCCTGCCTGAAATAGGCTCCAGCTGTTGAAG  
ACAAGACAGTTGTGATTATTTTATCAACAAATTGCCACATTTAAACGGCACCTCATCTCT  
GCCCTACCAGAGAACAAATAGTTTTCAACGTTTGCTCCTAATGTTTACGCGTATTTTCG  
AGGGAGAACGAGAAGGGCGCTCTTTTTCTTTTTCTGATGATGTACAAATTGACGAAGA  
GGGATGAAAGAGGATTTGATCGAAATTTTAAAAATGGTTTTTCTTTAAATCGTTAACCG  
TTAAATTTATTTTCATTCGACACGTTATTGAATGTAATAAGTTGGATCGATATCTTATCACG  
AATTTTACAATATTTTATTTGTAAAGAGTCACTTTACTTCAAGGAAGTAAAACAGATTT  
TCATGGAATATTTTTTTTTTTTTTTTAGAGAACGTTAAGGTTACATACACGTACATTCTCG  
TGATGTATCTAATAAAAGTCCAAATAGAGGAAAAAGAACGTCGAGCAGGGACAAATAA  
GTGTTTGCGCTTGACCCATATTCCTTTAAATTTGTAAAGTGAAACGTTTGAGAAAGACA  
AAAACTAATCAATAATTTAAAAACCTAATATCCATTAGAAGGAAATAAATCTCAACC  
AATATTGTGAATTTCAAGATACTTTTTTTTTTCATTTGTACGAATAAAATGAATATGAAGAA  
CACTTCATAATTCCTCGATCCTTTTTTTTTTCAAATCAAAAATCACACTCGAATAATAACA  
AACGCTCGAATAATTCGTATGATCGATCGAGATTTGAACGAAAAATCTTAAATCAGTG  
AAAAATGTCAAAAAATATAACACGATATTAATAAATTAAGAAAAAGAAATTACCCAAATT  
AAATGACAACAACAAAATGCATCGATGCATTTTCTCCAAGAATCTCGAAGAATCCTTTC  
GTGGATCTAAGAACGCGCTAAAAGGCTAACCTTGACCCGAAAAAGTGTCGAGGAGCG  
GAACCGGAAGCGCGGACGTTGCGCGTGGTTGTGATCGTCGTAGAAACGTCGATTTCG  
ACCGGCAACGTTTCACGTCGTGTCACGTCGTGGCTAGGTGGATGTACCCTCGAACAAC  
TTGTACTCTCCGACAGATGGAGGGAACACAGAGGTGGTGGAGGAACAGGCAGAGCCA  
GGAGGTGGCCGAGAGGAAGAAGAAGGGAAAGAGGTAAACGCGTATCGTAATGCACAA  
TGGTGCATTAGCCAGGAGTAGACGGTCAGACGGTCTCTCCCGCGGACCGATTCCGAAA  
TTCGGTCTATCGAGGAGCGGAGAGAAACATACATTTTCCGGAAGAAAAATTTCGAAAA  
CCCGGTGTGGGAAAAATCGGTCCAGAGGGAGGCGGGCCAACGAAGGAGGGATTTCATG  
TCACACGCGCGTATGATTCGATCAATTTCCAAAGGATCCGTCCTTCGGTCTTTCGAGAA  
CAATTGAACACCCGGTATCGAAGCCAGGAGGAGTCAGGTATCCGCATGATTCTCATAA  
ACGCTTGCAAGTTTTTCTCACTTGACATCGAAGGACAACGATTGAAGGAGTTAAGTTG  
ATCCGGAGGAAGCTCGAGTATATTGTACATGATACAGAACTGGTGCAGAGAGGAAAAGA  
AAGAAAAAGAAGAGGAAAAAAAATAGAGGGAACGATTTTATTTTCATCGATTGAAAC  
GCCAACTTCTTCTCGAATAAAATCGGCGTTTTGTGCGAAGAAGAGATGGCCGACAATACT  
ACCAATTCGTGACGACGGAAGAGACGGGGAGAGACGACCGGTAACCAGGTGATA  
TCCGAGAAGGCGGTCTGCTGGAATCCATGACGTTGCGCCAGAAATGGTCCTACTTCA  
CAAGAAACATCACCGTGGAGCCTATGATAGCCTGCTACGTGATCCCTTGCATGCTCGCC  
TCCCTCGCTACGCAGAATCTCAGCTTGGAAGAGCGTGCAGGGTGAACCTGGCCTATC  
CCGACGACGTTTGCACGGCGTTGGCAAGGAGGAACACGACCGGTTACGAGAAGGAG  
GAAATCGCCGTTCAACAATTGGTCGCCGGTATGCAGACGTGGAAAACAGCCCTGTCCA  
GCGGATTGCCGACCATCTTGATCCTGTTTCATGGGCTCGTGGAGCGATCGCACGGGATTG  
AGGAAACCGTGCATGCTGTTGCCCATCGTTGGCGAGTTTCTCAGCAGCGTCAGCATGT  
TGCTGTGCACTTACTTCTCCACGAGGTGCCCATGGAAGCGACGGGCGTGCTCGAGGC  
ACTTTGGCCAGCGTTGACAGGGGGTTGGTTCACAATGTTTCATGGGTGTTTTTCAGTTACA  
TCGCGGATATCACGTCCGTGAGTCGAGGACGCTTAGGATCGGCGCCGCTAACGTTTTTC  
CTGTCCCTCGGTGTCCCGATCGGGATGGCATTGTCCGGGATATTGTATCTGAAGCTTGG

CTTCTACGGTGTATTTCAGCATCTCGACCGTGTGCTACGTGTTGAGTTTCATTTACGGTTT  
AGTGGTGATCAAGGAACCGCCTAAGCCGCATCTGAGGAAAATGGAGAAGGCGGATAA  
CGAGAGGATGTCTGTGTGCGCCTCGATCTTGGACTTTTTTCGCGTTCAAACATATCGAGG  
AGACCTTCCGCGTCGCGTTCAAACAGGGGAGGAATAACAGGCAGAAGAGGGTGCTGG  
TGCTCATGGTTATCGTTATGGTTGTGATCGGTCCGCTTTACG

>novel\_circ\_000593

AACGAAAACAGAGCCCTGCGACTGAAGGAGCCTGCATCGTTGGCTCTCTCCGCCGGA  
AACTCCGGCAACTACGTGGACCCAGATGGCACC GCCATTGTGATGTCATCCGAGCTGC  
TACCTGCACCCACCCCGGATCCAAGGGTGACGTGGA ACTACTTCGATGAGCAAGGATA  
CGTTTCGAGAGGAGGATTACGAGCAGGGGAGGATCCATATGCTAGGAACAAATTTAAT  
CAGGAAGCATCCGACGGGCTTCCCAGCAATCGTGATATCCCTGATACGCGCAGTGCGA  
T

>novel\_circ\_000594

CTCTAGAAACGTGGTCCGACCAAGCGGAATCCGCCAGGAGCGTTATTGTGCAACGGTT  
AATCGACTTGCTGACGCGAGGCTCGCGAGTTGCTCGTCCACAGTGAAAGGATCGGTCT  
AACGCATCGGTGATTTCGGCCGAAAGCTCGGCCACAATGTAACCGAGGATCTCCGGTG  
AAAGGTAATAACACGAGTTCGTTGCCCATTTTTTCCCTTTTCTTTCTTTCCTTTTTTTT  
TTTTTCCCCCGCTATGCCTTCGCTCGGATCGATCCCACATGGTTAGACGATAATTTGGAA  
CCGCGCACGGAGAAAGTAACCTCGCATTTCTCTCGTTTCGTTTCACGGA AAATCATCCTT  
CCAACATCCAGTAGAGTTAGTGACGTTTCGATAAGGAAGCGAGTAAATCGATTTCTGTG  
AATGAGTTCGTGGATTGAAGACGGTTTCACATCCACGTCTTTAACATTCTATTGAATTTT  
TGATTATAGAATTTATGATAAGGATAATTAAATGACTTTTAGAGCGATGATTGAATGTCTG  
GCTAATAATTCGATAGATATGATAATCCAGCATGCTTCATTATCAGGATTATGGATACATT  
TATATTTATGTATTTCACTCTTCATTGTATTAAGTCATTTTTTTTGTTCATATTATTAGAGAT  
ATAATTCAATAATTCTTATTTTTTTGTTGCTTAGAAAATAGAAGAATTAAAGTTCAGAGTG  
GAGAAGTCTCGTTTTTAACATAAATTAATTATTATTGTTGTTATCGAGAAGCAGCTCTCT  
TCGTGATAAATTAATAAACGAAGTAAACGCAAAAAATGTA CTGATCGATGGAAATT  
GGAAAGTGTTTACCTTTTCCCTTGATCGATGTTCAATGGCGGCCAGCCTGACCTACATG  
ATCTTGCTTAAATTTGCGCATCCGATAAAAATCGAGAGAAAGAATCGAAGTTACGAGGT  
CGGGTGCAAGCGGAACAGGTATTGGCCGCCTGGTCGGTGAAAGTTTCTAGAGAAAAA  
GTGATTGCAATTTATCCGTAGAATGCAAGGCGAGAATGTGCGGCGTGCGTTTCGTTGCTT  
CGTTTCCTCTTGCAATCGAATTGCTCACATTTCCCTCGGATCGGGAAGAAAGTGAAACT  
TGCGGATAGCGCTGTTTCGCTCGTTTCATCAGAAACAGAGAAGAAGATTCTTCTGAATCA  
CTGTCCTCTCGATGATACGTTTCAAGAAAAATAATAGTCTCCTAGTTAATCGAGTTTTTA  
TTATGATACTCAATCGATAAATAAACTGAATCGAGTATCAAGTTTGAATATCTCGTTAC  
GTGTATAGTGACTAATCGGTTTCAGATTTCCAATGAGTGTCAAGACCAAACAATGTTGG  
CGTGTCTGAACTTTGTCTGAACTTTGCAACGTTGCAATTTATCCTGTAATGGATCCTAAT  
TGTTTAGTTATTTAGATCGATCCGGATTCCAAACTATAATGGATATAAAATTAGGCTAAG  
CGTACGTGAAAATATCCAGTAAATTAATTCGGCATTTTAATAAAGACTAAGCAATTAATT  
AGTCACGGTAATATTAAATTAATTAAGTCGAAATATCCTGTAAATTTATCTACGTTGGAA  
AAGAAAAATTTCTACAAAATATATTCATAATTTATAAAAAAAAAAAGAAAAGGAAGAA  
ACCCAAAGAATCATCGAATACAAAGGAAACATTTCAAAAATCCTTTCATTCCAATTTTC

ATGAATAAAACGACAACAAGTTCAATTAATTTCTAAAATCCTGAAAAAGAAATAACAA  
CTTTCAATTCTTCTTTAGAAATCAACAACGGATAAAGTCACGCAAGAGTATTATTTTCCA  
AAATTCTTCTCGAATTTTCAAAAAAAAAAATATATATATACCGTCTTGAAGATTTAACTT  
CATGAGATGGCGCGATGGCAAGAATAACGAGGAGAACGAAGAATCGTTCCCGTTCTTC  
TGCGAAAGTTAAATGGACCGCGCGGTTAATCCGCCACAATGGCCGCGATTGTAGTGAA  
ATATGTGTGCGTTTCCCGGAAATACAGATGGCGCGCTCGCTCGAAAATTGAAACGCGG  
CGAATCGCACGAATTCGGATCGATCGGATTTATTAACGATCCACATCGGCTGGATCTA  
TCCCCTCCCCCTCCCCATTCCCGTTTGCAACCCGTACGTGTTATTTTATTAACGCGCGTG  
CTGTCACGTGTTGTACTGCATAATCGCAGTTTCGCCCCGTGGCCAGCGAATTTAATGACA  
CGATCGAACAGTATCGTCGGATGGGAACAACGGTCATTGAGAGATTTCAAGCGCGAAT  
GGTTATCAATAGCGCTTCGTGAGATACGATTCCTTTTTTTTATTCGAATACATTCGAAATGA  
TTAACAATTCATTCCGATATCGAACTTGGAATAAAGGAGGAGGGGTTCGATCGAGGTC  
GAAAAGTCGAGGGGAAACTGATGGAGATTCCCTCTGTAATCAAATGGAACCTGCACCT  
TTCTCGTTAAACTATCCACGTAATCAAGGGAATGCTTTTTCTCCACGATGCATCACGAT  
ACTTGTTGCGGCAAAAGGCAACAATTACGCTCTTTATGTTAATTTTACGAGCACTTGGA  
TCGTGTATTGCGATCTGCAACACTCGATGACGATGGATTTGAAACAAGGCCACGAGTA  
ATGATGATTATTAACAATTGGGAATCGAGAAAATGTTCTGCGGAAGATTTCTCGATAT  
TTTTCTCCTCGTGAAGAAGGAAGTTCGAGAAAATTTATATACGTAAGCTCGATTAT  
ATGTGCAGTGATTTTTATAGCGCAATATAATTGAATTAAGAGAAAGTTTTTAACATTATA  
AAGATTAGATAAGAGATTTTAATTGAATTTTAAAAAGATTATAAAATCGAAGTTTATAGG  
TTGAACATTCAAACAGAGATTTATTAATATTTTAGAGAAGAAAAAATTACAATTACAATT  
TTATAACAAAATCAATTAGTAATACCTGTTGTTTAATTTTATGACTCGTAAATAACTGCAT  
GGTTTTCGTCGGAATCAATTAATAGAATTATGCAGTTTCTTTAACTAATTATCACAGAA  
TCGACAGATTTTTTAAAAATGGCCAGCCATCGTAAACAATTTATCGGTCCATTAAACGGC  
TATTAATAATGCATGGCGCAACGCGGATCGGGTTAATTGGCCGGATAATCGTAATTAAAG  
GGAGTTCGATTCTTCCTTTTCCCGCGCCGTATAAAAACCTCATCCCAATGGGAATATCGGT  
TGAAACTAACTGACTCGAACGTTGCGCGATATCTTCATTGATTTTACACGATAAATTAAT  
CTAGAACGAAAATATGTTTCGAGTAAAAATGATTATTGATTATTATATTTTTTTTCTTAGA  
ATTACAAAATTTACTTTATCTTTTTTAAAGATAAATAATACACTTTTCACATGCAATTAAT  
TTCTATTGCAGAGTGATATAGATTAAAAATCACACGAAGAAACAGATATATAATGTATCT  
ATATCTCACAAGCATTCCAAGATCTTTTCTTTGGCGGCAATCTAAAATAAATAAATGCT  
AGAAGAACGAACCTACAATTGATTTATCCAAACGTCAATTCAACTGAACTGTATTTATT  
ACAAAAAATTATAAATCACGATTCAAGACAACAATAATAATTATTCTTAATTGAAA  
AATCTTCCACAAGCGTGAAAGAAAATACGATTATCCACTTCTCAACGAAACAATATGC  
AAATCGCGTCTTCGTTCTTCAGTTCTGAGACATCTTCTCGCGTTGTTTTCGCGGGAAG  
AATTATTGCATCTCTCGGTTAAACGTGTCCAAACAAACGTGTTAAACAATCCAAGGA  
TAAGGGATCTTCTTACGAACGTATCGTTGGGAAAGAGAGAATTTATCGTGGGTTTCGA  
TGACGATAACTTTTTCTTTTACAAAAAGAGTTGATTAATCCACGATTTTGAATTTCT  
TCCGTTTGTTATAGAATCTATCCTTCGTTTCCAGGGGAAACTGTGGAAGAACTTGCAAC  
GAGAGAGGGTAAAGTTAACGTATAGAGGGAATGATAAGGATCAGAGATGAAACGATAG  
GCTATTTTTTAACAGTGGTTACTTTTTGTTGTGACCCTTGGTGGAGCATGATCTGCAATTA  
TAATTGTCATGCGTGGATAAGCAACGTTGCTTGAAAATATCACACGGCCCCGTTCTATA  
AAATATAATAGCTTACGGTAATTTAATATATTATTTCAGAATTAGGTTATCGTTATTTT  
TTCATCGAAATTTTTGCTCTATAGGGTGTCTTAGTTAGAAAGAATCGAATTAATTCCGGA

TGTTTCATTTTGCTTGTTTTTTGTTTGTTCATCAAAATCAAGTAAGATGTTTCATCTTGTAAT  
TCAAATATTTTTTTGTAGTCAATCAGCATTCAATTATCATCGGCCAAAATATATACCAATTAT  
ATCTCTTACTTCAAAATCTATATTCAACTTTGACAAAATTCATAATAAATTAAAAAAGG  
AAGAAAGGAAAAGAAAGAGTTAAATCCATGAAGAATTGACTGTCTAATTCTATCATTCA  
TATCACGATTCGTTTCATATCAAAAAATAAATCAGAGGAGACAAACAAAATTCACTTTAA  
CTTCGATTTCAACTTTTTGTCCGCGAAACGGATTACCGGATAAGTAGGAACATCGGCTAA  
CACATTTACGCGGAGAAACAAGGCGAAACAAAATCCTCGTTGGCATTAAAGTTCTAAA  
GTACAAAGTACCGGGATTACACCGGTGGAACGAATCGCCACGAGTTGCACGCTCCAA  
ACTCCATCACGCATAATTATCGTGGACCTCTTGTCGATTTCGAAAGAATCTTATCGATCGA  
AGAAGAGATTTTCCATTTTAAGAATCGGCCTATGATTGAAATAGCGATCAACGATCATG  
AAACACGAGCATTACGTTGTACAATACTGGCAATCGAGGGTGTAAGTAGTTTGTGTGA  
GGCTAGATTGATAATTGTTTCGAAATTTGGATTTTACACGGGGAAAATTTATTAGCAGGC  
GGAAATACGTGATAGAGCGTCAATTATCCGAATTGGATTGTATTTTCGGGAAATCGAATT  
GTTTCGATAATGAAGCATGCACGTGTTTACGTGAATTTATAATTGTAAGAATTATAGTTA  
AAATTATCAAAATGCGAGAGAAATGTTGTTATTACAATTCGAGATGTAATTGCTAGAAG  
CGATTTATTAATACTACATCGAGGTAAATTATTTGATATTTATTAATGACGTTTACGTTTGTA  
CGTTTTAACGTTAAAGTAAGTAAACTTTTTTAAATGTTGAGCCGACGAGTTTGACTT  
TTTTCTGCGTATCCAATTACTTTGTTTTTGCGGAGTTAAATGCGAACAAATAAAAAAATT  
GTGTTAATAAAAAAATACGGTTAATCACCTGGCTTTTATATATTTTGTAACAACGAAA  
AACTTTTTATATAGAGAAAATTTAACGTTTCCTGAAAAACGGGTGCCAGCTTCCTGCG  
TTACACGATATTTCTATTATTTGCCGGTAACAAACGTTGCCTGTTCCGGTAGATACAGG  
AGAAAAACAAGGAACGCCAAATACAAAGAGACAAATATCCCCTTGACACGTTATTTAA  
TAATTATTAAACCAATCTAGAATTGAACAATGTCCAAAACTTTAAAAATATTTCGATCGAT  
CCAAATTATTCCCTCTCTCTCTTTCTCTGTCCAATCTTATCTCTAGGGTGCAAAAAGAAG  
GTCATGGAATAATCAAGGATAATCTCGATAATCCCCATCTCTCCGTTCTTTTCTAATTTCT  
AATTACCCCCGCGTTTCGTTATCGCGATTTCCATACAGATGATCGAAAGAATCGATCATC  
ACACATTTTCCCGACCGGACAAAACCGCGGAAACGTGCTCGATCGCTCGTGAAAATT  
TCCATTTCTGCTCCAACGATCGCCGATTTTTTTTTTCCCAACCGATCGAGAAAAA  
GGGAGGGAGAAACCACCGATGCAACGTGGACAAATTGCGTTCTCGAACGAATCGCAA  
TCGTTAAAAATGTTGAAAAATTGTCTGGTCGTTCAAATACGAATTCTAACGTTTGTTAAT  
CCACGAAAGGACTTTAGAAGCGCTATTTTAAATCGCTTAATCGATTAAAGAGACGCATC  
CCCGTTGACGAAACTCGACTGCGCATTACAGTTTGAACGTAAACCTACGCAGAGAAG  
GTATTTTTTACACAGCCATTAAACGTCCCTATAATTCATATACAATTTTCCACCATGTTATGC  
GATCGAGCACGAAAACGCGTGCCCGTTTCGAAATTACGCCTCTCGATTTGCGCGACGAG  
GGTTGAAAGTGCAACTGTACGAAGGTGACCGGGCGAAGGTGATGATTATTAATCCTGG  
GCCAGGAATAATCGGAAGGTTAAACGACGCATTGTTCCATAAAATATTTCCACGCGACG  
TGCGGCACGCGAGACCACGATCACCGATAACTAACGGCTGCGTGAGCTTTCCAAGGGA  
TCCCGAGGCCTCGAACAACGTGCTGCACTGCGGATATCCAGCCAACGGCCTCCCCC  
AATGCCGGCCAAGGCATTTCTCGGTTTCAGGAAACGCGTCCATTCGATTCTAACTCGAT  
GTTGAAAATTATTGCAAATGGATGTTTATTCTACAACGCGTGATATGCATTGCGTATTTCT  
ATTTTTTCATTGTTTCCGGAATGAAAGTTTTTTACGGTTGATTTGATTTCCAACCTCGAAA  
AATCGAGTTATAAATTATAGTAAGATTGATGAACGAATTTGTACGACTAATTAATATTATA  
GAGATGGAGTAAATTGTTTTCTTTTTACAAGAGACTACATTTGCACGATGAATATTTGCA  
AAAGGAATCAGACGAAAAGGAAGAAAAAGTTTCTTTGGATCAATAATAGTTCTTATAA

ATGGATTCTTTATCTTTGGAATATTCAGAGAAGAATAAGAAAACAACTCCTTTTCCCTTC  
CTCGTTGAACATCGATCTGTTGAAAAGTTGACGCAAAATCAAGAATCGAACGAATAAT  
CTTCGAACCGTGCTCCATCCATCACATTCAACTTTCGAACCTTCTGTATATATACCATCTT  
TCCAAAGCGAACGATAGAAAGTCAAGATGGAAATTTCCATTATCCAAACGTCCAAGCA  
TCTCTCGAATCTTTTCTTTTCTTTTTTTTTTATTTAAACAAATCTTGCGAAAAGATCAGAG  
GGAAAGTTTTCACTTATCCCTTGATCGTCCTCGAGAATCCAGAGCGCATAAAGAATTGT  
GGGAATCGGTTATACTGGCGTAAATGATTTTACACGGAGGCACGATTAAGTCGAACGCG  
AAGGAGGGAGCTCTGTTTCAGCTCTGATTCCTGGCGTGATTCGTGGCCCGGAAAAGCGG  
TTTCCTTCGATTCATCCATTTTCGAAAGGAGAGGGGCAACGCGAAATAATAGATCCAAAT  
CAGGCCGTTTAAATTCTAAACCCGAGGAGGAGCCGAGGTTGGATTGCATTAGATTCAC  
AAATTAAGAGGCCACCCGGTGTGCCAGGCCGGCTAACAAAATTCTCGCGGAACGTTTA  
ATGAATTCTTACGCGAGCGGGCGTAGGCGGCAGTGGATTAAAATTAACTACGTGTCCC  
GATTGTTATAATTTTCATCGGTGCTTGATACTTCTTCGATGGCGAATAAAATTTATTCTT  
AGAGCCAGAAGAAAAAGAAAGGAATTATCGAGAAAACGATATTTGGATCAGTAGCAA  
GGGATGTTTATTCAATTGGAAATAGATGAAATTGGATTATTTGTGCACTGTACGATTTTT  
CTGAATCGTGGACGTGGCTTATTCGAAGGCTAAGACTCTGCTCTAAATTGATTAAAGCTT  
TCTCCAATTATCGCGATTTCGTAACGCCTCGTAACAAAGAACATACCGAGCATAACAGACA  
GAGATAATTATGCTTGAAACGATAATTGATCGCAATTGTAGGAAGACAAGTGTCTATCC  
ACTCATCTCGGGATCAGAAACGCGTTGAAAGCTGGAAATTTTAACTTTGGAGTTCGC  
CCGAACGACTCGAGTTCGAACTCGTCCGTTTCTTTAATTAAATCCGTTTAATGATTAAA  
CGTTTGTCTTGGAAGAGGAAGATCCGAATTTAAATTTGAATTTAAGTAAGAATAAAGA  
TGGAATAAAGAAAAAAAAGAATTTAATTACCTTCTCGAAGATGTTGGAAAATATTCAAT  
GGAATTATTTAGGGTGGATAACGCGTGCCACGGGAGCGGATAACGATCACCGTGGAA  
ATAATCACATTGCGCCGCCAGTTAAATCTTCTTTGTGAACAATCCTATTTACGGGTCATTA  
GCCACAGGCGAGGGGAAATAAGGTGGATGAAATTGACGCAGTCTTGGCGGAATGGAC  
GCCGTCGATCTCGGCGTTTAATCAGTCTCCTCCAAGCTATGGATGCTGCGATATGAAAT  
GATCTGCCCACACAGATCCTGCTCAATCGATTGCAAAAGGATTACGCAAAATTTCCAGG  
CCTTCGTTCTGTTATATACTTTATTATTCTCGAAAACTTTGCAAGAGACGGATATAAAT  
CTGTACAAAGATCTATTAATTGCAAAATTTACTGACTATTTTTTTTTTAAATATTGGAAGA  
GTAGAGAACGAAGATTGGTCAATCATCTTATCTGTCAATTCTCGTGTGTTGTTAAAAAA  
AAAAAATCGTGATATTCGAAGAGAATTGTTTCATGACAATTATGGGGACATCAATAACC  
AGAATTTGACCAGAGATATCTACCAGATAACCTACGCCTGGTTTGCCCACTCGATCCC  
GTTAATGCTTCACGAAGTGTTGAAGCAGCTGAATCAACTCCTCCATGCTCGAATCAATT  
AAATCAGCCGAATTAATTCGATCTCTTAGTCCTTAATCGAGATTGCTCACGCGATTGACT  
GATCCTCGAATATCTATCCCTGAAAAAATTGTGCGGGATATTACGCAGCTACACTTTTTT  
TTGTTCCAACGTGTTCAATTAATCCATTCGAAGTTCATTGATATTCATCGATTTCTCTCTC  
TCTCTTTAAAAAGAAAAAAAAGAAAAAAAAGAACCAATCTCCACGAGGGAATTAT  
CGTGGATTATTAAATTCGTCTTCGTCAAATTCATCGAGGGCTTAATACGATCCGATTTT  
CGTGAACAAACGTCAATGTGAATTTTATTTTAACAGGTGTTTCAGAAAACGATTCGTCAC  
GCGAATTAAATTGCACCGATTAATGCCTGAATATCGAAGACGATGGGGAATAAAAATGT  
TTAAGACTCGTGATCGAGAGAATTAGTTAATTGTTCCCATTAATTTGACTTTGATTATCAT  
AGTTTTATTTCTCGTCTCTTGACAGAACTCTCGAAAGAAAATGTAGGGCGAACGATCC  
GCTCGTTGGACTGGATTAAATTTTTTATTATTGAAATATCCTCTCTTTCTTCTATTATCACA  
CGAAAAACACAATTTTTTATAATTCTTATTTTACAATTGTTACGTATAGAATTATTGCGTTA

AAAGAATAATAATTTTTCAACTATTTTTCTATTTTTAAGAATTCCTCGATCTCTAAAATT  
CTTCCACTCAATCTCAATGTTTCATATTTACAAATCCTAGCATACGTTTATTATATTAAAG  
AATAATATCGTATTAATACTATTTTCAGAAACAGATATTAAACCAACTTAAAGAAAAAAGA  
GCCATTTTCGAAGAATTATCACTTTTAAGTTCGCTCAACGACTCGCAAATTTCCAAGTTGC  
CGCTAATTAATGCGATTTTATCCTCAGCTCGCCAACCTTCTTCGACCCACCTACATCAATC  
AAATTGAATGATACGAAAGGATGGACGAGCGATAAATAATAATTATAATTTATCCGAAA  
GTTTCGCTAATTAGTTGGAACACTTATACGCGAACTTTGGCGTATTAGTCTATTTCTCGCG  
ATTATTCGTGTCACGCGTTCGTCTGCAAGTTAAATACCCGGCCTCAAACGTGTTTCAATC  
CTCGTACCGGTTTGTCAATTGATATATACCGTGAGTGTGGTTTCCGCCACGATCCGGAAG  
TTCATTGGTACCGCGGCAAAGATTCCAGAGTTTGAAGCGAACAGAGAAATTTGTGCAG  
GTGGTATGAAGGTGTTTGAAAGTGTGTTGCCCGATTCTAATTCATAGACTTATGCACGTCT  
AAAGTAGATATTTAAATAATCGTGTGATATGCAGATGAATATATATTAGTTAGCTATTCTA  
GTTTCACTATTTCAATTATTCTATCGAAATAAAATTCTCTAAAAATGTGGTATATTATCAAA  
CATTGTTTGCAAATAATTAAGAAAGAAATTTGCATTCTATGCTTAATCGAATCTTTAC  
AAAATGCACGATTGGTGAAAAAATGAATCGACAATTAATCGTAACATAGCCTCAATTTA  
AATATTAGAGATGCAATAATTTAGATAGTAAGAAAATCTAAAAACTCGTGCATCTCGTA  
ATACTATATGATACTATAAGAAAAGATGAAGGATACTTTCTCGATCGTAAATAAAATTTT  
GAAAGATCGGAGAGCAAGTTATCTTTGAGGAAAAAATTGATTTCGAAAGGGAATGGTG  
AGCATCTAGCGCGACAGTTTTTCGAAAAGGGACGGAGCCAGGGTTAATTTCTGACGGAA  
GGAGGAATTCTGTTTACGCAGCCGTGCACAAAGAGACTAATTCGAAGCGAAACTACGG  
GGCGGAGAGGCAAAAAGGTCTTTTCGCCTCCCTTGGAACGGTGAATTGAATTCCGTG  
AGCGGAACCATCGAATCCTCCTTCCCCCCCCCTCCCCCGGGGTGCAGATTATACA  
TTTAACTCGTCGTGGAAAAAGAATCGACGATCGGATTGCCCGGATTGATCTCTAGCTT  
TCTGCGCGGCTGCTTTAAAGCAATTAACTAGCTAGACACGGGGTGGAATAATTTCTTTC  
CTCTCTCTAAATCTCGAGACTCGTTTGTGGAAGGTCGATTCTCTCCATTCGTTGTCTGTT  
TCGCAATGCTTACCCCTCCCCCTCCCCCTTTGGAACTTGAAGAAATCTTGCGAAAAA  
GAAGAAACAATAAAAAAGAAAGGCTATTTCTCGAAGGTCGATTCCACGATTAAAGACT  
CGTGAAGTTTTTCTCTGGATGGATAAGACGTTGGAAAGTTCACGTCGTATGAGATACAA  
AGTGGTGGATTATATGGTGGCAAGTTAGTCCGGGGCTATGTGAAATTCAGGAGGTTTTT  
TTGGATGTGAACTTTGAAATTTCCGTAAGCGATCTCATCTTCATTGAGATATCACTTTC  
CACATAGTTATTGGATAACTACATCGAAATAAAGCAATAAAATATGTTTCTTTCTAAAA  
AAAATCGACCAACGATCGATCGATGATTTAATTATTGCTTAAAATATATTTAAATATATTAT  
AATATTAAGAAAGAAATTACTGGTAGCCTCAATGATAATAATTTCCAATTATTTAATCCA  
GCAATTCAATTTAATGAATTAGCAACTTAACTCTTTCAAAGAGATGGGCCAAGCCAAG  
GCGATAGCCTTGTAGCGACATTTTCATCGCTATTTCTATGCTATCTTTCTTTTCCCTTGT  
TTTTTCAGACTGCTTATCCGCCTGTGCTGTTTTCGTTCCCTGTCTATAGCCTGCAGATAG  
AATTCGTTTCATTCTCGATAGTAGCGATCGAGGGTTTTTCGGGGGATTATTGGTTCATGAA  
CAACCCCTCTTCGCCCGAATCGGTTCGAGACGGTAGCTTTCTATCGAAAAAGTCGCAT  
CCACCGGATGGTCTGGCCGAGATGGAACCTAATCAGTAGGCATTACGTTGCCTCGTCGT  
CTTAACAATTTTTCGATAAGATTTTCTACGATTTTAATGGAACCACGTTGAGTCAAGGAT  
GAAAATTTGTACAATTTTGAGTTTCAGATTGAAGAAATTAATCATCTCGAATTGAAAA  
GTAAATTGTTCTATCTCTTTCTTTCCAAGAAGAAATTTTTTTCTTGGAATAACAATAAT  
GATGATAACACGATGATAAATTGGTTAAAATATATATGGAAACATGTAAGGCGTATACAA  
TTTTTCTATACAATTATTTCAAAGTATTCTCATAACAATGTATATGCCTGTTGTCCAATTTT

CTATCAAGAAATCGAGATTCGCTTCAAACCTTCAATACCAATCGAAGTACACGAATTATA  
AAATAAATTACGTCATTTACAAGCCATCCATCCATCCAGGAAATAACAATCTTCACGA  
GGTGCACACTGTAATCCCCGAGCATCTCGTAAAATTATCATAGCGAAAAGCCAATGGCT  
TATCACTCCATCAGCCTTATCAGGCATCGAGCGCAAAACGCTTCATCTACTCGAATCTC  
CATCAATCTATTTCCGCGAGAACACGGTGTTGGATAACGATCCAACGAGAGATCCGA  
CCAAGAGAGGATATTAATTATTACGAGTGTACTCGATATTTACCCGTAACACAGCTCCTT  
GCGGATGAATTATCACCCCTTCACGGCTATTACGGCTGCCACGGCTAGATTACCCGTGATT  
TTCCGGTTTTGAAGAGGTTCTGGACGTGGCATAGGTCGTTATTGGCCGCGATATCTGCT  
CGAAAGTGAAACGCGATTTCGTTCACTTTTCGCGCATATAATAATGCAGCCTGGATGCGAT  
GCTTATGTAAACCATTTCTCTCGCCTTTTCCCAGCCAATCAAGTCGAGAGTTGGCGAG  
TACTTGAGAACGGTTAAAGCGGGATAATTTGAGATCTCTGGGGCAATGATCGCAGGA  
TGATTGAGATTTAGAAATTTAGACAATTCATCAGATCATTGTCTTGATCAGAAGAATTTT  
TACACGCAATATCGTGTATCATCAACAGAATATACATCTATTCTTATGAATTC AATTTATC  
AAAATTAACCAGAAAGAAAGAAAATCAATGATGGAAAGATTATTAGATATCACAGTCT  
GATATATATATACCTTTTCTTCTTTTTCTCTCTCAATTTTTCTTAATTTACGGGTATTA  
TTGAAATTCTAGCTATCGAACTTGATTTAATCATTATGAATTTTACAAAGGGACAGGAAT  
TTTATCGAGAAATTTGAGGCAGACGAAACAAAACCGGTCCGCGCGTAATTGCCTGGC  
CTGGAACAAAAGGGTGGTCGCGCAGGTGAAAAATACACGGAGGGGGGAGGGGAAAAA  
CTGGCGCGTTTTCCAATTCGTGGCCCCGATACGGAACCTCCCTTCTGTATGCACGTTTGTG  
TAACGAGATGAGCCCCGTCCTCGAGCAAAGCCGATGTTCTTTGTGCTACTTTCCTTCT  
CGAGGGAAGGTTGGAAACGCTTCTCTGTTGACGCGCCAAGACGTCGATCCGAATTACG  
TTTGACAAGAATCGTTTTCCCCTGAATACACCTGTGTGCGGAGGCATCCCAGGATTTCT  
GGATCAAAGAGTTCATCGGAACATGAATATTCTTCTGTCTCTTTCTCTCAACCAGAAA  
ACGTTCTCTCAAATCTTTCAGACCCTTCAATTTTTCAAATGTTTAGAGCAAATATTCTCTA  
TGCTGTTCAAGCTTTATTTTATTAAGAAATTTAATTTATATAATCAGAGTTAATAGTGATTT  
ATCTTACATTCGGTATTATATGCGTCAAATTTATCTTTCCCTATAAATAGTGCAGTGCTTTT  
TTATAAACTATAAACGGATTTCGATAGATTTCTCACTCTTTATTAAGAATCTTAATATA  
TTTTTTTATACTTAGCTCCAAATATGGAAAGTTTCTGTGCAAATGTAGTTAGCCGCAATT  
CTCTGAATATCTCAGAATCTACTAGGTATTCTGCAGTTCGAAAATCTTCGCCCTTGGGCT  
ATTGGGAGGACAGAGGAGGCGGTGAGTTGAACAAAAGGGGTATCCCATGGACAATGA  
CGTATCTGTTTCGCGCGAAAGTCGCGACAACAAAGCGGGTAAGCTCGGCTAATTGTGCG  
GCAACAAAGCCAGAAGGAAAGAATATTGGCGCGTTTCCAACGTCGATGTTTCCATAGT  
GGCGATAAGACCCTTGAGGGCATGCGTAATTATACCTTCGGTAAACAAGCAGTACTTTT  
CTTCTTTTTTCTTAGTTTTCTTTGTAACTTTCAATCTCGTGTTAATAACCTCTTCTTGA  
TCAATTTTTATAACCGATTTCGAAATCCGATATCGACAATTCGTATCTCAATAGAAAATTT  
AATTTTCATGCAAGTATTATGAATCTAATCTTTATTCCATGTAGTATAAATTTTATTCTA  
ACATCATTAATATCGATATATAAAAATAAATTACTATATCTTATTATTATGTATGCAATTTGT  
TATTCGAAACGGATGTTTTTTTCGATCATTGGAAAATAAACATATGCAAAATTTGATTCAA  
AAATTTTACCCTCCAGCCTTGCTATATTATCATGATAATTACGATAAATATTATTATGATAA  
TTTGCTTTACAAGTGAATTAATTAATTCGTATTTAAAAGATGTACAAGAAATTGCAAAGT  
ACATGTAAACATTGTCTTTAATTAATAATTATCGAATCGGTGAAGAAAAAGAACCGTGTA  
TAAATTTTTCATAAAGAGAGAAAATTAATAATTTCTTTTCTTTCAATGAAAAGTGTCATC  
CTTTAAAGGTTAGCAGGCGAAACGAATCGCCATTAATAATGTGCAAATAAATCGGGTG  
TAGGTAAATGGGCACGATTGCCAGTCGACGATTGATAAATTATCCCGGGAATATATATGT

GGAGTCACTTACGGTTACGTTGATCGACCGGGAAATTTTGTGTTGACACAGCTTTAATGG  
GCTCACCTGAAAATGATCGAGTTAATTTTAATATCGATTGAACTTGAATGGTGCAGGA  
ATGTTGGATTTTAATAAGCGGGGTCATGGTATTTGGAGAAATAATAATGCGTTAAATATG  
GATACCAACGTTAAAAACAATTAATAATAAAGCTTTTTTAATAAAATCATTAATTCATCGA  
TCTCTTTATCGCGCAAAAGTATCGAGTTAAAATAAATCCACCTGTTATTTAATTTTTAGA  
AACGAGAGTACAATACAACCTATATCCCGAAGTTAAAAATTAATAAAGCAGAGCTGTGT  
ATTCAATAGTTTTTTAAAAAATAATTTGCTCTTGTATTGTATTCTTCTCTTAAAAATAAATTC  
AAAAATTTAATTGCACATCTCTGAGTTCAAACAAACTCTTGTCTCTGATATTCTGGATCA  
AGAATCGTACGCAACATCCACTGTTCTATCGCTTCGATATTAATTTTGTTAAATCTCCCC  
CACCCCCTCTTAAAAATAGATGGAATCCCTTGACGGGGGAATGAAAAAATGAAAAAA  
TCATTTTGATTTGATATTAAATACAGAGTGAAGACATCTGTTTCGAAATAAAAACTTGCA  
AATCTCGAGATCAAATTTTGCAACGCTCAATACCGGGTTCCCGTCTTGCTCCATCATAA  
AACCAAGATCCGTCCCATGACGTGAACGTAATCCAGCTCAGACTGCAGTCACGTCGAA  
AAGACGTAGAAATCGAAACAGGGACGGGAGGAAGAATGACAGGGGTTCCAAAGCCAC  
GGGGGATAAGACGGCCGAGGGTGGCGTGTAATTCGTGACGAGGAGCCAGCCCCACG  
CCATCTCTCGATTAATCGTCGCTTCCATTCGAACGGCCTTTCTCGGGAACGATGACAGA  
TCTCCCCTCGACGCGTGTGCGATTGAGATGTCCCCATCCTCGCTAAATCGCACGTTAAA  
CCGACCTAATCTACCTTCTTCTCTGAGGGGTGCGATGTACAGGGTGTTTGAACGAAGAA  
GCGATTCCAGAGAGTAAAACAAACGAGTTACAATAATGGCGAAGTATAATGGTTGCAA  
TGTATTTGCTACGCAACAGAGTAATTCGATAAAATAATTTAATGGCGATACATTGTTG  
CAGATATTTTTTTGGATTTGGATTAGATCGATCGTTTCATCGATATTCTTTTTCTTTTTGTT  
TTGAAGAATCATCCCTTCTAATTTGTCCGAACACCCTGTATATACGGAGCGCAATTCTCC  
CCACAGAGAAATCTGTAGGCCGTTCCACGAGAGCCAATTCCATGAACGTGCCGTGACT  
TTATTCAAAAAATCCTTACCCCCTGCGGATTTATTTGTGCGGAGTGCTGGGGGTTGGA  
TGGTTTAACTTGGCTGACCGATACAGTGAAGTGTTTCTCGTACTTTTCGGGGAAAAGAA  
TTGTAACAATCGATTTTGTGTTGAGGGTTGAAAATCTAGTATGGGGAAATAGTGAATTTAA  
TCTTAAATAAAGTACTTTATTATATTTTTCTCTTTAGTTTTTAAAAAAATTTATCCTCGAAA  
AGATACTTTGTACAGAAATATAATTGTAATCATACACGCTATTGATCGAAAATTTTGAA  
ATTCTATCTAGAGATATCAATAATTTTGCTTATTTTAACATATTAATAATTCGTTATAACGC  
GATAACAAAATATTAATTAAAAACTCCGTCCAATAGATGAATAAAATTAATCAAATAAT  
TTCCCTAGCTACCAATTTATTATAGAAATTTTATAATTATAAAATATCCAATCTCTCTTTT  
CACAGCTCTCATTATCGTCAAATGATCAAGAGAATTTTAAAAAAATTTCTACCCTTATTTA  
CAAGTACTTTCTATCGCGGAATTTTTATTTGGAAATTGGCCGAGAAAAAAGTTTCACTT  
CCAATTCTCAAGATTGTCAATTAATCGATCCCATTCCTGTGCAACTTGATCCTTGGATG  
ATTCTAAGACGCAGAAGAAAAGCTGCAGGAATGGAAGACGATCCAATTTCCGGCCAC  
GGATTAAACACGATTCTGCGCGTGAAGGGGCATCACGTTTTCGTCCCAAAATCGTCA  
CAATTCGTATTCATATCACATTAATGAAGACAATACGAGAAAAAGTGAGTTTAAAATT  
CAACAGCAAATTGTTTCTAGCTCGTGTAACTCGGGGAACGTCGGACAATAGGTTAGAA  
GAGAAAATTTGAGGTGCTTTTCCCGTGTGTTAAGCCGCAAGAAAATTCGCTGAATTTTA  
CATTCAAACCGCACAGTGAACCTCCGTCACGAACTTGACTCCGGCTAAAATATTCCGCA  
TTTGCGAAACCTTCTATTACGAATTCCTTTTATACGCGATTCTACCATGTACGAAACAA  
TGTTTATGTATACAAAAAATCAGCATGAAGAAGTCAGCATCGAAGTGATGGATTAATA  
AAACGTGGAACGTTTAAACAATCGATCGATGAGATTCGATTCGTTTGTTTGTTAACATTT  
CTTTCGAGAAAAATCGTACTTTTGAATTCCTTCAGAGATGGGAAAAAGTATTTCTGATAG



CATTGAACGTTGGTCGAAGAGGTTTAAAAGGCTTCGCGAGAAAGGAAATGGATTTTAA  
ATAAAAGAGGGCTGTCAAAAGGGGGATGAAAAACGAGGCGAGCTCGTTCCAAGAA  
GACTAATCTCCGAAATACGACCATAATCGATGGGAGGAGGGGATAAACGAATCAG  
AGCATTACCCCATTCCTGTCTTCTGTTTCTCGCACGAGAGAGAGAGAGAAAAAAG  
AGGGGGGAAAGAAAGAGAAGAGGAGAGCATCTCTCCTCGAGGAAATCCGTCTTGGCG  
CGGAGTAAACGAAAGAGAACGAGAACATTCTTTGCGTCTCATGACTCGATCGAGGCA  
AAGGGAAGAAACATCGGACCGGTTAAGCCTCGGAAAATTGAGTGACGCCTCGAAAG  
AGTCGCGTCGCACCCTCCTTTGCCCGCTTCCCCTCTCCCAGTTTTCCAACCGATCCTTT  
CCAACGCGAAAAATCTTCGAAAAGTTTCGTTGTTGGAATCTCTGCATCCGCGAATTAG  
AAATGGACCACGATGAGTTCAAACGCAGACGTCGATCAAGAAATTATTTGTAATGTATA  
CTAATAATTGATTAGAAAATTAACCTTCTAATTCTTGATTTCTTGTTTTATCCCGATAGA  
ATGATTTTTAATTTTGAAACGACAATTATTGGAATTACAATGCTATTACAATAAAATCTTT  
AAGAATAATTAAAAAAAATAGATTCGATAAATAATTAAACATTAAATTAATTTAT  
AAAATTTTAATATATAGAAAGATTGGAAGATCTTTAATAATGAATCGTTTTTGAAATTTTT  
AAATTAAACATTGTCGAAATTTATGTAACATCTGTTTGGTTTTATCTCCAAATTTTCACC  
AAAGATTACGCTTTTAATCGCATCTCTATGTAAGAAAATATTCCCAGCAGCTTTGGATAA  
ACAGTGGGATAAAGGATGCGGGGACGTTGATGCATCTCGACGCCGATTTTAAATTGAT  
GCATGCTAATGTATTCACCGCGAGAGCCGCGCTAATTATTCGCCATCCAACGCGTTCGT  
GCTGACGCACAGAGGCGTCCATATCAACGAGGATGACGAGGGGAGAAGAAAAAAAAT  
TAAGTTTCGACGTTACATTTTTGTCTCTCTCCTCTCTTCTCCTTCGTTTTCCATCTATCC  
CCAATGAATTTGAGAAATCTGCGAGGATAAAAAAAAATGAGGATGAAGAGAAAGAT  
CATTGAATATCTGCTGACGATTATAATTAAGGGAGAAATATTGATATCCTGATGCGACC  
GCCGTTATAGCAATTTGAGGATCCTTTATCGAGACGGCTCGATACTGATGATGTAAGAT  
GTTCACTTTGCACGCGAGTTGCAATCATGTATCTTCATTAACCACGCATCTAAATTAGTA  
GGGTAAATGAAATTGCGGATACCGACATACGACGCATCTCTATCTAGTAGTAACGTTTCAT  
CGTGTTGAGAAATTTTACGTATATGAGTAGATCTATTTCCACTAATTTTGGTATACAGATT  
AATTATCTATAATTCGTATCGAAAGACGATTTATTTCGAGTTATTAATAAAATAAGAGAAA  
AATAAGAGAGTTTCTTTAGATTTTATAGATGTCTTTTATTATTTCGTAACAGAAGCAAA  
GACTATTTCTTAACTTCCTCTTCTCGAATTAATTTGACTTTTTCTTTGAACTACGAAT  
CACAACTATTTTCTAATTTAATCTTAATCTTATAAATCTCTATACGAAAGATATATATAT  
ATATTCACAAATCAATTCGTTTTGTTACGAGCACACCATCGACCATCGACGTCCAAATC  
CACGTTTCAGTAACTTCGATTCTGGAATGACTCAAACCTTCGCCAATTGCTCCCGTATCTC  
CTCCCCCTCTCCAAGTTACTCCCCATTAATTGTCTCTGCCGTTTGCTGGCTGGTCGATT  
CCAGCCAACGAGATCCATCACTGCGAATCGTTTGATCTTTACCCGATCAATCTTCCCCA  
GGATCTTCCACAAAACGCGGTACCCGTCTGTACAAACATCCATTACAGCTGTTTCACCG  
TGATCCCGGGTAAAAGATCCTCCCTCGAAAGGACTGGAGGTGCACTCGTTAGACGAG  
AAATTCCTCTGTACACAAGATCGAGAGGCGTACGAATAACTTCTCCTCCATCTGCAAAG  
CCACTCTTGCGGGGAGGCGTTGCGGGGGTGAATCTTGCCTCGAGAATCGAACTTACG  
ATGTGATCCACGAGATCAGACGTGTGATCGACATCAGTCTCTCTTCGAGCTCTTTCGAT  
GAAATTAGTTGTATTGTCGTAGCTTTCATCCTTTTTTTGATCTATTTGAAAATCCTCGAGT  
ATGTTCTACGTTTCATTCATCGATTTTAAAGATCTTATTCCAGAGTGATTGGTGTAAGA  
ATTCTATTCTAATCGTTTTATATTAATGTTTCGTTTAGATAATAAGAGGAGAGCCAAAGTA  
TCGTGTAAATCTTTGATAGATTGTTTTTTAATTTTATCAATATTTGATAGCTATTTTTTTTAT  
TTTTTATTTCTTTTTAGATTACAATAATAAACAGATATGCTTTGTGAATTAACAGATCTTA

TCCAGATAAATATATCTGAATTTTGTTAAGACACATGACATATCAGATTCCCTAGATATAT  
ACACGCGTTTAAATTTTGATGTATCAAGCTTTTCCATCTGACCATGGAATTCAGAATTCG  
ATTGGAAATTAATTATAATTCACCATGAAAAATTTCTGAAGAAGGCTTGTATATATTATA  
TGCAAATACTCTTGGTCTTAACAATAAAAAGTACGAGTCATAAGAGCAATTGAAAGAGA  
AGGAAATTCACAAATGGGTTCTGAGCAATTCGATCTTCGACGAGAGACTCGATTTTCAG  
ACAATTGAAAGGATAAGTAGCATCGCGTAGCATCTCAGCACACAAGATCGTTTAACC  
TTTTTAGAAAGTTAATGGCACGCGAAGAAAAGGAATTCTCCAGCGTTAAGATTGTCAT  
GCGATCGGCCCCTTTTCGATCTCGATCCGTTCTCCGGGAGAAATCGGTTTCGAGCGCAT  
AGAAACCGCATCAGGATGGACACGACAGCTTATGGTTATGTCTAAAGTTAGATTACTTT  
CGCGTGACGTATGACTAAAAATTATAGCAACGATCGAGAAGGCAGCATGTTTCTTTCTT  
TGGGATATTTATCGAAATCACGATGGAATCTTTAACAATCCTTTAACTTTTTATCCCGGA  
AATCGAGGAAATTATTATTTTTATTAATCTCTAATTAATCATTAAATTTCTTTGTATTTCTAT  
AATAACAAAAATGGGTAAATTTAATGAAATAATTTTTGCAAAAAGATTATATGATACAG  
ATAAATAGTTTAATTTAAGTTTTGCCTTATAGAATATAATAATTTAATTATTTCTGTCTTT  
TTCCTGCTTTATAAAAAATTAATTGATCGATCTTGCAACTGGATGAAATCATGATAACGA  
GACCGTGTATCTAATACTTATTTTATTACATCTCTGGGGAATTCATCAGTATAAGATCTCC  
TTCGATTTTAACGATCAAATAGAGAGAAGTGCAACCGTGGTAATTGAACCAGCTCGTG  
GCTAGCTTCCGTTACCGTAACTACCGCTTATTTGAACTCTATATATAAATTTACAACC  
AATCCTCTTAAATAAAATTGAAAATAATTATAGAACGTAAAATTGTAAAGATATTTATACA  
TATTATATTCTATACAAATTCTAATGAAAAAGAAAAAGACATATTATAAATAACAATTTT  
AAAATTGTAAACAATTCATTTAAACCTCGTCATCTGTTTCGCAATAAATATTAATTAAAGA  
ATTAAATAAATTTAATAATAAATTTACACGATCGTATAGCACAAGAATGTTTCCATTAC  
GCTTTGTTGACATTTCTCCGATTTAATATTTAATCCTCTTAAATTTCCATACAATACAGAC  
AGTCGATTATTTGTTTACTTTTTCTTTTACC GCGCGACACGCGACGAGGCAAATGAACG  
TGTATATATATATATAAATATACAGAAGCTCGTAAATTTTCATAACCCAAGGAATAAAG  
ACGGTTTCAGTGAGCAGGTAGCTACGAACGGAGACGGTCGCTCCCCAGTTTTTCGCTTT  
GAAGCGTAATCGCGTCACTTAAACGTGTTTCAGACTTTTTTAAATAATTATTCCTCGTGGA  
TCCCTCGTCGCGTCCGGACTTCTTTCCACCTCTTCTTCCTTTCTCTCTCTCTCTCCCTT  
TTCCTCTCTCACGACTTGGATACGTTAATTTAACTTCTAATTTTCTAACTTTTCTTTTTTT  
TTTTTTTACCTCTAATTTAGCCGTCGTTTCCCTCCCGACTCGGTTGAAAAATTTCCATCTTT  
CCCGTTCCGTTGGTTACACGTGTACGAAAGTGTGAACGAAGCTTTCCGGAAACGGAC  
GAGAAATGGACACCCGAGTGACTTCCGAGTTTCCGAGCAGGGTGAAAAGAAAAACA  
ACGGGAGGAGAGTTTAAAGAG

>novel\_circ\_000595

CAAGAGAAAGAGCAGCGCATCCGACGAGAAGAATGTGGAAAATTATTCCGAGGATTT  
GGTCGAAACGAACGAGGAATCGGGGAAAGGTCACAAGTCGAGGAACAAGAAATTGA  
AGGAGAAGGAGAATATCGACATTAAGGGCAAGTCTAGCTACGAATCCCCGAAGAGGA  
AGTC

>novel\_circ\_000596

GTATTACGTTTCGTGAAACTACGCATTCTACGCAGAGCTATTGAATGTTTACGATGTCTTA  
CGGTTTACGACGAAACGCGAGAAACACAAGCATGGTGAAATGTTAAATTCCAGAAGTT  
CGTTTCCACCATCCCCCTCTTCGCTTTCACCATCTCTTCATCTTCAACATCTTCCTCTGTAT

TCCTTTTCTCGATGACGCGAAGTCGTTTCGACGTTTGAAGGCACATGGAAAAAGTGGA  
AGGGACGAAAGGACGAGTTGGGAATTATTAGAACGAATTATTCAAACGGCGGCGTGG  
AACAGGTGGAGCTTATTGCCGGAACACGGCCACATGGCGTCTCGTTACGATGCGTTTG  
TGGGATCGACGGCCTCACCTGGAGCCACGCACAGGAGGAGAGAACAAGCGTGGGCTA  
ACGAGGGATGGAAAATCTGCGGGGGGTGCGGTGGATGTAACAACGAAAAGAAAAATT  
ACATGGCGTAATTTTCTCGCACTGCTACACTGGAAATTGAAATGACGCCGATTCACTCG  
GGCGAAAAAGTTTTCTAAGTGATTCTGGTCCTCGGTTTCATGCGCGTCGACAATTCGGTA  
TTCATTCGAGCGAATGTTTAAAGTGGACGGAATCAAGAAAACCACTCGATGTAAATTG  
TGATGCGCATGAACGCTATTCTAGATACTCAAAGTGACTTATATATATATACATATTTCA  
TTGTTGAATATTTTTTATTATTATATCAACAATGATTTTTTATAAGTTGCCAAGAGAATGA  
ATTGATACAAGAATGGAACATTTTATTTCTATTATCTCTATTATAGGTAATGCATTAATAAT  
TTTTTGTTACGAGTCGATATATAAGAATCAAAGGACTTCAATGTGTAATCAAAAATATCT  
GCGACACGATGAAAATAAATCCGTTTCGTGGATTAAAAAATTGGTGAGAAGGAAACCT  
CATCGAAATCCTACAATAGATGGTACCAGCTTTCGCAATAGAGCAACTCTTTTTCCAGA  
AACTCGAAAATCCAACGTGAAACCAATCAAACGTTACGTGACCAGGAACCCGCGAAA  
CGCACGACTCTCGAACATGGTCTCGAGTGGCACTGTCTCGTCACGAGTTTCGAGGAAG  
CAAGCGGGGATAAGGAGGGGGCGAGACATTTTGAGCGTACTCCCCTAGGAGCCTCGA  
GTCGTTTCATCCGGAATACCATTCTCTCTCTCTCGTTGAAAGAGAAGACGAGACGAGA  
GATAATTAATTGTTTCGAGGCAGAAAGTAAAATTCCTTAAATCATCGAGCCAAAAAAT  
TATCCATTATTCCTTAAGTCCTTTGTGATAGATCTAGCTCTGTGTCTTGCTTCCTCCGTT  
GATTTTCGATTCTCGTGTCCCAACACTCTCTGCCATCTCGACTTATCCCTCTACGAACCTT  
CGAGAGGAACGTGACGAACCTGTCATTTTCGACGTTGAACTCTTCACGGGGAAACGT  
GTAAGATGATCCTCGACTCGACGAGGGGGAACAACGAATATATATATACGAAAAACG  
AAGCGTTGTTAATTGGAATACGATACCGTCGAAAGGAAATCGAACGGGGGAGATGAGA  
AATGAAAGGAATCGATCAAGGTTAACAGGATTGGAGAATGGCGGACAAGGAGAGCGA  
ACAGCGCGATCTAATCTTGGGATAA

>novel\_circ\_000597

GTCAGCCAAGGGGCCCCGTGTCCCAAGGGTGGGTGTGCCGGATGCTGACCTTCTTGCA  
CAATGGCTGAGGCTGCACCATCAGCGGATATGATTTGAAGGGATCAATCGGAGGCGCG  
GTCGGGCATCCTAGAACGGTATATAAAGTCGGATCAAATGGTTCGTGGGCACACTCAG  
CAATCGGTCGATGAGGAAGATGAAGGCCCTCGTGATCCTGCTAGCTTTTCTCGTCTTG  
TCGCAGCTGCGCCCCGTCAGCGTCGCGATGCTATTTGGAGTGGATATCACGGTGGCTAC  
GGTGGTCACCTTGGATACGCTCACGGCGTGGCGGTGCTGGTCCAGCCTTGGGACCGG  
CCAGCGTAGCCGGTCCTCACATCGGATCCACCATGGTGGCAGCGCCGTCCATAGGACC  
GGCTAAGCTGTCCGGATCAGTTGCTGGGCGGTGCACGTTTCCGGTGCTGTGGCCGGC  
TCTGCCGTTGTCACTGCTTCCGTTGCCGGACCCGCTCACGTTGAGGGCTACGATGCTG  
GTCCCTACGATGGAGGAGTCGGTGTGCGATACGCGGGCCCGGCCTACAGTTACGCGGG  
ATACCCGACATTCGCGGGAGTTGGCAGCCACGGAGCGGTGATAGCGGGTCCAGCGTCT  
CACGGTGCGATTCTCGCGGGGCGGCGTCCCATGGTGCCGTGCTCTCCGGACCTCATT  
CGGGAACCGCGGCGGTATCCGGTCCCCACGCTGGATCGGTGGTGATCGCCGGCCCCCTC  
CGGCAAAATCACTGCCCACGGGACAGGTTACGGAGCGATCCACTCTGGCCACTCTGGC  
CATTGGTAACGAGTCCTGTTGGATGAGACAGAAGGAAAGGAAGAAAATCAGGAGAAT  
AAAATCTCGTCGATCGAAGCGTCCAGTCAAGGTATCGATGTGTTGTCCGATCCGTTGTT

TAGATTTGTTTCGCGACGATCCCTCTTTTAACGAATATCACGATTTTTGTATGCATGGTC  
GGTTTTTATACGGTTATATTTTATTATTATTGTTATTATTATTTTCTAAAAAAGGAATAGA  
TAATAAATAGTTTGTAACGTACATTTTCATAGATATAATATACATATATATATTCGTATAGCG  
TAACTTTAATTCTGATCTCGTATAATAATACACGCGATTTAGTTACACACGTTTAATCGCG  
TTGTAACTCTTCCACGCTTCTATAGTTTAATCGAGTTTATATATATACACGGCTTAAAC  
CTTTAGTTTCGCTTTAAATTCGTTACTCGTCCCGTTTTAACGAGCTGTAAAATAATTGATG  
CACGTTTTAAGAGTAAAGAGAGAGAGAAAGATCGTATCCCGTGAATTTTGAATCTATTTTC  
TATTTTGAATATCGATTACGGGTATTTTTTTCATCGACTAAAAAGGAAAGGGAAAAATTA  
AAAACTTTCTCGAATAGGAGATTTAATATATATATATAGATCATGCTACTATACAGGCAGA  
TCACGAAAACGTTTTACGTTTTATCGGTTCTCGATCCTTATCGCCGTGTCGGTTCGCGTG  
TGTTTCACCGTGGAATTTGACACTTACAAGAAGCGACGATTAAGGGTAGATTGAGAA  
AGAGAGAGATAATACAAAGTGCTGAAGATCTCGAAGTGTCAGCAAACGATACGAACG  
ATAGTGGAACAATAAAATCCAACTACTCTTCAGCCTCGAATTCTTCTTTTTAACTC  
AACGAGTATATCCTCTTTATATTGTCAAAATTTTCGTATATACAGAGGATTGTTTTCTCAT  
TATTGTCAACTTAAATTCTGATTAATTCTGATCAAGAACGTTGTCGAATTAAATTTCAA  
GTTCTACCTGTATAAATCGCTGGTGCAACGAGCCGGGTTCACTCAGCCTCTTAGCGTAT  
TGCGCGTAACATATCATTGGCCGTAGTAAAGGGTAAGGTCGCTAGACGTGTGGCTCGC  
GACACGGTCTGGCAATCGTGAAACAAACAACGAGTCGGATTTTCGCGACATTGTCCGG  
GGAAAAATCGATCTGTAGATCGATCCGCGGGCACACAGGTGTGCGGGGGCGCGGTCTGA  
TTTGAATAAGGTTCGAGCTAACGAACCGCGAGACCATAATTCACAGAAGGTTCGTACACG  
AGAATTGCGTTATCTACGGCGGTTGTTGCACTGCGCTGGCTCTATCGCGTTGAATCTATA  
CACGACAATTACCGTATGCTTTTTTCTTTTCTTTCTATTTTTTCCCCCTTTTTTTTTTTT  
TTTTTTCAAAGGCCGATCTTCGCCACAGATCGCGCGACCATGGGAGGGAATTTTTTCG  
CCTAGCCAAGCCGTTTTATTACGTTTTTACGACGAAACAATGGCCATTCAAGTTGTTTG  
CTTCGAGGCTACCAGGCTCTGTGGAACGCACGGAGGCATTTACGTTATATAAACGATCG  
TTTGAATCCCGGTGAAATTCACCCGATGGATCCATTTGATAATTCGTGTTTGAAAGTTT  
AATCCACGAAGAGGGAGGAAAGATTAGGAGTAACGTTTGATCGCAATTTACATTTCTA  
CATTTTAAGAGGGAAGGATACGATGATAAAATATTACGAGTCGATGATTTTGATTAAATT  
GATCGATCAAAATCACGATAGATTAGAAGGAACAGAATACAGAAGCACGCCATCGTGA  
TTCTTAACGTAAAGAACTCGATGTAAACCAGATCTGACGACGGATGGAAGATTTATTC  
GCGAGAGTAGATTCACGAGAGAACATCGTGAGAACGAGACCGATTTAACTACTAGCC  
AGCCTTCATCTTCTATTCTTTGAGAAGATTATTATCGGAATCTCGAGGCATTTTCGCGA  
TGGCTAGGACGAATATCGAACGACTTGGCCTTCTTTATGGGAAAATCGTTGTGCCGCGT  
CACAATCAATTTTCGTCATCGATCAACAGTCGCATCGAATTCTCGAAAAGGTCATTTCTGA  
TTTCAATTTAACCAGGTTAAATGGTTAGCACGCAACAACGATTTACAATATTCAACCGA  
TTTGTTTTTTTTTTTTTTTAATGGATCAAATAAAAATGAAGCTCTCGGCTATCCATCACGT  
TGATTCACGATCGAGTAGTCGTTGCTCCTCGGCTCATGGAAAATAGATCCAGGTCGTG  
AATCGTGGAATTGTAATCTTTGAAAGAGAGAGAGAGAGAGAGAGGATTTTACGAATCGAA  
CGTGAATTATTTCCACCCCCTCCACTCGGTTTCTTTTTCCCTCCTTTTAATTTTAAACGA  
TGGTAAATACGAATGAAACGAATGAAAGTGCGGCGGGGTTGATATTAAATATTTTATTTT  
CTCGCGGTTCTCGTTAACTATTGTACGCGATGAATTTCCCCCTCCGAGATGTGTAAATT  
GAAAATGATGCTCACAAGAGAATAATTTTTTTTTTCTTCTTCTTTTCATTTTGCACC  
GGGATCACTTCATCGCATCAAAACGCGTGTATGTATGTGAGTGTGTGTTAAATTACGC  
AGGAAAATGGATTATTTATCGCAAATTTACATTTCTCTCTCGCACAATGCCAGTGGAAT

TAAAGAAGTGGGTAAGCGATGTGCCCTAATTTTAACTTCGATACGAGCAACGTTAGC  
AGTTATTCATTGCCCCCCCATACTTCACGTAAAATCGTAAACGTTGAATTACGAATGG  
GAGAAATATGGGCGAAGACGATGTTTACGACTTCAATAAATTATTATTGCGCTTG  
AACGTAATCTATTTTAAACGTCGTGCCTTGCAATTTCTCGCCGTATAAAATCCGCGCCGT  
CGAATTCTTGGGGGAGGAGGGGCAAAGCAAAATTTCTAACTTCGTTTCTTTTTTGTCTC  
GATCGAAATAATAAATATATCGCTTTAAAGGAGTGGATAGTTTGTACGATAAACTCGGT  
ATTCGTTTCAAGTTTTTGAATTATATTTATCTAGAAAAGATCCTAATAAAGGGAATGGAAC  
AACGACCCACAATATCCCCAATTTCTTTCTATATTTGTAGAATCAAATGCCGCAATACG  
AAACGTCACGTCGTCTCATAAATAATTCTGGTCAGATATCTAAGAAGGTTTTCAACGGG  
AATTGAATCTAAAACAATAGGGCACGTAACGATGGGGATTTTATGGAGGAGAGAAATT  
GAACACCGAACATGAAAACGGGAATAAGTGCCATGATAAATCTAAGAATAGACTTCCC  
CCTCCCTCTCCCTCTTTCCTCTTCTATTTTTATTATTAGATCGATCGGAAAAGTTTTCCC  
TACTAACGAGAATTTTCGCCATAATGGAACAATATAAAAATCTTCTCCCTTCTTCGATGA  
TGAAAGAATCATTTATTATAAAAAAACTTTATACATAACAACGATCCTCTCTATATGATAAA  
ATATACATTATTGCTTAATGACTGAATGAATAGAAAATTTCACTTTACATGATAATTTTTA  
ACCAATAACGTTTATTATAAATAAAATTTAAACAAATTTTTAAAATCCTTTCCCAATCCC  
ACTCTCTCTCTCTCTCTTTCTTTCTCGTCATTCCTCAACGATCGGCTAGATGGCGATA  
AATCATATACTTTGTACGAATTGCAAGCCGCCACATATCTATGATCCATGCTACGAGG  
TAACCGAACCTTAACGAGAGATCCGGATTGTTTTCGCGAGGTGTCGCGTCGTCAAGGG  
ACGAAGAGAAAGAAGGTGTGGCCGATAACGAGGTAGATACGGTTGTCTGTTTATAACG  
GGTTGGCGGAGATCGAGGAAGGCCGATCGATGAATCCTTCGACGCGCTGCTCCTTCCA  
CATCCATTGAATCGCCTATGGAATACAAAAATCATAGCAAGTGGCCAAGGAGAGGAGA  
GAAGAAATGTTCTGTTAGAGGAAAGAAAGAAAGAAAGAAAGAAATCGACGTC  
TTTGTATGAACGACGCGTAGACACGCAGGGATCACGACGTGATCGTAGATCCTTGTTA  
AACATCTAGCTCGAGACACGATCTCGCGGTGGATCGTTGGTCGAGAGGGCGGGGAAAT  
AACCGGTTATTTTTCAACGAAGCCTTATTTATAAGGTTTTGGTAACGTAACGCCGCGTTC  
GCAGATCAGAAAATCGGTCCAGGAACGGGAGGATAAATCTTGCGCGCATGCCGCGTCC  
TCTCTCTCTATCTCTCTCTCTCTCTCTGCTCGATCGTTATTCACACCCCGATCCGCTC  
GACCGATGCACCACCGTCGTGGAAATTGAGAAACGTGGCCGTTTTGTACGCGTCACAG  
TCTAATTCTTTCGTTTGAAACGAATGGAAGGAGAGAGGGAGGAAAGAAGGAAGAGAC  
ATTCTCGGATCTCTCCGACAACCTGTTCCAAAGTTGCGCATGATAAATATTAGGGAATTG  
TGGGGGAGAAAACTTGGAATTTCCGGATAATATTTAGGATATTATACGTAAGAATTT  
GGAAATCTTGGGATCTTCAATTTTATCAAAAATCACTCGTTCTCAACTCGCTATAAAT  
ATTCGACAAAAGTTGGGGAATTCGCGATTTCGAGTTGTTGAAAATCTTGGAATCCCATT  
TATATTTCCCCTCCCCGGATTTAACAAACGATTTCTGCCTCTAGCGAACGTTAAACTCGT  
TGGCCGACTTACCTGAAAGTTGGACGAGGCGGGCTGGTGTGACGCTATTGGAACGA  
AGGATCGTGGCTCGTCCGTTTCGGGGTTGGTCCGGCGGCCTCCTCGGGGGATAGGAAG  
GCCAATTTTTTTTCGAGAATCTCGACGATCCATCGATCACGCCAGTTTCTCGGCTTCTCTA  
TCCGGTGGAGATAGGTGGACAACGTAGGTGACACGTCCCCCTGTGGACGAGTGAGGC  
CGACGAGATTCCGAGCAGCGACTTTCCATCGGCCATCACGGAGGAACATTGGCGTGCA  
AGTTGATG

>novel\_circ\_000598

CGTGTCAACAGGTCAAATACGGCGTGCAGGCGGTATTCTGGGCCATCGGATCCCATTCT

GGGGCAACACATCCACAGCATCTGCGACGCACTGGATATTCCACATTTGGAAGCCAGG  
CTGGACCTGGACACGGAGGCGAAAGAGTTCAGCATCAACCTCTATCCCGCACAAAGTT  
TGCTCAACGCCGCTTATCAGGATATCATGGAGTTTCTCAACTGGACCAAGGTCGCCATT  
ATCTACGAGGACGATTATGGATTGGTGAAGCTGCGAGAACTGGTCAGGTCGCCGAAAT  
CTCAGGAGATGGAGGTAAACCTCAGGCAGGCAGATCCAGATTCCTACAGGCAAGTTCT  
ATCCGAGATGAAAAGCAAGGAAATACGGAATCTCATCGTGGATACGAGGCCAGAGCAT  
ATGCATCATTTTCTACGAATGATACTGCAACTGCAAATGAACGACTACAAGTACCACTA  
TCTCTTCACAACTTTTCGATATCGAGACGTTTCGACCTCGAGGACTTCAAGTACAATTCG  
TCAATATCACTGCCTTCCGTCTGGTCGACGCGGAGGACGTCGGTGTGCGGGGTATCCT  
GAGGGACATGGAGCGATATCAGCCGTCCGGGAATACGATTCTCAACAAATCGAGAGTT  
ATACAG

>novel\_circ\_000599

GATTGGTGAAGCTGCGAGAACTGGTCAGGTCGCCGAAATCTCAGGAGATGGAGGTAA  
ACCTCAGGCAGGCAGATCCAGATTCCTACAGGCAAGTTCTATCCGAGATGAAAAGCAA  
GGAAATACGGAATCTCATCGTGGATACGAGGCCAGAGCATATGCATCATTTTCTACGAA  
TGATACTGCAACTGCAAATGAACGACTACAAGTACCACTATCTCTTCACAACTTTCGAT  
ATCGAGACGTTTCGACCTCGAGGACTTCAAGTACAATTCGTCAATATCACTGCCTTCCG  
TCTGGTCGACGCGGAGGACGTCGGTGTGCGGGGTATCCTGAGGGACATGGAGCGATAT  
CAGCCGTCCGGGAATACGATTCTCAACAAATCGAGAGTTATACAG

>novel\_circ\_000601

GCTGCTGGTAGACATCAATGCAGCTATTTAATAAACCTGCAGAAAGGAGAGTTCATCCT  
CCAAGGCGGTGATCCATCTTGGCTTCGTGGTTTGAAGTCGATCCCTGGAAAGCTACAA  
GATCTCTATGAGATTAACAAGATTTTAGCTCATAGGCCGTGGTTGCTGAACAAAACGCA  
CATAGAGAACTGACCAAAGGCGCGGACAGTTGGTCCTTGGCCGAGGTCGTTACGC  
GATAGTTCTTCTGGCCCACTTCCACTCCCTTTTCGTCTTTTCGTCTTTTCCTGCGGTATTAA  
CGAAGAGCTGGACAACGTAGCCGGTCACCATTACAAAGAGAACGTCCAGGATAATAG  
CAATAACGTACCAACTGCCAAAGACAAACTTTCCAGTAGTCCCAAGAAGATCCCCAAC  
GGCGACGGCAAGACTGAAAACATGCCATCGCCGCCATCCTCGCCGAGCATAGTAGGTG  
AACAGGAGGTCGGCGTGGAGGCGCTCATGGAACGTATGAAGCGGCTTTCCGAGAAGT  
CGGAGTCGTACCAGATCACGCAAGAGGAATTGTCCAAGAGATTTCGAGACAGTGGAGA  
CCCAGTCCGCCGAGTTGGCAGCCGCGCCCCAGAGGAGTAGTTTCGGTCCTCGACTCTGA  
CATCGGTCATTTTCATCGAAGATCCTACGTTTCATCTATCAGGATTCGCCAAG

>novel\_circ\_000602

GCTGCTGGTAGACATCAATGCAGCTATTTAATAAACCTGCAGAAAGGAGAGTTCATCCT  
CCAAGGCGGTGATCCATCTTGGCTTCGTGGTTTGAAGTCGATCCCTGGAAAGCTACAA  
GATCTCTATGAGATTAACAAGATTTTAGCTCATAGGCCGTGGTTGCTGAACAAAACGCA  
CATAGAGAACTGACCAAAGGCGCGGACAGTTGGTCCTTGGCCGAGGTCGTTACGC  
GATAGTTCTTCTGGCCCACTTCCACTCCCTTTTCGTCTTTTCGTCTTTTCCTGCGGTATTAA  
CGAAGAGCTGGACAACGTAGCCGGTCACCATTACAAAGAGAACGTCCAGGATAATAG  
CAATAACGTACCAACTGCCAAAGACAAACTTTCCAGTAGTCCCAAGAAGATCCCCAAC  
GGCGACGGCAAGACTG

>novel\_circ\_000604

ACTCATATCCTGTTGATGGATGCGTTCCTCCAGAACAACAGGCTGGATCATGTCTCCAG  
GGTGATGGCCTCGCATCCCTCGTACTTGGAGCATTTTCTCCGCACCCAACATTTTCATCCT  
GAGGGGTGACGGACCACTTCCTTACGACTACAGGCATCTCATCGCCATTATGGTGAGTA  
GAACGCTGCTTTTTCTTCTCCTCACCTAATTCGACGTAATGGTGGCAACTTTTTTTCT  
TCTTCTTTTCTTCTAATCCGGCGATACGATAACACCATCTGGGAGAGACTGGTGAAAA  
GCATTTCTCATACCGACTTGAAGATTTTATCCTGTTTTCTTTTTTTCTTCCAAAAGGA  
AGGAAGG

>novel\_circ\_000605

GTGCAGCAGCCAATCTACGCAAGGAGGTTATCAGAAACAAGATCAGAGCCATTGGCA  
AAATGGCGCGCGTCTTCTCCGTCCTGAGAGAGGAAAGCGAGAGTGTGTTACAATTGAA  
GGGCCTCACGCCCACTGGAGCTTTGCCTCTTGGTGC GTTATCGGGTGGCAAAACGTCG  
CTAAAAACGCTCTCCAAGGTTTCTCGCCGAACCACAAAATCACTTCGTTTCGCCGAGG  
CGAAGGGTCTGGACGCTATAAACGAAAGGATGCCGCCAAGAAAGGACGCCCCACCCA  
CGCCAGTGACCGAAGAGAAGCCTGTGATAAAGCCGCCGGCTTTGGCAGAGAAGCGAG  
AGCCATGCACACCGCAACCGCAATCGTGAGCCTCACACTCGTCCAATCAAG

>novel\_circ\_000606

TTACGCGGCGTGCTGCGATTTCCTGCAGAACAACTTGCTGAGCATCATTAGGGCG  
CACGAGGCACAGGACGCGGGTTATCGCATGTACCGGAAATCTCAGACGACGGGCTTCC  
CATCGCTAATCACCATCTTCAAGTGCGCCCAACTACCTCGACGTTTATAACAACAAGGCG  
GCAGTGCTGAAGTACGAGAACAACGTGATGAACATCAGGCAATTCAACTGTTACCTC  
ATCCTTATTGGTTGCCCAACTTCATGGACGTGTTACGTGGTCCCTGCCGTTTGTAGGT  
GAAAAAGTGACAGAGATGCTGGTGAACGTGCTCAACATATGCTCGGACGACGAGCTG  
ATGAGCGACGGAGACGACGGGCTCGAAGAAG

>novel\_circ\_000607

TGCGTATTGTACCTGTGGGCACTTAAGCTGTGCCATCCAACCACACTGTTCCCTCCTCAG  
AGGCAATCACGAGTGCCGTCATCTCACGGAATACTTCACATTAAAGCAAGAATGTAAAA  
TAAATACTCGGAGAGGGTGTACGACGCTTGCATGGACGCGTTCGACTGTCTGCCGCT  
GGCGGCTCTCATGAACCAACAGTTCCTCTGCGTGCACGGTGGACTCTCGCCGGAAATT  
CACAATCTAGAAGACATACGCAAA

>novel\_circ\_000608

TGTGCGGCGACATTCACGGACAGTTCTACGACCTGATGAAGTTATTCGAAGTGGGCGG  
ATCACCTCCACGACAAAGTATCTCTTCCTCGGCGATTATGTAGACAGGGGTTATTTCA  
GTATCGAGTGCGTATTGTACCTGTGGGCACTTAAGCTGTGCCATCCAACCACACTGTTT  
CTCCTCAGAGGCAATCACGAGTGCCGTCATCTCACGGAATACTTCACATTAAAGCAAG  
AATGTAAAATAAAATACTCGGAGAGGGTGTACGACGCTTGCATGGACGCGTTCGACTG  
TCTGCCGCTGGCGGCTCTCATGAACCAACAGTTCCTCTGCGTGCACGGTGGACTCTCG  
CCGGAATTCACAATCTAGAAGACATACGCAAA

>novel\_circ\_000609

GGTGTGAAACCCCCTGGTGGCGGAAGCAGCGACATTTTCGGCGCGGGCGCCCGAAGA  
GACTAGCCCCCGCCGCGTGAAGAACCACAACCAATCGCAGCTGGGCTCCGCTTTGTTC  
GGCGATACAGCACCGAACAACAGCAACAGCAACGAAACGCCGCGCAACAAGCCCGG  
TAATGATTCATACAATCGCCTGTTTGGCCCTCCCGATGCCCCACCCACCACCCCAAACG  
CGAAAAATCACATGCGCAGCAATATCTCCCTCAGCGGGGAGTCGATGTCTCGTCGGT  
GTCGTGCGGGCGCCGCAACGTCGCCCCGCAAGAGCACCGGAAGCTCGGACTCGATCGC  
GGGCGTTCTCAACGGATACGCGGCCAGCAATGGCAACAATATGACCAACGATGTCACA  
G

>novel\_circ\_000611

GTGGTGTAGCTCTGTGTTTAAGTCCTATGGGAAGACGTAACGGAGAAGCATTAGTACG  
GTTTGTTAATAAAGAACACAGAGACATGGCATTAAAAAGGCATAAACATCATATGGGTG  
GAAGATATATAGAAGTATATAAGGCATCTGGAGAGGATTTTGTGTTGGTGTAGCTGGTGGA  
ACTA

>novel\_circ\_000612

AAATTGCAAAAGTACGAGCAAGTCTTTTTTCAGATCAGTGGCGTCAAAAAAGAACCACT  
GGTCTTGCCAGAACCAGAGGGTGAAGTCACAACACTTATGGAAAAAGTTTATGTACCT  
GTCAAAGAACATCCAGATTTTAATTTTGTGGAAGAATCCTTGACCACGAGGAATGA  
CAGCCAAACAATTGGAACAAGAAACAGGATGTAAAATTATGGTTCGGGGAAAAGGGT  
CTATGAGGGATAAAAAGAAGGAAGAGTTAAACCGAGGTAAACCAAACCTGGGAACATC  
TGACAGATGAATTGCATGTTTTATTGACAGTCGAGGATACTGAAAATCGTGCCACTTTG  
AAGCTTGCCAGAGCTGTAGAAGAAGTCAAGAAACTCCTTGTTCCCGTGCAGGCTGATG  
GAGAGGATGAGCTAAAGAAACGGCAATTAATGGAACCTTGCTATTATCAACGGTACTTAC  
CGAGATTCTAATACAAAAGTTGCAGCAGCTACAGCTTGCGATGAAGAATGGAGACGTG  
TTGCAGCGGCTGCGGCAGAAACGCAGCGACTTCTTCCAGGCTTAGCCACACCTATGAG  
GACGCCCAGTGCTCCATTGGGAGCACCGTTAATACTCTCGCCACGGATATCTGTTCCAA  
CAACCGCAGCGTCTCTTTTAAACGGTTCCGGCCCCACCAGGATCGCTTCTTTCTGCCGGT  
GATCCGCATGGTTTAATTTACACACCATATGCTGATTACGCCAACTACGCAGCCTTAGCA  
GCATCGCCTCTTCTCACGGATTACACAGCAGCTGATCATTCTGGTGGGTGTTTGCACG  
CTGATCTTAGTTGCAACAACGTTTTTTCATGAATATTTCTTCGATTGTTGTTGTTATTATT  
ATTATTATTATTATTATTATTATTATCATCATTATTATTATTGTGCAGCAGCCGCTGC  
GAAACAACGTAGGCACCTGGGTCAGATTTCGCGAGCACCTTATCAAAGGGCTGGTGCT  
TTGTTCGTGAATCCGGAGAGCGCAATCGCAATACTGTACGCGCCTCCGCGAAAAG

>novel\_circ\_000613

AAATTGCAAAAGTACGAGCAAGTCTTTTTTCAGATCAGTGGCGTCAAAAAAGAACCACT  
GGTCTTGCCAGAACCAGAGGGTGAAGTCACAACACTTATGGAAAAAGTTTATGTACCT  
GTCAAAGAACATCCAGATTTTAATTTTGTGGAAGAATCCTTGACCACGAGGAATGA  
CAGCCAAACAATTGGAACAAGAAACAGGATGTAAAATTATGGTTCGGGGAAAAGGGT  
CTATGAGGGATAAAAAGAAGGAAGAGTTAAACCGAGGTAAACCAAACCTGGGAACATC  
TGACAGATGAATTGCATGTTTTATTGACAGTCGAGGATACTGAAAATCGTGCCACTTTG  
AAGCTTGCCAGAGCTGTAGAAGAAGTCAAGAAACTCCTTGTTCCCGTGCAGGCTGATG



GAGAGGATGAGCTAAAGAAACGGCAATTAATGGAACCTTGCTATTATCAACGGTACTTAC  
CGAGATTCTAATACAAAAGTTGCAGCAGCTACAGCTTGCGATGAAGAATGGAGACGTG  
TTGCAGCGGCTGCGGCAGAAACGCAGCGACTTCTTCCAGGCTTAGCCACACCTATGAG  
GACGCCCAGTGCTCCATTGGGAGCACCGTTAATACTCTCGCCACGGATATCTGTTCCAA  
CAACCGCAGCGTCTCTTTTAAACGGTTCCGGCCCCACCAGGATCGCTTCTTTCTGCCGGT  
GATCCGCATGGTTTAATTTACACACCATATGCTGATTACGCCAACTACGCAGCCTTAGCA  
GCATCGCCTCTTCTCACGGATTACACAGCAGCTGATCATTCTG

>novel\_circ\_000614

CAAGAAAAACAAAATGAAAAAAAAATCAGAGGAAGTGAAAAAGGAGGAATAGGTA  
AAAGAAAAGAAGGAAAGTTAACGTTTCTTATGAATATAAAATTACTTACGCGATTTG  
ACTGTGCACATCGGTGTGATTTCTTTTCTCTTTTATGTGAAAATAACCGTTAACTTTGA  
CCTGACAACCTGCGATTATGTTTTACTCACCGGT

>novel\_circ\_000615

ATGTTTTTCAGATCAGGTACCCTGGAGCGACTCGAGGCCAGAGAGACGAGAAGCTA  
ACTGGACACATTATTCTTCTTCAAGCAAGGTGTAGAGGTTATCTGGCACGTCGTAAACT  
CAACACTTTGAACTGCAAGATCTTGCAGTTAGATGCATACAAAGGAATGTGAGGAAG  
TGGATGTCCGTAAGAGAATGGCCCTGGTGGAGATTATACGTGAAAGTTGCACCTTTATT  
GAACGTCCATCGAACAGAGGATCAATTGAAGGCAAAGACGGAGGAACTTGAGATTCT  
CAAAACGAAAGTGGAACGATTGGAGCAGGAACGGAATCATCTGAAACACGACAATGA  
TAGATTGGAAGCTAAG

>novel\_circ\_000616

GACGCAAGATTAGAAATCGAATTAAAGGAAGAAAGACTACGGACATTAAGTCAGGAA  
CTTGAAGAATTAACATTTGGCGGGAAAACGGAAGAGGAAGTAGCACAGTTGAAAAAA  
GCGAAGCACGAATTAGAGAAAAGAGTAAAGGATCAAGAAGAAGAGTTGGATGATCTC  
GCTGGTCAAGTGCACTTCTTGAGCAAGCGAACTGAGGCTAGAGATGAGTATCGAG  
CAACAGCGTAAAGAAATACGCAAAGAGATGCAACAAAGAGACGAGGAACTGGAAGA  
TGTGCGAGGTAACGCGTTGAAAAAAGTGAAAGCTTTGGAATCACAGCTGGAACGCA  
ACATGAGGAGAGAACGATATTACTTCGAGAGAAACACGAGTTGGAACGTCGTTTGGTT  
GCTATTGAGGAACAGGATCGTGCTGAACGTGCCGCAGAAGCTGAAACTATGCACAGAT  
TGAAGAGAGACTTGAAAAGAACCAAAGCTTTGCTAAGAGATGCTCAAACAATGCTGG  
AGAGATCAAAGGCGATTCTGACTGGTAAGGCAGCTCTACGACAATTGAAAAATCAATT  
GGAGGATGCAGAATGTGCTAGAGCAACTGCTGTCAAAGCGAAACAAGCATTGGAACA  
AGAACTAAATGAGACACAGGCTTCGCTAGAAGAAGCTCAACGACAACGCTCTGAAGC  
GGAAGAACGGGCAAATATAGCTAGTCGTGAACGAACTGAGCTATTATCACAATTGGAA  
GAAAACGAAGAAGAGTTAGCTGAAGTTTTAAAGAAATATCGGGCAGCAGTGCAGCAA  
GTATCGGCAGAACAGGGTCAATTGCAAGAAGCACAAGTACAGATTGCTGCATTAGAAG  
CGGAAAAGTCTGCGTTAAAGGATCAATTATCAGAATTGACACAACGACTCGAATCCGT  
TGAACAACCTCGGTGATCCAACGCCAACAGCCTTGCTACACGGCGACTCGAGTTCCGT  
GCCAAGGAACTCGAAAGTAAGCTAGAATTGGAACAAACCACGAGAGCACGTTTAGAA  
ACTCAAATAGCGAGATTGAAAGAAAGTGTGGAGAAATTACAACTGAATGTGCACTAC  
TTCGTACGAAAGAACAGAGTGCCCAAGATACTTCCAGAAGATTGCAAAGATCATTACG

GGAAGCAAGAGAAGAGGCCAGTTCAGCTCTAGCGCGTGAACAAGAATCTACCCGTGC  
TCGTCGCGAATTGGAAAAATCTCTTGAGGCTGCTGAAGCAGAACTAAAGTCGCCAG  
AGACGATCTTAGATTGGCGCTTCAAAGAATCGATGATCTGCAAAGCGCTATTCAAGGTG  
AACTCGATTTGGATTGCAGCGAGGAAGGAACAACGGAAAATAGTGATAG

>novel\_circ\_000617

GCGAGCAAGAATTACGGGTGGGCGAGCAGCGGGTGCAGCATCCTGTCCGAAATTGGC  
ACGATGCACCTCGAATTCACCTATTTAAGCGACATCACCGGGAATCCGGTTTTCAAGAG  
CAAGGTCGAGAACGTGAGGAAGGTGCTGAAGAATCTGGAGAAACCGAAGGGGGCTGTA  
TCCAAACTATATTCACCCGAAGACGGGGGAAATGGGGCCAACATCACATGTCGCTGGGA  
GGGCTTGGCGACAGTTTCTACGAGTATCTGCTGAAAGCGTGGATCCAATCCGGCAAGG  
AGGACGTCGAGGCCCGGCAAATGTACGACGAAGCGATCGTGGCCATAGATCAACACAT  
GATCAAGACTTCGCAGGGCAAGCTCCTCTACGTGTCAGACTTGAAATACGACAGGCTG  
GAGCACAAAATGGGTCATCTGGCGTGTTTCGCCGGTGGTATGTTTCGCGTTAGGCGCGA  
AAACATTGCAAAACGAATTGTCCGATAGATACATGACGATAGCCGCCGGTCTCACCAA  
CACGTGCCACGAGTCGTACGATCGAAGTTACACGAACTCGGCCCCGAAGCCTTCCAC  
TTCATCGAGGGGAACGAAGCGAAGAGCTTGAAGAACGGCGAGAAATACTACATCCTT  
CGGCCGGAGACCTTCGAGTCGTACTTCGTGATGTGGCGGCTGACAAAGGATCCCAAGT  
ACCGTGAATGGGGATGGGAGGCCGTTCAAGCTCTCGAGAAATACTGCCGTGTTCCAGG  
GGGGTTCACGGGGCTCCACAATGTTTACCTGGTCGATCCGCCACAGGACGACGTCCAG  
CAGAGCTACTTTTTCGCCGAGACGCTCAAG

>novel\_circ\_000619

AACTCGGAGATATCCCTCTTCGAGACGAACATTCGTTTCATGGGGAGCTTGTTGGCCTG  
TTACGCTCTCACGGGGGACGTGATGTTCCGGGATAAGGCGGCTCAGCTCGGCGAGCGG  
ATGTTGCCCGCTTTCCAGACGGAAACCGGAATTCCTCATTCCCTCATCAATCTGCACAC  
CGGGGCGAGCAAGAATTACGGGTGGGCGAGCAGCGGGTGCAGCATCCTGTCCGAAAT  
TGGCACGATGCACCTCGAATTCACCTATTTAAGCGACATCACCGGGAATCCGGTTTTCA  
AGAGCAAGGTCGAGAACGTGAGGAAGGTGCTGAAGAATCTGGAGAAACCGAAGGGG  
CTGTATCCAACTATATTCACCCGAAGACGGGGAAATGGGGCCAACATCACATGTCGCT  
GGGAGGGCTTGGCGACAGTTTCTACGAGTATCTGCTGAAAGCGTGGATCCAATCCGGC  
AAGGAGGACGTCGAGGCCCGGCAAATGTACGACGAAGCGATCGTGGCCATAGATCAA  
CACATGATCAAGACTTCGCAGGGCAAGCTCCTCTACGTGTCAGACTTGAAATACGACA  
GGCTGGAGCACAAAATGGGTCATCTGGCGTGTTTCGCCG

>novel\_circ\_000620

AACTCGGAGATATCCCTCTTCGAGACGAACATTCGTTTCATGGGGAGCTTGTTGGCCTG  
TTACGCTCTCACGGGGGACGTGATGTTCCGGGATAAGGCGGCTCAGCTCGGCGAGCGG  
ATGTTGCCCGCTTTCCAGACGGAAACCGGAATTCCTCATTCCCTCATCAATCTGCACAC  
CGGGGCGAGCAAGAATTACGGGTGGGCGAGCAGCGGGTGCAGCATCCTGTCCGAAAT  
TGGCACGATGCACCTCGAATTCACCTATTTAAGCGACATCACCGGGAATCCGGTTTTCA  
AGAGCAAGGTCGAGAACGTGAGGAAGGTGCTGAAGAATCTGGAGAAACCGAAGGGG  
CTGTATCCAACTATATTCACCCGAAGACGGGGAAATGGGGCCAAC

>novel\_circ\_000621

CTGACGAGAATTCCGAGTCGATGAGATCGAAGCAAAGGGACGCGAGCTGAAAACGCG  
CGGCCGCCGTCGTTGAAGGCTACTTAAAACGACCATTGAGCACTCGTCGGGGTGCTCG  
AATTACCTACAACAGGTGGCCCGCAACTCCGCCAATACGAGCGAAACATCTGCAACTC  
CGGGCGGCTTGTGGGAGTGCAGCAAGTGCCTGGACGAGATGCGGCTGATGCAGAGGT  
TGGCGATCAGCGGACTCCTGTCCGTGATACTGATCGTCCTTCTCACCGGCACGTTTCGTC  
ACGCGTCGTGATCTCGGAACGTGGTGGAGCGTGGAGGGGCGCCCGAGGAGCGCAGC  
AGCGAGCAGCAAGCGAACCCCGCATGGGTGCAGAGTAACGCGATCCCGGGCCAGGAC  
GAGGCGAAACCCCTCGAGGATAAGGATCGATGGGTGGACCCGAGGCAGAGACAGTCG  
GAGCCGTCCGCGGTTCGGACACCGCCGGTCCCCGTCCCCGGGGCCCTACGTCATTAAAC  
CGCCTAATCCACCCCTGGATGACGTGACTAATCAGCGCCGCGAGAAGATCAAAGAGAT  
GATGAAGCATGGCTGGGACAACACTACGTGAGATACGCCTGGGGGAAGAACGAGCTGAG  
ACCGATCTCGAAGAGGGGTACAGCGCGAGCATCTTCGGCGCGTCGAACATGGGGGC  
GACCATCGTAGATGGCCTCGACACTCTGTACATCATGGGCCTTCACGACGAATTCAAGC  
AAGGCAGGGACTGGATAGCCGAGAACCTCGACTTCGATATC

>novel\_circ\_000622

CTGACGAGAATTCCGAGTCGATGAGATCGAAGCAAAGGGACGCGAGCTGAAAACGCG  
CGGCCGCCGTCGTTGAAGGCTACTTAAAACGACCATTGAGCACTCGTCGGGGTGCTCG  
AATTACCTACAACAGGTGGCCCGCAACTCCGCCAATACGAGCGAAACATCTGCAACTC  
CGGGCGGCTTGTGGGAGTGCAGCAAGTGCCTGGACGAGATGCGGCTGATGCAGAGGT  
TGGCGATCAGCGGACTCCTGTCCGTGATACTGATCGTCCTTCTCACCGGCACGTTTCGTC  
ACGCGTCGTGATCTCGGAACGTGGTGGAGCGTGGAGGGGCGCCCGAGGAGCGCAGC  
AGCGAGCAGCAAGCGAACCCCGCATGGGTGCAGAGTAACGCGATCCCGGGCCAGGAC  
GAGGCGAAACCCCTCGAGGATAAGGATCGATGGGTGGACCCGAGGCAGAGACAGTCG  
GAGCCGTCCGCGGTTCGGACACCGCCGGTCCCCGTCCCCGGGGCCCTACGTCATTAAAC  
CGCCTAATCCACCCCTGGATGACGTGACTAATCAGCGCCGCGAGAAGATCAAAGAG

>novel\_circ\_000624

GTGAGTCTTTGTGACCGAAGTTCAAAGCTGTTTCGTGCGCCACGATTGCCGGATTGTAA  
ATCGATTAAAAAATTGCGATGAACGATCGTTATAATCGATTGAAGTTAAAAGAAAAGAA  
AAAAAAAAGAAAGAAAGAAAAAAGAAAAAAGACGAAGCAGAGGGTCTTGTTACAT  
ATAATTGCGAGGATGTAAAG

>novel\_circ\_000625

CTTACAAGAGAAGATAAGTTACCTAAGAAGATATGCGATGATTGTGTGTATAAAGTAGA  
ATTATTTTATCAATTTTGAATACAACAGCAAACGCAGAAAAACAACCTTTTGCAATGGC  
TAGGAGAAGTCAGTTTAGAAGACAAACAGGGTTATGTTACCAATGTTCTCAATCCGAG  
TGTAATGAAACAAGAACAGAGTACAGAGAACAGGTTAGATGGCAATGTGATGCAGCA  
AGTAGAGGAGCATCAAAACAATATGGGGATGGGTATGATGGATAACATGGGTTTGGGT  
TTCCCATGATAATATCCAGTGCTAATCAACAACAAATCACCTCAGTTCCTATGGACACC  
AGCAGCAATTCTGTACAACTATTTCAGGCAGTACCTGGTCCAAGTTCACAACTACAC  
ATAACCAAATACCACAGAATCAAACAAGCTCTACGCAACAAGAAGATGAAGAGGAAA  
GTAGTGAAGATGAAGAAAACCTCTGACGAAGAATGTGATGGAGATGAAGGCCTACCTGT

AAAAGAAGAAAGTGAAGAAGATCCCAGCAATAGAACCATAGAGCCTACTACTTTTGTA  
AATGTTTCCTTGGCATGTGACGAAGCAGGTCCTTCAGGACTGCAGCAACAGAAGATCT  
CAGATATGCCTGAAATGCCAATTCCACAACCAACTGATGGGGATCCCAAATCTGG

>novel\_circ\_000626

GTACAATGCGCTAGACCCACTCGCTCCAACTTTTCTGATAGTAAAGCTAGAAGATAATT  
ACTTTCGGATACCAACGTCGCTGAGCGTGTTTCATGATGAAGGAACCGAATCCGAACGG  
AGAGGCGAACGCCCAATCGTCGTCGAAAGGCGAAATCGTGGAATCGGGGAAAACGAA  
GAACAACAACAACCAATCGGAAGAGAAAAACGAAGGATAACGCGAGCACGGACGACC  
CGTTCGACGATCTCGACGACGCGCCGTTGGACTTTCGAAAGAGGCAGGAACAGGAGA  
AGAGCAAATCGAGCAAACAAGTTCCAAAGAAGAAGGTGCACACATGCGAGATCTGTT  
ACGCAACGTTTCGACCGTAAGAGCAAGCACACCAGGCACATGTTCAAGCACAGCAACT  
CGAGGCCGCACAAGTGCGCCGTTTGCTCGAAAGGGTTCAAAACGACGGCTCACCTGT  
CCAGGCACATGGAGGTACACGACGAGCCTGTCAATTTGCACGCGTGCAGCCTGTGCGA  
CTTCAAAGCGCGCACCAAACCCTATCTCAAGATCCATTACATCAGAAAGCACACGGAG  
GATTACAATTACAAGTGCGAGCAATGCGGGAAGATGTTCAAGGTGCAGTCGGATTACA  
CGACCCACGTGAAGGACCACGACACGGAGTCTTGCGTGTGCGACATATGCGGCTCCTC  
TTATCCGAGCAAAAGCTCCCTCTACTTCCACAAACATTACAAGCACAAGACGAAGGTG  
AAGAAGTTTCAATGCCAGACCTGCAAGAAGAAGTTCAAGACGCAGAAGAATCTCGAC  
AGTCACATGGAAGTGCACAAGATCAAGTACGTTTGCGAGCAATGCGGGATGGAGTTCA  
AGAGCAAATACGGCCTCACCAAGCATCTGAGGACTCATTCAAGGGGAGAAATCTTATTT  
GTGCGCGATTTGCGGCAAGACATTCGGGTGTCTGAGCTCGCAGAAGATCCATCTGTTG  
ACGCACGTGCGGCAACGACCCTACGTTTGCGACATATGCGGGCAGAGCTTCACGCAGA  
GGTCGCCCATGATGCTGCATCGCAGGAAGCATCCGGGGGTGCATCCGCCTCCCCCACC  
GATCAAAATAACGAACCTGCTTCACGGTGTACAGGACAAAATAATCGTGAACAAGAGC  
GGCAA

>novel\_circ\_000627

AATTCAACAGGAAAATCATGGAAGATATTGCAAAGCGGGGAAATGTTCTCGATTAATAA  
ATCGTCTGTGAACGGGAATCGTAGTTGTGTTTTTAAATTTAATTGTTGAAAATAGTGGG  
GAGAGAGAGAGAAGAAAAAAATGAGAATAAAAGAATGAACAATTTTGCAGAGACTCT  
GACGAGGGATTTCGGCCTTTTAAATGGCCGAGGAGAGATCGTACGGCCTTTGAGGAGGA  
TCGTAGGACCATTTTTTCGGTGGCGATGTTTCAGGAAGCGGTCCTTCAACTGGACACAGG  
AGAAAAGGATCGCAGAGTAGTCTACGGATAGGCTACTATGACGGACTATTTGGATCCAC  
ATTTTCGTCAGGGCTCTCTGCCGCGATCCAGAACGACGAACGCTTCAAGATCTACAGAT  
CATATATTATGGTCTGCTTGGTCTGGAAGCGTTACGTCCGTGCAGAGATTCCATTCTCCG  
GGGGCTTTGCAAATTGTGCGATATGAAAGGCATCATGCGAATCATGTTCTTTACTACA  
CCGGTGAATTGGCCACAAGCTGGTACATATTACTCTCCGGCTCAGTGTTTCATCGATGGA  
TCGATGTTTCTTCCTCGTTCAAG

>novel\_circ\_000628

AGCTTGCCACAAACACCAGCTGGCGGTGTGGGTGGAAAAGGAAGCGGAAGTGCTGG  
CACCGGATCTGGTATGGTCAATGGTTCCGGTACCGATCATCAAGATATTCGTGACGGTG  
CTGCTATAAACACAGAACATGCCTTGGTATATCGGGACGGGAATCTGGTGTGCGGGCTCG

TTGGAAGCCCTGGTGCAGCATATGGTGCCCAACGAGGAATATTATCCCGATCGAGCTTA  
CCTCTTCGCCTTTTTGCTGAGCGCCAGGCTCTTCATCAAGCCGCACGAGCTTCTGGGC  
GAGGTCTGCGCCCTCTGCGAGCATCAGCAAAACCTGAATGGAGAGGGTGGCAAGGAA  
CGTCTGCAACGTTTCGTGCCGCGACTGGTGCAACTGCTCGCCGAATGGACGGAAACAT  
TCCCGTACGATTTCCGGGACGAGAGGGTGATGAGCCACGTCAGGTCCATCACGCAGAA  
GGTCGCTGCGGTCGACGCTGCGGCCAGGCAGGAAGTTTCGGCATTGCTGCAAAACTT  
GCTCCTCAGACTGACGGCCCTCGAGAGGTACGAGGAGGGTCTGGCCAGGCTGGCGAC  
CGAGGCAACGACGGAGCAACTCGCCCAG

>novel\_circ\_000629

GTGGACATCACCGAGCTGTGCCCATCGGCCACGGTCCTCGCCCAGCAATTGACCCACG  
TGGAACTCGAGAGGCTCTCGTACATCGGCCCCGAAGAATTCGTCCAAGCTTTCGCCAA  
GGAATCCCCTCATCTGGAAACATCGTTTAAGGACATGAAGAAAACGCGCAATCTCGAA  
TCGTACATCCAATGGTTTAACAGACTGAGCTATTTTCGTGCGGACTGAAGTATGCAAGCA  
TCCAAAAAAGAAACAACGAGTCCGGGTGATTGAATATTGGATCGAAACAGCCCGTGA  
GTGCTTCAACATCGGCAATTTCAACTCCCTGATGGCGATCATCGCTGGTTTGAACATAT  
CACCGATATCTCGTCTGAAGAAAACG

>novel\_circ\_000630

ATCCTGTTAACAAGGATGACAAATTCTATGAAGGAAAATTTAGACCTAATATTTATCAAA  
GTACAGCTGATAGACAAGCAGATTCTAAGTTAGATACGTGGGCATCGAAAACGAACAT  
TTTTCAGCATTCTAAAGGCCAATTTGGATCAGGAGTAAAAAATACAGCATTTAATTCAA  
CGAAGATTAATCCAAATGGTATAAACGCGAATATAAATGGTACAAGAGGTCATTTTCATC  
ACAAAAGAAATCGAAGTGAATCAAGGCCACTCGAAAATGAGAACTTACAGACCAAAC  
GATCTCCCAGGTCTGAATGAATTCAACAAAAGTGATAGAAATATCTATGTGCGATTCCCG  
AACAAACGTGATAACATAACCACTTACGGTTCCTCAACCACCACCCATTACTTCTGATA  
ATCATCCCTCTGGATCGAACAATATCCTACGCAATAATTCTTTTGGACATCGAACTCACA  
GGTATCATTGGACATACAACTCTTCCGCGAATTCTGGAAATTTGTCACCCTCTGGTAATT  
ATAACAATCGTGTACTCGTGCCGTCACGGGAACCTCAACCACCATATCCATCCCTTAAC  
AAGTCTCTGGTCCCTCCATTTCTATCAAAATTTCTTAAAGTATTCTCCAATACCATCCCC  
GATTTGCAACCACCAGATGACCACCAGTCTACGAATAAATTTTCTATCGGTTGGCAATT  
ACCAAATGACCCAATCGAACGCGAGTTGCCAACTTACGAGAATCGAAACACTTTTCAA  
CCATCGAGTCAATTGGTTCCCTCCGATTTTCGAATTGAACGTAAGTGGCCGATATCCAAA  
CGTTCCATCGACAAATCTCGAACCACCTGACCAAGAATTCGATAGTTTCTTCAACGATT  
CCGTGCTCAATAACGCGACACGAGAGATTCCGTCTTTGACAATTCCACCAAGGAAAAG  
ATTCGCCAACACCACCGAGAGTTCCGAAAACAGTGAAATTTCTACGACCGATCCAAAC  
GTGCCCAACCGTGTGGATAGATTACGAAAACCTTTCGACGATCGAGCATCCGATATTGT  
CGAGCCTGCTTCCGAGGAATCTGAAGCCGTAGAATCCGTGGACGTGTTGAGCGACAA  
GAAAGAGTGGAAGCCTGTACTGGTTTTTAAAAATGTGACTGAAACGACCACGAAGGC  
TTCTGTTATCATGAAGATCGATAAGAAGAACGTGGATGTAGATCTTTTCAATGTAGACG  
CTGCCCTTTTCGCGAAAG

>novel\_circ\_000631

GCGAGGAAGTCGTAACCGTGGCTCCGGCGAGCGGAGGTCAGGACAGTTGGAAAGTGC

AGAGGCTCTCGTTGGGAGGCGGGGAATCGGCGAGCAATCGTCGTAAAGGCTGCCGTC  
CCCAATTACAGGCGGGGAGCAAGCGAGCAAGGCCGCCACCGCCGATACCCGGCTTGT  
CGTGCAAGGTTAATGCCAAGGACGTGGACGGGTGGTACCCGTTTCGACCACTGGCCGA  
ACAAGGAGAACACGCCCCGAAATGGCGTGAACAACGGGGAGGGAACGAACGACGAC  
GAGGCGAAGCTCGAGAAGAACTCGGCTCGGACATGGGCTCGAATCTGAGCCGGCAC  
AACGGCAAGGGCCTTACGGGGCGGAGGACCCAGTCGTCCGGCAATTTGTGCGACCCG  
AAAGGGAAGTTGAACAGCATGGGGAAGATATTGGTCCCGTGTTCCAGCGCGCAGAGG  
GAGAG

>novel\_circ\_000632

GCGAGGAAGTCGTAACCGTGGCTCCGGCGAGCGGAGGTCAGGACAGTTGGAAAGTGC  
AGAGGCTCTCGTTGGGAGGCGGGGAATCGGCGAGCAATCGTCGTAAAGGCTGCCGTC  
CCCAATTACAGGCGGGGAGCAAGCGAGCAAGGCCGCCACCGCCGATACCCGGCTTGT  
CGTGCAAGGTTAATGCCAAGGACGTGGACGGGTGGTACCCGTTTCGACCACTGGCCGA  
ACAAGGAGAACACGCCCCGAAATGGCGTGAACAACGGGGAGGGAACGAACGACGAC  
GAGGCGAAGCTCGAGAAGAACTCGGCTCGGACATGGGCTCGAATCTGAGCCGGCAC  
AACGGCAAGGGCCTTACGGGGCGGAGGACCCAGTCGTCCGGCAATTTGTGCGACCCG  
AAAGGGAAGTTGAACAGCATGGGGAAGATATTGGTCCCGTGTTCCAGCGCGCAGAGG  
GAGAGATACAAATTCTGTGGCTCGTTGCCGAATCATCTGGACGACAAGGACGCGTTGG  
ACGACGATCCGAAGGAAAATAATAACGTAATGACGGATACGATCGGTGGGAATCTTGG  
TGGGACATTGCCGCACAAGAAACGATCGTTGGGCGTGCATTTCTCGGACGGAGGACC  
AACCGGGACTCTGGACCTCGTGAAACATCGATCCCAAGATTCTTTGGACGAGAACGAT  
CCTTGGAGGTATCAGCAGAGCGATCTCGATCTGGTGCGATGCCGTCACGGTAATTTCGA  
CTCGGTGAGAAGAAATCGGAACGCCGAGACGTTGTCTGGCGATTCCGGCGAGAAGGTA  
TACACGAGGCACGTCCCTTGAGGACAGATGTCACCGAAATTCGGAACCTGGATCTGGTG  
GGCACGCTGCCGAAACGGAAGCAGGACAGCAGGAACGGCGGCGGGAAGAGCGGGG  
CGAGCTTGGAACGAACCTCTTCGTCGTCCCAACCGTGCGTCCCAGACGCGGCCGACA  
ACGATCTTCTGATGCAGATCGTGACAAGCCCGATTGCGAGTTGGTCAGGCATCGGCA  
ACAGCTCGGCAAGTGCATCGATTTGAAGTTGAGCAAACCTGGCTGGCGGGGAACCGCA  
GGATCAAGGTTACGCCTCGGAACGGTCCCCGGAGGACGAGCATCCTCCCTCTTTGCCG  
GGCCAACCCTTCCCGAATATCACGGCCG

>novel\_circ\_000633

ATACAAATTCTGTGGCTCGTTGCCGAATCATCTGGACGACAAGGACGCGTTGGACGAC  
GATCCGAAGGAAAATAATAACGTAATGACGGATACGATCGGTGGGAATCTTGGTGGA  
CATTGCCGCACAAGAAACGATCGTTGGGCGTGCATTTCTCGGACGGAGGACCAACCG  
GGACTCTGGACCTCGTGAAACATCGATCCCAAGATTCTTTGGACGAGAACGATCCTTG  
GAGGTATCAGCAGAGCGATCTCGATCTGGTGCGATGCCGTCACGGTAATTTGACTCG  
GTGAGAAGAAATCGGAACGCCGAGACGTTGTCTGGCGATTCCGGCGAGAAGGTATACA  
CGAGGCACGTCCCTTGAGGACAGATGTCACCGAAATTCGGAACCTGGATCTGGTGGGC  
ACGCTGCCGAAACGGAAGCAGGACAGCAGGAACGGCGGCGGGAAGAGCGGGGCGA  
GCTTGGAACGAACCTCTTCGTCGTCCCAACCGTGCGTCCCAGACGCGGCCGACAACG  
ATCTTCTGATGCAGATCGTGACAAGCCCGATTGCGAGTTGGTCAGGCATCGGCAACA  
GCTCGGCAAGTGCATCGATTTGAAGTTGAGCAAACCTGGCTGGCGGGGAACCGCAGGA

TCAAGGTTACGCCTCGGAACGGTCCCCGGAGGACGAGCATCCTCCCTCTTTGCCGGGC  
CAACCCTTCCCGAATATCACGGCCG

>novel\_circ\_000634

TATGGGCACAGGGCGACTTCCGGGACGAGGTGACCGGGGGTTTGGCAAGGCTCGATT  
TGACGGGTACGAGCTCACACTCCCGGTGGAAGCAACCCCAGCACACCGGGCGCGA  
CACCCACCACACCCTCCGGTGGATTTTCTACCGCACAACTAGGTCCCGCACGAACAC  
GACACACAGGCCGGATATCCGAAAAGATGTTGCGACACCGACAGAGGTGAAACACGA  
ATTGGGAGCCGGTGGAGGGGTGTCTCCCCTGACGGTGTGGTTGGGGTAAATAACGCG  
GACGATAAGGATGGAAGAAGAACAAACGCCAGAGGCGGCAGAGGACGCATTTTAC  
GTCCCAACAACCTCAAGAGCTCGAGGCTTTGTTTCATGAGGAATCGGTATCCAGATATGT  
CGACCAGGGAAGAAATAGGTCTGTTACCAAACCTTCCAGAACCTCGTGTACAG

>novel\_circ\_000636

ATACACCATGGAGAAAAATGAAAAGGAGGAACAAGGCAATCCTATGAAAGAGTTCAAT  
AGCAGAACGAAAATAGCCACCATTGAAATTGAAGGATACAACGAGAAGGACGATTTAT  
ACAATCCCTTCGAAAATCGTGACAAAAAAATTCGAATTCAGATTTTGGCGCCCTGGC  
ACATCTATTGAAATCATCCCTCGGTACGGGAATCCTCGCCATGCCGAATGCGATCAAAA  
ATGGCGGGGTGATATTCGGCGGGATAGGGACGATAATAATCGGCTTGATATGCGCGCAT  
TGCGTCCACATATTGGTTCGCTCGTCCCACATTCTGTGCAAACGTACGAAAACACCCCA  
GATGACGTATGCCGAGACGGCGGAAGCTGCCTTCCTTTGCGGTCCAAAAACCGTCAGA  
CCTTTCGCTAATTTTCAGTCGAATGTTTCGTAAATGCGGCATTGTGCGCCACGTACATAGG  
CGGTGCTTGCGTATACGTGGTTTTTCGTATCGACCTCGATTAAACAGCTGGTGGACTTCC  
ACACCGGCATGACTATAACCGATGCGTTTGTACATACTCACGCTGATACCCGCTGTATTAT  
TGTTGGGGCAAGTGCGAAATTTGAAGTTCATGGTGCCGTTCTCCATCGTGGCCAACT  
TTCCATGATGACCGGTTTCGCCCTTGACTCTCTATTATATCTTCAATGATATCAAAATACCG  
TCCCACGTGAAGCCAATCGCCTCGATCGAACAATTGCCTTCCTTCTTCGCCACCGTATT  
ATTTGCCATCGAGGGTATCGGTGTTGTGATGCCCCGTCGAGAACAGTATGAAGAATCCTC  
ATCACTTCCTCGGTTGTCCAAGCGTTCTTAACATAACAATGACTATAGTGGTGTCTTTGT  
ACACCGTGTTAGGCGTGTTTCGGATATTTGAAGTACACGGAAGATATTAAGGGTAGTATC  
ACGCTAAATATACCAACAGAGGACATATTGGGACAGGCGGTAAAATTGCTCATCGCCCT  
GGCAGTTTTATTACATACGGATTACAACTTTTCGTTCCGATGGATATCATGTGGAGAGC  
TGTGAAAGAGAAATGCAGTCACAAGTATCAAGGCTTGTGCCACACAGTAATGAGAATA  
TGCATAAGTATATTACAA

>novel\_circ\_000637

CTGAATGGACACGGTGGCAAGGTACGACGCATGGATAGATAAAAATTTCTGACAACCA  
GGAAACGTGCGGCATGGGTCTGCCGCGTCTCTCCCTGAAGGGATATTTTTTCTACGTGC  
TATGCTCATCTGGCCTGTTGTTGGTTATATTGAATCTAGTGCAGGACGAGATATGGCACC  
GTATGCGACCTCATCCTGGACGAACGCCACCCGTTTCGCGTTTCCGACAGCGCAAAG

>novel\_circ\_000638

GTATTCAACTTAACTGGCACCACGACCTTATCACGAAACAGTTTAGAATCCTTGGATCC  
ATCAAAGAGACCTTGGTACATGAAAGGAGGGAGCAGAAGGCCTTATCCTGCCATAAAA

TCTCATCGTACTGGTCGAAGATTGGCGCGTTTGTGGCCCCGACGAAGACGCTTATGACG  
ATCGTGTTACCAATCAGTTAATGTACGTGCCCCTGATTATAACAAAACCAAGTGGCGAT  
CGCCCGTTAAAGAAAATAATGGTTCCACATGGTATGCCAGAGGCAAAAGTTGGCCCCG  
ATATATTTCTCCAGCATCGATGCCAGTCAATACGTGTACAATCATCAGGGATAACGCCG  
AGGAGGCCGATTTAATTTTATTTCAAGACTATATAACCCATGTGGGAAGAAGATCTTCG  
AATCAACAGGTGTGGATGCTGTATTTTTTAGAGTGCCCTTATCACACGCAGAGCGTGAA  
GAACGCTATCATCAATTGGACGGCAACTTATCGTCGTGACAGCGACATAGTCGCGCCCT  
ATGAAAGGTGGCAATATTACGACCCTAGTATTACACAAATACCGCAGACTTTTAATTATG  
CAGCCAACAAAACCTAAAAAGGTAGCCTGGTTCGTTTCCAATTGCCATCCTCGGAATCA  
ACGTATGCATTACGCTAGAGAATTGTGCGAAATACATCCAAGTTGACATTTATGGGACCT  
GCGGCACTTTAAGATGTCCACGTTTCGAGTCTCAAGCGTGTTTCGATATGCTCGACGAG  
GATTACAAGTTTTATCTCGCGTTCGAGAATTCGAATTGCAAAGACTATATCACGGAAAA  
GTTCTTCGTCAATGGTCTTGG

>novel\_circ\_000639

GTATTCAACTTAACTGGCACCACGACCTTATCACGAAACAGTTTAGAATCCTTGGATCC  
ATCAAAGAGACCTTGGTACATGAAAGGAGGGAGCAGAAGGCCTTATCCTGCCATAAAA  
TCTCATCGTACTGGTCGAAGATTGGCGCGTTTGTGGCCCCGACGAAGACGCTTATGACG  
ATCGTGTTACCAATCAGTTAATGTACGTGCCCCTGATTATAACAAAACCAAGTGGCGAT  
CGCCCGTTAAAGAAAATAATGGTTCCACATGGTATGCCAGAGGCAAAAGTTGGCCCCG  
ATATATTTCTCCAGCATCGATGCCAGTCAATACGTGTACAATCATCAGGGATAACGCCG  
AGGAGGCCGATTTAATTTTATTTCAAGACTATATAACCCATGTGGGAAGAAGATCTTCG  
AATCAACAGGTGTGGATGCTGTATTTTTTAGAGTGCCCTTATCACACGCAGAGCGTGAA  
GAACGCTATCATCAATTGGACGGCAACTTATCGTCGTGACAGCGACATAGTCGCGCCCT  
ATGAAAGGTGGCAATATTACGACCCTAGTATTACACAAATACCGCAGACTTTTAATTATG  
CAGCCAACAAAACCTAAAAAGGTAGCCTGGTTCGTTTCCAATTGCCATCCTCGGAATCA  
ACGTATGCATTACGCTAGAGAATTGTGCGAAATACATCCAAGTTGACATTTATGGGACCT  
GCGGCACTTTAAGATGTCCACGTTTCGAGTCTCAAGCGTGTTTCGATATGCTCGACGAG  
GATTACAAGTTTTATCTCGCGTTCGAGAATTCGAATTGCAAAGACTATATCACGGAAAA  
GTTCTTCGTCAATGGTCTTGGACACAACGTTCTGCCAATTGTAATGGGTGCCCATCCAA  
CGGACTATGCTCGAAGCGCGCCATACCGTTCTTACATCCACGTGGACGAGTTCGAATCG  
CCGAAAGAGTTGGCCGAGTATCTTCATCGTTTGGATCGAGACGACGAGCTGTATAATTC  
GTAATTTTCGCTGGAAAG

>novel\_circ\_000640

GCTGTACGAAGCGAAGTGCAAAAAAGGCTTCCAAAGGAATGGTCCGAAGAAGAGATC  
GCTCAGCTCACCGAACCTTGGGAACAATTAAAAAATGACGATGATCCCGTGGACCTGA  
TCTTCAATGGGCTGACAATAAAGCGACCGAAGCCAAAGATCAAGGAGAAGCTTTTGG  
AATTAGGATTGGCCACGGATCGCAAGGATCTTCGAAAAAGCGATCGAGAAAAAGCA  
ACCACG

>novel\_circ\_000642

ATCTATACGTCAGAGACGTTGAAGCAAGCCGAAGGTGTGGTGAGCACAGTGAGGTGC  
GAGGGCAGGGAACATGCCCTCGGCCGCGGAATCAAGCGAAAGCTGGACTCCATCCAT



TCCATGCATTCTACCCTGCATGAAGACCAAGATGTAGCCGAGGCAAAGTCGGAGGAGA  
AGAGCCAGAGGAAACTGGAGGTGGGTGAGCTAGTATGGGGCGCCGCAAGAGGAAGT  
CCGGCGTGGCCGGGCAAGGTCGAGTCTTTGGGCCACCGGGCACCATGACGGTGTGG  
GTCCGTTGGTACGGGGGCGGGGGCGGTGCGAGCCAGGTCGAGGTCAAGGCTCTCAAG  
TCCCTCTCCGAAGGCCTCGAGGCGCACCAACCGTGC GCGAAAAAAGTTTAGGAA

>novel\_circ\_000643

GTGAAGATCCGATGCTCAGCGACCAACAGCAATATCGATACATGACTGTTGACGACAT  
GAAATCTATGGGGGATGACTCGATGCGTGTCAACGTGACGGACGACGAGAGGGATAAC  
CGGCATTCCGGAGCGCCACGATAACCGAGATGATCACGAAGGAAACTTGTACGCGTA  
CAAATGCCGCCAATCTGAAACCGGACAATGTCGATATCAATAGGCACCCAGTACACGT  
CGG

>novel\_circ\_000644

GTGAAGATCCGATGCTCAGCGACCAACAGCAATATCGATACATGACTGTTGACGACAT  
GAAATCTATGGGGGATGACTCGATGCGTGTCAACGTGACGGACGACGAGAGGGATAAC  
CGGCATTCCGGAGCGCCACGATAACCGAGATGATCACGAAGGAAACTTGTACGCGTA  
CAAATGCCGCCAATCTGAAACCGGACAATGTCGATATCAATAGGCACCCAGTACACGT  
CGGATTTTGTCTGAGATCAGACCGTCCCTAGAGTCCTTAAACACATCGCTGGCAGCTC  
TTGGTACCATGTGCGAAAGGACAAGGAATGTGGAGGGACAGCTTCCTGGTTTCGTTTCT  
GGTGGATGCACGAGGCGGTGCGATGCGCGGCTGCAGGCACAGTGGCGTGCGCGTGAT  
CGTTCCTCCTAGGAAAGCAGCGATGCCTATGCGCGTCACGTGCAGATACCTGAGAAGG  
GACAAATTGACGAACCCGCCGCCTTTGATGGAGGGGGAGGCTCTTGCGAGTCGTATCC  
TGGAGTTGGGACCCGTGGGCGCCAAATTTTGGGACCCGTGATCATAGAAGTACCACA  
CTTTGCTTCGTTGCGAGGAAAAGAACGAGAGATAGTTATACTCCGATCAGATAATGGA  
GAGACTTGGCGCGAGCACACCTTGGAAGCCAGCGAGGAGGCCGTCCAAGATGTGCTT  
AATGAGAGCTTTGAAGGAGAAGAATTAAGCCAGCTCGAGGATCTCCAAACTTCTCGGA  
TCGTGAGGATACTTACGGCAGACTTCCCACATTACTTCGCAGTAGTGTCCCGTATCAGG  
CAAGAGGTTACGCAGTCGGTCCAGAAGGTGGCACCGTTTCTTCGTCGGCTGTACCTC  
AAGTCCAGGCCGTATTCCCGCCAGCGGCACTTACTAAAAAGATCAGAGTTGGGCTCCA  
GGCGCATCCAATACCGGCAGATCTTGTGCGCAAGCTGCTTGGTAACAGAGTGGCTGTAT  
CGCCAATCGTCACCGTCGAGCCGAGACGAAGAAAATTCCACAAACCGATAACCTTAAC  
CATACCCGTGCCTCAAGCGGCCAATAAAGGCATGATCAATCAATATTCAGGAGATGCGC  
CGACGCTGAGACTTCTGTGCAGCATAACTG

>novel\_circ\_000645

GTGAAGATCCGATGCTCAGCGACCAACAGCAATATCGATACATGACTGTTGACGACAT  
GAAATCTATGGGGGATGACTCGATGCGTGTCAACGTGACGGACGACGAGAGGGATAAC  
CGGCATTCCGGAGCGCCACGATAACCGAGATGATCACGAAGGAAACTTGTACGCGTA  
CAAATGCCGCCAATCTGAAACCGGACAATGTCGATATCAATAGGCACCCAGTACACGT  
CGGATTTTGTCTGAGATCAGACCGTCCCTAGAGTCCTTAAACACATCGCTGGCAGCTC  
TTGGTACCATGTGCGAAAGGACAAGGAATGTGGAGGGACAGCTTCCTGGTTTCGTTTCT  
GGTGGATGCACGAGGCGGTGCGATGCGCGGCTGCAGGCACAGTGGCGTGCGCGTGAT  
CGTTCCTCCTAGGAAAGCAGCGATGCCTATGCGCGTCACGTGCAGATACCTGAGAAGG

GACAAATTGACGAACCCGCCGCCTTTGATGGAGGGGGAGGCTCTTGCGAGTCGTATCC  
TGGAGTTGGGACCCGTGGGCGCCAAATTTTGGGACCCGTGATCATAGAAGTACCACA  
CTTTGCTTCGTTGCGAGGAAAAGAACGAGAGATAGTTATACTCCGATCAGATAATGGA  
GAGACTTGGCGCGAGCACACCTTGGAAGCCAGCGAGGAGGCCGTCCAAGATGTGCTT  
AATGAGAGCTTTGAAGGAGAAGAATTAAGCCAGCTCGAGGATCTCCAAACTTCTCGGA  
TCGTGAGGATACTTACGGCAGACTTCCCACATTACTTCGCAGTAGTGTCCCGTATCAGG  
CAAGAGGTTACGCAGTCGGTCCAGAAGGTGGCACC GTTTCTTCGTGGCTGTACCTC  
AAGTCCAGGCCGTATTCCCGCCAGCGGCACCTTACTAAAAAGATCAGAGTTGGGCTCCA  
GGCGCATCCAATACCGGCAGATCTTGTGCGCAAGCTGCTTGGTAACAGAGTGGCTGTAT  
CGCCAATCGTCACCGTCGAGCCGAGACGAAGAAAATTCCACAAACCGATAACCTTAAC  
CATACCCGTGCCTCAAGCGGCCAATAAAGGCATGATCAATCAATATTCAGGAGATGCGC  
CGACGCTGAGACTTCTGTGCAGCATAACTGGATTGAGTCATTTAGCACATTCGTTTGAC  
TGGTAACCGCTTCGATATTAGGCTTGTAATTTATTA ACTTCTATATAAAAAATTGTGTTA  
TCAGAAATATATGTACTTTTAGATTTAGGGGTCAGTCTCGGGCAGTCTGGGAGGATGTCA  
CCGGTTCGACGCCATTGACGTTTGTGAAAGATTGCGTTTCCTTTACTACCACGGTATCC  
GCTCGCTTCTGGTTAATGGATTGTGCGAATATATCCGAAGCCACGAAAATGGCTACGGA  
GCTATACACACACGCGACACACGTACCTTTTATGGCTAAATTTGTAGTATTTGCAAAGC  
GAGTAGATCCATTGGAGGCGAGGTTGCGCGTGT TTTGTATGACCGACGATAAAGAGGA  
CAAAACCTTGAGAAATCAAGAGCACTTCACGGAAGTGGCGAAGAGCCGGGACGTGG  
AGGTGTGTTGGAGGGGAAAACGCAATACATGGAATTTTCGGGTAACCTCGTGCCGGTA  
TTGAAGAGCGGGGAACAGCTGCAATTGCCTTTCAGAGCTTTCAAGGAGAACCGAGTG  
CCGTTACGCGGAGAATAAAGGATCCGGACGCGGCCGACATGATGGGCCGCATAATGT  
TCATGAGCGAGCCAAAGGTTCCCAAAGGCGAATTACCTCAGACCCCTATATGCACGTT  
GAACATTTTGCTGCCGGAGAAAATCTCGCCGGAGTCTGCCGTCTCCGAGATCGATTTG  
TTAGAACTCTCCAAGAATTATAGTTTTCTGCGCGACGGCGGGATAAGTCGTCCGGACGC  
TATTCACAGAGCCACCATCCGATTGACCGACATTGCAAATTTGTTGGACAAAGATTGGG  
AGAAACTCGCGGAGGAATTAAACGTGCCGCCGAACGAAGTGTGACGATCAAGCAAG  
AGTACGCCAACAAGCCGGCCCAACAAGCTGCGGCGATGCTCAAAGTTTGGCAGAGCA  
ATGGAAATAAAGCAACAGGAAACACTTTGGAGAAAGCGTTGAACAAAATTGGCCGCG  
ATGACATCGTGAAAAAATGTATATTCAACGTTGAATTGATCACCGATGACGTGGAGAAA  
GCTGTGGCGAGAGTTCGATTGGATCAACCTGGATTGATTCTTTGAAAGAAGAATTGG  
GTCCTTCAAGGGACACCTCTCTTCGCCGTGATGCGACCATGGATCCAAAGATGAATCCT  
GATTACGATGACTTTAATAAGAGCAAGGAGTCGGGATCTATGGAAGAACTCGATATAAG  
CGGCGCTAAACGAGATAAATCGAAACAGCATGTCACGATCACAAACGGCACTGTATTC  
AACGGAACCTCGACCCCTATCAAAGATAAATACGCGAGCGAGGAGAAAGAACTGGGG  
GATGTAATGGCCGATTTTCTCGAGCACAAATGTCACGTTAGCGATACGATGAGCAAAAA  
GTTGCGCGATGAACTTGACGACAAAGATAAAAAACGGCAGAGGGTGATCGCAGACGC  
CAACAAAATAGTATCCG

>novel\_circ\_000646

CTTCCTGGTTTCGTTTCTGGTGGATGCACGAGGCGGTGCGATGCGCGGCTGCAGGCAC  
AGTGGCGTGCGCGTGATCGTTCCTCCTAGGAAAGCAGCGATGCCTATGCGCGTCACGT  
GCAGATACCTGAGAAGGGACAAATTGACGAACCCGCCGCCTTTGATGGAGGGGGAGG  
CTCTTGCGAGTCGTATCCTGGAGTTGGGACCCGTGGGCGCCAAATTTTGGGACCCGT

GATCATAGAAGTACCACACTTTGCTTCGTTGCGAGGAAAAGAACGAGAGATAGTTATA  
CTCCGATCAGATAATGGAGAGACTTGGCGCGAGCACACCTTGGAAGCCAGCGAGGAG  
GCCGTCCAAGATGTGCTTAATGAGAGCTTTGAAGGAGAAGAATTAAGCCAGCTCGAGG  
ATCTCCAAACTTCTCGGATCGTGAGGATACTTACGGCAGACTTCCCACATTACTTCGCA  
GTAGTGTCCCGTATCAGGCAAGAGGTTACGCGAGTCGGTCCAGAAGGTGGCACCGTTT  
CTTCGTGCGGCTGTACCTCAAGTCCAGGCCGTATTCCCGCCAGCGGCACTTACTAAAAA  
GATCAGAGTTGGGCTCCAGGCGCATCCAATACCGGCAGATCTTGTCGCCAAGCTGCTT  
GGTAACAGAGTGGCTGTATCGCCAATCGTCACCGTCGAGCCGAGACGAAGAAAATTCC  
ACAAACCGATAACCTTAACCATAACCGTGCCTCAAGCGGCCAATAAAGGCATGATCAAT  
CAATATTCAGGAGATGCGCCGACGCTGAGACTTCTGTGCAGCATAACTG

>novel\_circ\_000647

CTTCCTGGTTTCGTTTCTGGTGGATGCACGAGGCGGTGCGATGCGCGGCTGCAGGCAC  
AGTGGCGTGCGCGTGATCGTTCCTCCTAGGAAAGCAGCGATGCCTATGCGCGTCACGT  
GCAGATACCTGAGAAGGGACAAATTGACGAACCCGCCGCCTTTGATGGAGGGGGAGG  
CTCTTGCGAGTCGTATCCTGGAGTTGGGACCCGTGGGCGCCAAATTTTTGGGACCCGT  
GATCATAGAAGTACCACACTTTGCTTCGTTGCGAGGAAAAGAACGAGAGATAGTTATA  
CTCCGATCAGATAATGGAGAGACTTGGCGCGAGCACACCTTGGAAGCCAGCGAGGAG  
GCCGTCCAAGATGTGCTTAATGAGAGCTTTGAAGGAGAAGAATTAAGCCAGCTCGAGG  
ATCTCCAAACTTCTCGGATCGTGAGGATACTTACGGCAGACTTCCCACATTACTTCGCA  
GTAGTGTCCCGTATCAGGCAAGAGGTTACGCGAGTCGGTCCAGAAGGTGGCACCGTTT  
CTTCGTGCGGCTGTACCTCAAGTCCAGGCCGTATTCCCGCCAGCGGCACTTACTAAAAA  
GATCAGAGTTGGGCTCCAGGCGCATCCAATACCGGCAGATCTTGTCGCCAAGCTGCTT  
GGTAACAGAGTGGCTGTATCGCCAATCGTCACCGTCGAGCCGAGACGAAGAAAATTCC  
ACAAACCGATAACCTTAACCATAACCGTGCCTCAAGCGGCCAATAAAGGCATGATCAAT  
CAATATTCAGGAGATGCGCCGACGCTGAGACTTCTGTGCAGCATAACTGGATTGAGTCA  
TTTAGCACATTCGTTTGACTGGTAACCGCTTCGATATTAGGCTTGTAATTTATTAATTCT  
ATATAAAAAATTGTGTTTATCAGAATATATGTAATTTAGATTTAGGGGTCAGTCTCGGG  
CAGTCTGGGAGGATGTCACCGGTTTCGACGCCATTGACGTTTGTGAAAGATTGCGTTTC  
CTTACTACCACGGTATCCGCTCGCTTCTGGTTAATGGATTGTCGGAATATATCCGAAGC  
CACGAAAATGGCTACGGAGCTATACACACACGCGACACACGTACCTTTTATGGCTAA

>novel\_circ\_000648

CTTCCTGGTTTCGTTTCTGGTGGATGCACGAGGCGGTGCGATGCGCGGCTGCAGGCAC  
AGTGGCGTGCGCGTGATCGTTCCTCCTAGGAAAGCAGCGATGCCTATGCGCGTCACGT  
GCAGATACCTGAGAAGGGACAAATTGACGAACCCGCCGCCTTTGATGGAGGGGGAGG  
CTCTTGCGAGTCGTATCCTGGAGTTGGGACCCGTGGGCGCCAAATTTTTGGGACCCGT  
GATCATAGAAGTACCACACTTTGCTTCGTTGCGAGGAAAAGAACGAGAGATAGTTATA  
CTCCGATCAGATAATGGAGAGACTTGGCGCGAGCACACCTTGGAAGCCAGCGAGGAG  
GCCGTCCAAGATGTGCTTAATGAGAGCTTTGAAGGAGAAGAATTAAGCCAGCTCGAGG  
ATCTCCAAACTTCTCGGATCGTGAGGATACTTACGGCAGACTTCCCACATTACTTCGCA  
GTAGTGTCCCGTATCAGGCAAGAGGTTACGCGAGTCGGTCCAGAAGGTGGCACCGTTT  
CTTCGTGCGGCTGTACCTCAAGTCCAGGCCGTATTCCCGCCAGCGGCACTTACTAAAAA  
GATCAGAGTTGGGCTCCAGGCGCATCCAATACCGGCAGATCTTGTCGCCAAGCTGCTT

GGTAACAGAGTGGCTGTATCGCCAATCGTCACCGTCGAGCCGAGACGAAGAAAATTCC  
ACAAACCGATAACCTTAACCATAACCCGTGCCTCAAGCGGCCAATAAAGGCATGATCAAT  
CAATATTCAGGAGATGCGCCGACGCTGAGACTTCTGTGCAGCATAACTGGATTGAGTCA  
TTTAGCACATTCGTTTGACTGGTAACCGCTTCGATATTAGGCTTGTAATTTATTAACCTCT  
ATATAAAAAATTGTGTTTATCAGAATATATGTACTTTTAGATTTAGGGGTCAGTCTCGGG  
CAGTCTGGGAGGATGTCACCGGTTTCGACGCCATTGACGTTTGTGAAAGATTGCGTTTTC  
CTTTACTACCACGGTATCCGCTCGCTTCTGGTTAATGGATTGTCGGAATATATCCGAAGC  
CACGAAAATGGCTACGGAGCTATACACACACGCGACACACGTACCTTTTATGGCTAAAT  
TTGTAGTATTTGCAAAGCGAGTAGATCCATTGGAGGCGAGGTTGCGCGTGTTTTGTATG  
ACCGACGATAAAGAGGACAAAACCTTGAGAAATCAAGAGCACTTCACGGAAGTGGCG  
AAGAGCCGGGACGTGGAGGTGTGTTGGAGGGGAAAACGCAATACATGGAATTTTCGG  
GTAACCTCGTGCCGGTATTGAAGAGCGGGGAACAGCTGCAATTGCCTTTCAGAGCTTT  
CAAGGAGAACCGAGTGCCGTTACGCGCGAGAATAAAGGATCCGGACGCGGCCGACAT  
GATGGGCCGCATAATGTTTCATGAGCGAGCCAAAGGTTCCCAAAGGCGAATTACCTCAG  
ACCCCTATATGCACGTTGAACATTTTGCTGCCGGAGAAAATCTCGCCGGAGTCTGCCGT  
CTCCGAGATCGATTTGTTAGAACTCTCCAAGAATTATAGTTTTCTGCGCGACGGCGGGA  
TAAGTCGTCCGGACGCTATTCACAGAGCCACCATCCGATTGACCGACATTGCAAATTTG  
TTGGACAAAGATTGGGAGAAAACCTCGCGGAGGAATTAAACGTGCCGCCGAACGAAGTG  
TCGACGATCAAGCAAGAGTACGCCAACAAGCCGGCCCAACAAGCTGCGGCGATGCTC  
AAAGTTTGGCAGAGCAATGGAAATAAAGCAACAGGAAACACTTTGGAGAAAGCGTTG  
AACAAAATTGGCCGCGATGACATCGTGAAAAAATGTATATTCAACGTTGAATTGATCAC  
CGATGACGTGGAGAAAGCTGTGGCGAGAGTTCGATTGGATCAACCTGGATTTGATTCT  
TTGAAAGAAGAATTGGGTCCTTCAAGGGACACCTCTCTTCGCCGTGATGCGACCATGG  
ATCCAAAGATGAATCCTGATTACGATGACTTTAATAAGAGCAAGGAGTCGGGATCTATG  
GAAGAACTCGATATAAGCGGCGCTAAACGAGATAAATCGAAACAGCATGTCACGATCA  
CAAACGGCACTGTATTCAACGGAACCTCGACCCCTATCAAAGATAAATACGCGAGCGA  
GGAGAAAGAAGTGGGGGATGTAATGGCCGATTTTCTCGAGCACAAATGTCACGTTAGC  
GATACGATGAGCAAAAAGTTGCGCGATGAACTTGACGACAAAGATAAAAAACGGCAG  
AGGGTGATCGCAGACGCCAACAATAAGTATCCG

>novel\_circ\_000649

CTTCTGGTTTCGTTTCTGGTGGATGCACGAGGCGGTGCGATGCGCGGCTGCAGGCAC  
AGTGGCGTGCGCGTGATCGTTCCCTCCTAGGAAAGCAGCGATGCCTATGCGCGTCACGT  
GCAGATACCTGAGAAGGGACAAATTGACGAACCCGCCGCCTTTGATGGAGGGGGAGG  
CTCTTGCGAGTCGTATCCTGGAGTTGGGACCCGTGGGCGCCAAATTTTTGGGACCCGT  
GATCATAGAAGTACCACACTTTGCTTCGTTGCGAGGAAAAGAACGAGAGATAGTTATA  
CTCCGATCAGATAATGGAGAGACTTGGCGCGAGCACACCTTGGAAAGCCAGCGAGGAG  
GCCGTCCAAGATGTGCTTAATGAGAGCTTTGAAGGAGAAGAATTAAGCCAGCTCGAGG  
ATCTCCAAACTTCTCGGATCGTGAGGATACTTACGGCAGACTTCCCACATTACTTCGCA  
GTAGTGTCCCGTATCAGGCAAGAGGTTACGCGAGTCGGTCCAGAAGGTGGCACCGTTT  
CTTCGTGCGGCTGTACCTCAAGTCCAGGCCGTATTCCCGCCAGCGGCACTTACTAAAAA  
GATCAGAGTTGGGCTCCAGGCGCATCCAATACCGGCAGATCTTGTCGCCAAGCTGCTT  
GGTAACAGAGTGGCTGTATCGCCAATCGTCACCGTCGAGCCGAGACGAAGAAAATTCC  
ACAAACCGATAACCTTAACCATAACCCGTGCCTCAAGCGGCCAATAAAGGCATGATCAAT

[illegible]

GGGTTGATCGACTCGGCTCGAGTCGAGGATAGGGAGGAGGCGGTCAAGGACGGGGAG  
GACACCAGCGATCAGGAGAGGGAGAAAGGGGGCGGTTTCTTCGGCATGTTCAAGAGT  
CCAAAGTCGAAGGAGAAGAGAGCGAAGAAGAGCAAGGAGTCGTCTGTTGGACAGTGG  
CGACGAGGAGGGTATTCGAATCGCCACGGAGAGATTGTTGGACGATACGCGAAAGGTT  
GCCGAAACAACGATCGTTGTTCCCGTGATCGACGGGAAACAGGATCTGTACACGTTCA  
CCTCGCAGGTTCGTTACAACGAGGACACGCCGAAGGATAAATTGAACGGCCATTCGTA  
CGATATTTTCGGAGATTTCGTAGGAAAGAGGAGGGGCGCAAGGAAGCTAATGGAAAATC  
GGACGCGGGGAGGAAGCGGAAGGAGGTTGGAAGTTTGGAAAGGCAAGGTGGCGAGA  
AAAAGTCAGACTCCCCGGAGAAAAGGGTGGAGAAGGAGGAGGAGGAAGAGGGTGGT  
AAGGAGAAGGGTGGCGGATTCTTCGGCATGTTCAAGAGCCCGAAGCTGAAGAGCAAG  
AAGAGGAGTTCGTCTGAGGGAGAAGAGCTCTTCGAAGGAAGCGTCGTTTCGACAGCGG  
GGACGAGGAGACGCGGCAGTTGACGGCAGAATTTTTGGAGGATACGAGGAAAGTGGC  
GGAGAGCATGCACCGCGAAGGGTCGAGGCAGATCGGCGAAAGGATGACGCCGGCCG  
ACGGGGCACCGGCCATCATCGAGGTGACCACGGAGCCCGTGGACAAGGACAGAGGA  
GGAGGAGGGATCTTCGGGAAGTTCAAGAGTCCAAAATTGACGAGGGCGTCGCGAAGC  
AGGTCCCGGGAAAAGAGCGGGCCGCCGCAAGAGGCGACGAGTCCCTCCTCCGAGATC  
TTGGAGGATGCGACGAGGAGCGCGGCGTTGACGCGAGGGGAAAGAGTAGAGGACGC  
GACGACGGAAGCGACGGATGCGAGTGACAAAGGCTCGAAGGAAGGTAGAAAGGTTA  
AAGAGAAGAGCGGCGGCTTCCTGTCCGGATTGTTCAAGGGGGCGAAGCACGCCGCGG  
ACGAGGCTTCGGAGGAGGTGAAGGAGGCGGTCGGCGAGGGCAGAGATCGCGCGAGA  
GAAGCGGTGGAAGGGAAAATCGAAAGACGCGGACGCGGCGAGGGACAAGGCTGCGTC  
GGAAGCGAGGGATGGAAGGAGAAGGCGATCGCTATTCTCAAGGACAGCAAAGACGC  
GATCGGTGGAAGGCGTCGGATGCCGGTAAAATTGCCGGAGAGAAAAGTGGCGGATGC  
TGCGAAACGGGTCGAGGAGAAGGTGGTCGACGGCGTGAAAATTGGAAAGGACGAAA  
TAAAGAAGATCGAGATAGACGTTAAAGGTGTCGCGGTGACAGGCGTAAACGGAATCG  
AGGATAAAATTGGAGAGAAGCTGGGCGAGGGTGGGCGGAAGGTGGCCGATACAGGA  
AGAGCAGTCGCGGACAAAGTAACCGAGGGGATAAAGGACGCGGAGTCGGGCGGGCG  
AAGCGTGACCGAGGGCGCGAAAGCGACCAAGGACAAGATGGTTAAAGAGGTTAAGG  
AGGACATCGAACTGGCGAGGCAGAAGACACCTTGGAGTGGAGTAGACTCGGCAGAA  
GGCGCGAAAGAGAGGGCCGCGAAGGAAGGCAAAAAGGGGAAGGAGAAGAGCGGCG  
GATTCCTCTCGGGACTGTTTCAGAAGCGCGAAACACGCGGCGGACGAAGTTTCCCAGG  
AGGTGAGGGAATTCGTGGAGGAGACGAGGAAGGAGGCTGGCGAGGAGGAGGCTCGC  
GCTCGCGCGGCAGCGGCGGAGAAAGTCGAAGGAATTGGACGAAGCTAAAGAGAACT  
GGTGAAAGACGGGAAGGAATGGGGCACGGCGAAAGTGTCGGACGTCGAGAAAACCG  
TTGGCGAGAGGGTAAGCGACGTCGAGAAAAAGGTGGACGCTGCGATTCTGTGATGCGG  
CCGAGGCCAAGGACGAAGCGATCGCGAAGCTCGCAACGAGCGCAAAGGACGTCGGC  
GATAAAGTCGCGGAGGGGGCGAAGGACGCCGAGGCGAGAGTGGAAGCAGCGAGCGA  
CGGCGTTAAGGCGGCCAAGGATAAAGTGTCCAAGGAGATGAGGGAAGAGGGCGAAG  
CGATGAGGCAGAGGATAGCGTCTGGGATAGACTCGGGCGTGGATGGCGCGGCAGCGG  
CGAGAGACAGGGCTGCGAAGGAAGCGAGGAAAGCTAAGGAAAAGGCCGGCGGTTTC  
TTGTCCGATTGTTCAAGGGTGCGAAGCACGGCGCGGATGAAATTTCCGAAGACGCG  
AAAGAGTTGGTGGACGAAACGAGAAAGGAAGCGGTGCAAGAGGAGGGTTCGATTTCG  
TGACCAGGTAACGGAAAAGTGGAAGGAAATCGATGCGACGAGAGACAAGGTTAAAG  
CCGTTGCGATCGACGTCGAGGACAAGGTTCGGCGAGAAGGTATCGGGTATCGCGGAAA

AAGTTGGAGACGCGGGTAAAGCTGTGGTCGAGAAAACGATACCGGACGATGCCGTGG  
AACGAGGCGCGACGATCGACGGCACGAGGATAATCGACGCAGCCAAGGATAAGATAG  
CGGATGTAAAAGCGGTGCGAAAACGAAGCCGCATCCGTTGCGAAGGACAAGATCTCCG  
ACGGTGCTCGGATGACGGCGGACGTTGGAAAAGCGGTTGGAGAGAGGATCGCGGACG  
GTGCGGAGAGGACGAGAGACGCGGCGCAAGCGGGCGTGCGTGAAGCGGTGGACGCG  
GCGAAGGCGGCAAAGGAGAAAAGTGGCGAAGGAGATTCGAGACGACGCGGATGCCGC  
GAAACGGA AAAATCTCGTCCGGCGTAGGGGCAGTGGTGGACGGGGCGGGCGGAGCGA  
AGGACAAGGCGGCGAGAGAGGCCAAGAGAGCTAAGGAGAAGGCGGGCGGATTCCCTC  
TCGGGACTGTTCAAGGGCGCGAAGAACGCCGCGGACGAAGTTTCGGAGGACGTGAA  
AGAATTCCTCGAGGAGACGAGGAGGGAGGCGTCGGAAGAGAAGAGTCGCGTACGAG  
ATGCGGTCGACGAGAAGTGGAAGGAGGGCAAGGAGGAGGCTGAGGACACTGTCAAA  
GGCGCTGAAGACGCGTTGCTCGCGAAAAGTATCCGACGCCGAGGGCAAGGTTGTCGAG  
AAGACGGCCGACGGAGTGAAGCGGATCGAGGGAAAAGCGGAGAGTATCGCTCGAAC  
GATCGACGGTGCGAAGGACGAGGCGGAAAAAGTTGCAAAAGAGACGAAGGACAAGG  
TGCCCGACGGCGTGACGCGGTGCTGGACGCGGCTGCTAAGGACAAGATCTCGAAAG  
AGGCCAGGAAAGGTAAAGAGAAAGACGGGTGGTTTCCTCTCGGGGCTTTTCAAGAGCG  
CGAAGCACGCGGCGGACGAAGCCTCGGAGGAGGCGAGAGGTTTGGTGGACGAGACG  
TGGAAGGAAGCGGGTGCAGCGAAGGAAAGAGCAGCGGCGGACGCGAGGGACGCGA  
AGGAGAAAGTTGCGAGCGCCGCGAGAGACGCGAGAGACAGAGTTGGGGAAGCGGCG  
GCGGATGGCGGGCGGAAGGTGTCCGAGGTTGGGAAAACCTGCGATCGAGAAAGCGGA  
GGAGGGAGCGAAACGGGCTGAGCGAAGAGTGACGCGCGTCGCGAAAGACGCGAGCG  
AGGCTGCGAAAGCGGCGAAGGACAAAGTGCTCGCCGACACTTTGGCCGCCAAGGATA  
GGATGGCGGCGACGGCGAAGGAAACGAGGGACGAGATCGGCGAGAAGGTGGCTGAA  
AGCGTCGAAAGGTATCGGACGCTGGAAGAGCCGTGGGGGAAGAGGTTACGGATGGC  
GCGAAGAGAGCCGTGGACAAAGCTGGGGAGATCGTCCGCGACGCGAGCAGCGGTGT  
CGAGGCGACGAAGGAGAAAGTGGCGCGGGAGATTAGGGAGGATGCCGAGGCTGCGA  
AACGGAAGGTGTCTCGTCCGGCGTGACGCCGTTGTGGACGGCGGCGCTGCGGCGAAGG  
ACAAGATCGAGAAGGAGGCCAAGCGGGCGAAGGAGAAGGGTAGCGGCTTCCTTTCCG  
GTTTGTTC AAGGGAACGAAGCACGCGGCGGACGAGGTCGCGGACGACGTGAAGGAA  
TTTCTGGAAGAAGCGAAGAGGGAATCGTCGAGGAGAAGACGCGCGTTTACGAGGCG  
ATGGAGAAGAGGATAGAGGACACGGCCGCGGCGAAGGACAGAGCGATTATCGAAGCG  
AAGGAAACGAAGGATAAAATTGCGAGTTCCGTGAGGGACGGCTTGAGAAAGTGTCG  
GATGTTGGCCGAGTCGTGCGTGAAAAGTTGGAGGATGGCGCGAAACGGGGCGGAGAA  
AGAATAGAATCTACGGCTCGAGAAGCGGTTACGGGCGCGAGGGATGCCAAGGAGAAA  
CTCGGCGAGAAAATGGCGGAAGTCGGCAAGAAGGTGGACGAAGGGATCGCGAGCGG  
CGCGAAGGCGATCGGGGACGAAACGAGAGCGGCGAAAGACAGGGCGGAGAAAAGAG  
GCGAAGGAGGATATGGCCGCCGCGAGGCAAAAGATCTCGTCGGGCGTGACGCGGCG  
ATGGATAGCGCGGACGCGGCAAAGGAGAAGATTGCGAGGGAAGCGAAGAAGGGTAA  
AGAGAAGGGCGGAGGTTTCCTCTCGGGCCTGTTT CAGAGGCGCGAAACACGCCGCGGA  
AGAGGTTTCGGAAGGGGTGGAAGATTTGGTGGACGAAACGAAGAGGGTAGCGGGCG  
AAGAGGAGGCTCGTGCTCGCCAGGCGGTGGA AAAAGCTGGTAAAGACGTCGAGGCG  
GCGAGGGAGAAAGCGGTTGCGGAGGCGAAAGACGCGAGAGATAAGACGGCGATCTC  
GATGAAACGCGGCAAGGACAAGGTGGGCGAGAAAAGCGTCCGAGAGCATGAAAACCG  
TAGCGGCGGTTGGCAAGATGGTCGTGATGAAGCGACGAAACGAGCCGAAGCTGTTG

TTGGAGAAGCGGCGGACGGCGTCGAAGCAACGAAGGAGAAATTAGCCGCGGATGCG  
AAGGACGCGAAGGACAACTCGCGGATAAAGCGGCGGACACTGTGCGAGCGATTGGG  
GAGAAAGTTAAAGCGGAGGAGGTTGGTCGAGGATCGGGCGATGGAGCGAAAGAGAG  
GGCGAGCGAAGAGGACGTCGATGGCGCGATATCGGCGAAGGAGAGAGCCGGCAAGG  
AGGGCAAAGGGCTAAGGAGAAAGGTGGCGGCTTCCTTTCGGGATTGTTCAAAGCCG  
CGAAACAGTCGACGGAGGAGATTCGGACGATGCGAAGGACTTCCTCGAAGAGGCGA  
GGAGGGAGGCGTCGGAGGAGAGCGGTCTGTCGCGACGCGGCCGACGAGAAGTGG  
AAGGGCGCGAAGGCGGCGAAGGACGAGGCGATCGAGGGCGCGAAAGACAAAGTCGT  
CGCCTCGGTGAAACGCAGCGAGGACGCGATCGGTGGAAGGTGTCGGACGTCGCGCG  
GCAAGCGACGACGTTGGAAGAGCGTCGGCGACGAAGCGAGACGCGCGGCGGAAA  
TAACGGAAACGAGGATCCGAGAGATGGGCGACGGTGCGAAAGCGACCAAGGACAAA  
GTGGCCGCGGACCTCGAGCGCGTTAAGGCTGGAGCGGCGACAACCGCCGAGGACGCG  
ATGGCAACGATCGGCGAGAAAGCGCGCGAAGGCGGCAAAGCCGCGATGGAAGGTGC  
GAGGAGGGCCGAGGATAAAGCGGCGAGGGAAATGGAAGCTGGAAGAGAGAAATTT  
CTTCGGAGATGGATAAAGCTGCGGAGAGCGTAGCGGCGGCGAAGGACAACTGGCGA  
AGGAGGGTAAGAAAGGAAAGGAAAAGGGCAGCGGATTCTTTCCGGACTGTTGAAG  
AGCGTGAAGCAGGCGGCGGACGAGGTATCGGAGGACGTGAGAGAATTCGTGGGCGA  
GAAGAAGAGAGAGGCCGTTGAGGAAGAGGCGCGTGCTCGCGAAGCAGCGTCCGGAA  
AACTTAAAGATCTCGGTGCGGCGAAGGATAAAGCGGTCTGGTGAGGCGAAAGAGGCGA  
GGGATAAAGTTAAGGACGCGGTGAAGGATGGGAAGGAGAAAGTGGAGGAGAAGGCG  
TCCGACATCGCGCGACGAGTGACGGATGCTGGCGAAGCGTTGGGCGGCAAAGTTTCG  
AGCGGCGCGAAGGACGCCGAGGCGAAAGCGGAGGCGGCCGTGAAAGATTTGGCGGA  
GGCGAGGGACGAGGCAACAGCCGGCGCGAAAGACGCGGTGGATAGAGGCGCGTCTC  
TGGTGAAGGGCGCCGAAGAGAGGATCGGCGAGGCCGTGTCCGATACCGCGCGGAAGG  
TGACGGATGGCGGGAAAGCGGTTGGAGAAAGGATCGCGGACGGCGCGAGGAAGGCG  
GAGGAAAAGATATCCGGTGGCGCCAAAGCGGCCAAGGACGCGGTGGTGAAGAAGT  
GAAGGAGGACGCCGAAGCGGCGAAGGAGAAAGCGGCGGCGGCGATAGACGCGGTTA  
CGGACGGGGCAACGTCCGCCAAGGACAAGGCTGGGAGAGAAGCTAAGAAAGCGAAA  
GAGAAGAGCGTCGGCTTCCTTTCGGGTCTGTTCAAGGGAGCGAAGCACGCTGCTGAC  
GAGGCGTCGGGAGACGCGAAGGAATTCCTCGAGGAAACGAGGAGGGAAGCGACGGA  
GGAGAAGAGCCGTTGCGCGAAGCGGTGGAAGGGAAGGTGAAGGACGCGGAAGCG  
GCCAAGGACGAGCCGTGGCGGACGCGAAGGACGCGACGCGAAAAATTGTGGGAAT  
CGCGAAGGACGCCGGAGACAAAGCGGCTGGAAAAATATCCGAGGGTGTGGAGAGAA  
CGACGGACGCCGGCAGAGCTGCTGGCGAAAAAATCGTGACGGCGCGAAGCTCGTGC  
AGGCGAAGACGAAAGAGGCAGCAGATGCCGCAAAGGACAAGCTGGTTTCGGATACG  
AGAGAAATTGGTGAGAGGATCGAGTCTGCGGCGAGAGACGGCAAAGATCGAGTCGGC  
AAAAAAGTGAAAATGGCCGAGGACGAGACGGTGGCCGTGCTCGGGATATAGCCGAC  
GTTGCCAAAACGACAAAGGACAAAGTCGCGAAGGGGGCGAAGGAGGGCGTCGACGT  
CGCGAAGGAGAAAGTGTCGTCCGGCGTCGAATCGGTGGTGGACGGTTCGTGAGTAC  
GAAGGAAACGATCTCGAAGGAAGCGAAGAAGGCTAAGGAGAAGGGCGGCGGTTTTT  
TTTCCGGCCTGTTCAAAGGCGTGAAACACGCGGCGGACGAAATTTTCGGAAGACGGGA  
AACACTTGGTCGACGAAGCGAGGAAAGAAACCGCGGAAGCGGGCGAGAAATTAGGA  
AAGGGCGTCGACGCGACGCGGGACAAAGGAATCGCAATCGCGAAAGACGCGAAGGA  
TAAAGTCAGCAACAAAGTGTCGGAAGGTGTGCAAAAAGTATCCGACGTCGGCAAAGC



TGTTGGCGAAAGAGCGACGGATGGCGCGAAAGAAATCGGCACGGGGATGGAAGCCG  
GTGCGAGACGAATGGGAGACGCTGCGAAAGCGACGAAAGATAAAGTGGCGGCTGGT  
GTGAAGGATTGCAAGGACGAAGCGATCGCCTCTGCGAGGGATGCCAGGGATAAACTC  
GCGGAGAGAGTAGCGGAGGGCGGCGAAGCGATTGGGGAAAAAGTGGCGGCTGGCGC  
GGAGAGAGTGGAAGCGGCCGTTGAAAAGCGGCGGACGAGGCGAAAGAGACGAAG  
GAAAAAGTACGCAAAGAAATTGGAGACGATGTCGAAAGCGTGAAGCGGGAAGTTTCC  
TCGGGGGCTGGTGCCTGGTTCGAGGGTGCAACTTCTGCGAAGGACAAAGCGACGAAG  
GAGGCTAAGAAGGCTAAGGAGAAGGGTAGCGGCTTCCTTACAGGCTTGTTCAAGGGC  
GCGAAACAGGCGGCCGACGACGTTTCCGACGAGGTGAAAGAATTCCTGGACGTGACT  
AGGAGAGAGGCAGCCGAGGAAGAAGCTCGAGCCCGCGAGGCGAGGGACAAGGCAG  
CTGCGGACATCGAAAAAGCAGTAGGCGAAAAGGCGTCGGAGGTTGGCAAAGCGGTTG  
GCGAGGGAGTGAAACGAGTCGAGGAGCGGACAGACGCTGCGATTCTGTGACACGGTT  
GATATCGCGAAAGCGACGAAAGATAAATTGATAACGACAGACGCCAAGGATAAAGCTG  
CGTCTGTGGTGAGAGACGCGAAGGATAAGGTTAAGGAGAAGGGAAGCGAAGGTGGA  
GAGAAAATATCAGAAGCGGTTAAACGAGCGGGAGAGAAAGTTGAGGACGAAAATGC  
AAAAGCGGCGAAGGAGGCAGAGAAAGTGGGAACGGAGATTAAGAAAGATGTGGACG  
CTGCCTCATCGGCGAAAGATAAAGCGGCGAGGGACGCTAAAAAAGGGAAGGAAAAG  
GGCAGCGGTTTCTTTTCCGGGTTATTAAAGAGCGCGAAGCATGCCGTGGACGAAGTGT  
CGGAGGAGGTGAAGGAGTTCGTGACGAAACGAAGAAAGAGGCCACGAAGGAGGA  
GGCGCGGGCGCGCGAAGCGTTGGCGAGGAAAGCGGATGCGGCGAAGGATAAGGCCG  
GTGCTGAGTGGAACGATGCGAAAGACAAGGCGAGGACAAGCGTGAGAGACGCGACG  
GACGCAGTCGGAGGAAAGATAACCGAGGGGGTGCAAAAGGTGTCAGACACTGGGAA  
AATCGTGAGCGGAAAAATCGTGGAAGGAGCGAAAGGAGTGGAGGCGAGAACCGAAG  
CGGTTGCTCGAGATGCCGTTGAAAGTGGTAAAGCTGCCAAGGACAAAGCAGTCTTCG  
AAGCGAAAGTTGTTAAGGACGCGCTCGCGACATCCGCCAAAGATGCTAAAGAGGGTAT  
CGGTGAGAAAAATATCGGAAGGCGTGAGAAAGTGTGCGGACGCTGGTTCACTTGTATCC  
GCCAAATTGGCGGAGGGAGCGAAGCGAATCGGCGGTGGAGAAACGGAATCGGTGCG  
GAGAACGACGAAGGACCCTCTATCGGAGGGAATCAAAGGCGACGCTGCGAGGGAGA  
AAGCGATGGACGATGGCGGCGAGGCGAGAGACAAAGCCTCGAAGGAAGGTAAAAAG  
GGGAAGGAGAAGAGTGGCGGTTTTCTGTGCGGGTTGATCAAAGGCGTGAAACACGCG  
GCGGACGAGGTATCGGGCGAGGTAAAGGAATCTTCGACGAGACGAAGAAGGAAGCT  
GTGGAGGAGGAGGCGCGCTCGCCGAGCATTGGTCGCTAAAGCGAAAGAGGCGGA  
GGCGGTTAAGGAGGAGATCGCGACTGGCGCGAAAGACGCCAAGGAGAAGATCGGTG  
AGAGAGTAACCGGTGGCGTGCAGAAGGTGTCGGATAAACTCGTGATGGAGCGAAGA  
TGGTGGAGATAAAAAACGGAACCTCGAGCGCGAGAAATCGCCGAGTGCGTTGAAGCAA  
CGAGGGACAAAGTGATCGCGGATGCGAAAGATGGCGGCGAGAAAGTTGCAACTGCGG  
CGAAGGATACGAAGGAGAAGATCGGTGAGAAGGTGTCGGGTACCGCGCACGCGGTGT  
CGGAAGTTGGAAGAGCTGTAGGCGCTAAAATTACCGACGGGATAAAGAAAAACGAGG  
CGAAAGTGGGAACAATCGGTCAGGAAGCGAGCGATGGAGCGAAAGCGACGAGGGAT  
AAATTGGTGAAGGAAGTGAAAGAAGACAGCTCGATCGTGAAAGAGAAAATCTCGTCT  
GGGGTGGATACCGCGATGGATGGCGCGAAAGCAGCGAAGGATAAAGCTTGGAAGGAG  
GGTAAGAAGGCGAAGGAGAAAAGCGGTGGTTTCTTGTCCGGTTTGATCAAAGGCGCG  
AAACACGCGGCCGATGAAATATCCGAGGATGTCAAAGATTCGTGGACGAGACGAAG  
AAAGAGGCAATGGAGGAAGAGGCTCGCGGCCGCGTGCGGCGCTCCGAAAAATCGAA

ACAAGTCGAGATCGCCGCGGAAAGTGGGAAAAGCGGGAAAAGCGGGAAAGGCAAGG  
TTAAAAGTGCGCAGAGAGCGTCGGATTCGGGTAAGGCTGGGAGCGAGAGAGACGCCG  
GAAGAATTTTTGGAGAGAAATTGTCTGAATCAAGCAGGGCAGAGATTCATCGCGGTAG  
CAGCGACCCTAAAAGCGCCGTGGCCGAGTTTCTGGAAGAAATGAAACGCGACTCCGC  
GTGGGACAAGGTGCACTTCCAACACGAGCCGGACGTCCACTTGTACGAAAACGTGGA  
CACGATGTTCTGTGAAAGAGAGGAAAGAGGAGGGTGAATCGAGAGAGGGTGGAGCGG  
GGAAACACGAGAAAGAGTCAAAAAAATCGGCGACGAAAGTTGCTTATTCGGTTTTTCG  
ATCCACTTTCTGAGCTAGATTCCGAGGACGGGTCAGGCTGTCCGAAAGAGAGATCGA  
GGACAGCGATGGTGGCGGGGAATCGATGTTCAAGAAAGTATCTCGCATTCCACAAAGA  
GTTAGTTCCTCGACGGAACGGGTAGCCCTAGTAGTTCGTCGGATAGTAGTAGTTCGAC  
AGTTAGGATATTAAATGTATTTAGAAACGTAGAGCACCTCGAGCCTCGCACACGACAA  
ACCGTCACCACAGTCGTAACAAAGTCTGTGCGGACGGCAACGACCCCAACCCAGT  
CCCGCCGAGTACACTGACAGTAGAATTGAAGACGTAACCGAAGAGGCGGCAAGACGA  
GCCCAGGATCTAGCCGATCAAGCACAATCATTGGCGAAATCAG

>novel\_circ\_000650

ATGGTTTCCGGAAAAACGATCTCTCATGCATTATATGCTCAAACCCAACTAGATCATGTG  
TGTGCTCTGGATATCGATGCTCCTATAGGAGCTGTCCGTCTTTCAGGGATTATTTGTACA  
ATTGGACCAGCTTCAAGATCTATTGATATGCTTGAAAAAATGATCGATACGGGTATGAA  
CATTGCTAGATTAAATTTCTCGCACGGAACCTCATGAATATCATGCTGAGACTATTGCTAA  
TGTGCGACAAGCACAGAAAAACGTTTCCTCTAAAGCTGGATTAAGCATTCTGTAGGA  
ATTGCTCTTGATACTAAAGGTCCTGAAATCCGTACTGGACTTTTAGAAGGTGGTGGAGC  
TGCTGAAGTCGAATTAAAAAAGATCAACTTTTTAAATTGTCTACTGATAAAGCATATG  
CAGAAAAAGGCACTTCAAGTATTGTTTATGTTGATTATGAGAATATTACTAAAGTTTTGA  
AGCCTAATAGTCGCGTTTTTGTGATGATGGTTTAATTTCCCTTAAAGTTACTGCCATCC  
ATCCTGAATTAGTTGTAACGTGTGTTGAAAATGGTGGGATGTTGGGTTCCTGTAAGGT  
GTCAATCTACCAGGTACTCCTGTAGATTTACCTGCTGTTTCTGAAAAAGATAAGTCTGA  
TTTAATATTCGGTGTTGAACATGAAGTTGATATGATTTTTGCCTCGTTTATACGAGATGC  
ACACGCTTTGACAGAAATTCGAACAATTCTTGGTGAAAAAGGAAAAAATATTAAAGTA  
ATATCTAAAATTGAAAATCATCAGGGCGTAGTAAATATTGATGAAATTATTGATGCTTCT  
GATGGTATTATGGTAGCACGTGGTGTCTTGGTATTGAAATACCACCAGAGAAAGTATT  
CTTAGCTCAAAAATCTGCTATTAGCAAATGTAATAAAGTTGGAAAACCAATAATTTGTG  
CTACACAAATGCTTGAATCTATGGTGAAAAAACCACGTGCAACCAGAGCTGAATCATC  
TGATGTAGCTAATGCTATTCTTGATGGAGCAGATTGTGTTATGTTATCAGGAGAACTGC  
TAAAGGAGATTATCCATTGGAATGTGTACTCACAAATGGCTAATATTTGTAAAGAAGCAG  
AGTCTGCAATCTGGCAAACACAATTATTTACGAGCTTTCAATGAAAGCAATACCTCCA  
ATTGATGCTACACATGCCGTAGCGATTGCTGTTGTAGAAGCATCTGTGAAATGTTTAGCT  
AGTGCTATTATAGTAATTACAATACTACGGCCATTCCGCGTATTTAATTTCTAAATACAGAC  
CACGTTGCCCAATTATTACAGTTACTAGACACTCCCAGACTGCACGACAATCACATCTT  
TATCGTGGGATTTTGCCACTTCACTTTGAAGAACCACGATTAGCTGATTGGGTAAAAGA  
TGTTGATGTACGTGTTCAAGTTTGGTATGAAATTTGGCAAAAATCAAGGTTTCATTAAAC  
CTGGAGATGCAGTTATAGTAGTCACTGGATGGAGAAAAGGCGCCGGATTACGAACTC  
ACTTCGTATTGT

>novel\_circ\_000651

GTGTTCCATTTTGCTATGTGTCTCGGACGACTTATTTGTCAACGTCGTTTACCTGAATAAAG  
TCTGTTTCTTATTTGTCTCCTGAAAGAAAATGGTCAACCCTGGGAATACTTTACGGAAT  
TCGTCAGACGAATGAATCGTGCAACGAGATAAATGTATCCTTCCACCGACGCACGAAA  
GGTTTAATACTATTAAAGGAGAAAGAGAAAAAAGACATGGGAAGAAGCGGAA  
AAAATTCTTTTGATGGAATTGAATAACGCGGTTGAAGAAGAACGAAAATTGATCCCTC  
GACACCTAATCGTCTAATCCTTCTATTATTATTACGAGGCGAGAATTTCTTCATTTTTGCA  
CCTTTTGAAAAAAATGTTGAAATCTTGGAAGTATTTATAAAATATATCAATTATATATT  
TATAAAATATATCAATTATATAATGATAAAAGTATAATATTAATATTTAATATTATTGAATA  
AATGTATTCTGAATTGCATTACATGAACGGCGGATGAAGAAGAGGAAGCACTCGTCGATA  
TTACCCCTGGATCTCGAGGCGTATATATACGGGCGTATTTACGCTGTGGAACATGCAAT  
TTTGGCGTACGACGTGTAAATACAGACGTGTCATTGGACAACAATATACCCGTGGGATT  
CAAAGCCTGATCTCTCGGTGTCAACGACCACGGTATTCTGAATTTTCGATGGTATTCC  
GTGACGACGACGAGTAAATTATCGCTAAACAGTGTACCGGCGGATGTCAAGATGCGGG  
CCTCGTTTCGGGTGGTTCGTGGGATCTTTCATCGACGACCCTTTCGAAATACTAGAATATG  
GAACAGAATCTTTCTTAATCATCGTCGAACAAACAAACGGTAGAATTTTTTTGGGGA  
GAATTACGAAGAACGAAAGAGGGTAGGATTAAGTAAATTTAAATTTAATACGATAAATT  
TTAATAAAAGATATCACAACGCGTTGAAATATCACTAGATGTCACTAACTAATTTTCAGA  
AATACAATTTCAATATTTTCTAGCCAATAACAAATGAAAACATTGAAAATCTTCATCAAA  
GGAGTTTGATTGAAATTTATGGAGGCTGTTGCGAGTAATAAAAATCAAGCATGGACTGG  
TAGATATCATCTAG

>novel\_circ\_000652

ACATAATAATACGACACGGGACGTTTTGAGCAACACGTATAGTTCATATAGAGTCGCGT  
CTGATTCAAAGGATGCAGAGTATCAGTACAGCGTAAATTATAGCAATATACAAGAGAAA  
AATTATCTGCAACGAAGTGTTTCTGCGGACAATGTTGTAATACGTTCCCGCGGTTTTAA  
ACCCTCTGATAGGCACGATCCCGTGAAGAGGAACTTCCTTGAGAATCTTACTTCAAAA  
ATATTGCATTTTCGATATGGAGAGTAATGAAAGTGCGCCAGTCAACTTACAAAAATTACT  
CACTCCTGCTGCAGATTTCGCAGGGAATTATGCAATCTAAAAATAGAAAAATGTTTGCAT  
CTTCATATTTTTACGCGCCAACACATCCAACCGTTGAGGATCAAGTTGAACTCGCTCGG  
CGAATTTTCGATTCGTAAAGCGATGTAAAAAATATGAAAAGTAAAGGTCAATCTATGTA  
TGTGAACAGAAAAAAGATCGGTTAAATGGATTTCATGATGGCAATGGCGTAGAAGAC  
GCAGAAGAACCCTTTAACACCTGTTTCACAGAGATAAAATTCATTAAAATGCATGATGAA  
CCCGCATGGAAAAGTATTGGATATACATGGTATTCAAGCTTTAGGGGAAGAAGTAAATA  
TAGAACCAATGCCAAAAAATCCCGAAAAACTTTTTGATATCGTTTCGTGATTTAAACAAT  
CAAAGAGGGCCGTGGTGCTGAAATATTCGCAAAACGCAGAAAAAGATCTGAGAAATGG  
GTTGTAGACAAAGATCAACCACAAACGCCAAACACACTTGGTATGCCAAAAATGCCAA  
TATATATGGGAAAATCGATACAGGAAATGAATGGCAGTTCAAAATATTCAAGTCTTCCTT  
CGCCTATTGTACCTGAACCAACCAATGAGAAATCATTTTATAATCCTTTTACCGTGGACT  
TGTCTTTAGATAATATAAATCAACCGACGACAG

>novel\_circ\_000653

GTGACCGACTCGAAGGATCTCCAAGTACCGTTCAGCACCGCGGCATCTCTCGGCTACG  
GCCTCCATCATATGCTCCACTTGCCACCCCAATTTCTCCACCCTTTGGATCACCGTCTGC

CGTTCGGCGGGTTTCAGGCCCTCGGCCCTCTGCCTTCGCCCCGCCTAGCAAGTGTTT  
GAAAGTAGAGACCGGGAACGGGCCCCGTGACCGGGTCCGGTTTGCCGAGCATCGGCTC  
GCTGTGAGCATGTGCAACATGTTCTCGCCCTCGTCCCTGTCTCCGCGAGCGGAGGC  
GCCGTGGTCTCCGTTTCCGGGGCGTCGGCGAGCATCGGGGGCGTCGGAGGCGTCGGG  
GGAGGCGCGGGCGGCGCGTCGGGGCAGGAAGTGGCGCCCCAGAGCCCGGCCGGGTC  
CGCGAGCCGATCGCCCACCGGGACGGGGACCGGTTCCGTCCCCAATCGAGGTGCCAC  
GCCGGACGACGAGGATCGGGACGCCAATGCCACGCCTGGATCCGAGAACACCGAGCG  
CTCCACGCCCCGAGGAGGGACGCCCTTACAGAC

>novel\_circ\_000655

GTAAAAAGAAATTTCCATCTGATCCATCCTGCTGTCCGGCATGCGGAGTGACCGTAAG  
GCCGCAGGAGCTCGAGCAACATTTGCCCCAGGAACTCGACAGACTTTACAAGATATCC  
TCGGCTTCCTCTCGGGCGCGAGCCTCAAGATCCAGCTTGCCACCCGGCCATCCCCAGG  
ATCATCCTCACGGGCCCCATGCTCCATGCACCCTCGACCGCCGATGGCACGCCTCATGGA  
AGATGGGAGACTTACAAAAGGATCAAGGCCAATAGACAGGCTAGAATCCGCGTGAAG  
AACCGGAAACGGAAAGCGGACGAGCCATCGTGCCCCGTGTGCAGCGAGAGGCTATCC  
GGCACGCCCCGAGGAATTGAACCAGCACGTGGAGAGATGCTTAAACAAACACAATAAC  
GGAAATCCTGCCGGCCAAAACAATTTGGACGAGGAGGAGGTGACGTGGAGGGCGAT  
GCGGAAACTTTTCGAGGAATACGAGTGGGCCGGGCAGAGGAGAGTGCGAGCGTCGTCC  
ATGCTCGTAGGAGGATTCTCCGCCGACAGTTTGGCGACGTGTCGAGCAATCGTTCGT  
CGGCCGGTGGCAACAGCGGATCGAACCACCAGGAGGAGGAGGACGTGGATCTGGTG  
GTGGACGGGGACGACGCGGCCGAGTTCGGGCCGGCACAGTATTCCGAGGCCGACGTG  
GTCGCGCCTCGCATGGATGGGACGCCGAGGGAGCAGAAGGAGAGAGACGCCCTCCGG  
GAAGCGGTGATATCGCCGAACGCGCCCAACACGCCCCACACGCCCCACACGCCCCGAG  
CATCAAATCGGCCAAGGTTTGGTGGAGGTGAAGCCTGAGCCGGGGACGACGACCCCT  
CTCGGCCAGAGCGAGCAGGACGAGGGCGTCTCGACGTGCCCCAGAAGGGATGGCGA  
CACGCCGGTGATCGAGGCGCTGAGAGGAAGGATTCGGGAACCTCGAGGCGGAAATGCG  
CGGCCAACCGTTCAAATGTCTCATTTGTATG

>novel\_circ\_000656

GTAAAAAGAAATTTCCATCTGATCCATCCTGCTGTCCGGCATGCGGAGTGACCGTAAG  
GCCGCAGGAGCTCGAGCAACATTTGCCCCAGGAACTCGACAGACTTTACAAGATATCC  
TCGGCTTCCTCTCGGGCGCGAGCCTCAAGATCCAGCTTGCCACCCGGCCATCCCCAGG  
ATCATCCTCACGGGCCCCATGCTCCATGCACCCTCGACCGCCGATGGCACGCCTCATGGA  
AGATGGGAGACTTACAAAAGGATCAAGGCCAATAGACAGGCTAGAATCCGCGTGAAG  
AACCGGAAACGGAAAGCGGACGAGCCATCGTGCCCCGTGTGCAGCGAGAGGCTATCC  
GGCACGCCCCGAGGAATTGAACCAGCACGTGGAGAGATGCTTAAACAAACACAATAAC  
GGAAATCCTGCCGGCCAAAACAATTTGGACGAGGAGGAGGTGACGTGGAGGGCGAT  
GCGGAAACTTTTCGAGGAATACGAGTGGGCCGGGCAGAGGAGAGTGCGAGCGTCGTCC  
ATGCTCGTAGGAGGATTCTCCGCCGACAGTTTGGCGACGTGTCGAGCAATCGTTCGT  
CGGCCGGTGGCAACAGCGGATCGAACCACCAGGAGGAGGAGGACGTGGATCTGGTG  
GTGGACGGGGACGACGCGGCCGAGTTCGGGCCGGCACAGTATTCCGAGGCCGACGTG  
GTCGCGCCTCGCATGGATGGGACGCCGAGGGAGCAGAAGGAGAGAGACGCCCTCCGG  
GAAGCGGTGATATCGCCGAACGCGCCCAACACGCCCCACACGCCCCACACGCCCCGAG

CATCAAATCGGCCAAGGTTTGGTGGAGGTGAAGCCTGAGCCGGGGACGACGACCCCT  
CTCGGCCAGAGCGAGCAGGACGAGGGCGTCTCGACGTCGCCCAGAAGGGATGGCGA  
CACGCCGGTGATCGAGGCGCTGAGAGGAAGGATTCGGGAACTCGAGGCGGAAATGCG  
CGGCCAACCGTTCAAATGTCTCATTTGTATGGAGCAATATAAGAAACCGGTGACTTCCG  
TCTGTTGCTGGCACGTGCATTGCGAGCAATGTTGGCTACACACGTTG

>novel\_circ\_000657

TTTTACAGAAGAAGCAACGAACCGGAAAGAGGTTTCGAGCGTGGTACCTCTGCTCAG  
GGACGATGTACAGCTCTCCGTCGACGAGTACAGAAATAAGCTTTATTCGATGATGGACG  
AGAAGCATCGCAAGCATAAGAATATGTCTAAGTCCAGAATCAGGCGATTATCGGAGCA  
CATCAGGAAGGAAACAGTTAGTAGTAATAGTAATCCAGTTATCGGTCAAGGCGACGCG  
ATTGTTGGTAAAAATCTTACACACTCATATCAAGATTTACGTAAGGAGAGAGGTTAGAAG  
CGACGCATACGAGCCCTCTTACGTAGAAG

>novel\_circ\_000660

AGGCGGGAGTGCCACCAGAGCCGGAGGATTGCGTGAGGGAGGTGAGCGGCGTGACG  
GCGATCATTAGCAGCGAGGATGTGATAGACAGGAAGACGCTATCCGAAAAGGAAGGCA  
TCCCTCTCGATTGCTTGTGGAACATCACGGTCAAAGAAGGATGGAAGATTCAGCTGAC  
GTTCTCGGATCCCTTCAAACCTGCAACGACCGAACGAGTGCGACGCCAACTTCGTGGAC  
GTGTTCAAAGAACGCACTGACATGTCTCGAGAGAGAAGAATTTCTGCGGAAGTATCG  
CCGACACCGTCCTCATCGGGACCAATACCGCCTTTGTCAGGTTTTACACGGAGCCTAA  
AGCGCTGAACAGCAGCTTCGAGGCCGTGATGACAGCGCTCAGGGACAGAGATCCCGG  
AGACAAAC

>novel\_circ\_000661

ATAAACATGGAGGCCGTCACGTCCACCGACTACGACTCGTCCAATCTGAGCAGAAATT  
TCAATCAGGTGGGGTTCAACACGTACAACACTACTCCCAGTTCGAGGAGAAGTACAAGCC  
GCGGCAAGTGTTCAAGTACGGGGACGAGTATCTGGAGTACGGGCGGAACTCGGTACG  
GTTGGGGCCGAGCGAGAGGCTGGCGAGATTGTCGTCCGCGAGGCATCAAGAGGTCGC  
GGCTGGGAAGATCGATCAGAGGTACGCGAGGAGTCACTCGCAGCCCCGAGCGACAACA  
CCATTTCGAGCCACGAGACGCGGTCCAAGTCGCAGGATTCCCGCGAGTTGACCTTCTAT  
CAGATCGATCCGCCAGTTCCCAGACCGGAGAACGTCCACTCGAAGACGCATCGCGGT  
GTCGCGGTGGAGAAGGGTCAGGGCAAAAAGGAGTTGACCTTCTACGAGATCGATGGG  
CCCGCGTCGCAAGAAAAGGCGGGCGAAAGACGGCAAGTCGGAGGGAGGAGGAGGAG  
GAGGAGGAGGGAAGGACAAAATGGAGAAAGGGGCACAGAGGGACAAGGCGCCGCA  
CGCCGCCGGTGTTCTCCAGGAGAAGGCGCCGTGCCCTTCCAAGCACCCGAAGCAGGA  
GCAGAAGGCGATCGCGCCGCCCAATTACCAGCTGAACAGATCCCAGTCCGATCTGACC  
GATTGCCAACTGCCCAATTATTACAGGCATCGGAACAATCCTTACATCGATCCGCCCAA  
GTACAGGCAATTCGACAGGCCGCCGAGGTATCAGGAAACGCCACCGAGATCCTCCGA  
GCCACCGCCGAAGTACTCGGAAGTGGCCAGACGTCAGGACGACTACAAACGCGTCCA  
GGAGGAGAGGGGCAAACGGCAAGGTGGTGGAGGAGGAGGAGGAGGAGGAGGAGGAGC  
ATGGTAGTAGGCATCGGTAGCGGTGGTGGCAACGGCGGCGGGCGGCGGCGGCGGCGGT  
GGTGGTAGTAATCCAGCAGGGGAACTCATGGCGCCGAGACGCCCTCTAATCTGGCCA  
GTATCACGCCAACCGCGCGAGAAGCAACACGCGCTCCTTCGTGCGGGTCGCGGCTCCC

TTACAAGTCGTGCGACACGCGTTGCCCCAACAACAACAATAACAACAACAACAACA  
CACGACGACCACCACCACCAACAACAATAACAACAACAACAACAATAACAGCAGCAG  
CGGCGGCAACGGTGGCAGCAACTCGAACAAAGAGGAGGCGTATCAGGATGCGAGCG  
AAGAGGGCGAGGTGATATCCGGCGGTTTCAGGTGTACGGGGATTTTTCGAAAGCGAC  
GTCGTTCCATCATCACCATCACCATCACCACCATCATCATCATCAGAATCGGTGTTGAA  
CATCGGAGGCGGTTGCGGTGGCGGGTCGGTTGCCGTAATGCGTGCCAAAGTGGTTCC  
GGTGTGCCGTGCGACCCGTCGACGTGCGACAGGTACAAGGGTGCCGTGGATTGTCTGC  
TGAAGGCGAGCGAGGCGGTGCAAGGTCGCCTGTGCGACAGATCGATGCTGAAGATCG  
AGAAAGGGTCGAGCAAAGCGGCGGTCCACGGTGTGAGGGGCTGGTGGTGGTGGGG  
AAGTGCGGCGGGGATAGGATGAAATCGGGGCAGGAACCTCGGTTACGGGAAGCACGGG  
GAGCAAGTGGGCGGCAAGTCGAAGGGGCACGATGTCGGTCACGGGTTCAAGGTGGA  
GAACATGAAATACTACGGCGAGTTGAAGGGTTACGACTTGAAATCTTACGGCACTATC  
GACAAGCCGGGCGTCGTCTCTGCCCACGAGAAAGTCTCACTCGCACGGGGCGGAG  
AAGAACGGTCACGACAAGTGTCACTCGAAAGTGTCTCTGCTCCTCCTCCTCGTGCT  
CGTCCGCGATGCAGAGTTACGGCCTGTCCAAGGTCGGCGGCGGTGAACGTCCAGCCG  
AGAAGAGCGTGTACGCCGATCACTATTATCACCGATCGTCGCACTTGAAGCCGCAGAC  
CGCGTATCAAGTGTACCAGGAGACCAAGTACTCGTACAACGTGAGCGGGGTACCGGG  
GACGCCGGCGCAGGCGAGCGCAGCCGCAGCTTTCTTCGCAAG

>novel\_circ\_000662

GTATCTCATCCCTTGCGAGTTGTGGCGAGGTGGACGCGTTGCCGGAATTACCAGCCCA  
GGACGAGGAACGATTGCAACGCGCCGCACGTTTGTGCAACAAAGGCTCGTTTTGCG  
CCAATGGCTCACTGACCATGGCTTGCACAGCCATTATCAAAAATTAATGCAGATGGAAG  
TGATGTCTCTGGAGGATGTGTATTGGGTGGAGGATAATGCGGCACGGGCAGCCCTTGG  
CAAGGATTACCGCGATGGACCCAGGCCAGACAGACGTTGCCTACTTCAAAGGAAGAT  
TTAGAAACCCTCAAGGCTGATTTGTGGAGCGCCGTGGTGAAAAATAGCCAGCATCAAG  
ACGCTTGACATGGG

>novel\_circ\_000663

GTTACTTATTGACCAGAGTGGAGAAAAAGATTGGCTCCCCGAAAAACCTCTGTCGGA  
TCTGGGCTTGATCTCGTACCGCAGCTACTGGAAGGACGTTTGTGCTGCAGTACCTCTGCA  
ACTTCGGGGGCAAGGAACTCTCCGTCAAAGATATCAGCAAGGAGATGGCCATCGATTC  
GTACGATATCGTGAGCACTCTACAGGCCCTCGGTATGATGAAGTATTGGAAGGGGAAG  
CACATCATTCTAAAGAAACAG

>novel\_circ\_000664

TATGTTGACGTTGGTGGTCAACGTGATGAGAGGAGAAAGTGGATACAGTGTTTTAAC  
GATGTAACGGCAATCATATTTGTAACAGCATGTAGTAGTTATAACATGGTACTCAGGGA  
GGATCCGACAAAATTGAGACTCAGAGAAAGTTTGGATCTCTTCAAAGCATTGGAAC  
AATCGGTGGCTTCGCACAATTTCCGTAATTTTATTCTTAAACAAACAAGATCTATTAGCG  
GAAAAGATAAAAGCAGGAAAGCACAAATTAGAAGATTATTTCCAGATTTTGCAGAT  
ATCAGACACCGGTCGATGCTGGGGTGGTGGTGGATCCTTCGGAACCTCCTGACGTCAT  
GAGGGCCAAGTACTTCATTAGAGACGAATTTCTTCGTATAAGCACAGCGAGCGGCGAC  
GGCAAGCACTATTGTTATCCGCACTTTACATGTGCCGTGATACGGAGAACATCAAGAG

AGTGTTTAACGATTGTCGGGACATCATTCAACGGATGCACTTGCGCCAGTACGAGCTCT  
TGTGACTTCGTTCTGCGCAACGTGTCCTGTCATCTATTTCGTATAAAAATTACG

>novel\_circ\_000665

TTTTCTAGATAAGGTAGCCATTGTTAAACAACCGGATTACACCCCCACAGAACAGGACA  
TCCTCAGGTGTCGAGTCCTCACGTCCGGTATCTTCGAAACACGGTTTCAAGTCGACAA  
AGTAAACTTTTCATATGTTTCGACGTTGGTGGTCAACGTGATGAGAGGAGAAAGTGGATA  
CAGTGTTTTAACGATGTAACGGCAATCATATTTGTAACAGCATGTAGTAGTTATAACATG  
GTACTCAGGGAGGATCCGACAAAATTGAGACTCAGAGAAAGTTTGGATCTCTTCAAAA  
GCATTTGGAACAATCGGTGGCTTCGCACAATTTCCGTAATTTTATTCTTAAACAAACAA  
GATCTATTAGCGGAAAAGATAAAAGCAGGAAAGCACAAATTAGAAGATTATTTTCCAG  
ATTTTGCAGATATCAGACACCGGTCGATGCTGGGGTGGTGGTGGATCCTTCGGAACCT  
CCTGACGTCATGAGGGCCAAGTACTTCATTAGAGACGAATTTCTTCGTATAAGCACAGC  
GAGCGGCGACGGCAAGCACTATTGTTATCCGCACTTTACATGTGCCGTCGATACGGAG  
AACATCAAGAGAGTGTTTAACGATTGTCGGGACATCATTCAACGGATGCACTTGCGCC  
AGTACGAGCTCTTGTGACTTCGTTCTGCGCAACGTGTCCTGTCATCTATTTCGTATAAAA  
TTACG

>novel\_circ\_000666

GAGCGGGAGAGTCTGGGAAGAGTACCATCGTCAAACAGATGAGGATATTGCACGTGG  
ATGGTTTCAGCGAAGCGGAAAAGCGGCAAAAAATCGAGGACATCAAAAAGAACATCA  
GAGACGCGATACTGACGATAACCGGCGCGATGAGCACGTTAACGCCACCCGTTGCTTT  
GGAGGATCCGGCGAATCAGAGCAAAGTCGACTATATCCAGGAAGTCTCAAACCTCTCCG  
GACTTCGATTATCCCCCG

>novel\_circ\_000667

ATGTGCCGAGGATGGAGAAGTCGCCGCTGCTTGCGAACGGGTACAACCATCCGCCCAC  
GCACCTCAGTCACATGCAATTCATGCAACTGGGCGGACATCCGGGCGCAGGACACACG  
GCCATCCTGTCGCCGGCCAGTCTGCCGCATCATCTGCAGGCGCAGGCACAGGCGCGGG  
CCGAGCAGGGGCTCAAGGTGAACCCGAACATGTCCAACATGGAGGCGCTGGCGAGGT  
CCGGGACGGTTTGGGAAAACCTGCCGTGCTGCCTACGAAGATATTGTCAAACATCTCGA  
AAG

>novel\_circ\_000669

ATCATCCGAACGTCAAGTGTTACTTCGGCCACGGTGGCCTTCTCGGGTTAACGGAAGG  
GGTTCAGAGCGGGGTCCCGATGATACTGATGCCCATCTTCGGTGATCAATATTCGAACG  
CGGCCGCGGCTCAATACAGAGGCGTCGCTATTATCCTGGAATACAACGATTTACCGAG  
GAAAAGCTGAGAAGCGCCATGGACCAAATATTCAATGACACGAGGTACGTCTCCTTTC  
TCCGTCTGTTCTATTTTTGTATCACGTGTGTAAACGAGAGAGAGAGAGAGAAAGGGT  
ATAAACGTAGCGATCGCGAATTTAGAATTCCTTCGGTTGGTTATTTAAAGCGTAAATTCT  
TCACGCGTCACGTGTTTCGTCCACCGTGATCGTTGTGCCAATTACGTCCACCGTTCTCGA  
TTATCACGCCGTTGATATGTCGATGCATCGGATCGAGATGCACAGAGAGAGAGAAATAA  
AATAGAGAGACGGGGAGAAAGTGAAGGGAAATAAATCGAGACGAAAGAGAGGAAAAA  
AATAGGGGGAGGAAGGGACACGAAGCGACAAAAAAGGAAAATCGTATAATCTGGCCG

GATATTCGGTCCGTTGAATATCTCACGAGCTGTCCGGACGCTTGGATATCCGGCGAGTG  
CATCGTCGTTGCAACACCCCCGTTAATCCGTAAACTGGCGTTTTTCCACCTACCCTCTG  
CTACCCCTCTCCCTCTCCTTCTCCCTCCGACAATCCAACGGTTCGGACATTTCGCCCTTT  
CTCTCTCTTTTTTTTCCCTCCCTTCTCTTCCCTCCCTCGTCTTCGAGTCTCCTAAATTCG  
AGGCACGGAAAGAGCGCACGTGTCTCTCTCCTCGGTCCATCGACAAATACCAGGAGG  
CGAGGCGAGGCGAGGTGCGCGGCGTGGCGGCGGGTTTTCTCTCTCGTAGCACGGGGAG  
GTCGCATGGGAAATTTACGGGCCGCTAAATGTTTACGGGCGGAATCAACGCCGGTGG  
CTCGATGACGACGACGGGGGAAACCGGGACGAAATTAAATTCTACATTATTCAATGGC  
CGGCCGGGCCACGCGGATAACTTGTTAACCGCACACGAGCCGTGACGCGGCGATTGC  
GTTTACGCGCGTCAGGAGCACGCGACGCCGAATAATTGCTCGTCGCCCTCGTTGAATC  
TTTGAAAATCGTGCACACTCCTCCTTCTCGATTTTTTCTCTCAGAAAATGAATGGAAAC  
GAGATAACTCTTGTGTTTTCGTCCTCGTATTCTCGGTATTCTTTCCTCCTCCCTTTTTGGAA  
TTTGATGGAATAGTAAATCGGCCCCGATTACGTAAACGCGATATTACCCGCGCATTAGA  
AGATGGGAGAAGGAGAAGTGGAATAATTCAAGAGGGAGGGGAGAATCGAAACGCCAA  
TTTGTGGAGCGGGGCGAACCACGATTTAATTACGATGGCCCCGGCACGCGAGCCTCCAA  
GGATGAAAGCGGCTTAATAAATCAGCACCGGATATGAAAGCGTTGGCAGCATCGCGAT  
CAACGGGCCTCGTACCACTGTGTCCTGGTAATTACGACAGGGGTGGATTTACGAGCTG  
GCCGTCTTGAGGGGGATGGGGGAGGATGCTCGTTGTCCGTTGACAATGCACGCGCAAT  
TGTATCCTCCGTTTTACTCCACGCCTTGAATATTAATTAATAAATAGAGCCGTGTAATTGG  
ATGATCGCACGATTTGCACGATTGTCTCGTCCGCGTTACGTGATCGAAATACAGCGGGGGC  
CGCGTAATCGCCCGTCTCGATCGCGACAATCGATTCTCTCCTCCTCCTCCTTGTCTGTC  
GTTGGTTTTGTGCCACCGAGAATTTCAACACGCCTCCTGTCACGAGGCCTTGCTCCCCC  
CTCCCGCGATATTCTCCGTGATTTGCGCGGATTCTCACCGATCTCTGTTTCGATCGTGGCC  
GTTTCTGTGTTTCGTGGATCGAGCATACTCGTCGCGCAAGGGCAGAGGTAACGGCACGG  
TGAAATGCGAGATCCGGGGAGAAGCGGTCGGTTTCGCGTGTGCGCCGCGCAATCGTCGTC  
GCCGCGCAACGTCCCATGCATGCGAGTGATATAAAATTAACCAACGATTTGGAAACAG  
TGTTGGCCGGGATATGTGTGTGTGTGCGCTCGTTGTCTGGCCGGTGCTGCCGCGTAAT  
CACCACTTTTGCTTTGATTTATGGGCCCTGTTTTCTCTTCCCTCGCCCCCTATGGCCAAT  
ATGTAAGTTCCAAGTATAAGAAAGTCGTCTGTCGGGATAAACGCCGTAATGGTCGGACG  
ATAGCCTTCGATGGAAAGAGATACGTTATCGTGGGGGAAGGGAGAGGATCCGTGGCTC  
GGTTAAACGTCCATCGAGCCAATAATGGCCCGATCGGGATCGCGAAATTCCAGGGTCG  
ACAGTGTGAGAGTGGCCTCCATATAGATTCCCGTTCTCTCGTCCGCAAACCGTCATCCTT  
TGGTACTCTGGTTGATCGATGCGATCTTAAAACGTTATAACCAAAGTTATATTATCGTTC  
GTAGCGATTTCTCGAAGAGGGGAAGAAGACGGAAGGAAGACGGAGAGAGAGAGAGA  
GAGTTCGTGACCCGCGCCACGAACGACGTGCCGCTTGCTCGATCTCCAGTCTCTCCTT  
TCGAGGATCCCACGAGGCGACGCCAAGTGGTCATTCAATCCCCAACTTGCCCCGCGCA  
TGATTCGCTTGTAAGCCAACCTTCGAGTTACAGCCATTCCGCTAGAGATCAAACGGCAT  
ACACGGCTACTACCCGTCGCCTCTCCTCCCCCTCCGCCTTAAAGACGATCATATTCAGC  
TTGTACTTGCACGGCACTAACTGTACGATCGTAACGATTCCATGCTCCCGTGGTCGGAC  
AATAAACGTCTGTGGAAATTTCTGTCGAATTTATCGAGCCCTGGAGACATTCCAACGGCTC  
TTCCAGCTGACTCGACCAATTATTATTATTATTATTATCATATACCTTCTTCGCATCTT  
GTCCAACGTATCGAAGGGAGCATTCTTTTTCTTTTTCTTTTTCTTTCCTTCGGTATAATTAG  
CGTCATAATTAATTTTCGAGCAAGAAAGTCATCAGCTGCGCCATATACCACCTTCTCC  
GGTTTCTTCCGTTGATGAACCAAGTTCGGGGGATGATATTAAACGGCGCTATCGAATT



CGTCTCCCGGCCAGGAGAATTTCTCCAGACATGATTCGTGCGGCTGCAGAGAGGAGG  
AAACGTGTGCGTGCGAACGAGTTGCCACAAGCCGAAGCCAAGTAGTCGGGAGGATGG  
CGGCGGAGGGTGGTAGTCAAAGTTTCGACAGTTTGTAAAGGAGGTACGAGGCACGCCC  
CTGTTCCCCTCTTCCTCCTCCCGCTTCTTCTTCGGTTACGGCTGAGGGATAACATAGTGC  
AGCTCCGTCGTCGAGTTAGCTCTTCCCTCTCCTCTTTTCCTTCTTCCCTTCTCTCTTC  
TCCTTTATTGCTGTCTCCTTCCTTTATTCTCGCAACCCTTTCGCTTCAGTTTCACGAAA  
ATTCCACTCGCCCCCGTGCGCTCGTTTGCCGGGACATCCCCTAGCTAGGATTTATTTTCG  
AGAGGCGGAGGTATTCTTATTCCTCGCGCGGAATAAGGAGAGGAAGGTGGTTACCTTG  
CTTCTGCGGCTTCGACGACAGTGCTTGCCGCACCTGTTTCGCTCGTAAGGGACGCGT  
AATGGTCGAAGAGGGAAGAGGGGATGGAAGAGATATATATATATATAGGGGAGGAGA  
AGAGGGTGGAGAAAGGGTGGAAATGAACGCAAGGTCGGAGGAGACGCTGCGTAATG  
ACGCGTGGAACGTCCCCGCGTGGGGACGAGAAAGTAATTGGACGGTTGCCGGGGATA  
ACTCGGTTCCGCCACCCTCTTTGATGAATGGCGAGCGTTTCGAGTAGCGGTTCTCTTGC  
AAACTCTGTTTCTTAAAACCGTTCACTTCAAGATTCTCCAAGATTTCGTGCGTTTCAA  
ATGCGTGTCGAAGAGGGATGATTTTCGAGGATCGTGAGAATTATAATCTCGTATTCTGG  
AAACGAGGAAGATTTTCAAACGCACGAGAGAGATACTTGTGCGACTCGATTTAGGCGCG  
AACTTCGATAGTGTGTTTTCCCTCCCCACGGATGACCACGCGTCGGATTAAAAAGTTG  
CTTATTTGCAAATGGAATTTTCGCGTCTGCCGGTATTACATTCACCGGGAATATATTCCG  
TTGTGGAGTTATATTCGCGGGGCAAAAAGCCGGCTTTCACGGATCCGCTGAATTTCAAT  
ATTTAAGTTACGTGTACGGGTACAAGTGTTGAATAATGCATTTCGGCTCGATGTACATGA  
AAGCCGCATTTAGAAACCGCCCTAATACAGACGTTACGACCTAACATCTTTATACTTG  
CTCTCTCTCTCTCTCTATTTTTCTCTCTTTCTTTAGATCGAACGTCGTTTCGATAATAAT  
AATTGATAATTAGGATGGAACGTGACTCGCTTTGAGAGCTAGATTCGAGATTTTCTCGC  
TGCTATTATTTAATGCATTGCAGATCCATCTATAAAACGTGGGGAATGGAATCTGTCAT  
TAAGAGAAGGAAGAGGGAGGGGAGGGGTGAAGCTTCTCGTCGACTTGAAACGTATC  
GAAAATCTCGAAGTGGATACTCGAAAAGACTCC

>novel\_circ\_000670

AGGCTTACGTGAATCTGGGCGCGGCGCTGGCCTCGGTCGGACGTGGAACGGAGGCGG  
CTGCGGTTTTGCGGGCCGGCGCATCCTTGATGGTTCCGGGCTCAAGGACAAGAGGGC  
TCACGAGGCGGCGAGGGTGCAGGCTCTCCTTCAATTAGGCGCCCTCTACGCCGATCAG  
GGCAGATTACAAAGGGCCCTGTCCGCGTACAGAGAGGCACTTCACGCCCTCCCGGATC  
ACTATCCACCTCAG

>novel\_circ\_000672

AATCGGAACCGGCGATCCATCCGACATGCTCAACACCCGCACCAAAGGCTCGAAACC  
GATCATCCCCGAGGCGGCCAGGTTTCATCGAGGTGGCGACGAACAGCATCACTCTGCAC  
TTGAACGCTTGGTCGGACGGCGGCTGCCCCATGATCTACTTCGTGGTCGAGCACAAGA  
AGAA

>novel\_circ\_000673

ATGGTACAAGTTCATCGAGGGCTCGTCCCGCCGCCAACCGGTCCAATTGAACGAGCGC  
GTCCGCCAGGTTAGCGGGACACTGATCATCCGGGAGGCGCGTGTGAGGATTCGGGA  
AAGTATCTTTGCATCGTGAACAACCTCGGTGGGCGGGGAGAGCGTGAGACGGTGTTG

```
>novel circ 000674
```

[illegible]

CGGCCGACCGAATCGCAAATGACGAGAACGCCGCGGCCATGTCTCGTTTCAGATGGT  
ACAAGTTCATCGAGGGCTCGTCCCGCCGCCAACCGGTCCAATTGAACGAGCGCGTCCG  
CCAGGTTAGCGGGACACTGATCATCCGGGAGGCGCGTGTGCGAGGATTCGGGAAAGTAT  
CTTTGCATCGTGAACAACTCGGTGGGCGGGGAGAGCGTGGAGACGGTGTGACGGTG  
ACGGCGCCGTTGGGTGCGGAGATCGAGCCTAGCACGCAGACCATCGACTTCGGCAGA  
CCTGCTACCTTCACTTGCAACGTGAGAGGGAATCCGATCAAGACCGTCTCGTGGCTCA  
AGGATGGGAAACCGCTTGGACTGGAGGAGGCTGTGCTGAGGATCGAGAGCGTGAAGA  
AGGAGGACAAGGGGATGTACCAGTGCTTCGTTAGAAACGATCAGGAGAGCGCGCAGG  
CCACGGCGGAACTCAAACCTCGGTGGACGATTCGAACCCCCGCAGATTCGCCAGGCATT  
CGCCGAGGAGACGCTTCAACCGGGACCTAGCATGTTCTGAAATGCGTGGCTAGCGGT  
AATCCGACCCCCGAGATCACCTGGGAACTCGACGGCAAACGTTTGTCCAACACGGAA  
CGGCTTCAGGTTGGCCAATACGTGACGGTGAACGGCGACGTGGTCTCCCATCTCAACA  
TATCCAGCACTCACACGAACGACGGTGGATTGTACAAATGTATCGCAGCTTCCAAGGT  
CGGATCGGCGGAACACTCGGCGCGTCTCAACGTCTACGGTCTCCCATTCATTGCCACA  
TGGACAAGAAGGCTATAGTTGCCGGTGAACTCTTCGCGTCACTTGCCCGGTTGCCGG  
ATACCCGATCGAGAGCATCGTGTGGGAGAGGGACACGAGGGTGTTGCCGATCAACAG  
GAAACAAAAAGTCTTCCCGAACGGTACCCTCATCATCGAGAACGTGGAGAGGATGAG  
CGACCAGGCTACCTACACGTGCGTCGCGAGAAACGCTCAAGGTTACAGCGCTAGGGG  
AACGTTGGAGGTTCAAGTGATGG

>novel\_circ\_000676

TGGCTTGCGCAGAGGATGAATCGATGGGACCGGTATTTCGTCAAGGAACCACCAAATCG  
AGTCGACTTCTCGAACGGAACCGGAGCTGTGTCGAATGCCAGGCAAGAGGAAACCC  
CCAACCGGATATCATTTGGGTTCGTGCTGACGGAAGCGCTGTTGGGGATGTTCTTGA  
CTGAGACAGGTCTTGCCGAACGGAATTTGGTCTTCCCCCTTTCCGCGCCGAGGATTA  
TCGTCAAGAGGTTTCATGCTCAGGTTTACAGCTGTCTGGCGCGCTCCCCAGCAGGTTCA  
GTTACAGCCGAGATGTTAACGTGAGAGCCG

>novel\_circ\_000677

CAAAGGACATCGTTATTCGCAAACCTATTGGTGGTTCTCGTCGTGCAGCATGGCTGAGA  
AGAAACTCTTTATCGCTTCGCAGAAAGCGATAAAGTTTTTAAATATTTCTAATGATAAGT  
ACATGATACATCATTGCATTGATATGTTACAGATATTTGTATCAATATTATGGTATATCCTG  
TACAAAATAAACAC

>novel\_circ\_000678

GGATTCGCAATGGGTGCATATAAATATATGCAAGAACTTTATCGCAAGAAGCAAAGCGA  
TGTACTCCGCTTCTTGCTTCGTGTTAGATGTTGGCAATATCGTCAATTGACTAAAATGCA  
TCGTGCTCCTAGACCGTCTAGGCCTGATAAAGCACGCCGTTTAGGTTATAAAGCTAAGC  
AAG

>novel\_circ\_000679

GCAAGAAGGTGGAGGGTGGAATGGCGACCAGCAGCAGCGGACCAGTCGTGCAGAAA  
GTGAAGGTGAAGGAAGAGGGCGAAGGATCACTGTACGATGACGACCGGGACCACGTGC  
ACCACGACCACCACCGCCACGACCACCACCACGACCACGACCACGAGCACGACCACC

AGTAGCACGGGCACGACCGTGACCAGCACGAGCGCGAGCACGAGCACGGTGACCAG  
TTTGGGCGAGAGCATCGCCGCCCTCCATCAACAACCCTCCGCCGCTGTTTGTACCTAT  
CGGCGCCAGCGGCTTCCGTCTCTCGGCCAACGCCGACCCCTTCCCCGTCGATCTCGA  
CCTCAAGACCAAGATCAAGG

>novel\_circ\_000680

CGACGCAAAGGCCTCACCCACCACCAGTGCCGCCACGACCCAGTCGGCAGGTGGTTCG  
CAGAAGCCCTTAAAAGATCACCAAGGCCGCCCTGCCCGACCAGGCAGGCCCCACCAC  
CGCCCAACACCAAACCGTGGAGATCCGATCGAGATCGGGCGAACAATCGGCAACAGG  
TGTATCCCGCTCCTGTTGGGCGCACGCTTGTTTACGAATCTTCGATCAAAGAGTCGTTCG  
CTTCCCAAAGAAACGAGCAACGAAAGCGGCGGCGATTGCGATTGCCCGCTCGACAAG  
AATCGCGAACCCGTTTCTCGAGCCGCGAGTGAAAGGCGCGCGGACGAGGACGACTGG  
ACGCGTGGAATCCGCGGGAAAGGCGGCACCCGCGTACCCGACCAGGAACATCGGCCA  
AATTCCACTACTGAATCGAGCCCCAACACCGACGCCACCGCCGCCGCCGCTTCTTCCT  
CGTCTCCTCTACCGCGAGAGAAAGAGGATCGCTCGAGCCCGTGTCCTCTGTGTCTCT  
GCTCGAACATGCGCCCTCTAAAGAACGCTCCTTCAATGGAGCAACCACGTCTGGTGAG  
AGATCGCCGGTAAGCGAGAAATCGATAAGCAACGTCGACAGAACGTCGACTGGGACG  
AGCGAGAAAGCGAGAATCGAGTCAGAATCGATAATTTCTCGCGCGAAGGAAACGACC  
GTTTGCGACAACGATGCCAAAATTACTGGGCTCGAGTCGCGCGTATCTCTGGACGAGG  
TACAGTGTTGTACATTTTCGCCCGATGTTTCGGAATCGAAGAAAAGCGGGGAAAGGGG  
AGGCCCAAGTTTTTCAGAGAGAAACCAATGCTCGGAGAGAAGCAAAGCTGATGGCTC  
GACGCGATTGCCAACGCCAAGCCAGAGATCGTGTCTCGTGAAATATCGAGACTCGGCG  
AGGAAAAACGCGGAAAGTTCCACCGCGATCCAATCTTCGGTTTCGAACGTTGACCGTG  
CCACAGTGGTTGTTATCGACGAATCGGACCGTAAAGCCGCATCCAACGATCATCCTGAT  
CACTGTGACGATCGCAATCACACGTTAACCAACATAACAACAACAACAAGGAG  
AATGCGGAGAATGACAACGACAATGATAACATTCATCGACAAGACTGGTTGGAAGCCG  
GTGTTTCATTATTCGTCCACGCAGATCAGATTGTCCGGAGAAGATGGCGACGTTATCGAT  
GGAAGTCGAGTCAATGGATTTGATCGTTGTGAAAACGAGAAATTCGGGGACTTTAATG  
TTCCAAGCATACAAGAAAGGATCGCTATGTCTTCCCTGCAAGGTCTACCACCGTTACCG  
AGGAGTCTTAGTGGGTTCAATTTGAGTGGTGGACGAAGCGAGGGTTGCGAACCACCT  
CCGCCGCCCACTAGATCTTCCAGTAAAACGCAAAGAGGCGGTAAAACCCCGATCCAAT  
CATCGTCCAGGCCATCACCTCCTGCTAGACAGCTTACCACATTGGATACACAACCTGGCT  
ATACTGAGGAGAGAAATG

>novel\_circ\_000681

ACGAACGAGACGCGATACAAAAGAAAACATTTACCAAATGGGTGAACAAGCATCTGA  
AAAAGCACTGGAAATACGTCAAGACTTACACGTGCCTGCACGTGTGCGTCCTTGTCAA  
CAATCAACCATGCTGTTCCCCCACTGCAAGCAGACATGTCGGAGATTTGTTTCGAAGAC  
CTGCGGGACGGGTACAACCTCATTTCCCTTGCTGGAGGTTCTCTCGGGCGAGCATCTCC  
CGCGAGAACGAGGTCGGATGCGTTTCCACATGCTGCAAAACGTGCAGATGGCTCTTGA  
CTTTTTACGTTATAAGAAAATCAAACCTCGTCAATATACGCGCCGAGGATATCGTGGACG  
GAAACCCGAAGCTGACCCTAGGTTTGATATGGACCATCATACTGCACTTCCAGAGCTG  
GCGACGCAAGCATTCCTCTCCCTTGGCCAACAATTTCCAACATCTCTCCTCCGTCAT  
CTCATCTCTTAATAATCGTCCACCTCTCCGCCTTCCCTTCTCCCTCAACATCGCCTTCTG

GTCCAGTGAACATCACGATCCTCTTTCCAGTCGACGATCTACACACGACGAGCTACAC  
ATTCTCGCGCTATCGTCGATCGCTCGTTCCCTCCCATTTCGTACGTTTCGATAAGAATCGCGT  
TCGGTGAAACGATAATTTCGTTTTTTTTTCGAGTCTCGGCGCGGGATCTCCGTCCCGTTGGA  
GACGTTCGATTCTCGATAATCGGCTTTTCACGAGCGCGGCCGCGCGTGCCGTGAGTAATC  
GAGGAGGGAATCGAGACGCCGGATAAGGCCACGAATGAGTGGCCGTACGTGCCGAAC  
CTCTTTTCCCGGAGGTCGATGTTAGCTCGTTGCACGGAATCGGAATCCTCCCCGCGCGG  
AAAAGACACGAGAAGGGGGAGAAGAAAGGTTGTTGTTTCGTTGTTGTTGACAACAAC  
ACACCATCATGTCGATATATCGGTTTCAGCAAGGGCGGCCGGCTATTTCGTGCAAGGCACC  
AGGGAGGACGAGCCCCGCGAGAACGTCGTTTCGGCTGCCTCGACCGCCGCTACACCC  
GCCAACGACGATCTCAGAGCTATTTACACGAAGCGGAGGCTCTCGACCGAGGTTCTAG  
GATCGTCGATCGAGTCAACGAAGACGTCGAGGCGCGGCGAGAACGGGACCAAGCGTA  
TCGTGACACGGATCGTTTCGTAAAACGACCACCTTGACACGGGGCGAGGAGAGATGCG  
TGGCCGAGGATCTGACGAAACGCGCCGCATCCGGCTATTTACAGGACACCGCCGCCTC  
CTCCTCCTCCTTCTCTTTAAGCCGCCAGGCCTCGCCAAAACCGAAAACCGTCCGGATAT  
CCGATATCGTGGTTGGTCAGGAGCCTAACGTGACCGCCCGGGAGGCGCTTCTAAGATG  
GGCCAGACGATCGACGGCGCGCTACCCGGGTGTACGCGTCACGGACTTCACCGGCTC  
GTGGAGGGATGGATTGGCGTTCAGCGCGTTGATCCATCGAAACAGACCGGACCTGGTC  
GACTGGAGGAACGCCCGTGCCAGTCAACCACGAGAGCGGCTCGATCGTGTGTTCAAC  
GTCGCGGAGCGCGAGTATGGCGTTACGAGGCTTCTCGATCCTGAAGACGTGGACACCC  
CGGAACCGGACGAGAAGTCCTTGATAACGTATATCTTTCGCTCTACGACGTGTTCCCG  
GAGCCGCCGCTATTTCATCCGTTGTACGACGCCGAGGCCAGAGACGGTCCGAGGAGT  
ACAGGGAGTTAGCGAGCTCCCTCCATCTGTGGATCCGCGAGAAAATGTGCCTGATGCA  
GGAGCGGGCCTTCCCCCCCCACTCTGATCGAGATGAAGAAGCTCGCCGCGGACAGCAC  
GAAATTCAAGAACGAGGAGGTGCCGCCACGTTACAGGGACAAGCAGCGCCTCTCCTA  
TCTGTTTCAGGGATCTTCAGAAGTATTTTCGAGGCGGTGGGCGAGGTGGACATCGAGGCC  
GAGCTTCACATCGAGGTGATCGAGAAGAATTGGAACCGATTGATGATGCTTCACCAGG  
AGAGGGAACAGGCTATAGTCGATGAGATAAAACGGCTCGAACGGCTGCAACGATTGG  
CGGAGAAAGTGCACAGAGAGATGAAATCGACCGACAACCGACTGGAGGAGCTGGAG  
AGAAGGGTGGAGGACGAGGCGAGACGCCTCGACCGACTTCATCCTTTGGAGGCTAAA  
CACGCCGTGATCTGCTCGAGCAGGACATACGCAACACCGAGATACAGATTCAAAATA  
TTTTTACCGACGTGCACACTCTTACCGAGGGACGGTACAGTCAGGCGGCCGAATTGCA  
CAAAAGGGTTCAAAAGCTACATCAACGGTGGGTGCGCTGCGATCTCTTCTTCACAAA  
CGTTTGGTACAGCCGCTTTCGGCCGTCTCGTTCCCGGTCGAGGAACGCGTGGTGACGA  
AACACCGGACCACCGTGCACGAGACCCGATTGGTCGACACGAACCCGCACTTCCGCT  
CGTTGCACGACTGCATCGACTGGTGCAAGGCGAAGATCAAGCAGCTCCAGGACGCGG  
ATTACGGTTCCGACTTGCCCAGCGTGCAGAACGAGTTGGACGTCCACCAGAAGGAGC  
ACAAGAACATAGAACAGTTCCATCCAAAGGTGGACAGATGCGTGCAGGCGAAGAGCC  
ATTTCCACGGCGAGGAGTCCACCCTGTACAGCCAACATTTGGCCGTGCTTCAGAACT  
CTACACCGAGCTGTTGGCTGCCTCGAACAAGAGGCTCTCGGATCTTGACACACTGCTA  
GATTTCATACAATCGGCCACGGGCGAGCTGGTCTGGCTGAGCTCCAAGGAGGAGACCG  
AAGTGACCCGCGACTGGAGCGACAAGAATTTGAACGTGCAGAGCATAGAACAGTATT  
ACGAGCGCACGTTTGGATCCGGGATAGAGTCCCTGATGAGCGACCTGGAGAAGCGAG  
AGATCCAATTCTCAGCGGTGCAGGATCGGGGCGAGGCCCTGGTCCTCCAACACCACCC  
CGCGGCGAAGACCATCGAGGCGTACATGTCCGCCATGCAGAGCCAGTGGGCCTGGCTC

CTCCAGCTCACCTCTGCCTCGAGGTGCACCTCAAGCACGCCGCCAGAGCCAGCAAT  
TCTTCCGCGACGTCCAGCAAGCGGAGCAGTGGATCTCGAAGAGGGACGAGACGCTCA  
ACACAATCTACTCCCAATCCGACTTCTCGTTGGACGAGGGGAAAGTTGTTGAAAGG  
TATGCAAGAGCTGCGCGAGGAGCTGAACGGTTACGGGGACCACGTGCAGAAGCTGGT  
CGACCAGGCCAAGGACGTGGTCCCCATGAAGCAACGGCGCCAGCCCGTCACGCGACC  
CATGCAAGTCACCTGCGTCTGCAGTTACAAACAGGTTAACATGTCGATCGAGAAGGGC  
GAGCAGTGCACGTTGTACGACAACTCTGGAAGGATAAAGTGGCGCGTGAAGAACGAA  
GAGGGGATCGAGACGCCCGTGCCAGGCGTTTGCTTCGCCCTCCAACCGCCCGACAAG  
GACGCCCTCGAGGCCGCTGAAAGGCTGCGACGACAGTACGACAGGAGCATCGCGTTG  
TGGCAACGGAAGCAGCTTCGACTGCGCCAGAACATGATATTCGCCACGATCAAAGTGG  
TGAAGGGGTGGGATCTGCCGCAATTCTTGCGCATGGGCCAGGATCAGAGGACGGCTAT  
CAGGAAGGCGTTGAACGAGGACGCGGAGAAATTGTTATCCGAGGGAGACCCGGCCGA  
TCCCAATTGAGGCGGTTGAAGAGGGAGATGGCGGAGGTGAACAAGTTGTTTCGACGA  
CCTGGAGAAGCGCGCGAGGGCCGAGGAGGAGTCAAGAACGCTGGGCGTATCTTCAA  
CGAGCAGATCTCCACGCTTCAGCAGTCCCTGGACGAGGCTGAGAGGGCGTTGAACTC  
CAGGATAACCGCTCCCCTGCCCAGGGACATGGACACCCTGGAACACCTGGTGTTCAG  
CACAAAGACTTCGAGCAAAGCCTGAGACGGTTGGCCCCCGATCTGGACAGGGTGCAG  
CAGACGTTCCGTGGAATCACGTTGAAGACGCCCGCGATGAGGAACAAGCTGGACGCG  
GTGACCACCAAGTGGACCCAGATCTGGAACCTCGAGCAATCTGTACATCGAGCGGCTGA  
AGTGCCTGGAGATAGTGTTCGAGGCTCGAGGAGAACACCACGGCGATATCCGAGAT  
CGAGGTGAAGCTGGCCTCGTTCGACGAGCTCCCCTCCGATATAAAGGGGTGCAAAAC  
GTGTTGGAGGATCTGATGCTGCTTCAGAACGCCATCGCCCAACAGCAGACCGCGATGG  
ACCAGTTGAACGAGGACGCGCACAACGCAAGGAGGCTGGTCGAAAAGTCGAGATCC  
GGCCATCGTGGCCCACTCGGACATGGACCGTCTGGACGACGAGGTGAACAGGTTG  
AATCCAGGTGGACGAACATCTGCGGCCAACTGGTGGACAGGCTTCGTAGCGCGGAA  
ACGGCTTACGCGCTCGCGCAACAATTGGAACACGCTTACAGAAACGAGGTGCACTTC  
GTGGACGAGTCGTACAACAGACTCGAGATGGAGAATGCCAAGAACCTGTTGAACAGA  
GTGGTGGAACGAGCGCCTGCGATCGAAGCGGTAAATGTGACGGGCGGTGATTGATTC  
GCGAAGGAAAAG

>novel\_circ\_000683

CGCGCTCTCCAGGAGCAGAGGCCGCTGAGGACGTTCCGCACCGAGTTCAACATCTAC  
GAGAACAGCAGCTGCGAGGAGCGTTACACCACCACGACCACCCACTACACGCAATCG  
CAGTACAGTTTGGAACGGCACGAGCGGACAGAGCGCACGGAGAGGAGGGAGACGAG  
CGAGACCATAGTCTCGTCCAGCGACACGATACGTTCCCGGGAGAGCGGTCTAGAA  
ACTCGAAGCGGATCCGTCGGGCGGGATGCGGTCTCGAGAGAGATCGAAGAGAAAGCC  
TCCCGTAAACAGGAGGAGGAGGAGGAGGAGAAGAGGATCAGCGACGCCACTAGTAG  
CGAGCGTTTTAGCGAGATTAGGAGTTTAAAGAGGAGTTTAGAGAGGGCGGAGGAGG  
CAGCGTAGGTAGAGAGAGCAGCAGCGTGATCGACGCTAGGGGTATCGTGGATCCACGT  
AGCGGGCAACTGTTGACCGTGGGCGAGGCGATAAACCTTAGGATCTTGGACGTTAGGA  
GGGGTAGGATAACGTGCTCGAGGGACGGGCAGAGAAAGAGCGTGGCTATCGAGGAGG  
CGGCACGCGAGAAGATGATCGAGACGCGTCTCGCCGACCGTCTGCTGGGTCCGTGCG  
GCTACGACGAGGAGGGGCGGCCGTGTCCCTGCTCGGCGCGATCCAGCGGGAGCTGA  
GCGACGCCGAGAGAGCGGACGGTGCCGCGGCAGACCGAGCGAAG

>novel\_circ\_000684

CAAAGGCGCTGAACCCGAGTTCCGTAGCCCGAGAGTGAAACTTTTGTGGGATAGATGG  
AGACACGTTTGGATGTTGGCCTGGGAACGTCAACGCCGTCTACAGGATAAATATAATTA  
CATACAGGAGTTGGACCGAGTCGCGAACTTTAGTTGGGAAGATTGGCGCAAGAGGTTTC  
CTGAAGTTCATGAATCACAAAGAAATCAAGATTAAACGGATCTCTTCAGAAAGATGGATA  
AGAACAACGACGGTCTGATCCCACGCGAGGATTTTCATCCAAGGAATCATGAACACCAA  
ATTTGAGACTTCGAGGTTAGAAATGGGAGCAGTCGCGGACCTGTTTGACCAACACGGC  
GAAGGATTAATAGATTGGAAGGAGTTTCATCGCAGCTTTGAGACCAGATTGGGAAGAAC  
GTAGGACGTACAATGATACGGACAAGATCCACGATGAAGTGAAACGATTGGTGATGCT  
CTGTACTTGCCGACAGAAATCCGCGTGTTCCAAGTTGGCGAAGGAAAATATAGGTTT  
GGAGACAGTCAAAAGTTGCGATTGGTACGAATTCTACGATCGACCGTAATGGTACGAG  
TCGGTGGTGGTTGGGTAGCTTTGGACGAATTTTATTAAAAAATGATCCTTGCCGCG

>novel\_circ\_000685

CCAAGGGAAGAACGAATATCGAGCTGCGAGAGCAATTCATATTGGCGGACGGGGTCA  
GCCAGACAATGACGGCGTTCAGATCGAAGCCGAGCCCTACCTCCACGTTGCAGCGTAC  
CCATATCTCATCCGCGAGTGCCGGACCCATCACCAAGCGGAGGAGTTTATGAGCCAGC  
TGACGCCGATTTTTGAGAGTTTGAGGCAAAAGGAGGACCTCCCGTGCTCGTATCCCCT  
CCACATGCACGCCCCCTCTTATCATTGGTGGCGTTGATCGGAGATACTTCGAATCATCAT  
AAGCTACTATATCTGTCCCAACTTCCTCTGGTGAGGGAGCGAAGCGCGCGAAGCGTTC  
CAATGGGACAATCGCGGGCATCCCGCTCCTCGCTCAGCGCCGGCACGCCGGACAGCCT  
GAGCGACAACGAGAGTTCTTCAAGATTGCCTCTGCAAGGAAATCGAGCACACCGTA  
CAGAAGCACAATGACACCTGGAGGTAGCCGGCCATCCTCGAGACCGGCTTCGAGACC  
AGCGTCCAGACCGACCAGCAGGCCCGGAAGTAGGCCGGCGTCCCGACAGGGGAGCA  
AACCACCGAGTCGATATGGATCCACTCAATCGTTGGACAGCACCGACGAATCGACGAA  
CGTGAGCCGTATTCCGCGGAGAACGGCGGTGAGCACGACGGGAAACACTCCTACATC  
GAGCAGGCACAACAGCGTTTCAGGGAAACGGCTTGGAACGCCTGTGAACGGGTCTGA  
GTTTCGCGGCCCCGAACACCCACAGGGCTTGTTAGCCCCGCGAGTGGTGTCCCGTCCAG  
GTTTGGCACGATCCATAGAGCTTCGAGCATTCCAACCCTGACTGGTGTCTGGCACACCG  
ATCAG

>novel\_circ\_000686

CAGCGGCACAGGGTCGCGTGAGGAGACGCAGATGGACACGCACGAGGGGTCTGACG  
GTACAGCTGCAGTGCCGTTTCTCCCCGCCAGGGAGAACGTGACGTGCTTCTGGTTGA  
CGCACACGAACGATAATCACGACAACGCAGCGATCGACAATCTGTCTGTTATCGCCCCA  
GTACAAGGTGTTTCATGAATCTGGAGGAGGGTCGGTACGACCTTCAGATAAGGAACGTG  
TCGTACGAGAGGGACAACGGGAAGTACGAGTGCCGGGTGAAGGCGAGCGGGACGGG  
GCACGACCTGCACCGAAAGTTCATCGCTCTGACGGTGCTGAGGGCGCCCCGGGCCGCC  
CACCATATCCCCGACCTCGGCCTCGGCGACGGAGGGGCAGAGGCTCGAGTTGCAGTG  
CAACACGAACGGGGGCGAGCCCCGAGCCCGAGGTGAGGTGGTACCGCGGCAACGAGA  
CGGCCGTGCTCCACTCGGGCAGGACGCTGACGGTGAGCCGAAGAAGGAGGACGAC  
GGGGCGACGTTCCGCTGCGTGGTGCAGAACCGGGCGATGCGCGAGGGCGAGACGCTG  
AACGCCACCGTCACCCTCGACGTCAACTACTTCCCCCGGGTGGCGGTCTGGGCCCGAG

AACCCCTCAAGGTGGAGGTGAACGGGACGGCGAACCTCGAGTGCCGCGTCGACTCG  
AAGCCGGCGGTGGGCATGGTGAGGTGGTGGAGGGACGGCAGCTTCGTGGCGACCAGC  
TTCCAGCACGCGATTTCGAAGGGTGGCGGTGCAGGACGCGGGCAAGTACACCTGCCAG  
GCGGACAACGGGCTCGGCAAGAGGGGGGAGAGCTCCCTGCTGCTCGACGTGCTGTAC  
CCGCCCACCGTGTTCGATAGAGGGCGAGCCGCTGAGGATCGCCGAGGTCGAGGACACG  
GTGACCGTGCACGTGCAACGTGACGGCGAACCCGCCGCCCTCGGTGGTCGAGTGGCTG  
CGCGACGGCCGCCCGACTTCCGCCAGCTCGGCTCCATCCTGCGGCTCAGCCGCGTCA  
CCGCCGACCACGCGGCCAACTACACCTGCCGCGCCGTCAACGCCATCCACCCGTCTGGG  
CGGCGAGCGCAGGAACCTACTCGGCCACCGCTCGGCTCACCGTGCGCGTGCGGCACAA  
GCCGGGCCCGGCGCGGGTCAACCCCGACTCGCCCGTCGCCGTGCGAGGGTTCCAAGGT  
GATTCTCACGTGCATGGCGAGCCCGGCCGGCTACCCGGAGCCCAGGTACAAGTGGTGG  
AAGGAGGGCGAGTCCGGGACGATGCCCTCGGTCAACGTGGGCCCCAAGTACGAGATC  
GACTCGGTCCACTTGGGCAGCGAGGGGACGTACAAGTGCCACGCGACCAACGAGATA  
GGGAACGGGGAGGCGGCGTCCGTCAACCTCACCGTCCACCAACCGCCCAAGATACTC  
ACCAAGCTGCAACCGCACGTCACCAGGAA

>novel\_circ\_000687

GATCGAAACACAGAACGAGTCGGAAGAGAAAGAAGGAGACTCGAGAATTGTTGCTC  
GCCTCCTTTCCGAGGCGTCGGTCGTTGTTTCATCCTTTTCGTGACGTTTCTGGCTTCCGGC  
TAGAGAAGACGGGAGAATGGAGGGTGGCGAGAGTAATATAGGAATAAGAATAAGGTT  
CTTGCGGAAGGATATTTCTGCCAGGTTCGTAAGATGACACGCGCGTGTACACGCGGGA  
TCGAGGTGTACGAGGGATCGATATTCTCATTCCATCCACGACGAGATCGACGAAAGAA  
AGGAAGGAAGGAAGAAAGGGAGGCACGAATCACGCGTCCGCAAAAATGGGCAACGA  
TGAATTCTTAGCCGGC

>novel\_circ\_000688

GTCTTCAGCCTGCTAGCACCAAAGCGCAACCTACCACGATCAGCAAATCTCATAGACC  
CAGTTCTGGCGTGTTACCTCAGGGTCATACCCCTGGTCCTGGTCCAGGTGGCCAACAA  
AATAGCAGAAGTTTTGCCGCCGCTCTGAGAAACCTGGCTAAACAGGCAGGGCCGGCA  
CCTCAGGAAGAAGAACCTCGCGCGAGTCCCAAAAATCGAGCCCCACCTCCTTTGGTTA  
GAGGTCTTCCCTGCCAAGGAACGATCCACGCACGAGAGAAGACCAGAAGAAATTC  
CCTCGTTGTACACGACTGCGAGACCCGCGGATACCAGCAAACATAGCGTGACTGCCGC  
CGTTCCGAATTGCTGGCCCCGATCCGGTTTTCAACCGTACCGGCCTGAGCATCATCCGG  
CCCACGCTCCACCGGCTTTCGCCCTCGATCCCGCGGCCTACAATCCTTATCACCACGGT  
CTCTACCCACCGCCACACCTTCAACACGCTTATAGATTAGAGGAACAGTTGTATTTGGA  
ACGGTGTGGAATGCTGAGACCGCCATTATTTCTGGGTTACCGTCGTATCCTCTGTACG  
GACTAAGATATAGTCCGGACATGTTACCGCCCGCGTCCCTCGGACTCATGTCTCCCGTA  
ATGCACGAGAGATTGAAACTGGAGGAGGAGCATCGGCTGAGGCAAGCACGGGAACA  
AGCCGCGCTGCGCGAGGAGGAGGAGAGGAGAAGAGCGGCACGAAATTCCGCTCCTG  
CCGCCCCGGTACCCGCGCCTGCACCTGCATCCGCCGATACTGCAG

>novel\_circ\_000689

AAAAAAGTCTATGTTATTCGCGTGATGCACACGCGCTCGTTGGAGGGACCATGAGTCT  
TGAATGGGCCTAAGGCTCCTGGCGAGTTTGTATAAATTGGCTATCAATGTTGCATTTCTGA



TAAAATACGTAGTACCAACGGTGGTCTCTTTTCTGTTTTATTATCAATGATTTACAATTTTC  
ACGCTATTTTTGCGTATTCTAATTTATTAATAAATGCCTAAACTGTCTATGCGTACCATTTA  
TCTGTGTTTTTTTATTGTTAGTCTCGTTCAATGTCATATGATGCATTTGGATGTTATACCTA  
TATTTATATACAAGAATGAGAGAATTAATAAATAAAGAAGATAATGAAATCGTATAGCG  
AATTATCTTCAGAAGAATTAATAACGACCGTTTAAATGCCGATCGAGAGACTTATTGCAA  
GATATCAATATTCGTATAACATAAAATAATCAATAAATCACATATTCTCAATATCTTATTCG  
AGTTGATTTTATAGTCGCTTTAACATTTCAAATTC AACATTTTGCATTAATGTATAAATTAT  
ATAAATTGAACTTGAGGATACAACGAAAACAAAATCTTCATAAAATATAAATATTTGTTT  
AACTTTCCCTGTATTTAAATTATATTAATTGCAATTTATTATATTTAAAGCACATAATTAAG  
AGTGCAGATTTTTCAAACCTCGATATTTTTTAAAAAAATTCAAAGTAATAAAGGATTTTAT  
AATTGTAATACAGTTTCTAAAGATGATTTTATGATTTTGTCTATTATATAATTAACACAA  
GCAAATCTATGAGATGAGCTCAAATAAGTATATAAAATCTTGGTACTTAAAAACAAATA  
AAAATTAATAATTTTTGTCAATTTTACATGCATATATGTTCTATCAATTTTACTGAAATGTG  
CAAATTTTTTTTATTTTCAATGAAAAAAAAAAAAATAAAAAATTTAGAATCATAACCAGCA  
ATTTCCAAAGATTTTAATATTTGATTGAGATGAAACGAATGTTTCGCAATGATCTATTGATT  
ATCGATTATATTATCGCCACGTTTTAACGAAGAGATCGTAACCTCAGTCTCAGTACAAAG  
TAGGCGATCACTCTCAAGGTAAGCAAAAAACCTGTCAATGCAACCGCGTCTGCCAAA  
AGACGGCGTTTTGTCATCGACATTTCTTCGAGGAACTTCGTCGGGCTCTTGAAATGGCA  
GTACGCATCGGAACACTTGAGCTTAGCACGATTATAACCATACACAGAAATCATGGTGC  
CTTCAAACTATATCTAACATAACTTACGTACGAAAGAAAT

>novel\_circ\_000690

AGTGTGATCAAAAGTTTATAAGCACACCTGATGGACCACCGAATGGAACATTTACGCG  
GCCAACGTTGATTAATTACGACGGAGATTCTCGACAATGCGTATACACGTTTTTTTGCTG  
GGCCACGACAACGAGTCGAACTGATTTAATTCGTTTGGCCTTCGGGGAACACCTCC  
AGATGGATCCGCTGTTGGAGAATTACCCGCATGAACTAGGAAAACTTGTTTTTCACT  
TGCGCCACGAATATATGGATGTGTATGCGGAAATACGATCGGAGAATACCAGCAAATT  
GGTAGAAACGCCTTTTCGGTGGTCGTTTCTGTGGCCCGATCCACCTCGTAGGCGTGTTT  
CTCTTTACCAGGGAATTGCTCTAAGTTTTTACACTGATAAAAATATCACGTTACCTACCC  
TGTTACGCGGTACTTATGCCTTTATCAATTCATCTGAATACGAGGTGGGAACACCAGCT  
CCCAGCACACCATGCTCTTTACGGTAGATTTCGGAACATAAACGCAATGGTAATATATTA  
TCTCCTACGTATCCTGGCACATATCCAAAGGGTATTGTATGCAGTTATCAATTTATCGGG  
AATAAATCGCAACGAGTGAGACTCGAGTTCCGGGACTTTGATTTGTTCTTCGGAGGTC  
AACACTGTCCTTTGGATTACGTAAAAGTGTACGACGGTTTAAACGATACGTGCGCCGTT  
ATAGGAACTTACTGCGGTCAACAGCGAAATTTGGTATTGTATTTCGTCGGAATCTAGTTT  
GTACGTGTTGTTTGTACCCTTCAACGTACGGCCAATACGCAAAATCGTGGAATCAAGG  
GCATCTTTGAATTCTCAGAAAGTTTTGTAAATTAGACTTCATAACCGCTAACAAGGGT  
GAGCATATACGAGGATCGGAATGTGATCAGAAGATTTTAAAGTAAAAAGGAATCGTCTG  
GACAAGTTGTTAGCCCAAACCTTCCATATCCGTACATAACCGAAGGTCGTGTGTCGGTAT  
TTCATTTATGGAATGCAAGATTCGCAGCATCTCGAACGTGTTTCGATTAGAGTTTTTCATCA  
TTTAATATATCAAAGAATAAGACGATAGGAGATTCGTCTTGTACCGATGGATATTTAAAG  
TTATACTTAAAAGGGCAAGAAGCGACGGATTCTTACGACAAATTTGATTACGAATTGTG  
CGGCGTGAACAGCAATCCGAACACGTAAGTTAGCGATGGGCCGAGACTTGTGATGGTG  
TTTAGCAGCGGAGAATCTCAAGGGCAAGGTTTTTAAAGCGCGGTACACCTTCGAAACGG

AATATAAAATACCGGGAACCGCTGCACCCGACGGCAGCTGTACGTTTACATACCGCAGT  
TCCTCTCGCAAAAGAGGAGATTTTAATTCTCCTCGGCATCCTAGTAATTATCCAAGCGAT  
ACAAATTGCACATATTTATTCTTAGCGACGCCAAACGAGCAAGTTACCTTAATATTTGAT  
TATTTTAAAGTTCGAACGAAAAATATGAACGTGACGGATGGACATTATGGAATGGAAAT  
TTGTCAAGATGATTGGTTGGAAATATATAACATGTATCGGGACAATACGGAAAAATTGAT  
AGGTAGATACTGCGGTAACACGGCGCCAGGACCCGTCGAGTCGAATCTCGGTGCTCTC  
GGTCTAAGAGTAATTCTCCATTCTGGACTCGGAACTGGTTTATAGCGGTTTTAAAGCCCG  
TTACACGTTTCGAAGTGGCAAAACCTATATTTGGAGATTGCGGATCGAATATAAGTAGCG  
TGAATTATGGTATTATCGCCAGTCCGAATTTTCCAAACAAGTACGATGGACCCGCGAGA  
AATATGGCAAGTAAAACCTTGAATTGGTTTATAAAAGTTCGACCGAATCAGCGAATATT  
GTAAATTTTGAATCGTTTTTCGGTAGAGGGTGACCAATCAGTTCGTGGTTGTCCAGCTG  
CTGTACTGCGCATGTGGTATTCCATATCGTCCACGCCTATCGAGTTATGCGGAGTGAAA  
ACGTCGGATAAATGGACTTATCTTTCCGAGGATAACAACATGCGACTTAGCTTTATATTG  
GCCGACAAAGCGGTTGGACAACCTGGGATTTAAAGCAATATGGACGGAAGTAAGCACA  
AATACCGACTGCCAGAATCAATTTTTCTGCAGCAAAAATAAATACTGCATTGCAGAGTC  
GCTTCGATGTAATGAGGTTTATAATTGTGGCCAGCTGATAATTCGGATGAAGAAAATT

>novel\_circ\_000691

CAGGTAAACGAAAATTTGACGGGGGTCACCAGAACCAGGGGGAATCTAAGCGTCGCT  
TCCAGAGCAACTGGGGAAACCAACCCCTCGCCCAACAACCACTGGGCAATGCGTACG  
GATTGGCGAGTGTGAATGGTGGCAGTGGTGGTGGTGGCGGCGGTGACATAGGATTTCG  
AGGTAGGACCGCCACTCTTGCGGGTGTTCAGCGATGATCACGAATGGTACCAAGAC  
TCTTACCAGTCATGGAGCTAACTTCTGCAAGTCTGTGAGTGAATACGCACGCACGCAC  
TCATTTAAGTACGCACGCAATCACGCATGACGAACGAACGAACGAACGAACGAACGA  
ACGATCGATCGATCGAGAGTTAAACAATAAAAAACAATGAACAACCAATTCGAGTTGA  
CCTTTATGCACAAGGAGGGAGAAAGTGAAGTGAAGTGAAGTGAAGTGAAGTGAAGTGA  
AAGAAAGGAAAAAAACGAAAACAAAAACGGGAAGGAAGAGGATAATTGCAAAA  
GGAACCCGAAAAAAATTTGAAAAGGAAAACGAAGAGCGAAATGAAAAAAGT  
TTTTTTATATATAAAATACAGATACAAACGGAGAAACGAAGAATCGAACGAGGTTACGT  
TAATCTATATAATAATGCTATTTACTTTCAATCATCAATTTGGCAATTTGCAAATGTTTTA  
ACGCCTACTTTCAATCATCAATGAACGAACAAATATGAGAAAGCGCGTGAAGCGTCG  
TACTAGGCCTCACCACCATCGCCCGCTGTTGTCGTCGTGACTATATATATATATATAT  
ATATATATACATATATATACACAATATATATATATACATATATATATATACACATCATATATAT  
AGAAAAAAATATATATATATTTATATATATATATATATATATATATACAGTGATGTGCCACT  
GGGACTAATTACTACATCGGAGTGACCACCCAACAACCCACCCCGTACTATTATATTATA  
TTATAATATACATATATATATATACATACATGTATATACATATGCATATGTACATATACACA  
TATATATCTGTATGTATTATGTATATATGTATGTATGGATATGTATACGTATACGTATATGTAT  
ATATTATATAGTGTGTGTGTGTATATATATATATATATGTATATGTATATGTATACACTAATAA  
TCTAAGTACTACTACATTGTCACATTGTTTACTGCCAAGTGATACAAAGATCAGCGATGT  
TGACATTGGGATTGTGATGGCTTGTTAATTAAGAAAAATCACGGAAGCCTGCGATTT  
TATTATGATGCGATTCTCGACTTTTTGTGTGTATGTGCTAGAACGCGTGTACGGTAAAT  
GGATAGAGAAGATCGTGAAAAAAGCATATGCGTATGTGAAAGATAAAGAAAAAA  
AAGAAACAATAGAAGTAATAGCTAAAAAAAGTGAAGAAGGTAATGATGAATATG  
GTGGTGGGAGATACGAGAAGAATTTAGAGAGGGAAGAACCCGTTATATAATAGGACGA

AGTTGAAGAGAAGAGAAGAGAAAAATGAGAAGAGAGAAATGGGAAGAGAGCATAAG  
GAGAAAGAAG

>novel\_circ\_000692

GCTGGACGTGGCCGTGGAGTAGTGCCGCGTGGCCGAGTCGGTGGCCCCCAAGTCCGT  
GGGCCAGTCAGGGGGGGACGCAACCCCGCAACTTCAGGGGCTCGTGGGGTCCAGCG  
GCTGTCCGCTCGTGGGGGGGTCCGCGCCAAGGGAAGTTTACCAGGTGAGGATGCAGG  
TAAACGAAAATTTGACGGGGGTCAACAGAACCAGGGGGAATCTAAGCGTCGCTTCCA  
GAGCAACTGGGGAAACCAACCCCTCGCCCAACAACCACTGGGCAATGCGTACGGATT  
GGCGAGTGTGAATGGTGGCAGTGGTGGTGGTGGCGGCGGTGACATAGGATTCGGAGG  
TAGGACCGCCACTCTTGGCGGTGTTTCCAGCGATGATCACGAATGGTACCAAGACTCCT  
ACCAGTCATGGAGCTAACTTCTGCAAGTCTGTGAGTGAATACGCACGCACGCACTCAT  
TTAAGTACGCACGCAATCACGCATGACGAACGAACGAACGAACGAACGAACGAACGA  
TCGATCGATCGAGAGTTAAACAATAAAAACAATGAACAACCAATTCGAGTTGACCTTT  
ATGCACAAGGAGGGAGAAGTGAAGTGAAAAAAAAAAAAAAAAAGCGAACTGGAAAGA  
AAGGAAAAAAAAAACGAAAACAAAAACGGGAAGGAAGAGGATAATTGCAAAAGGAAC  
CCGAAAAAAAAAAAAATTGAAAAGGAAAACGAAGAGCGAAATGGAAAAAGTTTTTTT  
ATATATAAATACAGATACAAACGGAGAAACGAAGAATCGAACGAGGTTACGTTAATCT  
ATATAATAATGCTATTTACTTTCAATCATCAATTTGGCAATTTGCAAATGTTTTTAACGCC  
TACTTTCAATCATCAATGAACGAACAAATATGAGAAAGCGCGTGAAGCGTCGTA  
GGCCTCACCACCATCGCCCGCTGTTGTGTCGTCGTGACTATATATATATATATATATAT  
ATACATATATATACACAATATATATATATACATATATATATATACACATCATATATATAGAA  
AAAAATATATATATATTTATATATATATATATATATATATATACAGTGATGTGCCACTGGGA  
CTAATTACTACATCGGAGTGACCACCCAACAACCCACCCCGTACTATTATATTATATTATA  
ATATACATATATATATATATACATACATGTATATACATATGCATATGTACATATACACATATAT  
ATCTGTATGTATTATGTATATATGTATGTATGGATATGTATACGTATACGTATATGTATATATT  
ATATAGTGTGTGTGTGTATATATATATATATATGTATATGTATATGTATACACTAATAATCTAA  
GTACTACTACATTGTCACATTGTTTACTGCCAAGTGATACAAAGATCAGCGATGTTGAC  
ATTGGGATTGTGATGGCTTGTATTAATTAAGAAAAATCACGGAAGCCTGCGATTTTATTA  
TGATGCGATTCTCGACTTTTTGTGTGTATGTGCTAGAACGCGTGTACGGTAAAATGGAT  
AGAGAAGATCGTGAAAAAGCATATGCGTATGTGAAAGATAAAGAAAAAAAAAAAAAGA  
ACAATAGAAGTAATAGCTAAAAAAAAAAAAAGTGAAGAAGGTAATGATGAATATGGTGG  
TGGGAGATACGAGAAGAATTTAGAGAGGGAAGAACCCGTTATATAATAGGACGAAGTT  
GAAGAGAAGAGAAGAGAAAAATGAGAAGAGAGAAATGGGAAGAGAGCATAAGGAG  
AAAGAAG

>novel\_circ\_000693

ATTATGATTACGACTATTACGGTTATGGGGATTATCGAGGTGGCTACAGTGATCCATATTA  
CGATGACTATTATCGATACGAAGATTACTATTTTCGATTACGCGCCGCCTCCGCCACCTGC  
CAGAGGGAGAGGCAGGCAGCCTCAACCGCTGACAGTGCAGTATGTTGTGTCGCTTAA  
AGTTCCTTCGCCATCCAATAACAATAAGCTTTCCGCTTTACTGCATTGGATAATTCTGCT  
AATACTACTGCTGTCTGTAAAAAAATGTGGCTGGACGTGGCCGTGGAGTAGTGCCGCG  
TGGCCGAGTCGGTGGCCCCCAAGTCCGTGGGCCAGTCAGGGGGGGACGCAACCCCGC  
AACTTCAGGGGCTCGTGGGGTCCAGCGGCTGTCCGCTCGTGGGGGGGTCCGCGCCAA

GGGAAGTTTACCAGGTGAGGATGCAGGTAAACGAAAATTTGACGGGGGTCACCAGAA  
CCAGGGGGAATCTAAGCGTCGCTTCCAGAGCAACTGGGGAAACCAACCCCTCGCCCA  
ACAACCACTGGGCAATGCGTACGGATTGGCGAGTGTGAATGGTGGCAGTGGTGGTGGT  
GGCGGCGGTGACATAGGATTCGGAGGTAGGACCGCCACTCTTGGCGGTGTTTCCAGCG  
ATGATCACGAATGGTACCAAGACTCCTACCAGTCATGGAGCTAACTTCTGCAAGTCTGT  
GAGTGAATACGCACGCACGCACTCATTTAAGTACGCACGCAATCACGCATGACGAACG  
AACGAACGAACGAACGAACGAACGATCGATCGATCGAGAGTTAAACAATAAAAAACAA  
TGAACAACCAATTTTCGAGTTGACCTTTATGCACAAGGAGGGAGAAGTGAAGTAAAA  
AAAAAAAAAAAAAGCGAACTGGAAAGAAAGGAAAAAAAAAACGAAACAAAAACGGGA  
AGGAAGAGGATAATTGCAAAAGGAACCCGAAAAAAAAAAAAATTGAAAAGGAAAACG  
AAGAGCGAAATGGAAAAAAGTTTTTTTATATATAAAATACAGATACAAACGGAGAAAC  
GAAGAATCGAACGAGGTTACGTTAATCTATATAATAATGCTATTTACTTTCAATCATCAAT  
TTGGCAATTTGCAAATGTTTTTAACGCCTACTTTCAATCATCAAATGAACGAACAAATAT  
GAGAAAGCGCGTGAAGCGTCGTACTAGGCCTCACCACCATCGCCCGCTGTTGTCGTCG  
TGACTATATATATATATATATATATATATATATACATATATACACAATATATATATACATAT  
ATATATATACACATCATATATATATAGAAAAAAATATATATATATTTATATATATATATATA  
TATATATACAGTGATGTGCCACTGGGACTAATTACTACATCGGAGTGACCACCCAACAA  
CCCACCCCGTACTATTATATTATATTATAATATACATATATATATATATACATACATGTATATA  
CATATGCATATGTACATATACACATATATATCTGTATGTATTATGTATATATGTATGTATGGAT  
ATGTATACGTATACGTATATGTATATATTATATAGTGTGTGTGTGTATATATATATATATATGT  
ATATGTATATGTATACACTAATAATCTAAGTACTACTACATTGTACATTGTTTACTGCCA  
AGTGATACAAAGATCAGCGATGTTGACATTGGGATTGTGATGGCTTGTATTAATTAAGA  
AAAATCACGGAAGCCTGCGATTTTATTATGATGCGATTCTCGACTTTTTGTGTGTATGTG  
CTAGAACGCGTGTACGGTAAAATGGATAGAGAAGATCGTGAAAAAAGCATATGCGTAT  
GTGAAAGATAAAGAAAAAAAAAAAAAGAAACAATAGAAGTAATAGCTAAAAAAAAAAAA  
GTGAAGAAGGTAATGATGAATATGGTGGTGGGAGATACGAGAAGAATTTAGAGAGGGA  
AGAACCCGTTATATAATAGGACGAAGTTGAAGAGAAGAGAAGAGAAAAATGAGAAGA  
GAGAAATGGGAAGAGAGCATAAGGAGAAAGAAG

>novel\_circ\_000694

CTGGTCTGACTGAGGTGATTATCTACAGTTCTCCGGATGACAAGAAGAAAAATAGAGG  
TTTTTGCTTCTTAGAATACGAATCTCACAAAGCTGCTTCCTTAGCCAAACGAAGATTAA  
GTACCGGTGCGATCAAAGTATGGGGCTGTGATATCATAGTTGATTGGGCTGATCCTCAG  
GAGGAGCCCGACGAACAACTATGTCTAAAGTGCGTGTATTGTATGTGAAAAATTTGA  
CTCAAGATTGTTCTGAAGAGAAATTGAAAGAAAGTTTTGAACAATATGGTAATATTGAA  
AGAGTGAAGAAGATCAAGGATTATGCTTTTGTCCATTTTGAAGAAAGAGACAATGCTG  
TCAAGGCGATGAATGAATTAACGGAAGAGATTGGTGGTTCTCACATTGAAGTATC  
TCTCGCGAAACCTCCATCTGATAAAAAGAAAAAGGAAGAGATGCTTCGTGCTAGAGA  
GCGAAGAATGATGCAAATGTTTCAGGGCAGAAGCGGGGGTTCTCCATCGCATCCAAGT  
ATGATGGGAGGACCAATGCCAGTTCGAGGACCAGGTCAAGGTCCTCGAGGTACCGGC  
GCAGGTATGCGAGGACAGATGGGAAGAGGCGATTATGCTCTCATGGAAATAGATTATGA  
TTACGACTATTACGGTTATGGGGATTATCGAGGTGGCTACAGTGATCCATATTACGATGA  
CTATTATCGATACGAAGATTACTATTTTCGATTACGCGCCGCCTCCGCCACCTGCCAGAGG  
GAGAGGCAGGCAGCCTCAACCGCTGACAGTGCAGTATGTTGTGTGCTTAAAGTTTCT

TCGCCATCCCAATACAATAAGCTTTCCGCTTTACTGCATTGGATAATTCTGCTAATACTAC  
TGCTGTCTGTAAAAAATGTGGCTGGACGTGGCCGTGGAGTAGTGCCGCGTGGCCGA  
GTCGGTGGCCCCCAAGTCCGTGGGCCAGTCAGGGGGGACGCAACCCCGCAACTTCA  
GGGGCTCGTGGGGTCCAGCGGCTGTCCGCTCGTGGGGGGGTCCGCGCCAAGGGAAGT  
TTACCAGGTGAGGATGCAGGTAAACGAAAATTTGACGGGGGTCAACCAGAACCAGGGG  
GAATCTAAGCGTCGTTCCAGAGCAACTGGGGAAACCAACCCCTCGCCCAACAACCA  
CTGGGCAATGCGTACGGATTGGCGAGTGTGAATGGTGGCAGTGGTGGTGGTGGCGGC  
GGTGACATAGGATTCGGAGGTAGGACCGCCACTCTTGCGGGTGTTCAGCGATGATC  
ACGAATGGTACCAAGACTCCTACCAGTCATGGAGCTAACTTCTGCAAGTCT

>novel\_circ\_000695

CTGGTCTGACTGAGGTGATTATCTACAGTTCTCCGGATGACAAGAAGAAAAATAGAGG  
TTTTTGCTTCTTAGAATACGAATCTCACAAAGCTGCTTCCTTAGCCAAACGAAGATTAA  
GTACCGGTTCGCATCAAAGTATGGGGCTGTGATATCATAGTTGATTGGGCTGATCCTCAG  
GAGGAGCCCGACGAACAACTATGTCTAAAGTGCGTGTATTGTATGTGAAAAATTTGA  
CTCAAGATTGTTCTGAAGAGAAATTGAAAGAAAGTTTTGAACAATATGGTAATATTGAA  
AGAGTGAAGAAGATCAAGGATTATGCTTTTGTCCATTTTGAAGAAAGAGACAATGCTG  
TCAAGGCGATGAATGAATTAAACGGAAAAGAGATTGGTGGTTCTCACATTGAAGTATC  
TCTCGCGAAACCTCCATCTGATAAAAAGAAAAAGGAAGAGATGCTTCGTGCTAGAGA  
GCGAAGAATGATGCAAATGTTTCAGGGCAGAAGCGGGGGTTCTCCATCGCATCCAAGT  
ATGATGGGAGGACCAATGCCAGTTCGAGGACCAGGTCAAGGTCCTCGAGGTACCGGC  
GCAGGTATGCGAGGACAGATGGGAAGAGGCGATTATGCTCTCATGGAAATAGATTATGA  
TTACGACTATTACGGTTATGGGGATTATCGAGGTGGCTACAGTGATCCATATTACGATGA  
CTATTATCGATACGAAGATTACTATTTTCGATTACGCGCCGCCTCCGCCACCTGCCAGAGG  
GAGAGGCAGGCAGCCTCAACCGCTGACAGTGCAGTATGTTGTGTCGCTTAAAGTTTCCT  
TCGCCATCCCAATACAATAAGCTTTCCGCTTTACTGCATTGGATAATTCTGCTAATACTAC  
TGCTGTCTGTAAAAAATGTGGCTGGACGTGGCCGTGGAGTAGTGCCGCGTGGCCGA  
GTCGGTGGCCCCCAAGTCCGTGGGCCAGTCAGGGGGGACGCAACCCCGCAACTTCA  
GGGGCTCGTGGGGTCCAGCGGCTGTCCGCTCGTGGGGGGGTCCGCGCCAAGGGAAGT  
TTACCAGGTGAGGATG

>novel\_circ\_000696

CTGGTCTGACTGAGGTGATTATCTACAGTTCTCCGGATGACAAGAAGAAAAATAGAGG  
TTTTTGCTTCTTAGAATACGAATCTCACAAAGCTGCTTCCTTAGCCAAACGAAGATTAA  
GTACCGGTTCGCATCAAAGTATGGGGCTGTGATATCATAGTTGATTGGGCTGATCCTCAG  
GAGGAGCCCGACGAACAACTATGTCTAAAGTGCGTGTATTGTATGTGAAAAATTTGA  
CTCAAGATTGTTCTGAAGAGAAATTGAAAGAAAGTTTTGAACAATATGGTAATATTGAA  
AGAGTGAAGAAGATCAAGGATTATGCTTTTGTCCATTTTGAAGAAAGAGACAATGCTG  
TCAAGGCGATGAATGAATTAAACGGAAAAGAGATTGGTGGTTCTCACATTGAAGTATC  
TCTCGCGAAACCTCCATCTGATAAAAAGAAAAAGGAAGAGATGCTTCGTGCTAGAGA  
GCGAAGAATGATGCAAATGTTTCAGGGCAGAAGCGGGGGTTCTCCATCGCATCCAAGT  
ATGATGGGAGGACCAATGCCAGTTCGAGGACCAGGTCAAGGTCCTCGAGGTACCGGC  
GCAGGTATGCGAGGACAGATGGGAAGAGGCGATTATGCTCTCATGGAAATAGATTATGA  
TTACGACTATTACGGTTATGGGGATTATCGAGGTGGCTACAGTGATCCATATTACGATGA

CTATTATCGATACGAAGATTACTATTTTCGATTACGCGCCGCCTCCGCCACCTGCCAGAGG  
GAGAGGCAGGCAGCCTCAACCGCTGACAGTGCAGTATGTTGTGTCGCTTAAAGTTTCCT  
TCGCCATCCCAATAACAATAAGCTTTCCGCTTTACTGCAATTGGATAATTCTGCTAATACTAC  
TGCTGTCTGTAAAAAATGTGGCTGGACGTGGCCGTGGAGTAGTGCCGCGTGGCCGA  
GTCGGTGGCCCCCAAGTCCGTGGGCCAGTCAGGGGGGGACGCAACCCCGCAACTTCA  
GGGGCTCGTGGGGTCCAGCGGCTGTCCGCTCGTGGGGGGGTCCGCGCCAAGGGAAGT  
TTACCAG

>novel\_circ\_000697

CTGGTCTGACTGAGGTGATTATCTACAGTTCTCCGGATGACAAGAAGAAAAATAGAGG  
TTTTTGCTTCTTAGAATACGAATCTCACAAAGCTGCTTCCTTAGCCAAACGAAGATTAA  
GTACCGGTTCGCATCAAAGTATGGGGCTGTGATATCATAGTTGATTGGGCTGATCCTCAG  
GAGGAGCCCGACGAACAACTATGTCTAAAGTGCGTGTATTGTATGTGAAAAATTTGA  
CTCAAGATTGTTCTGAAGAGAAATTGAAAGAAAGTTTTGAACAATATGGTAATATTGAA  
AGAGTGAAGAAGATCAAGGATTATGCTTTTGTCCATTTTGAAGAAAGAGACAATGCTG  
TCAAGGCGATGAATGAATTAAACGGAAAAAGAGATTGGTGGTTCTCACATTGAAGTATC  
TCTCGCGAAACCTCCATCTGATAAAAAGAAAAAGGAAGAGATGCTTCGTGCTAGAGA  
GCGAAGAATGATGCAAATGTTTCAGGGCAGAAGCGGGGGTTCTCCATCGCATCCAAGT  
ATGATGGGAGGACCAATGCCAGTTCGAGGACCAGGTCAAGGTCCTCGAGGTACCGGC  
GCAGGTATGCGAGGACAGATGGGAAGAGGCGATTATGCTCTCATGGAAATAGATTATGA  
TTACGACTATTACGGTTATGGGGATTATCGAGGTGGCTACAGTGATCCATATTACGATGA  
CTATTATCGATACGAAGATTACTATTTTCGATTACGCGCCGCCTCCGCCACCTGCCAGAGG  
GAGAGGCAGGCAGCCTCAACCG

>novel\_circ\_000698

CTGGTCTGACTGAGGTGATTATCTACAGTTCTCCGGATGACAAGAAGAAAAATAGAGG  
TTTTTGCTTCTTAGAATACGAATCTCACAAAGCTGCTTCCTTAGCCAAACGAAGATTAA  
GTACCGGTTCGCATCAAAGTATGGGGCTGTGATATCATAGTTGATTGGGCTGATCCTCAG  
GAGGAGCCCGACGAACAACTATGTCTAAAGTGCGTGTATTGTATGTGAAAAATTTGA  
CTCAAGATTGTTCTGAAGAGAAATTGAAAGAAAGTTTTGAACAATATGGTAATATTGAA  
AGAGTGAAGAAGATCAAGGATTATGCTTTTGTCCATTTTGAAGAAAGAGACAATGCTG  
TCAAGGCGATGAATGAATTAAACGGAAAAAGAGATTGGTGGTTCTCACATTGAAGTATC  
TCTCGCGAAACCTCCATCTGATAAAAAGAAAAAGGAAGAGATGCTTCGTGCTAGAGA  
GCGAAGAATGATGCAAATGTTTCAGGGCAGAAGCGGGGGTTCTCCATCGCATCCAAGT  
ATGATGGGAGGACCAATGCCAGTTCGAGGACCAGGTCAAGGTCCTCGAGGTACCGGC  
GCAGGTATGCGAGGACAGATGGGAAGAGGCGATTATG

>novel\_circ\_000699

CTATGGCAGAAGGAAATGGGGAAATAAAAATGGAAGAGAAACAGTCTAAGGAGGAAA  
TGGAATATGTAGAAAGAACAGAAGATTTTCAAAGTTGATTCAATATGGATTAGATGAA  
AAAGTAGCTGCAAATTAGATGAAATTTATAAACAGGAAAATTAGCTCATGTGGATTT  
GGATGAAAGAGCATTAGATGCTTTAAAAGAATTTCTGTTGATGGTGCATTAAATGTAC  
TCACACAATTTCTTGAATCTAATTTAGAACACGTATCAAATAAATCTGCATATCTTTGTG  
GTGTAATGAAAACCTATAGACAGAAAAGTCGAGCTGGACAAGGTACTGGTACCAGTAC

TACTCCAAAAGCACCAGATGAAGACAAAATAAAGATGATTCTTGAACGAACTGGTTAT  
CCTTTGGATGTAACAACAGGGCAGAGAAAATATGGAGGTCCTCCTCCAAATTGGGAAG  
GTCCTACACCTGGAACCTGGTTGTGAGGTATTTTGTGGAAAAATTCCAAAAGATATGTAT  
GAAGATGAATTAATTCCTTTGTTTGAAAAATGTGGAAAAATTTGGGATTTAAGATTAAT  
GATGGATCCGATGGCAGGATGTAACAGAGGATATGCTTTTATCACTTTTACTAATAGGGA  
AGCAGCACAACAAGCTGTTAGAGAGGTATGTAGATATTATTTGAATTATTTTACTATCA  
TG TAGGTACATGTTTGTGAAGCGTACAAATTCGTATTATCCTAGTTTACAACATCTTGTTA  
TGGATATATCAATTCCCTTCACTTTTGTTTAGAAAACTTTAGAAATGTTACAAAATTGT  
TATTGCTACCAAAATAAGTAAATTTTCGAAATGTTTAAATACATTATTGCACATGTTTTAT  
TTCTTTGCTTTCTTCCTGTTTCTATAACTTGTTTTATTGAATTATTTTTATTATGTTTATGG  
TATTTGTTTCAAAATGAACGTTAATCGACTCATCAAATTGAAGATGGTATAAGAACATCT  
TTTTCTTTTCTTCTTTTTTCTTCTTACATTAAACATTTCGAATACATTTTTTTCATATTCC  
CATGTGGCTTGTTCTATATGTTGTGACTTGCGTTTTCTTTCTTTATTTTTTTTTTTTTTTC  
TTTTTTTTCTTCTCTTTTTTTATTTATTTATTTTTTAAATTTGTAGTTTTAACACAAATGTT  
TTAGCATTATTTTACTAATGGTAAAAAAATAATAAAATTTGACATTCAATGTCTTTAGTTA  
GGAACAATCCACATATTTGTTTCATACATATACATATATGTCCCTGACCACTAATTTATATT  
TAAATATATAATGATGCCCAACACATGCCAAATACTTAACAGCAGCAAAACAGAGAGA  
GAAAATAAATGCACATATGTATTACAGTATAAGCACACGCGCGCGCGCACGCGAATACA  
TGCAGAGATATACATATTTTCTGTACATATATTATACATATACACATACATTTGAACAGGT  
ACGCATTTACATATACACATACGCGCACACACATCATAAGCGCGCGCGCGCATAGGTGT  
ATGCGTACGTACGTACGTACATATGTACGTATGTATGTATATATGTATGTATGTATGT  
ATGATGTATGTATGTATGTATGTATGTATGTACGTATGTATGTATGCATGTATGTATATATA  
TACATACATGTATATAATAATGTCCTATGGATGAGTTTCTTTTCCAGCTCTCCTCTTTGC  
TCAGTGGGCAAAATTGGGAGTGGAGAACATTGACGATGCGAAAAAAGAAGTTCGTG  
TGGTTTTAATTGGTTAGGGGTATATTACTTAATTGGTTGACTTTCGTTGGACAGTGACA  
ATTTTTGTAAACAAAATTTGAAAATTG

>novel\_circ\_000700

CTATGGCAGAAGGAAATGGGGAAATAAAAATGGAAGAGAAACAGTCTAAGGAGGAAA  
TGGAATATGTAGAAAGAACAGAAGATTTTCAAAGTTGATTCAATATGGATTAGATGAA  
AAAGTAGCTGCAAATTAGATGAAATTTATAAAACAGGAAAATTAGCTCATGTGGATTT  
GGATGAAAGAGCATTAGATGCTTTAAAAGAATTTCTGTTGATGGTGCATTAAATGTAC  
TCACACAATTTCTTGAATCTAATTTAGAACACGTATCAAATAAATCTGCATATCTTTGTG  
GTGTAATGAAAACCTATAGACAGAAAAGTCGAGCTGGACAAGGTACTGGTACCAGTAC  
TACTCCAAAAGCACCAGATGAAGACAAAATAAAGATGATTCTTGAACGAACTGGTTAT  
CCTTTGGATGTAACAACAGGGCAGAGAAAATATGGAGGTCCTCCTCCAAATTGGGAAG  
GTCCTACACCTGGAACCTGGTTGTGAGGTATTTTGTGGAAAAATTCCAAAAGATATGTAT  
GAAGATGAATTAATTCCTTTGTTTGAAAAATGTGGAAAAATTTGGGATTTAAGATTAAT  
GATGGATCCGATGGCAGGATGTAACAGAGGATATGCTTTTATCACTTTTACTAATAGGGA  
AGCAGCACAACAAGCTGTTAGAGAG

>novel\_circ\_000701

ACCGGCTTAACACCATTGATGGAAGCAGCTAGTGGAGGATATGTAGAAGTTGGACGAG  
TTTTATTAATAAAGGAGCTGATGTTAATGCTACTCCTGTTCCATCATCTCGCGATACTG

CTCTCACCATTGCTGCTGATAAAGGACACTGCCGTTTTGTAGAATTATTATTGTCAAGA  
GGAACGCAAGTCGAAGTAAAAAATAAGAAGGGAAATAGTCCATTATGGTTAGCGGCAA  
ATGGTGGGCATTTAAATGTTGTTGATTTATTGTACCATGCTGGAGCAGATATCGATTAC  
AAGACAATCGAAAG

>novel\_circ\_000705

ACGCCACGCATCGTGCTACACGCCCCGCTACCGTCACTGCCGCTGCCGCCGCCACCGCG  
CCACCTTCTTTCGGAATAATATATCCAGTGTGTATTTTGTGTGGAGCAGCGACGAGAGA  
CACTCCTCTACAGGAAAATTTAACTTCGTCTGTGCCATTTACGACGCCCTCAACTGTCTG  
AGGTCAGTTTTATTGGACGCACGACACCTGATTACAGCATCCGGAGAGCGCGAGCAAG  
AGGGACAGGCGAGCAGAAGGGGGCTAGAGAGGCCAAAAAGAGGAAAGATGGGAGCGA  
GACAGAGCAGAAGGTCCGTGGATATAACAACGACTCCGAAGAAGGAGGGGTTGCCCCG  
CCGACGGCGGTGTTCGGGGATGCTGCCGCACCTGGCGATGGCAAGCTGGAAAGGATCG  
AGGAGACCGACACCAAGCCTACCACCAATGGTATAGCGCCGCACACGGACGTTCCCCG  
AGGATAAGGACAAAGATAAAGACGACGCCACGGAAAAAGAGAAAGACAAAGAGCAG

>novel\_circ\_000706

ACGCCACGCATCGTGCTACACGCCCCGCTACCGTCACTGCCGCTGCCGCCGCCACCGCG  
CCACCTTCTTTCGGAATAATATATCCAGTGTGTATTTTGTGTGGAGCAGCGACGAGAGA  
CACTCCTCTACAGGAAAATTTAACTTCGTCTGTGCCATTTACGACGCCCTCAACTGTCTG  
AGGTCAGTTTTATTGGACGCACGACACCTGATTACAGCATCCGGAGAGCGCGAGCAAG  
AGGGACAGGCGAGCAGAAGGGGGCTAGAGAGGCCAAAAAGAGGAAAGATGGGAGCGA  
GACAGAGCAGAAGGTCCGTGGATATAACAACGACTCCGAAGAAGGAGGGGTTGCCCCG  
CCGACGGCGGTGTTCGGGGATGCTGCCGCACCTGGCGATGGCAAGCTGGAAAGGATCG  
AGGAGACCGACACCAAGCCTACCACCAATGGTATAGCGCCGCACACGGACGTTCCCCG  
AGGATAAGGACAAAGATAAAGACGACGCCACGGAAAAAGAGAAAGACAAAGAGCAG  
CAAGAAGAGGTAAAGGAAACGAAGCAAGAGTCGGGCGGAGAATCTCCCGCGGAAAC  
GGCAGAGGTCACAACGCCGACGGAAGCGTCCACTCCAAACACTGCCACTTCTCCAGA  
CAATAAGGAAACGAAGAAGAAGGAAAAAG

>novel\_circ\_000707

ACGCCACGCATCGTGCTACACGCCCCGCTACCGTCACTGCCGCTGCCGCCGCCACCGCG  
CCACCTTCTTTCGGAATAATATATCCAGTGTGTATTTTGTGTGGAGCAGCGACGAGAGA  
CACTCCTCTACAGGAAAATTTAACTTCGTCTGTGCCATTTACGACGCCCTCAACTGTCTG  
AGGTCAGTTTTATTGGACGCACGACACCTGATTACAGCATCCGGAGAGCGCGAGCAAG  
AGGGACAGGCGAGCAGAAGGGGGCTAGAGAGGCCAAAAAGAGGAAAGATGGGAGCGA  
GACAGAGCAGAAGGTCCGTGGATATAACAACGACTCCGAAGAAGGAGGGGTTGCCCCG  
CCGACGGCGGTGTTCGGGGATGCTGCCGCACCTGGCGATGGCAAGCTGGAAAGGATCG  
AGGAGACCGACACCAAGCCTACCACCAATGGTATAGCGCCGCACACGGACGTTCCCCG  
AGGATAAGGACAAAGATAAAGACGACGCCACGGAAAAAGAGAAAGACAAAGAGCAG  
CAAGAAGAGGTAAAGGAAACGAAGCAAGAGTCGGGCGGAGAATCTCCCGCGGAAAC  
GGCAGAGGTCACAACGCCGACGGAAGCGTCCACTCCAAACACTGCCACTTCTCCAGA  
CAATAAGGAAACGAAGAAGAAGGAAAAAGATGAAGAAAAAGTGGTCCTTCAGGTCGAT  
CAGCTTCAGCAAGAAGGATAAGAACAAGCCTGCCCGCGAAGAAGCGCCCAAGAATGG



AGACGTCACCAAGGAGGAACCTCTCGCGGAG

>novel\_circ\_000708

GTCAGTTTTATTGGACGCACGACACCTGATTACAGCATCCGGAGAGCGCGAGCAAGAG  
GGACAGGCGAGCAGAAGGGGGCTAGAGAGGGCAAAAAGAGGAAAGATGGGAGCGAGA  
CAGAGCAGAAGGTCCGTGGATATAACAACGACTCCGAAGAAGGAGGGGTTGCCCCGCC  
GACGGCGGTGTCGGGGATGCTGCCGCACCTGGCGATGGCAAGCTGGAAAGGATCGAG  
GAGACCGACACCAAGCCTACCACCAATGGTATAGCGCCGCACACGGACGTTCCCGAG  
GATAAGGACAAAGATAAAGACGACGCCACGGAAAAAGAGAAAGACAAAGAGCAG

>novel\_circ\_000709

GTCAGTTTTATTGGACGCACGACACCTGATTACAGCATCCGGAGAGCGCGAGCAAGAG  
GGACAGGCGAGCAGAAGGGGGCTAGAGAGGGCAAAAAGAGGAAAGATGGGAGCGAGA  
CAGAGCAGAAGGTCCGTGGATATAACAACGACTCCGAAGAAGGAGGGGTTGCCCCGCC  
GACGGCGGTGTCGGGGATGCTGCCGCACCTGGCGATGGCAAGCTGGAAAGGATCGAG  
GAGACCGACACCAAGCCTACCACCAATGGTATAGCGCCGCACACGGACGTTCCCGAG  
GATAAGGACAAAGATAAAGACGACGCCACGGAAAAAGAGAAAGACAAAGAGCAGCA  
AGAAGAGGTAAAGGAAACGAAGCAAGAGTCGGGCGGAGAATCTCCCGCGGAAACGG  
CAGAGGTCACAACGCCGACGGAAGCGTCCACTCCAAACACTGCCACTTCTCCAGACA  
ATAAGGAAACGAAGAAGAAGGAAAAG

>novel\_circ\_000710

CAAGAAGAGGTAAAGGAAACGAAGCAAGAGTCGGGCGGAGAATCTCCCGCGGAAAC  
GGCAGAGGTCACAACGCCGACGGAAGCGTCCACTCCAAACACTGCCACTTCTCCAGA  
CAATAAGGAAACGAAGAAGAAGGAAAAGATGAAGAAAAAGTGGTCCTTCAGGTCGAT  
CAGCTTCAGCAAGAAGGATAAGAACAAGCCTGCCCGCGAAGAAGCGCCCAAGAATGG  
AGACGTCACCAAGGAGGAACCTCTCGCGGAG

>novel\_circ\_000711

GACTACGCCGAGGACGAGGACGAGAACGAAGACGAGACCTCAGCCTCGACCACCT  
GTCGAAAATGATGAGCAGCAGCTCGACGACCACCACAACGACCAGCACCACCACCAC  
CACCACCACGGCCAGGCCTGTGGTTACTCAGAATTACGATTATCGGGACCCGAGAGCG  
TACGAGGGTGATCGTGGTGGGACAGGAGCGCAGTACAACGGGTACCAATCGAGGAAC  
GACTATCCCCCGATGTCGGCGCACAGCGTTCACAAGTGGCAGACTCTGGGCACTCGAG  
AGAGCGTCAAAGAAACCAGGGGCAACATGCAGCAATATAATAAGAACGGGAAGA

>novel\_circ\_000712

AAAAAAAAAAGAGAGAGAAAAGAAAAGAACAAAACGGTATTAACTTTATCGAAGCT  
GTAACGCTGTATGTCTGCAAGCCAAAGGATTGTGAATGCGATTGTGAATACGGTGCACC  
CGCGCACCGCGTTTGATAACACGAAACAATAAAATTATGCGCAAAATTGCAA

>novel\_circ\_000714

ACAAAAACAAAAAAACAAAAAAAGAGAGAGAAAAGAAAAGAACAAAACGGT  
ATTAACTTTATCGAAGCTGTAACGCTGTATGTCTGCAAGCCAAAGGATTGTGAATGCG

ATTGTGAATACGGTGCACCCGCGCACCGCGTTTGATAACACGAAACAATAAAATTATGC  
GCAAAATT

>novel\_circ\_000715

ATTTCGTGGTGTGAGAGAGGAAGCGAGAGGAGAGCGACGCCGGCGCCAGATCCGATC  
GACGTAACACACCCGCTAGGAACGACTTTCCACGTGCACGAGCTTCGCTCACCATGAG  
GCCTTGGACCAACAAGTCCCTCGGCCTTGGTTTTCTCGGCTTACTTCTCATCGTGTCTGG  
GCCTTGTTTTCTATTTCACTTCGCCCGCCATTTTTTCATTACATTCTTCAAAAGGAGATAC  
CGTTAACCACAACATCGAAAGCGTTTGAAGTGTGGAACGACACGAGCGCCCTCCCGC  
CCATGTATTTTAAAATTTCGTTTCTTCAATTGGACTAATCCAGAGGAGCTGCGCATGCCTG  
GCAAGAAGCCCAATTCGTTCGAGCTCGGCCCTTACGTGTTTCG

>novel\_circ\_000716

GAGATACCGATATACATATGGTACGACTCGTATCCGACCCACAGTGGCGAGGGTTACGA  
GGGCCGGGTCTCGAGGGTGAGCCCGAACTCACCTTACGGCGGGGCGAGCCTCAACCT  
GACCGACATCCGCGAGAGCGATCAAGGATGGTACGAGTGCAAGGTCGTTTTCTCAAC  
AGGTCGCCCAACAAGAACGGCACCTGGTTCCATCTGGACGTCCACGTTCCAAGAGTG  
TCGAGGGAGGATAAAAACGATTGGTTGGTTTTTCGTAGCGCCGCCAAAATTCAGCATCA  
CGCCGGAGGAGATGATCTACGTGAACGTGGGCGACGCGATAATATTGAACTGCCAGGC  
GGAGGGCACGCCGACCCGAGATCCTTTGGTACAAGGACGCGAGCCCGGTTCGAGCC  
CTCGTCGACCATAGGGATATTCAACGACGGCACCGAGCTCAGGATCTCGACCATCAAG  
AGCGAGGACATCGGGGATTACACGTGCATCGCTCGTAACGGAGAGGGTCAGATCAGTC  
ACACGGCCCGCGTCATAATCGCTG

>novel\_circ\_000717

GTAATATGGGAGCGGGGGTATGGGGGGCGGAGGAGGGCTGCAAGCCACGGACCTCCG  
GCGAAGGCTCGAGTCCACGAGGCGTTTCGGGAACCACGACTCGTCGTCCCCAGAGTCC  
TCCTCGTTCCCTAAGGCGCGATGCTTCCCGACCGTGCCACGACGCCACCGATGACCAG  
GAAGAAAGAGTCGAGTTGCAAGCGACTCTGGCCTCCGGTCAGCCCACGTGCACAGGT  
TGGCGGGCGTGACAGACGGCAGGACGGGAGGAAGGAGGATGGAGAGGAGGGGGAAG  
GAGGGTGGAGGAGGTGGTGGAGCGGCGGATCAGGCGTAATCGGTTTCGTCGGCGCGCG  
GGGCGAGGATCTTTGGCGCGGATCAGGACGGGAGGAAGGAAGGAAGGAGCGGGAAG  
AGGCATCGGCTTCGATGGCGTCGAGGGGATTACGGTGGATCGCGGACGTGGCAACGA  
GGACCTCCTCCTCGGCATCGTGCTTTTCGTTACGCCAGGTCTGTGCAACCAGGACGC  
GGTGCACATTACGGCGATCCTTGGGGAGAGCGTTGTCTTCAACTGTCACGTAGAGTTC  
CCCGGTGAGCACCCAGTGCCCTACGTTCTCCAATGGGAGAAGAAGGTAGGAGATGCG  
GTACGATATCGGAAGATACCCTCTGCTCTCTATATCC

>novel\_circ\_000718

GTGATGACAGTGGCACGCCGCGGAGGCTAAGGTGGTGGGGGTGTCGCGGCGGGTGAA  
GAAGTGGCGAGGCTCGTGAAAATTGGGGCCGGGAACGGACGATCCGGGCAGCGGTAG  
TGGTGGCGGAACGGCAGGGGTACTATGGGAGCGGGGGTATGGGGGGCGGAGGAGGGC  
TGCAAGCCACGGACCTCCGGCGAAGGCTCGAGTCCACGAGGCGTTCGGGAACCACGA  
CTCGTCGTCCCCAGAGTCCTCCTCGTTCCCTAAGGCGCGATGCTTCCCGACCGTGCCAC

GACGCCACCGATGACCAGGAAGAAAGAGTCGAGTTGCAAGCGACTCTGGCCTCCGGT  
CAGCCCACGTGCACAGGTTGGCGGGCGTGCAGACGGCAGGACGGGAGGAAGGAGGA  
TGGAGAGGAGGGGGAAGGAGGGTGGAGGAGGTGGTGGAGCGGCGGATCAGGCGTAA  
TCGGTTCGTCGGCGCGCGGGGCGAGGATCTTTGGCGCGGATCAGGACGGGAGGAAGG  
AAGGAAGGAGCGGGAAGAGGCATCGGCTTCGATGGCGTCGAGGGGATTACGGTGGA  
TCGCGGACGTGGCAACGAGGACCTCCTCCTCGGCATCGTGCTTTTCGTTACGCCAGG  
TCTGTGCAACCAGGACGCGGTGCACATTACGGCGATCCTTGGGGAGAGCGTTGTCTTC  
AACTGTCACGTAGAGTTCCCCGGTGAGCACCCAGTGCCCTACGTTCTCCAATGGGAGA  
AGAAG

>novel\_circ\_000719

GTACTATGGGAGCGGGGGTATGGGGGGCGGAGGAGGGCTGCAAGCCACGGACCTCCG  
GCGAAGGCTCGAGTCCACGAGGCGTTTCGGAACCACGACTCGTCGTCCCCAGAGTCC  
TCCTCGTTCCCTAAGGCGCGATGCTTCCCGACCGTGCCACGACGCCACCGATGACCAG  
GAAGAAAGAGTCGAGTTGCAAGCGACTCTGGCCTCCGGTCAGCCCACGTGCACAGGT  
TGGCGGGCGTGCAGACGGCAGGACGGGAGGAAGGAGGATGGAGAGGAGGGGGAAG  
GAGGGTGGAGGAGGTGGTGGAGCGGCGGATCAGGCGTAATCGGTTCGTCGGCGCGCG  
GGGCGAGGATCTTTGGCGCGGATCAGGACGGGAGGAAGGAAGGAAGGAGCGGGAAG  
AGGCATCGGCTTCGATGGCGTCGAGGGGATTTACGGTGGATCGCGGACGTGGCAACGA  
GGACCTCCTCCTCGGCATCGTGCTTTTCGTTACGCCAG

>novel\_circ\_000720

GTGATGACAGTGGCACGCCGCGGAGGCTAAGGTGGTGGGGGTGTCGCGGCGGGTGAA  
GAAGTGGCGAGGCTCGTGAAAATTGGGGCCGGGAACGGACGATCCGGGCAGCGGTAG  
TGGTGGCGGAACGGCAGGGGTACTATGGGAGCGGGGGTATGGGGGGCGGAGGAGGGC  
TGCAAGCCACGGACCTCCGGCGAAGGCTCGAGTCCACGAGGCGTTCGGGAACCACGA  
CTCGTCGTCCCCAGAGTCCTCCTCGTTCCCTAAGGCGCGATGCTTCCCGACCGTGCCAC  
GACGCCACCGATGACCAGGAAGAAAGAGTCGAGTTGCAAGCGACTCTGGCCTCCGGT  
CAGCCCACGTGCACAGGTTGGCGGGCGTGCAGACGGCAGGACGGGAGGAAGGAGGA  
TGGAGAGGAGGGGGAAGGAGGGTGGAGGAGGTGGTGGAGCGGCGGATCAGGCGTAA  
TCGGTTCGTCGGCGCGCGGGGCGAGGATCTTTGGCGCGGATCAGGACGGGAGGAAGG  
AAGGAAGGAGCGGGAAGAGGCATCGGCTTCGATGGCGTCGAGGGGATTACGGTGGA  
TCGCGGACGTGGCAACGAGGACCTCCTCCTCGGCATCGTGCTTTTCGTTACGCCAG

>novel\_circ\_000721

TTCCAGCGATGATTCAAGTTCAGACGAGGATGAAAATCATCAACATAATAATGATTCTC  
AGTTCATTATTTGAAGGAAAATTCGGAATTTACATCTTTTGAATCATTATTTCCATCTAT  
GAAAGAAGTATATGGTACTCAACCTGAATATCCTAAAAGAAACGATGTGATATTGTATA  
AAAGATTTGCATTGATCGGGCGTAATGCAACGTATCCCTCAGATTACATGAAAGTACGA  
TAAAATTAACCAACAGGTATCATTTCTGAAGCAAAAATTATTGTAATCCAATTACCG  
ACGGTAAAGAAATCTAATATAAATATATACGAACAATACGTAAAAGAGCTAAG

>novel\_circ\_000726

ATGATACCTGTCGATCTGATGAATTTACTTGTGCAAACAAGCATTGCATTACAGAAAACG

TGGGTATGTGACAGTGATGATGATTGTGGGGATGGCAGCGATGAAAAAGATTGCAAAC  
CAGTTACCTGTAGTCCATCGGAATTCGCCTGTTGAGATAATTATTGTATAACATCTCAAT  
GGAGATGTGATGGTGACTTTGATTGTCCTGATAGACGTGACGAAATTGGATGTAAGTAT  
GCAAATGGAGAACGCCATGTTTCATTGCAATAAAAAAGGAGAGTTTGATTGTGGCGATG  
ATTTCTCGTGCATACACGAAAGCTGGGTATGCGACAGGGAAAAGGATTGCCCCAATGG  
AGCTGATGAATTGCCTAAAGTATGCCACAATTTTACATGTAGACCAGATCAATTTCAATG  
TCAGCATATTCGTAATTGTATATCAGGTCATTTATATTGCAATGGTAAAATAGAATGTGCA  
GATGGTAGCGATGAAAAAAATTGCACAACCAAAACTATTGGTTGCGATCCATCGACAC  
AATTCGAATGTAGCGAAGGATCATGTATTTCTCTTTCCAGTGTATGTAATAAGAATCGCG  
ATTGTATCGGTTGGGAAGACGAAAACGAGAAGCTTTGTGGTGTAATGAATGTTTAAA  
AAACAATGGCGGATGTTTCGCAAATTTGCATCGACTTGCCTATTGGTTTTTCGATGCGATT  
GCAGTGTAGGATATAGATTAATTGATAATCGAACTTGTGATGACATAGATGAATGTTTAG  
AACCAGGTACTTGTCTCAATTCTGTTTGAACGAAAAAGGCAGTTTTAAGTGATGTTGT  
GCCGCGGGTTATCTTAAGGATCCTAGCAATCATACACGTTGTAAGGCAGCAGAAGGTCA  
TGCTAGTCTTCTTTTTACTAGAAGACATGATATAAGAAAAGTAGCATTGGATCGTCTGG  
AGATGACAAGTATAGTGAAAGATACGAAAATGGCAGCAGCCTTGGATTTTCGTTTTTCGT  
ACGGGTATGATTTTCTGGAGCGATAGTAGTGAAAAAAAATCTATAAAGCTCCAATAGA  
TGAAGGAAATGAACGTACAGTTGTAATTGATGATGGTTTGACAACATCAGATGGATTAG  
CTGTTGATTGGATATATAGTCATATCTATTGGACTGATTCTAAAAAAAACACTATAGAATT  
AGCTAATTTGGAAGGCAATATGAGAAAACTTTGATTCAAGATCACATACAAGAACCA  
AGAGCAATAGCTTTGAATCCATTGGAGGGTTGGATGTTTTGGACTGATTGGAGCGACG  
AAGCTCGTATCGAAAAAGCAGGCATGGATGGATCTCATCGAACGGTGATAGTTAATAAT  
GATGTACAGTGGCCTAATGGGTTGACTCTGGACTTAATTGGCAAAAAATATATTGGGT  
AGATGCGAAATTGTATATAATTGGATCGTGTAATTATGATGGTACAGGTATACGAACAAT  
TCTGTATTCTCCGGAAGTATTGAGACATCCCTTTAGTATTACAACATTTGAGGATTATGT  
TTATTGGACTGACTGGGACAAGGAAGCAATATTTAAAGCAAATAAATTCAGTGGTCAAT  
CAGTTGAAGCTGTTATGTCGCTTCGAGCTCTTAAATATCCAATGGTCGTTTCATGTATATC  
ATCCATATAGACAACCAGATGGAATGAATCAATGTCAGGCAGTAAATGGCCATTGTAGT  
CATTTATGCTTACCAGCACCAAGAATTAATTCTAAATCACCTCTTCTTAGTTGTGCTTGT  
CCGGATGGTTTAAATATTATCTGATGGTTTAAATGTGCGTGGAAAAAGTAAGTACAAC  
ATAGTACCTACAACACAAGAAATTAATAAACCATTCAGAGACTTGAACTTTTCAACAT  
TACAACCTACAACATTCATTCGATACATTCAATAGATGGAGACGAGGAAAATGGTTTGA  
CATCTGAATCAACAGATCCTGGTTTAGTTGCTGGCATAAGTGATAGGTGTGACATCCTTA  
GGATTATTACTTCTCGCATTAGTAGCAGTATTATGTTATAGGCACTATCTTCATCGTAATG  
TAACGAGTATGAATTTTGATAATCCTGTGTATAGAAAACTACAGAAGATCAATTTAGTC  
TTGAAAAAATAGATTTCCACTCCCTACTGCTACAGTTGGAGAAGAGGCTCAAGAACC  
TTTAACGAGTCCTGGAACCTAATGATTACGTTTAAAGAATGAATTTGTCAATGAAATGGGC  
TAAGCAGGCTATTGAAATAATTGAATATTGCTATTGAATATATTGACCAAATAACATAAA  
ATGATATATTAAAAAATAAGAAACACATGTCGAGCAAACCTGTTCAATAATATGCCTGT  
ATTTGCCCATCTGCCTGCCAACTCAGCT

>novel\_circ\_000727

ATGATACCTGTCGATCTGATGAATTTACTTGTGCAAACAAGCATTGCATTCAGAAAACG  
TGGGTATGTGACAGTGATGATGATTGTGGGGATGGCAGCGATGAAAAAGATTGCAAAC

CAGTTACCTGTAGTCCATCGGAATTCGCCTGTTTCAGATAATTATTGTATAACATCTCAAT  
GGAGATGTGATGGTGACTTTGATTGTCCTGATAGACGTGACGAAATTGGATGTAAGTAT  
GCAAATGGAGAACGCCATGTTTCATTGCAATAAAAAAGGAGAGTTTGATTGTGGCGATG  
ATTTCTCGTGCATACACGAAAGCTGGGTATGCGACAGGGAAAAGGATTGCCCCAATGG  
AGCTGATGAATTGCCTAAAGTATGCCACAATTTTACATGTAGACCAGATCAATTTCAATG  
TCAGCATATTCGTAATTGTATATCAGGTCATTTATATTGCAATGGTAAAATAGAATGTGCA  
GATGGTAGCGATGAAAAAAATTGCACAACCAAACTATTGGTTGCGATCCATCGACAC  
AATTCGAATGTAGCGAAGGATCATGTATTTCTCTTTCCAGTGTATGTAATAAGAATCGCG  
ATTGTATCGGTTGGGAAGACGAAAACGAGAAGCTTTGTGGTGTAATGAATGTTTAAA  
AAACAATGGCGGATGTTTCGCAAATTTGCATCGACTTGCCTATTGGTTTTTCGATGCGATT  
GCAGTGTAGGATATAGATTAATTGATAATCGAACTTGTGATGACATAGATGAATGTTTAG  
AACCAGGTAATTGTTCTCAATTCTGTTTGAACGAAAAAGGCAGTTTTAAGTGTAGTTGT  
GCCGCGGGTTATCTTAAGGATCCTAGCAATCATACACGTTGTAAGGCAGCAGAAGGTCA  
TGCTAGTCTTCTTTTTACTAGAAGACATGATATAAGAAAAGTAGCATTGGATCGTCTGG  
AGATGACAAGTATAGTGAAAGATACGAAAATGGCAGCAGCCTTGGATTTTCGTTTTTCGT  
ACGGGTATGATTTTCTGGAGCGATAGTAGTGAAAAAAAATCTATAAAGCTCCAATAGA  
TGAAGGAAATGAACGTACAGTTGTAATTGATGATGGTTTGACAACATCAGATGGATTAG  
CTGTTGATTGGATATATAGTCATATCTATTGGACTGATTCTAAAAAAAACACTATAGAATT  
AGCTAATTTCGAAGGCAATATGAGAAAACTTTGATTCAAGATCACATACAAGAACCA  
AGAGCAATAGCTTTGAATCCATTGGAGGGTTGGATGTTTTGGACTGATTGGAGCGACG  
AAGCTCGTATCGAAAAAGCAGGCATGGATGGATCTCATCGAACGGTGATAGTTAATAAT  
GATGTACAGTGGCCTAATGGGTTGACTCTGGACTTAATTGGCAAAAAATATATTGGGT  
AGATGCGAAATTGTATATAATTGGATCGTGTAATTATGATGGTACAGGTATACGAACAAT  
TCTGTATTCTCCGGAAGTATTGAGACATCCCTTTAGTATTACAACATTTGAGGATTATGT  
TTATTGGACTGACTGGGACAAGGAAGCAATATTTAAAGCAAATAAATTCACTGGTCAAT  
CAGTTGAAGCTGTTATGTCGCTTCGAGCTCTTAAATATCCAATGGTCGTTTCATGTATATC  
ATCCATATAGACAACCAGATGGAATGAATCAATGTCAGGCAGTAAATGGCCATTGTAGT  
CATTTATGCTTACCAGCACCAAGAATTAATTCTAAATCACCTCTTCTTAGTTGTGCTTGT  
CCGGATGGTTTAAAATTATTATCTGATGGTTTAATGTGCGTGGAAGTAAGTACAAC  
ATAGTACCTACAACACAAGAAATTAATAAACCATTCAAGAGACTTGAACTTTTCAACAT  
TACAACATACTATTCAATTCGATACATTCAATAGATGGAGACGAGGAAAATGGTTTGA  
CATCTGAATCAACAGATCCTGGTTTAGTTGCTGGCATAGTGATAGGTGTGACATCCTTA  
GGATTATTACTTCTCGCATTAGTAGCAGTATTATGTTATAGGCACTATCTTCATCGTAATG  
TAACGAGTATGAATTTTGATAATCCTGTGTATAGAAAACTACAGAAGATCAATTTAGTC  
TTGAAAAAATAGATTTCCACTCCCTACTGCTACAGTTGGAGAAGAG

>novel\_circ\_000728

ATGATACCTGTCGATCTGATGAATTTACTTGTGCAAACAAGCATTGCATTCAGAAAACG  
TGGGTATGTGACAGTGATGATGATTGTGGGGATGGCAGCGATGAAAAAGATTGCAAAC  
CAGTTACCTGTAGTCCATCGGAATTCGCCTGTTTCAGATAATTATTGTATAACATCTCAAT  
GGAGATGTGATGGTGACTTTGATTGTCCTGATAGACGTGACGAAATTGGATGTAAGTAT  
GCAAATGGAGAACGCCATGTTTCATTGCAATAAAAAAGGAGAGTTTGATTGTGGCGATG  
ATTTCTCGTGCATACACGAAAGCTGGGTATGCGACAGGGAAAAGGATTGCCCCAATGG  
AGCTGATGAATTGCCTAAAGTATGCCACAATTTTACATGTAGACCAGATCAATTTCAATG

TCAGCATATTCGTAATTGTATATCAG

>novel\_circ\_000729

ATGAATCTTGTTCTTTAAGACAATTTCAATGTGCAAATGGTAAATGTATACCACTTCCGT  
GGATTTGTGATGGAACAGATGATTGCGGAGATAAATCCGATGAACTATCAAGAAATGT  
GAAGTACAACATCTGTAGTCGGCAGCGTGAGTGCATCGACATCGCATCGTTGTGAATC  
CGATCTTCGGGATAATTATATAGATTATCATATTCAGTTGCAATTTTATAGAAAAGCATT  
TCAATTCTGTTTCGCGTTATATTTTACAACAATCTGATCGTATATTTATCACATTAACTCGA  
AGCTTTCAAAGATTAAAAAAGTTTGGTTAAATTTTTCTTTCATCTTTTTTGTCTTTAT  
CTTACGTTTCATCCATTTAGTGATTTCAATGAAATAGAAAAAAGAAAAAGTATCGAAAA  
CAATCTTGAAAAGAGAAATTATTGACAGGAGATTTGATTATTGGAAAACATTTTATGG  
ACAATTGTTTGTCTTCAAATCTGAAAAGTGATCTCTTAAAATAAATTGGTGATTAAAGTCA  
AGAGAGAAAAGAGGAAAGAAGAAAGAATAAGAATATTGTGAATTGGAAAGAAAAATT  
TCTACGAAACAGATAGATTTTTTTCATCGAATAAGGATTTCAATCGTTTCAAGGATACGAA  
GTTTCGAAAGATGCTCTCAATGGTTTCGATATTTTCGGTCCTCAAAAATGTTCCGATACGG  
AGTTCAAATGTATGAACGGCAAATGCATACCTGGAACCTGGCATTGCGATGGCGACGA  
TGATTGTGCGAGATGGTTTCGGATGAAGATCCAGCAGTTTGCAGATCGGAATCATGCAGT  
GAAACGGAGTTCGAGTGCAGCCTAGGAGACTGCATACCGAAAAATTGGCTCTGTGATT  
TTCATCGTGACTGCACAGATGGGATGGACGAGAAAAATTGTGGCAGGATGAAGAATTG  
CACGGCGGATCAGTTCACGTGTCACCTCTGGGAATGGCGAGTGTGTGGCACTCGCATGG  
ATGTGCGACGGCCATCGAGACTGTTTCGGACGATTCAGACGAGGCTGAGTGTA

>novel\_circ\_000730

GTAATTC AACCAACTCCAGAACTTTCTCCATGCACAAGCGAAGCAGGTCTTTATGCAA  
AAAACGTGATGATCACAGGGATTAACGGTAAAAGAGCACCATTGGCTTCTATGGGCAG  
TGTTGATCCTCCAGAAGCAGATTCGAGTTTCAATTATTCAAGGTCTCTTGGTTCCGACT  
CGGTCTTCCTAAGAAACGATGAACAAGAAGAGTGTCTCGACACAGAGGATGAAGTGT  
CTGGATTTTCGACCGATTCTGAAACAGCCGGGCCAAGTTGTCGACGGTTTCTTCGAGT  
ACCCTCGAAAAAGAAGAAAACAATTGAAAAATGGGATGGTTGTGCTGGATGTGTTCT  
AGACGGCGATCTGGAGGCCAACTTTGTCAAGCTTGTGCATAGTATTAGTGCAGCTGTTG  
AAACCTCTAG

>novel\_circ\_000731

ATATGGGGAGTGTCTAGGCAGTAACGTAAACATAAGCAACGTAAACAAAGAGGATGGA  
TTCAACAACGTTCCGACCAGAAGCGACGTCAACCCTCAGTGAGCGGGAGCAACTTAA  
AATTGAATTTTACAAAACCTTATGATGTTATGACCGGAGTCAGAATCGCAGCGACTCTCG  
GTGGTTTTTTCGGTCTTATGATCCTTCTGCTTGTTTATAAAAGCAGATGTAAATCGAGCA  
AACAATTGGAGGATCCAAGATTGACTGCAGCTGCAGCCGCAGCTGTAGCTGAAGCAG  
AAGCTGAAGAAAGAGCGCTTGCAGCTGCTCTCGAAGCCATCGCTAGATTACCACCTAG  
ACCAGATCGGGGTCCTAGAAGATCTCTCTGTGTCGAGGTAACCTCAATCTCATTTGCCAA  
GAATTGGTCCGCGTTTTGCATCGATTGGAGGTGGCTATGAAGCTCTATTAACACCACCA  
ACAAAGCAATCGAATTTGATACTTCCTGAAGAACAAGAAGATGCAGTTCGGTAACAT  
GTAGCAGCACTGGGAGTAGTTATCTCGAGAGAAGGGGATCTGTGATGCCAGTACCATG  
TTTGCCGCTTCATTCTACGTTTTCAACTAAATACACTATCCATGATGAACCCTGGGATCT

TTATTATCCCATTGATATTCAAGTAATTCAACCAACTCCAGAACTTTCTCCATGCACAAG  
CGAAGCAGGTCTTTATGCAAAAAACGTGATGATCACAGGGATTAACGGTAAAAGAGCA  
CCATTGGCTTCTATGGGCAGTGTTGATCCTCCAGAAGCAGATTTCGAGTTTCAATTATTC  
AAGGTCTCTTGGTTCGACTCGGTCTTCCTAAGAAACGATGAACAAGAAGAGTGTCTC  
GACACAGAGGATGAAGTGTCTGGATTTTCGACCGATTCTGAAACAGCCGGGCCAAGTT  
GTCGACGGTTTCTTCGAGTACCCTCGAAAAAGAAGAAAACAATTGAAAAATGGGATG  
GTTGTGCTGGATGTGTTCTAGACGGCGATCTGGAGGCCAAACTTTGTCAAGCTTGTCAT  
AGTATTAGTGCAGCTGTTGAAACCTCTAG

>novel\_circ\_000732

ATATGGGGAGTGTCGTAGGCAGTAACGTAAACATAAGCAACGTAAACAAAGAGGATGGA  
TTCAACAACGTTCCGACCAGAAGCGACGTCAACCCTCAGTGAGCGGGAGCAACTTAA  
AATTGAATTTTACAAAACCTTATGATGTTATGACCGGAGTCAGAATCGCAGCGACTCTCG  
GTGGTTTTTTTCGGTCTTATGATCCTTCTGCTTGTTTATAAAAGCAGATGTAAATCGAGCA  
AACAATTGGAGGATCCAAGATTGACTGCAGCTGCAGCCGCAGCTGTAGCTGAAGCAG  
AAGCTGAAGAAAGAGCGCTTGCAGCTGCTCTCGAAGCCATCGCTAGATTACCACCTAG  
ACCAGATCGGGGTCCTAGAAGATCTCTCTGTGTGCGAGGTAACCTCAATCTCATTTGCCAA  
GAATTGGTCCGCGTTTTGCATCGATTGGAGGTGGCTATGAAGCTCTATTAACACCACCA  
ACAAAGCAATCGAATTTGATACTTCCTGAAGAACAAAGAAGATGCAGTTCGGTAACAT  
GTAGCAGCACTGGGAGTAGTTATCTCGAGAGAAGGGGATCTGTGATGCCAGTACCATG  
TTTGCCGCTTCATTCTACGTTTTCAACTAAATACACTATCCATGATGAACCCTGGGATCT  
TTATTATCCCATTGATATTCAA

>novel\_circ\_000733

ATATGGGGAGTGTCGTAGGCAGTAACGTAAACATAAGCAACGTAAACAAAGAGGATGGA  
TTCAACAACGTTCCGACCAGAAGCGACGTCAACCCTCAGTGAGCGGGAGCAACTTAA  
AATTGAATTTTACAAAACCTTATGATGTTATGACCGGAGTCAGAATCGCAGCGACTCTCG  
GTGGTTTTTTTCGGTCTTATGATCCTTCTGCTTGTTTATAAAAGCAGATGTAAATCGAGCA  
AACAATTGGAGGATCCAAGATTGACTGCAGCTGCAGCCGCAGCTGTAGCTGAAGCAG  
AAGCTGAAGAAAGAGCGCTTGCAGCTGCTCTCGAAGCCATCGCTAGATTACCACCTAG  
ACCAGATCGGGGTCCTAGAAGATCTCTCTGTGTGCGAG

>novel\_circ\_000736

TGTCAGTGCGGTCCCACTCCCGGGCGCGATCCCACTACTGCCCCGCCACGGAGACTTTT  
GGCTGCTGGGTGTCCCCCTCTGGCCCCGGTTCGCCTCTCCCTAGCCAACCTGGCCATCCA  
GGATTCTCCAGGATGCCCATATTGATGGCGAGCTTAGCGCGGACACCCAGTCGACGT  
GAGTCCCGCA

>novel\_circ\_000738

CTCACGTCGACTGGGTGTCCGCGCTAAGCTCGCCATCAATATGGGCATCCTGGAGGAAT  
CCTGGATGGCCAGGTTGGCTAGGGAGAGGCGAACCAGGGCCAGAGGGGGACACCCAG  
CAGCCAAAAGTCTCCGTGGCGGGCAGTAGTGGGATCGCGCCCGGGA

>novel\_circ\_000739

CGGGGGTTCCTGTTGGTGCGGGACTCACGTGCGACTGGGTGTCCGCGCTAAGCTCGCCA  
TCAATATGGGCATCCTGGAGGAATCCTGGATGGCCAGGTTGGCTAGGGAGAGGCGAAC  
CGGGCCAGAGGGGGACACCCAGCAGCCAAAAGTCTCCGTGGCGGGCAGTA

>novel\_circ\_000740

ATCAAACAAAGAAACAAAATGGGATGAAATGAATATAATTGCAACATTGCATCCACCA  
GGAAAAGATTATGGCCATATCAAGATTGATGAACCAAAAACTCCATACAGCTATGAAGG  
CTTGCCCGGTGAATTTGAATTTGATGAATTAGATTCTGCTACAATTGCTGCTAAATTAGC  
AGAGAGCAGTAAACCAAAAATATTTGAAGAATCAAGTGAAGATGAAGAAGAACTGA  
AACTCTTGAAGAAAGAG

>novel\_circ\_000741

ATCAATCGGGTTGGCAAGAAAGAATAGAACGTCTCTCGATGAATAGTCAGGATAATAAT  
ACCTCGGACTTAGGACACCCTGTACAAATTGTGCTTGCTCATCCAGATCACAGTTTTGA  
ATTAAACGAAGAAGCTTTATCAAAAATTCTCCTTGAAGATGATATTAAAGATAGGAGTG  
TAGTTGTTGTGTGCGTAGCGGGTGCTTTCAGAAAAGGCAAAAGCTTCCTGCTTGACTT  
TTTCTTGCGATATATGAATAGTAAGTATAATAACAACAATCAAACGGATTCTTGTTGGG  
TAAAGAAGATGAACCATTACGTGGATTTTCGTGGAAAGGAGGATCTGAAAGAGACAC  
GACAGGCATATTAATGTGGTCAAAAGTTTTTCGTGGTACTTTACCAGATGGTGAAAATG  
TTGCTGTGATTTTAATGGATACACAAGGTGCTTTCGATAGTCAATCCACTGTGAAGGAT  
TGTGCGACTGTGTTTGCTCTAAGTACAATGTTGTCATCTTTACAAATTTATAATCTATCAC  
AAAATATCCAAGAGGATGATCTTCAGCACTTGCAACTTTTTACGGAATATGGTAGGCTG  
GCGTTACAAAACCTCTGGACGCAAACCATTCAAAAGTTACAGTTCCTTAGTAAGAGATT  
GGAGTTATCCTTACGAAGCGAAATATGGTGCAGAAGGTGGAAAAGAGATATTGAATAG  
AAGATTAGAAATTTCTGATAACAACATCCAGAATTGCAAAGTCTAAGAAAGCACATT  
AAATCATGTTTCTCGGATATATCTTGTTTTCTCATGCCACATCCAGGTTTAAATATTGCCA  
CTAATCCTCATTTTCGATGGTAGATTAGCAGAAATTCAACCAGAATTTAAGGAACAACCTC  
AAGGTATTAATACCGATGTTGTTAGCTCCAGAAAATTTAGTTACAAAGAAAATTGATGG  
ACAAATTGTAAAAGCGAGGGATTTATTGGAATATTTCAAAGCTATATGAAAATTTACA  
AAGGAAACGAGCTTCCTGAACCAAAAAGTATGTTAGTGGCAACAGCAGAAGCAAATA  
ATTTAGCTGCAGTTACAGAAGCTAGAGAATTTTATATGCGATTAATGGAAGATATTTGTG  
GAACAAAAAAACCATATTTAACAACACAACGTTTAGAGGATGAACATGCACGTTGTAG  
GGATAAAGCTATATACAAATTTCAGAATAAAAGAAAAATGGGAGGAGAATCATTTAGTC  
AGACTTACACAAAAAAATTATGCCAGGATATGGATAAAGCTTTTGTTCACTTTAAAGCA  
CAAAATGAAAGTAAAAATGTTTTTAAATCGACGCGAACTGCAGGAGTATATTGCGCAAT  
TGTTGCCATTATGTACTTCTTATCCTCTATATTTGGTTTTACTGGATTATATCTATTAGCAA  
ATATTTGTAACCTTCATCATGTGCATCTGTATATTAACCTTAATGTTATTGGCATAACATTAGA  
TACAGCGGTAATTATGACACAATTGGAATAGCAATAGATGAAGTGGCTAATGTTTTATGG  
AATAATTTAATTAAGCCAGTCTATCAACAAGTTGTGGAGAAGTCAGTGTCCGTAGCAGT  
GGCTCAAGCTGCTGAAATGGCTACAAATACAACAATGAATGCCACTGTCACTGCCAAT  
GGCAAGCCTAAACTAACATGATGTTCAATCCCTTTGTGTCCCAATTTCTTAAGTGCATTA  
GAAATATACACCAATGTATTAACCA

>novel\_circ\_000742



GCGGTATATGCTGGTCTTCCATTAGCAACGGTCGTTGCAAGGAATTATTGTCACAAGGA  
GTGACAAAGGAAGATTGTTGCGCGTCGAACGCTGCAGCAGCGACCGCGTACTCGGAC  
GAAGATCTCGATAGCGGAAGTCTCTTTTTTTGGAGGGTGCTTGGTGGAGGTGTGCAGT  
GTCGTCCTTGACAGAGAAAGCTGCACGGAAGTAAGGTGTGAGGAGGGAAAGAAGTGC  
GTGGTGCGTAGGGGAAGACCGAGGTGCGTGTGCAGCCCTGAGTGCAAGGCACCAAGA  
GGTGGTGGTCCAGTCTGCGGGACGGACGGCAAAAGCTACAAAAATTTGTGCAGACTG  
AAGAAACGCGCTTGCAAGAAAGGAAGCCACGAAGTAGCGGTTGCCTATAACGGCCAC  
TGCCAAAGTTTCGTGCGCACGGGTCCGGTTCGGGCCAAGGCCGGAGCTGCCTGCTGGAC  
CAGAACCTGAGCCCGCACTGCGTGAGGTGCGCCCGCAGGTGCCCCAGCCGCCCCCG  
CAACAACGAGCCGCCGCACGCCCCGTTTTCGGGGGCCGACGGAAACACATACAAGAGT  
GCCTGCCACCTGCGACTTGCCGCCTGCCGCGCAGGTCGCGCCATTCCCGTCGCCTATA  
AGGGCCACTGCAAAC

>novel\_circ\_000743

AGTTGTCAATGATGGGTCTGCAGGCCACGGCAGGGAAACGTAAACTGGAGGGAGGT  
GTGGGCTGCATGGAGTTCGACATGGATATGGGCGAAAGCCCATCGAAGTTAGGCCGAG  
TGGAGGGTAGCTGGTGGGCGATGGAGGATAGTTACACGCCTCCGCTTAGCCAAACACC  
GGCTTCTTATTACGATATGGAAGTGAGTCCGCCTTGCCTGCAGACAAATCCTTGTAAC  
CAACATCGACGAGTCCTCAACAACAACAACAACAGCAACATCAAACGGCACAGC  
AACAAACAGCAACAATCATCGACGCCAACGTCAGCGCCTCCACCGTCTACGGTGGCGC  
ACCTACACCATCATCCGCAGCACTACTATCACCATCAACGCGGACCTACCAGTCCGGTC  
GGTAATAATGGTTACAGTCAACTGTCGAGGCCTCAGCCGCAATGGGGAGCGCCTCATC  
ATTACGAACCTCCAACGATACGGCGAGAAGAAAACGGGAAAAGTTACTTGAGCTTG  
GATCTAGTTATCGAGCAAACGATAGATGCTGCGAGGGTTTCGAGGTCGAGTTGGTGTGCG  
ACGTGGCAGAGCGTGTTATAGACAAAGGCGGCTAGCCGTGTTAAATATTTCAATGTGCA  
AGCTTGCGAGGTATCGCCAATTTCCGGATCCGAGCCTTCATCGATCGGTTCTCATCTGC  
AATACATTGAGGCATCTAGAACGCGAAATGGAGAGGGACAGAAGTCCACCGCCCATG  
GAGCCAGTTATACCAGCGCCTATTGCTCAACTTCAACCTCCTGAGCAGGGCAGGTTAA  
CGCCATTTCCAATGCCACCAACGTCTTCAAACGAGACAGACGTCGATTCTGGTATCGG  
CGATAGCGATGATAGTCGTTTCGATTAAGTGGGGCAGCGTGCTATCTCTTTCGAGTCAGT  
CGCCCTTAGATCCATTGAACAACAACGAGTTACTGGATGTCGATATTGGTCCGGATCTA  
GATTTAGACTTCATGCCCCGATGGAAATTGACACCTCTGTCTGCGGACGATATTCTTAG  
GAGTACAACGGCGCAAGAGCAGCAACACCAGCAACACCATCATCATCAGCAACAGCA  
GCAACAGCATCTGGTATCAACCAGCGGTAGCTGTGCCAATAGCAACGTGGCCAGTGCC  
TGCGTTAATACTGGAAGTAGCAGTAGTACGCACGAATCGTTAATGTGCGTTGGATCATA  
GCCCCCAATTTTGACATCGTTGAGTCATCTCATCGATTTTACCCACTGATGCCGCAGA  
GCAAATAAGTATGCGGCATTTACAAAGAACCACAAATCAAGATGTAGAGACGACGCAA  
TCGCCCCGCTCACGAATTATTTGCAACGCCTGGTTCGGCGATTCTCCAGGAGGTCTTCTT  
TTTCTTATTTATTACCATTCGTGTCAATTACGCACCGATCGATTATCTCGGTTACGTTCTA  
CTTCGTATTACATCGGTAACCAGCATGGGTGGTCTACTCCTTATGGGCGAGGAGGTATG  
AGACGTGATACCTCCTGTGTTCGCAGGTGCAACTGGTGCAGAATTCATGGCCCATTGG  
AAATATTTAAAATTCAAAGGAAATAGAG

>novel\_circ\_000744

AAGGCGGAAGGTTGCAAAAAGAGCTGAGCTACGCTTCGGAAGCATTGGGTGAAGCAG  
CTGCCTCGACGCATCAACTCGTGATTCAGACACCCAAGGATCCTGGAGCGAATATTTTG  
CACCTGCCGCACTCAAGGAACATTTAGCGATCCTGAAGGCGGCGACGCAGGTCACC  
GTACGCTTATTCGATACCACGTGGAAGCTGAAAGACATGTGTTACGCGCTCAACATACC  
CAACTTCGACATGCACTACATCGACCAGATCTTCGATAGTATTATGCCGTGCGCAATCAT  
TACACCCCTCGATTGTTTCTGGGAAGGTAGTAAGCTGCTGGGACCAGAATACCCTGTG  
CACATACCCCGGACGCAGACGCACAAGCCTGTCCAATGGACGAATCTCAATCCATCGG  
GGATGCTCGACGAGATGAAGAACTCCAGTTCATGTTTCCCTTCAAACTTTGGAGGA  
CTACATGAAGAGGGCCGGGATAACGAACGGCTACCAAAGCAAGCCTTGCCTCGACCC  
AACGGACCCGGAGTGTCCGGAACCGCGCCCAACAAAAAATCCCAGCAG

>novel\_circ\_000745

ATCTTCGATAGTATTATGCCGTGCGCAATCATTACACCCCTCGATTGTTTCTGGGAAGGT  
AGTAAGCTGCTGGGACCAGAATACCCTGTGCACATACCCCGGACGCAGACGCACAAG  
CCTGTCCAATGGACGAATCTCAATCCATCGGGGATGCTCGACGAGATGAAGAACTCC  
AGTTCATGTTTCCCTTCAAACTTTGGAGGACTACATGAAGAGGGCCGGGATAACGAA  
CGGCTACCAAAGCAAGCCTTGCCTCGACCCAACGGACCCGGAGTGTCCGGAACCGC  
GCCCAACAAAAAATCCCAGCAG

>novel\_circ\_000746

GCTGTGCTCCTTGACCTTGACCCGTCTGGTGATTTTACGGCCATTAGGCTCTGATTTAAC  
CTCGATCAGCATCGCGGTGAAGATGCAGAGCTCGAAGAGAACTTTACGTTCAAATGAG  
ATGGCCATCCCCAGCGGTGGCATGCTGGACACTGAACTCGAGCTCCAATTCGCTCTTC  
AGTATCCACATTTCTCAAGAGGGACGGCAACAACTGCTGATACAGCTTCAGAGGAG  
AAAACGCTATAAAAATCGCACCATGCTCGGATACAAGACTCTAGCTGAGGGAGTGATC  
AACATGGCTCAGGTTCTCCAGAAGCAGATGGACCTGGAGTTGGAGCTGGTGTCGGAC  
AAGGCTGAGAAATATGGCGGACATTCGGTCGCGCTGGCTCGCGTGAGCGTCGTCGCGC  
TCAGCTCTCAGCCGGTCGACCAGGACAAAAGACTGAACGACCCGAATGAGAGGCTCT  
GTCCCGAATATAGCGACGAGGAGGAAGAGTTCAGCTCAGAAGGTGAGGCGGAAGGCA  
GCGACAGCGAGCCGACTCTTGAGATGCACAGGCGGAAGAGTCGGGGAAAGATTCCGA  
CGAATGCCAGGCAAAGAAATTTAAAGCAAAAATTCATAGCTCTGCTGAAAAGACGGTT  
CAGGGTATCCGAGGATTTAGATCAAGATCAAGAGGAAATTGGGCAGAAGCTTTTCAGAG  
TCGTTAACTGGATTTGTAAAGGCGCAGAGATGGAAATCGAAGAAGCTTTCGATGAAC  
TGGAAGATTTGTCCGACAGTGGTCCAGAATTGGACACCATGTCCGTCAGTAGCACACC  
CAAGCCATCCCTTCGACCTTTCTTCAGTTCTAGTCGATCTCTCCTCGCTCCTCCTCATTC  
CG

>novel\_circ\_000747

AACGAGGAATCGGGGAAAGAAAAGTGGTGTCGAAAATCGAATCTACGCCTCGACTA  
CGTTTCGAAACACGTGTTCTCGTTTTTTACAAGCGCGTGATAAAAGGATTAGAGAGAG  
AGAGAGAAAGGACAACGATAGAGGGACAAACAACCGTTCAAACATTTTCATTGAGATT  
GTTCTTTGTAATTATGAAAAGGCTGTGAATCGAGGTTACCTATGTATCGCGAAGAGAAC  
GAGCAAAACAGAGCCGCGGACTTGGCTCCCCAACAACCGAGTGGTGCAAACACGTTT  
GAGCGTTTGGAACATTCTCAGGATAGCAAAAATGGGGACGATGGTCCCAAGAAGGTG

CAAACAGACGCTTCCTCTTCGACTAATACTCCAAAGCCGCGTGCACGGAATTGTGCAC  
GATGTCTGAATCATCGGCTGGAGATCACCTTAAAATCGCACAAGAGGTACTGCAAGTA  
CCGTA CTGTACCTGCGAGAAGTGTAAGATCACTGCCAATCGGCAGCAAGTGATGCGG  
CAGAATATGAAGCTGAAAAGACACCTGGCACAGGATAAAGTCAAAGTAAGAGTAGCG  
GAAGAGGTTAGTCTTTTCCTTGTTTCATAATGGTTTCTTGCGGAAAGGCTCTCTTGTCG  
TGGCTTGAGTCAGCGAGGTATTTTGATTTTAACGATTCCTAACATGTTGCCGCTGATA  
TAGTTTTCTGTCGTTTTGAAATTTGTTTTTTTTTTTTTTTTCTCTTAATAATTGATCGTA  
AAGCTGTAAAAGCTGATGTAAATAGTAAGTTCATAGGATACCGTGGAATCCGCTCCCAT  
TGGCGTAGAAAATACAATTTCTTCGGTCCCTCAACCACCTAGAAGTCTCGAGGGTAGTT  
ACGATAGTAGCAGTGGCGATTCAACAGTGAGCAGCCACAGTAGCAATGGTATACACAC  
CGGATTCGGTGGTAGTATCATCACTATACCTCCTACAAGAAAATTGCCGCCGTTGCATCC  
TCACACTGCGATGGTCACCCATTTGCCACAGACGTTAACCA

>novel\_circ\_000750

GTATCTCGAACTTTTTAATAGAGCGACTCAACGAGGAAAGCGAGACCTACGGGATGGT  
ACAACGACCCTACCCTCTCCTATCCACTTCTCACCTTACCTTCCTCCTTCTTACTCGCT  
TCCTCGGGCCTTTTCCATTTTTTTTTTTTTTTTCTTCATCGTTAGAACTTTCTCTCCTTTT  
TTCTGCCTTGTTTCACCCACTTGTCGGTGCGGCTCTTTCCTTCTCACGACCAGGTCTTC  
CACCAGATTTTTCTGCATAAACAGCAGGTCATTAACCGCCGCTATAGCGGAAGATCGT  
ATCTACCTTATCTCGTCGAGACTCTACTATTCTCGTCAATGCGGGTACTCGAGCGGGATG  
ATTCTATCCCCGGCTTCCTCCTCCTCGGATAACGCTCTCGAATGTGTTATTAGTTTGT  
GCGCGATATCGTGGCCGACTATGATTGGCGATAATACCGTTTTCCACGGTGGATTTTCCG  
CGAGATTACGATTTACCTCGAAGCGAAAGTAAAAAGGTGAAAACGAATATTGAATATG  
GGTGTGTCGTAAGGAATGTGTTTTCTCGGGGACTCAGTGAAACGATGGAAAAAGAATT  
GTATAATATAATTGTTTGAAGAGTGATTCTAAGAAAGAGAGATTGAAAGGAAAACGAA  
GAATTGGTGTTTAAAAATAAATGTCTCTTTGTTCTCTCCGCTGCAAAATTAAGTTGA  
AAAACAAGTTATAAGCAAGCTTTGATGGATATTTTTTTGCACGCCATTTCGAAGAATCG  
CCTCTCAAGTTTTTTTACCTACTTTGCTCGAGCATCCTGTATAAGAGAAAAGGATTGGCT  
CTTACTAAAAGCTATAAAAAATGAAAAATATGAAAAATATGTTTGAAGATGTTTCAAATT  
CAATTCAACGTATTGCTATCTTTAAATTTTATCAATCTATCAAACCTCGATTTTAGATCCT  
GAATAATAAACGAAATATTAAATGTTTTTTATCGGTTTTTATCATTCTATCGCTCGTTGCG  
AATGCTCACAGCTTCGATGCTTTTAATGACTTGGCAATTTGGCCACCGATTTTCGTCGTT  
TTTACCTCGCACGCACGACCAGGCGAAATTCACCGGAAATTCGCCGTTGATTGCATACT  
CAAAAGTGGAAGCCACACGCCAAGGCAACGACGATAAATCTAGCATCGAGATCCCC  
CCCATGATCCACCCATGGTCGTCATTAAAATTCTGACAAAATATTTCGTCCAATTAAAGTT  
TATTATTGATTTATAAAACAACGAGGGGGGAAAAAAATCTCGTTTCGTTTCCAACTACCA  
TATCTATGGCTTACGTTTAAATTTTATATATTCATTTTAGTGATTTTAAAAAATAGATTTA  
AATATTCAATGGTGTTGTACAAAATATAATTTTAACAAATTTATGTAAAAGTGGAATGCAA  
ATATAACTTTTACACAGCATAAAAAAATAGTGAAGAAAATAAAATTTTCTAAAGATTAA  
GATTCTGTCATGGATGAGATTAAATGTTGCTGAAATAACAATAAGCAATTTTAAATAAAA  
AAATTGCTTATTTTGTGTTATAAATATTTTCCAAAATTTAAATTTGTTTACAAAGGAGTAT  
ATATATTAAGAAAACATTTATATATATGAAAGAATTTTCGTATGAATTTAAAAAGTCCAATA  
ACTTAATTTTGTGGAGATTTTGCGAATGTGCAAAAGCTATGCAATTTCTTATTTTATTCT  
TTTTTGATACCTCTCACCATTTCTGGACATACTCCACGAAAAAGAAAATTACGGATTTTTT

TTCAAGGGATGATTTACCTCCTGAAAATGCTTTTTGGCACGAAAGAAAATTGGTCTGT  
GTTACGAATAATAACTGTGCTACTCTTTACATGTATGCAAAGTTTTATAATTTTTTTGAAT  
TTCCACGTTTTCTGTCTCCTCCCTTCTGAATAATACATTCAAAATATTTTTACAAATTGT  
GTTTCACTAGTCTCGTGTCTGTAATAGCTAATTAAATCAAATACATGCACTATAATTATA  
TACTTTAACACATTTCGAATCGAATATATCAAAAAAATTATCATTTAATAACTCGAGAAAA  
CAGTGTACCATTACAGAATCATGATTTAAATATTTCAACATATCGTATCTTCCTAACAAA  
AACACGTGGCAAAAACGAGCATTAAATAATCAACAAGGAAGAAGCTTTTTCTCTCGTTTT  
AAAAAAAATGTGCTCTCCAAAGAAATAAAAAACACTCAATTATATCGGTGTAACGAGC  
AGAAGAATAGCATCACACGTTTCGTAGAAAAATATTCAAGCCTCCCCCAATTAAAATC  
GAATCCTCCTATGGTCCCGCACCATACCGCGTTTCTACAGGAACGTTTCAATGAAAT  
TACGGGGTGCATTACCATAAATATTGTTTACAGAATTAGGTATGCATAGCACGTAAAGGA  
TTAGGCTCACGGGCCTCCTGTATGCAAATCGCAGGCTCATCGCCTGATGTACAAATTTT  
CGTGGAACACGCGATGGTTTTTCGAGCGAACGATCTAAATCACCGGCTGCCAATACAGA  
GCGCAGCCCTTTGTCCACGTGAGAGAGCGCCGACAAAGTAGAAGTTGCCCTACTGG  
AATACCGGTATAGATTTTATGGAAGTAGCTGTACAGTACGTAAGGGAAGCTTCGTCCCT  
CCCCTCCTTCCCTTTGTTCGCGAGGAAAATGGGCCGCGAGAATTTTTACGCGGTTCC  
ACCTCACGTAGTCCGCGAAAAGTTCGCCGAAACGAAAGTTATCGAGGTGACCCCCC  
AGCTTCTTGGCTGGCGTCGAGTCCCTCCACACTTCTCCGATTCCGACGGAATAATA  
GCCCTCCCCTCGGTAAATTTGAAACAAACGCGAACCTTTCCTCATCGCGTAAACAC  
GCGTTTATATCGTGAATATTGTTATTCGTGATCAATAATATTACAGCTGTGGCGATTCTGA  
AGGAACTTTATCTTTTCTGGCTCTTTCTCAAATAATTCTTCAAACCTTTTAAATAATTCT  
TTTATGATTTGGAAATTTAATCCGTTTTAGGGATTGATAGGTTGAGTTATAGATATTAATG  
GAATTTTGAATATTGGAAGGATTGAAATTCAAGAAATAATTGCGCAATTATTTAAATACA  
TTAAGAAACGTTATGAAACGTTAATTGAAAGTGAATATATTAATTGAAACATATTTGAAG  
CTGTAAATAATTTAATTCGATCAGCTTCGAATACGATTCCTCCACGTATTCCTCTCCTT  
ATTTCTTATAAAGTTAATGGGCCGTCTAATCGATGGATTCAAGTTTGACGGGTCCACAT  
ACTCGATCAAGTATGGGATAAAAGAGGAATGTTGCGAATGGAGCAGCTCGATCGGGAG  
GGGGAACAGTAATTATACTGTGCGATCTAGACCAATAATAGTGGGCGAGTGGTTTTCAA  
TGTTTACAACCTTCGGAACGTTTTAGCTTCAATTGAACTTGGACCAACTTGGCGCACTC  
AAGGAAGATGAAACGAATGGAAGAGCGAGAGGAAGGCCGCGGTAAGTTCGTAAGTCT  
GAAATCTTGTTAAGGCCAATTCGATCGCGCACTGATGACATCCTTTTATGGTCGGATGC  
CAGTCGTTGATCATCGAATTATTTCACTTCTATTGTAGTTGGACATTTTCTAATTTATTCTT  
CAATATTGCGATCCTGTACACGATCGTTTCGAAATATTTCTTAAATTTGACAAGCTAGCA  
ATTTTATCATGAAGATAATTTGAAATTTAAAAAATTACATAGGAGAATTTATTTTAAA  
GTGATAGTGATTAATTATATATTTTTTATTATTATGGCGTACATACAAAATTTTATAATTGA  
AATTTGTTTTATTTATGATATACAAAATCTTAAATATGTATACTAGTACAACCTTAAAA  
ATCATAGAATTAACAATTGATTCTTTCGTTCTTAAAAATACAATATATTTATTAAATAAAG  
TGAAAAAATCTTCGCTATAAATCTCATCAAAATCAAGATAAACGATGCAAGACAAATA  
TTGTTGTTTACACACTTCAGAATAGTTAAACCATATCTGATAAAGTTACAGAAGAGGAG  
ACATAAAATTTTACAATACCAACAATTTTGAAGATACAAATTGAATAAAATAAAAAATG  
AATCAAGATGAAACTACGACAACGAAACAGAAGAAGTGAATACCTAGAGAAATTATC  
CAGAGATAGAATCGAGTAAATACTTCGTCACTACATTTTTCTTCTTCG

>novel\_circ\_000751

>novel\_circ\_000755

```
>novel circ 000756
```

TAATGAAGGGGACGATTCTAATTTTCTAAGCGTTCTCTCAATGAGAACGATGGGTTTG  
CCGAACGGGGCACCGGTAGATTCATGCCAAGATCTGTTGCCTCGTCATCCTGGAGTTAC  
GAAGCAGGAACTCAGCCTCCTCCTTACCAAGTTTTACCAGCTGCAGGACAAGGTAGA  
GTCCGCTTAATTCTAGGAAGCCCTCACGGTCTTGCTTACGAAGGTTTCATGATAGTTGC  
ACGTGACTCTGAGACCGGTGAATTCGTTGGAGAGTTCGCCAACTTGCCCGATTACAGCA  
AAAATCGTCGAGTGCACACCAGGCGTAAAGAACGCGGTGACTCATACGAATACCAGC  
AAGAAACACAATCTTGAGTTTGATTGGGAGGCACCTATGGATTACGAGGGAACCTATTGT  
ATTCAA

>novel\_circ\_000757

CTACTAACGAGATCGACGTAGATTCCGGAAAGGATATAAAGGATCCTTGCACCGAAGC  
ACGCGAAGAATGTCAAACCATCCGTTGCCCCGATGGCAAAGAGGCGTTTCGTGGACTCT  
CAGGATTGCGAACGATGTCGTTGTGTTGATCCTTGTAACACAAATTTGTCCCGATAA  
CACAAAATGTGCTATTACCTTAGTTGCTACCAAAGATGGTACAGAATACAAAGGAGTAT  
GTAGATCAGTCATGAAACCAGGCCGTTGTCCAAATGTATCGAATAGTACTAGATGCGAA  
CAAGAGTGTCTCACAGATGCAGATTGTTCTGGAGATATGAAATGCTGTAATAATGGCTG  
TGGTGCTTCTTGTATCGAACCAGCCACCGAAGAAATTATATCGACTTCTCCAAGATCGT  
TCGTTACTCCACCTGTAGTTGGTGCTGAACCAGCTTCCATCAAGCAACCAGAGGAGCC  
GAAAGTCAGTGCTCAGGAAGGTAGTTACGTAACATTGAAGTGCATTACTTTAGGAAAT  
CCAAGACCAATGATCACATGGAGAAAAAGCACGACGTTGATTGCACCTTCAGAAGCC  
AGACGTCGCATATTACCCGATGGCTCTCTTCAAATTATTAATTTAGATCGATACGATGGT  
GGAAGTTATGTCTGCACAGCTGACAATGGCTTAGGCCACCGGTAAGAGCAGAATACC  
AATTGACTGTCACAGAACCGAAAGAACTAGCTGCGGCCATCCTCGGGGAGCCTGATGC  
ACGTGTGACAGTTGCCATAAACTCTCCCATATCTCTGCACTGCTACGCATGGGGTTGGC  
CCAGACCTTTTCGTCACCTTGGTGGCGAGGCGAGCGCATGTTGCCACTCGCTTCGGAGAT  
TTACGAACAGGATTCTGAATACACCCTTCTGATTAGAACAGTCACTCTACAGACTCTAG  
GCGTTTACACCTGTCAAGCATTCAACGCAATTGGTAGAGCTGCATCTTGGTGCATCACA  
TTGCAAGCTATCGGTCCAGTGTACAATATCAAGCCCGAGTTCGAACAATATATGAAATA  
CTTGATTGAGGCTCCTAAAAAAGCTGAGAAACCTAGATATCCTTATAGACCCGATAGAA  
CCCAAACCTCCAGACTATCGTCAGATTTATGAAGCTAGTAATACGACCAGACAGAATATT  
CAAATTTCTACGGTTAGTCCTATTGGATGGACTACTTCGGAATACGGTAGGAAATTTAG  
AG

>novel\_circ\_000758

AGCAAGATACCTGTCTCTTGCCCGCACTTTTGGGAGAATGCCACAACCTATACTCAACGA  
TGGTACTACGATTTCGTACGAACAGCAATGTAGACAATTCTATTATGGTGGTTGCGGTGG  
AAACGAAAATAACTTTGTCACCGAACAAGACTGCATTAACAGATGTCAGACTACGATT  
ACTACCCCTGCGCCTGTAAGAGAAATCGAATTTAAACCAGAATTCTGTTTCCTTCCGGA  
TTCTTATGGTCCATGTTCTAATGAACAAATCAAATGGTTTTATGACAGTAGAGAAGGTAT  
TTGCAAGCAGTTCAGGTATGGGGGCTGTCAAAGCAATGGAAATAACTTCAATAATCGC  
GAAGAATGCGAATATCGATGTGGAGATGTTCAAGATGCTTGCACTCTGCCCAAAGTTGT  
TGGTCCCTGTAGCGGTTTTGTCAAACAATACTATTATGATTATCGAGCAGATTCCTGTTA  
CGAATTTGAATACAGTGGTTGTCAGGGTAACAAGAACCGCTTCCAGGATAAGGAATCC  
TGCGAAAAAAGATGTCAGAAACAAGTTGTTCAAACGGAAACAACGCCAAACATTACT  
GTCACACTTGCTCCATCACTTGAAACTGTTTCGAAGAGCCCGATTTGTTATACTCCTGT  
TGATCCTGGTTCTTGCAATAGTGATATCACAGCTTTTTATTACGATTTCGCACAATCAGAT  
GTGTCAAGCATTTCTCTATGGCGGTTGTGAAGGAAACGCGAATAGATTCCAAACAGAA  
GAACAATGTGAACGTCTTTGCGGAAAGTTTTATGGACAAGATACATGTAACCTACCGCC  
GGATTCTGGTGAATGCCGAGGTTACTTCCAAAAATATTACTATGATTCAGTCAACCGCG  
TATGTCGCGAATTTTCATACAGTGGATGCGAAGGTAATGCGAACAGGTTTAGCTCAATG  
GCCGAGTGTGAATCTGTTTGCATTCATCACGAGGAACCGGTGCCTCCTGGAAACGATA  
CCAATCTTTTAAGCTTGTCAAGTTGTAAAGAACAAGTTGACAGTGGGTCTTGCACTTCT  
GGTGCTACCAAACGATTCTTTTTTCGACGTTGAAGAACAACCTGTGCAACGTTTCATTA

CACTGGATGCGGTGGAAATCGTAACAGATTCAAGACCTTTGAGTCTTGTATTAGTACTT  
GCCTTAGCACTACTAACGAGATCGACGTAGATTCCGGAAAGGATATAAAGGATCCTTGC  
ACCGAAGCACGCGAAGAATGTCAAACCATCCGTTGCCCCGTATGGCAAAGAGGCGTTC  
GTGGACTCTCAGGATTGCGAACGATGTCGTTGTGTTGATCCTTGTAGAACACAAATTTG  
TCCCGATAACACAAAATGTGCTATTACCTTAGTTGCTACCAAAGATGGTACAGAATACA  
AAGGAGTATGTAGATCAGTCATGAAACCAGGCCGTTGTCCAAATGTATCGAATAGTACT  
AGATGCGAACAAGAGTGTCTCACAGATGCAGATTGTTCTGGAGATATGAAATGCTGTA  
ATAATGGCTGTGGTGCTTCTTGTATCGAACCAGCCACCGAAGAAATTATATCGACTTCT  
CCAAGATCGTTCGTTACTCCACCTGTAGTTGGTGCTGAACCAGCTTCCATCAAGCAACC  
AGAGGAGCCGAAAGTCAGTGCTCAGGAAGGTAGTTACGTAACATTGAAGTGCATTACT  
TTAGGAAATCCAAGACCAATGATCACATGGAGAAAAAGCACGACGTTGATTGCACCTT  
CAGAAGCCAGACGTCGCATATTACCCGATGGCTCTCTTCAAATTATTAATTTAGATCGAT  
ACGATGGTGGAACTTATGTCTGCACAGCTGACAATGGCTTAGGCCACCGGTAAGAGC  
AGAATACCAATTGACTGTCACAG

>novel\_circ\_000759

ATGAAGTGATACCTGTGCAACCAGATAAGATCAAAGATCTTACCGAGGAGGATGATGA  
ATGTGAAGTATATGAGGACGAAGACTTTGTGACTGTCTCATCTAGTCTTACGCTTAGCG  
ATAAATCCAGCAAAAATGTCAGACCTTACTGAGGCAACTCCCCTAAGTTCACCAAGCAC  
AGACAATTCTACTGAAACGACATGGACGATTTAATGCTCAATGATGATGGTGCCACTC  
GAGGCGACATATCTCCTAGAGAAATGGAAAATGCTGAAGGAAGCGGAACAGATTTTAC  
CGATACGTTTTTCTATACTTATACATCGGAATTTGAATCAACATTCGAAGGAAGTGGAAC  
CAGTGAAATCACAGAAGAAAACGAATTGTTTACAACAGAGTCTGGAATGATGGAAAC  
TGATGTTACCGAGGAGACTGTCTGAAGGATCCACCATGGATTCCACCGATGAATCGGTG  
ACGCAAGAAACTCTAGCATCTGGAGAAACAGATATAACAACCGAATCAGGCGCAACTG  
AAGCAACGACAGTTTCTTCTGAGAGCGAAGCAACTGAAGCCACATCGATGACAGAAT  
CTATGGAGACTGAAGATACTGGGCCGTCAGAATCCACTGAATCAGGTCCAACAACCTT  
TTCATCGGAAAGTGAAAGCACAGTTACGGAACAAGAGATGACTGAAGAATCTGTATCA  
ACAGATATAAAACCTGATGGCACAGATAAGACTACAGAAACAAGTGTTACTGAAGAAA  
CTACTGAATCAGGATCTATAGAACCAACAATGTCTGACAGAATCAGGAATGACAGAAGA  
AAGTACAGAATCTGGAGCCACAACAGAATCTGGAGCCACAACAGAATCTGGAGCTAC  
AACAGAATCTGGAGCCACAACAGAATCTGGAGCCATAACAGAATCTGGAGCCACAAC  
AGAATCTGGAGCCACAACAGAATCTGAAGCCTCAACAGAATCTGAAGCCCCAATAGAA  
TCTGGAGCCACAACAGAATCTGAAGCCCCAACAGAATCTGGAGCCACAACAGAATCT  
GGAGTTACAACAGAATCTGGAGCTACAACAGAATCTATGCCAACTGAAATTACAGAAT  
CAACAGAATCTGGAGCTACAACAGAATCTGAAGGTACAACGGAATCTGGAGCCACAA  
CAGAATTTGAAGGTACAACAGAATCTGGAGTCACTACAGAATCTGGAGCAACAACCTG  
AATCAGTATCAACAGAAGCTACTGAATCAACGGAATCTGGAGCGACAACCATAGAATC  
TGCCCCGACAGAACTACTGTATCTGGTGAAACTACAGAATCTGGTGCAACAACAACA  
GAAGAAACGACGATTTCCGGCGAGACTACCGAATCGAGTGAAACTACAGAATCTGGTA  
CAACTGAGAGTGGTGAAACAACCTGTTTCTGGAGTGACAGAGTCAACTGTTTCCGGATT  
GACACCGGTTACTGATGAAGAAGAGACCGAAGTAACTGAGAAAACACACGTAACCTGA  
ATTCTGGACAACACTCGCTCCGGAAGAGGTCACACGCAAACATCGCGTCTGCAAGGT  
GCCTAAGAAGAAAAAGACCTGCAAAGCCATGTCGTTTGGTTGCTGTTACGATGGAATC

ACTGCAGCGCTAGGACCATTTAGCGAAGGATGTCCACGGCCCAGACTTGCAATGAGA  
CCAAACACGGTTGCTGTCCTGATGGAGTATCACCAGCCACTGGCCCAGAGAACAAAG  
GCTGTCCCGAATCTCTCTGCGATGAAACATTGTTTCGGTTGTTGTCCAGATGGAGTTACC  
ATTGCTGAAGGTAATGATTTTGAAGGATGCAAGAAACCTTGCAACAAGACAGAATTTG  
GATGCTGTCCGGATAACGAGACACCGGCTAGTGGAGAGAATAACATGGGATGCTGCAA  
TGGCACTAAATTTGGTTGTTGTCCCGATGGAATCAAGCCTGCTTCTGGACCAGATGATG  
AAGGTTGCGAGGAGGAGATCACTTCTATCACTCCACTTACTGAAGAATATGAAACGAC  
CACTGTGCAGGAAGATTGTTTGAATTCCACCTATGGATGTTGTCCGAATGGTATTTCCAT  
TGCAACTGGCGCCAATTTGAGGGATGTGGTATTATCAATGCGGAGAACTGTACTATAT  
CGTACTTTGGATGTTGTCTGATGGAGTATCACCAGCTCTTGGGCCTAATAATTACGGAT  
GCCACATGCTCTGTGAAAATAGCACCTATGGTTGTTGCGAAGATGGTATTACTCCTGCA  
CATGGTCCCAACAGAGAAGGTTGTTGTCTATCGACACAATACAAATGTTGTCCGGATAA  
CATACTTCCTGCTCATGGTCCCGATTTCTACGGCTGTGGATGTCAATACACGAGATTTCG  
ATGTTGCCCCGATAATAGTACCACTGCTCGTGGACCGAACAACGAGGGTTGCGGATGC  
AAATACACGCCTCATGGTTGCTGTCCAAATCGTTTTACGCCGGCCACAGGACCGAATTA  
CGATGGTTGTCCGTGTTATACGTATCAGTTTGGTTGTTGTTCTGATGGTGTCACCATTGC  
GAAAGGACCACATGGACAAG

>novel\_circ\_000761

ACGGAAAGTGAATATTCTGTAGAAGAGCATGCAAAATTAAGTCTACTGATGGAGCTA  
GTGATGAAGCATCTCCAGAAGATGAAGGAGGATCATTATGTGAATACCATGACATACCA  
CCCCACCAGATGGTGGATATGGGTGGGTGGTGGTATTTGCATCATTCATGTGTAATATG  
ATAGTTGATGGTATCGCTTATACATTTGGTGTTTTTTTGGGAGAATTTGTTACATATTTG  
GAGAAGGAAAAGGCAAGACTGCATGGGTGGTTCATTGTTATCTGGCATGTACCTCAG  
TGCTGGACCTATTGTCAGTGCTTTAACAAATAAGTATGGATGTAGAGCAGTATGTATGGC  
AGGAAGTTTTTTAGGTGCAGCAGCATTTGTACTTTCAACATTTTCAACCAGTGTAATA  
TGCTTATGATAACTTATGGTGTATGGGAGGAATTGGATTTGGTCTAATATATTTGCCAGC  
AGTAGTTTGTGTAGGTTATTATTTGAAACCAAAAGATCATTAGCTACAGGTATTGCTGT  
ATGTGGTTCAGGATTTGGCACATTTGCATTTGCACCTCTTGCAACAATGTTATTAGAAG  
CATATAATTGGAAAGGAGCAAATTTAATTCTTGCAGGTCTTATTTTAAATTGTGCTGTAT  
TTGGTGCAATGATGAGGCCATTGGAATATCCAAAAGCTTCTTCTGTAAACCATTGTTA  
CAAAGAATGGCAGAGGAAAAAAGATTTCAAATGGAACGTGGGAGTATTGGGGTTCT  
TATTTTCATGGTACAACCTGCCTGATGGATCTATGGAAAAGAGAATGAAAATGCCTATTAAT  
ATTGATCCTGGTGTTCATTCCAGTTTCAATTTAGACCAATTAGTGCCTGGAACCTCTTA  
ACACCAGTTCCAACGGTACCAACTCTTCCCCTATATCGGAAGTGAAAGTACAAGAAC  
ACTCTTCTAGTGGAGCAACTAGTAATAGTGGCAGTATGGACTTAAAAAACATTTCCACT  
AAATCAAAGAGTAGAAAAAATATTGATGATACCAAAGATATAACAGAGAAGTCTGAAA  
GCGAATTCAAACCAATAATTCCTAGAAATGCTTCACAGCCTGCTTTCACAACTCATGTA  
CAAGGTTTACCTAAAAATGGTTCTGTACCCTTTTTTGATAGAATTCGCAAAACAAGTAC  
TGGTGAAAGGTATAAACCAAGTCTTAGTGCCATTAAGAATTCTAGAACAACATTGAATT  
CTAATGGTGATATTAGAAAAAGTTTGCATTTGAGACTTTCGACAAGCAGTGTTATGGGT  
TCTCGAAATAATAATGCGGAAATAGATGATGGCGAAAGTATTACTTTTACCACCAGTAA  
AACTAGTATTCCAAAAGAAAAACCACAGATAATTCGACCACTATCAAGAAAGGATATTT  
TTTATAGTGGTAGTGTTGTTAACTTACCAGAATATCAAAGTCAAAGTCACTTGCAAATT



ATCGTCAAAGTGTTATTTCTTTATCAAAATCCGTTTCGTGGAGATATTAAAGACACCGATA  
TTGAAAAGGCGCGCGAACAACCTCTATGTCCTTGTTTGGTATTACCTGATTTCGTTCAAA  
GAAGCTCTGGCAACTATGATGGATGTATCTTTGCTAAAAGATCCAGTATTTCTTTTAATT  
GGTATTAGTAACGTATTTGGAATGGCTGGTTTATATGTCCCTTTTGTATATTTATTAGATGC  
TGCAGTCTTAGATAATATTGACAAAACCTCTTGCATCATATTTAGTATCTATTATTGGAATT  
ACTAATACTCTGGGTCGTGTAGCTTGTGGATACATTGCGGATTTTCCACAAGTAGACTC  
ACTATTGTTGAATAATATCTGCTTAATTATATCAACAGTTGCTGTGGCTGCAATTCCATTT  
TGTCATTCATATCCTGCTTATATTATTATGAGCATTCTTTTTGGAATAGCTATATCTGGATAT  
ATTTCTTTGACGTCAATTATTTTGGTAGACCTTTTGGGATTGGACAAATTGACCAATGCA  
TTTGGCCTCTTAATCTTATTTAGAGGAGCAGCAGCTATCATTGGTTCACCTTTAGCAGGT  
GCTGTTTATGATGCAACGCAAAGCTATAGCATCCCATTTTTTATGGCAGGATTTTTCTTC  
CTTGTAAGTACAGTTACTAGTTTCATGGCTCCAGCAATGAAACGCTGTACAACGCCACA  
GACTCAGCCTGTGATATTAGATACATTGACTCCAATTGATGAAGATATCGAAGAAGAAA  
ATGAAGAGGATATTCCTGAAATTGTAGAAACTGCGCCATCTCCGCAAGAACCCTCTGA  
AAAAGAAATTAACAAATAGAATCTGTTTTATAAAATCTGATCTGTATAAGGAGAAAAA  
AAAAAGCCTTCATCTCCGAGCCATACTGTGATAGGGCTGCTGCTTCAAAAAG

>novel\_circ\_000762

CCAACCGTGGACGACGATGGCGTCGCTGGGGAATAAAGTGGATGAGCAAGTCGCCAA  
GGTACCGCAGCAGAATGGACGTAGGAACGAGGAACAACCTGCAGATGGAAGATATTCA  
CGACAATAACAACGAGAGCATCGAGGTCGAGATGGTGGTGCCGCCGGACGGTGGATG  
GGGTTGGGTGATCGTCGCAGCCTCCTTCATGTGCAATCTGTTTCGTGGACGGTATCATCT  
TTAGCTTCGGTGTCTTTTTAAACGACATATCGGACGCATTTCGCGGTGTCCAAGGCGAGA  
GTGGCGCTAGTTGGCTCCCTGCAATCTGGATTTTATCTTATGGCTGGTCCATTCGTGTCA  
GCGTTGGCCAACAGGTACGGTTTCCGGTTGGTCGCGATCCTCGGAAGTGTGATAAGTT  
GCAGCGCTTTCGTTCTCTCGTACTTCAGCACTTCCATCGAGTTCCTTTACATCTCTTACG  
GCGTGCTCG

>novel\_circ\_000763

GAATGCTGTTGAATTGCTCCATTTTCGGCGCCATGTTCCGTCCACTGAAACCAACAAGG  
ATTAAGGTGAAATCCACCCCGGAAAACGCTGGTTTAGAGGTAAAGAATAGCTTGATAG  
GGAGGGGAGTGTCCATGGCATCATTGCACTGTGTCCAACCAGAAAGAAGTGGTTTCTT  
TGGGACAAACAACAATACAGATTATCCCACTGCCGCAGAATTACTTGGAAGCAACCCC  
AACATAGTAAACGCTTCCAAGTCCCTACATTCTCTTCACAAGATTCACGTGGAGCTACG  
AACCCTAGAGAGAAAGTTGAGCAACTCTGAGAAACGACTGTCAGTCCCGATATATCCA  
GAGTTGGACATGAATATAGATGAAAAAATCGTCGAGGAGGAGAATAATCTCCTCGGTG  
GAGATGTTGAAAGACTGAATGGCAAAGTGCCACG

>novel\_circ\_000764

CGTTCCAAGTCCCTACATTCTCTTCACAAGATTCACGTGGAGCTACGAACCCTAGAGA  
GAAAGTTGAGCAACTCTGAGAAACGACTGTCAGTCCCGATATATCCAGAGTTGGACAT  
GAATATAGATGAAAAAATCGTCGAGGAGGAGAATAATCTCCTCGGTGGAGATGTTGAA  
AGACTGAATGGCAAAGTGCCACGATTCGAGGCACACGATCAGCGGTAGACGACAA  
CGCGCGGACTCGGATTGTAGCCAGAAATCGTTGAAGATGGGCAACAGGCGTAACCCAT

TTAGCAAGGATCCCCAGAGACCGTTCTACAGGGATGATATCTTTTATGGGGGATCCCTA  
AACAGGTTGCCGCATTACAAATCTCAGCAATCGTCCGTTGGCTATCACATGTCCGTCAC  
GCGTTTGCCGACTGCGACGGATGTCGCCGAGCAGGAAAGCGGAAGTTGCTACATTTGT  
CCAGAGAGCGTACGTCTGAATTCTTACTACCATGCTCGATATAAGCCTTCTGAAGAGCCC  
TTCTTTCTTGATCCTGGCCATCTCTGGTGGGCTCACGATGATGGGTTTCTATACACCCTT  
CATGTACGTTCCAG

>novel\_circ\_000765

AAAATTTGTACGCGAACAAAAATTTTGAGTAACAGCTATAGTTTCATCAAGATTTAAAA  
CAACATGCCACCAACCACCAGGAACAAAAACAGTTTCACCAGGATTTTGTAATCTC  
TATTGGTAAACAATCTTGTGGCCATGTAGGCAATTTTGTACGTGGATAAATAATGGAAA  
ACCATGTAATAGCTTCATCTCTTTGTTTGCCACCTTCAGCTGCTGATACTT

>novel\_circ\_000767

AGCGCATTTTCGATGCATCCGCAAACGCCAAAGAGAATTTCAACGCTGATTCCACGG  
TGATCCTTAGCGGGCCAGGGAACGTGAAACATCGGAAAGAGAAACATCTCACGGCAG  
TTCAATGGCAGGTCGGTTGTGACGGTCATTTATGGAGACACCAGACAGATTTGGTGAA  
ACATCTGCGAGAACAAGCGAAGGATGGCACTCTGGCGGAAGTAATGCAACTTCCGGT  
CCTATTATGGCGCGTTAAACGGAATCGAGCCTGTTGCTAAGAAGCAGAAGAGAGAGC  
GGTTCGGGCATTATAGTAATCCGGATTACGACAGTTACGACGATTACGATATTGAGTAC  
GATGGTGAGGATGGCGAGGATGGCGAGGACGGCGAGGATGGGGAGGACGGCGAGGA  
TGGGGATGACTCGCAAGTACAGCCAACGTTTCATGCCCCGAACTAATCTTGCCCCGGAG  
CATCCTCACAGGCATCACCATGGGGAGGAACCTATCGATTGGAACACCGAAGATGATA  
ACGATGATCTTATAATACCCGACACGCATCCAGACATAATAGAGAGCGTATTGAACAGA  
ACTACTACGGATGCCATGTCAACT

>novel\_circ\_000768

GACCGAGCACATGGGTGTCTGAAGTTCCCAATGGCGGCTGGATCGAGGCAGAGTCCTG  
TCAACATCGAAACCGACAAAGTGGAATCCGATCACGAGGCTTTAAGTAGCAAACCTTT  
GCGCTGGAAATATCCAGCAACCGCATCCCGGAAACTCGTCAATCCAGGTTACTGCTGG  
CGGATGGACACCGATGGCGAAGGCACATTTTAAAGCGGTGGACCTTTAATGGACGACG  
TGTATAAACTGGAACAATATCACTGTCATTGGGGATGCAGCGACTCGAGAGGATCCGA  
GCACACTGTGAACGGACAAGCCTTCGCGGGAGAGTTGCATCTGGTGCATTGGAACAC  
AAGTAAATACAACACCTTTGCCGAAGCTGCAAAAGCGTCCGACGGTCTTGCTGTTCTT  
GGCGTATTCTTGAAG

>novel\_circ\_000769

GAAATCCGGGGACTCGAAGGAGGAGGACAGGAATGAAATTCCTGTGGGCGAGAATCG  
TTGCGCCTGTTGCCTGAGGCCACTTTATCTGGGCCGCGGGGTTTCGTTGCAAGGATTGC  
GGTGAAAAATCGTGCAGAAAAGGCTGCTCCCGTTTCGATCCCTCGGACAACGCTTGGC  
GTTGTATCTTTTGCCGTCAACAAAGGAATTGGTTGGAGAGGCACGGACTCGAGGCGTT  
CGGTGGATCGATCAGTCAGGAAGATCTACGTTTCTACTTCAATACGGCAAAATCAAGG  
GTTTACGTGGAAG

GAAATCCGGGACTCGAAGGAGGAGACGAATGAAATTCCTGTGGGCGAGAATCG  
 TTGCGCCTGTTGCCTGAGGCCACTTTATCTGGGCCGCGGGGTTTCGTTGCAAGGATTGC  
 GGTGAAAAATCGTGCAGAAAAGGCTGCTCCCGTTTCGATCCCTCGGACAACGCTTGGC  
 GTTGATCTTTTGCCGTCAACAAAGGAATTGGTTGGAGAGGCACGGACTCGAGGCGTT  
 CGGTGGATCGATCAGTCAGGAAGATCTACGTTTCTACTTCAATACGGCAAAATCAAGG  
 GTTACGTGGAAGCTTGGAAGTAACATCGCGCACTCCCGTAATCCTTTCTTACCTCTT  
 TCTCTCGCCGAGCCATCCCCGCGAAACAGATCCCCGTGAAACGAGTCGCGAACTCTTC  
 TTAATCGAACTTCGTCTCCCTTCTCTCCCTTAATTCTCTCCGTGCTCTTATTTTCGGTATT  
 TAAAAAAAAGAAAAAGATTTGCTCGTTCCGGCGTTGTGTAAACCGCAAGGTGATTGTCA  
 GGGTCCAAGGCGAGGTGGAGGATCGTGTATATATGTATGTATCGATAATTGAAACGTGC  
 ACGCGAAGGACGGAAGTCGGACGGACGGACGCGCGTGAAAGCAGGTCTCGTTGGTG  
 AAAATCGACGAGGGGGGAAGACGTGTTTTCTTTCAGTTCTTTTTTTTTTCATCTTCTTCT  
 TCTTCATCTTCGAGTGGA AAAAACGAGGAGGAGGAGGAGGAGGAGGAGGAGGAGGAGGA  
 GGGCCGGAGAAAAAGAAAGGTGGACGGTCTCAGTCGTGGATGAAGAGAGGTTTCGAG  
 ATATAACCGGTTTTTGCGGCGTTTAGAAATGGAAAATACCCGACAAGGACGGCAGAGGC  
 GCGCGAAAGTCGCTAATACCTAATCAAGAATGAGGATGGATCGAAGGGATTGGA AAC  
 GTTTGGGGGAACGCGCGTTTGAAGGAGGAAGGGAAGGGGAAAAGTTGATTGGA AAA  
 GAGATTGTGAGAATTTTTTCTCGCTTACTTTTCTAAACATTTTCTCTCGTCCGTTCAACG  
 AACGTGCTGTTATTTGCTTAGCTATAGCGGGAGGGGTCTACGAGAGGAGACTCTTCTCT  
 GAGGAATCTTCGTCGAGTATTTAAAAAAAATTGCAAGTGGAACTTTGAAAATTTTCTC  
 AATTTTCAAATCCTACCGTAACGAAAAGGAAAAGCAAAC TAAGATAGACTTAAAAGA  
 AAAAAAGAAAAAACTTGAATAAACTTGTTTGGAGAAATTTAAAAAGAATCGTTTAAC  
 AGAATAATAATAATAATTAAAAATTGCATAATACGAAAGAATGCTCATCAACGCTCGAA  
 CGAATAAAAACTTTTCTAGAAACGCACAGATTTCCCCGGGAGAAAAATTATCCTATCT  
 GCGGACAATGATCGATGGATAGGAAGGGGAAAAGAAAAAAGGAAGAAAAAAGGAAA  
 TAAAAAAAAAAAAAAAAAAAAAGGGAGCATAGAGGATCATCGAGAAGGTTGGAGAAGG  
 TTGTATCTTAAATCCGCCGGAAGGCGAGAGGTACGACGCGCGCACGGTGGGAGGGGC  
 GATCACGAGGAGGAGGAGGAGGAGGATATCCTCGAGCAAAGATCGATGTCTGTTTCG  
 GCTCGAGCGGCCTCGAAGCCGCCGTGTGATAACTGATAAATATACCGGTCTCTCTTGCG  
 GTACCCGGTTAAGAGAATGCGGTTACAAACGCGAAGGGGGAAAAAAGGACCACGGT  
 GG TAGATCTTTAATGGTCGTCGATACTTTCGTTTAGAAAGCGCGGCCGCGCGTGTCA  
 GTGACGGGGATTTCGCGATCGTGCCGCGTCGTTCCCTTCGAATCGATACCTCGAATCGTC  
 GCGCGCCGATTTTCGACCACCGGTCGGCCATTGTAAACAAACCGTCCGTTCTTTCTTCT  
 TTCTTTTTTTTTTTCGAAAAATATGCGCGCCGACACGCGCTCCGATGAATATTCGTTTCGA  
 CGAAGGGAGAAAGTTTCTGCCGCGTGAATGAGTGGCGTGATTAATTAAAGGAGTGGA  
 AAATGCAGCTACCAGTTCGGTACAAGATTTGGCCGCGGAGAAAGAAGAGGCGAACAC  
 GATGGAAACCTTTTCGAGATTTTGTGCGAGAAGATAGTGTTGGTTTGATCGGCAACATG  
 GACGTGCCGATCAATCGTGTGGTATATCATCATTCGCCGT

GAGTGGAAAATGCAGCTACCAGTTCGGTACAAGATTGCGCCGCGGAGAAAGAAGAGG  
CGAACACGATGGAAACCTTTCGAGATTTGTGCGAGAAGATAGTGGTTGGTTTGATCGG  
CAACATGGACGTGCCGATCAATCGTGTGGTATATCATCATTCGCCGTGTAAGTTGAAAC

ACGTAGGACATGTTGTACAAGCACATGGCAAGCTTTTGGAAAAACACCTTGTACCCTT  
GATCGATGCACTCGCGAGTTTGGCTATAGTACTGCAATCAGCTTTAGAGA

>novel\_circ\_000772

AATTGTGATCCAAATGGGCCACTCATGATGTATGTTTCAAAAATGGTACCAACTTCTGAT  
AAAGGACGTTTCTATGCTTTTGGTCGTGTATTCTCTGGAAAAGTAAGCACTGGAATGAA  
AGCACGTATTATGGGGCCTAACTTCCAACCGGGTAAAAAAGAAGATCTTTATGAGAAA  
GCTATCCAGCGTACAATTTTGTATGATGGGTCGTTACGTTGAAGCGATTGAAGATGTGCC  
TTCTGGTAATATTTGTGGACTTGTGGTGTTGATCAATTCTTAGTAAAACTGGTACTAT  
AACCACCTTTTAAAGATGCACATAATATGAAAGTTATGAAATTTTCGGTTTCACCTGTCTG  
CCGTGTTGCTGTCTGAACCCAAAAATCCAGCCGATTTACCCAAATTAGTCGAAG

>novel\_circ\_000773

GACGTTTCTATGCTTTTGGTCGTGTATTCTCTGGAAAAGTAAGCACTGGAATGAAAGCA  
CGTATTATGGGGCCTAACTTCCAACCGGGTAAAAAAGAAGATCTTTATGAGAAAGCTAT  
CCAGCGTACAATTTTGTATGATGGGTCGTTACGTTGAAGCGATTGAAGATGTGCCCTTCTG  
GTAATATTTGTGGACTTGTGGTGTTGATCAATTCTTAGTAAAACTGGTACTATAACCA  
CTTTTAAAGATGCACATAATATGAAAGTTATGAAATTTTCGGTTTCACCTGTCTGCCGTG  
TTGCTGTCTGAACCCAAAAATCCAGCCGATTTACCCAAATTAGTCGAAGGTCTTAAACGT  
TTGGCAAAATCAGATCCTATGGTACAATGTATTATTGAAGAATCAGGAGAGCACATTATT  
GCTGGAGCTGGAGAACTTCATCTTGAAATTTGTTTGAAAGATTTAGAAGAAGATCATG  
CTTGTATACCTATTAAGAAATCGGATCCCGTCGTTTCTTATAGAGAAACAATTTCAGAAC  
AATCAAATCAAATGTGTCTTTCGAAATCACCTAACAAGCATAATCGTTTATTCATGATGG  
CATGTCCAATGCCTGATGGTCTTGCTGAAGATATCGATAGTGGTGAAGTTAATCCAAGG  
GATGATTTCAAAGTACGTGCTCGTTATTTAAATGAAAAGTATGACTACGATGTGACTGA  
AGCTAGAAAGATTTGGTGTTTTGGACCTGATGGAAGT

>novel\_circ\_000774

ATCCCAGACTGCTCCTCTTCCCACACGTTTCAATCAAGTGCCATACAACGCTCAGCAGA  
AGACTGTGATACGCATTACCTATGCCTAGAATCCGTTTCGTTTCATCACGTAGACGATATTA  
GGACGATATTAGTCGAGCAAGATCGAAGAAGAGTGGGAGGCTCGGTGGGGTACGCCA  
CGTTGATAAGAAACGCCACGATTAGACGAACTGGAAAGAGAAGTGGAAGACTGCGAG  
GGAGAATGTCGACTTGCACCGACGAGGCCGACAACGCACCCCTGCACATGCAGGAGG  
CTCTATCCCCG

>novel\_circ\_000775

ATCCCAGACTGCTCCTCTTCCCACACGTTTCAATCAAGTGCCATACAACGCTCAGCAGA  
AGACTGTGATACGCATTACCTATGCCTAGAATCCGTTTCGTTTCATCACGTAGACGATATTA  
GGACGATATTAGTCGAGCAAGATCGAAGAAGAGTGGGAGGCTCGGTGGGGTACGCCA  
CGTTGATAAGAAACGCCACGATTAGACGAACTGGAAAGAGAAGTGGAAGACTGCGAG  
GGAGAATGTCGACTTGCACCGACGAGGCCGACAACGCACCCCTGCACATGCAGGAGG  
CTCTATCCCCGGTGCAGGAGGGGCCAGTGTCTCCGGCATCCTCCTCGCTGAGCAACCA  
GAATCAAAACGAGAGCGAGCAGCAGGTATTACTCGCGACGATGCAGCCTGTCAACGTT  
CTAGACCTGCACGAGCCAGCCACAGTTCACCTCGCTCCATCCCAAGTACCATCATCACC

ACCACCGCCATCACCACCATCACCACCACCACCACCATCAACAGCAACAGCACATCCA  
GCCGGATCCGGACGACGTCCAACAGAGGGGCGACGATCCCGACGGTCGAGTGACGCC  
TGGCGCCGACCCAGCCGCCGCCAACACGACGCTGGGCGTCGGCGAGCACAAGATGAT  
CGATCTGATCTACAACGACGGCCAGAAGACCGTCATGTACACCCACGACAAGGAGATC  
ATCTACGAAAACGAGGCGGATCGCGTCCAGGTGGTCGAGTACCCACCCCGCCACCCT  
CGCCGCCATCCCCCTCGCCACCCTCCGCGGTACCAGAGCCGGACTACTGCCGCCCGC  
CTGCGTCACACCCAGATCCGGCTCCGCGACGGCGTTGCACCTTCATCATTATCCCCAAC  
TGCAGTTGCAACACGAGGACGACCTTCCACCGGGTGTCCGCCACGCGGTCAACGCCA  
CCGTGCCTAATTGTGGCGCGGCTACGACGACCACCACCGTGCTGGTGCTCTCGGAATT  
GGTCGCTGCTGACCCCGCCGCTGGTGCTGCCGCTGCCCAACAACCTACCCTACCGCC  
GCCGCCGCCGCTGCCTCCCTTCGTGCTGG

>novel\_circ\_000776

ACGGCGAAGCCGCGGGGAGGAGGACACGAGCGGCGTTGAGGAGAACTCGCAGCAGC  
AGCAGCAGGCGAGCTACGTGGGGGGAGGTCAGCGCGACACGGAGGAAGAGGAAGAG  
CTGGGGGCGAGAGGAGGCGGCGGCGCAGGCGGCGCAGTCCCTGCAGAGCGGCGCCGA  
GGGCGCCGATCCGGAGGTACACAAGAGGGTTGCTGCGGTGCAGGTGCAGGTGCAGGG  
TATGGAGGGCGACTGGCGGACCTACTGCGAGCACCCGCTCTCGGTGGCGACCGCGGC  
CATGCTCAATCTTCAACAGCAGCACCAGGTCTCGGCCGTGGCGAGCCACGGCGACGA  
CCCAGCCCCCTACGTCTACGAATATTACAACTGCCCGACAAGAACGCCGACGTCAAG  
TTGCCGCCTACCCACGAACCTTTGGTCCAC

>novel\_circ\_000777

GGGTGTGATGGGCCAGAAGCTGCTGGTGCAGGAGGCGCCTGGCTCCGGTTCCGGTTC  
GGCGAATCGGATGGAAGGCGGCGAAGGCGCCGGTGGGGGGGAGCTGCACCACTTCCT  
CCACCAGTACAACCAACAGTCCCACAGTCCCGGGCAGAGCCTGCAGGGTGGCCTTCC  
GCTTCCGCTCAGCCCGCAGTCCCTCAGACACGACGGCTCCTCGAGCACCGGGATCGCA  
GGAGTGAAAAGGGAGCCGGAGGATTTGAGCTCGTCGAGAGGGGCGCAACAGTCCAG  
CAAAAGGCACAAGCAGGCGCAGCCGGACAGTCCCACGCCGCCGGGGATGTACCATCA  
TCATCAGCATCAACTGCAGGTTCAACAATACGGCAGCCCCCTACGACCCTTACAGCTCGT  
GCAGCCCCCGGCTCCAGTCAACGACGTACACGTGCACCTCGGCGACGGGCGCAGCCA  
ACACCGGGAATCCGAGCGGGTTGCACCAGGAGGCGACCGCGGTCTATGTGACGGGGG  
ACGCCCTGCCACCCTTGGCATCCTCGAGCTCGTCCTCGTTATCGACCACCACCGCTTCG  
TACACGAGGTACGAGGTTGTGCCAAGCTCTTACGCGACGACACACGCGATACGCTCCT  
CGTCGAGCAGCAGCAAAGTCCTCACCGTTGATCTTCCCAGCCCCGACTCCGGGATCGG  
CGCGGACGCGGTACGCCCAGGCAAGATCATCATCCGCCACGGCGCTGCATCAG

>novel\_circ\_000778

ACAAAAACAATAGATTTTGATATAAAAGGAATTAAGGGAGAAGCAATAAAAACTCATA  
CCAAATATCAACAAAATAATAATTTTTTGACAATTGTTTCCTGCTTTACCCATTTTACCTG  
GAGCTCTTGATACCATCAAAGTTATTTAAGCGTCGTTATAATTCATTCAGTCCAACAGATT  
CTCCATTTAATATAGAATATGACAAAGTTAATGGTTCTAATTCAGTTAATTTACAATGGAC  
AAGCGAAGGAAAAACTGTCATGGCAACAAGAACAGCTTCAGAAAAAGAGAAGAATC  
CTGACAGAATATGTCTTGATAGAAGGGGACTTACTTCTTTTCCAAACATAATTGGAGAA

CCACGTTTGC GTTTATTGTCTCTTCAACATAATCTTCTTACAAAGATTGAAAATTGTAAT  
TTTTTACAATTAACAAAATTAGTATTTCTTGATTATATGATAATCAAATTGAAAGGATAT  
GTAATTTTGAAATATTAGAAAATTTAAGAGTATTATTGATTGGAAAAAATAGAATAAAAA  
GAATTGAAGGATTAAATCATCTTTCTAAATTGGAAGTTTTAGATCTTCATGGAAATCAAA  
TTGTACAAATTCAGATTTAAATAATCTTATATCTTTAAAAGTGTTAAATTTAGCTGGAAA  
TAATATTAATAATAGGACATAATGATTTTCAAGGTTTAACATCATTAAGAATTAATA  
CCTTAGACGTAATAAAATTAAGAAGTTATTAGGTTTTGATGAAACACGACAACACTACAAA  
AATTATATTTAAGTAATAATGATATACATAAAATTGAAGATATAGGAAATCTTGCTAAAGC  
ATTACAGCTTAGAGAAATAACAATTGATGGAAATCCCATAACATTAAATGGAGATTATGT  
TTCTTTTCTTGATCATATTTACCAAATTTACAATCTTTATCAACAATGCAAATTACTGAA  
CAAATTCGAAGAACTGCTGTGGCATGGAGAACAGCAAAAGAACAAAATAATTCTACTT  
TTTTAAATCTTAGTGCACAAGTTTGTATGAATGCTCGACGAGAAGAAATTATATCGAATG  
CTAAAATAAATTGGGAACTTCTCAGATCTCATTCTAAATCGTCGATAGATGATCACAATA  
AAAATAATAGTCGAAGCAATAATATTAATGCAGTACAAATTCAAAAATCGGATAAATTC  
AATATGTTAAAACAAAATTTAGCGAAAATAAAATCGAAAGGTTTTGGGAGTTTAACATC  
AATAAATGAAAATGTAGAAGCAACAAAATAAATATAAAAAAAGAAGTAACTCTAAT  
GATAATTTATTTAGATTAAAAGATACAACATAAGCATATCAATTAGAATTTAAACTTCCA  
CCAATTTTAGATTCTATTATAAATAGTTTAATAAATAATAAATTTGAAAAATAAAAAA  
AATCTAACAGAAACAAAAACTAAAAATAACATTGAAAGTCTAACAAATAGTGATTGAG  
AAATTTTAGAAAGTTCTGAAAATATACAAAGTTATTTAAATTCTCATTTAAATTAATTT  
CATTAACCTCTAAAAATTACATTTCTCATAATATTAATAAAATTACAAATAAAACATTTGA  
ATCAATGAATGTTTTTCCATCAAATATTGTTGATGAGCAAGAGAATAACTATTATGATATA  
TTTAATTCCTTCTAAGTTATCAACAAATAGCAAACAAAATTTAACAAAATATCTCAAAAT  
ATAAAGATTCATGATCAACATGGATTAAATGATTATCAATTAATAATCAAGTATTGATTCTT  
CTGGATATGGTTCTTTAAGTTCTAAAATAAGTATTGATAGTTGCAAATCAGTCCTAA  
GTGATTGTAGCACATCATCCATTAGTAAAAATATAAATATAGAAAAAGTAAAAACAAA  
GATAAAAGAACTGCACAAGCAAAAAAAGTAGTATGTTATAAGAATAATAAAGTAGCAA  
TTGCTAGAGCTAAAAAAAATTGAAACACCACCAACTCCATTACAAAATTTATCAAA  
AGAAAGAGAACAAG

>novel\_circ\_000779

GTGGGCGATAGAGACACGCTGACGTCGGTGGCCGCGAGATTGACACGACGCCATCC  
GAGCTGAGCAAATTTAACAGGCTCGGAAGCACTTTTCATTTACCCTGGCCAACAGTTGT  
GGATACCCGTGGAAGGAGAAGGTCAAACAAAAGGCGGAAGTCCGACGCACCTAGTC  
CGGATCCTTATCACGATCATGAGTCCCAGGATGACCTACCTCCAGAGGAAAAGGGTAAT  
TTTTATTTATTGAACACCGCAATAAAAGAATTTCACTCCTTAAAAGAATCGTGAAGTGA  
TTTCAAAATTGATCAATAATAGTATGTGTGAAATTTTATTCAACCTATTAATGATTAATAA  
AAAGTAAAACGATATGAGAAAAGACAGGTATATTAATGATTGATTTTTATAAGTATTA  
ATATATTCTATCGATTTTCAATGTTAATCATCAATGCTGATGACAATTAGATCAATGTTGC  
GTGAGATTAAAGATTTTTTTTTTTTAAAGTTATATTCGCAATATATAATCTTATCTTTTGCA  
AGTATAATATGTAATGCAATTTGTTTTTAATTGGTTAATGAATAAAGGATTTTAAATCGTT  
TATTAATAATTAAATTGGATAGAATTATAAATAAGACATTCGATTCCATATATTATTCCAT  
ACAGAATTATATACATCATAATGTGTAAACATTCTATTCGATTATATTCTATTCCATATTCTA  
TTACTAATTTATTTTTTATTTCATTTTGTATTTGACTTTATAATATTATATTTTTTATTCT

GTCCTGTAACGCATTTTAAATATCGTACTTTTTTTTTTCGTTTTTGAACATCTTATATTATTA  
GTTTCGATATGTAAC TAGATGAAAGCGAAAGAAAAAAATACTATATGGTTAATAAAAATT  
TGCTGTACCTGTAAAATTGGCGAAATTTGCTTTCATTTTCGATGCAAAAAC TAATATTAAG  
AGAACGTTACAGTATATGTCAGAACTGTACATTTAGTTTAGCAAGCACAGGCGCCATGT  
CTTATCTATTCGATATATGCAATATGCTAGTATGAACATTCTACGTGACACTTTGTATAATC  
AGATATTATCGAGACCCAATTCATCTTGATATTTGGCTAGGTGAGTCAATGCGACTTACC  
TGAATGCATTCAGTTTTCTATTCCATTATTCATAAAGGCATTCGCGCCAATTTTGTTCG  
ATTTACATTTGTTGTTGCATGGTGAAGCGTTTTGATATTTTATTGTGACTTGTAACAGCT  
GTTAGAAACATCGATCATGATAGATTATTATTTATATAGTGAAATAGTAATCAAATATATAA  
TAAGAGTAAAAATAGTATACCTGGTGCAAATAAATAAATAAATAAACATTTTGATGATCG  
TTGTTGAAGTTGAAAAATATATAAATACATATTGGAGAAAAAGATTCACAGTAAATTGA  
TTATTCGATGGCGCCACTTTACACTGTCATGTCAGACAGTTAATGTTTCGTAAAATCAAA  
AGAATGGACGGCTAAATATAACATCAAAAACATAAAATACGTTCTGTAAAAGAAGATAT  
ATAGTTTTAGTTGATATATATGTGTATATAAAAGAAAAAAATTGACAAATTGATTTTTAAA  
GTGTCACGTGTTCTTTGTTGTCTTTATTTCCCGCGCATTCTGTTTATTTTTCTTCATGATC  
TAATTATATCAGGTATGCCAGACATTTTAATCGATAATTAAAACTTAATCTAATTAAATTG  
TTTGTGTCTTTCTATGATTTATTGGAAAAATACATAATAATGCGTAATTCATTAAATATATT  
TAATGAATTCGACTTAACTGTGCATTTGCAAATAATAATTAATTTCAATAATTTTAAGTTA  
TTTGAAACAAAGAAAAATTATCTTATTTCTATGTATAAAATAGTTTTTGAAAAGTCAATG  
CATCTTTATTTTAATTTTTTCCATCACTGAATGTATATATCATATAATACATCAGCTGATC  
AACGTCATGATGTAACTATGAAAAGCATATGGCGTTATTATGTGCATCAAACATAACCT  
ATAATATATTGAAAAATAAATGGAAAATGAATGTTTCATTGGTTTTATTTTATATAAAATAC  
AAATATTATAATCATTATGTCATTAAAAATAAAATAGTATTTGTTATTCTTATTAAATTCA  
ATATTACTACTTAAATGTTGCATCATGTAAATTAATAATTTAAAACGCTTCGAATTAAATAT  
GATAAGACAAC TACTATATTTTTTTTACAACATTAAAATTTTTTATATTTTATATTATATGTAA  
TTTTATTTTCAATATATAATCTCTATTCTATAAAAAATATTTCAAATAATTAATATTATCAA  
AAGTCTCTATATAAGTCTGTTATATTATTCTTTATAGAACTTCTGGATAACCTAAGGCCTG  
TGTCACCCAAATCAAGCCATATGGAAAGAGTAAAAACACCTCTTGGTGTTACAAATAC  
AGTTATAGAAGAGGAAGAACAGCCGTTCAAAGAAAGATTTTAAAAATTACTGTTTCGT  
CATATCACAGATGGTCAGGTAAAGTTTATATCTCAATTTATTCATATAAAGCTTCTTTGTC  
TTTTCTTATTAGTTCTTTTATCTTATTAAATTTATTTTATTTACAGGGTGTGTTGGTGGA  
GTATTGCTAGTTACACCGAATGCGGTAATGTTTGATCCTAATGTCTCTGATCCTCTTGTA  
ATTGAACATGGAGCTGAATCTTATGGTGTTATTGCACCAATGGAATTTGTAGTGAATGCT  
GCAATTTATTACGATATCGCGCATATGCGTGTTGGACATACGGAATCTGGAAATTTAGAT  
AAGAAGCCAGAAATTTATTATATGAAGAAACCTTCACAACTGAGAATGTGAAATGTC  
AATCGCCAGAAAAGGAGGAAAATTTCCGGAATTAACAGCGGATGATGAAAATGTATG  
TAGTTATACCGAAAGAGATGGAGACGCTTTTCCAAAGGCCTTTGAGAGAGATCTCGTT  
ACTCCTACCAATCTCCAAAATGTACATTAATTTATATTTAATAAATTAAATTTTTATCAA  
AGCAATTATCCAATAATAATTCCAATTTTTTTATTAAAATCATAGGAAGAAGATACAACG  
ACAACCAAAGAAAAAGAGAAGGAGAAGGAAAAAGAGAAAGAACAGGAGAAAGAAG  
AGATTAAAGAGGTGAGCGGTGGTGGTCAAGCAAGTAGAACGTTAGAGGAACGTAGAC  
GTTCTATGCTTGACCATCATTGGCCAGTTCCTAGTAAAGATCAATATCCATGGCCAGTTG  
AAGATGAACAACAAGATTCTTTAAATTCTGACAAAGTTAGTTGTTCAATTATTAGTGGAA  
TACAATATAAAATTTTTTATCGAAGTTCAAATTTTAATAAAGATCAATATTTACAGACGGA

TTCTGCAAAATCGAAGGTGATTCCCGAAGGTGAAGAAGGATCTCTAGTCAAACGTGTCA  
TGCCACGACTCTGGTATTGACATACGTGACCCTAATCCCCCTTTCCCAGTAGTTCAGCCT  
AACCCACAAAGAAAGTATATTGACACGCAGATATTGTCTTATCTTCAGATTGGGTCCC  
TCCTATTACTATTGCTCCGACGAACGTAACAACGATTGCTAGATAGTGGTTCTGCTAT  
TAACGGCAGGAAAAAGGCGAGTTCAGTGTCTTTTAGCTTAGACAGTAATGCAGAGGA  
ACCTGAGAAGGATGAAGAACACAAAGATGACGATAAACAAGAGACTCGTAAAAATAA  
GGTAATATTAATAATTTATATACTTGATATCACATACTTGATATACATACTTGATATACATT  
ATCTAATTCTTATTTTATTTAACAATTATTATATTGATGTTAAAACGGTTATCATATCCT  
TTGTCATGGATGGAAGGATTAAGTGGCGAAAAAGAAGATGATAAATCTGGATCTGATAA  
AGTTTCGAGCCTTCCTAATAGCGCGGATTACATCATTATCAGTTTTTCAGCAAAGTTTT  
CTCAAGGTGATAATAATTATCCTTGCTCTATAAGTCCATAAAATTTTATAAAATTTTCTT  
GTATCTTATATGGTACAATAATTTGTTCAAAAATTAATCATATATGCTTTTATGTTTTACT  
TTATCATTCGTGTATGTTAGAAATGAGTAATTCAATGAAAAACAATTTTGCACTATTT  
TATATACATAAGGAAGGTTTTCAATGGTCTGGCCTCCTTTATATGATGTAAACGTTTGTTTT  
TCGTGTGATTGCTTTCTGCTGAAATTTTTTTAGAACTAAAAGTAATATTTATAGCGTACTT  
GAGGCTATTCATAATGAAACGAATTGCTTATATCACGCACACATGTAATAAAAACGTTTT  
ATAGTTCTTAGAAACGAGTTTTATTATGAATATCCTCATTTATTTAATATAGAATATTTAT  
TAGAAATTTGCGCGTAGAAGCAAGCGGCTTATTGCATTTGCGAAACGCGCTTTGGGATA  
TATCTTTTTTCAATTTCTAAATGGAGTAAAGGAATCAAAGGAATGGGCACGTGTGGCAT  
TTCCAATTACGTCCTTGCTTCAATAATCTTGATACCATCATAGTCCGTTTTTTCAATTTG  
CTTTCCCATTTTTCTTCTTTTTCAAACCTTTTTTTATTAATTAGCATTGTAGATATATTCTATA  
TCCAAAATAAATTAGTCATTCAAAGCTAGCTATATTTATCAAATCTTGATGATTAACTT  
TATAAGAGAACTTTTCATTGAAATGATATTTCAATGAATTAATTTGATTTCAGTAAGCTGTAT  
AAGTAAAGTAAATTTTGACTTCTAAAAATTTATAGGGAATACTGATTATTTTTATTACCAT  
TTTGAGACCAGTATCAATCAGACTGTGATGGTAAATCTGTGTTAAAAATAAAGTTTAAC  
TATCGTTTCCAATGTGACTAACAAAGAATATGTAATGGTGGTGGATATAAGCTCGCCGAT  
CAACCTGGTGAGTGACTTTAGCTCGGGCCTGTTTGCTAAAACCTCCAGCGAAGAGAGC  
GGTGGGGGGCGGTAGAGCTGGGGGAACACCTCCGCTTACCGCCTCCTCTCTCTCCAGG  
ACTCCAGCAATCCTCAGATTTACCTGGTCCAGGAGGGCTTATAGGGTGAGTTTAGGCC  
CAGTCATGAACCAGCAAGTTTATACTGTATCCGTGTTAATCCACTTTGTCCTCATATTTTT  
TTTCACTATTGTTCCACTCTCTTTTGCTCTTTCTCTACTTATCCATACTCTATCTCTCTTA  
TCTCTGATTGGCTGTAACTTTTATATTATTTTATTAAACATTTATCTTCTTAGATATCTA  
GTTTGTTTCTTGCTATTTTCCATAAATTACATCATCTAAAATCATTCATTCTGTAACATC  
CTTCTTATTAAGTTTTTTAATGAACATATATAAGTATAAATGTAAAATTGTTCTAGTTTTT  
TCATAAATTTCACTGTTTCGAGCTTCTCAGGAACAACACTCTTCATCTATCCTATCCTTC  
AATACGTTTTATTTATTTATTTATTTATTTTAAATCTTTCTCAAAGAGAAAGAACATTC  
TTCTCTGTTTCCCCGCTTTTCAGGTAACTTACCATCATTTTTTTTTTCAGAAAACTAC  
ACCAAGACCGAATAATGTGCTTACAAACAAACACACAATCAATCAGAAACACAGCGTT  
TTTAATATTCCCGAGCAGTCATTGAACTTTATTTACGACGCATACACGTTGGATACAAT  
TTTAACATTTATCTTGAATGTTGTTGTTTCCCTTAAGACTTAATTGCTCTTTATCACA  
ATTGTATATTGATCAGTGTATATATTGCTTCGAAATTACAGGGAACACGAAAAAATCAGA  
GAAATCTCGTGTACTCGTGATTTTGAAACGCAATTTTGAGAACATCTTTCATGCCTATTC  
TCTAACATTAACACTTTCTTTTCAGGCGGTCTCCGTGGGCACGTTTCATCAGGCAGCAAC  
CATTGACGTCGTCAGGTAGCAGCAGCGTGGACAGTAGTCGAGGTAGCAAACTTCGA



CAACGGCCCCGCGATTGGACTATCGTAGTATGGTCTCTGTCTGAAGATATGCCCCGAAGTGT  
TTTGTCTAGTTTCGACAGTAAGTGTCCAGAGGAATTGAGTCAGTCTTTCTCCCCTTGAAT  
TATGGAACGCGAATATATTTCAATCTGTATATTTTTTCGGAATGATTAAATCCAATGAAAG  
ATATCATACAATGTAACAGATTTCTCACACTTGAAATATCTTTTCAACATTTTTTATAGAG  
TGTTTCCATTTTGTGGGTGATTCTTTTCATGGAATGTTTATCCGTAGAATAGTTTATTT  
TTCTCCAAGGTGTTTAGATAATTTTTCGTTAGAAAGATCATTATGCGCGCACAAGAGCCT  
ACAATGTCAACAATGAAACCTCTACCCTTCGAAGGGATCGATAAAAAAAAAAAGAACT  
CTATGATTAATTACACGTAGCCGCGAAATACAAACAGAAAGAAACAAACAAAATGATG  
GCAAACGGAATTACATACCACGCACTGCACTCGCTCGTATGTATAGACGGCTTTTTAAA  
CGATTGTTATTTTTGCTAGTGCATTTATTATTGTCCCTTTATTGAAGAATTTTTGAGCGCC  
TTTGATTTCGATCTCGACTAATTAGACAGTTTTTTCTTTTCACACTATTTATCGCCAAAAC  
AAAGAAAAATAAAATTCAATTTAATTTAATCTAACCAAATGCGCTTACGTTACATTGTTA  
CACATTGTTTTAATTACATTACAATTCTCGTACATTGTTCTATATGGTTTTTAAATTCTACT  
CTAGTTTGTAATTTCCAGTTCTCTACATCTTGATTATTTCGGTGTGCCACTACCCGTGAA  
CATTGTTCCACGAATTCGTATCATTATGAATAAAGAATCGCGAGAGAATTTGATATCGTT  
CCAAATATTTTCTAAATGCCTGACACAAATTCGAGGAACAATAATTTCTATTCACGATC  
GTATAATTTTTGGATTCTGTCTAGTTTTTCGCTTCTCGTCACAGATTCCAACTCGAGTC  
TCTTCATTGTTAAAAATCTTTATCGTTAATTTTAAACGAAAAGAAATTTATTATGTCTTCA  
CGATTTTGAACTCTTTGTGCTATAATCCTTGAAGATTAATTACATATTACAATTCATATAT  
TATTTGTGAAGTATATATGAAGGCTTTAATTGTTAAAGAAACGTTTTAAAAAAATGAA  
AAATTGGAAAAATTGGATTCTGTAAAATCAAGGAGAAAGAGTTTCACGATCAAGTGC  
CAATGAATTCATACTAATGCAGATATATCATATGTTTTGTTGTCCCTCTAGTCCAAGCACC  
TAATTTTCCCGAACTCGAAGGCCTCGGTAGGTTCTACTGTATTAGCTTGCTTTATCCCT  
TTTGATCAATTCACCATGTGTCCAAAGAACGTTACTTTTTTTCACATTGTTAATTTACCC  
TGTATCTATTTTTTCCCCCTTTAGTTTTCTTTTTTTTTTTTTTCAAGTCTCTTGTGCAACTT  
CTTCTTCTTCTTCTTCTTCTTCTTCTTCTTATGTGTATCATCGTACAATTTTTAAATTATAT  
GTTTTTTAAAAAATCTTTTTTACTCACAACCTCCATTCGATTTTGCCCACTGCACTTGCA  
CACACGAATGCATTTTATTCTCTTTCTCTTGTGTATAATTTTTAGAAATAATTTTCGTGTA  
ATTTTTACGGCAACGATATTGTGCAATTTTTTACTCCGAATCTTGGTCACTGTACCGA  
TACAATATGGATTTTTTCATGGCTGTTTCTCACTATATTTTTGCTCATCTGTATTGTTGTGCC  
CGTGTCTCTCGTGTATTCTAATCTATAATGTTTCTAACATACGTTTGTGATGCTCATGT  
CGCGATCTCATTGTAATTGTAATTTAAAAACAATTCTTAATTTTCGATCAAGAGAAAATA  
TCGTCTGCAATAATAATTTAATGCGATGCTTTTTAATTTGTTGAAATATTTCTAGAAATG  
AGCTTTTTGCATATTGTCCCTTATTTTTTTAATTTTTTTCTTCTTCTTCTTCTTCTTCTT  
TCTCTTTCTATATCTATAAACGAAATGTATCTAAATATCTAAATATTGTGTGTCTTGTCCG  
AAGATTGATTAGAAAAATTGTAAATTTTTGATTAGAGTATCGCATAATTGAGCGAATATT  
AAATATCAAATAATAAGATTTAATTAATAAGATTTAATTAATTATTCGAGATAAGAAGA  
TCTCGTGTACGCATTAATGAATCATTCTGTTGCATTATTTAGAACTTATACCACGACCAG  
CCCATTCCTGCGAGGATCCTCCATTGTACCTGAGACTGCGAACCGGAAGACCTAAGGA  
TAAGAAAATTCCACGCTCAACGCCTATTATGAGCTACGGGAAAAAGAAATTACGGCCT  
GAATACTGGTTCAGCATACCCCGTAACAGGTAAATAAAAAACATTGTTTCTTTGTGACA  
CATTTCATTTTCTCTCCCCTTTTTGATAATTTCAATCAATATTGTAAAAATGTTGTTATTGA  
TACACAGCAGTCTCATTAGATATCAAATAAGATATTTTAAATACTCTTCTTTTGATA  
AAATATTATCAAATAATTCTATCATTAATAATTTAATAATTTTCTAGAAATTAATAATTACT

CTATTAATTCAAATTATTGTTAGAAAGACGACAGATAAAATTTAGAAAATTCATCTAATATTA  
TAATATTTTAAAACCTTTCATTGTAGTATTCTCAATTGTCTCCTCGATTTCTTTGATTTAAT  
TTTTTTCATTATTTCTGAATTATTGCAAAATCTGTGAAAGATTTTCAAGAGAAAACCTCA  
CTATCTACGAATATCATTTCCCGGATACGTGTTTCTTTACCTCTATTTATATGTGCGATTTTC  
CGCGGAATCCTAATTTAGGAACCGGAAACGGCAATGAATCAATCGTTTTTTTTACGGCTA  
ACTGATATAAAATATCCTCGTACAACGTTTCCAAGTGAGTAATTCTTGCAAGATCGTG  
GTTATTTTTGTTAAATTCACACCTCGTATCACGTTTCGCAAGACTAGACCGGCCAAAAAA  
GAGCGAAACACGTGATTCCTCTGTAAGAGCGGCAAAATAGGTCTCGAGAATCGGCATC  
GTGCTTCTTGCTATTTATACCGATTCTTTGCCTTGCGTTTTATGTTTCGTCAACTTTCAACG  
AAACACGTTCCACACACGTTTCTTCGTTCTATTTTATCGATTTCGAGATGTTTGGACAAA  
ATAAATTCGATATAAACTAATAATAATTTCCAAGATAAATGATAATGGCCGCGTTACGAC  
TTGTAATCTTTGCTCGACAATTGTCGAAGGTCATGTGTGGTGTGAAGGTATATTCTGTTC  
AGCAATCGATTTTAATACGCGGACAATAATCTATATCAATGGCAATTCCTCTTTTATCAAT  
TTTTTTATTTTCCTATCAATGTTGTAAATTCAAATTGAATTTTAATTTACATTTACTTTGTA  
AATCTAATCTATGATAATTTTATGATCTACTATTTAAATTTGTATTTGGGTCAAGTCTAAA  
AATATTAGATGTATCTTATCTTTCTTCCTCTGTGATTGATTCAAATTATTATTATTAATATTC  
AATAATTATATTTTTACTTATCCTGATAACTTGTGATTGTGATGAATTATACAAATTCATTA  
ACTTTAGAAAATTTTCTAGAAACAAATCTTGAACAAATTGAATAGAATAATTGAATCTAT  
TTCAAGTATTTAATCACAATTTTGTGATTGAAATAATTACACACTATAATGCTCCCCCT  
ACCAGCAATCAATGGGGAGAAATATCGAGTTGAATGTTACGGTAGTCAAACACGTTT  
CAACTTAACTATCCCCATTCATTATGTGAACGTCTCTCGAGTTAATCGAGCCGATCTTTA  
ATTAATATCCAAGTTGAACACGTTACACGTGAGAAGTAAGCGCGAGAAATCACGTGAC  
ATACTTGGCGTATCATCGAACGTGCCTCCATAACTTTTCCGCTCGATGCTCGTGATACTA  
GTCTGTTTCGCGCGAAGAAAACGCATCGGAGACGCGCCACGTGTCGGTTGGAAAAAAA  
AAAAAAATAATAATAATCGTTTCTTCTTCGTGAATTTTTTCTTCTTTCTTTCTTCTT  
TTATTTATTTATCAATGATACATTATCGGTTTGATCGATAATTAATTGAGGAGCTTTTTGG  
GGAAAAGGGATCATGAGAAAAATTTGAATTAAGTAAGTTTAATTTTATGTGTATATATAT  
ATATTTATATATTTTGGATATAGATTATTTTTTTTTCAGAAAGCTCCTTATTATGTGTTTTATT  
TATTGGTAAAACCTTAGGTTGAACGAGCTGAATTATTATTTTATCGAAATGTCACGTGACG  
ATTGGATTATACATTTATCGAAATTATCTGTTGTAACCTGGTGAACAGCTTCGTTGAATTTT  
TATTATATAAATTGTTTATCGCTCGACAATTTTAGATAAATGAAATCTATTGCGTGACCG  
TTTAGCATCGTTCTTAGTGTTGTCATTGGCAATTAATAAGGATAGAATATATGAGTTGA  
TTAGGAAAAAATGATATTTTGGTAAAAAAGCAACTTTGAGTTTATCGC  
ACAATAATTTATTAATTTAACTTGATAATGATAATTAATATTTTGCAATATTTTCCACAGA  
AATTGGATAATTTGCGATGAATTCCTATGTTGGCATCTTATGATCATTGGGATGGACAC  
GTGTATAATAGCTTGTTTTTAATTGACAATAATTGAATTATCATTACGTAATAAATAAAT  
ACGTTATTTTAATTCCTCCTCCAAGAGAAGAGGGATAATGAATTTCAAGATACATGTGT  
AGTATAAAGAAGTGATGAGTCTTCTCAGAATGTACATAATATAGAATTTAGATAACAAAT  
CTTTAAAAATGTAGATAATTTTTTCCAGAATTATAATTATTCTCTTGCCCAAGAACAATTA  
TACTCGTTCAAAGGTAGATTTTCAGAAATAAAAATAAGAAATCTTTGAATAGCATCATG  
AGAATCATTTTATAGAATTGTTTCATACAAAAGTTAAAAACTCTGAACGATTCTCTACAA  
TTTCAATAACCCATTTAAAAGAATATTCATTGCTTAAAATTTTAATTAAATATTCCAAAAC  
TTTAACTTTCTAAAATTTCAATAATAACATTTATTGTTATTTTCAAAGAAATTCTCAATAA  
TCCCAATCAAAGAGTTTAAGATTAATCTTTAAATTTACCACTTCCCAAACCCTTCAAATT

CAGAAGAAAAAAAAATTTGCATAGAACTTTAATCTTTACTACCTCAACGACACGAATGAT  
CGTCGACGATCTTGCAATCGCAAATCTGAAATCCGTCACACGCATATCCGATCCAGTGA  
ATACGTTACATAACAATAAAGAGTGTTGCACAGCGGGAGAAATCGGGAGAGAACGG  
TCTGTGTTGGTCATCATCACGCAGTCGGAGATTAGGTAACGCGTCGAAGAAGCGTCTA  
ACCTAAGCGATTACGTTCTCTCTTTTGCATACCGAACTGCCGTTTTAGAATAACATCGT  
GTTGCGCTGAATGGTCATTGGAATTTGGAATGTTTCTTCACTACGAAACATGTGTAC  
GGAGCAACATAGTGACGTACGAGTTGACGCGATAAGAAGAGGTGGAGGATAACGAAT  
GCGAGGTGTTGATTAGATAATTCGTTTAGATTTCGTTTCGAAAGACAGTAGAGAAGGAA  
GGCATTACGTGAGTTATAATCGGAAATGAACCGAATAATTTGTAACTCGTGCGATTCT  
CTTTTAAATAGAAGATCGAAGAAGAAATTAAGAGTTCTAAGATTTTCTTTTTTAATGGA  
ATAGTTTGTTTTTTAATTAGAAGGAGGAACGTCTGAATTTTCATAGTTTTTCGTGTAGAAT  
AAAATTTGTAAAAAGGAAGTGTTTATTTTTTTTTTTTTTTTTTGGTGAATTTGTAAAGGAA  
TAATAAGTAATAATTAATTTTGTATTGGAATAATAGTAATTTGATAATATTGTGTGGAAA  
ATATATATAAAAAGAGAACTATGAGTTTTAAATAAAATTTTCCATAATCGCTATCAAT  
TTTTTTTTTTTTTATAACAAGTACACTTTGATAATAAGCTATTTATTTTTTAATACAATGT  
TTAATTTCAAATATCTATTACTATTTTGTATTATTATTGCTATTTTTATTAGTCTTTGTC  
ATCTGTCTAAATGATTATTATTATAATAAAGTTGTTATGTGCCATTAAAAAAGAACGATA  
ACAGGTGACAATGATAGGAATTATCGTGAGGCGAACAATCGAGTCGAGTAGATAATGTA  
TTTTCGTGCTCGAAGTTAAATTTAACTAATCAAAAAAAGTTGTGTTCTATTTCGATTTT  
TATATTTTGCAAGAAATATCTTAATTTTTTATAATCTATAATATTCTATAATATTAAATATTG  
CAAACATTGACTCTCGTAAAAAAGAAAAAAGAAAAAAGAAAAAAGAAAAAAGAAAAAAG  
AAATTTACAGTAGTTTGCACAGTAGTTTACGTCATCACAGGTAATTATAATGAATATAC  
ATAATCCCCGAATGATTCACTCGTCTAATTCTTATGCAGTCTACCAACACAATTTAACA  
AGTGTCTCTCAAGGGTCCTCATCGGTTGCATCACGTTTCGTATTGTTTCGTAGCCTGTTG  
AATTTAAAATAAATTCTAAAGAATTTTTATTTCGTGATACACAAAATATTTAAAATCGTG  
CGAATAGAAATATTAACCTGTAAAGTTTAAACATCGTTTCGTAGTCAATCGACTTTGAC  
AAGTGTTCACAGGGGTCAACATCAGTTGCATCACGGACGCTTTGTATTTCGATTCTAGT  
AATAAACTACTTGATCTTAAAAATAAATTCGAAAGGAGAATAAAATTTTCAGCGTGTT  
TTCAAATTTATGTTGAAAATTCGCGTGACACGAATATTATAATAATCAGAATATAAAGT  
TTTAAACAAATTCGAGTGTGTTTCTACGGGGTCATCGTTACGTAAATCACGGACTCTTC  
TTTTTTCCGATTCTAAAATAAATTCGAAACGATAATAGTTGAGTGCTTCAAAGTAAGTG  
AAAAATATTAATCGAGGTAAACAAAGATTGCGTAATATTTTGCAAGATTCAGAAAGGGG  
AACGAAGTGTGTTAGAGAGGAAATAGGAAACGACCTTGCATGGTCGTGACGTTTGA  
AGCGCAAGTGGTATATCGGTTAGAGAAAGTCAATTCGATCTTGATAGAGGTGCACGAA  
CGTGGTGGTGAACGTGTTACGATACCTGACGAGGCGGCAAAATGAATTGGACATTGAG  
CAGTGTGCGCAACGTGATGAATTTTCGTGTACAACCAGAGTGTGACGAACGCTGTGCAG  
AACGTTATACCGTTTCGTCAATCGAAGGGTGGACGACCTCTACAGGTTTCATCCATGCGTG  
GGTGCCCTCGCTTTATGGAGAGCTCGACGAGAATTATTGGCGGGAACGTGGGTACATC  
CTGTTGGACACCGACACGGATCTGTGCCCCGAATTGTGCGGCGTGACGAGGCTGGG  
AAAGCGGGGGAAGGAGCCACGGAGGAAGGGAAATCTCGCCAAGACAGCGACGAGAT  
ATCCGAGCTGACGAGAGAATCATGGGAG

>novel\_circ\_000780

AAACATGTGCATAAAAGATCGGAGGAAAATATGAGGAGAGGTTTCGATCGAGAGTGAC

GATTCGATCATGTCCTGCTCGTCCTGGGAATTATTGGACTACGAGCCGAGCAAAATTTA  
CATCTACGAGAAGAAATATCGCGATTATGTCGTGTACTTCTCCATGACAGGCAGCTCTC  
CCTGCCCCGAACACAGAACTTCGAGCACAGCTCTCTTGGAAGCACAGGTACATTTGT  
AAGAAACATTTCGTAAGACATTTAAGTAAGAAACGAGCAATGTGAATCACGTGCGCAAT  
GATCGATGTTTTACACTCCGTGTATATATAGATTTCGAAACAGGCGTGAAATTAAGTTTAT  
TGATAACAAGCTTAAGAATTGTTGGTCGGAATAAAAAATTTGCACAGAGGATATTTT  
ATCGAATCGACGATTAATCATTTCGGAGATCAAACGAATCAATTCCTTTTTTTTTTTTTT  
TTTTTTTTTTTTTGAACCTTTTAATTTTAACCTTATAAATTAATCGATTGGAATCGAGAAT  
TTTGAATTTTTTTTTTTTTTAATAATTTCCAAAACCTTCAAAAACAAGGGATCAATCTTTAA  
TTATTTGGGGATCGAATAATTGGTTACAATTATTAATACAGTTGATCAATTTGTTTAGCTT  
AATTAATCGAATAATCTGAGTTAAAAATTAATTTGAAATAAAAATTGATTTAAATCTCCAT  
CCCTCTTCTTTTATCAGGAATTTAACTGGCTGAATCGAATACACGAATTAGTCAAAGAA  
AATTATTAAGCAATGTATTATAATATCTTGAATAATAGACTAAGAGTTAACATTCCAAATT  
CATTTTCGAATTTTCGAAGAATCATCAATCAAAATATTGATGATTACAAAATTGAAAGAG  
ACTCGTTCTCACGATAGATTATCTTCTCTTATTAAATAAATTTAATAATATCTAATCTATCT  
CGTGTGCTATCTTCAAGTTACATTTCACTGACCTTTCATCAAAAAGGTGTGCAACCATT  
CTCATGTGGATCTCCTAACAGTGAATAATGTCAAACCTAATCAATCGATTCTACAAAC  
GCATTCAACATTGATTATTAAAAATTCATTCTAATCATTCACTCCTAATCAAACGATATT  
TAATTTAAACAAAAAATTAATCATTAAATCATATCTTCATTGCAAAAAAAGAAAAACAGA  
AGATTTTTCCAAAGAACAAAATCATCAAATCTCTTCTAAATACTTGATTATAATATTAC  
AGCTAATTCCATCACGAGCAACAGCTATTTTATGCGAGCATTAAATCACCGTGAAACT  
TCCAGTCACGTACACACACACACACATACACACATACTTATCGTTGTATGTAAAT  
TCGAAGAGAACTGTCCAGCTTGATGAATTTGAAAACCTTGCGGTGATTCAAGGAACAA  
CAATACGAGTTTCGATGGTATCATCGTGTCTGCGTACTTCGAATGCGATCGTGATGGCA  
AACGACATAGGGACGGGCGCGTGATGATTATGAGGAAACGGGGGATTGCGTTTCGGGA  
ACCGTGGCTCGTTTCGATTTAGAATCTTGGAGCACGTAGGCTCGTGGAATCGAGAAGG  
AGGAAGTTGGGGGGAGACGTTTCGTTGGAAGAAAATTAATGAACCAACGAGAGATAAT  
CGGGAGAAAACGGGGAAATCATATTGATTTCGCTCCGCCTGCATTTTCGCGCCTCTTCGT  
TTCCAAGATCGGGCAGCGAGAAAAGTAAAAAAGAAAATTATAATACGCGATGATGGA  
TTTCCCAGTAATTCGCTGTCTGTGATTAGTTTGTGAATAGAAACGTACGTGCATTAATTGC  
ACGTAAATAATTGCATTTTTGTCAATACAATCCTTAGCTATCTAATAGAGATTGTAATTCG  
TGAAATAAGATTTTCTTAAATAACGTAGATTACATAATTTTATAAAAATAAAGCAAATC  
GAGTAAATTTGGATAGGAATAAATAATAGAATAAATTGAAGAAAGAGTTGTTTGTATT  
CGCAATATATAATTAATAAATTTTAACAATTCAAGCAATGTAATAATCAAGTTTGTATT  
CAGGGTTCTATATTTTTCAGATACAGATAGCGAAAGCGAGGATGGCTCGAGAACGAGG  
TTAAACTTCAACATCATCCCCTATACGGTGAGTATTTTCGTTTCTTCTTCTTCAAGA  
CGAATAGGATTGAAAGTCAAGGAGAACGAGCGTAACCCGAGCTCGGGGAATGCATAA  
ATATCTGTTATCGATTGAATCTGCTACGATGCATTTGATTCATGCGACAAGTTGAGAATA  
TCTCCTCGTTCGAATCTATTCCACACGCCGGTTATTTGCATACCGCGTTATTCAGTCATT  
CCGTTCAATCCAAATCTTAACCTTATCTAGTTATCCTTTTCTATCTACCTGAAAAAAGAA  
AAAAATATGATTTTCTTCGATCGATCGAACACTGATCAAATAAAAAAATATGATTGTT  
CGAATTATTTCTCGGAATAGATAAGTTCATTTAAATACTAAAATAATAATCAATGATAAA  
ATTTTCTGAAAGAACAAGTTTGGGATCAATTA AAAAGCGCGTTAAATTTACCTCATTT  
GTTGGA AAAAGATAATTTTAACGGTGTCACGATAAATTTCTCTTATTCATTCACGTAGCA

TTTTTCTTTCTTTTTTTTTCTTAATTGCCAAAGTTAATTACACCAAACGCTATAAAATAAA  
TTGTAATTTTGAATGGTATTCTTTTTATAATCTCCATATATATATATATATTTATAATCCAATT  
AAATTAATTCATCGCTTAGCTTGTCAATAACATTACACATTCCTTTATTATTATTGTCTTTA  
GACTTTGACTCATTGCTCTATTTATATTCAGTGCACACAATTATCGCGATATTCGTAAATC  
ATAGTGATTTGTTTACGATTAATTTTTCTTTTTCTCTTAACCTCGCAAAAGGAATTCCTA  
AGAATTAAGAAATAACAATTTATAGATCAAAGTGGAAGAAAAAAAAAAAAAAAAAAAAA  
AAAAACGGCACGATCCATCGATCAATCGATTTTATTAAACTCACGAGACTCGGTAAGTT  
GCTAGGCATGATTCATCGTCGAGTATGTA CTACTCTACCAGTCAGTGT CAGGAACTCTTATT  
CATTTTCAATTATCATAATGCTCTAGACCGTTATTGCTTGCTTATTTTCTCTTAACTTATA  
AAATGAAGTAGCATCTATATATATTTTTTTCTTTTTTTTTTTTTATCTCTAAACTTTGTACA  
AGATATTTATTTATTACAGAGATGGAACACCTCTTAATGTCTAATTCCTCGCTTATCAC  
TAATCAATCGAATTAATGAATGATACCAGATTATCTAATTGTGTAATATCCATCATGATTA  
CCAATCTTTCGTATTTATATTTTTGAAATGGAATGAAAAATCTATTTAACCTCTCTAATTG  
TATTATTCTTTTTTTTTTTTTATTTTCATTATCATCGATTTCAATGTTTATATTCGTTTATATTATA  
TTTATTCAATCGTTTAAATATATTTTCGTATCTCGTTCACTTTAAATCATTTTATTACACGTC  
GAGAGAGCGAACTGAAAAAATTTCTTTCAATCTTCTAATTTTTCCTAACTTTTCGCATA  
TATCGAAATCCATTTGTGGCACAAGGAACCATCGAAGAAAAAAATTAACGATAAG  
TTTCGTGAAAAATATAAATTGTATCATCCAGTTTATCGTGGCACCGCGAAGAATTAATAC  
GAACCAATAATACTTTATTAACGGACGTGCCGTGTCACGTCAGAGGTGACATTGTCACG  
TATAGGATCTGTGATAATATTTCTTCTTCTTTTTTTTTTTTTTACGTCACACATGCGATCC  
TGAACAGGAAGGATCATCATACTGTAAAAGCAACTACGACTTTTATAAGAATTAATAATC  
GTGAAATATAAAATTTTAGAAAAAGCGAAAAAAATTAATAATAATTGACCAGTTAT  
ATAATTTGTAATAACGATCCGTCTTATCCTATATCTCGCATATGCCATAATTAAGAGTTAT  
ATATTTACGTTTTTCAGAAAAAAATAAGCGAATAATAATTAACGATCGTTGGGGGGAA  
AAAAAAAAGGAAATATTTAAAAAAGGAAAAGTCGGTGGAATAATTAATTGCGGAAGTT  
CTCACTATCTGTTTGGCGCGAATATTTATGGTGAAACGAGCTACGGGTTTAAATGCAT  
GTGTACATACACACATACATATATACATATATATTACACAAAATTACCCAAGCACCTTGGC  
GTCTGGTGGTTGCGCAACGCCACGCTTGTGCTTTCTTGAGCGCATACGTCTCTTTCGCA  
AATGGACGCTCACTTTCTCGACGGGCCGGCGTACATACACGCAGTAATCGATACAATA  
TTTCACGAGGAGAAAGAGGCAATGCGAAGTAATCTGTGAAGCTTCTTATGAAAGTCGC  
CGACCTCTGACGAAAGAATTGGACGTTAGATCAAACGATCGTACTTTTCGTCGCTTCGA  
AGATGCATTCAACACCTCGTAGCAATTGAGTTGTTATTATTAAAGCTCCAACCATCCACT  
CTTGATGAGTTCTTTTTTTTTTATTATTGATCACTTTAATTATCCATCGAAGATAATTGATC  
TTTCTCGATACGGTTAAAGTTTCATTGATTGTTAGATGGATTTTGATATCGAACGATATCA  
TCTTTTTTTTTTTGAGTAAATTAAATTGTTTTTCTAAAGTGAGTTCGTCTACGTTTATCCA  
ATCTTTGGGAGATAAAGATGCGTGCGATCTCGAAGATTGCATTACATTGTGGGAGACAG  
AATATTATTTACAATTATTTTTTAAAGCCTACGTTACGCGGCTCGAACAAATCGATAATC  
GATTCGTTGTAACGAAGAAAAATTACGAAATCATTGTACATTTAACTCGATTGCTTTAC  
ACATTTTCTTTCGTTACAGAGATACTTAAGAAACGTGGGTATTTAGGAATAATTTGAC  
ACATCGTAATTAGCACTTCTCTCACAATATATTTTCGAGTCAAACCTCTTCAATAATTATCA  
CTTAATAACTCGAAATCCGAAATATATTTTCGTAATCTTCGTTGCGAATATATTTTTGTGTA  
TTTTTGTAACCTATGAAAGAAACAAATGCCACGTTGTTACAACGCGAGATCGTGATTC  
CACGTA CTACGTGGATCCTTTCAAACA ACTCTCCGGAGAAATTTCTCGAGCAAATATAC  
TTTTCGTCCTCCCCCTCCCCCGCGTCTGAATATTTTTAAGCCGCAGCCGAGAGGCCAAA

GAGGCAGGAACCGGAAACCGCGCTCCAGCGACTAGAAAATCAACTACCATTTTGTCC  
AACAAGCAATAGATTTCGATTCATGAATCGTTGCAATTATCGATCTCGATTTTAATCCGAG  
TCTCGATTATTTACACGATGAGAAGAGAATAATTTTCCAATATAAATATTCAATTCCAG  
ACGCTTGCAAAGTATTTACAGTTTTAAATTTACATTATCACGATTTTAAATCTCTTTTGA  
GTAAGGGGAGGGGGTGTCTCATTCAAATTAATAAATTCCATTCAAATTAATAAAT  
CCATCGGCATCCGGTGAAAGAGCAACTTTCATTTCGCTTAGTATACACAACACAGCGC  
GAATGGCGAGGCAATGATCGCTTCTCGGTATAGTTTCCCTTCTGTCGCCGATTATCCTAT  
ATACAGAAGGTAGAGGTCTCGATCCACATAGATCTTTCGTCGATCTTCTTCGAGGGA  
AAAAAAAAAACTCCTCTAGATTTCTACCAATCTGTCAACGATTCGTTGCGCGGTCACTGC  
TCTATTCTCCAACCTCTGTCCTCCACTCGCGTATTATTACCCTCCTCTCTCTGGAAAAAAG  
AGAAAACGAACGATGCATATGCTGTGATCAAAAATTTGGAATTATCTTATCTATTTATAT  
ATATCTTTTCCTTCTTCTATTAATATTTTATAACGAATAATCTTTAACGATTAAAAATAAAA  
TTTAAAAATCTTCTTTTAAATACTCGCGTATTCTTCTCTCTGGAAAAAAGAGAAAAACGA  
TGCATATGCTGTGATCAAAAATTTGGAATTATTTTATCTATTTATATATGTTTCTTTTCCA  
ATTAATATTTTATAACGAGTAATCTTTTACGATTAAAAATAAAATTTAAAAAACTTCTTTT  
AAATACTCATGTATTCTTCTCTCTGGAAAAAGGAGAAAAACGATGCATATGCTGTGATC  
AAAAATTTGGAATTATCTTATCTATTTATATATATTTCTTTTCCAATTAATTCTTTATAACGA  
ATAATCTTTTATGATTAAAAGTAAAAATCTTCTTTTAAATATGATCGAAACGATAATATGA  
AAAATGAAAAAGTCTTTATAACGAATAATCTTTTACGATTAAAAATAAAATTTAAAAATC  
TCCTTTTAAATGTGATCGAAACGATAATATGAAAAATGAAGAAGTCAATGAACAAAGTT  
AGACCGTTTATGATTAAACAAGATTTCTTCCAAGAGTCTCTCTCCGTTCTTTCTGTGATACG  
AAACGTCTGAATTACCGTTTCGTGCGAAATCTTCCAAGGTATCAATTTAATATCGACTGTG  
CGGGTCTGGACGCTAGCGTGGTTACATAAACACGTAGATACTTGGAGCCGGAGTGGCT  
CGAACCGTTATAGAAAGTTCGACCGAGCTCTCTCGCGAGTTCGATCCCCCGGATCTCTC  
TCCATTATCCAACGACCATGATTGCCCTATAATCCGCGCATCCTGCATCTTCCTCCACCC  
GTTCCAACCGATTAGAACAGCTCTCTGCCCTTACGCATCGATTAATGCCCGCGATGTTTT  
ATCCGTCGTTTGGGACGCGTGTCTTAAGGATTGATCGCGTGAATTTTCGATGGAATATGC  
GAATGGAAAATGTGATCGAATTGGAGGGAATAACTTTTTGTTTCTGTATGATCGAGTTAT  
TAAAAATTCAAGTTCCAATTGCAGGGATTCATCGACGGTGTATTCGTATTTTGTGATA  
TGTCGAACACTACTGATGAATGATATAAATATGCTGATAATGGTGGATATACTGTTTCATCC  
AGTTCCTGATCTTGGATAAAATAAATTTCTTAGTAAAAGTGTAATTAACGAAGATGGAA  
GAAGTCAAAATCTAATATTATTTCAATTCGAGGAAATGCTATGTCAGGAGAACCTAATATT  
AAAGGAATTAATTAATTTTCAAATCCTCCAATTAAGAATGGTATTACTATAAAAAAAATT  
ATTAAAAATGTCTAGTTACAATTGTATTGTAAATTTGATCATTATTAATTCATGATCCTGG  
GGATCTTAATTCTATATGAATAATTAGTTTTATTGAGGAAGCAAGTATTCCAGACCATAA  
GGCTAGAATAATATACAAAATTCCAATGTTTTTATAATTGGTTGATATAAATCACTTTTTA  
TTTTTAATTTTGAAGATTAATAGTTTTTGTAACTTAAATCTTTTAAATTTATGAAATTT  
AAATTGTAATAAAATTTAAGATTTAAATTAATTATTATTTTATTTAATTTAAATTTTAATT  
AAATAAATTATTTAGTGTTAAGAGTGTATATAAACTTAGGAGAGTTTCTGAGAAATTCG  
CAATATCGAAATTCTGATAAAGGCGGAAATTTATTTCTTCGAAACAAGTCTTCCCTAA  
GATCTTTACACGGTGAACAGTTTGCAGATCGTTTTTTCGCCGTGTCTTCCAATTAAGAA  
GACCACCTTTGACCATCAATCCCTCGGAATATATATTTTCCAACGCCGTCTCGAGCGAT  
TCAGTTATTCAGAGAGGAGCGTGGTTTAAAAAGGCCGCTCGTTTCAAGCATCCCCGAC  
TACGAAATTTTCTGAAAGGGCGCGCCTTTGAGGAAGCTCGAAAAGACGATTTCGCTT

TTCGTCGCGAATCCTCTCGCTATCTTCTTTTTTTTTTCTTTCCTTCCCTGCGCTGGAA  
ATATTCGAGAACCGAGTTAACGAGTGACTCGGCGTGATGACTCGGCGAAGAATTCGAG  
GGGAAAAGCGATTTTTGACGGAAAGCGGACTTTGAGAAGAGCCGTGTAAAAGTCGAG  
GCGAAACGATATCGGAAAGAAGCAAAAGCGCAGAGTTTTTCATTTGAAAAGGTCCTCC  
GGAAACCTCGAAGGATTTGTTACGCTCGAACAACTCGAAGAACTCTGGTTGATG  
GAAAAATCTGACCTTTCGTCGATGTAGACATTTATATATATAGGATATTCTTTCTAAATTA  
AAATTGTTGATACCTTCCCCTTTCCACAATCATTCCAGTTGTATTATCAATCTAGTTCAAC  
GTAAAATCTATCTAAAAAACTTATGAAATATTTAGAAAATCAATATCATACCAGTTAT  
TTTATTATCATTATATCAAATTCGTATCATCTCGGTTAAAGATCCCTTGAATTTACGAAAC  
GTTTTCTTCAGATTTCGACAGGAATTA AAAAGATCCAGACAGATTACGATCAAAGACGA  
TTCTATCCTTTCTTGATACGACGACGTTTCGCCAACTCGGTTGGCCAAGAGCCAGGTGAA  
TAAAATTCGTTTGCCATCGAAAGGTTTCGGCTGATTAATTAATTGATCGATCGATAAGGGA  
TGAAAGTTGTGCGCAAGCAAAGCCTTCCCCTTGTCGAGGATGCAGGGATGATTAAATTC  
CATCCTCGCCTCGTTACCCTCGTCACGTCTTATCGCCGGATAACTCCGGATCCAAAGGT  
TCGCCCCGGCGCGAGAGATAAGGGGGATAATTGCGAGGGGGTGGGGGGTGAGTGTTGC  
AGCTAGGTATTGAGATGTGAGGCGCGGAAGAGTTATTATCGGATAACCGCGAAAACG  
CGACGACCCTGAATAAAAAAAGTTCTTCTCTCTCTCTTCCACCCCTCGAAGGGGGTG  
GAGGAGGAGGAAGGGTGAGGACGAGGGTAACCGTGGAGAAAGAGGGGAGGAAGAA  
AGAATCGGGACAACGGGTGCTTTCTTGCGCGATCTTTTGTGAATGGGATCGAGGCTCT  
CCCTCTCGAAGCCCAAGCACCTCTAAAGAGGTGCTCATTCTCGAAACGAATCTCTTGTT  
AAATTTGGAGATGAAATGGTGGTGATTGGAATCGGTTCCCTTATTAAATTTGTATCTTT  
GTCGTCTCTTACAAAGCCATTTTATTTATGGATTCAGGAGAAATGATCTTGGTATGTTG  
TAAGAAATTA AAAAGAAATATATGTTTTATTTAATAATAAATTCCTTATTGGGATTAAC  
GTTTTTCGATTTCGGTGAAGTCTGATCTTTTAAATTTATTCGAGTGAGGCAATATTTT  
GTCGTGTACAAAAGCTACAAGTTGATACGAAGAAGGAACGTTTTAAAAAGCGTTTCAT  
TATTATTATTATCCCTGACAGAAATAATGTTGTTTTTACGATATAAATCTTAAAAGTCGT  
AAAAAAATACATTAACCTTGGGTAAACAAAGTCAATTA AAAATAATGAATGAAAGTCCAG  
AGTGGAGAGGTGAATTACGAAGGTGAATTCTCCTCGGATAATAAATATTGTTATTTTGT  
TCAAAATGATGTTTCATTTTGAGAGCCGCTGCGAAGCTAAAGACGCAGAACTGAGAC  
AATGCCGTGTCACCCTTCTCGCTCTGTACCGTTTTACAAAACATCATCCCTCTTCTTTCC  
TTGCCCCCACCTTTCTTTCTTTTTCTTCGGCTTAAAAGCTTCATCACCCCGATCCGTGCT  
TTTTTTTTTGTCTTCCTCGGTCGATCCTACTTCTCAAGTTGGACCGCTTTTCTTCTGGA  
TGATCTTTCTTAGAGGACCTCTATGACTATTACTTCTTCTACTCGTTTCTTTTATTCTTA  
CCTATAATGGAATGCAGAAAACAAAGGATTCCATTAATCTCTTTGGTGAAGAAAAAAA  
ATTACCAAATGGAACATACTACTCAGTCTTTAAATTTAAAGAAAAAAGTATAATAAATT  
AAAAATTATCTTCAATCAAATATAGAGTAGACTTTTTGTAATTGTGAGCTTATTTAACGT  
CGCTTCCAAATTTAAGACAATTA AAAATCTTTTTTACATTCTCTCTATTTTATTCAATTTAT  
ATTCTTCTTTTTGATTTCAATTCTTCACTACGAAAACCTCGCTACAGCAGCGTCAATTGT  
CACACGCGGAAGTAGATCGAGTCGTGTTATAATCAGACGTTTCGTCTGTTTCATCGTCGAT  
TGAAACGCCTGTCACGTCTAAATTCTACCACGCAGTAGATCGCGTGTGCGGTCACCCAT  
TTGCTATGCTGATTCTCTCACTTGTGCTATCAACGCGATGCTCAACCGTAAACTTGTTAT  
TAACATCCGAAGCCTGATGCTCGTTGATTAAACATTTGTCCAACCGACAAACATATCGT  
TAGAAAATCGTGGA AAATCGATGTCTGTTCAATGATGCGGCGTCATTCAATTGAACACGA  
ATTTATACAGAGAGTAACTGGTCTCTCTTTCAATTTCAATTTTCTGTCACTCGATATCTCT

CCTTGACGCCATTTTCCTTGCCGGATTATGCAAATGTCCTAATGGTCCTTTTGGTTATCG  
CGTGAATGTACTTATAAAAGGAGATATTTTAACCTGAGACGAATTTTAATGTGTAAATTA  
TAATCCGTTCAAATCAATGAAAAGAAAAAATAAGAACAATCCTTTCAGGATTAAA  
TTTTTACTTCTTCACTTTGCTTGTATATAAAATGATTAATAATTGCAAATATTTTTGTTTG  
TGAAACGTGATACCTTAAAAATTAAGATCGGTAAAAAAGATTAAAGGATTAAATTTTT  
AATAAAAGAATTGTTTCATTTTAATGAAAAAAGTGATTGTATTTTCCTAGTAGAC  
AAAGAAAGAACTTGACGGGATTAAATTGAAACGAAAGCGTGAATTCATTTTCTACAC  
GTTTCATCTTGGTTTGCGGCAACCGAGGAGGGAAAGAAGAAATGAAGATGAAACGAAA  
CGTTTCTTAAACGTAGCTGAAACGTAGGGAGGACAAGTAACGTTTCAGAGAACGTTGT  
ACCGTAACGTCGTTGCAGGGAACCTTGCAAGACGATACACCGGTGCCACTGCACAGG  
CATTACAGCGAACCGTTACACGAACATTGTGGGTATTGTGTTTCAGGAACTGCTGTGCA  
CGTTATAACGTTATAACGTTTCAAAATGTATCGTGACGTTGGATGTTGCATAAACGTTGC  
TCTACGATATTTTATAATGCTTGGAAACATTTCAAAATGACAAATGTTTCTTATCTTGGT  
GAAACTATTTCCATTTCTTATCCTATCTCCAACCTCATTGTCTCGAATCTAGTATAGTAGA  
AACTCACTAGGGCTATCTATCTGTATCGTCTAGTGACAATCTACAAGTTTAACGGAGTA  
GTAAACAAGGTAATTAAGATAGATTGAGTTAGATAATTTATTTTAGATATGTTCTTCTAGA  
TATAATAGAGAACAAATTATATTTTGTATTTATTAAAAAAAGTTTACAAAGTCGAATTTAA  
TCCATATTTTCACGTGTAATTAATTTCTTAACGAATCAAACGATAATCGAGTAAATACG  
TTATTTTCGAGATGAAGTTGTTACTCGCGAAATAATTCGATGGAGGAGATATGATCGTCA  
GACGTTTCGCAAATTGAAGGATACGTTTTATGACGTTGCGTCAGCACTGGTCCATGAAAT  
TGCGTTTCACCGATATTCGCCTGGGTTTCTAAACCGCCTGGTCTGTGGTGGCGCGTCAA  
CGACGCGTCCAGATGTAGGATCGCCATCGATGCATGCTACTTCTCGCGATCGATAATCTA  
CCTGATTGGCTTTTCGAGCCATTCTCACATCGATTCAACCGCATCACGCACATATATTTCC  
ACGCAATCACCAACTGTAGCGATTTGCATTTAACTAACGCGGTCATCGATGTGAAAATC  
TCTGAATTCCCAATCCATCTGCAAATTTTGCATTATCGATCGCATTATCGTTTTTCAAAA  
ATAATTTTAAATCTTAATTAATTCGGTCAACGAAGATCGAACAGTTTTCTATCCGCGTT  
TCTAAGTGAAATCTAATCTCTCGAGTGAAGTTTCATGCGATACAATAGGCATTATCTTTC  
CCCATACCGTTAATCTATTTTGTCAAGTGATGCGAAACAACTATCAAAACGACCCC  
GCCACACTCGTGGAACAATATGTTTCGTTTCCTTACAAGACTTGTGTCTGTGATCAAT  
TAATCTTCTTGTCTTGTGTTGGCTCAGGTGGGCGATAGAGACACGCTGACGTCGGTGGC  
CGCGAGATTCGACACGACGCCATCCGAGCTGAGCAAATTTAACAGGCTCGGAAGCACT  
TTCATTTACCCTGGCCAACAGTTGTGGATACCCGTGGAAGGAGAAGGTCAAACAAAAG  
GCGGAAC TGCCGACGCACCTAGTCCGGATCCTTATCACGATCATGAGTCCCAGGATGA  
CCTACCTCCAGAGGAAAAGGGTAATTTTTTATTATTGAACACCGCAATAAAAGAATTTT  
ACTCCTTAAAAGAATCGTGAAGTGATTTCAAAATTGATCAATAATAGTATGTGTGAAAT  
TTTATTCAACCTATTAATGATTAATAAAAAGTAAAACGATATGAGAAAAGACAGGTATAT  
TAAAATGATTGATTTTTATAAGTATTAATATATTCTATCGATTTTCAATGTTAATCATCAAT  
GCTGATGACAATTAGATCAATGTTGCGTGAGATTAAAGATTTTTTTTTTTTTTAAGTTATAT  
TCGCAATATATAATCTTATCTTTTGCAAGTATAATATGTAATGCAATTTGTTTTTAATTGGT  
TAATGAATAAAGGATTTTAAATCGTTTATTAATAATTAAATTGGATAGAATTATAAATAAG  
ACATTCGATTCCATATATTATTTCCATACAGAATTATATACATCATAATGTGTAAACATTCT  
ATTCGATTATATTCTATTCCATATTCTATTACTAATTTATTTTTTATTTTCATTTTGTATTTGAC  
TTTATAATATTATATTATTTTATTTCTGTCTGTAAACGCATTTTAATATCGTACTTTTTTTT  
TTCGTTTTTGAACATCTTATATTATTAGTTCGATATGTAAGTAGATGAAAGCGAAAGAAA



AAAAATACTATATGGTTAATAAAAATTTGCTGTACCTGTAAAATTGGCGAAATTTGCTTTC  
ATTTTCGATGCAAAAATAATTAAGAGAACGTTACAGTATATGTCAGAACTGTACATTT  
AGTTTAGCAAGCACAGGCGCCATGTCTTATCTATTCGATATATGCAATATGCTAGTATGA  
ACATTCTACGTGACACTTTGTATAATCAGATATTATCGAGACCCAATTCATCTTGATATTT  
GGCTAGGTGAGTCAATGCGACTTACCTGAATGCATTCAGTTTTCTATTCCATTATTCATA  
AAGGCATTCGCGCCAATTTTGTTCGATTTACATTTGTTGTTGCATGGTGAAGCGTTTT  
GATATTTTATTGTGACTTGTAACAGCTGTTAGAAACATCGATCATGATAGATTATTATTTA  
TATAGTGAAATAGTAATCAAATATATAATAAGAGTAAAAATAGTATACCTGGTGCAAATA  
AATAAATAATAAACATTTTGATGATCGTTGTTGAAGTTGAAAAATATATAAATACATATT  
GGAGAAAAAGATTCACAGTAAATTGATTATTCGATGGCGCCACTTTACACTGTCATGTC  
AGACAGTTAATGTTTCGTAAAATCAAAAGAATGGACGGCTAAATATAACATCAAAAACAT  
AAAATACGTTCTGTAAAAGAAGATATATAGTTTTAGTTGATATATATGTGTATATAAAAGA  
AAAAAATTGACAAATTGATTTTTAAAGTGTACGTTCTTTGTTGTCTTTATTTCCCGC  
GCATTCTGTTTATTTTCTTCATGATCTAATTATATCAGGTATGCCAGACATTTTAATCGAT  
AATTAAACTTAATCTAATTAAATTGTTTGTGTCTTTCTATGATTTATTGGAAAAATACAT  
AATAATGCGTAATTCATTAAATATATTAAATGAATTCGACTTAACTGTGCATTTGCAAATA  
ATAATTAATTTCAATAATTTTAAGTTATTTGAAACAAAGAAAAATTATCTTATTTCTATGT  
ATAAAATAGTTTTTGAAAAGTCAATGCATCTTTATTTTAATTTTTTTCCATCACTGAATGT  
ATATATCATATAATACATCAGCTGATCAACGTCATGATGTAAACTATGAAAAGCATATGGC  
GTTATTATGTGCATCAACATAACCTATAATATATTGAAAAATAAATGGAAAATGAATGT  
TCATTGGTTTTATTTTATATAAAATACAAATATTATAATCATTATGTCATTAAAAATAAAAA  
TAGTATTTGTTATTCTTATTAAATTCAATATTACTACTTAAATGTTGCATCATGTAAATTAA  
AATTTAAACGCTTCGAATTAAATATGATAAGACAACACTACTATTTTTTTTACAACATTA  
AAATTTTTTATATTTTATATTATATGTAATTTTATTTTCAATATATAATCTCTATTCTATAAAA  
AATATTTCAAATAATTAATATTATCAAAAGTCTCTATATAAGTCTGTTATATTATTCTTTAT  
AGAACTTCTGGATAACCTAAGGCCTGTGTCACCCAAATCAAGCCATATGGAAAGAGTA  
AAAACACCTCTTGGTGTTACAAATACAGTTATAGAAGAGGAAGAACAGCCGTTCAAAG  
AAAGATTTTTTAAAAATTACTGTTTCGTCATATCACAGATGGTCAGGTAAAGTTTATATCTC  
AATTTATTCATATAAAGCTTCTTTGTCTTTTCTTATTAGTTCTTTTATCTTATTAAAATTATT  
TTTATTTACAGGGTGTTGTTGGTGGAGTATTGCTAGTTACACCGAATGCGGTAATGTTTG  
ATCCTAATGTCTCTGATCCTCTTGTAATTGAACATGGAGCTGAATCTTATGGTGTTATTG  
CACCAATGGAATTTGTAGTGAATGCTGCAATTTATTACGATATCGCGCATATGCGTGTTG  
GACATACGGAATCTGGAAATTTAGATAAGAAGCCAGAAATTTATTATATGAAGAAACCT  
TCACAACTGAGAATGTGAAATGTCAATCGCCAGAAAAGGAGGAAAATTTCCGGAAT  
TAACAGCGGATGATGAAAATGTATGTAGTTATACCGAAAGAGATGGAGACGCTTTTCCA  
AAGGCCTTTGAGAGAGATCTCGTTACTCCTACCAATCTCCAAAATGTACATTAATATTTA  
TATTTAATAAATTAAATTTTTATCAAAGCAATTATCCAATAATAATTCCAATTTTTTTATTA  
AAATCATAGGAAGAAGATACAACGACAACCAAGAAAAAGAGAAGGAGAAGGAAAA  
AGAGAAAGAACAGGAGAAAGAAGAGATTAAAGAGGTGAGCGGTGGTGGTCAAGCAA  
GTAGAACGTTAGAGGAACGTAGACGTTCTATGCTTGACCATCATTGGCCAGTTCCCTAGT  
AAAGATCAATATCCATGGCCAGTTGAAGATGAACAACAAGATTCTTTAAATTCTGACAA  
AGTTAGTTGTTTATTATTAGTGGAATACAATATAAAATTTTTTATCGAAGTTCAAATTTTA  
ATAAAGATCAATATTTACAGACGGATTCTGCAAAATCGAAGGTGATTCCCGAAGGTGAA  
GAAGGATCTCTAGTCAAACGTGCATGCCACGACTCTGGTATTGACATACGTGACCCTAA

TCCCCCTTTCCAGTAGTTCAGCCTAACCCACAAAGAAAGTATATTCAGACGCAGATA  
TTGTCTTATCTTCAGATTGGGTCCCTCCTATTACTATTGCTCCGACGAACGTAACAACTG  
ATTCGCTAGATAGTGGTTCTGCTATTAACGGCAGGAAAAAGGCGAGTTCAGTGTCTTTT  
AGCTTAGACAGTAATGCAGAGGAACCTGAGAAGGATGAAGAACACAAAGATGACGAT  
AAACAAGAGACTCGTAAAAATAAGGTAATATTAATAATTTATATACTTGATATCACATACT  
TGATATACATACTTGATATACATTTAATCTAATTCTTATTTTATTTAACAATTATTATATTCA  
GATGTTAAAACGGTTATCATATCCTTTGTTCATGGATGGAAGGATTAAGTGGCGAAAAAG  
AAGATGATAAATCTGGATCTGATAAAGTTTCGAGCCTTCCTAATAGCGCGGATTCACAT  
CATTCATCAGTTTTTCAGCAAAGTTTTCTCAAGGTGATAATAATTATCCTTGTCTATAAGT  
CCATAAAATTTTATAAAAATTTTCTTGTATCTTATATGGTACAATAATTTTGTTCAAAAA  
TTAATCATATATGCTTTTATGTTTTACTTTATCATTCGTGTATGTTAGAAATGAGTAATTCA  
ATGAAAAACAATTTTGCATACTTTTTATATACATAAGGAAGGTTTTCAATGGTCTGGCC  
TCCTTTATATGATGTAACGTTTGTTCGTGTGATTGCTTTCTGCTGAAATTTTTTTTAGA  
ACTAAAAGTAATATTTATAGCGTACTTGAGGCTATTCATAATGAAACGAATTGCTTATATC  
ACGCACACATGTAATAAAAACGTTTTATAGTTCTTAGAAACGAGTTTTATTATGAATATC  
CTCATTTATTTAATATAGAATATTTATTAGAAATTTGCGCGTAGAAGCAAGCGGCTTATT  
GCATTTGCGAAACGCGCTTTGGGATATATCTTTTTTCAATTTCTAAATGGAGTAAAGGAA  
TCAAAGGAATGGGCACGTGTGGCATTCCAATTACGTCCTTGTCTTCAATAATCTTGTA  
CCATCATAGTCCGTTTTTTCAATTTTGCTTTCCCATTTTTCTTCTTTTTCAAACTTTTTTTA  
TTAATTAGCATTGTAGATATATTCTATATCCAAAATAAATTAGTCATTCAAAGCTAGCTATA  
TTTATCAAATCTTGATGATTAACTTTATAAGAGAACTTTCATTGAAATGATATTTCAAT  
GAATTAATTTGATTGAGTAAGCTGTATAAGTAAAGTAAATTTTGAATTCTAAAAATTTAT  
AGGGAATACTGATTATTTTTATTACCATTTTGAGACCAGTATCAATCAGACTGTGATGGT  
AAATCTGTGTTAAAAATAAAGTTTAACTATCGTTTCCAATGTGACTAACAAAGAATATGT  
AATGGTGGTGGATATAAGCTCGCCGATCAACCTGGTGAGTGACTTTAGCTCGGGCCTGT  
TTGCTAAAACCTCCAGCGAAGAGAGCGGTGGGGGCGGTAGAGCTGGGGGAACACCTC  
CGCTTACCGCCTCCTCTCTCTCCCAGGACTCCAGCAATCCTCAGATTTACCTGGTCCA  
GGAGGGCTTATAGGGTGAGTTTAGGCCAGTCATGAACCAGCAAGTTTATACTGTATCC  
GTGTTAATCCACTTTGTCCTCATATTTTTTTTCACTATTGTTCCACTCTCTTTTGCTCTTTC  
TCTACTTATCCATACTCTATCTCTTCTTATCTCTGATTGGCTGTTAACTTTTATATTATTTT  
ATTAAACATTTATCTTCTTAGATATCTAGTTTGTTTCTTGCTATTTTCCCATAAATTACATC  
ATCTAAAATCATTCATTCTGTAACATCCTTTCTTATTAAGTTTTTTAATGAACATATATAAG  
TATAAATGTAAAATTGTTCTAGTTTTTTCATAAATTTCACTGTTTCGAGCTTCTCAGGAA  
CAACACTCTTCATCTATCCTATCCTTCAATACGTTTTATTTATTTATTTATTTATTTT  
ATCTTTCTCAAAGAGAAAGAACATTCTTCCCTCTGTTTCCCCGCTTTTCAGGTAACTTA  
CCATCATTTTTTTTTTCAGAAAACTACACCAAGACCGAATAATGTGCTTACAAACAAAC  
ACACAATCAATCAGAAACACAGCGTTTTTAATATTCCCAGCAGTCATTGAACTTTATT  
TCACGACGCATACACGTTGGATACAATTTTAACATTTATCTTGAATGTTGTTGTTGTTTC  
CCTTAAGACTTAATTGCTCTTTATCACAATTGTATATTGATCAGTGTATATATTGCTTCGA  
AATTACAGGGAACACGAAAAAATCAGAGAAATCTCGTGTACTCGTGATTTTGAAACGC  
AATTTTGAGAACATCTTTTCATGCCTATTCTCTAACATTAACACTTTCTTTTCAGGCGGTCT  
TCCGTGGGCACGTTTCATCAGGCAGCAACCATTGACGTCGTCAGGTAGCAGCAGCGTGG  
ACAGTAGTCGAGGTAGCAAACTTCGACAACGGCCCCGCGATTGGACTATCGTAGTAT  
GGTCTCTGTCGAAGATATGCCCGAACTGTTTGTCAGTTTCGACAGTAAGTGTCCAGAG

GAATTGAGTCAGTCTTTCTCCCCTTGAATTATGGAACGCGAATATATTTCAATCTGTATAT  
TTTTTCGGAATGATTAAATCCAATGAAAGATATCATACAATGTAACAGATTTCTCACACT  
TGAAATATCTTTTCAACATTTTTTATAGAGTGTTCATTTTGTGGGTGATTCTTTTTCA  
TGGAATGTTTATCCGTAGAATAGTTTATTTTTCTCCAAGGTGTTTAGATAATTTTTCGTTA  
GAAAGATCATTATGCGCGCACAAAGAGCCTACAATGTCAACAATGAAACCTCTACCCTTC  
GAAGGGATCGATAAAAAAAAAAAGAACTCTATGATTAATTACACGTAGCCGCGAAATA  
CAAACAGAAAGAAACAAACAAAATGATGGCAAACGGAATTACATACCACGCACTGCA  
CTCGCTCGTATGTATAGACGGCTTTTTAAACGATTGTTATTTTTGCTAGTGCATTTATTAT  
TGTCCTTTTATTGAAGAATTTTTGAGCGCCTTTGGATTTCGATCTCGACTAATTAGACAGT  
TTTTCTTTTACACTATTTATCGCCAAAACAAAGAAAAATAAAATTCAATTTAATTTAAT  
CTAACCAAATGCGCTTACGTTACATTGTTACACATTGTTTTAATTACATTACAATTCTCGT  
ACATTGTTCTATATGGTTTTTAAATTCTACTCTAGTTTGTAATTTCCAGTTCTCTACATCTT  
GTATTATTCGGTGTGCCACTACCCGTGAACATTGTTCCACGAATTCGTATCATTATGAAT  
AAAGAATCGCGAGAGAATTTGATATCGTTCCAAATATTTTCTAAATGCCTGACACAAAT  
TCGAGGAACAATAATTTTCTATTCACGATCGTATAATTTTTGGATTCTGTCATAGTTTTCG  
CTTCTCGTCACAGATTCCAAACCTCGAGTCTCTTCATTGTTAAAAATCTTTATCGTTAATT  
TTAAACGAAAAGAAATTTATTATGTCTTCACGATTTTGAAACTCTTTGTGCTATAATCCT  
TGAAGATTAATTACATATTACAATTCATATATTATTTGTGAACATATATGAAGGCTTTAAT  
TGTTAAAGAAACGTTTTAAAAAAAATGAAAAATTGGAAAAATTGGATTTCTGTAAAT  
CAAGGAGAAAGAGTTTCACGATCAAGTGCCAATGAATTCATACTAATGCAGATATATCA  
TATGTTTTGTGTCCCTCTAGTCCAAGCACCTAATTTCCCGAACTCGAAGGCCTCGGT  
AGGTTCACTGTATTAGCTTGCTTTATCCCTTTTGTATCAATTCACCATGTGTCCAAAG  
AACGTTACTTTTTTACATTGTTAATTTACCTGTATCTATTTTTTCCCCCTTAGTTTTCT  
TTTTTTTTTTTTCAAGTCTCTTGTGCAACTTCTTCTTCTTCTTCTTCTTCTTCTTCTTCT  
ATGTGTATCATCGTACAATTTTTAAATTATATGTTTTTTAAAAATCTTTTTTACTCACAA  
CCTCCATTCGATTTTGCCCACTGCACTTGACACACGAATGCATTTTATTCTCTTTCTCT  
TTGTGTATAATTTTAGAAATAATTCGTGTAATTTTACGGCAACGATATTGTGCAATTT  
TTTACTCCGAATCTTGGTACCTGTACCGATAACAATATGGATTTTTTCATGGCTGTTTCT  
CACTATATTTTTGCTCATCTGTATTGTTGTGCCCCTGTTTCTCGTGTTATTCTAATCTATAA  
TGTTTCTAACATACGTTTGTGCGATGCTCATGTGCGGATCTCATTTGTAATTGTAATTTAAA  
AACAATTCTTAATTTGATCAAGAGAAAATATCGTCTGCAATAATAATTTAATGCGATGC  
TTTTTAATTTGTTGAAATATTTCTAGAAATGAGCTTTTTGCAATTTGTCCCTTATTTTTTT  
TAATTTTTTTTCTTCTTCTTCTTCTTCTTCTTCTTCTTCTATATCTATAAACGAAATGTA  
TCTAAATATCTAAATATTGTGTGTCTTGTGCGGAAGATTGATTAGAAAAATTGTAAATTTT  
TGATTAGAGTATCGCATAATTGAGCGAATATTAAATATCAAAATTAATAAGATTTAATTAA  
TAAGATTTAATTAATTATTCGAGATAAGAAGATCTCGTGTACGCATTAATGAATCATTCTG  
TTGCATTATTTAGAACTTATACCACGACCAGCCCATTCCCTGCGAGGATCCTCCATTGTAC  
CTGAGACTGCGAACCGGAAGACCTAAGGATAAGAAAATTCCACGCTCAACGCCTATTA  
TGAGCTACGGGAAAAAGAAATTACGGCCTGAATACTGGTTCAGCATACCCCGTAACAG  
GTAATAAAAACATTGTTTCCTTTGTGACACATTTCAATTTCTCTCCCCTTTTTGATAATT  
TCATTCAATATTGTAAAAATGTTGTTATTGATACACAGCAGTCTCATTAGATATCAAAATA  
AGATATTTTAAAATACACTCTTCTTTTGATAAAATATTATCAAAATTCTATCATTAATAATT  
TTAATAATTTCTAGAATTTAAATAATTACTCTATTAATTCAAATTATTGTTAGAAGACGA  
CAGATAAATTTAGAAAATTCATCTAATATTATAATATTTTAAACTTTTCATTGTAGTATTCT

CAATTGTCTCCTCGATTTCCTTTGATTTAATTTTTTTCAATTATTTCTGAATTATTGCAAAA  
TCTGTGAAAGATTTTCAAGAGAAAACACTACTATCTACGAATATCATTTCCCGGATACGT  
GTTTCTTTACCTCTATTTATATGTGCGATTTCGCGGAATCCTAATTTAGGAACCGGAAA  
CGGCAATGAATCAATCGTTTTTTTACGGCTAACTGATATAAAATATCCTCGTACAACGTT  
TCCAAGTGAGTAATTCTTGCAAGATCGTGCGTTATTTTTGTAAATTCACACCTCGTATC  
ACGTTTCGCAAGACTAGACCGGCCAAAAAAGAGCGAAACACGTGATTCCCTCTGTAAGA  
GCGGCAAAATAGGTCTCGAGAATCGGCATCGTGCTTCTTGCTATTTATACCGATTCTTTG  
CCTTGCGTTTTATGTTTCGTCAACTTTCAACGAAACACGTTCCACACACGTTTTCTTCGTT  
CTATTTTATCGATTGAGATGTTTGGACAAAATAAATTCGATATAAACTAATAATAATATT  
CCAAGATAAATGATAATGGCCGCGTTACGACTTGTAATCTTTGCTCGACAATTGTGCGAA  
GGTCATGTGTGGTGTGAAGGTATATTCTGTTTCAGCAATCGATTTTAATACGCGGACAATA  
ATCTATATCAATGGCAATTCCTCTTTTATCAATTTTTTTTATTTTCCTATCAATGTTGTAAAT  
TCAAATTGAATTTTAATTTACATTTACTTTGTAAATCTAATCTATGATAATTTTATGATCTA  
CTATTTAAATTTGTATTTGGGTCAAGTCTAAAAATATTAGATGTATCTTATCTTTCTTCCTC  
TGTGATTGATTCAAATTATTATTATTAATATTCAATAATTATATTTTTACTTATCCTGATAAC  
TTGTGATTGTGATGAATTATACAAATTCATTAACCTTTAGAAAATTTTCTAGAAACAAATC  
TTGAACAAATTGAATAGAATAATTGAATCTATTTCAAGTATTTAATCACAATTTTGTTGG  
ATTGAAATAATTACACACTATAATGCTCCCCCTACCAGCAATCAATGGGGAGAAATATCG  
AGTTGAATGTTACGGTAGTCAAACACGTTTCAACTTAACTATCCCCATTCATTATGTGA  
ACGTCTCTCGAGTTAATCGAGCCGATCTTTAATTAATATCCAAGTTGAACACGTTACAC  
GTGAGAAGTAAGCGCGAGAAATCACGTGACATACTTGGCGTATCATCGAACGTGCCTC  
CATAACTTTTCCGCTCGATGCTCGTGATACTAGTCTGTTTCGCGCGAAGAAAACGCATCG  
GAGACGCGCCACGTGTCGGTTGAAAAAATAATAATAATCGTTTCTTCTT  
CGTGAATTTTTTCTTCTTTCTTTCTTTCTTTTATTTATTTATCAATGATACATTATCGGT  
TTGATCGATAATTAATTGAGGAGCTTTTTGGGGAAAAGGGATCATGAGAAAAATTTGAA  
TTAAGTAAGTTTAATTTTATGTGTATATATATATATTTATATATTTTGGATATAGATTATTTT  
TTTCAGAAAGCTCCTTATTATGTGTTTTATTTATTGGTAAACTTAGGTTGAACGAGCTG  
AATTATTATTTTATCGAAATGTCACGTGACGATTGGATTATACATTTATCGAAATTATCTG  
TTGTAACCTGGTGAACAGCTTCGTTGAATTTTTATTATATAAATTGTTTATCGCTCGACAAT  
TTTAGATAAATGAAATTCATTGCGTGACCGTTTTAGCATCGTTCTTAGTGTTGTCATTG  
GCAATTAAAAAGGATAGAATATATGAGTTGATTAGGAAAAAATGATATTTTGGTAAAAA  
AAAAAAGCAACTTTGAGTTTATCGCACAATAATTATTAATTTAACTTGATAATG  
ATAATTAATATTTTGCAATATTTTCCACAGAAATTGGATAATTTTGCATGAATTCTTAT  
GTTGGCATCTTATGATCATTGGGATGGACACGTGTATAATAGCTTGTTTTTAATTGACAAT  
AATTGAATTATCATTACGTAATAAATAATAACGTTATTTTAATTTCCCTCCTCCAAGAGA  
AGAGGGATAATGAATTTCAAGATACATGTGTAGTATAAAGAAGTGATGAGTCTTCTCAG  
AATGTACATAATATAGAATTTAGATAACAAATCTTTAAAAATGTAGATAATTTTTTCCAGA  
ATTATAATTATTCTCTTGCCCAAGAACAATTATACTCGTTCAAAGGTAGATTTTCAGAAA  
TAAAAATAAGAAATCTTTGAATAGCATCATGAGAATCATTTTATAGAATTGTTTCATACA  
AAAGTTAAAACTCTGAACGATTCTCTACAATTTCAATAACCCATTTAAAGAATATTCA  
TTGCTTAAATTTTAATTAATATTCCAAAACCTTTAACTTTCTAAAATTTCAATAATAACA  
TTTATTGTTATTTTCAAAGAAATTCTCAATAATCCCAATCAAAGAGTTTAAGATTAATCTT  
TAAATTAACCACTTCCCAAACCCTTCAAATTCAGAAGAAAAAATTTGCATAGAACTT  
TAATCTTTACTACCTCAACGACACGAATGATCGTCGACGATCTTGCAATCGCAAATCTG

AAATCCGTCACACGCATATCCGATCCAGTGAATACGTTACATAACAATAAAGAGTGTT  
GCACAGCGGGAGAAATCGGGAGAGAACGGTCTGTGTTGGTCATCATCACGCAGTCGG  
AGATTAGGTAACGCGTCGAAGAAGCGTCTAACCTAAGCGATTACGTTCTCTCTTTTGC  
ATACCGAACTGCCGTTTTAGAATAACATCGTGTGCGCTGAATGGTCATTGGAAATTGG  
AAAATGTTTCTTCACTACGAAACATGTGTACGGAGCAACATAGTGACGTACGAGTTGA  
CGCGATAAGAAGAGGTGGAGGATAACGAATGCGAGGTGTTGATTAGATAATTCTGTTA  
GATTCGTTTCGAAAGACAGTAGAGAAGGAAGGCATTACGTGAGTTATAATCGGAAATG  
AACCGAATAATTTGTAAACTCGTGCGATTCTCTTTTAAATAGAAGATCGAAGAAGAAAT  
TAAGAGTTCTAAGATTTTCTTTTTTAATGGAATAGTTTGTTTTTTAATTAGAAGGAGGAA  
CGTCTGAATTCATAGTTTTTCGTGTAGAATAAAATTTGTAAAAAGGAAGTGTTATTTT  
TTTTTTTTTTTTGGTGAATTTGTAAAGGAATAATAAGTAATAATTAATTTTGTATTGGAA  
TAATAGTAATTTGATAATATTGTGTTGGAAAATATATATAAAAAAGAGAACTATGAGTTTT  
AAAATAAAATTTTTCCATAATCGCTATCAATTTTTTTTTTTTTTATAACAAGTACACTTT  
GATAATAAGCTATTTATTTTTTAATACAATGTTTAATTTCAAATATCTATTACTATTTTGT  
ATTATTTATTGCTATTTTTATTAGTCTTTGTCTCTGTCTAAATGATTATTATTATAATAAAG  
TTGTTATGTGCCATTAAAAAAGAACGATAACAGGTGACAATGATAGGAATTATCGTGA  
GGCGAACAATCGAGTCGAGTAGATAATGTATTTTCGTGCTCGAAGTTAAATTTAAACTA  
ATCAAAAAAAGTTGTGTTCTATTTTCGATTTTATATTTTGCAAGAAATATCTTAATTTTT  
ATAATCTATAATATTCTATAATATTAATATTGCAAACATTTGACTCTCGTAAAAAAAAA  
AAAAAAAAAAGAAAAGAAAAAAAAAATTAAAATTTACAGTAGTTTGCACAGTAGTTT  
ACGTCATCACAGGTAATTATAATGAATATACATAATTCCCGAATGATTCACTCGTCTAATT  
CTTATGCAGTCTACCAACACAATTTAACAAGTGTCTCTCAAGGGTCCTCATCGGTTGC  
ATCACGTTTCGTATTGTTTCGTAGCCTGTTGAATTTAAATAAATTCATAAAGAATTTTTAT  
TCGTGATACACAAAATATTTAAAAATCGTGCGAATAGAAATATTAACCTTGTAAGTTTAA  
ACATCGTTTCGTAGTCAATCGACTTTGACAAGTGTTTCCACGGGGTCAACATCAGTTGC  
ATCACGGACGCTTTGTATTTCGATTCTAGTAATAAACTACTTGATCTTAAAAAATAAATTC  
GAAAGGAGAATAAAATTTTCAGCGTGTTTTTCAAATTTATGTTGAAAATTCGCGTGACA  
CGAATATTATAAATCAGAATATAAAGTTTTAAACAAATTCGAGTGTGTTTCTACGGGG  
TCATCGTTACGTAAATCACGGACTCTTCTTTTTTCCGATTCTAAAATAAATTCGAAACGA  
TAATAGTTGAGTGCTTCAAAGTAAGTAAAAATATTAATCGAGGTAAACAAAGATTGCG  
TAATATTTTGCAAGATTCAGAAAGGGGAACGAAGTGTTGTTAGAGAGGAAATAGGAAA  
CGACCTTGATGGTCGTGACGTTTGAAGCGCAAGTGGTATATCGGTTAGAGAAAGTC  
AATTCGATCTTGATAGAGGTGCACGAACGTGGTGGTGAACGTGTTACGATACCTGACG  
AGGCGGCAAAATGAATTGGACATTGAGCAGTGTGCGCAACGTGATGAATTCGTGTAC  
AACCAGAGTGTGACGAACGCTGTGCAGAACGTTATACCGTTCGTCAATCGAAGGGTGG  
ACGACCTCTACAGGTTTATCCATGCGTGGGTGCCCTCGCTTTATGGAGAGCTCGACGA  
GAATTATTGGCGGGAACGTGGGTACATCCTGTTGGACACCGACACGGATCTGTCGCC  
GAATTGTCGGGCGTGACGAGGCTGGGAAAGCGGGGGAAGGAGCCACGGAGGAAGG  
GAAATCTCGCCAAGACAGCGACGAGATATCCGAGCTGACGAGAGAATCATGGGAG

>novel\_circ\_000782

GTCCAGGCGAATGTCCCAGGATATCACCCATTCGAGATCCACCGAGAATCTCACAGTAC  
CGTATTTTCAGGTACGTAAAAAAATTCGAAATTCATAACAAATTCGAGTGGCTGTGCGA  
CGAATTGCAAGCATCACGTACATATACATATATATATGTATTTTTAATCTCCATTTTATATA

TATATTTTTTTAATGAACAAACATTTTTTTCCTTCTTTATTGTTTTTTTTAATATATTATTCC  
AGACTGTAAAAAATTCTGGACTACTTGTTCAAGTGATCAGCAAAAATTTCTTTTTCCC  
TTTTAATAATTATTTTTTTTTTAAATACTTCGTCCCGTGATAACGAATCTTTGAATATATTA  
TTGCAATTTAAAAAATATATATATATATAGTTAATTAATTTTCTTCTTTTTTCCAAAAAAC  
AAAGTTTCATTTATCGGATTAAGGATTA AAAATCCACGAACACGACGCAAGTTGAAGT  
AGCACGGCTTAACAGATTTTACTTGTTGCGACATCGGATAACCCGTTACGCCCCGTGC  
TCCTCCATTCTGTAATTTGTTCTTTTCTTTTCTTTTTTCTTTTTTTTTCTTCTCCTCAT  
GACCAGTAATTTCAATCACGAAAACCCCATTTGTTGCTTGCTATCTTCGCCGGCCGTTCG  
TCTCGTGGATTCATCCATCTTGTAAGGATCCGTTTATACGACGCATGGTTCGTTGCTTCGT  
GAAATTGCATTGTGCCCCGCTTCACTGGCTCTGCTTTTGCAAATAAAACAAAGAGAAA  
GGGGAGGGGGTGGGGAGGGAAGGGGATTGGAGCAACGAATAATCGAGATTTTACTT  
GGGAAAGAGACACGCTTACGCAAAAATGTAATGAAATGATTGAAGAAGAAGAGACAA  
AAGTTAAAATCATAATTGCGTTGGCTTAGAAAAAAGAGAAGAGGAAAAGTAAAATTAT  
TATTAATTTCAATTTATGATTATTTTTGTTCTTCTATAAGAAGAATAAAAATAATTTGTCTC  
CCTAAAAGAGATTTTAATTTTTTTCGATGTAGATATATATACTTTTCAAATTTGATTAAG  
GGAATTTGATTGTGCAATGAAGTAAAGACTTAAATAAATATTTTATTAGATCTTCTTGAA  
TAATAAAAATAATAGTAATAATAATAATAATCATGGACACGATCCAGATTAATTTAAC  
CTCACGAAGGATTAAATAATGTGAAAATTAGCAAAGAAAGTGCAAATTTATCGTTCTAA  
TCTTGATTTATTGTTTCGTAGGAGCAAGAGTCGTAGCGTGGATCATGGATTCGCGGCGC  
CTTTCGACTGGGATTCGTGGAAGAACAAAGTCGATCAAGGACGATTCGAGTCGGTTCGA  
CGAATTCGCAAAGG

>novel\_circ\_000783

TTTACGTATTTGCGGTGCTCTTCATCGCCAACTCGATGCAAGCTTATGTGCCTTGCGATG  
GTAAACCAGCCCCAACGAACGTGAAGATTTTGGGTTGCGATACTCTGCCTTGCAATTT  
GGTTAGAGGAACTAATGTTGAGGCTAACGTTGACTTTAAGGCTG

>novel\_circ\_000784

TTTACGTATTTGCGGTGCTCTTCATCGCCAACTCGATGCAAGCTTATGTGCCTTGCGATG  
GTAAACCAGCCCCAACGAACGTGAAGATTTTGGGTTGCGATACTCTGCCTTGCAATTT  
GGTTAGAGGAACTAATGTTGAGGCTAACGTTGACTTTAAGGCTGTTGCAAACACGAAA  
ACTCTGAGACCCGTAGTAGAT

>novel\_circ\_000785

ACCCGTAGTAGATGTTGACCTAGGAAACAGCCACATGCAATACCCACTCCCAGAACAA  
AATGCTTGCAAGAATCTGGTGAACGGACAGTGCCCATTTGCAAAGTGGACAAGCAGCT  
ACTTATTACCTTAAGATGCCAGTTCTGAAAGCCTATCCAAAAGTTGCTCTGACCATCCA  
ATTATCTCTTGTTGACGAAAATAACAATTCTGAA

>novel\_circ\_000786

AATTGTTATTTTCGTCAACAAGAGATAATTGGATGGTCAGAGCAACTTTTGGATAGGCT  
TTCAGAACTGGCATCTTAAGGTAATAAGTAGCTGCTTGTCCACTTTGCAATGGGCACTG  
TCCGTTCAACGATTCTTGCAAGCATTTTGTCTGGGAGTGGGTATTGCATGTGGCTGT  
TTCCTAGGTCAACATCTACTACGG

>novel\_circ\_000787

TGAGCAGGCTCCATTGCGAATCCGAGTCCTTCAAAATGGACTTAATCCTAGACATTAAC  
AGCTGGCTGTATCCTATGGAACCTGGTGACAAATTTCTGTCTGGTTCTGGCTACGACTTT  
GAGAGAGGACGGTTATCCTGATGGAGGGGAGTGGAACGCGACTGAACAGGAAGGCG  
GTTCCAGAGCAGACAGTTTTGAATATGTGATGTCCGGTATGGTTTATCGAATAGAAGGT  
GATGAAGCAAGCAATGAACCCAGCAGTAGACT

>novel\_circ\_000788

ATGAAGGCGGCCTATAGAGCTTTTCGATGCATTCTGTGAACTTTCAGAAGATGTTTGAAC  
TAAATATGAACGTAATCCTATGGGCAATTATGGATACGTGAAGCCAGGACCGTCAAAAT  
ATACTGATGAAAAAGAAGCACGACATGTTTTCAATGTGATTGGATGCGGAGGAACTCT  
TCCGGATGAAGAAGTGCCTGGTTTCAGATTAGCAGTCAACGAACTTGCTCGAGATTTT  
AAACAACGTCTGCTATGCTTTTAACT

>novel\_circ\_000789

TATTACTTCGATCATTTCTTTTCATTATCTTCTTTTAAAAACAATTCAAGAAGATCACT  
AAATGCTACTCCAGCAAGCATACAAACAACCTGGAGTTAAAGTGAGCATAAGTCGCACC  
ATTACTCCAGCAAAATAAACAGCGCTTATAGCATATAATATAACTGTAAAATAAATAATT  
AATAATTTTTATAACAAAATAGTACTATTTTGAATCTTACCGAAAACGCGTTCATCGTTA  
ATACGTTTAAATGCAGTACCAGAGGCCTACAGGAAATGTTGTAACAAGAATATGTAAATC  
AAAGAAAAAACTAAACCATGTAGTAGGTTGATGTTTCAGAAACAGATGCTATTATTGGAA  
TGTGTATTTTTGCATAGCCAGTATCCAGAGTGAATAAAATCTTCCACTCCAAGGTGCA  
ACAACACCAGCATAAGTTAAACAAATTAAGCAAATAAAAAGAATACCAGCTGTAACGTG  
CAACTATTCTCCAAAATATTTT

>novel\_circ\_000790

TGTTGATCAAAGAAAAAGCACAAGGAAAGAACTGAAAATGATATTTGAAAAATTGTT  
ATTGATCATTTTCCTAATCGGGATTTATTTTTCAAAAATCCAAGGACGAGGATTAATGCT  
CGATCCTATTAGTAGGAGCAGTGCTTGGCGAAAAGGATTCCCTGTTGAGCCGAATTACA  
ACGATCATGAACTCTTCTGCGGAGGATTAAATATCCAATATGAACAGAATGAGGGAAGA  
TGTGGCGAATGCGGTGACGATTACGCTATTCTGTCGTCCAAGACCAAACGAGAACGGTG  
GTCCTTATGGAACCGGTGTAATTGTCAAAAG

>novel\_circ\_000791

GATAAGGAAGAAGAAACGTTTGAACGAGGATACGATTAAGCGAAGATGCGAAGACAC  
GCAGGATCCAGAAAATGAACGATGAAATAATCGCGAAGGGTTTGACCGGTGGCGGGA  
ACATTCCGTTTCGCGGACGAGGATGGAGCGGTGGCGGGGCTGGACGATCGCGGCGCGC  
GAGAGGTGACGCGGAAGGAAGCGCACGCTTTCGGGACGTTTCGGTGGGCCGTCGAGG  
AGGATCGATCAAGAGGGAAGGAGCTGCTCGTCGACGGTGCTCGAACGGAATGCGAGC  
ATGTCGGTCGGGCAGCAGCAGCAGAGGCAGTACAAGCGATCGCCCGGCCCAAGG  
AGGATCGGCTCGAGGAACGAGGGGATCGAGGGGAGCGGGGAGAATCCTCTGCAACG  
GTACGAGAACCGCGTGTTGAAGTATCAGAGGGCGAGCAGGCAAGGGAGCCGGGACA  
GGATGCAGAATCACGGTTGCTCGAGCAGCGACGAGAGCGTGGCGAGGAACAAGTCTGA

AGAGCATCAGCTCGATCGACACGCAATCGGTGAACAACATATTGGACGAGTACGAGGA  
CCTCGATTACGGGAGATCGTCGGATCTGAGCGACGTCGGGAGCATAAGCGTGTCCAAC  
TTCGAGGCCGTGATGATGGACCAGCGGAAGAAGCAGCAGCAGCAGGAGAGGTTCGAG  
AGCGTTGGCCGCGTCCAGGATCCAGCCCAAGTGCCTCGCTGCGCGGGAGAAGTCGCA  
GCTGGTGGCGAGAGCGAGCCAACCGGCCAGCAGCCGAGACAGAAGGAGTCGTCGA  
GGCACGCGGTCCCGCAGTCGCCGATCGAGGACGGGCCTCGGCCCTCGTCTTGCGTGCC  
CGTGACCGTGGACCCCGGCCGGGCGAGAGGTGTCCCGGAGGTGTTGCTTCGCAAGGG  
GGAGGTGCAGAAGAGGGTGGACGAGTGGTTGAACCAGACGCAGAGCCAGAATTTCA  
CGGTCGGGGCGCGGGAGAAAAGCGTTGACCAGGTCTGAACAGCAGCGCGGACCAGAAG  
AGTCAGAGGAGGTACAGGCAAGACTCGAGGTTCGAGATCGATCGACGAGGGGCAGGGA  
CAAGTCGAACGGGACCTCGTCGAGTTACGACGATCTCAGCCGGGCGGAGAAGAAGGC  
GGAGCGCAAGGCGAGCGCCGACAAGGTGAACGTTGGCGTGAACACGAGCAGGGGGA  
CGTACAAGGAGTATCTCGCTTCGAAGAACGGAAGGAGCGGCGGCAAGCAGCAGGATT  
ACGGCTTCAGCGCGTCGGGCTGCGGCGCGATCGGTAGAACGAGGGACATGAGCCCTT  
CGACCGCCGCTTCGAGGATTCCGCAGAGGGGCCCCGTTGGGCTCGAGCTTCAGGTCTGA  
GGCGAGGACTGGACTCGTCGGGCAACGGCGAGGCGAGCCAAGCGGATAACAGCGGG  
GGGGAGCAGGCGCAATTTTGCCAGGGCGAAAAGAACTGTCGCGCGAGAAACGCGGC  
CGACGCCAGGCCGACGACGACGACGAATTTGGTAAAGACGAGAAACGAGTCCGATAT  
CCACGGGAGGATATCTGGGGTGGTGGGAAGCGGCGTTACCGGTGGTTCGACAACATCG  
GCGTCCACGTCTGCTGCTCGGTTATCCCGTGCAGGAAAGCGTCGTTCAAGCGGTCTGC  
AGAGCCACGATCAAAGCGCGGCGCGGCCGCTCGTTAAGGAAGAGACAGGCCAGAGA  
GGGAGCAGAGGAGGGAGCGGCATCTCCAAGGGCCCCGGCCAACCTTGGTGACCAAGG  
CGAGCCGATCTCGCCAAATAAGGACGGAGAAAGTAGGCGGCCGGCTCTCACGACCGA  
TTCATCGCGAACGGCTGGTGATAAACCAGCCGATGTTGCCTGTAAATCGATCGAGGCT  
GCGAGGAGCGGCGCTGATCGGCCACGCGGGATATTATCCACAGGGTTACGGGTGGTG  
GTGGCGAGTCGGGCGAGACTAGGAGGTGCTATCCCGTGCAGGACAAGAGAATGGATC  
AACAGACGAGGCAGGAGGCCGCTACCACGGTGGTTTACGGCGCGGTTGGCGCCCCGCG  
TGCGGACCCTCCAAGGTCACCAGGAATCCCGCGTCACGAAGCCGAGGAATCTCCAAG  
CCGGCCTCGCCCCGCCGAAGCTAGAAAGCCGCCGTTCTCCCGAGGAGGGATCAGA  
TCCCTTGCTGCCAGGAGGGGAAGGACGACCGGGCTGCGAAACGGTCGCCGATCGGCT  
CCCCTCGATCCACGTTCAAACCGAACAGTCGGGTTTACGCGGCGTTGCAACAATTGAA  
CGAGCAGAACTCGGCCAAGTCGAGGTTCGGCGGGCAACGGTCCCGCTGACAAGTCGCC  
AGCGAGATCCCCTACTCCTCGCCGAATCACGCGGTGGAGAAGATTTACGAGCGCAGT  
CTTCAGCCCCAGGTGATTCACGTGGATGACCTCCAATCGATCCTTCGACCTTCTTTGCA  
GGTTTCTGCTTACGGCGAAGGAGGGACGGCCGGTCGATCCGATCGCAAGTCGCCTCCC  
GGAGAAGTGTTGTGCTCGCCCAACGAAACGAAAAGGAGGACGAAGAGGAAGAGGA  
AGAAGAGGAGGAAGAAGAGGAGGAAGAAGAAGAAGAGGAGGAGGAAGAAGA  
AGAAGAAGAAGAGGAGGAAGCGGAGGTTTACGAACGGGTCGGTGAGTTGCGGTACG  
AACACCTGGAGACTATCGAGGAAGACGATCAGAAGAGCGAAGCGTCCGTTTGCGGAT  
ACCCAGAGATCGGGTTGAGCCGATGCTCGAAGATCGAGCGAGGGCTGGCGAACGGTA  
GGTCGCAGGAGAGGAGGAAAAAGAGGAAGAAGAAGGAAGGTTTGACGACGCAGCG  
TTCGAAGCCGGATCAAGGGAACGAAGCTGGCAGGACGTTTCGTCACGTTTCGCTCATCC  
AGTTCCCCCAGGACATTAAGGCGAGCCTGCAATCTCGACCCGCCGCGACTGGTTTGT  
CGGAGTGCAACGAACAGCAGGAAAAACGGGAGATCGCCGCTGCCGAGGAGCCGCCG



```
>novel circ 000792
```

```
>novel circ 000793
```

GAATTGGAGAGAAGTTATACCCCTCTCGACCCCGGGGGGTAGCAGCCCCGTTTGTGTGCC  
CGCCCTGCAGCCCGCCCCCTGCGCCGGCCGCATACATATCGAGCGCACGTGCGTCCCTC  
GCGGAGACTCGGCGCCGGAAGCGGAGGCCCGCCGTCACCGGAAAGGGACCCCTTGG  
GAAAACCTGTTAAGATTCTCAAGTCCTTCTACAGGGAGCTGGGCACTCGCGATCCACC  
CCATTTGCCTGGGTGGGCGTCGCCACTTCCACTCGGCACCCTTTGTCCGGCGCATTTC  
AGCCGCACCTGCAGCTGCTCCACAAAGGCGAGCAGGAGCACAGGCTCGAGAACATCA  
AGCCCGACCAGATCTTCGCCCCCGTCAGGTTGAGCGACGGCACGGTCTCGGAGGCGC  
CTCGCCGCGTGGCCATCGAGGGCGGGCCAGGAAGCGGAAGGACGACCCTGTGCCTCC  
GCCTGCTTACCAGTGGGCGATCCAAGGCGACGGCCCCGGCTCTGGCCTTCATCGTCCC  
GTTGCGCGAGCTCCGCGGCAGTCCCCTGCTCAATTACCTGGCGCGGGAATTATTCCCA  
AGGACGGCAGCCATCGGCGACGCCATCGCCCAGGTGTGGCGCACGCTCCACCTGATG  
GAGGATCGCGTGCTGTTTCATCCTGGACGGGTACGACGAGTGCGTGGGCGGCAGAGCG  
TCCCTGGCCGACGCGGTAGACCTTCTGGAGGGGGCGCTTGTTCCCGGACGCGAGGATCC  
TGGTCACGTGCTCGCCCGGCAACTCGACCATGCTCTCGCCCCTCGTCCAAAGAAGGAT  
CCATTTGGCCGGGTTGGAGTGGCCCCACGTCGAGAGGCTATGTGTGCGGTATTTTCATCC  
ACAACGACATCGCGGAGAAGGCTTGCGAGTTCTCTGAAGCGTTAAACGTGCAACCCC  
AGACCGTGAAACAGCTTGGTCAGCACCCCTCTCGGTTGGATCATGCTCTGCTGCCTCTA  
CCAGGACTCTGGGAGTTTGCCAACGGAGACCAGCGCGCTGGTTCAAGCAGCGGTCAA  
GTGCATCGTGAAGCGGAGTCTGGATCCACCCGTCCCTTACAACGAGGAGATCCCTGGC  
CATTGCAGGAAACGATTGGAAGACTTCGGTAAGGTGTCGTTGGCCGCGCTCAGGGAA  
GGCAGGTGTTGCTACACGGAGGCCGAGCTCCGCGCACGGGGGTGGAGGGATCGAGGTG

ACCAGGCTTGGCTTCCTCACCAAAGGATTGACGTTTCGGCCAACGGCGAAAACCTGAC  
CTGTACACGCCCATCCACATGGCCGTGGCCGAATTCCTGGCGGCCTACTACTTGACCTC  
CGTCGCCCCAATACGCCAACATACTTCGAAGAGAGTTGGAGGGCCTCCCGTCGGGGATC  
ATCAGCCACTTGGCCGGCCTGTTGGGGCCCCAAGACGCATCTGATATTGAACCAATTGTG  
CCCGTTGGAGGTGCCGCCAAGGGCTGTGTTCTCCCTGTTGAAGGCGGCAGGCGCCTC  
GGACGGAAATATCTCCGCCGTGTGCAGATTGGTCGGCGCCGGGCCCCGGCTTCGGCCCC  
GCGCCCCAACGAGAGGCCGCCCGCTCCTCTCGTCCACACTTCCCCCCTCGAGCTGGAGG  
GGTGGGCGAGAATCCTCGAGAGCGCGGCGTGCACCCTCGAGGCTCTCGAGGTTGTGT  
TCCAGGTGGAGAGGGGCTCCGATCCGAGATATCTGGACGACTTTTTTCGAGGCGTTGGC  
CGGGAACGAGAGCGTGAAGCTCGTCAGGATCACGTCCCTTCTTGACAAGAGTTCCC  
CGCGGACGAGGCGCAAAAACCTGGCCGGCCATTTGAAGAGCGTCCTCGGCAAGAAGA  
AACTGAACGACTTTGAACTGGTTATAACTTGTCTCGAGGAAGCTGCCCCACGACAG

>novel\_circ\_000794

TTGAGCGACGGCACGGTCTCGGAGGCGCCTCGCCGCGTGGCCATCGAGGGCGGGCCA  
GGAAGCGGAAGGACGACCCTGTGCCTCCGCCTGCTTCACCAGTGGGCGATCCAAGGC  
GACGGCCCCGGCTCTGGCCTTCATCGTCCCGTTGCGCGAGCTCCGCGGCAGTCCCGTGC  
TCAATTACCTGGCGCGGGAATTATTCCCAAGGACGGCAGCCATCGGCGACGCCATCGC  
CCAGGTGTGGCGCACGCTCCACCTGATGGAGGATCGCGTGCTGTTTCATCCTGGACGGG  
TACGACGAGTGCGTGGGCGGCAGAGCGTCCCTGGCCGACGCGGTAGACCTTCTGGAG  
GGGCGCTTGTTCCCGGACGCGAGGATCCTGGTCACGTGCTCGCCCGGCAACTCGACCA  
TGCTCTCGCCCCTCGTCCAAAGAAGGATCCATTTGGCCGGGTTGGAGTGGCCCCACGT  
CGAGAGGCTATGTGTGCGGTATTTTCATCCACAACGACATCGCGGAGAAGGCTTGCGAG  
TTCCTCGAAGCGTTAAACGTGCAACCCCAGACCGTGAAACAGCTTGGTCAGCACCCCTC  
TCGGTTGGATCATGCTCTGCTGCCTCTACCAGGACTCTGGGAGTTTGCCAACGGAGAC  
CAGCGCGCTGGTTCAAGCAGCGGTCAAGTGCATCGTGAAGCGGAGTCTGGATCCACC  
CGTCCCTTACAACGAGGAGATCCCTGGCCATTGCAGGAAACGATTGGAAGACTTCGGT  
AAGGTGTCGTTGGCCGCGCTCAGGGAAGGCAGGTGTTGCTACACGGAGGCCGAGCTC  
CGCGCACGGGGTGGAGGGATCGAGGTGACCAGGCTTGGCTTCCTCACCAAAGGATTG  
ACGTTTCGGCCAACGGCGAAAACCTGACCTGTACACGCCCATCCACATGGCCGTGGCCG  
AATTCCTGGCGGCCTACTACTTGACCTCCGTGCCCCAATACGCCAACATACTTCGAAGA  
GAGTTGGAGGGCCTCCCGTCGGGGATCATCAGCCACTTGGCCGGCCTGTTGGGGCCCCA  
AGACGCATCTGATATTGAACCAATTGTGCCCGTTGGAGGTGCCGCCAAGGGCTGTGTT  
CTCCCTGTTGAAGGCGGCAGGCGCCTCGGACGGAAATATCTCCGCCGTGTGCAGATTG  
GTCGGCGCCGGGCCCCGGCTTCGGCCCCGCGCCCAACGAGAGGGCCCGCCGCTCCTCTC  
GTCCACACTTCCCCCCTCGAGCTGGAGGGGTGGGCGAGAATCCTCGAGAGCGCGGCG  
TGCACCCTCGAGGCTCTCGAGGTTGTGTTCCAGGTGGAGAGGGGCTCCGATCCGAGAT  
ATCTGGACGACTTTTTTCGAGGCGTTGGCCGGGAACGAGAGCGTGAAGCTCGTCAGGA  
TCACGTCCCTTCTTGACAAGAGTTCCCCGCGGACGAGGCGCAAAAACCTGGCCGGCC  
ATTTGAAGAGCGTCCTCGGCAAGAAGAACTGAACGACTTTGAACTGGTTATAACTTG  
TCTCGAGGAAGCTGCCCCACGACAG

>novel\_circ\_000796

ACATCGCCATGGACTGGTCGGATCACGCGTTATGGTGGCCGGAGAGGAATCACTGGTT

GACGAGAACGAGAAGCACTCTGGACCAGTACGGGGTCGCAGCCGATGCCCTCCTTCA  
CTTCACACCGATGCACAAAACCTCTGAGAGTCCAACTGCCCCGATATGCGCTGCCTCGATT  
GCAAGGTCGACTTCTCTGTGAAAACGTTCAACGCCGTGATCAATTTATGCAAGGAATT  
AGGTATCAGACACCCGGAGGAGTTGTCGTTCTGCAAACCGCTCGAGCCGAATCATCTG  
AAATACAATTTGAAAGATCTGCCGGCTAAGAAGAAGATCGAGAACCAGAAGAACGGG  
CATTGGAACGTTCCAGCGGATACGAACACGTTTCATCCCGGTGAGCCAAAGTCCCAGGG  
GATCGACGGGCAGCCTGGATCAGAGCAGCCCTTTTCATGTGCGCGCCGGTCACACCCAA  
CAACAGAAACCACAGCACGCCGATCAGCTCGCCCGTCTCT

>novel\_circ\_000798

GTTGCTCCATCATCAGTATTTCTTTCTCAAATCTTCTCCTATATTTTATATATTTAATTATT  
TCGTTCACTTTTAATGCTACGAAACAAAATATAAATCAAGACTCGAATCGATTAAAAATT  
ACAAATGGGAATCAAGCTTATATCCCATTTGAATAATACGTTGAATTGTTTCGTTCTCCAAT  
CGCCGCCATCTTGGCCGGCCAATTGGAAGAAGTGAAGGAAAAAG

>novel\_circ\_000799

GTTTGACGCATCACGCGGTGCGCACCCCTGGGCTCGTTGATGTCCTGCGTGGAGGAGGG  
GACGAGGGCACGGAAGACAGCGTCCACGTTGCAGAACCCGAGCAGCAGCCGAAGCC  
ACGCTCTGCTCACGATCGTGGTCGGCGAGGGAAGCGAAGAAGCGTCGTCCTCGAGGA  
GGAGGAGGCCGTCCCGCGGCGGCAGCAAGCTGCGTCTCGTCGATCTGGCGGGGAGCG  
AGAGCGCGGCTACCTGCGGTGGCGTTTCATCGGCTGAAGGAGGGCGCGAATATAACA  
AGAGTCTAGTGGCGCTGGGGAACGTAATATCGGCCCTTGCGGAGAGGCCAGGAAGTG  
GCCAGGAAGGAGGTTTCATCCCTTACAGAGATTCTTCGCTTACTTGGCTGTTGAAGGA  
CGCACTTGGCGGAAATGCCACTACCATTATGCTCGCCA

>novel\_circ\_000801

ACAAAAAGAAAAAGGGGAAAAAATATGACATAACTCTCCATTATCAATTTGCTTGAAC  
GATAAAAAGGACCAAACTAAATATATTGGGAATTGTTTCTCAATAAAGGGGAGAAAGA  
GAGAATTGTGTGAACATAGATCACGTGAGAACGTGGAAATGTCGACCGAAAAATCAAA  
ACGGTTCGCTGGTACACAAAGCAACGGAATAAAAACCACAATTGGTTGGTCGTCGTC  
CACAAGGACTGTCTCGAACAATTCATCGTTTTTACATACTAGCAACTCGATGTTGAACC  
GTGACAAGCCGCGTCAAGTGCCACCACCAACTTTACCGAAATACACGTCGAGTTTTAA  
TGCCGGTTGGAATGGCAGCGGCACAACCGAACGATTAAGCAGAGATCGCGAAGTCGG  
AGGTAGTTACAGGCTGGCAAGCCTTGACAGACTTGCCCTCAGGCAGAGGATATTGGAC  
GGGGAAAAAACGAATGGTGACACCACGTCGATACAGGCGAAGCGCGAGCTGTTCTTC  
AAAGGCGATAACGCCGGAATAATATCGTCTCCATCTGTGCCATCGGTCCCGCCTCCACA  
ACCTCCGTCGCAGGCCCCGACGTCGATGAGCACATCGTCGACGAGCACGTCGTCGAC  
GACGACCACGACAACCACAACACTTGCTTCGCCTAACACAGCACCGCCAACCTCTTCG  
ACCGTGTACACAAGCGTCACATCGTCGGCGCCTACCTCGAAGCCACGATTACCTCCGT  
CCACGGTGATCTTAAATCAAAACGATGCATCAGAGGACAGTAATAAACGGGAGTCGAA  
TCGAAATAGCGAGAACAAGGAGGCTGCTGTCCTTCATCATCCGCGACCAACGCCGCCG  
ACCAAGCCCAAAGAAGTTCGATGGTTATGTGGGATTCGCAAATCTACCCAACCAAGTTTA  
TAGAAAGGCTGTAAAGAAAGGATTCGATTTTACTCTGATGGTCGTCGGTGAATCAGGA  
CTAGGAAAATCAACCTTGATCAATTCAATGTTCTCGCCGATATATATAGTGCCGAATAT

CCTGGCCCTAGCCTTAGAGTTAAAAAACTGTAGCCGTAGAGACTAGTAAAGTATTGTT  
AAAAGAGAATGGTGTGAATCTTACTCTGACTGTTGTTGATACACCTGGATTTGGTGATG  
CAGTCGATAACAGCAATTGTTGGGTACCAGTAATCGAATATATTGAATCCAAATATGAG  
GAGTTCCTGAATGCCGAGTCTCGTGTTGTGAGACGACAGATTCCAGACAGTCGAGTAC  
ACTGTTGTCTCTACTTCGTCGCTCCTTCAGGGCATGGCTTAAAGCCGTTGGATGTAGAG  
TTCATGCAACGTCTTCACGACAAAGTTAACATTATACCTGTCATCGCGAAGGCGGATAC  
CATGACGCCAGATGAATGTGCTCATTTTAAGAAACAGATTTTGAACGAAATAGCACAA  
CATAAGATAAAAATCTACGAATTTCCAGAGGTAGAAGAAGAAGAGGAAAGTAAATTGC  
ATAAAGTTCTTAGAGAAAGAGTACCGTTTGCGGTAGTGGGTGCAAATACCGTAGTCGA  
ACATGACGGTAGGAAAGTTTCGTGGAAGGAAGTATCCTTGGGGAATCGCAGAAGTGGA  
AAATTTGGAGCATTGTGACTTCATAGCATTACGAAATATGGTTATTAGAACACACTTACA  
AGATCTAAAAGATGTTACAAATAACGTACATTATGAAAATTTTCGATGTCGCACGTTAG  
CAGGTGTTGGAGTGGATGGGAAACCAACAAAAGTTTCGAATAATTTGTGCCCTCCAGG  
AGTGATGAACAGTTTCATGACAGTATGGAATCCACTAGCTCAATTGGAAGAAGAAAAA  
AGAGAACATGATAATAAAATGAAAAAAATGGAAATTGATATGGAACAAGTATTTGAAAT  
GAAAGTTAGAGAAAAGAAGCAAAAACCTTAAAGATTTCAGAAGCAGATTTACAAAGAAG  
GCACGAACAAATGCGACGTTCTTTGGAGCAACAAGTACGTGAATTAGAAGAAAAGAG  
ACGAGCATTTGAGGCTGAAAAGTTAGCATGGGAACAACAACAACTGGTTCACAGTATTGA  
AGAATTGCGTAGGCGCAGCCTAGAAGCAAATTCAAAAGA

>novel\_circ\_000802

GTACACGAGATCCATTTCCACCAGCTAGAGCAGCGAGTATTTTAGCATTAGCTGCTACA  
CAGCAATATTTTTATTACAAGAAGTTGCAAACCGTATTTTACCAGCATTATGTCCACTT  
ACTACAGATGTAGATAAAGGAGTTAGAGATAATGCATTTCGAACTATCCGTGGATTTTA  
TCCAAGCTTGAAAGA

>novel\_circ\_000803

GAATTAGCCTACAAACAACGTGAAAAAGATAAAAAAGAAGATTATTGGGAATTAGTA  
ATAATAAACCAAAATGGATTCCACGGGACAATTTGCACCGACGCGTATTGGTGAACAT  
ATCAAACCAGTACAAAATGCACGTTATGAAGCTTACCAAATGCGTATTCATGGTCA

>novel\_circ\_000804

GAAGAGATGGAAGTTCGTCCTCGAATTTCCACGCTGCTCAACAGCCTGTCGGACTACA  
GCAACACGATTCCAGCTGCGACCGACCCGGATGCGAAACCTCCACCCGTGCAAGGTG  
GTGCACGAATGGGCACTTTGATCGGTGTCTTCCTACCTTGCATCCAAAACATCTTTGGC  
GTGATTCTATTCATTCGTTTGACCTGGGTCGTTGGCACCGCTGGAGCTTTTCAGGGATT  
CTTCATCGTGTTATGTTGTTGTTGCGTGACGATGCTGACAGCTATCAGTATGAGTGCCAT  
CGCGACTAATGGCGTTGTACCAGCTGGAGGGTCTTACTTCATGATATCCAGAAGTTTGG  
GTCCAGAATTCGGTGGTGCCGTAGGAATGCTCTTCTATACGGGTACTACACTAGCTGCT  
GCTATGTATATCATCGGTGCTGTTGAAATTGTTCTGACTTACATGGCGCCATCGCTTAGT  
ATATTTGGAGACTTTACAAAAGACCCTAACATCATGTATAATAACTTTTCGCGTGTATGGT  
ACTGGATTGCTTATGGTAATGGGCACCATCGTATTCATTGGCGTGAAATTCGTCAACAA  
ATTTGCGACGGTCGCTCTAGCTTGTGTCATCTTTCTATCGTGGCTGTCTACGTAGGGTT  
ATTCTATAACTTTAATGGCAACGAATCTCTCAAGATGTGTGTTCTTGAAGGAGATTGTT

AAAAGATATCAACGTACTTACCGAATGTAATAAGAATACTAGTGGAATTCTTCATCAACT  
TTACTGTGGAAACACAACCACTAGCAAATGTGATCCTTATTATATGGAAAACGATGTGA  
CTATTATAAACGGAATTCGTGGATTGGCTAGTGGTGTATTTTAGACAATATATGGGACA  
GCTTTCAAGAAGAAGGCCAATTGATTGCCTATGGAAGAGATCCCAAGGATATTGACAT  
GATGTCCAATTCTTCCTTCAATCAAATTCAAGTCGATCTTACCACTACCTTCACCATTCT  
TATTGGTATTTTCTTCCCTTCAGTCACAGGAATCATGGCTGGCTCCAATAGATCAGGTGA  
CTTAGCAGATGCCCAAAAATCTATTCCCTATTGGTACTATTTGTGCAATTTTGACAACCTC  
AACAGTATATCTCTCCAGTGTTTTACTCTTTGCTGGTACAGTGGACAATCTTCTGCTTCG  
AGATAAGTTTGGCCAAAGTATTGGTGGCAAACCTGGTAGTAGCGAATATGGCTTGGCCTA  
ATCAATGGGTTCATCTTGATTGGATCTTTCCTGTCCACTCTTGGTGGTGGACTTCAATCTT  
TAACAGGCGCTCCACGATTACTCCAAGCTATCGCTAAGGACAGTATCATTCCCTTTCTTA  
ACTCCATTCGCCACCAGTTCGAGTCGAGGAGAACCTACAAGGGCTCTAGTATTGACAG  
TAATCATCTGCCAGTGTGGTATTCTTCTTGGCAATGTTGATTATCTGGCTCCCTTGTTATC  
AATGTTCTTTCTCATGTGTTACGGCTTTGTAAACCTGGCTTGTGCTCTGCAGACTCTTCT  
CAGAACACCCAACTGGCGACCAAGATTCAAATACTATCATTGGAGCCTTTCTTTTCTCG  
GTCTGTCCCTCTGCATCGCCATCATGTTTCATGACAAGCTGGTATTACGCTTTATTGGCCA  
TGGAATGGCTGGCTGTATTTACAAATACATTGAATACCGTGGTGTGAGAAAGAATGG  
GGTGATGGTATTCGTGGTCTAGCTCTGTTCAGCCGCTCGTTACTCTCTTTTGAGACTGGA  
AGAAGGACCACCTCACACAAAGAACTGGCGACCACAAATTCTCATCTTGGCTAAACTG  
ACAGACGATCTGGTACCCAAATATCGCAAATTATTCGCATTGCTAGTCAATTGAAGGC  
TGGAAGAGGTTTGACAATCTGTGTCAGCTGCATCGGTGGTGGTATTACATTCAGAACACT  
GGCAAGACTTTGGCCGCAAAAGTGAATTTGCGCAAGACAATCGCAGAGGAAAAAGTA  
AAAGGATTTCGTAGATGTCTTAGTGGCTAAGGATGTCGTCGATGGCCTCTGTTCCCTGAT  
TCAAACAACCGGATTAGGTGGCATGAAACCTAACACTGTGATTCTTGGCTGGCCCTATA  
GCTGGAAACAATCACAAGAGGAAAGAAATTGGAGGGGATTCTTACAGACTGTCAGAG  
CAGTTGCCGCAGCCAGGATGGCTCTTTTGGTACCTAAAGGAATCAACTTCTTCCCTGAT  
TCAACTGAAAAAGTTGTGGGAAATATCGATGTCTGGTGGATTGTACACGATGGCGGTC  
TTCTGATGCTGTTGCCATTCTTGCTGAAGCAACATCGCACATGGAAGAATTGCAAAATG  
AGGATCTTCACAGTTGCCAGATGGAGGATAATTCTATTTCAGATGAAGAAGGATTTGAA  
GAAATTCCTATACGATCTGAGAATCGAGGCTGAAGTGGAGATTGTGGAAATGATGGATT  
CAGACATATCCGCGTACACTTATGAGAGAACTTTGATGATGGAGCAGAGGAACCAGAT  
GTTGAGGGAGTTGCGACTAAACAAGAAGGAATCCCTAGGAGTG

>novel\_circ\_000805

GTGGACACAAGGAGTTCCACAGGCGGCACAGGGACCTCTGCGAGGATACGCTTCTCC  
CAACAGTGGGAGCGGGTCCGTCCGCTGTCCGCAGTTGTTCCAGTCCAGGACCAGGGT  
GTCCAGTATTAAGTCTGTCCGACCACCGACCCCGCAACCCGCGGACATCGATAGCCA  
CCCAGCCTCGAGAGTTCTACCGTTCCCTCTACCTTGGAATGGAAGAGACGCGGCCGAC  
TTGCAACTTCTTCGCGCGTTGGGCGCGACCAGAGTCCTCAATGTCACCTTCACAGCTGC  
CCGGATATCACGAGGAGAGGGGTATCACGTACAGACAGATCCCTGCCTCGGATTCTGG  
CCACCAAAACCTTAAACAGTACTTCGAGGAGGCGTTGACTTCATCG

>novel\_circ\_000806

CGTCCGGGCGCGTCTGGACGCGACGACGACGACGACGACGACGACGGGCGAAGCTAGG

GGCGGCCCCGGCGTGCACGGGCCGGCAACACCACCACCACCACCACCACCATCATCAC  
CAGATCGAGCACGAGCTTCAGCCATCGTCGGCGATGTCCACCCTGGTCTGCTGCGAGC  
CGGTCTCGGGCCGCGGCCCGTTCCCGCGACAACCTGAAACTCGTCCTGAATCGGAGCCT  
GAGCGAGCCCGGCCCCAGCGCGGGCGGGCCGGCGCGTCCGCCGCCTTCCTGTCCGC  
CGCCCCCTCGCCCCCCCCGAGCGCCGGGCTGCCCCCGGCGGGGGGACGCCTGCCC  
CGCGCCCGACGAGTGCGCCGACTGCGCCTCCGCCGACCCCTGCTCCACCACCGCCAT  
TGCCACCACCACCTCCACCACCACCACCACCTCCACCACCAACACCTCCTCCACCACC  
AGTCGTCGAAACGCTGCAAGCTGGAGACGGTCAGCCTGCCGACCAGCCCCTCGTCCG  
AGACCAACACCCTCCAACGCCAGCTGGTCCTCCAGAGGACCAACGCGATAACCGCCG  
ATCAGTTGGCCGACCGGCTTCGATCCTCCTCACGCGAGGGGAACGGGGGTGCGTCGA  
GCGTGGTGCTCGACTGCCGCCCTTCATACTGTACAACGTGAACCACGTGAGGGGGGC  
GATCAACGTGAACTGCTCAGATCGGTTCAACAGGAGGAGGCTTCAACTCGGGAAGGC  
GGCCCTCGCCGATCTCGCCAACACCAGGGAAGGGAAGGAGTTGCTGCGCAGGAGGCA  
TTACAGGGAGGTGGTCTCTACGACGATTGCACCGACGACGTCGACCGCCTCCCCGTC  
CAGCATCCCCTCTTCCTCGTGCTCGTCGCGTTGCTGGACGACAACAGGGAGCCTGCTC  
TTCTCTTGG

>novel\_circ\_000808

ATGGAGCATAGAGGCGCGGCGTCGGATCGGCAGTAGCGGCACCCTATCGGCCGGAGGC  
GGAGGGATCGGACGCGAGAGAGGCGGCGTTGTAGCGCGGCGATGGCCGCGACCGACG  
GTCAGATCGTGTTGCGGCGGCGCGGTGGGCCGAGGAGGCGACCTACCTCCGCGAGT  
TCGTCTCCAAGTATCGTCTGCCCCGCGGTGATCAAGATCACGAAGGGCCAGTACGGGGG  
GCTGGGGGTGCCCCACCCTGCCGCGCCCCAGCCTGCAGAGCACTGCCCTCCTCGTGTCG  
GCCGGCAGGCGGGCGCAAGATCGTCGCCAGGCGGTGAAGATCAAGGAGGGGAGGAG  
GGTGGTCGGGGTGGGGCCGAGGCTCGCCATCCCCGACTCGTACGCCGGCTACTTCGAG  
ATACTGAGCGAGGAGGGGAGGGCGGTGCGCGGGATAGAGTCGGTGAACGAGCTGTCC  
CGCCGTTGCCCCGAGGAGGGCGCCCTGGTGCGGGAGACGGTGCGCGGCATAGCGTGC  
AGGGTGACGACGAGTCGGGGCTGGTGGTCCCGAGGGGACCAGGACCCTGGCCGC  
GGGCGAGACGATCGTCACCGCGGGCGAGGTGACTCTGCCCGGCCGCGGCAGATTCCT  
CCGTTGCGTGGAAGTGTGCGGGGGGAGAGCGTGCTGCTCGGGATGGATCAGCGGGGCCG  
TTTCAGCGCGGTGGCGCGCGAGGACAACATAAGCGGCGTGACACGGCCCCGCGCGTT  
GCTCAGCAAGCGTCTGCCGCTGACGGTGCGGCTGGTGCACGGGCAGCCGCCGAGGGG  
GTTGAAGTCGTCGTCGCAAGTTCGTGCCCCGAGCTCAGGCTGCTGTCCACGTTTCGAGGAG  
GAGCACGTGTTGCGGTTGCCGTTGCAGCGAGAGGGGGCGGCGGTGGCGCTGCCGCTG  
GCCGCGCCGCTCAAGCTGGTCAAGGCGAGGAACGAGGAGGCGCTGAGGTCGATGCA  
GGAGTTCGGCAGGCTGGTGGAGCGGGCGTCGCGGCTGGTGGCCGACGTGGCGGACCG  
GGCCACGTGCTGGACGGGCGGCTGGGCGAGAGCAAGCAGGCGGCCAGGCAGACGA  
GAGGCGGGTCGGGTTTCCTGAGGCGGTCTCGGCCGCCACCTCGGACAACAACGGGC  
CCCTTCCTCACCACAGGAGCAACGCGGCCACCCACCACCACCACCACCACCACCTA  
TCACAGCAACGGCCAGCAGCAGCAGCAACAGCAGCAGCAACAGCAACAGCAGC  
AGCAGCAGCCGCCCTCGTCCGGCTACGCGAGGGACGAGAATCGCGTGCCGCCCTCGG  
CGTGACCGAGGAGTACGACGAGATCGATCAGATTTACGACTACGTGCGGGGTTTCGC  
CCCGCTGCCGAAGAGCGTGAGGTCCCCTTACGAGAGCCCCTGCCGACGGCGGGGTC  
GTCCAGCCCCGCCCTCACCCCCGTCACCGTCACCGTCGCGCCACTGCTCGACGACAGA

CCGGAACCGCCGCCCATCGAGACGATACCGACCAAGAAGATCCAGGCCGAGAAGAGG  
ACGAGGCGCGCCGTGAAGGAGGCGCCGCAGCCGAGGGCCGAGAAGCCACCCCTGGC  
CAAGCTTTACGTGAAGAACAGCGGCACCCAGAGGGGGCGCCCCCTCATGAGGCAGAA  
GAGCGCGTCCCCTCTGAAGGAGACCCCGCCCGGTACAAGGGGGGCTCCCCCTTTTC  
AACATCAGATACAAGAGCTTGACGAACCTGCAACAGGCCATGGAGCTCGACGGGACC  
CTCGACTCGAGCCACTCGGGGGGCAGAACCTCGGGCGACTCTGGTGCTGGTGCTAAG  
CTGCCCCGAAAAGAGATCGAGGCGTCTGAGCAGACCGCGCTCGTTGACGAATTTAGTGT  
GGGAGCTGCGCGGCGGAAGCGGCCTCGGCTGCGCGAGGCCGGAACCCCGCCGCCG  
GCCACCGCCGCACCGCTGCCCCCACCAAATGCGGACCACGTCTGGCCGTCACCGTG  
GTGGCACCCCGACGCGTTAGCACGCTCTACCTCTAACTC

>novel\_circ\_000809

GATCAAGCGAGAGCGGTATCCACGTAAAAGTCGAGGATGTGGAAAGAAGAGGGCTTA  
GCATGAACCAACACGCGGCTACGTTTACAGAGTGTGATACTGATCCTGTTGATCCTCGGT  
GATCTCGAATCGGTCACGGTGGTGAACCATCATCCAGACGAGGAATATTACCTGGAGC  
ATGAAGTCCTCCACGAGGAGGCGATTAACGAGGCGAAAAAGTTGCACCTCTATCCCGG  
ACCAATCCCAGGATGCAAGGCTTGTACGAATACAGAGATGACATACTGCAAAGATGGA  
AGTGTGATAAACGATCATTGTTGTTGCGATGGCAGCGTTAACG

>novel\_circ\_000810

GAAGTGAGAGTCCAGTTTTTTGGTCTGGAAGGTGGAACAGGTACAGGTGGTGGGACTT  
CCTTGAGACTCGCATCGCATGAATTGCCTAATGAAATTTCTGCTCCATACGAAGTTCCA  
CAATTTCCAATTGAACAAATTGAGAAAAAGCTTTTGATACAAAGACAATTAACCGTCA  
AATAGTATCGAAGTAAATGAAACGGAAGGTTACGTTGACGGAATTAACATATAGATT  
ACATTGCTGTACACATATATGTATACATAGTATATAAGTAGCCAGAAACAATGTGGTTGC  
GACGTGACAATAGTGCTACGCAGCATGGTAGTGCGCGGTAGTGATAGGCGAGACGGC  
GAAGGGGTGGCTCTCACGGTCGGCCGTTTACGTAGTCGTGCAACCATCGAGGAGGGAG  
GAAGTTTTTCGCCGGTATGCACTGCGTGCAATGTAGATCGTTTCCGGTCCACCACGAAG  
AAATATCACACTCGTGTTGGACGACCGCATGATCCCCTGGCTTGGCTTTACGATAGCCT  
TTCATGACCTCGCCACGAGCATTTCCGAGGCCAGGCTATCGTGATGCAACAGACGTA  
AAATACAAGACAAGGAACGTGTAACATGTTTCGCCGGTGCGAACGAGTCGAAACGATG  
GCTCAGGGATAATAGGATACTCTTGAGAGCTGCCAAGGATTTAGAAGAACGTCGTAGC  
CATTATGAACCATCACTCGGACCTGGTATACCAGATGATGTCGATCATCACTTTAATCTC  
GAAGAAAATGATTTTGTCCCACACTTTCAGAGGGTATCCATATCTGGTGAAGATACTTC  
CGGG

>novel\_circ\_000811

AAAAAAGTAAAAAAACTGGCCGAGCTAAGAGACGTATTCAGTATAATCGAAGATT  
TGTTAATGTTGTTCAAACCTTATAGTCGTCGTCGAGGACCGAATGCTAACTCAAATTCATA  
ATTGTATCTATATGTATACATTTTCATGGTTATGAAAATAAAATAAAAAATTAA

>novel\_circ\_000812

AAAAAAGTAAAAAAACTGGCCGAGCTAAGAGACGTATTCAGTATAATCGAAGATT  
TGTTAATGTTGTTCAAACCTTATAGTCGTCGTCGAGGACCGAATGCTAACTCAAATTCATA

ATTGTATCTATATGTATACATTTTCATGGTTATGAAAATAAAATAAAAAATTAAATATAAA

>novel\_circ\_000813

AAAAAAGTAAAAAATAAACTGGCCGAGCTAAGAGACGTATTCAGTATAATCGAAGATT  
TGTTAATGTTGTTCAAACCTTATAGTCGTCGTCGAGGACCGAATGCTAACTCAAATTCATA  
ATTGTATCTATATGTATACATTTTCATGGTTATGAAAATAAAATAAAAAATTAAATATAAAG  
AA

>novel\_circ\_000814

TAAAAAATAAACTGGCCGAGCTAAGAGACGTATTCAGTATAATCGAAGATTTGTTAATG  
TTGTTCAAACCTTATAGTCGTCGTCGAGGACCGAATGCTAACTCAAATTCATAATTGTATC  
TATATGTATACATTTTCATGGTTATGAAAATAAAATAAAAAATTAAATATAAAGAA

>novel\_circ\_000815

AAAAAATAAACTGGCCGAGCTAAGAGACGTATTCAGTATAATCGAAGATTTGTTAATG  
TTGTTCAAACCTTATAGTCGTCGTCGAGGACCGAATGCTAACTCAAATTCATAATTGTATC  
TATATGTATACATTTTCATGGTTATGAAAATAAAATAAAAAATTAAA

>novel\_circ\_000817

GAGCAACGAGAAAAGGAAGGAGAAGTCTCGCGACGCTGCTAGATACCGTCGAAGCA  
AGGAGACGGACATTTTCACGGATCTGGCCGCCGCTCTTCCCGTAACACCGGAACAGGC  
AGCTCATTTAGATAAGGCGAGCGTTATGAGGCTTGCCATCGCCTATCTTAAAGTGCGCT  
CTGTGGTGCAGCTGTATTCCAGGCCCCGATGACCAAGTCCGAGACGTTGAATCAAATGGA  
CGAATTATTTTCCAAAGCTCTAAATGGATTTCATGCTGGTGCTTTCCAGCGATGGAAATAT  
GATCTACCTGTCGGAGAATGTGAGCGATTATCTCGGCATTTCAGATGGATATGATGG  
GCCAAAGCGTGTACGAGTACAGCCATCCGTGCGATCACGAGGAATTGCGGGAATGCCT  
GTCCTCGAAACCGCTCGAGAACAGCGAGAAACGTGCTTGCAGTTTTTTCTTACGGCTT  
AAGTGTACGTTGACCAGCAAAGGAAGGAAGGTCAATCTAAAAAGCGCTTCCTACAAG  
GTGATTCATTGTACCGGTAGATTAACGTATATCCGCGATCCGGTATCGAATTCGTGCGAC  
AACGACGAAACGAGAAATAAAAAGGACGAGGAGGGGAATGAACGGGACACCGGTGC  
CTCGCTAGTGCTTTTGGGATGTCCCATACCGCATCCTAGCAACATTGAGATACCGTTGG  
GACGTCACACTTTCCTCTCCAAGCATAGCCTCAGCATGAAGTTCACGTACGCCGACGA  
AAAGTTGGCCGAGTATCTGGGTTGGAACAGCGAAGAGTTAGTGGGACAATCCGTTTTTC  
GAGTTCTATCACGCCCTCGACAATTTGGCTCTGGATAAATCTTTCAAATCAC

>novel\_circ\_000818

GAGCAACGAGAAAAGGAAGGAGAAGTCTCGCGACGCTGCTAGATACCGTCGAAGCA  
AGGAGACGGACATTTTCACGGATCTGGCCGCCGCTCTTCCCGTAACACCGGAACAGGC  
AGCTCATTTAGATAAGGCGAGCGTTATGAGGCTTGCCATCGCCTATCTTAAAGTGCGCT  
CTGTGGTGCAGCTGTATTCCAGGCCCCGATGACCAAGTCCGAGACGTTGAATCAAATGGA  
CGAATTATTTTCCAAAGCTCTAAATGGATTTCATGCTGGTGCTTTCCAGCGATGGAAATAT  
GATCTACCTGTCGGAGAATGTGAGCGATTATCTCGGCATTTCAGATGGATATGATGG  
GCCAAAGCGTGTACGAGTACAGCCATCCGTGCGATCACGAGGAATTGCGGGAATGCCT  
GTCCTCGAAACCGCTCGAGAACAGCGAGAAACGTGCTTGCAGTTTTTTCTTACGGCTT



AAGTGTACGTTGACCAGCAAAGGAAGGAAGGTCAATCTAAAAAGCGCTTCCTACAAG  
GTGATTCATTGTACCGGTAGATTAACGTATATCCGCGATCCGGTATCGAATTCGTCCGAC  
AACGACGAAACGAGAAATAAAAAGGACGAGGAGGGGAATGAACGGGACACCGGTGC  
CTCGCTAGTGCTTTTGGGATGTCCCATACCGCATCCTAGCAACATTGAGATACCGTTGG  
GACGTCACACTTTCCTCTCCAAGCATAGCCTCAGCATGAAGTTCACGTACGCCGACGA  
AAAGTTGGCCGAGTATCTGGGTTGGAACAGCGAAGAGTTAGTGGGACAATCCGTTTTTC  
GAGTTCTATCACGCCCTCGACAATTTGGCTCTGGATAAATCTTTCAAATCACTGTTTCAG  
CAAGGGTCAGTGCAGACGGTGGCCTACAGATTTCTGGGCAAACGTGGAGGATACGC  
TTGGGTCGTGACGCAAGCCACTCTAATTCAGTGTCCAAGCAGCAGAAACCGTTGTCC  
GTCGTCTGTGTGAATTACATTCTAAG

>novel\_circ\_000819

CGGTGTGGAACGCGAGGATGAGGTGTACAGCGCGCTCAGCTCGCAGCACGTGACAC  
CGAGAAGGCCGTGAAGCCGGAGCAGCCGGCCGATCCCATCCTCGTCGAGCCTCTGCT  
CACGACCAAGCTTCGTCTCCGCGTCCAAGTGAACAATAACAATAACAATAATAATA  
ACAACAAGAGTAACAAGAGTAACCTGGAGGAAGCTACGTTGGACGGAAACGAGGAA  
CGGTTCTCCCTGCAACCGGAAGTCGATTCGTTGGATCGCGCGAAACCGTTGACGGTGA  
CGAGCTCGACTTTCCGCGCGGCGGACAACAAGCCGAGGAGGGCGCAGGACGGCTCG  
CGGAAGGATAACACCTTCCCGAGACCGGTCCAATCTACGTCGGAGAAATCGTTGCGCG  
GTGTCCAAGCGTTGAAACAATCCCTCGAGGAGTCGATCAAGGAGAACACGAGCCGA  
GAAAGAAGCAGCAGTGTGCGCGTGCTCCGTTTCAGTTCCAGGGTAAACCAGCGCTGG  
AATACGATCCGGAGACCGCTGTTGCGCAGGACAGACCGCACGTGGTTACCAGACACTT  
GTTTCGATCCATTGCCACTCAGCAGCAGCAGCAGCAGCAGGAACAGCAGATCACTTGC  
AGGCCACCGCCGAAACAGCGACTGCGAGTATCTTCGCACCTCGCACCGAGGACATG  
AACAAAGGCTTCTTGACTTTCAGCGAGGATCATCCAGGCCTTACCATGCTGAAGGACG  
AGCCGGAGGATCTGACGCATCTGGCGCCAACACCTGGCGACGTGTGCGTCCCCCTCGA  
GGACACGCCTTTCCTCTCGGAGATGCTCGACGAGTTTATCCTGAGCAGCGACAACCTATT  
GCCCCCTGCTCAGCCCGGGCGGGCCGTTGGCCCCCGAGTTGCGGTCCACGGATTTTCGG  
CGACCCCCCTCAAGGACGCCGAGTTGGCCGACACCCCGAGAGGCAAGGATCTCGGGGA  
GTCGTTGGCCGACAGCGACCCGTTTCATGTACGGCGACTCGCCGAGCAGCCCTTGCAGC  
ATCGATCCGAGCGCCGTCTCGCCGAGCTCGCCAACAAGTATCGTCGAAGCCCGGAGA  
GAAGCATAGACTCGTTGGGCAGCCCGACGGGCGGAAGCGGTGCCGACGGTTTGTCCG  
AGGACGAGATGTTGATGCTTGGGCTGAACGACAGCATGGCCGACGACGAGCTGGAGT  
TGAGGGCCCCGTACATAACCGATGTCGGATCAGGACGAGGCGTTGGATCTGCTCATCAG  
CAACGATATGGTGATGTGGAGCCCGCCACAGACCACGGATCAGAAGAACGGTTTGAAA  
TGATGTTGGCGGAGAAGGAGCAACGAACGTCCGATTCCAGTTTGGCGCAACTGTTG  
AAAACGGATCAGGTCGTCTCGAGAAAGTACAACGACCACGGTGGGGGTTTGGTGAAT  
CCGGTCCAAGTTCTCGGCCAGATCCCTAGAAAAAATATAAATCTAGATAACTGCCATTG  
GTCCTCCAAAGTGGACAGACCAACGAAGCGTATTCACACTGCCTCGATAGACGTAGGG  
AACGACAATAAACGTATCAAGTGCGACGAGTCGACGAAACGCAGCTGCCATCTGGAG  
GATCATCTGTTGACCAAACAACAGCAACCGTCTTCGAGGAAATGCTCGTCGAACGGCA  
ACAACAGTCAACTGCTGCGCCGCCTGGTGTGCGATCAAACTCTCCGCGAAATAATAA  
CAATTTGCGCAACGAGTCGTTGAGGGGACTGCGAACGGTCGGCAGAGCGCGAGTAG  
GATAGACTCGGAGCTGGACGCGGCGCAGGACGGGGAAGGAGACGGGGGCGGCGGCG

ACGGGGGCGACGGCGGCGGAAGGATGGAGGAGGGGAGGAAGGAGAGCGGAGGAAG  
GTGTGGCCGGAACGGCAGCAGCGCCGCGGAGAGCGGCGCAGATACGATCGGTCAGAT  
GCCGCGAGCGGAATCCAGCGTGCAACAGCGTGCTAATGAATCTCCTGGTATCCGGCTGC  
GAT

>novel\_circ\_000820

AACAACCTGGACAGAATCGAGGAGGGTATGGACCAAATCAACGCCGACATGCGCGAGG  
CCGAGAAAAATCTCACGGGAATGGAAAAGTGCTGCGGCCTCTGCGTTCTTCCATGCAA  
CAAAGGCGCGAGCTTCAAGGAGGACGAAGGGACGTGGAAAGGAAACGACGACGGTA  
AGGTGGTGAACAACCAACCCCAACGGGTGATGGACGATCGCAACGGGGCTCGGCCCGC  
AGGGCGGTTATATCGCCAAGATCACGAACGATGCCCCTGAGACGGAGATGGAGGAGA  
ATATGGGCCAGGTGAACACGATGATCGGTAATCTGAGAAACATGGCGATCGATATGGGT  
AGCGAGCTGGAGAATCAGAATCGGCAAATCGACAGGATCAATCGCAAG

>novel\_circ\_000822

GTTTGTATGATGCCCCGGTGGCGGCACCGAAAATATGATTGGAAATAATAGGACTATGGC  
GAACATTAAACAAGAGATCGAAAATCCTACGACGCCCACGCAAAATTATCAAGTTTGT  
TCACCGACCACCACGCTTCAGCATCAAGAGGTGATTTGCAGTAAGATAGAAGTTCCGC  
CCGATTATGGCGGAGGCGAAGGTAGCCCTGGAAGTCCGGAAATGCACCATTGTTCCCTC  
AACCCTCAGCCTTTGGGGACATCAGAGGAAGGTGTCAAAGAGGAAGACATGATACC  
CAGAAGGCTTTGCCTAGTCTGCGGTGATGTTGCAAGTGGATTTTATTACGGGGTTGCAT  
CTTGCGAGGCGTGTAAGCTTTCTTCAAAAAGAACCATAACAAGCGAGTAATTTTACAGG  
TAATATCGAGTACACGTGTCCCGCGAATGGGGAGTGTGAGATAAATAAACGGAGGAGG  
AAAGCGTGTCAGGCATGTAGGTTTCAAAAGTGTCTTAGACAAGGCATGTAAAGGAGG  
GGGTCCGATTGGATCGTGTCCGAGGTGGGAGGCAAAAATACAGAAGGTCCACCGATCC  
CTATACACCTGTGAAACCAGCTCCCCTGGAAG

>novel\_circ\_000824

GATACACAGCTAGAGTAGAATTTGCCTTAAAACTTGGTTATACAGAACGTTTAGTTCAA  
ACTGCACTGGAAAAATTAGGTCCAGATCCAGAACAAAATGAACTTTTAGCTGAATTGA  
TAAAATTGGGTGCTAGCTGTTCTCAAAAATCAGTTGATACTTCAGAAGAATCTGATAGT  
GTTGTAGATTCTGATTTAGCAACTACTGAAAATAGTGGATGTAGTCTCAGATCCGTTGT  
GATCGATGGAAGTAATGTGGCAATGAGCCATGGAAATAAGGAAATATTTTCTGTAGAG  
GAATCAAAATTTGTGTAGATTGGTTTAAATCAAGGGGACATAAAGAAATTACTGTATTT  
GTGCCTAAATGGAGAAAGGAAACTTCTAGGATTGATAATCCAATCGCCGATCAAGAAA  
TTTTAGGAGAATTAGAAAGGGATCGTTTATTGGTTTTTACTCCATCCAGATTAGTTGGTG  
GCAAAAGAATGGTTTGTATGATGATCGTTATATTTTGAACTTGCAGCAGAAATTGAT  
GGCATTGTTGTTAGCAATGATAATTATAGAGATTTAGCACAAAGAAAATCCAGAATTTG  
AAAAGTTGTAGAAGAAAGAATTTTAATGTATACTTTTGTAATGATCGTTTTATGCCACC  
AGATGATCCATTGGGTAGAAAGTGGTCCAACTTTAGATAATTTTTTGAGAATTTTTCTAA  
AAAGTCTGATCCAGCACCACTTGTCCATATGCAAAAAAATGTACATATGGAAATAAAT  
GTAAGTTTCGCCATCCAGAAAGAGGTCCTCATCCTCAAAAGTCAGTCACAGAAAACT  
AGTAGAACATGTACAAAAACAACCTCAAGTAAGAGATTCAAATTTAAATATTTTTTTT  
TCAATTTTTTAATACATTAACAAATGTATTTAGCATCAACCACTTTGTAAAACCAAATC

```
>novel_circ_000825
```

```
>novel circ 000826
```

TCGTCCTCGCTCTCTCTCGTCGTCGCGAGAGATAGCTCGAGAGGCCAAGGAGGAGGA  
GGAGGAGGAGGGCGTCGAAGGGGGGAAGAATGGAGGACGGGAGCCGCGAACGGCA  
ACAGCCCCCTGCTCCGTTTCGATCAACAACGTGCACAGATCGTTTCGTTAAGTTCGTGAAC  
AGGACGCTGCACAACGTGGTCTCTGTACTGGATCGATTACCAGGGCCAGGCGGTGAGCT  
ACGGCGCCCTGTTCGCCGGGCGATTGCCTCGATATCGACACGTTTCGTACCCATCCGTGG  
ATCTTCGTTCGACCAGGAGACCAGGGACAGGTAGGCGGGGAGGCGAGAGACCCCTCCAA  
AAATTCCAAATTCTTCAAACGATCGTTGTCTGTTGTTCGGGGGTTGCCTGGTTCCTCGATT  
TCTTCTTCTTAAATTGTGGGGCGAAGGGATCGTTTCGTAGGATTAATCAAACATTGTGC  
CCCCCTCCCTTTTCTTCGTTTCGAGGACGAAGAAAAAGAAAGTTTCGAACCCTTTGCGC  
TCCAATCTCGATTTCGACGCGGCGATATTTATCTATTTACGTTTCGATTCTTTTGAAATAAAG  
CTTCGTGTAGATTGCTAAGCCTTTTACGTGCAATCTCACGAAGCATGGAATATAATATAC  
TTATCTACATTTTTTGGCGTTGGGCCAAGTTTGACGGTCAGTGGGAATAGAAATATTATTT  
TTATTTTCGAGTTTTTATAAACATGGTAATGAAATTAATTCGAGCGAGGATAAGCTTCTTC  
TTCTTTTATTGAATAACGAAATTATTTTTATTTCGTAAAGAAATCAATGATAGAGAGAAGA  
AAAATAAAGATGTAATATAGAATGAATAAAAGATTATAAGAATATAAACTTTAAAATTTCG  
ATAAATTTTCTTTCATTACGCGCTTTAAAAATACACAAAATATTAGAATACAAAAGTTTC  
GTACGTTGATTTCGCGCGTGAAATCATTTTAAAGAGCGAACGGGTGGGGGAAAGTCACGT  
GGTGTGTTGTTGGTTCGGTCGAGCGAGAAAGGCCTGGAGCGCAAAGGTTTAAACGTATTTCG  
CGGAGAATCGTTGGTAAAAATATCGGTTTACATTCTCTCTCTCTCTCCTTCTCTCCCAAT  
CCTGCTCGCTTAAATATCAAAGTGACCCTTTGTACTCGAGAAGTGGCTCTCTGCCAACT  
CGAACAATCTTTGCCATTGGTCCCAGTTTATAAGCGGCGATAGAAATATTATTTTCGATA  
TTTTTCAGTTTCGTAAGCGTAGAACATGGCGATGATTGGTGTTCGAGCGATAGAGGGAA  
GGAAAGCGTGAAGAAAAAGACGAGAAATAAGAAATAATTGAACAATGAATGAGAGAG  
CATGTTGTGTTGACGTTTTACGTTAAACGCATTGCGTACGGCACTCTGTTTCGCTTTTCGA  
GCGCTCTAAAAAAAGTATACCATGCGTATATGCACTTTTTTAATACCCACGTTTATAAAGT  
GTTCTTAAATATTATTATATATATTTTTTTATACATTTATTTATCACGTAAGCTTTTTTTTACATT  
TTAACTATTATTTATTATACAAATAAAATTGAACTGATCGATTATTATTTAGTTTACAAACT  
CGAATAACGAGTGCGATATCTTTTGCTCTTTTTTTCCATTTCGACGAACAGACTTTACATTT  
TATCGCTTCGAGTGATTTTAAATTTCTCGACTCGTCGATCGATTTTAAAAAACGTTAAAAC  
GAGATATCACGTGACTCGTACGCAATACGTTAAAAAGCATTATTATAAGGTTAATGATTG  
ATCGAGGACGCTTCATATAATAAAATATCACGCGAAACAACGATATATACATAAAGTTGA

ACAATATTCGACGAATTTTTTCATCTCTGTAACGTAAAGATACGCACGTCTCGAGGGCAA  
AGGGATTGATTTGTCCTTCTACCGATTTTCGAAAACATAACATTTACAATAAATAAAACAT  
AACACACACACACACACACACATACATATATAAAACCGATATTTTCACGCGATT  
GAATCAAAATCTCCCCCTCCCCGACTCGTTGTTTCGTCCGATCGAATCGAATCGAATCGA  
ATGGAATGGAATAGAGAACGAAAAGAGGGTTGGACGCCGGTTTTTCCAGGTACACGG  
TGAACCAAAGGACGTGTTCTTCCCGGAGCCTTGGTTTCGCCAGGTATCGCGATCTGCA  
GCGAAGCGAGCTGCCCCAAAGGCACGAGAGGACCAGCGTGTACATCACGCTGCCCCGT  
CTACACTCTGCGCGAGCTGTCTCTCAGAGCCATCAAGCGACGCCTGACCCACGATCGA  
CAGGCGTTCCAGCTCGATATACCGAGGAGCCTTCAGTACGAGCTCGCTACCATGCTTCC  
ACGGAACGAGGACGAGGAGGAGCAGGAGCAGGAGGGGGAGCAGGAGGAG

>novel\_circ\_000827

ATTCACGGGAAACGCAGATGGAAATTGGAAGGGTATCGAGGTTGGCCGGCGTCGTTCT  
GGCCCTTATCTCGATCACGACCACGTGGTCCCAGCATGGTTGCTGCGTCGCGGAACTTT  
ACACCGCGTTAGCGGACATGGAGGAGCTGCTGGAGACGGAGGCGGTGCTCATCGACA  
CTCTGAACGGGTACATCAAGGCGCAGGAGGAACGTCTCGCCACTCTGAGAAA

>novel\_circ\_000828

GTGCACCCGGTGGTCCAAGAGTACAGCCTGATGAAGAAGAACGGCACGTTCCGGAAC  
CCGACCGACGAGGATCTGAGAGATTGCGGCCCTCATAGTGACCACCCTGGCAACGTCCA  
GCTGCCTCACCAGCTTGAACCTGTCGTTACCCACATAGTGATCGACGAGGCCGCCCA  
GGCGTTGGAGTGCGAGGTTCTCATACCGTTGTCCCTCGTCACCCCCCAGACCCGCCTC  
GTCCTAGCCGGCGACCAGATGCAACTTGCGCCCCGAGATATACAGCGACCTGGCCAGCG  
AGCGGGGCCTAGGCATAAGCCTGTTGGAGAGGATCTACGGGATGTACCCCCAGACCCA  
CCCGTGCAGGATCCACCTGCATCAGAATTATCGGGCCCACGAGGACATCATCAGATTCA  
CCTCGGAGATGTTCTACGAGGGGGTTCGTGAAGCCTGCCAACGACATGTTGATACAACA  
CCCGGTGTTGAAACCGTTGACGTTCTACGCCGTTCAAGGCGTGGAAGTGCAG

>novel\_circ\_000830

GTCGCACTCGCACTCGGAGAACGACAAGAGGCGGCCGGGGAGGAGTAGGGCGGCGT  
TGAAGTCGGCCAGCGAGCTTTTGTCTAACGATATGGTGTATTGCGGGTTGGCGAGGGAT  
AATCACGGGGACGAGAACGAGGAGGATGAGAGAGAGGGGGAGGAGGAAGGAGAAG  
GGGAGGAAGATCGGGAGTCGAACGAGGTGTTTCGTAGGCGTGGACGATGCCAGGTATT  
ACAATCTCTCGTCCAGTATACCGGGAACGGGTGGAAGAAGACACTCGATCAGCACTTT  
CTTGGGCAAGGAGAGAGCAAGTTCTTGTTCGAGCAAGCTCGACAACGTGTGCGACGAG  
GAAACAGCAGAACTCGGCCGTTTGGCGGAGCCTGACGCGATGGCGCCACCTGTGCC  
GACGGTCGACAGCGTGGACGGGGAGGAGCGGAGGCCGAGGTCCTGCAGCAGATCCA  
GGCGCAGGAGGCATCGAAGCGCTTCGAGCAAAG

>novel\_circ\_000831

GAAGGAAAATGTCTTATTGAAGCGCTTGATGCTATTCTTCCACCTACTAGACCTACAGA  
CAAGGCTCTCCGTCTTCTCTTCAGGACGTATATAAAATCGGTGGTATTGGAACAGTAC  
CAGTTGGTCGTGTCGAAACTGGTGTGTTGAAACCAGGTATGGTTGTACATTGCTCCT  
GCTGGTTTGACTACTGAAGTCAAATCTGTTGAAATGCATCACGAAGCTTTGCAAGAGG

>novel\_circ\_000833

GTACCACCGCGCTACACACTACTTCGGTGGAAGTTAAATCGTGATCGCTTTGGCGAGA  
GGGCGAAGGACAAAGAGGAGCATTGAGTGCTTCGCCGTAGAGCTCGTCGAAGAAGGA  
GTACAAGCAAGCACGTGACATGAGTACCGTGACCCGAGACACTTGTTGCACGACTGCT  
GTCCCTTAAAGAGTCTCGTATACACGGTGTGTTCCCTTCAGTGCGACGAGATTAGCCAAC  
GTTTCGAAATAAAACGCGAGAGAGAAAGAAGAGAAAAGGAAGAGATAGATACATGCGCGT  
GTCGTGAATTCTGTTCAATCTCGCGTTTTCTCGATACGTACTCGTGGCATGTCGGTGATA  
TATCGTTTTAATCAGCCTCGTAAGAAACCGCGTTTCGTGCTCGAGGATCATCCGTTGAC  
GAGCGAATCGCGAGTGGAATCGTGTGATGCCGTTAAGACGAATTTCTTTTGTTCCTCG  
ACTGTTGAGTGACGCGGTGTTTCGCGGCTCTGTCTAAGATCGGTGAATCGCGGTTTCG  
GAGTTTGATCGCGCGAAAGGGAGGAGGTCGATCGTAGGAGGAAGAAAGAAAGAACAT  
GAACGTGATCGTGCGCTCAGGCCGGTGACACCGGTCGAGATTGTGTGTGCGTGTGTCT  
ATCTTCGCTGATAACTCCCAGTTGGTGGACTCTCACTGAGACGACGGATATCTTTGTTT  
GGTGGATGTCGTGTCGCGGGGTTGTAGAAGGGTGGTGTATTCGGCGAAGGCAGGAAGC  
AGCGAAGAACCGGAAGGCTGGATCACCTCCGTGGAATGTCTTCGGGCGCCAAGCGGC  
TGGTGCAGTCGCTTCGGGGCCGCAGCGGTGGCGGGAGGGGCGGAGGCGGCGGCGGG  
CGGGGGGAGGGCGGGGGCGGGGAGGGAAGCGGGGGCGGCGGAGGTGGCGCGAGCA  
CAAGCGCGACCAGATTGTGCCACTACGACAGCGGTCACGAGCTCGACGAGATCTCGG  
TGGTTGGCGCCGCCATCAGGGGCGAGCGAGGGCCTTCCCACCCCCACCACACCCTGCC  
ACTGTGGCGGCCTCAAGTACGGGAGCGGGCAAACGTTGTACAGCATAGCCGGTCTGGT  
GCCCCCTGCGCCCCGCCGCGCCTGCGCACGGAGCACAAATCAG

>novel\_circ\_000834

GTTTGCATCTCGTACAAGGATGAAAGTCCGGTAGAGCGTTTAGTTCTAACAAAACCTCCA  
AGCAAATTAAGAGAGCAATGTCAACAATGATGTCACCGTTTGGATCAACCAATAGTC  
TTACCCCGGCAAGTCAACAACCTTTCACAGATGCGACTCGCTAGTTGTAACAACATTAA  
CGAGCTGGGTAAATGGTGGTTCAGGCTCGCCATCTAGAGATGATGTTCTAGTAGCACCTA  
TGTCGGTTCAACCGACACGAAAGGCCAAATGCAGTTCCCTCAGTATGGCTTCATTAAG  
AAG

>novel\_circ\_000835

GTGAGGAAGGTGTGCGGCCGCTCGGAGCTGGAGCCATCGCCGTCGAGCGAGAGGAGC  
GTCGCGGACGCAGCCGGTGGAACGGGGAAATCGTCGTCTCTCGTCCTCGTCGTCGGGC  
GGGATCGAGATGCACGCAGCTGCCGCTGCGCCGCCAGCCGGACCTTGCCGTCCCAGT  
TGCACGTGCAGCTCGGCAATTTCTTGGAAGCGTGGTCAGGTCTCGCACCTTCTACGG  
CACCCTGGCCGACACGATCTGCGAGGAGTATCCGGACAAACGGTGCTGGAACGGCGA  
ACGAGTCGGGGA

>novel\_circ\_000836

GTAACGCAGAGGACAAAACGAAACGCGACAGCAGATGCGGAACTCGTTCGAAACGC  
GCCGATTGGTGGAGAGGTGGATAAATAGACGTTGGCGACGATCACGTTTCAGGTGAGG  
AAGGTGTGCGGCCGCTCGGAGCTGGAGCCATCGCCGTCGAGCGAGAGGAGCGTCGCG  
GACGCAGCCGGTGGAACGGGGAAATCGTCGTCTCTCGTCCTCGTCGTCGGGCGGGATC

GAGATGCACGCAGCTGCCGCTGCGCCGCCAGCCGGACCTTGCCGTCCCAGTTGCAC  
GTGCAGCTCGGCAATTTCTTGGCAAGCGTGGTCAGGTCTCGCACCTTCTACGGCACCC  
TGGCCGACACGATCTGCGAGGAGTATCCGGACAAACGGTGCTGGAACGGCGAACGAG  
TCGGGGA

>novel\_circ\_000837

AAACGGTGACGATGCTCGCGAGACAGTCGGAGAACAAAACCTTTAACTGTTTCGATC  
AAGTGTATCGGACGATGGCGGTATCGAGCAGGCCCTCGATAAAAGCCCTGTACCAGGC  
GATGGTCGATTACGTGTCACCGAGCAACACGCCGGACAGTTTGCAGCAACCGTTGACG  
CGGGACATGCTTCAAGAAAGGTTTCATCGAGTTCTTCGCCAAATTGTTCCCGATCGCGTA  
TCACGGCGCCGTGAATCCCCGCCAATACGAGCAAGATTTACGGAGAAGTTCAAGACG  
TGCCTGTACGAGACGATGGAACAGATCCAACCGTTTCGGCGACATACCGGTCCAGGTTCG  
CGAAATCGGTCTCGAAAAGCCTGGAGGCGACCCGGGTCTGGTCCAGGCGTTGACAC  
TCGGCAAAACGGTGCTGGACAGGACCGACAGCGTGCTGTTCTCCGGCACAAGCCCCC  
AGCAGGAGGCCTGCTACGCCGCCCTCCTCAGGATGACCTATTGTCCAAGGTGCAAGGG  
CATCGGTCCCTCCGTCAGGCCCTGCAGTGGATTCTGCACCAATGTCATGAGAGGTTGC  
CTGACGCAGCCAGCATCCGAGCTGGACCTGGCTTGGTCCGGTTACGTGGAACAGTG  
GAGAGGCTCGTGGTGGCGGTTCGACGGTCGTAACGATCCGTTGGGCCTGAATGCCGAG  
AGGGCTGTCAGACAATTGGACACCCGCATTTTCGGACGCCATTATGCACGCAATGACGG  
ACGGACCGGCGCTCGAGGAAAAG

>novel\_circ\_000838

GTATCCTCACCTGAAATATCCTATCGAGCACGGTATCATCACCAACTGGGACGACATG  
GAGAAGATCTGGCACCACACCTTCTACAACGAGCTCCGCGTTGCCCCGAGGAGCAC  
CCCGTCCTACTCACCGAGGCCCATTTGAATCCGAAAGCTAACCGCGAAAAGATGACCC  
AGATCATGTTGAAACCTTCAACAGTCCGGCCATGTACGTGGCCATCCAGGCCGTGCT  
GTCCCTGTACGCTTCAGGTCTGTAACACCGGCATCGTCCTGGACTCCGGGGACGGCGTC  
TCCCACACCGTGCCCATCTACGAAGGTTACGCCCTTCCTCACGCCATCCTCCGTCTCGA  
CCTGGCCGGCCGCGACTTGACCGACTACCTCATGAAGATCCTCACCGAGAGAGGCTAC  
AGTTTACCACCACGGCCGAGCGAGAAATCGTGCGCGACATCAAAGAGAACTATGC  
TACGTGCCCCTGGACTTCGAGCAGGAGATGGCCACCGCGGCCGCCAGCACCTCCCTCG  
AGAAGAGCTACGAGCTGCCCCGACGGACAGGTTCATCACCATCGGTAACGAGAGGTTCC  
GCTGCCCCGAGGCTCTGTTCCAACCGTCCTTCCTGGGCATGGAGTCGTGCGGCATCCA  
CGAGACCGTGTACAACTCCATCATGAAGTGCGACGTCGACATCCGCAAGGATCTGTAC  
GCCAACAACGTGCTGTCCGGCGGCACCAACATGTATCCGGGTATAGCCGATCGTATGCA  
GAAGGAGATCACCGCCCTGGCCCCGTCCACCATCAAGATCAAGATCATCGCTCCCCCG  
GAGAGGAAGTACTCGGTGTGGATCGGTGGATCCATCCTGGCTTCCCTGTCCACGTTCC  
AACAGATGTGGATCTCGAAACAGGAGTACGATGAGTCCGGCCCAGGCATCGTTACCG  
TAAATGCTTCTAAACGTATCGGCGATACAGCAAAAACGTTCGCATAAATATCGAAGAATT  
ATCAACCGACTTGGGGGAAACCGAATATACGAGCTGGCATCGGTTTCTTTGAGAAATT  
ATCATGCTGCGATAAAGCAACTGCGTTAATGAAATATCACATTAATACAGGATCATCGT  
TAGATCTCGTCGAATATTCATCGTTGTGGTCATCCGTCGCTAGATACGACAACCCGACA  
CACTGTTGACTTCTTGATGTCATTTGGACGGAGTCGTACTTCATCTATCGCTTCATTTGG  
ACGAGGAAGCTGGCAAAGGTGTTGGTTCTCGATACAGAGCTCGCCTCGCGAGTGCC

AATCCTTGTTTCGAAACAAAATTCGTAAAACGATGGTAGAATCGGTTTCATAACCTCACTT  
ACCAAATGCATCTTTTCGACCATGAAAGGGACATTCTGGACGCGCAAAGGAAGAAAAC  
GGAATTTTCAGGAGGAATTGGACCAACTTCGTGGGAAGCTGCGCTTTTTTCCTACTGTTT  
ACGCGAGATTCTGCCTTCTAACCTCAAATATGCGTTAAATCTATTCTTAGTTCTACCT  
AATCGAATTCACCATCGATATTAATTTATTTTGTAAATATTATAAAGTATATATATTGTTATA  
TACGATATATCAAAAAGTGAAATGAAATATACATTTTCTCATACCATTAATTTATATCCTTTA  
GTTCCGACGCGTTGGTACATAACCGACGTCTTTCATTCCCTCTGTTCCACCGTTTCTTGT  
TCAAGATTATATCGTTCACGTTTCGATTCCATCTCTCTCGTTATATTCTTAAGCGTATCGGTG  
AAATATCTGTAACGTAAATCGTTGCATAAAAATATATACATACTTGGGATATTTAGAAATT  
GAACGTTGAGAAAAATCACGTATAGATTTTCGTTGTTCTTTTGCACCATGTCGAATCAAG  
TATTTTCGCGTCATCGTTATTGAATTTTACTTACACTTATAAATAAGTTTTAGAAAGATAAG  
CGATCAAGAACCGAAATATCTTTTCGAGAGCAAGAAATAACACGACTCTCGTATTCATTA  
GAATTCTATATATAATTAATTATTATCAAATATTTTATTCCCTATATATTTTACGCATACTGT  
TTACGTAAGAAAAAATATTGCTGCTTTCTTCGCGATATTCAAGACCGAATATGTTTGTGA  
GAGCGGAGAAAAGGTGGCATTCAAGTAGTTTTAAAATAACTATTATTATGATGTGGAAC  
AAACCGTGGATGACCTTGGCCTATTGTGACTAATCTACTCTTGAACAGTTCCAATATATA  
TATATATATATATTATTATATATATTTTCCAACCTTTATGGATATACTTTTTAGAAAAAATCA  
AGCTTCATTTTTTTTTTTGGGAGAGGGAAGAATTCGATCGATTTTTAATCTTAAAAATTTCG  
AATCTTGAAAATCGAGAATTTTCGCCGAAGAAGAATCTCTACATTCCCTCGAAAGCTTTT  
TCCGTCGATAAACGTATAGTTGACCGATAAAAGAGCTACAGATTTATTTTAGTCCAGATG  
CGTAATCTCAAAATATTCCTCCTACCTCTGATATCTGGGGGAAAGAAGAGAACAAGTAT  
CGCATTGATGGATTAAATGAACGTGCAAGAAAATTTTATAGCGATAGAAAAGAAAATC  
TTAGATCAAAGATTACGAGGCTTTCGAAATAAGATAATATTGATAAGTATGATAAATCTA  
CAAAAAATTGTAATTCATAGACATAAAATATAAGCAAAAAGTTTACAGAAATATAAATAA  
CGAGATAAAGCAATAATCATCGAAAAAATAACAAATCGCTTGCAAAGATAATTTTTTAA  
TTAAAGAATTCAAATTTATGGATAAAAAATAATAAATGCTTAAATGTAGAATACAAATGA  
AATTTATGATAAAATAGTTTATGTCATATCGAAAATTTTGTATACGTTCACTGTATTCTAA  
ATTGGGATCACAATTTTGCTAAAATTACTTAATGTAATTAAGAATGAATTACATCTTATTT  
TTATCCATTGAAAAGACATTTATCACGAGAACAGGGAATTTTCGAAATATTATCAGAATTT  
GAAGAATATATCCAAGCTCACTGAAAATTTACTCAGAAATCTATTTGCACAGAAGATAA  
ATCAGTACTGTCGCTTTCCATTCCCATCATTTTCCACGCAAACCTCTTACGTTATATACG  
ACACTTTGGTCTCAAACAAAACGAGAGAAAATCCACTTCCGTAACGAAACAAGATCA  
AAACTCGCTTCGCAGTATCGGTAGTTTCGAGAACTAACCTAACATATACTCTCAACTTA  
ACTATCAAACAGAATGTGTTAAAGCAAAAAGGGGCAATTAAGAGCAACACGAATTCCTC  
GATCTCGCGAATAATTCGATCTACGATCACTGATTTATCATCTCTTTCTAAATAGGAGA  
GGAGAGAACGGTGAACATAAATTTTACAGAAACGAAAACCTCGCGAAAAGGCTACCCT  
CTGGTGACGAAAGGAATAATTAAGAAAAGAAAGAAATTTAAATGACGGAAGAAGTAC  
CTACAAGAAGGAACGAAGTTATCGAAGATCTTCAGAACGGCGCATTTTCTCCTCGGTCCG  
CTTAGGGCCTGGGGCCGCCTAGTTGGGCGAGCGTCGCGACGCCACGCGAGGCAAGCC  
TTTTTCGTGCCTGTGCGGCAACCACCATCCACGAGAATGCGGGGGCGTCGTGACGAG  
AGCATATATTCGACGTGCGGACGCTCCGGAGGCACAGACGCCACTCCAACCTCTGTCCC  
GTGCACGAGCATTGAAATCGAAGAAGAAAGAAAATGTGTGACGACGAAGTAGCAGCC  
CTTGTTGTGACAAATGGATCCGGTATGTGCAAGGCCGGTTTCGCCGGAGACGACGCTC  
CCCGCGCCGTCTTCCCATCGATCGTTCGGTTCGGCCCAGACACCAGGGTGTGATGGTCGG

TATGGGTCAAAAGGACAGTTACGTCGGCGACGAGGCTCAGAGCAAGAGAGGTATCCT  
CACCTTGAAATATCCTATCGAGCACG

>novel\_circ\_000839

AAAAAAAAAAAAACACACCGTTCACTGCCGTACCGCTTCGTCTAGTTGCGTTTCCGT  
TAGTTCGATTTCTATCGGCTTTGTTCTCTACGTGGCGGTGAGATTTTTTCCGACGAACAT  
TGTCTGAATATATACGTCATCTTTTGTATATAAGTTTACATCTACGGAATAAATCAGTCTT  
ATATTCTTACAACCTTA

>novel\_circ\_000840

GCAAGATTTTGGGTACAAGTTATACAAGAATTAAGAAAAGGTGTGAAGCTAAAAAAGG  
TAGAAGCCAATTTGGGTTCAAAAAGCACAAACCCGTGGGCGTGGAAGGGGAGCAGAAT  
TTGAATTAACACCTTATGAAATTTGATGGATGATATTCGGAAGAAGATATCATCTGA  
GGAAGACTCCATCACCAACTCCGAATTTGAAGAAAGATGCTCATGCTGTTATTCTTGAA  
TTTATTCGGAGTAGACCACCTTTAAAGAAGGCATCAGAAAGACAGCTTCCACCCCTTC  
AAAAGGAATGGACTCTTCGAGAATTACTTATGGAAAGTATAAAGAAACCACCAAATTT  
AAGGTCTTCACGCAATAGATACATTCTTAAGATTGAAAGAACATCTCCTCAAAATG

>novel\_circ\_000841

TGGACTAAATTTCCAAGATTTGATGGCGAGGCAGGGTGCTATTGATTCCCCACCAAAA  
ACTCCTTTTCATTATGGGATCCGAGTGCGCAGGTGATATCGAGCAAGTCGGCGAGGGCG  
TGGAGAACTTTAAAGTGGGCGATCGAGTGGTCGCGCTTCCTGATCACAAGGCGTGGGC  
AGAGCTTGTCGCTGTACCAGCCACGTCCGTTTTTCGCGCTACCAGCCGGAATGAGCTAC  
CTCGATGCAGCGGCGATCACGATGAACTATACTGTTGCTTACATTCTGTTGTTTCAACT  
GGCTAATTTAACGCCCGGAAAGAATCTGTTACTCCACAGCGCCGGCGGGGGTGTG

>novel\_circ\_000842

GAGGGACATCGACGAGGGCATCGCCGGTGAACATCGTTGCGACGGCTACCGTGGTGA  
CGGACGAGGCGTTACTCGGCGACGACGAGGTGGACAACTGCGAGGGGGGAGAGCGAG  
GGTACGGAGAAATCGACCCAGGAGGAGGACGAGGAGGTGGACGTGGACGTGGAGGA  
GTGCAGCAGCGTGGACGAGGGGCCGATCCACGAGTCGGTTTCGGCCAGCGCTGCGGC  
GGCGGCGGCGGCGGCGGCCGCAAGTGCCAACAGGACGGCAACTCGGACGAGAGGA  
GGACGGCGCATCGGTTGAGGACCAGTTGCAACTCGGACGAGCTTCGGGACGTCGAGT  
GCCACCTCGAGACCAAGGAGCTGTGGGACAAGTTCAACGATCTCGGCACCGAGATGA  
TCATCACGAAAACCGGCAG

>novel\_circ\_000843

ATCGTTCTCAACTCGATGCACAGATATCAACCGAGGATACATTTAGTACGGTGTGAC  
AACGGACGACAACAATCTTCGCATAACCGAGCTTCAGAAGGAGGAGCACAAGACGTT  
CGTATTCCTCCGAGGCGATTTTACCGCTGTGACTGCCTACCAGAATCAATTGATAACCA  
AGTTGAAGATCGACAGTAACCCGTTTCGCCAAAGGTTTTCGAGACTCGTCCAGGCTGAC  
GGATTCGATCG

>novel\_circ\_000844



ACGTACACCGTTTCGATTCTAGTCGCTGTGAATCCATATCAAATATTGCCTATTTATACCG  
CGGAACAAATCAAATTGTACAAGGATCGTAAATCGGGGAGCTGCCTCCGCATATATTC  
GCAATTGGAGATAATAGTTATGCACATATGAATCGATACGGCCAAGATCAATGTATAGTG  
ATTAGAAATGGTTTGTCAAATCCACGAATGTTTGTGTCTTAGCGGCGAAAGCGGTGCC  
GGCAAAACGGAAAGTACGAACTAATTTTGAATATTTGGCAGCGATTAGCGGCAAGC  
ATTCTTGGATCGAGCAACAAATTTTGAAGCTAATCCCATCCTAGAAG

>novel\_circ\_000845

GACATGTCCGATGTGTGCGTGGGTACCAGCGTGGGGACCATCACCGAGCCGGAATGCT  
TGGGGCCTTGCGAGCCCGGGACCTCGGTCACTTTGGAGGGGATCGTTTGGCACGAGA  
CCGAAGGAGGTGTGCTGGTGGTGAACGTGACATGGCGCGGTAAGACATACGTGGGCA  
CGCTGCTCGACTGCACCCGCCACGATTGGGCGCCGCCGAGGTTCTGCGACTCGCCGAC  
CAGCGACCTCGACGCGCGCACGCCCAAGGGGCGGGGAAGCGCGGCAGAGCCGCCG  
CCAACGCCACCCCCGGCAACGATCTGAGCAACTTCACCGAGACGAGGAGCTCGGTGC  
ACAGCAAGCTGCGCAACGGCGGGGCCAAGGGCCGGCGGGGCGCGCAGGGCTCCCCG  
GCGGCGAGCCCGAGCCCGGCCGCGTTTCGTCCCCCGCGGCCGACCCCGCCGCCAAG  
CGCAAGTCGCGCGGCCCGAGGAGGAGGACAAGAACAAGAGGAGGGCGCCCCCGCC  
CACGCCCCCGAGCGGCTCGCCCCCGCCAGCCCGGTGCTGCTCGAGTGCCCCGAGCC  
CAACTGCAACAAAAAGTACAAACACATCAACGGGCTCAAGTATCACCGAGCCACGC  
CCACGGGTCCGCGGACGACGACGACACGAAGGAGGGGGTCACGAGCATGTCCGAGA  
ACGACGAGAGCAACATCGAGGCGCCAGCCCGGCGACGCCCGTCAAGTCGCCGGCCG  
ACAAGCCCGAGGGGACGCCGCTTCGCGCGGCGAGCCCCCTCCGACCGCCCTGCCCC  
CGGAGACCCCGCCTCCCCCGCCGCGCGTGCCTCGCCGAGCATAGCCGAGCCACCCGC  
GTCTGTGCTCGCCGCGGAGACAACGGCCACCGCCGCCAAGGGCGGCGGCGGCGGCAT  
CGTGAAACCGGGTGTGCTCAGATTCGGCCAGGAGTCCGACTTGCCCCGCCCCCATCC  
GCCGCTATGTGAGTTCCAACAACGCGAGGCAACAGTCGCAGCAACAGCAACAGCAA  
CAACAGCAGCAGCAGCAACAACAGTCGAGTCAGTCGAACTCGCCTCAAAGCCCC  
GGGCCACGAGCCAGCCAATCGCCGAGATCCTCCGTGTCCTCGCCGCATCCGGCAGCCG  
CCAACATTCCGCCTCCGTTGAATATTCTCAACCGCCTCAACCGTCCCAATTGTCGTCC  
CACCATCAGCAACAAACCTCCATCCTGCAGGCGAGCCAGCAAGCGTTGCAAGCCGGC  
CAGACCGTCGCCCCTCCGCCCCCGCCTCCACCGCAGCAGCAGTCCACCCGGCCAG  
CAAATGCAACAGCAACAACAACAAGCGTCCATCCAACAGCAGCAGCAACAACAGCA  
GCAGCAACAGTTGGCGGCCGCCACCAATTGTGAGTGCAGCACACGTTATCCGCGCAG  
ATAGGCCAGCCGTCTCAGGCCCACGTGGTGAACAAGCCGCCGGATTGCAGCAGCAA  
CAGCAACAGCAACAGCAGCAACAGCAGCAGCAGCAGGCGCAAGCGACGGGGCTGCA  
GAGCATAGCGAGCCAACACCCGGCCCTGCAGGGCCTGGCCAACCAGATATCGCAGCA  
GGCGGGCGGCCTCTCGCAGCCAGGCCACCCAGGCCAAGGCGTGCAGGCGCACTTGCA  
GCCGTATCAGAGCGTGTGCTGCACGCGAAGATGCCGCGAGTTCAAGGTTAAGCCGACC  
GCCGCCCTGATGCCCCGACCAGGACAAGAGCAAGGATCCGCGCGCCGCGTCCAAGGCG  
CAGGGGTACAAGAAGAAGTCGAGGAAGTCGCCGGGCGGCAGCCCGCACCCGTGCC  
GCTCGAGGCGCCGATCGTGGACGCGACGCGGGACGACGTGCAGAGCCCCGCCTACTC  
GGACATCTCGGACGACGCGGCGCCGGTGTCTGAGGCGGAGGCCGCGGACAAGTCGA  
AGCAGGGCCAGCAGGACAAGGACGGGAAGGTGGCCGCGAGCGCCACCTCCCCCTCC  
CACTTCAACATGTACCCGTACTACGGCCAGCCCCCTACCTGGTCCCGAGCGTGGCCG

AGAGCAAGCCGATCGACCAGAAGCCGAGCGAGCTGGTCGCGCCGAAGCAGGAGATG  
AAGCCGCTCAACATACCGCAGATGCCGACGCTGGCCAGCCTGCAGAGCGTGGTCGCC  
GAGAAGGAGAAGAAGGAGCTGAGCCAGTCGGTCCCCAGCCGCAACAGCAGCCCCA  
CTACTACGGGGGTACGGGGGTACATGCCGCCCCGGTACCCGTACCAACCGCCGCAA  
CCCGTCTCGCAACAGCAGCAGCAGCAGCAGCAGCAACAGCAACAGCAGCAGCAACA  
GCAGCAGCAGCAGCAGGAGCAGGAGATGCACGAGCAGAAGGCGAAGATAAAGCAGG  
AGCCGCAGTCGCAGCAACCGCAGCAGCAGCAACAGGCAAGCCTGAAGGAGAAGCAG  
CACGAGAATCATCAGATATTGAAGGAGAGTATAGAGATGAAGAGCCAGATGAGCCCGT  
ACCACGTGTATCACAGCGGCCAGAGTCAGAGGTCGGCGCCGCCGCCGCCCTCCTG  
GCCCCGTTGCAGGACGACCGGAGGTATTACCTGTACCCGGGTGACCAGAGGCGAAAGG  
AGGAGGTGAGCAAGCAGAGCCAACAGGGCGAAGCCGCCGCCCGCCCGAGTCCGAAGCAT  
CAACCGAAGCAGGAGAAGCTTCAAGACTTGGGAAAGAACGAGGACGCGAAGAGCAA  
GCAGGAGGGCGTGAAGCCGACGATGGAAACGCAGGGACCACCGCCGCCCGCCACCTC  
GCAGTACGCGTACATCCATCCGGGCTACATGCAGCCGCAACACTACGGCGCGTTGCCG  
TTCGATCCGGGTACCCGGTGTATCGAGGCCTCAGCCCAATGCTGGTCCCAGGCCCTTA  
TTCCGGTAACCCGTATCTACACCAATTGCCGAGGTATCACGCGCCCGAGGATCTGAGCA  
GACCGCCCGCGGGCAAAGCTCTCGACCTGCTCCAGCACCATGCCAATCAGTATTATTC  
GGCGCACAAAGATACAGAGCTTCAGGAGCGTGCCTCAAATCGCCCACCCCGAAAAC  
GTCCGCGGCCTCGGCCAGCCCATCGTCCGCTGGTCCGACACCGTCACGCCCCCGAGC  
GGACCGCCAGTTCCGTGGCCGGCCCCGGCCCCGCCCCAATCCCAGAGTCAACAATCCC  
AGGCGAAGCAGCAAGTTCAGTCGGGAGGACAGCAATCGCAACAGCAGCAACCGACG  
CCCGTCGACGCCGGCACCGGGACCTTGACCAAGGATAACAGATCACCCCGCCCCAA  
CGACACGTGCACACGCATCATCACCCACGTTGGCCTAGGTTATCCGTTATTGACCGG  
ACAATATCCCGCCCCGTACGGAG

>novel\_circ\_000846

ATCGAAATTTTGGCAAACGATGATGGAAGTACGAACACCGTTTTTAGCGGCGAGTTGGA  
AAGAGAAATCACGTTTCGAGATTCACGTTCCGTAAAAGGATCAAAGGAAGGAGAGCCT  
AATCGAGAGCGAAAACCTGTTTTTTCGAGGAAAACAACGTGGAAATATATAAGGGAAG  
AGCGATCGTTTAAACGCGAAATGCGAGATAAAGGGACGTAAGAGCGCCGGTCGACGAC  
GACGACGACAACGACGAGCAACGGACAAGAAGAGACGATACGTCGGATAAGGGCGA  
CGCAAATGCACGCTGCCGAGAACCCGTGTTGTAAAAAATAAAAAAAAAAAAAA  
AAATAAAAAAAAAATAAAAAAAAAAGAAAAAATACGGTGGAGAAGTAAAAGAAGGAAA  
AGGAAGAAGCGGAAAGGATTCGAAAGCCGAGGAAAAATTCGACTAACATCTGTCTGA  
AGAAAGAAAGAAAGAGAGAGAGAGCGAGAGAGCGAGATGTGTTTGCCGCGTTGAAA  
TGAGAAGGAGAGTAGAGAATATCGATCGAAAGCATCGAGCGCGGTAGGCTAGATAGAT  
AAGGAGAGAGCGAGCGAGAGCGAGAGCGAAAGAGCGAGAGAGCGAGAGAGAGAGC  
GCGCGCGCTAGAGCGAGAGCGAGAGAGAGAGAGAAAGCGGTGAAAGAAGAAGAAGAA  
GAAGAAGAAGAAGAAGAAGAAGAAGAAGAGGACGCGAGGAAGAAGAAGAGGAAA  
AGAAAGAGAAGGAAAGAGATCGTTTCGAGAGAGAGAGATAAAACGAGAGAGATATAT  
CGGCGAGCTTTCTTCCTCCGAGGCCGAGGTATAAGTGATGTGTTTCGACGAACGTGGCG  
CGTCTCGCGGGTGGTGGCCGGGGTACAACTGACGCGTGTGCGCGGTGGTGCGATTGCT  
GCTTGGGATCGGTGAGACCAGGAGGGCAGTTGGTGATCAGGCTGGCGGGCACCGGGG  
AAACGTTTGAAAGGGCATGGCGACCACGCCACTAGGCGGTGCGCTCCCTAACGTAAAC

CGCAAAGGGCCATCTCCGTTCCGCCGGTGGTGGGAATAGCGTGAATTACGGTAACGGTA  
ACGGCAACGCCGCTTCTGGCAATAATAATCACGCTGTCAAGAACGGCTCGTATCATCG  
AACGCCAACACACCGGCGGTAACAATAACAACCACAACCACCACAACAACAACAAC  
AACACAACGGGAATTATCTCGATCATCGTTGCCACGGCGGTGAGAAAACCGGCGACA  
ACCACGTGGAAAACACGGTGGGAAAACCGGTTGTACGATCGAGTGCGGTAACAACA  
ACAACGGGTACCGCAACGGTGGCAACGGCGTTACCAGCATCGGTGGCGGCAAACACA  
ACGGCGGACGTATCGTTGGTAGCAACGTCGGAGGAGGGGGGGGAGTCGGAGGAGGA  
GGAGGAGGAGGAGGAGGAGGAGGAGGAGGACGAGGAGGAGGACAACAACAACGTTCGT  
CGAGGAAAGAGGAACGCGGGTTAACGGGAAAGGATCAACACCGGCGTCATCGTCATC  
ATCATCATTACCATCGTTATCATCACCGTAACAATAATAGTAACAACAACAGCAGTAGTG  
ATCATCAGCAACAACAACAGAATCAGAATCAGAATCAGAATTCTCATCATCAAGGTCG  
AGAAAGATCATCGTCATCGTCGTCGTCGTCGTCGTCGTCGTCATCCTCGTCGTCGT  
CGTCGTCGTCGTCGTCGTCGTCCTCGTCGTCGTCGTCCTCGTCGTCGTCCTCGTCGTCG  
TCGTCGTCGTCATCGGGAAACCAGCGCGAGTTTAAACAAGCACGGTGGCTGCAAAC  
ACCGATGAGCTGGATCCGGCCGCAACGAACGCGACCAATAACTTCGAATACGACGACA  
ACGAATGGGACATTGGGATAGGAGATTGATAATCGACCTTGATGCGGACATCGAGAA  
GACGAGGGACGAAAAATTGAGCTCGGGGACAGGCATGGCTTCAACGCCTGCCTCGGC  
AGCGACAGCATCGAATACCACATCGAATCATCATCCGCATCATCATCATCCGCATCCTCA  
TCACCATCATCATCACCATCATCATCATCATCATCATCAACAACTGCAAAATTC  
ATCGACTACCAACGGGTAAACTCGTCCAACTTGATCGCGGTACGACAAGCCCGAAC  
GGTTGCGGTCAATCGTCGAACTCGTCGTCGTCATCGTCGTCGTCATCGTCGTCGTCGTC  
GTCGTCGTCGTCATCGTCCTCCTCGTCGTCGTCGTCGTCGTCGTCGTCGTCGTCGTC  
TTCGTCGTTATCCTCGTCATTATCGTCGTCGTCGTCGTCGTCGTCGTCGTCGTCGTC  
GTCGTCGTCGTCGTCCTCGTCGTCGTCATCGTCGTCGTCGTCGTCGTCGTCGTCATCCT  
TGTGTTTCGTCTTCGTCGATTCCGTCGTCTTGCGTGTTGAACACTTGCGGACGATCGAAC  
AGTCCC GGCAACGGGAACGGTGGAAAGCATCGTGAATAACGCGATCGTTAGTAACTGTA  
GCGGGAACGTGAACGGCGGTTCCACGGCGATCATTATTGCCGGGGCAGACCGTGGTG  
GTAAACAGAGTAACGCGTTGTAAAGTAACGTGGCGGTGCACGGGAATAACACAGGCA  
AAATGGCCGTTGAACATTCGGCAACGGTCGACAAAGGACTGAAAATGAAGATCAAGC  
GCACTAAGCCCGGGACAAAGAGCAGCGAGGCGAAACACGAGATCGTGAAATCGAAC  
GAGATCAACGGGACGTTGGCGGCCCCCAAGAGAGCGGGAACGGGGGCTGCGGGGT  
CTCGTTGTCGACGAGCGGCTCCGCAGCGATTCGGGGCGGGGCCGGTGGCGGCCCGTC  
GTCGGCCACCTCGATCGCCGCTTCCGTCGTCGTCGGTGGTCGGCCAGAACGTGCAGAGC  
TCGGATTGTGGTGGTGCGGCCGGTGGAGCCGCGGTCGTGTCCGGCGGCGGTGCGAGT  
GTGGTCGGTATCGGTGTCGGTGTGCGGTGTGCGGTATCGGTGTCGGTATCGGTGTCGGTGG  
AAGTAGCAGTGGTTGTGGTGGTGGTGGTGGTGGTGGTGGTGGTGGTGGTGGTGGTGGT  
GGTGGTGGTGGTGGTGGTGGTGGTGGTGGTGGTGGTGGTGGTGGTGGTGGTGGTGGT  
GGAGGTGGCGGGAGCGGCACCGGGGGCGGCGGTAGTGGCGGCGGATGCGGAGTCGG  
TGGAGCCGGTGGCGGCGTGGCCGGGTCCGGGTCGGCCGGCGGCGGTGGAGGAGTCG  
GTAGCGGCGCCAGTGGCGGTGGTGGTTGTGCCGGCCAATCGAACGCGTCGTCGTTGTC  
CTCGTCCTCGTCGTCGTCGTCGTCGTCATCCTCGTCGTCGTCGTCGTCCTCGTCCTCGT  
CGTCGTCGTCGTCCTCGTCGGCGTCGTCAACGTCCGTTTCGTCTCTTCGTCTCTCG  
TCTTCGTGCGCGAAATCGAAGCCGAGCCATTCCGGGAACTCGGCGGGCGGCGGTGGA  
GGCGGGAACGCGGGTTCTCCTCGAGCACCGGGTCCAAGAGAGGGTCCAGTGGCCAT

CGGCGGGACAAGGCGAGGGAGAAACACGAGAAGCCGCAGAGCAATCACGCGATCAG  
TCAGCAGAGCAAATCGGAGATGAACGGGACAGCTAGGCCGAGCGGCGGTGGAGGAG  
GAGGAGGAGGAGGAGGAGGAGGAGGGAGCAGCGGTGCGGGAGGATCCGGGACGGG  
AGGTCCGAACGGCGGTGGTGGCGGGGACAAGGTCAGACGTCGAACGGGCCGGGAC  
CGGGCGCGGGGCCGGGGCCTGGGTTAGGTGGCGGCGGTATCGGGGTCGGAGCCGGAT  
CCGGGGCTGGGGCGGTGGTGCAATCTCAGGGACCGGCAGCGGCCGCGACCGCTCCTC  
AGCAACAAAACCAAGGGCCGCCGCCGAGCTCGCGGACGGGATTCTCGGTCTCGCAGG  
GGCCCGGTCCACCGTCGTCCGGCTCCGCCGCGGTACCGTGTCCACCCCCGAGTCCGGC  
CAGCGCGACCGCCGCTGGCCCGGCTGCCAAACCCGAGCAGACCAAGCTCGCCACGGT  
ACCCGGCACTCCGATCACAACGACGCCCGACGACGCCATGGATACCGCGGCCAGTCCT  
CCACCTCCGAAGAACTCAAGACTTCCGCTTCCGAACCAAAG

>novel\_circ\_000848

GTGCGTGGAACGAGGTCTGTGAGGTGAATTTACTACGCGTCATGAGACACTCGACAAT  
ACTCGGAAAATTGGTCATCTTTCTTGGAATTGGATTACCTTCTGGAATACACCATCCTCG  
ATGAATCCACATGAACAATAACGGGAGCATCGACGGAAGGAAAAAGAATCTCGAGTCT  
GGCAAGAAAGGATGGATTTTTGAAACGATCAACACGCAAACCTATCCAGCCTTCGATA  
AAAGCGCACGATG

>novel\_circ\_000849

CGGGTTTCAACAGACAATCGTCGCGACAAACGGGTCGGCCAACCAACATAATGCCGCC  
TGGCAGCACCGTGAACGGCCACGGTGACTCTGTGGCTGGATTGACAGGTAGAAGGGA  
GGCTGAGAACGCGCCAACACCAACCACGGCCACGGCCGCTTCCTTCAACGTCACCCT  
CTCGGCCCTGGCCAAACAGAAGCAGCAGCAGCAGCAACAGCAGCAACAACAACAAC  
AGCAGCAACAGCAGCAGCAACAGCAGGCGTCACAACAGGTGGAGAACGGGAGGGGG  
AGGCGAACGAACGTGGTGAAGGAGGTGGAGAGGTTGAAGAAGAACAGGGAGGAAA  
GAAGGCAGAGGCAAGCCGAATTGAAGGAAGAGAAGGAGGCTCTGATGAATTTAGATC  
CTGGTAATCCAAATTGGGAGTTTCTCGCTATGATAAGGGAGTACCAGAACAGCATCGA  
GTTCAAGGCCGCTTCGCGAGTCGGACGTGGTCGAGGATCATCAGATAACCGTGTGCGTG  
AGAAAGCGCCCCCTGAACAAGAAGGAGATAGCGCGGAAGGAGGTGGACGTGATCAG  
CGTGCCAGCAAAGACCAGATGGTGGTGCACGAGCCGAAGGCCAAGGTGGATCTCAC  
CAAATATTTGGAGAATCAAATTTCCGTTTCGACTACGCGTTCGACGAGACTTGCAACA  
ACGAGATCGTGTACAAGTACACGGCGAAACCGCTGGTCCAGACCATCTTCGAGGGCG  
GGATGGCCACCTGTTTCGCTTACGGTCAGACGGGAAGCGGGAAAACCCACACGATGG  
GCGGCGATTTTAACGGGAAAACCTCAGGATTGCAAGAAAGGTATATACGCGATGGTCGC  
CAACGACGTGTTCAAATGCCTCAAATTGTCCAAATATCGCTCCCTCAATCTCATCTTC  
CGCGAGTTTCTTCGAAATTTATTCGGGAAAGTGTTTCGATTTATTGGCGGACAAGGAAA  
AACTACGCGTCCTCGAGGATGGGAAACAACAGGTGCAGATCGTCGGATTGACGGAGA  
AGGTGGTGGAGTCGTGCGACGAGGTATTGAAATTGATACAGCACGGGAACAGCGCGA  
GGACCAGCGGCCAGACGAGCGCCAATTCCAACCTCGTCTCGATCGCACGCCGTGTTTCA  
AATCATAGCCCGTACACCGGCCACCCACAAAGTTTCATGGAAAATTCTCGTTGATCGATC  
TCGCGGGGAACGAGAGAGGAGCAGACACGTCTTCCGCCAACAGACAAACTCGTATGG  
AAGGTGCGGAGATCAACAAGTCACTGTTGGCCTTGAAAGAATGCATTCGAGCGTTGG  
GACGCAAAGGAACGCATTTACCGTTTCAGGGCTAGCAAGTTGACGCAGGTGTTGAGGG

ACAGCTTCATCGGTGAAAAATCGAAGACATGCATGATCGCCATGATCAGTCCGGGAAT  
GAGCTCCTGCGAACATTCGTTGAACACTTTGAGATACGCGGATCGAGTGAAGGAATTG  
GCGGCCACCGATCCAACCGAAGTGAAGATTTCTCGACGGACGACGAACGGGAATTA  
AAGATCGAGGCACAGTCGAACAACGTGCTGTCTGACAGCGACTTGCGCAATTACGAT  
CCCTGAACGAGAGCGAAATATCCCAAGATCTTTACACGTTTCACGAGGCGGTATCAGC  
GTTGCAAATGCTTGAGGAGGAAGTCTTGGACACGCACAAAATGGTTATGGATCAAACG  
ACCAGATTTCTCAATGATGCACACAGTGTGTTTCAAGTGTGACTCACGAAGTAGACTATG  
ACCAAGAAG

>novel\_circ\_000850

CAAGAGAACGTTTTCTTCGTCGAGCAGTACTGATGATGATCAAAGCGGTTCTGATAC  
GGAACATGACTCGAACGCATTGCGCTCTAAGGTCCACTCTGGAATAGTTCATCATTCCG  
GTAATCATTTCGGTGCAGAAAGCGTCGGGGAAATTTACCAAAGCATTTCGGTGAAGATTCT  
AAAACGATGGCTTTACGAGCACAGATACAACGCGTATCCAAGCGACAGCGAGAAGCTT  
ACATTGAGTCAAGAAGCAAATTTGACTGTACTCCAGGTTTGCAATTGGTTCATAAATGC  
CAGACGACGAATTTTACCAGAAATGATTCTGAAGAGAAGGTCATGATCCTTTGCAGTATA  
CAATATCTCGTCGTGGTAAAAAGATGCCTGCAGGAAATCATCAACAATCATCCAGTCTT  
AATTCAAGATCTAATCAAAATTGGGATTCGTTAGCTGGCATGAGCGCTCCAAAACGTAG  
CAGAGATCATGATTATGAAGATCATGCTGGATTAATGTATAG

>novel\_circ\_000851

GAGGAATATAGTCAACGTAGACGTCTATCTACTCCAAGCGACAGTTCTAGTCCTCCTAG  
AACAATGAGACTTTTTAAATCTACAGGTACATTGACTAGAGAAGAGGAATCCTTTTGCG  
AATCAAATAACACTCTCACTAAAAAAATCAAGGACAGGAAGTTGAGAGAAAGGGTT  
GGTTTAAATCTCTATCTAGGAAGAATAAATCGAATATCAAATAATGGATAAGAAACCTA  
GAATACCAGGAAGTGAAATTTTAACTACTGGAAGTGAAGAAAGCTTCGTCCGTACC  
TGAACGAGTTTTTTGTACAAAAGAATTTACGTTTTTTTGGGGACACCGATCAGGAATCA  
GTTTCATCTAATAGAGATCGCAGAAATAAACGAGATGATCATACCTGTTTCAGGACATGA  
TGTTATGAATTCCAGCCGTTACAATTTGGGTATTCTATCAACATCTCGGAAACCATCGAG  
ACTTACTGAAAGTGCATTGTCTTCCGGTGAAAGTACAACAGGAGATAGCAGTCAACAA  
AGTCAGAATTCTCAGAGATCACAGAGATCTGTTGTATATCTTCATGCTGCTACGG

>novel\_circ\_000852

GACGTGAAGCATCCCGCGTGACCGCGGCTCTGATAGGAGATGGCGAAGGCAGGTTGAT  
TGCCACTCCGATCCATAAGGAGAGCATAGCTTTGAAGAGCAAAGAGGATCTAGCTCAG  
GAGGCGGCGCTAGTACTTCAACAAGCGGGCAGCCTTCATTGCGTTGCTCATGACAACA  
GACGATTGCCAGGTCGTTTCAGCACTTTGCCAGTGCGTCGTAACAAAAAAGGCCAG  
AACTACCGCTTGATGTAAGACGAAAAAGTGAAGAAATAGTCACGAACAACACAGATC  
TTATCGACACACCGAAAAATAAAGAAAAAAGCATTAGAAAGAAGTATCAGCGATGCAAA  
CATAAAAAAGTTAAAAAGTCCATTGGCCAAATTCTTTTCTCCAAAGTTAGAAAGGAAG  
CATAAGCTGGTTAGTCGTAGCATCAGTGACGCGGCTAATTTGTTACGGTCCCATCGCAA  
AAGGAGCGGTAGCGAAAGTGAAGGATCGCATTTGGAGAGTAATCGAGTGAAGAAGCA  
ATTATCCCCTATTATCGAAGCGTCGCCTCACATTGATCAACAACCTTTTCATTTCCGTTT  
GAAGATCGAAAACGGTGAAAATAGGCCGGAACCAAAGAAGTGGAaaaaaAGAGGAAA

TCATCGATGGCGAAAAGGTGACGGAACATACAGAAACGGTGAAAGAAAAGAAAGAA  
AAGATCGAAGAGAAGGACGTGAACATCGGAAAACCACTAATATCGTCGAGAAGAGAA  
AACAAGGGAATCGTAAAACATATACCTATTCAACTGGAGGTAGACGATAAGAAAAATA  
AAGAGGAGAAGAGAGAACAGAAGAAAGAAGAAAAGACAACAGGCTCGATTCTTTA  
CCAATCATAAAAAATACTGGATTTCGACGAAGTAGATAAAATCGATACGAATAGCATGCT  
GCACACTAGCCGATACGATCTCCAACAACGATCTATTGAAGAATCAACGATACATAAGA  
TGATTCATCAATTATCCAGCGATCAGTCACCACCACCGCAATTGACCAAAAACAATGGTC  
TCATCTGGTCCAGGATTTCAGTCATAACAACAATCGACCATTCTCTTACACTAGACCGAA  
TGAATGTTGTGGTATGCCATCCCCGCAAACCTGTGATTTACGCTCAAGTGCAGACCGAG  
AAGAAAAAAGCGCAAAGAAGTCATTTCGGATAGCGACGAGGGGCTTGGCCTTGAAAGA  
AAAGATTTCGTCGCGAGAAAATAGTCCAGCGGAGAAAGGAATATCATAGAATGGATTCT  
CTTATAACAATGAATTACGACACAATAATGAAATCAATATGTTCAAATCTAGATTCTGAAG  
AGGATAGAAAGAACGATGATATCCATTTACCAATCGTTATGTTGAAACAGAAGATTAC  
GCGAGTAGAGACGTAGATACGAAACGACATCATAAATTAAACGATATTGACAGACGTCT  
ATATGATAAACCTGAAAAGTATACATCCACAGTATTCGTAGATACTTTTCGATCGTGGTAG  
AGCCGATGGTACAGATGCTAGACAACGAGATAATAACGAATTTTCAAATTCTAGACAAA  
TTCCAAGCGGAATATCGAATAAGACATCCGAATTAAGCGCGAGACGTGATCTTCTTGAA  
TCTAGAATCAAGTCGAGGCTGCTCGCAGATGAAATTTTCGCCGCGAAGAACAGTATGA  
ATACACCGAAGAAATCTGAGCACGAGATTATCGACAAACCAATCGTTCCATCTCCAATT  
ATTCCTAATCGCGTTGCCTCGCCTAAACGTTACATGGATACATACATCACGGAAACACG  
CACCAACAGCAATGGAGAGAAGTATATTTTTGAAAAGGAGATCCACGAAGACAATGGT  
AAAGTGACGGATATGAAAAAAGATTACTAATAAAATTCCATCGGATGGATACATCGA  
TACCAAACCGCGAGATGGATATACAATCGAAACGAGAACGGACAAATATGGAGACAGA  
TATATTGTTGAGACGCGAATGCACGAAGGTTATGCGGACGATTTCAAACCATTTCTTAG  
TGACAGGAATAGAATCAGTCCAGAAGATCGGTATCAATCACCTAGAACTTAATTAGTT  
CTTATAAGTCATCTGATTTGCGACCCGAAGAAAACACCGTTACTCATCACTTTTGAAC  
GAATCCAAGGAAAACAATTTTCTTTCTTCACCTATAATCGCAAAGAAATTCACCATGAC  
GGAAAGAAAATTCTCCAAAAGTGATGATTTTTTGGATAGAGATATTTCGACCGAGAGAC  
GAATACTTCCCTAAGAAGAAGAATTTTGAATCAATCCGTGGTATGAGCAAATCCACGCA  
ACGTTTGGATGAAGTAGGTGAAAATTCGCGAATCAAAGCTCTAAAAAGTGAATATACG  
ACTAGGTGCGACGAGAACTTAAGCAGCCACGCAGATTACATAAACACTAGAGATGTGC  
GTCGACCTCTTTTAGATAGTCCCATTATAAACGGGCGGAGGGAACAGTCACCGTTTACG  
AAAAGACATTTGGATAGCTTACGCGAGGGGGCCGAACGACGATTACGATACTGATATATC  
TCAGATGACAAGTAGCCAACCTAGAATCAAATACTACAAAGAAACGCGCACCCTCAA  
CGATATATGAACAGTAAGCACCCGATTCATGATGATTACGATAGTTCTCCATCGAGGATA  
CGAACCGATCGTGGAGGTTACAATTCAAGCAGATACGATTCTGATACTACAGCCAGAG  
ATTCGATTCATTGTGAAACTCGATACGACGAAACCTCACGAACATTGAGAAAAGAACA  
TCGAAAATTTAATGAAGATTCAAAAAAGCAGAGATCCCGCAATCAATTAGATTATTTG  
ATGATTCGGACGCCAGAGAAAATCTACGCGTGAGTATTGGACGATTAGAACCATTTCGAT  
GAAAGTCCAACACGATCTCCGAGAACTTATCACGACAATGGCAAGTCGAAACACATCA  
AGCAAGATATCAGAACGCATACTGAACGCAGACATCGCGAGACTCGGCTCAATGACTC  
TGATCGGAAGGATCGTTTGGCCGATTCCGGAATCGAAAATGATTACAGGCGTGACTCG  
CAAGAAGTTGATCGAAGGGAACAAATTGAATCGGAAGACGAAGATTTTGTTACGAGG  
CAATTTATCAAACATGAGAAACGGCATACTGATCGTAACATAAATTTAACACCCTCCGA

GCAGCGAAAATACGATAAATATTCGAACGATATGTTAAAATCATCGCCGACCACCACAA  
AACCACCGTCAGGTACAGATAAGAAATACGAGAAAAAGGCAAAGAAGAGCGGTACGA  
TGAGCAAAGTAAAGCAATTGTTTAGTAAAAAGGAAAAAAAAACAAAGGAAGAGAAA  
AACAAGAAAAATGCAAAAAGCAGCAGCAGTGGAGCTCTTACAGACGACGAAGTGATG  
ATCAGATATAAAGAATATCGAGGTGGTCAATTGAGAAGCGCGAAAAGTACGCGAGACT  
TGGGCAGTGACATCAATCAG

>novel\_circ\_000853

GTCGGTGATCGGGTCTAAGAGGGAAGGAGAGGGGAGATAGAGAGTATAGAAAGAAAG  
GAAGGGTGACATCATTTAGAGGCCAGGGTATTAAAGCATATATGTGTGCAGGGGTTTCG  
AAGTAAGAAAGAAAGAAAGAAAAAATACGACGAAAAAGAGAGAAAGAGAAAGAAA  
AAAGAAAAACTGGTGTCCGACTCTATATGTTATGATTGGGAGTGAAAAGACGGGAAGA  
TGCTCGAGGTTTCAGCAAACGGAGTTTTTAAGAGAAGGAGAAGCCTGCAACCCTTCTAT  
CGACATACTACATCCTGATTTGACCGAAACTTCCGTTTCCGAACGGAAGTCCGCTGAA  
AGAAGCGTCTCCTTCAATCGAGACGTCCACGTCAAGAGGATCGGACGTGAAGCATCCC  
GCGTGACCGCGGCTCTGATAGGAGATGGCGAAGGCAGGTTGATTGCCACTCCGATCCA  
TAAGGAGAGCATAGCTTTGAAGAGCAAAGAGGATCTAGCTCAGGAGGCGGCGCTAGT  
ACTTCAACAAGCGGGCAGCCTTCATTGCGTTGCTCATGACAACAGACGATTGCCAGGT  
CGTTTCAGCACTTTGCCAGTGCGTCGTAACAAAAAAGGCCAGAACTACCGCTTGATG  
TAAGACGAAAAAGTGAAGAAATAGTCACGAACAACACAGATCTTATCGACACACCGA  
AAATAAAGAAAAAAGCATTAGAAAGAAGTATCAGCGATGCAAACATAAAAAAGTTAA  
AAAGTCCATTGGCCAAATTCTTTCTCAAAGTTAGAAAGGAAGCATAAGCTGGTTAG  
TCGTAGCATCAGTGACGCGGCTAATTTGTTACGGTCCCATCGCAAAGGAGCGGTAGC  
GAAAGTGAAGGATCGCATTTGGAGAGTAATCGAGTGAAGAAGCAATTATCCCCTATTAT  
CGAAGCGTCGCCTCACATTGATCAACAACCTTTTCATTTCCGTTTGAAGATCGAAAAC  
GGTGAATAAGGCCGGAACCAAGAAGTGGAAGAAAAAGAGGAAATCATCGATGGCGA  
AAAGGTGACGGAACATACAGAAACGGTGAAAGAAAAGAAAAGAAAGATCGAAGAGA  
AGGACGTGAACATCGGAAAACCACTAATATCGTCGAGAAGAGAAAAACAAGGGAATCG  
TAAAACATATACCTATTCAACTGGAGGTAGACGATAAGAAAAATAAAGAGGAGAAGAG  
AGAACAGAAGAAAGAAGAAAAGACAACAGGCTCGATTCCCTTACCAATCATAAAAAA  
TACTGGATTTCGACGAAGTAGATAAAATCGATACGAATAGCATGCTGCACACTAGCCGAT  
ACGATCTCCAACAACGATCTATTGAAGAATCAACGATACATAAGATGATTCATCAATTAT  
CCAGCGATCAGTCACCACCACCGCAATTGACCAAAACAATGGTCTCATCTGGTCCAGG  
ATTCAGTCATAACAACAATCGACCATTTCTTTACACTAGACCGAATGAATGTTGTGGTAT  
GCCATCCCCGCAAACCTGTGATTTACGCTCAAGTGCAGACCGAGAAGAAAAAAGCGCA  
AAGAAGTCATTCGGATAGCGACGAGGGGCTTGGCCTTGAAAGAAAAGATTTCGTCGCG  
AGAAAATAGTCCAGCGGAGAAGGAATATCATAGAATGGATTTCTCTTATAACAATGAAT  
TACGACACAATAATGAAATCAATATGTTCAAATCTAGATTTCGAAGAGGATAGAAAGAAC  
GATGATATCCATTTACCAATCGTTATGTTGAAACAGAAGATTACGCGAGTAGAGACGT  
AGATACGAAACGACATCATAAATTAAACGATATTGACAGACGTCTATATGATAAACCTG  
AAAAGTATACATCCACAGTATTCGTAGATACTTTTCGATCGTGGTAGAGCCGATGGTACA  
GATGCTAGACAACGAGATAATAACGAATTTTCAAATTCTAGACAAATTCCAAGCGGAAT  
ATCGAATAAGACATCCGAATTAAGCGCGAGACGTGATCTTCTTGAATCTAGAATCAAGT  
CGAGGCTGCTCGCAGATGAAATTTTCGCCGCGAAGAACAGTATGAATACACCGAAGAA

ATCTGAGCACGAGATTATCGACAAACCAATCGTTCCATCTCCAATTATTCCTAATCGCGT  
TGCCTCGCCTAAACGTTACATGGATACATACATCACGGAAACACGCACCAACAGCAAT  
GGAGAGAAGTATATTTTTGAAAAGGAGATCCACGAAGACAATGGTAAAGTGACGGAT  
ATGAAAAAAGATTACTAATAAAATTCATCGGATGGATACATCGATACCAAACCGCGA  
GATGGATATACAATCGAAACGAGAACGGACAAATATGGAGACAGATATATTGTTGAGAC  
GCGAATGCACGAAGGTTATGCGGACGATTTCAAACCATTCTTAGTGACAGGAATAGA  
ATCAGTCCAGAAGATCGGTATCAATCACCTAGAACTTAATTAGTTCTTATAAGTCATCT  
GATTTGCGACCCGAAGAAAACACCGTTACTCATCACTTTCGAACTGAATCCAAGGAAA  
ACAATTTTCTTTCTTCACCTATAATCGCAAAGAAATTCACCATGACGGAAAGAAAATTC  
TCCAAAAGTGATGATTTTTTTGGATAGAGATATTTCGACCGAGAGACGAATACTTCCCTAA  
GAAGAAGAATTTTGAATCAATCCGTGGTATGAGCAAATCCACGCAACGTTTGGATGAA  
GTAGGTGAAAATTCGCGAATCAAAGCTCTAAAAAGTGAATATACGACTAGGTTCGCACG  
AGAACTTAAGCAGCCACGCAGATTACATAAACACTAGAGATGTGCGTCGACCTCTTTTA  
GATAGTCCATTATAAACGGGCGGAGGGAACAGTCACCGTTTACGAAAAGACATTGG  
ATAGCTTACGCGAGGGGCCGAACGACGATTACGATACTGATATATCTCAGATGACAAGT  
AGCCAACTAGAATCAAAATACTACAAAGAAACGCGCACCCTCAACGATATATGAACA  
GTAAGCACCCGATTCATGATGATTACGATAGTTCTCCATCGAGGATACGAACCGATCGT  
GGAGGTTACAATTCAAGCAGATACGATTCTGATACTACAGCCAGAGATTTCGATTCATTG  
TGAAACTCGATACGACGAAACCTCACGAACATTGAGAAAAGAACATCGAAAATTTAAT  
GAAGATTCAAAAAAGCAGAGATCCCGCAATCAATTAGATTATTTTCGATGATTCGGACGC  
CAGAGAAAATCTACGCGTGAGTATTGGACGATTAGAACCATTTCGATGAAAGTCCAACA  
CGATCTCCGAGAACTTATCACGACAATGGCAAGTCGAAACACATCAAGCAAGATATCA  
GAACGCATACTGAACGCAGACATCGCGAGACTCGGCTCAATGACTCTGATCGGAAGGA  
TCGTTTGGCCGATTCCGGAATCGAAAATGATTACAGGCGTGACTCGCAAGAAGTTGAT  
CGAAGGGAACAAATTGAATCGGAAGACGAAGATTTTGTTACGAGGCAATTTATCAAAC  
ATGAGAAACGGCATACTGATCGTAACATAAATTTAACACCCTCCGAGCAGCGAAAATAC  
GATAAATATTCGAACGATATGTTAAAATCATCGCCGACCACCACAAAACCACCGTCAGG  
TACAGATAAGAAATACGAGAAAAAGGCAAAGAAGAGCGGTACGATGAGCAAAGTAAA  
GCAATTGTTTAGTAAAAAGGAAAAAAAAACAAAGGAAGAGAAAAACAAGAAAAATG  
CAAAAAGCAGCAGCAGTGGAGCTCTTACAGACGACGAAGTGATGATCAGATATAAG  
AATATCGAGGTGGTCAATTGAGAAGCGCGAAAAGTACGCGAGACTTGGGCAGTGACA  
TCAATCAG

>novel\_circ\_000854

AGGGACGACACGAGTTTACTCGCGCAATTTTTCTACGCCGACGAATCCTTGAACGCCG  
TTGCCTGCGAGTTGGAATCGTTTCGACGGCCCGCAGGAGCCGGAGAGATGCACCACGC  
TGGTCAATCAACTGCGCCATTGCCAGGACAAGGTGTTGACGATATGCAGCCAGATAAT  
GGACGAGCTGATACCGGAGAGCAGGGCGAACCGGGACTTTAGGGTGAAATTCCCCGA  
TGACGTGATGCAGGAGAATCTTGCGGGCCAGCTGTGGTTCGGGGCGGAATGCTTGGCG  
GCCGGCTCCTCGATCATGAACAGGGAGGCTGAAAGTTCGGCCATGAGGCCGTTGGCG  
AGGGCTTTGACGAAGTCTTTGGACATAGTCAGGAATTTGCTCAGAGAGCACGCGCTGA  
AAGGTCACATGAACCTGAAGTATCTTTCTCAAACGCAAAATCCATTGGACCCGTCCCT  
GGAGAAGCTGATCGAGTCGTTGAAAATCTTCGATCGGTTGTTTCGCCGATTTTCGAGCTG  
TGTTACGTAGGCGTGATGGTGCCGGTGAAATCGACGAAGGAGTACGAGCAGCAGGAG



CTCGTGTGCGTTTTATTTTCGGAGACGCTGCAAAGAGCTCTCGAACGTGGATTGCTCA  
GCCAAGCCGACGTGGATAATTACGAGCCAGCTCTGATGTTTACTATTCCACGTTTGGCG  
ATTGTTTCTGGCCTCTTGGCTCCGCCTGGAGGCCCTTTGTGCCTCAATTCCCCTGACAA  
CATCAGCGAAGTGTTTAGACCTTTCAGG

>novel\_circ\_000855

GCAAGAACTGAAGTGCCCGGACTGCGAGAAGCTGTACGGCTACGAGACAAACCTGC  
GCGCCACATACGGCAACGCCACCAAGGTATCAGGGTACCGTGCCCGTTCTGCCAACG  
GACGTTACGCGCAACAACACCGTGAGACGGCACATAGCGCGCGAGCACAAGGCCGA  
GCTGAACCTGAAAGCGTTCCAACAGTCGAACCACTCGATGTCGGACACGGTGCCGCA  
GTAACGGCGTCCTCGCCACCGCTGTCGTTTTAGCCGCCGTTCACCACCGTTCCGGC  
CGTCGCCATCGTGTGCGGGCCGTCGCGACGCCACGGGAGACGGCCAGAGCGCGCCCA  
GCAAAGAACCGCGAGGCGCTGGAACGAGGAAGGCCGCGCAAAGCAAGCTCGCGCCC  
GCCTTCTTGAATCCCGGTCAACGCCATCCCCGTCTCATGATGAAACATCCGAGCGGCC  
CTCCGTGAACTGCGATTGACAGCGACGTAATACATATATACAGAGCCCACACAGCCTTT  
GAAAGGAAAACGACAAAGGAAACGATCCAATGCGACCCGCTGTGCCTCGTCTCGGTG  
TGATCTTGATAGTAGTTGTCAATTACACACTGCGACCCCGTCTGCAAATCATCGTGTTCC  
TTTCGTGTTAATTTACGGGGATGCGGATTCGGGATGAGGATACTGAAATTAGAGGGAG  
GGGGGATGTAGGAAAAATTTGCACGCGATGATCCGAGCCGCTCGGAGATTCTTTTTTTT  
CGTTCTCTTGAATTAGATTTAAGGTGTTGCTCGATCGAGAGTCGCGTGTGCTTCTTTTCG  
GGGGAAAATTTGAAAAGTCTTCGCGGAGGATTCGGATGCGGCAACGACAGAGGACGG  
TTGACCGCGAAATTTAGAAGAATTTAGTCCCGGTGATCGGATCACGAGCGAGGAAGGA  
GATTAAACGAGAAGTGAAATGATGGAGGAGGGAATGGAGGAAGGGAAAGGGGTTTG  
GAAAAATGTCGACGTCCGATTACTAAGCGTATGGAAGATTGCATTAACAAGAGAGAAA  
TGTCGTTTGGGATCAGGAGGATGTGAAACTCGTCGCCTCGGACATGCTACGCTACTACT  
ACTACTACGAATAACCATACAAAACCTAGTCAATGAAAGTGCAACGTCGAGTAAGAGTT  
ATTATTACACTGTAAAAAAGGTTAGAGACGAAGAAGAAGATCGAAAGATATTCACGACGCCTC  
AGAAGAGGGAATATAATAAGCGAGTTTACAAAAAAGACGCATATCTCAG

>novel\_circ\_000856

GCAAGAACTGAAGTGCCCGGACTGCGAGAAGCTGTACGGCTACGAGACAAACCTGC  
GCGCCACATACGGCAACGCCACCAAGGTATCAGGGTACCGTGCCCGTTCTGCCAACG  
GACGTTACGCGCAACAACACCGTGAGACGGCACATAGCGCGCGAGCACAAGGCCGA  
GCTGAACCTGAAAGCGTTCCAACAGTCGAACCACTCGATGTCGGACACGGTGCCGCA  
GTAACGGCGTCCTCGCCACCGCTGTCGTTTTAGCCGCCGTTCACCACCGTTCCGGC  
CGTCGCCATCGTGTGCGGGCCGTCGCGACGCCACGGGAGACGGCCAGAGCGCGCCCA  
GCAAAGAACCGCGAGGCGCTGGAACGAGGAAGGCCGCGCAAAGCAAGCTCGCGCCC  
GCCTTCTTGAATCCCGGTCAACGCCATCCCCGTCTCATGATGAAACATCCGAGCGGCC  
CTCCGTGAACTGCGATTGACAGCGACGTAATACATATATACAGAGCCCACACAGCCTTT  
GAAAGGAAAACGACAAAGGAAACGATCCAATGCGACCCGCTGTGCCTCGTCTCGGTG  
TGATCTTGATAGTAGTTGTCAATTACACACTGCGACCCCGTCTGCAAATCATCGTGTTCC  
TTTCGTGTTAATTTACGGGGATGCGGATTCGGGATGAGGATACTGAAATTAGAGGGAG  
GGGGGATGTAGGAAAAATTTGCACGCGATGATCCGAGCCGCTCGGAGATTCTTTTTTTT

CGTTCTCTTGTAATTAGATTTAAGGTGTTGCTCGATCGAGAGTCGCGTGTGCTTCTTTTCG  
GGGGAAAATTTGAAAAGTCTTCGCGGAGGATTCGGATGCGGCAACGACAGAGGACGG  
TTGACCGCGAAATTTAGAAGAATTTAGTCCCGGTGATCGGATCACGAGCGAGGAAGGA  
GATTAAACGAGAAGTGAAATGATGGAGGAGGGAATGGAGGAAGGGAAAGGGGTTTG  
GAAAAATGTCGACGTCCGATTACTAAGCGTATGGAAGATTGCATTAACAAGAGAGAAA  
TGTCGTTTGGGATCAGGAGGATGTGAAACTCGTCGCCTCGGACATGCTACGCTACTACT  
ACTACTACGAATAACCATACAAAAGTAGTCAATGAAAGTGCAACGTCGA

>novel\_circ\_000857

GAGTAACGTTCAAGGCGCACAGGTTAATTCTCGCAGCATGCAGCAAACACTTTCAAGA  
GCTGTTTGAAGGAATGCCTCCTTCTCCCGCGGGACTGATCGTTATTCTCGACGGAACG  
AGTGCCCAACAATATGGCGTCCCTTCTCGAATTCATGTACCGTGGAGAGGTACACGTGTC  
CCAGGAATCCCTCAGCTCTTTCCTCAAAGCAGCCGAATGCCTTCAAGTAAAGGGTCTG  
TCCATCGAGCACGAAAAGCTGGCAGTAGCGCAGAGGCACGCCGCTGAGAACAATAAC  
TCGTCCACGGACACCGGGGATGGTGGTGGCGGAAGCGGTGGTGGAGCAGCGGCAGC  
GGTGACAACGGAAGCGGGAACGTGAGCGGAAACGTCAGTGGTACCGTGAGCGGTAG  
CGTGGGTGGCGGAGTTGTTCGATGACGTTGGCGGAGGAGTCGGCGAGGTGAGCGACAT  
GGGTGAAGCGGGTGAAGCGACCATGGTGAGAAACACCATAAAGAGGGCCCGTACGCC  
AGCGCCGTCTCCTGCCCCCGCTTACCCCGTGCCCAACCTCTACTCAGCTACCTCTCACT  
ATTACGAAACCTTGCCGAAAAGGCTGATGAGATCGCCCAGCGACGTGGATACCTTGGG  
AAGGGCGAGTGTGTTGCGCGACGGCACTGCCTTCCGGCCCGCATCAGCGCCGCATCCG  
CTTCTTCTGGAGAACCACTTTTACCAGCCGTTTCATCCACCCTACAGAAACACCCGCGCA  
TCCCCACACCGCGCCACACACACCCACGGAATTGGAACAGGAATTGGAACGAGCGAG  
GTCCGAGGAACGCAGCAATTGCGATCTCAAGGAAAGCGTAGCCGAAGATCTACGAATA  
AAGCAAGAACCAGTGGCAATGACCGACCGGGAAAGGGCGGAAAAACTGGCAGAAAG  
ATTGTCAGGCGAAGTATATACCGGGGGAAGGGGGTTCGATAGTGGGCATTACGGTTTCG  
AATTCGGATCACATGCAGCCCGGAGGACAAATTGGACCCCCCATGGTGCGTTTGGCCG  
TTGCTCATCCACCGACTCCTGATCTCAGCCCTGCACCCACTAATCCCGCTATGTGGAAT  
ACGAAAATGAAGAAGGCTGGCACTGTCTCCACACCCACG

>novel\_circ\_000860

TTTGCATTGGAACCAATGGCCGCCTCTCTGTTCCGTCCAACAAACAACACCACTACCG  
GAATCTTCGAGACCGGTACACCAACTGTACTTACGTTGACGGCAATCTGGAGATCACAT  
GGCTCCAGAACGAGACATTCGACCTCAGTTTCTCCAGTATATACGGGAGGTACAGG  
TTACGTGCTCATCAGCCACGTGGACGTCAAGAAGATCGTTTTGCCGCGATTGCAGATCA  
TACGAGGAAGAACACTGTTCAAGCTCACCATTTCATGACATCGAGTTCGCCCTATTCGTC  
ACGATGTGTCAGATGCAGAACTTGGAGATGCCAGCCCTCAGAGATATCCTCAACGGCA  
GCGTGGGCATGTACAACAACCTGTGCCACATCCGCACGATCAACTGGGAGGA  
AATAATCACAGGGCCGAGTGCAATGTACTCCTACGTGTACAATTTTACGTCTCCGGAAC  
GCGCCTGTACACCCTGCGATAAGAGCTGCGAGCAAGGCTGCTGGGGAGAGGGGCCTG  
AGAAGTGTGAGAAGTATTCGAAGACAAACTGTTTCGCCTCAGTGCTGGCAGGGCAGGT  
GCTTCGGGCCCCAATCCGCGGGAGTGTTGCCATCTTTTTTTCGCGCCGGTGGCTGCACAGG  
CCCGAAACAGAGCGACTGCATCGCCTGCAAGAACTTCTTCGATGACGGTGTGTGCACG  
CAGGAATGCCCCGCCCATGCAAAAATACAATCCTACGACGTATTTCGTGGGAGCCTAATCC

TGACGGCAAGTACGCGTATGGCGCAACCTGCGTGAGAAGATGTCCGGAACACCTTCTG  
AAAGACAACGGGGCTTGCGTAAGATCTTGCCCGCCCAAAAAGAAGGCGTTGAACGGT  
GAATGCGTGCCCTGCGACGGACCCTGCCGAAAACCTGCAAAGGTGTGAGAAAGTG  
CATTCCGGGAATATCGACAGCTTCAAGGATTGCACCATCATCGAGGGATCCATCACGAT  
TCTAGACCAAAGTTTCCAAGGATTCCAACACGTGTACAGGAATTTAGTTTCGGCAAA  
CGTTACGAGAAAAATGCATCCGGACAAGTTGGAGGTGTTTCAGCACCTTGAAAGAGATCA  
CAGGGTTTTTTAAATATTCAAGGTGATCACAAGGATTTCAAGAATTTATCGTATTTTCGGA  
ATTTGGAGGTGATAGGCGGGGAGAACTTTGACCGAGTACTTTGCATCGTTGTACGTCGTG  
AAAACGTCGTTGGTCTCGTTTCGGGCTTAGCTCGCTCAAGAAAATTTATTCGGCTCGAT  
AGCCATTCTGGAGAACAAGAATCTATGCTACGCGCAAAGTATCAATTGGACCAGGATC  
AAGAAATCGTCGGAACACGAGAGTTTGTGTCCAATAATCGGAACGAGAGCGAATGCA  
TAAAAGATGGACTAGTGTGCGACGAGCAATGCTCCGACGAAGGTTGTTGGGGGCCCCG  
CCCCGGCACAGTGTTTGTCTGCAAGAACTTTATTTTAGGAAACGATTGCCTTCAAGAT  
TGTACCGCGCCAGGAATCTACCAGGCGGATGAGAAGACGTGCAAAGTGTGCCACGAG  
GAGTGCGACGGTTCTTGCATAGGGCCGAACACGGATCACTGTAAGAAATGCAAACAC  
GCGCGAGACGGTCCATTTTGCCTGCCGAGTGCCCGGCCTCGAAATATAATGACAACG  
GTGTGTGCAAAAGCTGTACGGGAACTGCGTGCGGTGGTTGCGAGGGGCTGAAAACA  
ACATAGGCCCTAATGGATGCCACAGTTGCGATAAGGCGATCCTCAACGACCATGTACCT  
GAAGGATGTCTGCAAAAAAAGGAGTCCTGCCCTGACG

>novel\_circ\_000861

ACGTGAAACGATGCTGTGAGACGAGGCATGCAAGTAAGGCGGTGAAGAGACAGCGAT  
GGCAGCAGCGGAAACGCTACCTCGAGGCTCTTCCGATCTTCTCGTTGCTCGTTACTATC  
GAAGAGAGGACGAAGAAGTGGGAATCATTGTGAGATCACCTTGGCAAGGTCCATGG  
GTTTCGTAGAGGGCATGAGAGCTCATCATGTTTGAACACCGACACAGGCCGCGAACGCT  
GTCGACCTGCAACCTCCTCGGCGTGACATTTCTTCTATTGATCGTCGCCGGTAGCTACG  
ATGTGTCAGCGGATCTCAACTCCGAATTTGTCAAAGGAAAAA

>novel\_circ\_000862

ATCGACCAGAGAGAGAGATGAGATTGATCGTGACAGTGAGATATTTTATTTACGTATT  
ATTATTATTAAAATCGTTACGAAAAATTTTATATCTTAACTTTTTTTTTTGATAAAATTTT  
TTCGAGCGAATCATAATATAAAAATTATCACTTTATCGTTGATCATACTTTTTTTCAAATA  
TTGCTTTTCAATAAATTTTTCGAACAATATAAAAATCATCACTACGTGAAGAAACACTTT  
CACGATGTTTCATTGTTTTTGTCCCAACGAAAGAAATTTTAAATTAAAAATAATAAAT  
TCTGAAAAAATTGGAATTACGCGTGATGTAACCTCGGTCCCTCTGGGCCCCGTTTGTCTC  
GATCAGCCAAACAAATTACACGTAAACGACGTGCCCTGTCACGCACATTCGTGGCGG  
CTCGAGTCTAATGTCACCCCGGGGGGAGCAATTTTCAGGCATTTTACTCGCGACACAC  
GTTCCACGCCTCTGGCCCTATTGTCTATCCGTACGAGACGAGCGCGCAATTTATCTCG  
AGGACACTGTCACGATCAAAAAAAAAAAGAAAAAGAAAGGAAATCCAGCCTTCCTTT  
TCTCTCGTGACAGCCTGAGAAATTAAATTTCACTTCAATCCGGGAAACGAATTGGAG  
AGGAGAAAAGATTTGGAAGGAAACGAAGATGGATGAGGTGGCGACTACCGGGTTGGC  
CGGAACGGTGACGATAAACTTTCGGATTTTATGTGGACGAAGGAATCCGTTTCCCCGCT  
CGGTCGTCCCGATCTCGCCAACAGGAACGAGAACGAGGGGGAGGAGGGGGAGGGGAG  
GGGAGGGACGGAGTTCGTGGAAGAAAACGATGCCGCAGAACGGCGCAGAAATGCGT

CGTCAACGTGTTTGACAGTGATAACGCGTGCGCGCGTGACCTCTTATCAGCTGCGTA  
AACTCGATCTCGCGTGCTGCTCGATCAGTTGATCTCATGGACGCGGCTGTCTGGAGA  
GACGCCTCACGCTTCTATACCTCCTATACGCGTGTCGGAACGTCTCGCGTGACGTTGAG  
TCGATAATCGTTGTGCGGGCACGTTTCGATCTCCGCCTCGAATCGGCCCCGAAATCGTTT  
TCCGATCGCAAACGGTGGATCCACGTGGACGACGCGCGAGGTTTTCTTTCCCCCGTA  
CGCGCGAAGAAAGTGCAAAACACGTGACGGAACGAATTAGCTTCGGATGTTGAGTGG  
TGTTTTACCCGGTACATATGGTCGACGAAAACCTTGAAGACACGGGTTTACACGCTTT  
GAAAAGTGAACGTTCTGTTTCGAAACGTTTTCGAATGTTCTCGCTTGGATTTTATTTT  
GTCAAATTGACAAGTAGACGACGTGAAACGATGCTGTGAGACGAGGCATGCAAGTAA  
GGCGGTGAAGAGACAGCGATGGCAGCAGCGGAAACGCTACCTCGAGGCTCTTCCGAT  
CTTCTCGTTGCTCGTTACTATCGAAGAGAGGACGAAGAAGTGGGAATCATTGTGAGAG  
TCACCTTGGCAAGGTCCATGGGTTCGTAGAGGGCATGAGAGCTCATCATGTTTCAACA  
CCGACACAGGCCGCGAACGCTGTGACCTGCAACCTCCTCGGCGTGACATTTCTTCTA  
TTGATCGTCGCCGGTAGCTACGATGTGTCAGCGGATCTCAACTCCGAATTTGTCAAAGG  
AAAAA

>novel\_circ\_000864

GTAAGTTCACGCGTCCAACTCCGGAGCGGAGAGACTGACCTCAAGGAAGGAGGAGG  
ACGGTAATGCACAAGGCTCGAGGGGGCCCGGAGATAAGGATCGGGTGTTGTTAAGCC  
CGGGCCCCAAAAATCCGGCGCTTAAAAACAAAACGGGGCCCCGTGGTGGTCGTCGCG  
CCGTTTTCTGTGAACGGCCGCGTATGTATAATGGTTGGAACGAGTCTACTCTCGGGGC  
AGGAGAGGAGGCTTGGTCCGTTTGCCTGTGTAATAGGGAGGGGGGGGAAGGCTTAG  
ATCGGGAGGGTAGATTAAACAGGGGGATACACGTGTCAGGCTCAGATTGACGCGATTCC  
ATTTTAACGAATTATCTTGACCCTGTCGGGGTAGGCAGGGTGGAGGGGTGTCGTTTTTC  
TACTCTTTCGTGGAGTTGTATATGTTTGATAGGCGCTTCTCTCCACTTTGGGAAAGAGAT  
AGATGTATATGTTCCGGATTTTTGGACGAAGATCGGGAGGGATGATAATTTGTCCAGTG  
TTTCGTTTTCTGTGAACGGAGACTTTTTTCTTCTTCGAGTTTGTTTCAAGTCGTAGAA  
TCAAATTATCATAGTCTTTTTTTTTCAAAATTGTAGATTCTTAAAGAACTAGAGGATATT  
AATACAGATGTACATTTTAATTATTTTTCGAATAATTTATCGAAAGGTTGCGACACCCAA  
TGAGGATAAAAAATTTTATATTTTATTTAGAGATGTAATAGACATTTTATAAATAGACAG  
TTGCTACGAAAGGGGATAAAATATATAAATATTGTCGATTTGATTCAACTTAATTTTCCA  
CGGTATTACCTACACAAAACGTTCCAAGTCTTATCGCGGACAGTTAGAATTCATAGATC  
GAGAGACTTTAAAGGTTACAATGGTATCTAAATCAAAAGTAACGGGTGATTTCGAGCGA  
GCTTTAGCGCTGGCATCGACTTAGCAACGGTTGAAAATCAACGCTCTTCCACGAAAGA  
CTTGGAGACTCTGTAAATCAATTTGCATGCCCGGTTTATAGAGCGCGTTAAATAAAAC  
GCGGCCCGCTTCGCATTTATGTAAATGGAAAACGTCCACCGTCAGGCGCGACATGCG  
TCTGCACTTAATTCATTTTTCTGCCGGCAATTTTATACCGCGTTGTAAACGGCCCCGATT  
CTTAAAGTGAATACCGCTCGAAGCGAGTATGATTGCCCGCGGCCGTACAGGGACCCCC  
ATGAAAAATGAGTTTGTATAATTTAATAGCACGTCCCTGGCCTCGGCCGATGGTTACA  
AGCGCGAAGATTGATCGATACATTGGACGCGGATAGATAATACGTAGCAACTTCGAAC  
CGAGAGACTCTTCTCTACTTTTTTAATTGTACGAAATTGCCCCCTCGGTCTTTAAAGG  
TTTTTGAACCTCTGTCTATTCTTGGTGGAATTTAGAAAGTTTCACGAGGCCAAACTTTT  
GTAAATAATTTCTTTCGGTATTCTTTTCGTAATAACGTTCTGATATGCGAGAACGCAA  
GAGTATAAAGAAATTTGTGTAAACTGAGAACGTTTATTTACAGGTATATGGGGATATAATT

AACGATTTTTGGAAAAAATAAATGATAAATTCGAAACAATTTTATGGCATATCTTCGA  
GACGGGGATAATTCATGCGAATCCTCTTTGTTTGCACGTAATTTACGCGCAGCCTCGTG  
TCATAATTCGAATTGATGGCGCGATTTGTCTGTGTTTTTCACCGACTCCTCTATAGATTTG  
CCGTGTAGATAGGGTCAGAACCGGAGCTGACAGAACGCATCTCGGGCGCACGTTTTAC  
AAGTTGTTTTACAACCCGGGGATACAACGCCACACGCTGAGAACTCGAGGACCTCTCC  
CTCTCCTCGCGATAGCCGCCGCTCTCCTTTGTCTGGACACGGATTTCGACTTTTCGACC  
AGGTTCCCTTCTGCTTTGAAACCTTCCTTCTGTCTGACACCTTTCCCCGACGTGGTTCGCG  
CCTGATGGACAGTTTTTTTTGCACAACGATTTTCCTTTCTGTTTTCCACCTTTGTTTCGAG  
AAATTTGAGAAATTATACATCCATCTGTCTGATGATGAAGCTTCTTGTGAATGGAAAAA  
AGAGAGGATAACTAAGAGAGAAATTTTACAGTTTTTGGAAAGAGAGTTTTTTTTTGATA  
CAGCATTCCTTTTATCTTGCTCCATTTTATTTTCGTTTAATTTTCCTTATACGATTCAACTG  
TGATTTAAATTAATTTTTCTATTCAATGGAATTTTTTATTATAAAGTATTTTATATTAATTC  
ACTAGATGTTATCAATTGGCTTGATTTGTGAATGGAAAAGAAGAGAGGATAATTTCAAG  
AGAGAAATTTTACAGTTTTTTGGAAAGAGAGTTTTTTTTTGATACAGCATTCCTTTTACCT  
TGCTCCATTTTATTTTCGTTTAATTTTCCTTATACGATTCAACCGTGTATTTAAATTAATTT  
TTCTATTCAATGGAATTTTTTATTATAAAGTATTTTATATTAATTCCTAGATGTTATCAATT  
GGCTTGATTTGTGAATGGAAAAGAAGAGAGGATAATTTCAAGAGAGAAATTTTACAGT  
TTTTGGAAAGAGAATTTTTTTTTTGATACAGCATTCCTTTTACCTTGCTCCATTTTATTTTC  
GTTTAATTTTCCTTATACGATTCAACCGTGTATTTAAATTAATTTTTCTATTCAATGGAATT  
TTTTATTATAAAGTATTTTATATTGATTCACTAGATGTTATCAACTGGCTTGATTTCTACTA  
ATCTAAATATATTGAATGTTGAATTTTCCAATAATAATTATGAATAAAGGAAAACAATAA  
CTTCTTTAATTAATTTCTATAATCAGCTTCATTTTCCTTTACTATATAATTACGATATTATAT  
AAACCCATCGCATTCTCTTATCAGAGATTAACTCTCGAATCCTATCCTCAATTATCTTTT  
GATTTTTCCCTCCATCGATTATTTTTCAAATCAAGAATCATTAATAATTGAAAACAAATA  
TTATCAAGACAATTATCGAGAAAATATAAATTTTCCTTTCTTTTATCGCAACTGGAACCTC  
GCTTTGCTCGTTAACTTTGGATATTAGAAGTAATTAAGCGATCAAAAAGTTTATATATAT  
ATATAATCTACCACGCTCAGAATTTATAATCGATCGAACGGCGCCAGTGGTTGATACTGG  
AAATACTGGATATTCCGGAATAAGAGCACTCTCACTTTGCATGTCGACACTCTTCCGT  
AGTAGGCTAACGTTCCCTCGCCGATAAAAGTGCTCACCGGTTATCGGCCTTAGAAGCATC  
GCGATCGTTCGACCAGCAAATTTTAAGAAACAATCTCGATCCTGTTATGGATATCGTTCT  
ATCTTGAGGTCCTTTCAATGTCCTTCCTTCTCTCTCTCTTTTTTTACAGGAATATTA  
TTAAGAATAATATAAGCGCTTGATTTTATAAATTTTCGATAATCCTTTAAAAGAAATCG  
AGATCATCGTGCAGATTTCAATTTTTAATGACAAACGATAGATCAACAAATTATTTTATTT  
AATCATGGCTATTGGATCTAATATTCTGTCTGAAATTTGCGTAGATGATTTCAATGCAACT  
GGTCCAAACTGACGATGCATTTAAATCATTTTCGATCGATGCATACGTAAATACGTTTTA  
CGAGGAACGTACAATCAACATTACCCCTGCTTCTAGGAATAGGAGGAATTACGACGCG  
GCGTGTACACGTGTACACTGAGTAATGGAAGGAAGAGCCGCCTCAATTATCAAGCTCG  
TTTGATCAACGTTGTTTACAGCGTCTGGCCGCCCTGCCAAGCGTTTATATATCCAGGA  
CGCGATTTTACAGCCCATCCAGCGCATCGCGTAGTATAAAAGCACGCGCGTGCCCCCTCT  
CGAAGGAATAATTCTTCATTAATTGCGATCGCATGCGCGGTTACATCCCACCCTTCGA  
GGATGCGCCTTGATGCATTTCCAGGCTAATATTTTCGTCAAATAATACATAATATAATTT  
CTGCTCTCTTACAGATGATGATCTCGTCGTTACATCAACCTGGTCGAGTGTTATAAATAT  
AAACTCCATAACGTATTATGGAGGAATAATAAGGGGAGATTGAGCGCGAGCCATAAAA  
GTCGTGGTCGGGTTTCGTGGTCGCCATCATAGAGAGGGCTATTCTATTGTCTCATATCTCT

GGAACCGTATCGAGGGAGGGGGGTGAAAAAAAAAGCGCGTCTGCCGAACGTTCTAGAC  
TGTGAGGATCCTTTGGACCTGTCGTCCGCGGGGAAACGCTGTCCTGTCCTCGAAATTC  
TCTCCCTCCTCTCTCCCTATCCTTTCCCTACGCTTGGATTCTTTTGTTCGCCGCGCGGA  
ACCCAGTCGAGATCCTATCTGACGTAAATAATTATCCTGGAGAGGCTGCAGATGCCCG  
CGTTCGAGTGGTACCCCTCTCGGGGATTTTCATTTTAATCGTGGATCTCGGGACCGCGG  
TTCGAAATATTCTGGATAATTGGGGAGGAGGAAACTGGAGTTTGGAAAGGATCAAAG  
TGATCAAGCGGCGATGTGTGTGTCCATCCCTTTTATTTTAATCAAGGATCTTGGCAACG  
ACGGAAATATTCTTAGTATATCTTTCGATTGTTTGTATTGTATTATTGAAAATGAATAT  
TTAGATCAATAAAGTTAAAATTCTCGAAATTCGAGCCAAGGATCTTGATTATTGGGAG  
AGTGAGGCAAAGATGTGCCTCGCTTTCTCTCATTTCTTTTATTGTATTTCATCATCAAAA  
TATCGACGAATTCATAATTTAACGTGGACGATTATCTCCTCAATATATTATTTATTTTCC  
AATGTTTACATCTGTTGGTGCGTTTTTATTTTCGACCAATCGTGACGTAGAAGGAAAGTG  
GGAATTTTCAGAAATAATCTTTTAACGGTGCAATCTCAGCGGCGGAATCAAGTGATTGC  
GGGGTATTGTTGTGAACACGGTTTCCTTTTTTAGCGTGAACGAACCCGATAAGGAACG  
GTTTTATGGCTCACGCGTAATTGAACTGCGAGCAGCTTGATTTTCGTTTTAAGGATACGG  
GTCGTGAGAAGCGATCTGTTTTGGAACGTACTATACTCGAAGCTTGATTTCAGATCGAC  
CAGAGAGAGAGATGAGATTGATCGTGACAGTGAGATATTTTATTTACGTATTATTATTA  
TTAAAATCGTTACGAAAAATTTTATATCTTAACTTTTTTTTTTGATAAAAATTTCTTCGAG  
CGAATCATAATATAAAAATTATCACTTTATCGTTGATCATACTTTTTTTCAAATATTGCTTT  
TCAATAAATTTTTCGAACAATATAAAAATCATCACTACGTGAAGAAACACTTTCACGAT  
GTTTCATTGTTTTTGTCCCAACGAAAGAAATTTTAAATTAATAATAATAATTCTGGA  
AAAATTGGAATTACGCGTGATGTAACTCGGTCCCTCTGGGCCCCTTTGTCCTCGATCAG  
CCAAACAAATTACACGTAAACGACGTGCCCTGTCACGCACATTTCGTGGCGGCTCGAG  
TCTAATGTCACCCCGGGGGGAGCAATTTTCAGGCATTTTACTCGCGACACACGTTCCAC  
GCCTCTGGCCCTATTGTCTATCCGTACGAGACGAGCGCGCAATTTATCCTCGAGGACAC  
TGTCACGATCAAAAAAAAAAGAAAAAGAAAGGAAATCCAGCCTTCCTTTTCTCTCG  
TGCACAGCCTGAGAAATTAAATTTCACTTCAATCCGGGAAACGAATTGGAGAGGAGAA  
AAGATTTGGAAGGAAACGAAGATGGATGAGGTGGCGACTACCG

>novel\_circ\_000865

CACGATGCCCTCAGATAGTATGGATGACATCGAACTGAAAAATATTCAACTGCAATTTTC  
CACCGCTGAGATGTCTATCGAGAGATGACAGTTCCGTGCGAGAGGAGAGGGTTGAAA  
CCGACAAAGGAAGTATTTTGGTGGCTGTGCAAGGGAATCGAGCGAAACCTGCCATTCT  
CACTTATCACGACTTAGGCCTTAATAATATATCGAGCTTCCAGGCGTTCTTCAATTATATC  
GACATGAGAGTTTTACTGGAGAATTTCTGCGTTTATCACGTGAATGCACCTGGCCAAGA  
AGAAGGTGCACCCACGCTGCCTGAGGACTACATCTATCCGTCCATGGACGAGCTGGCT  
GAACACCTGCTCTTCGTATTGAGCCATTTTGGGCTGAAATCCGTAATCGGTTTTTGGAGT  
CGGTGCAGGGGCCAACATACTAGCGAGATTTCGCACTCGCTCATCCCAGAAAGGTCAAT  
GCTCTTTGCTTGATAAATTGCGTGTCGACACAAGCTGGCTGGATCGAATGGGGATATCA  
GAACTGAACGTTTCGCCACTTGAGATCGCAGGGGATGACTCAAGGTGTATTGGATTAT  
CTGATGTGGCATCACTTTGGCAGGGGCACGGAGGAAAGGAATCACGATCTTGTAACAAG  
TGTACAAAAATTATTTTCGAGCGTCGCGTGAATCCGACGAACCTGGCATTATTAATCGAC  
AGCTACGTTTCGCCGTACAGATCTGAACATCACGAGAGAATTAGATCCTACGCGTAAGA  
AGGAAGGCCTCACGCTTGGTGTACCTGTGATGAATATCACAGGAGCTTTGAGCCCACA

TGTCGACGATACCGTCACGTAAATGGACGATTAGATCCGATGAATAGCTCTTGGATGA  
AGATTTCTGATTGCGGAATGGTACTGGAGGAGCAACCGGGCAAAGTAAGCGAGGCCTT  
TCGACTATTTCTGCAGGGGGAAGGATATG

>novel\_circ\_000868

GTGGCGTGATGTTGCTGATGCGATGTAATTTCCACACGTCGTCGAGTGGTTATGCGATG  
CATGAAGTTGTGTTTCGTCGTGTGAATTTTCGATGATTGGGTAGTTGATTGGGAATTGGA  
TCATTTTAAAATTTTGTAGTCGTAGTGAGTAGTAATTATTATCACATTATTTAAGTTTTATT  
TTATAAATGTATTGTTGTAATTGTCTGAAATGTGCAATGATGTTCAAGTATCTTATCTATAT  
TCATGTTACAGATTGAAGTGTTTAAATTATTGCATAAAAGTGATTATTCGAGTAAAAAGA  
TAAGTAAATTGAATTTGGTATTTATATAATTTAAATATCGTCAAACATAAATGAAAATTTA  
TGTTTCAATCTATATTTAATAAATATTTTGCTACGTAAACATCATGTATTTATATTTTATATC  
ATTCGTATGAAATATAATTAATTTAACGTTAATTAGATTTAATTCAACGAGATATATTACTA  
ACAATATATCCTCTTTTTTGTTCAGCTTGATGATACGGCGCTCCAGCTCTACAAAGATG  
GCGACTATGGTGCCTATTTGGACCTCGAAGCTTCCATCAGCGAGCAACAAGAAGAATT  
CGAAGGGTTCCAAACCAA

>novel\_circ\_000872

GTATTCCTCCTGACCAACAAAGATTGATCTTTGCTGGAAAACAATTAGAAGATGGTCGT  
ACTCTTTCCGATTACAATATTCAAAAAGAATCTACACTTCATCTCGTTCTACGACTTCGT  
GGTGGTATGCAAATTTTCGTTAAGACTCTTACCGGAAAAACCATCACTTTGGAGGTTGA  
AGCATCCGATACTATCGAAAATGTTAAAACTAAAATTCAAGATAAGGAGG

>novel\_circ\_000873

GTATTCCTCCTGACCAACAGAGATTGATCTTTGCTGGAAAACAATTAGAAGATGGTCGT  
ACTCTTTCCGATTACAATATTCAAAAAGAGTCTACACTTCATCTTGTTTTGCGACTTCGT  
GGTGGTATGCAAATTTTCGTCAAAACCCTTACAGGAAAGACTATTACTCTCGAAGTTGA  
AGCTTCAGATAACCATTGAAAATGTTAAAGCCAAAATTCAGGATAAAGAAGGTATTCCTC  
CAGATCAACAGAGATTGATCTTTGCCGGTAAACAACCTGGAAGATGGTCGTACTCTTTCC  
GATTATAATATTCAAAAAGAATCGACCCTTCATCTCGTTCTACGACTTCGCGGTGGTATG  
CAAATTTTCGTCAAAACCCTTACAGGAAAGACTATTACTCTTGAAGTAGAAGCTTCTGA  
TACTATTGAAAATGTAAAAGCTAAGATTCAAGACAAAGAAGGTATTCCTCCTGACCAA  
CAAAGATTGATCTTTGCTGGAAAACAATTAGAAGATGGTCGTACTCTTTCCGATTACAA  
TATTCAAAAAGAATCTACACTTCATCTCGTTCTACGACTTCGTGGTGGTATGCAAATTTT  
CGTTAAGACTCTTACCGGAAAAACCATCACTTTGGAGGTTGAAGCATCCGATACTATCG  
AAAATGTTAAAACTAAAATTCAAGATAAGGAGG

>novel\_circ\_000874

GTGGAATGCAAATTTTTGTCAAAACACTCACTGGAAAACTATTACTTTAGAAGTTGA  
AGCTTCAGATACTATTGAAAATGTTAAAGCTAAAATTCAGGATAAAGAAGGTATTCCTC  
CTGATCAACAGAGATTGATCTTTGCCGGTAAACAGCTGGAAGATGGTCGTACTCTTTCC  
GATTACAATATTCAAAAAGAATCTACACTTCATCTTGTTTTGCGACTTCGTGGTGGAAATG  
CAAATTTTTGTCAAAACACTCACTGGAAAACTATTACTTTAGAAGTTGAAGCTTCAGA  
TACTATTGAAAATGTTAAAGCCAAAATTCAGGATAAAGAAGGTATTCCTCCTGATCAAC

AGAGATTAATCTTTGCCGGTAAACAACCTGGAAGATGGTCGTACTCTTTCCGATTACAAT  
ATTCAAAAAGAATCTACACTTCATCTTGTTTTGCGACTTCGCGGTGGTATGCAAATTTTC  
GTCAAACCCCTTACAGGAAAACTATTACTCTTGAAGTAGAAGCTTCTGATACCATTGA  
AAATGTAAAAGCTAAGATTCAAGACAAAGAAGGTATTCCTCCTGACCAACAGAGATTG  
ATCTTTGCTGGAAAACAATTAGAAGATGGTCGTACTCTTTCCGATTACAATATTCAAAA  
AGAGTCTACACTTCATCTTGTTTTGCGACTTCGTGGTGGTATGCAAATTTTCGTCAAAA  
CCCTTACAGGAAAGACTATTACTCTCGAAGTTGAAGCTTCAGATACCATTGAAAATGTT  
AAAGCCAAAATTCAGGATAAAGAAGGTATTCCTCCAGATCAACAGAGATTGATCTTTG  
CCGGTAAACAACCTGGAAGATGGTCGTACTCTTTCCGATTATAATATTCAAAAAGAATCG  
ACCCTTCATCTCGTTCTACGACTTCGCG

>novel\_circ\_000875

GTTGAGGCCTCAGATACCATTGAAAATGTAAAAGCGAAAATTCAAGACAAGGAAGGA  
ATTCCACCAGATCAGCAAAGATTGATCTTTGCTGGTAAACAATTAGAAGATGGGCGTAC  
ATTATCTGATTATAATATTCAAAAAGAGTCAACACTACATTTAGTACTACGTTTAAGAGG  
TGGAATGCAAATTTTGTCAAACACTCACTGGAAAACTATTACTTTAGAA

>novel\_circ\_000876

ACAGCGAATTAGAGCCACCGTTTCGACGAGCTATTTCTCTTAGGCTACCCAAATCATCG  
AATCAAACTACTATTGATCGCAATCGATTATATGTATCGACATATCATGGAAAATCATCGA  
TGTCCATGACATGGACACCAGACAAAACCATAACAGTTTGTCCCGCCAGGCATTCCAC  
ACCTACGATTGACGCACCTGCGCCGGAATATCTTGCCCGAAATCTTCTTCAACTTGGTT  
GTCCTGTTGTGTCAATGCCCACACCTCGTGGAGGAGTAGGGTCTGAACCTCCGCAGAG  
TAGCGATAGCGATGAATACTCGACGACGAATACTCAACAGCATAGTCATGGACATGGAT  
ATGGTCAAGGACAGGTGGATATCTACAACGTGCCCAAAGTCCAGGTGTCGGGACCATC  
GAACAATGATGAATCCTCTTCCGTCATCAATGG

>novel\_circ\_000877

ATCCATCCGCTTCCGGTTCTTCCTGCGAGGATGACGAGGAGAGTCGGCAGGTGGACAT  
CAGGAAACGCAAGAACAGTTTGTACGCGTCTACCTCGACGCGCGCTCCATCAATAGAC  
AGGGAGAAAGAGTTGAGCTCCGCCGAGGGGGCGTTGGTCGACTGCGTGGCCCTGGTT  
CATCTCACGGATCAATCGCCAACCGAGTCCAATCAACCGGTCCGTCATCCATCGCCCTA  
TTACTACGGCGACTTGTTCAAGGTACCGGAGCAAATAAGCAAATCACAGCCGAACAGG  
TATAGGAAGAGCGTGAGCCTCGACGTACCGGGTGAACGGTCTCGAACACCCGGTATAC  
CGAAGAGAACTCGGTGGCGGGTGATGGGGGTTTCCTATTTCGTCCCAGCAACAGCAAC  
CGAACAGCAGCAGCAATCACAGCAGCCGCTACATTATCAGCAGCAGCAGCAGCTACA  
GCTACAGCAACATCAATTACAGCAACATTATCAAAGTCAGGATCTAGTGAGCCCCACGT  
CGGGGAGCGAGCATGCTGTCCAGCCAGAAGCGAGATCCTCTCGTCGTGCATCATCAC  
CGAGTGGGATCACACCCTCATGCCTCCTCATAGATTGTTAAGCCATGACCTACCGACCA  
CCGTTTGTACCTGCGTCGCATCGGCTGAGGAAGAGGAGGATGAGCTAGATCAACGGCA  
GCCGAGTTAACGCGGCACCAAGTGCGCAAGTTACGCCGTACACGGAGGATAGACCC  
GCAGCCGATACTCGTCGAGGACGAGGACGACGTGGAGGGAGAGGACGAGGGCGAGG  
AAGAGGAGGAGGAGGACGTGGAGGTGGAGGAAGACGAGGAAGAGATGGCTAGGCA  
ACGTCACCTCTACGAGACGGCCTTCGACTGCAAGGTCAATCGCTCCGACGATGACCTC



GATGACCTCGATCGGGTCACCAATCATCCCGTGTTGCATTCCCAGATAAGAAGCAGCA  
GCGCGATACCAGTGAGCAGAACGAGTTCATCGACGGACACGTCGAAGCAACAGCAAC  
AGCAGCAAGCTCCGTACGCTGGTCAATCCCACAGCAACAAAGATCGACGCAAAGTCG  
TACTTCTCCGCCCAAAACCTATTCAGAGCCGTCTTCAGCAGCAGCAGCAGCAACA  
GCAGCAATCAGACAATATTTCTACTCTGTCCCAGGACATCGAATCCCTCCAGATCAATT  
CGAGCGACGAGAAGACCGGTTCCGCCGAGATTACCGGCCCGTGGTTACACACCGTCGC  
CGCCATCCACGGCACCGTTGCCCGCCAAATTCCACGGCAATCGTGACCACTTGTTGTTA  
AACATACGAAGCACGCCCAATCTACCCTCTCAACCGGACCATCCGCGCCTCAAAGATC  
TCCGATTGCCTGTGAAATCCTCGTTGAGGGCGAAGGACTCGCCGCAGAGCAGCGAGG  
GTAGTATCCTCGAGATCAAGAGTAGACCGAAGAGTTTTGCTCAAGAAACCGTGGAGTC  
GTCGCAAGGGCGACGTTTCGACAAGGAGTTGATCCTAGAGTTCAAGGGGAGGCCGAG  
GGAGGACAGGCAACGACCGAGGAGCCTGATCCGCGAGAGCAAGCCCATCATGGAGTT  
CAAGGGGAGGCCCCACGAGGCCGAGAGCGATCTGTTACGGCCCCGAAGGGACGTCCG  
CCTGTTGGAATTCAAACTGCGCACCCAGCAGACGCAGACCAGGCTACTCGAGCACCGA  
GAGCATGGCCACGAGTAGCAGCGGCGGCAGCATGGAGTCGCTGCGAAGCAGCACGAG  
CGAGGGGAACAGATCGACTAGCAGCTCGGAGAGCCGTCACAGCACCGCCTGAGCTC  
CCACAGCTCGGACAGCGGCGGCACGAATTGCTACCACCACCACCAGCAACCCTCGAT  
GACCGGTTTCTTGACCCACCACGCGAACAAGCTGCACATACTGTCCCCCATCTCCGAC  
AAGTCGTCCCAAGAGCCCGCGTCCGAGACGTCGGACAACAATCGGAACAACAACCTCG  
CAGAAAGCCTCGCCGAGGAGAACGTGACCACCGAGAACAACGTGACCGCCACGAA  
CAACGTGACCAACACGAACACGACCGGGAACACGAATTCGGTTACCTCGCCGATGGA  
CACGTCGTTCAAGAAGAGGCGGACGCCGAGAACAAGAATCTGATCAATTTGGCGTT  
GCAATCCTCGTCGTCGGGCGATGCGGAGATCCAGGGGTCGGACAGCGGGATCTCGATC  
GAGTCGCGGGCCGGGATCAAGTGCAAACCGTTCCGTTTCCACTTGTTGAAACCGCAAT  
TGGACAATATCAATCTGGTGGACAACGAGCCCGAGCTGTCCGATCTTCCTTTGACATG  
CCGAAACTGCGTAGAAGGCGATTGCTTATGCAACAGGACGCGACCACATCTGGGAGC  
GCGACGAGCGTGGAATTTGAGGGACTTGCCGTTTCGACATGCCGAAACTGAAAAGAAGG  
CTCAGATGCATGCAGAGCACGGAATCCAGTGGATCCCAAGCATCCTCCAGCCTTTCCG  
TGC GTGACGTCGAGCCGCCTGCGTTGTTCG

>novel\_circ\_000878

TGAGGACGCTGGGCGTAGCGGCGACGAAATGAAGCATGCAGCATGCGTGGTAGCGGT  
GACGGCTGCGCGGTCTGCCTTCAACCCCTGGTGTCCGCCAGCCGCTACCTCGCCGTT  
CAAGCCCTTCCTGGTGATCCTCTTTACTTCGTGCTTGAGGCGAAGTCGAGAGTGAAGG  
AGGTGTACGCGCAGACATGCATGCTTCTCGGCCAGCAGGGCATGCGAGACTGCGAACT  
GTTCCGGCCTGGCAATATTGTCCGACGGCGAGTACCTGTTTCGTCGATCCCGAGAATAAAT  
TAAGCAAATACGCGCCGAAAAACTGGCGGAGCTCTCATAACATAC

>novel\_circ\_000879

ATTTCGTACGAACCGTGGTTGCACGGTACGAAAGGCACCGAGAGCGACGAGGATGAT  
GTAGCCGTCCGGCGGCTGCCGATTCACGAGAATAAGCATCGAGAGGATGTACACGAAC  
GAACAACGTGCACGAACAAACGAGAACGAGTTGTTTGTGCGGATTCCTCGAGCCGAT  
TCCATTCGCGTAACGCGTTAGAGAATAGAAAAATCGTGACCAAGAAAGAATCATAACT  
GCCAGATATATAATTAAAAAATAATCCTTCCGTTCCATCCTGAGAAAAAAGAAA

AAGAGCAGAAAGAAGAAGGAAGGAAAAAAGTATCTCTCTCCGTTCTCACCCCTCTTTC  
GAGATCAAAAAGACTGAATATCAAAGAGAGGATCAAGATGTTGGGAGTGAGTCAACC  
GGGAAACCCACCCTCGAGCCTGCGACACTCGGCGAGTTTCTCGTGTCTTCAACGGGG  
CACGGCGAGCGAGGGACACAGGGCGAGGACCTCGACTCTGCTCCAAACACAGCCGA  
GCCTCCAGCTGAGCAACAGCCATCACCAGGCGTACGCGCCCCGGCCAGGCGACCTCGT  
CCCTCCTCCAACAGTCCTCCTCGGCCGTGGGGACCGTTCAACACCGCATCGAGGCGTT  
GGAAGCCAGCACCGTGCAAGACACCGGCAACGACTACGGTTTTCGTCAAGCTACGCCC  
ACGCCTGCGTAGCACCAACGCCACCCTCCACTACGAGGAGGAGCTGGCCGCTCAGAG  
GGGCGCTATATGGGACCGGGACGCGTCGGCGTTTACGCGACCGCGAGTGCGACGGCAA  
TTACAGGGGGGACCCGCCCTCCCTCAAGCTCAAGGACAACAGGGAGCACTCGCCCAA  
GGGCGGGAAGAATCAGAACCCGCTCAGGGGCGCCCTCGTACTGTTACCTCGACCTC  
GTCGTGGTGGAAGGCAAGGCAACGGGAGGATCAGCTGAACGGCGGCGTGCGGGCGG  
CGTTCGCTCCTCGTCCGAGCGAAAGTGGTCCAGCACCTCGATGGCGTCCCCCTCGAA  
CGAGAGAAAGTGGCCCTCGCTCGTCACCTCGCCCACCAACGATCGCAAATGGTCCCTT  
GCGGCCAACAACAACAGTAATAACAACAACAACAGCAACAACGCTTTGACGTCTG  
CCGGGTAACGAGAGGAAGTGGACGAGATCGTCGGTCACGTCGAACTCGGGCGGGCAG  
CAGCAGGACAGGAAATGGCGGTCTGCTCGGCGCCCTGTTGAGGGCCCCGACCGGGGCA  
GCGACGCCCCGCTCGCACGCGCTCCAACACTCCTTGTCACCAACATGAGCGTCTCGA  
TGATCGAGGACCACCACTTCAGGGAGGACGCCCCGGGGCTCGGCATCGTGCAAGTCGA  
CGCGTTACCAACAACCGGCGGCCACCTCGTACTCGGCCCGGGTGTGCGCGCTCACCCG  
GGACGTTTACAGGGAGAACGGGTCTGAGTTCTGGGCAGGCGGGGGGCAGGTCGAAGG  
TGAGCCGTAGGCTGTATCAGGAGGATTGCTTGGACAGGGACGGGGCGGAGGAGAGAT  
CTCACCAGGCGCCGAGGCAGCAACACCAGTTTCGACGAGGAGTGACAGGGGAGGGCGC  
GCGAATCGGGAGAGTGCAATCTGCAAAACGGAGCAGCAGACGATGAACGAGACTGCG  
GGTGGCACGCGCGCTTCCACGACGAGATCGAGCCGGGCGCAAAGCTTCTATCTCCTCG  
ACGATTTCTGCGGCCCCAGCCCCAACAGAACAACGCCACTAATAATAACAATAACAA  
CAACAACAACAAGTGCATGCTGAACGTTTACCTGTGCGCGTCGCACGCCGCGTCCAAG  
TCCACGTGTGGCGGCAACGATCTGCTGCACTCGGGCAGATCGGGCGACCAGGCGAAG  
CACCAGGTCCCCCGCAGGCAGGGAGCGCCAACGTGACGAACATCACTCCGCCGCGG  
CGCCACAACCTCAGCTCGGACAGCCTCGAGGTCGCGACCAGTCCGCTTCCGCCGCTT  
GTCCCGCCCCCGCCACCTCAGGTCGCCGCGACCCGCGACAGGGAGAGGGCGGAGAAT  
TTGAAAGAGAAGGACGTGTGCCAGTGCAAAGTGTGCTGGACCAATATGCAGCAGCAA  
AGATGTTTCGTAGAAGAG

>novel\_circ\_000880

CTGGGAGATTGCCAATGACAGCTCCAGAAGCACTCAAGTATTATGGCTCGAGGCTCAC  
CGAATTTGAGCGCAACGAAATCGAGAAATACTCGGAGATTTGGTACCTCGGCCTGTCTG  
GCCACGAAAATTCACGGCGAGGAGGGCTCATCCCAAATGGTGGATACGACGACGAA  
AACGGTAGTTACAACAAGGTCTTCCACGATCATATCTCGTACAGATACGAGATATTGGA  
GGTGATCGGGAAGGGAAGCTTCGGACAAGTGATCAGAGCGTTGGATCACAAGACGGG  
ACAGTACATTGCCATCAAGATCATCAGAAATAAAAAGAGATTCCATCATCAGGCGTTGG  
TCGAGGTGGAGATTTTGAACATCTCAGGAAGAAAGATTTAGAAGCGAATGCGTCGCA  
CAATGTGATACACATGCTAGAATACTTCTACTTCAGGAACCATTTGTGCATCACCTTTGA  
GTTAATGAGTTTGAATTTATACGAGCTAATCAAAAAGAATAACTATAAGGGATTTAGTCT

GAGCCTAATACGACGATTTCGCCAATTCTTTAATTAGCTGCCTGAGACTGCTGTACCGAG  
AGAAGATAATTCAATTGCGATTTGAAACCTGAAAACGTGCTTCTGAAACAGCGGGGTAG  
CAGCTCGATTAAGGTGATAGACTTCGGATCCTCGTGTTACAGCCATCAGCGTGTATATAC  
ATACCTTCAGTCCAGATTTTATCGTAGCCCGGAAGTGATTCTGGGCCTTCCATACGGTAC  
ACCGATCGACATGTGGAGTTTGGGCTGTATCCTGGCCGAACTCTACACAGGTTGCCCTT  
TGTTCCCGGGCGAGGATGAAATCGAACAACCTTGCCTGCATTATGGAAGTTCTTGGCCT  
GCCACCGGAACATATTATTAATCACGCATCCCGTCGCAGGCTTTTCTTCGATCCGAAGG  
GAAGTCCTCGATGCGTGACGAACAGTAAGGGCAAGAAGAGATGGGCTGGTAGCAGGA  
ATCTTGCCATAGCTCTTCGTTGCACCGATACACTTTTCGTCGACTTTGTTTCGAGATGCC  
TCGAGTGGGATCCAAAGAAACGCATGACCCCCGACGAGGCGATGCGTCACGAGTGGC  
TGAACGTCCTCGTTTCACGTGAGCTCCTCGACGTCCACGATAGCCGCGTCGACGGT  
GAACGCGAACACGAACGCGAACGCGAACGCAACTAGCATGGAAACGTCGTCGCAATC  
CGCCACGCTCAAACGGTGAGCGTGACGGTGAGCGCGCCGAGGCAACGGGCGACCA  
CCGTCGAGGATCCCCCGTACACGATGTACCGTTTGTGCAAAGGTCGTAAGTACGTGCA  
GAGGATCAGCACGACCGAGAACACGGACAACGGGGGCCTCGTAGTGAAGAGCAAGC  
TGAACGGAAGCGCGAGCAGCCACGCGCTCGCGAGTAGCACGCAGACTACTACCTCGA  
GGCACGCCTCGACCGCGATATCGTCGCGAGTCTGGACCCAAATCTCGACGATTCCG

>novel\_circ\_000881

CTCTAGTATGAGTTCTCGAGGCCGTGGATTTAATTCTCGGGGAGGCAGTTCTTATAGAG  
GAAGAGGTGGAGGTAGTGGAACGAATGGAATAGTGGATCAACAGGAGGAAACATGT  
CTAGCAGAGGAGGTTATTCCTCATCTAGAGGAGGTCGATTTAAATATTCAACTACTAGTT  
ATGATTCGCGTTCAAATATAATTCTGGAGGTTTCAGAAAGATATTCTAGTAGAGGAGGA  
AGAGGTGAACATTCAAATAGTTACAAAAGACCAAGGGATTCTTATTCTGGAAGAGATG  
AACATCGTTCATCAAGTGATTCAACTCGTAAAAGGATGAGAAGTGATTCATATCAG

>novel\_circ\_000882

CACAAGAGTTATCAAGCCAAACGGGCCGACATTGGTCGTAAGGTGAAGGTAAAATC  
GACTGGAAAACCCATACCATCATCATCAAATTCAAGACATAGGGAATCAACGAGCATT  
CAACTTCTGGAAGTCAGGCTAGACTGTCGTCTTCCTCTTACAAACCGGCTAATCCAGC  
AGCGGCTCGAAGCCAACCGGAGAAAAAATCCCTGACATTATGCGCAGACCATTAA  
AGAAAGACTTATTCATCTTCTTGCTTTAAGGCCATATAAAAAACCTGAACTGTATGATCG  
TATAAATAGAGAGGGTTTAAAGAACGAGAGCGTAACATCATGACGACAATCTTAAAG  
CAAGTAGCTTTTATGAGGGATAATACGTATCATTTGCACAGATATGTTTGGAATGATGTG  
CAAGAAGACTGGCCTTATTATACCGAACAGGAAAAGGCAATGTTAAAAAGAAGAAAA  
CCTCAAAATCTTACACCTCCTGGTTCCAGTGATGGTGGATCAAGTGGCAGCGGACAAT  
CGCCGAATCCACTCATCCAGGTTACCCGCCTGCAATCACAGCACCACCTCCATCTTTG  
TTGAACAATAAGCGACCAGGGTATTATCAGGGAAATGATGGGCTGCCGACGAAGAGAC  
CACGGATATCCCATTATAAGAAGTCAGAACAAAATTCTGGATCGTCGATCACGGGAGA  
GAACGGAAGGACGGCTGGTAGTGGTAATAGTAATAACAGTGTTAGTGTTGTTTCTGGA  
GCTGGTAGTACTAGTGCTAACGGTGGCAATAGTAGTAACAGCGGTGGTGTGGTTGATG  
GTTGGGATCAGAGACAGCACCAACGTGATCGTCGTGGCGATTATCGGCCCGAAAGAAC  
AGCGAACAGTGACGTGCTACGAAGCAGCAGCTACAGCACTGGGAAGCTACCGTGCTT  
GACACCAACCAGTGACAGTGAAGAGATCAACCAAACCTGTTGGTCATCGGGACGGAAT

CATAACGAGCACCGGTTTCATCCGGAAACAACGCAGCTAGCAATCCGGCCACTGGCCAT  
AATTCTCATAGTATAGCCCATAGTAATTCATTGAGCGGCAATCGTCATCATACAGGCAAG  
ATCGGTACCGATACCGGCAATTCTGGGACGGATTATGTGACCGGTCTTATGCCAAGTGT  
CGTGAGTGACGGTGGTAGTAGTGCAAGTAGTTTTAGTGGTAGTTCGAATGGAATACTC  
GCTGATAGGAGAGACAGAAGCGACAGGAATGACAGGAGCCGGGCAAGCGAAAGGGA  
TCGTGACTCAAGAAAGAAAAGCAACGGGACAGGTGGTAACTCCTACAATGATTAAACC  
GCCCCTGATTACACAGCCACCGAGGATAACACTGTGTCAGTACATCGTCTTGTGCTCTTGA  
ATTACCTGAAAGTCCTAAATCGTCGGAATATCCGGACTACCTCACGTATTACACGACAAT  
AAGTAGTTCAGAACAGAGAAGACGTTACAAAGCAGAATTTAATGCTGATTATGAAGAG  
TATCGACGGTTGCATGCTCAAGTAGCAAATGTGTCTAAACGGTTCACGCAGCTTCAGG  
AACGTTTGAAACAAGAAGAAGCCTCTGGGAACTGGGAAGAGTACGAGGAAGTAAGA  
CGGCAAATTTTGCACGACTATAACGAAACTAAACGGGACCCTGTACATAAAGAGATAA  
AACGTCGATTTTATTATCTGCACGAGAAGCTAAGTCACATTAAACGGCTAGTATTGGAG  
TACGACACGCAAACTGTGGCGGTGGGATGACAAATAGCAGTAATGCTAATGGTACCA  
ACGAAATTAAGGAGATGGACAGTTTGCCTACTGACACAACTGAAAAGGCCGCCTC  
TTATATTCAATCTTTTCTCAATTGTCG

>novel\_circ\_000883

CAATTGTCCTTCCCATCTACGCAATCCAGCCATGGATCAGCAGGCTTTACGTTTAGCCTT  
TCTGGCAATCAAGACATTGAGGGTCCTCAGGGTGGTTTTCGAATGCATCCAGCAAACAG  
GCCCTAACGTTCCATTTTTCTGTGCAGAAGCCTGGAGAGTCTTGGCGCATTGCCGTGT  
AAAATGCGGATACAGGCGAACGACGATGTGTACGAGACAACCAGGCATCGCATGGCT  
GTCGCCGAGGAGAATAATAAGAACAATGCACAAGAGTTATCAAGCCAAACGGGCCG  
GACATTGGTCGTAAGGTGAAGGTAAAATCGACTGGAAAACCCATACCATCATCATCAA  
ATTCAAGACATAGGGAATCAACGAGCATTCCAACCTTCTGGAAGTCAGGCTAGACTGTC  
GTCTTCCTCTTACAAACCGGCTAATCCAGCAGCGGCTCGAAGCCAACCGGAGAAAAA  
AATCCCTGACATTATGCGCAGACCATTAAAAGAAAGACTTATTCATCTTCTTGCTTTAAG  
GCCATATAAAAAACCTGAACTGTATGATCGTATAAATAGAGAGGGTTTTAAAAGAACGAG  
AGCGTAACATCATGACGACAATCTTAAAGCAAGTAGCTTTTATGAGGGATAATACGTAT  
CATTTGCACAGATATGTTTGGGAATGATGTGCAAGAAGACTGGCCTTATTATACCGAACA  
GGAAAAGGCAATGTTAAAAGAAGAAAACCTCAAAATCTTACACCTCCTGGTTCCAGT  
GATGGTGGATCAAGTGGCAGCGGACAATCGCCGAATTCCACTCATCCAGGTTACCCGC  
CTGCAATCACAGCACCACTCCATCTTTGTTGAACAATAAGCGACCAGGGTATTATCAG  
GGAAATGATGGGCTGCCGACGAAGAGACCACGGATATCCATTATAAGAAGTCAGAAC  
AAAATTCTGGATCGTCGATCACGGGAGAGAACGGAAGGACGGCTGGTAGTGGTAATAG  
TAATAACAGTGTTAGTGTTGTTTCTGGAGCTGGTAGTACTAGTGCTAACGGTGGCAATA  
GTAGTAACAGCGGTGGTGTGGTTGATGGTTGGGATCAGAGACAGCACCAACGTGATCG  
TCGTGGCGATTATCGGCCCCGAAAGAACAGCGAACAGTGACGTGCTACGAAGCAGCAG  
CTACAGCACTGGGAAGCTACCGTGCTTGACACCAACCAGTGACAGTGAAGAGATCAA  
CCAAACTGTTGGTCATCGGGACGGAATCATAACGAGCACCGGTTTCATCCGGAAACAAC  
GCAGCTAGCAATCCGGCCACTGGCCATAATTCTCATAGTATAGCCCATAGTAATTCATTG  
AGCGGCAATCGTCATCATACAGGCAAGATCGGTACCGATACCGGCAATTCTGGGACGG  
ATTATGTGACGCGTCTTATGCCAAGTGTGCTGAGTGACGGTGGTAGTAGTGCAAGTAGT  
TTTAGTGGTAGTTCGAATGGAATACTCGCTGATAGGAGAGACAGAAGCGACAGGAATG

ACAGGAGCCGGGCAAGCGAAAGGGATCGTGACTCAAGAAAGAAAAGCAACGGGACA  
GGTGGTAACTCCTACAATGATTAAACCGCCCCTGATTACACAGCCACCGAGGATAACAC  
TGTCAGTACATCGTCTTGTGCTCTTGAATTACCTGAAAGTCCTAAATCGTCGGAATATCC  
GGACTACCTCACGTATTACACGACAATAAGTAGTTTACAGAACAGAGAAGACGTTACAAA  
GCAGAAATTTAATGCTGATTATGAAGAGTATCGACGGTTGCATGCTCAAGTAGCAAATGT  
GTCTAAACGGTTCACGCAGCTTCAGGAACGTTTGAACAAGAAGAAGCCTCTGGGAA  
CTGGGAAGAGTACGAGGAAGTAAGACGGCAAATTTGCACGACTATAACGAAACTAA  
ACGGGACCCTGTACATAAAGAGATAAAACGTCGATTTTATTATCTGCACGAGAAGCTAA  
GTCACATTAAACGGCTAGTATTGGAGTACGACACGCAAACTGTGGCGGTGGGATGAC  
AAATAGCAGTAATGCTAATGGTACCAACGAAATTAAGGAGATGGACAGTTTGCCTACT  
GACACAACTGAAAAGGCCGCCTCTTATATTCAATCTTTTCTCAATTGTCTG

>novel\_circ\_000884

CAATTGTCCTCCCATCTACGCAATCCAGCCATGGATCAGCAGGCTTTACGTTTAGCCTT  
TCTGGCAATCAAGACATTGAGGGTCCTCAGGGTGGTTTCGAATGCATCCAGCAAACAG  
GCCCTAACGTTCCATTTTTCTGTGCAGAAGCCTGGAGAGTCTTGGCGCATTGCCGTGT  
AAAATGCGGATACAGGCGAACGACGATGTGTACGAGACAACCAGGCATCGCATGGCT  
GTCGCCGAGGAGAATAATAAGAACAAATG

>novel\_circ\_000885

AGAAGTTCGATATCACCCGCGGAACGCGAAAAGTATAGCAGGCCGCGATCAACCGACC  
CCCAACACCACGATCACCTCCCACTCAAGAAGATGAAGAAGGAGCAGGACAAGGATA  
TAGGCCATCAAAGCGATGGTGAAAAGAGCGACCAGGATTTGGTGGTTGACGACGCGA  
GCGAGGGGGCCGACGAGCCCCACGGCGAATGGCACAGCGTCGCCAAGGGAGAACGGG  
CTCGACAAACTCGGCCCGTCTCGGTGCCTTTGAGCAGCCAGGTGAAGAAAGAAGTC  
CCGCCACCGTCGCCGAGAAGCGGCACGAGCAGCAACGCGAGCACACCCTCGGCTAAG  
AAGATGGAAGAAAGAGAAAAACCGACTACGCCTATCTCGAAACCCGTCACGCCCACG  
TCAGCTGGTGGTAGCAGCTCCGGGTCCGGTGGTCTGAAACCATCGAGTTCCAGCAAAC  
CACTGGTCTCGGCTTCGGCGGTTCGGCCCTTATCCGCCGCACTATCCGCCGCCACATCAT  
CCACCCGCAGGACCTCATGTGGACGTGCTGGGTTATCCCCAGCCCTGAATGGATATCC  
CGCAAGACCGCCTCTTCAGCAACTCTACGATCCTCACGGAAGCATGAGGGCTCCTCTT  
GGACCTCTCGGTGTACCCGGTGGAAAACCCGCGTACAGTTTCCACGTGTCGAGCGAG  
GGCCAGATGCAGCCTGTTCCATTCCCTCACGACGCTCTAATTGGACAAGGAATACCGC  
GTCATGCACGCCAGATAAATACCCTGACGCACGGGGAGGTGGTGTGCGCGGTGACGAT  
CTCGAATCCGACTAAATACGTTTACACGGGTGGCAAAGGATGCGTCAAGGTCTGGGAC  
ATCAATCAGGGCGGGAGCGGTAGCGCGAAACACGTTTCGCAGCTTGATTGCTTGCAAC  
GAGACAACCTACATCAG

>novel\_circ\_000886

AGAAGTTCGATATCACCCGCGGAACGCGAAAAGTATAGCAGGCCGCGATCAACCGACC  
CCCAACACCACGATCACCTCCCACTCAAGAAGATGAAGAAGGAGCAGGACAAGGATA  
TAGGCCATCAAAGCGATGGTGAAAAGAGCGACCAGGATTTGGTGGTTGACGACGCGA  
GCGAGGGGGCCGACGAGCCCCACGGCGAATGGCACAGCGTCGCCAAGGGAGAACGGG  
CTCGACAAACTCGGCCCGTCTCGGTGCCTTTGAGCAGCCAGGTGAAGAAAGAAGTC

CCGCCACCGTCGCCGAGAAGCGGCACGAGCAGCAACGCGAGCACACCCTCGGCTAAG  
AAGATGGAAGAAAGAGAAAAACCGACTACGCCTATCTCGAAACCCGTCACGCCCACG  
TCAGCTG

>novel\_circ\_000887

ACAGAGATAGCGAAGAGGTTAAACGCCATAATTGCTCAGATCCTGCCATTTCTCTCGCA  
GGAACACCAACAACAAGTCGCTACTGCTGTTGACAGAGCCAAACAAGTGACCATGAC  
CGAGCTCAACGCCATTATCGGGCAACAAAGGCCAGACCTGCCAAGGCTTCTTCAGCAG  
GTGCACGCCCAACAACCTACCACCTGGCGCCGCGATGGGCCCCGCATCCAGGCATACCTG  
GCCTTCCTGGGCTCGGGCCCTGGCGCTGGTCTTCCCGTTCTACGTACGCCTCCGCAGC  
ACTTCTCGGATTAGGTATTCCACCGGGTGCCGCAGCAACCGCTGGTGGCACAGCTGCT  
CATCCCCTTTTCGATGTTGACCAAGCCGGACATCCATCGTCAAGCGGACGATTTAAAGCA  
CAACGGAG

>novel\_circ\_000888

TTCCAGACTGTTTCCTTCGTTGCTCCCCGAACGGCCCTTACACGAAGTACAAAAAGTAT  
GGTACCGCGACCGGTGAACAGCACCTTACTAACGTCAACGTTGCCTCCGTTCCGTGAA  
TCGGCCGTTCCCGGCTAACGTCTTGGGCTTCTAATATTTACACGCTCGCAGCGCGAGC  
CACCGCCACGATATTCCCAACGTTGACGATAAAGCCAACGGCGTAAAGAACTGAATTG  
AATTTTGC GCGCAAACAGGATCAGTCGCCTTAGAGTGTAATAATGGCGGGGCAGAGC  
GTTGTGACGCGAGCTTTCCCCGAGATACTGCCCTTTTCATGGAACCAGTAATTCGACG  
TTATCTGCGGATGTCCCTTTATGAGCGACGTGCGCGGTTGCGGTTTAACTTCCATTCATG  
TAATTCGATCGTTTCGAGAAGCCCGAGTGTATATAATATAGCCTGTGCATCGACGTGGAT  
AAAAATAAAAAAAGAAAAAAGAAAAAAGAAAGGAAAAAGGAAGAGAGAAGAAA  
GGGAAAAAAGAAAGAAAGAAAGAGAGAAGTACAAGAAGCGTTTGGAGAAGGCTTT  
GACGACACGGAGTAAAAAAGGGCGTAAAAACTTACGAGCACGATAGTTGTTTTTCACC  
TATACGACTGAGGCAAAAGAAAAAGAAAAAAGGATACGGTGTAAGAGGTTCGGAA  
TAAAAGACGCGTGAAAGAAACAAGACACGCAAGTGCTGCAAATCGAGAGAAAGAAA  
CGTAGTGTAATAAAAAAATGTTGCGGTGCTGCTCGCCGCCGGTTAGCCCCTGGGCTT  
GAAAGTCTATTGTCTTCGGTTCATTACACATTTTCAGAAGTGTCTTGCGGAAGGACGGT  
GGGTGGAGGAGGGACCAGTCGCTGACCAGATGCATGACAACGAACTGAAATATCAG  
ATTTCGCGCTAACGTTGCGTCTTTTTACTTACCGTAGTGCGTTTTTCGCGAGTAAGGGC  
CACCAAAGGCCCTTATGGTGGAAAAAAGAACAGCGGGGCGAAAAAAGGGG  
GAAAACATTTTACAAAACGTTGTTCTCCGTACCAGGAAAGCAGGCAGAGGGGGAGA  
GATTGGGATTTTCAGCTCCGATAATAGTCACTTTTGGGGTAACCGAGCGAATCCATTGA  
ATCACCGATCGCAA

>novel\_circ\_000889

TTTCTCGTAGTCATCGATGACGCGTTTAGAGGAGTCATAAGGAAGAGCTAGACAACCTT  
GTAACAATACCAGCCTCCAAAATAATGTGCTCGAAGACGCAAACACGTCAATTAAGTT  
GATTTACAGTTACGAAACGAGACATGGGAAAAAGGACGAGAAGAAGAAACATTTTT  
AACGATAAGCTTTGCCACCGCCTGCCACTATACTTAGGTGCGGGTCTCCTCCGCCTGG  
GAAACTTTTAAAGAGGCCGAAGAAGAATATTCGCAAATGGAGTACTCAAGTTGCAGTT  
TGCGGTCAGTACGCTCATATTATGCAGCCGTGATCTTTGTAGATTACAAACGAAAGTCT

TTTCTCTTAGTGGCGTTCCGGTGATGTTAACTTTTGTGGGCCAGCGGCCGTCCATTAC  
GGTGATAACATTGCAGCCATCAAGCTTACCACACTGCGCTTACTCCTCCCCCATCTTT  
CGAACAAGAAGAAGAAGAAGAAGAACTGCTTTTAATCTTCAAAGAGGATTCTTTTA  
ACCCTTTGTACATAAGTAGATTTCTCCCGTTCCTTGCGAAACGAAATTTATCATAATCCC  
TTGGCGTTTCTTAACTTAAGTAAATACGAATCTTTACGAATATTGTATATACGAATATCC  
ATAATTCACGAAATGAATGAAGGGTATGATAATTTGGCTTTGGAAAGAAGACACGATA  
ATTCTACGAAACGAATAAAGAATTATCGAAAGAGTAGAAG

>novel\_circ\_000890

GTCGGTGAAGCTGTTGCCGGACGGCAGAACGCTGATAGTCGGGGGCGAGGCCAGCCG  
ACTTAGTATCTGGGATCTGGCGAGTCCAACGCCGAGGATCAAGGCCGAATTAATCTCG  
GCCGCCCCCGCCTGTTACGCCCTGGCCATCTCCCCGGA CT CGAAGGTTTGCTTCAGCT  
GCTGCAGCGATGGCAGCATCGCCGTCTGGGATCTTCAGAATCAGTCCCTGGTGAGACA  
GTTCCAAGGCCACACGGACGGCGCCTCGTGCATCGACATATCGGCGGACGGGTGCAAAA  
TTGTGGACCGGCGGATTGGACAACACGGTCCGCTCGTGGGATCTGAGGGAGGGTAGA  
CAGCTGAAACAGCACGACTTCACGTCCCAGATATTCTCGCTCGGCTACTGTCCAACGG  
GGGAATGGTTGGCCGTGGGCATGGAGAACTCGAACGTCGAGGTGTTGCACGCCTCGA  
ACCCGGACAAGTATCAGCTACACCTGCACGAGTCTTGCGTGTTATCGTTGAGATTCGCC  
TCCTGCGGCAAGTGGTTCGTCTCGACCGGCAAGGATAATTTGCTGAACGCGTGGCGCA  
CGCCTTACGGGGCCTCGATATTCCAGTCCAAGGAATCGTCATCCGTGCTCAGCTGCGAT  
ATATCAGCCGACGACAGGTACATCGTTACCGGTTTACGGTGACAAGAAAGCGACCGTCT  
ACGAGGTCATGTATTGAAACCGCAACGAAACCGAACCGTACCAACCAGCCAAACGTAT  
TCATCAGACCCCGAGCAACTCTCCACAGC

>novel\_circ\_000891

AGGAGCTCGATATCGCCCGGTGATAAATATAGTCGCCCCGCTACACCGCAGGAGACGC  
ATCATTTCCCATCATTTCTCAGAATCACCATGACCATCCCATGCACATCAAGAAGATGAAG  
AAAGAGCAGGACAAGGACATCGGTCATAGTGACGGGGAGAAGAGCGACCAGGACCT  
CGTTGTGGACGACGCGAGCGAGGGTCCGACGAGTCCCGTGGTGAACGGCACAACGTC  
GCCAAGAGAGAACGGGCTGGACAAGGTGGCGCCGATAGGCGCCGGGGTGCAGACGA  
AGAAGGACGTGCCGCCCCATTCGCCGCGAAGCGGGACGAGCAGCAACGCGAGCACA  
CCCTCGGCCAAGAAGATGGAGGAACGGGAGAAACCGACCACGCCGATCTCGAAACCC  
CTGACCCCGACCTCCGGCTCCGCGATCGGTGGCGGTTTGAAGCCGTCCGGCTCGGCCA  
AGCTGCTCCAGGGACCACCGCCCCCGGCGTGCCAGCGCTTATCCGCCGCACTACGC  
CCCGGGTCCACCCCCTACCATCTGGCACCAGCTGGCCAGCATCCTCACGTGACATG  
ATGGGTTACAACGGCTACGTGGCGCCAGGGCGCCACCTTCCCTCCAACAGCTCTACG  
ACCCCCACGTGGCCATGAGGGCCCCCATGGGATCCGTAGGAGTGCCCGGAGGCAAAC  
CCGCGTACAGTTTCCACGTGTCGAGCGAGGGCCAGATGCAGCCGGTGCCCTTCCCACC  
GGATGCGCTCAGCGGACAAGGGATACCGCGCCATGCGCGGCAAATTAATACCCTCAGC  
CACGGGGAGGTTCGTGTGCGCTGTACGATCTCGAATCCGACCAAATATGTGTACACCG  
GCGGCAAGGGATGCGTCAAGGTTTGGGATATAGGGCAAGGTGGCACGGGCAGCACCA  
AGTCCGTGTCCCAGCTCGACTGCCTCCAACCTGACAATTACATCAGGTCGGTGAAGCT  
GTTGCCGGACGGCAGAACGCTGATAGTCGGGGGCGAGGCCAGCCGACTTAGTATCTGG  
GATCTGGCGAGTCCAACGCCGAGGATCAAGGCCGAATTAATCTCGGCCGCCCCCGCCT

GTTACGCCCTGGCCATCTCCCCGGACTCGAAGGTTTGCTTCAGCTGCTGCAGCGATGG  
CAGCATCGCCGTCTGGGATCTTCAGAATCAGTCCCTGGTGAGACAGTTCCAAGGCCAC  
ACGGACGGCGCCTCGTGCATCGACATATCGGCGGACGGGTGCGAAATTGTGGACCGGCG  
GATTGGACAACACGGTCCGCTCGTGGGATCTGAGGGAGGGTAGACAGCTGAAACAGC  
ACGACTTCACGTCCCAGATATTCTCGCTCGGCTACTGTCCAACGGGGGAATGGTTGGC  
CGTGGGCATGGAGAACTCGAACGTCGAGGTGTTGCACGCCTCGAACCCGGACAAGTA  
TCAGCTACACCTGCACGAGTCTTGCGTGTTATCGTTGAGATTGCGCTCCTGCGGCAAGT  
GGTTCGTCTCGACCGGCAAGGATAATTTGCTGAACGCGTGGCGCACGCCTTACGGGGC  
CTCGATATTCCAGTCCAAGGAATCGTCATCCGTGCTCAGCTGCGATATATCAGCCGACG  
ACAGGTACATCGTTACCGGTTCAAGGTGACAAGAAAGCGACCGTCTACGAGGTCATGTA  
TTGAAACCGCAACGAAACCGAACCCTACCAACCAGCCAAACGTATTCATCAGACCCC  
GAGCAACTCTCCACAGC

>novel\_circ\_000892

AGGAGCTCGATATCGCCCGGTGATAAATATAGTCGCCCGCGTACACCGCAGGAGACGC  
ATCATTTCCCATCATTTCTCAGAATCACCATGACCATCCCATGCACATCAAGAAGATGAAG  
AAAGAGCAGGACAAGGACATCGGTCATAGTGACGGGGAGAAGAGCGACCAAGGACCT  
CGTTGTGGACGACGCGAGCGAGGGTCCGACGAGTCCCGTGGTGAACGGCACAACGTC  
GCCAAGAGAGAACGGGCTGGACAAGGTGGCGCCGATAGGCGCCGGGGTGCAGACGA  
AGAAGGACGTGCCGCCCCATTCGCCGCGAAGCGGGACGAGCAGCAACGCGAGCACA  
CCCTCGGCCAAGAAGATGGAGGAACGGGAGAAACCGACCACGCCGATCTCGAAACCC  
CTGACCCCGACCTCCGGCTCCGCGATCGGTGGCGGTTTGAAGCCGTCCGGCTCGGCCA  
AGCTGCTCCAGGGACCACCGCCCCCGGCGTGCCAGCGCTTATCCGCCGCACTACGC  
CCCGGGTCCACCCCTCACCATCTGGCACCAGCTGGCCAGCATCCTCACGTGACATG  
ATGGGTTACAACGGCTACGTGGCGCCCAGGGCGCCACCTTCCCTCCAACAGCTCTACG  
ACCCCCACGTGGCCATGAGGGCCCCCATGGGATCCGTAGGAGTGCCCGGAGGCAAAC  
CCGCGTACAGTTTCCACGTGTCGAGCGAGGGCCAGATGCAGCCGGTGCCTTCCCACC  
GGATGCGCTCAGCGGACAAGGGATACCGCGCCATGCGCGGCAAATTAATACCCTCAGC  
CACGGGGAGGTGCTGTGCGCTGTCACGATCTCGAATCCGACCAAATATGTGTACACCG  
GCGGCAAGGGATGCGTCAAGGTTTGGGATATAGGGCAAGGTGGCACGGGCAGCACCA  
AGTCCGTGTCCAGCTCGACTGCCTCCAACCTGACAATTACATCAG

>novel\_circ\_000893

AGGAGCTCGATATCGCCCGGTGATAAATATAGTCGCCCGCGTACACCGCAGGAGACGC  
ATCATTTCCCATCATTTCTCAGAATCACCATGACCATCCCATGCACATCAAGAAGATGAAG  
AAAGAGCAGGACAAGGACATCGGTCATAGTGACGGGGAGAAGAGCGACCAAGGACCT  
CGTTGTGGACGACGCGAGCGAGGGTCCGACGAGTCCCGTGGTGAACGGCACAACGTC  
GCCAAGAGAGAACGGGCTGGACAAGGTGGCGCCGATAGGCGCCGGGGTGCAGACGA  
AGAAGGACGTGCCGCCCCATTCGCCGCGAAGCGGGACGAGCAGCAACGCGAGCACA  
CCCTCGGCCAAGAAGATGGAGGAACGGGAGAAACCGACCACGCCGATCTCGAAACCC  
CTGACCCCGACCTCCGGCTCCGCGATCGGTGGCGGTTTGAAGCCGTCCGGCTCGGCCA  
AGCTGCTCCAGGGACCACCGCCCCCGGCGTGCCAGCGCTTATCCGCCGCACTACGC  
CCCGGGTCCACCCCTCACCATCTGGCACCAGCTGGCCAGCATCCTCACGTGACATG  
ATGGGTTACAACGGCTACGTGGCGCCCAGGGCGCCACCTTCCCTCCAACAGCTCTACG



ACCCCCACGTGGCCATGAGGGCCCCCATGGGATCCGTAGGAGTGCCCGGAGGCAAAC  
C

>novel\_circ\_000894

CAACAGAGACCCGATATATCAAGATTACTGCAACAAATGCATGCTCAACAACTGCCAC  
CGGGGACGGCGCTAGGCGCTCATCCGGGGCTACCCGGACTTCCGGGACTAGGACCAG  
CTGCTGGACTTCCGGTGCCAACCTCCGCCTCCGCCGCGCTTCTTAGCCTTGGCTTGACG  
CCGGGGGCGCCACTGCACCCGGCACAACAGCGGCTCACCCGCTATCGATGTTGAGTA  
AACCGGAATTGCATCGTCAGCCCGACGATTTAAAGAGCAACGGTGGTCTCAGCTCGAC  
CGAGGAGAGACACAGGAGCTCGATATCGCCCGGTGATAAATATAGTCGCCCGCGTACA  
CCGCAGGAGACGCATCATTCCCATCATTCTCAGAATCACCATGACCATCCCATGCACAT  
CAAGAAGATGAAGAAAGAGCAGGACAAGGACATCGGTCATAGTGACGGGGAGAAGA  
GCGACCAGGACCTCGTTGTGGACGACGCGAGCGAGGGTCCGACGAGTCCCGTGGTGA  
ACGGCACAACGTCGCCAAGAGAGAACGGGCTGGACAAGGTGGCGCCGATAGGCGCC  
GGGGTGCAGACGAAGAAGGACGTGCCGCCCCATTGCCGCGAAGCGGGACGAGCAG  
CAACGCGAGCACCCCTCGGCCAAGAAGATGGAGGAACGGGAGAAACCGACCACGC  
CGATCTCGAAACCCCTGACCCCGACCTCCGGCTCCGCGATCGGTGGCGGTTTGAAGCC  
GTCCGGCTCGGCCAAGCTGCTCCAGGGACCACCGCCCCCGGCGTGCCAGCGCTTAT  
CCGCCGCACTACGCCCCGGGTCCACCCCTCACCATCTGGCACCAGCTGGCCAGCATC  
CTCACGTCGACATGATGGGTTACAACGGCTACGTGGCGCCCAGGGCGCCACCTTCCCT  
CCAACAGCTCTACGACCCCCACGTGGCCATGAGGGCCCCCATGGGATCCGTAGGAGTG  
CCCGGAGGCAAACC

>novel\_circ\_000897

GTTTGTTGAAAGGGTCTGTTACGGCTGAGCGACCGCGCACCCCTGCGCCGGCTGCGTAA  
CGTTTACGGGCCATCCGCATGCGGAATGGGAACCGGAGGTGACGGGGGCGGAGGCGG  
GGGCGAACGCCTCGAGGACGGAGAGGTGTCTGTTTTCAGATTGCCGTCGGAACGGGATCG  
CGAAAGGGACGAGAAGTCCCTCAGCATAATGAGCCCTTTCGACGAGCAGGAGGAATG  
GGCCAAGATTTTCAGAGATCATGGCGTCGATCGGCACCGGCCTCGTCAGGGAGTCGGTC  
TTCGTCACAGAATTGGAGAAAGAGTTCCAGACGAGACTAGGTTTTCAGCTCGGACACT  
AGTAGCAGTCCTATCGTCTCCACTTCCGTTGGCCAATGGCTGTCGACGCTGGGCCTGGC  
CGATTACGAGACCCTGTTTCATCAACTACGGATTCGACGACCTGGATTTTCATAAACGGGG  
TTTTGGACGAGACCGATCTGAAGGATATGGAGATCACTAGCGATCAAGAGCGGGCGGT  
GATAATGGACGCGGTTCGTTTGTGTAACAAACGGTTGGACAAACGGTCCAACGTTCAA  
TCGGTGGACGAGTGGTTGAAAAGTATCCATTTGGAAAATTACGCGGAAACGTTCAAAA  
AGCACTTGTACACGGATATGGAGCGCGTGAGGTGCGTGTGGGAGGTGGAATTGGCGA  
CCGTGCTCGAGATACAGAAGCCGGCGCACCGTAAGAGGATCCTCGCGTCCGTCAGTGG  
ATCGAGCGCGCGTGCGCAGAATCGTAACTGCGCCGGGCCCAACTTGGAGGATCTCAAT  
AAGGATTTGAACACCTTG

>novel\_circ\_000898

GGCACAGATCTTCCTCCGGCGTGGAGAGCGATGCCGACAGCGAGAACTTGCCACCGA  
TTCCGGTCCAAGGGAACGACTCATTGGGCAGCCCTTACGAGAACGTTTCGCCAGGGGA  
TGATCTCTCCCCGGCGGAAGGGACATCGCCCACTCAATGGCAATTCTATCACAAGCCTC

GGGACGATGATCGCCGTGTTTCCGGCACTTCCGTTATGTCTTTGTGAGTATCGTGTCGC  
CCCTTCCTCCTTTTAAACACCGCCGTTGCTTTCGATGTACATTCCTCCTTTCCCCTCTCTTT  
TTTTTGCCGCCATACATCTCGTAATAATAAAATGCCGTTATTGCGCTCTGTCTGCGATTGT  
CAATCTGCAAGGAATAAAATAATTTCGATGTAAAAAAGCTTTACTTAAAATTTAAAAATTTT  
TTAGATCGTAAATCTCTTTCTCTCTCTCTCCTTTTGATAAAAAAGTGGTCCCGTTCTTAA  
TTCGTTTAAATCACAGACGAAATAAGAAATTAAAAACAATCGAGACGTATTTAAATCACG  
ACGATCGAAATGAACAGAGATCCGGAGAAAAAGTATCTCCCTACGTAAAAAGCAAATG  
CAACAATGCAACAATAACGGTGTTCATCGATGCAAAAAACGGCCAGGTCTGGTTTCG  
ATCATCCTTCCAACAAGAACGAACGCATCGCTACACGCCATTTCGCATTTTGCATTTCCG  
TGTAACGATTGCGTGAACCTTCGAGAAGAGGGGGGGCGAAAAAAAACACACGAAGA  
GAAAAGAAAGAGAACGGAAAAAAAACGAGAAGAAAAAAATAAAACAAGAAGGAAA  
AAAAAAGAAACAATTGCACCGAGCTGTTACTTGTCTCTCCCTCTCTCTCTCCCTATCC  
CTCCCCCTGCATTTGTGCTCATCCGGCGTCATCTTGGGGCGGAGTGAGAGAAAAGAAT  
ATCGCGTCGGTGCATCGGATAAGAGCGGAGTCAGAGTGGAGTAGTAGAGATCGGTATA  
ATATTTTCTAGAAAAGAGCGGATACGCGGGGCGCATAACCGTGGCGGCTTTAATATAGG  
AGATGTCGGGTAAACAAAAGCATAGACGTTGGACGTGGGGCACACGGAGTGAACGAA  
CGTGGCTCGGATGATGGTTAGTCGTCGTCGAGTTGGTACCGTTTTAGCAGCACCGA  
TGCTCTGCACCGCACAGCCACAGCCGAAGTTCTGGGTGGGAGAG

>novel\_circ\_000899

AGCCGTGGTGGAGGTGTTGCTGGCGGGCGGGCGTCGACGTGAACACCAGGACGTCCGC  
GGGGACCGCGATGCACGAGGCGGCGCTCTGCGGGAAGATGGAGGTGGTGCGGGCACT  
CCTGGACAGAGGGGTTCGACCTGGGCATCCGGGACTCGCGACAGAACACGGTGCTCGA  
TCTTCTGGGACAGTTCCCGCCGCACGTCACTCAGGACATCACCGCGGTTATAAAAAGG  
CACAGATCTTCCTCCGGCGTGGAGAGCGATGCCGACAGCGAGAACTTGCCACCGATT  
CGGTCCAAGGGAACGACTCATTGGGCAGCCCTTACGAGAACGTTTCGCCAGGGGATG  
ATCTCTCCCCGGCGGAAGGGACATCGCCCACTCAATGGCAATTCTATCACAAAGCCTCG  
GGACGATGATCGCCGTGTTTCCGGCACTTCCGTTATGTCTTT

>novel\_circ\_000900

GGGAGATCACAAGTAATGTATTACGCGTTGCACGTGAAGCACGTCAACGAACTCTTGG  
TCCATTTAGTCCATCGTTTAATGTACAAGAAATATTGTTAGAAAGTTTACAAAAGTTTCT  
TCTAATGATGCTCATATTCGTGTGAGTGGTAAACTTCATGTTTCCTTAACAAGAGTATA  
CGATGGAAAAAATGTAATTGTTTTACAATTCTCATCTAGAGAAGACTTATTACAAGCATT  
ATTGGCCAGTGCATTTGTTCCCATTTTTTCTGGTCTTTTACCACCAAGATTTTCATGGTATT  
AGATACATGGATGGTGGTTTTAGTGATAATCTTCCAACACTTGATGAAAATACTATTACT  
ATTAGTCCTTTTTGTGGAGAAAGTGATATTTGCCCTAGAGATGTTTCTTCTCAACTTTTC  
CATGTCAATCTTGCAAATACAAGTATAGAAGTTTCAAGACAAAATATATATAGGTTTGCA  
AGAATACTTTTTCCACCAAATACAGAGATACTTTCAAATATGTGCAAACAGGGATTGA  
TGATGCATTAAGATTTCTTCATCGAAATAATTTACTTAATTGTAAGTTCGATGTTTAGCAGTA  
CAATCCACATTTGTTGTTTCAGAACTCTTGATGATAATATGGATTATGATCCTGAATGTT  
TAGAATGTAAAATGCATAGACAGGAAGCATTAGTATCTAATTTACCTGAAACAGTTATG  
ACCATATTTCAAGATGCAATTGATTCAGCTAATAAAGGTTTAATTAATTGGTTATTTAAAC  
ATCGAAGTGTAAGAACTTTTGTCACTTAGTTTACCATGTACATTGCCAGCAGATGTTG

TGTATGCAACTTTTACAAA

>novel\_circ\_000901

GCATTATTGGCCAGTGCATTTGTTCCCATTTTTTCTGGTCTTTTACCACCAAGATTTTCAT  
GGTATTAGATACATGGATGGTGGTTTTAGTGATAATCTTCCAACACTTGATGAAAATACT  
ATTACTATTAGTCCTTTTTGTGGAGAAAGTGATATTTGCCCTAGAGATGTTTCTTCTCAA  
CTTTTCCATGTCAATCTTGCAAATACAAGTATAGAAGTTTCAAGACAAAATATATATAGG  
TTTGCAAGAATACTTTTTCCACCAAATACAGAGATACTTTCAAATATGTGCAAACAGGG  
ATTTGATGATGCATTAAGATTTCTTCATCGAAATAATTTACTTAATTGTACTCGATGTTTA  
GCAGTACAATCCACATTTGTTGTTTCAGAAACTCTTGATGATAATATGGATTATGATCCT  
GAATGTTTAGAATGTAAAATGCATAGACAG

>novel\_circ\_000902

ATTGAGGATGTCCTCAAAGAGGAAGTCACCACCAACGAAGCTATCGGAGGGCGGGGG  
CGGCACGGGTACAGTGGCAGGCGCAAACGAGGAGGAGGAGGACACGACCTCGTCGG  
TGACCGGTGGTCCCGGTGGCGAGGTAGCCGTCGGTGAAGAGGGTCCCACCACCCCCG  
TCGACATCGAGGACTGTTACCCCCACCAGAGGGGAGGTGACTGCGAGTCGTCCGGCT  
GCTCGTCGCCGGCGACAACCAGCGAGCCCGATCTCAGGGACTCGCCCTCGCCATCGTC  
GAATTCCTTGCGGACCAGCAAGCGGCAGAGGATCGTGTTGACGGGGCAGGAGGCACT  
TGCCTACCATTATCCCCCCCCACCACCACCACCACCATCATCACCATCACCACCACCATC  
ACCACACGAACACATCCTCGTCGTCGGGCGGTGTCGTGGAACCCGCCAGCTCCTCCGA  
GTGCGGCTCGCCCCCACCACCTTAACCGTCGACCCCTATTACCCACCCATCCTCATC  
ACAACAACAACAACACCGTCACCCAGAATAATAACAACAACAACAACAACAACA  
ACGGCGGGAACGCCACCACAGCGACTACCAAGAGATCCATGGACGACGTGCTGAAGA  
GGTTAACCTTCAAGATGAACAGCGAGTCGTTGTCGCTGCAGGACGACACGAGTAATAA  
CAGGCGGAACAGCCCGCCGCCACCTCCACGCCGACCGGGCACAACGCGCATTG

>novel\_circ\_000903

TCGTATCCTGCGCACATGACCGTCGACTCGCAGAAGCAAATCGAGATGCAGCGGCTGC  
AAACGGAGCACTTGAAGCGGCAGCAAGAGCACATCATGCAGCACAACATCCAGGAGC  
TACAGGCTCAGATGACAAAGAACCAGCTGAGCATGTCGGGGCCGCAATCCTTGATGTT  
CCTACCGTTTCTCGAACAGCTCAGAGGGTTGCCGGTGCAATCGCCTATGCCGCCGCCG  
CCTGTTACGTCGACGTCAACCACCACCAACAAACATATCAATTCGATCGCTAACATGAT  
CAGCAGCCACAGGGAAGGGCCAAGCTGGGCGACGGCGCATCTCGCGCAGATGACCAC  
GCAGATGGAGAAGGAAGCGTCGCCGACGCCGATCTCTTCCGCGGTGGCGCCGACCGC  
TGCCCCCTTGACGGACCTCGACGCGCCCCTCAACCTCACCAAGCCCAAGTCCTCGTCG  
TCCGGGGCCACGGCGTCCTCCTCGTCGCCCGGAAGCGACTCCCCTCGACCGGGGCC  
GGAAGCAGCGGCCAGCAGGAGCAACCGCTCGCGGCCACCGCGCCCAAGCTCTTCCCA  
CCCGGGCTACCGATGCCTCGAAATTATCTCACCACCCTTCCCTACGCGGGCCTCCCGCC  
TCACCTCAGCTCCATCTCCTCCCCGATGGGCAAGGTAATGGCCAAAGACGAGGCGGCT  
GGACCTGGGGGTGCGGTGGCGGCAGCCGCGGTGCGCGCCATGGAGAAGCACATCGCG  
ATGCACAGTATTTACGCGATACCGCCGAGCGCTGGCGCGATGCCCCCGTCGCCGCAGA  
CCCAACGACCCGGGGGTCTCAAGCACTCCAGTTCTCGGGAAGAGGCTGCACAGGAGG  
AACAGGACTACCTGTGACACCTCACA

>novel\_circ\_000904

AAAATTTAGCGCCATCGGAATTAATAAAATTGAGAAACAAGCAGAGGAAGCAACGTA  
GAAAGGCTGAATTGGAAAGACAACAGGCTGCTCAAGCTCAAGAAAAGAGAGAACAG  
CACAATAAATCACGGCAACAGACCGATCCTGATTTAGAACAACCTACGCTAGATGAAC  
TTATACCGGAGAACTGGAGAGGATCGAGGACCCGTTAGAGCAGGCAATCAAATTTTT  
ACAACCATTACAAGATTTGGCATCGAATAGAATAGAGACGCATCTTATGGCATTGAAA  
TATACATTCGTAAAGGTCGTACGTTGTTAATGTTAAGGTCGATAAAACGTGCACACGGT  
TTAGATCCTAATAATCCAGATCTTCATACATGTTTGGTACGTTTCATGTTATACATTAACC  
GTTACCGTTGGAAGGACCCGTAGGCGAAGTAGTGAAACGGCAAACATCGGGAATTTA  
TTCAGCTTCAACAGCCACCCAATTGAATGCTGAATTCCTAAAAAGAATCGAAACTCA  
CTGCCGCATCTACTTCAGGGCGCGAGGATGTTATATGTCCTGGATCCCTCTGCTCAAAC  
AAAAGCTCTCTCACTTATCACAAACATTGATGGTCTCGAAAGTGTGACACTCCAGAATT  
GTACAAAAGTATTGGAGTCATTATGCAACGGCGACTTTGGTCATTGCGATTCAACCATC  
GCTGATTATATGGTGAAATGTCATAAATACTTCCCATACGCGACCGCTTTTCGACCGCCA  
GAAACGAAAGTGACGGTAACGATCAAACATCAAGAGAAAGAGAATTCCATCAAGAAC  
TGATCCAGGCACGCGCTGTCCAGCGTTACTGAATCGTTATCGTAGTTAGACGACGAGG  
CAAGCGAG

>novel\_circ\_000905

GATTTTGCTTTTCAGGCTCGCGTAATCGACAGACGTGCCGGATCGCGCGGCGTCGCCG  
GGGCTCTTCAGTGGTAGTCGAGAGGAATCTGCGGCGCAAAAAGAGAAAGAGGGAAA  
AAAAAGGGAAAAAAGGAGGGAGGGGGGGCGAACACATCGCTAAGGAAGGCTAGGAA  
GGAGATAAAGGGAGAATCTGGTGGAGAGGATCGTCGAGGAGAGGAAGTGGGGCGCC  
GGTGCTGGCCACCGGGACCAATCATCCTTCCCTTCCTCAGGATGTCGTACGCCAATCGA  
TTCCCGTCTTCGCAGCACACCCGTTATCGAAGCAGCTGGGGACCCCTCTCGGTACCG  
TGTTCAATCGGGCCGATGTGCCCAGGCCCTCGCCGGAAGAGGAAGAGTACGCCGAGT  
TCTATCACGAGCGTCTCCACTCGGCACAGAGCAGACAGTTGCTGCCGTTGCAGGAGGA  
CCTGGCCGATTGGATCAATAAACGTTGA

>novel\_circ\_000906

GCTCGCGTAATCGACAGACGTGCCGGATCGCGCGGCGTCGCCGGGGCTCTTCAGTGGT  
AGTCGAGAGGAATCTGCGGCGCAAAAAGAGAAAGAGGGAAAAAAGGGAAAAA  
GGAGGGAGGGGGGGCGAACACATCGCTAAGGAAGGCTAGGAAGGAGATAAAGGGAG  
AATCTGGTGGAGAGGATCGTCGAGGAGAGGAAGTGGGGCGCCGGTGCTGGCCACCGG  
GACCAATCATCCTTCCCTTCCTCAGGATGTCGTACGCCAATCGATTCCCGTCTTCGCAG  
CACACCCGTTATCGAAGCAGCTGGGGACCCCTCCTCGGTCACCGTGTTCAATCGGGCCG  
ATGTGCCAGGCCCTCGCCGGAAGAGGAAGAGTACGCCGAGTTCTATCACGAGCGTCT  
CCACTCGGCACAGAGCAGACAGTTGCTGCCGTTGCAGGAGGACCTGGCCGATTGGAT  
CAATAAACGTTGA

>novel\_circ\_000908

GCCGAAATATGGAGCGTGTTTCATCGCCATTTTGAGGAAGAGCGTGCGGAATCTGCAAG  
CGTGACAGACGTAAGCCTCATCGAACACGTGCTGCTTCGATTGTCCCGCGCGGAAAC

TGTCGTCGCAGATCTATTAATCGACATGCTTGGAGTGTTGGCCAGCTACAGCATAACGG  
TGAAGGAGCTGAAACTTTTATTCGGCGCTATGAAAGCTGTGAAAGGGAAATGGCCACG  
ACACTCGGCGAAACTGTAAACGTGCTCCGTCAGATGCCGCAACGGAATGGACCCGA  
CGTGTTTTTTAGTTTTCCCCGGTAGAAAGGGATCGGCAATCGTTCTGCCGCCTCTCGCAA  
AATGGCCACACGAGAATGGTTTCACGTTTACCACATGGTTCCGCCTGGACCCCATCAA  
CTCCGTAAATATCGAACGAGAAAAGCCGTACCTCTACTG

>novel\_circ\_000910

TTTTAAACTAGCAAGGGAGTGGGATACTCCGCGCATTTTCGTAGGGAACTGCTTGGTC  
CTCACCTCTATGAAAGTGAAGGGCAAGGGCTTCCAGCATTGTGTCAAATATGAATTTCA  
ACCACGAAAGTGGTATATGATCGCCGTAGTGACATATATAATAGGTGGACGAAGAGCG  
AAATTAAATGTTTGGTCAACGGTCAATTGGCTTCGAGTACTGAAATGGCGTGGTTCGTT  
TCAACAAACGATCCGTTTGACAAATGTTACATCGGGGCTACACCGGAACTGGATGAAG  
AGCGCGTGTTTTGCGGACAAATGAGCGCTATTTATCTGTTTCAGCGAAGCTCTGACTACG  
CATCAGATATGCGCTATGCATAGACTGGGGCCTGGATATAAGAGTCAGTTTCGTTTTGAC  
AACGAGTGTTACCTGAATCTGCCTGACAATCACAAAAGGGTGAGTGATGAGCCGGAG  
CTCACGAGCATGGTGGACCAAAGTATGCAAACGTGTGCTTTACGATGGAAAGCTATCGA  
ATGCGATTGTGTTTCATGTACAACCCGGTAGCAACGGATTCTCAACTTTGCTTGCAAAGC  
GCACCAAAGGAAACGTCTCCTATTTTGTACATACACCACACGCCCTTATGCTACAGGA  
TGTTAAAGCTGTCATCACGCATTCCATTCATAGCACGTAAATTCCATTGGTGGCATTCA  
AGTGTTGTTCCCTTTGTTCTCGCAACTAGATATGCCTTACGATTGTATAGCTCCCAACGA  
TGTTAAACGAGATCCAACGTTATGCTCGAAACTGTTGGGGTTTATTTGCGATCTTGTCG  
AGAGTTCGCAAACGGTGCAGCAACACATGGTGCAAACCGTGGGTTTTTGGTGATCA  
GTTACATGCTGCAGAGAGCGAGCAGAGACCATCTTACGACGGAAGTCCTCGCGTCCTT  
TTTGAGCTGACGAAACATCTGGTCACTTGTCTTAGCGCGAACAGCGACTTGTTATTG  
AAACAG

>novel\_circ\_000911

TTTTAAACTAGCAAGGGAGTGGGATACTCCGCGCATTTTCGTAGGGAACTGCTTGGTC  
CTCACCTCTATGAAAGTGAAGGGCAAGGGCTTCCAGCATTGTGTCAAATATGAATTTCA  
ACCACGAAAGTGGTATATGATCGCCGTAGTGACATATATAATAGGTGGACGAAGAGCG  
AAATTAAATGTTTGGTCAACGGTCAATTGGCTTCGAGTACTGAAATGGCGTGGTTCGTT  
TCAACAAACGATCCGTTTGACAAATGTTACATCGGGGCTACACCGGAACTGGATGAAG  
AGCGCGTGTTTTGCGGACAAATGAGCGCTATTTATCTGTTTCAGCGAAGCTCTGACTACG  
CATCAGATATGCGCTATGCATAGACTGGGGCCTGGATATAAGAGTCAGTTTCGTTTTGAC  
AACGAGTGTTACCTGAATCTGCCTGACAATCACAAAAGGGTGAGTGATGAGCCGGAG  
CTCACGAGCATGGTGGACCAAAGTATGCAAACGTGTGCTTTACGATGGAAAGCTATCGA  
ATGCGATTGTGTTTCATGTACAACCCGGTAGCAACGGATTCTCAACTTTGCTTGCAAAGC  
GCACCAAAGGAAACGTCTCCTATTTTGTACATACACCACACGCCCTTATGCTACAGGA  
TGTTAAAGCTGTCATCACGCATTCCATTCATAGCACGTAAATTCCATTGGTGGCATTCA  
AGTGTTGTTCCCTTTGTTCTCGCAACTAGATATGCCTTACGATTGTATAGCTCCCAACGA  
TGTTAAACGAGATCCAACGTTATGCTCGAAACTGTTGGGGTTTATTTGCGATCTTGTCG  
AGAGTTCGCAAACGGTGCAGCAACACATGGTGCAAACCGTGGGTTTTTGGTGATCA  
GTTACATGCTGCAGAGAGCGAGCAGAGACCATCTTACGACGGAAGTCCTCGCGTCCTT

TTTGGAGCTGACGAAACATCTGGTCACTTGTCTTAGCGCGAACAGCGACTTGTTATTG  
AAACAGTTGTTTTACTTTTCATTCCTAACATGGCAGCTATTGGACCACGTCCTTTTTAAT  
CCCGCTCTGTGGATATATACGCCGGCTCCGGTGCAAACCCGGCTTTATTCGTACTTGGC  
CACAGAGTTCCTCAGCGACACGCAAATATATTCTAACGTGAGGAGAGTGTTCGACGGTA  
TTGCAAACGGTGCACACGCTTAAGTACTATTACTGGGTCGCCAATCCTCGGGCAAAGA  
GTGGAATCACTCCCAAAGGACTTGATGGACCGAGGCCACAGCAAAAGGATATTTTGAC  
AATACGTTCTTACATTTTGTATTCTCAAGCAATTGATCATGATAGGGAACGGGGTGAA  
GGACGACGAGTTGCAGAGTATATTGAATTATCTGACGACAATACACGAGGATGAAAATT  
TACACGACGTTTTGCAAATGCTTATATCTTTAATGTCGGAACATCCCTCGTCCATGGTGC  
CTGCTTTCGACGCGAAACAAGGCGTCAGGACGATTTTAAAGTTGTTAGCAGCGGAGAG  
CCAATTAATACGTTTACAAGCCTTGAAATTGTTAGGATTCTTTTTTAAGCCGCAGTACACA  
CAAAAGGAAATATGACGTAATGAGCCCCACAATCTCTACACGTTATTGGCCGAAAGAT  
TATTGTTGAACGAGGAAACATTGTCATTACCTACCTACAACGTTTTATACGAGATCATGA  
CGGAGCACATCAGCCAACAGATCCTCTACGCGAGGCATCCTGAACCAGAATCCCATTA  
TCGTTTAGAAAATCCAATGATCCTCAAGGTAGTGGCGACTCTGATTGACAATCGAAAC  
AAACGGAACAATTGCTCGAAGTGAAGAAGCTGTTCTCTCGGATATGACATTGTTGTG  
CAACAACAATCGAGAGAATCGTCGAACTGTTCTACAGATGTCTGTATGGCAGGAGTGG  
CTTATAGCCATGGCGTACATTCATCCGAAGAACACGGAAGAGCAAAAAATCTCGGACA  
TGGTGTACTCGTTGTTTCGCATGCTTCTCCATCATGCTATCAAACACGAGTACGGTGGAT  
GGCGCGTATGGGTGGACACTTTGGCCATCGTGCCTCCAAGGTATCCTACGAGGAATTT  
AAGCTTCAATTTGCTCAGATGTACGAGCATTACGAGAGGCAAAGATCGGATAACATCA  
CGGATCCTGAGCTGAGACAGCAAAGGCCGATCAGCACTATCTCTGGCTGGGATCAACA  
GCATTCGGGGAATAATGGTTACAACAAACCGTCACCCTGGAGCAATCAACAGACTCAC  
GATGTGCAACACGTGGAGAGGAATTACAAGGAGTTCGACACAACGGAGGGTAATGAC  
AGGCTGGAGGAGTCGTGCAGTTGCGACTTGAATTCGATAGACAACACGGAGAGCGAC  
GGGAGCCCTGCGATCGTCAAGTCTCGTAGCGAAACGTTGGACACGGCGCAATCGAGC  
GAGGCGATATCCCTGGACTCGAGGCTGAGCGACAAGCCAGAGACGCCGACTACGGCG  
CGAGAAATCCACACGGATACGCCTACGATCCTCGAGGAAGGGAACAGCGAGGCTGCC  
TCCATTCCGACCACCCAAGAAACCAGCGAGGCGATATCGATAGAGAGCTCGAGCGATT  
TCTACAGCGAGGTACACAAGATCGAGGGTTCCAGCCCGGATTCCATGGTGGTGCAAGA  
AGTTCTGAAGAAAGACGACGATCCTTCCGAGGCGAAATCGCAGGATGAAGCTGTCTCT  
CCGTCCGAAAAGAAAGAGGAGAGCGTGTCCAGGAAGACGTGGAGCAGCCGAAGGA  
AAACCGGACGAGTGTGACGTTTCCACGTGCAAAAGGGCGACGAAACCGAGGGTG  
AAACCGAGGAAATGGATGGTCAAACGGAAGTGGAGGAGGCTGGAGGAGAGGTGAAA  
GTTGAAGCTGGGATCGTCGAAGCCTGCGTCGAAGCTGGAACCGAGGTGGAACCGAG  
GGAGAGACTGAGGTCGAGGCTCCATCGAGGTTGGAAGAGGCGAGGAACGAAGAGATA  
TCGAGTTGTTTCGATGGACAACGTTGCTTCCAACGAGGAGACTTCCCCTGATATTGTTCT  
CGATAAGGGGGAAGAGGGAAGGGAGAAAAGTGCGGAGGAGGACGTTGCCGGCTCGG  
AGCAGCAAGCCGATACGGAGCACGCGCCGTCGTCCGTTCCCTCGAGCGAGACGCCAG  
AGCCGTTGATCATCAAGGATATCGAGAAGCTGCAATTGGAGAACGATCGCGAGGTGAT  
CGACAGCGATACCTCGGAGGCTTACTTGACACCGACCGAGAATCAAGATAATCTGGCC  
GACATGAAGCCGAAGGAAGCGATGGAGAAGATGGAGGACAGCGAGAAGGGGGTGGA  
GAAGGGTGTCGACGTTGAGAAGAGCGAGAACGACGACGGGGAGGCTGGGAATAATTC  
CAATTGCTCAACTAGCGTAATAGAGAGTAACGAAGCGGGCGACGAGGAGGAGAAGAA

GGAGGACGTAGACGTAGACGTAGAGGGGAAAGTGGATACATTAGTAGTGA  
GTTGTTAAGTAGTGAGAAATGCGCCGTGGACTCTGTGAAAGAGGAGAAAAGTGCCGT  
TGTTAACGTTGATAACGGGGTGAAGGTTACTTACGACAAACAACATTCAAGGGAGCCG  
TCCACTATTTCTACTAACGTAAAGTGATAATCAGTCAGACATTCCAGTGAGAACCGAGAA  
CGAGGTAGAAGTAACAGATAGTGTGTTGTAGTAATAGCGATATTCAAAGTTCTGTAGATA  
ATGTGACGCAAGTGCCAAATCCTAAACAGCAAATTCACAATATCTACGGTCTGTGAT  
GCAAATAAAAATATGCCCCGACGGTGTGCCTCAAATCGTTAGTTCTACAGTGGTTGCGAG  
GGATAATTCTTTGTTGATGAATGAGTTAACTTCGGATCACGTAGATGCTCATCGCAGATC  
CAGCTTGCCGGCTGTGTCTCCGAGACGACCACCGACGATAATAACGTAAACGAACCT  
CCCTCCTTACCTGTCCCCTTGCGGAAAACATCGTCACCTCAGAAACGACCAAGGAGTG  
CCTCAACGTCCACGCAAGTGGATCCGAATCATTTTCG

>novel\_circ\_000913

GTGCTCAAGTACTGCGACCATCTGCACGGAAAATGGTACTTCTCGGAGGTGCGCGCGA  
TATTCTCGCGGCGATATCTGCTCCAAAACGTGCGCATCGAGATATTCCTGGCCAGCCGA  
ACCTCGATCCTGTTGCGGTTCCCGGACCAGGCGACGGTGAAAAAGGTGATCAAGGCG  
CTACCGCGGGTCGGCGTTGGCATCAAATACGGGATTCCGCAGACTAG

>novel\_circ\_000914

GTGCTCAAGTACTGCGACCATCTGCACGGAAAATGGTACTTCTCGGAGGTGCGCGCGA  
TATTCTCGCGGCGATATCTGCTCCAAAACGTGCGCATCGAGATATTCCTGGCCAGCCGA  
ACCTCGATCCTGTTGCGGTTCCCGGACCAGGCGACGGTGAAAAAGGTGATCAAGGCG  
CTACCGCGGGTCGGCGTTGGCATCAAATACGGGATTCCGCAGACTAGGAGAGCATCGA  
TGATGTCGCCCAGACAATTAATGAGGAGCTCCAATATGACGCAGAAGTGGCAGAGAAG  
AGAAATATCAAATTCGAGTATCTCATGTTCTTGAATACCATTGCTG

>novel\_circ\_000916

TGCGTGGAACACCACATGTAATATCTGCTACAAGACATTTGCGTGCAACTCCGCGCTG  
GAGATCCATTACCGGAGCCATACGAAGGAACGACCTTTCAAATGCACCATATGCGACA  
GAGGATTTTCGACCAAGAACGATGGTTCCGGGCAGCAAGCATGCGTCTGTGCGTCTCA  
ACCGTTGCCCCGCTAACAGTTCGATCACTTACCCGATCCTCAATTCGGATCACCGTGCG  
CCAGTAGTCGAGAAAAAGCGAAACGCAGGCGGCGGGCGGCGACCTGAGGATCGGAAG  
AACCGGGGGCGGAAAGGAGCCGGAGGGGGGCGGGGGGCTTACGCCTGTCTATCCTGCC  
ATCCGCCTACCCCCGCTGATGTCGCCCCGCCCTCGGACTTCTACCCTCGGCGCACAGCCT  
CCTGGGAAACATGAAGCAGCATATGCTGACCCACAAGATCCGGGACATGCCGCCCCAT  
CTGTTCAAGCATTGAAGCAACAACAGCAGCAGCAGCAGCAGCAGCAACAACA  
ACAACAACAGCAACACCAGCAACAGTCTCAGGAGCACGAGACCTCGAGAAGTCCTAT  
GTGCGCCGAGGACTCGAGCTTACCGCCGCCTCCGCCGCCTCCGCCGCCTCCTCCCCCG  
ATGCCCCCACCTCGATAGAGCAGAGCATCGCCGTGAAGAGATCTCCGCCCGAGGGAG  
AGCTGCCAGCGCCAAAGAGACCAGCCAGCGTGCCGAGCAAACACTTGTGCCAGATTT  
GCAATAAGAATTTCTCCTCATCTTCGGCGCTCCAGATCCATATGAGAACTCACACGGGC  
GACAAACCGTTCCGATGCACCGTCTGCCAGAAGGCCTTCACCACCAAGGGCAATCTCA  
AG

>novel\_circ\_000917

GTCCGGCCACTTGGACGGGAAGGACGGGAAGGACGAGAAGCCACGTAGCCACGGTG  
GTTCCCTCGCCCGATCGGGGAAACGACGGATCTCACTCGCGGAAATCGGTGACGATGA  
GCTAGCGACACGACGATGAGGAGGATGAAGCAGCGAGCGCTGCTCGCCTGGCCATGG  
TTGTGGCTGTGGCTGCTCGCGGCCACACCGGGTTCCCCGTCTTCCGACGCTTCCCCGT  
CGACCACGCTCTCGTCATCGTCGTCGTCATCGTCGTCGTCGGCGGCGGTGGCGAGCAC  
AGTGACGAGGTCAGTCTCGCCCACCATCATCCCCACCTCCACCTCCTCCTCGTACGAG  
GGGACGAACAACCACGACGACCAACGACCAACGTATCCCCAACAACCTGACAACGAG  
TTCCGTTTACCCTTCCGCTCTACAACGTGTGATACCCGAGAACTCGATCGGCAAGAC  
GTACGTGGTCCCGTCCGTGGACGAGAGGATGGGTATAAAGCTCCCGTCACCGGACGCC  
AACCTCGACATCCGTTTCCGCATAATGAGCGGTGACCGCGACCGATTCTTCAAGGCCG  
AGGAGCGGACAGTCGGTGATTTTTGCTTCCTATTGATTCGGACTCGCACGGGGAACGT  
GGACGTGTTGAACAGGGAGAGGAAGGATCATTACGTGCTCGAGGTGCGCGCCACATT  
GAACAAGAACGACGGGAGAAATCTGGTTACGATACTCGAGGCGGACACCACCGTGGT  
TGTCACGATCTTGGACACGAACGACCTGAACCCCCTCTTCTACCCGACCAAGTACGAG  
GCCACCGTCGCGGAGGACACGCCTATGCATCGGAGCATACTCAGGGTAATCGCCGAGG  
ACGCAGATCTCGGCAGGAACGGGGAGATTTATTACAGCTTCGCCGAGGAAACCGATCA  
GTTTCGCCGTTACCCGGTCAGCGGGATAATAACGCTCACCAGGCCGCTCAGATACACG  
GAGCGAGCGATCCACGAACTCGTGGTGCTCGCAAAGGACCGGGGTGCGTTGTTCCGG  
GGAAGCAGCAGGGCCAGCACGGCGAAGGTGACGATCAAGGTGCGCCAGGTGAACCT  
CCACTCGCCCGAGATCTACGTGCACCACCTGCCCGACATCGTGGAGCACTCGAACGCG  
GACATCTACGCGATCGTGCGGGTGATCGACAACGACGAGGGGGTACACGGGCAGATC  
GCGAGCCTGGACATCGTGGGCGGGGACCCGGCCGGCCACTTCAGAGTTCGTCCAGCC  
GGCGGGCCGCACTCGGGCGAGTACAACATCGAGGTGTTGCACCTGTTGGACAGGGAG  
ACGGCGGTGCAGGGTTACAACTTGACGCTGCGCGCGACGGATCGGGGCGTCCCGCAA  
CGGTTACAGTACAAATTTCGTGCCCGTCCATCTGGCCGACCTGAACGACAACGCCCCGG  
TGTTACGCCGGGAGATATACGAGGTGAGGGTGGCCGAGACGGCGCCCGTCAACACGC  
CGGTGATCCAGCTGAAGGTGACGGACGCGGACGAGGGGAGGAACGCGTTGGTGTTC  
TGGAGATCGTGGGCGGGAACGAGGGGGGCGAGTTCTACGTGAACGCGGAGACGGGG  
ATGTTGTACACGGCCGTGAGCCTGGACGCCGAGAAGAAAGCGTTCTACACGTTGACG  
GTGTCGGCGGTGATCAAGGGAACGCGGGGACCAGGAAGCAATCGTCGGCCAAGGTG  
AAGATAAACGTGGTGGACACGAACGACAACGATCCGACGTTTCGAGCAATCGGAGATG  
GAGGTGTGGATCGACGAGAACGAGCCGGCCGGCACGTCGGTCGTCAAGATAACCGCC  
AAGGATCGTGACTCGGGCGAGAACGCGTACATCTCGTACAGCATCGACAACATCCAGA  
AGGTGCCGTTTCGAGATCGACCACTTCTCGGGTATAGTGAAGACGAAACAGGTGCTCGA  
CTACGAGACCATGAAGCGGGAGTACTTGCTGCACGTGCGGGTGAGCGATTGGGGGAT  
GCCGTTACGGCGGCAGGCCGAGATGCGGCTGCACGTGAAGGTGCGCGACGTGAACGA  
CAACAGGCCCCAGTTCGAGAGGATCGATTGCTCGGGCCACGTGCCGAGGTACGTGTG  
ATCGGCTCCGAGATCATCACCGTCTCGGCCATCGACTTCGACGCGGGCAACATCATCA  
GTTACCGCATCGTCTCCGGGAACGAGGACGGCTGCTTCGCCCTCGACTCGGCGAGCGG  
CGTGCTGTCCGTGCGCTGCGACCTGTCCGACGTCAAGGTGGCCGAGCGGGTGGTCAA  
CGTACCGCGACGGACGGCTCGCATTTGCGGGACGTGAACCCCGTCCAGATGCACCTG  
GTGAACGCGAAGCGGAACCTTGGGCTCGCAGGGGAGGATACTGTCGGATCAGAGCGGG  
GCGTTCGAGTGCCGGGACACGGGCGTCGCCCGCCGTTTGACCGAGGCAATCGCTGCC



GCCGAGAGGAACAACATGCCCTCGAAGGACGACGAGTACGCGCTGACGCCCAGCCGA  
TACGGCGAGAACGTGCACGCCCCCGAGTTCGTCTGACTTCCCCAGCGAGATAAAGGCG  
AACGAGTCGGTGGGGATAGGCACGACCCTGGTCAGGATCCGCGCCAGGGACAAGGAC  
CTGGACTACAACGGGAACTGGTGTCTGCGTCTCGGCCGGGGACCGGGACTCCGTG  
TTCAAGATCGACCCGGACACGGGCGATCTGAACGTGATCGGTCACCTGGACAGGGAG  
CGGGAGAGCGAGTACTTCCTCAACATCAGCGTGTACGACTTGGGCAAGCCGCAGAAG  
TCTGCCTCGAGGATGCTCCCCGTCACGATCCTCGACGTGAACGACAACGCGCCCAGGT  
TCGACAAGTCTTTGGCGAGCTTTTCGCGTCTCCGAGACGGCGTTGAACGGGACGAACG  
TGTGGCGGGCGAACGCGACCGACGCCGACCTCGGCGAGAACGCCCCGTGTACGTA  
CCCTGGTGACCGAGACGAACGACTTCCGGGTGGATCCCGTCACAGGCGTGCTCACC  
TGTTCCGGCAGGTTGGACAGGGAACGGCAGGAGGTGTACGAGCTGAGGATACGGGCGC  
AGGACAACGGGGGCAGGGGGACGGACGCGCCCCCCTGTACTCGGACGCTTTGGTCA  
GGGTGATGGTGGACGACGTGAACGACAACGCGCCGAGCTTCGCGTTGCCAGTTACA  
CGGTGAAGATTCGCGAGGACGTGCCCCTGTGGACGGTGGTCGCCGTCTGTTGATGCCAC  
GGACCCGGACGAGGGGGGCGGGGGCGACGTGAGTACTTCCTGTCCGACGCCATGGA  
GAGCGAGGGCTACTTCAAGGTCGACAAGGTGTGCGGCACCATCAGGATCACCCAGAG  
CTTGACTTCGAGGAACGGCAGATGCACACGTTGACGATAGTTGCTAGGGACAGGGG  
CGAACCGTCCTTGTCTCCGAGACCATGGTTATCATAGACGTGGTGGACGTGAACGAG  
AACGTCCATCCCCATTGTTTCGACGACTTTGTCGTTTCCGCGAGCGTGTTTCGAGAATCA  
AGCTGTAGGCACCCTGGTAACCACCGTCCGCGCCAAGGACGCCGATCCCCTTGCGGG  
GACTCGAGGATCGGATACACCATACGTGGAGGGGACGGGATCGGGATTTTCTCCATCG  
ACAACGAAG

>novel\_circ\_000918

GTAACATCAAGACAAAGGCTGTGCTCGACGTGGAATCGAAGAGAGGATACTGGTTAAC  
GGTATACGCGCAGGATCACGGTGTAGTTCTTTGAGCTCCAGTTTACAGGTGTACGTGG  
AGGTGCTCGACAAGAACGACAACACACCATTGACCGAGGTTCCGGTCTATTATCCATC  
GGTCCTCGAGAACTCGCCGGCAGGCGTGAGCGTTCTCCAGATACGGGCGTTTCGATCGC  
GACGTCTCGCCTCAACGATTCACCTTCTCCATCACGAGCGGCAATCCGGAGGGTTATTT  
TCTCATCAATTCCACCACGG

>novel\_circ\_000919

GTAATCGCGAAGGATAAAGACATCGGAGATAATGGAAAAATTCAGTACAGTATCAAGG  
GTGGGCGAGGCAAGGGCAAGTTCAAAATTCATCCACAACCTGGAATGGTCTATTCTCA  
ACGAGGATTCGAAGCTGGACAGGAGTACGAGATGATGATAAGGGCGGCAGACTGCGG  
GGAACCGCAGCGCAGCCATCAAACACGGGTGTCCGTGCAAGTTGTCGAGGTACCAAA  
GGAATCCGAGAACCCGCCAGTCTTCAAAACGAACAATCAGAGTGTCGAGGTTACGGA  
GAGCGACAAGGTGCGGTTTCTCGTGCGACTGGTCCAGGCCACCGACAAAGATGGCGA  
CTATTTGTGGTACGATATCATTGACGGCGACAAAAGGGACGAGTTCTTCATCGGCCGGG  
ACAACGGGAACGTGCTGCTCGCGAAGAACTCGATTGGGAAACGCAAAACTTTTACA  
ACCTGACGATCCGCGTGACGGATAGCGTGGAATCTGCCGTGACTCAACTTCTGGTCAA  
CGTGATCGACATCAACGATCACAGGCCTGAATTCACGGAGAGCGTTTATCACGTGGAC  
ATCTCGGAGAACGTGGAAAAAGGGGAGAGGATACTTGAGCTTCACGCGAGCGACGAG  
GACGAGGACAAGAAAGTGTTCTACAGCCTTCACGCGGCCCAAGATCAAGCGTCGTTG

GAGATATTCCACGTGGATTTCGGTGACGGGTGCCGTTACGTTGAACGAGGTATTGGATCG  
GGAGACGATCGAGGAGCACGTGCTACCGTGATGGTTAAAGATCAAGGGACACCGGC  
GAAACGGAACACTACGCAAGGGTTGTAGTAACGGTGCACGATCACAATGATCATGCCCCA  
GAGTTCATCAGCGAGATAATCCAAGGAAAAGTGTACGAGACATCTCCCATCGGCGCTG  
CCGTGGTCCAAGTGTACGCCATAGACAGGGACAAAGGGGACAATGCCAAGATCACTTA  
CTCGATTACTTCTGGGAACGTGGGTAACATGTTACGATAGATCCGAATCTAGGCGTGA  
TCCGAGTTGCACGAGAATTAGATCTGAGCGCCTCCTCGGAATACATACTGTTGGTAAAG  
GCGACGGATCACGGCTCCCCGGCGTTGGCCAATACGGTGCCCGTACACGTGATGGTAA  
CCATGGCCGACAACGCGCCACCTAGATTCATCCAGAAGGAATTATCGGCCGAGATTTAC  
GAGAATCAACAGGTGGGCACTTACGTGAAACACGTGGAGGCAAGAAGCACGTCTCTCT  
CTGCAATTCGAGATCGTTCGAGGGAAACAAGGACGACACGTCTTCTGTAATCCGAGCA  
CGGGGATCATAGTGATCAAGAACGAGCTGGATTACGAGAAGACGAAATTTTACAACCTT  
GACGATAGCCGCGACAAACATGGCAAGCGCGAAGGCGCATTGCAACGTGATCGTCCA  
CGTTCTCGATCGAAACGACAACGCGCCGAGATTCCTGCAGGCCGTGTACAGCGGGGA  
GATAAGCGAGGGCGCCACTATAGGCTCCTTGGTACTCACCAATACGAGCACGCCATTG  
GTCATAAAGGCGGAGGACGCCGACTCCGAGCTGAACGCCCTCTTGAATTACGACATAG  
TGGAGGACTTGCCGCGAAAATACTTCCACATTGACTCGAGCACGGGCGCTATCAGGAC  
GGTAATGGTTCTGGATCACGAGACCGTTCTTAAGTTCACGTTCCACGTGAAGGTCTCC  
GATCTAGGGAAACCGAAACTGTCCTCAGAGACCACCGCAAAAGTGATGATCCTCGTCA  
CGGACGTGAACGATTGTCCGCCCAAGTTTCTCGAAAACGACTATAACACCACAGTGCT  
GCTACCTACGTACAAGAATGTAGCCGTGGTCCGAGTCAGCGCCGTGGATCCAGACAGT  
TCGGAAGGCGTCCCGCTCAGATACGACATCATCGATGGAAACAAGGCGCACACGTTCG  
ACATAGACTCCCAAACCGGTGTGATACCGTGTATAATCCGGAACGGATGAAGAAAAG  
TTATCTGTTACGGGTGCGCGTCTCGGACGGGAAGTACTCGAGCGTGTGCCAGGTGAAC  
GTGATCGTGGAGAAGTCGGAGAACTCTGGGCTGATGTTCCAGAAGGACGTCTACGAG  
GGCACAATACCGGAGAACTCGACTCGGATCACCACTGTGCGGGTCGTGAACGTTTTGG  
GGAGCGCGTTGAACGAGCACATTGTCTTCAGCATTCTGAACCCGACCGACATGTTTGT  
AATTGGATCCACGTCCGGCGCGATCCGAACCACCGGGATTAGATTCGACCGGGAGGTT  
TGCGACCATTACGAATTGATAGTGGAGGCGAGGAGTCAGATGCCGGGCAGGGAGAGG  
CCGAGGGTGGCGCACGTGATCGTGAACGTCCTATATTGGACATCAACGACAACCTGTC  
CAATGTTTGTAACTTGCCCTATTACGCCGTCTGTGCCGTGGAGGCGCAGAAGGGCGA  
CATTATCACGAAGGTGCATGCAATAGACATGGACAGCGGCGACAACGGAGAAGTTAGA  
TACGAGTTGAAGAAGGGCCACGGAGAGTTATTCAAGGTGTGCAGAAAAACGGGCGAG  
ATATCTCTGAAACAGAATCTGGAGGGTCACAATCGCGAATATCAGCTCACCATTGCCGC  
ATACGATGGAGGCATTACACCGTGCTCTATCGAGGTGCCGGTGAACGTAAAGGTGATA  
GATCGATCGATGCCAGTGTTCGACAAGCAATTTTACACGGACAGCGTGCTGGAAAGTA  
TCGAGATACATTGCCCCCTAGCTTTGTCCATACAGGCCGAGTCGCCGTTGAATCGCAAG  
TTGATATACAGTATAACGAAAGGGAACGATTTTCGAGGAATTCGCTCTGGATTTCAACAC  
AG

>novel\_circ\_000920

TAATGATGACTCGGATAATTGAAGGAGTTGCTCGGTTTCGCGGACACCAAGAAGAGAC  
ACTGAATGCAAGTCACGTGGTGAACACGTTTATACAAGACCGTTGGATACCGTGAATG  
AATTTGCGGATGCTACCAGAAATGTCTGCACCTTTGAACATGTTGTGCAACTTAACAGG

TTGACTCCATTCATTTGATTGATTTTTCTCTTTGGAATATTATGGAGAAAAATTACTGTAA  
TCGTGCATAGTCATTGACAAGCGGTTAGTTGTCGTGAAAAATGACGGACATCGTGCAC  
GAGCCGTGCAATTATGGAAGCTGTGTATGGCAGACGAAAGTCTCGGACCGCCCAGGCG  
GCCATTTTCGTACGATATTCTGATTTTCCGATGTTTAACTGGATGTGGATTTATCGCGCA  
GAATCAACTCAAAAAGAATCAACCGAAGGAACTTATAGTTACTGTTCTTTTCGTGCA  
TGAAAATCATCATAGAAAGAAGAGAGAGAGAGAAGAGAAAGAGAGAGAAAGAGA  
GCAGTGCAGTAGCGTGATACAGTGCAACACAGCAGACCGATAGAAGTACTGATTTTTTAT  
ACTCACAAGGACCATTGTTACTGTCGGGGGCTGCGAAACAGGGAGATACAACAACAC  
TTTAATTTCTAGTTTAATCAGATAAGCATTGATAAAGAAATAAATTAATAAGGGAGAG  
ATTGGTAAAGAGAGGAGAATTAATTAATTAATAAATAAATAAATAAATAAATGAATG  
AAATAAACTACTATAAATAAAAAATGGTAATAATAAATTGGAACGTAAATTTGAATTATCG  
TGTGGGGGGGGTGTGAATTAATCGAGATATAAATATAATTATTTACGATTAATTTTCAC  
GCTTACGAACAAATTAACCGTATAATTGTATAACTGCAGCTTGTGTTACGTGCGATACAT  
TCCAACATCCCCAATTTGCTACTGTTGTCTCACCCTACTACACCGTGACTTGATTAGAA  
TTTAGTCACCGAATACCATGTATACAG

>novel\_circ\_000922

CAGCAAAAATTCGTGAAGAGGACGGCCGAGGAGTTGGAGCCAGCCGGCGGCGGTAG  
CGGAGACGGTGGCTTCGGCGAGCCCCCGTGAAGCTGCAATGCACGCAGGCGCAGCA  
TCAGCACCAGCAGGGGGCCGGGGGCCGGCGGGGGCGGGGCCCGGGCACCACGGGC  
ACGGCCAGCACCCGGCCGGGAACGGGGCGAGCGCGACGGGGCCCGCGCACGGCGCG  
GGCGGGGGCGGCGGGGGCGGCGCCGGTAACGAGGGATTGACCAAGTTCTCGGTGGAG  
ATCGTGCAGCAGCTCGAGTTCACCACGTCGGCGGCCAACTCGCAGGCCCAGCAGATCT  
CCACGAACGTGACGGTGAAGGCGCTGACGAACGCCTCGGTGAAGAGCGACCTGCTCA  
ACGCGTCCTCGTCCCCCAAGTCGGGGCCGGACACCGGCCCCGCCCCGCCCCGGCCCCG  
GCCCCGGCGGCGGCCCCGCCCCGGAACCCAGGCGCCGGGACGGGGCCCCGCCCCGGG  
GCCGCCGGCGGCGGCCCCGCGCCCCCGGCGGCATCGGCTGCGTCGACATAGGCAAC  
CTGGTGGAGTGCAAGCAGGAGCCCGACAACGAGTTCGTCGATCTGGAGCAGTGCGCC  
GCCGCCCTGGAGAAGGACGCCGCGGCGAACGGAGCGGGTTTCCCCGGCTTCTCCGAC  
TTCATGGGCGACGACACCGGCGACGAGATCATCACCTCGGACGCGTTCAAGGACCTCA  
TCTCCGAGATATCCGACCTTCACCCGAGTTCATGAAGGACTTCGACTTCGAGGAGAA  
GATCCCCGTGGAGGCGTTGGCGGCGAGCAACGCGGCCGCGGCGGCGGCGGCGGCGGCG  
CGCGGCCGCCGTCGCCAACACGAACGGCAGCAACGGAGGGGGCGGCGCGAACAAACG  
GGCTAGGGACGAACAACGGGCAGATCAAGATCGAGGACGACAAGGACGGTGGATTGC  
ACCAGCAGCAACAGCAGCAGCAAGCTCAGCAGCAGCAGCAGCAAGCTCACGGGAGC  
GTGAACAACGGGAACGGCGTGGTGAACAACGGGCAGACGGGGGCCACGAACAACGG  
GACGGGGAGCGTGGCCGCGAATTCGAGCCCGGGCGCCCTCGCCTCCGCCAGTACTC  
GCCCCGACAGGTGCCGTACTCCGGCCTCGACTTCAAGTCGGAGATGAGCCCCGCGCG  
CAGACGTTGAAGCAGATGGCCGAGCAGCACCAGCACAAAGAGCCAGCAGCTGGGCCT  
GGGCGGCTTCAACCCGGGGGCGGCGGCCGCGGCCGACGCGCCAGGGGGCCCCGCCG  
CGCGTCCCCTTACGCCGAGTTCCCCCAATTCGGCGGCACGTCGGAACCTGGGCAG  
CCCTGGGAGCGGCGCCGGGGCCCCGGGGCGGGCGCGCAGGGCCAGGGGGCGGCCGGGG  
CCGGGTCGTATCAACAACAACGGGGCGGCCGGGTTCCAGGGGCAGCAGGCGGGCG  
ACATGTTTCGTGGGATCCCAGACCCAGTTCGCCGCCGGTCTTGCGGACATGAAGAGAGC

GCAGCCGAGCAGCGGCGGGAAGCCGAGCATGCTCGGGCCGAGCGCTGGTTACAAGCA  
GCAGTATTCGCCGTACGGCAGCCCGGGATCGATGCCGAATCACGGCAGCCCTGGCTAC  
CCGCTTCCGCCCAGGGGATCCAGGCCGGCGGACCCAATCAGACGGGATCCCAGGGA  
TCCTTCACCAGCTCCACGCCGCCGAGGCCTCCCTCCGGACCCGGCACCTCCACTTTGC  
AGATCAACCAGGCGCAGCAGTTACACATTAACAATCCCGGCCATCAGATTCAG

>novel\_circ\_000923

CAAAAATTCGTGAAGAGGACGGCCGAGGAGTTGGAGCCAGCCGGCGGCGGTAGCGG  
AGACGGTGGCTTCGGCGAGCCCCCGTGAAGCTGCAATGCACGCAGGCGCAGCATCA  
GCACCAGCAGGGGGCCGGGGGCCGGCGGGGGCGGGCCCGGGCACCACGGGCACG  
GCCAGCACCCGGCCGGGAACGGGGCGAGCGCGACGGGGCCCGCGCACGGCGCGGGC  
GGGGGCGGCGGGGGCGGCGCCGGTAACGAGGGATTGACCAAGTTCTCGGTGGAGATC  
GTGCAGCAGCTCGAGTTCACCACGTCGGCGGCCAACTCGCAGGCCCAGCAGATCTCC  
ACGAACGTGACGGTGAAGGCGCTGACGAACGCCTCGGTGAAGAGCGACCTGCTCAAC  
GCGTCCTCGTCCCCCAAGTCGGGGCCGGACACCGGCCCCGCCCCGCCCCGGCCGCGC  
CCCGGCGGCGGCCCGCCCGGCAACCCAGGCGCCGGGACGGGGCCCGGCCCGGGCGC  
CGCCGGCGGCGGCCCGCCGCCCGCGCGGCATCGGCTGCGTCGACATAGGCAACCT  
GGTGGAGTGCAAGCAGGAGCCCGACAACGAGTTCGTCGATCTGGAGCAGTGCGCCGC  
CGCCCTGGAGAAGGACGCCGCGGCGAACGGAGCGGGTTTCCCCGGCTTCTCCGACTT  
CATGGGCGACGACACCGGCGACGAGATCATCACCTCGGACGCGTTCAAGGACCTCATC  
TCCGAGATATCCGACCTTACCCCCGAGTTCATGAAGGACTTCGACTTCGAGGAGAAGA  
TCCCCGTGGAGGCGTTGGCGGCGAGCAACGCGGCCGCGGCGGCGGCCGCGCGGCC  
GCGGCCCGCGTCGCCAACACGAACGGCAGCAACGGAGGGGGCGGCGCGAACAACGG  
GCTAGGGACGAACAACGGGCAGATCAAGATCGAGGACGACAAGGACGGTGGATTGCA  
CCAGCAGCAACAGCAGCAGCAAGCTCAGCAGCAGCAGCAGCAAGCTCACGGGAGCG  
TGAACAACGGGAACGGCGTGGTGAACAACGGGCAGACGGGGGCCACGAACAACGGG  
ACGGGGAGCGTGCCGCGAATTCGAGCCCGGGCGCCCTCGCCTCCGCCCAGTACTCG  
CCCGCCAGGCTGCCGTACTCCGGCCTCGACTTCAAGTCGGAGATGAGCCCCGCCGCGC  
AGACGTTGAAGCAGATGGCCGAGCAGCACCAGCACAAAGAGCCAGCAGCTGGGCCTG  
GGCGGCTTCAACCCGGGGGCGGCGGCCGCGGCCGACGCGCCAGGGGGCCCGCCGC  
GCGCTCCCCTTACGCCGAGTTCCCCCAATTCGGCGGCACGTCGGACTACCTGGGCAGC  
CCTGGGAGCGGCGCCGGGCCCGGGCGGGCGCGCAGGGCCAGGGGGCGGCCGGGGC  
CGGGTCGTATCACAAGAACAACGGGGCGGCCGGGTTCAGGGGCAGCAGGCGGGCG  
ACATGTTTCGTGGGATCCCAGACCCAGTTCGCCGCCGGTCTTGCGGACATGAAGAGAGC  
GCAGCCGAGCAGCGGCGGGAAGCCGAGCATGCTCGGGCCGAGCGCTGGTTACAAGCA  
GCAGTATTCGCCGTACGGCAGCCCGGGATCGATGCCGAATCACGGCAGCCCTGGCTAC  
CCGCTTCCGCCCAGGGGATCCAGGCCGGCGGACCCAATCAGACGGGATCCCAGGGA  
TCCTTCACCAGCTCCACGCCGCCGAGGCCTCCCTCCGGACCCGGCACCTCCACTTTGC  
AGATCAACCAGGCGCAGCAGTTACACATTAACAATCCCGGCCATCAGATTCAG

>novel\_circ\_000925

GTGTCCGCGGGTCAGCACATGCAGCTAACAGGCGACCTGAAACCGGGGGTATCGGTG  
GCGGCCCAGCAAGGCATGTACTTCAGCCAGCAGCAAACGCAGAATCAGTCGGCCGGT  
CAAACGGACACGTACTGCTCGGTATCGCAGTCCAGACCATCAACTTCACCCAGCAGA

GCCTGAGACAGAGGGCCGCGGCCGCGGCAGCGGGCGGCGTCCCCCAACCCGCCGGC  
GCTGCGCCGGCACGCAGCCATCCCCAGCAAGTGCAGCCGAACCAGGTGGATCAACAT  
CAACACGCGAAAATTCTTCAACAACAGCAGCTGATGCGCGCCCAGCAG

>novel\_circ\_000926

GTGTCCGCGGGTCAGCACATGCAGCTAACAGGCGACCTGAAACCGGGGGTATCGGTG  
GCGGCCAGCAAGGCATGTACTTCAGCCAGCAGCAAACGCAGAATCAGTCGGCCGGT  
CAAACGGACACGTACTGCTCGGTATCGCAGTCCCAGACCATCAACTTCACCCAGCAGA  
GCCTGAGACAGAGGGCCGCGGCCGCGGCAGCGGGCGGCGTCCCCCAACCCGCCGGC  
GCTGCGCCGGCACGCAGCCATCCCCAGCAAGTGCAGCCGAACCAGGTGGATCAACAT  
CAACACGCGAAAATTCTTCAACAACAGCAGCTGATGCGCGCCCAGCAGGTGATGCAA  
CAACAACAACACATGGCCGGAGGAATGGGTGGCGTGAGACCGCCACCACCCGAATAC  
AAAGCGGCTCAGGCCCAAATGATGCACGCTGGTATCGGTATGGCTCAACAGGCCAGGT  
TTCCAATACCGGGCCTATGCGCAGGGTTACGCAACAACCCATGCCACCTTCAGGTCC  
GATGATGAGGCCGCAAATGGCGCAGCAACAACAACAGGCGTTGCACGCCGCCGGTGG  
CAATATGTACATGGGCGGTGGTAGTATGGCCGCGATCGGCGGCATGCATCAAATGCATC  
AGCGTCTTGATATCCTAGGACCAACAATCAACGGCCGCCTAACGTCAGCGTTGGCCC  
GCCAGATGGCCTTGTAATAGCATCGCTGGCCGTGGCGCGCAGCAGGAGTGGCGACAC  
GTTCTCATGCAGCAGCAGGGCTTTCAGGCGCAGATGCGATCGCAATTTAATCAGCAAG  
GTCACCAAGGTGGATTTCGGTATGGGTGGCACGGGTGGCATGCAGATGAACGCCGCACA  
AATGCAGCATCAACAGTTGATCCGCTCGCAGAGCGGGGGTATAGCGGGCTCCGGTATG  
GGCAACAGCACTCAGATGCAGCAGCTACTGTTCGAGCAACACCAGCAGCAGACATTG  
GCCATGCAGCAGAGTAATAATCAGATGTCACTGCAGATGCAAATGTCGAGTCCTCGTC  
GGTCAACTCTGTCAGCAGTACTGGAAGTGGTTCCCCCTACACCCGCATCAACAATAC  
GGCGCTGGCAGTCCAGGAGTGCGCAGTTTGCCACAACAGCAACAGCAGCACGCGCAA  
CCGCCAGTCACCACCACCGGATCCATCCGTAACCGCGGCGGACTTTAGCCTCGAAT  
TTCTAGAGAATCTTCCGGCCGGAGACACGTCGAACCTTCAGCGCTCAGGAACTGCTGAA  
TTCCCTTGACTCCACGGGGGGCTTCAACCTCGATATTCT

>novel\_circ\_000927

ACGGACCTCTGCGGTATCAAATGGAAGAAGCTCGTGTGGGGCGAAGTAGCCGGCGATT  
TCGGGGGTACTCCCCTCGAGGACCCGGTGTGTGTCGAGCTTCTCGCGGTGCCTCGCGGG  
TGACATTCTCTGCGTGTGGCGGCGGGTCGCCGCTACGCCGGCCACCTCCGGCCCCGCA  
ACGCCTCGGCAACCGGAGCTGGCATCTTCGACCTGGGCATCGCACCCCTCGCCGCAC  
CACCACCCCTCTCCCTTACCGCCGCCAAGGAACTCTGGATTTTCTGGTATGGCGAGGA  
ACCTGATCTCTCTGGTCTCGTGTACCGGAACTCATCGCGTGTGAAAGTGAGCAAGGT  
TCTTGGGAAAGCGGATTATCATACGAGTGCCGGTCACTTCTTTTCAAAGCTTTGCATAA  
CTTGATTGAACGGTGCTTACTATCTCGTGATTTTGTTCGCCTAGGAAAGTGGTTTGTAC  
AACCTTATGATGGATTCGAAAAACACCGTTGCAGTAGTAGTCACTTGTCATTCTCATT  
GCATTCTTTGTGCATGGAGAAAGCACTGTATGTGCAAGTGTGGATGTCAGGCAGCATC  
CTGCTGTGCGACATCTTACAAGGACTTGCTTACAACGTACCCAAACTTCCAATCTGGT  
GTAAAGTGATTCTAGCTCCTTATGGACTAGCAGGCACATTAATTGGTCCAGTGGGACG  
TATAGATAGTCAACTTCTTGAAGAGTGGAACACTTTTATCCAATCAATAGCAGTAACAT  
AGAAGCAGGACTTCCACCTCTAGTAGAAGTACTTGTTGGTGGTGTCCGCATGCGTTATC

CTTCTTGTTATGTCCTGGTCACAGATATGGATGATAGTCCACCTGATACTCCTCTTTCTC  
CACCAAGTAGTCCTGCTAGTTGTGAACATCCTCTCTTGAGTCAGCAGGAATTACAAGC  
AGCTACAGAATTACCAGAACGTGTATGGGCAGAATGTACTTTGAGCTCACCAATTTCTG  
CTTCCAAGACAGAATCTTCCACAGAACTTGGAACCTGGACCTTTATTGATCCAACACA  
AAAGTCTTCCTGTATCTGTTCAAA

>novel\_circ\_000928

GTGATCATGGCTAATCGGGGTACAGCCCAGAGGCCGAATGGTTCGACACAAGGAAAGA  
TTTGTCAATTTAAGCTGGTATTACTTGGCGAATCTGCTGTGGGAAAGTCAAGTCTTGTT  
TTGAGGTTTGTTAAAGGACAGTTTCATGAATATCAAGAAAGTACTATTGGAGCTGCATT  
TTTAACACAAACTGTATGTTTGGATGATACAACTGTAAAATTTGAGATTTGGGATACAG  
CAGGGCAGGAACGTTATCATAGTCTTGCACCAATGTATTATCGTGGTGCACAAGCAGCT  
ATTGTTGTATATGATATAACAAATCAAGACACATTTGTACGTGCCCAAACGTGGGTGAA  
GGAATTGCAACGACAAGCCAGTCCAAGTATAGTTATAGCATTAGCTGGAAATAAAGCT  
GATCTTGCAAATAAAAGAATTGTAGAATTTGATGAAGCTCAAACCTTATGCTGATGAAAA  
TGGCCTTCTTTTCATGGAACTTCAGCTAAAACAGCAATGAATGTTAATGATATATTTT  
GGCAATTGCTAAAAAACTTCCAAAGAATGAACAATCAGGAAGTGCAAGTACAAGTGG  
TCAAGGCCGTCGATTGGTTGAAACAGAAGGACAAAAGGCAGCAACTGGCAATTGTTG  
CAAGTGATTATCCAAATCT

>novel\_circ\_000931

GTAATTTTTTTTCGTGTATTATTAGTATCAACATTGAAATTAAATTTTCGCGTTTTTTTAA  
TCCACAGAAAAACACACTTCCACTTTTACAAGTTATTCAAGATCTTAAATTGAACTGT  
ACTTTTTTACCTAGAAATGTAAAGAATACAATGAATTTATAACAAAGGTGTAATAGGATG  
TCGTTCTTACCAATTAAGTAAATTAGAATATTTGCCCGAATCGTCGATGTATTAATAATTAC  
GACACAAACTGTGGATCTATTTCAAACAAGTTATTACTATTAGTAATAA

>novel\_circ\_000932AAGAAAACAGTCGTGGCAGTACAAAAGCAAAATGGTATAATTGAA  
CAAAATTATAGTAAAGAAAGTAGTGGTAGTGCTGTTGAAAGTAGGGGAAAGGAAAATA  
AGGAACAAAACCATTGTCAAGATGATAATGAAGAACATATAGATGGTAGTGAAAAAAA  
AAAGAAAGTAAATAAACAAAAATGGGTACCATTAGAAATAGATATACAAAAAACCGA  
AGTAAAAGAGATCGTTCTCCAAAGTATCACAATCAAAGAGAAAAGAATGGAGAAGAA  
ACAGATTCGTATAGAAGTAGGGAACATGATAGACCTGCATATATCACAAGAGGTGGACG  
AGGTGGACGAAGTTACAGAGGAAGAGGAGGACGAGGTGGACGAGGCGCCTACCGTG  
GTAGTTTTAGACAGAGGCATGATCAAGTCTACATGCAGATGCACAAATTTGGGCTTCTA  
GATCCTAATTACATGATGGCTTACATGGGAACGTTTTATTTTAATAATACAAATTCATTA  
ATATAAATACAACAACACTCAAAGAATTTTTAAGAAATCAAATAGAATATTACTTTAGCG  
AGGAAAATCTTCTAAGAGATTTTTTTTTTGCCTCGTAAATGGATGCACAAGGCTTTTTTA  
CCTATTACTTTAATTGCATCTTCCATCGTGTACAACTTTGACGACAGATGTTGGACTT  
GTTATTGAAGCAATTATGGAATCTGATAAATTAGAATTAGTTGATGGATTAAAG

>novel\_circ\_000933

GATGAATTTGCTGGTGATGGTGTTGATTTATATGATGACGTGATAGCAGCTCCTGCTGGT  
GGTAATGGCGGTGTTTCTACAGGAAATAGTGGAGATGGCGGAGGTGATACTACTTCAC

CAAATGAAGAAACAAATGGTAGTGCACCTTACCATCAACTTGGAATAACATCCAGCC  
AAATCAAATTGGAAGACGTCATCAATTATATGTTGGAAATTTGACTTGGTGGACAAGTG  
ATCAAGATATAACTGATGCAGTACAAAGTATTGGTGTATCAGATTTTGTGTAAGTAAAG  
TTCTTTGAAAATCGAGCCAATGGACAATCGAAGGGTTTCTGTGTAATATCCCTGGGTTT  
AGAACAAGCATGAGAATATGTATGGAAAGATTACCTAAAAAAGAATTACATGGACAG  
AATCCAGTAGTAACATTTCTACTAAACAAGCATTGAATCAA

>novel\_circ\_000934

TGGCCAACGTGGTTCTACAGGCCGGATTTCCTCCCTCGGCACTCAACTGCCCACCGGCC  
ACGTGTCTGAATCCAAGCAACGTTCTACTTCGTCCCTCTGTGCCCCAGGACGACTCA  
CTTGCAATCAGAGGCGTCCAAGGTTCCCGAGTTTCTCGATAGCAGCAAAATCCATGGA  
CAGACGCCGACGATATGCACG

>novel\_circ\_000935

AAAAGCCCGACGAAAGGAGAAGGATGCGGGAACAACAGAGGATCCGAAATTGTATCT  
CGAGGAGGCGGCTCTTGAAAGGCAACTGCCAGAGCTGGACTTGAGGATGTTGGTCGA  
TTTGCCACCTGGTTTGGATTACAACGAATGGTTGGCCTCTCATACTCTTGCCTATTTGA  
TCACATCAATCTTGTTTACGGAACGATATCCGAGTTCTGTACGATGACGGGTTGTCCTG  
ATATGACCGGTCCTGGCTTAAGAACTTATCTGTGGTTTGATGAGAAAGGAAAGAAAAC  
GAGAGTGGCAGCGCCACAATATATAGATTATGTTATGACTTTTACACAACGCACCGTTA  
GTGATGAAACTATATTTCTACGAAATATGCAATGAATTTCTAGCTCGTTTGAATCGA  
TAGTGCGTAAGATCCTGCGGCTACTGTACCATGTGGTGGCACACATTTACCACTGCCAC  
TTCAGAGAGGTAGCACTCTTGGGGTTGCATGCTCACCTTAATTGTGTATTTGCCACCT  
CACGCTCCTTAATCAACGCTTCAACCTTATCGATCCCAAGGAAACGGAGATCTTAGGAG  
ATTTAGAGGCTGCCCTCTTGGGTGACTCAACGTCTTCATCAGCGCCTTCTTCACAAACC  
TTAGCCATTCAGGAGACTCCGACCACAGCCACCTAGATCGCGATGCACAGCAAGCAAA  
AGGTTGCAGTTCCTGAGACTAG

>novel\_circ\_000937

GTTGTCCAGGCGGCACCGGTCCCCGTACCTGTCCAGGTACGTAGCAAGAACGATGGCT  
CGGGAGTGGTGGCAGCGTCCGTGTGCGGGGTACGGAGACGAAGCGGCTCCAGGGTT  
TACGATCGCCCGCCGCCAAGAGGCCACTCTCCGCCCCCGTGGCTCTTCAGGGATGGCT  
ACACAAACAGGGATCCGAGGGGCTGATGCTGTGGAAGAAACGGTGGTTTCGTCTCTC  
CGAGTACTGCCTCTTTTATTACAAAGGTCCCGAAGAGGAGAAATTATTGGGTTCGATAT  
TGTTGCCATCGTACAGAGTTACCGTGTGCAAACCGGAGGACAAGGTTAACAGGAAGTT  
CGCGTTCAAAGCTGAACACGCGAACATGAGGACGTATCACTTCGCGGCCGACAGCCG  
TGAGAGCATGAACCAATGGGTGAACGCGTTGACTTTGGCGACCCTGCTTCAGGATCCA  
AGCCC

>novel\_circ\_000939

CGGAGGGGGCGAGGCGGCAGTGGTGTATCGAGATAGGAGGGGGGCAGCAGGAGGGCG  
AACGAAGCGCGAGGCCAGCGTCTCCTCCATATCCTCGATCCTGAACCAGAGCGCGGA  
CGACAGCGATTCGGGTTTCCACGTTTCCAATCGCGGGACGATCCAGCCACGCGTCC  
AACAACAACCTCGAGCCCGAACAGCGTGAACACCGCCTCGTTTCCGAACCTGAGCGGC

AGCAACAACGGGAACAGCAACAATGGGAATAGCAGCGGCAACAACGCCAACAATAAC  
GCCACCATCACCGTCACCAACAACAACAACAACATCAGCCTCGCCGGGAACAAC  
AACAAACAACACCACCAACGACGTTCAACCGATGGTGAACGGTTGGATCCAACAA  
CAGCAATCGCCTTACGGCCAACCGAGCACTTCTCAACAACAACAACAATACGGCCAAT  
TGATATCATCCGTCGTGATGGCCGGCCAACCGTCCCTGCAACAAACCCACCACCACCA  
CCACCACCAAGCGTTGCTCCACCAAACGCACCTTCCCCACCCAACTGCTACCCAGATC  
CTTCAACACAACAAGCAACAACAACAATCTCAACAACAGTTGCCCAACGTGCAAACCT  
GTCCAACCTATGCCGAGGAAATTCGGCCAACCGATCTACGCGAACGCGCCGCTAAAC  
CCAGGCGGATAACCGACGGCTCGACCGAGTACTCCACCCCCTCCCCGGACCCCGACTA  
CAGAAAATCGCCCGTCTCGCCGGACGTCGCAAGCATGGCAGGCGGCAAGAGTCCAAT  
GCCCCGACTACGAAAGGAGTGCGCGCATCTATGGTGGGGCGGGTAGAACTGTTGCCGG  
GCAACAGAGCCTCAGGACTGATAAGTCCGGCCTGAATTACGGTTACGGGGGGGGGCA  
GGTGCAGGCGCAGACCGAGCGGCGCACGCCCAGACGTACGGTCGCAGCGCGGCTAA  
ACCGCGGCCGGGGAGAGGGAACGGGGACTACGAGGAGGTTTACGGGGCGCCCCAGT  
TGTACCAGAGGCCGGCAGGCCCGTCGGCTACACGAAGGGGGCCTCGCCCGCCCCGA  
TCCCGATCCCCCTTTACGCGCAACAACAGCAACACCATCATCAGTACCAGCACCAGAT  
ACATATCGCGACCACGAACGTGCCGATAATGAGACAGCCGAGGGCGCAGCCACCGCC  
ACGGCCGCACAGCGCTGACTTCTTGAGTACGAGGCGATCAGGAAGCCTCAACAGCA  
GATGCCGCCGCAGTGCGAGGAATCGGTGAACCAACAGAGGCGTCCACAGAGGCCTAA  
ATCGAGTTTAGACATCGTCACTCCGTCGGACGCAGCGAACGATGGATACTTTTATTCCG  
AGGAAAGATACGCGGCACAGATGCGGCAATCCGCGGTTTATCTCCACCAGACGCCCCA  
GCATCACCAGCAACAAAGGAACCAATCGCTTTCCCGGACGACAATGCCCTCGAAAGC  
GACCGGGATCCGCGACAGAAGCGTAGACGAAAGTAGGATAGCTACGCTACCGGAAGT  
TTCCTGCTCGGGCCTGAGGCGGGGACAACACGTTCATCAGCAACACGTGATACCTCAC  
CAATCGCTCCAACGGCATAACCGA

>novel\_circ\_000940

TGCCGATAATGAGACAGCCGAGGGCGCAGCCACCGCCACGGCCGCACAGCGCTGACT  
TCTTGAGTACGAGGCGATCAGGAAGCCTCAACAGCAGATGCCGCCGCAGTGCGAGG  
AATCGGTGAACCAACAGAGGCGTCCACAGAGGCCTAAATCGAGTTTAGACATCGTCAC  
TCCGTCGGACGCAGCGAACGATGGATACTTTTATTCCGAGGAAAGATACGCGGCACAG  
ATGCGGCAATCCGCGGTTTATCTCCACCAGACGCCCCAGCATCACCAGCAACAAAGGA  
ACCAATCGCTTTCCCGGACGACAATGCCCTCGAAAGCGACCGGGATCCGCGACAGAA  
GCGTAGACGAAAGTAGGATAGCTACGCTACCGGAAGTTTCCTGCTCGGGCCTGAGGCG  
GGGACAACACGTTTCATCAGCAACACGTGATACCTCACCAATCGCTCCAACGGCATAAC  
GAAATGAGCAGCAACGAGGCGAAGCTGAGGCGGTTCGTTGCGGGAGAAGAGTTACGA  
GGCGAGCAGCCGAGAAATGCTGAGTCACATGGCGGAGGAAGGGACGGTGCCGCGAA  
GAATTCCACGCGAGTACGAGTGTTTCGATGGGGTGGGGAAACAGGGGGACGAGTCAGG  
GTAGCGCTCACGTGGGCCAACCGTGTCACGCTCCTCACGCCGCCGCCAGACGATGGA  
ACGAGCAGCAACAGTTCTGCAGGTCGGCGTCCGCGCGTCTACCGAGGACCAGGCACC  
CGGCCACCTTGGACCCCGACGACGACGATTACGAACGATCGTCCGAGCAGGACTCGC  
GGGATGGTGAACGAAAGATACAACAG

>novel\_circ\_000941



CGTCCGGATCCGGATCGGTGATAGGAAGGGATCCGCTTCCGCCGAGGGCTGTCAGCAC  
TTCGCAACTCGCTCAAAGGACTCAAACCTCAACCCCCGGCTACGGTGTCCACCCTTCCG  
TTGCCGAGGAGCAATGCCACGCACAGGCAGCCCCTGCCCTCCACCAGTCCACCCCTC  
AATCGGTGACACAATCGGAAAACGACGCGAGCAATTTCGAGCTATTACGAGTCGCCAG  
CAATGGCGACATCGGGACAGGATCTGCAATGTTGAACAACAACAACGATGGAAA  
GGAAATAAGGTTAACTTCTCCGGGCGGGCACGCAACTCAACGATTGATGAGTCCGGCC  
GGAGCGTTAAGGGTCATTTCCATGAACGACCACCGTGTCTCTAGCCCTAGTGACAGCG  
ACATACGAGTTCACAGCCCAA

>novel\_circ\_000942

CGTCCGGATCCGGATCGGTGATAGGAAGGGATCCGCTTCCGCCGAGGGCTGTCAGCAC  
TTCGCAACTCGCTCAAAGGACTCAAACCTCAACCCCCGGCTACGGTGTCCACCCTTCCG  
TTGCCGAGGAGCAATGCCACGCACAGGCAGCCCCTGCCCTCCACCAGTCCACCCCTC  
AATCGGTGACACAATCGGAAAACGACGCGAGCAATTTCGAGCTATTACGAGTCGCCAG  
CAATGGCGACATCGGGACAGGATCTGCAATGTTGAACAACAACAACGATGGAAA  
GGAAATAAGGTTAACTTCTCCGGGCGGGCACGCAACTCAACGATTGATGAGTCCGGCC  
GGAGCGTTAAGGGTCATTTCCATGAACGACCACCGTGTCTCTAGCCCTAGTGACAGCG  
ACATACGAGTTCACAGCCCAAATTGAAAGGAAAATGGTGAGCCCAATCGGCAGAGAAG  
TGGATCGTGGTGGAGGCACGGCTATTAGACAGAATCAACGTGTATGGGAGTACAACGA  
GTTGCTGCACAAAAGG

>novel\_circ\_000943

AGTATATGGTCTTGCTGTAAGACGATTATTGGAGGAATATGGATTGAAATCAGAAGAAA  
TTAAAGGTACTGGTCGACCTAATCGATTATTAAGAAAGTGATGTTTAACTTATATTCAA  
CAAAGAATATAAAAAAAGTTGCACCAAAAACAGCACCTCCACCTAAAGATCAAAAGC  
AACCTGATATTCCTTTAAAGAAACATGTACCCAGTGGTGGTCCCTCCACTTATCAAGATA  
TTCCAGTTTCTAATATACGCAGTATCATTGCTAAAAGACTTGGAGAATCAAAAATAACTA  
TCCCGCATTCTTATGCGACTATCGATATTAAGAAATTGATAAAATAAATGAAATTCGTAAGG  
AACTCAAGGCTGATGGTATTAATATTTGATAAATGATTTTATTACAAAAGCAACTGCAC  
ATGCACTAGTTGAATGTCCATTTATAAATACATTATATAAAATGATCAATAATTCAAAT  
GCCAAGAGTTGATATTTCTATCGCAGTTGCTATTGAATCAGGACTTATTACGCCAATTGT  
TTTTGATGCTACAGCTAAAAGTATATTGGATATTTGAAAAATATAAAGGAATTAGCTGA  
AAAAGCTAAAACCTGGTCAATTAAGACCGGAAGAATTCCAAGGAGGAACATTACAATA  
TCCAATTTGGGAATGTTTGGTATTAAGCATTTCAGAGCCATTATAAATCTTCCTCAAACA  
GCAATATTAGCAGTTGGAAGTGGTCGAGAAGAATAAATGCTGCATTACAAAAAGTAA  
CAAAAATGTCAACATCTTTATCGTATGATAGACGAGCAATTGATGAAGATCAAGCAGCT  
GACTTTTTAGCTGTTTTAAAGCTATGTTGGAAGACCCATCTTTTCTTATTGCAGGAAGA  
TTACGAGCACTAAG

>novel\_circ\_000944

GTGGTATAGCGTCATGTATAAGAAATTTTCGAACCGACTTTCTGGAGGAGTGGCCAACT  
CCCGGCACAGGGCCCCATTTTCGACACCTCGATGCAGTCCAACCTCACCGGATTGGTGG  
GGAAAACCGTGCATCTGGTGTGCAAGTGAAAAATCTCGGCAATCGTACGGTTTCCTG  
GGTGAGGCATCGAGACATACATCTGTTGACGGTCGGCCGTTACACGTACACGAGCGAT

CAACGGTTCGAGGCGTTGCACCTTCCCCACGCCGAGGAATGGACGTTGAGGATACGAT  
ATCCTCAGAAGAAGGATTCCGGTATTTACGAGTGCCAAATATCAACGACACCGCCTATC  
GGCCATCCCGTTTACCTGACTATAGTCGAACCGATCACCATCATCATAGGAGCGCCCGA  
TCTGTTCGTGAACAAGGGTAGCACGATCAACCTAACCTGCGTGGTGAAGTACGCCCCG  
GAACCACCGCCCATGATGATCTGGAGTCACAACAGCGAG

>novel\_circ\_000946

GTTAGTATCGTTTCGTGTAAACTCTCCGGGGAAGGGGGGGGAAAAATGGACGGTAAAT  
CACAGAGTTTAGAAAAATCTACCGATATCGCTCTCCGATTACACGGTAAGAGAAATCGTT  
GAAGGAATGCGCAACCGCTGCGTTATATTGTCTTCATAATATTCCCGAATGAATTCATCG  
ACGAAAGTTGAAAAAAAAAAAAAAAAAGAAAAGAAACGATAATTAAGCATTTTTCTGACG  
GATTCAATTTGAATCTTCGATACGATCTTATTACAAAAATTTTTATGAAGTTGGAATAG  
ATATGAAATTGTAGATAAATTTATTTTTTATTTTCTACGAATTAATAAAAAAAAAAAAAAT  
TGATAATTCACGTTGGAAAAGAAAAGTAGATATTGGAATCAGTATGGAAATAACTCGAT  
ATTAGTAACGTTAATTACGACATTAATAACGATTTAGATCGTTTCTTATTAAGATTAATTG  
ATACGCGAGGTTATAATAATTTCTACTTTTTTTTTTTTTTACACAACCTGTTTTTTTTTA  
GACACGCAGAATTTGCAGAATCGATCGCAGAAAATGATTCATGCTCGACCTCGACGGT  
CCAAGTCTCGACACGTGTTAATACACGTAAATTTTTTCTTTTTTCTTTTTTTCGAAAATTC  
GATTCTTGTCGAAAAAAATCCGAATCGAACGTGACGATCTTCCAACCTCCTCTCCTTT  
CCCTTCTTTATTTAATAATCTCGAAATGAAAATTCATTATTGATTTATAAATCGATTTAA  
AGGGATCAACAAACACACGTTTCTCGATATTTTCGTAATAGCCGATAATTGGTCGAGATA  
CGCCTCACGGTCGTGAAAAATTGTTAATATATTGTAGCAAGGTGGGAAACACGTGATCG  
GGCTTGCTGCGCGAATTATAACAAGTACAAAGCGGTGGAACAAGTGCAGCAACGAGA  
TGGGAGGGGTGGGGGTAAACGGAGGACAAACGGTGGTGGACGAATAGCCAAGCAAAG  
TCGAGCACAACCGAGCGAGCAGCTGACGCGGCGAAATCAATATTCCCACGTGAAGAG

>novel\_circ\_000947

GTTAGTATCGTTTCGTGTAAACTCTCCGGGGAAGGGGGGGGAAAAATGGACGGTAAAT  
CACAGAGTTTAGAAAAATCTACCGATATCGCTCTCCGATTACACGGTAAGAGAAATCGTT  
GAAGGAATGCGCAACCGCTGCGTTATATTGTCTTCATAATATTCCCGAATGAATTCATCG  
ACGAAAGTTGAAAAAAAAAAAAAAAAAGAAAAGAAACGATAATTAAGCATTTTTCTGACG  
GATTCAATTTGAATCTTCGATACGATCTTATTACAAAAATTTTTATGAAGTTGGAATAG  
ATATGAAATTGTAGATAAATTTATTTTTTATTTTCTACGAATTAATAAAAAAAAAAAAAAT  
TGATAATTCACGTTGGAAAAGAAAAGTAGATATTGGAATCAGTATGGAAATAACTCGAT  
ATTAGTAACGTTAATTACGACATTAATAACGATTTAGATCGTTTCTTATTAAGATTAATTG  
ATACGCGAGGTTATAATAATTTCTACTTTTTTTTTTTTTTACACAACCTGTTTTTTTTTA  
GACACGCAGAATTTGCAGAATCGATCGCAGAAAATGATTCATGCTCGACCTCGACGGT  
CCAAGTCTCGACACGTGTTAATACACGTAAATTTTTTCTTTTTTCTTTTTTTCGAAAATTC  
GATTCTTGTCGAAAAAAATCCGAATCGAACGTGACGATCTTCCAACCTCCTCTCCTTT  
CCCTTCTTTATTTAATAATCTCGAAATGAAAATTCATTATTGATTTATAAATCGATTTAA  
AGGGATCAACAAACACACGTTTCTCGATATTTTCGTAATAGCCGATAATTGGTCGAGATA  
CGCCTCACGGTCGTGAAAAATTGTTAATATATTGTAGCAAGGTGGGAAACACGTGATCG  
GGCTTGCTGCGCGAATTATAACAAGTACAAAGCGGTGGAACAAGTGCAGCAACGAGA  
TGGGAGGGGTGGGGGTAAACGGAGGACAAACGGTGGTGGACGAATAGCCAAGCAAAG

TCGAGCACAACCGAGCGAGCAGCTGACGCGGCGAAATCAATATTCCCACGTGAAGAG  
GTGAACGATGTAGATATATAGGAGAGAGAGAGAGAGAGGGGCAACGTGAGCGCCGCA  
CCGCGTCGAACCGCGCCGTCTTCTTCTACCACATTTTTCTTCGTCTCGCGTTATTTCGT  
TTATTTTCTTATCTCTCTCGGTTCCCGGTAATTCCTCGCCTTCGATACGATCTCTCGCTG  
CTACAAATTAACAACTAACTCTTGGCCAGAGCGTGTTAATGCGTTGCTTTGGAAAGAT  
TTGAAGCGTAATATACATTGCAACCGTTTGCAATCGTTCATTAAACGGTTTTTCGAAAA  
ATTTTTCGCAAAGAAAGGATTTCGAACACGGATTCTACAGATATAGATATATGTAGGAAA  
AAAGAAATCGTTTCTCCAGATGATTATCTTTTATAGATATTTTAGAAATTAATTTGGAACA  
GGTTTATATAGCTTTTCAAAATTGATAGAAAAAAAATGAAAAGAATATTTAATTATTG  
GAGTATATCGTAGATCGGTAAAAAAAACCGATTGGCGCGTTCTTGCAGAAAATGTCAC  
GTGACCGAAAACCTCGAGATTAATTCGTCTGGAGCAGGGGGTGATAAACACGTTAGAA  
GCACGATGGAGGCATATCGGCATCCGTTAACCATGAGATTGAGTCGAAGAGATTGAGG  
GGATTATATATATATACATGTATATAGGGGCAGAAATAAAGAATGAGCATATGAGCGGG  
GGTTGGAGAGGGGGGAAAAACGAAACGGCAGAAGCGCAGGCGGGCGGCCGCAATCA  
GGTGACAAACCCTACGTCGCGGCATCGTCGCCGTTGCCCCGCGTGGTCGTAGTGTGGTC  
TCGGTAGTCGCGCGCACTTTCGGTCTTCTCCTACTCCTGTCCCCCTATCCCCCTCCGCC  
CCCTCCCTCCCTCCGCTGTCGATCTCGACCTGTGCGCCAGTGTTTCTGGACGAGCTT  
CCTCTCGGTCTGTATAGGATCTCGCCGCGCAGCAAACATAGAGAGAGGAGATGAGAGA  
AAGAGATCGCCGGGAGTCGCCGGCTGGCACTCGTGTGACGCGTCTCGTTGCGTTTGTT  
TCGCACGGTTTCGAACCGTTGCACTCTCTCTCTTCTCTGTGCGGTTACACGGGAGAAC  
GACGAGAAAATCGCGCGCGCCACGATTGCAAGTGGATAGCCGTTATTTCGTTGGTTGGT  
TCGTAGTTTCATCGATCTTTCGAGGATCGTATAGAATAAGAATAAGAGAGTGGCGTGCAG  
TTTTTTTCGACCGCGTCTTTCGACCGTCTGCCTGTGTGCTCTACAGTGTTGACCAAACC  
CGCTAAAATTGGCTACTATTTCCACCGCACGATGTCCCTAGTTGACCGACACCATATTCG  
AACGATGCGCAGTCGCGCAAAATCGCTTCGAAAACGATAACGAGAAAGAGGTATATAT  
GCTTACTTTGTTTCAACTTGTTTCGTAGCTGTCACGTTTCGTACAGTTTTCTTCGCGTCGC  
GACACGCGTTGAACGTTTTTCTTTACGTAACGTACGTAAGAAACCACTTTTCTTACGG  
TAAGTCGTAGAGAATCGTATCGAGAGAATCTGCCGACTGACATTCTTTAGAAAACGTG  
CCAAGAACTTTTCGATGGACAACCTTCGTCTCGCGAAGTGTGACGCTCCTCAAGAGGAA  
AAAACCTTTCCGCGAAATTGAATAAAAGTATTGCGTAATTATCGGAAAGAGGCAAGCGA  
AATATTTCAACCGATATTTCCAGATACTTCGAGAAACCGTGTAAGCTTAGCCTTGTTATCGC  
TATTATTAAATTCCACGATCGCCGTTAATACGCTGTATGCGCGAACTTTTATCTCGTTTA  
TTTTTATCCCTTTCTTACTTTTCGAGCGGTTTGTACGGTAACCACCACTCTCGAACGT  
GCGGTACTCGAATTAATGTTTGCAAAACGACGATTTATTTTACGTGTAAGTACAAAGTG  
GACGCTTTTATTGCGACTAACACCGTGCAATCCAAAATAGCGACGTGTCCTCGTAAAA  
CGTGTTCAATCCTTTATGAAATTATAAAACAAACATTCGCCGAGACTGGAAACTGAGATA  
GTCGTTTTTCCAAACCTAGTTTTTGTTCCTTTTTGCTTCGGTTCGTTATAACTCGCGGC  
CGCAGGAAAGATCGATCGCACGTTTTTCCATGTGCGAGGCAGCGTGGCCGGTGTGAAA  
CGATGGTGCGTTTCGGCAAAGAGAACGGTAAAGCAACCGTTAGTAGGTGAAAGAGCAC  
GGGACCGGGGCACGATACGAAACACGATGAGCAACGAACCTCTCGAGCGAGCGAACG  
GGAGCGAATGACTCAGACGACTTGGGTATCCGGCGTGACATAGATCTACCTATGTAAAT  
GCTCCGCGACTATATTATTGTTCTACTCTTTCCACCACTCATTACGAGTAATAATTTATCC  
TCTACGATGCATGAAAATAATAAATAACGTTAAACACAATTTTTTTTTTCAGAATTAATAT  
AATAAATTTTAAATAATTGGAGAATTAGAAATTTGAAAAGAAATTTGTTTGTGAGATATA

TATATGTAAGATTCTTCAAAGAATTCTTTTTAAAATATCGATCATGAGCGGCGCATTATTT  
CGATCGGAGAGGACAACGACTGTCTAAAAATTGTAATTCATAGCTCGGTAGGAAGGA  
AAAATTCTTTCCCCGGGGTGTACGCCTTTACCGGCGACGTACGAACGTTTTGACCTGAA  
TAAAGTGACCGGATCCCGATCGATCGCGCAAGTATTTACGTGGCAGATACAATGATCG  
TGCACACACGTTTATTGATTTTTTACGCAAGTTAAAAATTAGAAAATAAATTATGCATCG  
TGAATGCGTGCATCAACCTAATTATTATATTTTCGAGAAATCGAGAATAATCTTTTCCAAT  
TAAATATATTTATTTATTATCGATAATGATAATTGATTGAAAGGAAAGAATCGAGCAAA  
AGTGGATCGAATTTTTTTTTCTCTTTCCGCCATTAATGTGTAACAAAAATAAATAAACGA  
CGTTCTAATAGATCAAAAAAAAAAAAAAAAAAGAAAAAAAAAATTCGAAAAACGGG  
GCACGGAAAGGGCCCCTTCTCAGAAAATCGTATGCCCGTCCGGCTTTGTAGGTGAATG  
TACCGTTTGTTTAATTCCGCTATACCACGCGATGGATTCTCCTTTAGCGTTACTCGGAGA  
AAATCAATACACGGACCATAAAAAATTAATCACCGCGATTATTTGCGAACACGCGCCAT  
CCGAGTGTTAATTGACGGGAATTTATCGTTTCTCTATATTTTTTCCCAATTATTCATTCAA  
TTTTGTTTCGGTAATTTTAAGAATAATTGTTAACGGTTAGAAAGTTTTATTTATTTTTTTT  
GTAAAATATATCAAGATTTATCGTACGTGTATATATATATATATATTATATCGCGTATGCGA  
CACGCACGCGATAAGAGACAAGCGTGCGTTTCACGAACTAAGTGTAAGTTTCGTAAAG  
AAGTACTTTCGTATCGATTGGAAGAGGTAAGCCGTCGTAAGTACCGTGAGACATCATG  
GCCGAATGAAAAGTATGTAATGAAAACGTGTACCTTTCTTGAACACTCTTAAAATTCTC  
TTATAAAATTGTATTCGATTGTTGTTACGATTTAAAAAGGAAGAATTTTCTAAAACGAG  
GATACGAAGAGATATCGAATCAAATTCGTGTATGTATTTGTTAATTCATCCGAATAAAT  
TGGTTTTGTCACTCGTCGAAGAAGCCATTCTTGAATTTTCGTGATGGCGAGATATCGATC  
GATGGCAGCACTCACCGGCGTGTATCCTCGAGATAAATTTAGATGCTGGTTTTTAGATC  
CGTGGCAACTTTGGCATTGGTTGCGAAAATTTCTCAGTCTTTCGAAGTAATAGCATTCA  
TTCGATTATAAACGCGCATGCAGTAAAGAAAAGAACTTAACCTAACCTAACAAACATT  
ACGTACACATATATATTATATATATATATGTACAAATACATATTTGGAATATGTAAATTGCA  
AAGATCGATAAGGGTATTTCAAAGAGAATGAAACAAAGAAGAAGAAAGGAAAGGTT  
CTTTTCTGGAAAGAAGTTGAAAAGTCTGGATGAAAACCGAGTATTTTACGCGTCATCGT  
AATCGTATAAATTCGCGCACGTGACGATTGACATAGTTTTTTAGTATATAATATCCATTT  
TGAAGACAGGAATGATCCATCGGGAATTGCAAATATTTGGAAGAATGTCTACGCGGAAT  
TCTTATGGCGGTCATTACCCGTTTATTACCATCGCGAAAACGTGACGCGTTTGAAAAT  
GTGTCGTGCGTTGAACTATCGTAATCGTCGATCACGTAGGAATTGGTTTTCCCGCAAT  
TACTTAGTAACGTATGTGTCTCTCTCTCTCTCCGCGCCATACAGAAAGCCTTCATTAC  
ACGGTGCCCGAATGTAAATAATTTCTAAAAGCGCTCATGCCGATAAGCGTATTACCATCT  
ACGCCTACGCATAGGGTGACTCATGCTCTCGATAGTCGGTACGCTCATATAACGCACGA  
TACGTATAAGTACATATGTGCATACGTGTAATCTCCACCCTTAGCTGGTTATATACTTCTG  
TCCATAAGTATACGTGAACGGCTTTCTTTATTAAGACGTTTATCTGAAAGAAAGAAACG  
TGAAATCGATAATGAATCCGCTAAATTTATACATATTTTATTTTTTTATCGCGTTTCGAG  
AATATATATTTTAATAACCGCGAGCAATTTATTTACTTACTTATCGATTATTGTTTGACACT  
TTGACACTACGTATAAACTTATCGTTTGAATTATTAATTTAAATCTTGTATACGTTTCGT  
TATCGAATGGTAAAAAGTTAAATTTCTCACTGTTCCCTTCCATTGCATCTGTGCTGCCCTC  
TTTGGTAAAAATATCCTAGTATTCTTTCACCTTTCTAAGATACGTTGAAATTTGAAGTTCC  
ACATGTCTTCTTGGATTTTTTTGGATAAAATTAAGTACCAAGTATTTTTGTAAAAGT  
TTAGAAACAGTGTAATTTATTTGTCCTGTAACGGATGACGCAACAGAAAGCGATAAAC  
GAACGGTTTTTACAGATGTAACGAATAGGACATAACCTAAAAGAAGAGCAAGAGTTCA

AACGAATGCAAATTTTTGGGGTGTGGAGATGGCGGCCACAGAGAGCACGATCCGTTT  
CAGCGGGCACACATTGGACAAGGCTACAAAGGCCAAG

>novel\_circ\_000948

GGGTGTGGAGATGGCGGCCACAGAGAGCACGATCCGTTTCAGCGGGCACACATTGG  
ACAAGGCTACAAAGGCCAAGGTAACCTTGGAGAATTACTACAGCAATTTGATAGCTCA  
GCATATCGAGCGAAAGCAGAGGCTTGCGAAATTGGAGGAATCGTTGAAAGACGAAGG  
GCTGTGGAGCAACAGAAGCAGGAGAAACGGTTGCAACATGCCCAGAAGGAGACGG  
AATTTCTTCGCTTGAAACGGTCCCGGCTCGGCGTCGAAGACTTCGAACCTCTCAAAGT  
TATCGGCAGAGGTGCTTTCTGGGGAG

>novel\_circ\_000950

TAAAAAAAAAAAAATAAAAGTGAATAGTGAATAAAGTCGAGCAACAAAGAGGGAAACG  
TTGATCATCAAGAAGAGATAATCGATGTAATAATCTAGTGGTTGATGTATATATCTTTTAT  
AGTAATTTTACATTAATTAATAAATAGAAATCTATAATTA

>novel\_circ\_000951

AAAAAAAAAAAAATAAAAGTGAATAGTGAATAAAGTCGAGCAACAAAGAGGGAAACG  
TTGATCATCAAGAAGAGATAATCGATGTAATAATCTAGTGGTTGATGTATATATCTTTTAT  
AGTAATTTTACATTAATTAATAAATAGAAATCTATAATTA

>novel\_circ\_000952

CGGTGCAGAGGGGACGAGTGCCGCCGTCGCAGCCGTCGCTACCAGGTCTGCCGGGCC  
AGTTCGCCCTGACGAACGGGGACGCGGTGGCGTGCGCGAGCCTGAACGGCCACTCAT  
ACCTCTCCTCGTACATAAGCCTGCTGCTCAGGGCGGAACCTTACCCGACCTCGCGCTAC  
GGCCAGTGCATGCAGCCCAACAACATCATGGGGATCGACAACATATGCGAGCTGGCCG  
CCCGGCTCCTATTCTCGGCGGTTCGAGTGGGCAAGGAACATCCCGTTCTTCCCCGACCT  
CCAGGTCACCGACCAGGTAGCCCTTCTCAGGCTAGTGTGGAGCGAGCTGTTCTGTCCTG  
AACGCGAGCCAGTGCTCGATGCCGCTCCACGTGGCGCCCCTCCTCGCCGCGGCCGGCC  
TCCACGCGTCCCCCATGGCCGCGGACCGCGTGGTCGCCCTTCATGGACCACATCAGGAT  
CTTCCAGGAGCAAGTGGAGAAGCTCAAGGCGCTGCACGTAGACTCGGCCGAGTACAG  
CTGCCTCAAGGCCATCGTCCTCTTCACCACAG

>novel\_circ\_000953

AGGTGCTCATTCAAATGGGCTGCGTTGGAATTTGCGGATCCGACGTTTATTATTAGTG  
AACGGTAGAATCGGTGATTTTGTAGTGCGCGAACCTATGATAATGGGCCACGAGTCTTC  
CGGAGTGGTGGTCAAACCTTGGAAGGATGTGAAAAATTTGAAGGTCGGCGACAGAGT  
GGCCATCGAACCTGGAGTATCCTGTAGATATTGCAAGTTTTGTAAGGAAGGACGTTACA  
ACTTGTGCAAAGAAATGGTATTTTTCGCTACTCCTCCAGTGCATGGTAGCCTGAGACGT  
TTCTACAAACATGCTGCTGATTTTGTCTTCAA

>novel\_circ\_000954

CGCCAAACAGCCCACTCCATCTTAGCAACAGGGCTCACGTTTTGCTCCTGCTGAATAG  
ACCTCAAGCCTCCCTCACGGATGCTGATCATGCTGTAGACTACGACCGGACTGGGGC

AAGGGTCATTACAGACGAGGGGTGGCTTTGTCCGCGCTAGGAAGACACGAGGAGGCA  
CTGTTTGTCTTTGCATTAGCGTCGCTATTGACAAGAATCCGCAAGCTGTGCGTCACGA  
ATTAATCAAG

>novel\_circ\_000955

CCCAGAAAATACTCGACCACACGAAGATTCGACGATTTTCCTGCCTTTCGGGATAATCG  
AATTGCAACGACGTTTGCACGTTTGAAGGATCGTGGATTTTCTATTTTCGCGAAATTA  
AAATTTGTGAGAAATTATTTCTGTGAATTAATAAAAAAAAAAAAAAAAAAAAAAAAAATAGAAA  
AGAAAAGTGAACAAATCGTGAAGGAACAATTGAAAAAAAAATGTGTTTCATACGTTGCC  
TCTTGATCTCGATGTTCAACTATTTTCCGATCATCACGTGAAAAATATCGATCTTCGAAG  
AACGATCATGTTTCGAGCATGATGCGCCGCCGCTTCGCTACGGAAGATGTTTCGATCGAA  
CGTTAGAATTTCTCCCGTCGAGAATTTGAACAATCATGAAAATTGACGGAACCTATTATA  
AAATTCGTCGAATAATTACGCGTTTTATCAAGCGGATCGAGGATCGAGAGGGGAAAAA  
AAAAAATATCTCACGAGGATTTTTTTTAAATAGAACGAAAGTTGAAAGTATTTTTTTT  
GGAAAAGTCCTTCGAGTGTATTTCTTTATTTTTTTTTTCTTCTTCTCTTCTAACTAAACG  
AGATCTAATCTAAGAGGATAATCGAGTGAGTTGTACTCGGTGTAAAAAAAAAAAAAAAAA  
AAAAAAATGGTGTTTCGTGCGCAAACCAGCGAACCGACCGGAAGTGTGACGAAGA  
GCCCCAGCATAGCGCATAGCACCAGCTCGTCCGGGATCTTGTCGAATTGGTACACGAA  
AATCACTACGAACGTGAAGAAGAGGCAACCGTTTAGCCCGAAATCTTTATTGAAGAAG  
GCGTTG

>novel\_circ\_000956

GAAC TTGGATCGCAACCATTACCGACGATCGTAACCGAAGATGCAGATACTTCGGGTC  
AAGCGTCTCAGGATCAAGGTCATAGGCCACGAGCAGGGACCTGGGGTTTCGATTCTAG  
AACTATTAGGAAGCCACCTCGGGCAGTGCTCCTGGTTCTGGAAAATCAACTCCTCTC  
CCGCAGCAAGTGAGCCTTCAAGTTCATCAAGTAAAAGCAAGAAAGTTTCTGGCACG  
CGATCTGGCTCCACCAGTCGTAGTAATAGCCGTAGTAATAGCGCAGAGCGCAGAAGAA  
GTGGTGGAAC TGTTGATGACACAGCCAGTCTACCAAAAAACCAGCACTCTTTGATGC  
GTTTAGACCAAGGAGTAAATCTGATGCTAGCAAACGAAAGCCCAGTATTATAGCGAATA  
TGAAGAGCGCTATGCAGCATTCTTTGCACAGAGGCTCACACGGAAGTTCAACGACAGA  
TATACGTACAGATAGGGATCATCATAGAGATGGCAAGGATCATAAGGAAGGTAAAGAAC  
CTATGGGACGTCTCTGAGCAGGTT CAGAAAGTAGCAGAAATCCTGTTAGTAAAGTTAT  
GGATCTTATTAGACACAGAAGTCACAGTACCCTTAGCGCAGATGACAAACGAAAAGCG

>novel\_circ\_000958

CAAAAAACGCGGACTCGTCGAGCGCCGAGGATGCCGTAAAGAGCAACAAGGACGAC  
GCGACGAAGACGGAAGAATCCGAGGACAGAAACGAAAGCGCCTCCTCGAAAGCATCT  
AGTCCATCTTCCTCCGAGAAATCGAGCTCGGAAAGGATCGATCAAAAATCGAATCCTA  
GCGGGTCGAGCGTCTCGGAGTCGAAGAGTCAAACCGCTACCTCCACGGTCGCCTCCG  
CGTCGTCGACAACGTCGACGGCACCGTTGACAACGTCGACGACCGCGTCGTCGACGG  
CTACCACGCTGACGACGACGTCGACGACGTCGACGACGGCTGCCACGCCGACGACCA  
CGATGACGTCGACGACGTCGACGACTACGGCGGGCAGGACCACTACCACTACGACGG  
CCACGACGATCCCCGCGACCAACCGCGTCGTCCAGGTTACGACGTCGACGGTCACCTC  
GCCAACGTCGAGCACCAAGCCCCCGTTGAGGAGGAGGCACACGACCGGGCCGGGGA

TGACTTTCCCCGCAACCGATCCGCCGACGTACTCCAACAGCATGACCTTCTCCAGGAC  
GAGTCCCCTCCCCAGCCCCCATTTTCGACAAAAGGTTCTTCGACAGCAGTTTGATAGAG  
ATGAAGAGTCAGGCGAGCAGCTCCAGCACCTCGACTACGACTCGACCGAAGAGGTG  
TGGGTTTCGACAGAGTGGACTTCGTCCAGGAGAGGAAGAGGAAG

>novel\_circ\_000959

ATACCTCGATGGAGAGTTCCGGTGGCGACAAGCAGAACGAATCGGACGAGTGCGATG  
TGACTGCCAATAATCAGCATCGTAAGGATAAAATGACGGGCCAGGTGGACAGTGAGGT  
GAAAATAAGTAAGGATTTGGGGGAGCAGGAGGCGTTGAAAAATTTGAAGAACTTGGA  
GAATATCAGTCAGAATGACGAGGCTTCGAATAAATTATCAAAGGCCGTGTCCCAAGAG  
GACGAGGATGACGAGGACGAGTGTAAGGGTCCGACGAGGACGAGCTCAAAGACGA  
GAAAACGGATGGGAAGAAGGACGAGGATACGTCGAGCAGCGCGACGTCGACGAGCA  
CCTCCGACGACGAGTCCGAGACGAGCTCGGACGATAAGACGGAAGCCTCCAAGGCCG  
AGCACGCGAAGGCGGCCGCGAGCGAGGCGAAGAAAGAGGATCAAGCGTCTAAGAAC  
GACGACACAACGGACGACAGTGACATCGAGGACGATTTAATTTTCGGCCATCAATTATA  
ACACCATCACCTCGTTGGCCGCCCTCAAGGATATGCTTCAATCCTCCGGCGAGGATTCG  
GACGGCGTGGACAGTTTCTTTTCATCATTACTTCCTATCCACGTGAACAGGTTACCGTC  
GAGGAATCAAACCCATAGCCCTTATCCGTGGGGCAGAAGATTGTCCGAGTGCAAGGAA  
GAGGACGAATACGAGAACGAAGATGCAAAAAACGCGGACTCGTCGAGCGCCGAGGAT  
GCCGTAAAGAGCAACAAGGACGACGCGACGAAGACGGAAGAATCCGAGGACAGAAA  
CGAAAGCGCCTCCTCGAAAGCATCTAGTCCATCTTCCTCCGAGAAATCGAGCTCGGAA  
AGGATCGATCAAAAATCGAATCCTAGCGGGTCGAGCGTCTCGGAGTCGAAGAGTCAA  
ACCGTACCTCCACGGTCGCCTCCGCGTCGTCGACAACGTCGACGGCACCGTTGACAA  
CGTCGACGACCGCGTCGTCGACGGCTACCACGCTGACGACGACGTCGACGACGTCGA  
CGACGGCTGCCACGCCGACGACCACGATGACGTCGACGACGTCGACGACTACGGCGG  
CGACGACCACTACCACTACGACGGCCACGACGATCCCCGCGACCACCGCGTCGTCCA  
GGTTCACGACGTCGACGGTCACCTCGCCAACGTCGAGCACCAAGCCCCCGTTGAGGA  
GGAGGCACACGACCGGGCCGGGGATGACTTTCCCCGCAACCGATCCGCCGACGTACT  
CCAACAGCATGACCTTCTCCAGGACGAGTCCCCTCCCCAGCCCCCATTTTCGACAAAAG  
GTTCTTCGACAGCAGTTTGATAGAGATGAAGAGTCAGGCGAGCAGCTCCAGCACCTC  
GACTACGACTCGACCGAAGAGGTGTGGGTTTCGACAGAGTGGACTTCGTCCAGGAGAGG  
AAGAGGAAG

>novel\_circ\_000960

ATACCTCGATGGAGAGTTCCGGTGGCGACAAGCAGAACGAATCGGACGAGTGCGATG  
TGACTGCCAATAATCAGCATCGTAAGGATAAAATGACGGGCCAGGTGGACAGTGAGGT  
GAAAATAAGTAAGGATTTGGGGGAGCAGGAGGCGTTGAAAAATTTGAAGAACTTGGA  
GAATATCAGTCAGAATGACGAGGCTTCGAATAAATTATCAAAGGCCGTGTCCCAAGAG  
GACGAGGATGACGAGGACGAGTGTAAGGGTCCGACGAGGACGAGCTCAAAGACGA  
GAAAACGGATGGGAAGAAGGACGAGGATACGTCGAGCAGCGCGACGTCGACGAGCA  
CCTCCGACGACGAGTCCGAGACGAGCTCGGACGATAAGACGGAAGCCTCCAAGGCCG  
AGCACGCGAAGGCGGCCGCGAGCGAGGCGAAGAAAGAGGATCAAGCGTCTAAGAAC  
GACGACACAACGGACGACAGTGACATCGAGGACGATTTAATTTTCGGCCATCAATTATA  
ACACCATCACCTCGTTGGCCGCCCTCAAGGATATGCTTCAATCCTCCGGCGAGGATTCG

GACGGCGTGGACAGTTTCTTTTCATCATTACTTCCTATCCCACGTGAACAGGTTACCGTC  
GAGGAATCAAACCCATAGCCCTTATCCGTGGGGCAGAAGATTGTCCGAGTGCAAGGAA  
GAGGACGAATACGAGAACGAAGATG

>novel\_circ\_000961

GATCAGATTTTCATGTGTCTGGACAAAATTACGGCACCCAACCAGGGGGGCCAGGTGGG  
CGGGGGAGGGGGTAGTGTAGGAGTACCTGGGGGCAGAGGACCTCCACCACTCGGCGG  
CTTACAATCTATTGGACAGTCAGCAGCAGGAATTCCACCAGGAGGTCCTGCTGGAGGA  
CAAGCACCACCACAAACCCCGGCTCCCGGGGTACAGTCACAACCGCCGCAAGGTCCG  
GCTCCCACCACTACTCCCCCGGTACACACACCGTCACCTCAGGAAATGGGAAAACAG  
GCCCATTTACAACCTCAACCACAACCTCTTTCACAAGTATATGGGCCAACGCAAAACAA  
GGCCGACGTCACAAGGTTACTATCAAGGACCTAGACCACAACAACCTCGAGGCATTAG  
TCACAGAGGGGGACAAGGAGGTACAGGTGCACAAGTTGTAGGAATGTCAGGAGTTGG  
TGGAGGTGGAGGCCAACCAACTGCGATTTATCACCCAGGTGGTTTGCCAGTTCAAAC  
GGAGCAATATATCCAGTTCCTAATCTTCATCCTGGCCACATCAACAATCTTTATACGCA  
ATGAACAATCAAATGCCCTTCAGGTAGTATTCGGTGGTCCTCCTCAAAGGCATCAAAC  
GCATCAAAATCAGTCTTATTTCCCACCTTTTCAACATTTCGGCTATTCTAACGCAAAATAT  
GTTTGGATATGGTGCACCTGCACCAACTCCTCAACCTTATTATTGGCCTACTGGTCAAC  
CACCGAATACACCACTAATAAGTAGGGCAGGTGCAAGCGCTGTTACTGGTGGGGCACA  
ACATGTTGCAGGCCCCGCTGGCCGGTGCCCAAGGAGCCCCAGTAGTACCACAAGGTAC  
ACTTCAACAGCCTACACAACAAGCGCAACCTTTACCTCCAATGGGTATATCTCTTTCTC  
AGACTG

>novel\_circ\_000962

AAATCTTCCAAAAGCGATTTGCATATCGTTACCATTGGTAACATAATTTATGTTCTGGC  
GAATATTGCTTACTTTGTGGTGTAAACGCAAGATGAAATTCTGGCATCGAATGCTGTGC  
CTGTCACTTTCAGCGATAAGCTGTTAGGCGTGATGTCTTGGATAATGCCAGTATTCGTG  
GCTTGTTCAACCTTCGGGGCGTTGAACGGAGCAATTTTCGCATCATCACGATTGTTTTT  
CGTAGGAGCTCGTAATGGACATTTGCCCCGCCGCCATTGCCCTTATTAATGTTCAAACTT  
AACACCCACGCCTTCGCTTATCTTTCTT

>novel\_circ\_000964

ATATACGATTGCAGCTGAACGAACAGCTGAGATGTCTCGACATCCGGATGGAGGCCCCA  
AGTCGCCATCGTGGCGGAGCTTCAGGATTTTTTTTCGAAAGAGAGCCGAGCTCGAGCTC  
GATTACAGCAAGTCTCTTGACAAGTTGGCCAGAAGCATAACAGCTCAGACACAAGGAG  
CAAAAGCAAAAGCGAGAACAGTGGCCCCCTATTCTCGAGCTACGCTTGCTGGCAACAA  
CTCATCAACGAGACTAAATCCTTAAGCAGAGATCATGCAGCTTTGTCAGAAGTATATAG  
CACACACCTCGTTGGTCGTCTTAATCAAGTGATGGAAGATGTTCAACGGATATACAAAC  
GTTGCCGTGAAATAGGTTATGAGACGCACGAGGAAATTCTTCGAGTATTGGATGAGCT  
GCATACCACGATGAAAACGTATCAGACATACCAGACCGGGTCACGGCAAGCGGAAAC  
GAAACTTCGCGTCGCGGAACAGCAGCGTAGCAAGCTCGAGGTAGCGAATGCTCCTCC  
GGAGAAACTCGCGCGCAGCAAGAAATACAAACTCATGGAAAAGGAAGTGAACAAGA  
GGAAAGTTAAATATCAAGAGGCGAAGCTGAAAGCGTTGAAAGCAAGAAACGAGTACA  
TTTTATGTCTTGAAGCATCCAATACGACAATACATAAATATTTTGTGGACGATCTTTCCG



ATCTTATTGATTGTATGGATTTCGGTTTCCATAATTGTATCGCCAGAGCTTTGCTGATGCA  
TTGTAGCGCAGAGGAAGGTAGACAACGTTCACTACAATCTGGTGCTGAACAATTGGCT  
GCTTGTGTTGGTGCTCTAGACTCGAGAGCGGATAAACAAAGATTTCTGGAATCTCATCA  
TGCTGCTTTCATGATTCCTAAGAAGTTCGAATTCGAAGGACAACGAGGGGATGAGGTA  
CTCGAAACTCCCGAACCAGAACTTCAAAAATTGTTGCATGCTGAAATGGAGCAACGAT  
TGGCTCAATTACAACAAAGATTAACTTCTTTGAGAACAGAATCTGAAGAAGTTTGGA  
AACTTTGGAAACAGCAGAAGCTAGTCTATTGGAAATGTAACTGCAAAAGACTATGAT  
TGTTCAAGATATTTTGGAGAGAATGCTGTTCCCACTTCCAGACCACCAGAAACCGTGC  
AAATCAAGCTTAGAGCCGACAGACAGGAACTGAAGAATTCTACCTCACAAAATTCA  
GGGAATATCTTCTTGGAACCTCAAGAATAGCTAGGTTAGATGCAAAGCAAGAATACATT  
CGGCAGAGCCTATTGGATGGTTCTACTGCTAGCCCAAATCCATCAATATCAACAACGAA  
ACAAAAACAAGCTCGGAGAAAACGAATTGGTAGATTGCAAATGAATGGTCAACCAAA  
ATTATTTGGTGGCTCATTAGAAGAATATTAGAAAGCACAAATCAAGAAATACCTCTAAT  
CATGAAAAGCTGTATCAGAGTGATCAATTTGTATGGTCTTCATCATCAAGGTATTTTCCG  
AGTCTCTGGCTCCCAAGTAGAAATTAATAATTTCCGAGAATGGTTTGAGAGGGGAGAA  
GATCCATTGGCTGATGTCACAGACGCATCAGATATAAACAGTGTGCTGGTGTATTGAA  
GCTCTATTTGAGAGAATTGAGAGAACCCTATTTCTTATTATTTTGAACATTTAATG  
GAACTAGCGCAATTAGAATCAAAGCAAGAATTCGTTAACAAGATGAAAGAATTGATTT  
CCAGTCTTCCAAGACCAGTTGTCATAGTAATGCGATACCTGTTTGCTTTTCTCAATCATC  
TCTCAGAATTTTCGGATGAAAATATGATGGATCCATATAATTTGGCAATTTGCTTTGGTC  
CCACATTAGTACCGGTTCCAGAAGATAAGGATCAAGTACAATATCAAAATCAAGTAAAT  
GAACTTATCAAGAACATTATCACATTCTGCGAAGAAATATTTCCAGAAGACATTGGAGG  
TACTCAATATGAAAAATACATCAGTAGAGAACCTGATGACGTAGATGTTGGAGACTCGC  
CGACTGATCAAGCCCAAGAAGATATGGATTCTGAAGTGTATCCATCTGAGGATGAATCA  
GAAAACCTTGAAGCCACAGCGCAATTCGATTTCAATGCAAGATCCGAAAGAGAGTTAA  
GCTTCAAAAAGGGAGATACCTTGACTCTATACACACAAGTCAGTAATGACTGGTGGCG  
AGGTGCCTTGGCCGGTAGAGAGGGGCTTATTCCCGATAAATATATAATGATCAAGATAA  
AGGACGAAGAACGTGAAAAGGAACTCCTGAAATCGTCCAGCGAAGAATCAATGCGAA  
GAAGGACTTCTAGCTCTGCCGATAGTGTTCTTTCAAGTAACAATTCACCACTGATGGGA  
CCATCCGGAAATCCAAATACTTGGCCTCCTGGTACTACATCTGATATGCAGTCTACCACG  
ATCACAACAGAGAATAGCAGTAACAGCGGTGTTATCCCAGCAGTCGTGACAAATGTCC  
CTTGCATCTCATCAACACAACCAATCATCAGTCGAGAG

>novel\_circ\_000966

GTGGGCTATCGTCACCCCTGCAGCGCGCCTCTACCGCCTCGCCCCACGGGGGTGTCGG  
GGGTGTGCCGCCTTCGTCCCACGTGTCCTCCCAGCAACCACCGCCTCCACCCCCGGCA  
GCAGTCTCCCTCCCCCGCGCTCCACACCCACGCCCTCCTCGGCCACCTCGACCACGT  
CCAGCCTCCTCTTCCCCCTCCCCTGCAAAACGTGAGACGTTGCGGCTCGTTCCTCGG  
CGAAGAGATCGTCGCCAACTGGAGGCGGACGTTGGAGAGGTCCATCATGAATCAACA  
ACAGCAACAACAGCAACAGCAACAACAATCGAATCCGTTGAGTCAATTGTCGCAACA  
ACAGCAACAACAGCCGCTGATCGGCCTACACCCGCCACCACCACCACAGCCGC  
GAGCAGCGGCCTCAATCATCTTCCGTGCCCCACCACCGACCCCTCGTCCAACAGCTCC  
AACCCCCCGCCAAATCGAACACCCCCCTGGGGACGACCCCGCTCAGTTGCCTGGAC  
GCGGAGAAGGCGCCGACCCCGGTCTCGGGCCACGAGACCCCGGCGCCCCCACGCCA

TCCTCAACGACGGCGTTAACGTCCCCGCCGAGCTTTCAACCGCCGACCTCCGTCGTCG  
AGACCGCCGTCAACGGCGCAACCCCTACGCCCCGCCGCCCTTGCCCCGGCGCCGCCCC  
CCAAGAGCCCGCCCGACCAGGAATCTTGCCACAACAATAATAACAACAACAACA  
GTCATCATCTGGCCAACAATAACAACAACAACAACAACAACAACAACAATAATAA  
TAATAGTATAGGGGGGTTGAGCGTGCTGGACACGCTGAAGAGCCCGTTCCGGTTCGAC  
GAGAGGACGCATCCGTTTCGATTCAGCGACGAGTTTCGGGGCGACGGGTATGCCGGTGA  
GATTGGGCGAGTCCCTGATCCCGAAGGGGGACCCGATGGAGGCGAGGCTGCAGGACA  
TGCTGCGTTACAACATGGACAAGTACGCGTCCCAGAACCTGGACACGTTGCACATAGC  
GAGGAAGGTGAGGGAGCTGTTGTCGATACACAACATCGGGCAGAGGTTGTTCCGCAA  
GTATATACTGGGGCTGAGCCAGGGGACGGTGAGCGAGTTGCTGAGCAAACCGAAGCC  
GTGGGACAAATTGACGGAGAAGGGGCGAGACAGCTACAGGAAGATGCACGGGTGGG  
CGTGCGACGAAAACGCTGTAATGCTGCTTAAATCTCTGATACCGAAGAAAG

>novel\_circ\_000967

ATCGGTCAACTGGTGGAGGAGGTGTCCAGGTTACAGCAGAGCCTGCAGCGTCTCCAA  
GAGACGAGCGCACAGGCGACCGCTCGGCTCGAGGAGGAACTGGAGGCGCGCAGACA  
GCACATCAACAGACTGGAGAGCAAACCTGGAGCGGCAGAGGGACTACGACGACCTGA  
AGCGCGAGATAAACGCGCTAAGGTCGGTTCGATCTCTCCAGATACCAACCGGCGAACC  
TGGCAAGAGCTTGGAGCACCTTCTAATGGAACGCTCGAAGGCGCTTCAACAGACCGA  
GAGCTTGAAGCCATCCAACACCCCGGACGCGCTCGGTGGGCTATCGTCACCCCTGCAG  
CGCGCCTCTACCGCCTCGCCCCACGGGGGTGTGCGGGGTGTGCCGCCTTCGTCCACG  
TGTCTCCAGCAACCACCGCCTCCACCCCGGCAGCAGTCTCCCTCCCCCGCGCTC  
CACCCACGCCCCTCTCGGCCACCTCGACCACGTCCAGCCTCCTCTTCCCCCTCCC  
CTGCAAAACGTCGAGACGTTTCGGCTCGTTCCTCGGCGAAGAGATCGTCGCCAACTGG  
AGGCGGACGTTGGAGAGGTCCATCATGAATCAACAACAGCAACAACAGCAACAGCAA  
CAACAATCGAATCCGTTGAGTCAATTGTCGCAACAACAGCAACAACAGCCGCTGATCG  
GCCTACACCCGCCACCAACCACCAACAGCCGCGAGCAGCGGCCTCAATCATCTTCC  
GTCGCCACCAACCGACCCCTCGTCCAACAGCTCCAACACCCCGCCAAATCGAACACC  
CCCCTGGGGACGACCCCGCTCAGTTGCCTGGACGCGGAGAAGGCGCCGACCCCGGTC  
TCGGGCCACGAGACCCCGGCGCCCCCACGCCATCTCAACGACGGCGTTAACGTCCC  
CGCCGAGCTTTCAACCGCCGACCTCCGTCGTCGAGACCGCCGTCAACGGCGCAACCC  
TCACGCCCCGCCGCCCTTGCCCCGGCGCCGCCCCCAAGAGCCCGCCCGACCAGGAAT  
CTTGCCACAACAATAATAACAACAACAACAACAGTCATCATCTGGCCAACAATAACA  
CAACAACAACAACAACAACAACAACAATAATAATAATAGTATAGGGGGGTTGAGCGTG  
CTGGACACGCTGAAGAGCCCGTTCCGGTTCGACGAGAGGACGCATCCGTTTCGATTCA  
GCGACGAGTTTCGGGGCGACGGGTATGCCGGTGAGATTGGGCGAGTCCCTGATCCCGA  
AGGGGGACCCGATGGAGGCGAGGCTGCAGGACATGCTGCGTTACAACATGGACAAGT  
ACGCGTCCCAGAACCTGGACACGTTGCACATAGCGAGGAAGGTGAGGGAGCTGTTGT  
CGATACACAACATCGGGCAGAGGTTGTTCCGCAAGTATATACTGGGGCTGAGCCAGGG  
GACGGTGAGCGAGTTGCTGAGCAAACCGAAGCCGTGGGACAAATTGACGGAGAAGG  
GGCGAGACAGCTACAGGAAGATGCACGGGTGGGCGTGCGACGAAAACGCTGTAATGC  
TGCTTAAATCTCTGATACCGAAGAAAG

>novel\_circ\_000968

ATCGGTCAACTGGTGGAGGAGGTGTCCAGGTTACAGCAGAGCCTGCAGCGTCTCCAA  
GAGACGAGCGCACAGGCGACCGCTCGGCTCGAGGAGGAACTGGAGGCGCGCAGACA  
GCACATCAACAGACTGGAGAGCAAACCTGGAGCGGCAGAGGGACTACGACGACCTGA  
AGCGCGAGATAAACGCGCTAAGGTCGGTCGATCTCTCCCAGATACCAACCGGCGAACC  
TGGCAAGAGCTTGGAGCACCTTCTAATGGAACGCTCGAAGGCGCTTCAACAGACCGA  
GAGCTTGAAGCCATCCAACACCCCGGACGCGCTCG

>novel\_circ\_000969

GTGAGTGTACGATGCACCGATTCCGGGACGGGAAATTATCGAATTAATTTACGAGGAG  
GAGGAGGGATTAATCCCGCAATTATCTCTCTCTCTCTCAACGTGGAGGAGGAAAGA  
AAGGGAAAGAGAGAGGCGAATTCGAGGAGGGGGTTCGAGTTAACGCACTAATCAACC  
GTTCTGAAGGCGCTCTGGATGTATCCACGATGGAGGAGGAGGTTTCGGTTATGATCCGC  
GGATGGAGGAGGTGGACACGGGGTGGGAGAACAGGGAAGGAAGAAGGCGAAAAGG  
GAACGAGGAGGGGGAGAGGAGCGATTCTCGACGTTGGCGGAGAATCGAATGACGAC  
GTTATCGGTCAACTGGTGGAGGAGGTGTCCAGGTTACAGCAGAGCCTGCAGCGTCTCC  
AAGAGACGAGCGCACAGGCGACCGCTCGGCTCGAGGAGGAACTGGAGGCGCGCAGA  
CAGCACATCAACAGACTGGAGAGCAAACCTGGAGCGGCAGAGGGACTACGACGACCT  
GAAGCGCGAGATAAACGCGCTAAGGTCGGTCGATCTCTCCCAGATACCAACCGGCGAA  
CCTGGCAAGAGCTTGGAGCACCTTCTAATGGAACGCTCGAAGGCGCTTCAACAGACC  
GAGAGCTTGAAGCCATCCAACACCCCGGACGCGCTCG

>novel\_circ\_000970

GCCAGCAAGGTCAGCAAGGCGAACAGGAGTTGGCAACGAAGATGTTGCAGATCCAAA  
GTAAAAGATTCTATCTTGATGTAAAACAGAACAGACGTGGGAGATTTATCAAAGTAGCC  
GAGATCGGCGCCGATGGAAGGAGAAGCCAAATCTACCTGGCACTCAGCACAGCATCC  
GAGTTTCGGAATTACCTTTCAACGTTTAGTGACTTTTATGCATCTTTAGGTCCACCAAAC  
TCGGAGAACGTGCCAGATGATGGGAAATTAATAATCAGAAGTGATGACAAAGGATAAC  
AGGCGGTATTACTTGGACCTCAAGGAAAATACTCGCGGCCGTTTCCTGCGGGTGAGTC  
ACCCTGTGTCGCAGACGATAACACGAGGAGGACCCAGGACGCAGATCGCGATACCAG  
CACAGGGTATGATCGAGTTCCTGTACGCGTTGACAGACCTCCTCGAAGAATACGGTAC  
GGACGATGGTGGTTTCAAGGGTGATTTACCAGAGGGACGATACATGCGCGTGGATAGC  
AAGAATTTCTATTTTGATATCGGCCAGAATAACCGTGGTATCTACATGAGAATTTCTGAG

>novel\_circ\_000971

CTCCACCCGGCGAAGAGGACGAAGAAGAAGGATTACGGAACGGATTCTTGAAAGGGC  
AGGAGAATGACACGAACACGCACAGCTTTACTCGGCAGAGCGGATACAAGCCGCGTA  
GAACCGGAAGTAGCGATGGTGGCGCGTACGCCGGCGCTACGACACGGCACAAGAACG  
ACACAACCGGTTACCGTCCCAGCCCAAGATTATCTTTAACGAGGACGAATACACGAG  
GATCACGACACCCCGCCAGGATATGCTGTTCAAAAAGGGTTATCTGTCTGAGGAAGAAA  
CCCTGGAGCGGGAACGCCAACACCAGCGCGACTTCCTCGACCACCGAGAGCCAATCG  
GCGTCTCATTCCACCGCAGGTAGAGGTATAGATGGTAGCGAAACGACTGAGGATCAAC  
AGTTGTTGGACAGGGACTGCGGTACCGGCGAATATCCACCAGTGATGGATTCCAACGC  
CCAACCTGGGCTATGGGACGTTTTATGACCACATGGGTGGTTACTATTACGAATATCCTGT  
GATGTTGGTTGGTCCAGCGCCGATGCAATCTCAAGTTGCACCGAGTGTTTTGGCGGCC

GTGCCTTGTGCACCTGTGCCTCTTAGGCCCATAGAATGGATTAATCCAACCTTACGTGCC  
CAAACCTGCCTAATCAACCATACTGTATAATGAATTACGAGAACAATCAAAGTATGGAAA  
ATACGGTGGTAATGGAAGAGCAAGAAAATACGGTTCTGCCGACGGAGAATTCAAATGG  
AATCAGTAACGAGAGCGGTACAGGTAGCACCAGTTGCAGCGGTAGCATGGCCGGGGA  
GACGGAAGAGCAGCCCATAGAGTTCACCAACGCGAAGGAGGAACAGCAAGCGGACG  
AGCAGATGGAGGAACAAATGGAAGAGCAAATGGAGGAACAATACGGGGATGAGCAA  
CAAGCGGAGGAGCAACCCTTGGAGAACGGTGGCCCCTATTTTGAACCAATGTTGATGC  
AGCAACCGGTACACGTATCTCACGTGATACCAGCGATTCTCAGCCTTACATGTATCCC  
GGCCATTACATGTTTGGTCCTCCTTTGATCAACGTGAATG

>novel\_circ\_000973

GAGACGGTATTCAACAAGTCGTGATGCATTGGAGGTTTCGGCGGTCCTTATCCAAAAAC  
CGACCAGAAATCAGTGTTACAAAAGCAATTTGTGTGACAAAGCATAAAAGTGCAAAAT  
TATATTTTAAGACATATTCAGAAGCTTTCTTATCAGTGGACTATATATCCTTGAAGAAA  
GTAGACATTCTTAGTGACACTGAAAGTACAAGTGAAAAATATAAAAATTGGGGGGGCT  
GTTTGACCGATGGACAAACGGAAGATGATGCCCAAACGCCCTCGAATGGATAACCTGA  
GGGGTCCTATTGCAAATGGACCCATTACAGACACGACCATTAGTAGCTTTGTTAGATGGT  
CGAGATTGCTCTATAGAAATGCCTATTCTTAAAGATGTTGCAACAGTAGCCTTCTGTGAT  
GCACAATCTACATCAGAAATTCATGAAAAGGTATTAAATGAAGCAGTAGGTGCATTGAT  
GTGGCACACCATAATTTTGACAAAGGAAGATCTCGAAAAATTTAAACATTACGGATTA  
TTGTGAGAATTGGATCTGGAGTAGATAATATAGATGTCAAAGCAGCAGGTGAACTCGG  
CATCGCTGTGTGCAATGTGCCTGGATATGGTGTGGAAGAAGTAGCTGATACTACTCTTT  
GTCTCATTCTAAATTTATATCGACGTACATATTGGTTGGCAAACATGGTGCCTGAAGGGA  
AAAAATTCACAGGTCCAGAACAGGTTAGAGAAGCTGCAACAGGATGTGCAAGGATAC  
GGGGTGACACACTTGGAATAGTTGGATTAGGTAGGATTGGTTCTGCAGTTGCCCTGCGT  
GCCAAAGCTTTTGGTTTCACCGTGATCTTCTATGATCCTTATTTACCAGATGGAATTGAA  
AAATCTCTTGGTCTTAACAGGGTTTACACATTACAGGATTTGCTATTCCAGTCAGATTGT  
GTATCCTTGCATTGTACCTTGAACGAGCACAATCATCATTTAATTAATGAATTCACTATC  
AAACAGATGAGACCTGGCGCCTTTTTAGTTAATACAGCAAGAGGTGGTCTGGTTGATG  
ATGATGCCTTGGCTGCGGCATTGAAACAAGGCAGAATTCGTGCAGCAGCACTAGATGT  
ACATGAAAATGAGCCATACAATGTTTTTCAGGGTCAAGTGTGCTCACAGTGTCCATTAAAAG  
ACGCACCCAATCTATTGTGTACACCACACGCAGCATTTTACAGCGACGCAAGCTGCAC  
CGAACTTCGTGAGATGGCAGCCAGTGAAATACGAAGAGCTATCGTTGGTCGCATACCT  
GACTGCTTACGAAACTGTGTGAACAAGGAATACTTCCTTTCTTCGACCGG

>novel\_circ\_000975

AACGAATGACGTCGATATATAGAAATACAATCAAGAGAAAAGCCATAGGGAGCCTGCA  
AGACGTGGATCTTATTCTAATATAATTTAAATTAATAAATGTCTTGCGTGGGGATGTCCTG  
TTACGAAGATGGCTTCCGGTTGGCTGGTCCCGCATCGGAATGCTCTCTCAGGAGCAAA  
GCTCGCATCGATGCCCTTTTCGAGGACTCGAGATCGATTTACGGATCCAACATTGGCGG  
ATGGTACGGTGGGGTATCGACTATGAACTCGAATTACGTGGAGAACGTGGGGGCGGAA  
GAGCAAAGGCGGGTGAACAGCGCCGTGCAAGCGCGGATCGAAGCGATGTTGCGCTCG  
GTGGAGGCCGAAAGCGGAACACCCGAAGAATGCGTCGCTGCAATTTTACCG

>novel\_circ\_000976

GTACGTTATCACAACGTTGTGCGGGGAATCCTGTCCGTGCCCCGACGTTGTGATCGCCC  
TGCTTTTCTGGATCGGGTACACGAATTCGGCGCTGAACCCGTTGATCTACGCGTACTTC  
AACCGCGACTTCCGAGAAGCTTTCAAGAATACTCTGCAGTGCGCGTTCTGCTCGCTCT  
GCAGACGAGAGCCGTCCGATCTCGAGGCGCTCGATTTCGTCGGCCGTCCCTAAGGTA  
CGATCTGGTCTGACACGTCGAG

>novel\_circ\_000978

CTGGTGGCCTAATGGCAGGTTCCGTGGCTACCTTGGCGATCCTATGGGTCTCTCTACAA  
ACCATGGGATTCCCTTGAAATACGCATACGATCGGTGCCTATAAATTGCCAATTCCTTG  
CAGAACTATCTTGCCAGTTATACAGGTATCCTTTAGGTTTGCCGATGACAAACTACCC  
TTACGAGGGCGGCGTCGTAGACACGGGTCTACCCATAATCGGCGTTACCCTCACATTG  
ACGAGGCGGTCTTGAACAACCTCGATCAGTTTCGCGCAAAGCTTGGTCGATCGTATGAG  
CACCTCGAAAGGAATATCGCGAATGCTGGCGTCGAATTGATGGCTCACACGCCGGCT  
GGAAAACAATTCCTTGATTCATATCCTTCCGAGGATGCTTTCGAGAGAGGCCTCGACGC  
CATAGTGGCGATGAAAGCTTCGTCTATCTCCTTCATCAGAGCTGTACAGATTCGGGC  
TGGACAAAGACGATTGCGCTCGTTTCATATCGACCTTGTCGCTGGAGGGGACTCCGTT  
GAACTCGGCCTGTCCGTCATCGCGGCACAAGGGGTGCAATTCTCTGGCCAAGTACCGA  
AATATCGACGGCAGTTGCAATAATGTCCAAAATCCAAGCTGGGGTAGTGCGATGACCG  
CGTACACCAGAATTCTCTTCCCCCAGTATTTGACG

>novel\_circ\_000979

CTGGTGGCCTAATGGCAGGTTCCGTGGCTACCTTGGCGATCCTATGGGTCTCTCTACAA  
ACCATGGGATTCCCTTGAAATACGCATACGATCGGTGCCTATAAATTGCCAATTCCTTG  
CAGAACTATCTTGCCAGTTATACAGGTATCCTTTAGGTTTGCCGATGACAAACTACCC  
TTACGAGGGCGGCGTCGTAGACACGGGTCTACCCATAATCGGCGTTACCCTCACATTG  
ACGAGGCGGTCTTGAACAACCTCGATCAGTTTCGCGCAAAGCTTGGTCGATCGTATGAG  
CACCTCGAAAGGAATATCGCGAATGCTGGCGTCGAATTGATGGCTCACACGCCGGCT  
GGAAAACAATTCCTTGATTCATATCCTTCCGAGGATGCTTTCGAGAGAGGCCTCGACGC  
CATAGTGGCGATGAAAGCTTCGTCTATCTCCTTCATCAGAGCTGTACAG

>novel\_circ\_000981

AGGCAGTGATAAGAAGATTACTGTGACCACAGTAATCAACTAAATGTTTCAGACTTCCA  
AAGGAATAAAAATGCTGGAATTGCTCCAATGGTCATAGCTACACCAATGGGAAGTTCAT  
CACCTCCCAACTTCTGTAAATGTCTAAATATAAAAATACGAATAATTTTATTGTATAAA  
TATATTTCTTATTATAGCTTAAACAACAACCTTAAGTATTTTAAATTAATTCTATCAT  
TAATCCAATAATTTCAAGTCAATTTTATTGTTCTCATGATAACGTAAAATAATTAATAAAA  
AATCTTACAAAGGCAAATACTATCCATGGCGCTCCAAAAAGTTCCCATAACGATGAGT  
ACAATTACAAGAGCGGCGGTTTCACTACCATATCTTTTGATAGCGCTCATGGGAAGTGC  
CAGCATGCCGCTTCTGGTATGCCACCACCATTCGGGTGGACTAAGTGGCATGCCGTTGG  
CACAAAAAGCTACAAGAGCTGCCAAAAGCATCATTACAGCATGTATACCAATTGGCAG  
ATAGTAGAAAGAATTCAAATTTT

>novel\_circ\_000982

TAGCTTTTCCTGACGTCTTTTATTACATCTTATCACAAAGGCTTTAATTAAGATGGTATAT  
TTTTTTTATCTCCTTTGTACTTACATTCTTTACATACTGCACAAATAAAAACTCCTTCTAG  
AATATCTTTTCATAAGTCGACTGGTTAAGTAGTCAAGTCCAAAATGAATCGTGTATGTGT  
CACGATTTATTATTGTAAATATGTTATTTACACATATATCTAAGCTTCAAAGCTTTATATT  
TTTCTTTTTTCGCATTTATGGAGAGGGTTTGGATTTTTTGGCTATGGTATGTCTTCATTTT  
ACATGTAACAAATACAATAGATAACTAATGTAGCAGGTCATAATTAAGAACATGATGATA  
GACATATAACGTAACATGTAAAGACTGGATTATCCTATCTGCCCTCTGAACGTTTTTTC  
AACCGTTCTTTTAATCTCGTTATACAATATATATGTAAAGCTGTATATCTGTGTTGTGTGT  
CTATAATATTTACTTAAATGTTAACTTCTTACAGACCGGTTACATCTTTGAAAGGAAAAA  
GATCTATATATATTTCTATATAAGCCAACTTAGCATATCTAAGTAGATATTTTAAATATCA  
G

>novel\_circ\_000983

AGAAACGAACGGTTCGAAAGAAGATCTTTTGGTTCGTGATTATAGTGATAGAGAAAGGG  
AACGAGATCGAGATAGAGCAACTGAACGGAATGATCGTAATCATCAATCGGAACGTGA  
TAAAGATCGCGGTCGTGAACGAAGATTTAGTAATGATC

>novel\_circ\_000984

CAGGTCTGGTGTAACCTGAAAGCAAAGAGGAGCAAAACGTGGCGGATTCGGTGACCCC  
TCGGCTGTGACCAGAGGCGCACAGAGGAATTAGGGCAAGGAAATGCGTGAATATAAA  
ATAGTAGTGTGGGCAGTGGAGGTGTAGGCAAGTCCGCCCTCACTGTCCAGTTCGTGC  
AAGGAATCTTCGTGGAGAAGTACGATCCGACGATCGAGGACAGTTACCGCAAACAGG  
TCGAGGTCGACGGTCAACAATGTATGTTAGAAATCCTAGACACAGCCGGAACGGAACA  
ATTCACAGCTATGAGGGACCTTTACATGAAAAATGGGCAGGGATTTGTGTTAGTATATT  
CGATAACGGCGCAATCGACGTTCAACGACTTGCAAGATCTCAGGGAGCAGATTCTACG  
GGTGAAGGACACAGATGACGTGCCTATGGTGCTGGTGGGCAACAAGTGTGACTTGGA  
AGATGAGAGGGTAGTGGGCAAAGACCAGGGCGTCAATCTTGCCCGGCAATTTAATTGC  
GCATTCATGGAGACTTCTGCCAAAGCCAAAATTAATGTTAACGATATTTTCTATGACCTG  
GTACGACAAATAAACAAAAAATCGCCAGAGAAGAAGATGAAGCAGAAAAAGAAATC  
GCTGTGCCTACTTCTGTAAG

>novel\_circ\_000985

GTCTGGTGTAACCTGAAAGCAAAGAGGAGCAAAACGTGGCGGATTCGGTGACCCCCTCG  
GCTGTGACCAGAGGCGCACAGAGGAATTAGGGCAAGGAAATGCGTGAATATAAAATA  
GTAGTGTGGGCAGTGGAGGTGTAGGCAAGTCCGCCCTCACTGTCCAGTTCGTGCAAG  
GAATCTTCGTGGAGAAGTACGATCCGACGATCGAGGACAGTTACCGCAAACAGGTCG  
AGGTCGACGGTCAACAATGTATGTTAGAAATCCTAGACACAGCCGGAACGGAACAATT  
CACAGCTATGAGGGACCTTTACATGAAAAATGGGCAGGGATTTGTGTTAGTATATTCTGA  
TAACGGCGCAATCGACGTTCAACGACTTGCAAGATCTCAGGGAGCAGATTCTACGGGT  
GAAGGACACAGATGACGTGCCTATGGTGCTGGTGGGCAACAAGTGTGACTTGGAAGA  
TGAGAGGGTAGTGGGCAAAGACCAGGGCGTCAATCTTGCCCGGCAATTTAATTGCGCA  
TTCATGGAGACTTCTGCCAAAGCCAAAATTAATGTTAACGATATTTTCTATGACCTGGTA  
CGACAAATAAACAAAAAATCGCCAGAGAAGAAGATGAAGCAGAAAAAGAAATCGCT  
GTGCCTACTTCTGTAAG

>novel\_circ\_000986

GGGCGCAGTATGTGCCCGGCGTTGGGCTTGGCGCTGCACCCCAGAACAGGAGCTTCAA  
TTTCGAATATATACCGAATTATCCACCGACCAAATCGACAAATACAGGGGTGGTTCTG  
GTATACAAAAGAGAATGACTCAAAGGGAAGATACGTTGAGATTCGAGCAGGGCCGTAT  
TAAGGCCTTGCAGGAAGAACGTTTGCATATACAGAAGAAAACATTTACTAAATGGATTA  
ATTCATTTTTATTGAAGGCACGTATGGAAGTAGATGATTTATTCACGGATCTAGCGGACG  
GCAAGAAGTTACTGAAATTGCTGGAGATCATCTCTGGTGAACGATTGGCCAAACCTAA  
CAATGGTCGTATGCGAGTACACAAAATCGAGAACGTGAACAAATCTCTAGCATTTCTTC  
ATACAAAG

>novel\_circ\_000987

TATATCGAAGAATTTGGGACTGATCATGTTTACAACCTGCGACACTTTCAATGAAAACGA  
ACCCTACACCAGTGAACCTCAAATTTCTGAGGAACATAGGGCATTCAATTTTCGAAGCTA  
TGAACAGCGTTGACTCAAAGCGATATGGTTAATGCAAGGATGGTTGTTTTATCATGAT  
TCAGTTTTCTGGACAGAGCCGAGAACTCGAACATTTTAACTTCAGTCCCATTGGGAA  
GAATGATAGTACTGGATCTTCAATCAGAACAATTTCCACAATACAAGAGATTAAATCTT  
ATTATGGTCAGCCATTTATCTGGTGCATGTTGCACAACCTTTGGTGGCACCCCTTGGAATGT  
TTGGTTCCGCTGAAATTATTAATCATCGAGTTTTTCGAAGCTAGAAATATGAATGGCAGTA  
CAATGGTCGGGACAGGTCTAACACCAGAAGGTATAAACC AAAATTACGTCATCTACGA  
GTTGATGAACGAGATGGCTTATCGTAAGAAACCCGTCAACTTGGATAAATGGTTCGAA  
AATTTTGCCAATCGAAGATACGGCGATATCAAAGGGAACGAGCACACTGTTACAGCAT  
GGAAAGGTTTTAAGAACACGGTGTATAATTTCTCGGACACCAGGAGAATTAGGGGGGAA  
ATACGTGATCACCATTTCGACCAAACCTTAAATTTCTTTCCATGG

>novel\_circ\_000988

AAAAAAGGAAACACCACCGAATGAAAAACCAGAAATTGTTAAAACCTCATTTACGTAAT  
ATGATTATCGTACCAGAAATGGTAGGCTCAATTGTTGGTGTTTATAATGGTAAACATTT  
AATCAAGTTGAAATTAAACCCGAAATGATCGGTCATTATTTGGGAGAATTTTCTGTTACT  
TATAAACCTGTAAAGCATGGTAGACCAGGTATTGGTGCTACTCATTCTTCAAGATTTATT  
CCACTAAAGTAATTTATATTTGTAATGTGAATAAACTGTACAAAAAATAA

>novel\_circ\_000989

GAAACACCACCGAATGAAAAACCAGAAATTGTTAAAACCTCATTTACGTAATATGATTAT  
CGTACCAGAAATGGTAGGCTCAATTGTTGGTGTTTATAATGGTAAACATTTAATCAAG  
TTGAAATTAAACCCGAAATGATCGGTCATTATTTGGGAGAATTTTCTGTTACTTATAAAC  
CTGTAAAGCATGGTAGACCAGGTATTGGTGCTACTCATTCTTCAAGATTTATTCCACTAA  
AGTAATTTATATTTGTAATGTGAATAAACTGTACAAAAAATAAT

>novel\_circ\_000990

AAATCCCGCGGAGATGTCGCACACGTGCCGCGGCACAATATCCTTGACGGGGCCTTA  
ATACACACCGTGACGCTTGCACATTCGTTGTGAGCAACGGTGGTACGCAAACCTTCC  
ATATCAAGGCAGCGACAGAGGTAGAACGTCAGCAATGGGTCACGGCCCTTGAGTTGG  
CGAAGGCCAAGGCTATCCAGGCCATGGAATCTGAAGAAGAGGAGGAGGAATTTCAAG

ATAATGACAGTCAAAAACCAGAACAAGTCTCTGTAAAGGATCTATCACAGCGTTTAGA  
AAATTTACAAGCCTGTAATGACTTATTAGTAAAAAAGGGACAATGCTTCAGCGGATCT  
TAAACGAGCTTGAAGCGTTGGAGCCTCCATCGGCCGAATTAGGGACAAAAATAAAGAC  
AGTCAGTGAACGAGCCACACTCTTTCGCATCGCAGCCAGTGCTATGGTTAATGCAAGC  
AATGAATATTTGCAATTAGCGCAGCAACAAGAACC AAAATGGAAAAAGATGTTGCAAC  
ATGAGCGCGATCAGAAAGTACGAATAGAAAAAATGGTAGAACAATTGGCTAGGCAACA  
TTCTCATTTGGAAGAGGCTGCACAACATGCCTTACCTTCGGCAGTTCCAACAGGAGGA  
CACAGAGCTTCGC

>novel\_circ\_000991

AAATGGTCGAGGCGATGAAGAAGGTCGCCTCGTTGGATGTGGAGTTAACCGTCGAAG  
AGAGGAATCTTCTTTCTGTCGCTTACAAAAATGTGATTGGCGCGAGAAGGGCATCCTG  
GAGAATAATCTCCAGCATCGAACAAAAGGAAGAGAACAAAGGTGCCGAGCGGAAACT  
AGAGATGATCCGCCAGTACCGATCTCAGGTTGAAAAAGAGCTGAAAGACATCTGCGCC  
GATATCCTCGGAGTTTTAGACAAACATTTGCTCCCATGTGCATCTACTGGCGAATCGAA  
AGTCTTCTATTATAAAATGAAGGGTGATTATCACCGTTACCTTGCTGAATTCGCCGTTGG  
CAACGATAGGAAGGAAGCCGCAGAGAATTCTTTGGTCGCTTATAAAGCAGCAAGTGAC  
ACCGCCATGACGGATCTACCACCAACTCATCCCATCCGCTTAGGATTGGCGCTCAACTT  
TTCCGTGTTCTATTATGAGATTCTCAATAGCCCTGATAGAGCATGTCGTCTTGCGAAGGC  
AGCCTTTGACGACGCGATCGCGGAAGTAGACACCTTATCCGAGGAGAGTTACAAAGAT  
TCTACCCTCATTATGCAGCTTCTTAGGGACAATCTTACTCTATGGACGTCAGACATGCAA  
GGAGACGGGGAGGGCGAACAAAAGGAGCAGTTGCCAGACGTGGAAGATCAGGACGT  
ATCGTAACTCTAACTGTA

>novel\_circ\_000992

ATCTTATACAGAAAACAGAGATGAAGGTGCATGGTTCTATCTTAACTGTTTTTCCAACT  
GTTTTTTCAGTTAATCGATCAACCATGTAACCTCCAGCTCTGGGGAGGAGACGAGTTTAT  
CCCTTAGATAAACGAATGATTTACACTCGATTTACACGCATACATTAATAATATTCGTTAT  
TTATCATAGTATGCGAGAATAATGATGCGCGCAGTAAAAAAGCGGGGAAGAGGACGAG  
GAGGAGGAGATTGGGGGTGGGGTGAAAACAAACGAACACAATATGCATTTTCGATCGA  
CGTCGAGCCATTAATTCGTTATTGATAAAACATTGCGGAGAGGATAATGCTTATTCCTTA  
TTTCTCACTCGCTGGAGCAAACAAAATGAGAGTTTATTCCGACTGGATTAGCGCATAT  
TCCTTTTCTTTTTTTTTTCTTTTTTTTTTTTATTTCAATTTCTGATGCTTTTCTGGTTTCATTG  
CTATTACGATCGAATATATGACTACGCGCTGCAACAGTCGGTGCCAACTCAACTGGTTC  
TCGACATCGTACACTGAAAGAGACAGCATCTTTTTTCTCTTCTCGATACGCAAAGAAG  
GCAAAGAATAATGCCTCTCTACACACGCTCTTGACAGCTTTTCTATTTAACCGCGTTAAT  
GAGTATGTCCTTTTATTTTTTATAACTTTTCTGCGCGCTTCGTAATTTAGTGTGTATTATTT  
CGAATGATATTTTTTTTTTTTTTCAATTTTGTATTTACTTTTTTTTTTTTTTTTGGAAATAACC  
GTACGTGCGTGCTTAGAACACGCAACCGTGTTAAAGATCTCCCCTCCCACCCCGAAC  
TGCCACCTGCTGAATTGTTTTCTTACAAGTTTGCTTACAAGTTATTAAGAGTTTTTTTGCT  
TTCTTGTTTTTTTTCAGTTTTATATACGCATAATAACACTCACTACAGTTAGAGTTACGAT  
ACGTCCTGATCTTCCACGTCTGGCAACTGCTCCTTTTGTTCCGCCCTCCCCTACGTAACA  
CAAAAAGAAAATTTGTTAATAAACTGTACTCGATGATTATACAGTTACATAAAAATGTC  
AATTATGTAACAACTAAGATAGGGTGGGGTCGATTCAACTCATAATTAAGTTGAGT



TCATTTCAACCCTACCCTGCTAATTGAAGGATCTACTAAATGGTTAAGAAGGAAGGAAG  
GAAGGAAGGAGAAGGATCGATCGAGTTGCTCACCAGGTGACTTTATAATGCAAGGGC  
GTATGGAAAGGATGCCTGAGTTCAAGCATTGGTGGAAACCGCGGCAGCCTCGTTTTTCG  
CGGTCAGCCTCGAACTCTAAATCACAGACCAATAATTCTCTACCCATATATAAATATATAT  
GTATATAATTTCAATAATCATTATACAGAATTATATGTGAATAATAATGCAACTAAAAAAT  
GTCTTACCTAATAGAAAACCTTTACTTTCTTTTTTGGTTTCAATTCAAAAATTTTTTTATAT  
CATGATACACAAATTTTCATCAAATAATAAAAAAAGGATCTCATAACGTTCTCTGCACAA  
TTTCGTGAAAAAATCTGATATATAAGAGAGAAGATTTTATCGCGCTGCTGCAATACATA  
TTATTGATCGTACGACACAACCTTCTACCGTTTTAGTAGTGGTAGTTTGTGAACGTTTTAA  
ACGAGCAATTTTTTTTTTTTTTTTTTGAACAAAAAAGATATATACTAACCGTCTCCTTGCA  
TGTCTGACGTCCATAGAGTAAGATTGTCCCTAAGAAGCTGCATAATGAGGGTAGAATCT  
TTGTAACCTCTCCTCGGATAAGGTGTCTAGTTCCGCGATCGCGTCGTCAAAGGCTGCCTT  
CGCAAGACGACATGCTCTATCAGGGCTATTGAGAATCTCATAATAGAACACGGAAAAAG  
TTGAGCGCCAATCCTAAGCGGATGGGATGAGTTGGTGGTAGATCCGTCATGGCGGTGT  
CACTTGCTGCTTTATAAGCGACCAAGAATTCTCTGCGGCTTCCTTCCTATCGTTGCCA  
ACGGCGAATTCAGCAAGGTAACGGTGATAATCACCTTC

>novel\_circ\_000993

AAAAAAGAAAAAAGAAGAAACGCAATAACATCTTTGTCTTTATGTCTTAAGTCTGG  
CTTTCGCAGTATCAAATTTTATGTTAAGTCGAAAACAAATTCTTTTTAATTTTGTGAGTA  
AGAGAAAAATATATATATTCGCTATTCTCGTCGTAA

>novel\_circ\_000995

GACCTGATGACGAAGAACAAGCAACGGAATTGGCGACGATTCCTGGCCGGCTGCTTG  
GTCGCCGTGGTCGTGCTCGGCCTGGTCATCGCGGCGACCGTTCTTTTGACCGGGAGCC  
CGGATTCTCGGCCTCGAGGACACCCCTCGCCTCCGGCATTCTCTCGAGGAGTGGCT  
CGCCGGCTCCTTATCCCCGAAAAGCTTCAACGGGACATGGATCACCGGAAACGAGATA  
CTGTATCGCGATGAAATTGGGAATCTCTTGATCTATAACGTCACATCGAGAAAGCCGAG  
GAAAATCCTGGACTCGACCAATAACGTGCTGATATTGAGTTTCGATTACCAACTGTCCG  
CCGACCGGAAATATCTTCTGCTGGCCATCAACTACCAGAAG

>novel\_circ\_000996

AGTGGCACGACCAATCCTACGGTGAAGCTGTTCTACGTCGACTTAGAGAAAGTGATCC  
AAGGTAACACGAACTTAACTGAAATCGAACATCCGAACAAGTTATCCACCGAGGAACG  
GATTTTATCCGCTGTTGCTTTTCTACCGATAATCTCGTGTACGCGACCTGGATGAACAG  
GGTGCAAAACAGGGCGTACTTCCATTTCTGTTACGTCCACGGCCATCTACCCAATTGCA  
CCACCGCGCTGACGCACATAGAGAGCCACGGATGGGTGGAACAGTTCGAGCCACCGA  
TGTTTCAGCGATGACGGGACACGTTTCTTACGATCTTGCCCAAAAAGCAACACGATGG  
AAGTTACTGGAGGCATGCAGTCGCAATTACCAACGTTTCTTCCACCACGCCGAGGAAA  
ACCGCCCTCACTTCCGGCCGCTTTGTCTGTCACGGAGATAGTTTCTTGGGACCAGAAGA  
AATCGTATCT

>novel\_circ\_000997

AATTCCACGAAGATGCTGACGTGGGAGGCGAACGAAGCAGTCTCCGAGATTATCGCGG

AGAAATCGCAACCGGTGGTGCGCCGTTTCAAGGTGCCGGTTCCCGGAGGATTCTGAAG  
CCCGTGTCAGACTTCTGATTCCGCCGAATGCTGATTTGTCGGGCGCCACCAAATATCCC  
ATGCTGATCTTCGTATACGGTGGGCCAGATTTCGTATCAGGTGACGGAGAAATTCGATGT  
CGATTGGGGCACGTACCTTGTAAACGAATAAAAGCATCATCTACGCGACGATCGACGGC  
CGTGGATCCGGCTTAATGGACAACGGCATGCTATTGCGCCGGATATCGAAACTTGGGAAC  
CGTGGAGATCGCGGACCAGATCAACGTTACCAAG

>novel\_circ\_000998

GGTGGTGGCGGTTTGGTTCAGCATTTGAAGAAGAGCTACAGCCTGAGCGACCTGACC  
GGCGAGAAAGAGGACGAGAATAGAAACACGCCGCACATGCACGACGAGACGGACAT  
GGAAGTGGAACCTCGTCGAAGAGAGCACGTGGGTAGAAGGGGGGTACAGCCCTCGTCG  
GACACAGTCGAGCAGCAATCGCGTGGAGATGTACTTTTCCGAGGTGGACGTGGACGT  
GAGGCAACCGCGGTCCAGAGAGCCGACAACCAGCTTAACCAACATAAGGTCTCTCGGA  
CGACATATCGAGCGGGTACAGCAGCGGGGAAGCGCTGCAATCTAGCCGCACGTCTCAA  
GGCGATTCTGTTGGTGC GGACATCGAGCGTCGGCGCAAGAACACGGGGCAAACCTCGC  
TCAGCGACCAAGAAGACCCAGAG

>novel\_circ\_000999

ATTAGTGTTTCGGCAATTTGTACCCGGCCTACGCTTCTTACAAGGCGGTGAGGACGAAG  
AACGTGAAAGAATACGTGAAATGGATGATGTACTGGATCGTGTTTCGCGCTGTTACAGT  
GCGCGGAGACCTTCACCGACGTCTTCTTCAGCTTTTGGTTTCCATTCTACTACGAGATC  
AAGACTATCCTGGTGATCTGGCTACTGAGTCCGGCCACCAAAGGGTCGAGCATCCTTT  
ACAGACGTTTTCGTCCATCCCGCGTTGATCCAACGAGAGGCTGAGATCGACGAGGCTCT  
GGCCCGCGCCACGGAGCAGGGTTACACGGCCGTGTTGCATCTGGGGTCCAAAGGTGT  
GAATTACGCCACCACCGTTCTCATGCAAACGGCCATCAAG

>novel\_circ\_001000

TTTGATGCGTCGGATCGGGGCGACGGGGATCGAAAAGAATTTCGGAGAGGGGACGGTC  
GCGGGTATAGCGAGGAGAATCCAGGCGGGACGAAGGGGGAGGTGAGGGAGAAATTC  
GGCCCGCGCGTGGAATGGAAATGAAAAGGGAGGAGCCTCGACCGGATGAAATCGAGG  
AGAATCCGTTTCTCTGGATCGTGTGCAAACGGGGGCCCCCGTTTAATAATAACGAGC  
TTTCACGCTGTCGCACGTTACTGCGCCGATCAGATGCCAAAGAAAATGAGCCTGGGCT  
TCCTTCGAACGCTTGCCGCCCTCCTGGTAATAGTGATGCCCCGATCGCTCACTTACGTT  
CTCCTGTATCCGATTTTCAGATTAGTGTTTCGGCAATTTGTACCCGGCCTACGCTTCTTAC  
AAGGCGGTGAGGACGAAGAACGTGAAAGAATACGTGAAATGGATGATGTACTGGATC  
GTGTTTCGCGCTGTTACAGTGCGCGGAGACCTTCACCGACGTCTTCTTCAGCTTTTGGTT  
TCCATTCTACTACGAGATCAAGACTATCCTGGTGATCTGGCTACTGAGTCCGGCCACCA  
AAGGGTCGAGCATCCTTTACAGACGTTTCGTCCATCCCGCGTTGATCCAACGAGAGGC  
TGAGATCGACGAGGCTCTGGCCCGCGCCACGGAGCAGGGTTACACGGCCGTGTTGCAT  
CTGGGGTCCAAAGGTGTGAATTACGCCACCACCGTTCTCATGCAAACGGCCATCAAG

>novel\_circ\_001001

ATCCTCGTAGAATACGACGACGTGGAGTGGCAAAGGAGGGAATGGCTATCGCCGCACA  
GGGACTCGGTGTTCTCGTTCTTCTGTTGGAGAAGGGTCTGTGCTGGGCCGAGCGGCC

TGATCCAAGGCATGCCAGCCTCATCGCCATCGATCACCACAATCACGCGAATAATAACC  
ACCACCATCACCGTATCAACGGGAAGCTGCTGAGGGGCGCCACAGCTGTCGCCAACA  
CGGTCGCCTGGCCGGCTCTCACGTTTTATCCGCTGGTGGCGCGTGCAGAGTTGCCGGA  
AGACGCGATGCCTCTCGAATTCATGCAAGATCGGAGGCTGGACTTTGTGATTACTCGA  
AGCTGAAGCCGTTTACC

>novel\_circ\_001002

ATCCTCGTAGAATACGACGACGTGGAGTGGCAAAGGAGGGAATGGCTATCGCCGCACA  
GGGACTCGGTGTTCTCGTTCTTCCTGGTGGAGAAGGGTCTGTGCTGGGCCGAGCGGCC  
TGATCCAAGGCATGCCAGCCTCATCGCCATCGATCACCACAATCACGCGAATAATAACC  
ACCACCATCACCGTATCAACGGGAAGCTGCTGAGGGGCGCCACAGCTGTCGCCAACA  
CGGTCGCCTGGCCGGCTCTCACGTTTTATCCGCTGGTGGCGCGTGCAGAGTTGCCGGA  
AGACGCGATGCCTCTCGAATTCATGCAAGATCGGAGGCTGGACTTTGTGATTACTCGA  
AGCTGAAGCCGTTTACCCAGGACTGGGAGCTTACGAAAGGCTCGGTGCCTTGGGCGA  
GCGCCGTCAGGCGATGGGCAGAGATGCAGGACGGGCAAAGGATCCTGCTCACCACGC  
CGAGCGTTCTGGTCGGCTTCAGGGTTCGAAGTTTATCGGGCCGAGGGCACCACGCAATG  
GTAACTGCCGTCATCGTTGGTTACAACGAGTCGACCAAGGATTTGACCGTCACCGAT  
GACACAGTTCTCGAGGACCACAACGAGGACCCAGCCTAGTACAAATGCGGTTGATC  
GGCGACGGAGTCGTGGAGAGCATCATGAGAGGCGAGGTCGTTCGGCATGACACCGAGG  
AGGTCGAGGTCATCGACTGCTCTGACGCACGCGCTTGTTGTG

>novel\_circ\_001003

ATCCTCGTAGAATACGACGACGTGGAGTGGCAAAGGAGGGAATGGCTATCGCCGCACA  
GGGACTCGGTGTTCTCGTTCTTCCTGGTGGAGAAGGGTCTGTGCTGGGCCGAGCGGCC  
TGATCCAAGGCATGCCAGCCTCATCGCCATCGATCACCACAATCACGCGAATAATAACC  
ACCACCATCACCGTATCAACGGGAAGCTGCTGAGGGGCGCCACAGCTGTCGCCAACA  
CGGTCGCCTGGCCGGCTCTCACGTTTTATCCGCTGGTGGCGCGTGCAGAGTTGCCGGA  
AGACGCGATGCCTCTCGAATTCATGCAAGATCGGAGGCTGGACTTTGTGATTACTCGA  
AGCTGAAGCCGTTTACCCAGGACTGGGAGCTTACGAAAGGCTCGGTGCCTTGGGCGA  
GCGCCGTCAGGCGATGGGCAGAGATGCAGGACGGGCAAAGGATCCTGCTCACCACGC  
CGAGCGTTCTGGTCGGCTTCAGGGTTCGAAGTTTATCGGGCCGAGGGCACCACGCAATG  
GTAACTGCCGTCATCGTTGGTTACAACGAGTCGACCAAGGATTTGACCGTCACCGAT  
GACACAGTTCTCGAGGACCACAACGAGGACCCAGCCTAGTACAAATGCGGTTGATC  
GGCGACGGAGTCGTGGAGAGCATCATGAGAGGCGAGGTCGTTCGGCATGACACCGAGG  
AGGTCGAGGTCATCGACTGCTCTGACGCACGCGCTTGTTGTGCGGAGACCTGGAAGG  
AGGCCCCGAGGACGTCCTGGGAACGCCACACAGTTGCACACAGCGCCTAGGATACAA  
AGCCCTATTTCTCAGCATCTCGAGAAAG

>novel\_circ\_001004

CAGGACTGGGAGCTTACGAAAGGCTCGGTGCCTTGGGCGAGCGCCGTCAGGCGATGG  
GCAGAGATGCAGGACGGGCAAAGGATCCTGCTCACCACGCCGAGCGTTCTGGTCGGC  
TTCAGGGTTCGAAGTTTATCGGGCCGAGGGCACCACGCAATGGTAACTGCCGTCATCG  
TTGGTTACAACGAGTCGACCAAGGATTTGACCGTCACCGATGACACAGTTCTCGAGGA  
CCACAACGAGGACCCAGCCTAGTACAAATGCGGTTGATCGGCGACGGAGTCGTGGA

GAGCATCATGAGAGGCGAGGTCGTCGGCATGACACCGAGGAGGTCGAGGTCATCGAC  
TGCTCTGACGCACGCGCTTGTTGTG

>novel\_circ\_001005

CAGGACTGGGAGCTTACGAAAGGCTCGGTGCCTTGGGCGAGCGCCGTCAGGCGATGG  
GCAGAGATGCAGGACGGGCAAAGGATCCTGCTCACCACGCCGAGCGTTCTGGTCGGC  
TTCAGGGTTCGAAGTTTATCGGGCCGAGGGCACACGCAATGGTACACTGCCGTCATCG  
TTGGTTACAACGAGTCGACCAAGGATTTGACCGTCACCGATGACACAGTTCTCGAGGA  
CCACAACGAGGACCCCAGCCTAGTACAAATGCGGTTGATCGGCGACGGAGTCGTGGA  
GAGCATCATGAGAGGCGAGGTCGTCGGCATGACACCGAGGAGGTCGAGGTCATCGAC  
TGCTCTGACGCACGCGCTTGTTGTGCCGAGACCTGGAAGGAGGCCCCGAGGACGTCC  
TGGGAACGCCACACAGTTGCACACAGCGCCTAGGATACAAAGCCCTATTTCTCAGCAT  
CTCGAGAAAG

>novel\_circ\_001006

GACTGGGAGCTTACGAAAGGCTCGGTGCCTTGGGCGAGCGCCGTCAGGCGATGGGCA  
GAGATGCAGGACGGGCAAAGGATCCTGCTCACCACGCCGAGCGTTCTGGTCGGCTTC  
AGGGTTCGAAGTTTATCGGGCCGAGGGCACACGCAATGGTACACTGCCGTCATCGTTG  
GTTACAACGAGTCGACCAAGGATTTGACCGTCACCGATGACACAGTTCTCGAGGACCA  
CAACGAGGACCCCAGCCTAGTACAAATGCGGTTGATCGGCGACGGAGTCGTGGAGAG  
CATCATGAGAGGCGAGGTCGTCGGCATGACACCGAGGAGGTCGAGGTCATCGACTGC  
TCTGACGCACGCGCTTGTTGTG

>novel\_circ\_001007

AGAAGAACTCTGCGCGCAACAGCCGGCGGCGACGGGTGAGCGAGGGTGGTGGAGGC  
GGGAGCCGCGAGAAGGAGGGCAGCGGTAGCAGCGGGCGAGGGTGGGAACGTATCGTC  
GTGCCGGCAGTCGGAGGACAGGGAGAATAAGGGCCCCGCGTCGTCGGGCAGGCCCCG  
CAATCGCGTGCCACGGCCCGTCTTGTTGTCGGAGGAGGCGAACAACACCGCCTCCAA  
GCTCCGGAAACGCGGCACCGCGGTCAAGAGCCCGATCGAGAATCAAAGACCCGTGAG  
ACGGAGGCCGAGGCGACTCTCCTCCGGTTGCCAGGAGACGAGGACAGAGGCGGCCG  
CCGCCGTCGTCGTTGCTGCTGCTGCCGCCGCCGCTGCTGCTGCTGCTGCTACTGA  
ACAGGAGGAGGAGGAGGAGGACGACGAAGAGGAGGAGGACGAAGAAGAAGAAGAG  
GAAGAAGACGAGGAAGAGGAAGAGGATATCGAGCAACAACAGCAGCGCAACGTAAA  
ATCGTCGTCCGAGAAGGAGGAGGACGAGGACGAAGAGGAGGAGGAACGATTGGGCG  
GCAGATCCGAGGCGGAGAACCGTGCGGAGCAGGAGAAGGAGGACGGGGGAGGAGG  
AGGAGGAGGAGGAGAGCGTTGCTGCGATCCTCTGACCAAGAGGCTCAGGACAAGTCC  
TGTCGCTGCTGCTAGAAAGCAGCCCAGGCCGGAGAGGAGGAAAGGAGGGAAAGGTT  
GTTGCGACGAGGAGGCAGCGTCCGATCTCGAGGAAACGGAAGAGGAGGAAAGGAAG  
GCAGAGGACGAGGAGGAGGAGAAGGAGAGAGGGGGGAGGGTCGAGAAGAAGCTAG  
AGGAGGACGAGGAGAGCCAGTCGAGGGAGAGGGACAGGGAGCCGGAGCCACCGCCT  
CCGAACAAAGTAGATCCGGGGGGCGACACCGTTTCGATTTAACGCCGCCGGTCGGAAG  
GAGGAGGAGGAGGGGGAGAGGCGGCAGCAGCAGCAGCAGCAGAATCGGAGGCAGC  
AGGTGTTGGTGGTGAATGGATCGTTGCTCGACTCGTCGTCGTCGTCGTCGTCGTC  
GGCCCTCGTCGTCGTCGAGGAGAGCGGCGCCTCCTCGCCCTCGATCCCACGCCTCG

GCCCCTCGGCCGTTGAAATCGGCTTGTTGCACCGTCGAGTCGAGGGCGAGCGCCAAG  
CCAGGGGGAGGCTGCGTCCTCGAAGGCCAGGCGGAGGCGGCGGAGGAGGAGGAGGA  
GGAGGAGGAGGAGGAGGAGGAGGGGGAGAGCGAGGACGGGGAGGACGGGGAGGA  
GGGTTTCGGCGGAGGAGCGCGACCGGGGGAGGCGGCGGAGGCGGAGGAGGAGGAGG  
AGGAGGAAGGGACAGGGGGAGAAGGAGGAGGAGGAGGATCGGGAGCAGGAAGCGC  
GGGAAGAGCAGCGGCAGCAGCAGGAGGAGGAGGAGGAAGAGTCGCGGAGAGCCGA  
GGAGGTGACTACCGAGGTAGGCACGGAGGATAGCGTGGGTAGCGCGAGCGGCGCGAG  
GGCGGCGAGCGTGGAATCGGTGGTCGAGCTGCTGGAGTCGAGCAGTCAGGACTCAGG  
CTCCGTGCTGGAGAGGCTGAGTCCGCTTAGTGGCAGCGGCGGCGGCGGCGGCGGCGG  
CGGCGGCGGCGGCTCTGGCAGGCAGAGCCTGCTCCTGGAGCAGCAACGGGAGCAGG  
AACGGAATCGGCACAACGAGAGCCCTGTCATTCTAGCCGAGAGGCTGAACAAGCCGC  
CACCGCCGGTACCCGGTCACCATCACCATCACCTTCAACAGTACCATCAGCACCATCAT  
CACACGCCCCCTCACCACCACCACCAACAGCAACGTTACTCGACCGGTAGTCCCGTGA  
TACATCACCATTTCTCAGCAGCAGCAACAGCAACAGCAACAACAGCAGCAACAGCAGC  
AACAGTTGCACCAGGTAGCGAACAGCGGGCACCATCAAGCGCAGCATCAGCAACAGT  
CGCAGCATCATCACCAGCTGACCCCCTCGAGCCTGCTCGAGGTGCAACAGCAGTCGCA  
CGCATCCAGGGGCGGCGATGAAGCCGGCCTCATGGAAGTGAGGCCGGGGCCGGTAT  
ACCTGGAAGCGGCGTGCTCAGCGGCGTGCCAGCGGCGGTTCGGGATTCGGGCGGCGGT  
CGGAGGTGTGGCCGGCGGCGGAGCGGCGAGCGGCGCGTATGGGGACAGCGGGTCGG  
ACAGCGGGGTGAGCTCGTTGAGGAGCGCCGGGTCCGGGGACGAGAGGAGCGGGAGC  
AGGAGTTTCGGCGCTCAGCGTGGACGAGGCGACCAACTCGTCGACGCCCGCCGCGGCC  
ACCACGCCTGCAAGGGTCTGGCACGTGCAGAGCGTTCAGCACACCTCGCTGCTCATG  
GCCATCCTCAGCCGCCCCCACC GCCGGCCCGAGCTCGGCGGCGCGGCGGCGGCCG  
ACCGCTCCGCCGGTCGGCTACCAGAGCCCGGCACCTCCGCCCGGTACCAACCATCCCG  
CCGTCGCGTCCGAGATGCTGTGGCGGTCGCAGAGGTACCCGCCGTTGCCCCACTCGTT  
GCTCGGACCCGCCAGCCACCACCGAGGAGATCGTCGAGAGGGAGAGGATACTTCG

>novel\_circ\_001008

AAATGTGTTTCAGTAAAACTTGGAAGAGAACAATCGAAAGTATCAACAATGGGCGCAA  
TTGTTGATTTCGAAGCAATCTTCTAAACGAGCAAAAGCGACATTTGGCAGTAGCCGCGT  
CGTGGATAATAATACTTGATAATGATAATAATAGATGGGCGATATCGAAGCCAATTTCTC  
CCGACTACGCTTTTCTCCTGGCTGATGGCTCGAGTAAACATTGCCCAATAAATTTTAA  
TTCTTTCCCCCTCCTCTCCTGTTCAATAAGCGATTCTTATATACCGGGTGTTTGCAAGAA  
TAAGAAATTCTTATCACTTTCAAAATATATTAATAATTTTCATTATACAATTTAGTTAATT  
GGATGATGCGAAAAAGAAAAATAGAAAATCGATTGTTGAAAATCGTTAATTTGGAAAA  
AAGAAAAAGAAAGAAACGTTTTTTTATTAAGCGAGAAAAAGAACTTGTGTGTGTAAC  
CTTGAAACTTTTGTACGTGTTCCAGGGAGCGGCGAGAAGCGGAAGCTCGGCTGGAGA  
AGCGTGAACGAGAAAGAGAGGCCAAGATGGAAAGGGAGAGGCTGGAGAAGCAAAG  
GGCCGCCGAGCAGGCAGTTCACAAACACTTCGAGGAGTCCCTAAGGCTGGCGCAACA  
AAAG

>novel\_circ\_001010

GTA AACGAAAGAGGGCGCAGCACGGAGGCAGCAAACGACCGCGGAAGATCAGCG  
GAGGCGAAAGGAAGATAAACAAGGAGGAGGGGCTGGTGTGGGCAGTGAATCTAGTAA

CGAGAGCGAGGCTGGTTCTGCCAGCGATACGAGTGAACAGTTGGGTTCCATTCAACCT  
ACATCGAGGGTGCGGCATACCACGGCCAATTCCAACAATTCCTCGGGAAACGGTTAGT  
TGACGTGTAGTAGCTTCTTGTAATGGACTTCCCATCAGGTGAACTAACTATTCACCTG  
CAGG

>novel\_circ\_001012

GCCACGAAAGAATTTATAGAAGCAGTTAATAAATGCCGGGCTGGAAGGAGAGCTGGTC  
CAGTATCATGGAGCACGGCTGTAAAATTTTGGACAGCAAGGAAATTCGAAGTAGCGAG  
AGCACTAGCATTGTATGAACAGCACGAAGCCACCAGAAGAAGAGAGGGTCTTGCACT  
TTTATATCCTACTCAGGAACCTTTGCTCACTGAATTACGCACAGGAAAATTTACAGTTTT  
ACCTTCACGGGATGCTACAGGGGCAGCCATAGCTATTTTACAGCACATTTACACCTTC  
CACAAAATACCACTCATCAAACAACATTGCAAGGCGTTGTATATCAATTAGATGCAGCT  
CTAGAAAGTGTAGAAACTCAAAAACACGGTCTGGTTTTATTATGACATGTCGGATAG  
CAAATATCAGAATTTGATTATGATCTATCCAAAAGATTCTCACCTTCTAAAGGGTGG  
TTATCCAGCTAAATTAAGGAGTCTTAATAGTGACGGCACCGTTGTGGTTCAAAGCCC  
CCTTCAAGATCCTTCGATTATTCGTACGGGAAAAATTAAGGGATAGAGTATTCACCGTAT  
CCATTCCCCAATTAACATTACACATCCACGGGAATCATTACCGCATCGTTTGGGCGGC  
ACGTTGGAGATACAGCATGAGGCATGGCTTCTTCACTGTCTTAAATCCATGACAAACAG  
GGGCGGGGGTGAACTTTGCGAGGTTACCCCCAGAGTGGGTACTCCTCTTTCACCCACA  
ACGAAAAACCAAACAACAGTTCACCAGAATCCCAATGGAACCTACGGTCAGTAGCTCA  
ACTAGTCCTATAATTGATAAGAACAAGGTGAAAAATGGTATCTCGACTATTGGGGATATC  
GAGATCACGAACGGTGATGTCTGGATGGGTACCGATGAGGCGCCATCCCCTGTTTCAGC  
CTCCGTCTCGGCTAGTTTCAGGTTTCAGTGACGACGACAGCCTTCACGGGGATCTTGG  
CCTTCAAGCCGTTACCATGGAACAGCTCATCGAAGAGATACACTCGAGGGGGCGCGCT  
GGGCTCATAGCAGAATACGCGGAAATTAGGCAAAGGCCGCCGAGGGTTCCTTCAATA  
ATGCCAAATTGAGATCGAATCAATCGAAAAATCGATACACGGATGTGCTTTGCTACGAT  
CACAGTAGAGTGTGCCTGTCTCGCAGATAGACGGAGACGCTACGTCTGGATTACATAAATG  
CTAATTTTCGTCTGACGGTTACAAGCAAAAGAATGCGTTTATCAGCACCCAAGGCCCGCT  
GCCGAAAACCTGCGGTGATTTTTGGAGAATGGTCTGGGAACAACAACATTGGTTGTT  
GTTATGACCACAAGAGTGGTGGAAAGGGGACGCACGAAATGTGCACAATATTGGGGT  
CCTGAGCCGGGCGACGAAGTACAAGCAGGTGGTTTTACAGTAACCACTCTCGAAGTTG  
ATACAAATCCAGATTACACGATATCGATGCTTCTTCTTACAAACAAAAAGACTGACGAG  
GCAAGAGAAGTTTGCCATATGCTATACACGGCATGGCCGGATTATGGAGTTCCACAATC  
GGCCAGAGCTTTATTACAATTTTTCAGCTTAGTAAGACAGCAACAACTAAGTTGCTTG  
CTAGTAGAGGAGATACATGGGCCGGGCATCCGCGAGGACCTCCTATAGTTGTTTCATTGC  
AGTGCAGGGATAGGAAGAACAGGAACATTTTGCACATTAGATATTTGCATATCGCGACT  
AGAGGATACCGGAACGTAGACATCCGTGGAACGTGTGAAAAAATCCGAGCACAGAG  
GGCCTACAGTATTCAAATGCCAGACCAATATGTATTCTGTCTCATCGTCTCTAGCAGAGTA  
TGCGCTTTCCAGGGGAATGCTTAGTTCACAACATCTTGCTATGTTACCTCCAACCATAG  
AAGAAGATTCTGATTAGATCTCTGTTATCATGTACCAGATTGATGTTCTTCCCAGGTATA  
CATAACAATCTCTCTTACATAGCCTATTTCTAGCTTAAATACTAAAGGTTATTTTTTGCT  
ATCATCTCCATCGATGTAATATTTCAAATTTCTATTCTTACGTTAGGCTATACGTTATAGA  
GGATATCTAAGGAAAGACTAGTTTTTTTCAAGGCTAAATGTAAGAACAGAAATTTTTTTT  
ATTTCTGTTTCTTGGTATTTTGCTCTGTGAATAAACGATTCAATG

>novel\_circ\_001013

GCAAATCACCGTTCTTCCCGAGTTTGGAGGATCAGAGCGGCACGCTGCTAGAGGATCC  
TAACGCGCCGAGCCAATTGGACGGCGTCGGTGGGGTCGGGGTCGGGGTCGGCGTCGG  
TGTTGGAGTCGGGGTCGGAGTTGGTGTGGGTGTCGGCGTGCGGCGTCGGTGTGGGGT  
CGGCGTCGGTAGCGGAATAACTGGATCTCAGACGGCACCGCTTTCCTCCCCCAGTCGG  
AGCAGTCCTCACAGTCAAGGCAGTGAAACCGGAGAACGCTTCTCCAGGAAAGTGTTTC  
GTCGGCGGCCTGCCACCGGACATCGACGAGGAGGAGATCAAAGCGAGTTTCCGCCGT  
TTCGGATCGTTGGTGGTCGATTGGCCTCACAAAGCTGAAAGTAAATCTTACTTTCCACC  
GAAGGGCTACGCTTTTCTTGCTTTTCCAGGACGAAGCGTCCGTGCAACAGTTGATCGAC  
GCCTGCATCCAAGACGAAGAGAACTGTATCTGTGCGTCAGTTCGCCGACAACGAAA  
GACAAACCGGTCCAAATACGGCCGTGGCGATTGAGCGACGCGGATTTCGTGCTGGACG  
CCTCGATGCCTTTGGATCCACGGAAAACGGTATTCGTGCGGTGGTGTCCCGAGACCGTT  
GAAAGCTGTCGAGCTGGCGATGATCATGGACCGACTTTATGGGGGCGTGTGCTACGCC  
GGTATCGACACCGATCCCGAGTTGAAGTATCCGAAGGGAGCTGGTAGGGTCGCTTCA  
GCAATCAGCAAAGCTATATAGCTGCCATATCGGCCAGATTCGTTCAGTTACAGCACGGC  
GACATAGACAAGAGAGTCGAGGTCAAACCGTACGTTCTGGACGATCAAATGTGCGAC  
GAGTGTGAGGGACAACGTTGCGGTGGCAAGTTCGCGCCGTTCTTTTTCGCGGAACGTTA  
CCTGCCTACAGTACTATTGCGAGCACTGTTGGGCGACGATTCATTCACGGCCGGGTGCGA  
GAATTTATAAGCCGTTGGTGAAAGAGGGTGCAGATCGACCTCGAACCGTGCCGTACC  
GCTGGTGTAAACCCAGCTGCGTTGTCCCTAATTATCTCGCAACCCTAGCTAATTAATA  
CCACTTCTACGTACCAACTCCTCCTCCTCCTCCTCCTCCTCCTCCTCCTCCTCCTCCTA  
CTCTCCTACCGCTGTCACCCACCCTGCCATTCAATCGAGAACCCCCCACCCTCCTC  
CCTGGCCCGTCCATCACCATCCCATGCTCGCATACCTACCTGCCTTCGGGCACAGGCAC  
AGCCCGAGAAACCGTTATTACCGCTACTACCCACTACTGATCGTCGGTACTATCGCTATT  
CTACTACTGTCGCTATTATCGCTCTATTTACCATTACTATTACCCACACACGCTCTATTATC  
GAAACCATCACGATTTATTATTATTATTATTCCACTATGAGTTTATTTTACTCTCCGATCC  
ATTGCTACTTGGACGTGTTTACACGGCGTGCGCTATAACCCAATCAGACATCGCCGAGA  
CCACGGCCGAGAAATATATCATCGTCGTACCCACCGCAGCCGCAGCCACAGCCATCG  
TCGCGCCACCGTGCTCCAACATATACCGACCGGAATATACCGTCTCGACGAAACGCATC  
GCACCGGACTCTTCCTCACCGACGACAACCTTTCACCGACTTTCGTCTCCACCACCAAG  
TTTGTGTATCGTGCCGCGTGTACAAGTGCGTGGTAACACAGCATAACATACATATATACA  
TATACACACACCGAACCGCCACGAGAGGAGAGCAGCGGTTTAGCAGCGGAGGGAGG  
GTTGCTGATCGACGACCGATACAGCAGCAGCAGCAGCAGCTCGTCGTCGATGGGACG  
GACGGGGCAACGGCGTGAGCGAGCTGATTCCTCGAGCGGGAGAGAAACAATGGAAC  
GAGGTGAGAGAGACGAAGAGAGAGAGAGAGAGAGAGAGAGAGAGAGAAAGGGAGCGACGTC  
GAGGACAGAAGAAGAAGAAGAAGAAGAAGAAGAAGAAGAACAACGCGGAGC  
ATCGCCCTTCCCGACCGACCGAGATGGAGCATGCGTTAGTTACCGACATCTATATCGAT  
CCACGCGTGTACACAGATGCGTATTTATGTAT

>novel\_circ\_001014

GCAAATCACCGTTCTTCCCGAGTTTGGAGGATCAGAGCGGCACGCTGCTAGAGGATCC  
TAACGCGCCGAGCCAATTGGACGGCGTCGGTGGGGTCGGGGTCGGGGTCGGCGTCGG  
TGTTGGAGTCGGGGTCGGAGTTGGTGTGGGTGTCGGCGTGCGGCGTCGGTGTGGGGT

```
>novel circ 001015
```

GCAAATCACCGTTCTTCCCGAGTTTGGAGGATCAGAGCGGCACGCTGCTAGAGGATCC  
TAACGCGCCGAGCCAATTGGACGGCGTCGGTGGGGTCGGGGTCGGGGTCGGCGTCGG  
TGTTGGAGTCGGGGTCGGAGTTGGTGTGGGTGTCGGCGTGGGCGTCGGTGTTGGGGT  
CGGCGTCGGTAGCGGAATAACTGGATCTCAGACGGCACCGCTTTCCTCCCCCAGTCGG  
AGCAGTCCTCACAGTCAAGGCAGTGAAACCGGAGAACGCTTCTCCAGGAAAGTGTT  
GTCGGCGGCCCTGCCACCGGACATCGACGAGGAGGAGATCAAAGCGAGTTTCCGCCGT  
TTCGGATCGTTGGTGGTCGATTGGCCTCACAAAGCTGAAAGTAAATCTTACTTTCCACC  
GAAGGGCTACGCTTTCTTGCTTTTCCAGGACGAAGCGTCCGTGCAACAGTTGATCGAC  
GCCTGCATCCAAGACGAAGAGAAACTGTATCTGTGCGTCAGTTCGCCGACAACGAAA



GACAAACCGGTCCAAATACGGCCGTGGCGATTGAGCGACGCGGATTTCTGTGCTGGACG  
CCTCGATGCCTTTGGATCCACGGAAAACGGTATTCTGTCGGTGGTGTCCCGAGACCGTT  
GAAAGCTGTCGAGCTGGCGATGATCATGGACCGACTTTATGGGGGCGTGTGCTACGCC  
GGTATCGACACCGATCCCGAGTTGAAGTATCCGAAGGGAGCTGGTAGGGTCGCTTTCA  
GCAATCAGCAAAGCTATATAGCTGCCATATCGGCCAGATTCGTTTACAGTACAGCACGGC  
GACATAGACAAGAGAGTCGAGGTCAAACCGTACGTTCTGGACGATCAAATGTGCGAC  
GAGTGTGAGGGACAACGTTGCGGTGGCAAGTTCGCGCCGTTCTTTTTCGCGGAACGTTA  
CCTGCCTACAG

>novel\_circ\_001016

GGGGATCCAAAAGGAGTTGGAAAGGGATATCCTCGATACGATCGGCAGGATACTCGTG  
GATCCTGGAACCTACGATTTATGGGGGACTTTAGCGCGGCGAGTCTCTTCTCTTCGAGTA  
GTAGTCAATTGTCAACCACGGGCAAATCGTCGATCGGGCAAATCAACGCAACCAGCAA  
TACCAACGTGGCCGCGTTACAATCGACGACGTCCACGACGATGCAGGACGATCTGTTG  
ATCGAGAAGCAAAGCGCGGGTGGGAAAACGGCGCCCCCTGTCCCCTGGGAGCACGGG  
CTTGAAACGGTCGGCGGTGGCCGCGAGGAGAAGGCGGCGAAAGACGGGGTCGAGG  
TCGAGGGTATCCCCATCACGCCGACGACGCCCTCCTCGGGCACGGAGAAGGAGATCGC  
GTGCAGCACGAGCTCGGCGTTGCAGAGTTTACGGAGGGCGGCAGGGTGCCGAGCCT  
GTGGTCCTCGGCCCCGGACGAGACCGGGCTGCACGCGTTGCCCCGTAAACGGGTCCATC  
GCCGCTTCCAGAACTTTCCGACCGGGCGGCCCGACCGGCTTGTTTCGCCGGCACGGGG  
CCGGCCGGCGCGCGCCGCGCTATCACGGCCAGCCACAATTTCCCGCAACAGCACGGG  
ACCGCGACCGCCCCCACC GCCAGGCACGGCGGCCTTCAAGTATCGTCCGCTCAACAAC  
AGCAGCAACAACAGCAACAGCAGCAACAGCAACAACAGCAGCAACAGTCGCAACAG  
CAGCAGCAACAGCAGCAGCATCAACAGCAACCGGCAGCTACCTCGCATCCGGGTGTTT  
ACCTTCCTGGGAAGGGGTACGCGGCTTGGTCAGGTGGGCCGCAAGCGCCTCAGCAAT  
GGAGCGCTGGGCCGCAAGCTGCAGCGGTGGCGAGCCCCGGCCTCTCGCCCTGGAACC  
GTGGCAGATCGGTGCCGAATCTTCCTCCCCTGCACTCGTCCCTGCACGCAGCGGCCGC  
GGCAGCGGCCGCGGTTCGGATTGCAAGGAAGGAAACCGAGTCCCACGTTTCCCGGCCA  
CCCGGGGCCGGCTGCTCATCCCTCCTGCATCAGCCCCGTTAAGTTTTCGAAGGAGCACC  
TCGTATCCCGGCAAGGGTAACATGTACCCGCCCAACCCGCACCGACCTTCGAAGTCA  
CCACCGCAGAGGAAAGGGATTTGTTACAGCTGCCGCCGTTCCAGCAGGATCGCATGAC  
AGCTAATGGAACTCACCCTGGACAATATGAGAACGTTAGAGCATTATTTGAGCGAC  
ATTATGCGGGCTGGTACAGCAGATACTCCGGAACACGTGAAAG

>novel\_circ\_001017

GCGGCGCTGTCACCTCTAAAGATGTCAGAGCTCCGAATCGATTGTTCCGAACCTA  
TTCGAAACATTAAGACGCCTACACCAGAAACAGCAGAATACTCGGACAAGATGTCAAT  
GACGGGAAGCTTAATGGGTTACGAGAACAATAACGAGATAAATCAAGCAAAGTGTAAG  
AAGCCGTTAAAACCGCTTCCGATAGTGTCTAGCATAAATTCAGTGGTATTACAACAGC  
CAACAAAACGAAAAAACCCCGAAGATCGGCCAGACGCAGCTCTTGTATACGAGGTCA  
CGTGAATAGTTTGTGGTCCGTCTGGTACGGTGTGTTTGGCGGTCGCTTTTCAAGCTTACA  
TCGGGTAAAGATACGCGAAAAGGTTTCGCCGCGTATTTATCGTTACCTTGGCCTGCGGAC  
GCTCCACCGCCAAAGGTGGAGTTGTACGCGTGCTTGGTGCTGGCCGGTGTGAGTCG  
TTTTGCTGCCCGTTCTTCTCGGCGCGGCATTTTAAAGCTCGGCAACCTGGCGAACGAT

GGGGTGAAACTTGGCCGCCATTTGAGCGCGTGTTTCGCGCGATCCGCCTTCGTCCCTGC  
TCACCAACAATCCCGACCACAGTTTGGCAAACAATTTATGGCGGCACGGGGGTCCCAC  
GGCCGCTTTCGTGCACCTTTGTACAGCCATGTGCTTCCTCCTACCCTCGCTTCTCATGG  
AGGCTAGGCTGATACACGCTGGATTTTTTGCCAAAAG

>novel\_circ\_001019

GCAGCGTGATATTTGCGAAGAGACAGCACCTCTCGAGGTGCTCGCGGTCAAAGTGGAT  
TACATGGAGGAAACGAACATGATGGACTCGGTGCCGGTTTCTGCGTCAGGGTCAAAGA  
CCGGGTTGCAACCACAGCAGGGGGTACCATACGATCTTGAGAGTGGGTTCGAGCCTCA  
GACCAGAGCACGATCGCACACGTGGCCGCTGCCAAGTCCGGAGGAATATATCGAGGG  
AAACAAGAAGCCGAACGTATCGGTTTCGAAAAGAGGGCGTCGAAGATGTCGAAAGTGG  
CACGCCGCCTCAACATGGTTCTCTCGGCCAAGGTACCGGCTTGCTTCCGGTCAAGAAG  
AATTCCTCCCGACGGAATGCCTGGGGAAATCACAGTTATGCAGATCTCATTACTCAAGC  
CATTACCAGTGCTCCAGATGAACGGTTGACTTTGTCTCAGATCTACGAATGGATGATGC  
AGAATATTCCATATTTTCAGGGAGAAGGGAGAAAGCAACAGTAGCGCCGGATGGAAG

>novel\_circ\_001020

GTGAGTCTGGTTTTTTCATTATCATCGACGAATAGATCATAAATCTAACTAATTAAATTATA  
TTTACTCTTTAAAAAGATAAAATTAGGTAAGTTACAATTATCTATAATTAAATAAGTATTT  
AAGATGAATCTTTTTTGTTCGAAAGTTCTCGTAAAAAGGTAGAAATTACGGTGAAATA  
GTCGAGACAGTAACAAATGAAGTAAAGTTAGCATCGTGATCTGCTTAGTTGATAAGCC  
AGAACGACTAGTAATTGCGTTCTTCAATTTAACGATCGTCTGCTACTTGGATAAAAATC  
ACACGCGCGTTGTTACAGGTTGCAACACAGACGTGGTTAAGCTGTTAATGGCGTTTCA  
TTAAGTATTTAGCATACTAATAGGCTCCTCCTAAAAACACGTGATAAAAGGTTATTTTTA  
TAAAATTCAAATTCCTTATCTTTTTCTTATCATTTTATTCAAATTTTTTCGACATTTTTTCT  
TTTAAGTAAGAAGTAAAAATAATGAAGAATGTTATTTTCAGTTTGCACATATCAATATATT  
CGAAACCTGAAGCCATTTCTTTTCGTCTATCTGATAAAGAAAAAGTTAATGTATCGAATAA  
ATGTATCGTTACATTTTCATTCACGTTTTTCTCAAGTCTTTTTTGCTTCGGTATCTGCTGAG  
AGACTCAGTTAATCAAACGTTTCGTAGATCATCGATTATTGCAGTGTACCATTGAAACT  
CGTCAATTAGAAATGTATCGCACGATTAGAACTTTTTTTTAAATCGAACTTCGCAAGAA  
TTTAATAGTCTTTTCAAAAAGAAAAATTGGCATGAAAGTTCTTTCTACAGAATTCTTTTA  
ACTTCTCCTAGTTATGGCAATTTATGTGTGGTAGAATTTGGATATAAGAATCGAGATATT  
TACAATAATTGAGGTAATCAATCAACTATATAAATTTCTTATTATCATATTTCTTATACTA  
AAACTACTGAAGTTTTAGAAAGTAGAGTCTATAATTTTCTTCTATGGCTTCTTATCGTGT  
TCATATTCATAGTTAATTATAAGTTATCTACTCTACATTAACGATATGCAATGAAAGAGAT  
TCGTATGTCAAATAAGTAAATCAAAAATGTAGCTATCGAAATTTGATTGTAATAGAATA  
CTCAATAATTTGTATTATATTCAAATATCTGAATATTTATTAATCTTTAAATGTGAGATAT  
TCTCAAAACCAGTATCTTGAAATTTATATAATAAATTAACAAACCAATTAATACAATGTA  
AATTCTAATTAGAAAATCTATTATTCAAATTATAATTATTCAAATTATATTTTATTGTTATAT  
ATTTATATTAATTTAAATTTCTACAATAAATAATAAATAAGAAAAAAGACTTCAATAAC  
GATGCTTTTATCTTTTAAAACATTTATAATATTAAAAAAAGACCGAAATAGTTTGAAAAA  
TAATGTATTGATAAATTTATGTGATCTAATAAATAAATTAATTCATAAATAATTAAAATAT  
TTTATAATATTTTATATCATATAAAATAAAAATCAATTGATATTGCATTAATCTTTTTGAAA  
TGCATGATAATATATGATAATGACGTATGATAAAAAAGGAATATTCCACAATATGAAAT

TTTTTTAACCGAATGAACAATCGTATTTCTCTATTATTTTGAATATTAAAGATTCCACTAT  
ATTGATTTAGTATTTGAATAACTCATTCGATTCATATGTCTGATTGAATTATAATTTAAATT  
TGCAATAAGACAATAAAAGAATTCTTAAATTCCTTATAAATTGTTCTTTGAGGTCTGTT  
AGTTCATGGCGACGAGGCAAATTTCAAGGACGTGAAACACGCAATAGTTAAAACTTCG  
TCGGACTGAGCACGGAAATGAATGGGAATCTTCTGAGAGAGGGTGATTGAAG

>novel\_circ\_001021

AACTCTATAAGGCACAACCTTATCGTTACATAGCAGATTTATGCGAGTGCAGAACGAGGG  
TACCGGAAAAAGTTCTTGGTGGATGATCAATCGTGATGCGAAACCAGGGAAATCACGT  
AGAAGAGCAATAACCATGGAGACGAGCAAATTTGAGAAACGACGTGGTAGGGTAAGG  
AAGAAGATCGAGGCGCTAAAAAACGGTGGGTTACAAGCTGACACGACAACCTAGCCCC  
AGTAACAGTGTGAATGAGGGGTTGGATCTCTTTCCAGACAGTCCGCTTCAGTCTGGCA  
GTGGATTTCAACTTTCACCTGATTTTCG

>novel\_circ\_001022

AACTCTATAAGGCACAACCTTATCGTTACATAGCAGATTTATGCGAGTGCAGAACGAGGG  
TACCGGAAAAAGTTCTTGGTGGATGATCAATCGTGATGCGAAACCAGGGAAATCACGT  
AGAAGAGCAATAACCATGGAGACGAGCAAATTTGAGAAACGACGTGGTAGGGTAAGG  
AAGAAGATCGAGGCGCTAAAAAACGGTGGGTTACAAGCTGACACGACAACCTAGCCCC  
AGTAACAGTGTGAATGAGGGGTTGGATCTCTTTCCAGACAGTCCGCTTCAGTCTGGCA  
GTGGATTTCAACTTTCACCTGATTTTCGTCCTCGAGCTTCGAGCAATGCCTCATCTGT  
GGTCGATTAAGTCCAATCACGGCGATTCTTAGGAAACCGGAATGGACACCAACATACA  
CACTCTCATATAGTCCAGAACAATTAGCTGGTAGCCTCGCAGAAACGATGAAATTGGAA  
TCCTATCAAATGTATCATACGACACAACCGAGCCACCAGCATCATACAGGACCACCACC  
TTCTTATTACGAATCCCAATATCAGAGGAGCAATAGCTTGTGTCGTCAGGATCGTCCTCCTT  
CGCTCTGCAGCCAACTCCTCAATCAGCAAATCAACAAAGATGCCCAATTCACGGTTTG  
CAACCGTGTGCCTGTCAAATGAATTTGAGTCCAGTGGCTGGAATGTCGCCATCGTACC  
AGCAAAGCGAACCAAGTCCCACAACGTTAGGAAATAATCAACAGCAAACCTCTCAATA  
CATGATGCAGACGCAACAATGTCAGCAGCAACAATTGCCACAACGACAACAGCAATC  
ACAAACAGGAGTAACAGATTCCAGTTCATCACAACATCTACCCCATGTGACCCCACA  
CCAAGCACTATGATGGGTCAATTGATGGGAGCCTTGAACAATTCAACACTTCTTGATGA  
TTTAAATATTAAACATCGAATCGCTGCATGGTGGATTTGATTGTAACGTAGAAGAGGTGAT  
CAAACACGAGTTGTGCGATGGATGGTACATTAGATTTCAACTTCCAACAGAGTGTAATGG  
GTACGGCTGCAATCCAAGTAAGCGACAATAATATCGGTCAGAACGGCGCCGTTTCGCA  
GAACAACGTGATAGGTACGACGACGACCGGAAACGCGACCGCAGGTGTTTACGTGAG  
CACCAATGCGGCCACTCCTGCTGCACCTCCCTCTTGGGTTCATTAGCAGTGGGCCCCAC  
TGCCCTCGACATCCTCGTCGTCCTTGTATCGATGGTACTAGACAGACAAGAAGACTTC  
CAGTTTGAGGGACAGTTCATTG

>novel\_circ\_001023

AAAGCACAAAGTTCGCATTGCGTAGGATGTGGTGGTTCGAATTCATGATCAATGGATTTTG  
CGAGTTGCACCGAATCTGGAATGGCACGCTGCTTGTTTGAAATGTGCAGAATGCCAGC  
AATTTTTGGATGAGCACTGCACCTGCTTCGTGCGAGATGGAAAACTTATTGCAAGCG  
AGATTATGTCAGAATTGATTTCACTGTTTGGGACAAAATGCGACAAGTGCAGTGAG

TGCTTTAGCAAGGATGACTACGTAATGAGGGCAAGGAGCAAGATTTATCACATAAAGT  
GCTTCCGATGTTTCAGCCTGCATGAGACAGTTAGTGCCTGGCGATGAATTTGCCTTGAGA  
CAGGATGGCCTGTTCTGCAGACATGATCACGACGTTCTCGAAGGCGGAAAGCTCTGCT  
CTGGACCTGGTGGTGGTTCCTGGAAGTGAACAACAACAATGCATCCCTTATGAATAAT  
AATCATCATCTGCATCCCAACGACGGCTCAATATCAG

>novel\_circ\_001026

GTACTGGTGAATCCGGCAAATCCACCTTCATCAAACAGATGAGAATCATCCACGGGTCT  
GGTACTCGGATGATGACAAGAGGGGGTTCATTAACTCGTGTACCAAAACATTTTCAT  
GGCCATGCAGTCCATGATCCGAGCGATGGACCTCCTCAAGATCCAGTACACCGAATCTT  
CGAATATAGAAAAAGCAGAACTCGTGCGAAGCGTGGACTTCGAAACTGTTACAACGTT  
TGAAAGCCCATACGTAGAGGCAATTAAAGATTTATGGGCAGACGGTGGTATCCAGGAG  
TGTTATGACCGCAGGCGAGAATATCAGCTCACAGATTCCGCTAAATATTACCTATTGGA  
GATAGATCGAGTCGCAGCACCGGACTACCTCCCAACAGAACAGGACATTCTTCGCGTG  
AGAGTACCCACTACTGGTATAATTGAATATCCATTTGACTTGGAAGAAATTCGATTTAGT  
TATCTTAGTGACCTAGACCGTATTGAAAAGCCTGACTTCCTTCCTACTGAACAAGACAT  
TCTTCGGGCTCGAGCTCCTACTACTGGCATTATAGAATATCCGTTTGATCTGGACTCCAT  
CATATTTAGGATGGTAGACGTCGGTGGACAGAGATCAGAAAGAAGGAAGTGGATTTCAT  
TGTTTCGAAAATGTTACTTCTATTATCTTTTTAGTAGCTTTAAGTGAATATGATCAAATTT  
TGTTTGAGTCAGAAAATGAGAATCGAATGGAAGAAAGTAAGGCATTGTTCAAAACAAT  
TATTACATATCCTTGTTCCAACAGTCCTCTGTTATTCTTTTCCTAAACAAGAAAGATTT  
GCTAGAAGAGAAGATTATGTATTCTCATCTTGTTGACTATTTCCCGGAATATAATG

>novel\_circ\_001027

TTATCTTAGTGACCTAGACCGTATTGAAAAGCCTGACTTCCTTCCTACTGAACAAGACA  
TTCTTCGGGCTCGAGCTCCTACTACTGGCATTATAGAATATCCGTTTGATCTGGACTCCA  
TCATATTTAGGATGGTAGACGTCGGTGGACAGAGATCAGAAAGAAGGAAGTGGATTCA  
TTGTTTCGAAAATGTTACTTCTATTATCTTTTTAGTAGCTTTAAGTGAATATGATCAAATT  
TTGTTTGAGTCAGAAAATGAGAATCGAATGGAAGAAAGTAAGGCATTGTTCAAAACAA  
TTATTACATATCCTTGTTCCAACAGTCCTCTGTTATTCTTTTCCTAAACAAGAAAGATT  
TGCTAGAAGAGAAGATTATGTATTCTCATCTTGTTGACTATTTCCCGGAATATAATGGCC  
CTAAACAGCAAGCTGTACCAGCCAGGGAATTCATCTTACAGGTGTATCTTAGTTCGAAT  
CCTGATCCTGACCGCATGTGCTACTCTCACTTCACGTGTGCGACAGGCCACAAAGAG  
ATGCCATACCTGCTAGAGAATTCATTTTACAGATGTTTGTGCACTTGAATCCTGATATTG  
AGAAGATTATATATTCACATTTTACATGTGCCACAG

>novel\_circ\_001028

GATGGTAGACGTCGGTGGACAGAGATCAGAAAGAAGGAAGTGGATTTCATTGTTTCGA  
AAATGTTACTTCTATTATCTTTTTAGTAGCTTTAAGTGAATATGATCAAATTTTGTTTGAG  
TCAGAAAATGAGAATCGAATGGAAGAAAGTAAGGCATTGTTCAAAACAATTATTACATA  
TCCTTGTTCCAACAGTCCTCTGTTATTCTTTTCCTAAACAAGAAAGATTTGCTAGAAG  
AGAAGATTATGTATTCTCATCTTGTTGACTATTTCCCGGAATATAATGGCCCTAAACAGC  
AAGCTGTACCAGCCAGGGAATTCATCTTACAGGTGTATCTTAGTTCGAATCCTGATCCT  
GACCGCATGTGCTACTCTCACTTCACGTGTGCGACAGGCCACAAAGAGATGCCATAC

CTGCTAGAGAATTCATTTTACAGATGTTTGTCTGACTTGAATCCTGATATTGAGAAGATTA  
TATATTCACATTTTACATGTGCCACAG

>novel\_circ\_001029

GCCCAGCACCATGGCGGCTGAGGAGGGTGCGCTGAGTGGCGGACTCGGGGCGAAATT  
AAAATGTCCGACCCCTATATCACGCTTGAGGGTGGAGAAGATCGAGGGCGGCCTGATG  
GTGGCTGGGGTTGTAATAGCTGCGAACTGCCAGATTGCTCTTCCGGCATTTCGGCTTCCT  
CTTTATGCTCGTCGGCGCTGTACTCACCGGTGATCGAACTCGACGATGGCAATGGAGC  
GTTTATGTCACGAAGAGGAAAAAGAAGAAAAAGGAAGAAGAAGAAGAGGAGGAGG  
GGGAAGGAGGAGGAGAGAGAGGAAGAAGAGGTGGCGTGGAAGAAGAAGAAACGAG  
GGAAGAAAGAAGGTTCACTAACGGGCAACAGCTGGCCGTTTACTCGTTTGGCCACGG  
TTTCTTGGATACAGGTCTGGACCGTTGTTACCAACCGATTTATCAAAACCG

>novel\_circ\_001030

GTGATGAACCAGGAAGTCAAAAAAGAGACTCCGTTGCAATTCAAATTCGCGCCAAAT  
TTTATCCCGAAGATGTTGCCGAGGAATTAATTCAAGATATCACCTTGCGTCTTTTTTATC  
TTCAGGTGAAAAATGCTATTCTTACGGATGAAATTTATTGTCCTCCGGAAACATCTGTAT  
TATTAGCCTCTTATGCAGTTCAAGCGAAACACGGAGATTTTCAAAAAGGTACGCATACT  
GCTGGTTTTTTGATAAATGATCGATTATTGCCACAACGAGTTGTGGATCAACATAAAATG  
AGCAAAGAAGAATGGGAAAGTTCGATTACTAATTGGTGGCAAGAACATCGTGGAATGT  
TACGTGAAGATGCAATGATGGAGTATTTAAAAATCGCTCAAGATTTGGAATGTATGGA  
GTAAACTATTTTGAAATTCGTAACAAAAAGGGTACAGATCTATGGTTAGGTGTTGATGC  
TTTGGGTTTGAATATATACGAGAAAGATGACAAATTGACACCAAAAAATCGGTTTTCCAT  
GGTCTGAGATAAGAAATATTTCAATTAATGAAAAAAAATTTATAATCAAGCCAATTGATA  
AAAAGGCACCAGATTTTGTCTTTTTTGCCACTAGAGTTAAAATAAACAAGCGAATTTTG  
GCATTATGTATGGGCAATCATGAACTTTACATGCGTCGACGTAAACCGGATACAATTGA  
CGTACAGCAGATGAAAGCGCAAGCAAGAGAAGAGAAAATTGCCAACAGCAACAAA  
GAGAAAAGTTACAATTAGAGATAGCAGCAAGAGAACGTGCGGAGAGGAAACAGCAA  
GAATATGAAGAAAGGCTTCGAAATATGGCGGAAGAAATGGATAGGCGGCAAGCTGAGT  
TAAATGAAGCTCAAGAAATGATTCGACGTTTAGAAGAACATCTTAAACAATTACAAGC  
TGCTAAAGAAGAATTAGAAGATCGCCAGAAAGAACTTACGGCTATGATGGAAAACTT  
GAACTTTCACATGAAATGGAAGCTGCTGAACGTGCTAAACTTGAACAAGAAATACGAG  
CCAAACAAGAAGAAATACAACGTATACAGTCTGAAGTAGTAGCAAAAGATGCAGAAG  
CAAGGAGATTGGAAGAAGTATTTGAAGCTGCCAATTAAGACAAGAAGAAGCTGATC  
GAGCATTTCAAGCTAATACAACACCCCATCATCATCACGTTGAAGAAAATGAAGAAGG  
TGAAGAAGAAGGAGAAGATGAAGTTTCTCATGGTGATGTTACTAAAGATCTTGCAACT  
GATGAATCAATAATTGATCCAGTCGAAGAGCGACGTACCTTGGCAGAAAGAAATGAAC  
GTCTTCATGATCAACTTAAGGCATTGAAGAAAGATCTTGACAAATCACGTGATGAATCG  
AAAGAAACCGTTATGGATAAAATTCATAAGGAAAATGTAAACAAGGTCGTGATAAATA  
CAAAACGCTTCGTGAGATTCGCAAAGGCAATACTAAGCGCCGTGTTGATCAATTTGAG  
AACAT

>novel\_circ\_001031

ATGTTATTGTTGTGCACTATCTCTTTCTCCACAATCAGCTTTACTATGGCATGATTTAGCT

TTGTGCTACTTAATGCAACTACAATATGATCCATCAATTAATCATAAAAAATCTTGCTAGTA  
AAAGTCTTGCTGCTGCAAAACATGCTATTAAATTAAATCCTTCAATATGGATACATTGGA  
ATCTCTTAGGAGTTATTTGTATGTCACCATATATAAAAACTTTGCATTAGCACAAACATG  
CTTATATCATGGCAATTGATACAGAAATAAATAATGCCATAGTATGGTGTAATTTGGGAA  
CATTGTATCTATATACAGAAAATTTATATAAAGCAAATGAAGCTTATTCTCGAGCTCAGC  
GTGCAGATCCAGCATACATAAATAGTTGGATAGGACAGGCTTTAATTGCCGAAATGATG  
CATCGAAAAGAAGCAATGGATTTATTTAGACATGCAACACAATTAGGATATCACAGTCA  
AGCTGCCATAGGATATACTCATTGGGTACTTGATATGATTTTAAATTCTGATACCAAAAA  
GAACAGTTTAAATATATGTGTTACAGAAAATGCTGTATTTGCTGCTACTGATGTTATGAC  
ATGGTATATAGAAAATCATCCAAATGATTGTTATGCTCGAAATGCATATGGATTACTATTA  
CAAAGACAAAACTTTATAAATCAGCTGCAGAACAAATTTGCAGTAGCTGTATGTAATAG  
TATTAATAATAAAAAAGATCTAGTCTGTGTAAATTTAGCACATGTATTAATAAACTTAA  
AAAATATAATGAAGCTATAAAATTATGTCAAACAGTTCAAAATATCAATTATAATTCTCA  
ATGTCATTTAGCATTGGCTTTATTCAAAGCTGCAAAATATGAAGAAGCATATACCACATA  
TGAAACAACACTGCAATTTTTGGCGAATACAGAAATAGAGAAATCATATGCACTGTGC  
GCAATGGGTGCAATAGCATATACTTTTCAAAAAGTAAATGATGCAAAAACCTTTACTTTT  
TCAATGCATACAAATACAACCGCCTGTTATAACTGGCCTTTTAGCAGCTGCATCATTAGG  
AATATTACATGGTGATATCAATTTAACTACATTGGTATTAAATGAATTGCAATTATATGAA  
AATCATCTTGAATATGGTTATCATGTTGTGAATTTATCTGCATATTTTTATTTAATTGGAAA  
TGATGTTAAAAAAGCTATTACTATTCTTTCTAAAGCAATTTTTACACATCCTAGTAATGTA  
AAAAATTGGATTTCGATTACTCAGGATATTATTGGAACTAATGTACATATGTTTAGCAAA  
TGTGCTCAGAAAGTATTGTTCTTAATAAATATATTACTTCTGAAAATCATGCAAATGTT  
GCATGTGCTCTATCTTATAGTTATTTTATGCAAAATTTAGTACCAGCCAATATTATAGCTAT  
GCAAAAACCTTGTTTTCACTTATCCTGGTAATATTGAAAGCTGGGCTATGTTTATTGCAGT  
ATTTTTATCAAG

>novel\_circ\_001032

AATGTCGGAAGCCGAGGATGCCTCCTCGGGCAAAGGCAGTAACCTGACAGCGGTGGA  
GGCGATCTCGGCGAGGTTGGCGGAAGTAACTCGTCTCGCCGAGAAGTTGGACGCGAA  
ACTTTGCGAGGCTGGCGCCAGGACTCGTCCAGTCCCGATGTCTCGTCCGCCGTCTCC  
TCCACCCCCCTCCCCCTCTCGTCCTCGAGCGCGCCCCCACTTCCGCCTCGGGTCAAAT  
CCACACGATTTCCGCTGTCACAACCTTCGTTCGATCGGGATCACAGCACCGTTGATCAGCT  
CCTCGACGGTGCAGCTTCAGCCCAAATGCGTGTCCACGATACTCTCCTCGGCGACGAG  
CAACGAGAACGTTGGCACGACGACCAAGATTTCGGCGCAGAGTGTGAATGGCACGGG  
AGTTGGTGATGAAAAGGTGGAGAGCAAGGTGGAGGATGAGGGGGAGGCTGGAACAG  
GGGAAGAGAATAGACAGGATGATTTGAGCGGGATGAATGATGAGAAGTTGAAGGGAG  
AAGTTGTGGAGGACGTGATCGAAAAGTCATTCGACGATAATCTAGCCGAAGATTTCGAA  
CATGGACGAATACGTAACCTGCGACTGAATGTTCAATCACTCCGACAGTTTCGTTTCGAGG  
AGCGAATCTTTTCGTTACGTCTCCAGAATGGGAAGATCTCGCTGCTCCAACATCCGTGAC  
ACATACTTGTGCGATACTGGGTGGAACATCGAAGAACTAAGCTTAAACGGACGGAA  
AGTTTGGAACGGAGAGAAAATCGACGCTTCGATGGATATTCAAAACCGGAAGTCGAG  
GGGACGGAGAACGAGGGAAAACAGAGTGAGAAGCTCGTGTTCGATGGAAAAAAGAGT  
CGAAGAGAAAATCCGGGAAGATAGTGAAAGAAGTTACGGAAACGACGACTTTACGAGT  
GTCTCACGATACTCGTTTAGATATTGCGTCTTACAAGGTGATATCCAACACCACGCAAG

ATCATCGAGAAAACGTAGATGTTAAGGAAATCAAGGATCTCGAACGCATCGTGTTGCC  
GGATGTCCACGAGAAAACGAATGGATCGCACTACGAGATGGATTCCGTTAGCAAATCG  
GAGTCGTACAGTCGCAGAGACGAATTGTCCACGAAAACGGACGACATCGAGCGCGTG  
GTAAATTCGCGAAGATCTGCGAAATAAATCAAGAATCGCGCACGATCTCTGTCGATAC  
ATCGGCGAAGGATATCGCTCTGTCTTGAAGGAATACAGGCGACGTCACGAGGACAGT  
GGGATCGAGATGTCGCCGACGAAGAAAGACGAAAACCTCGAGGGCCAAGATTTCTC  
GAAGCGGCGAGGAAG

>novel\_circ\_001034

GAGTACCTTCGCCATTTTATGGAACGTACAGGGACCAAAACATCAACGAGAGGGCTAT  
GGAGAGCCCCGCCAGGTACGTGGCTCTCAAAGACCTATTTCTTCCGCAAGAGAACGAC  
GTGAAATCGATACCTGCGGATCGTCAACATTCTACGCGACACGATTACTCGGTCCCGTG  
GAATTTGAACGCGGATCCCAGTTGCGCAGGTGGCGGCTATCGCGAGAGGCGAATTACG  
ACGGAAGAATGCGAGGAGATAACGGATCGAAATACGATAGCGCGGCGACTCGGGTATT  
CCGATTTTCGAGGCGAACGATTCGTTTCGCGATGATTTCTGCTTCGATCGCGAGTATTGC  
CGTCCGCGAGGCCGAGGACGGAGGACGGAG

>novel\_circ\_001036

GGCAATCAGATATTTAAACGGTGTTCGTTCGATTTTTCCAAGGAGAACAGCTGAAGA  
GCCGAATAAGAAAAGTGTGCACCGGTTTCCACGCCTCTTTGTATCCATGCCCGCATAGC  
CACGCGGAACGTCAAGAAATGGTCAAAGGCGTTTGAACGAGACTGGAAGATTTGAAC  
TTGGTTTTGAATCAAACGCACGATCACCGCCAACGCGTTTTACACAACGTGGCCAAGG  
AATTGCCGAATTGGGCGATCATGGTTTCGAAAGATGAAGGCGATTTATCACACGATGAAT  
CTGTTCAACGTTGACGTAACGAAAAAGTGCCTTATAGGGGAGTGTTGGGTACCTGTATC  
GGATCTTACCATCGTCAGAGACTGCCTTAACGAAGGATCGCGTCTCTGCGGTAGCTCGA  
TACCATCTTTCTCAATGTCATCTACACGAACGAAAACCCGCCGACGTTTAACAGGACG  
AACAAGTTCACCAGAGGTTTTTCAAACCTTGATCGACGCGTATGGCGTGGCGTCGTACC  
GCGAGGCTAATCCAGCCCTTTATACGATTATCACCTTCCCCCTTTCTATTACGATCATGTT  
CGGCGATTTTGGACATGGTATAATTATGACTCTGTTTCGCTCTGTTTATGATCGTGAAGGA  
GAAGAAGTTTATGGCTGAAAAACAACGAACGAAATTTGGAATATATTTTTTCGCCGGC  
CGTTACATTATTCTTCTCATGGGTTTGTTCATTTACACTGGCATCATCTATAATGACG  
TATTCTCAAGATCAATAAACATATTCGGGTCTAGTTGGGACATACGGTTCGACAATAAA  
ACAATCATGATTAATGAGCTTATGGAATTGGACCCGGCTAAAAATGATTACAAACAATA  
CCCTTATCCGTTGGGTATGGATCCAGTTTGGGTGCTTGCCGAGAACAAGATCATATTCTT  
GAATTCGTACAAAATGAAGCTGTCCATCATCTTCGGCGTCGTCCATATGATATTCGGCGT  
GTTATGAGTACCATTAATATTAT

>novel\_circ\_001037

GGCAATCAGATATTTAAACGGTGTTCGTTCGATTTTTCCAAGGAGAACAGCTGAAGA  
GCCGAATAAGAAAAGTGTGCACCGGTTTCCACGCCTCTTTGTATCCATGCCCGCATAGC  
CACGCGGAACGTCAAGAAATGGTCAAAGGCGTTTGAACGAGACTGGAAGATTTGAAC  
TTGGTTTTGAATCAAACGCACGATCACCGCCAACGCGTTTTACACAACGTGGCCAAGG  
AATTGCCGAATTGGGCGATCATGGTTTCGAAAGATGAAGGCGATTTATCACACGATGAAT  
CTGTTCAACGTTGACGTAACGAAAAAGTGCCTTATAGGGGAGTGTTGGGTACCTGTATC

GGATCTTACCATCGTCAGAGACTGCCTTAACGAAGGATCGCGTCTCTGCGGTAGCTCGA  
TACCATCTTTCTCAATGTCATCTACACGAACGAAAACCCGCCGACGTTTAAACAGGACG  
AACAAGTTCACCAGAGGTTTTCAAACTTGATCGACGCGTATGGCGTGGCGTCGTACC  
GCGAGGCTAATCCAGCCCTTTATACGATTATCACCTTCCCCTTTCTATTACGCATCATGTT  
CGGCGATTTTGGACATGGTATAATTATGACTCTGTTCGCTCTGTTTATGATCGTGAAGGA  
GAAGAAGTTTATGGCTGAAAAACAACGAACGAAATTTGGAATATATTTTTCGCCGGC  
CGTTACATTATTCTTCTCATGGGTTTGTTCATTTACACTGGCATCATCTATAATGACG  
TATTCTCAAGATCAATAAACATATTCGGGTCTAGTTGGGACATACGGTTCGACAATAAA  
ACAATCATGATTAATGAGCTTATGGAATTGGACCCGGCTAAAAATGATTACAAACAATA  
CCCTTATCCGTTGGGTATGGATCCAGTTTGGGTGCTTGCCGAGAACAAGATCATATTCTT  
GAATTCGTACAAAATGAAGCTGTCCATCATCTTCGGCGTCGTCCATATGATATTCGGCGT  
GTTTCATGAGTACCATTAATATTATACATTTCAAGAAATACTCGAGCCTTTTCTTAGAATTC  
TTGCCACAACCTGCTTTTCTTGTGATTATTTCTCTACCTGGTAGTCTTAATGTTTGTTA  
AATGGGTTTTATATAGCCCCACCTCGCCAGACATGGCGTATACTCCTGGCTGTGCACCAT  
CGATATTGATCACGTTTATTAATATGATACTGCGGGGTCACAGCCAAGTGCGCGAAGGT  
TGTTTCAGAGTACATGTTTCCGGGCCAGACCACTATTACGCTTGCTTGCGTCATAATCGC  
AGCCCTATGCGTGCCCGTCATGCTGTTTGGGAAACCGCTTTTTTTCTTATTGCACAAAA  
AGAACGCACAGCCGGGAAAAAGTCCTGAGCGATGGGATCGCGTCCCAAGATATTGAATT  
GCAAGCTAAAGGGTTGCAAAACAACCCGTCGACCAGCGACGCAACCGATGAACACGA  
GGACGAGTCGTTTCGGTGAAGTAATGATACACCAGGCGATTACACTATAGAGTACGTTT  
TCTCAACGATATCACACACTGCCTCTTACCTACGTTTGTGGGCTTTGTGCTTGGCCAC  
GGACAACCTTTCCGAAGTTTTGTGGTCGATGGTGCTGCGCAAGGGTTTACTCGCTGCCG  
AGGGTAATTACGTGTGCGCCATCATGTTATTCTTCGTGTTTCGCCGCATGGGCCCTTTTCA  
CCGTTGCCATTCTTGTCATGATGGAAGGCCTGTCTGCCTTCCTTCACACACTTCGACTT  
CACTG

>novel\_circ\_001038

CGATACGTGACCTCACTTTTAAACGCCGATATACAACAAGCTTGGATTTAAGGATAAATC  
GAAAGATGATCATGTACGTTGTTGTTTCAGATCGCACGTTTCGCAAATGGGCGTGCAAA  
TTCAACGTAACGGATTGCAAGGAGCAAGCTTTATCTCACTTCGATGCTTCAAACAACG  
GTGCAACACTTGAAGCTAATATTCGTAGCGTATCTTACTGCACGGTCGCCGAACAGAAT  
GACAGGCAATTGTGGAATCGTTTATGGGAACTTTACACACAATCGACATTTTCAGCGGT  
AAAATCAGTAATTCTTCAATCTCTACCCTGCGCCACCGAAGATGTCCTCCTCAAAGATC  
TGCTCCAAAAGGCGATTACGAAGGATTTCGGGAATACGATTCTGAAGATCGTTTCGAGCGT  
GTTCACTTCCGTTATCAATTCGAGCCCGGAAGGGGTTGAAAGCGTGATAGATTTTCGTTT  
GAGAAAATTATGACAAAATTTACGAGCAAGTCTCCAACGTGAACGGTATAGTGAATGC  
AATTGGAAAGAAGGTGTTACAAACGAGCTTTACGCAAAG

>novel\_circ\_001039

GTATTCGTCAGCCATTTTGGAAATTTTGAAGCGTCAAAATGTGCGACATCATTCGAA  
TAACCGCTCCAGCTGTAAAGAATATTACGAATTGTTGACGATTTCTAGTATTTAGTTTTT  
AATCAAAGCTTCTGGATGAAGCAATTATTAATTTTGTCTGACACGTTTTTATCGAATTTG  
TTTTTGTGTTATGAATATATATTAACATTAGAAATTGGCAATTTCTAAATATATGCATGAATAT  
TTATATACGAGTAGCATATTATTTTTTCCAAAAATATCTGTATCCTTTTTTATAATAGAACG



AAAAATTCGTCATTTTCGACTGTTTCACGGTTAAATATCTTTTTTAACCTTTAAAAGAAAA  
ATTGATTATTGATCGTTGCACAGAGAATTTGGATTTTATAAAATATAAAAATCTGAATGA  
TAAAAAATTGTAATAACAAATTATAACTATAAGCATTTTCTTCAACAACCTATGGAAGTAC  
GGAATTTTTTAAATGCAAGAAATACGCGAAATACATTTTAAATTTTCATTATTGACTCTT  
TCTTCGATTTTTTTCCTATAAAAATTATTTTACTTATCGCAATAACTTAAAGTTCTTTTCCTT  
TCTAAATCTTGAAAATTTTACTTTTCAAAGTTTTATTCCAAAGCAAAATCATCGAGACA  
GAAATTAGTCTCCTTTTATCAATTATTATCGTGCCTGTAACGTGTTTAAGTAGTCCACTTA  
TTACATTGGCATAAAATCTTTTTCATCTTTATCATTCTTATTAATAATAACGTTATTAAAC  
ATTTTACGTAACGCAATAAAATCTACTTTCATAAATCTCGAATTAAGAAAGATTAAATTA  
TTATCTTTCGAATCACTTCTAACTAAATTTTTTCATTTATCAAACGTTCTTTTAATTTATAAT  
TATCGATAGATATTATTTAAGTCGTTTCGTCCTTTTTTCATTCCAAATTATTAAATTATTAAAAA  
TATATATTTAAAATGATTAAAAGAGAAAGATTAAAAGAAAAAGAGAAAGACACGATCG  
TGATATTTTTTCTATCGATTCAACGATTCTATCCTCTGTTATTCTTCTAGAATAATAAATA  
GATCTATGAAACAATAACTCTCGACTTTTCGTCGTCCTGATAATTTTAGTTTCAAGATTA  
AATGTATTAACCGACTGATAAGATATGTTACATATTATCTCGTAACGTTGATCAATAAATA  
TAAATTATTGGAAATTAATAACGTGTTTGTTACATATATATTTTTTCTTCTTTTTTTTAT  
CTGATGCTAAAACCAATGACTCGTACCTTTGTCTCAATATCTCTCGTGATTATAACGTATA  
TACGTAGAAATATTCTTTTTTTATTTTTCGAAAATAAAAAAATCTTTTTTCAAAGACCTCGA  
CAATTTTCTCCTTCCTTACTTAATGAAAATTTCAAGTATTTTGAAGAACTGTTTTTGCAT  
GTGCATCCATTAAAATAAAATGTAACGAAATGATGATGACAAGGATGAAGAATAAAATA  
AGAGCAATCAAAAAGTTTGATTTTCATTGGTTCGAGATAAAATTCCAATATTGATCTCGAT  
CGACTTACGAGCTAAACGCGTAGCAAGTACTTCCCTGCTGATTAATTTTTTACCCGTCGA  
AAATAAATTTTAATCACTCTTATAAAATTATTACGTATCGTTTCATCACTCACACTTCTGA  
TACGCGATATTGTCGAACAATTTGCTGATTTCTGCGGGCGTGGTCGCGTCCTGGTTCAT  
GGGTCGTGTGTTTAAACCCGCATCCGTAACGAAAGCGACCCCCCTGC

>novel\_circ\_001042

ACGGAAATGTGAGGCCGACGTAAAGGAGGCGAAGGCGGAGCTGGCGCAACGCAATAT  
GTTCCCTAGCGCTCAAATTAATGAGTATCTTTGTCAGATTGCTGTCGCCAAGCAGTT  
CGCCGGCCACGTGCGCCACAATGTCCAATTCTTCGTACCCGACGCCACCGACTCCGGC  
CGCAGCATCCTACAACCAGAAGATGACCGGGATACCATGCGTTGCGGCCGCTTCCAGA  
TACACGGCTCCGGTCCACATCGACGTAGGCGGAACGATATACACCTCCTCCCTCGAAA  
CTCTGACCAA

>novel\_circ\_001043

GGTACAAATTAAATATAAGATTTGAAGCCATAAGTGTAGTGTGTGATATTGGTAAACAAT  
TTGAAACAATTTTGAACCTATATTTATAGTTCAAATATAAAATGTCTTGATATTAATGCTTT  
AAATATTTAAAATTACTAAAAAAATATATGTCAAATGTTATATTGGGATAATACAAAATA  
TACCACATATATATAAAGTGACAGAATTGTTTTATATATTCAATTTTAAATGTTATGTCATG  
GAAAAATGTAGTTCAATTGTATTTATACATGGATGTAATTTTGCAACAGATGTGCTTTAA  
GGATAAGTCAAAATACTTTCAAATGCAATTGTTCAATTATTCTTTAATGGATAATGTAG  
TTCGAAAAAGAACTACCTATTATATACAAGAAATCAATATTCAAACATGGTTAATATCAG  
AGTGTGATATTGAATATAAACATCAACATCCCAAATAGATTTATTTCAAAAAGATTAAAA  
GATACCTAAATAACAGATGAAATAAGAAGTTACATGCATGACAGGAATAGGAGACGTA

GGTCGCAGACGCGTTGAATGGCGCCGTAGCGCAAATACAATCTCCTATCATCATTAAGT  
TATAATTCATGAGTGGAGTATATAGAAGCGAATATAGATAAACTGAAAAGGTGGCTAGA  
CGCTGCCCAGAGTAAAGAGGGGCTGCGTGGGCATGCAGCAGCCTCAGTCACGCCCTC  
TTCTCGGGGACTCAGTATCCTCTACAACCTTCCCCGACTGCTCGGCGTAATAATCCTGTT  
GCTGTTTTGACACATCAACAATTACAACAGTTACAACAACCTGCAGGCTCAAAATTCGA  
GTGGTCAATCATTAACATTTGCTTTACAACAAACATCAAATAATCCACAAGACCAAGGA  
AATGGGTCAACGACTGGAAATCACATAGTATATGTAAATCAATTAAACCATTAAATCA  
AGGTACCATAAATCCCTCTGGGACTGGTATGGGCCTACCCCCGGCCACCCCCACTTTTCG  
GGGTGGGCCTTAATATGGGATTGCCACTATCACTTTTAAATACCAGCCTTACATCCCTTA  
CATCTAATGTTATCACTACATCAAATCCTCTGCTCAATTTGGGCCTGCCAAATATAAATA  
CAGGACTAACTACAATAAATCCTAGCCTTAATCACTTAAATACCATAAATTCAAATTTAA  
CTTCAAATATTGGTTCAAACAGTATTAATAATGGTTTATCTGGTTTGGGACAGGATATAA  
ATAATATAAATACTGGAATTAATAGACTCAATACATTAAATTCAACAAATATAAATTCTGG  
ATTACCCAGTGTAATACTGGAATTACCAATGTAAATCAGAATTTGACAAGTTTAAATTC  
AAATATAAACCAGAATGTTACTAGTTTAAGCACAACTTTACATCTCCAGGTTCTGGAG  
TATCTGGTTTAACTACTATTAATCCAAATATAAATACAAATCTAACGACTACCAGTATAAA  
TCAAGGTCTTAATCGATCTATTAATGCTTTAACAACCTGGGTTGACTCAAACCTAGTCTGAA  
TTCCAGTAGTACACAATTTCCATTCCAAACCATACAAAGTATACAAAGCATTGCACCAC  
ATATTGTTGGATCAAATATTGCACATGTACCAAGTTCTGCAATATCGCAACATCCAAATT  
CAAACGTTTCTACCATTTCACAAATATCAAATACTGGTACTTTGACAAGTTCCAGTATAT  
TTACAAGTACTTCTAGTGAACCAATTCATTCAACTACAACAAATGTGAATCACACTTCA  
AACGTGAATCTTACTACAAATATTTACATCTTGGTACCATGCACTCAAATTTATCTAATA  
TATCAACATCTGTGCAGCATATATCTGCATCAAATGAACCGAATATGTCACTGAGTCATA  
CTTCTTCTCTAAATTCTTCTCAATCAACTGGATTTCAACCTCAGCGACAGTATTCACAG  
GGAATTAACCCTGGTTTAAAGTTCATCAGTAACATTAACGGGCTCGTCTCAGCCATCAA  
TGTGGTCAGTACAATAAATACTGTAAAATCTATGCAAAATATTCAAAGTCAAATATTAG  
TTCTCCAAGCAGTCCATTTTCAATACCATTAAAAAGTCCAGCATCTAATATTGCACCACC  
TACACCAAGTCCTAGTCCTAACAGACTATTACTTAGAAGTCCAGCATCAAATTCAATAC  
AATCTAGAAATAGTCCAAGTCCTGTTGGAACATCAACATCAAACAATAATTTAATATAC  
AAATGCAAAGTCCAATGCAGAGTCCAATGAGTGTTAGTCAAATACAGAGTCCTGTACT  
TAGTCCATATCCTCCTGCAAAAAGCCCTCATCTGTAAAGTGGAATAACTCTCTGAACA  
ATAGAAGTCCAGCACCTGGTGGGAGTCCTGGTCCACCTGTGGTTAGACCTAATACACC  
AATACTTCAACAAGGTATGCAAGTATTGCAATAATTCATGGTACACCACAGGGTTATC  
AATCAACGCCAACACAATTAGTAACTAGAACGCATTTAATTGGAAATCAACAAATTCAA  
ATAGCTGCAACTAAACCTGCAAAACAGCCACCACAAATTTTACCAAAACCTCCAAATC  
AACAACTGCTGGATCACAAACAAAACAGCAACGTGTTACTACTACAATTACAAATCA  
AGTAACACAACAACTCAACCACAATTGGTTCTTGCTGGACCACAACCAATCCTACT  
ACAGCTACAATGATACCAACAGCACAAGGTTTATTATTAAATCAG

>novel\_circ\_001044

GTGCTAAGTGAAGAAAGAGTTACTGGAAATGTAACAACAGAATTGCATACAAGTGGTG  
ATACACAAGGTCGTATTAGTTATGAAAATCGTGGAGAATGTTTTTTTCTGCCATATACAA  
AAGATGATGTTGAAGGAAATGTTACTTTGCGTGCTG

>novel\_circ\_001045

ACGGCATTCCTGACTGTGGCTCTCCTACCATTGAGACTAGCTGCAATTACGGCTCTGGT  
GATCATGGCCTGGCTTTTGGCTTGTCTAGGCCTCCTTGGATTGTCCGAGGAAGATCTTC  
GACGCGCACCTTTGACGGGGTGGAGACGAGACATGCGAATCGTGATCTGCTGGATGAT  
GCGAGCATTGTTTCATCTGCGGTGGATTTCATCACCTGAAGGTCAAAGGTCTGAGAGCA  
GAATCAAAGGATGCCCCCGTGTAGCCCTAGCCCCGCATTCAAGCTTCTTCGACGCACT  
TCCGTTGTTTACCTCGGCGGACCGAGCATCGTCGCCAAAGCGGAAATCGGGCGCATT  
CCTTTTTTCGGAA

>novel\_circ\_001046

GCGGATCTGCTTGGCCATTCTCTTTATGCGTTCATTATCCCAAAGATGAAGAGGAGCT  
TGCGAGGAACCTCAACCCGGATGAAATGCAAGGCGTGGTATCCTCGTTGCCACAGATC  
ACCGACGGAACGAACGACAATTCCAATTCATCGGAGGATTCAACGTCTTCGAAGAACG  
GGAAAACGTTCCAGAATCAGAGGCGGACTTTCGAACCTTCGAATGTTGCATCGTACTTC  
GTCGAGGCGGGAGCATAACAGTACGAATGGTTCGAGTTCTCTGGAATACTCAGGCTT  
GCGGACGCTTGCAAACTTCTACGTGCAATGTTAATCGATCGAGACATCGAGAAATTAC  
TTCAACAGTAACGACATCGTTTTCTGTTGGGTGTAGCACAATTATTGATGAAGCAGCCAC  
TCACGAAAATTTGATAATAGATGCTAATAAGAACGAGTATATCACTCGACATTTGGTAG  
ATGGCAGGATCATTTATTGTGATCACAGGGTGTGAGTTGTGGCTGGATATTTGTCGGAA  
GAAGTATCGGGTATGAGTGCTTTTGGTTTCATGCATAAAGATGATCGTATTTGGGCGATG  
GTTGCACTTCGTCAAATGTACGATCGCGCGGAACTTGTGGATCATCTTGTTATAGATTA  
ACGTCAAAAACAGGAGAACCCATTTATCTACGTACTCATGGATATTTAGAAGTAGATAA  
GGATACGCAAATTCAGTATCCCTTGTGTGCATAAATACATTAGTATCGGAAGAGGAAG  
GAATACAACCTTATGCAACAGATGAAGAAAAGATTCTCGGCTACGATTTCTGAAACCATG  
AGAGCCATAATACAAAATGGAGATGATGCATCGATTGATTTGGGCTCAGATTCTCAAAA  
TCCAAATTCGAAAAGTAATATGGAGGATCCCGCACAAATTAGAGGATGCCATCACATATC  
TAGTTAGTGATCTGTCATCACCTCTTCCAGAAGATTGTCTATCACCTCCTACGCAAAATG  
AACAGTATGCGAAAGCTGCTATGATATCACAACTTACCTCCTGCTGAAGCCCAAGCT  
CGAAGACTTGGAATTAAGAAAATCGATCGTTATTTAATGGTGCAAGCCAAGGCAACAA  
ATAATCAGAAATCAGAATCAAAGACAAATAATAAGAATAACTCTAATGAGAGACAA  
GAAAACACGAGATCGTCGAGAAAACTGTACATGAAGTTACAAAACAAACGCGTAAT  
AGTACACAAGATGAACAGAATTCATCGCGAATTAATAACATGTCTAATGTAGAGTCATG  
CGTAAATACCCAACGAAAACCTGGAATATCTCAACTTGAGCTTCATCAAAATGTGGATA  
TTTTGAATCCTAATACTACAGTTAAGAAACCTGTTGCAACAGTAGAAAATAATCCATGT  
AACGTTAAAATTGAACGTAACATGGATGTTTATACGCCCCGAGACAATGATTGAATACTT  
TGAAAAGAATGCAATTGATAATAATTCTGATTTAAAGAGTCATCCTTATCCATTGAAGAG  
GATATATAGTGACGAAGATATTAAGACAGGTTGCACTAAAAAAGACAGTATAATAATG  
TTCCTTATGCGTCATCGGATACAAGCGATGAGCAGAATATCTCTTACATTGATTGTAAGC  
CTTTCGTGATGAAGAATTTTCAGAACTTTCAACGGATTTCAACAATATAAATCCTCAAT  
CACTAAAGATTGCTGAATCGCCAAATTCAAGTCTAAGTGAAGTCATAACTGATTATCAG  
CAAGTGGATTCTAGTATACCACTTATAGCTCCAAATCCTGAATTGGAAGCGGAATATGG  
CGATCTTCAGGACAATGCATTGCTGAGCCCAGGCCTGGAAGCAAATCCAGATCTGATA  
ATGATGAAAATATTTGATGATCTAAGGCATATACCAATCTTGAAAATACTTTTAATGAA  
ACAGAAGTACAATTAACAGACAATATGGTAATCAATAAAGAAATAAGGAAAAAACATC

TTCAACTTATGAATAATATAGCACGCCAAGAATCACAATTGAATGTTTTGGCACGAGAC  
TTCAAAAATCCAGCTTTGCAAGCGAAAAGAGGAAGTTTAACACCATTAGAG

>novel\_circ\_001047

CAATCCAAGGGCGTCACGGAACATGGCGGAGAAACAACGCCGAGACAATCTTAACAC  
GAACATCTCGGCGATGGCCGCGCTCGTACCGACCGTCGCCGAAAGCCCGAGGAAGAT  
GGACAAGATATCTATCCTGAGATTGGCTGCTAATTTCTCAGATAACATTACACCGTTGG  
ACGTGGCGTGTCCGACTTTCTGCCTCGAGAAGTCTGGCGATCTGGATTTGGAACAGTAC  
ATAGGCGATAATTTGATCAAAAACGGGAGCTTCTTTATCGTTGTCACGACCACCGGGAA  
AATAGTATACGTACGTCCGCAAGTTCAAGAGCATCTTGGTCATACTCAG

>novel\_circ\_001048

TAATCGGTTCTACTAGCGAAGCATTCAATAATCGAAAAACCTCGGACATCCCTCAGTTC  
TTGTTATTCATCGAGCTTCGGCTCCAATCTGGCCGATAACGAAGGATGGTAAGCTCCCG  
TTCGCCTGGTGTAATGTTTCACCAACTAATAGCGTGGCTACATCACGTGTCGTCGTGT  
CTGACAGTGACGTAGCTCGTGATGGTGACGCCATCTTACCGAGCACCCGCCAATCATAT  
CGTGTGGAGAACGAGGGTGGTCATGTAAACGGAGCTCCTGGTGCTGTCGAATGGAGC  
CAAAGTGATCCGCCTTCGCTTTCTATGTCGGTGGACTTGCATAATCTGGTCAATCCGAA  
TCTTCAAGACTCTGGGCATTATTCCGCTAGTCCCGAACACGTTGATGCCATCGCGTCAT  
CTTGTAACATTAAATCTACGAATAATCACGAAGAAGAGGAAAGCTACGAAGCATTTGG  
ATCTGTCGAAGGTGACGCTGATGACGGGGTGGAATCACCGGGTAGCAGTTCTGCACCT  
TCACCCACAAGTACTAGTTCTTTCAAAAATCCAAGAAGTCCCAATTCAACTATAGGAA  
GACATTCTTGTCTACGGACATCACTTAGGCGAACACCGCCTTGTTCCGGAAGGAAGAG  
ACTTAGTTCCAATGCATTAGCAAGTCAACTTTATCGAAGCGGGAGCTTTAATAGTTCTG  
GTATAAGCTCCAAGTGTGATCCCGCGGACGATATGTACAGCGATGTCTCTCTCGAGGAT  
GATGTCATTGATCTCAATCATAAA

>novel\_circ\_001051

GTATATCAATCTGCAAGTGGATACGTACCTACTACAACCTTCTCAATATCAAGCACAACTCT  
GTAGCCACAAATACTGTATCAAATAGTAATACAGGCTATCAAAGTGGATATCAAGGATC  
ATCTTCATTTCAATCAACTCCACAAGCTTACCAACCATCTGCTACTACATTTACTTCACC  
TATAACTCAAACATCTGGAGCTTACCAAAGTGCAGCACAACTCT

>novel\_circ\_001053

GTGAAAAAGGAATTCATAGCGATGCTACGTGAACACAAAGACATCGACAGGCATTTCGC  
ATTGGAGCGATTGTAAGAAAAAATTGGAATCTGATTGGAGATACAGAGTCGTAGAATC  
GGCAAGCACGAGAGAAGATTGGTTTAGGGATTACATTTCGTATGCTAAAGGAGGAGAGG  
AAAAAGGAGAAGGAGAAAGACAAAGACCACCGGCACAGGGAAAAAGATCATCATAA  
ATCGGAGAAGAAGGATAGGGACCGTAAGGATGTTGATAAGTATAAGGAAAAATCGTCA  
AAGGATCGGGTTGACAAGGACAGTTCAAAGGACAAAAAACGCAGGAGCGAAGTACC  
TTCGGAGGAAAATGGTAAAGAAAAGAAGGATGCGGTATCGGAGAAAGAAAGCGGAG  
AAATTGAGGATAATGATGAAAAACCGTCGAAAAAAGAAAATGACAAGGAGAATGCGG  
AGGATCAATCTGATTCCGAGGAAGATCGTGAGAAACAGAAACGAGAGCGTGAAAGAA  
GGGCGGAAGCGAGCCTTCGTGAAAGAGAAAGAGAAGTTCAAAGAAGTCTTGCTACAC

ATCTTCGCGACAGAGACAAGGAAAGGCAACATCATCGTCACACAGAGGCTGTACAGC  
ATTTCAAGTGCTCTTCTTGCTGATTTAGTGAGAAATGGTGATTTAGCTTGGAGAGAAGCT  
AAACGACAATTAAGGAAGGATCATAGATGGGAATTAGCAGAAAGCTTGGATCGTGAGG  
AGAAAGAAAGATTATTTAATGAACATATAGAACAGCTTAGTCGCAAAAAACGTGATAA  
ATTCCGAGAACTTCTCGATGAAGTAGGAGCTTCTACTGAATTAAGTGCATCGTGGCGAG  
ATATAAAAAAATTACTGAAAGACGATCCTAGATATCTTAAATTTTCATCCAGTGATCGAA  
AATGTGAAAAAGAATTTAAAGAGTATATTAAGATAAACTTGTCGCAGCTAAAGCCGAT  
TTTAGAGAACTTCTACAAGAAACAAAACCTTATTACTGATAAGACATACAAAAAAGTAC  
AAGAAAATAGCGGACATTTAGCAGAAATTGAAGAAATTTTGAGGAAGGATAGAAGATT  
TCTTGTATTGGAAGCAGCTGCTGCTGAACGAACACGTTTATTAATGGGATATTTAGAAG  
AATTGGCACGTAGGGGTCCACCTCCACCGCCTACTGCCTCCGAACCTTCAAGAAGACC  
AACCACAACTAAACGAGGCCCGCATCAAAGCATGGTATATATATGGTGTCCAAATAAC  
AAATCAGTGATTGAATTTATAGCTGTAGTTGAATTGAAGTACTTTACACACGAGATGATT  
ATCGCCTGTAATTATAGGATTCAATAAACTAACGCCAATTCCACACAGCTAAAAAAA  
TGTGTGTCATACTGTAAAGATGCCATAGTGTAAGCATATCATTATTTGTTGGATTACATTA  
AAATAGATACTAGTTAACGAAAGAATTATTATAGTAATATCATAAAGTGCGAATTTTATAC  
ATATTTTATCCAGGTTTGTACATAAGCACCCCATTATGAATCTTTTGTATGAAAATTACA  
TGAGAATTGCAACGAGTGTTTGTGCGACACTCTCAACTAGTTTAAAAGCATGCGCAGT  
GAATTTCTATAAACTGATGTTAAAAATATAATAGTCCAAAAAAATTTTAATCCTTATGTA  
TCTAAAACAAACAAAAAATGTATAACGTACGACAATCATGCACCATAATTTTT  
TGACGGAGTATATATAGTTGAAAATAATTTCAATTTTCGAATTATTTTCTCATAACAGC  
TTTATTGGATCATGAAACGTAAGTATCCTATAAAACATTGTCATAAAAAATTTTGATTCTA  
AAGAATTCGTAATAAAAAAAAAAAAAAAAAAATTATCACGCATACAAAAAATTCTATTGTTT  
ATAGTAACAATTATTTACTAATTTATTCATGTGGCATTTTTACGGTACGAAATTCATAAAA  
CGTATATTAGGAAAATATATTTTCTTCAATAAATCATTCATAAAAAATTTGTGAAAAAAA  
AACAAATTTTACACATCTCCCAACAATTTATTATTTTCGTTTTTTTATTCTAATGTTTTAT  
AATATTTTATTACAGACTTGCGTAAACAATTAAGTGTAAGTAGTACAAATAATTGAAG  
ATAAATCATAAAAAATTATCAAAATATTAATTTGTAAATTTATTTTATATCGAAGAATATTG  
AAATCGTTTATTTTATCCGAAAAATATTAATTAATTTTAGTACGATTATGTAATATTATAA  
TGTTACAATATATTCAATGTATATAAAATAAATACTATAAAATTTATGCGCATTGTAACATT  
ATAAAAAAAAAAAGAAAGAAAGAAAGAAAGAAAAAAGAAAGAAACAATTTTGC  
TTTCTCAATCATATACTTATTCATTGCATGATTTTGTTCAAATATTGGAGAACAATAATA  
ATTATTTATTACATATCATTTGATCAAATGAATATAAATAACGACTTATATACTATCTCTAAT  
AAACAGCTATATTTTACATATTCTTTTATTCTTACAAGCTATGTCAGTCATTGAAATATA  
CGCGGTGATTTCAACGCCTGGAACGGAGATTTCAACGCTTGCATCTATCTAAGAAAG

>novel\_circ\_001054

GTGGTGCCACCACCTGGTGCCGCGGCCAGCTCCACGGCCGCTCGTTGTCGACACGC  
AGACGAACTCTCGAGTGACCTCCTCCCCGGGCTGACCGTGCACCCGGCCGCGGGA  
AGTGGATCTGGCACTACGTCGCCCCGAGGGTCGGCTCTTTCCGAAGGAGCACCGGTT  
CCGCCGATCGGCCCCCGTTGATGTTCTGCCGAAGGAGGCCCTCCTGGCCGGAAGTCGA  
CATACAAGCCACCTCCGG

>novel\_circ\_001055

GCGAAGGGGCGAAGAAGCGTGGACGGAAACGGGACGAGGACACGCGGCGGCGAGG  
AGAGGAGGGACAGGGCGATGACTTAAGTCACTCCCTGTTTGACCGAGGAGGAGGAAG  
GAAGGAAGGAAGGAAGCGGCGCCCCGCGAATGGGGGGAGAATCGATACGACCGTGA  
CGCGTAGAGGAAAAGAATCGCGAGGAAAGTTCGAGCTGTTTTTCTCTCTCTCTCC  
TCCCCGTCGCTTCGAGATCGATGCGTGCGAACAAAACCGGGCCTCGTAACAAATCCCA  
TCCTCGTCGGGAACGCGAGGCGCCCCGAAAACGATTGGCCCGATCATCGTTTCAGCG  
TGAGAGATAGAGAGAGACATAGACGGATAATCGACGAGATGAGCTTCTTCAACTCGTT  
GCAACAGTACGTGACGGACAGCGTGGCTAGCTTGAGCCTGAGCCGAAGAGGTTCTC  
GTTGAGCCGCGAGGATTCCGGGTCAAGCGCGACGGGAAGGAGCGGCTCGACGGGGA  
GCGTGACGAGCACCACCAACACCAATTCGACGGCGCAACAGTCCACCCCTCATGGGTA  
TCCAAAGGTGGTGCCACCACCTGGTGCCGCGGCCAGCTCCCACGGCCGCTCGTTGTGCG  
ACACGCAGACGAACTCTCGAGTGCACCTCCTCCCCCGGGCTGACCGTGCACCCGGCC  
GCGGGAAGTGGATCTGGCACTACGTGCCCCGCGAGGTCGGCTCTTTCGAAGGAGC  
ACCGGTTCCGCCGATCGGCCCCCGTTGATGTTCTGCCGAAGGAGGCCCTCCTGGCCGG  
AAGTCGACATACAAGCCACCTCCGG

>novel\_circ\_001056

AGAACAGTTTCGTGGAGGAGAGGTCTCGACTGAACTTGAACGGGAGCCGTCAGCTCT  
CGAAAAGCGCCACGGAGCTCCGGAACAACGACAGCGGTTCGCCGTCACGACGCGGT  
GAACAAGTCGAGTCGGGTGTCGTCCATCACCATCGCCATCACCGACACGCCACTTCGG  
TGCGCAGCGTACGCACATCTTCTTCGCTACCTTGAAAAGCCGGTGGGGTCGCAACAG  
GAGCAAGGAACGGAAAAAGTCGAAGGATGGCGGGAGCGTCTTACCGCATGGCGGGAT  
CGAGTCCGATTACGCGGCCGATTACTCGTCCGAGCACAGCAAAAGCTCGTCGGCAACG  
CAGAGCCCAGCCAGGCACTGTCTCAATCATCCGGAATCACCGTTGGTATGCGGAGGAA  
GGCAGAATGTCGTGACAAAAGCGGAAGACAGTCCTGGAAAATACAGCGAGGCGCACT  
CGAAAGGATCGTTGAGCTTCCAGCCGTCGAAAGATTCGAACGAGGAAGCTCGAGGAT  
CGATCAGCCAGGAAGATAGCGCATTTCTCCAGGAGGAACTCGCACGTAGAAGGGAATT  
GGCGTTGAGGCAGCATGCCTTCTTTCAGCTTCGTTTGACATCAGAAGAGGGATGAAT  
CTCGTCGCTATGGATAGATGCGGCGCCAGTGATCCTTACGTGAAAGTGAAAAGCGGAG  
GTCGATTGTTGCACAAGTCGCGGACCGTTCATCGCGACCTAAATCCAGTTTGGGACGA  
AAGTGTGACCCTGCCTATAGAGGATCCTTTTCAGCCTCTTACGTTCAAGCTGGCAAAAG  
ACCTTGGTCGTTTCGACAGGTCTTCGACTATGACTGGGGTCTGCAGGATGACTTCATGG  
GGGCGGCTCAATTCGACCTCGCGCAGCTCGATCTGGGCCAGCCGCAAGATATCGTGTT  
GGAGTTGAAGGATCACAATAGGCCGAAACAACACCTAGGCGAAATTTATCTGACCGCC  
ACGCTTTGGCCGAAAAATCAACAGGAGAAAGAGCAG

>novel\_circ\_001057

TCTATTAGTGAACCTCGTTAGAAGTTCTTTCTAACAGGCTGATGTATTAGACATCGTGATA  
GTGAGAGATGATTAGTGAGAATTATTTTGAGAATTGTATTTGGTGTGCATCCCTCTAGTG  
GCGAATATAGGAGGATCACACACATTAATACGCGACCGCACCCGCTCTATGTGTGGT  
GATTCATAGATATAATATTTATCGAATTTTACGCCAAAATAAATGCAAAATGACAGAGG  
TTCACAATTTAGGCGTTGATGCTATTAGTTGTCATGCTTGGAATAAAGATAGAAAAGAA  
GTGGCAATTTGTCCAAATAATAATGAAATTCAGTTTATAAACGAACGTCGAGCGGTTG  
GAAATTGTTACAAAACCTTGCAAGAACATGATATGCATGTCATGGGTATTGATTGGGCAC

CAAATACCAATCGAATAGTAACATGTTCTGCGGATAAAAATGCATATGTTTGGACACAA  
GAAGGAGATGGAAAATGGAATCCGGCATGGGTTCTTTTAAGAATAAATCGAGCAGCAA  
CTTGTGTAAAATGGTCTCCATTAGAAAATAAATTTGCCGTTGGATCTGGAGGTAGAGTA  
ATAGCTGTTTGTATTTTCGTATCTGAGAATAATTGGTGGCAGTGCAAGCATATAAAACGC  
CCATTGAGATCCACCGTAACTACAGTTGATTGGCATCCAGACAATAAAGTTCTAGTTGC  
TGGATCCACTGATTATAAAGTTCGTATATTTAGTGCATTCATTAGTGATATGGAAGATGCA  
CCTGGTAATGGTCCTTGGGGTCATAGCAATACTTTAGGAACGTTACTCGCTGAATTCCA  
AAATACTCCTAATGGAGGAGGTTGGATACACTCTGTTGCATTTAGTCCTTGTGGTAATA  
AAATTTGTTGGGTAGCACACAATTCATCGATTTGCATTGCAGATGCTACTAAAGGAAAT  
GCAGTTATACGATTGTATACGGAGCATTTACCATTTTAAAGTTGTGTATGGATGGGGTCC  
AATTCATTGTTGCTGTGGGACATAGTTGTATGCCTATGTTATATTCCATAGACGACCATG  
GTCAACTATATTTTGTATCAAACTAGATAATACACAAAAAAGAAGCTGCCGGTTTG  
TCTGCCATGCGTAAATTTCAATCGTTAGATCGCCAAGCGAGAACTGATACGAATGACAA  
TGCCTTGGATAGTATTCATCAAAACACGATTAATTGTGTACGCAAAGTATCAGATAACG  
AATTTAGCACGAGTGGTTTAGACGGTCAATTGGTAGTTTGGGATCTTAAGCTTCTGGAA  
AATTCATTGCTGGTCTCAAGATATCATAGATAAAAATCTTTTTTTTATAACGAAGGAA  
GACGAAGGAATCAAAGGAAGATATTACATCCGAAGAAAAGATGTATAAAT

>novel\_circ\_001058

AAGTGGCAATTTGTCCAAATAATAATGAAATTCAAGTTTATAAACGAACGTCGAGCGGT  
TGGAATTGTTACAAAACCTTGCAAGAACATGATATGCATGTCATGGGTATTGATTGGGC  
ACCAAATACCAATCGAATAGTAACATGTTCTGCGGATAAAAATGCATATGTTTGGACAC  
AAGAAGGAGATGGAAAATGGAATCCGGCATGGGTTCTTTTAAGAATAAATCGAGCAGC  
AATTGTGTAAAATGGTCTCCATTAG

>novel\_circ\_001059

GAGTCAATCGAAGGCCTCTTATCTGGCATATCGGCGAGAACGAGGTGCGCCTGATACC  
GAAGGTAGTTACAAGAGAACCATGTCACCGACATCTCGCCTAGAGGATTGGCCACCGC  
CACGGGATCACGATGATCCGGTTCTTCTTCGCGTCACGCCTCATCATCCGTTGCAGCAT  
CATCACCATCACCATCATAACAATCACCATCACCAACAACAACCGGAGCTTTCCAAATC  
GCACAGCGTGGACGCTCTTCATCACCGGTTAGAAGAACGATCGGCGCAACAGCAACA  
GCAGCAGCAGCAACAACAACAACAACAACAACAGCAACAACAACAACAACAAC  
AACAAAATTCGGCTGAGATGATTGGAAGTTGTGCGCACGATTTGAACAAGAAATTGCA  
GTTGAATGATGCGAGATCACGAACCAGTGAGAATAATAAACGATAATTTGGAGGACC  
GACATCAGCATCATCACCATCATCATCATCATCATCATCATCATCAAGAGAGGAGAC  
ACGATTATGAACAACGTAAGGAACGACAGTCCCCTCAGAGTATCGAAGTTCTTAACGA  
TAGAAATCGACAGTTGGAACGCGAACGCAGGAAGTTGGCAGCTAGTTGCGAGCCTTTA  
TCTCAGAACAGAGAGAAACAGAATCGGAGTATGGAAATACCTTCTTCGGTGGTCAAG  
AAAATTTGTTTCGCGAACGGAGCGCCACCATTGAGATGACCTCACAGAACATCGAACT  
TTTGAATCGACGTAACGAAAAGAGAACAAACGTTACATCGACAACGACCAGCACGAT  
CACCATTGTATCACTACATCGTCAACAATACTGCAATGACGATCACAACGATAGTT  
GTTGGCCACGCAGCCTCGAAGTGCAGAGTTCCATCGAAGCGTCACCTGTTTCGGAAA  
AGCCTACACTACCGACCAGTTCTCCTCCAAGATCACCGGATCAAGTCGAAGGAGATAG  
TTCAAGAGGAGCAGTACCGAGACGATCCGGAAGCTGTTCCAGTTCTTCCTCCTCCTCT

TCTTCCTCCTCTTCCTCTTCCTCCTCCTCCTCTTCCTCCTCCTCCTCATCCGGTA  
AATCCTCGGATCTTCATATTTACCACGAAACTTGTCCAATAGTTTCTCCAAAAACGAG  
AATCTTTCTTAACAATAGAAAAGTCTCGAGCCCCACTCAAACGGACAACACTGGTT  
CTTCCAATAGATCCAGTTCACCTGTTTCGCTCGAATCAAACGAAAGAGATAGAATTGCG  
AATGGATAGGTCTCTTTATCGAGCAAATCTAGATCAGGAGGAAGATCTTCGACTTCTT  
CCGTATCGAGCTGCGTATCGAAAGCTTCCTCCTCGTCGTCATCGAGAAATTCTCCGGTC  
GAAGAGGACATATCGTTTTCTCCAATGTCGCCATGCGTATCACCTCAACCGGGAATAGA  
GGGATTGACACTGTTACAACGTACAGAGGTTGTGCTTCGAGTGAACACGGCTACCAGT  
GACGTTGCCTCGCAGACAGATATTCCAGAAACAACAGAGATTGAATCATCGACAGTCA  
AGATTTCGGGAAATTCTTCTTTGCAGAAAGAAATTACCAGAAGAGATCGAATGCGAGGA  
ACTGGGTCGAGACTTGGCAAGTCAGCTCAATCCGAACGATAAGCTGGTACCTCTTTTA  
GTTCCAGCTCCAGAGCATAAAAAACCCACAGACTATGTTACCGGTCTGTTACAGGTGG  
AAGCGACTTTGCATCCGCGACCTAAACGTCGATCGTCTCTCGAAGAACCAACGACCCC  
TTGCTCGGATAATGGAGACGAGGAAAAAAA

>novel\_circ\_001060

GACTGAAATGGAGGCAGTGTCTGGGGCCAAAAGCGGCACTTTGAAATTTATACGGACT  
TTGACTAATATTTCGAAAGATGCTGGCGGTGTGGCACATATGCGATGTGAGGTTGTTGG  
AGATCCTCCACCAACTAAAATCAAATGGTTCAAGAACGAAGCACCTCTCGAAGAAAA  
ACGACCGAAAATTACAATTAAGAAGATACATGCACAAGCACATGAACATGCTGCGAAG  
AATATTGCTGGAAGTCGTTTAAAGATCATCAACTTAGATGTCTCTGACGTAGGTTTCTAC  
ACTTGTCGCGTAACAAATGGAAAAGATCAGATTCAAAGCGAAGGAACTCTTCGAGTCG  
ATTCTTCCAAAACAGACATG

>novel\_circ\_001061

CACTGAGAATATAACAAACATTGAAGTTTGAAACAAGTTTGGATCTATACTCTGAAGAA  
AATCCACGTGTAAAAGAGAAATTCTTGCTTGCATAAAAACTATAAAGATCATGATACA  
ATATAATTTGGCCAAATATAAATACTATATGAAATAAAAAAGAAACGACACAGTTTGG  
AAACAAATCTATCCTCTACAAAATCTATACAGAAAATGAAGAACGAAATCTTTAGCATT  
TGAAGAATCTAAAGTTAAAACAAGGAAGATTCTACTATTTACATAAGAATTAAAAAA  
GAACAATGATCTATTACTAAAACTCATCTCTATTCTTCTAAAAAGTTCTTTCATAAAAA  
GGGAAAAAAAAAAAAAAAAAGAAAACTCAATTGACAAAAATTAAAACCAAGAATCC  
AATAGGATCCGCCTACGCGAAAAATAAGAAAAAATTCCAAAGAAAATGCTCGTCAGAAA  
TTTTACCCGTGAATCTCCAACATCGAATCGAAATTTCTCGACAAAAGTAACGACGAG  
GAAGCAAGCAACCCTGTCTCAAATCCATCTCCAATCTTCCGAAAGATCCTCTCCTCTC  
GTAGGGAAGAGAGAGAGGGAGAGAGAAAGAGAAAGAGAAACGATACCACCGA  
GAGAATCTCGAGATTCCGAGTATTCCCTGTGAAAACAGATCTTTCGTAGAGGCAAACA  
GCGTCGAAATTTCACTGCAACCTATATGGAGAAACACGTTGGACCCTTGGGAGGGGGT  
GGGAGAAAAAATTCGGCCGCGATAAATTCGGATCAGCGGCGCGGATAAATCGAAGGC  
AGGGAGAAATCGAAGCGAAGGAAGGGAGGAGCCGGAAGAGGAAGATCGCGCGACCG  
GATAAAACCTCGCGCGAATAAATTGAAAGAAATAGACAAGGACAAAGGGCAGGTGGA  
GGGAGGGGTGGTGGACGGTCGAAAACGCTGATAAACGGTTGAATAATGGGCGGGCAA  
ATTGCAGGAGCGGAGGAGGAGCGCGTGATAAACGTACGGACGATGCAATCCTTTTGG  
GCGAGGCGCGGACGTTTCGGAACCTGGATGGGAAGCGCGCGGCTTCCGCGCCTTGTGT



GTCCAATTTTTTATCGTGGAATGATGACTCTGATGATGATTGAATTTTCGATACATAGC  
TCTTTTCTTACATCTTTTTTAATCGATCGAGATGAAGGGTGGAAGAATTAAGGATCGGAT  
GAAAGAGAGAATTTGGAGAGAGTAAGAGGGAAGAAAAAGAATTTTGAGACAAAGGA  
TTTGGAATTGAAAGGAAAATCTGTATTTAATTGGGAGGAAGTAAAAAAGAGAGGAGC  
CAAGACAAATTTAGAAGAAAAATATAAACTCGCGAAATATCAAGGAGAAGAGAAGG  
ATCTCGGGAAGAAGTTTGAAAAAGAAGAATCGGAAGAGAAGCCCATAAAGGGAAG  
GAAAATCTGAAGGTGGTAGTTCAACGCCGCAAATCCAATTTTAAAAGCTTCACGTGAG  
ATTAAACGCCACTTGAACGCTTCTCCCATGACTTTAACTCGCTTCTTAATGGCGCAAT  
AAGTTCCAACGTGTCCACGGCTATCAAGCGAAAGTTACAACTATCCTGTTGAAAAAA  
AGTTAATAGCTGATCGTAAAGGGAGTAAACCACGCATAATAAAAATCAGCCTAAACGC  
GCAATTTTCTCAAATAGTGTTCCTTTGTGTTCCCTTTAAAGAAAACTGCATCTAAGAC  
AGTGATTCTAATCTCGATTTTGATTTCAAATTCGATGATAAGATAAACGTAACA  
CGACGTAGACGAATTAAGATTTAAAAAATTTATCTGAAGTGATATTTTCGTTTCTTT  
TTCTTTTCTTTTTTTTTTTTTTTTTTGTGTTGTGATCGTGAGATTTTGTGTTGAAATTAAT  
GAAAATGATGACGACTACTGCCGGTGTGTTGGTGGGGCCGGGATGCTGAGGACCAGGCG  
CAGGGATTGCAGCGTGAAACCGAACAGGAACTCGACCGGAAATCCTCGAGGGGGAT  
GATTTATGAGAACGAGGAGCTTAGACTGAGGACTATTCACATTAACGCCGAAGTGGAG  
CAAG

>novel\_circ\_001064

GAGAGCGACAATCTTTGGTGGGACGCATTCGCGACTGAATTCTTCGAGGATGACGCAA  
CCTTAACCCCTCACCTTCTGCCTGGAGGACGGACCCAAGAGATACACGATAGGAAGGAC  
GTTAATACCCAGGTAATTCGGTTCAATATTCGAGGGCGGTGTGACGGAACCTTACTACA  
ATTTGAAACACCCGAAGGAGTCATTTACAATACCAGCATAACCCTCGACTGTGATAAC  
TGCGTTATGGTTACGCATCACGGAACCGATGTTACGAAGGTATGCACGGAGGGTA  
GATTAATATTGGAATTCACGTTTGACGACCTTATGAGGATAAAGTCGTGGCACATGTCG  
GTGAGGACGCACAAGGAGCTCGTGCCTAGGACTGTGGTTCGGTATGCAACAGGACCCG  
ACGATGCTCGAACAGCTTAGCAAGAACATCACGAGGCAGGGCATCACCAACTCCACC  
CTCAACTATCTTAGG

>novel\_circ\_001065

GCTGTAGCCGCCTAAACACGCCATTGGCAGCCACTACCACACTGGAGGATCCGGGAAC  
ACCAGCCTCTTGGAAGGGCCCCGCCCGGCTCGGAGGCATCGCCCTTTACACCCAAC  
TCCGTTGGCCAGGGTGGTGGCCCTGGCTCCGGTCCCTACAACAATACAGGTGGTCCAC  
CGAGCAATGCGGCGTTCCAAGGCCCAAGCCCTTTCCCCGGTGGTGTGTTAGTCCAGC  
CGGGGCGCCTCCTTATCAAGGGCCACCCCTGGTTCCGCGACCCCTCAGTATACTGCCT  
CGCCAGCGCCCAGCGGCTCCTCGACACCCGGCCCTGGGCCACCGCCCAACTCGTCGG  
GCTTCCACCGCCACCCAATAATTCCGGGCCCCCGTATAATGGGCCCCGGGCCGAGCCCA  
TTCGGCTCGCCATCTGGCGGGCCTCCGCAGTTCGTCGGTCGACCCGGCTCCTCGGGGC  
CGCCGTTTCGTACCTCCGGGAGCCGGAATCCTCACTTTCCTTCGCATGGTCAACCGTTT  
GGCGGGCCCCAATATGGTATGCCACCTGGAAGCCCGTTTGGACCCGGCCACCCGATGA  
CAGGACCTATCGGGCCTGGACATCCAGCGATGATGGGACCCGGTGGACCCGTCGACAG  
GATGGACCAAGG

>novel\_circ\_001066

GACGAAGTGCTGACAATATCTGAAAAGGTCGTGGTGCGTGTTTCATGATCTCGTTACGT  
GGTTATCGCCTGCATTGGAATGGTCATGGGGTCGGGAAGTATCTTACCCACCGACCCCA  
ACGTCGTCTCCGGAGAATAGCCCGTTAAGGTATGAGATACCTCAACCGCAGGTGCTCA  
CCGATCCTGGCATTGATTTTTTCGGACGTCGATAAGCAACAGAAGGAGTACGAAAGCAA  
TCACAACACGCGAAAATCGGACTATAGTTCTCAAACGAAAGTGGTGGTGCTCTCGTAT  
CCCAGGTATTGCCGATATCGAGCACTCTTACGTAGGCTCGAAGGCGCCGAACCGTCCT  
GGCTTTGCTCGTCCATAGCAGCCGCACTGGGTGGATTACCGCCACACCGGGTACAAG  
GATACTCTTCTGTAGAGATACCTTTGACTATCCGGATCTTGAAACTCACGAGCTCCTCT  
GCAATCATTTAGCACCGAAATTGAAAGGAAGGCCGAGGAGGAAACGCAAAAAGCGCA  
GCGCATCGCCCGGTGAATCGAGTAATGAAAGTGAAGCTTCCGTTGCGTCCACGTCGAA  
AAGTGCCCCGGCGAGTTCGAACGTTATGGTACCGAGCGTTGGTAGGCCACCTTCGTCTG  
GTAGTACGGCGAAGCGAGCGGAAGACCAGCGCGGAGGAAAAGAAATTCATAGCGGAC  
GTGCAGAAATTCATGAACTCGCGGGGTACGCCTGTCGGAAAGATGCCACTGCTGGGCT  
ACAGGCAGA

>novel\_circ\_001067

GACGAAGTGCTGACAATATCTGAAAAGGTCGTGGTGCGTGTTTCATGATCTCGTTACGT  
GGTTATCGCCTGCATTGGAATGGTCATGGGGTCGGGAAGTATCTTACCCACCGACCCCA  
ACGTCGTCTCCGGAGAATAGCCCGTTAAGGTATGAGATACCTCAACCGCAGGTGCTCA  
CCGATCCTGGCATTGATTTTTTCGGACGTCGATAAGCAACAGAAGGAGTACGAAAGCAA  
TCACAACACGCGAAAATCGGACTATAGTTCTCAAACGAAAGTGGTGGTGCTCTCGTAT  
CCCAGGTATTGCCGATATCGAGCACTCTTACGTAGGCTCGAAGGCGCCGAACCGTCCT  
GGCTTTGCTCGTCCATAGCAGCCGCACTGGGTGGATTACCGCCACACCGGGTACAAG  
GATACTCTTCTGTAGAGATACCTTTGACTATCCGGATCTTGAAACTCACGAGCTCCTCT  
GCAATCATTTAG

>novel\_circ\_001068

TTATTGGGCGGTGCTTGCTTCAGCCATGGCCCGTACACGTTCTACAAAGCGGTTAGAAT  
AGGAAATGGTCGCGTACTTCGTCTTGGAAGCTTCTTCCTCACGAAACTGTGGAGCGAT  
GCCGATCTCGTCAGCATCGGGGAACCTCAGCTGTTGTGGATGGACAGCCGGGGACCGA  
ATCAACCTCTGGCATCGTTGCGGTTGTACTTCTTGCCGGAGAACACCCCGGATGGCCG  
AAGGGACACGCATGGAGAG

>novel\_circ\_001069

GGGAAACACGTGAGACACAGCATCGTCAGGGACAATCGTGATCGAGGTGGACGTTCA  
AACTCGCGCGTAAATGCTTCGAAGGCCATCGTCTTGGAACCATTTCGTCCGGTTGACAG  
GGAGCCGGGTTGGTTTTCACTTCGAGAACGAGCCCAAAGACTGACTCTGCATCGACCA  
ATACCTAGTGGGGGAAGAAGGAAGGCCGAGAGGGATTAAGGTGAGGCGAAGAGGAA  
GGAAACGGATCTAAGCGGCGAACGGTTGGTTGAATTGCCAGGTCCGCGCATGCTTCAG  
CAACGAGGCAGTTCAGTAACGACACCTCCCGCGACGTCATCCTCCAACATGTTCCCTC  
AACAGTATTGCCTACGATGGAAATACCATCACAGCAATCTACAGACCATGTTCTCACAG  
CTGCTCGAGCGGCAAGCTTATTGCGACGTCCTCTGGCCTGCGAGGGCAAAACTCTCA  
GAGCGCACAAGTATCTATATTATCGATAGTTTCGATACCATCTTATCGATGGTAAAAATAT

CGATGCTTGCTAGTATATCGATATATCGATAGTTGCCGCCATGTTTAGTTATTAGTGGGAC  
GAGTGTCGTGTGACATATCAACGATTGTTGTGCCATTTCTAGATATTTTAAATAACACAA  
TTTTTAATATCTACTACGTAACCTTAATAATACAATACCAATTATTGAAATTAGAATTAAATT  
GCCGATATATTCCTGTTTAATTCAACGTCGGTGTTTACTTTGTTGCAAAAACGTTACATA  
ACCTCTCACAGTAGGTGGTTCTGTCAGCGTGCAGCACGTA CTTCGACACGATTTTGTCC  
CAGTACGAGGAGAAGGACCCCATTTGTCATAATGCGGGACGTCAAGTTCTCAGACATCA  
AAGTGCTGGTCGAGTTCATGTACAAGGGAGAGATTAAACATCGACCAT

>novel\_circ\_001070

GGGAAACACGTGAGACACAGCATCGTCAGGGACAATCGTGATCGAGGTGGACGTTCA  
AACTCGCGCGTAAATGCTTCGAAGGCCATCGTCTTGGAACCATTCGTCCGGTTGACAG  
GGAGCCGGGTTGGTTTCACTTCGAGAACGAGCCCAAAGACTGACTCTGCATCGACCA  
ATACCTAGTGGGGGAAGAAGGAAGGCCGAGAGGGATTAAGGTGAGGCGAAGAGGAA  
GGAAACGGATCTAAGCGGCGAACGGTTGGTTGAATTGCCAGGTCCGCGCATGCTTCAG  
CAACGAGGCAGTTCAGTAACGACACCTCCCGCGACGTCATCCTCCAACATGTTCCCTC  
AACAGTATTGCCTACGATGGAAATACCATCACAGCAATCTACAGACCATGTTCTCACAG  
CTGCTCGAGCGGCAAGCTTATTGCGACGTCCTCTGGCCTGCGAGGGCAAACTCTCA  
GAGCGCACAAG

>novel\_circ\_001071

CATCGTGAAATTCATCGATATCGTTGGAAACAATTTTCGACCTACCATTATCTTCGTAATT  
CGCATTCGTGATTTTTACAACGCGAGATCGAGTGTAATCGAATGTCGCCGTTTCGATCC  
CGCATCGCGTCCGGACCTGTGGTCGCAGATCCGCGAGTAACTATCAAAACATCG

>novel\_circ\_001072

TTAATTTCCACTAAGCAAATTATTGATAAAAAATGGGAATTAACATCAGAAGGTCATCAT  
GTAATGAATTATGGAAGTCATGAAGCAGCAATTTATAATGCAATTCCTGATGATGGAATG  
CCACAATCTGAAATTATACAATCAATTCCATTTGCAAAAATTGGATTTTCAAAAGCATT  
CAAGCTGGTTGGATTGTAATTGACAAAAGTAATGGTACACCTATTGTGAAAAAGAAAG  
CAACTTCTATTATAGATATTATACAAAATGATTTAAAGGATCTAACAAGTTTAACTGATC  
AGCTTAGAAATGATTATAAAAAAAGAAAACCTGATTCAAGAAGT

>novel\_circ\_001073

ATGTTTAAAGGTAATATAGATGGTGATACTATAAACTTAACAAATTTGAAGTACCAATT  
ATTGCACAATGGATTAGAATAAATCCTACTCGATGGCGGGATAGAATATCATTAAAGATTA  
GAATTATATGGATGTGACTATGTATCAGACATCCTTTTCCTTCAATGGTTCATCCCTTTTAC  
GATATGATTTATTAAGGGAACCAATAGAACTGACAGACATTTTATACGTTTTTCGATTTA  
AAACGAATAATGCAGATGGTATTTTAATGTATTCTCGTGGGACACAAGGAGATTATATAG  
CTTTACAATTAAAAGACAATAGAATGATATTAAATATAGATTTGGGATCTGGTATTATGAC  
AAGTCTATCTGTTGGAAGTCTTCTTGATGATAATATGTGGCATGATGTTTTGATATCGCGT  
AATAGGAAAAATATTTCAATTCTCTGTAGATAGAGTATTAATTAAAGGAAGAATAAAAGG  
AGAGTTTCATAGACTGGATTAAATAGAGCACTTTATATAGGTGGTGTACCTAACAAC  
AGGATGGATTAGTAGTCAATCAAAATTTTACTGGATGTATAGAAAATTTTATCTTAATG  
CAACTAGTATTATTCATGATTTAAAGGAAACAGAAATTATTGGTGAAAATCTTAGATATT

ATAAAGTGAATACACTTTATAACTGTCCTGAACCTCCCATAATTCCTGTTACATTTTAA  
CTCATGGTTCATATGCTAGACTTAAAGGATACGAAGGAGTATCTTCTTTGAATGTTTCTC  
T TACTTTTCGAACATATGAAGATAAGGGTATTATTTTATATCATCAATTTACTTCTCCGGG  
TCATGTAAAGCTATTTT TAGAAGATGGTAAACTGAAAATTGATATTCAAACAAAAGGAA  
ATCCTCAAGTAATTTTAGACAATTTGATGAAAAGTTTAATGATGGCAAATGGCATCAA  
GTTATTCTAACAATTTTCGAAAAACAATCTTATTCTAAATGTCGATGGAACACCCATGCG  
GACCAGACGTATATTAGATATGGT TACTGGTCCTATTTATATGATTGGTGGTATGAAAGG  
AATAGAAAGCAGTCGCGGTTTCGTTGGTTGCATGCGTATGATTAGTATCGATGGTAATTA  
CAAATTACCAACTGATTGGAAAGAAGAGGAATACTGTTGCAAGAACGAAATTGTTTTC  
GATGCTTGT CAGATGATGGACCGTTGTAATCCGAATCCGTGCAAACATTTTGGCGTATG  
TCGACAAAATTCTGATGAATTCTTCTGTGATTGTGCCAATACAGGATATACAGGAGCAG  
TTTGT CACACTTCTTTAAATCCCCTTTCATGCGAGGCATATAAAAAACATAAACTCAGTTA  
ATCAACGAGCAGATATTAAAATAGATGTTGATGGAAGTGGTCCTTTGAAACCTTTTCCA  
GTTGTTTGTGAATTTTATACAGATGGACGTGTAAGAACGATTTT GCGACATAATAATGAA  
CGCATAACACCTGTGGATGGATTTCAAGAACCAGGTAGTTTCGTTCAAGATATTATTAC  
GATGCGGACATGGATCAAATCGAAGCTCTTTTAAATCGATCTACTAATTGTAGGCAGAG  
AATTAGTTACGAATGTGTACATTCTAAGTTGTTTAATTCACCAGTACCTCAAGGAGATTA  
TTTCAGACCAAATTCATGGTGGGTTAGTAGAAATAATCAAAAAATGGATTATTGGGGAG  
GAGCTTTGCCAGGTTTCGCGTAAATGCGAATGTGGTATACTCGGAAATTGTGCAGATCCT  
ACTAAATGGTGTAAATTGTGACTCTGATTTGGATGGTTTATTTGAAGATAGTGGAGATATT  
ACAGAGAAAGAATATCTTCCAGTTAAACAATTGCGATTTGGTGATACTGGTACACCAGT  
TGATGATAAAGAAGGACGTTATACACTTGGACCACTTATTTGTGAAGGAGATG

>novel\_circ\_001074

GTAATATTCGAGCAAACGCTAAAGGTGAAGCAGATGTACACATCAAAGATTTCAATTATT  
TCTTTGACTGGAAAGAATAATATTCTTGGACGTGCAATAGTTGTTCAATTCTGATGAAGAT  
GATTTAGGAAAAGGGAACAGTAGTCTTTCTACAACCACTGGAAACTCGGGAGATCGTT  
GGGCTTGTGGTATTATCGAAGCTAACTAGATTTCACTGAATTTGATTCTTCATTTGATTTT  
ATATTTAAAATTTAGAATTTAG

>novel\_circ\_001075

GAACAATTTAATGGTCAAGGTTTCATGGGGAAATGGTGGAGCAATGAGAATTGCACCTA  
TTGCACTGTTTTCTATCAAATATGATAAACTTTTAGATACAGTTAGGAAAGTAACTC  
AAATTACTCATACATAAAATCGGAATAGATGGTGCTATTTTACAAGCAATAGCAATTT  
ATCAAAGTCTCCATTTAAACCCTAATGAAGAATTAAATGTAATAAATTTATTGATGATTT  
GATTAATAAAATGGACCAAATAGAAAAAGATGAAGAAGG

>novel\_circ\_001077

GATTTGGCAAGTTTAACCTTAAGGTTATGGCCGTCTGCAGTATGATCTTTATGAACGTGG  
CTTTCAGTATAACAAGCATCGGTTTCATATTACCATCAGCGGCATGCGACTTCAGAATG  
ACCACAATGGACAAGGGACGTCTGAGTGCCGCCCCCATGTTAGGTATGTTAGCTGGTT  
CATATATATGGGGTTGCTACGCGGCTATCAAGGGGCGAAGATTATCTCTATTGGTCGCAC  
TATTTCTACATGGTATCTCCGAATTATTGGCATCGGTAGTGCCATTGTA CTGGGTTTTCTT  
ATTTTAAAATTTCTCAGCGGTGCAGCTATGAATGGGCAGTCAGCTGTTGTGTTTCTTTA

TCTGAGTGAATTCCAACCAACCAACATAGGAGTAGAATGCTCTCATGGATGGAAATG  
GCTTGGGTGCTAGGAATGATAATTTTAGCAG

>novel\_circ\_001078

TGTTTTTAATATTCCATCCAGTGGTTCGGAAGAACTGTTTCATCTTTATAACGCTGTACA  
AAAATGGGTCGGAAGAAGATTCAAATTCGCGCATCACGGACGAACGGAATCGTCAG  
GTGACCTTCAACAAAAGGAAGTTTGGGGTAATGAAAAAAGCATATGAGTTGTCGGTAC  
TATGCGACTGTGAGATCGCTCTGATTATCTTCAGTTCGAGTAACAAGCTATATCAGTATG  
CAAGCACCGACATGGACAAGGTTCTTCTCAAGTACACCGAGTACAACGAACCCACG  
AGTCTCTTACCAACAAGAATATCATCGAG

>novel\_circ\_001079

ACGTCCAAGTTTAGTCACTGGAATCCATTCTTTACTGTCTTCTTTACCACGTCCACGAC  
CACGACCTCGTCCTCTACCTCCACGACCTCTACCTCTTGGACCTCCACGATCACCTCCT  
CCACGAGAACCAAATCCTCCACGAAAACCTCCACGCGCGGCTGGAGCA

>novel\_circ\_001080

GGTAAGGTAAAGTGTACTGATCTGAGGACAAAAGATAAAAATGAGTTGCTCAAGCAAC  
TGGAAGAACTCAAACTGAGTTGACAAATCTTCGAGTGGCAAAAGTTACTGGTGGTG  
CTGCATCAAACTTTCGAAAATCCGTGTGGTAAGGAAAGCAATAGCTAGGGTATATATT  
ATTATGCATCAAAAGCAAAAGGAAAATTTGCGTTTGTGTATAAAAATCATAAATATAA  
GCCTTTGGATTTAAGGCCAAAAAAACTAGAGCTCTTAGAAGAGCATTAAACACCTTATC  
AAGCCAACAGAAAGACTCTAAAAGAAATACGCAAGAGATCTGCTTTTCCTCCAAGGA  
AGTATGCTTTAAAGGTGTAAATTGCAAGGTACTTAATATTCAAGAAATAACAGAAGCTG  
TAAAAATTTAAAGACGAATGCCAGGGTTTCTAGAAAGCACAAAGTTCAGAAGTTCATC  
ACTATCCTCACAGACAAATGGTTTTTCGATGATGGCAAGCTACATCATGCCATTTAATTCC  
ATCATTGTAAAAGTTATTCAGAATTGATAACAAGATTTCGTCGTTACCCTGCAATATAAA  
TTCATGCATTAAAAAACTATTAAAAATAAAATTTGAATAAAGCAAATAGAAAATTCATAT  
ATATATATATAAATGATTCCAGTTATAATTATAAGTGAAATTATAAGTGAAATTGAATTAA  
GATAAATTTTTTATCAATATTATCTAAACTAATAAATATTCAAATTTTCATTGCCATTAA  
TCGTTTCGAATTTATTTGTTGTGCGTATGTGTTGTATTTATAAAAAAATAATAAATTACCTG  
AGCAGCTTCACGATTATCAGGTTGTGCTTGACCATATCCACCAGTGTGACTCCAATCTC  
CAGTATTACGCTGTGTAGTTGGACCAATTTTAGCTCCTGAACCAGACCAGAACCATCCA  
TTAATGTTCTGCGGTTGAAGATCTGGTCTGTACAGCCATTGAAATTACATTTGCGTCC  
AGATGTCCAAATATATCTCACATTTCCCTATAAGAAATAAAAATTAATTTTTTAAATAAA  
AATAAAATTTAAATAATATTCGGTTTAATAATTAACCTCGTGCTATTCGTTGTTTGATAAA  
TTCATTTTCTTGCGGTGTTTCAAGAGAACTGCATCCATACAATGCCTGCGACAAATATT  
ACGAGCATCCAGCCAATCTACTTCGAGATTTCTAGTCGGTTGATGTTCCCAACTGAAAA  
AATATGAATGTGCAACACCTCTAGCATCCCTATAAGTGGCATGTCGCACCCCTAAAACA  
AGATTTATTTTTTTATTAAAAAGATTAAAATAAATCAAACGATTAAAAAACACTTACGAT  
TGGCACAACCTGCGTGGATCAGGAAGAGCAAGTCGACGTTGAGCATTACCACAATAAT  
G

>novel\_circ\_001081

CACCCAGCGCATGTGCGAATATCCCCACCATACTGCCGAGTGAATTACCGGAGCCGTC  
TGCCATCTGATTGAACTGGAGGTAAAGAGAGAGAACCAACCGATAAAACGATGCCGC  
AGGCACGCTGGTGGAACGCTGTTATCGCGAGCAGTCGGCCTAGGACGTGGGAACAAC  
TGA CTGCC TCCTCCTCCGCGGGTTCAGGGACATCGACAGGAAGAACATCCATATGTCC  
GACGACTGAAGTTGTAATCCACCGGCCGGCTACCGTCAGAACATTACACCGCGGCATG  
GCGAGCAGTCAATCTGGAACCAAAATCCTCACCGAGGATAATGTTTTACGAATCTTC  
GGAAAATGGAGTACGCAGTGCGCGGACCACTCCTTTTACGTGCTCTCGAGATCGAAAA  
GGAGCTTCAGAAG

>novel\_circ\_001082

TTAGGTGGAGGTTGTGAATTAGCAATGATGTGTGATATTATTTATGCTGGAGATACAGCA  
AAGTTTGGTCAACCTGAAATCACTATTGGTACCATACCTGGTGCAGGTGGTACTCAAAG  
ATTA ACTAGAATAATTGGCAAGAGTAAAGCAATGGAAATGGT

>novel\_circ\_001083

ATCCATCCGCAGAGGAGGACTCCTCTGGTCTGACTGGACTTAACTGGCTTCACTTGTA  
AATTTTGTGGCAGGTTGACCGAAAAGTAATATGTCTACTAAAAGTCGTTGTCAAGGAA  
ACGGATTTGTATACAATATGCTCTGAAATTTGATACGCCTCATGAAGATATTCATCTCTAT  
TAAGATACAATAAGTGGTTGCATCAACAAAAATACGAAACGTTGGATTAGTATCTATAAT  
AAATGAGAAGTTTAATACCTTATATGGATAAAATAATCAAATTATTAATGTATATCCGATA  
AAAGAAAAAGAGATTGAATTTTATAACAAGACGTGAAATAGTTTTGAACAATAATTGG  
TTACATAATTTTCAAATATTATTATGTATGATAAGCTACTTGTTATTTAATGATTTGCTTTAT  
AGTTTAATTATACAAGTGTTTACAAATACTGGGAACTGGAAAATATTGAATTAGGTATAA  
ATAATATTATTTAAATATAATATAAAAAATAATAAATATAATTATTTTTTAATTTATTGTAATTT  
CTATATATAATAATCTTAACCTTGTTTTTATAATAATATTATATATTATTAATACAAGATAATTC  
TAAATAATTTTATTTTATATATTTAAAAGAAATCAATAATTAAAAACAAATAATTAAATTT  
AGTTCTATTTGAATATCGCTCCAACCAGTGATCATCAAGAAATTAACCAATAAGAATTCT  
GTAAATTATTATTCCCAATCTTATATCATATCAACAATAGATAAAATGAAGTAATTGCTG  
ACGTGAGGTTATGTGCGTATGGTATGGCTAAAGCTGCCACGGCGCGGCGCTTTGTTGGT  
TGAGCGTGGTCAGCTCTGATTGGCGATTGCATACTAGCCAATGAGCACTCTCCATCTGT  
CTACCTTAGCGGCCACTAACTCACCAACCACATCCACGAATCGAGCATTATCGGCTAGT  
TCGTCTGAGAATAAGCATCATCGTCGATTGGACTTTTGTCTGCCGCGTGTGAAAATG  
CGATCTTTCTGCTCATTTTTGCTTCTGTTGGCGATTACAATCGCCACAGCAGAGATCTAC  
TTTGAAGAAAAATTTCTTGATGATTCCCTGGGAAAAAAATTGGGTGTATTCTGAACATCC  
TGAAAAGAATTTGGAAGTTTATTTTAGGGCATGGAATAATTCTGGAATGATCCAGAA  
AATGATAAAGGTATCCAAACATCTCAAGATGCAAGATTTTATGCCTTAAGTAGAAAATTT  
AAACCATT CAGTAACAAAGACAAAACACTTGTCATTCAATTTACTGTAAACATGAAC  
AAAATATTGATTGTGGTGGTGGATATGTTAAAATATTTGACTGTTCTTTGGATCAAAAAG  
ATATGCATGGTGATAGCCCATATCAAATTATGTTTGGACCTGATATTTGTGGACCAGGAA  
CAAAGAAAGTTCATGTGATCTTCAGTTATAAGGGAAAGAATCTTCTGATTAATAAGGAT  
ATTCGTTGTAAAGATGATATTTATACTCACTTATATACTTTGATAGTTAAACCTGATAATA  
CATATAAGGTTCTAATTGACAATGAAGAAGTGGAATCTGGTGAAGTAGAAGCAGATTG

GGATTTTCTTCCACCAAAAAAATTAAAGATCCATCTCAGAGCAAACCTGAAGATTGG  
GATGACAAACCTACCATTCCCGATCCTGATGACCAAAAGCCAGAAGATTGGGATAAAC  
CTGAGCATATTCTGATCCTGAAGCTACTAAACCTGAAGATTGGGATGATGAAATGGAT  
GGAGAATGGGAAGCTCCAATGATTGATAATCCTGAATATAAAGGTGAATGGAAACCAA  
AACAAATTGATAATCCTAACTACAAAGGACCATGGATTCACCCAGAAATTGATAATCCT  
GAATACACACCTGATCCAGAATTATATAAAAGAGATGAAATTTGCGCTATTGGTTTTGAT  
CTATGGCAAGTGAGATCTGGAACAATTTTTGATAATGTTCTTATCACAGATGATCCTGAA  
GTTGCTCGTAAATTTGGCGAAGAAGTTTGAAACCTACATTAGAAGGTGAAAAAAGA  
TGAAAGAACTCAAGATGAGGAAGAAAGAAAAACAAAGACAAAAAGAAAGCAAAGA  
AAATGAAGATAATAAGGATGATGATGATGAAGATGCAGATGAAGAGGAAAATAAC  
GTCCCTGATACTGAA

>novel\_circ\_001084

GTTTCCAAACTTCTTCGCCAAATTTACGAGCAACTTCAGGATCATCTGTGATAAGAACA  
TTATCAAAAATTGTTCCAGATCTCACTTGCCATAGATCAAAACCAATAGCGCAAATTTCA  
TCTCTTTTATATAATTCTGGATCAGGTGTGTATTTCAGGATTATCAATTTCTGGGTGAATCC  
ATGGTCCTTTGTAGTTAGGATTATCAATTTGTTTTG

>novel\_circ\_001085

ATAATAAGGATGATGATGATGAAGATGCAGATGAAGAGGAAAATAACGTCCCTGAT  
ACTGAAGAGCATGATGAATTGTAAATAATGTGTCTGTAATCGATACGAACACAGACTGTA  
TTCCAGGAGCTGTGTAACCGCGATACGCACTAACTTTCCATGAAAAACACAAAAAATT  
ATAATAGAAAAAAAAAAAAAAAAAGAAAACTAATCATTCTCAGAAAATCAACGGATTCTT  
TTAAATTGAATTAGTCAAAAAAAAAAAAAAAAAAAAAAATAGTTATAAACTTGTA AAAA  
ATTTTTTATGTCAGTGAATTTTTCGAAATTTCTTCATCTTTTTTTTTTATTTTTCTTTTATATT  
TGAAATATGGCCTCATTTTCATAGCCTAACTTTTTAATCTAATCTTCAATTATTCGATCG  
TGTTCCATGAAATTCATTAGTGAAAGGTTACATCATAAATATTAAGTGTCCAAAAAGAA  
GTCAAAGTGCTCATTATGTGTTATCAAAATACGTTATGTGAACGTAATTATATACATGGCA  
TTATATGCTGTATGGCATATATATATCAGAGTCATCTTGCCCTATGTCTCTCCCATGGCAC  
AGCTCCAGAAAAAGACTCTAAGTTGTTCCGTTTTTGTGTTGTCAAGTGTTTTTATATACAA  
TTGAAAGATAATTGAGATGTAATTTAATGATGCTATATTATATATATATAAATATATATATTA  
TATATTATTTGATTTCCGTACAGTGTACGCGCGTATTAAAAAGCTCGCTCCAGTTAAAA  
TGTAAGAATGATCGGATGTGTGCAGATATGACTGAATGAAATATAAATATAAATACGATT  
GGTATGATTATGTATTAATAAATACAAAACCAA

>novel\_circ\_001088

AATTAGAGAGGAGAGGCCATCCAGAATGGTTTTAACTGTGACCGAAGACACACCAGC  
AGACATGCTGGCCGGTAGTATGGAGCTTCTGGTCCAGTTACCTCGGGAACATCATCTTC  
AAATGCAAAGAGTCACGGTACAGAGAAGTACACCGATGATGGATCTCCTCGTGCAAAT  
CGCCACGGCTCACAAATTGACAGCTTCCAACCTATACTCTACAAGCGATTGGAGAACGT  
GGGATGGTTTTATCTCATCAACCCAATACACCAATTGGTGCGTTGGATGCACTTCAGGT  
AAAATTATTACCTAAACAGGGGACTTTGGTACCAAGAAAAGCGAAGCAAGTTAATCAA  
CCGTTTGAAACTACTTTTCAGGTTACAGGTACATCTACCAAGAAATCAATTGTATGTGTC  
GAGAGTCAGTCCCAAGATGAACTTAGGTGAGATCTTGGAAGAAGTATGTCGTGAAAA

AGATCTAGATAAGAACAAATATGAACTACGTCATCCAGCAAGCTTGGAACATTGGAC  
TTATCATTGTCACTGCAGGATTACCACTTACAGGAAGTCACCCTGTATGCTAGACAAGG  
CAGAACACTAGGTTCAGCACTTAGCACTCAGGATATAATGGCTCTTCAAAGGCAAGAA  
GAGCGACGTAGGCAGCAGGCAAAACAAGGTGTTTTTGGATTGTATTCAAAAAATCTA  
AAGAAGGTTCCCTTAAGTACAGATAGTCTTGGTGAACGTAGTGCGTCACCAGCAAGAAG  
TGACGAAACTGGAAGAAGTACGAGTCCTCTACAAGCACCTACTAGACCTCAAAGAAA  
ACGGAGACCAGCTCCAAAACCACTATTCAAGCTCAAGCAGAGATTAGTAATAAAAAAC  
GATATTGAAGAAAATTCTGGAGATTCTAGCAAAGATAAAGTGATGATTAGCCACAGTCG  
AAATAGCAGCGATAGCTCCGGTTATCATGAGGCTTCTGTATTAAGTGATAACCCAGATTC  
TGCGGGAAGACTTCCAGAAACATTGCCCAGAAGGAACAAAGTTCCTTTGGAAATGTC  
TCGGAAATTAGCTCAAACGTACAGTCCAGTAAAAGTCTAAATAATTGGCTTCTGTAC  
CTGGTACACTTAGTCATGGCATTAGCAATACTTCATTAAGTTCTACAGGATTACGAAAG  
AAAAGAGTTGCACCTCCTCCGCCAGTAACTAGGCCTTTATCATCGGCGATTCTACTCA  
AGCATTAGAACGTATAGTTGACTCTGAAGAATCCTTAACATCAGATATGGATCCTTCTAA  
ACCTCCTTCTGACATTGGTGTTCATCTAAAGCGAATTCAGATATAGAAGAACGTCCAA  
AAGCCAATTCAGATATTGGAATAACAACCTGTTAGCTCAATATTGTCTTCGAATATTGATT  
TTATAAAATCTGATACTACAAAAGTGGAATTAGAATCAAAAAGCGGCAAATCTGATCTT  
GAATCGTGTCATAGATCTGATTCTATAAATGTAAAGTTACCCAGCACGGAGTCAAAACA  
CCCTGCACCAATAGAAGATGCTCCTCTAGACGCTAGAGTACTGCAGACGAGAG

>novel\_circ\_001089

AATTAGAGAGGAGAGGCCATCCAGAATGGTTTTAACTGTGACCGAAGACACACCAGC  
AGACATGCTGGCCGGTAGTATGGAGCTTCTGGTCCAGTTACCTCGGGAACATCATCTTC  
AAATGCAAAGAGTACCGGTACAGAGAAGTACACCGATGATGGATCTCCTCGTGCAAAT  
CGCCACGGCTCACAAATTGACAGCTTCCAACCTATACTCTACAAGCGATTGGAGAACGT  
GGGATGGTTTTATCTCATCAACCCAATACACCAATTGGTGCGTTGGATGCACTTCAGGT  
AAAATTATTACCTAAACAGGGGACTTTGGTACCAAGAAAAGCGAAGCAAGTTAATCAA  
CCGTTTGAACTACTTTTCAGGTTACAGGTACATCTACCAAGAAATCAATTGTATGTGTC  
GAGAGTCAGTCCCAAGATGAACTTAGGTGAGATCTTGGAAGAAGTATGTCGTGAAAA  
AGATCTAGATAAGAACAAATATGAACTACGTCATCCAG

>novel\_circ\_001090

ACACACAAGGGGGAATGTCCCGTAACACTGGACCTGGTTTGTATGAATTCCTTATGGA  
AGCAGAACTCCAACAGTATTATCCTGGAATTCGAGGGGACTTGAAAGTACAGACAAC  
GCTCAATTGAAATATGTAACAGAAGATGATTTGAATGCAATTGGAATGAGCAAACCAG  
AAATGCGTCGTTTTAAAAAATATTTTCAAAAACATTTTCCACAAAATTATTTATCTAAAT  
TCAAAAAGATGTTACTACCAAAACGGGAAGAACCAACTACAGGTGCTTTAACTATGTT  
GCCAGAAGAAAGACAAGATAGACCACCGATTTCGTGTTCTAATAAACATATGATACCA  
GCAGATGCAATTATTGTGAACAAAGAATTAGGAACAGGAGAATTTGGAGTTGTTCAAC  
AAGGTGTTTGGACAAACGATGGTGAAAGAATACAAGTAGCAATTAAATGTTTATCACG  
AGAAAGAATGCAGAATAATCCAATAGAGTTTCTAAAAGAAGCAGCCATAATGTATGCAA  
TAGATCATGAGCATATTGTAAGATTGTATGGTGTAGTTCTAGATACAAATTCCTTGATGCT  
TGTCACAGAATTAGCACCTCTGAGATCATTATTAGAATGTTTGAAAGAACCGAGTTTAC  
GTAGCAGTTTTCTGTACTTTTCATTATGTGACTTTTCTGTACAAATCGCAGATGGAATGC



AATATTTAGAGGCAAAGCGATTAATACACAGAGATCTTGCTGCTCGAAATATTTTAGTAT  
TTTCTAAAAACAAAGTTAAATATCTGATTTTCGGATTATCTCGTGCTTTAGGAGTTGGAA  
AAGATTATTATCAAACGAATTTCAATGTAAATTTGAAATTACCAATAGCATGGTGTGCTC  
CAGAATGTATATCATATTTAAAATTTACTTCTGCTAGTGATGTATGGGCCTATGGAGTAAC  
TTTATGGGAAATGTTTAGTTATGGTTTTCAACCATGGGCAGCATTAAACAGGTCATCAAAT  
TTTAGAAGCAATAGATGATCCTAATTTTCAAAGATTAGAACAACCAGAATGTTGCCCAA  
AAGAATATTTTTCTACTCATGCAACAGTGTTGGCAACATGAACCATCTAAACGTCCCAAA  
TTTTCTGAATTAATTAATCTTTTACCTGATTTAAAGCCAGAACAAGTTCAAGCTGTTCAA  
GATAGTATGGAAACAAATCAGCTTGTTTACAGACAAGGAGATGTTATTACTGTTCTTGA  
TAAAGGAAGTAGTAACACATTATGGAAAGGTGTTTTAAATAATGGAAAACTGGCTTTT  
TTAATCCTGCTCATACAATAGCATATCTTGGATCTAATTTACCAAGTAATAAACAGGTG  
AATTCACACGTGGTGATGGCAAAAATACATTTTCTTCTCAAAGGCGAAAGATTCTGAAC  
GGATATGATTTTCATCTCCACAAGGTGATTTGAAACATACTGGTCATGTTGGATTAGATGG  
AGCTTATTTTGGTGATATCGGTTTTCTCGGCGGAAAGTATTCACATTTACCACGACAAGT  
GGTTCACCATATAAACCACAAGAAGATGTAACGGATAATTCTAGTCAAGCTTCGAGCC  
AGGAAACAAGAAGCGCGGATACAAATAGAGAATTATTGAGAGATTATAGGAATACACA  
ACAGGATGTTCAAATAAACATGAAAATTTGTGGTCAGATGTAAATGAAGTGTGCCATA  
CTGCTAATTCAAGTAAACAGTCTGTTCCATTAAATATGGCTAGCAATAATGATCTTGGTG  
CAGATCATGAATATCATGAAATAAGTGATGAAGAAAATCAAGATAGCCCATTAAGATTT  
GATAAAACATTAAATTTTGATTTTGGTCCAAGTTTATTAGCTGAAATGGATCAAATGTTT  
AGATCACTAGGATCTTCTCCTCCTCCACCACCTCCAATTCATCCTTTATCAACTGAACAC  
GAATCAAGTAATGTTTCGAAATGAACTGAGAGAAATACAAGCAAAGCAGAGCAATAAA  
AAAAAGCAAGCCACCGTGAAGCCTATCTCAGCTGCCGATCAGAAAACTCTCTACTCAG  
CCATTGCTATGGCACAGGAATTGACAGCACGTTCCATGACAGATCTTGAACATCCACCG  
GAGTCTCCCCGAACACCTGCCAGTCCCTCAAGACGCAGAAAGTTCTCTTTTAAGTTGC  
CACATCAACACAGTCCCAAACCAGACAGACGACACTTTTCAGAAGAAGCTGCCAGTAT  
ACCTGACATACAG

>novel\_circ\_001091

GAAGTGGAAGCAAAGATGGAAAAGGTGGGAAGGATAATGCATCACCGTGTGGTCCTT  
ATGCAGCGGCTGAGTGCGGGGACGCGCCTAAAAAGAAAGGATTCTTCAAAGGTTTCT  
GGAAGAGGTTCGCGTCATTATTCATTGGAGAACCAATAGCCCAGGTTAGGCAGTAGGGT  
GATGGGCCACCAGCAACGGCAGACATCGCGGCAACAACACCATTATCGACAACACGT  
CGCTACAAGCGCTTTGACGCACAGTGCTTGTTGCTGCATCGTCCAATAGCCTCGGTCCC  
GTTTCGTGGTAGAACCAAGCGACAAGGTTTCGCGTTCTTTTCGTCCATTTTCATCGAGCTTTT  
ATTCCGCCCCGATCAGTGGTCTCCGAATACAACAACAAGCTACGTCAATCCGTGG

>novel\_circ\_001094

GAAGTGTGTTAGAGAAAGTTTAAAGGGATAGAAACCTAAAAAAAATGGAAAGGGCGT  
GAAAGAGAAAAAAAATGATGAATGATCGAGTAAGAAAGAGGAAATGTGCGAATGAG  
AATAATAAGGGAAAAAGGGAGGTAGCGTGGAAGGATTGATTTTAAAGGATTGAACGGC  
AAGAATCGGAAAAACAAGAAGCGGTTGTCTAAAGGTATGTCTG

>novel\_circ\_001095

AGAAAGAGTGAGCGAAATATGAAGAAGGATGAAAGAAAAAGAAAGAGAGTGAACGA  
GAAGAAGTGCGAGGAAGTGTGTTAGAGAAAGTTTAAAGGGATAGAAACCTAAAAAAA  
ATGGAAAGGGCGTGAAAGAGAAAAAAAATGATGAATGATCGAGTAAGAAAGAGGA  
AATGTGCGAATGAGAATAATAAGGGAAAAAAGGGAGGTAGCGTGGAAGGATTGATTTTT  
AAGGATTGAACGGCAAGAATCGGAAAAACAAGAAGCGGTTGTCTAAAG

>novel\_circ\_001096

AAAAGTATAGAGTTTACGCGAGTATATCCTTTGCTGTACTGTTATTGGGCATCGGAGTTC  
CTCTTTGGTGGCATACTACTGCAGTTCCGCGTGTACCTCTTCCTTATGATGGAATTGAGC  
AACTTTCCAACCTTAGAAATCAACATTAACAAAACAACTCATCATACTAGCTCTTTCTCGA  
GATCGTGCTGAATTGTTGGTTCACGATATAAAAGAAGCTTTCAAAAATGCCAGTATCTG  
TCAAGTAGAGATCATTATCGTGTAATATCCAATACTTTTCGCATTTACGCATCATCAACTG  
GAGAAGATAGCGTCCAATTTTGATGTTGACGTAGGGCAACTTTTACTCTTTGAAACAAC  
TAACTTGAATAATGCAGTTCTCGTCGGTTCGGAAAGAAGTATTTATTTTTCTACCGAAAC  
CACCTCTTCCACTTTGATACAGATATTATCGGAATGGATGTTGCACGAAAATTCGTTGGC  
TTTAACAAAGAATGCGCTCACCGAACCGACCTTTATAGCTTAGATGAGAAGAATAGA  
AGAAGATTTCCTGCTAGTTCGGCATACGATATATTGATCACTGTAGTTAATCCTGATCCA  
GAGAAATTGAAGATTGATTGGAATCTTCGCGAGATGGTCGAAG

>novel\_circ\_001097

AAAAGTATAGAGTTTACGCGAGTATATCCTTTGCTGTACTGTTATTGGGCATCGGAGTTC  
CTCTTTGGTGGCATACTACTGCAGTTCCGCGTGTACCTCTTCCTTATGATGGAATTGAGC  
AACTTTCCAACCTTAGAAATCAACATTAACAAAACAACTCATCATACTAGCTCTTTCTCGA  
GATCGTGCTGAATTGTTGGTTCACGATATAAAAGAAGCTTTCAAAAATGCCAGTATCTG  
TCAAGTAGAGATCATTATCGTGTAATATCCAATACTTTTCGCATTTACGCATCATCAACTG  
GAGAAGATAGCGTCCAATTTTGATGTTGACGTAGGGCAACTTTTACTCTTTGAAACAAC  
TAACTTGAATAATGCAGTTCTCGTCGGTTCGGAAAGAAGTATTTATTTTTCTACCGAAAC  
CACCTCTTCCACTTTGATACAGATATTATCGGAATGGATGTTGCACGAAAATTCGTTGGC  
TTTAACAAAGAATGCGCTCACCGAACCGACCTTTATAGCTTAGATGAGAAGAATAGA  
AGAAGATTTCCTGCTAGTTCGGCATACGATATATTGATCACTGTAGTTAATCCTGATCCA  
GAGAAATTGAAGATTGATTGGAATCTTCGCGAGATGGTCGAAGAGTATGTCGAACCCT  
TTCTCGATGAGGTTTCAATCTTGAGTAATTTTTCGGTGAAATCGCAGTGGTTGTATTTGT  
TACCTTTGGACGTGACTCCGAAACGTGTACCTGATAGTAGTCCGTTAGGTAGACACTTT  
GCATTGTCGGAAGACGTTTTGCCACAATAATCACGCCGTTGGAAAAGAAATTAGCCT  
CGCAAGTTAGTCTTCGATCAACTATCAATTTCGTCATCTATGTTGTTTCCTTGCGATAATG  
CTCCATTGTATATTACACACGTTCTGGTCATCGATCAAAAATTAACGCTAACGTTGAAG  
CATTTCTTTCTCCAAGGTGGGGTGGTGTAAATTAATCAATCCACCCGTGGAAACTTGTA  
TGACTGTGAAATCTGATGAATTAGTTACCATTGTTTCCTGAACAGACTATAGTTGTTGGA  
ACATTTCTTACGCAATTGAACTTCTCTTAGGTATTCCCGAGCCGAAATTTTTGAATGGT  
GTTACCATTGTTTCCTTTACCAGGATTGAACTACATAATTGGGAAGTTGATGCATTGCTA  
CGTGACGCACGATTGAGCAATTAACATCAGCAAAATTGACCTTGCAATCACTTGCTCG  
ACTTCTTCAAGAAATTGGTAACATTGTGATCACAGATATTGTAGGAAATAGAATAAAAA  
CGGCCTTGAGTTTAGTGGAATAATCAGCTCAACAATTAACACAGGGCGATCTAGCTAC  
AGGTTTCTTATTGAGCAAAGAAGCATTACCTACCGCAGAAGCAGCATTTTCCGATCCAA

CACTTTTTGCTTTGTTGTATTTCCCTGCAGATCAAAAATATGCTGTATATACACCTTTGTT  
TTTGCCAACTATGGTACCAGTCTTGCTTTCCTTAAAAA

>novel\_circ\_001099

CCGAGGCAACTCGCTACGCGAGCGACTGGGTCCCGATTTTCCGGACGCGGCATCATCC  
CGACACGAGAACGACTGGACCGTCGCCACTGGACATCGTCGATATACAACGGCCCGGT  
CCGACAAGCACACACACAACCCTCGCTCGGTGTGGTATCGGTCGTCTCGTGTATTTTCGT  
CCCATCTGTGCGCGCACGGCGTACGTGTCTGCGTGTCCGTCTGTGCGCGCGTGTACCC  
GCGTACGAACGATAATGCTGGCGGCTGACGGTTTCGGTGATCGACGACGACGCGGCCG  
GTGAACTAGTGACAGTGTGAAATCGATCGTCAGCGGGGAAACCGGCTAGCGGTTCGGC  
ACTAAATATACCCGAGGAATAATGGCCAGCGCGACAATGGGACTCCGTTCGACAGAGTGC  
CAGTGAACAATTCCCCGACCCCGTCGGGACAATCCGCGTCGGCCACTGGCTCGTCCAG  
CAAACGTTCAAGGTCCGAGAACACAACAGCCCGTCCCACGGTAATCTGAACTCGAT  
GAACGCGAGTGCACGGGACGAGCCACCTACCAAGAAGTCACGTGGTACGTTCGACGAA  
CGCGACTAAAGCGACATCTTCGTCTCTTCGAACGCGTCCTCCTCGTCGCCCCGAGACG  
AGTCCCTCGTCGAAAAATCGCGGTGGTTCTGTGTTCGAGGTCCGGAACGCGCAAACG  
AAAACGTCCACGGCATCGGTATCCACGACGTTCGGATCCCGTGTCCAATAACAGTGTGC  
TGTCCAGTAGTTGGCAAACCACGAACATGTCCGATGTGTCTACGTACGCTTCCGTGGCT  
GGATTGAGCATGGCCTCGAGTCCAACCGCCGGTCTGTGCGCCGGCAGCCTCAGCATGC  
CCACCCCGATACCGTATATGTCTTCGTCTATGGCCACGTTTCGTGGGAAACGCGACGAAC  
CTGGGCAAGAGCTCGTCCGTCTCGTATCTGGACATTTTCAATATGACCGGTGGTTTCGTT  
GAGCTCGGCCGCATCCGGATTGAACAATGCCTACGTTCGGGAATGGAAACGGTGGTAGC  
GCGATGGACTCGAAGAACGGCGTGCCCATGCCGTTCTCTGGAATCGCGACTGGCGTAA  
ACGGGGCCGGTTACGGGATGCAAAGGGACAAGCGGAGAACGCGAGCCTGCCGAAG  
AAGTTTCAGAACGATAGTATGTTCAACGCGTATCAACCGTGGGTGATCAAAACGTACG  
GCGATTTGGCCAAGACTAAGACGATCACGATTAAAAAGTACGCGCGTATATTGCGAACA  
TTGAGAGGTGAGGAAGTGAACAGTGCAGGAGAACAGTAAGTTTCGATTCTGGGTGAAG  
AGCAAGGGGTTCCACATCGGGCAGCCGGAAGGATACGACGCGAAACCGGCGGACAG  
GATTATCGGACGTCACGCGGTGACGAGTCCCGGATTGGATCCACCGTTGTACGTGCCC  
ACACAGTTGCCGCATAACAAG

>novel\_circ\_001100

GAAAACATCTCGACCCCGAGCCAGCCGACATATCCGAGGAGGATCACTACTCGAGCG  
CGTTCATGAAAGACGCGGATAAGCTGAAGCTGATGCTGCTCGCGTGGAATTATAATCTT  
CAACAGCAGGCTCAGGCTCAGGCCAGGCCAGGCACAGGCCAGGCCGCGCAACGC  
GGCCCTCTCGCCAAATAACTCCTCGACAACCACGGCCACCACCGTTGGCACACCTGTA  
ACCAGCCAATCAGCCATATCCACGGCAAACAACACCATTAACAACCTCCACACTTACAG

>novel\_circ\_001101

GCGCGCTCATGAAAGACGCGGATAAGCTGAAGCTGATGCTGCTCGCGTGGAATTATAA  
TCTTCAACAGCAGGCTCAGGCTCAGGCCAGGCCAGGCACAGGCCAGGCCGCGCAA  
CGCGGCCCTCTCGCCAAATAACTCCTCGACAACCACGGCCACCACCGTTGGCACACCT  
GTAACCAGCCAATCAGCCATATCCACGGCAAACAACACCATTAACAACCTCCACACTTA  
CAGACTCCCGAAACGGGTCATCAGAGTTGGTGGACATGCCGGCCGGAACCGTTCTTAA

TTTGGGCGCGGTTGCCGGAGTCGGTGGCGAGGACATGGCATCCTTGTGGGCATCCTAC  
GCGATGGGATTAAAGAAGACACCGCCGCCGGCGTCCGCGGCGACGCCCTCGCGATCG  
GATCGTGATCGCGAGTCCAGCCCCCGGGGAGGGGACGGGGAGCGCGCACGACGA  
GACGAGCAGCAGCGGCAATAAGGAGGACGAGGACGACGACGACGAGGATGCCGACG  
AGAGGTTGGACCCCAGACACCACGACCCGGAGCGCCAGAAGGCTTTCAACATGTTTCG  
TCAGGCTGTTTCGTCGACGAGAACTTGGACCGTATCGTGCCCATCTCGAAGCAACCGAA  
GGAGAAGATACAGGCGATCATCGACAGTTGTACCAGGCAATTTCCAGAGTTTGCGGAG  
AGGGCAAGGAAAAGGATCAGAACGTACCTGAAGAGTTGTAGGAGGAACAAGCGTGG  
CAGGGAGGGCGCACCTTGGGACGCGGCGAGGCCCACTCCGGCGCACTTGACCTCTGT  
GCAGGCCGAACAGATTCTGGCAACGGCCTGCGAAAATGAGAGCGACAACGCGAAAC  
GCATGAGACTCGGTCTGGAGCCCGTCTCACAACCAATGCCAACTCTTCCGGCTGCGAC  
G

>novel\_circ\_001102

ACTCCCGAAACGGGTCATCAGAGTTGGTGGACATGCCGGCCGGAACCGTTCCTAATTT  
GGGCGCGGTTGCCGGAGTCGGTGGCGAGGACATGGCATCCTTGTGGGCATCCTACGCG  
ATGGGATTAAAGAAGACACCGCCGCCGGCGTCCGCGGCGACGCCCTCGCGATCGGATC  
GTGATCGCGAGTCCAGCCCCCGGGGAGGGGACGGGGAGCGCGCACGACGAGACG  
AGCAGCAGCGGCAATAAGGAGGACGAGGACGACGACGACGAGGATGCCGACGAGAG  
GTTGGACCCCAGACACCACGACCCGGAGCGCCAGAAGGCTTTCAACATGTTTCGTCAG  
GCTGTTTCGTCGACGAGAACTTGGACCGTATCGTGCCCATCTCGAAGCAACCGAAGGAG  
AAGATACAGGCGATCATCGACAGTTGTACCAGGCAATTTCCAGAGTTTGCGGAGAGGG  
CAAGGAAAAGGATCAGAACGTACCTGAAGAGTTGTAGGAGGAACAAGCGTGGCAGG  
GAGGGCGCACCTTGGGACGCG

>novel\_circ\_001103

ACTCCCGAAACGGGTCATCAGAGTTGGTGGACATGCCGGCCGGAACCGTTCCTAATTT  
GGGCGCGGTTGCCGGAGTCGGTGGCGAGGACATGGCATCCTTGTGGGCATCCTACGCG  
ATGGGATTAAAGAAGACACCGCCGCCGGCGTCCGCGGCGACGCCCTCGCGATCGGATC  
GTGATCGCGAGTCCAGCCCCCGGGGAGGGGACGGGGAGCGCGCACGACGAGACG  
AGCAGCAGCGGCAATAAGGAGGACGAGGACGACGACGACGAGGATGCCGACGAGAG  
GTTGGACCCCAGACACCACGACCCGGAGCGCCAGAAGGCTTTCAACATGTTTCGTCAG  
GCTGTTTCGTCGACGAGAACTTGGACCGTATCGTGCCCATCTCGAAGCAACCGAAGGAG  
AAGATACAGGCGATCATCGACAGTTGTACCAGGCAATTTCCAGAGTTTGCGGAGAGGG  
CAAGGAAAAGGATCAGAACGTACCTGAAGAGTTGTAGGAGGAACAAGCGTGGCAGG  
GAGGGCGCACCTTGGGACGCGGCGAGGCCCACTCCGGCGCACTTGACCTCTGTGCAG  
GCCGAACAGATTCTGGCAACGGCCTGCGAAAATGAGAGCGACAACGCGAAACGCATG  
AGACTCGGTCTGGAGCCCGTCTCACAACCAATGCCAACTCTTCCGGCTGCGACG

>novel\_circ\_001104

GTGGATGGAAGGAACTGAGAGCTTCTTCAGAGTTACTTCAGCTCTGAGTCTGCTGTAT  
AATCGTCGTACGAGAAGAGAGATATATATAGCGAAGGAAGATAGGATAGACGGTGGTT  
CCCTGGTCGTAGCGTACGTCACTGGGAACACGTGGTGTGTTGTGATATGATGTACCATC  
GGATTCCACCGTTTGGATACGGTGCCTCAGTCAGTGACCAGTTTTTGTGCGACTTGGC

GATCGTCTGTGTCTTGATGATCACAGACGAAGAAATTTACACGAGGTTGTGAATATTTG  
TTATTAAACGGATATTTGAAAGGATCGAGAGAAGGGGATTTCGGCTCGAGATCTTTCTCG  
AGATCTTTTGTGTTGGTGTATTTTATATATACGGTGTGATTGTGGTGC GCGTGT TTTGAAGG  
ATACTGTACACCGATGCGATGCGGTGTGTATCCTCGTCGTAACGATTCGAAACGATCAA  
TTACTGGGAAACAGTTGATTAAGTGTATCATTATGTGAATATGTCAGTGGCCGCCGGTG  
GGTTTCTCCTCGGAAAGACCGAGCCTATTGTTGTCTATTCAACGTTTCGTGACGTTGGTT  
TAAAACAATCGATTGCTCGAACACTTTTGATCGACTCGAAGAAGAAAACAGACTTGT  
TAATTGGAATGGTGATAAACGAGGAAAGGAAAGAGGGGGAAACATGAGGAAAAAGA  
ATCTAAGAGTGGTGCACAAGCAGGTGTACGATCGCGTGCAGATCCAGCAGGTACACGA  
ATTCGATTCACCAGCCACGTGGTTGGTTTCCTTAGTATTTTTTTTTCTTTTTTCTTTCTT  
TTTTTATCAACACAGCGATCGATCGATCTCCGCGCCAAGCCGATCCCGATCGCCACTG  
GCTAAAACTGGGTCAGAATGAATTA AAAATCTGGAACGTGAGAGATAAATTTCTCGCG  
CGCGTGCAGTGGAAGGGGAGAGTTTGTGCGGACCAATCGCGACAAACGTTATTACAGT  
TCATTTACAGGGTGATCCAAAAGTCGTGCCCTAAAAAGAAAAGAAAAAAAAGGCTC  
GATTCGTATTACGATTTTTTCCCTTCTTTTTTCTTCGAATTTCTCTTCGAAATATCGGCA  
CGATTTTCGTAATTTTTTGCAAAATGTTAATTA ACTGCATACTGTTTCGT CATAGAAGAAT  
TTCTTATTTGGTTTATTCATTTATTTGTTTGT TTTATTTTGTTCGTTCGATCTTTTTTTAAG  
ATTTCTACCCGCAATAAACCGTATGTCAATAAACTGTATGTCACATTGCTAATTATAGTC  
GATTGTTTCGAGTCACTATTTATTGATACGGATATTT CAGTTGACATGAAATATTGTTAATT  
ATAGACGATTACATGAATCGTCTGCGCTGTTTATCGTCATGCGTACTTACTCATGGACGT  
GCTTGTTAATAAGACGCACTTAATTCCTTCAAGCAAAATCCGATAATCGTAAATTTCTGTG  
GAATTTTCATTATTTCAATGATGAAAATCGAAATATAATTTAGCGGTGAAACAAGCGGC  
GTGTGTTAATAATTTTATTCGCGCGTAGAAATGAATAATCGGGAGGGGGGAAAAAAAAA  
AATCGGATAAAATTATTGCTCGTAAAAAATATATATATCCTTACGTCAAATTAATCGAGG  
AGGGGGGGGCGGGGAGAAAAAGAAAAGAAAAGAAAAAAGTATAGTTTAAATATACC  
TATCGTTAAATTTGTAGCCATTTATTATTGCCAATTA AAAAATTTGCAATAAAAAAAAA  
AAAAGAAAAGTCATCGAATTACTTACTTTTAAACGGCAACAATAATATTAATAATTAT  
TATTGCCACAGAGATGTATTATCCTTCAGCCATCAGCCATATTCCCCAGAAAGTAAATAC  
TCTCTATTATTATTCACCTCTTAATATTATCATATTAATTAAGGAATGTTAAAAAATAATTA  
ACCGACGTTAATAATAATTATTAGAAGCTCATCTCTCTCTCTCACTCTTTGACTTATCT  
CCAAAGTACGAAACACCTCAACCGTATTTTCCACCGGTAATCCCGCTTTGGAGAGCTA  
AGATCGAGCGGTTGTTACAGCAAACGGATGTCCGGTCAAGTTTGGAGCATTTCTCGAG  
TACACCGGTGAAATCACTTCCGGGTAAAAGGGAGGATACACCACCGGCATCGCTAACG  
TCCCTGGCGCCGCTAACCAAGTTTGGCGAACTTGCCCAGCAGCACTCTCTCCTCCACAC  
CCCTGTCCCTTGCAACCGGCGTCGAAACTGCTCACCCCGGCGGACAACAAGGGTCTCAT  
GAG

>novel\_circ\_001105

AGCGGATCTTCTATGCCGTTCTCCACCGACTCGAAACGGGGGGAGAGAGAGAAAGAG  
GATTCGTGCATCAAGATCGGATCGATTCTCAAGAACGAGAAAGTAATGGCCCATGAAA  
ATTCACGAGGTACGGAGCAGGGAGCGATAGGCTGCGTGTGAAGGAATATCCGTGCGTC  
GAAAAGGACAATTAGACCCTTTATCCGGCCAGGTGAAATTCGAGGATGGAAAAGAGC  
GGTGATGCAGACGTGGAAGGTGCAGTCGCAGTGAAACGACCG

>novel\_circ\_001106

GATGGTTTTCTGTGATATCTGGGAACAATACAACGGGCAGTGCAAGGGTGTACAGAAG  
AGTAGATTCATTGGTACGAGCAGGGGTACCAGCGTTTCTTTTAGCCGCACCTTTAAGGG  
CATACATCTTGACCCACTCGAAAATGGAAAATGGCAATCTACGAGCTCATTATACAAAG  
ACCACGATCAGAGCTGGAGAGATTCTACGATTAATAGCGGTTTTCCAAGACACGAGGA  
AGTGTAGTACGGTTTCCTTCGGAATTTCTGGCAGCTCTTCCGAAAAGGATCAGTACGCA  
CAATGTTTGGATCCACATGGTCGTGAGGTATTCTGCTTCTTTGTCTGGCAAGAGGGGAATT  
CTATGCTATTTGCCAGAATGGAAGTATCGATACCGGAAGCGATGCAGTATTGTACAAAG  
TGCATCATCTTGCGAAAAGACCATTGCCTCTCAGGGTTCGCTTAATAGCTGGTCCATTA  
CCTGTACCATTGCCAAGGGAATATGGCGGCTTAATGCAACTGGAAAGTTGCGACTCGAG  
GTCCAATTGTTTTAGGATGCATTGTACCGGAAAGACCAGTTCACAATCCTGAAATGCTT  
GAGCTGGTTGTGACCGGAAATGGTGCACCAAGAGTGAGAAGAGCACGATTAGGTTAT  
CCATCAGAAGCTAGACTTCTGGCATCACCGAAAATGCAACGATTATTATCTGCCTGCAG

>novel\_circ\_001107

TTCAGAACTTGAAGAATCTGATCTACATAGTGAACTAATAAAAATTATGGAGAATTTG  
TTGAACATCCTTTTTCTTGGGAATTTGAATTACCACCTTCAATGATGCTTAGCTCTAACT  
GTGCTTCATATGATCGTGTTCATGTACTATATGGACACGACGTGATATAAAAAAGGCTG  
AACTATCAGTGCTGGATATCAGTTCGGCTATTATTGCTAGAGTAGAATCAATGCCTGAAA  
GTATGAATTACTTTTATGGAGGTCTAATGCTTAGTGTGGTATTATCTTTAATACCATCTATT  
AAACGATTGAGCGATCACGTTGGAATGGACAATAGTAGCAATGTAATAATTCCTTAAT  
ACCAAATGACTTAACTTATGTCAATTTGGAAACATATAGCGATATTTTATCTAAAGTTATA  
GATTTGGCATTGGAACAACCTCTTG

>novel\_circ\_001108

AGGTGGGAACAGTTGGTCGTATCGAAGCTGAAATGGGAATTATCCGCCGTAACGCCTG  
GTGACTTTTTGATGCACATCCTGAGCAGACTGCCAGTACCACGTACTTGGGATCCAGTA  
ATGGTCAGAAGGCACGCGCAAACCTTTCATCGCTCTTAGTGCAAGAGAGTACAAATTCT  
CGATGTACACACCAAGCATGATAGCGGCAGCGAGCGTCGCGGCAGCCCTTCACGGACT  
CGATTGGACAGGGAAAAGCGGTTACGGACTGGCCGGCCTCCTCGACGAGCTAACTCG  
CATCACGGCTATCGAACAG

>novel\_circ\_001109

GTATACGCACGATCGTAGAATCATAAAAATCATCGATAAACCGAGCGCTTCGAAAACAC  
ACGTTGTATATATTCAGCTTCGCTCGAGGCGGAGCGACAGAGCCTCGTTGCACGCTCGT  
TCCAACAACCGACCGTGTTCCGTGTTTTTAAAAAAGCGCGGGAAAAAAGCATCGGC  
GAAATTATCATCTGTCACCGAAGCTCTCGAGGTGTTTCGAGGAATCGGCTCGATCCAGC  
TTGCAAGAAAGTCGACGTTCCGACGACAGTTGGCGGTGGGAACTGATTGGTGAAGAA  
AAGAAAGGAGGGAGGGGAAAAAGGAAAGAAAGAAAGAAAGAAAGAAATCTG  
GGAGGAGAAGAGGAGGAGATCCTCGTTGAAGCGGATCATGCGGATGATCGTCCGGTT  
GACGATCGTCTCCTGATCGTTCATTCTCGTGTCTTGTTTCATTCAAACAGTTGTGGCCGC  
GTTATGCAGTGATATATCCTCCCTTGAGAAAGCTCCCGCGATTGTGAAAGAGGAAGAAT  
CATGTCGAAGAGTGGTGACTCGTCGGCAGGTACCACGAAGAACCCCGAGCACGAGAG  
CGTTACTTCGAGGATGGAAGCGACGTGGAGACGATCGTTGAGGAGCCAATTGTCATT

GAAGAAAGGAACTACGGATCGACTTGTACACATTATCCAAGGACATTGACGATTTTCG  
ACATGAGGGATTTTAACGAGCCAGCTCCCGATTACGACGAGGACAGAG

>novel\_circ\_001110

TAAACCTGGCAGACAGCGGAGGCCAGAGGGTTGACATGACGCACTTCGATCTTCTGA  
AAGTCCTTGGAACCGGAGCTTACGGAAAGGTGTTCTGGTGCGCAAAAGAACTGGAA  
CCGATGCAGGCAGGCTCTACGCCATGAAAGTCTTGAAGAAAGCGTCCATCGTCCAGAG  
AAAGAAGACGACCGAGCACACCAAGACGGAGAGACAAGTTCTGGAGGCCGTTTCGGG  
ACAGTCCTTTTTTAGTTACATTGCATTATGCCTTTCAAACGGACGCAAAGTTACATCTGA  
TTT TAG

>novel\_circ\_001111

CGCGTTCAGATTGGCGGAAGAGAAAAGCTGAATGGAGGCACCGGCACTCTTGAGGAC  
CCTTGCGCTTCTCACGATATGGCTGCTCCAGGTTGCGGTGCCGGGCGCCGTTGCGTCCT  
ACACCATCGGCGTGGGCAGAGCGGACACAACCGGACCCGTTGCTGAAATAGTTTTTCAT  
GGGCTACGCGAAGATCGATCAGAAGGGATCAGGACTCCATCTCCGAACGTTTTTCACGG  
GCATTTCATCATCGACGATGGGGTGGAGAGGTTTCGTGTTTCGTCAGCGTGGACAGCGCTA  
TGATAGGAAACGGGATACGTCAAACGGTGGTGGAGAATCTCCAAAAACAGTATGGCGA  
TTTGTACACGGAGAAGAACGTCATGATCAGCGCAACCCACTCGCACTCCACCCCTGGT  
GGATTCATGTTGCACATGCTGTTTCGATCTCACGACGTTTCGGTTTTCGTTAGGGAGACGTT  
CGATGCCATGGTGAATGGGATAACCAAGAGCATCGAACGTGCCATAACGCCATGGTG  
CCTGGTCGGCTCTTCATCACCCATGGGGAAGTTCACGGCGTGAATATAAACAGGAGCC  
CGTTCGCTTATCTGAACAATCCAAAAGTGGAGAGAGACAAGTACAGGGACAATGTGGA  
TAAGATTTTGACGCAAATACAATTTTACAAGAACGAGGACAACAAACCGTTGGGTGTA  
ATTAATTGGTTCGCCATCCATCCGACTAGTATGAACAACACGAATCATCTGGTGTCCAG  
TGATAACATTGGCTACGCATCGGTTCTTTTCGAGAGAATAATGAACAATGATTCACTGAT  
TGGCAAGGGCCCATTCGTGGCAGCCTTCGCCTCCAGCAATCTCGGCGACGTTTTACCC  
AACACACGTGGCCCGAAATGCGAATTTTCCGGCAATAATTGCTCGAAACAATACACTT  
GCCCAGGGAGAAAGGAGATGTGCTTCGCCTCTGGACCAGGGAGAAACATGTTCGAAA  
GCACCAGTATCATAGCCAATAGGATGTTCAAGGAATCTTGG

>novel\_circ\_001113

GTGAGTGTGCCATATTTTACATCAACGTATCTTATCTCCCCACTTACTGGTATGTTAGAAT  
AATTCTATTACAATTATTTATCCATTTAAGAAGAAGAAGAAAAAAGACACTCCCACTGA  
AGTACGTACAAATTTCCATACTCTATTTAAATCACTCTCACAGATCCGAAAAAGGATCC  
CTCTACAGCCAATCAAGATTCCATTTAACAACACTTTTCCACCTTATCCGATCACTCCGC  
TCGACCACTCCGTCCATCAGCTAGAAAGGGGACCAGAAAAAAAAGGAAAAAAGAGA  
AACTCTCGACCCAACGATATTTTTTTTCGTAACGCTCTATTCTCGTCCATCCTATCCGAAC  
CAAGATGGTGGGTTCGCGGAGCGTAAATACGAACGATTAGCGTGTCATCCATCATCCAA  
GTTGTGACGTTCCGTAACCGAAACATTCGTTTCGAACAACGAACTCTGTCGCGTTTTTCG  
TTTCCCCCAATGAACTTGGGGCAGACGCCCCCTTCCGGTCGCTGGGAACGAGCTTTTT  
ATCGCTAATCGGATTTTCCGAATTCCTGAAAGTCGCGGAGATAAATAGATTCTTCCACC  
GATCGATTCCAGGAGGGAGAAGGATAGATGTAATCGAAGATCAACGTTTGCAATGAGA  
TCGGCGATGACGAGGGGAAGGAAACAGAGTGCAATGTCTCTTTTGAAGGCTCGTGCG

ACGAAGGATTGCGTTGTAGACGGCTCTGTTTCTTGTTGAAGATTGTTTCCG

>novel\_circ\_001116

CAAATTGCAAAGTGGGCGGGAACAAAATCGACATGGGCGACTCGTTCAGCGTAAAGG  
TACCGAAGAAAGAGGCTGATGTTATTTTTGTAATCGAACAAACAGATACCGAATGATAAA  
GTGTACAAGGAAATGATTACACCTTTAATGTCTGAACTTAGGGAGGAATTGAAACAAC  
AAGGAGTAACAGACGTGCACATTGGATTAATCGGGTACAGCGAGATGATGAAATGGCC  
ACAACACTTTACATTAAATGGCGATACCAACATAGATGGTGAAGTCAAAAATATGAAGT  
TTGAGGAAGGAAAACCAATAATTTCTTACCAGGAAGCGAAAGAAGGCAATACGGAAA  
AAAAAATTGATTATCTACACCAGAGAATGGATGTGCAATTAGGTACTTTCAAATTGACC  
GATGCTTACGAGGCAGCTATTCGATATCCATTCAGACCTGGTGCAGCGAGGGCTGTGGT  
CGGAGTGATCGCGAACCCCTGCGAGAAGAGTCCATTCCCCATTTCG

>novel\_circ\_001118

GAGTATTACGGCCGCGTTGGCGTATTGGCTAGCGGGAGCAAGTACAAACCGATCATGG  
AGTACAAAGTGCCGGAGCACATCGAAAAGTTGGCCAGCTCGAAAACCTGGTCTTCCTTC  
GGGGCAACAGTACTATCTGGACGGGAGCGTGGACGTTACCGACAATCAAGATGGAAA  
GAAGTTCAACCTCGAAAAGGTGGCATTTCGTGCTCAATGGTCAAAAGTTGATCGTGATC  
GACGGCCCCGTAACGTGGACCAGCAACAGCGTCAACGTGGACACGAATATCGGTTAC  
GGGGACAAAATCTGGCCTTCAAACCTGGATGGTCAGTGCTCCAAAGACGATCACAGG  
CTCGTAGTGTCCGCCATGCCGTCCAGCGATCCCAACATCGGTTTCAACCTGAACTGGC  
AATTGAAGAAGACCGACAACAACCTTGAGAAACAAATTCTACTTCGTCCACGGTCCTGA  
TCCAAACTCTCAGACGAATCGCCTTTCCTTGACGCAGAAAGCTGTTTACAAGCTGAAC  
AACAAGGAATTCTTCTTATCCGTATCCAACGAGCTCACCTATCCTATCGTAAATTTGAAA  
TTAAAATACGAGGGAGAACTGACCCAAAAATCGGTCAGCAGCGACCTCGAATTCAAGT  
ACAAGGAGTTCAATTTCCGTACGGAATTGTCTGCCAAGGTGGGGACGGAGAAGCCCCG  
GTGATTACGAGGTCGAGTTCGAGGCTCAATTAATGGAGAACGGGATCGAGTTGAAGGC  
GAAGCGGAAGATTTTGGACGGGCAGAAGAGTCAATTCTCCAATTCCCTCGAGTTGAAG  
CCGAGCGGTAAGTATACCGCCGACGCGGTTGTGCTTTACAGCAT

>novel\_circ\_001120

ATACAACGTTGCTATCCAAGGTTGAGCCCAATCCCAACGAGTCGATCTTGTACGACAAT  
TCGTTGTTGAAGGAGTACTTGCGGAAATCTTCCGGGAATTTGACGCGAGGTTTGATCA  
ATCCAAACTGATTCTTGGCGTTCAACTTGTCCGGATCTGTGACGCTCTGAGATTCCTC  
AGATGTGTCTGGATGAACGATCCGACTTGATTCACCGTCTCCTTGTCCAACACCTCTTT  
CAACTGGTTGGCAGCGTGCGGACACGGGCACGCGACCAACGACAGATACGTGTTGAT  
CCTGATTTTCGCTGTCTCCTCCCGATCGGCCAACACTTTGAACATCACGTTCTTCCA

>novel\_circ\_001122

GAAAGGGGAGTCGAGAACCTTTGATGTGTCGTTGGGAGGAATATTGGGAGGAAACGC  
GAGTCTGAAACGGATGTGCAGACGGATGTGCAAAGTACCGTGTGCTACGAAACGAGT  
CGAAAATTGACTCGAGAGGGGGGAAAATTGTTGATACTTGGCGGTGTACTCCCCCCCCT  
ATTGTTTGCTTTATCACTGTGTCATCCGCGAGGGGAAAACCTTTCCTCTCGAAGACGTG  
GCGCTCGATGAAAGAACACGGGCCCGCCAAGTGGAAGGCAAGAGAAGACAGAACGG



AAATAATCGAACGCGTCGTTTTGAGAAAACGTCGTTTTCCCATGTAACACGGAAGCCTA  
CCACCGGTTATCGATTGATCGCCGGTCATCGCTCATTGTCCGCGTTTATTCTTCCCTCTA  
GTCGCGCCCTACAGAGTCGCTTCCTCCCCCGCCAGTTAACGAAAATTCGGCCTAAAA  
CTCAGCCAGTCCCCCGGTGCCTTTCGACTGGCAAGCAACCGAAGTACGAGCGTAGAA  
TCGGGACGCTCGATATATATATCTAAATAGAAAGAGAGAGAGAAAGAAAGAGAGAGGAAA  
TAAAGAGACAAGGAGAAGAATATAGATAGAGAAGATAAAAGTCTCGAAGAAGAAAGG  
AAGGAAGGAAGGAAAGAACGGTTCGAAGCGAAGGAAAAGTATTACTTCGAAAGCCAG  
GCCGGTTAAACCGGTGGAAGGCATACATATATGATGGCGGTGTGCATGTTTTGGCTT  
CTCACGTACGTGGGACAAGGGCTGGACCTGGCCGTGGGCAATCGTCCGGTGATCATAA  
TGCAGGGTGCAGCAGGAGCAGCAGGACTACCGGCAGCACGGCAGCGGCATCAGAAAG  
AAGAGCGAGTTGAATTCGGTAGGCAATAACCTGTTGCACTTCAGAATATATCCTCCCGA  
GGCCTCTCACAGGGACGACCTGTCCAATTGGCTCCTGTTGAACGACGAGCCGCGGATC  
TCCTCGTGGACACCGGCCCGGCATATTGATCGACGATATGATCAGGGAGCCTAGGGAGCT  
CCAGACCGTATTTTTCGCCCTGTCCCCAGCTATGCTGAACACGCTGTACACGGAGTACG  
TGAACACCGCCTCCTCGCAACCGGCCGACCACTTTCTCCACGAGGATCAGCAACAAG  
CCGTTGGCCAAGGTCCGTTGGTTGGCCAACGCGGCAAGAAGCTTCGTATCGAATGTAG  
ACACTCGAGGAACACGGTCAGCCTGCCTATAAGGGTGTGCGACGACGAGAAGACGAC  
GGGGCGGAACGGAAGGCTCCAGGAAGCCAGACAATCGAACTACGACGATCTCTTCGA  
GCAGAAATTGAACACTGCTGCTAATATGAAGACTGACCCGACGTCACGGGGATCCGAG  
AAGCTTCAACGGGATTATCAGAATAACGGCGCAACGTTTGTCCCGAGGCCACCGTTGT  
TCGGCCTGGACGCGGGCAAACCTCCCGGAAAGAGGAGCCAAACTCCTGTTGGACGCC  
GCTCGATCGACCTCTCAGGAGAGTCGGCCCCGCATCAAGCTCAACCGCCGTCTCTCCT  
CGGGAACGGTATCAGCGTCGCTTCTCAACTTATGCTCAGATCCACCAGGGGAAGCATA  
CAGTACGACGTACCGCAAATCGAATGTCCTATCTCAGAGGACGGGATGGAAAGGTTTG  
CGTGTCCCTCAGCGGACAGAATGGGTAGATACCATTGCATCGACGATCACGCCTTGTGC  
GACGGTTTCATAGACTGCCCTACAGGCGAAGACGAGGACAGGCAAGCCTGCATGTTTT  
ACAAAACCT

>novel\_circ\_001123

GTCCATTAAATGATGAAGAAATTTTAACTATGTTTACTGAAAATAAGGAACCTACAGTA  
AAAGAACTAACAGATGATACTTTTGAACATTTAACTCAAGCAAGTAGTGGAGCTACAA  
CTGGAGATTGGTTTGTTATGTTGTAGGTTTTAATTCTTCCTAATACTTTATATACTCTATTT  
TAAAGATATTTAATATATACATATAGATATATATATATATATATTTTTTTTTTTTAAATAAGT  
TATAGTACAGATTGTGTGGAATGTGTTAGAATGATTGCAAGATGGGAAGCTGTAGGTGC  
AAAATTAAAGCAAAGGGTTAATGTAGCACGTATTGATAAATATACAACCTGGAGCATCTA  
CAGCAAGAAGATTTAATGTTTATAAAGCTCCTGAATTTATATTGTAAGTATACAGTTTAA  
AAAATAACAATAATAATAATGTAAAAATCTACAATAATAAAAAGGATTAATAATATAAT  
GATGTTATAATTTTAACATAATTTATTTTGTACTTGTAGATTTAGACATGGAAAAATGTA  
TCGTTATCAGATTACAAAATATGATATTAACCTCTTTTGTATCATTTGCAAAAAGAATGGTAT  
AAAAACGCACGTGCGGAATCTGTTCTGTACCACAAAGCCCATTGTAAGTTTGAACAC  
ATTTATTAATAGATTCAGCCTTTTATTATAATTATTATTAATTATTAAGCAGATATTATAATT  
ATTAAATTCTGATTAAAAATTTCTATTTTGTAGCGATGATCTCGTACAAATGATCGCAAATT  
GCCTTCGTGAAAATCCGTGGATAATGAACTCGGTAGTATAACAATTGGTGTATTTATTA  
TCATTTCTGTAGCTTCTAAATTTAGACGTAAAACTGAAATTCCACAAAAGAAGGACTAA

TTGTTTCATTTACCAAAGATATATATTATGGGTACTTTGTCAACTATTAGTATTTATAATTT  
TATATAAAGCACAATACATATATACATACATACATACATATATATATATATATATATATA  
TATATGTATGTATATAAATTTTTTACTTAAAGACAACTTTTATTTTTTATATTTAACAAATT  
ACATAATCTTTTATTTTTCTAATTTTATTATATTTGATTAGTGCCCATATATAGATAGAAG  
ATAAAAATACGTCTATATTTCTAATAATTGCATTTTTTATTTTCATATAAAACATATGTAATA  
GTCATTGCAAATCTATCATTTTTTAAACAAATGTTTTACAATAAAATACTTTTAAATGAAAA  
TTATTGCTATTAAATACATGATAAAATATCTATTATATCATGGTATTTTTCTTCCCAGAAAA  
AAAATCTGAATTAATATAACAAAATACCTTATATATTATACACAGATCTATTTAAAAATTA  
AATAAAATTGAAAGTAACATATTTATTTGGATAAACGTTGTACTTTAACTTATTTTTTTGT  
TAAATAAGATTGAATGTAAATTGTTTCACATTCATTAGGTAACAATACATTTCTTTATTA  
GTTTTTTATTATGAGTAAAAAAATAAAGTAAAAATATGATATCAAATGTATTAAAATTCCT  
TGTATCTTTCTGTAACCTAATAATTTCAGAATAATTGTTTTGTTTTATGTCTTAATATCATC  
ATAGTTCACAATAATGCTATTATTCGCTCACAGACACTGTTTTACATATTATAGAAGTA  
GTTTTGTGCAATAGTATATTTACTGTGATCACGATTTAGTTTTATTAATTAATAAATTTCCA  
TATATTTTAAACATTATCAACTGATATATTTATCCTAAAAATCATAGATGTGTCAGCTAGT  
GCCATTCTGATACTATTTTTCAAACTTTTCTTGATACATGAAAATTCCATCATATTGCTTG  
GTTTTGAGTCAATCCAAAATCCATCAAATTCATAGAAAAGATAACTATAAAATTGATGA  
AATGCACGAATTGTTGGAAAACCTTTTGAAGAATTATAAATATGAGTTTTAGCACTTCC  
ATCCCTTAGTAATTTAATGCCATACTTGTTAAATTTATGCCAACTATGGCAAATGCATAA  
CCATAACGTGGATGTGTAGAATGCGACAATACATGTGTTGCAGCACTGGGATATTCCTG  
AGCAAAATAAACTAAATTTTCTAATCCCAAAATCCCATTCCACGAAAATCAGTTTTTG  
GATCATCACCTTGAAAGCCAATGTGTTGCCATTGTTTAGTAACTCTAGCATCTAGAGGC  
TCATATGGCATTAAACAAATTCATAACTTTAATAGTAATAACTCATGATCTGGATTATCAG  
CATCATAAGGTGTTCTCCTAAGCTCTTCACATTCCACACAAAGTTGTCTATAGCCCCAA  
ATTAATTCTATACATTTACCAAATGATTTAGAAAAATCAGGATGAGCTGCTGGGTTTATT  
TTCTTAGTTACCAATACATTTTCAATAGCTTCCTTTACAATTTTTCGTTTTGCTTGTTTTG  
TAAATGCACATTGATCAGCAAGATCATTCAAGTAGATTAAAAGAGTTTTGATATTCGCAT  
TTTTAGATAATTTAAGAGATTTTTCTACAGCTAGTGTTCTTGGTGCTCCAGGAAGTTCTC  
CATAACAAATTCCTTTGAAGTTCGCACATTTGCGTTGTATGCCTTAATAACCATTTTATAA  
CTGGTCTGAAATACGAGCACACTAGTGACCAGAGGTATATAAACATGTTTTTTGATAAT  
AAAAAACCTTGATACGAAGGATATTTGCATAAATCCTTTTATATTTAAGTTTAAATTAAC  
CTCTTTCCGTCATTATGTTTCAAATATAAGTTTCTTTTATTAAATTTAAAAAATTTTGTC  
ACTAATTTAAAAAGATTCTAATACAAAAAATCAACACTTTTGTATTTTATATAATAATAAA  
TATATTTTCTCTTCTTCACTAGTATCATTAATCAATGCACATAACCTATACTAATATAAC  
TAACATTTATGACAGAAAGTCTGATTTTATTTAATTGAAAATAATTCATCTATTAAATTT  
ATTTATAATCAACAAATATTTGATTTCTATCGCAAAAAAATTATTGATTTTTTAAATACA  
TGACTTTAATAAAGAAAAATCAATAATAACCTATTAAACTAGCATAGTATCGATACCAAT  
GGTAGAAGAGGTCACCTACTACCGTCATCTTATATCAAAAATTTTATGTGTCTAAATAGC  
ATACATACCTATTTTTTGAATTTTAGATAATTTATGATTAGAAACAAACATTATAAATATA  
GATAAAAAAATGTACAAAAAGAAAGTGTAATAAATACTTCAACTTAAATATTTGTATCG  
TTCTTATAAAGCAATAGAAAGAATAGAAAATTATTTTCAATATTTTTATTTTTTACCTTAA  
ATATCTATCCTTACTAATATACAATGTTTGTAACACAAATGGAATTTATTTTTTATTGTA  
ACTTAAAAAGTATAATGAAGAAACAATATCATATCATAAAATGAAGTATGTACAGAGAA  
ATAACTTCAATCAATTAGATTTTTTAAATAATCATCCATCTTTGATTAAAAAGTTTGTCAAA

TCGGTAATCTCAAGAAAGAACAAAGAAATTATCATAATGGAAAACGAACATTTGTCATC  
GACAGAAATTTCAACAGATTGTTTCGAGCAATTTCGGACAGTATACAAAATGTTGATAATC  
AATGTAAAGAAATATTGGATGAAGAACAGGGTAAAAAAGACTTGGCAGAAGCTGATTT  
AACATTAGATCTTGGAAGTGTGTTACCAAATATGATCGCGTTTCTGAAAATGATGATT  
CGTTAGAGAACTTTTCGGCTGTTCTCGAACAGCCAGAAGATTTGGTGATTTTAGAAGG  
TACACAATTAGCAGAGGATGATCAAGATGATAAAGATTTAAAGTATGTAATACTCTAATA  
AATTATGTAATACTTCCTTTTTTAATCAAAAAAAGAACAATTATATGTTGTGTTGAATTG  
AATGAATATTGTATTGAATAATTTTCATAATTAATAGTTGTATTCTTCGAGAACGCATAGA  
GTCTCTTAGTGAAGTGATGCAAAATTTAAAACAAGAATTAAAAAAGGAAATAGAACTT  
TGGAAGAAGGAAAGAGAAGAATTGCAACTCTTACGTGAAAAAGACGATGAATTGGCT  
TTGGAAGAAGCAACTGCAGCTGCACGTGCAGCTGCAGCAGCTTATGCAGCTGAATCGC  
CATTATCTAACAATTTAGGTAATCTTTTTTAGAAGATAAAACAAAATATTTTAAAAATATT  
CAAAGAATCAATTAATTTATGATACAGGAGATCTTTTAGATATTACTTCTGAAGATACGT  
TTAGAGAATTGACAATACTTGAATATGAAAAAAGGTTAGCTAAATATCAAGATGAATATT  
CCTTTAGCCAAGCAGAGAAACGTTACAATGCTCGATGGAAAATGGTTGCAAACGCATA  
TAAACAAAAAATTGATGGAAGTAGAACGACTTTGTAACGAAGAATTGGAAAAGGTTAA  
AAAAAATGTGAATCATTTGCAACCACTTAAAGAAATGATATCTCAATGGTATACTGATG  
AAGAAAATCATGGTGATTCAATCAAAAGAAGTATTTTGTGCAAATACACAAAAAAT  
CAATACTTTTAATGAAAATAATACGCGTAATAGTCACATATTTCAAAGATCGATGCAGA  
AGTCAATATGGCGCCAGAAATATTCGTTGCTCGATTCAAATCCGATGATTTTACAAAAAT  
GGATAAATTTTATGGATAATTATATTTTTTTTCATATCTATTGAAATATTATTTTTCACTAT  
ATATTTAATATATATTTACTTATATTATGTATGTGTAACATTTTAGAATTGTAAAAAAATT  
AGCATAAATTTTAAATTTAAATTTTGGATAACATTTTAAAGGAATAAATTATTTACTA  
GAAAGTATACATACCTTTTCGTTGCTTTATGAAAAAAGATTTTATCCTTGAAGAAAAATCT  
TGACACAATAACACAGTTATATATAAATTATGTTCAATTCTATTTTTTCTTTAATTGAATAA  
AAAATATGAATATGAACCAGAAGATAGTTGTAAAATTTTTGAAAAATTATGCAAACAC  
AATGAAAAAATTTATAAACTTATAATTTTACAATAACTTTGAAGCAAATTAATTTCACT  
GAAATGAAATATAAGCACTAAAATTTAATAATATATTGTTTAATTTACAAAATAACCGTCC  
GGAGTACACTATTTGAAAGTATTTCCGCGCGTTCCTTTGTTCACTAACGAATATAGACTA  
TTCCATTAAATGACAGTATTACCACTCTTAATACGTTTTGTAAAGCAAACCTTCTGTCATAA  
TTATTTGAAATGAATTTCAAATTTTCTAATTATTATAACAAGTTTTTATAATAAATTAATAA  
ATAAGAATGAAGAATAATGTTTTTAAATATTATTGAATTTTGCTATTCTAATATCATTAA  
AAGAAATTATAAAATAATTAAAAGGTTAGAATTTAAAATGAATCGATATTTAAAAGAAAT  
GTTGTATTTAAAAGAAATGATTTTAAATAATTATTTATTGAATTTCCAGATTGAATAAAAT  
GTAGTATTCGTCAAAATTATTGCATTAAAAATAACAATTTTGTTAATTTTAAATAAACAA  
AATTGTTCATTTAAATCATATAAATACTTCTATTAATATAAAAAATATAAAGAATTGGCA  
AAAAAAAATACATTAAATTTATCTTTTATGTTGTTAAATATTGTAAACAAATTAATAAT  
GTTTAAACGAATAGAAAGTAATAGTGAAAATGAATTTTCTCTACCTGCAAAACGTCCAA  
AGTATGATATAAAGAAAGGAATTTGTCAGATACTTCTATAAACAATAAAGATTCAAGA  
AATAAAAAATATGGAAGAGATGATGTTTGGGGAGATGATTTTGCAGAAGAGGATATTGA  
AGAAATGGATTTTATAGCTACTCAAGCTTGTTTGCAGGTTTTATATATATATCTTTATTT  
TTCTTTATTTATTTATATATCTTTTTATGGTTTTTTAATATATAAATTTATTTGTTTTATATAT  
ATTATTTTATATTATATATATTAATTTATATATTTTATATATAAATTTATTTTTCAGGATGATA  
ATATTGTAAGTCAATTAGATATAGATAAAAAAACATTTATAGAAAATGCAATACCATCTA

CTAGTAAAATTAATTTAAATAATAATGATCATAAAATATCAAAAACCTTCTGCACATGTATT  
AAGTAAACAAAGAAGAAAAGAAGAAAACATAAAAGATATAAGTACTGTAGTTTCTGTT  
GATTATAATGAGTTTGAAGATAAATTAATAAATAAAAAAATATATAATTCAACATTTAAAT  
TAGATGACAATGCTACTGCGGGTAAGTAGGAATTTCTTAAGAAATCATAATTTTTATTAT  
AGTTTTGCATATTATTGAAAATAATATCATAATTAGAATATGCAAAGGAATTAGAGAAGT  
TAAAATATGAAAATCAGAAGTTATTAAATGACTTCATAACTAAAGAAGGAGAAGCTGTA  
TTTTTACGAAACCAATTGCAACAAACTCAGTTAAGAGCAGAAAATGATAGATTGGAAA  
AAACACGTTTTATTGAAGAACAAGAAAATCAACATAGATCGGAAATTAATATTATTTGT  
AAAGAAAAAGAAAATTTAAAAACACAACCTTGAATTGCAAGTTAGTAATTTATTGATAAT  
TAATTTTTTTATAATTCTATTTCAAATAATATATTCTGATTTTTTTCTTTTATTATAGACATT  
TGAAATAGGAAATTTAATAGAACGTTGTAAATTATTAGAAAAGTGGAATATTAAATTAAC  
AGAACCACATACTATAAATTTAAATCTTTCTATGAATAAAAATAAATTTAGTTCACCAAA  
GAATCGGTAAATAAATCTTTAAATATTAAAAATATATAATAATAAATATTTTTTTTAAAGAT  
AAATATTAAGAAAATATTTAATAATTATTTTCAGATCATCAGTTTCAATCATGAAACCAAT  
AAAAGTTACAGACACTTATGTACAACTAGTAAAATGATTAATAAAAGTAATCATTTTCT  
CAAAATATGGAATCCATGTAAGAAGATTATAATTTAATATGAAAAATATTAATTTTTATCA  
TTTATATAATTCATAAGAATGAATTTAATAAGAACATGTTGTAGATTTTCCTCTTGCAAAA  
ATTCCAAAATCAATATACGATCCACCACAACCAGAGAAATCTATAGTTGATATTCAGATT  
ATAGAAAAAATAGGAAGACGAAATTTGCCAATTTTACAAGAAGAAGATACATCAAGAA  
TATTCGGTAATATTTCTATTTAAATTATATTTTATTCAGAGCTTAACTACTTTGTACATTTTA  
TAGAAAATCCAGAATTAGTAAAACCAATAACGACTATGATTGATGATAAAAAATTATCA  
GTGGAATTTATTGTGCCAGAAATAGTTGCTCTTCAACGAAAAACCAGCTTAGAACTTG  
AGGCAGAAGAACTATACCATTAATAAATAAAGTAAATTTTTTCATATATATTATTAAGT  
TTATTTTTATATATATTAACCTTATTTTATTAAACAATATACAAATTTATTAATAATTATATTT  
TTAGTTAATTTCTACTGCAAGAGAATTAATTTTAAATGTAATAATTATTCTACAAACGATT  
TCCCAAGCTATGAAAAATGACGATATTCGAGACATGAATGACATTTATTTTTCTTCTTTAT  
ATTCGAGTTCTGACTTCAATGGAATGCGTGTGTTCTGCTAATGCATGGCACGAATGT  
GAACGTGGTGTGAAATTAGAAGAGTATTTGGCGTATTATCGTATGTAAGTGTGGAATC  
AAGTTATCTTAGCAAATATATTGCAGGAAAAACACGTTTACTCATAGAGAGAGATGAGT  
CTTATAAACATTATTCCTATCAAATGGTTCGTTACAATACTTGTTGAAAGAGAATCAAG  
ATTTTGAAATACTTAAAATGATATTGCAGTTCGTTGTTTTAGTTGGGACTACGGTAATAT  
ACATTACTTAATGATACATATTTTGATAATTTAAAAGAATATTATTAATATTAAAGTTTTAT  
TATTTATTTTTAGAGAAGGTCTCATCAATTTAGTGGTGTATATGTGCAATTATGATGATT  
ATTTACAATGTTTCATGAAAAAGTTCAATATTGTTCTGAAGGGTATGCAACTGATATATATA  
TATTTAATAAATTAATATATTTTAAATTAAGTTCAAATTTTTTTAACTTAAAATTTTTTATT  
CCAGAATGGAATATATTTATCAAATATTTAAAGAAATAATTTTAGTAGACCTTTGCCATA  
TTGTTATACATTACTTAATAATTTGATGATGATTTTTGTGAAGTCTACAACCTCATTTAAAA  
AAACTTTGTATTAATTCACGTATGTAATTTAGTAATATTAATGAACATTTATGATTTATATA  
AAAAATATACATTTTGTTAGTTTTATGTATATTAACATTTTAAATGATAAGTCTAATAAAT  
TTTTTTCATATTTTATAAATAATTACTTTATTATTTTTATTATAGAATCAATGGCAGTGAATA  
ATTGAAAGGTTTCATTACATTTTACTCCAGGTAAAATAATATTTTTTTTTAAATAAATCGTA  
ATTCAATTTTAAAATTATTATCATATCATATCTATTTTAGATGCTTGTCCATTACAAATTC  
TTTTAGCACAGGAGGAGAATTATCACTTTGATATATTATCTGCAATTGACATTACGGATAT  
ATTATTACAAATTGTACAATATATATTACATACAGATACTATTCCTTTAAGATCTGAACTT

TGAATTCTTGTAATTGTTGTATGAAATTGTTAAGATTCACTATTAAAACGTTGTGTAAAT  
GTTCTGAAGCAAATCTAGCTGCCATTGGAAATTTTAATCCAGATAATTTCCCTGTACAA  
AGGAAAAGTTCTTGTAACCTAAAGAACATTTGTACGAAACACTCGCTGTTTAACACAG  
AAATAAATAAAATGTGTATAGGTGAAATATACCAGGATAAGTTTTTCAGACGAAAATGCT  
TGGTCAATTATGAAAAAGAAACAATCAAAAGTATTAAGAGACGGAATAAGATTTTTGT  
CGCATTTGGCAATATGTGACCCCGATTTTGTAAATTCGATTGACGGATATCGAAGATTCT  
TTCATTTATTTATGAGGAATTTAAATACTTTTGAAAATTTTATTCTTCATGAAAATGAACG  
TAAGTATAAATATATTTTTCGTTAGAAAAAATGTAATAAACTAAATTTTAAACTTCCTC  
TTTATTGATATCATTTTTCTATCTTTTTTTATTCTTACCACATGATACGAGTTATTTAATTT  
TATCCCTATTTATCGGTCCACGAGAATTTTATATTTCCGCTTTGTTGCTTACTCATTTGCT  
CTTGGTCATCAGTAAATTTCAATTCCTTTTAATATTTTGTAAATTAATTTTTTCGTAGA  
ATTTTTTATATATTTTTTCATTTGATTTTATTTTCAGAAAATGAAATATTAATTTATTAATTA  
TAATTTTTTTTTTATAGAAGAGGCTATGAATCGAATAAAGCAAACCTTTTATTTTTGATAA  
AACGCAACAATCTGAAACAGAACAATTTGTAACAAAGAATTCCACTAAGCAGTTGGAT  
TTATTATCAAATTTTGAAAAAATAGTTGTTCAACCAATATCCGAAAGACCTAAAAAGAA  
TGAAAATTATAATAAACTTTACTTGCATTCAAATCATTGTTTAATACTAAAATGGATTTTC  
TCGTAATTTAAAAATTTAATCATAAATTATATTTAATCATAAAAAATTTAATCATATATTA  
TAATAATAAGATCAATATCGAAGACTGAATTTATTTGAATTTGAGTACAATTAATTATTAT  
TTCATGTATATATTATTTTGTGAATTATCTTCAACTTTGTTCAAAATATCGTTCTATAATAA  
AAATGTAATATCTCGCAATATTTTATTATGGACGATTCTTTAATTCAAATTAATTGAGCTC  
GACATGTATTTTTAAATAATTTTTATCTCCAAATCATTGATTTATTATAATGTAAATAAAT  
TATTTTATCAAGAACTATTATTGAGAAATATTTTACAGTGTTAATAAAATATTTTATATTT  
TAATTATATAATGTATTTAATAATTTAATATCTAACACACATATAATTCCTATTTACATCC  
CAACCAATCTTTCTTCTTTCTAACATCAAAAATTAGAAGAAATTGTTTATAACTATGAC  
AAAATTTTAACTTGAGAACTATAATAATTAAAATTAAAATTAAATAAAAAAATTTGTA  
TGCGTTTACAAACATTAATAACGTCAATTTATTATAATCATAAAGAAACATAAATCCAAA  
TACAAAGATATTTAAATTAAGAACTTTCAAATAAGGATCTTACCTATTATTCTTTTGAA  
AAAAATGTCATCTATATATCACATCTCCACTGGACTTTATCGATCAAGCTTCTAAAGATG  
CCACAAAAAATAAGTGTCGCTAATGAAAAGATAAAAAAATATATATATATATATATATA  
TATATACATATAAAACACTTTTTGACGGGGTTGAAGGCATGTCTGTGGCGTTGGTTTG  
GAAAAAAGGAAAAATCCTGGCGCCAAGGCGTGATCTAATCAGAGACGGTCAGTGTTT  
CTCTCTCCTGGAATTCATTTATCTGTGGCGCAAATGCAATTTGTAGGAATTCTCCTCAAG  
GCCTGGCAATGTTCCGGTGTGATAACGCCAGCCGAAATTGATAGTACACTATCACGAT  
AGCATGTGACGGAAGTGATTTTCCCGCCTTCCGTTCCGAGCGTAATAATCCCAAAGC  
GCGGCATCCCTGTTTCATTCATAGATGTAGAACGATTTCGAGAACCGATTTTCGTTTTTAT  
CCCTCGTCCAGTGATCGTCTTTTCATTCTTATCCTTTACCTCGGCCGTTGTTACGT  
GATTCGCGATTTGCCGTTTCATCCTTCTGATGATGGATTTTGAGGACATGTGCATAAAAA  
TTCAATCATCGATTTAAAAGCGAAATTGCGAAATCGAAAGGGAAGACGCTGTTCTTTTT  
TTTTTTTTTTTTGAATTCGATTTATGAGTTACGGTGAATTGTTTCCTTGAGGAATAAAAA  
AAAGAATGAGGATCTCTTCAACAACGCTGTTTCTTCTGTTGGCCTTCTTGATTCAGTGT  
TCCATTTGCTATGGTGCTGCGACAACCTGCGAATAGATGTTTCGTCCATAAAGCTGGTGAA  
TGGAAGAGTTTCGATTGAGGGTCAGGGGAAGGATCATCAAATTAGTTGTTACGACGGT  
TTCATCTTGTGGGTACCAAGTATGCAACTTGTTTTCGAGGCCAATGGGATACACCTAC  
GCCCATATGCGTCAATGCAGAATGTCCTGTACCACAAACACCAGAGCATGCTCTTATAG

TGCCTAAATATAATGGAGCAATATTATTATATTTTTGCGAGCCTGGATACACGTTGTTTGG  
TTCACACGAAATCTATTGCAATGGAAAGCAATGGAATGGCACAGTGCCTTATTGTCGAG  
ACACAAATGCGGCACCCCCGACGCAATGCGATTTCGAGAAACCGGATCTTTGTTGGTG  
GGAGCAAGATCCACAGCACGATTTCGATTGGCGGCGACACAACCTTCGAGACACCAAG  
CTCCCATATAGGAACTGGTCCAACCTCATGATCACACATTGGGACCAGGAAATGAGGGTT  
ATTACTTGTACATCGAAGCATCTGGTCGGCTGCAAAATGACTCTGCAAGAATTATTTCT  
CCTATTTATAACGCATCGTACACTGACTCTGGCTGTTTCTCATTCTGGTATCACATGTATG  
GAGCAACGATAGGCGCTCTAAACATATACTTCAAACAGGAGAACCTCTTACCTCGTTTG  
ATGTTACCAAGGAGGGTGACCAAGGAAACCAATGGCTGCACGGTATTTTCAATCTTC  
CCAAGGCTAAGAAAGGTTTTTCAGATTATAATCGAAGGAGTACGAGGCAGCAGCTATGT  
GAGCGACATCGCTGTGGACGACATAGCCATTTTACAGGGAAACAAATGTCGTATCGAG  
AATAAAAACGAAACTGTGACGGTTACCGAGAGCGACGATGATCAAATCGAACTGGTG  
AACGCGCAGCAAACCTTGCCGTGGAAGATGTAAAAATAGTGTGACATACAATTTTACAA  
CTTCGATGCCACCCACGCCGGAAGTCTGTCTCTGTACCCTCGATTGCGAAGAACAGTC  
AATGTGCTGCCCCGATTACGCTGAGTATTGTGTTCTAGCCGAGACCGAAGAGATGATCA  
CGGGAACGGAGCAGATCCCGACTACGAATCACGAAGGGGGGGTAGTTTTTCGTCCAC  
CCGCGAGAAAGATCACGGTGACCGACGTGGCGACGGTGAGGACAGGTTTCTCGATAA  
ATCCAAAGGACGATATCGATCCTGTCACGTTGAGGCCGTCCACCAGCACCACGTTGAA  
ATCATCGTCCGTCACGCGGAAAGTGGAGAAACCGATGAGAATTACCAAACCACCAACC  
ACTTACCACCAAAAACACGACAACAACAACGACAACAACAACGACGACGACGAC  
GACGACGACGAGGGCAAGAACAACGAGAAGAACAACAACCGTCCCAACAACGACGA  
AAATTGCACAGACAAAGGAGACGCCGTTTCGTTTCGACCCACCACCACCACCACCAA  
CCACCACCACCGGAAGATACGGTTTCGGTGAACGAGAAACCTGATTTCAGATATGAGGAG  
GCAAGATCCCGAGATACATCGGGCATCGAAATTCAGTTTGCCGGGGATAATCGGTGTG  
GTGGTTGGAATTTTAACGGGAATGGTGATCTCATTGTTGGTCGCCACCATAATCGTTAG  
ACGAAGAAAAACGTACAAACGTGGAACCTAATGGATCGGCACTCTCGGAGGATAGCGA  
CGTTCGATTCTAACGTCAGACGAGATTTTGGATTTACGTTAGCCAGACCCAGTGACG  
AGAC

>novel\_circ\_001124

GGATGGACGAGCGATTTCGACGATCGAGAGATTACACGGAAGGAGCGTTAATCCTTTAC  
CGGTCACGCATATGAGCAAGTTCTTTGACGATCGACCAGAGTCAGGTGTCGCCACGGG  
TATGCAACTGGCGAAGAGCTATTCGAGAAATCCTTACAACGAGGAAGTTCAAGTGATC  
GAATTGACCGGGGGCGTGGAATTGGTGCCGCTTTTAACCAGCAGGCGTTACTGCTCGC  
GATCGAAGGCCGCTCGTCACATTGCCACCGACGCCACTCGACCTGGATACACAATAGA  
CTC

>novel\_circ\_001125

GAGCGCCGCGTTGGATCAGGAGATGAAGAACGTGTTGACGTTCTGGATGAACAGGGG  
GGTGGACGGTTTCCGGATCGACGCCATCAACCACATGTTTCGAGGACGCGAGGCTGTTG  
GACGAGCCGAGCGCCAACAGGACCGACCTGTCCAAGGACGATTACGAAAGCTTGGTC  
CACTTGTACACGAGGGATCAAAGCGAGAC

>novel\_circ\_001126

GTGGACGTGATCGATGGAAGGGTTCTGAGCGTGAAACGGGAATTGGGTAACGACACG  
GTGATAGTTATGATGAATTTCTCCAAAAATCCCGTCACTGTCAACCTCACCAAGCTGCA  
TCCACCTGCCGATCTCGTCGTTTACGCTTGCAACGTTGTCTGGCTCCGGTCTCAGCCACG  
GCAACTGGATCTATCCGGCCTCGATGACTATCCCCGGATCTAACTCAGCCGTATTACC  
AATTACAAATTGTATTGGCGATATTGGCAAG

>novel\_circ\_001127

GTGGACGTGATCGATGGAAGGGTTCTGAGCGTGAAACGGGAATTGGGTAACGACACG  
GTGATAGTTATGATGAATTTCTCCAAAAATCCCGTCACTGTCAACCTCACCAAGCTGCA  
TCCACCTGCCGATCTCGTCGTTTACGCTTGCAACGTTGTCTGGCTCCGGTCTCAGCCACG  
GCAACTGGATCTATCCGGCCTCGATGACTATCCCCGGATCTAACTCAGCCGTATTACC  
AATTACAAATTGTATTGGCGATATTGGCAAGGTGTAGACTG

>novel\_circ\_001128

GGAAATTGAAGGTATAAGGTTATCACGAGGGCACGCCCACGAGGAAGAATCGATATATA  
TTAACGAAGTCTACGAAGTTTCGAATGGACGAGGAATTGGAAATGAGGAATGAAGTG  
AAATATTTTACACGGATCAATTTCTTAAATGCTCGAACGAATATTTACGAGTGAATCGTT  
TCATTCTTTCTTTATAAATAACAATAAGTATTTTATATGATATATTAAAAAATAGAAAGAA  
AATGGAAGAACGATGTAAATGGTTTCATCGTTCTTTGAATGACATTATTTGGAACACTTT  
ATTAAAAGAAATGAAAGGACGAAGAAAGGAAAGGTTAATAATGTAAAAAAATTCCTAT  
TGAAATATACATCTTCGATGATAACCTGAAAGATAATCAGAAAAATTTGAATCGTACGA  
GGTGAAAAAAGAGGAAGAAAAAGAAGAAACGATTTCGATTTGTGCAAATATCTTTTCC  
GATATTCATTTCTATGGATCGATCTGTAAAATCTCAAATGCAAAGTGGATGTAATCGAAA  
GAGAAGGGCGCGAAGAAAAACGAAAAAAGGAAGTTTGTTAATTTCTTTTCCAACCTG  
CCGATTCGTCTGAACAACAGGGATGATCAGCGAACCAAGGTTGATAAAGATTTAAAGCG  
CGTGCCCTCGATTTTTTTTCCAGTCCCACGACGGTAATTGCCATCCTGCCTGTAGATCGAG  
TGGCTACAGCGTGATTTACAGCGCTCTTGGGACACTAAGATGTGGTGTCTCCTCCTCTT  
CGTGCTTCTTACCCTCAACGGATCATCCTCTCCTCTTCCAAG

>novel\_circ\_001129

ATGGGGCCGCGGCCAGCCGGATGATATCAGTGCGATCAATCTAGGAGATGAGAAATTC  
GACCCTGACTCGGATAAAAAGCCGCGCGCAGGACAAATTCTATGGATCCGTGGTCTAA  
CACGACTACAGACACAGACGAGCAAAAGAACTCTGGTGCAGAATGTATCTGTGACAG  
GCAGATCCCCCTCTCAGGATTACTATATG

>novel\_circ\_001130

ACGAAGAAATAACTGGGAACAGCCATGTGAGCGCAGCCAAGCCCGAACCTGCGGAGA  
ACCATCATGCAGTTAGCCACGCACCTGAAGGAAAGAAGGAGAAGAGTGTTTTACAAG  
CCAAGCTAACTAACTCGCCATACAAATCGGTTACGCCGGCTCGACCATAGCAGTGCTT  
ACCGTTATCATTCTAGTCATTCAAGTTCTGCGTTACCACATTTTACGTGCAGGGGAAAAG  
TTGGAAAAATACGTACGCTGGTGATCTGGTGCGGCATTTGATCATTGGTGTAAACGGTAC  
TTGTAGTTGCCGTTCCCGAAGGTCTTCCTCTAGCTGTTACCCTCTCCCTCGCTTATTCCG  
TTAAGAAAATGATGAAAGACAACAACTTGGTGCCTCATTGATGCTTGTGAAACGAT  
GGGTAACGCGACGGCAATCTGTTTCGGACAAGACTGGTACCCTGACAACCAATCGAATG

ACCGTTGTTCAATCGTACATATGCGAAAAGATGAGTAAAATAACCCCGCAGTTTTTCGGA  
TATCCCGTCGCATGTCGGAACTTAATGGTTCAAGCTATTTCTATTAATTCGGCGTACAC  
ATCCAGAATAATGCCTGCGCAGGAACCTACAGATTTGCCGCTTCAAGTCGGCAATAAA  
ACCGAATGTGCCTTACTTGGATTTGTAATAGCCCTGGGCATGAACTATCAGACGATACG  
AGACGATCAACCTGAGGAACTTTACGCGGGTGTACACGTTCAATAGCGTTAGGAAG  
AGCATGTCCACCGCCATCCCGAGGAAAGGTGGTGGATACAGGCTCTTTACCAAGGGCG  
CTTCCGAGATCATCATGAAGAAATGTGCCTTTATATATGGTCGTGAAGGTCATTTGGAA  
AAATTTACCAAAGAGATGCAAGAGCGTCTGGTAAAGAACGTGATCGAGCCGATGGCGT  
GTGACGGTCTCCGTACTATCTGCATCGCGTATCGCGATTTTCGTTCTTGAAAGGCAGAG  
ATTAATCAGGTTTCATATCGACAACGAGCCGAATTGGGATGACGAGGAAAATGTCGTGA  
ACAATCTCACGTGTTTGTGCATCGTGGGTATCGAGGATCCGGTACGGCCCCGAGGTGCC  
GGAAGCTATCAGGAAGTGTCAAAAAGCAGGCATCACTGTGCGAATGGTGACTGGAGA  
CAATATAAATACTGCGCGTTCCATTGCATTGAAATGTGGAATTTTGAAACCGAACGAAG  
ATTTCTGATCCTCGAAGGGAAAGAGTTCAACAGGAGGATTCGCGATAGCAGTGGCGA  
GGTACAGCAACATTTGTTGGACAAAGTGTGGCCGAGGTTAAGGGTGTGGCTAGATCG  
TCACCTACAGACAAGTATACACTCGTGAAAGGCATAATCGATAGTAAAGCGAGCGTGA  
GTCGCGAAGTTGTTGCTGTAACCGGTGATGGAACGAACGACGGCCCTGCTTTGAAAA  
AGGCTGATGTCGGTTTTGCCATGGGTATAGCTGGCACCGACGTCGCCAAGGAAGCTTC  
CGATATCATCTTGACGGATGATAATTTTTTCGTCGATCGTGAAGGCAGTTATGTGGGGTAG  
AAACGTCTACGATAGTATAGCAAAGTTCTTGCAGTTTCAATTGACCGTCAATATCGTCG  
CTGTTATAGTTGCTTTTATCGGGGCATGTGCCGTGCAAGATTCCCCTCTTAAAGCGGTG  
CAGATGTTGTGGGTGAACTTAATCATGGACACATTAGCATCTCTTGCATTGGCCACCGA  
AATGCCTACGCCTGATCTTCTTCTTCGTAAACCCTATGGTCGCACGAAACCGCTCATTC  
CAGGACAATGATGAAGAACATTCTTGGCCAAGCTATCTATCAGTTGACTGTAATTTTTAT  
GCTTCTTTTCGTTGGTGATAAGATGCTCGACATCGAAACAGGCCGAGGAGTTGCGCAG  
GCTGGTGGCGGTCCAACGCAACACTTTACTATTATCTTTAATACATTTCGTCATGATGACA  
CTTTTCAACGAATTTAACGCTAGAAAAATCCATGGTCAGCGTAATGTCTTCCAAGGAAT  
ATTCACCAATCCCATCTTTTACACTATCTGGATCGTGACATGTCTATCGCAGGTAGTTATC  
ATACAATATGGTAAAATGGCGTTCAGCACGAAAGCTCTCACATTAGAACAATGGATGTG  
GTGCCTATTCTTCGGAGTCGGTACTCTATTGTGGGGCCAAGTAATTACAACTATTCCTAC  
GCGCAAGATTTCCTAAAATCCTTTTCATGGGGCCGCGGCCAGCCGGATGATATCAGTGCGA  
TCAATCTAGGAGATGAGAAATTCGACCCTGACTCGGATAAAAAGCCGCGCGCAGGACA  
AATCTATGGATCCGTGGTCTAACACGACTACAGACACAG

>novel\_circ\_001132

ACGAAGAAATAACTGGGAACAGCCATGTGAGCGCAGCCAAGCCCGAACCTGCGGAGA  
ACCATCATGCAGTTAGCCACGCACCTGAAGGAAAGAAGGAGAAGAGTGTTTTACAAG  
CCAAGCTAACTAACTCGCCATACAAATCGGTTACGCCGGCTCGACCATAGCAGTGCTT  
ACCGTTATCATTCTAGTCATTTCAGTTCTGCGTTACCACATTTTACGTGCAGGGGAAAAG  
TTGGA AAAATACGTACGCTGGTGATCTGGTGCGGCATTTCGATCATTGGTGTAACGGTAC  
TTGTAGTTGCCGTTCCCGAAGGTCTTCCTCTAGCTGTTACCCTCTCCCTCGCTTATTCCG  
TTAAGAAAATGATGAAAGACAACAACCTGGTGCGTCATTGGATGCTTGTGAAACGAT  
GGGTAACGCGACGGCAATCTGTTTCGGACAAGACTGGTACCCTGACAACCAATCGAATG  
ACCGTTGTTCAATCGTACATATGCGAAAAGATGAGTAAAATAACCCCGCAGTTTTTCGGA



TATCCCGTCGCATGTCGGAACTTAATGGTTCAAGCTATTTCTATTAATTCGGCGTACAC  
ATCCAGAATAATGCCTGCGCAGGAACCTACAGATTTGCCGCTTCAAGTCGGCAATAAA  
ACCGAATGTGCCTTACTTGGATTTGTAATAGCCCTGGGCATGAACTATCAGACGATACG  
AGACGATCAACCTGAGGAACTTTACGCGGGTGTACACGTTCAATAGCGTTAGGAAG  
AGCATGTCCACCGCCATCCCGAGGAAAGGTGGTGGATACAGGCTCTTTACCAAGGGCG  
CTTCCGAGATCATCATGAAGAAATGTGCCTTTATATATGGTCGTGAAGGTCATTTGGAA  
AAATTTACCAAAGAGATGCAAGAGCGTCTGGTAAAGAACGTGATCGAGCCGATGGCGT  
GTGACGGTCTCCGTACTATCTGCATCGCGTATCGCGATTTTCGTTCTTGAAAGGCAGAG  
ATTAATCAGGTTTCATATCGACAACGAGCCGAATTGGGATGACGAGGAAAATGTCGTGA  
ACAATCTCACGTGTTTGTGCATCGTGGGTATCGAGGATCCGGTACGGCCCCGAGGTGCC  
GGAAGCTATCAGGAAGTGTCAAAAAGCAGGCATCACTGTGCGAATGGTGACTGGAGA  
CAATATAAATACTGCGCGTTCCATTGCATTGAAATGTGGAATTTTGAAACCGAACGAAG  
ATTTCTGATCCTCGAAGGGAAAGAGTTCAACAGGAGGATTCGCGATAGCAGTGCGCA  
GGTACAGCAACATTTGTTGGACAAAGTGTGGCCGAGGTTAAGGGTGTGGCTAGATCG  
TCACCTACAGACAAGTATACACTCGTGAAAGGCATAATCGATAGTAAAGCGAGCGTGA  
GTCGCGAAGTTGTTGCTGTAACCGGTGATGGAACGAACGACGGCCCTGCTTTGAAAA  
AGGCTGATGTCGGTTTTGCCATGGGTATAGCTGGCACCGACGTCGCCAAGGAAGCTTC  
CGATATCATCTTGACGGATGATAATTTTCGTCGATCGTGAAGGCAGTTATGTGGGGTAG  
AAACGTCTACGATAGTATAGCAAAGTTCTTGCAGTTTCAATTGACCGTCAATATCGTCG  
CTGTTATAGTTGCTTTTATCGGGGCATGTGCCGTGCAAGATTTCCCTCTTAAAGCGGTG  
CAGATGTTGTGGGTGAACTTAATCATGGACACATTAGCATCTCTTGCATTGGCCACCGA  
AATGCCTACGCCTGATCTTCTTCTCGTAAACCTATGGTCGCACGAAACCGCTCATTTC  
CAGGACAATGATGAAGAACATTCTTGCCCAAGCTATCTATCAGTTGACTGTAATTTTAT  
GCTTCTTTTCGTTGGTGATAAGATGCTCGACATCGAAACAGGCCGAGGAGTTGCGCAG  
GCTGGTGGCGGTCCAACGCAACACTTTACTATTATCTTTAATACATTTCGTCATGATGACA  
CTTTTCAACGAATTTAACGCTAGAAAAATCCATGGTCAGCGTAATGTCTTCCAAGGAAT  
ATTCACCAATCCCATCTTTTACACTATCTGGATCGTGACATGTCTATCGCAGGTAGTTATC  
ATACAATATGGTAAAATGGCGTTCAGCACGAAAGCTCTCACATTAGAACAATGGATGTG  
GTGCCTATTCTTCGGAGTCGGTACTCTATTGTGGGGCCAAGTAATTACAACCTATTCCTAC  
GCGCAAGATTCTTAAATCCTTTC

>novel\_circ\_001133

CTATTGGTCCTCCAATTTCTGAGGCCAGTGGTGTGTCAGTGACACCAAAAAATAATACG  
AGTTGCTAGCGTGAAGAAGTATAGTAAAGTTGGCTTAAGCCAACATCGGTGGAAAAAA  
CAAAATGGCAACAATAGATGGCAGACCGACCCAATATGGTATCAGTCTTAAGCAACTTC  
GTGAGCTCATGGAGCTCCGAGGACGTGAAGGTGTCACTAAAGTCAATAGCTATGGTGG  
TGTGCAGGAGATTTGTAAAAAATTATACACTTCACCTAGTGAAGGTCTCAGTGATCAG  
CAGCTGATATTCAACATAGACGAGATACATTTGGTTCCAACCTAATACCTCCAAAACCA  
CCAAAACATTTCTACAATTAGTGTGGGAAGCTCTTCAAGATGTTACATTAATTATCTTG  
GAAGTAGCAGCATTGGTTTCATTAGGTCTTAGCTTTTATCATCCAGCAGATGATGAAGA  
AAAACCTTTAATAGATGAAGATGAAGCAAAATATGGTTGGATAGAAGGAGCTGCTATAT  
TTATTTCTGTGATCTTGGTGGTAATAGTAACAGCTTCCAATGATTACTCTAAGGAAAAAC  
AATTTAGGGGGCCTCCAAAGTCGTATAGAGGGGGGAACATAAATTTTCTGTCAATAGACAA  
GGAGAAGTCAAACAGATTTCTGTAGCTGACATTGTTGTTGGTGATATATGTCAGATAAA

ATATGGAGACCTGCTGCCAGCAGATGGTATCCTTATACAAAGCAACGATCTCAAAGTGG  
ATGAGTCCAGTTTAACCGGAGAGTCAGACCATGTTAAAAAAGGAGAATCGTTTCGATCC  
CATGGTACTCTCAGGTACACATGTGATGGAGGGTTCTGGAAAAATGTTAGTTACTGCAG  
TAGGCGTTAACTCGCAGGCTGGTATTATCTTTACTTTGTTGGGTGCTGCTGTTGATCAAC  
AAGAACAAGAAATCAAGAAAATGAAAAAAG

>novel\_circ\_001135

GCTATGACATGTCACCGTTTATCAGGAGATATGCAAAGTACCTCAATGAAAAGGCTCTT  
TCTTATAGGACTGTGGCATTGATTTTTGCAAGGTGAAGAGGGGAAAGGATGATCGTAC  
TTTACGTACAATGAATGCTGAGAAATTGTTGAAAACCTTACCAGTACTACAATCACAAT  
TGGATGCACTATTGGAATTCGATTGTACTGCCAATGACCTAACCAATGGCGTTATAAATA  
TGGCTTTTATGCTTCTTTTTTCGGGATTTAATTAGATTATTTGCATGTTATAATGATGGCATT  
ATTAATTTATTAGAAAAATATTTTGATATGAATAAAAAACAATGTCGCGAGGCTTTGGAT  
CTATATAAAAAGTTTCTCATACGAATGGATCGGGTTGGTGAATTTTTAAAAGTTGCCGA  
AAATGTTGGCATTGATAAAGGAGATATACCTGATCTAACAAAGGCTCCTAGTAGTTTATT  
AGATGCATTGGAACAACATTTAGCTTCGTTAGAAGGAAAGAAAGGTTCTGCAGCAAAT  
ACTCCCACGCAATCTGCAAGCAATAGAACGAATGTAAAGTCGGGAGTGTCCGCCCTGT  
CTTCCACCAGTACTGCGTTTGGAACAGCAGCTAGTAATAACCGCCTTGACCATGCCGG  
AAATGGACATATCGATGAAGCGCTTCGACAACAAGCTCTTGCTGAAGAGGAGGCTGCT  
ATGAATCAATACAAGGCAAAAGTGCAATCTCCATCCAGTGGCCCCAGTACGAATCCATT  
TCTTAGTTCACCGACAAACAATGCTAATCAACCAATTGTAGATTTATTTGGTGCACCATC  
AACGATAACGAATACTGAAAGCCAGCCACAAAAAGCATCAGACGATTACTTCAATTA  
GCAGGCAATCCATTTGCGGACATGTTTGGAACACCTCAATCTATAGCTGCACCGACTAC  
ACAAGCACAGAATAATATGTGGATGACTAATGGTAACGGTTTTTGCTGCAGTGCCTCCAG  
CAAATAATAATTTTGTTACAGATAATAGTTTCTCTTCTGTATTTGGTAATCAAGATTCTCA  
ATCTGCTGGTGTCTCCAGGAACGGCCGGATCCGTACCAAACCCTTTTATGTCCGACTTCC  
CTTCCCTCGGTTCCCAGTCAACGCAGCCAAACGCAGCCGCTTTCGGTCTCTTCGAGCA  
GGGTGCCGCGACCAATGTTGCTGCTAATACGAACAGTGGTGATAACCAGCAACAAACG  
CAGACCGGAGACCTGTTTCAGTGCTGGCGGCCAGGCAGATCTCTTTGGGAGCGACTCT  
GCAGTGCTCAAGACCGTGGAGGGTGTGCTGGGGAAGCCGCAGATACGGCGTCCCTCT  
GTGACTCTAGCCTCCGGTAAGTCCACTGCCACGCCGCCTCCCAGACCGCCGCCTCCCG  
CGACAGCAATAAACGGTACGCCTAGACCAGCTTCTCCAACGGTGTCCGGAGTGGCTGT  
TGGCAAATTATCTTCTGGAACAACGATCACTACCGCCACCGCTCCAAGTAAGAGCGCG  
TTTGACGATCTGAACGATAGCATTGCAATGGCACTGGGCGGGTCTCCGTCAAGGCCGG  
CACCCATAGCTCAACAACCTGCCGACCGCGCAACAAGCACAGCAACCTCTTCAACAGG  
GTTTTGGCATGTTTGATATGGCTACCAATATGGCTGCCACCGGGCAGTCGGTCATGTCA  
GGCGGACCGATGGTCGGCTACGGTATCCCCACCCAAGTCCCGGCGGGGTACGGTTCCC  
CGGCAAAGCAACCGATTTTCAGTAGCAGGACAACAACAGAATGCAGCGTCTACTGGTA  
AAGTCCTGACTGGAGATTTGGATAGCAGTCTTGCTAGTCTTGCTCAAAATTTGACCATC  
AACAAAAGTGCTCAGCAACAAGTCAAAGGTATGCAATGGAATTTCGCCTAAAAATGCTG  
CCAAAACCTGGTGGCTCAGCTGGAGGATGGACACCGCAACCTATGGCAGCTACAACCTG  
GCGCTGGATATCGTCCAATG

>novel\_circ\_001136

ACCTCGTGCGATGTACAAACGAACCCAACGTGTCGATACCTCAGTTGGCGAATCTGTT  
AATAGAACGATCACAGAATACGAACTGGACAGTCGTTTTCAAAGCTTTGATTACAGTA  
CACCATATGCTTTGTTATGGCAATGAGAGGTTTACACAGTATCTAGCATCCAGCAACAG  
CACGTTTCAACTCAGTAATTTTCTTGATAAAAGCGGCGTCCAAGCATTATGCAGCTATG  
TGTATCTGGCCTCTGTCTATGATTTACTAACCTGGAACATAATTTCTCTCTATTTGGGCAC  
AACAGGAGCTCGCATCGGCTATGACATGTCACCGTTTATCAGGAGATATGCAAAGTACC  
TCAATGAAAAGGCTCTTTCTTATAGGACTGTGGCATTGATTTTTGCAAGGTGAAGAGG  
GGAAAGGATGATCGTACTTTACGTACAATGAATGCTGAGAAATTGTTGAAAACCTTACC  
AGTACTACAATCACAATTGGATGCACTATTGGAATTCGATTGTAAGTACTGCCAATGACCTAAC  
CAATGGCGTTATAAATATGGCTTTTATGCTTCTTTTTCGGGATTTAATTAGATTATTTGCAT  
GTTATAATGATGGCATTATTAATTTATTAGAAAAATATTTTGATATGAATAAAAAACAATG  
TCGCGAGGCTTTGGATCTATATAAAAAGTTTCTCATACGAATGGATCGGGTTGGTGAAT  
TTTTAAAAGTTGCCGAAAATGTTGGCATTGATAAAGGAGATATACCTGATCTAACAAAG  
GCTCCTAGTAGTTTATTAGATGCATTGGAACAACATTTAGCTTCGTTAGAAGGAAAGAA  
AGGTTCTGCAGCAAATACTCCACGCAATCTGCAAGCAATAGAACGAATGTAAAGTCG  
GGAGTGTCCGCCCTGTCTTCCACCACTGTCGTTTGGAAACAGCAGCTAGTAATAACC  
GCCTTGACCATGCCGGAAATGGACATATCGATGAAGCGCTTCGACAACAAGCTCTTGC  
TGAAGAGGAGGCTGCTATGAATCAATACAAGGCAAAAAGTGCAATCTCCATCCAGTGGC  
CCCAGTACGAATCCATTTCTTAGTTTACCGACAAACAATGCTAATCAACCAATTGTAGA  
TTTATTTGGTGCACCATCAACGATAACGAATACTGAAAGCCAGCCACAAAAAGCATCA  
GACGATTTACTTCAATTAGCAGGCAATCCATTTGCGGACATGTTTGGAAACACCTCAATC  
TATAGCTGCACCGACTACACAAGCACAGAATAATATGTGGATGACTAATGGTAACGGTT  
TTGCTGCAGTGCCTCCAGCAAATAAATTTTGTACAGATAATAGTTTCTCTCTGTATT  
TGGTAATCAAGATTCTCAATCTGCTGGTGCTCCAGGAACGGCCGGATCCGTACCAAAC  
CCTTTTATGTCCGACTTCCCTTCCCTCGGTTCCCAGTCAACGCAGCCAAACGCAGCCGC  
TTTCGGTCTCTTCGAGCAGGGTGCCGCGACCAATGTTGCTGCTAATACGAACAGTGGT  
GATAACCAGCAACAAACGCAGACCGGAGACCTGTTTCAAGTGTGGCGGCCAGGCAGAT  
CTCTTTGGGAGCGACTCTGCAGTGCTCAAGACCGTGGAGGGTGTGCTGGGGAAGCC  
GCAGATACGGCGTCCTCTGTGACTCTAGCCTCCGGTAAGTCCACTGCCACGCCGCCTC  
CCAGACCGCCGCCTCCCGCGACAGCAATAAACGGTACGCCTAGACCAGCTTCTCCAAC  
GGTGTCCGGAGTGGCTGTTGGCAAATTATCTTCTGGAACAACGATCACTACCGCCACC  
GCTCCAAGTAAGAGCGCGTTTGACGATCTGAACGATAGCATTTCGAATGGCACTGGGCG  
GGTCTCCGTCAAGGCCGGCACCCATAGCTCAACAACCTGCCGACCGCGCAACAAGCAC  
AGCAACCTCTTCAACAGGGTTTTGGCATGTTTGATATGGCTACCAATATGGCTGCCACC  
GGGCAGTCGGTCATGTCAGGCGGACCGATGGTTCGGCTACGGTATCCCCACCCAAGTCC  
CGGCGGGGTACGGTTCCCCGGCAAAGCAACCGATTTCAGTAGCAGGACAACAACAGA  
ATGCAGCGTCTACTGGTAAAGTCCTGACTGGAGATTTGGATAGCAGTCTTGCTAGTCTT  
GCTCAAAATTTGACCATCAACAAAAGTGCTCAGCAACAAGTCAAAGGTATGCAATGGA  
ATTCGCCTAAAAATGCTGCCAAAACCTGGTGGCTCAGCTGGAGGATGGACACCGCAACC  
TATGGCAGCTACAACTGGCGCTGGATATCGTCCAATG

>novel\_circ\_001137

ACCTCGTGCGATGTACAAACGAACCCAACGTGTCGATACCTCAGTTGGCGAATCTGTT  
AATAGAACGATCACAGAATACGAACTGGACAGTCGTTTTCAAAGCTTTGATTACAGTA

CACCATATGCTTTGTTATGGCAATGAGAGGTTTACACAGTATCTAGCATCCAGCAACAG  
CACGTTTCAACTCAGTAATTTTCTTGATAAAAGCGGCGTCCAAGCATTATGCAGCTATG  
TGTATCTGGCCTCTGTCTATGATTTACTAACCTGGAACATAATTTTCTCTCTATTTGGGCAC  
AACAGGAGCTCGCATCGGCTATGACATGTCACCGTTTATCAGGAGATATGCAAAGTACC  
TCAATGAAAAGGCTCTTTCTTATAGGACTGTGGCATTGATTTTTGCAAGGTGAAGAGG  
GGAAAGGATGATCGTACTTTACGTACAATGAATGCTGAGAAATTGTTGAAAACCTTACC  
AGTACTACAATCACAATTGGATGCACTATTGGAATTTCGATTGTACTGCCAATGACCTAAC  
CAATGGCGTTATAAATATGGCTTTTATGCTTCTTTTTTCGGGATTTAATTAGATTATTTGCAT  
GTTATAATGATGGCATTATTAATTTATTAGAAAAATATTTTGATATGAATAAAAAACAATG  
TCGCGAGGCTTTGGATCTATATAAAAGTTTCTCATACGAATGGATCGGGTTGGTGAAT  
TTTTAAAGTTGCCGAAAATGTTGGCATTGATAAAGGAGATATACCTGATCTAACAAAG  
GCTCCTAGTAGTTTATTAGATGCATTGGAACAACATTTAGCTTCGTTAGAAGGAAAGAA  
AGGTTCTGCAGCAAATACTCCACGCAATCTGCAAGCAATAGAACGAATGTAAAGTCG  
GGAGTGTCCGCCCTGTCTTCCACCACTGCGTTTGGAACAGCAGCTAGTAATAACC  
GCCTTGACCATGCCGGAAATGGACATATCGATGAAGCGCTTCGACAACAAGCTCTTGC  
TGAAGAGGAGGCTGCTATGAATCAATACAAGGCAAAAGTGCAATCTCCATCCAGTGGC  
CCCAGTACGAATCCATTTCTTAGTTCCACCGACAAACAATGCTAATCAACCAATTGTAGA  
TTTATTTGGTGCACCATCAACGATAACGAATACTGAAAGCCAGCCACAAAAAGCATCA  
GACGATTTACTTCAATTAGCAGGCAATCCATTTGCGGACATGTTTGGAACACCTCAATC  
TATAGCTGCACCGACTACACAAGCACAGAATAATATGTGGATGACTAATGGTAACGGTT  
TTGCTGCAGTGCCTCCAGCAAATAATAATTTTGTACAGATAATAGTTTCTCTTCTGTATT  
TGGTAATCAAGATTCTCAATCTG

>novel\_circ\_001138

TTGGAGTACGCAGGAGCCAGAGCCGCACAACCTCACAGTTGGTAGCGTCAAATCAAGA  
ACTGCAGAATCAAACCTCAAATCAGAAAGTAGATCAAGAATTTGCTAAAATGACAGAT  
CAACGAGAACAACAACCTCAACCACAACAGCAGCAACAGGCGCAACAGCAACAACA  
AACCAAAGGCAATGAAGAACCAAGAACAATTTGATTATCAATTATCTTCCACAGAGTA  
TGACAGAAAAAGATCTTTACAGTCTTTTTGTAACCTATTGGGCCTGTGGAATCTTGTCGT  
GTTATGAAAGATTATAAGACAGGGTACAGTTATGGTTTTGGATTTGTTAATTATGCAAAA  
GCTGAAGATGCAGCCACAGCTATAAGTACTTTAAATGGCCTTCAAGTTCAGAACAAAA  
GGCTAAAAGTATCCTTTGCACGACCATCTGGTGAAGAGATTAAAGAACTAATCTTTAT  
GTAACAAATTTGCCGAGAAATATACTGAAAGTCAGATTGATGATATATTTAGTAAATAT  
GGAAATATTGTGCAAAAAAATATTTTAAAAGACAACTTACTGGATTACCAAGAGGTGT  
AGCATTTGTAAGATTCGATAAACGGGAAGAAGCACAGAAGCGATCGCACGACTACAT  
GGAACGATACCAGAAGGTGGATCAGAGCCACTTAGCGTAAAAATCGCGGAGGAACAC  
GGAAAACAAAAAGCGGCATACTACGCTGGATGGCAGGCTGGTTACAATCAGAGTAGA  
G

>novel\_circ\_001139

GTGCAGGAAGTATGGATGTTATAAGATTAGTAGAAGAGGTAAAAGACAATTTGGGAGT  
AATTTTGCAAAATATCGACGTCTTCATGTCTCCGGTTTTTCATTCAATTTGTAAATAAAGT  
AGTTTAAACAGCACGAGGTATTTCTACCTCTAAAGAAATCAAATACGATGCTGTGGAAG  
TACAAACGAACAATATGACTCTGAAATTCCTTAGACAATTATTTATTAATGGAGAATTTG

TAAATGGCCATGGAAATCCTATAGACACAATTAATCCTCATGACGAAACAATTATTTGTT  
CTGTTGAAACCGGCACTGTGGAGGATGTGGACAAGGCAGTTAAGGCAGCCAAGAAAG  
CTTTTGAAGAAGGAGAATGGAGCAAAATTAGCGCCAGAGAGCGTGGAGTTCTTCTTTT  
CAA

>novel\_circ\_001140

GTAAAAGACAATTTGGGAGTAATTTTGCAAAATATCGACGTCTTCATGTCTCCGGTTTT  
CATTCAATTTGTAAATAAAGTAGTTTTTAACAGCACGAGGTATTTCTACCTCTAAAGAAAT  
CAAATACGATGCTGTGGAAGTACAAACGAACAATATGACTCTGAAATTCCTAGACAAT  
TATTTATTAATGGAGAATTT

>novel\_circ\_001141

ATACGGTTGCGTTGAGAATGCTGGAACCTGGTGGTACCGCAGCACGTAGTCCGTGGTCA  
AAATATCAAGTTAGAATGCAACTTCAATCTAGACGGTGAAACGTTGTACTCGGTGAAAT  
GGTACAAAGACGGAAACGAGTTCTATCGATACGTACCACAGGAAAGGCCGCCTGTGCT  
CGTTTTTCAGCTGCCAGGTGTCACGGCGAACATTCACAATTCGACCGAAAGATCGGTC  
GTTCTCCATTCTGTGAATTTAATGAGTACTGGAAGATACAGATGTGAAGTGTTAGCGGA  
GGCGCCATATTTCCAAACGGTTTCCGATCACTCGGACATGCTGGTAGTGGCTCTGCCGG  
AAGACGGTCCTATTATCACTGGTAGACCAGGAAGACATCGTTATCAAGTCGGTGATGTG  
GTTTCGGTTCAATTGCACTTCGGCGAAATCGAAACCAGCTGCCATACTCAGCTGGTTCAT  
CAACGGGGAGCCTGTTGACACGCAATACTTGAGAGGGCCTCACATCACCGAGGTGGAT  
CGTGAGGGTTTGAAACGGCTGTGCTAGGTCTGGAGTTTCGTCTGCGTACGAAGCACT  
TCAAGAGGGGTGATCTGAAGATCAAATGCCTGGCAACGATAGCGACTGTATATTGGAA  
ATCGAACGAGCTCAGCATAGAGGGTGAAAGGCCCTCAAGATGCCCCTTATGGAGAGC  
AGGGAGACAAGGGCGCAAGGCCATACGCATGCGGAACATATCTTAGGAG

>novel\_circ\_001142

AAACCAGAGACGAGTCGAGAAAAAAGAACGAAATCCGGGGAGAAAAAGTAGGAAG  
GGAACCGAATCGAAGAAATCGAAATCGAATCAAGAAAGCCGATCCTTTTCCTCGCTGGA  
TGAGTCGCAAGCTGGAAAGGGGCCTCGCCACGGTTCCAACCGTATCCAGTGAATCGCG  
ATAGAGAGCACCTCGACACGTCTGCCCCTTGACAAAAGGGTTTGGCCACTCGTCGC  
CCCTCCAATCCCCTCTCGCCATCACGCTCCTCCAACAGGGAATTCAGGATCGAAGATCG  
CCCGTTGATTGTCACGGGAGAGCGAGAGGATCGTTGAAGGCAAGATCGTGTCGGCG  
CCAAAGTATCTCATGAAGTCGACAGGCGACAGCGGCAAAGTCGGGGAGCGATTGTTG  
AGCATAACCGACACGGGATCGAGCCAATATCGCGGCACCAGGTGAATCGAAATCGAGG  
AACGCCTGCCCCGAAGCGAATCCAACCTTCGTACCATGTACAAGATCCTTCGACGCGG  
TTCAAGCCGCGTTTTTCGTGTTTTGCGCGGTCCTTCTCACTTTGCTGCTATGTTTGTACTA  
CGTGAATCAGGCACAGGCGCCATCCACGGGCCCCTGCGGGAATTTTGAACGAAGA  
GCTCAGATACGACAGAGGTCTTACCTCCATCACGCCGGATTACGTGGAATCACCGGAC  
GCTAAGGTCTCGTTGGACACCTGCCCCATCATTGTGCCTAGAAACGTGGATATCGACAC  
GCAGCAGGAGTTCGAGAAGTTCGATTTTCAA

>novel\_circ\_001143

GGTTTAAGAAATTGATGCACGGCGAAGGGGCCTTGAAGAACACCGTGTTGACTGCTCT

GGCGGAGATGATTGGCACTTCCATGTTGGTGTTCCTTGGATGTATGGGATGCGTTGGAA  
GCCTTGGTGTTCCTTCTCACTTCCAAATAGCCTTAACCTTCGGCCTGGCTGTGATG  
ATTGTGATTCAAGTCCCTTGGCCACATCAGTTTAGCTCACATTAACCCTGCCATCACGGT  
GGGATCGGTTGTGCTTGAATGAAGACTATCCCGAAGGTTTGGTGTATCTCTTGTCTC  
AAGTAGTCGGTGGAGTCTTAGGATTTGGAATGTTAAAG

>novel\_circ\_001144

ATCAACAAGTTGGAAGAATAATTATTTTCAACCATTTTTGCTGATGCTGTTCTTGTGTGC  
CAAGGTAGCCTCCTCTTAAAGATGTAACATCAACTATTGAAAGGTGTAGCTTGTGATCA  
GTGATTGTTAATTGTTGAACAATTTGTGCCAGTGCAATTTTGAGAACTTTGAAAAAC  
AAATCCCTTTCAAAGAAAGAAAGAAAGAAAGAAAAAAATTAGAACATTTTGAAAGA  
ATCAGTGTGAACAGTGGAGGGCTTGCCCGCCTATTGGGAGGACTTAGCCGTGCAGCA  
TAGTGTAATGCAGCTGCAACGGCCAGCATTTTTATGAATTACGACCTGGACAAACCG  
AGGATGGTCTCGCACGTCATTCCCGTCGCTGGG

>novel\_circ\_001145

AATGTCCCGATGGTCAGTTACCATGTGACAACAAAGTGTGCATCAACAAAACTTCTT  
CTGCGATAACAACATCGATTGTACGATGGGAGCGACGAACGCGATTGCAATAATGCC  
GTGACTCAACCACCAAGATGTCGCGAGGACGAGTTTACTTGTGCGGATGGAACCTGCA  
TTCCGCAATCAGCCCTCTGCGACGAACGACCCGACTGTCCTTACGCGGAGGACGAGGC  
CAATTGTCTTCAAG

>novel\_circ\_001146

TTCGATGTCGGTCAGACGAGTTCGAGTGCTTAGACGGAAGTTGCGTGAGCCAAACCGC  
GAGATGCGATGGAAGATCCGATTGCAGGGATCGTTCTGACGAGTACAATTGCACCGTG  
ACCACCTGCAGCGGGGATCAATTCAGGTGTCTAGACGGTACCTGTATCAGCATCGACA  
AAAGGTGTAATCACAACATAGACTGTCGCAATGGGGAGGACGAGAAGCAGTGTG

>novel\_circ\_001147

AATGACGATCTAGTATTTGATCAGGATGGCAAGCAATCTTTAGACGAGATACCTTTGATT  
GAGACACGCCAACAAGACTCCATACTTCACAGGTTAAGAAGAGGATTGTTTCGATTTTT  
TTAATCCAACCTACATCTACTTCTACTGAACCTTCAGAACCTGGAGAAAATAACGCGGAC  
AATGAGTTGGACAACGATCCTCTCGTTCAATCCAACGATGACGAATATTGGAAAAATC  
AGCCCATGATACTGCAGATGAATTCGAAGTGGAAGCTGATGAGGACAATGAAGTTGGA  
AATGCGGCTGAAGGTCGAAGAGAATCAGCAAATTTTGAAACAGCGACGACGAGGAT  
CTTGCTGGATCTGGAGAAATGGAGGGCAGCGCTGATGATACGCGATTGCACAGTTTTAT  
ACCAATAAGAGAAGAGAAAAAGTATTATAGAATAACCTTGACAGTTGGAGAACCGTTC  
AGAAGAGAGTATGTGGATAGGAACAGCAGAGAGTACAAGGAGCTAAGTGGCAATCTA  
ACTCAACCTTTGGAAGAGTTGTTGAACCGTTATATTCCTAATGAAAGTCACCATGCCAA  
CGTTATTAAAATTTTCGCCAACGTCCGACAGCTTCACGTCACAAGTTACCCTAGACATCG  
GTTTCGACGTTACGGATGAGATGGAGGTGCGGAACGTCATAGAGCAACAGCTGCACTT  
ACATTCGTTGGGCAACGTCCAAGTTCGACCAGAAGAATTCTCGTTTAGAGTATTTCAA  
GTTGGAGAAGAGATAGAGGAACCGGAATGCGACCAATCGACCGAGATAAGGTGTAAA  
GATGGTACATGCGTGCCGGTCAATGGCGATGCGATGGGATTTCTAATTGTAAGGATGG

TTCTGACGAAGAAGGTTGTCCTGAAACGACGACACATGTCAGCGAGAATATCACAGAA  
TTTTACGAGGAAATAACTAAGGAAATTA AAAAAGGAAGAAGACGTTGAAGGAGTAAAA  
TTAAGCAAATGTCGCGCCGATGACACTGTTTCGTTGCAGCGATGAAAGTCGTTACATATG  
CTCTGTACAGAAATGTGACGGCGTCAAGGACTGCGATGATGGAGATGATGAAGTTGGT  
TGTCCCCATCCAGGATGCAGTCCTGGAGAATTTCGCTGCGACGTATCTAGGTGTATACT  
CGCATCGCATCGATGTAATTTCATAAAAGAATGTGACGATGGAAGTGACGAATATGACT  
GCAGCTATCCTG

>novel\_circ\_001148

ATAAAAGATGAAGGGTTGAAACCTGGTACGTCCGTAGAAGAAACAGTAGTAGAAGAA  
CGTTCAAAAAGACGAAGACTCGTGCGGAGATTGTGGACAATATTAGTGAATGGAGTC  
AACAACAACAAAGAGCTCTGGAAGCAGCCCTTATAAAATATCCTAAAGGCACATCTAC  
AGATAGATGGGAGAAAATCGCAAATTGTGTTGAAGGAAAAAGCAAG

>novel\_circ\_001149

AAGTAGCAAGGACGAGACTTAGAGAGGAAGGTACGAAATACCAGACTTTCTGGCAAA  
CATTGAGCACAGTCTACGCTGAAGAAGGATTTTCATGGTCTATATCGTGGTCTTGGTACT  
CATCTAATTAGACAAATTCCAAATACAGCAATTATTATGGCTACGTATGAAGCGGTGGTA  
TATTTGCTAAGCAAGCACTTTACGAACGATCTTTAAGCATAAACAATGAAAGCGAGTC  
CAAGTTCTATACAGATCCAAAGGGTAAACGAGAATTGGCCTAGGACTTACTCACGGCC  
CCTGAGTAAAGGGCCAATAATTCGCATGCTGCGGCGAGTCTTGAAATTGCATCTGTTTT  
GAAAAAAGAAAATGAACCATAAGAACAACAACGCCGTCCAAGAGAGAGTCCATACG  
CCGGGAGAGAACGCATTTCCGAGTTTGGGGCCATGCCGGCCGGCCAGGTCCAATCGA  
ACATGTCGAAGGTAGCAAAATAGGTATCACAGCGCGTTGTACGCTGCTGTGTGCTCTAT  
AAGTGTAGCAAAAAGTAGTCCTTCCTCCTTTCAGGTAGCGTACCTACGTACGCGAGGA  
ACAGCCTAACTGTCTGTCTGTACCTTCGTCGACACATTACACACACATACACGGAG  
GCGAGGATCGTGAAGCTGGATTAAATGAGTCAATTACATAGACTCAGAATGCTCCAAA  
A

>novel\_circ\_001150

GGTATCCTGGGATTCTACAAAGGCATTATGGCCTCCTACATAGGAATAAGCGAGACTGT  
GATACATTTTGTGATCTACGAGGCTGTGAAGGCCTCTTTAGCAACATACAAGGCTCCCA  
ATGCAGATCGAAAAACATTGCGCGATTCTTAGAGTTCATGGCGGCTGGCTCGTTCTCA  
AAAACGATTGCCTCCACCATCGCTTACCCCCATGAAGTAGCAAGGACGAGACTTAGAG  
AGGAAGGTACGAAATACCAGACTTTCTGGCAAACATTGAGCACAGTCTACGCTGAAGA  
AGGATTTTCATGGTCTATATCGTGGTCTTGGTACTCATCTAATTAGACAAATTCCAAATAC  
AGCAATTATTATGGCTACGTATGAAGCGGTGGTATATTGCTAAGCAAGCACTTTCACGA  
ACGATCTTTAAGCATAAACAATGAAAGCGAGTCCAAGTTCTATACAGATCCAAAGGGT  
AAACGAGAATTGGCCTAGGACTTACTCACGGCCCCTGAGTAAAGGGCCAATAATTCGC  
ATGCTGCGGCGAGTCTTGAAATTGCATCTGTTTTGAAAAAAGAAAATGAACCATAAG  
AACAACAACGCCGTCCAAGAGAGAGTCCATACGCCGGGAGAGAACGCATTTCCGAGT  
TTGGGGCCATGCCGGCCGGCCAGGTCCAATCGAACATGTCGAAGGTAGCAAAATAGGT  
ATCACAGCGCGTTGTACGCTGCTGTGTGCTCTATAAGTGTAGCAAAAAGTAGTCCTTCC  
TCCTTTCAGGTAGCGTACCTACGTACGCGAGGAACAGCCTAAACTGTCTGTCTGTACCT

TCGTCGACACATTACACACACATACACGGAGGCGAGGATCGTGAAGCTGGATTAAAT  
GAGTCAATTACATAGACTCAGAATGCTCCAAAA

>novel\_circ\_001151

GTTTCGTCGCATGCACATTGACAAATCCTATTTGGTTCGTGAAGACCAGGCTGCAACTG  
GACCATCGAACCAACAAAATCACTGCGATGGAATGTATGCAAAGGATATATCAACAATC  
GGGTATCCTGGGATTCTACAAAGGCATTATGGCCTCCTACATAGGAATAAGCGAGACTG  
TGATACATTTTGTGATCTACGAGGCTGTGAAGGCCTCTTTAGCAACATACAAGGCTCCC  
AATGCAGATCGAAAAACATTGCGCGATTTCTTAGAGTTCATGGCGGCTGGCTCGTTCTC  
AAAAACGATTGCCTCCACCATCGCTTACCCCCATGAAGTAGCAAGGACGAGACTTAGA  
GAGGAAGGTACGAAATACCAGACTTTCTGGCAAACATTGAGCACAGTCTACGCTGAAG  
AAGGATTTTCATGGTCTATATCGTGGTCTTGGTACTCATCTAATTAGACAAATTCCAAATA  
CAGCAATTATTATGGCTACGTATGAAGCGGTGGTATATTTGCTAAGCAAGCACTTTCACG  
AACGATCTTTAAGCATAAACAATGAAAGCGAGTCCAAGTTCTATACAGATCCAAAGGG  
TAAACGAGAATTGGCCTAGGACTTACTCACGGCCCCTGAGTAAAGGGCCAATAATTCG  
CATGCTGCGGCGAGTCTTGAAATTGCATCTGTTTTGAAAAAAGAAAATGAACCATAA  
GAACAACAACGCCGTCCAAGAGAGAGTCCATACGCCGGGAGAGAACGCATTTCCGAG  
TTTGGGGCCATGCCGGCCGGCCAGGTCCAATCGAACATGTCGAAGGTAGCAAAATAGG  
TATCACAGCGCGTTGTACGCTGCTGTGTGCTCTATAAGTGTAGCAAAAAGTAGTCCTTC  
CTCCTTTCAGGTAGCGTACCTACGTACGCGAGGAACAGCCTAAACTGTCTGTCTGTACC  
TTCGTCGACACATTACACACACATACACGGAGGCGAGGATCGTGAAGCTGGATTAAA  
TGAGTCAATTACATAGACTCAGAATGCTCCAAAA

>novel\_circ\_001152

CATTGTCAAACAGAATGGGATGCGGGTGCATTGGAAAACGGTGAATTAACGCAACTGC  
GAGCAGCCTACAACCATCAATTGGAAGAACAAGTTGCGCTAGCTAAATTGGATATTATT  
AATGCACTTCAAGAACAAATTCAGGTACTTTTAACGATCGAGTCGGACGTAGAAGACA  
ATTGGCCAATAGAATTGCTAGAATTGCGAGATAAACTAACTGGTAATGCAAAAAAAGA  
AATGCAACTGCTCAAAAATACACATATTGAAGAGGTGCAACATTTAAAAGAAGAGCAT  
TCTCGAACTGTGACTAAGATGATTGATTGTCATCGAGAAGAAGCTTAATAAAATTAAATC  
AGAATATCTCCAAAATTATTGTGGTGATAGAAGTTTGTTAATAGATAATAAGATTTTTGA  
AGAAAGAAATAATTTAACTAAAACATGCACCACTCTTAAACTTTAATTGAAGAATTGA  
TAAATACTTTATTGTTTGTGAAGAAGAAATTAATAACACTCTTTTTACTGAAATTACTA  
AAAAGCAATTATCTGATAGTGTTAATAATGAAAAAACCATGCAATTTGATGAACTGAA  
GGATTGAAATGTAATGAATTAATAATGAGTTCAAAAAAGGATTCATTGAATTTATCTGA  
GATGATTGTCCGAAAGGTGCATTTTGCTCCAAAACTACAGAAATAGTTTCAATAATAA  
ACAGCAATGTTGAACTTTACCAACTATTCTAGAAGAAGATGATAATATAACAGAAAAA  
TTAAAACAAGAATTAAACAATTGCATACTTCGTTTGAAGTCTGAGAGTGCTGAAATTCT  
TAATACTTCATCAATTGAAGGAAAATTATCTTCGAAAGATACTTTTTGGTTGAATAAAAT  
GAATGAAGAATTAAATTTGAACTTCATCATGCTGAACTTTAATTATGGGTTACCAAG  
AAGAAATTGATCATCAGAAAATGACTATTTTCGATCTCCAAAGAAAGTTGGTTAATGCA  
GAGAATAAAAAAGAAACAATCACAGAAGGTTATGGGGAAAATTATGATGTGGGTATTG  
ATACTACATTACAAGACTTTTCACAATTACAAGAGAAAGTCAGACATGTATTATCAAT  
GGAGGAGGAGATTGTACAGAATTGTTACAATTGATAGATGAATTGTCTAGACAGAGTGA



TAAATTGATGGAAGAAGCTAAAAAAGAAAAGGAAGACTTACAACAACAGCAGGTGCC  
TTTAGAACCTACTCCTACCCCATACATTACAGGGTTTGCCACCGAAAGATCGAGGCAG  
CAGATAACAATTAAGCAACCCGTAAATTTTGGATGAACAAGCAAGTGAAAGAGA  
AGCAGAGAGAGATGAAGCTGCAAAACAAATACATATTCTGCAGGAACAACCTAAAGA  
GCGTGAACGAGAGAAAGAAAGAGATCAACGTATCACATCTGAA

>novel\_circ\_001153

GTATTGGAATAGACGATACGTTTGTGATGCTAGCTGCTTGGAGGCGAACCAGTATAATG  
AAACCGGTACCTGAAAGAATGGCTGCGACTCTTAGCGAGGCTGCTGTCTCGATTACTAT  
TACTTCCTTGACTGACATGATATCGTTCTTCATCGGTATTCTCTCACCTTTTCCCTCTGTT  
CAAATTTTCTGTATTTATTCAGGATTCGCCGTAGTCTTCACCTTCGTGTTTCACCTGACC  
TTCTTCACAGGCTGTGTAGCCATCAGTGGCTATTGCGAGCAAAAGAATCTTCATAGTGT  
AGTATGTTGCAAGGTGCAACCTCTCTCCAAGTCTT

>novel\_circ\_001154

TACACGGAAGTGGGAGGAGGTGTACAACGGGTATATTTACCAAAAAATGGTCGCGGACG  
TGGTTGGCGACTACTTCTTCATCTGTCCCTCGATCCATTTGCCCCAATTGTTGCGCCGATC  
GTGGCATGAAGGTCTACTACTACTTCTTCACGCAAAGGACGAGCACCAATCTATGGGG  
CGAGTGGATGGGCGTATTGCACGGTGACGAGGTTGAGTACGTGTTGCGCCATCCCCTG  
AACAAGTCTCTCAAGTACAGCGACAAGGAACGAGACCTGTCATTGAGGATGATACTCT  
ACTTCTCCGAATTCGCCTATTTGGG

>novel\_circ\_001155

TACACGGAAGTGGGAGGAGGTGTACAACGGGTATATTTACCAAAAAATGGTCGCGGACG  
TGGTTGGCGACTACTTCTTCATCTGTCCCTCGATCCATTTGCCCCAATTGTTGCGCCGATC  
GTGGCATGAAGGTCTACTACTACTTCTTCACGCAAAGGACGAGCACCAATCTATGGGG  
CGAGTGGATGGGCGTATTGCACGGTGACGAGGTTGAGTACGTGTTGCGCCATCCCCTG  
AACAAGTCTCTCAAGTACAGCGACAAGGAACGAGACCTGTCATTGAGGATGATACTCT  
ACTTCTCCGAATTCGCCTATTTGGGAAAACCAACGAAAGAAGACTCTGAATGGCCATC  
GTATTCGAGAGACGAACCAAAATACTTCATCTTCGATGCGGAGAAGACTGGACTTGGT  
AAAGGGCCACGTACCACGTATTGTGCTTTCTGGAACGAATTTCTACCAAAGTTGAAAG  
GAATACCAG

>novel\_circ\_001156

TACACGGAAGTGGGAGGAGGTGTACAACGGGTATATTTACCAAAAAATGGTCGCGGACG  
TGGTTGGCGACTACTTCTTCATCTGTCCCTCGATCCATTTGCCCCAATTGTTGCGCCGATC  
GTGGCATGAAGGTCTACTACTACTTCTTCACGCAAAGGACGAGCACCAATCTATGGGG  
CGAGTGGATGGGCGTATTGCACGGTGACGAGGTTGAGTACGTGTTGCGCCATCCCCTG  
AACAAGTCTCTCAAGTACAGCGACAAGGAACGAGACCTGTCATTGAGGATGATACTCT  
ACTTCTCCGAATTCGCCTATTTGGGAAAACCAACGAAAGAAGACTCTGAATGGCCATC  
GTATTCGAGAGACGAACCAAAATACTTCATCTTCGATGCGGAGAAGACTGGACTTGGT  
AAAGGGCCACGTACCACGTATTGTGCTTTCTGGAACGAATTTCTACCAAAGTTGAAAG  
GAATACCAGATCCAGCGCCCAATACCTGCAAGGTGATAGCCTCGAGCGTGTGCGCCGG  
CGAGGGGGGGCTAGGGAATCCCTAGCGATCACGGCGCTGTCGTCGATCCTTGTCTCTG

TCGAGAGTGATTTAAA

>novel\_circ\_001157

AGGACGAGCACCAATCTATGGGGCGAGTGGATGGGCGTATTGCACGGTGACGAGGTTG  
AGTACGTGTTTCGGCCATCCCCTGAACAAGTCTCTCAAGTACAGCGACAAGGAACGAG  
ACCTGTCATTGAGGATGATACTCTACTTCTCCGAATTCGCCTATTTGGGAAAACCAACG  
AAAGAAGACTCTGAATGGCCATCGTATTCGAGAGACGAACCAAATACTTCATCTTCG  
ATGCGGAGAAGACTGGACTTGGTAAAGGGCCACGTACCACGTATTGTGCTTTCTGGAA  
CGAATTTCTACCAAAGTTGAAAGGAATACCAG

>novel\_circ\_001158

AGGACGAGCACCAATCTATGGGGCGAGTGGATGGGCGTATTGCACGGTGACGAGGTTG  
AGTACGTGTTTCGGCCATCCCCTGAACAAGTCTCTCAAGTACAGCGACAAGGAACGAG  
ACCTGTCATTGAGGATGATACTCTACTTCTCCGAATTCGCCTATTTGGGAAAACCAACG  
AAAGAAGACTCTGAATGGCCATCGTATTCGAGAGACGAACCAAATACTTCATCTTCG  
ATGCGGAGAAGACTGGACTTGGTAAAGGGCCACGTACCACGTATTGTGCTTTCTGGAA  
CGAATTTCTACCAAAGTTGAAAGGAATACCAGATCCAGCGCCCAATACCTGCAAGGTG  
ATAGCCTCGAGCGTGTGGCCGGCGAGGGGGGGCTAGGGAATTCCCTAGCGATCACGG  
CGCTGTCGTCGATCCTTGTCTGTGCGAGAGTGATTTAAA

>novel\_circ\_001159

TTGATCTACCTTAACTTTCCATCTTGATTGGTAATCGGTTATCAATCAATCAACAGGGAA  
ATTTGTTACCGACCGTAAATCTTCTTATCGAATGCAAACCTTTTTATCGGCATTAAATTAA  
TTGAATCGAATTCCATATTCCAGTATTCGCAATTTGCAAATTGTGCATGCCATACGCATG  
ACATATACATACATATATGTACATTAAATTATGATCATATTTAAATTGATATTTCTGGGCCAA  
AAAGCAATTTTTTTAGTTGCCCCAACAAATATCTTTACATCATATTTTTCAATTTTTTTTT  
TTTTTTTCTTATATACATGATCTTCAGTATTGTATTTGTACGTGATTTTATTAATCACAACG  
GGCAAAAAAATACGTTTCTTTAATCTAAAAGACAGCGCGTGTCTTCTCCCTTCGTT  
CCATGATTTTTTTTTGTTGCTTTCTTAAAATATATCAACTACTATTTTGAACCAAATATCGA  
CAATTTGTCAGCTCATGAGATAATACTTTGATGCTTTTAATAACTATGACTACTTTTTACT  
TTTTATTTTTCTAGGATATTGCTCTCAAAATATGATGAATGATCTTTGAAATTCTTTTTTTA  
AGAGAGATATCTAAATTCTGGAATCAAGCCATTGGTTATAATACTACATTAGATACAAGT  
ATTAGGTATAAGTACACGTGTGATTGAAATTTTATTAATAAATTTAGATTAAATTTTAAAT  
TTCAAAACTTACACGGAATTACTGTGGAGGAAGACATAGGTCCTAATCTGCTGTAAAGT  
TGTGATGGAAAAGTAAATACGTTTCACAAAAATATTTGCTTTTATCTACAAATAATTTG  
TAGAATTTTTTAAAAAAATAATTAGTGTACAAAGATACTGTATCAAGATCTGTTTAAACA  
AATTTTTTTTTTAATTTTGTAGGCAATAACCCGAGATCTTGACCAACAACATGCACACAA  
AAAGAAATACGCAATAGCTCTAGGTAGTGAAAAATCCTGGTAAATCGCATTTTCGCTGAC  
AATTGGTAGCAACAATAAACTTTAATAATTTCTACAATGTTGCTTGAATGAATGCTTGAT  
CATAAGTTGATCTTATAAAGAAGCGAATGGCAAATTTATAAAATCTAAAGCATTCTAAA  
GTATTTGTTCTCTGAGCACAATGATAAAAAATTATCTTTTGAAAAATATTTTAAAAATATT  
ATAATAATATGCTGATATCTTAAAGCTTGGTACAATTATTACTTTCGCGAATCTGTGCCTG  
CACACTTCGAAACGTTTCGATCGAAAGTATCGAAAACCTTTGTCCCAAGCCATTTACTAAT  
TTTCTCTACAGCAAGTACGAGCCGACGTGTATTGTTAATAATATATTATCGAACTGCGGG

AGGGAGCGTTTCACGGCCTTTTAGACCTCTCGACGAAAAACCAATACGATATTGGTCG  
ATCCAATCGTTCAAAATCATCGAAGATAACATCACCATCGACAAACCAGGATCATCAAG  
AAATGTTTATACGCTTGAAAACTTTTTCTTCATTCTCTTTACCTTAAGAAATATTGGAC  
CATTATCCTCTTCGAATATTTTGAACGATCGTTTTAAAGGATTACAATGTTTTCTCGATC  
CATGCGTGTGATATAAAATAGCTCGAGACTCGTGAACATTAAGTTAGGGAATGAAGGATC  
CAGTCCTCCTTTTTATCATTTTTAAAACATTCTCGAACTCTCGATTAAATTCTTACTTATA  
AATAGAACTCGATTATCTTCCATAGATAACGCGTGGGAGGCCACACCGAGTTATTTTAAT  
AAGCGGACGAAAATGTTTACGAGAAAAACATCTTTCTAAAACATTCTCTAGTATCATAC  
AAGACTCTTAACTCTAGTCAGAGTATTGTCCGAGAGACAGGGCAAAATATAATAACGTT  
TTGGATAGTTTTTTTTAGAATCTCGTGTGATACAGAATGTTTGAATATTTTCCACTAATTT  
TCGATAAAAAGAGAAATAAATGTATATACGTGTGTGTGTGTGTGTGGCATAGCCTCTGA  
TCTCGCTGTGCGATAGAATGAACAAAATTCTACATCATTATCATTAAGTCAAGTATCA  
TCGAGATAATAATCGATATCGATCAAACGAAATTAATAATTATCCGTTGTTATATATCGAA  
AAAGAAATAAGAAAACGAATGGCAGTTGCGACTAGAAGAAGAGTAGAAAATATAGGC  
GAACATGGCGAACTCTACACCCGTCGATCAGAGTAAATTAGAGATCAATAAGTTGTACA  
ACCCTCCCGGGGCTTCATTCAAAAAGCTCAAAAAGCGATTCTAAAGGGTTTGAGAGA  
AGCGGTAAGACAATTTTGAAACCTGTCAACATTCTTAGGAAAACAGAAATCCTCTTATG  
AAACCTCTATTTCCGCTCCAATCGAGTAGAACGCTACAAAAATAGTGCGAACAACCTGT  
TCGATACAAATACGATACATACGAACGAGTATATCTTCGATCCATATATAAAAAGTAGAA  
AAAGTAACATGGTGACCACAGCGGCAATATAAAGCAAGGTTTGAAGCACGAACCGGT  
TCTCTCTCTTTCTTTCTCTCTTCAAACCAGGTTGGATTAAAAATTATATCTTAATGTATAA  
TTTCACCCTTCGCACCATTCTTTTTTTTTCTTCGTTTATATTTCTTCGACAAATTATCAAT  
TCTCTTCAATTCTTTCTCATAGAAAAATTCCCTACGAATGCAAAGTAACAATAAAAGAT  
GGATAAGCGTTATTACACTACCACTGTATAGCTTGTATTTTGTTCGCTTGTTCAAATGG  
GTGGGTGCAATGGGTGAAATGTGAAAAATACAAGATATTAGATAGAAAAGAAAAATGT  
ACAGAGAAGATAACTCTTCATCTGCTTCTTCGCATCGCCAATCCATTCGAGCTCCACAC  
TTGCATAACGTAAGCGTAAAAAGGCTGCACTCGTTTCAATAATGTCTTTAGGCTAAACC  
GTCTGTATTTAACTTGTCTAAACCCTGTGTGTGATTTTTCTCACAATTGCTATCTCGATT  
CG

>novel\_circ\_001160

TACGCTTCACAAGAGAAAAATGGCGAAAGGTTTATGACCTCGTCTGACTTCGTCCGAA  
CTTATCTTGGACTCTACACCAATCCTGATTACAATCCTGACTCCGTCAATTTGCTGGCTG  
GTATCGTCGATACCAGTAAAGATGGACTTATATCATTCGCCGAGTTTCAAGCGTTTCGAA  
GGATTGCTCTGCGTACCAGATGCTTTGTATAAGACAGCTTTCAGCTGTTTGATACTAAT  
GGAAATGGAATGGTTGCATTTGATGAGTTTCGCTGAGGTGATGCGGAAAACGGAACTCC  
ATCGGCGGATGCCCTTCAATATGGACAGCAGTTTCATTAACTTTACTTTGGAAAGGAT  
AAGCAGCGACTGATAAGCTATGCGGAGTTCAGTCAATTTTTGAC

>novel\_circ\_001161

TCACGAGTTGCTCGGTTGCGTCATCGGCGGCGCTCGACGATGCATCGTCTCTCCCGAG  
GATCTCCACGGGTTCGCTATCCTCCCCGCCGTCTTCCCACCAGGAGGCGCGGCGCGG  
GTGGCGTTCAAGGTCACGGCTTCGTCCACCACGTTTCCCGACAAGTCAGACAACACC  
GCCACGTCCTCGGCTTTCGTGCGGTTTGCCAGGTAAGTGCCTCTTAAACACACGCTT

```
>novel circ 001162
```

```
>novel circ 001163
```

GTCAGTTTCGTCGTCGGCGTACAGCAGTACGGGTAGCGGTAGTGGTACGGGCACGAAT  
 GTGACGACGAACGGAACCAGCGGCACTAGATTTCGGCTTGTCTACATCGTCGTCTCAT  
 CGAGCATCTCTGCCGGCGGTTTCGTCCAGAGACAGAGGGATCCCCGAATCCTCGTCTAG  
 GCTAGAAATAACGGCGGACTTGATCAGGTATTCGCCGTCCGGTTACATACCGAATATCC  
 GTCAAACGAGCAGCACCCTGGCAGCACCAGTGGGATCCACCATCATCATCACCATCA  
 CCACCAGTGGAAGCACCCTCGACCGGTTTCGTCTGTGACGGAGTTGTTTCGGTGGTGA  
 CGATCGTGACGTAGCCGTCGAACGTACCGGCAGAGATCATCGTCCAGAGTCGTCTGCTC  
 TCCTCGTCCTCCTCGTCATCTTCCTGCGCCGTTGGTGGTGCCTCTGGTCCAGGTCGAA  
 GAGAAGGCCACTGTCCAGCAGCACGGTGCTCAACAGCGGGCATGCACGCGCGGACAG  
 TGCCGCGTCGCCTGGCGAGGTAACGATTAACGAGCGCGCCACGATCCGCGACCTAGAC  
 GACGAGGACGACGACGACGACGACGACGATGACGACGACGACGACGATGACAACGA

CGACGACGACGAGGACGAGGACGGGAACAACACCGACGACGATCAACACAACAACA  
ACAATAATGGGAATAACAGCAGCGGTGCCGAGGACACGTGCGATTCCGCTCGATATGG  
GTCGAACAATAACAACAACAACCGTGACCGTGACCGCGACCGCGACGACAAGGA  
CGACAAGGACGACGGGGACGACGAAGACAAGAACAAGCTGAACAACCGGCATCATC  
GCCAACAGCAGCAGCAACGCGGTGCTGCCCATCGGATCGACGAGGTTTCACCAGCTA  
AGCGTAACCTCTTGTCGTCTATACCCGGTGGCGGTGCTGGCGGTGCTGGTTTGATCGGT  
GTTAAGCTCGACTTGCTCACTAACCTAGCCACTAATCCGAGTAACGGCCAACTGCTGAT  
TAACAACAACAACAACGGTCGGAAGATTATCCAAGAAGGTGTGGAAGAGAAGGAGG  
AAGACGTCGAGATCAAAGACGTCGAGGGCGGGAATCGTGGCGAGGTAATACACGGGA  
TCAACGAGGGCCGCCATCTCTGTGCGACGCGATTGCGTTCCTACGTGGTGGTCGTACCGG  
GGATCCAGAGTGTCTCGAACACGGTGAGGAGCAACGGACCGCGTCTACCTCGTACGAT  
ATCGATCAGACCGGGTTCGTAGGCGGCATTACGCCGCCCATCTTGCAAAACGGCGTGG  
CGGAAGACCGTCCGGTACTTATGGGGACGACCCATCCGTGCCTTCTACATCCAGGAG  
ACCGGATGGTCACTTCGCGGGGACAAACACTGCCAGTAATCTGACTTCCTCGTCGCC  
ACCGCACCGTCCACGGCTCACCAAATCTCTATCGCGGGGTCGTCGATCAGTTT

>novel\_circ\_001164

GAAGGGGTTTCTATAGAAGAAAGAAAGAGAGAAAAAGAGAGAGATTGTGAGACTGG  
TGAGACCCGGGTGCAATGTCGTATCACCGTGGGGGCCAGGCGGGCGCCGTAGCAGTTT  
CGTACAGCACCAAGTCCAATGGCACCGCATTCTCCTAGCAGACGATGTTCCAGCAATAA  
CAGCGGCAACAACAGTTCCGCTATTGGCACCTCCACCTCGAAGCTGAACACCTACAGA  
TCTACTGCTTCCTCGTCGATCTTAGATCGACCAACAAATTTCTACTCGACATCGTCGTCG  
ACGTCATCGTCGTCGGGCAGCTCGGGCTTTCGTTTCGAACCTATACGACCGAGTACAGGC  
GATCCTACTGCCCATCAGGCAGTTTCTACTCATCAACGGGTACGAGCATCCGAAGGAGT  
TACTTATCGGAATACAACCGGTCTCGCTGCTCACCCACAAGGTCAGTTTCGTCGTCGGC  
GTACAGCAGTACGGGTAGCGGTAGTGGTACGGGCACGAATGTGACGACGAACGGAAC  
CAGCGGCACTAGATTTCGGCTTGTCTACATCGTCGTCCTCATCGAGCATCTCTGCCGGCG  
GTTTCGTCCAGAGACAGAGGGATCCCCGAATCCTCGTCTAGGCTAGAAATAACGGCGGA  
CTTGATCAGGTATTGCGCGTCCGGTTACATACCGAATATCCGTCAAACGAGCAGCACCA  
CTGGCAGCACCAAGTGGGATCCACCATCATCATCACCATCACCAAGCAGTGGAAAGCACA  
CTCGACCGGTTTCGTCGTTGACGGAGTTGTTTCGGTGGTGACGATCGTGACGTAGCCGTC  
GAACGTACCGGCAGAGATCATCGTCCAGAGTCGTCGCTCTCCTCGTCCTCCTCGTCATC  
TTCTGCGCCGTTGGTGGTGCACTCTGGTCCAGGTCGAAGAGAAGGCCACTGTCCAGC  
AGCACGGTGCTCAACAGCGGGCATGCACGCGCGGACAGTGCCGCGTCGCCTGGCGAG  
GTAACGATTAACGAGCGCGCCACGATCCGCGACCTAGACGACGAGGACGACGACGAC  
GACGACGACGATGACGACGACGACGACGATGACAACGACGACGACGACGAGGACGA  
GGACGGGAACAACACCGACGACGATCAACACAACAACAACAATAATGGGAATAACAG  
CAGCGGTGCCGAGGACACGTGCGATTCCGCTCGATATGGGTGGAACAATAACAACAAC  
AACAACCGTGACCGTGACCGCGACCGCGACGACAAGGACGACAAGGACGACGGGGA  
CGACGAAGACAAGAACAAGCTGAACAACCGGCATCATCGCCAACAGCAGCAGCAAC  
GCGGTGCTGCCCATCGGATCGACGAGGTTTCACCAGCTAAGCGTAACCTCTTGTCGTCT  
ATACCCGGTGGCGGTGCTGGCGGTGCTGGTTTGATCGGTGTTAAGCTCGACTTGCTCA  
CTAACCTAGCCACTAATCCGAGTAACGGCCAACTGCTGATTAACAACAACAACAACGG  
TCGGAAGATTATCCAAGAAGGTGTGGAAGAGAAGGAGGAAGACGTCGAGATCAAAGA

CGTCGAGGGCGGGAATCGTGCGAGGTAATACACGGGATCAACGAGGCCGCCATCTCT  
GTCGACGCGATTGCGTTCCTACGTGGTGGTCGTACCGGGGATCCAGAGTGTCTCGAAC  
ACGGTGAGGAGCAACGGACCGCGTCTACCTCGTACGATATCGATCAGACCGGGTTCTGT  
AGGCGGCATTACGCCGCCCATCTTGCAAAACGGCGTGGCGGGAAGACCGTCCGGTACT  
TATGGGGACGACCCATCCGTGCCTTCTACATCCAGGAGACCGGATGGTCACTTCGCGG  
GGACAAACACTGCCAGTAATCTGACTTCCTCGTCGCCCACCGCACCGTCCACGGCTCA  
CCAAAATCTCTATCGCGGGGTCGTTCGATCAGTTT

>novel\_circ\_001165

GAAGGGGTTTCTATAGAAGAAAGAAAGAGAGAAAAAGAGAGAGATTGTGAGACTGG  
TGAGACCCGGGTGCAATGTCGTATCACCGTGGGGGCCAGGCGGGCGCCGTAGCAGTTT  
CGTACAGCACCAAGTCCAATGGCACCGCATTCTCCTAGCAGACGATGTTCCAGCAATAA  
CAGCGGCAACAACAGTTCCGCTATTGGCACCTCCACCTCGAAGCTGAACACCTACAGA  
TCTACTGCTTCCTCGTCGATCTTAGATCGACCAACAAATTTCTACTCGACATCGTCGTCG  
ACGTCATCGTCGTCGGGCAGCTCGGGCTTTCGTTTGAAGTATACGACCGAGTACAGGC  
GATCCTACTGCCCATCAGGCAG

>novel\_circ\_001166

GTATTCGCATGTCTGTACCTCAGAATATTCTGACTCCTGGATGTACAATCAATGATGGTT  
TAATGCGCGGAAGAGGGCAGTGGAAGTATACCTCAACGTGGATTGATGCGTCGTCTATA  
CCATCTCGCGGTGGACAATTAGAAATTGCTGGAGTCGTGTTGGACAATGGGGTCCAA  
ATTATGGACAACCTGGTTCGTTTACCTCAACCTCTTCAGGGACATCCTCGTGGGCGGCTT  
CCACCTCAAGTAACTTCAATTGGTGGTCTTAAGTATGGTCTCCCTCGTGGTTTCACTCCT  
ATGGGTCGTCCACATTTCAAACGCGAGGAAATAATCGTGCGCAAATCGCAGGACGAG  
GAAAAAAGACACAAATGAAAGCAACTGGCAAAAAGAAACTACTGTTAAAAAGAGT  
AAAGAAAGTGAAAATAAGAAAGAAAGTAAAGAGGACGGGGTAGCAATATCGATGGAATA  
ACTGATTATAGTGATTCAATTCCAAATATAAATGCAACAAAAGACGCACTGCCAGTACC  
AGGCCAATTTGAGGATGCCATAGAAAACGGCAAAGGAATAGAAAAAGGACAAGGAGA  
CGCGTCACTGGTTGCTCCAGTCGCCGCAGAAAATTAG

>novel\_circ\_001168

GTGAATCGGCCGCTCACTATGAAGAAGGAGGGCATAACAGACGAGGAACAGGAAACTG  
TCGTGCAAGAGCAAGAAGAAGAAGGCTGGCGGTTGTCTGGGGCTTGGTGGCGTGATG  
GGTGATATGATCAAGGCCAGCGGCCACCTCGACCTCGACAACAAACCTTCCACTCGG  
GCTTCGGTTCACCCATGAGTACGTTCGCAGCATCATCACACGATGCATCCAGCGATGCAG  
CACTACATGTATCACACGGGGGTGGGGGTGGCGGGTGGGCTCCACCAGGGATTTCGCGC  
CCCCAGCGCCGCCACCGATCCACCCCCACTCGCACTCGCACTCCCATTCCCATCACATG  
ACGAGTCTTCAGGGTCTCCAGTTGGCAGCCACGACGAACGCGATG

>novel\_circ\_001169

AGGGCCGCGAATGCGTGAATTGCGGCGCGACATCGACGCCACTGTGGAGACGAGACG  
GTACCGGTCACTACCTCTGCAACGCTTGCGGCCTCTACTACAAGATGAACGGGCAGAA  
CCGACCTCTCATCAAGCCGAAACGACGGCTGTCGCTGCAGAGTGCGGCGAGGCGGGC  
GGGCACCAGCTGTGCCAACTGCAAGACCGCGACCACCACGCTCTGGCGAAGGAATCA

GGCCGGAGAGCCAGTCTGCAACGCGTGCGGCCTCTACTACAAGCTGCACAAC

>novel\_circ\_001170

AAGGCGGGGTCAAAGACAGACGCGATTATCCTTGGATCGTGAACGAACCGGTGAAGG  
GAATCACCTATGATCTCCCCTCGGAGGAGAGGCCTGACCAGGACCACCACCAGGCTTC  
CGGCAGAGGGGGCACCTCCGTTCTGCCACCGTTCTTAATCCCTCCCTCCCTCCCTCCCT  
CCCTCCCTTCCTCCCTCCCCCTTATTCTCCCCTGTTTCTCGCGGCGCCCCACCTCCTCC  
TCTCCTCCTCCTCCTCCTCCCGCTCCATCCTCCACCATCCGTCGCCCCGTGGACGTCGC  
TCCCCGGGACGGAGGAGCAGCGCACGCCGGAGGAGGTGATCGTCGACCCTCCCCCCC  
CCGTCGAGCATCCCGCCCGCGGGACAAAGGACGCGGCAAAGAGTTGAAGAGGAGA  
AGAAGAGGATGGACATGAGCAGCGAGTCGAGCGCGGCCAGGTGGTACGAGCCACCTA  
GGTCCACCCTGGAGCCGCCCTCGGGGGGTGCAGGAGTCGCGGGAGTCGTTGGAAATC  
CGACCGATTACAGGGGTACTACCCGCACGCGGGGGCCGACCGCCCATCACCCCGCAGC  
AGCGGCCGCTCACTATGCCACACAAGGATGTCGAGCAGCGGAGTGGCGAGCGGGCC  
CGTGAGCCAGGTGTGCCGGCCGCACTTCCACAGCTCGGTGCTGCACCCGTGGCTGTCG  
GGGAGCGGGGCGGACACGTCAAGACGCCGTGGGGATTCCCGACGACGACCGGCTC  
GGGCGGGAGCGGGGTGGCCGACGACAAGCCCCAGAGCCCCCTGGGATCCTCCCTGCC  
GCCGAGCACCGGCAGCCTCTCGAGCCACGGCGGGGCGGGGGCCGGCCACCACCTGTT  
CTCCTTCCCCCGACGCCCCCAAGGACGCCACCCCCGACAGCATCACCGCGAGCACC  
ACCTCGGCGGGCAACAACAACAGCGGCAACAGCAACAACAACAACAACAACAC  
GACCAGCGCCAACAACAACGCCAACAACCCCTGTCTGGGGCTCGGGGGTGGGGCGA  
GCAGCGAGTACCAGGCGGCGGTTGCCACGCGGCGGTGATGGGCGCGTTCATGCACC  
ACCAGGACGCGCTGGGCGGCGGGGGAGCGGGCTCGTGCGACGTGAAGCCGAGCGTG  
ATGCTGGCCCATCACACGGCGCGCCGTCGCCGCCCATCAGCAGCACAAACGGGACG  
GCGAGCGGCGGGAACGGAGGGACAGGGGCGAGTGGAGGCGGCGGGGCGAGCGGGC  
AGGTGAAGCAGCGCGAAGGTAATAATCAGTCGGGCAGCCAACAGGCGAGCACCGCGC  
AACAGCAGCAGCAGCAGCAGCAGCAGCAGCAGCAACAGCAGCAGCAGCAGCAGCAG  
CAGCAGGAGGCGGCCGCGTATCAGGGGAGCAACGTGGGCGGCGGGGGTGGCGGCGG  
CGGCGGCGGGGGGGCGAGTTCGCCCTCGTGCAAGGAGAGTTACGCGGCTGCGGCCGC  
CGCCGCCGCCGCCGCCGCCGCCGCCGCCGCTGCCTCCAACACCCACCACGCGAC  
CTCCGGATCCCAGTACGACCCGGCAACCAGCGCGTATAACATGTACCAGCACCTGCAG  
TATCCTAGTACCACCCACCACCACCACCATCACCATCATCACGCCGCCTCCTCGTCGTC  
TTCTTCGTCTTCGTCCCACAATCCGCACAACGGGGCCCGCCGCGGTCTCCGGTATTTTCG  
GCCACCACGCGGCGGCGGCCGCCGCCGCCGCCGCTGCAGCCGGGGCCGGGAACGCG  
GCCGGCGTGCCGCGGTGAACGTCGACTCGAAGCTGTTGGTTCGGCCACGTGCACGCC  
AACACGCCGAGCTCGCCTTCCGCGCAGCAGCAGCAGCAGCAAAAGCCAGGAACAA  
GTCGAGAACGTCCGCCGAGGGCCGCGAATGCGTGAATTGCGGCGCGACATCGACGCC  
ACTGTGGAGACGAGACGGTACCGGTCACTACCTCTGCAACGCTTGCGGCCTCTACTAC  
AAGATGAACGGGCAGAACCGACCTCTCATCAAGCCGAAACGACGGCTGTCGCTGCAG  
AGTGCGGCGAGGCGGGCGGGCACCACTGTGCCAACTGCAAGACCGCGACCAACAC  
GCTCTGGCGAAGGAATCAGGCCGGAGAGCCAGTCTGCAACGCGTGCGGCCTCTACTA  
CAAGCTGCACAAC

>novel\_circ\_001171

CAAGGATGTCGAGCAGCGGAGTGGCGAGCGGGCCCGTGAGCCAGGTGTGCCGGCCGC  
ACTTCCACAGCTCGGTGCTGCACCCGTGGCTGTCGGGGAGCGGGGCGGACACGTCGA  
AGACGCCGTGGGGATTCCCCGACGACGACCGGCTCGGGCGGGAGCGGGGTGGCCGAC  
GACAAGCCCCAGAGCCCCCTGGGATCCTCCCTGCCGCCGAGCACCAGGACGCCTCTCG  
AGCCACGGCGGGGCGGGGGCCGGCCACCACCTGTTCTCCTTCCCCCGACGCCCCC  
AAGGACGCCACCCCCGACAGCATCACCGCGAGCACCACCTCGGCGGGCAACAACAAC  
AGCGGCAACAGCAACAACAACAACAACAACAACACGACCAGCGCCAACAACAACGC  
CAACAACCCCTGTCTGGGGCTCGGGGGTGGGGCGAGCAGCGAGTACCAGGCGGCGGT  
TGCCACGCGGCGGTGATGGGCGCGTTCATGCACCACCAGGACGCGCTGGGCGGCGG  
GGGAGCGGGCTCGTGCGACGTGAAGCCGAGCGTGATGCTGGCCCATCACACGGCGC  
GCCGTGCCGCCCCATCAGCAGCACAACGGGACGGCGAGCGGCGGGAACGGAGGGA  
CAGGGGCGAGTGGAGGCGGCGGGGCGAGCGGGCAGGTGAAGCAGCGCGAAGGTAAT  
AATCAGTCGGGCAGCCAACAGGCGAGCACCAGCGCAACAGCAGCAGCAGCAGCAGCA  
GCAGCAGCAGCAACAGCAGCAGCAGCAGCAGCAGCAGCAGGAGGCGGCCGCGTATC  
AGGGGAGCAACGTGGGCGGCGGGGGTGGCGGCGGCGGCGGCGGGGGGCGAGTTCG  
CCCTCGTGACGGGAGAGTTACGCGGTGCGGCCGCCGCCGCCGCCGCCGCCGCCGCC  
GCGGCCGCGGTGCCTCCAACACCCACCACGCGACCTCCGGATCCCAGTACGACCCG  
GCAACCAGCGCGTATAACATGTACCAGCACCTGCAGTATCCTAGTACCACCCACCACCA  
CCACCATCACCATCATCACGCCGCTCCTCGTCGTCTTCTTCGTCTTCGTCCCACAATCC  
GCACAACGGGGCCGCCGCGGTCTCCGGTATTTTCGGCCACCACGCGGCGGCGGCCGC  
GGCCGCCGCCGCTGCAGCCGGGGCCGGGAACGCGGCCGCGGTGGCCGGCGTGAACG  
TCGACTCGAAGCTGTTGGTCGGCCACGTGCACGCCAACACGCCGAGCTCGCCTTCCGC  
GCAGCAGCAGCAGCAGCAAAAGCCCAGGAACAAGTCGAGAACGTCCGCCG

>novel\_circ\_001173

GCGGTGACAAGCGTCGCGCGGGGGAAGGAGAATGGAGGCGGCGGGGGAGGCTGGCG  
ATGACAAGAGCCCCTCGAAGACTGAGCCGGATGACCAGGGATCGAGGCAACTTAGCG  
TGGACCAACTGCGCACTCTCTCGATCGACAAGGTTACGGTGGAGAAGATCGTGTTGGA  
ATCGTCGGCGGGCTCGCGAGAGGTGCTGTTGACGAAAAATGAGAGTTCGAGGCGAGT  
TTCGATAAAATCCGAGGTGGAAGCCGGCGAGCGGCGACAATTATCGCTCCTCCCTT  
CCCGACGACATTAAAGCGTTTCGACGGGCGTCGGTTCGAAGAAACCGGAGAGGATCAA  
CCGATCAGACTGACCAAGAGCCCGTCCATAGGCAGCTTGGCGGTTCGCGACAGGCGTC  
CCTGTGGACGAGGCCAAGGGAGAGGACAAAGAGAATCTGTTGATCACCGAGGAGGA  
GGACAAAGAGAATCTGTTGATCGCCAAGGAGGAGAAGGTGAACGCGAGAAATCTGTT  
GGAGAGGAGCCAGACGAACATCGAGGTGCTGCAGCGGAACCTGAACACCAGGATCG  
GCGCGAGCACCGCCCAAAGGTACAAGAAAAAGTTGCTCGAGTCCCGGGAGAATCGGC  
GTCCAAAGTTTCGCGGGGAGGATCGCGTTCGACGAGGAGTTCCTTCAGAAGCACAATC  
TCGACAAGAGATTGAAGATCGAGGAGTACGGGTTGCCGACCTTCTCCGCAACCGG  
AAGAAGAGGAGGAGGAGGGTAGTTTCGAAGGCAGGGTACAGCGAGAAGGTGTTGGAG  
GTGGAGAAAAGGTGGTCAGGGGAGTTTCTGAAGAATCAATTGGACCGCCGCTCCTCG  
GAGTCGTCCAAGTCCTCTTACGTGGGGGAATACGGGAGCGTTTCCTCGAGGGAGAGCA  
TAGCCGAGGACTACGATCCTAGAGCAGCCTCCTCCGCCGTTCTTTTCCAAGCTGGAAA  
AGAAAAGTTCGAGGCGGGGCGGCCGATTAGTTTGAAGTGCAGCGAAAACCTCTGGCCGC  
GAGCACGTTGAGCACGCTCGACTCCGACTCGTGCCTCGAGGACAGGATCAAGTCGCT



GGAGGAGGACATCGAGGAGGATGGGGACTCGGTCTGCTCGTCGACGGATAGGGAGATC  
GTCCGATCCTTGGAGGGAGTCCATGCTCCCGTTCGAGTTTTGGAATCGAAAGGAGACT  
ACGGAGTCGAGGATCGACGAGACTCGAAATTCGAGAGTCGCTTCATTGGAGTCGACG  
AGGGTGGACGGGTACGCGAGCCTGATAAGGAAGTTCACGATGGAGGCGGGCTCGTCG  
CGGTCTGAGGAAGGAGGAGAAGCAGAAGAGGAAGCTCGGTTTCCGCCGCCTTCTGCCC  
GGCTTCTTCTCGCCCAAGGACTCGCGAAAGGATTACAAGAAGAAGGAGGGGAAGGAG  
AGGAAGAGGGCGGGCGACGACAGGCACTTCGCCCCGCTACCAGCAGAACGGGAACCTA  
CGCCAGGTCTGGCGGACACGATGAACCTGAACGAGGACATCAAGAGGAACGTGAAGCT  
GGACAACAGCCTGAACGGGTCCATGATCGAGGAGAGGCTGGACGAGATCAAGCGGGA  
GCTGTTCCCGCTCGATCAGGGCCCCATCACGAGCACCCCCGACCACCTGGCGCGCGAG  
GACCAAGGAGGTGGCGGCCAGCTGCCCCCCGCTCCTACACCACCGACTCGAGCCTC  
AGCTCGATCGCGCCCGACGAACGGTGGGCGGGCGAGAGGAGCGGCCAGCTCCTCGGC  
GTGTCGCCCCGACGCGAGGAAGTTCGAGCAGAGGCAGAGGCAACGTTACGGCCAACCG  
TTGGAACGGAAGCACAGTTTGCAGGAGCCGAACCACTGCGCCCCCAGGCAGCAGCCG  
GCCTTCTTCCAGAGGAACCACGGCCCCGTCGGGGAGGATCTCCGCGCCGCCGGCCGAG  
AGGTACCTGGCCAGGCCGAGGCCGGTTCGACCGCCCCCTCCCAGCCATACCCGCTCCA  
GGCTCGACCTCTTGTCCAACCTACGAGAATTACCTGGAGGCGGGCGAGCAGGCGTTGTA  
CGAGAACGAGAACC CGCCGCCGGGCTTGATCCTGAAGTCGGTCTCGGCCAGGTCAA  
GATCACCAGGCAGCCGATAGTGAATCAGAACCAGCGCGCCCCGTTGCTGGGCAGGTC  
GCCCAAGTACCTGTCTCGGGCTCGAGCCAGAAGTCGGGGGACTACGGGGGCGAGTC  
GAGTTGCACACCGAACTCGAGCCAGAAGAGCGAGTTCTCGCCGACCAGCTCCAAGAG  
CGGCGAGTATTACCTGCACTCGCCCCGCGACACCGGCTCCCCGAACGAGGAGGACTCT  
CGAAGGGACGAGGGCATCTACGAGAACGAGAAATCACCGGACGAGCGAATCTACGAC  
GAGACGCCCTGCGAGGAAGCCGACTCGAACCTCGTCGAGGACAAGAGAGGGTCTCCT  
CGTAGGAGTCGCTCGAGAGGCGGCGAACGAGCCGCTTCCCCGGCGAGGGGAAGCGC  
GGAGAAGCTGTGCGGGGAGCAGGGAAAAGCGATCTCGCCGCTGGGACCGAGGCGGC  
CGCCCTCGGCCAGAAGGGGCGCAGCCCAACGAGCAGATCCTTATAGCGTCCCCGAAGA  
GGGACGTGCCGTACGAGACGCGAATACCGAGGCCGTGCAACGAGTCGAGGCGCTGCC  
TCGTCGAGTCGCCGGTGACATGACGAACGCGCCTCGAAAACCTCGTGGTCGACCCGC  
GGGGCCAAGATTCGAGCGACGCCTCGAAGGCTCAGGTTAGCTTGGAGATACCGCGTCC  
AGAGCCTGTTTACGCGCGCCAGCGGAACCCTGAACCAGCTTCTTCGCCCGAGAAAAA  
GACGAGCAGTCAAGAGAGAAAGGAGGGGGAGGAGAGGGTGGCTTGGGTCCAGGCGT  
CGTCCTCGCCGCAAATCGGCGAGACTGGCTCGAAAAGGTCGACAGGTGATCGAGG  
ATCATCGTCAGAATTCTATCCCAGCTATGGAACCTCAGCCACTTCAACGTAATCCTAATT  
TAGAGGAGCAACGGGTCTCCAATCAGCTCGACTCGAGGCAGAGAAGTTTGGAAGATG  
GCGCACAGTACAACCAGAGGACCTACGAAGCGACGCAGCGGATGGGTCCGTTGTCGC  
CCTCGAAGCAGGAGACTCGACAGCACCTGGAAGCGTTCTACTGGCAGCAGAAGGCGC  
TCGAGGCGCACCGGAAGTCGCTCGCGTCCCCGGCGAGCGAGAAGCAGATTGGGCGAA  
AGATCGACTTGCCGGAGGTGAGGGAGGCGGTGTACTGGCAGCAGCTCAAGAAGCTGG  
ACGAGGAGCAGCAGAGGCGCATCTACGAGCAGAATCCGATGGACGAGTCGTCTACT  
GCAAGGCGAAGAGAGTATCCGCGCCGAGGCAGCAGGGACCTCCTGTTTCGAGTGGCGG  
CGACCGGTGGTCTTCTCTGCCTGTCATCGCCCATCATGGAAACCCATCCTCGTGACC  
TGTGGCAACGCGAAGCCGAGCCCCGGCGGGAAACCGCCGCTGATGCAGAGCCAGAA  
GGGCCAGAACCAGCCGGTGCTGATCGTCCGCCCGCAGCAGGCGATCCGCGATCCGCG

GGTGGACGCCAAGCCGCTCGACTCGGTGCAGAGATCGAAGAGCGCGTCACCGCATTT  
TCACAGGGGAGACGTTTCCTCAGGCGCGGAAGCTCGAGCTTTCCTCCTCGATCTACGAG  
GAGGAGCCGACCAACGACGTCGAGGGGAAAGCAGTTGCTCACCTCCTCCTCCTCCT  
CCGATATTCAAAAGGGGTAGCTTGATCGGGGGAGAGTCGGTGGAGTACGGAAGCGGG  
AGCGGCGCGAAGAGGGTGAGCTTCTCGAATCAGTCGGGCGTGGGCGGGCAGGAGCTG  
GCCAGCGGAAGTTGGCCACGAAACACGGCACTGCCCCGGAACCGCCGACTCGAAG  
GCATCGAAGCGAGGACAGCGTGTCCGACACGGACTCGGTGTTCTCGTACCCGGACCG  
CCTTCGTGATCCTTCCTGCGAGTACGATGCCGACAGGCCTCTTCCGCCTCTGCCAAGG  
ACGCGACGAGAAGAGGCGTCGCGTACAACGGGGACACGACGCGTTGCAACGTCGGA  
GTGGATCCTAGACGCGGCGTCAGCCCGCAGCGAGTACTTCGACAGAAGG

>novel\_circ\_001174

AGGAAGAGTGGAATTCGGATGGCAAGGGTCGACAGTCCAACGACATCGGTGGGTCCG  
GCAGGGGGGAGGGTGAGGCAGGCTCGAACGAGGTTCCAAGTGGGAGGAGAGGCGGC  
GGTGGCGGCGGCGTGGGTAGCGGAGTCGGCGGGGGCGGGGGCGGAGGAGGAAGCGT  
GCTGGGGGTTGGCGGAGGTGGCGGAAGCGGAAGCATCGGGGGCGGCTCGGGGGGCA  
GAAGCGGATCAGGGGGAGGCCGATCGAGGGACGAGCCGAGGAGGCACACCCTCGGC  
GGCGATACCAACCGTCCCTACATCATCAGCAGTTCAACGCGGCCAGCAGCTACACC  
CCCTTCATCCCCATCATCTGCCGCCGCCACACGGCCAATACGGTACGCCGCCACGCGT  
CATACCACCATGGATCTCGAGATGGGGACCAAGTCTCGCCAGAGAAAGTCGCCTCTTC  
CGCGCGGGTACCCACCTCCCTCTACGACGATGTTGTTTCGATGACGACCCGGGCATCATG  
TCCGAGGTGGAGACATCGAGCACCGGATTTTCGACGGGGTGGCAAGCAAAGAAGCAGC  
CTCCCCGTCGTACGGACCCCCAGCAAACTCTGGAGCGACCACTAGGTCTAGTGTTCC  
TGCAGTATAGGAACGAGACGAAGCGGGCGCTCCTACCGAACGAAATCACTAGCATAGA  
CACCGTTAAGGCTCTCTTCGTACGAAGCTTTCCCAAGCAACTCACTATGGAATATCTAG  
ACAGCCCCACGTCAAGGTTTACATACGATAGCAACAAGGATATGTTCTACGAACTC  
GAAGATCTCAGATCGCATCTGAGAGACATCCGAGACCGAAGCGTCTTGCGACTATTTCG  
AGAGCACTGACGGTGTGACAGGGATGCCAGGGCCATTGGGGATACCAGGGACAGGAA  
CGGGGCTACCACCTCACTGGGAGGACCAGAGCTACTTCAGCGAGCCGGAATTCGACA  
CGCAATACCAACATCAGCATATCCACAAGAGCAAG

>novel\_circ\_001175

GTGGGTCCGGCAGGGGGGAGGGTGAGGCAGGCTCGAACGAGGTTCCAAGTGGGAGG  
AGAGGCGGCGGTGGCGGCGGCGTGGGTAGCGGAGTCGGCGGGGGCGGGGGCGGAGG  
AGGAAGCGTGCTGGGGGTTGGCGGAGGTGGCGGAAGCGGAAGCATCGGGGGCGGCT  
CGGGGGGCGAGAAGCGGATCAGGGGGAGGCCGATCGAGGGACGAGCCGAGGAGGCAC  
ACCCTCGGCGGCGATACCAACCGTCCCTACATCATCAGCAGTTCAACGCGGCCAGC  
AGCTACACCCCCTTCATCCCCATCATCTGCCGCCGCCACACGGCCAATACGGTACGCCG  
CCCACGCGTCATACCACCATGGATCTCGAGATGGGGACCAAGTCTCGCCAGAGAAAGT  
CGCCTCTTCCGCGCGGGTACCCACCTCCCTCTACGACGATGTTGTTTCGATGACGACCCG  
GGCATCATGTCCGAGGTGGAGACATCGAGCACCGGATTTTCGACGGGGTGGCAAGCAA  
AGAAGCAGCCTCCCCGTCGTACGGACCCCCAGCAAACTCTGGAGCGACCACTAGGT  
CTAGTGTTCTGCAGTATAGGAACGAGACGAAGCGGGCGCTCCTACCGAACGAAATCA  
CTAGCATAGACACCGTTAAGGCTCTCTTCGTACGAAGCTTTCCCAAGCAACTCACTATG

GAATATCTAGACAGCCCCACGTCAAGGTTTACATACACGATAGCAACAAGGATATGTT  
CTACGAACTCGAAGATCTCAGATCGCATCTGAGAGACATCCGAGACCGAAGCGTCTTG  
CGACTATTCGAGAGCACTGACGGTGTGACAGGGATGCCAGGGGCCATTGGGGATACCAG  
GGACAGGAACGGGGCTACCACCTCACTGGGAGGACCAGAGCTACTTCAGCGAGCCGG  
AATTCGACAGCGAATACCAACATCAGCATATCCACAAGAGCAAG

>novel\_circ\_001176

GTGGGTCCGGCAGGGGGGAGGGTGAGGCAGGCTCGAACGAGGTTCCAACCTGGGAGG  
AGAGGCGGCGGTGGCGGCGGCGTGGGTAGCGGAGTCGGCGGGGGCGGGGGCGGAGG  
AGGAAGCGTGCTGGGGGTTGGCGGAGGTGGCGGAAGCGGAAGCATCGGGGGCGGCT  
CGGGGGGCAGAAGCGGATCAGGGGGAGGCCGATCGAGGGACGAGCCGAGGAGGCAC  
ACCCTCGGCGGCGATCACCAACCGTCCCTACATCATCAGCAGTTCAACGCGGCCCAGC  
AGCTACACCCCCTTCATCCCCATCATCTGCCGCCGCCACACGGCCAATACGGTACGCCG  
CCCACGCGTCATACCACCATGGATCTCGAGATGGGGACCAAGTCTCGCCAGAGAAAGT  
CGCCTCTTCCGCGCGGGTACCCACCTCCCTCTACGACGATGTTGTTTCGATGACGACCCG  
GGCATCATGTCCGAGGTGGAGACATCGAGCACCGGATTTTCGACGGGGTGGCAAGCAA  
AGAAGCAGCCTCCCCGTCGTACGGACCCCCAGCAAACTCTGGAGCGACCACTAGGT  
CTAGTGTTCTGCAGTATAGGAACGAGACGAAGCGGGCGCTCCTACCGAACGAAATCA  
CTAGCATAGACACCGTTAAGGCTCTCTTCGTACGAAGCTTTCCCAAGCAACTCACTATG  
GAATATCTAGACAGCCCCACGTCAAGGTTTACATACACGATAGCAACAAGGATATGTT  
CTACGAACTCGAAGATCTCAGATCGCATCTGAGAGACATCCGAGACCGAAGCGTCTTG  
CGACTATTCGAGAGCACTGACGGTGTGACAGGGATGCCAGGGGCCATTGGGGATACCAG  
GGACAGGAACGGGGCTACCACCTCACTGGGAGGACCAGAGCTACTTCAGCGAGCCGG  
AATTCGACAGCGAATACCAACATCAGCATATCCACAAGAGCAAGACGGCGAAGAACTC  
GACTTCCGGGAATAGCGGATACTATGTTCGGAGGAAGCAGCACTCTGCCACGAGGAGG  
ACAATAATGAGGGCGTACAGTCCGGCGGCGTCGTCTGTGGTCGGAGGACCAAACGC  
GACGCCGACACAACCGAAACCTCTCGCCACTCCAG

>novel\_circ\_001177

GTGGGTCCGGCAGGGGGGAGGGTGAGGCAGGCTCGAACGAGGTTCCAACCTGGGAGG  
AGAGGCGGCGGTGGCGGCGGCGTGGGTAGCGGAGTCGGCGGGGGCGGGGGCGGAGG  
AGGAAGCGTGCTGGGGGTTGGCGGAGGTGGCGGAAGCGGAAGCATCGGGGGCGGCT  
CGGGGGGCAGAAGCGGATCAGGGGGAGGCCGATCGAGGGACGAGCCGAGGAGGCAC  
ACCCTCGGCGGCGATCACCAACCGTCCCTACATCATCAGCAGTTCAACGCGGCCCAGC  
AGCTACACCCCCTTCATCCCCATCATCTGCCGCCGCCACACGGCCAATACGGTACGCCG  
CCCACGCGTCATACCACCATGGATCTCGAGATGGGGACCAAGTCTCGCCAGAGAAAGT  
CGCCTCTTCCGCGCGGGTACCCACCTCCCTCTACGACGATGTTGTTTCGATGACGACCCG  
GGCATCATGTCCGAGGTGGAGACATCGAGCACCGGATTTTCGACGGGGTGGCAAGCAA  
AGAAGCAGCCTCCCCGTCGTACGGACCCCCAGCAAACTCTGGAGCGACCACTAGGT  
CTAGTGTTCTGCAGTATAGGAACGAGACGAAGCGGGCGCTCCTACCGAACGAAATCA  
CTAGCATAGACACCGTTAAGGCTCTCTTCGTACGAAGCTTTCCCAAGCAACTCACTATG  
GAATATCTAGACAGCCCCACGTCAAGGTTTACATACACGATAGCAACAAGGATATGTT  
CTACGAACTCGAAGATCTCAGATCGCATCTGAGAGACATCCGAGACCGAAGCGTCTTG  
CGACTATTCGAGAGCACTGACGGTGTGACAGGGATGCCAGGGGCCATTGGGGATACCAG

GGACAGGAACGGGGCTACCACCTCACTGGGAGGACCAGAGCTACTTCAGCGAGCCGG  
AATTCGACAGCGAATACCAACATCAGCATATCCACAAGAGCAAGACGGCGAAGAACTC  
GACTTCCGGGAATAGCGGATACTATGTTCGGAGGAAGCAGCACTCTGCCACGAGGAGG  
ACAATAATGAGGGCGTACAGTCCGGCGGCGTCGTCTGTGGTCGGAGGACCAAACGC  
GACGCCGACACAACCGAAACCTCTCGCCACTCCAGATGGTTGGATAGGTGGTGGCGG  
GGTGCCGCCGGCCAAGCCGCTTCGCAGCTACCAGTGTGGTAAGAGTCCCCTTGGAAG  
CCTGGGGGGGCTCGGCTCGCTTCTCTAGAGACAGCTCGGTCTCCCTCTATAGTATAGCAG  
ATCGATTGCATGGGGAAAGCGGTTATATGAGCAGTCCCGAAAGAGGTGGAGGAGTTGG  
TTCTGGAACGGGAAGATACCCACCCGGCCCCTACAGCGCAGGAAGCAGCTACGAGGA  
TCCGTAATAATTCGCAATATTCGGGCACTGTGACACCTGTCATTGACGAGGAAGCCAG

>novel\_circ\_001178

GTGGGTCCGGCAGGGGGGAGGGTGAGGCAGGCTCGAACGAGGTTCCAACTGGGAGG  
AGAGGCGGCGGTGGCGGCGGCGTGGGTAGCGGAGTCGGCGGGGGCGGGGGCGGAGG  
AGGAAGCGTGCTGGGGGTTGGCGGAGGTGGCGGAAGCGGAAGCATCGGGGGCGGCT  
CGGGGGGCAGAAGCGGATCAGGGGGAGGCCGATCGAGGGACGAGCCGAGGAGGCAC  
ACCCTCGGCGGCGATACCAACCGTCCCTACATCATCAGCAGTTCAACGCGGCCCCAGC  
AGCTACACCCCCTTCATCCCCATCATCTGCCGCCGCCACACGGCCAATACGGTACGCCG  
CCCACGCGTCATACCACCATGGATCTCGAGATGGGGACCAAGTCTCGCCAGAGAAAGT  
CGCCTCTTCCGCGCGGGTACCCACCTCCCTCTACGACGATGTTGTTTCGATGACGACCCG  
GGCATCATGTCCGAGGTGGAGACATCGAGCACCGGATTTTCGACGGGGTGGCAAGCAA  
AGAAGCAGCCTCCCCGTCGTACGGACCCCCAGCAAACTCTGGAGCGACCACTAGGT  
CTAGTGTTCTGCAGTATAGGAACGAGACGAAGCGGGCGCTCCTACCGAACGAAATCA  
CTAGCATAGACACCGTTAAGGCTCTCTTCGTACGAAGCTTTCCCAAGCAACTCACTATG  
GAATATCTAGACAGCCCCACGTCAAGGTTTACATACACGATAGCAACAAGGATATGTT  
CTACGAATCTGAAGATCTCAGATCGCATCTGAGAGACATCCGAGACCGAAGCGTCTTG  
CGACTATTCGAGAGCACTGACGGTGTGACAGGGATGCCAGGGGCCATTGGGGATACCAG  
GGACAGGAACGGGGCTACCACCTCACTGGGAGGACCAGAGCTACTTCAGCGAGCCGG  
AATTCGACAGCGAATACCAACATCAGCATATCCACAAGAGCAAGACGGCGAAGAACTC  
GACTTCCGGGAATAGCGGATACTATGTTCGGAGGAAGCAGCACTCTGCCACGAGGAGG  
ACAATAATGAGGGCGTACAGTCCGGCGGCGTCGTCTGTGGTCGGAGGACCAAACGC  
GACGCCGACACAACCGAAACCTCTCGCCACTCCAGATGGTTGGATAGGTGGTGGCGG  
GGTGCCGCCGGCCAAGCCGCTTCGCAGCTACCAGTGTGGTAAGAGTCCCCTTGGAAG  
CCTGGGGGGGCTCGGCTCGCTTCTCTAGAGACAGCTCGGTCTCCCTCTATAGTATAGCAG  
ATCGATTGCATGGGGAAAGCGGTTATATGAGCAGTCCCGAAAGAGGTGGAGGAGTTGG  
TTCTGGAACGGGAAGATACCCACCCGGCCCCTACAGCGCAGGAAGCAGCTACGAGGA  
TCCGTAATAATTCGCAATATTCGGGCACTGTGACACCTGTCATTGACGAGGAAGCCAGTG  
GGTGGTGCAGCGATACGGAGCTGTTGGAGGAATCGTACAGCCTTTACGGTGTGAAACC  
GCCAGGCCGTCCACCGTCCGGTCCTCCGCGATCTCCGTTTCCCCCAGGGGCACCACCA  
CCTTTGCCACCTGGTAGTCAGAGCTACGACGCTACTCGGATAAGGGTAGAGCACATGG  
AGAGACAGTTGGCCAACCTGACAGGACTAGTGCAGAAAGCTCTACCCATGCACCGC  
ACACGAGCCCATCACCACGTGATTACTTGCAAGTTCCCGCGGGACGTGATCCTTACGC  
GAGAGGGCCAGGCGCCGGGGACGAGTTCGACAAACATTCTAGCTCCAGCTCTGCCTC  
ATTGCCAGTGTCTCAACCTGCCGTTACAGATGACTCGTACTTAAGGACTGACGTAAAA

CCACCAAAGTTAGGCAAAGACAAGTCGGTGTCGTTTGAAAAATCAGTGTCTTCAGTG  
ATGAGCCTCCAGACATGAATTCTCCCAAGCAACATTCCCCGCAGCACGCAGCGGACAC  
AAAACCAACGAAACCGGCGATCAAATCCTCCACGTTGCCGAGGATGTCTTCGCAAGA  
GAGAGACAGGCATAAACCTACCCCGCCGCCGAAACCGGCCGCGCTGGTTGCCGGCCA  
ATACGTATATCGGGACATGGCTTTGACACCGGAAATGTACAATCAGCTGAGAGGCTTGC  
AGAAAAAGGCCAAGGATCTGAGGCAAGAAGTTAGGAACTTGAGGCGCATGTCTCAGG  
CTCAGGCGCACACCATAACGGGAGACCATTTTGGATACGTTTCATTACCATCAGGACAATG  
TTGCTGTCGTGCGGCGACGCAGCCTGGGACGCGGAGAAGATTCGACTAAGCCGCGAG  
GAGGACCTCTACAGGCAGGAGATGTTGAGGCTGGTAAAAGATCTAACCGAGCTGGAA  
AACACGGTGGAGGAACTACGTGGCAATGTCATAAATAGAAAGACTAGAGTGAACATGT  
CGGATGTGGAGAACATGGCCTTGATAATGAGCAAATCTAGCAAAACGGTAGCGGATCT  
AAAGGTGCGATTCCCAAGTTTACAAGAGGGTATGAAAGGTCTGTTGAGTTCTGAAATG  
GAGATGGTTGTGCGAGCGGAAAAGTTCCTCAAGGAAGAGCCAGAACGATTGGAGTCG  
GCGTTGAAACGTTGCAAAAAGCTCACAAGTACCCTCGTGACGCTCAAACGTTTGGCGT  
CGGTGCAAGAGCAGCGATTACCAAACGCAGCAGCGAGCATAGACGCCGAAGAGACGC  
CACCAATAACACCAACCTCTGCTCAACATTCCAAG

>novel\_circ\_001179

TCGCCTCTTCCGCGCGGGTACCCACCTCCCTCTACGACGATGTTGTTGATGACGACCC  
GGGCATCATGTCCGAGGTGGAGACATCGAGCACCGGATTTTCGACGGGGTGGCAAGCA  
AAGAAGCAGCCTCCCCGTCGTACGGACCCCCAGCAAACTCTGGAGCGACCACTAGG  
TCTAGTGTTCTTGCAGTATAGGAACGAGACGAAGCGGGCGCTCCTACCGAACGAAATC  
ACTAGCATAGACACCGTTAAGGCTCTCTTCGTACGAAGCTTTCCCAAGCAACTCACTAT  
GGAATATCTAGACAGCCCCACGTCAAGGTTTACATACACGATAGCAACAAGGATATGT  
TCTACGAACTCGAAGATCTCAGATCGCATCTGAGAGACATCCGAGACCGAAGCGTCTT  
GCGACTATTCGAGAGCACTGACGGTGTGACAGGGATGCCAGGGCCATTGGGGATACCA  
GGGACAGGAACGGGGCTACCACCTCACTGGGAGGACCAGAGCTACTTCAGCGAGCCG  
GAATTTCGACAGCGAATACCAACATCAGCATATCCACAAGAGCAAGACGGCGAAGAAC  
TCGACTTCCGGGAATAGCGGATACTATGTGCGAGGAAGCAGCACTCTGCCACGAGGAG  
GACAACTAATGAGGGCGTACAGTCCGGCGGGCGTCTGTGGTTCGGAGGACCAAACG  
CGACGCCGACACAACCGAAACCTCTCGCCACTCCAG

>novel\_circ\_001180

ATCGATTGCATGGGGAAAGCGGTTATATGAGCAGTCCCGAAAGAGGTGGAGGAGTTGG  
TTCTGGAACGGGAAGATACCCACCCGGCCCCCTACAGCGCAGGAAGCAGCTACGAGGA  
TCCGTACTATTCGCAATATTCGGGCACTGTGACACCTGTCATTGACGAGGAAGCCAGTG  
GGTGGTGCAGCGATACGGAGCTGTTGGAGGAATCGTACAGCCTTTACGGTGTGAAACC  
GCCAGGCCGTCCACCGTCCGGTCCTCCGCGATCTCCGTTTCCCCCAGGGGCACCACCA  
CCTTTGCCACCTGGTAGTCAGAGCTACGACGCTACTCGGATAAGGGTAGAGCACATGG  
AGAGACAGTTGGCCAACCTGACAGGACTAGTGCAGAAAGCTCTCACCCATGCACCGC  
ACACGAGCCCATCACCACGTGATTACTTGCAAGTTCCCGCGGGACGTGATCCTTACGC  
GAGAGGGCCAG

>novel\_circ\_001181

AGAGAGACAGGCATAAACCTACCCCGCCGCCGAAACCGGCCGCGCTGGTTGCCGGCC  
AATACGTATATCGGGACATGGCTTTGACACCGGAAATGTACAATCAGCTGAGAGGCTTG  
CAGAAAAAGGCCAAGGATCTGAGGCAAGAAGTTAGGAACTTGAGGCGCATGTCTCAG  
GCTCAGGCGCACACCATACGGGAGACCATTTTGGATACGTTCAATACCATCAGGACAAT  
GTTGCTGTCGTGCGGCGACGCAGCCTGGGACGCGGAGAAGATTGACTAAGCCGCGA  
GGAGGACCTCTACAGGCAGGAGATGTTGAGGCTGGTAAAAGATCTAACCGAGCTGGA  
AAACACGGTGGAGGAACTACGTGGCAATGTCATAAATAGAAAGACTAGAGTGAACAT  
GTCGGATGTGGAGAACATGGCCTTGATAATGAGCAAATCTAGCAAAACGGTAGCGGAT  
CTAAAGGTGCGATTCCCAAGTTTACAAGAGGGTATGAAAGGTCTGTTGAGTTCTGAAA  
TGGAGATGGTTGTGCGAGCGGAAAAGTTTCTCAAGGAAGAGCCAGAACGATTGGAGT  
CGGCGTTGAAACGTTGCAAAAAGCTCACAAGTACCCTCGTGACGCTCAAACGTTTGG  
CGTCGGTGCAAGAGCAGCGATTACCAAACGCAGCAGCGAGCATAGACGCCGAAGAGA  
CGCCACCAATAACCAACCTCTGCTCAACATTCCAAG

>novel\_circ\_001184

AGATGAATGGTACCAGACTTGGTAGGGGTCGAGGTGGCCGCCTTGCCGTGTACGTGGG  
TTGCGGGATGGTGGTCATACTCCTGGTGTTCCTCTACCGCGCCGCCACCTCAGAAATGG  
CCAGGCTTCAAGAGCTCAACGTCCAATGTTCTCATCAACAGGAGGCTCTTGCCGCTCA  
ACTTCAAGTGATATTCGAATACAAAGTGAGGTTAGAAAAATCGTTGGCCGAGGAAAAG  
AGTTCGAACGCGGCTGTGAAACAGGAGCTTCAGCAACGAGCGTCCAGAGAGAAATCC  
CTCAGGGATAAGGACAGTATAGAGGCGATGCAGAGATTCAACTCTTTGCAACAAACGT  
ACAAGTTGCTGCAGACAGAGCATCAGGATTTGAAGGAGGAATGCAAGAAACGGGACC  
AGCAAGCTTTAGAGGACACTAGTAAATTGGAGACAACATTGAGAGAGCTTCGTAGCCG  
GATTAGGCAGGCTAGGGAGGACAAGGAGAAGGCTTTGGAACATTTGAAGACCAAGTT  
CCTCGAGTTGGACACGCAGAAAAACGAATTGGAACAAAAGTACAATGACATGTTGAA  
AAATAACGAGGACACGGATAGCACGATTGAACATTTGAGGAAGGAGGTGATTCAATTG  
AAGCGCGAGCTGGACGAAGCTAAAAAATTATCACGCAAAGTTACTTCTCTTGATCAA  
GCGTATCGAATCCGCAACCAATAGCCTCACAAGCGAGATCTGGGGAGGAAGAGAACG  
CAGAAAAATCTGTTGATCGGTCGCAAAAACAGCAG

>novel\_circ\_001185

TTTGCTCGAGGCTGACCGAATCTGCCGTGGGCCGTTTGAGGCGCGTCGGCGATCCGTC  
GAAGAAGTATGGCAGTTACGCGTACCAACCTTACAACGAGAACACAGGGGCGGATGG  
AATTTGGGTGCGTTACGAGGATCCCGACACGGCCGGAACAAGGCTGCCTACGCAAA  
GGCGAAAG

>novel\_circ\_001186

TATCAGAGTTCGCTCAAGAGTTGGGCGCTGCAATGGAGAGCCATTCGGCGAACGTACG  
ACGGCTGGTCGACGAATTTCTAGCCGATCCGGGGAGACCAGAGTCGATTCCGGGAGG  
AATGCGCCGAGTTTGGGAAAGTTTACTGCGCCAGGTACAATCGGATGCAGAAGCTCAC  
TTAGATTTGGCTGCGGTCCTCCAACAGCAGCTGTCCAGACCCACCTTGGAAGCCAGCT  
TTCATCGTAAAGTCCAGTCTAAAAAGGTATTTTCTCATAGAGAAGCTTATGAACAGGTG  
GTTTCCAAGGCCGAGGAGAAATTGCAGCGTGCCCGAGCGGATTACAAACGCGCTTAC  
GCAGCGCTGCTGACGGTAGATGGCGGAAGCGAGCAGGAGCTGAAACGCGCCTACTAC

GAGGCGCATAACGCGTACATTCTTCAATTGAGAGCCACGAATGCCATCACAGAACGGT  
ATCAATCGCAATGCCTGCCCCGGCCTGCTTGGCGAAATAGCGGAAGTTTACGAGGAGTT  
ATGCGGATTGGCTTGCAAATGCATGGTTGGCATATCGGAGGCTGCCGCGGAGCGGGCC  
AGGGAGCAGACAAAGCGTTATCAGGCAGTTGCCAAAGAGGCTCAAGTTGTTGTGCCT  
ATGAACGATTTGCAAATCTTGGCACGAACTTATCAGCAACTGCAACCCCGTCCAAGA  
AACCTCGAGGCGGCTTTTCGTGGCACCCGGCCCTCCTGAACAGGTTTCTATGGAAAG  
AATCAATCAGATACCTTCCCTGAGGGACGAGTTAGCCCCAACAGGAACAAGCACTCTG  
CCACTGATGGAAGATTTACGACGGGAATACGATAGTCTTACTCAAGAGATCACTCGACT  
CCAGGACGCTTTGGATGCGCTAATTCGCATGCAACGAAAGAGCGCTGAAAGCAATCTG  
TACACGAAAGTGCCGAGTTGCAAGAGGACATCTCCATGAAGCGTTTGCCTCGGGG  
AGACGCAACTATACCTTGCAGCTGTGCAAGCACAG

>novel\_circ\_001187

GCCAAGAATCCCAAGCCGTTCCATGAGAGTGCCTCGACCCCCAGCGCGGCACCAGCC  
CTCCCCATAACCATCCCCTGGTCGAGGGATCCATCCGTCCATACCGCGGAGTGGAAG  
AGAAGGGAAGAATAGAAGAAGAAGGCGGAGGGTGGCTGGCGTGCCAAGAAGATGCG  
ACTGTTTCGCGTGGCCTGGCAGCGTGACTCGCGGTGGACTCATAAACGATGAATTGGCG  
GGCAGCGATGTTGTTGGCTCGGCCGAGAGACGCGGGAGAAGCAGCGGAGGAGGCAG  
CAGCAGCAGCAGCAGCAGCCAGGGCAGCCAGGGAATCGGTAGATCGGGCGCGCGATC  
GGGCGAGCACCGCGGGGAAACCATCCGCTTGGCATGTACGTCATCTATCCGGCAGACG  
AGTTGCTGCGTATCTATGAGTGCCCGGAACCCCGTGATGAGCCCCCGTGTTCCACTGTT  
CGTACGCCACTGTTGACCGTTGACGGTGGGGAACGGCGTAGCGGTTGTCAAGCGGCC  
GTGATCGCTGTGAACGCGGCCGAGAGCGCGGGTAAGCAGCGCCACGAGGGCGACGCG  
AGGAAGGGGAGGAGGCGCGACGGGCGCACGACGCGAAGGGCGAGAAGGGCGAGCA  
AGGGTATCCGCGGCGAGCAACGCGTCACCGCACGGACAATGCAAAACAGCCGCGCTG  
CCGCCGCCGAGGATCCCGGCAATCCTCTCAAGGATCTCACCCAGCCGGGGCTCAATGA  
GCCGCTCAAGCAGCACAATGCGGCCACCCTTAAGCTGGTGCAGACCG

>novel\_circ\_001188

CTGTTCAAATTCGTTTCGATATTAATAAAAAAAAAAAGAATGAACGTAGTCGTTAAATTT  
TGATATTTAACTTTATACAATGATAGCACAAAGCCGTAAGAAAGTCTTTTGATACATAAA  
AGATTCAACAAACATTTCAATGCAATTTTATTCACTATTGTAA

>novel\_circ\_001189

AAAAAAAAAGGTAAAAGTGCTATGAGCGAGGTTGTGACTCGTGAATATACAGTGAATCT  
CCACAAACGTCTCCATGGTGTTGGATTTAAAAAGCGTGCTCCACGAGCTATTAAAGAA  
ATTCGCAAATTCGCTGAAAAACAAATGGGAATCCAGATGTGAGAATTGATACACGAC  
TCAATAAACAACTTTGGTCTAAAGGAATTAGGAATGTACCATTTAGAGTTCGTGTACGA  
TTAAGCAGAAGAAGAAATGATGATGAAGATTCTGCAAAACAAATTATATACCCTTGTTAC  
TTATATACCAGTTGCTTCCTTTAAGGGTTTACAAACAGAAAATGTTGATGCCAGTCAAG  
ATTGATTTATTTTTGATTAATAAATAATTTATCTCAA

>novel\_circ\_001190

GGAACTCGCGAGAGGATCGAACGCCATTCTGGAACCAAGAGCCATCGCCAAGGCGCC

AAAAAATTACTTTTGGGAATGGTTGTTACGCTGGTACTCGGAAGAACAAGTGGTTGTGG  
TTTAGTGATCGGTGGATGTTTGCTTTGAGATGATGATGGATTTTAAGAAGCTGAGGGG  
AAAGATACCTCAACACAGCAACGGGCGACGAAAAACGACTCGATCGGTATGCACCTG  
GGACCGCGGTTTCGAGGCGCACTTCAAGATGCGGTAGAGGAAGTCCCTCGACCCGAGC  
TCACCCGAATCCAGACCGGTGCAACAACCGACAGTTATCCCGCGATATTCCCGGTGAC  
ACGTACGAAGCATAATAATCGCATGCATAATAACAACAAATCAACGGAGCGGAGACTCCTG  
GAACGTAGAAAAGAAGGAAAAGAATCCGGCAAAGGATTCTCTGAAATACCCATCCATC  
CACTCAGTGCGGCCAACCCAAGGCTCTCTCTCAGTTTCTCAGGCCGAACGAGCCCGG



GAGCCTCGGATCGATCGATCGATGAGAACCACTGCCCTCTGAAAGGATCCCTTTAGAG  
GAGCGCGCCTAGGCGCGCGCGATCGTCCTCCCCTTCGAGAAAAAACGTCATCGTCGAC  
CTTCCCCCTGCCCCCCCCGCGTTAAACCGTTTCCCTCCCCCGTCGAGGGGGCACCTT  
TTCGAGAGAAGAGAAGTGAAGAAGAAGAAGAAACAGAAGAAACAGAAGAGGAGGA  
GGAAGAAGGAGAGACCCGGTCGTCGTCACGGTGGCAAGCTTAGTGAGCGGGAACGTA  
GCGGTGCGTTACGATGAGGCGTCAGGAGTGGTTGGCACGGGGGGTGTCTGTGTTGGCA  
GCCACTCCCAGGTTAGCCGCCGCTACGGACCAGGCCACGTCCGCCACCATGGACACCA  
GCGACTCCAGCATGGACACGACTAACGGGGGGGGGCTCGAGCGCCGGGGTGGCGTGG  
TCGGTGGGACGATCGCCTCTGTGGTGGCAGGGGGCCGCGTCCTTGACCCTGGTCAAGGC  
CGAGACGCCCCGAACACCTGGCCGGGACGTGACGACGGCCGCCGCGACGCCGACGC  
CCCCGTCGGTCCCCGTCGGATCGGCGGTGGCCGGGACGGCCGGTGGCGCCCTCTTCCC  
CGGCATGGCCGCGGCGGGCAAGGGCGCCGCGAGATCCGACGACTGGCTCGCGAACGC  
GAACAGCCCCGGTCGGCTCCCCGTCCGCCGCGTTGCAGCCGCAGCACGTGGTCTACGG  
GAATCCTCAGCAACAACAGCTCGCCGCCGAGACGCAGCAGCAGCAGCAGCAGCCGCC  
CCTCGCCCCTCAAGCCCCCTCGCGCATCAGCAGCAACAGCCCAACAGCAACAACGG  
CTACGCCAGTCCTATGAGCACCAGCAGCTACGATCCTTACAGTCCCAACAGTAAGATAG

>novel\_circ\_001194

ATACCTCAACACAGCAACGGGCGACGAAAAACGACTCGATCGGTATGCACCTGGGAC  
CGCGGTTTCGAGGCGCACTTCAAGATGCGGTAGAGGAAGTCCCTCGACCCGAGCTCAC  
CCGAATCCAGACCGGTGCAACAACCGACAGTTATCCCGCGATATTCCCGGTGACACGT  
ACGAAGCATAATAATCGCATGCATAATAACAACAATCAACGGAGCGAGACTCCTGGAA  
CGTAGAAAAGAAGGAAAAGAATCCGGCAAAGGATTCTGAAATACCCATCCATCCACT  
CAGTGCGGCCAACCCAAGGCTCTCTCTCAGTTTCTCAGGCCGAACGAGCCCCGGGAGC  
CTCGGATCGATCGATCGATGAGAACCACTGCCCTCTGAAAGGATCCCTTTAGAGGAGC  
GCGCCTAGGCGCGCGCGATCGTCCTCCCCTTCGAGAAAAAACGTCATCGTCGACCTTT  
CCCCCTGCCCCCTCCCCGCGTTAAACCGTTTCCCTCCCCCGTCGAGGGGGCACCTTTTCG  
AGAGAAGAGAAGTGAAGAAGAAGAAGAAACAGAAGAAACAGAAGAGGAGGAGGAA  
GAAGGAGAGACCCGGTCGTCGTCACGGTGGCAAGCTTAGTGAGCGGGAACGTAGCGG  
TGC GTTACGATGAGGCGTCAGGAGTGGTTGGCACGGGGGGTGTCTGTGTTGGCAGCCA  
CTCCAGGTTAGCCGCCGCTACGGACCAGGCCACGTCCGCCACCATGGACACCAGCG  
ACTCCAGCATGGACACGACTAACGGGGGGGGGCTCGAGCGCCGGGGTGGCGTGGTCG  
GTGGGACGATCGCCTCTGTGGTGGCAGGGGGCCGCGTCCTTGACCCTGGTCAAGGCCG  
AGACGCCCGAACACCTGGCCGGGACGTGACGACGGCCGCCGCGACGCCGACGCCCC  
CGTCGGTCCCCGTCGGATCGGCGGTGGCCGGGACGGCCGGTGGCGCCCTCTTCCCCGG  
CATGGCCGCGGCGGGCAAGGGCGCCGCGAGATCCGACGACTGGCTCGCGAACGCGAA  
CAGCCCCGTGCGTCCCCGTCCGCCGCGTTGCAGCCGCAGCACGTGGTCTACGGGAAT  
CCTCAGCAACAACAGCTCGCCGCCGAGACGCAGCAGCAGCAGCAGCAGCCGCCCTC  
GCCACTCAAGCCCCCTCGCGCATCAGCAGCAACAGCCCAACAGCAACAACGGCTAC  
GCCAGTCCTATGAGCACCAGCAGCTACGATCCTTACAGTCCCAACAGTAAGATAG

>novel\_circ\_001197

ATTACATAAAATATTTATTTTACAAGTAAACATCATTTAATCATATAAAATACTTTGTCAAT  
TAATTTATCGCTATTAACGTTTTTTCTTTGCTTTCATCTGTATCCTACGACTTTTTCCTAAT

CTCTGCTTTGATTTTCCTTTTTTTTTTCTTCGAATCTTTTCCTG

>novel\_circ\_001198

AAAAAAAAAAGGAAAATCAAAGCAGAGATTAGGAAAAAGTCGTAGGATACAGATGAAA  
GCAAAGAAAAAACGTTAATAGCGATAAATTAATTGACAAAGTATTTTATATGATTAAATG  
ATGTTTACTTGTAATAAATATTTTATGTAATCTTGA

>novel\_circ\_001199

AATGGAAAATTGTTATCGCTGCATCGTCATGCACATGAAGCATCCGAACGTCCTTCAAT  
ACAAAGAGACCTGGTGTATCACGGGATCGTCGAAGCCCACGCTCCCCCTCGATATGCGG  
CGATTTGACGAGCGACGCCATATTAATTTCCCTATTCCGCACGGGGGCAGCACCGATGC  
CCTGCCCCGTTCAAGGGACCCCTGGAATTCACGTACAGCCACGGGGAAGCGGAGTGTA  
AATCTCCTTTGTCCGCAGCGGAGACGTGCACCCAAGAATCGCGATTACTTTTTTCGCTAT  
CAAGCGTGTGCCAACGTGTTATCCTCCGAGAGCGTCGACGTGGAGTTGGAGTGTCTAG  
CCACGTGGAAGGAGAGCAGCACGCACAACCTCGTGGCAAGGTTGCACGCCCCGCGG  
AAGACCAGCGATGAGGACAGCTACAGATGCTTCATCTACGAGCAAACCTTCGAACAATT  
CGTGGAATTTGGCGCAGAGCGAGGACGCCTCTTGACGGGATTGATCAGCGTTAAGGA  
GGCTGCCAAGACGTTCAAGATGAAACAGA

>novel\_circ\_001200

CCATGGCGAGGACCTCATCGTCACGCCGTTTCGCGCAGATCCTTGCTCTCTGCGCTCG  
GTCAGGAACAACCTTCCTGTCGCTTACTAATGTGCCCACCAACAAATCACGAAGGAGTA  
GCGGTGCACAGGGTAGCAGCACGCCGACGGATCTTGGCACCGGGGGAGGAAA  
ACTACATGAAATTGGCGGTGGAGACTATGGAGGAGCTGGACTGGTGCCTGGACCAACT  
GGAAACCATTACAGACTCATCGATCCGTGTCCGACATGGCCTCTCTGAAG

>novel\_circ\_001201

AGAGAGAGCGGATGCTTCTCGAAAGGAGCGAGTCCTTCCACTGTCGACAATCAGTTCC  
CGTTGCACACTCGCGCGAGAACAACGCCAATCAGCCAAGGATCTTCTCCTTCCCTCCT  
GAACCTGAAAGCTGAAATCAAACCTTCGGATCATCCGTGCCTCGTCGCTTTCCACCGCA  
CGCGCGCGCGCGCACGCACGCACGAAATCTTTCCTTCCGTCTGGCAATTCTCTCGCGC  
CGGTCGAACGTGGCAACCACCGAGGCGGACCGCTCTCCTTCCCAAGAAGAATCAATC  
CGTGCGATGAACGACCGTTGGAAAAGTTTGAGGTTTCGTGATGGGATCGGGATCCGTC  
GGAGGCTGTTTCAAGTTGAAAAGATTTATCGGGCAGGGAGAGGGGGGAGACCGATATATA  
GCCAGCGGGTGAGATCGAGTTTGTGGAAAATCGATGGAGAGAGAGAGAAGGAGAGG  
CGATTAAAAGGAGCGGTGAAAAGGATGTAGTAGTTGTAGTCAGCAGTCGTAGTAGCAG  
TCGAAGGAAATCGATATAGTTTCCAGCACGTGGCTGGCTTTAAACTGGCGGTTTAGTTT  
ACGCCTATATACACTGATAACCTCGCTTAAAAGAAAAATAAAGAAGAAGAAGAAGGAG  
GAGGAGGAATAATTCGTGCGAGTGTGCTTTGATCGAGTGAATCTCTCGAAAAATCTTCT  
TTTCCCTTTACGACGTTCTTTTTTCTTTTTCTTTTTCTTTTTCTTTTTTCATGTTAACTGGG  
AGCACAAGATAGAGAAACATTAGTAAGGAAGTAATATAGCAGAAGGTGAAAATCGTG  
TGTGCCGATCGTGTTCTCTCTCGACAATCCCCAAGCCAGGGATCTCTCCTCTCTCGGGA  
AGATCAGTGAAAAAACAGTGTTGAAAATTGTGAAGTGCAAGCTTGTTAATCGGAGAA  
AGATCGAGAAAGTGAGAAAGAAGAAGGAAGATCTTTGAAGAATTGTTTCGAGGAGTC

TTAGGAGTCTGGCGCCTTCATCGAGATCCCAAACAGGGATCATTGAGAATTTTGTACGC  
GAATTGAGAGCAAAGGCCTATATTATATCAAATTTTCATCGTCCATCCTTCATACTTTCTC  
GCCTTAATCATCGGTTTCGATAGAAAAACCGAATATTTTCGAAAGAAGCTTGGTCGTCGAG  
GAGCATAGGCGGGATAAGAAATCGATGTGATAAGGGAAGAGGAGGAAGAGTTTGAAA  
ATAATTCGATTAACCTTCGAATCCGGCAACCCTCTTTATCGAAGTATCGAGTTGAAAGGG  
TTGAAAGGGAGGGATTCTCGCGGCTTATCTCGCTCTAATCCGAAAGGAAACTTTTCAA  
ATTATCCTAGTCGAATAAACTGGGACTGAGAATACCTGAACGGTATTCAAAAAAACCAT  
CATCGTGAAAAGGAAGCAACTGGAACGCTGTAACGTAAATTAAATAATTGTTTCGAGAC  
AATCCAAAGATATCCTCGAATCGAGGCCAGATCTAAAAACTAAAAATTAATACTAAATA  
GGATCATTTCTATAGACGTATTTAATAGAATAGATGTTGGATCTCGACTTTCAAGGGGCT  
CAACAACCTTCTAGACTACTTTTTTCCAACCAAAAGCCATCCATCCTCGAATTTCTAGCAA  
AGCTATTTCAAACGATACACTTTTATAAATCCTAGACAAGGAATTCTCAAAGAATTCGA  
CCATCAAGCTGGACCAGGTTCGACCAACTCCTCTTGGTAAATTTTTTTAAAGGCCAAATC  
CGACTCAGCCTATTAATCGTCACTTGGCAACTCGTGGGATCTTAGTTTCTCAGGCCTCT  
GAAACTACTCACTCCATTACTAAAGCTTTAAAAAAGAAACAGTGAAACAACAAGC  
GGGAAAGAAAATTCTCCACTCGACTTTTCCACTCGACTCTCGTAGATGCTTCTTCGCAG  
CAATTCCTTCTCTGGACACTTTCTGGACAAATGGGAAAGCGATGTAGCCTTGGCGGC  
GGGGGTGGGGGTGGTGCAGCTGTCTCGGGGGCCACCCCGAGGCTAAGAAGGGTTCC  
ATCGGCCACAAGTGCCAGCAACAGCAGCAGCAGCAGCAACAGCAGAGCCAACACCT  
GCTGCAGCATCATCATCAGCAACAGCAGCAGCAACAGAAGCAACAGGAGAGGGATAA  
ACAGCAACAGCAACAGTACCAGCAACAGCACCAGCAACAGCACAAGAGTAAGGGGT  
CCGCGGTGAGGGGGGGCGAGTTGGCGCCTCTGAGCAATCTCGACGAGGATCTGGACG  
ATCTTGAGGACGAAAAGGGGATCGAGCAGAGGGGGGAGGAGGAGGTACGCCAAG  
GAGGGCGGGACCCAGCATCGGTTGAGCCCCAGGCTGCACGATATCGAGGAGGAGGAC  
GATGAAGACGGCCGAAACACCAAGGAAAGGCCGTACCAGAAGAAATCGCCAACCCC  
GAGTGGCGGTGGAGGCAGCAGAACGGGTTGGCGATCGCGCAGAAGCATCACCACGGC  
AGGTGCACCGGCTCACCAGCACCACGTGATCGCCAGTGCCGCTGCAACTGCACAGGC  
AAAGATGCAGGCCGAACAGGGGAGCATCGGTGAGCTGCGGGGCTACCACAACCTCAG  
ATCCAGAAGACACACTTTGGCCAATGTTTCG

>novel\_circ\_001203

TTATAATATTATAAAAATAAACGTGAAAGATACAAATGAAAAGAGAAAATAATTAATAA  
GTGATATTCATATCAAATTCATCCTTGTGATAAATAAGAATATCTTTGAACAACATATTAG  
GTCCTTCATAATTGAAATCATAGAGAGGTTTATCT

>novel\_circ\_001205

GAGGAACAGCCACGAATCCGTCTTCGTCTCCCCGACGAGGTTCCCAGCGACGTGCT  
GTACAACAGGCTGGTGGTCAGCGAGGACGGTAGCGAGACGTTCAAGTATTCATCCCAG  
CCTTACGGCTTCCCCGAGAGGCTTCTTCTGCCCAAGGGCAAGAAAGAAGGTATGCCGT  
ACAATGTGCTCGTGGTCGTCTCGCCATTCGACGACTCGAACGTCGTCCAAATAGACTC  
CCCTGTGTGGGGGCGCCACATTTACGACGGACGTGCTATGGGCTTCCCTCTGGACAAG  
CCTGTGCATCCTTTGCTCTTAGTACTGTCCAACATCCACGTGAAGGAGGTCCTCGTTCA  
TCATAGGGAGATGGAGGAGTTGAACGTTGCCCTGTAAACGTGTAGAATTTAATACGTAG  
ATTTAATCTTTTCTTCCTTATTTTTTTCTTTTTTTAAATTATTTGAAGTAGAAAAAAAAA

GAATTCGAAGTTTAAAGGAAGAGAGATGTAGAGAGAAAAAAGAGATGTG

>novel\_circ\_001206

CACATTGTACGGCATACTTCTTTCTTGCCCTTGGGCAGAAGAAGCCTCTCGGGGAAG  
CCGTAAGGCTGGGATGAATACTTGAACGTCTCGCTACCGTCCTCGCTGACCACCAGCC  
TGTTGTACAGCACGTCGCTGGGAACCTCGTCGGGGACGACGAAGACGGATTCTGTGGC  
TGTTCTCTCGATCGTGTTGCTTCCGCTTTTCACTGCGAAAAAAAATCGAAAGGAATG  
AAAAAAAAGTTTCGAGAGATTGATTATTGTCCATTAATAAAGATTTTAGAGCAAAGAAG  
TTAAATTTTTTAATTACTTTTTAGCCTTCTAACCTAAGATCTAGAAGATTGAATATTAATAT  
ATAAAATAGAGGAATTTTTTTTGTAAGTAACACATAATTATTTCAATTATAAAATTAT  
ATAAAAGATTGCCCTTCTCTGTAAATAGAAAGAAAAATTCATTGCAAAAATAAACGTGT  
TTTGATCGGATTCATTATCTCTTCCAACAACAATAGAATATACGTAATAGATATAAGAG  
AAACTATTCTTATTATACAGTTTGTAACGATAAAATGATACGTACGGTTAACCACGA  
ACTCGTCCATCTGCATGAAGTTCATGTAATTGTGCACGAG

>novel\_circ\_001210

CAAGGATTGAACGTTCTTGGTAAACATCGTTCAAGGTAACGGAGACAGCGTTAACGTAC  
AATTATACGGACAATTGGATCTGCTCGTGAGAAAGTCTTAGGTTTCGGTTACGAATCC  
AACGTCAAGTATCAAGTCGTGCCATCCGCTCTTCAAATGTGGTCTACCAGCTTGAGGGA  
TCCTGTATTCTTCAGCATCTACAAGACCATCCTTGATTATTATCACAAGTA

>novel\_circ\_001211

ACTTGAACATATTTCTGCATATGAAGTGGAACCGTAGCACCAGTTTCTCTCTGAGGGAA  
GGCAAGTCCATTGCGGAATCTCATAGTGGGATAATATCCAGTCGGTATGGGATGATCTA  
GGCTCACATAACTAACCTCACCCATGTCGTTGCTAAGTCTCTCAAGGTAATATC

>novel\_circ\_001212

TGGGATAATATCCAGTCGGTATGGGATGATCTAGGCTCACATAACTAACCTCACCCATGT  
CGTTGCTAAGTCTCTCAAGGTAATATCTGCGAGATGAATTTTAATTCGTAGATGTCGTTG  
TATTATATTTCTTACGCGAGAGAAATATATGTGTAGAAAAATTGAAACTGTCTATAAAAATA  
TTTTTATAGTTTGTTAAAGTAACGTACCTGTTCAATACTTGCTTATGGAGGAAGAAATAG  
AATTCACCCCGAATTTGTGGAAAGTTGAGCGAGTTTGAAAGCATGAAAG

>novel\_circ\_001213

TTTGAAAGCATGAAAGGTGGATAATTGTGATTCAACATGAAGTAGAAATGGTTGAGGC  
CAACATCTTCGGTGAAGTAGTTTAATCTCTGCTCGGGCACGTTGTGTTTGGTTAAGTAC  
CATCCGGTATAGTTCGCCGCAAGTAAGTAATAATCGATGTT

>novel\_circ\_001214

GTGGATAATTGTGATTCAACATGAAGTAGAAATGGTTGAGGCCAACATCTTCGGTGAA  
GTAGTTTAATCTCTGCTCGGGCACGTTGTGTTTGGTTAAGTACCATCCGGTATAGTTCGC  
CGCAAGTAAGTAATAATCGATGTTGTTGTAAGTCTTTTTTCATGTCAGCTATTAAAAATGA  
AAGAAAATTTTCATGAATAATTTTTTAATTTCAAAAATTAACCCGTTTCTTCCTTCGT  
AAAGAATTATAATTTTATTTTCATATGTGCTATAAATTTTGCATTTTTCGAAAATTCATTCTT

AAATATACGAATAAAAGAAAGAATAGAAGATTGTATATAATAAAATTATAATATTTAACA  
GACTCATTATTGGTTGAATAAATTTTCGAAACAGTCTAAATATATTTTATTCGTTGTCTCC  
GAGACAATTTGGTTAAGTCATATAGGAATAGATTACGTTCAAATGAATTGAACAAATT  
CAAATCGATAAAAATATTTTTTCATCTAAATTTTCAATTCCCATTTTCTAAAATTGGATAT  
ATAAAGATTGGAATTCGAATGAACTTTCTACCAAAGTTTCAAATGAATAAAAATTT  
TCATCGATTGAATTTCAATTCTATCACTCTACAAGTGTTTCATCGAGTTTCTTTTAATCACT  
TGTTCAATTATGTATCATGTATTTCGTATATAGAAATAAAAAATAAAAAATAAAAAATTTCTAC  
ATAGCCAACCTGTGTCACCCATGGCAATGTTGTAAGCTTTCTGCATGACCTCATCATTG  
AAATATAAATGTGGCATCACCTCGTACATTGGCGGCAATTCATCAGTTTGGTGTACAGG  
ACG

>novel\_circ\_001215

CAAGTAAGTAATAATCGATGTTGTTGTAAGTCTTTTTTCATGTCAGCTATTAAAAATGAAA  
GAAAATTTTCATGAATAATTTTTTTAATTTCAAAAATTAACCCGTTTCTTCCTTTCGTAA  
AGAATTATAATTTTATTTTCATATGTGCTATAAATTTTGCATTTTGCGAAAATTCATTCTTAA  
ATATACGAATAAAAGAAAGAATAGAAGATTGTATATAATAAAATTATAATATTTAACAGA  
CTCATTATTGGTTGAATAAATTTTCGAAACAGTCTAAATATATTTTATTCGTTGTCTCCGA  
GACAATTTGGTTAAGTCATATAGGAATAGATTACGTTCAAATGAATTGAACAAATTCA  
AATCGATAAAAATATTTTTTCATCTAAATTTTCAATTCCCATTTTCTAAAATTGGATATATA  
AAGATTGGAATTCGAATGAACTTTCTACCAAAGTTTCAAATGAATAAAAATTTTCA  
TCGATTGAATTTCAATTCTATCACTCTACAAGTGTTTCATCGAGTTTCTTTTAATCACTTGT  
TCATTATGTATCATGTATTTCGTATATAGAAATAAAAAATAAAAAATAAAAAATTTCTACATA  
GCCAACCTGTGTCACCCATGGCAATGTTGTAAGCTTTCTGCATGACCTCATCATTGAAA  
TATAAATGTGGCATCACCTCGTACATTGGCGGCAATTCATCAGTTTGGTGTACAGGACG  
GTGGATCACGGCTACGCTTAACGCGTA

>novel\_circ\_001216

GCCGGTTTCCTATTTCTCGCGAGTCTCTGCTTGCTTGTCAGGCGGTGCCCAACAAGGT  
CGCCGACAAGACGTATGTCACCAGGCAGAAGAACATCTACGAACTCTTCTGGCACGTG  
GACCAACCGACCGTTTACCATCCGGAAGTCTACCAGAAGGCGCGCACTTTCAATCTCG  
TTGAAAATCTCGACAACCTACAATGACAAAGAAGCGGTGAACGAGTTCATGCAACTCTT  
GAAACATGGAATGCTTCCACGTGGCCAAGTGTTACGATGATGAACAAGGAAATGCGC  
CACCAAGCCGTGGTGCTTTTCCGTCCTTGTACAGCGCCAAAACGTTTCGACGTGTTCT  
ACAACACAGCTGTCTGGGCCAGATTCAACGTAAACGAACAAATGTACTTATACGCGTT  
AAGCGTAGCCGTGATCCACCGTCCTGACACCAAAGTATGAAATTGCCGCCAATGTAC  
GAGGTGATGCCACATTTATATTTCAATGATGAGGTCATGCAGAAAGCTTACAACATTGC  
CATGGGTGACACAG

>novel\_circ\_001217

TTTGTTCGTTTACGTTGAATCTGGCCCAGACAGCTGTGTTGTAGAACACGTGCAACGTT  
TTGGCGCTGTACAGAAGACGGAAAAGCACCGGCTTGGTGGCGCATTTCTTGTTC  
TCATCGTGAACACTTGGCCACGTGGAAGCATTCCATGTTTCAAGAGTTGCATGAACTC  
GTTACCGCTTC

>novel\_circ\_001218

GCCGGTTTCCTATTTCTCGCGAGTCTCTGCTTGCTTGTCCAGGCGGTGCCCAACAAGGT  
CGCCGACAAGACGTATGTACCAGGCAGAAGAACATCTACGAACTCTTCTGGCACGTG  
GACCAACCGACCGTTTACCATCCGGAACCTACCAGAAGGCGCGCACTTTCAATCTCG  
TTGAAAATCTCGACAACCTACAATGACAAA

>novel\_circ\_001219

TAACAGCATCGAACGCCAGAGCTCGGAATCACCGTTCACGACGTCAACTATAATGCCC  
AGCGACATATTCTACGACAACTGAACAAAGCGATCGGCGGAAGCGAACCATTCACTT  
ACTCTGAAAAAATGTTGGGCTTCCCCGAACGTCTCATCTTGCCCCGTGGTAAACCGGA  
AG

>novel\_circ\_001220

GTAATCAACGCGTTGGAGATGCGTTTAATGGACGCTATCGATTCCGGATACTTGATAGA  
CGAATATGGAAAGAAGATAGACATTTACACACCAGAAGGTCTAAATATGCTTGGCAATG  
TAATAGAAGGAAACAGTGACTCTATTAACACGAAATTCTACGGTATGTACGATATTCTTG  
CTCGCGATATCCTGGGCTACAACCTTCGACTTCCAGAATAAGAACAACCTAATCCCGAGC  
GCTCTTCAAAGTTATTCCACCAGCATGAGAGATCCAGCTTTCTATATGCTCTACCAAAA  
AATCTTGAGTTATTTCTTAAGATACAAAAAACTGCAGCCTCAGTACAGTCAAAGCGAA  
CTGCAGATGCCAGGAGTTAAATTCGAATCTGTGAATATCGACAAATTGTACACGTACTT  
CGACAAATGTGACACTCTGATCAACAATGCCGTGGCAGTAGAAAATTTCAAAGGTGGA  
ATGTATTTACGTTTGAAGGCGCGTCGTGCTTGTATGAACTACGAGCGATTCACTTACAA  
AATAAACATCAACAGCGATAAGGAAACGAAAGGAATGATGAGAATCTTCCTTGGGCCA  
GCCTTTGACGAGATCAAACACGATATGGTCTATCTACAGAAATATTTCTATCTGTTCATG  
GAAATGGACCGATTTGCCGTAACAC

>novel\_circ\_001221

GTCTAAATATGCTTGGCAATGTAATAGAAGGAAACAGTGACTCTATTAACACGAAATTC  
TACGGTATGTACGATATTCTTGCTCGCGATATCCTGGGCTACAACCTTCGACTTCCAGAAT  
AAGAACAACCTAATCCCGAGCGCTCTTCAAAGTTATTCCACCAGCATGAGAGATCCAG  
CTTTCTATATGCTCTACCAAAAAATCTTGAGTTATTTCTTAAGATACAAAAAACTGCAGC  
CTCAGTACAGTCAAAGCGAACTGCAGATGCCAGGAGTTAAATTCGAATCTGTGAATAT  
CGACAAATTGTACACGTACTTCGACAAATGTGACACTCTGATCAACAATGCCGTGGCA  
GTAGAAAATTTCAAAGGTGGAATGTATTTACGTTTGAAGGCGCGTCGTGCTTGTATGAA  
CTACGAGCGATTCACTTACAAAATAAACATCAACAGCGATAAGGAAACGAAAGGAATG  
ATGAGAATCTTCCTTGGGCCAGCCTTTGACGAGATCAAACACGATATG

>novel\_circ\_001222

ACAGAATATGTAATTCGTTTACAATTTGGATAACACGATATTAAGCAATTGCTTCCGTAG  
TACTTTGCCGGATGGAGTCTTGGGTAAAGTTTTCGACGAATTTAACGCCGCCTCTCAGCC  
ACTTCTGCGGCGATAAATTTCTAAAAGCAAAATTGTCGTTAATAGCGCATTTCACACT  
TTGCTTGAACCATTCAAACACACGGACGCAAGACTCACTTTTCACGAAATCCACAATT  
TCTTCGGCCGTACGTTGCTGCCTGGTTGCCTCACCACCACGGCCATCGGCAACTCTC  
CGCACACCTCGTCGGGTTTACCCAACACAGCCACGTCCTTGACACTTGAATGCGTTAG

CAACAATGCCTCGATCTCGCTTGGCGCCACTTGGAACCTTTGTACCTGATGATTTCCCT  
TTATTCGCCCCGTGATGTACAATCCTCCTTCCTCGGTGAAATATCCGAGATCGCCCCGTGT  
GAAGCCAATTCTGCTCGTCGATCGTTTCCGCGGTGCTTTTCGGATTCTTGTAGTATCCCA  
ACATTACCTGATCACCGGCGAAGCAAATTTCCCCCACTTTCCCCGCGCCAACCGTCTTC  
CCCGTTTCCATGCTCACCACTTGCACTTGAAACCTGGCAACGGGGGGCCGATCGAGG  
CGTCTTTGCACGATCTCTCGCTCAAATTCGACACCATCGACAATTCGGTCATTCCGTAA  
CCGTTTCGTATGTTTTTCACTTTCGTGCGCC

>novel\_circ\_001223

ACATACTCAGGACTATTCTGCGTGGTGGTAAATCCATACAAGAGGCTGCCAATTTACAC  
GGAAAAGATAATGGAGAGGTATAAGGGTATTAAGAGACACGAAGTTCCACCCCATGTT  
TTTGCCATTACGGACACCGCATACCGTTCTATGCTTCAAGATCGTGAGGACCAGTCAAT  
TTTATGCACCGGTGAATCCGGCGCTGGTAAACAGAAAACACGAAGAAAGTAATTCAA  
TACTTGGCATATGTTGCTGCCTCGAAACCGAAATCGAATGCGACACCAAGTCCGGCATT  
AATCATAGGTTCCGGAAATATTTTCGGATAAATTTGCGGTAATTAACGGTGAATTGGAAC  
AACAACTTTTACAAGCAAATCCGATTTTAGAAGCTTTTGGGAACGCAAAAACAGTGAA  
AAATGACAATTCATCCCGATTTGGTAAATTTATACGAATAAACTTCGATGCTTCCGGTTA  
CATTGCTGGTGCAAACATAGAAACGTATCTTCTGGAAAAGTCAAGAGCAATTTCGACAA  
GCAAAGGATGAAAGAACTTTCCATATATTTTATCAACTTCTAGCTGGTGCCTCACCTGA  
ACAAAAGA

>novel\_circ\_001224

GTCGAAGGTACGCCGCGGCAGGCCGCGGCTCGGAACGAGAGGTGGAAAGCATGGAT  
CCCCGTCCGTGCAAGGTAATTCGCCATCGAGGAGCGAATGGTTACCCTTGGACATGAG  
AACTACTCCTCCTGCTGCGATGCCTGCTTTCCGTGGTTTCGAGGAATCCTCCTCCGATG  
GCGTGGTGCATCTAGGGGAGGGAATAGCAATTTGCGAGGAACAATAAGGGCTGTGA  
AATGGAGCGATTACAGGAAATTGACACGTGGCCTGGCTGCAATTTTGTTTAGCCCTACC  
GAGTTGGCCACTTGCTCGGTAACGGGGCAACGATGGAGTCGAGCTGGGACTGCCACT  
GAGAGACCGGTGAAACCTGCCTTGGATAAGGCCAAAGTCCAGGCTATCATATCTTACG  
TGACATCGAGATTTTCTACAGTCGATGTGAGCAGTGTGAAGCAAGTGTTGGCTTACAA  
ATGCAAGGAGAACTCGACAGCGCTCAAGATGAAATCTATTAGATACATTTG

>novel\_circ\_001225

ACAAATCCATGCAAGCATCCGATAATATTTATGCGTGATGTGGAATTTGAACATCTACAG  
TCACTTTTGAATTCATGTATGCTGGAGAGGTTAACATATCTCAAGCAGAATTACCTACA  
TTTTTAAGAACTGCTGAGTCTTTGCAAATCCGTGGCCTCACTGACTCTCAAATAATCA  
GCACAACAACGAAAAGCATTGGAAGACAAACAATATACATGCATCAAATGGTCGTGGG  
TTGATCTCACCAAATTTAGAGGAGGAGCGTAGTAAAACTCCACCAACCTCAAGTCCTC  
CACCATAAAAAGGCTGTGCAAACGAAGTGATTGCGCTCAAATATCTAGTCCAGTACC  
AGCTGCGGCGGCCTGTGCATCTGGAACACCACGCACACGGCCATTAATTGAGCCACAG  
GTTCAACTTGACTGTTATAAAGATCTCGATATTGTTGAG

>novel\_circ\_001226

GAAGGTGAGGCGATATCTTTCGTGCGCCACAGCGTCCAAGCTGGCCGCCGTGGAGGATG

CCGCTTCGAAGGGGCCCCGAGGCTTCGATTCGTTTCGAAAGTCTCGCCCAAGGCAAGGG  
CCGCCTTGCAGGCCCTTCGGTCGCCGAGAAACAGAATATCAACACCTCTTACCCCTCC  
TCCAACGACAACCAAAGACGTTCGAGACCATTACAGAAAATGAAATTGAAATTAATTGA  
TTGGAATTAAGATTATGTACCTAGGTAGCAGTGAAAATCGGCCCAATGGCCCTGCAAA  
GCTTAAAAAAATTCTCGAAAAAAAGGAAGGCATTCTTAACAAATGGAGAAATGAGGT  
CTGCAGTGGAGGTGAATTACCAGAAGTTGAGATCATCAGTTTGCTAGAAGAACAATA  
CCTAGGTACCGTTTGCGAGCTGACACTCTTACTCAATTCCAAGGATACGAAAACGCTGA  
TTGGTTCAATTCATCACCGGCCCTAAAATCTGTCGACACTGATTTGAAATTATCGCCGGA  
TCAAATCCGGGAGACTCTTAATTACTTTA

>novel\_circ\_001228

TGTGAGAAGCGTAATGCACAAATATCTGGAAAAGAAGAAGGAAGTTAACTTCGATAAA  
ATATTCAATCAAATGTTTGGTTACCTCTTATTCAAAGACTACTGCGAGAATGTGGCGGA  
GGAGCCGATTCCGCAACTTAGGTTTTACGAAGAGATCAAGGCGTACGAGAACTCGAA  
TGCCCGGAAGAGAGGAGAAAACCTGCCAAAGAGATCTACGACAATTTTCATCATGAAG  
GAGCTGCTGGCACACTCCCAT

>novel\_circ\_001229

CTGACAATGAACGACTTCAGTGTACATCGAATAATAGGAAGAGGCGGATTTGGAGAAG  
TTTACGGGTGTCGAAAAGCAGACACGGGGAAAATGTACGCGATGAAATGCCTTGACA  
AAAAACGAATAAAAATGAAGCAAGGCGAAACTTTAGCGCTCAACGAAAGGATAATGC  
TTTCGGCAGTCAGTACCGGAGTCGATTGTCCATTTATAGTATGCATGACGTACGCCTTCC  
AAACGCCGGACAACTGTGCTTCATTCTGGATCTGATGAACGGTGGCGATCTTCATTAC  
CATCTAAGTCAGCACGGAGTGTTCAACGAGCGAGAGATGAAGTTTTACGCGGCAGAA  
GTGATATTGGGATTGGAGCACATGCACCGTAGATACATCGTTTACAGAGACCTGAAACC  
TGCCAATATCCTTCTGGACGAGCATGGCCATGTCAGAATATCGGATTTGGGGTTGGCTT  
GCGATTTCTCAAAAAGAAACCGCATGCAAGCGTAGGGACGCACGGGTATATGGCACC  
GGAAGTGCTTTTCGAAAGGTGTAACCTACGACTCCAGCGCCGATTGGTTCTCGTTCCGT  
TGTATGCTGCATAAATTGTTAAAAGGTCATAGTCCATTCAGACAGCATAAAACAAAAGA  
CAAACATGAAATAGATCACATGACATTAACCAAG

>novel\_circ\_001231

TATCAACGTGGGAGCGGTTAACCGTTAGATAGAATCAGGAAATGAAAATGCGAGTCGG  
ATCGACTCTCCACCTTTTCAATATCTTGCTTCAAATCCACCTCTGGACCACCACGATCCA  
CGTCGCTGCTGGCGGCGAGGATAAACTTCGCGTGATCTTCCAATGGAAACAGCTCGAT  
TACGAATGGCCGAGCAACGAAACCAAACCTTCTCTTCCCAGGATACAAACAGGAAGAC  
AACCTTCCCCTCGGCCTCGAGATCACGAGCACCAGGATATTTGTCACTGTGCCGAGAT  
GGAGGCGCGGTGTCGTTGCCAGTTTAAATTATTTTTACGTAAATGATACGCGGGAATCT  
CCTACTTTGATACCTTATCCTTCTTTCGAGGCGCATCAATACGAAGCTGGAAGCGTGCC  
GGAGATCATTTCGCCGTTTTCGAATCCGGGTGGATCGATGCGAAAGATTGTGGGTCTCG  
ATACTGGATTACAGATATTTTGCAAATCCGGAACAAGAGGCGCCGCCTGCGTTGCTC  
ATTTACGATTTAAAAAACGACCGATTGTTACGAAAATTCGTTATCCCCGAGGATCAAAA  
AACGCACGATTCTCTTTTCGCGAATATCGCGCTCGAAGATTACTCCTGCGAGGATACCT  
TCGCTTATCTGGGTGATCTGGGTGGCCCCGGATTGGTGGTCTACTCGTGGAAGTCGAG



AAAATCATGGCTCGTCAAGCATCGATTCTTTCAACCCGATCCGCAAAGCGAGGAATTC  
AACGTGTCGGGAATTTTCGTTCCAATGGACCGACGGTCTGTTTCGGTATGAGCATCGCGC  
CATCTAACGATGGATACAGCGTGATGTATTTCCATCCACTTTCCAGCACCATGGAATATT  
CGGTCAGTACCAAGATATTGAGAGATTCCGAGCGCGCCAATTCTCCAGACAACTTCAA  
AGAATTTTCGTGCTCTCGGATCTCGAGGACACAATGGTCAGAGTAGCGTCAGTTTTTTG  
GACCCGGACACCGGAGTTCTTTTCTACGCGTTGACCAATTTAAACGCTATTGCGTGTTG  
GAAACCTCGAAACATGTTACGCTTCACCAACAAGGTCTTATTTATCAAAACAGTATCA  
CGATGGTTTTTCCTAACGATTTAAAG

>novel\_circ\_001233

GCGCTCGAGGAGAAGGCGAGGAAGACCCAGGAGGCGCTCGAGAAGGAGGAGAAGCT  
GCGCAAGGAGCTCGAGGAGCAGAACAGTAACTCGTGACGGAGAGGGATGCCTTGCA  
ACGGCAATTGGACGGGGAGAAGGGCTCCCTGTGCGGAATATATGGAGAAATCGTTGAAA  
TTGGCCGCTCAGAAGGCCGATCTCGAGTCGCAACTTCAGGATCTGAACGACAGATTCA  
AAGAAGAGGAGGATACGAGGAACAATCTGTTCCAAAATAAGAAGAAATTGGAACAGG  
AAGTGGCGGGCCTGAAGAAAGATATCGAGGATTTGGAACCTTAACCTGCAAAAGTCTG  
AGCAGGACAAGGCGACCAAGGATCATCAGATCCGTAACCTGAACGACGAGATCGCTCA  
TCAGGACGAGTTGATCAACAAATTGAACAAGGAGAAGAAGAATCAGGGCGAGGTTAA  
TCAAAAGACCGCCGAAGAGCTTCAAGCTGCCGAGGACAAGGTCAATCACTTGAACAA  
AGTGAAGATCAAATTGGAACACACTTTGGACGAATTGGAAGATTCATTGGAACGTGAA  
AAGAAATCACGGGCGGACGTAGAGAAGGCGAAGCGAAAGGTGGAAGGTGACTTGAA  
ACTTACTCAGGAAGCTGTCGCGGATCTCGAAAGGAACAAGAAGGAACTCGAGCAGAC  
CATACAACGCAAGGACAAAGAATTGTCGTCGTTGACGGCGAAACTCGAGGATGAACA  
GTCGTTGGTGGGCAAACCTGCAGAAACAGATCAAGGAGTTGCAGGCCCCGATCGAGGA  
ATTGGAGGAAGAGATCGAAGCTGAACGCGGCTCGCGAGTGAAAGCCGAGAAACAGC  
GCAGCGACTTGGCGCGGGAACCTCGAGGAACTAGGCGAACGTTTGGAGGAAGCTGGTG  
GCGCCACGTCCGCCCCAAATCGAGCTCAACAAGAAGAGAGAGGCCGAGCTTAGCAAAC  
TTCGAGAGACCTCGAGGAGGCCAACATCCAACACGAAACAACCTCTGGCCAATTTGC  
GCAAGAAGCACAACGATGCCGTTGCCGAGATGGGAGAGCAAATCGACACGCTCAACA  
AATTGAAAGCTAG

>novel\_circ\_001234

ATACAAAATTCTGTGCGCCAATGCCATCAAAGAGCCTTGCGACCCGCAAAAGGCGACC  
CAACTGATTCTGGACGCGATCAATCTGGAGCCCGAGTTGTATCGTATGGGCAATACCAA  
GGTATTCTTCCGTGCCGGAGTGTTGGGTCAGATGGAAGAGTTCCGTGACGAACGATTG  
AGCAAAATCGTGTCCTGGATGCAAGCCTACATCAGAGGTTACCTGTCGAGGAAGGATT  
ACAAGAAGCTGCAGGAGCAACGTTTGGCTTTGGTCGTGGTGCAAAGAAATTTGAGGA  
AGTATCTGCAAATTCGTACTTGGCCGTGGTGGAAGTTGTGGCAGAAAGTTAAACCTCT  
CCTCAACGCAACTCGTATCGAGGACGAGCTTGCCGCGCTCGAGGAGAAGGCGAGGAA  
GACCCAGGAGGCGCTCGAGAAGGAGGAGAAGCTGCGCAAGGAGCTCGAGGAGCAGA  
ACAGTAAACTCGTGACGGAGAGGGATGCCTTGCAACGGCAATTGGACGGGGAGAAGG  
GCTCCCTGTGCGGAATATATGGAGAAATCGTTGAAATTGGCCGCTCAGAAGGCCGATCTC  
GAGTCGCAACTTCAGGATCTGAACGACAGATTCAAAGAAGAGGAGGATACGAGGAAC  
AATCTGTTCCAAAATAAGAAGAAATTGGAACAGGAAGTGCGGGGCCTGAAGAAAGAT

ATCGAGGATTTGGAACCTTAACCTGCAAAAGTCTGAGCAGGACAAGGCGACCAAGGAT  
CATCAGATCCGTAACCTGAACGACGAGATCGCTCATCAGGACGAGTTGATCAACAAAT  
TGAACAAGGAGAAGAAGAATCAGGGCGAGGTTAATCAAAAGACCGCCGAAGAGCTTC  
AAGCTGCCGAGGACAAGGTCAATCACTTGAACAAAGTGAAGATCAAATTGGAACACA  
CTTTGGACGAATTGGAAGATTCATTGGAACGTGAAAAGAAATCACGGGCCGACGTAGA  
GAAGGCGAAGCGAAAGGTGGAAGGTGACTTGAACTTACTCAGGAAGCTGTCGCGGA  
TCTCGAAAGGAACAAGAAGGAACTCGAGCAGACCATAACAACGCAAGGACAAAGAATT  
GTCGTCGTTGACGGCGAAACTCGAGGATGAACAGTCGTTGGTGGGCAAACCTGCAGAA  
ACAGATCAAGGAGTTGCAGGCCCCGTATCGAGGAATTGGAGGAAGAGATCGAAGCTGA  
ACGCGGCTCGCGAGTGAAAGCCGAGAAACAGCGCAGCGACTTGCGCGGGAACTCG  
AGGAACTAGGCGAACGTTTGGAGGAAGCTGGTGGCGCCACGTCCGCCCAAATCGAGC  
TCAACAAGAAGAGAGAGGCCGAGCTTAGCAAACCTTCGCAGAGACCTCGAGGAGGCC  
AACATCCAACACGAAACAACCTCTGGCCAATTTGCGCAAGAAGCACAACGATGCCGTT  
GCCGAGATGGGAGAGCAAATCGACACGCTCAACAAATTGAAAGCTAG

>novel\_circ\_001237

ACCTACTCTGGCCTCTTCTGTGTAGCTATTAACCCCTACAAAAGATTCCCCGTATACACC  
CAAAGATGCGCGAAACTTTATCGAGGCAAAAGGCGTAACGAGGTGCCGCCTCACATTT  
TCGCCATTTCCGACGGAGCCTACGTCAACATGCTTACCAACAGCGAGAATCAGTCCAT  
GTTGATCACCGGTGAGTCGGGAGCCGGGAAGACCGAGAACACGAAGAAGGTAAATCGC  
GTA TTTGCGCCACCGTCGGCGCCTCGACCAAGAAAGCGGACGATCCAACCCAAAAGAA  
AGGCTCTCTGGAGGATCAGGTCGTTCAAACAAATCCTGTACTGGAGGCGTTCGGCAAC  
GCCAAGACCGTCCGTAACGACAACCTCTTCGCGTTTTCGGTAAATTCATCCGTATCCACTT  
TGGACCGTCTGGAATAATTGGCCGGTGCCGATATCGAGACATATCTGCTGGAGAAGGCT  
CGTGTATCTCGCAACAGGCTCTGGAACGCTCTTATCACATTTTCTACCAAATGATGTC  
GGGCTCGGTTTCTGATTAAAGGAAATGTGCTGCCTCACGAACGACATCCACGACTAC  
GTGTTTCGTCTCTCAGGGCAAGACAACGATACCAAATGTTGACGACGGCGAGGAGTGTA  
CTTTGACAGACAAATGTTGCTGTTGTCCAACAACATCCATGACTACTACTTTGTGTGCGC  
AAGGCAAGACGACTATCCCTGGCCTCGATGATGGCGAGGAACTTTTAATCACCGATACA  
TGTGTCTCTTGTCCAACAACATATACGATTATGTTAACGTATCTCAAGGAAAAATCACGA  
TCCCCAACGTGACGATGGCGAGGAATGTGTACTGACGGACCAAGCCTTCGACGTGTT  
GGGTTTTACCCAAGAGGAGAAGAACGACATCTACAAGATCACCGCCGCTGTGATGCA  
CATGGGTGGTATGAAGTTCAAGCAAAGGGGTCGAGAGGAGCAGGCCGAGGCCGATGG  
CACAGAGGAAGGTGAACGCGTGCCCAAATTGTTGGGTTGCGACTGTGCCGATCTTTAC  
AAGAACTTGTTGAAACCAAGGATCAAGGTCGGTAACGAGTTCGTCACCCAGGGTCGT  
AACAAGGATCAGGTCGCTTATTCGGTGGGCGCCATGTCGAAAGCAATGTTGACAGGT  
TGTTCAAATGGTTGGTGAAAAAATGTAACGAGACTTTGGACACGAAGCAAAAGAGGC  
AACACTTCATCGGTGTACTGGATATTGCCGGTTTTGAGATCTTCGAT

>novel\_circ\_001238

TTAATTGATGGTCGTGGGACAAAACGTAATGTGTTACGAAGTACAAGTACTGGTTCTTC  
AACTACTACACCAACACCAACTCATACACCTATTCTTAAAAATTCTTTAACTGATCCATT  
ATTGAGTCATTGTTTCTTTGATGGATCCGATCCTCTTTTACAATTTGCTAGAGAAGAATT  
AGATCCATTATCTAAATGGCTGCAGATGAGTGGGATTACTCTTGTATACTACTGGTAA

AAAATCTGTGGATACTGCAGAAGAATTAGTAGAACCATGGTCAGCAAGACGTACTACA  
ATATTGAATAAATACACAACATCAGAGAAGTTATCAATAGCTACCAGTTTTTTTACCAGGT  
GGTGAAAAAG

>novel\_circ\_001239

GTGGCCCTTTTGAAGAACAGCTTAACGCGTACAAGAATAAAAGTTTCTGCTGCTATCG  
AAAATTTCAACTCATACTACGAAACATACGTGGATTACGATCCAATGTTTGTACAGCCA  
CAACCTTCCAATCCATGGATTACCGACGATCAAACATTTTGGCAGCTAAACAGTCCTCT  
AGTGGAATTCCTACGGAAAAACGTGTAAAGCGGTGGGCATTATCCATGGAGGAGTTA  
ATGTCCGATCCTACTGGTTTGAAGAATTTACGCAGTATTTGAGAAAAGAATACAGTCA  
TGAAAATATACGATTTTGGTTAGCGGTTAAAGATTTGAGGCATAGTTTTCAAGCAAAAA  
TACCCGACAAAGTTAACGAAATCTTCAGAGAATTCTTAGCACCCGGAGCACCTTGCGA  
GATAAATATAGATGGGAAGACGATGGAAAAGGTTTCATCAAGAGATGAAAAATCCAAAT  
CGATTCACGTTTCGATTCGCGCGCTGAACACGTGTACACGTTGCTTTTGAAAAAGGATTG  
TTATCCTAGATTTATTCGTTCCGATCAGTATCGAAATTTATTAGCCTCTGGTGTGCAACCT  
TCGCAAAAAAATGGTTTTTTTTTCGGGGGACAAGCGAAAAAGAAAGTTTCTTCGACTT  
CGACTTCGATTTTCGGCCCCAACTCCGACAACGAGCACGTTGCAACATCATGCTGTAAC  
CGCCGCGGGGGAGGAGGGAGTGGAGGTGGTAGTAAACGAAGGGGAAGCGATCGAA  
GCCTTTCCGGATCTGCTCACGAGTTAGCCATTTGTGGTATTCGAGATACAAGTTTCGATG  
CCTAGAGTACCGCATTCTCACAGTCAGTCGAATCTCACCGATATTCATATAGGGGAGA  
TCTGGCTCGACTCGTAAAGATTCCAACAAGGCCTATCCCGCATAACGTTTCAGGATGCTG  
GCGCATCGGAAACATCGACGGCTCGCCCTATGGACGACGTTTGCCCGTGGGACGTGGC  
TCCGGGGCCGAGTGTAGAGCACGATATAGATGCGGGCGCGCAGCTACGCCATCCAATAT  
CATCTGGAGTGACGTTCGTCGGTTGAAAGCCAAGCGGAAGAAGGAAACAATAACTTGA  
TTAGCCAGTCGCATTCCATCGAAGTTGCGGCACGCCCCTCTCGCAAAAATTCATCGCAA  
TTCGACTCCTGTAGTTCTTCATCGGACGTGAGCTTGCCCGTCACGGAAGCGGTATCGG  
AACATCTTCGAAAGTCTTGCAGTTTGCAGCAAAGCAGCAGCACAGGTGGGACGAGTA  
CCTCGGAACGAATCGGTATGACGACGCGGAATTATTCGATCGGCTCGGTTCGGCGGAAG  
GGCGAAACTTGGAGAGATCGGGCGACCGTCGGCTTCGTCCTTCAATTATCCGTCGCCG  
CAGCATTCGTTTGAATACTCGCACGTGGTGACGGAGATCCGATCCGAGGGGAAGGAGA  
TCGCCGAGGTGGTTCGAGACCGAGACGAGGTCAAAGGTCACGTTGGTGGAGAAGGAA  
CACGCGAAGAAAACATTGAGCAAGGCCCCCTGATAAGCATTAGCGCGATCGTGGGCG  
ATCTGGCGAGCGATAGCTTCGCGGTTCAAGCGGAGGAAAGGAAGGAGGACGATTGCG  
GCAAAGGTGTGGCGGCGGTTAAGGAAGGGGAGGTGGAAATTGAGAAAAGGAAAGGG  
GAGGTGGAGGGTGATAAAGGCGACGCGATGGTCGCGGAAGAAAATTTGGCGATTTCG  
ACTCGAGTGGAACGGAGACGGAGGAATCGCTGGAGGAGGCGCAAGTCGTTCTCTGTT  
TGGGAGCCGGACACCCGACAGGACGACCAATAGCACCCGTTACCCAACCAGCTCCT  
CAACAAAAGCGTGACAATAACGTTAACGAAGTGTGCCCGTGGGAAGACGA

>novel\_circ\_001240

GTGGCCCTTTTGAAGAACAGCTTAACGCGTACAAGAATAAAAGTTTCTGCTGCTATCG  
AAAATTTCAACTCATACTACGAAACATACGTGGATTACGATCCAATGTTTGTACAGCCA  
CAACCTTCCAATCCATGGATTACCGACGATCAAACATTTTGGCAGCTAAACAGTCCTCT  
AGTGGAATTCCTACGGAAAAACGTGTAAAGCGGTGGGCATTATCCATGGAGGAGTTA

ATGTCCGATCCTACTGGTTTGGCAAGAATTTACGCAGTATTTGAGAAAAGAATACAGTCA  
TGAAAATATACGATTTTGGTTAGCGGTTAAAGATTTGAGGCATAGTTTTCAAGCAAAAA  
TACCCGACAAAGTTAACGAAATCTTCAGAGAATTCCTAGCACCCGGAGCACCTTGCGA  
GATAAATATAGATGGGAAGACGATGGAAAAGGTTTCATCAAGAGATGAAAAATCCAAAT  
CGATTCACGTTTCGATTCCGCCGCTGAACACGTGTACACGTTGCTTTTGAAAAAGGATTG  
TTATCCTAGATTTATTCGTTCCGATCAGTATCGAAATTTATTAGCCTCTGGTGTGCAACCT  
TCGCAAAAAAATGGTTTTTTTTTCGGGGGACAAGCGAAAAAGAAAGTTTCTTCGACTT  
CGACTTCGATTTCCGGCCCCAACTCCGACAACGAGCACGTTGCAACATCATGCTGTAAC  
CGCCGGCGGGGGAGGAGGGAGTGGAGGTGGTAGTAAACGAAGGGGAAGCGATCGAA  
GCCTTTCGGATCTGCTCACGAGTTAGCCATTTGTGGTATTCGAGATACAAGTTCGATG  
CCTAGAGTACCGCATTCTCACAGTCAGTCGAATCTCACCGATATTCATATAG

>novel\_circ\_001243

AATGGTATATGTGGCGATGTTATGAACCATATGGTTGCTTTTATATTGGTTCACCATGGTC  
GGGAGAACATAGACCAGTATCAACATTTCCAGATCGTCCGGACTCTATAAATCCTCGTT  
ATTTACTTTTATATTCGTGAAATCATAGAACAACCGCAAGAATTGAAGATAGATAAAGAC  
GAAACTATTCATGATTCAGCTCTTAAAAAACAGAATAATCTTTATCTTATCGTTCATGGA  
TTTCTTGATAATGGTGACAAAACGTGGGTATGAGAACTATGAAAGAATTACTAGAAAA  
AGAAGATTGTAACGTGGTAATAGTGAATTGGATTGCTGGTGCAGGTCCGCCATACACTC  
AAGCCGTGGCCAATACAAGATTAATCGGTGCAATGACAGCTCGTTTAGTTTATCAATTG  
ATTGAAATTGGAGGAATAAATCCTTTGAAAATGCATTGCATTGGACATAGTCTTGGTGC  
ACATACTTGTGGCTACATTGGATACACTTTGAGGAAAAGATACAAATATAATCTTGGAA  
GAATTACTG

>novel\_circ\_001244

AATGGTATATGTGGCGATGTTATGAACCATATGGTTGCTTTTATATTGGTTCACCATGGTC  
GGGAGAACATAGACCAGTATCAACATTTCCAGATCGTCCGGACTCTATAAATCCTCGTT  
ATTTACTTTTATATTCGTGAAATCATAGAACAACCGCAAGAATTGAAGATAGATAAAGAC  
GAAACTATTCATGATTCAGCTCTTAAAAAACAGAATAATCTTTATCTTATCGTTCATGGA  
TTTCTTGATAATGGTGACAAAACGTGGGTATGAGAACTATGAAAGAATTACTAGAAAA  
AGAAGATTGTAACGTGGTAATAGTGAATTGGATTGCTGGTGCAGGTCCGCCATACACTC  
AAGCCGTGGCCAATACAAGATTAATCGGTGCAATGACAGCTCGTTTAGTTTATCAATTG  
ATTGAAATTGGAGGAATAAATCCTTTGAAAATGCATTGCATTGGACATAGTCTTGGTGC  
ACATACTTGTGGCTACATTGGATACACTTTGAGGAAAAGATACAAATATAATCTTGGAA  
GAATTACTGGCCTTGATCCTGCTGAACCGCATTTTCAGCAATACGTCCACAATGGTTCGA  
CTTGATCCAACGGATGCCACTTTTGTACGGCTATTCACACCGATTGCAATCCTTTTATC  
AACTTAGGACTCGGTATTACTCATCCTGTCGCTCATATCGATTTTTTCCAAATGGAGGT  
CGCAATCAGCCTGGTTGCAATGAAGGTGTATTGAATTCTATCACTTTAGAACGTGGAAG  
TTTCTTTCGAG

>novel\_circ\_001245

AATGGTATATGTGGCGATGTTATGAACCATATGGTTGCTTTTATATTGGTTCACCATGGTC  
GGGAGAACATAGACCAGTATCAACATTTCCAGATCGTCCGGACTCTATAAATCCTCGTT  
ATTTACTTTTATATTCGTGAAATCATAGAACAACCGCAAGAATTGAAGATAGATAAAGAC

GAAACTATTCATGATTCAGCTCTTAAAAAACAGAATAATCTTTATCTTATCGTTCATGGA  
TTTCTTGATAATGGTGACAAAACGTGGGTATGAGAACTATGAAAGAATTACTAGAAAA  
AGAAGATTGTAACGTGGTAATAGTGAATTGGATTGCTGGTGCAGGTCCGCCATACACTC  
AAGCCGTGGCCAATACAAGATTAATCGGTGCAATGACAGCTCGTTTAGTTTATCAATTG  
ATTGAAATTGGAGGAATAAATCCTTTGAAAATGCATTGCATTGGACATAGTCTTGGTGC  
ACATACTTGTGGCTACATTGGATACACTTTGAGGAAAAGATACAAATATAATCTTGGAA  
GAATTACTGGCCTTGATCCTGCTGAACCGCATTTCAGCAATACGTCCACAATGGTTCGA  
CTTGATCCAACGGATGCCACTTTTGTTACGGCTATTACACCGATTGCAATCCTTTTATC  
AACTTAGGACTCGGTATTACTCATCCTGTCGCTCATATCGATTTTTTTTCCAAATGGAGGT  
CGCAATCAGCCTGGTTGCAATGAAGGTGTATTGAATTCTATCACTTTAGAACGTGGAAG  
TTTTCTTTCGAGGTGAGTTTTTTTTTTTATTTTTCTTTTTTCATATATTTTTATATATTTTTTTTT  
TGTTTTATGATTAATACTACTTGTTTTAATATTTTATTGTAAATATTTATTGTAAATAAAGTATA  
TATGTATGTATAATATTAATAATTATTTTAAAAAATACATTTTTTAATTTGATAATCTTGAA  
ATATATTGTCAAAAACAATATTTTAAATATTAATTTTTCTATATATATAATCATCGTTTATA  
ATGTGATATCAGCCTCATATTTAATTTTATTATATCTGTTATATTATTTATTATATTTTTTCAT  
TTTTTTATGTTATAAAAAAATTTTAAAGAAGTTCTATTGGAAAATAAAATAGAAATTTTT  
CGCTAAATAAAGTCGTTTATATAATCGTCAACTGTTCTAATATTTATATTTTCAGTTAATA  
AAATCACAATTGTCATATATAATGTCACGAACGCATCACGTATTAAGCAGAATTCAATAT  
AGTAAAAACTATTTGCAAATGATTGCAAAATTAAGATCGATTATTGATTAGGTGTAAAA  
AAAAAGTTATATTTTATGGCCATTGAAATCGGCGAACTTCATTGATAAATTGATCTAATT  
GATAATTATTATTCAATAATATTATATATATTATTATATATATTGTTATAATAGTATATAATAAT  
ATCGGAAAGAATAATTGTCTATACAGTTTTGCAATAATTTAATTTGTTTTTACTTTTTAAA  
ATAGGATTAGTGGAATTAGCAAAATTTATGTCCTTTAATTCACCTCTTTTCTTTCTTATTT  
TTCTACTTTAATATATTTTCTATAGTGTTAATAATATTGATATTAGAAAAATTAATATAATA  
TTTTTAAAAATATGTATTAACAATAATATCATGTATAATATTGTTAAAGTCTAAACTGAAT  
GATTTTGAATATTATACAAAACCTCAAAGATGCTTGAATTGATGATATTACTCGAAAAAT  
CATTTAGTACTGTTCTGTATTGTACTATCTGAAGAATCATCTAAAATTGTACAATTATTTG  
TATTATAAATTTGAAGTGAACGATAATTTATTTTTAACTATTTATAAGTACTGATTGGCGA  
CTAAATGTAATGCTATTCTAATTCTACTCTATTGATATGAAATGAGTTCTATTTGCTGAAT  
TCTATTTTATTCTATTGATTGATCTGATCTGAAAGACTGTCGTAGGCCTTGGTGTTTCAAT  
CATTATTTTCTGAAAATTCCAAGAGGGATTTAGGGGAATTAATCGCATTAAAGAATAATT  
TCAAAAGATGGCCTCTCGCTTCGCAGTGTACAAGAGTTTGCGATCGCTCCATTACAAAA  
TACTACGTGCATAAGTGTAATGTGTGATCATTTCCATTTTGATTGTTGTGAAAATCTGGA  
AAGCATTAGAGATCTGTTCTCAATTGTAAATTATTGCTAGACTATTGAAAATGTTCAAAC  
CATTA AAAATAAAAATCCAAGCTGTCTGACTGCTTCAAAAATGTTGATTTTGTGCTTAAC  
AGATATAAAAATATTTTTAGATAATCATGAAATTATCTTCATGTATGTACATTATTGTACAT  
ACATATTTTATTATCAATTTATATAAAAATATGCGATTTTATCAATTATTAATATATATATAT  
ATATATATATATATATATATATATATATATATATATATATATATATATATATATATATATAT  
ACTTGAAATTAAGAAGCAAATGCCAGATTATATAACTCTTTGCACTCCAAGTCTGTTTC  
GCTCGCTCGAACTCCAGACGATTGAACCCGCGCATTCAAGTGTATTCAATTGCGTTCCGGT  
GGAATTTCTTACAGATAATTTATGATTTTATATACAAATTAATGCATAAAATTTTTATATTT  
TAATATTTTATATATCTTTACATAAAGGAAAAGAAATTATTGAATATTAAAGTCTATATTGT  
TGTTTTGTGCGTTATTGTATGATTATTAAGATGCATCCTCGGTTTGTGAGGGCAAGTAGA  
GTAGTACTTTTTCTTCTAATTTTTTTTATTGCATAATTATTTATTTTGTGCACTATTTCAATTA

TAAATTCATTAGTAAAAAATAGTTTAAAAAAATCTAACGGTTCATTTATATTCGAAGATA  
CTTGCGGTCCTGCAGATTTTTCGTGCGGATACAAATTCTATTCTTCGCGGTATATTTTCCGA  
TTCTATACATATTATCCATTTGGAATTTTCTGTATCTTCTGCTTATATAATATCTTGACTACA  
ACTATTGCTTTCACATTCACTATCTATTATTCTTATTTTTCGCCTTCTTATATCTTATCTC  
ATTTCCATATTCATGGTTTTCTCTTTCATTAATTTCTTTATGAATAGAAGCAATTTCAATAA  
CGAAAAATCAAACCTCATCTTCATTTGAACTAATTTTATTAACCTCATTTTATGCTTACGAA  
ACTCAAAAACCTTTAAAAATAATATTTCTATTGTCATGATGTCAAACCTCAGATTAATGCCA  
AAAATATCGTTTGACTCACAATCACGGTCTAATTTGAGATAAAAAAATCTAACCATTTAA  
TAATATATTATTCTACATCTTATAAGACTATAGATAAAGAGCTTAGAATCCTATTATGGAA  
CGATATTCTAAAAAAATCAAACATAAATAAATATTGTCGCTGTTCAATGCCGCATCAATC  
CAAGTGATGTCGGAGAGTCATCACTGGAGTTACGGCATTAACTCAAGTGGTGACCAAG  
AATCACCGTTGAAATGCAAAAGGTTAACAAAATATTATCAATATAATAATAATTTAAATA  
ATAAACAAATTTTCAATTTCAATTATTTTTAAACATATTACAAAAATATTTAAAGATCAAT  
ATTTAAATTATTTAAACAACCTTTACTAAACACATTAAACAACCTTTATTTAAACATATATACA  
CACACACACACACACTCACATAATCGCTCGTATTATTACAATGAATTCTGCCTATACGTA  
TGCATTATGACATAAATTATTTTACAGTGTTATTGGTTATTTTACAGTGACCGGATAAAA  
TAGGTCACCCAAATCCAATTCTTATCTTTGTTTATAGTTTATATAAACTGAGGTTGGATG  
AACTTACTATTAATCCAATGAGGCGCAGTAGATATAAACAAGTGCACGTGATCGACGTA  
TGGACAAGACAGGACCGATTACAGATTCCAGATTCTGCGAATTAGGAAATAAGAAG

>novel\_circ\_001246

ACACTAAAGCAAAATACAGAACCGGCAAGTAGTAGTGGAATTGATGTCCAGAAATCAA  
CCGAGCCAAGAAAAAAGAATCTGTATCAACACAAACTCAAACCTTCTTCAATCAATCG  
ATTAACAAGATTTAATCATCAAGAAAATTCCAATTTATCTTCTTCATTGCAAAGTGGTAG  
TATAAATAAAACAAAAACATCCAATGTTGGTGTGGATCTTCAAACATCTCCTCCTTCTC  
CATCTCCATCTTCAAGACGACATCATCATCATCATCATCATCATAATAACAAACA  
TTATAGGCATCATGATGTGCTTACAACACGACGTCAACATAATCATTCTCAAGATTCTGG  
TCGATCTAGTGATAGTTCTGTCTCTCACAGTCGTACATCTTTAGAATCAACTGGATATCG  
ATTATTGGATTCTCCACATCGACATCATCATCGTTCTGTCACTCAGACATCGACAAGTCA  
AGTACAATCTTCACCCAGGCAACATAGTGGTACATTGGAAACTAGGGGACACAAAAGT  
GGTACTTTAGAAAGTATAAAAAATCAGAAATCAGTACCATTGGGTGAACCACCTCCATT  
AGGTTTGTCACTTTCAACTAGTACTCCTCTATTTAAAAAAAAGACATTTGTTGATTAC  
AACGGGAGAACAGAATTGGAAATTTAGAATTGGAAAAGAATAAAAAATGGTAGAGAAA  
GTAGTAGAGGTTTCATATGGTCCTGAACCAAGTACTTCTCCATATCGTGATTCAATTGATG  
AATCTAGAATATTTAGACATGAAATGCCTCCATATCGTCCACCAGAAGTTCAATTGAGTC  
ATAGTTATAAATCGCAAGGTGAAAAATATGGCTCCCTGGTGGAAAGTAGTAATCGTTAT  
CATAGAGATAGAGAAAGGGAAATTCACCATAGAGAAAGAGTAAATAGTTTGGACAAAA  
CAAATACTTCAGCCTTTTATCCAAGTTCCATACATCCGCGCAATATGAATAAAGATAATA  
CTGGTAGTGTAGGAAGAAGGCATCATGGATGTTCAGTATCACTTTCAGAAGCGAATGTT  
AGAGATATGTATAGTGCAATGTTAGTTGAAAGAAATGAGCCTTCTAAGAGTCTAGTTAG  
AGGTACAAGCATAATGAGCAATACATCAAAGCAGAGAAGTCTCGAAGTTATGGAACGA  
GAAAGAGAACGCGAACGTGATAGAGAAAAAGAATATAGAAGAAACACAGCTTGTAAT  
AATTCATTGGATT

>novel\_circ\_001247

AACTAGTGCTTGCAGAGAGGGTTAAATTCCAGGGTGGCGGGCTTCGTCAGCAGGAAGC  
GGCGAGTGTGCGGAGCAGTAGCTAGTGAGAAGGAAAGAAACGATAACGAAGAAGA  
CGAAGACGACGCCGTCGGGGAATAAGTGTGCAAGGGTGGCGGCGGAGGTGACCCGC  
AGGAGGTGGCGGCGGAGGAGGGTGGTGGTGACTTTGGAAAAGACGACTCCTGCGAC  
TTGAGTCGCGAACCGTGGTTGGTGGTGGTAGTGGCCACGAAAAGAGTAGAGTAACCG  
TTTTCTGGCCGACGAGGGAAAAAACAGAAGCTTGGTGGTGGCGTTTGTGAAAGCAAC  
TTGTGGCAAGATGGGCTGCGCCATGTCCGCGGAAGAGCGGGCCGCATTGGCTCGTAGC  
AAACAGATCGAGAAAAATCTAAAAGAGGATGGTATTCAAGCCGCCAAGGATATCAAGT  
TGCTATTACTTG

>novel\_circ\_001248

AACTAGTGCTTGCAGAGAGGGTTAAATTCCAGGGTGGCGGGCTTCGTCAGCAGGAAGC  
GGCGAGTGTGCGGAGCAGTAGCTAGTGAGAAGGAAAGAAACGATAACGAAGAAGA  
CGAAGACGACGCCGTCGGGGAATAAGTGTGCAAGGGTGGCGGCGGAGGTGACCCGC  
AGGAGGTGGCGGCGGAGGAGGGTGGTGGTGACTTTGGAAAAGACGACTCCTGCGAC  
TTGAGTCGCGAACCGTGGTTGGTGGTGGTAGTGGCCACGAAAAGAGTAGAGTAACCG  
TTTTCTGGCCGACGAGGGAAAAAACAGAAGCTTGGTGGTGGCGTTTGTGAAAGCAAC  
TTGTGGCAAGATGGGCTGCGCCATGTCCGCGGAAGAGCGGGCCGCATTGGCTCGTAGC  
AAACAGATCGAGAAAAATCTAAAAGAGGATGGTATTCAAGCCGCCAAGGATATCAAGT  
TGCTATTACTTGGTGCCGCGCAATCTGGAAAAGTACCATCGTTAAACAAATGAAAATT  
ATTCATGAAAGCGGATTTACACCTGAGGACTTTAAGCAGTATAGGCCCGTAGTATATAG  
CAACACGATACAATCTTTAGTCGCTATTCTCAGAGCGATGCCAAATTTGGACATCAACT  
TTTCGACCAATGAGCGAGAG

>novel\_circ\_001249

TTTTCTGGATGATTTAGACCGATTAGGAGCAAGGGATTATCAACCTACGGAGCAAGATA  
TTTTAAGAACTCGTGTCAAAACAACGGGCATAGTGGAAGTCCACTTTTCCTTCAAGAA  
TCTTAATTTCAAATTATTTCGATGTAGGCGGTCAAAGAAGTGAACGTAAAAAATGGATCC  
ATTGCTTTGAAGATGTCACTGCGATCATATTTGTGTGCGGATGTCTGAATATGACCAAG  
TTTTACATGAAGATGAAACGACG

>novel\_circ\_001250

CTAGGCAGTGAGATCGACTTAAGCACGAAACAAATTGCCAATATAAATGATGTTTGCGA  
CAGTATGAAGGAACAACCTTCTTGTCTTGGTTCAATGGGCTAAATACATACCAGCTTTTA  
GTGAGTTAACCTTGACGATCAAGTAGCCCTTCTGAGGGCACACGCAGGTGAACATCT  
ACTCTTAGGTGTTGCTAGACGCAGTATGCAACTTCAGGATGTTCTTCTTCTTGGAATA  
ACTGTATCATCACCAAAACTGCCCTG

>novel\_circ\_001251

CCGTACAAAATGAAAGGGATCGTATAAGTTGTAGAAGGCCAAGTTACGAAGAACAAA  
GTAACAATGGAAGTGGACTCTCTGTTGTTTCTTCTTCAAGCAGAAATGCTCAGTAGA  
CAAGTTGCCTCTCTTGAGCTAGGCAGTGAGATCGACTTAAGCACGAAACAAATTGCCA  
ATATAAATGATGTTTGCGACAGTATGAAGGAACAACCTTCTTGTCTTGGTTCAATGGGCT

AAATACATACCAGCTTTTAGTGAGTTAACCCCTTGACGATCAAGTAGCCCTTCTGAGGGC  
ACACGCAGGTGAACATCTACTCTTAGGTGTTGCTAGACGCAGTATGCAACTTCAGGAT  
GTTCTTCTTCTTGGAATAACTGTATCATCACCAAAAACCTGCCCTG

>novel\_circ\_001252

ATTTAGTAGAAATTGTATAATAGACAAAAGACAAAAGGAACCAATGTAGATATTGCAGAT  
TAAGAAAATGTTTCAAGGCTGGCATGAAAATGGAAGCCGTACAAAATGAAAGGGATC  
GTATAAGTTGTAGAAGGCCAAGTTACGAAGAACAAGTAACAATGGAAGTGGACTCTC  
TGTTGTTTCTCTTCTTCAAGCAGAAATGCTCAGTAGACAAGTTGCCTCTCTTGAGCTAG  
GCAGTGAGATCGACTTAAGCACGAAACAAATTGCCAATATAAATGATGTTTGCGACAGT  
ATGAAGGAACAACCTTCTGTCTTGTTCAATGGGCTAAATACATACCAGCTTTTAGTGA  
GTTAACCCCTTGACGATCAAGTAGCCCTTCTGAGGGCACACGCAGGTGAACATCTACTC  
TTAGGTGTTGCTAGACGCAGTATGCAACTTCAGGATGTTCTTCTTCTTGGAATAACTG  
TATCATCACCAAAAACCTGCCCTG

>novel\_circ\_001254

TTATCATTTTCACCAACAACACCTGGTTGGAGTCATGCAAGGCTTCTTGGACTTCTAGC  
AACTATCCTTGCAGTATCTTCCTTCATGTTACTTCTATGCACAGCTGCAGCATTCTTCTTC  
GTTTCTTTCAATACTTTTGTCTTCACTGCAGCTGAGTGTATTCTGTTAGGTGTCAGAACA  
ATTCATGTTATGATACGATATATCATTCATTTATATGATACTCGAGGAGCTGGAACCTCCT  
CACAACGTTCTTGGGATAAAAGGGGTCTTTAACATATTATACAGATTTAGCAGCAGAA  
TTAATAGTGCTAGCTGTAGATTTCTTCATCATGTTTCATATGCTACTTTGGAGTAATATAT  
TTCTAAGCATGGCATCCCTTGTAATTTGTATGCAACTTAGATATCTTTTCTATGAGATACA  
ACGCAAAATTACAAAACATAGGAATTATCTTGCTGTTTTAAATCATATGGAACAGAACT  
ATCCAATGGCAACTCAAGAGGAATTAGCAGAAAACCTCGGATAATTGCGCTATTTGCTGG  
GAGAAAATGGAAACAGCTCGAAAGTTACCTTGTGCTCATCTTTTTCACAATTCTTGTTT  
ACAATCTTGTTAGAACAGGATACTTCTTGTTCAACTTGTTAGACTTGCTTTAAGCATGC  
AACCTAACCACCGAGAAAACACACAAGAATTACAAAATGAACCACAAACACCAGCTA  
GACGGAATGAAAATCATTTCTTTTCAATTCGATGGCTCAAGATATGTATCTTGTTTACCGA  
GCTTCTCTGTTGAAGTTTCTCATAACAGATTGCGTGGAATATTTCTACTATTACACATA  
ATAATTCGCAAATGGATGCTATGATTAGACAG

>novel\_circ\_001255

TGTATTCTGTTAGGTGTCAGAACAATTCATGTTATGATACGATATATCATTCATTTATATGA  
TACTCGAGGAGCTGGAACCTCCTCACAACGTTCTTGGGATAAAAGGGGTCTTTAACA  
TATTATACAGATTTAGCAGCAGAAATTAATAGTGCTAGCTGTAGATTTCTTCATCATGTTT  
ATATGCTACTTTGGAGTAATATATTTCTAAGCATGGCATCCCTTGTAATTTGTATGCAACT  
TAGATATCTTTTCTATGAGATACAACGCAAAATTACAAAACATAGGAATTATCTTGCTGT  
TTTAAATCATATGGAACAGAACTATCCAATGGCAACTCAAGAGGAATTAGCAGAAAAC  
TCGGATAATTGCGCTATTTGCTGGGAGAAAATGGAAACAGCTCGAAAGTTACCTTGTG  
CTCATCTTTTTTACAATTCTTGTTTACAATCTTGTTAGAACAGGATACTTCTTGTTCAA  
CTTGTTAGACTTGCTTTAAGCATGCAACCTAACCACCGAGAAAACACACAAGAATTACA  
AAATGAACCACAAACACCAGCTAGACGGAATGAAAATCATTTCTTTTCAATTCGATGGCT  
CAAGATATGTATCTTGTTTACCGAGCTTCTCTGTTGAAGTTTCTCATAACAGATTGCGTG



GAAATATTTCTACTATTACACATAATAATTCGCAAATGGATGCTATGATTAGACAGGTGC  
AGCAATTGTTTCCACATTTTCCGCGTAATCTAATTGTAGAAGATCTCAGAATGACCAGAT  
CAGTTGAATGGACTGTTGAAAATATATTGGATGGGGTGCTAATATCTCCTCATCGTATAA  
TCGAAGAACCACAATCGGAATCCGTCCTTCAAATCCATACCAGTACTACTGAAACTAGT  
GTTTCTTTAAATAGCCCTTCAGCACCATATCTTCAGATCCAAGATTTGATATTCCTCTG  
GCTGATAG

>novel\_circ\_001256

CAGAAGTATGTTCTGATAGACTGCAAGCAAATAAAAAAGCTAGAGTTTCAGGAATTGT  
AATAAATACTTGTGGTTGGGTAAGGAGCTGGATATAAATTATTGACACATGCTGCTC  
AAGCTTTTGAAGTTGATGCAATTCTAGTACTTGATCAAGAAAGACTCTATAATGAACTT  
GTTAGAGATATGCCAGACTTTGTTAAA

>novel\_circ\_001257

TGATGAATATTATGGTGGCCTATGGGCAACATTTAATTTTGATGGTCTACAGAAATGGAT  
AGAGGACCTAAAAGTTTCCAAAAATAACTAAATATGTATCTGAAGTAGATTTAGAAT  
CTGAAGAAAAGTTTTTAGAACTAGTAATGAATATTCGACTGTTGAAAATATTGAGGAA  
ACTTGGTATATTTCAAATGATGCTGATCTACCAGTAGTGTCTTCAAAAGATACTCAAACA  
GATAGTATTGGAGATGGTAGTAGTAGTGGTGATGAAAAAGCAGATGACGATAAAGTTG  
AAAAAAAAGAAAATGTAAAACAATGGAGTATAGATCGTATAAGAAAAGAATACAGGA  
AGTTTAATATTGACTTAGCACCAAAGTTGTTATTTGCACGAGGTGAATTAGTTGAGCTTT  
TAATCTCCAGTAATATTGCTCGCTATGCGGAATTTGCGGCAGTATCCAGAGTAGCTACAT  
TCATGGATGGGAACTGACACAAGTACCTTGCTCAAGAGCTGATGTATTTGCAAATAA  
AACTGTTAGTGTTATTGAGAAAAGAATGTTAATGCAACTGCTCACTTCATGCATGGAAC  
AAGGAGCTGATAGTCCAGAATTCGATG

>novel\_circ\_001258

AGAAAAAAGGGTAGAAAGCATACGCATAGAACGTGTTATGAAATTGTTGCCGTCGATT  
CAGCTGCCGCAATTACCGCCGGTTTCGGCCGGGGGTGGAATGACGGGAATGGACTCTC  
GGCTACCACCCGGTATATCTTTACCTTTTAGTCCTACTGAGCTACTCTGGCGATACGGTC  
CCGCTATGAATTTTCCACCGACTCACCCGCCACCAAGTCCCTTTCTAGATTTCAAGACG  
CACCTACCGGCAAGTTTGGCTTCAGACCCACGACTGTGGTCCCGCGAGGATGTGACGA  
CGTTTCTTCGATGGGCTGAACGGGAGTTCGATCTACCCCAATTCGATATGGACATGTTT  
CAAATGAATG

>novel\_circ\_001259

GTAAGTAGAACGAACGTGTTGCTCGACGAGCCACCCCTCCATCCCGATTTCCAGTACTC  
GTGTGAGAAATTATCGGATTTTAATTACCATCCGTACGAATACGAGGATTGAAGTTGGC  
AGCACTGAATCCACATCTCTTTGCGGTGTTCTTGCGGTGCGCGAGTCAATATCAACGGT  
AAAAATTCCTTTGTTAAAACGTTGAAGAAGAATTGTTTCAGAATTCATGCAGCGGAACGA  
GTATTCCCGGCAGAATCTGAAGTATTCATCGGGATGATAGAATTTTACTGAGCTTTGAA  
ACATCGGGAGTTACATCGGTGGAAGCTTTTAATTTCTGCATTG

>novel\_circ\_001260

GTAAGTAGAACGAACTGTTGCTCGACGAGCCACCCCTCCATCCCGATTTCAGTACTC  
GTGTGAGAAATTATCGGATTTTAATTACCATCCGTACGAATACGAGGATTGAAGTTGGC  
AGCACTGAATCCACATCTCTTTCGCGTGTTCTTGCGGTGCGCGAGTCAATATCAACGGT  
AAAAATTCCTTTGTTAAAACGTTGAAGAAGAATTGTTCAGAATTCATGCAGCGGAACGA  
GTATTCCCGGCAGAATCTGAAGTATTCATCGGGATGATAGAATTTTACTGAGCTTTGAA  
ACATCGGGAGTTACATCGGTGGAAGCTTTTAATTTCTGCATTGGTACGTGGGGATACAT  
AGGTAGAATATAATTTTAATACACGTGGTATAATGGCAGATATGTTCTGAATATTTTATTT  
CGATATCTTTTCGTCATGGGAATGATATAATTTTAGTGGAATTTTAGTTTGGAGAGAAA  
ATTATTTCTATATTTTCGTTGTAAGTAATTAATGATTTAAGAAATAAAAGTTTAATTGGAT  
TATATGATTATGTAAAATAAAATAGATTAATATTGTTTTTCCCTATAATTAATCGTATATTTT  
ATAGTGATTCCAAAAATTTTTTATTATATTTTCTTTTGTACAATGTTAATGGAAGTAACAG  
TATATAGAAGAAAAATTCTATGATGTTTTGTTTATCAATGTTTTGTTAATTAGTGTAATAA  
ATGTAATGAAGAATAATTCAAAGGAAAAAATAGATATGTAAATATAAGAAATATGGAAA  
TGTTTTTTTTTTTATTATTAAAGATAAAATGTGCTGTGTAAACATATATATCGTAATTTTA  
AACAAATTTGTGATTTTTTATATCTTTTTTTAAATTGGATAATACGAGAATGACATGAAAT  
ATAAACTTTAAGATAAATAAATTATGAAATTACATTCAAGAATGTTAAATACAAATATG  
AATACAATTATAATAATGTAGCCATTAATTAATAAACAATTGAAATCCATTTTATCAGT  
AAATAAATTTCAAATGTTTCATATTATTCTCCATTTTATTCTTGTTATTATACCAAAAATA  
AAATAATGTATTTCAAATTTCTCTTACAATTTCAAATTAATAATCATTATATAATAACTTAT  
ATATATATTATATATTATTTCTTTCTTTTAATTTTTTTTTTTTTTTGAATAGAAACATACGTT  
AAAAACATACGTTCTTGTCACAATTGAAAGAAGAAAATTTTCATCGAGCAAAAGGTAT  
TACGAAATCATAATATCATTTTGCTTCGAATTTAATCAGTTTTTAAGAATCTCGTTGTA  
CATTTCAAATCTAAATCGTATTTACATTCTATTGACAGATCTATATGGTTAAATCCCGA  
AACAGAGGAGAAATTACAGATCTGTAAACGTTTACGAATGATTTCAATCGAAACTTCA  
CAAAGGTTAGTTCAGTTATTACCGAAATTGTGCCAAGTGCAAACATTATCTCTTGACCC  
TCGAAAGCTTCGCGCTAATTGGCAACATCCAGGGGATGAATGCTACCCCCCTTCCCCCT  
CCATCTCCCCCTCCCCCTTCTCTGATCAGACTCTGCCTACAGTGGGGTTTTCGAGGATAAT  
AATCGAGAGGCGCACAACTGCACTGGACAGCTCGTGTACTCGCCGCCCTTTTCTCTA  
TGAGGCTCTGTGTTTGCACCAGCCACGTATTTCCCATGTGACCCGTGTGCATTTCTGTG  
ATAGGTCACCCTACAAATCGTCGATCGTGTTACTC

>novel\_circ\_001261

GAAGGTGAGAGGGGATACTTAGAGGGGCTGGCTTCAAGGTATGCAGACCTCTTCAGA  
ACGCATTACGGAGACGTCCTGGAACCGCTTGAGGAGCTACGCCGCCGTGAAACAAAT  
GCTTCTCCCAGAATGCCCAACACTCAACTCACTACCAGTCATTACAGCCCATTACGT  
GCCCGGGAAATACTCGCCCTCGAGCTGTCTCAGCGATAAGGAAGAGGACGAAATCTAT  
GGCTTTGGATACGGTGTATTCAGCAGGCAAATGCTTCAACAACGACAACAGAACTTG  
CTCTTGCCGCGCAAAATACAACCTGCAGTGACACCTGGTGGACATCAACAACCTTATCA  
AAG

>novel\_circ\_001262

ATTGCAATTCCTGATGTAGTAGAAGCTGCTAAAGATGCAGATATTCTAACTTTTGTAGTA  
CCTCATCAATTTATAAAGAGAATATGTAGTGCATTATTTGGAAAAATAAAGCCTACAGCT  
ATTGGCCTTTCTCTTATAAAGGGTTTTTGATAAAAAGCAAGGAGGTGGTATTGAACTTAT

TTCACATATAATTTCAAACAACCTTCACATTCCTGTTTCAGTTTTAATGGGAGCAAATTT  
GGCTTCTGAAGTAGCAAACGAAATGTTTTGTGAACTACTATTGGTTGCAAGGATAAA  
AATATGGCTCCTATACTGAAAGATTTAATGGAAACATCATATTTTAAAGTTGTAGTAGTT  
GAAGATGTTGATTCAGTTGAATGTTGTGGAGCATTAAAG

>novel\_circ\_001263

GTCCTATGGGTGGTGGAAATTCTGGAGGTGGTGGTGGTGGTTATGGTAATCAAGGAGG  
ATATGGAGGTAGTTCTCTTGGTGGTGGAAACATGGGGGGTGGAGGTGGTGGAGGTGG  
AAGAAGATACTAAAATGCATTATCACTGGTTACTTCCCTCATGTGGTGAACCTACTACTT  
GTCTTCTAGTCGCCAGTACTTCTGTACTGTTTAGTATTGGAGCAGGCAGGGCTATAAGG  
CTAGAGACAAGACCAGGCAGGACAATCAGGATACAGGACAGAGAAGCGTCATCTTAA  
TAGATCACAGTGAGGGAGGCTTTTACTTGTATTTCTTTTGGTATTTAGCACCTATTGCATA  
TATCTATATTCAACTATTTATGTGAAAATACTGCATCACAATTTTCTAGATTGTGTCTGAA  
CTCATTGTTTGGCACATATAATATCCCTGAAAAAGAAACAATTATTAACGTGTAATTAT  
CGTCATTGTTAGTAAAAAAGATATGGATTAATTTGATTATTCAGTTACAATGGCTAGGG  
ATACATCCGTGCCATCCAAATATTAACTTTGTAACATTTTATTATACTTATTATTGTGTAA  
CATCTTTGAAAGTGACTACAGATCTAGGATTTTAGATATTGGAGAGCACGATTGTTTCTC  
TAATTTAATGAAATATATCAATATAGCGGTATATGTAAGAATCTAGGTTTTGATATGTTGAT  
GATTTGTTTCATAATAAGCAAGGTGGTCTTATATAGACTAAACATCTCAGGATAAAAGG  
GAAATTGCATGAGAAAAATGTTAATACAAAATGAAATTAATGAGTTTGCAAAGAACC  
AGGTACATAAATATCAGTTAGCATTTTTGTAGGTTACCTAGATTAATTAATTATTTAAGTT  
GTAATGTTTTAAGAGTTAGTTAATAAAAATGACCAGAACCTTCCACGTCACTTTTTAATT  
TACGAAATAAAATGTCCATAGCATAGGATAAGTAAAAAGTACAAGAAGATGTATCAGTT  
AAAGGAATAGGGAAGTATAGTTAGATAAGGGTATATTTGATTATTATATATAAATAATAAT  
GGAAAATTTCAAATATTATGTATAGAAAGCATTCTTGTATTTTCTGTCTGTGTAGTAGCG  
CTCCGTGTCACAGCTACCATTGTCACTCGTCATAGGAG

>novel\_circ\_001264

CACGGGATCCAGTGATCATCGAGAGGAGTAACCTCGTTAATATCTCGAAATTAATCGTG  
AAGGAGCTGATCGAAACGTCTTTGAAGTATGGTCAATGCTCGACTCTGATCATATGCC  
GTTGCAACATTTCTTCATCGTTCTTGAACACGTGCTTAGGCATGGTTTGCGACCAAAGA  
AGGGTCTCCTTGGACCCAAGAAGGAGCTTTGGGATATTCTACAGCTCGTTGAGAAATAT  
TGCCCCGAAGCGCAGGACATTACGTCCAGTATTCGTGATCTACCCACTGTTAGGACCGC  
CATGGGTAGGGCAAGGGCATGGTTGCGCATGGCGTTAATGCAGAAAAAGTTGGCGGAT  
TACTTGAAAGTTTTGATCGATCACAAGGAGGACATACTGTCCGAGTACTTCGAGCCAG  
ATGCTCTGATGATGAGCGAGGAGGCGATCGTTATAATGGGCCTGTTGGTTCGGTTGAAC  
GTGATCGATTGCAATTTCTGCGTGAAGGAGGAAGACCTCGATTGTCAACAAGGGGTGA  
TCGATTTTTTCATTGTATCTGCGGAACAGCAATCACATACCCGGCGAATCCCCGGACGAC  
GAGCTGGAAAACGACAACATGACGACCGTGCTCGATCAGAAAAATTACATCGAGGAG  
CTGAACCGACATTTGAACGCTACTGTGACCAACCTTCAAGCTAAAGTGGAATCATTGA  
CAACTACGAACGCTCTTATGAAGGAGGATCTCTCCATAGCTAAGAATAATACTGTCC  
CTTCACGAGGAGAATAGACAATTGAAGAAAGAGTTAGGAATCGAGATCAAAGACACG  
AACGAGAATGGGAAACCACCGATCAAAATCACTGAAACGACCACGGAAATCGAGGAG  
TTGAGAAGTAGATTAGAGGCTGAAAAGAAAATGCGGCAGGATGTAGAGAAGGAGTTA

GAGTTGCAGATGAGCATGAAGTCGGAAATGGAAGTGGCTATGAAACTGTTGGAGAAA  
GATATTCACGAGAAACAAGACACGATTATATCGTTGCGACGGCAACTCGATGAGATCA  
AATTAATTAACCTTGGAATGTATAAAAAGCTACAG

>novel\_circ\_001265

GACCGCCATGGGTAGGGCAAGGGCATGGTTGCGCATGGCGTTAATGCAGAAAAAGTTG  
GCGGATTACTTGAAAGTTTTGATCGATCACAAAGGAGGACATACTGTCCGAGTACTTCGA  
GCCAGATGCTCTGATGATGAGCGAGGAGGCGATCGTTATAATGGGCCTGTTGGTCGGTT  
TGAACGTGATCGATTGCAATTTCTGCGTGAAGGAGGAAGACCTCGATTGTCAACAAGG  
GGTGATCGATTTTTTCATTGTATCTGCGGAACAGCAATCACATACCCGGCGAATCCCCGG  
ACGACGAGCTGGAACGACAACATGACGACCGTGCTCGATCAGAAAAATTACATCG  
AGGAGCTGAACCGACATTTGAACGCTACTGTGACCAACCTTCAAGCTAAAGTGGAATC  
ATTGACAACCTACGAACGCTCTTATGAAGGAGGATCTCTCCATAGCTAAGAATAATATACT  
GTCCCTTCACGAGGAGAATAGACAATTGAAGAAAGAGTTAGGAATCGAGATCAAAGA  
CACGAACGAGAATGGGAAACCAACCGATCAAATCACTGAAACGACCACGGAAATCGA  
GGAGTTGAGAAGTAGATTAGAGGCTGAAAAGAAAATGCGGCAGGATGTAGAGAAGGA  
GTTAGAGTTGCAGATGAGCATGAAGTCGGAAATGGAAGTGGCTATGAAACTGTTGGAG  
AAAGATATTCACGAGAAACAAGACACGATTATATCGTTGCGACGGCAACTCGATGAGA  
TCAAATTAATTAACCTTGGAATGTATAAAAAGCTACAG

>novel\_circ\_001266

GACCGCCATGGGTAGGGCAAGGGCATGGTTGCGCATGGCGTTAATGCAGAAAAAGTTG  
GCGGATTACTTGAAAGTTTTGATCGATCACAAAGGAGGACATACTGTCCGAGTACTTCGA  
GCCAGATGCTCTGATGATGAGCGAGGAGGCGATCGTTATAATGGGCCTGTTGGTCGGTT  
TGAACGTGATCGATTGCAATTTCTGCGTGAAGGAGGAAGACCTCGATTGTCAACAAGG  
GGTGATCGATTTTTTCATTGTATCTGCGGAACAGCAATCACATACCCGGCGAATCCCCGG  
ACGACGAGCTGGAACGACAACATGACGACCGTGCTCGATCAGAAAAATTACATCG  
AGGAGCTGAACCGACATTTGAACGCTACTGTGACCAACCTTCAAGCTAAAGTGGAATC  
ATTGACAACCTACGAACGCTCTTATGAAGGAGGATCTCTCCATAGCTAAGAATAATATACT  
GTCCCTTCACGAGGAGAATAGACAATTGAAGAAAGAGTTAGGAATCGAGATCAAAGA  
CACGAACGAGAATGGGAAACCAACCGATCAAATCACTGAAACGACCACGGAAATCGA  
GGAGTTGAGAAGTAGATTAGAGGCTGAAAAGAAAATGCGGCAGGATGTAGAGAAGGA  
GTTAGAGTTGCAGATGAGCATGAAGTCGGAAATGGAAGTGGCTATGAAACTGTTGGAG  
AAAGATATTCACGAGAAACAAGACACGATTATATCGTTGCGACGGCAACTCGATGAGA  
TCAAATTAATTAACCTTGGAATGTATAAAAAGCTACAGGAATGTGAGCACGAACCTAAC  
GCAGAAAGGGGAAATGGTGAGCCGGCTCCACGCCAAGACGAATCAAATAGGGAAGAT  
CCTGAATAATCTCGAGAAGTGCAACCACATGAAAAGGAGGTGGAGAATATTCGTAGC  
CCGACGACACCGAGCAGTGTAACGAAATCTATCCTAAATAAGACCAGTCCCACCTCGC  
CCAGGTGTTACGCTGACAATGCGGTTGATTATCAACAACAACAACAGCATCCCCA  
GTCCAATAATCAGCAACAATCGGCTAACAATCTGCAAAAGTCGACTAATAACCAGCATT  
TATTTACAGGAGTGCGAAGGCTCGCTTAAGCATAAAACAGAACTGATCACTAAATTGGA  
GGCTAAGACGCTATCGATGACTGAGACCATCCAGAAAATGGATGAGAAGTGCAAGGA  
AATCGACGACGTGAAATCAGGAGCGGTGGAGAGGGTGAAGATTTTGGGCGCAGAGGC  
TGCCGAGAGGGAGGCGAGGGCGAATGGGGTCGAGAGGGAATTGCGACTCGAACCTG

AATGGCGGACCTCCTTGCAGGAAGCATCGATCTCCAACGCGGAGAAGATCTCTCAATT  
ACATCAGGAAATCGATCAGTTGAGGCGAGTGTCCGAGAAATACCTGGCCCTGCAGGAG  
GAGCATTACGCGTTGAGGGAGATCTGCACCGAGCAGGAGAGAACTCTGGAGGAACTT  
GGGGGGCAATTGAGCGCCGCGAAATTGGCGGCCGTCGAATTAAGGGAGGCCGCTGAC  
AACGCTCAACACCAGCACCAACAGCACCACCAGCACCACCAGCACCACCAGCAGGA  
GGGAGCGGCGACCTGGGCGAACGATCGGCTGGTCACCCATTGCAAGAGCTGCAACCG  
TGAGTTCAACATCACTCGTCGCAAG

>novel\_circ\_001269

CACACTCTAACGGGCCACTGCGGGAAGGTGATGGCTGCGAAGTTTCTTGGCGAGCCTT  
CAAAAGTAGTTACTGGCAGTTACGATCGTACCCTAAAAATTTGGGACCTGCGTAGCAA  
AGCGTGTATAGAAACAAAGTTTGCGGGCTCGAGTTGCAACGATCTTGTAACCTCAGAC  
GGCGCGGGTTCTACAATAATTAGCGGCCATTTTGACCATAGGATTAGATTTGGGACAC  
AAGAGCCGAATCCAGCTCAAATGACATTTTATTGGAAGGAAAGGTCACTTCGCTGGAT  
TTATCTCGTGATGCAAATTACCTTTTGAGCTGTGTCAGAGATGATACATTGAAACTCATC  
GATCTGCGGATGAAGAAGATCATTGGATCATTAGCGCCGATGGGTTAAAGTCGGTTT  
CGACTGGACACGAGCTACTTTTAGTCCAGATGGTCAGTACATAGCGGTTGGTTCTTCAG  
ACGGGTCCGTTTTTCATTTGGTCTGTGCGCCACTAACACGATTGAGACTGTGTTGAAAA  
CCATTC

>novel\_circ\_001270

ATACTTCTCTCGCACTTCGACGCGTTCAAATTCCCTAGCTCGGAGGTGGTACAGTTCCG  
GGCCCTGGTCACGCCTTGCATGCCCACCTGCGAGCCGGTGCAGTGCATCAAGAGGA  
GGCGACCGGCGAGCTTCGGTCCGTATCTCGTACGGGAAGCGGCGTCGCCGCCGCTCG  
GCCGGCTCCCAGACCCGCGAGGACCTGCTTCTCGTCCAGTCGATCCAGATCACGGACA  
AGTTCGGGTTCGAGCACGACAGCAAGGCGTCGAACGCGAGCTCGGCCAGCAGGGAC  
ACGGTGTTCGTCGAGAGCGAGGACATATCGTCAACCATGGGCATGTGCATCAACCTGG  
GCGAGGGCGATCGTCGCGGGGACCGTGTTCTCGTCGCGCAGATCGCCATCATAGCCGC  
GTGGACGTTACCTGGCAGAGACGTAGGCAGATGCTCAAGCATCAAGAGGCGCTCTC  
GGTCTCGGTCTCGGTCCCGGGGATGCACTCCGTCCCAGGACGCACCGACAGCCTCT

>novel\_circ\_001273

GCGCTTTTGCAAGCACATGACGTAGCGGGACATGAAGTTTATGGCGAAGAAGCCACCA  
GAGTTACGCCACCTCCTCTTCTCCCCTATCTAAACGGAGGCGACGATCTCGAGGGACA  
GAACGGTGATTTGGACCTCGAAAATGTAACGCGCGTCAGGCTGGTCCAATTCCAAAAG  
AATACGGATGAGCCAATGGGAATCACTTTAAAAATGAACGAAGATGGAAAATGTGTGG  
TAGCACGAATTATGCACGGTGGTATGATACACAGACAAGCGACCCTTCACGTGGGTGA  
CGAGATCAGAGAAATTAATGGGATACCGGTGGCCAATCAATCTGTCAATGCCTTGCAA  
AAGATACTCCGGGAAGCACGAGGTTCCGGTGACGTTCAAATCGTGCCATCGTACAGGA  
GCGCGCCACCCCCCTGTGAG

>novel\_circ\_001274

GCGCTTTTGCAAGCACATGACGTAGCGGGACATGAAGTTTATGGCGAAGAAGCCACCA  
GAGTTACGCCACCTCCTCTTCTCCCCTATCTAAACGGAGGCGACGATCTCGAGGGACA

GAACGGTGATTTGGACCTCGAAAATGTAACGCGCGTCAGGCTGGTCCAATTCCAAAAG  
AATACGGATGAGCCAATGGGAATCACTTTAAAAATGAACGAAGATGGAAAATGTGTGG  
TAGCACGAATTATGCACGGTGGTATGATACACAGACAAGCGACCCTTCACGTGGGTGA  
CGAGATCAGAGAAATTAATGGGATACCGGTGGCCAATCAATCTGTCAATGCCTTGCAA  
AAGATACTCCGGGAAGCACGAGGTTCCGGTGACGTTCAAAATCGTGCCATCGTACAGGA  
GCGCGCCACCCCCCTGTGAGGTACAATTGTTTCAGGATTAAGCCTCTGCCAGTGTTAATA  
TTCGTTTCGAGCACAATTTGACTATGATCCGTTGGAGGACGAGCTGATACCGTGCGCCCA  
AGCCGGGATCGCGTTCAAAACCGGCGACATCCTGCAGATCATCAGCAAGGACGATCAT  
TATTGGTGGCAAGCGCAGAAGGACAACGCGGCCGGTTCCGCGGGGTTGATACCTTCTC  
CTGAACCTCAGGAACGACGTATCGCTTACATGGCAATGGAAAAGAACAAGCAAGAAC  
AAG

>novel\_circ\_001275

ACATCTTCATCAACCAAGACAACCACAATGACAACCTGCAGCAAAATTATATGGCAAGG  
ATTTGAGTGAATATGATGATGTGGATGTGGATGATTTATTGGCACAACCTTACCCCAGAA  
GAAATTAATATACTAGCTAAGGAAGTGGATCCAGATGATAGCTTTATGCCACCATCACA  
GCGTTGTAGCTATGAATGTGACAAGAGTCCTACAGGACCATTAAATCGTAAGAAACTCA  
TTGAACATATCAACAAACAAGCTTTAGAAACACCAGACAGACCTGAATTAACCTTA  
TGTACCTGGTGTAAATAAGAGGAAAAAAGTGGGTTCACCTCCTCAAGAATCAACAAAA  
GAAAAAGAAGCAGAAGAACAATTGCTATTGATCTTGGAGAAGAATATGAACAAGCAT  
TATCTAATGCTACTCAAGAAGAAATTATTGATCTTGCTGCTATTCTTGGATTTCAATCCAT  
GATGAATCAAGATCAATATCATGCTTCTCTATTAAATTCTGGCCAACCTGTTGGTTTGGG  
TTGGGATGGTATAACAAAAGCTAGTCAACCAAAACCTTACCCAATGGAACCTCCCAAT  
GATACAGATGTTGATGCTACTATTAAGCAAGTTAGAGAAGATGATGTTTCATTAATTGAT  
TTAAATTGGAATAATATCAAAAATATATCTGATGAAAAATTTATTCAATTATTCTGAAGGAT  
TAGAGATAAATACACATCTCGAATCTCTAAGTTTAAACGAATGTGGGACTCACTGACAAG  
ACTGCACAAAGGTTGGCAGATGCCTTAGAAAAAAATTCAACGCTCAGAGTACTCAAC  
GTGGAAACAAACTTTATAAGCCCATCTGTGATAGTAAGGCTCATCAGGGCATTGCTTAA  
AACAAAATCAATAGAAGAATTTTCGATGTTTCGAATCAGAGGTCGCAGGTATTGGGAAAT  
AAAATTGAAATGGAAATTACACAATTGGTGGAACAAAATCCAACATTGCTCCGACTTG  
GTCTTCACTTGGAAATCAATGATGCTAGACATCGCGTAGCTGCACATTTACAACGCAAC  
ATTGATAGGAATGGGAGCAATTGTATGGGGGACCATGGAGATCATATGACGAAATGCTT  
CTAATTCCTCCGAATCTGCTTCGTAGTCTTTCATAGCGCTTTATTAGCACATCATCATTCA  
TCCATTTCATCCTGCTAAATTCATTTATTATTTTCTAGCTAGTGATATAGAGTCTGTCTGTG  
TGGCACGCGCGAAGCAAGAGGCCGGTGAACCTGCTAAAAGTTTCACTGTCCCAGTAG  
GTGGTGTAAAGAAAGGAATCGTAGCGCTGATTAGCGCATACGGAAAGACCTAACGCTGC  
GACTACAGTTCCGATTCTTTAACATGAATCACAGGAAACCTGCCTTGATTCAATGAAAG  
TACGGCAGTCCCGGCTCGGGGTGGCGACATCTTAACGCGAAGTGGCGTTCGCCTAG

>novel\_circ\_001277

ACATCTTCATCAACCAAGACAACCACAATGACAACCTGCAGCAAAATTATATGGCAAGG  
ATTTGAGTGAATATGATGATGTGGATGTGGATGATTTATTGGCACAACCTTACCCCAGAA  
GAAATTAATATACTAGCTAAGGAAGTGGATCCAGATGATAGCTTTATGCCACCATCACA  
GCGTTGTAGCTATGAATGTGACAAGAGTCCTACAGGACCATTAAATCGTAAGAAACTCA

TTGAACATATCAACAAACAAGCTTTAGAAACACCAGACAGACCTGAATTAAACCTTA  
TGTACCTGGTGTAAATAAGAGGAAAAAAGTGGGTTCACCTCCTCAAGAATCAACAAAA  
GAAAAAGAAGCAGAAGAACAATTGCTATTGATCTTGGAGAAGAATATGAACAAGCAT  
TATCTAATGCTACTCAAGAAGAAATTATTGATCTTGCTGCTATTCTTGGATTTCATTCCAT  
GATGAATCAAGATCAATATCATGCTTCTCTATTAAATTCTGGCCAACCTGTTGGTTTGGG  
TTGGGATGGTATAACAAAAGCTAGTCAACCAAAACCTTACCCAATGGAACCTCCCAAT  
GATACAGATGTTGATGCTACTATTAAGCAAGTTAGAGAAGATGATGTTTCATTAATTGAT  
TTAAATTGGAATAATATCAAAAATATATCTGATGAAAAATTTATTCAATTATTTCGAAGGAT  
TAGAGATAAATACACATCTCGAATCTCTAAGTTTAAACGAATGTGGGACTCACTGACAAG  
ACTGCACAAAGGTTGGCAGATGCCTTAGAAAAAAATTCAACGCTCAGAGTACTCAAC  
GTGGAAACAACTTTATAAGCCCATCTGTGATAGTAAGGCTCATCAGGGCATTGCTTAA  
AACAAAATCAATAGAAGAATTTTCGATGTTTCGAATCAGAGGTCGCAGGTATTGGGAAAT  
AAAATTGAAATGGAAATTACACAATTGGTGGAACAAAATCCAACATTGCTCCGACTTG  
GTCTTCACTTGGAATTCAATGATGCTAGACATCGCGTAGCTGCACATTTACAACGCAAC  
ATTGATAGGA

>novel\_circ\_001278

AAATTGAAAAATATATCCTATTCTTCGGTAGGAACGAAAAATTCCGATATTGTGGAGGG  
AACGGTCACTCAACATTTCACTTATCTACACGGTATCCTTCAAATGCGGAGAAACAAA  
TTATCGATTCAATTGCGGGCGCATAAAAATCCCCGGAATAAAAATATCGACGAAATTTCC  
ACGCAGTTAAAAGAACACGAGGAACGACTGCAGTCTGCCATTGTGGTAACTACAGCA  
ATTACAGAAAGTCTTGATAAAATAGATCTTCAACAGATTATACAAAACTAAAGCCCTT  
GACCGATATTCCTTGCCATTTGATACAAAATAATGTGCCAGACGACCAAGAGATAAA

>novel\_circ\_001279

TAATACAGGCAAGAAATATAAATTGTGCTACCACAGAGTACTGCATACATTCTTGCATAC  
ATACGCATTGCAACATTTTATTATATTTGATCACCATAGAAGAATATTTAAACTTCTGACT  
ACTATCAAATGAATACCTCGATTTTGAGCATTTTATGCTGTAAAATTAACTTTACTTTTC  
ATCGAGTGGAGCACCAGCTCTTATTTTAAAAATCTGTTCTTTAGTATAAGAACTAACTA  
ATGAGGCATTCCAATATTAAAACTTGTCACTCGATGAGAAAAAAGATATAGCAATGAA  
TAGAAATAAATGGCAAATTGAAACAACCTGAGCACATCTACAAAATTAACCACCATAGA  
GA

>novel\_circ\_001280

GGTACGTGTACATGAATGGGGACATTGGGAAGCTCCCACCAGGGGGCGGTATATCCAGC  
CACCCCTGAACCTTTGGGTTCTGTTGGGGGTGCACTTGGAAGTACTGCATCCAATTTGG  
AATATAACATCATGAACGGTGTTCCAAGTGGAATGAATTGATATTGGAGGCGGGTGTT  
GGTAATTTAGAACCTTCACTGCAGCATGCTATAGGTATAGGAGGTGCTGCAGGTTATGG  
TCCAGTGGATGTTGCTCCTTTAAGTGATGTGCCAAATCAACCTGCTCCAATGAGTGACT  
TATCTGCCCCCTGGTATACCATTAGAACAACTTAAACAAATGCTCTCTTCACAACCTTGAAT  
ATTATTTCTCCAGAGAAAACTTAGCTAATGATACATATTTATTATCACAAATGGATAATGA  
TCAATATGTACCAATATGGACAGTAGCTAATTTCAATCAAGTAAAAAAATTAACAAAGG  
ATATAAACTTATAACAGAGGTTCTTAGAGAATCTCCAAATGTACAAGTTGATGAAGAG  
GGTCAGAAAGTAAGACCTAATCATAAACGATGCATTGTAATTCTTCGTGAAATACCAGA

TAGTACACCATTGGAAGATGTAAAAAATTTATTCTCTGGAGAAGGATGTCCAAGGTTTA  
TTTCATGTGAATTTGCCATAATAGTTCTTGGTATGTAACTTTTGAATCTGATGAAGATG  
CTCAAAGGCCTATAGGTTTTTACGTGAAGAAGTTCGGGAATTTTCAGGGAAAACCAAT  
AATGGCTAGAATCAAAGCTAAACCAATGAATAGGCTACCAATCCCGGCAGTTGCTAATG  
TGGGTGGAATTA AAAATGGTTATAGAACACCACCACCACCACCTGTTTATGATCCAAAT  
AGTTATACAGCTGGTCAGCAACGTTTTCTTTATACAAATGGCACTACTATGCCACAAACT  
ACTATGCCAGCATATGCCAATCAGGTTTCATGTATATCATCAACCATTTTATCCTCCTGGAA  
TGATGCCTTGGGGACCTGCAAGTCCTGCTTATTTTGATATGTCAGGTGTTTTTATGAATG  
GTATTACACCACATAATACATTTAAACCACAGAATGCAAGATATAATCCTCGTCACAGAA  
ATAAGCAAAGAAATGGATCTGAAAGACCAGGCTTGATGGATAGTGGAGGTAACATGGT  
GCCAATGGGACGCATTTACATCCACCTATAAGTGGGGGCACCAATATCTTTAGGAGCAA  
CAGTTCCGACATTTACTTCAAGCTTGCCTACGGTGAAACCAACTTCTTCCTACCAA  
GGCACAAGTTCCATTCTCACATACAATTGTAGCAACTGGAGAGACCCACTATAATAG  
CAGTCATACAAAAGGATCCCAAGAAAATGACACTCAAACCTCTAGATTCTGGAGTACAA  
TTTCCGCGTCATCGTATGCATCGTAGGACCAAGACCAAGAGTCATTATCAAAGGCTAA  
TAGTAGCCCTTACCGTCAATCAGAGAATCTACCCCGGCCAGTAATAATAACACTCAAT  
GTAATCGAGGGATACAATTTCGATTTGGAAGCTTCTGCTTTCCTCCTCTTCCTGGCCTAG  
ATGCTGATCTTGCAAAATCCCATATGCTTCAGTAGAAACTGTTGGTACAGATTGTACG  
CAATCGCAGAATAGGCTTTCAGATGTAGTTAAAGGTACTGCAAAATTGAAAAGCATCA  
AAGAAAAAGAACCTACAGGAACCTCACACAATATCATCAACAAGCGACAAGTAACA  
GCAGTAGGTCTGCAAGTCCAGGGTCAAGTGCTGGTGGTTCATGCTGGTTCGCTAGAAGC  
TCCAACTGGTTCTGGCAGTACATCAACTACTCCTGTTGCATCTACAAATGTCAGCTCTA  
ATGCTTCTGCTAGCAACAATGACTCCACAGACATCGCTCTCAGCACCATCACTCTCACT  
CCCCCGTCATCTCCTGATAA

>novel\_circ\_001281

ATGACAACACACCAACTCCAATTGTGGAGAAGTTCGTCCAAGGGTAAAATTTACTTCGA  
TGGCCGACGCCGCAAGCGCAGGTCTTTAACCGAGAAAAAGGAGCTGGAACGTTCCGA  
GGAGGACGAGATGTACAAGCAGTTCGTGGGACAAGCCGAGGGGCATCGAAATTTTTT  
ACGAAACGATGCCAGATACTACTCCGTGGAGAGAAGACGAAATGATCTGAGCGAGGA  
GTATGGCCAGGACTCGGAAATGGAATCGGATCCCTCCGTGACTTGGAGACCACGTAGA  
GCCCTGTCAAGTGAATATTTTCATCGAGATCATGGTGGCTGCGGACGCGGAGATGGTGA  
GGTACCACGGCAAAGGTTTGCTCGGCTACATTTTGGGCCTGATGAGCACG

>novel\_circ\_001282

TTTTCCTAATGAAGGAAGGGGGAGGAGGGAAGGTGATTTATCGTTCCAGAGTTAATTA  
CATCGAGGTCGTTGTGGCAAAAGAAGTGTTTCGCTCGCTGGAAAAACGAAAGTTGCAC  
GCTGGGTGGACATGTGATACGGTGAGGTGGTAATTAGCCATGTTTTTTTGTCCGAGTAT  
GAAGGTCGAAATTTTAACTTTCGTTAAATGGAATGCCATAATGTTTTATCGTAAAAAA  
AAAAAAAAAAAAAAAAAGAAAGAAAAAAAAAATATCGAACGTGAAATAGAGAAACGTC  
AGAATTTTTCAAATATTTTTTCGAGATGGAATATATTATTATAAATCTAAATATAAATATTC  
AACAGCTTACTTTTTTCATCGAATTATTATACTTTATATGCAAATCGTTATTTTCATTTTCA  
CTCTCGAAAACCTTTTTCTTCGGCAATATGAGTGTA AAAAGAGTTTAATGATTATTCTGTT  
TTATTTAAATAACGAATTGTCTCTCTTCGTTTCATCGATATAAATTTATTTTATTCAACC



ATTTTTTAAATAATCTTTTTTAAATATCTACGAGCGATATTCGATTGTTCGATGTACATATAA  
GTCCGATTAATAAAATATTACAGATAATAAAGCTGATCGCAATATTCAATCGCGAAACA  
AGTTCGATATTGGCGTTTCGAAATTAATATCTGTGCCAAATGTACTTTCCATACGAAGGAG  
CAAACTTAACACGCATAATACCTTTGAATACTTTCCTGATCGGGCATTGCACACGCCA  
CTAAGCATCGTCCTACATGCATTCAAAGAGATTCACTATCCGCGATATCCGTTTAATTTT  
GTTCAATTGTAATCTCCAATATGAACTCGACTCGATTTCGATGAAAATTAATTATGCATAG  
TTATGCTCCAGATGTTCAATCGTCTGCATTAATATTTGGTCGAAAATTATCGAGCTTTTG  
CTGATTGTTTCGAATTTTCTTTCTTTTTTTTTTTTTTTTTTTTGCTCAGTGATATTAATTTTTTA  
ATCTCTCGACTGGAATAACTCGCTTAAAATTTTATGATACCTTTTATAATTTAATATTTAA  
AAAGAGTAGAATAATGGATAATCTGATGAAAAGTTTAAAAGAAATATTTCCAAAAATAT  
TGTTTTCTAATAAATTAACCGATTTAAGACACCCGGTATATTGAAATATTTATTCATAATAT  
CACGAATTTTCTTTTCGATTGACTATTTCTTTGTCACTATTTTACATAGTCAATTATTAT  
ATTACAAATTCCTTCTAATCGATTATAAAATAATCTGTCAATTACAATTTCTTTTCGAAT  
CAAAATTTTCAGATCCGAGTTTCCACTTAAAAATTTTATCTTCCAATAATTTTATAAATT  
CACCACGCGTAGAAATGTATAGAAATCCTATTATTTTATTTTCTTCTTCGAATTTATGA  
AATACCCTATATACGCTGAACCGTCTAGCCGTATCGCGAATTGTTTCGCGAATCGATCGT  
GTACATCAAAGTTTGGCGCCCGCCACCTTACAAGTTTCTTTGGGAACTTTGTACCATGG  
AGAGTGAGAAAGAGGAATAGGAAGGGTAGAGCGACATATGGAGAATGGAGATGGGAA  
AAAGGGGGGCACCGGTTATGACATAATTGCTTAAGAAAGTTTGGAATGCGAATACACA  
GCTAGAATGTAAGTAGTTCACGCGCATTTTCGCTTAAGTCGTCCATGAAGGTAGTAGCTG  
AATGACTGCCATGCTTATATCCTGCTTATGAATACGTTATTCTATTCTAGATTATCTTTTA  
TCTTTTGTTTCCATTCGGAGAAACGAGATCGCATCATAATTACAGTGATATTTGACCCTT  
TACACTTCCATGATCCGTATGAACGTGCTGAAAAGTCTCTCTTATTTTCGTGACACAT  
ATTTAATCTTGCGATATTATATAGTTGTAGAATATAAAATTATAATAATATTAATATATAATA  
TTATTATAATTATATATTTTATATATTATTAATATATAATATTAATAATATATAAAAATTGTAGAA  
TATCAATACGATATGAAGAGAGAGACAAATTTGTAAATTCTTTTCGTGAAAAGAATAGGA  
TAATTTTGTAAGATATCATTCTTAATTATTTCAATTCATTAATAATTTTACTTTGTTCCGA  
TTGAATCGAATAACAACGAATAAAATAAATTTTCAAGTATACTATATTTGTATATATATA  
TAATTATTTATTATGTTTATTTGTGAAAATATTAATTAGAATACTTTATTTTTTCAGGAAAT  
AATTTATTCGTGGCCATGCTTGTATGTTCCATTTAGTAAAAAACGATTATTTTACCCGA  
ACATAAAGATCGGAATGTTTTCGTGGTTCGTTAATCGAGAAAGGATTTTCAAAAATTTT  
AATTTTCGGCGCGGTTTGAGTGGAAGGAACCATGCCGCGCCAGCCAATCAGAAAG  
CTTGGAAGCGTACCTGCTGCGCGCGACGTCAATTCGGCTGCCGAAAATCATCGTGGCAG  
GACGTGTGATACCGCTCGATATATATAACCTCAATTACGTAATAGATATTTCTGTTATTATT  
TTGTTAATTTACGGTTTAAATTGTTATTAGTTTTGTTTTGTTCAATGTGTGTTTCGTTTCAT  
AAGAAATTGTTATGATAGAATTAAGTGATATTGTGAATTTTCTTTGCTTGTTTTCGTTGAT  
CGATTATTCGACCGTTGAAGTTGCCGGTATCTCACGTTATTTATTCTTTTAAGGTAGAGT  
TCGATTTCGATATTATTGTATCATTTTACTATATTTGATTTCAATTTTCGGGTATTTAATTTAAA  
TCTATAATTTCAATTATGTACAGATCATTGATCGATTTGAAGGAATGAGCGTTATGCATTTT  
TGACGCTACGATGATTAATGGCGAATGAGATGAGTCTTCATGCAGCATTATGGGTTATGT  
TTGATTTATTGCAACAATGAT

>novel\_circ\_001283

CACAAATTCGTTCGAACGAAGCTTTAGAAGAATTCAAATAAAAAACAGAACAAAGCA

CAGCAACAACGAAAAATTGTAAATCTAACGAATAAATAGTGTAATGACTAGAATAGGA  
AGAATTGTACAAAAAGCTCATGGATCAAATGATAGATAATGAAAAATAAATCAAATAA  
TGC GTAAAGATTATTTCTGTACATCAAATTCAAAAGATCGTCCGTATTTTATAACAACTT  
TATACTCGATAGAGTATAAATCATTTATAAGAATATATAAAGATATACGGCTGTCTCTTTC  
ATAATTGACAAAAAGAAGCTTCACAATGTCAAACAGCGGGCAATCGCTACAAAACAA  
GATTGACTTATAAAAAAAAAAAAAAAAAAAGAAATAAAAATTGGATTATTTGACGAATAT  
TTAAATAATTACTATAATTATGGATGAGATAAAAGTGGCGAACTTGGGCCAAGCGGCA  
TCAGCCGCATGCTCGATGGCTACAAATTTCTTGGCGCCAGTGAAGACCGAACGGCAGA  
TCTACGAGAATTCGATGCTCGAGGACGATCCCAATGCCAATTCGGTGGTATCAACTTCA  
CAAGAAGACAGAACCGTACCGAGATGGGGTCTAATCACAAGGGTGTCAAGAATTG  
GCAAATCTTTATAGCACTG

>novel\_circ\_001285

AATTTTGGAGAGCTTCAAGATGCCCAGGAGCACAAAGTTTTACATCCATGACATTCTGC  
AGCTTGATTCTGAAGCCGTCCCAGGAGGAAACGGAAGTGCAAGGTAGTACCACGGTGC  
TACCGACCACGAACGATGTTCCGTTCGACATACCAACAGTTCTTCGAGCACACGACGGC  
CATGTTACAGCCCGCGATATACGCGAATCTGAACAGAGGCACCTTACCACCCCCGCCG  
CCACCTTTATTGGCATGGCCGACCGGTCCAACGTTACCGACCACGTTGCCTCAGCCTTT  
GGAAGAGGTGAATG

>novel\_circ\_001286

ATTCTTATAAACTATAAAAATGCCTCGAGTAAGGAGACAAGTGGTCTTAGAAGATCCTG  
CTAGGCCTGTACACCAGATATGGTGGAGACTAAATTACTAAAAGAAGAATTTTGGAT  
GAGGGCTCTTTGGATGAAGTACAAGCACAAAAAGTAGCTGAAGAAACACCAAGTCCT  
CATCTTCAAGACCACCAATATGGACAAACACCTTGTTATCAAGTAACAAGGAAACCTA  
CACAACCACCACCGAACTGAACAAATTTCAAGTTCAAGCAGTGAAACGAAGACTGA  
ATTTGGAATGGGAACTACAGGCCCTAGCCAATCTGCCTTTAAGGCTCCTAGAGGTAA  
ACGTAGAAAATCTGGATCAAGTTCTCTAGCTGGCCATACACCTACAAAAAGTAAAACA  
GTAGAGAGAACGCGGTACGATACATCACTGAGCTTACTTACAAAAAGTTCATACATTT  
AGTTGAAAGCAGTCAAGATGGTGTGTAGATTTAAATGTAGCATCTGAAAAGTTAGAA  
GTACAGAAACGTCGTATTTACGATATTACGAATGTATTGGAAGGCATAGGTATTTTGAA  
AAGAAAAGTAAAAACAATATACAATGGAAAGGCGGTCAATTACCAAATGAAAGGAAC  
GATATCGCTGATCTCAGAAAGGAAGTGGCAGATTTAGAAGCTAAAGAAAATACTTTGG  
ATCGATTAATTCACGGTGCAGACAAAAATCTTAGGGAGCTCTGTGCAGACAGACAATA  
CGCTTATGTAACGTATCATGATTTACGTTCTGTCCCAATGTACAAAGACCAAGCTATAAT  
GGCGGTGAAAGCTCCACCAGAAGCTACACTTCATGTTCCACAACCTATTAATAATCTTG  
GTCAACAAAAGCTTCAAATGCATATGAGGTATCTCATGGTGAAATAGAGGTATTTCTT  
TGTCCTGATGATCCTGCAGTTAAAACGTCTCCCACTCCGGGTACACGACGACGCAAC  
CTGTGCCTTCGTCAAAAGAATCCGAAATACCTTGTCTCCCTCCTGAACTGCTGGCCAAT  
GGAGGAAGCGGGGTTCGGGTGTAACCAGTACCTTCTATCGAAAGTTCGTTGAGTACTC  
GTTTGTGTACTCCGGTTATATCTACAGTTACCAGTTTAGCAGGCATGAGGGACGCGCTT  
TTGTGTGAATCCGATGATTATGGACCAATGGGTGGTGGCAAATTCCAACCTCAAACGG  
AGGATCAAATTAGCACTCCAG

>novel\_circ\_001287

GAGGTACCCTATTTGGAAAACATTTAGTTAGAGATCTAGATCTACAAAGACCATGTTCT  
TGTCAAAGAAGACGCAAGCGTTGTTTTTGTTCCTCCAAATCGCAATGAAAATTGGC  
TTTTTCAAGATATCCACTGGTTGGAAATGTGGTCTACATGCTGACTGGACAGAATTA  
ACTAGTTGTGTTGATACTGAGTTAAATAAAATTGAGGGGGATGGAATAAACGTAGATA  
CTTTTATATAACTATAATAAGGGATCCTGTTGCACGATATTTGTCTGAATTTAGACATGTA  
CAAAGAGGAGCAACCTGGAGAGGAGCTCGTCATTGGTGTGGAGGAACTCAAGCAAAT  
ATACCACAATGTTATCCTGGTTCTAGTTGGCAAGGAGTTTCTTTAGAACAGTTCATGGC  
GTGTCCATATAATTTGGCAAGCAATCGTCAAACAAGAATGTTGGCTGATCTATCAATTGT  
TGGTTGTTACAATTCTACACTCAGCAGTTTGGAGAGAGATCGTCTCATGTTGGCTAGCG  
CTAAGCACAATTTGCAATTCATGCCTTTCTTCATGTTGACTGAATATCAAAAA

>novel\_circ\_001288

AAAATCGGATCGTATCATCGTATCATCGAAACCTGTTCGTCAAAAATCTTCGAAAAATT  
CGTCGAGAAACATCGAGAGAGGAAAAGAATATGAAAAAGAGAGAGAGAAAGAGAG  
AAAAGAAAAACAATTAATAAATTAACGAGCCAATCCGAAAATGTAATTAGCTTGAAGGG  
ATTTTAATATCTTCTATATGTGTGTACACGTATCTTACTGGGGAGGAAATTGGCATAATAA  
AACGAAGGCGTGGGTAAAAGTGAAGCTGACACGATGCTAGTTCTGTAGGACGATTAG  
GAGAACAAAGGAGGGGGCGAGGGGGGGCTTATCTGGCGGGCAAAATGTCAATTAACA  
CCGAATCAATGGGGGATTTAAAGGATCGATTGACAATGGAAAAGATGGATTCTGTGCC  
AGGATGTTTCGAACTCGCACCACGTCCCGCTTTTTTATGGCCGTTTCGTTAGCAGAGTTG  
CCTGCCTACGCCCCGAGTTAAAGCTAG

>novel\_circ\_001289

GTGATGAGATGTTCTCAGATACTTACAAAATAAAATTGGTTGATGATGTTCTATATGAAG  
TATATGGCAAGGTAATTACTCGTAAATCAGGTGACATAGAAATTGCTGGTTTTAACCCAT  
CTGCTGAAGAAGCTGATGAAGGAACAGATGAATCTGTAGAATCTGGTGTTGATATAGTT  
ATGAATCATAGACTTCAAGAACTTTTGCATTTG

>novel\_circ\_001290

GTGATGAGATGTTCTCAGATACTTACAAAATAAAATTGGTTGATGATGTTCTATATGAAG  
TATATGGCAAGGTAATTACTCGTAAATCAGGTGACATAGAAATTGCTGGTTTTAACCCAT  
CTGCTGAAGAAGCTGATGAAGGAACAGATGAATCTGTAGAATCTGGTGTTGATATAGTT  
ATGAATCATAGACTTCAAGAACTTTTGCATTTGGTGATAAAAAATCTTATACTTTATATT  
TAAAAGATTACATGAAAAAATTGGTAGCAAAGTTGGAAGAACAAGCTCCTGATCAAGT  
AGAAGTTTTTAAAAAAAACACAAATAAAGTAATGAAAGACATATTAAGTCGTTTTAATG  
ACTTACAATTTTTCACTGGTGAATCTATGGACATTGATGGTATTGTTGCGTTATTAGAATA  
TCGCGAGATTGACGATGAATCCGTGCCTGTTCTCATGTTATTCAAGCATGGTCTTGAGG  
AACAAAAGTTCTAAATAATTTAGGTATACAACAAATTGTGGAAAAAATATTATAAACT  
CAAATCAAGACTGTACACAATGCTGAAAAGCTTGTGAAATTTAGTTAATGGAAAACAC  
GATTTTACTTCCAATCTTATTCTATAACGCAGTTAACTTATTTTTTTTTTAAACAACAATCG  
ATGCCAGTCTCAATGGAACATAATAATT

>novel\_circ\_001291

GGCTAAGTCTGGACAACAGCAACATGTCCATGTCCTCAGTGGGCCCCGCAAAGTCCACT  
GGACATGAAGCCCGACACAGCAAGCCTCATCAACCCCGGAAACTTCAGTCCTTCCGG  
CCCCAACAGCCCGGGATCCTTCACCGCTGGTTGTCACAGCAACCTTCTAAGTACGTCG  
CCGAGTGGCCAGAACAAAGCAGTCGCACCCTACCCGCCGAACCACCCTCTCTCCGGA  
AGTAAGCACCTCTGCTCGATTTGCGGTGACCGTGCCAGTGGCAAGCATTATGGTGTCTA  
TAG

>novel\_circ\_001292

AGCGATCGAGAGTTGACCGTTCGAACGCGAAACAACCAAAGAGGAGTGCATTGAACG  
AAACCAAATCGATACCAAAGAAGAGGGGAAGTTAGCTCGATTTAGAGAAGGAAGGA  
GGAGAAGGAGGAGAAGGAGGGAGAGGTGGAGGAGGAGGTCGAGGAGGAGGAGGAG  
GAGGAGGAGGAGGAGGAGGTGATATGGTGGTTCGGCTAGTCGTTTTTTTCGTTTCTCTT  
CGAGATGACGCGACAAGGATATCGTGCGTGTTTCGCTTGAGAGTAGGATCTTTCGGATC  
TTTCGGTGAAGTGTAAGAAGGGGGGGGAAGGAAAAGAAAAAAGAAAAA  
AAGAAAAGAAAAGTAAAAGTGACGAGTGAAAACAGGAAGATCAAGACTGCCAAGAT  
GATGAAGAAGGAGAAACCGATGATGTCGGTGACCGCCATCATCCAAGGGACTCAGGC  
CCAACATTGGTCCCGTGGCAACACTTGGCTAAGTCTGGACAACAGCAACATGTCCATG  
TCCTCAGTGGGCCCCGCAAAGTCCACTGGACATGAAGCCCGACACAGCAAGCCTCATC  
AACCCCGGAAACTTCAGTCCTTCCGGCCCCAACAGCCCGGGATCCTTCACCGCTGGTT  
GTCACAGCAACCTTCTAAGTACGTCGCCGAGTGGCCAGAACAAAGCAGTCGCACCCT  
ACCCGCCGAACCACCCTCTCTCCGGAAGTAAGCACCTCTGCTCGATTTGCGGTGACCG  
TGCCAGTGGCAAGCATTATGGTGTCTATAG

>novel\_circ\_001293

AGCGATCGAGAGTTGACCGTTCGAACGCGAAACAACCAAAGAGGAGTGCATTGAACG  
AAACCAAATCGATACCAAAGAAGAGGGGAAGTTAGCTCGATTTAGAGAAGGAAGGA  
GGAGAAGGAGGAGAAGGAGGGAGAGGTGGAGGAGGAGGTCGAGGAGGAGGAGGAG  
GAGGAGGAGGAGGAGGAGGTGATATGGTGGTTCGGCTAGTCGTTTTTTTCGTTTCTCTT  
CGAGATGACGCGACAAGGATATCGTGCGTGTTTCGCTTGAGAGTAGGATCTTTCGGATC  
TTTCGGTGAAGTGTAAGAAGGGGGGGGAAGGAAAAGAAAAAAGAAAAA  
AAGAAAAGAAAAGTAAAAGTGACGAGTGAAAACAGGAAGATCAAGACTGCCAAGAT  
GATGAAGAAGGAGAAACCGATGATGTCGGTGACCGCCATCATCCAAGGGACTCAGGC  
CCAACATTGGTCCCGTGGCAACACTT

>novel\_circ\_001294

GTCGATCTGGACGACACGATGGACAATTTCTTCAACACCCTGTATCAAAAGATGTTTAC  
CGTGTTGAACAGTCAGTACAATTTGACAATAAATACATGGAATGCGTGGGTGAGCAC  
ATGAAAGAGATCAGGCCGTTTCGGCGACGCCCCGCAGAACTCGGGGTACAGATCAAG  
AGATCGTTCGTTGCGACGAGGGCTTTCAGCCAGGCCCTGACCGTGGCCGCCGACGTCT  
TGAAGAACATGCAATCGTTGAAGCCATCGGCGGAGTGCGCAGCTGCTCTCACGAGGAT  
GACCGTCTGCCCTTCGTGCAGCGGGATAGCCGGCAACGTGTTGGCGTGCGGCGACATG  
TGCGCCAACGTGATGAAGGGTTGCCTTGCCCAGCATGCGGCTCTGGACACTGAATGGA  
ATCACTTCGTTCGAGGCCGTGGACAAAGTGGCGGACCGATTGTTGGGCCCTTTCAACAT  
CGAGATGCTGGTACGGCCGCTCAACTTGAAAATCTCGGAGGCGATCATGAACCTTTCAG

GAGAACAGCAACGACGTCTCCCAAAGGGTGTTCACCGGCTGCGGCCGGCCCGTGTG  
GGGAGGCGTAGGCGTCGGGACAATCGGGAATTGGAACTCGAGTCGTTGAATTCGACC  
AGGACACGTTGACGGACGATCGCGTCTCGGCCGCGGCTATCCTCGACAAATTGGTGAA  
GGAGACGCGGCAGAGAGTCAGGGATTTCGAGGCAATTTTGGGTTTACCTACCTTACAAG  
ATTTGCAACGACGGCCTCGTCGTGCCTCCTAGCAACACCAAGGAATGCTGGAACGGCA  
CGCACGTCGACAAATATATTTATCCGGTTTCGTCCAATGGCGAGGATCAGAAATTGAAT  
CCAGAAGTGCTTAGCACGGGATCAAGGCCGACAATTGTCAGGGACCAGGTGTTTCGCG  
TTGACCACCATCACGAATAGACTGAAATCCGCTTACAACGGGCAGGACGTTGATTGGA  
TAGATACAG

>novel\_circ\_001295

GTCGATCTGGACGACACGATGGACAATTTCTTCAACACCCTGTATCAAAAGATGTTTAC  
CGTGTTGAACAGTCAGTACAATTTTCGACAATAAATACATGGAATGCGTGGGTGAGCAC  
ATGAAAGAGATCAGGCCGTTTCGGCGACGCCCCGCAGAACTCGGGGTACAGATCAAG  
AGATCGTTCGTTGCGACGAGGGCTTTCAGCCAGGCCCTGACCGTGGCCGCCGACGTCT  
TGAAGAACATGCAATCGTTGAAGCCATCGGCGGAGTGCGCAGCTGCTCTCACGAGGAT  
GACCGTCTGCCCTTCGTGCAGCGGGATAGCCGGCAACGTGTTGGCGTGCGGCGACATG  
TGCGCCAACGTGATGAAGGGTTGCCTTGCCCAGCATGCGGCTCTGGACACTGAATGGA  
ATCACTTCGTCG

>novel\_circ\_001296

GTGAGTATCTTATGCGTGCATCCTCGATACGCGCGGAGATAAAGATCAACGATTCAGTT  
ATCGTCCACCTTCGAAGAAGAGGAAGAAAAGAAAATGGAGGAGGATGAAGCTATACG  
ATGCTAGGAGAAAATTGTCGATCAAAATTGTTGTTATTGTTGTTTTTATTATTATTATT  
ATTACTTTCTTTTAAAAAAATTTTCCCTCTTGAAACGATCGGGAAACAGATGGTGTTT  
CGTGCGACGAAATAACACGAATGTTAATCAAGTGAATTTTGGCGATTAAAATTACAA  
TTTTATTACGAGTGGTCCTCGCGAAACGGGATAAAACGGGCCTCCTCGTGTTCCCTCG  
CAGAGAACCAGTTTCGATCGTCGATTCGTCGCTTTGTTAACCGCTTCCCCTTCTTTTTT  
TTTTTTTTTTAATGCTTTTTATCCCTCCTCTCCTCTTCCGTGGATCCACGAGAAGTCCA  
AAAGAAGGAGGAAAGCGTTTCACACGATTCGCTGATTGAAAGTGCATATTTGTACAGG  
TGCAAATATCAACGCGAACAATTTGATGCAGATGGAAGATTATTTACGCACCCCGATA  
TCGATATCGATGCCTTTGATAAATTCGATCGATTTAATTATTGCCAAACGTCCCCTAATTG  
GGCTCGTTTAAGAATTTACGTTTTCAACTAGTTTGATGAAAGTTGAAGAAGAATTTTT  
CGTCCCTAGATTTCTAGGGATCACTAGGAACCTTGGGAGTTATATCTGTACTCGAAAAT  
GGAATGATTAAAAGAAGAGAGAAATTTCAAATTTAAATTTAAATATTCTCGAATAGTTG  
ATAAGAATAATTTCCCTTTTACAGATATTGCGATCGAAGTTTAACTATAATTAACCACGTA  
TGCGGATACGGAGGAAAGATATATACGCGAATGCGTGTTTGAAATTGCTCCGTCGAAAC  
GAGGCTGAAACCTTTTCTTCGTTGTGAAACCTTGTGCACCTTTTAGTTATTTTCATCTCG  
TTATAGACGCATAATCTTAGATATTTTTCTTCCACATTTTTTTTTCTTCCTGCAAGTAATTG  
CAATCGACCGCAGAAAACCTATCTCCAAAGCAAGTTTCCGACAAGCGAAAGAAGGAG  
GAAAAAATATCACGTTGACTAAACCGCAAAAATATGTCGTCTCGGGGAAAAAAGGGAA  
GGATGGAAAAAAATGAAGAGATGCCACCGTGAGTTATTTGACGACAGTGTAGACAC  
CGGTGGTGGCGCACGCAAGTCGAATGGAAAGAGCGTGGTGTGGTGCGTGACGTGA  
AACATCGGCCCTTTGATATGGCAAACGAGACGCGTGGGTGCGCGCTCGTCGACCGA

AGAATGCACCTTGTTTGCCCAG

>novel\_circ\_001297

CGAAATCCACGCAAGAATGAAAAAAGAACAGTTATAAAAAAGAATGGAAATGATTAT  
AAAAAAAAGAAATTTAAAAAAGATAGAAAACAAAACATATAGAGTTTAAAGAAATG  
ACGAAAAAGAAATATTTACAAGAAAATGCAGAATAGATAAAATGAACAGCAAAA

>novel\_circ\_001298

TTTTGCTGTTCATTTTATCTATTCTGCATTTTCTTGTAATATTTCTTTTTTCGTCATTTCTTT  
AAACTCTATATGTTTTGTTTTCTATCTTTTTTAAATTTCTTTTTTTTTTATAATCATTTCATT  
CTTTTTTATAACTGTTCTTTTTTTCATTCTTGCGTGGATTTCG

>novel\_circ\_001299

AATGAAAAAAGAACAGTTATAAAAAAGAATGGAAATGATTATAAAAAAAGAAATT  
TAAAAAAGATAGAAAACAAAACATATAGAGTTTAAAGAAATGACGAAAAAGAAATATT  
TACAAGAAAATGCAGAATAGATAAAATGAACAGCAAAATGAAATGTTATGCCAAT

>novel\_circ\_001301

GGGTGGACAAGGCGTACGATGCTTAGGGATGCTTGGTTCGAACGACGGTGGGAAAGGC  
TGGTGGCGATGGTGGTCTAGGTTGGGCGGATTGCTGGCGATGGCGACGGCCATTTCTT  
GTCTTGTTGCCCCGTTTCCGGGTGCCTCGGCCAATTCGGAAGCGAAGCGTCTCTACGA  
CGACCTGCTGTCCAACCTACAACCGCCTCATCCGCCCCGTTGGCAACAACAGCGATCGC  
CTCACTGTCAAAATGGGACTGCGCCTCTCCAGCTCATCGACGTT

>novel\_circ\_001302

GTTGACCGTTTGAATGGAAGTCGTTTGAGCGGTCGAGAGGATCCTCCCACGAGGAAG  
AATCCCGGTTAGAGAGCGAAGAGAGCTGCGAGGAGAGAGAGGGAGAGGGAGAAGAG  
GAAGACACAGGGTAGCGGATCGGTAATAATCGAGACACGATGGCGGGCGAGGACACG  
CAAATGTTGGCGAACGGAAACGTGGAGGCGCTCACGATAATTCCACCGAAGATGGCG  
AACGGGAACGGGCTGATCTGCGGGAAGCAGCAGCACAACAACAATGGGTGATACCT  
AATGGAAAGTTGCACGAAATAACAGCGGCGGAAAACGGGAAATTGATCATGTCCGAC  
GAGAAGTCGAGCAGCCTTCACACGGAGTTCGACGATGCCGATGTGTCTTGCGGCTGG  
GGCCCGTGCAGGCCACACTGGCTTCAATATTTGCCACGAAGCAGGCCTTCCTTGTC  
CTTCTGCATCACCTGGGTTGGTTTGGGTTCTTCAGGGAATGTACTACACGTACTTCGT  
CTCGGTGATCACGACGATCGAGAAGCTGTTCCAGATACAGTCGAAGACCACCGGTATT  
ATAATGTCAGCGACGGAGATCGGGCAGATCGGTTTCCTCTCTCCTGCTTACGTATTACGG  
GGGCAAGGTCACCGGCCTAAGTGGATCGCTTGGGGCATGATCCTGTTTCGCGGTGAGC  
TCGTTACCTGCTCGATGCCCCATTTTCATCTTCGGTGAACAGCTGATCCATCAGAACGA  
GATGTTTCTCAGCGGGGTCGAGGGTGGTGACCCGAACAACACCCATCCCATCCCTGCC  
AACCTTTGCAAATTGCAGGAACGATCGGAAAATTCTACGGTCGCCAG

>novel\_circ\_001303

GTTGACCGTTTGAATGGAAGTCGTTTGAGCGGTCGAGAGGATCCTCCCACGAGGAAG  
AATCCCGGTTAGAGAGCGAAGAGAGCTGCGAGGAGAGAGAGGGAGAGGGAGAAGAG

GAAGACACAGGGTAGCGGATCGGTAATAATCGAGACACGATGGCGGGCGAGGACACG  
CAAATGTTGGCGAACGGAAACGTGGAGGCGCTCACGATAATTCCACCGAAGATGGCG  
AACGGGAACGGGCTGATCTGCGGGAAGCAGCAGCACAACAACAATGGGTGATACCT  
AATGGAAAGTTGCACGAAATAACAGCGGCGGAAAACGGGAAATTGATCATGTCCGAC  
GAGAAGTCGAGCAGCCTTCACACGGAGTTCGACGATGCCGATGTGTCTTGCGGCTGG  
GGCCCGTGCAGGCCACACTGGCTTCAATATTTGCGCACGAAGCAGGCCTTCCTTGTC  
CTTTCTGCATCACCTGGGTTGGTTTGGGTTCTTCAGGGAATGTACTACACGTACTTCGT  
CTCGGTGATCACGACGATCGAGAAGCTGTTCCAGATACAGTCGAAGACCACCGGTATT  
ATAATGTCAGCGACGGAGATCGGGCAGATCGGTTCCCTCTCTCCTGCTTACGTATTACGG  
GGGCAAGGTCACCGGCCTAAGTGGATCGCTTGGGGCATGATCCTGTTGCGGGTGAGC  
TCGTTACCTGCTCGATGCCCCATTTTCATCTTCGGTGAACAGCTGATCCATCAGAACGA  
GATGTTTCTCAGCGGGGTCGAGGGTGGTGACCCGAACAACACCCATCCCATCCCTGCC  
AACCTTTGCAAATTGCAGGAACGATCGGAAAATTCTACGGTCGCCAGCTGGATCTCGT  
CCACGGCTCAAACGACTCACACGATAAACGACTGCAAAGGCGACTCGTTGACGGAGC  
AGAGGATACAGAGCAAAATAACACGGTGGTCCTGGCGATATTTTTCGTCTCCTTGTTG  
GGCGTTGGAATGGGTCAGACGGCGGTCTACACCCTCGGTATCCCTTACATCGATGACAA  
TGTGGCCAGCAGAGAAAGCCCGCTCTATTTGCGGATCACGATCGGAGTGAGGATCCTC  
GGTCCAGCCCTGGGCTTCATTCTGGGCTCGTTGTGCACCATGATTTACGCGGATTTGTC  
GGCGAATCCGCAAATCACGCCGACGGATCCGAGATGGGTGCGGGCATGGTGGCTTGGT  
CTGGTGCTGATAGCAGCCATGCTGATGTTGGTAAGCATAGGAATGTTGCGGTTCCCGAC  
GCGGTTGCCCCGCGAGCAGGACGCCGCCGAAACGGGCCGACGCGAAAAAGCCTAGTCT  
CCGAG

>novel\_circ\_001304

CTGGATCTCGTCCACGGCTCAAACGACTCACACGATAAACGACTGCAAAGGCGACTCG  
TTGACGGAGCAGAGGATACAGAGCAAAATAACACGGTGGTCCTGGCGATATTTTTCG  
TCTCCTTGTTGGGCGTTGGAATGGGTCAGACGGCGGTCTACACCCTCGGTATCCCTTAC  
ATCGATGACAATGTGGCCAGCAGAGAAAGCCCGCTCTATTTGCGGATCACGATCGGAG  
TGAGGATCCTCGGTCCAGCCCTGGGCTTCATTCTGGGCTCGTTGTGCACCATGATTTAC  
GCGGATTTGTGCGCGAATCCGCAAATCACGCCGACGGATCCGAGATGGGTGCGGGCAT  
GGTGGCTTGGTCTGGTGCTGATAGCAGCCATGCTGATGTTGGTAAGCATAGGAATGTT  
GCGTTCCCGACGCGGTTGCCCCGCGAGCAGGACGCCGCCGAAACGGGCCGACGCGAA  
AAAGCCTAGTCTCCGAG

>novel\_circ\_001305

CTGGATCTCGTCCACGGCTCAAACGACTCACACGATAAACGACTGCAAAGGCGACTCG  
TTGACGGAGCAGAGGATACAGAGCAAAATAACACGGTGGTCCTGGCGATATTTTTCG  
TCTCCTTGTTGGGCGTTGGAATGGGTCAGACGGCGGTCTACACCCTCGGTATCCCTTAC  
ATCGATGACAATGTGGCCAGCAGAGAAAGCCCGCTCTATTTGCGGATCACGATCGGAG  
TGAGGATCCTCGGTCCAGCCCTGGGCTTCATTCTGGGCTCGTTGTGCACCATGATTTAC  
GCGGATTTGTGCGCGAATCCGCAAATCACGCCGACGGATCCGAGATGGGTGCGGGCAT  
GGTGGCTTGGTCTGGTGCTGATAGCAGCCATGCTGATGTTGGTAAGCATAGGAATGTT  
GCGTTCCCGACGCGGTTGCCCCGCGAGCAGGACGCCGCCGAAACGGGCCGACGCGAA  
AAAGCCTAGTCTCCGAGACTTCCCTAAAGCGGTGAAGAGGCTGTTGAAGAACGACAT

TCTTATGTTCCGGACGGCCAGCAGCGTGCTGCACATCCTACCGATCGCCGGCCTCTACA  
CCTTCCTGCCAAAGTACCTCGAGAGCCAATTTGCTTGCCAGCTCATCATGCGAACATG  
ATCTCAGGTGTCTGGTGGTATTTTAGTAATGGGTTTGGGTATTATAATTAGCGGAGTGTTT  
ATCCTGAGGGCAAAGCCTAACGCCAGGTTCTGTCGCAGCCTGGATCGCCTTCACAGCTG  
TAATATACGCGATCGGCATGGGTGTGCTGATGTTTCATCGGTTGCCCTATGGACGATTTCTG  
CTGGTCTAGTTTCCCATTCGGACGG

>novel\_circ\_001306

CGATCACGATCGGAGTGAGGATCCTCGGTCCAGCCCTGGGCTTCATTCTGGGCTCGTT  
GTGCACCATGATTTACGCGGATTTGTCTGGCGAATCCGCAAATCACGCCGACGGATCCG  
AGATGGGTCTGGGGCATGGTGGCTTGGTCTGGTGCTGATAGCAGCCATGCTGATGTTGGT  
AAGCATAGGAATGTTCTGCGTTCCCGACGCGGTTGCCCGCGAGCAGGACGCCGCCGAA  
ACGGGCCGACGCGAAAAAGCCTAGTCTCCGAG

>novel\_circ\_001307

GTAACGGACATGTTGCGCGACTTCATGTACGAATTGATCTCGGGATTGCTCTTCCAAC  
AATCGAACGGCACCTCGTCTCCGCCAGATGAACGTATTGATCCGGGAACACTTGACAC  
GATCTCGGCGAATAAGTTGCGGAGGAACTCGTACAGAGCCGGATTCTGTCGGATTCATC  
GGGCCCAATTTACCATTCTGGCTTTCCCTTCACATC

>novel\_circ\_001308

AAACAAAGTATGATGGTTCGCCAACTGGAGGAGGAGCTGAGGATGCGGATGAGGGGG  
CCGAGCGTCGAGATGCAGCAACAAATGGAAGTTTTGTACAACGAGAACGAGCATCTG  
ACGCGAGAGATCGCCATACTTCGCGACACGATTAGGGAGCTGGAATTGAGAATAGAGA  
CACAGAAGCAGACACTGCAAGCTAGAGATGAAAGCATCAAGAAGCTGCTCGAGATGC  
TCCAAAACAAAGGGATGGACAGCTACCGTCCGAAAATCTGGATTCCGAGCAGACATCC  
CAAGAGCTTCTCGTTGCTTTCTGCTGTTCCAGGAAAAGAGGAGGAAAGGATCATGTTT  
CAGCAGATGCAGTCGATGGCCAGAAGCAGACACGTTCTTGCCCATCACGACATACCG  
CTATCATGGCCATTCTGTCGTAATCGATGCACGAGCAGCGGGACGGTCCGAAAGTCGTC  
AAGTCGCGTCAAGACGAGCCGATCCCAGGCCCAAGGGAGGACTTTGCGACTGTTTGG  
CACCGACCTGATGCGACATGCGATAATACGACGTCGTTCTCCTCGCGAGCTCAAAGCG  
ACGAACGAGAGCCTGAAGAGCCTGCAGACGCAGCTGGAGTTGGCGTACGCGTCGACC  
GCGTCATCCGGGGCAGCCGTGGCGGGCGGAAGCGCTGGTCTCGGGGCTAGGTAGCGTAT  
CAGGTGCAGGCGGTACCGTCCCTGGAGGTAGCGTGGCGGTTCCAGGCGGCGTGCCCCG  
GTAGCACCAACCTGACGGCCATCTTGAGAGACAAAAGACGCGCGCATACAAACCCTGG  
AGAAGGAGGTGGCTTTGCTCGAGGCCGAGTTGCAACGTATTAAGGAATGCGGCGGTA  
GATTAAGGGAGCAGCTGTTGAAAGCGACCGCTGTGCCGAGTAGTAGCGGGGGCGGTA  
GTGCGCAGCAGCAGCAAACGATAACGCAACAACAACAGACGCAACAACAGCAACAA  
CAGCAACAACAGAATAAGGTTGCCGTGGGAGGTATCGAGTCGCAGATGCGGCAGGGG  
TTGGTGACGGCCATGGGTGGTCCGCAGCAGCCCGGCACGTTGGCCTTGGCCAGGGGA  
CCGTCCGTGATGACCTCGCTGGTACCGTACGGTCACACGTCGACCTCGGCATTAACCA  
GTTTATTGCTTGCCGGTTCGACAGGTGGGACCACGAGCGGCGGAGGCGGTGGGGGCG  
GTTCTCGTGCCTCGGCGGCATCTCGTCGGGCGCTACCACCGGCGTGGTCAATCCCTAT  
ACCGATCGTTACGCGGATCATCATCTCCATCAGCTTCATCATCACCCCTCATCATCAT



>novel\_circ\_001309

```
>novel circ 001310
```

CTGGACGAGCTACGGATGGAAGTGCAGCGTAGGGATCAGGAGCTGCTCGCCATGTCCG  
CGAAAATGAAAACCCTCGAGGAGCAGCACCAGGATTATCAGCGGCACATCACTGTGCT  
CAAAGAGTCGCTCGCCGCCAAGGAGGAACACTACAACATGCTGCAGGCTGACGTGGA

GGAAATGCGGCAGCGGCTCGAGGAGAAGAACCGGATGATCGAGAAAAAGACGCAGG  
CCGCGATGCAGGCGCAACAGGAGCGGAATCGTATGAACACCGAGCTCACCGAGCTCA  
AGGATCATATGGACATTAAGGACAGGAAGATCAACGTGCTTCAGCGCAAG

>novel\_circ\_001311

GTGGACTTGACGAAGCGAACAAGAACTGCAAGCTGGCGCCGCGAAGGCTGGTATC  
GATACTACTCAAGAGAGAAGACAATTGGAGGAGCAGAAACGCCAACTGGAAGAACA  
GAGAAGACAGACGGAAGAACGAGCGAAGTCCGTAGATCAGAAAGCTAGAACGATAG  
AGGAGAAGGAGAGGACGCTCCAAAGTCTCGACCAGGATTTGAAGAAACGGAAAGCG  
AAGATGGATCAGTTGGAGCAGCAGTTACAAAGGAGCGGTGGCTCGCCGGACAAGAGA  
TTGGCGGAAATGCAGAAGGCTCTGGAAACTGCCGAGAAGGAATTGAAAAGGCGAA  
AGAGGAATCGACCAGAAGCTCTGCCGAGACCGAAAGGTTGCTGCAGCTGATGCAGAT  
GACCCAGGAAGAGCAGAATGCCAAAGAAAGACAAATCAGAGAACTTCAAGATGCACT  
CAAAGCCGCACAAGCCAAGTTGAAACAAGCCGCAACTGCACAGCAACAAGAG

>novel\_circ\_001312

GGTGCTTACCATCAGCTCGGATCTGCCCACCGTACTCCAAGTGTTGAACGAGGTCGTA  
CCTAATCTCGAGGAGGTGAGTGTTGCTACCAGAAGAGGATCACACGGGAAAAGAAAT  
GACTCAATCAACGGATCTCGACACGGGAGCGACGAGATCGACGTGCGCATGCTGGTG  
CATCAGAGCCAAGCCGGATGCATAATCGGCAAGGGAGGTTTAAAGATCAAGGAGCTTC  
GCGAG

>novel\_circ\_001313

AAAACCTGGGGCAAGGATCAAGATTTATTCTCACTGCTGTCCCCATAGCACTGACCGGC  
TGATCAGCATCTGCGGAAAACCGACCACTTGCATCGAGTGCATTGCGGAGCTGATCGC  
CACTATTAAAACCTCGCCTCTGAAGGGAGTGAACAACCCTTACGATCCGCACAACCTC  
GACGACTATTACGCGGACGACTACGGCGGCTATGGGACCGGGCGACGGCGGCCAAGGG  
AAAGGGGGTGGCTTCGGGGGTCCTGGGGGGCGCGGCGGTGGCGGAGGCGGCGGCGG  
CGGCGGGGGTATGCCACCCCGACGCGACAACCGCGCTGGGCCGGGCGACATGAACCG  
CGGGTTCCCGCCGCCACCGAGAGGTGGGCCGCGCGGGGGAGGCGGCGGAGGCGGTG  
GCATGTCTGGCGGGCCGCCTGACCGTGGCTACGGGGGCAACTCTCGCGGAGGAGGCG  
GGGGTGGAGGGTACGAAGGCGGACGAGGCGGATACGGCGGCAATAGGGGTGGCCCCG  
CCCCGTACGCCGCTGGAAATTACAATG

>novel\_circ\_001314

TGGGACAGTTCGGAATCTGAATATTCGGAGCCTGAGGAGTCAAATGAGTTAGGGGCCA  
TCGTAAGCCCCGAGATCTGCGCGATGGACACTGTGGACAGTGCAGCAAGCGGCAAG  
CTACTCGTGTCTTCAAAAAATCCAGCCTTAATGGAAAGATCACGGTATACCTCGGGAAA  
AGAGATTCGTGATCACATAACTCACGTGATCCTATCGACGGGGTCGTGCTGATCGA  
CCCGGACTACGCGAAGGATCGCAAGGTTTTCGGCCACGTGCTGGCCGCGTTCAAGTAC  
GGGAGGGAGGACCTGGACGTTCTCGGGCTGACCTTTCGAAAGGATCTCTACTTGGCGG  
CCGAGCAAATCTATCCCGTGGTGGCTGGCGCCCAGCAGAGGAAGCTGACGCGGTTGC  
AAGAGAAGCTGATCAAGAAATTGGGGAGCAACGCGTACCCTTTCTATTTGAGTTACC  
GCCTCATTGCCCTGCGTCGGTCACGCTGCAGCCGGCGCCAGGCGACACCGGGAAACC

GTGCGGCGTCGACTACGAATTA AAAAGCGTTCGTAGGTGAGACGCAGGACGACAAACC  
GCAGAAACGAAACTCGGTGCGGCTCGCGATACGGAAGATCATGTACGCGCCGTCGAA  
GCAAGGCGAGCAGCCTTCCGTCGAGGTGAGCAAAGAATTCGTCATGTCGCCGAACAA  
GCTTCACCTGGAGGCGTCGTTGGACAAGGAGCTGTACCATCACGGGGAGAACATTGCT  
GTGAACGTGCACATAGCGAACAACAGCAACAGGACGGTGAAAAAGATCAAGGTGTCG  
GTGAGGCAATTCGCGGACATTTGCCTCTTCTCGACGGCGCAGTACAAGTGCACGGTGG  
CCGAGGCCGAGAGCGA

>novel\_circ\_001315

TGGGACAGTTCGGAATCTGAATATTCGGAGCCTGAGGAGTCAAATGAGTTAGGGGCCA  
TCGTAAGCCCCGAGATCTGCGCGATGGACACTGTGGACAGTGCAGCAAGCGGCAAG  
CTACTCGTGTCTTCAAAAAATCCAGCCTTAATGGAAAGATCACGGTATACCTCGGGAAA  
AGAGATTCGTCGATCACATAACTCACGTCGATCCTATCGACGGGGTCGTGCTGATCGA  
CCCGGACTACGCGAAGGATCGCAAGGTTTTCGGCCACGTGCTGGCCGCGTTCAAGTAC  
GGGAGGGAGGACCTGGACGTTCTCGGGCTGACCTTTCGAAAGGATCTCTACTTGGCGG  
CCGAGCAAATCTATCCCGTGGTGGCTGGCGCCCAGCAGAGGAAGCTGACGCGGTTGC  
AAGAGAAGCTGATCAAGAAATTGGGGAGCAACGCGTACCCTTTCTATTTTCGAGTTACC  
GCCTCATTGCCCTGCGTCGGTCACGCTGCAGCCGGCGCCAGGCGACACCGGGAACCC  
GTGCGGCGTCGACTACGAATTA AAAAGCGTTCGTAGGTGAGACGCAGGACGACAAACC  
GCAGAAACG

>novel\_circ\_001316

GTTCCATTTACTAACATTGAGAACGGCCCTGCGAGACGATATTTACGATAATTCAACCG  
ATAATGTTGCAAATATCGATTCCACTTCGTACGGGTGTATCGCCTTCCTGTTTAAAGAC  
TTCCGCTATGTGCTCGGGTCTACAGCAAGGAACAAGGGTAAATAGGCAAAGATGTAAT  
TATAGGCGAGATTATCGAAAATTATTACCTGGGAAAAGGTTACCTGTGAATCATGACAAT  
ATCTCCTGAAAGAGGGCCCGTTAATCCTCACGATGCAACCGTATTCGTTGAACAAGTATT  
TTAAAGGTGTGATATTGCGATTCCACGTTAACCGTCCTGAAAATGGCTCAATTGAAATT  
TAATAATTTATCTTCACAAAAAAAACAAAACCTATCTCAAACCTAAACAAACGAGTTTCAC  
GTGATTCTTTTTTTTTCTCTCTTTTTCTTTTTCTTTTCCGATTGTTTCAAAAAATGGAAAA  
TCGCGTAATTCGAAATCCGAAGAGCAAATGAGAAATTTTCTTCTTAACCTTTTCTTTACA  
CGATAGATTCATCGATCATTCTTCAGATGATTTTCTTTTTCTTTCTTTCTTTCTTTCAA  
CTTTTTTCATCGATACTTTTTTTTTTTATTATTATTAGAAAAAAGATCGGGCTCTTCGCATT  
TCTACCTATCGATACTTCAACAGATCGTACCCTGGGTGAATCTGTTGATTAGCAGACTG  
GAAAGCAGTTGCGTACCGAGGAGCGGCACGTATTTCCAATATTTCTCCCAGATCTTAAG  
AATCGCCGGTCCAGGGATCTCGTCGAAGGGCAACGGCGCTTTGTCAAAGATCTGCGTG  
TCGACCTTCATCGTGGATACCTCGAACGTGGTTCGGTGACACCTCGGTAGTCGCTGTATG  
GTCCAACAGGGGAATCGTGTCC

>novel\_circ\_001317

TTGGATGAGGCTTAGAATGCTGATCGATCCGAATGGAAAAGTTCCGGTGAAAGTGGTC  
GCGAGAACTTTCGCATCTGGGAAAACGGAAAAGCTTGTTTATCAGTGCCTCGCCGATT  
TAGGTCTATCCAGCGGGAAGAACGATGTGATCGAGCCTGAAGACTTCACCTTCGACGC  
TTTCTACGCGTTGTACCATAAAATCTGCCCTCGAAACGACATAGAGGAATTGTTCCAAT

CCATCACCCAGGGCAAAGCGGACACGATCAATCTCGATCAATTGGTCATGTTCTGAA  
CGAGAAGCAACGAGATCCAACGTTGAACGAGATCTTGTACCCGTTGTACGACGAGAA  
GAGGGCGTTGGAGATAATAAACGATTACGAGCAGAACGAGATAGCGAGGAATCAAA

>novel\_circ\_001318

GTGTCAGAATGTTCAAAATCGGAGGGGGCCGTCGTTGTCCACCTCGCCGGGATCGGACT  
TCTTGACGTCGCCCCTCATCGTTTCGGTCCCTCTCACGTCCCGCCATTTCTCGAGGACG  
TCCTCGAGGGCGTCCCAGAACTCGTTGCAAAGCCCGAGCAAGAGTACCGGCTCGTCC  
CCGCCGAAAACCGGCAGCTCCAACCTCCCTGAACAAGTTTCACAACCGTTTGGTGGAC  
AAGCTGAAAAGGTCGTTGAAGAAGGCTGAGGACACGACGGAGGATCAGAGAAATTT  
GTCGTGAAACGGTCAGGGGGTTTTTGGGCCGGCCACCGATTCCCGGCTCGAAACCGATC  
GAGATAAGGCGCACCTCCGCACCCGTTACCGCGTCCGCGACCATCTACGAGGGGGTTG  
TACGATCCTGCCCTGATCAATCGTCCTCGGCATGGTAGAGCACGCACGCGGAGAGAGA  
GAAACGCGACGACAATATAACGATAACAAAGTAGCTGGCAACAACGAGACAGGATCG  
GATCAAAATAATAATCCCCCTTCGATTCTGTTTACGGGTAACAACAACAACACCGATAA  
TAACAACAATAACAACGACGAGGACGATCGATATTTACGCGTGAAACCATGCTTGAAA  
CGTGACTCGAAGAGAGGAGGAGAAAGTGGCGCGATCTTTCGCGAGAAGAGGAGAAC  
TTCGATCGCGGGAGAAGAGAAGGAGGAAGAAGAATCGGAAAGGAGATCGACAAAGA  
TGCGGAAAGATTTTCGTGAATGATGTTCTACCAGCCGAATCCTCCGGTACCTGTACGT  
TTCTAACCGCTCTCTTCTGCGTTTCTTTTTGTACATGCCGATTTACAGTAATTGAGAAAC  
TGTAACGAGATTTTTATCTTTTTTTTTTTTACTTTTTTCGTTTCTTTTTTTTTTAATCTCCCT  
TATTTTCGGGAAGAAGTCTGGATGAACGAGCCACGAACGAGTCGGGAAAATTTTAACTT  
TCTTATTTTCGATTTTCGAAATTGAATTATCGTTCCGAACGAAATGAACGGGATTCTTAT  
TGTGGATAATTGTTTAGGATGACGAAGATATAGAGAAAGAGAGAGAAAGAGATAGAGG  
AGAAAGAAGGAGAAAGAAGGAGGAGGAGGAGAGAAAGATATGCGGAAGAGAGCGA  
GGGGATTAATGAACGAATTAGAAACGAGCCTCCGTCCACTTATACGCGGAAGCTCCTTT  
GTAACAAAAAAGGAAAGGACGAGGGAAGGACAACGAGGAGGTGGAAAAAACGAG  
CGACGAGAGAGAGATCCAACGAAAGAG

>novel\_circ\_001320

GATTGAGGAGGAGCAGCAGGCTCCGGAGGAGGTACGCGAGGCAAGCGAGATCGTCG  
AGCGCCACGAATCACCGTCAACCGTCCACCCTGTGCCCCTGTTGCGAGCGGATGTACA  
AGATGAACAGGAGCTTGACCACCCACATGAAGTACGATTGCGGCGAGCAGGCGGCCGA  
GCTTCGCGTGCCACATTTGCTTGGCCACGTACGGGAAGAACATCAAACCTGCGCAGAAT  
CGGCATCGCGAATCGCACATCGGGCAACGAGAAACAATCCAAGGGCAAACGCGGAAG  
GATTCACGTGCCACCAGTGCGGCAGATCCTACCAATTGAGGCACAATCTGGTCAAGCA  
TTTGAGGTTTCGAGTGCGGTGGCCAGAAACACTTCACCTGTTACCTGTGCCCGGCCAGA  
TACACCCAGAACGGCAAGCTGAGGCAGCACATGCTTAACGCGCACAATATTTTCGTCC  
CACCGCGCAGAACGTGGATAAGATCCGCCACGGTTGAATTACAATAACAATAATAAC  
AATAATACGCGGGGAGAAATGGAAGAGAAAAGAACGACTGACTGACGAGGATAATTC  
GAAAGGGGATAATCGTGAAATTTCTGCTCATCGTGTGTAATAAATTTAGATTTAAAG  
AGGCAATAAATCGTCGACGAATGCTGGCTGCGTCCCTTTTCATATGCCGTCACATTTCTT  
CCGTTTGGATTTTCAGCACCTCTTTTTCTCCATTCTCGAAGAGGGCTCGAAGAGAGTAT  
ATTTTTCCAGATTTTCCCCTCAGAGTATTCAGGATCTGATATATTTCGTCTGGAAGATT

GGATTCTCATCAACGAAGAACGGAACAAACGAAGAAGAATCGGAAAGCAGCGACAG  
GAAGATGGACGAACGAAGTCAGCCATCGAAGATATCCCGCGTCTATTTCGTCCCCCTTAC  
CCTTACTTTCCCCTTCCCTATGTTGAATTGAATAAAGAATTGAATAAAAAAATTTTGATC  
TACCCTGATAGTTACGTGAGCTTTTCGATTCCCCTGCCAGCAATGCGGACGGGGATACAC  
GAGGCGGTGCAACTTGAGGAGGCACATGAAATGGGAATGCGGAGGGGAAACGCCAGTT  
TCCGTGTTACTACTGCAGCTACAGTTTCACTCAGAAGACGAGCCTACACCGTCATCTGA  
TCGCTATTATAAGATAGATATTGTCAATGGAGTAGAGCCTAATCTTATGTTGTAAACGA  
TCTCGCGACATTTTTTTTTTCTTCTTCTCCCTTCTCCTCTCCTTCTCTCTTATTAAT  
TTTCAACGAGAATCCTCCATCCTGTGACAACGATCTATCCCAAGGATTTCGTTCGGATTTCG  
CTTGAAAAGGAAGAATCGTTAACCCTTCTCCGTTTCATTTAACGGATCAGAAAAAAA  
AAGAAAGAAAGAAATGTAATCCTGTGCCTGTACCTTCACCTTTCCAAAGTAAACGAGG  
CTTCGAATCCTCCTTGCCTGCCTACCTGCCTATCCGCCTGCTTGCCTGCTCCCACTTTGC  
GAGTTTTATCCATTTTTCTCCCATTAATATATATATACATACACACATATATATATAT  
ATATACACACATATATATATTTTGTTCATCTTTCTCGACACGCAACGACCGGATGCGG  
TGAAAGGAAACGGCCGGGGGATGGATTATCCCCCCCCGATTGGAAAAGGGAATCGAA  
GATTTGACGATTTCCTTGGATTATTATTGTTGAATCGAGAGAGGAGCGTAAACGCCTC  
TCGCGTTTTTTCGGCCGTTTCTTGTTCGTGATTAACGCGAATTTCCAATTGTTAATG  
TTCTTCTAGGTATTGTATAGCGAAGATGACCCCGCCCTTCGACGATTCTCACGAAGATT  
CAATGGCGAGCAACGTCCATTCTCTCTCTCTCTCTCTCTCTCCCTCACACTCTGGCAAG  
GAAAAGAGAAGAAGCATCGAGAAGCTGCCACGTGCGATCTCGAAGAGAAGAACGGATT  
CGTCGAAGGGAGGAAGATGGAGAAGGAGGAATCGATTCTCGAAGAAGAAGAAG  
AAGAAGAATCTTCTCATTTCGACGCGCCAAGAATTGTTTTCGCTTCAAAATTTGGGGA  
GGGAGAGGAGGAGGAGGAGGAGGAGGGGTCATCTCGGCTTCTTCCTTCCTTGTGTT  
GGTCGACGGATATCCCGTTTCGCTCGAAGATTGAATCGCCCGAATCGAAGATGTGAATC  
GTCGGGGCCCGATTGGTGATCAACGATGGCGTCGCGACGAAGAGAAAAAAAAGCC  
TGCTGCGTACATCTATCGAAGATAAGAGCAAAACGGATTACCAAGTGTATCCAAAGTGT  
CCGTACCTGCGATCGATCATCTGCCGAACAACACGCCGCCCTTTAACCCGGCTATAAA  
TTGCTCCGGTTACTCGAGGCTTCTGTTTCAAGATTATCCCGGCGGGATGCCGGACGCGG  
ACAGGCCTTACAGATGTTGGAACGTGCGGCAAATTGTACACGCACAAATCCACGTTGAA  
ACGGCATCGCGAAACGGTCTGCGGCAAGATAAGAAACACGAACGGCAAGTGGAAGTG  
TCTGCGCTGCCCAGGTCCTATCGTTCCGAGGGGAATCTCGAGCGCCATCTACG

>novel\_circ\_001321

AATCGGCATCGGAATCGCACATCGGGCAACGAGAAACAATCCAAGGGCAAACGCGG  
AAGGATTCACGTGCCACCAGTGCGGCAGATCCTACCAATTGAGGCACAATCTGGTCAA  
GCATTTGAGGTTTCGAGTGCGGTGGCCAGAAACACTTCACCTGTTACCTGTGCCCCGCC  
AGATACACCCAGAACGGCAAGCTGAGGCAGCACATGCTTAACGCGCACAATATTTTCG  
TCCCACCGCGCAGAACGTGGATAAGATCCGCCACGGTTGAATTACAATAACAATAATA  
ACAATAATACGCGGGGAGAAATGGAAGAGAAAAGAACGACTGACTGACGAGGATAAT  
TCGAAAGGGGATAATCGTGAAATTTCTGCTCATCGTGTGTAATAAATTTAGATTTAA  
AGAGGCAATAAATCGTCGACGAATGCTGGCTGCGTCCCTTTCATATGCCGTCACATTT  
TTCCGTTTGGATTTTCAGCACCTCTTTTTCTCCATTCTCGAAGAGGGCTCGAAGAGAGT  
ATATTTTTTCCAGATTTTCCCCTCAGAGTATTCAGGATCTGATATATTTCGTTCGTGGAAGAT  
TGATTCTCATCAACGAAGAACGGAACAAACGAAGAAGAATCGGAAAGCAGCGACA

GGAAGATGGACGAACGAAGTCAGCCATCGAAGATATCCCGCGTCTATTTCGTCCCCCTTA  
CCCTTACTTTCCCCTTCCCTATGTTGAATTGAATAAAGAATTGAATAAAAAAATTTTGAT  
CTACCCTGATAGTTACGTGAGCTTTTCGATTCCCCTGCCAGCAATGCGGACGGGGATACA  
CGAGGCGGTGCAACTTGAGGAGGCACATGAAATGGGAATGCGGAGGGAAACGCCAGT  
TTCCGTGTTACTACTGCAGCTACAGTTTCACTCAGAAGACGAGCCTACACCGTCATCTG  
ATCGCTATTCATAAGATAGATATTGTCAATGGAGTAGAGCCTAATCTTATGTTGTAAACG  
ATCTCGCGACATTTTTTTTTTCTTCTTCTCCCTTCTCCTCTCCTTCTCTCTTATTAA  
TTTTCAACGAGAATCCTCCATCCTGTGACAACGATCTATCCCAAGGATTCGTGCGATTTC  
GCTTGGAAGGAAGAATCGTTAACCTTCTCCGTTTCATTAAACGGATCAGAAAAAA  
AAAGAAAGAAAGAAATGTAATCCTGTGCCTGTACCTTCACCTTTCCAAAGTAAACGAG  
GCTTCGAATCCTCCTTGCCTGCCTACCTGCCTATCCGCCTGCTTGCCTGCTCCCACTTTG  
CGAGTTTTATCCATTTTTCTCCCATTAATATATATATACATACACACATATATATATAT  
ATATATACACACATATATATATTTTGTTCATCTTTCTCGACACGCAACGACCGGATGC  
GGTGAAAGGAACGGCCGGGGGATGGATTATCCCCCCCCGATTGGAAAAGGGAATCG  
AAGATTTGACGATTCCTTGGATTATTATTGTTGAATCGAGAGAGGAGCGTAAAACGCC  
TCTCGCGTTTTTTCGGCCGTTTCTTGTTCGTGATTAAACGCGAATTTCCAATTGTAA  
TGTTCTTCTAGGTATTGTATAGCGAAGATGACCCCGCCCTTCGACGATTCTCACGAAGA  
TTTCAATGGCGAGCAACGTCCATTCTCTCTCTCTCTCTCTCTCCCTCACACTCTGGC  
AAGGAAAAGAGAAGAAGCATCGAGAAGCTGCCACGTCGATCTCGAAGAGAAGAACG  
GATTCGTCTGAAGGGAGGAAGATGGAGAAGGAGGAATCGATTCTCGAAGAAGAAGAA  
GAAGAAGAAGAATCTTTCTCATTGACGCGCCAAGAATTGTTTTCGCTTCAAAATTTG  
GGGAGGGAGAGGAGGAGGAGGAGGAGGAGGGGTCATCCTCGGCTTCTTCCTTCTTGT  
TGTTGGTTCGACGGATATCCCGTTTCGCTCGAAGATTGAATCGCCCGAATCGAAGATGTG  
AATCGTCGGGGCCCGATTGGTGATCAACGATGGCGTCGCGACGAAGAGAAAAA  
AGCCTGCTGCGTACATCTATCGAAGATATTTGCACGCCAAAGAGATCGAATCGCGCGA  
GATGGACGGTTGTTTTTTTTTCTTTTTGCACAGATTTGTTTTTTCTTTTTCTTTTTT  
CTTCTTCCGTTTTTTCATTCTGTGCGCGTTGATCCGATTTTAAAGCACAAATTATTGTATC  
ATTATATCGTAGAATTATCGATCGTTGAATTTTTTCGATACACGTTGTAAAAGATTCGAAG  
GCTGGACACGTTTAACGATTTCAACAATTGTCGTTTTTCGTTTTATTAAAATAGTATATTA  
CACATCGAATATTACAATTTTAAAATCGTCTCTCTAGAACCGTCGATAGTAGATTTGATG  
TGCCATCGAGAGTGTCTAGAAGATAGATGATATAAATAATAAGTAAATAAAAAATAA  
ATAATAAATAATAACAATAATAATGATGATGATGATAATAAAAATTTTACCGAAACATCTT  
CTACCTGTTTACCACCAAAATGGATGCTCTCACTCAAGAAGATCAATCACATCCAAGAT  
AATTTGTATTTTCGTTTTCTTTCTTAAATTTTATAGAATATTTTTCTTTTTTTTTCTTCTT  
TGAAATGGAATTTCTCCTTTTATATTCAATTACACAATGCGTACTCTTGATCGACGTCG  
TCTAGTATCGAAGATATTCGTCCTGCGTGTCATTTCAAGTGTACAA

>novel\_circ\_001324

TGGATCGTTCGTTTTGCCTGGTATACGGGAATTACGGAGCCGATTCGTATCAGGAGGCG  
AGGAAATATCAGGGATCGGGGATCGGGGACGTCACGGATCGCTTCGACGGAGAAGA  
AGCAAGAAAAAAATTACGTGTGTCCAAAGTGTGGGAACGGTTACACCGTGGTGAAG  
AGTTTGAAGCGCCATCTGCGTTACGAGTGCGGCGTAGCGCCGAGGTTCAAATGCCCCGT  
ACTGCGGCACGCGCAGCAAGCAGAGAGCTCACGTGAACGAGCATATACGTAGGAAGC  
ATTCGGGACAACGGATCTACATTATCGACTCGCCTTGATCTGTGACGGGCTGCCGTACA

CAGTAGATATACCCATCGAATAATCGACTCCTCCGTCTTCTCTTTCCACGATATTAGGATT  
AGGACCGCATCTCGCCAAG

>novel\_circ\_001325

GATTCCATATTCTACCGCCCCCGCTCGGACAAAACGTAATCTTGAAGAGCCGATCGGGA  
GCAATGGGGAAACGTTGTTTGGAATCGGTCTGGGAAAACGGTGAAACGGAGGGGCTTA  
AAGATAAACGCCTCCGACAAGAAGAAGCCGTTTCAGTGTCAAAAGTGCGGTTCGCGGT  
TTCACCTTGAAGAGAAACAAAGATCGCCACGTGAATTACGAGTGCGGCCACGAGCCA  
AGATTTTCAGTGCCCTTACTGCGGACTGAGGAGCAAGCAAACGTCGCCCCTCTACGCCC  
ACATCAGGAAGAAACATCCTGAAGAGGAGGTGTTTCATCTTCGACATGAAGCTGTGAA  
GATTTTCGAAGCCCGAATTTTCATTTCTCGCTCACTTTGCCAACGATCGCGTCCATCCATC  
TCTTATAAAGTCTGCAGTTGTTTGCCAGTGTGTGCTCTAAAATACTCTCCTAAATTATTC  
TTCTCCGCGATTGTTGTGCTCTCGACAACAAATTAATCAATCCGCTTTTCCGTTAGA  
GATCTCGTGTCTTATTTTCGTGTCAACGTCTCGGATCTCGCCCCATCTGAGAGCCTGCCG  
AGAATTCCATTTTTTCGGCAAACGAAATTTTCGAGAAAGAAGAGATTGAATCCATCGAG  
TTTTATCGAGGATATTTTCGTGTAAAAAAATTAAGAATAAAAAATAAACTTTACTTTTTTT  
TTCCAAGTAAGATATGCATGCTTGTTGATGCGAAAGAAAAAAAAAAAAAAAAAAGA  
AAAAAAGAAAAAAAAAAGAAAATATATAAACGCAACGATTCTTCGTAGTTTAATCCTC  
CTCTTATGCGAATTTCTGCTAGAAAAAAGAAAAAGAAAAATGAAAAAAAAAAGAAAAA  
AAAAAAGATTGTTTCGAGTACCAACCTTTCTTACGCGTTTTTTTTTTCGGTGTCTGAAACG  
GATAGCCGAACAACAAGGATGTCCTCACCACCTGAAGATAAATGGTACACAACGATCT  
TCATTCCGGTAGTTTTTAATAATTATCGTTAAAACGTATAGATTAAGACGTATTTTCTTCT  
TATAGATATATATATATATATATATATATATATATATATATATACATACAAACATACATATATA  
TATATATATATATATATATATATATATATATATATATATATATATATAGTTAATTGAAAAAAAAAAG  
TTCATTAATAATCGCGCTTTTGAAATTGAAAAACGAAAAAAATTGCAAAAAAAAAAAAA  
AAAAGAAAAAAAGAGTGAGCTCTCTGGAATGATCGATATGATGGCTCGACGTTTTTC  
ATCTAGAAGATCATCCGCAACTTGTTTAAG

>novel\_circ\_001326

AATCGGCGCGAGGAAGCGGACAAGCGACGAGTAATAGTAATAGCGACACCGGTTGGG  
GACGGGGCGGCGAGGAAAACCGACGACACCAGTGTCCCAATTGCTCGCGGAGCTACA  
AACATCGTAGCCACATGATACGCCACTTTAAGTACGAGTGCGGGACGCCTCAGAGATT  
CGAGTGCCCTTACTGCAAACATCATCTCCGCCAGCGTACCAACGTGTGGACCCATATAC  
GAACGTTCCACCCGAGATACGAGCTTTACTGCATCGATATCGCGACCAACGCGAAACT  
CTATCACCAGGAGCAGTATCGGACCGATTGATTTCGATCGATTCAAATAATAATCGATCGA  
ATTAATCTCGTCTTCTCTCTCTCTCGTCCAGAAACGATTTCCATTAACAATAAGGGGAC  
ACCTGTGGAGGAGATGTTCTTCTCGAATCTCTTCGTAATCTATTTTTTTTTTCTGAGGATT  
ACGAAGGAAGATGCTTCGAAGGAATAAAAACTAATCGATCATCGATATTCAAAGCTC  
CTTAATTGTTTTTTTCTTGACAATGGAGGAATATTGTGATGATATTGTTGATGACCTTCTA  
ACGTGTATAAGTGTACGTTCTCCGAGTAAAAGGAATCGACGGTTAATGGAAGAGAGGA  
CCGCAGGTTTGTAGAAAGAAAGAAAGATAATAGGGGTGTGAAAGAGAGAACGGAGGT  
GGAGCGATTCCACGCCCCGTTCCGGCCGCGTGTTCACTATCGTGAGGCGGGACGGGATG  
TACGAGTGCCCGAGTTGTCGCAACCTCTACAAGTGGAAGAAGTCGATGCTCTCCCAT  
TGAGGAACCAGTGCAAGCAACCGCCCCCGTTTCAATGCCCCCACTGCACGATGAAGA

ACTACCAGAAGTCGCACATGATACGCCACTTGCGGGTCCACCATCCCCAGCTCAGCCA  
AACGTTCTGGGATCGGAAGCTGAACGGTTTCTTCCGGCTGTAAAGAGAGAGAGAAAA  
GAAGAACTTTGATATGATAATCGAGCGATCTTATTGTCCTTTACCTCCGATCGAAATATT  
TCAAATATTTTATTGCGCCCAATAATAAAAAAGAAAAAAAG

>novel\_circ\_001328

GTAATTACCAAGGGGAGCGTTACAGCGTGAAGTGGAACAACATGGGTTATGTCGGTTA  
TACGTCGGAGAAAACTACTTGGACAGGTATAGATATCACCCGAACGAGCGTAAAAGG  
TTCGAATGCCTCAACTGCGGATGTCGTTTCACCCAGAAGACAACAATGACCAGGCATT  
TGCCTACTTTTGCAGGACAGGGGCATCGTTACCAGTGCCCTTACTGCGAGATGAAAGC  
CTCGTGCTCGTCCAATATATACAGACACGTGAGATCGAGACACGCCGGATACAAAGCT  
CACGCCATAAACTCTTCTCCTCGATCAATCCCCGTAGAAATTTAGAAACCATGTAAAA  
AAAAAAAACAAAAAAACAAAAACAAAACCTAAAAAAAAGCGGACGATATCTCCGAA  
ATTTGGAAATTTCTGTGTGTTTTTTGACGCGAGGAAAAAATCAACGAATGGAAAAGTG  
CATTCCAGGATAAATTTACCATTCTCGATAAACCAATCGAAGCATCGAACGATACTAGG  
ATAAAAATAGAAAGAGAGAGGCGAATTCTAATGGAAAGATGATATTCAACCTGTCCAC  
ATTGCCTTACCTGACCGTTGTGGGTACGGCGGAACGAAGGCGGAGACGGTACAGCGG  
CGGTATCCATCAGCCTGTGAACACAGCCTCCCGTGGAACCTTCGAATGTCCAAAGTGT  
CAGAAGACCTACAAGTGGTATCGCGGCCTCCACAGGCATTTGAAGTACGAGTGCGGTA  
AGGCGCCCCGTTTCAAATGCCCGCACTGCATGTACACAGGGAAACACAGGTCGCACGT  
GTACTCGCACATCAAGAGCAATCATAGCAATTGGCCGATATACGCTCTGGACACTCAAC  
AGGG

>novel\_circ\_001329

ATATACGGATATTGGAATGGCCAAACGTGAGGACGCAAGCCGGTGTCTCGAGTTACATC  
TGTTCAAAGTGCAACGCGGGATTCCGAAGGATGTGGGACCTGATCAGGCACAAAGTGT  
GGCCAGATCCCTAGATACGCGTGTCTTATTGCCATAAGAAGGACAACCTCATCTCGAA  
CGTTTACAGGCACATCAGACGATGGCATCTAAATTGCCAGTCGGTGTAACAAAATGT  
TTTGAACGGTGTCCCGAGATACTTTCGGTGAAGTATTATATAGTCTAGAACCATTAAAA  
AAAAAAAAAAGGAGAAAAAAAAAAGAAAATAAGAGAAGAAGAAGAAAAAAAAAAAA  
GTTGAATCGAACCGAATCGAATTTAACTGGCTACTTTTCATCCCTCGTTTTTCATACCC  
TTTCAATTTTTTACCTTCTCAATTTAATCGTTTCGATTTTTTTTTTTTTTTTTTTAATC  
CAAATAATAGCGTCAAGTTGTATCGGGTTGGATGGGTACGAGTACGTAATTTCCGTAA  
CGTGTGAATGCGTGATGGGAGCGTGTGAGCAAGGAAATCTCGTCTTCCGTCAGGATT  
CCACAGGAGGGAAAAAATCTTATCCATCGTTTCCTTGGTGTTCCTTGCCTTGATTTAGG  
TGTAACCTGTGTAAACAAACGCTTGATAGATTATATATCTACGCTTCAATCTACGGAAATC  
AATATTTTTTTTTTCTCTCACTTTCCCGATACGTACACGTGCACGCATACACACACAT  
GTATCGTACACAATGATATCGTACACACGTGCACGTATACGTATGTACACGTAGCGAGG  
GACCGCATAGAGATCGAAAGGGGGGACGAAATATCTCCCACTCCCCCCCCCCCCCTC  
CCTTTACCTTGCTAAGTCTCGAAGGTATCGAAGCTCTCGAGAACGTTTGCTCTACATAT  
CGTGTGTTGTGTTTTTAATTTTCAAGATGGAAATACTCGACGTCCCGTACAAGGACGAAC  
GCTATAGAGTGTTTGAAGTGCGGCAAGACGTTCCCCAAGCAAAGAGATTTGACGTTCC  
ACGTGAGGCACGCGTGCGAAGAGAAATACAAGATTCGTAGCATGAAAAATTCGGATGC  
GTATCTCTACGGCAACGATTTGGACTGCAATCGATGCGGGAAGAGGTTCAAAAGGCGG



AAAGATCTCAATTATCACATACGTCATTTGTGCGGTATACGTGGTATACAGTGTCTTATT  
GCAACAAATGTTACACGTATTCGTCCAACGTCAAGTATCATATAAGCCGTTACCACGAG  
GGGAAAGAGGTTTATTACAATAAACTTTTTTGAACCTAATTTTCGATCGGATCACCGCGA  
ATCATTTTGGCGTCGAGAAAAGAAAAGAACGCGGTGTTTTTTCCCCGAGCCGGTTCCT  
TTTCTAATCGTACGCTCGATCCCTCAAGCTTGCCAATATCTTCGTGCTCGTATCGTATCTC  
GCCGAACGAGGAATAACGTTTCGAATTTTCGAAACGAAACAATTCTTTTCGATTTTCGTTTC  
GAATTATATAGGAAAATTTTTCTCTCCTAATCGTACGATTCTCTTTCCGTTTCTCTCTTT  
CTCTCTTTCTCTGTCTCTCTCTCTCTCTCCTCTCTAGTCACTCGTCGCCACAGTCTGCTGC  
GAGCATTTCGAACTGCGTGTTTCGAAACCCCGGCGACGTCTCGCCGATATTCTCGCGAA  
CGAACGAATTGTAAAGGATCTCGTAAGCATAATGTAAACGTATTTGAAAATAAGTAATT  
ACCAAGGGGAGCGTTACAGCGTGAAAGTGGAACAACATGGGTATGTCGGTTATACGTC  
GGAGAAAAACTACTTGGACAG

>novel\_circ\_001330

ATATACGGATATTGGAATGGCCAAACGTGAGGACGCAAGCCGGTGTCTCGAGTTACATC  
TGTTCAAAGTGCAACGCGGGATTCCGAAGGATGTGGGACCTGATCAGGCACAAGTGT  
GGCCAGATCCCTAGATACGCGTGTCTTATTGCCATAAGAAGGACAACCTCATCTCGAA  
CGTTTACAGGCACATCAGACGATGGCATCCTAAATTGCCAGTCGGTGTAACAAAATGT  
TTTGAACGGTGTCCCGAGATACTTTCGGTGAAGTATTATATAGTCTAGAACCATTAAAA  
AAAAAAAAAAGGAGAAAAAAAAAAAAAGAAAATAAGAGAAGAAGAAGAAAAAAAAAAAA  
GTTGAATCGAACCGAATCGAATTTAAACTGGCTACTTTTCATCCCTCGTTTTTCATACCC  
TTTCAATTTTTTACCTTCTCAATTTAATCGTTCGATTTTTTTTTTTTTTTTTTTTTTAATC  
CAAATAATAGCGTCAAGTTGTATCGGGTTGGATGGGTACGAGTACGTAATTTCCGTTAA  
CGTGTGAATGCGTGATGGGAGCGTGTGAGCAAGGAAATCTCGTCTTCCGTCAGGATT  
CCACAGGAGGGAAAAAATCTTATCCATCGTTTCCTTGGTGTTTCTTGCCTTGATTTAGG  
TGTAACCTGTGTAAACAAACGCTTGTAGATTATATATCTACGCTTCAATCTACGGAAATC  
AATATTTTTTTTTTCTCTCACTTTCCCGATACGTACACGTGCACGCATACACACACACAT  
GTATCGTACACAATGATATCGTACACACGTGCACGTATACGTATGTACACGTAGCGAGG  
GACCGCATAGAGATCGAAAGGGGGGACGAAATATCTCCCACTCCCCCCCCCCCCCTC  
CCTTTACCTTGCTAAGTCTCGAAGGTATCGAAGCTCTCGAGAACGTTTGCTCTACATAT  
CGTGTTTGTGTTTTTAATTTTCAAGATGGAATACTCGACGTCCCGTACAAGGACGAAC  
GCTATAGAGTGTTTGAAGTGCGGCAAGACGTTCCCCAAGCAAAGAGATTTGACGTTCC  
ACGTGAGGCACGCGTGCGAAGAGAAATACAAGATTCGTAGCATGAAAAATTCGGATGC  
GTATCTCTACGGCAACGATTTGGACTGCAATCGATGCGGGAAGAGGTTCAAAGGCGG  
AAAGATCTCAATTATCACATACGTCATTTGTGCGGTATACGTG

>novel\_circ\_001331

ATATACGGATATTGGAATGGCCAAACGTGAGGACGCAAGCCGGTGTCTCGAGTTACATC  
TGTTCAAAGTGCAACGCGGGATTCCGAAGGATGTGGGACCTGATCAGGCACAAGTGT  
GGCCAGATCCCTAGATACGCGTGTCTTATTGCCATAAGAAGGACAACCTCATCTCGAA  
CGTTTACAGGCACATCAGACGATGGCATCCTAAATTGCCAGTCGGTGTAACAAAATGT  
TTTGAACGGTGTCCCGAGATACTTTCGGTGAAGTATTATATAGTCTAGAACCATTAAAA  
AAAAAAAAAAGGAGAAAAAAAAAAAAAGAAAATAAGAGAAGAAGAAGAAAAAAAAAAAA  
GTTGAATCGAACCGAATCGAATTTAAACTGGCTACTTTTCATCCCTCGTTTTTCATACCC

TTTCAATTTTTTACCTTCTCAATTTAATCGTTTCGATTTTTTTTTTTTTTTTTTTTTTTTAAATC  
CAAATAATAGCGTCAAGTTGTATCGGGTTGGATGGGTACGAGTACGTAATTTCCGTAA  
CGTGTGAATGCGTGGATGGGAGCGTGTGAGCAAGGAAATCTCGTCTTCCGTCAGGATT  
CCACAGGAGGGAAAAAATCTTATCCATCGTTTCCTTGGTGTTCCTTGCCTTGATTTAGG  
TGTAACCTGTGTAAACAAACGCTTGTAGATTATATATCTACGCTTCAATCTACGGAAATC  
AATATTTTTTTTTTCTCTCACTTTCCCGATACGTACACGTGCACGCATACACACACACAT  
GTATCGTACACAATGATATCGTACACACGTGCACGTATACGTATGTACACGTAGCGAGG  
GACCGCATAGAGATCGAAAGGGGGGACGAAATATCTCCCACTCCCCCCCCCCCCCTC  
CCTTTACCTTGCTAAGTCTCGAAGGTATCGAAGCTCTCGAGAACGTTTGCTCTACATAT  
CGTGTGTTGTGTTTTTAATTTTTCAGAATGGAAATACTCGACGTCCCGTACAAGGACGAAC  
GCTATAGAGTGTTTGAAGTGCGGCAAGACGTTCCCCAAGCAAAGAGATTTGACGTTCC  
ACGTGAGGCACGCGTGCGAAGAGAAATACAAGATTCGTAGCATGAAAAATTCGGATGC  
GTATCTCTACGGCAACGATTTGGACTGCAATCGATGCGGGAAGAGGTTCAAAAGGCGG  
AAAGATCTCAATTATCACATACGTCATTTGTGCGGTATAC

>novel\_circ\_001332

ATATACGGATATTGGAATGGCCAAACGTGAGGACGCAAGCCGGTGTCTCGAGTTACATC  
TGTTCAAAGTGCAACGCGGGATTCCGAAGGATGTGGGACCTGATCAGGCACAAGTGT  
GGCCAGATCCCTAGATACGCGTGTCTTATTGCCATAAGAAGGACAACCTCATCCTCGAA  
CGTTTACAGGCACATCAGACGATGGCATCCTAAATTGCCAGTCGGTGTAACAAAATGT  
TTTGAACGGTGTCCCGAGATACTTTCCGTGAAGTATTATATAGTCTAGAACCATTAAAA  
AAAAAAAAAAGGAGAAAAAAAAAAAAAGAAAATAAGAGAAGAAGAAGAAAAAAAAAAAA  
GTTGAATCGAACCGAATCGAATTTAAACTGGCTACTTTTCATCCCTCGTTTTTCATACCC  
TTTCAATTTTTTACCTTCTCAATTTAATCGTTTCGATTTTTTTTTTTTTTTTTTTTTTTTAAATC  
CAAATAATAGCGTCAAGTTGTATCGGGTTGGATGGGTACGAGTACGTAATTTCCGTAA  
CGTGTGAATGCGTGGATGGGAGCGTGTGAGCAAGGAAATCTCGTCTTCCGTCAGGATT  
CCACAGGAGGGAAAAAATCTTATCCATCGTTTCCTTGGTGTTCCTTGCCTTGATTTAGG  
TGTAACCTGTGTAAACAAACGCTTGTAGATTATATATCTACGCTTCAATCTACGGAAATC  
AATATTTTTTTTTTCTCTCACTTTCCCGATACGTACACGTGCACGCATACACACACACAT  
GTATCGTACACAATGATATCGTACACACGTGCACGTATACGTATGTACACGTAGCGAGG  
GACCGCATAGAGATCGAAAGGGGGGACGAAATATCTCCCACTCCCCCCCCCCCCCTC  
CCTTTACCTTGCTAAGTCTCGAAGGTATCGAAGCTCTCGAGAACGTTTGCTCTACATAT  
CGTGTGTTGTGTTTTTAATTTTTCAGAATGGAAATACTCGACGTCCCGTACAAGGACGAAC  
GCTATAGAGTGTTTGAAGTGCGGCAAGACGTTCCCCAAGCAAAGAGATTTGACGTTCC  
ACGTGAGGCACGCGTGCGAAGAGAAATACAAGATTCGTAGCATGAAAAATTCGGATGC  
GTATCTCTACGGCAACGATTTGGACTGCAATCGATGCGGGAAGAGGTTCAAAAGGCGG  
AAAGATCTCAATTATCACATACGTCATTTGTGCG

>novel\_circ\_001333

ATATACGGATATTGGAATGGCCAAACGTGAGGACGCAAGCCGGTGTCTCGAGTTACATC  
TGTTCAAAGTGCAACGCGGGATTCCGAAGGATGTGGGACCTGATCAGGCACAAGTGT  
GGCCAGATCCCTAGATACGCGTGTCTTATTGCCATAAGAAGGACAACCTCATCCTCGAA  
CGTTTACAGGCACATCAGACGATGGCATCCTAAATTGCCAGTCGGTGTAACAAAATGT  
TTTGAACGGTGTCCCGAGATACTTTCCGTGAAGTATTATATAGTCTAGAACCATTAAAA

AAAAAAAAAAGGAGAAAAAAAAAAAAAGAAAATAAGAGAAGAAGAAGAAAAAAAAA  
GTTGAATCGAACCGAATCGAATTTAAACTGGCTACTTTTCATCCCTCGTTTTTCATCACCC  
TTTCAATTTTTTACCTTCTCAATTTAATCGTTTCGATTTTTTTTTTTTTTTTTTTTAAATTC  
CAAATAATAGCGTCAAGTTGTATCGGGTTGGATGGGTACGAGTACGTAATTTCCGTAA  
CGTGTGAATGCGTGGATGGGAGCGTGTGAGCAAGGAAATCTCGTCTTCCGTCAGGATT  
CCACAGGAGGGAAAAAATCTTATCCATCGTTTCCTTGGTGTTTCTTGCCTTGATTTAGG  
TGTAACCTGTGTAAACAAACGCTTGTAGATTATATATCTACGCTTCAATCTACGGAAATC  
AATATTTTTTTTTTCTCTCACTTTCCCGATACGTACACGTGCACGCATACACACACACAT  
GTATCGTACACAATGATATCGTACACACGTGCACGTATACGTATGTACACGTAGCGAGG  
GACCGCATAGAGATCGAAAGGGGGGACGAAATATCTCCCACTCCCCCCCCCCCCCTC  
CCTTTACCTTGCTAAGTCTCGAAGGTATCGAAGCTCTCGAGAACGTTTGCTCTACATAT  
CGTGTTTGTGTTTTTAATTTTCAGAATGGAAATACTCGACGTCCCGTACAAGGACGAAC  
GCTATAGAGTGTTTGAAGTGCGGCAAGACGTTCCCCAAGCAAAGAGATTTGACGTTCC  
ACGTGAGGCACGCGTGCGAAGAGAAATACAAGATTCGTAGCATGAAAAATTCGGATGC  
GTATCTCTACGGCAACGATTTGGACTGCAATCGATGCGGGAAGAG

>novel\_circ\_001334

GGGCGTTGCCGTTGCCGGCCTACGACGAGTCGAGCGCCACGGACGGCCACGGCCACG  
GCCACCACCACCACCACCACCACCACCATCACCACCAGAGGGGGGCGACGGCCGAGT  
ACAGGGGAAGGAGGGGCCGCGATCAAGAACGAAGACGGCTCGTTCTGGAATTCTGGAA  
AGATGTCTTACCATTGCCCCATCTGTAACGCGGGATACACGTACAAGAAAACGTTGAA  
GACCCATATGAAGTACGACTGTGGCAAGGAGCCGAGGTTCAAGTGTCTTATTGCAGC  
AAGAGGGACAAGTGTTTCGTCCAACATTTACAAGCATATCAGGATGAGACACGACGGGA  
TGCCTGTGATCGTGCATAGGAATTAGAAAATTTATTCAATCCGTGGATCGTTGTAATTTT  
TCGTTTCCTTCCTTCTTCGTTTCGAATCCCCCTTTCCTCCTCTCCTTCCTCCCATTGGTA  
ATTCAGTGATGATTTCGAAGAGAATTGAAAAGAGAAACATCTCTCCGGAGAGAAAAGAG  
AAGAACGTTCGAGATTTTCGTTGGACGAAAAAGCGAGAATGAAGTGA AAAACAAAAA  
GTGAAAAAATGTTCCCTTGTAAGCTTTAGAAATTATAGAGGCTATACGTTCGAGGTAA  
TACGTGTGTAATATGTATATTTTCGATATTTTTCGCAGACAGATGTAAAAATTTTATGTTA  
GAGAAAGTTGATGAAGAACGAGAAAGAGAGAGAGAGAGAGGGAGAGGGAAAAGAG  
AGAGAGAGAAAGAGAAGAGAAGAGAAAGAAGAGAGAAAGAGCAGGACGAGAAAG  
AAAGGAAAGAAGAAGGGGAAAAGAGAGAAAAGAGAAAAAATTGGAGGAAGAATATTT  
CATCGA

>novel\_circ\_001335

GATACGCGAAGGAGCCGTCGAGGCAGTCGACGTGGTTCGAATCAGCCGGATCAAGTTC  
AGAGATACTTTTGCCCGAGGTGTTGCAGCTCGTTTCAGCAAGAAGGCGAACATGCTGAC  
CCATTTTCAGATACGAGTGCGGGAAGGAGCCCCGGTTCCAATGCCCTTACTGCGGCAA  
CGGGACAGAAAATCGTCCAACACCTACAGGCATATCAGAACGTATCACCAGGGTAGCA  
GGATACAAGCGTACAACTCTATTAACTCGTGTTTCGTGGCACGCGTCCATCCCAAGA  
AGGAAAACAAAACAAAACAAAAAATAAGAAGAGAAAAGAGAAGAGACTCTTAC  
GTGACGTAATATTGTACAATATTGCGATTACATATATATATATATATACAATTGTAGCTC  
GCGTGCCCGTGTTTCCTTCGTCTGAATGTGCGTGAAAACCTGACACTCGTGTGACTTGTGTA  
TGTACGTACGTGTGTATGCGCGCGTGTATACGAGATGTTAAAAATAGACAGATCTTCCTT

```
>novel circ 001336
```

TAACGAGGGAACGGAAGTACCTCGAAAAAAATGGAAGACGACCAGCAATTCTGCCTTAGA  
TGGAATAATCACCAGAGTACATTAATTCAAACTTCGACACGCTTCTCGAAAGCGGGA  
CGCTTGTCGACTGCACGCTGGCCGCGGAGGGGAAATACTTGAAAGCGCATAAAGTAGT  
GCTATCTGCTTGCAGCCCCTACTTCGAGGGATTGCTGAGTGAGCATTACGACAAACACC  
CGGTGTTTCATTCTAAAAGATGTAAAATTCAAAGAATTAAGCAATGATGGACTATATG  
TACAGAGGGGAAGTAAATATTTCCCAAGACCAACTGGCAGCACTTCTTAAAGCCGCTG  
AATCATTGCAAATTAAGGGTCTATCAGAAAGTAGAACAAGTGGTAGTAGTAAAACGGA  
CTTTAGGCAACAAAAAGTAGTTCCACAAACAACATCTCAAATGGACATTCCACAATCG  
TCTTCCGGTCTCACGATAGAAAAGAACAAGTTCCTAGGCAGGGTATGGCACAAGGTT  
CCGTAGGGGACCTGCCCCAAGACTCGGCCAGTCCCCAAATACCTAAGGGTCTCTCCTC  
GAGGGAAGGTTCTCAAAGTCCCACTTCGAGAAAAAGAAAAAAATTTAGACGAAAAAG  
TATAGGCGATGATAATTCTATAGAAAACCACGAAGCGTCGAATTCAGCGATATGCCTC  
AACAAATGAGTGTTCTGCGCTTGGAATTGCACCTGTAGCAGATGAAAAAGTACACGC  
AGACCCTACAGATTCCATTGGCAGGTCAGCTTTAATGACGCAGCTGACGAAACCTGCC  
GATGAAATGCTGCAGTTGCCCTTGAGAGAAACCTGAGCCAAATGATAATCTCATCGAGC  
CAAAGTCTGAATATCTAGAAGATCAAGAAGAAAGCGTTGAAGATCTGACGCTGGATGA  
CGATATGAACGATCTGAACGAGATGGAACAGGATAACAATAGAGCCGGACCGTCCCAC  
GATCCCTCCCAACATCCTGCAGGTATAGGTGCATGGCACGTTACCGGCGATCGAAGTAA  
CGCGGGAGGAGTCGTGGGCTCGGTGGCAGGAGCTCCAGGAACGACAGACGAAGTCT  
TTCTTGCGAGCCCGAGGAGGCCCGCCAGGCCACCGCGACTCTCAAG

>novel\_circ\_001337

TAACGAGGGGAACGAAGTCCGAAAAAAAAATGGAAGACGACCAGCAATTCTGCCTTAGA  
TGGAATAATCACCAGAGTACATTAATTCAAAACTTCGACACGCTTCTCGAAAGCGGGA  
CGCTTGTGCGACTGCACGCTGGCCGCGGAGGGGAAATACTTGAAAGCGCATAAAGTAGT  
GCTATCTGCTTGCAGCCCCTACTTCGAGGGGATTGCTGAGTGAGCATTACGACAAACACC  
CGGTGTTTCATTCTAAAAGATGTAAAATTCAAAGAATTAAAAGCAATGATGGACTATATG  
TACAGAGGGGAAGTAAATATTTCCCAAGACCAACTGGCAGCACTTCTTAAAGCCGCTG  
AATCATTGCAAATTAAGGGTCTATCAGAAAGTAGAACAAGTGGTAGTAGTAAAACGGA  
CTTTAGGCAACAAAAAGTAGTTCCACAAACAACATCTCAAATGGACATTCCACAATCG  
TCTTCCGGTCTCACGATAGAAAAGAACAAGTTCCTAGGCAGGGTATGGCACAAGGTT  
CCGTAGGGGACCTGCCCGAAGACTCGGCCAGTCCCCAAATACCTAAGGGTCTCTCCTC  
GAGGGAAGGTTCTCAAAGTCCCCTTCGAGAAAAAGAAAAAAATTTAGACGAAAAAG  
TATAGGCGATGATAATTCTATAGAAAACCACGAAGCGTCGAATTCAAGCGATATGCCTC  
AACAAATGAGTGTTCTGCGCTTGGAATTGCACCTGTAGCAGATGAAAAAGTACACGC  
AGACCTACAGATTCCATTGGCAGGTCAGCTTTAATGACGCAGCTGACGAAACCTGCC  
GATGAAATGCTGCAGTTGCCCTTGAGAAACCTGAGCCAAATGATAATCTCATCGAGC  
CAAAGTCTGAATATCTAGAAGATCAAGAAGAAAGCGTTGAAGATCTGACGCTGGATGA  
CGATATGAACGATCTGAACGAGATGGAACAGGATAACAATAGAGCCGGACCGTCCCAC  
GATCCCTCCCAACATCCTG

>novel\_circ\_001338

CGGCGGCATGGCCGGGCAGCACTACTGCCTGCGCTGGAATAACTACCAATCAAACATG  
ACGTCCGTTTTCCATCAACTGCTTCAAACGGAAGCTTTTGTGCGACGTTACTGGCATG  
TAACGAAGCTTCCTTAAAAGCGCACAAAGTGGTATTATCGGCGTGCAGTTCCTACTTTC  
AAAAGCTCCTACTTTCAAATCCCTGCAAACATCCGACAATCATTATGCCACAAGATGTA  
TGCTTCAATGATCTCAAATTTATAATAGAATTCGTCTATAGAGGGGAGATCGATGTTTCG  
CAAGCAGAACTTCAG

>novel\_circ\_001339

ATCACCACAGTAGAACGTCAAGTCTTCGACTTTCTGGGCTTTATGTGGGCCCCGATACT  
GGTCAATTTCTTTAACATTATATTTGTAATCTTAGGATTTTTTGGGGCTTTTCAATATAGA  
CCAAAATATATTATATCTTACTGTATATGGAATACACTATGGTTGGGATGGAATATATTTAT  
GATATGTTTCTATCTTAATGTAGGTGTATTGGATAAAAATAGTGATATTTTAAATCTTGGT  
ACTGGTAGTTTTTCTTGGTGGCATGTCAATGGACCAGGTTGCAAAGCTATTTATGATGTT  
ACTGAACCAGAATTATTTGACCTGCCCCGACCTACAAATGTAACAAATTGTGTACTAGA  
TTATGAAATAGTTGAAATTTTACACGCATCTACTCAATGCATCTTAGGTTTTATTGCAATA  
GTTGGTGGTATTTATCTAAGTAAAGTTTTTTTGGAGGAAGATGATAGCT

>novel\_circ\_001341

ATAATGAAGCACAGGTACAACGGGTTCGAGAAGGAGATGTACGCGAACGCGTCCCGC  
GTCGCAGTGGTGAATCAACTGGCCAGGCAGTTGTTGCACGTCGAGCATCCAACTCGG  
AGCAGATCGTGGCGCGGCAGAACGAGCTGAACCAGAAGTGGGCCGAGCTGAGGGAG  
AAGGCGGAGAACAAAGAGGGACGAGTTGAACTCGGCCACGGGGTGCAGAC

>novel\_circ\_001342

ATAACGTTCATACTGACGGCGATGACGCTGGTCGCCTCGAGCACCGATAACGCGGATCT  
ACCGAGGCCGAGCTACGCCAGGACGATGCTGAAGGTGTCGCGAAGCCTTCCGAGCGA  
GACCGAAGAGTTGAAGGTGCGCACGAGCGAAGGGAACGTGGCCACGCTGATCGTGA  
AACGTAGGGAGAAATCGGCGACGAACGAGACGAGGGCCGGCGTCGCGGAGGATCTC  
GAAAATTCCCGCAATTCGGACGTGATAACAGCGACAAAAACGCGGAGAACGGGACG  
ACGAGATCCGAGGCGAGGAGCAAGGAGGAGGTGAAGAGGCTGGAGGACGCGCAGAT  
AGAGCAACTGAGGGCGAAACTGTCGGACGGAGGGGCGGAGGGAGGGCGGAGGAGCT  
CGTCGAAAGCTGGCAACGAATCGGCGAGGGAGGAGACGGACGAGAACGATCGGCCG  
CCTATCGGCGAGAGGAATATCGATTACGGGAACTGGACGCCCCTGGGTATGGACGGAA  
GGGCCGTGGTCCGTCTCGAGGAATCGAGCAGCACCGAGGAGTATCAGAATTGGAAC  
CACTTCGAGCAAACCTCGAAGACGAGCACCGCCGCAACCACAGCAGCGACCAACGAG  
GAGAGATCGAACTACGCGAGGTTTCGATCCCGTCTTTCCTGCCGGTGGATTGCTGTTGTC  
GCGTCATTTTCAAGACAGGTCTCAGAGGAAGCTGGAGTTGAGCGAGAGGGGAGAGAG  
CGAGGAGGGGGCGCGGTACGCGTTCCTGACGCACCAGATACGCTCGTCGAGGACCAA  
CATCGGGGCGAACGCGTCCAAGAACAGGGATGGAAAGAACGTGCCGGCGGAAGTTAT  
GGTCAGGTTCGAGATAAATGTGAAAACGAACCCGAAGAGGTTCGGCGATGACGTTGGA  
CGGGGATGGTACACCCGTGATCCACGGGAAAAGGGTCCCCGACGAGCCGATCGACAA  
GCTTCAAACATGGCGGAACGCTCGGGTGATCAACAATAAATTGGTCCACGATGGGGAA  
GCTAGCGGAGGGGGATGGGACGATGGGGGATCCTAGTTTCAACTTTTATCCGACGGAGA  
ACGTTTTTGAGAGGCAGAGGTTTCGAGAGGTTTTTCCAGAACGTGAATAGAAGGTACG  
GCAAAGAGTACGAGGAGGAAGGGAAGAACGTGTTCTTCGAGTGGGATCCGAAGAATT  
ACAAGAACGAGGCGTTGAAAGCGGAGGTGTACGAGGCGAGGTCCGACACCTATCGAA  
GCAACGGTTCGGAACGGATGCTCCACCCTGACGGGGTGTCCGTCTACCCGGTGTCCCA  
ACTGTACACGCCCAGAGCCAGAAGATAGCGCCGATCGCGTTGAAGCCGGGCGCGAG  
GGCGCCCGTCTCTCAATACGCCCATCCGGAACCTGGGCGTCCAACCGGCCAAGATCGTG  
AAGAACGAGAAGAAACGGCCCCGACAATTTCCCCGAGAATCAATACTCGTTTCACGGAG  
CAAAGGCAGAAGAAGAAATACGTGTTGAACGACAAGAATATCGTGGACACTTACACG  
ACCAAGAACTATTATCCGAATCAACATTTCTACGGGTTGAAGAGGCCGAGCGACGCGC  
CGTTCCTGGGTGAAAATCTCCGAGAACTTGAAGAATCAATTCTCGAACGGCGTGAGAA  
GATGTCGAATTCACGAAACCGGTGATCGATCCACTGGTGGAGGCGACCCATAAAATT  
TCCCAAATTTGGGCCTCTCGAATCGGGGCAAGGAGGCGCAGGACAAGGTCGGCACG  
GTCGCATCAGGCACCACGAGCATCCTTATACCGGCGCTTGGCCTCGTCGCATCGGGCG  
CTGCACTCGGGATCGGGGCGGTGCGCGTCGGCAGATACCTGGACGTGGACGTGTTGAA  
AAGATCGGGCGACGCGTTGGCCGGGACCGAGGTTCGAGTATCGAAGAGCTTTGGACGA  
GGCGATGGGGGGCGGGGAGCGAGGGAACGATGATAAGAGCTCGAGCGGAGCGACGT  
ACGACGGGGGCGTATACTTGTTTCGAGGAGGGGGGAAGGAAGGGCGAGGGGGAGAAG  
GTTGGAACGAGATCGAAACGGAGTTTTTGTGATCGTCGAGGAAGAGGATGGGGGG  
AAGGGGAGGGAGAACGGGGACGAAACGATGGATTGAAACGGAGTTTAAGAAGGAG  
ACGGAGCCTCAATTACTTGGACGTGTTCCAGGCCGAGGGAAATTTGAAAAATTTGATC  
AGGAACAAACGTCTTCAACGAAAGGGAGCCGATTTCGATCAGCGAGATCGTGGAGATA  
GATCTTCCAGCGCGCGAGGGAAGCGTGGACGTGACGGAATTTCTCGTCCCGAGGAGA  
AAGATCGAGTCCCTCCCCAACGGGGGGAAGGAGGAGGATTCGCCCATTTTGATAATCG  
ACAATGGATCCACGTTGGCTAAATTTCTGTCCAGCAACGATTCGAAAGATTTCGACTCG

AAGAACTCTGTGGAGGCGAGAAATTCGGTGGACGAGAGGGACGAGAGACGGAAGAG  
GAGAAGGAGGAGGAGGAGCGTAGAAAGCGATCAGGAATTGGAGGATGCGCTTCAGAA  
TTTGGAGAACGCCGAGATAGCGGAGGTGGCCACATAGATGGAGACTGGACGAATAC  
GCCTTGTGCAAAGAGGATATTTTTCGATACCATGATCCAGAGAGGGCCTGACGCTGTTA  
TTACGATGGAGAAGAAAATGGCCGCCCTTTTGGGCCT

>novel\_circ\_001343

GCGTTTCCACTGGCGGAGCTATGAGGGGCGGCAAATTCTTCATCTTCAACAAGAAACT  
GCTCTGAGCGTGTCTCTTCTTCGTCGTTCCCGTCTGCTTAAGATCCGAGGAAGAGGA  
AGAAGAAGGAACAGAAGAAAAAGAAGAAGAAGAAAAATAAACCTCCTCCCTCT  
CCCTCCCAAGAAAAAGAAACGTATCAAAAAGGATAGTGGCGTTCCCTCTTTCCTAAA  
TTCGTTTAATTCTTCGTCCGATTGAGAAGGAAACGAAGGTCTGAACTAAGATCTTCGAT  
AATCCTCCGTTGAGTAAGAAGATCAAGGCAGGAAGAGGAGAATCCGCCGAGATCGT  
GACCGCGGTTTTTCTTTCTTTCTCCGCATAAGAAAAATCGAGGCGAATTTATATTTCTC  
GCTCGACGATTTTCCATTCTTTCTTTCTTTCCCGAAATAATCGTATTTACGGAGGAGAGT  
TCGAATATACATATATCACCTTTCTCTCTCTCTCTCTCTGATCAATCGAATCGAATC  
GAATCGAATGATCGATCCTCCTCGGTTGGTCGCGATCGAGGAGGCGTCGGGGCAGGGG  
AGGGAAGGGTGTTGGTCGAGGAGGACGTAACGCGCGGCGCGTGGCGATCGATCGATC  
GATCGATCGGGCGAAGGTGGAGGGGGAGGACGAAGGGAGAGGCGACAGGAGGAGGC  
GGAGGCGGAAGAGAAGGAGGAGGAGGAGGAGGAGGAGGAGGAAGGGCGATTTCGGG  
GAAGGTTTGACGATCTCGCCCCGTTCTCGGCCCGCGTGTGCTGCTGGCCGTGGCGA  
GTGGAGGATGGGGGGGACGAGGAGGTGGTGGCGGCGGTGGTCGCCGGTGATGTTGTT  
GCCGCTGCTGTTGTGCGCCGCCGTGTGCTGGCCGCTTGCCAATTCGACGCGACTTGG  
AACACGGCCGCTCTCGACGACGATTACGACGAGATCAGGAGAGGATACGTGGCCGATT  
ACCGTGGGATCGAGGAGTCGGTGCTCGGCAGTGGCAACCGCCGGGAAGAAAGGGGC  
GCTCGGGATCTCGATCCACGGGATCCGTTCTACGAGAGAATCGGCGCCTACAGGCGCA  
ACAGGGCGATAGATTCCAGGTCGACGGAAGCGAACACGAGATTGGCGGAGGAAGGTG  
GCCAACAATCGAGGCTGGCGAAATCGAGCGCGAAGTCGAGCGACTTGGGCCGCGACA  
AGGGGCGGAGATACAAAAATGTGACGATCGGCGACGGGATATGCCAGAGCATCGACAT  
ACGGAACACCGCGTCCGCGTTCGGAATTATGAAGGACTGCAGGGTGATAGAGGGCTTC  
CTGCAGATCGTCTCATCGAGAACAACCTCGGAGAGGGATTTCCAACCGATCAGTTTCC  
CGCTGCTCAGAGAGATCACCGGATACCTTCTACTGTACCGCGTCAACGGATTGAAAAC  
ATTGAGCAATCTGTTCCCAATCTCGAGGTGATCAGGGGAAATATTTTGCTCACCGATT  
ACGCGTTCATGGTGTACGAGATGCAGAATCTTCAAGAG

>novel\_circ\_001347

CAAAAAAATAGAAAATATTGGTAGAATGACGGCCATGACGCAGGAAGAAATTATGGCT  
GGTGCCAGAATTGTGGCCAGGGTCTGGAAGCTCTCCGTGTAGAACATGGAGGACTTC  
TTCAAGCTTTGCAGACCCAGGATGCGCCAGTCGCAAGAGACAAAGCTAGTTTATTATC  
AAAGAATATCGAGATGATAGAATTAGGCCTTGGAGAGGCACAAGTTATGATGGCTCTTG  
CAAATCATTTACAAATGGTAGAGGCTGAGAAACAAAAGCTTAGAACACAAGTAAGAA  
GGTTGTGCCAAGAAAATGCCTGGTTAAGAGATGAGTTGGCTGGTACGCAGCAAAAATT  
ACAAGCCAGTGAACAAGCACTAGTCCAGTTGGAAGAACAAAAGAAACATTTAGATTTT  
ATGGAAGCATGAAACAGTACGATCCTGATCCTTCGCGGATGATGAGAATGCTAAAG

ACAGGCCGCCAGATGATCCTGTGGTTGATCTATTCCCCGATGATGATGCGGACGACCGA  
AATAGTAAGTCAATATCACCGACACCGCCTTCACAATTTGCACAACAAGTGAACGCTG  
GATACGAGATACCTGCACGTTTTCGTACGCTGCACAATTTGGTTATACAGTACGCTAGC  
CAAGGCCGTTATGAAGTAGCTGTCCCCTTATGCAAGCAAGCATTGGAGGATTGGAAA  
AGACTTCTGGCCACGATCATCCCGATGTTGCCACAATGTTGAACATCCTCGCTTTAGTG  
TATAGAGATCAAAATAAATACAAAGAAGCGGCGAATTTGTTGAACGATGCCTTGGCTAT  
TCGTGAAAAGACGCTCGGTGAAAATCACCCCGCAGTCGCTGCCACGTTGAATAATTTG  
GCTGTTTTATATGGAAAACGGGGCAAATATAAAGAGGCTGAGCCGTTGTGCAAACGTG  
CCCTCGATATTCGAGAGAAGGTCCTCGGTGTCGATCATCCCGATGTCGCTAAGCAATTG  
AACAAATCTTGCGTTGCTGTGTGTCAGAATCAGGGTAAATACGAAGAGGTAGAACGCTATT  
ACCTGCGAGCGCTAGAAATTTATGAAGGTAAACTGGGACCGGATGATCCTAATGTTGC  
AAAGACGAAAAATAATCTGGCATCGTGTTACTTGAAGCAAGGAAAATACAAGGATGCT  
GAAGTTTTGTATAACAAGTATTGACTAGAGCACACGAAAAAGAATTTGGTGCTATTGC  
CGGCGATAACAAACCAATTTGGCAGGTTGCGGAAGAAAGAGAAGAAAACAAGCATAG  
AAATAAAGAGAATACTCCATATGGGGAATACGGAGGCTGGCACAAAGCTGCTAAAGTG  
GATTCTCCTACGGTTACAACCTAAAAAATCCTTGGTGCAATTGTATCGAAGACAAGG  
AAAATACGAGGCTGCAGAAACATTAGAAGATTGTGCTCTTAGGTCACGAAAGGAGCA  
GACATTGGAGTTCGTGAAGCAAGGAAAAGTTGCGCAGCTTTTAGGAGAAGAGAAAGG  
ATCGACGAGACGCGGCTCGCGATCCAGTTTAGCTAATAGCGAACACGAGCAACATGAC  
GAG

>novel\_circ\_001348

GAGCGATGTCTTCCTGGAACCGTATCTGCAGCAGCACGGAACCGTTCAGGTCGTCAGC  
TCGCCGAGCACGCCTCCGCCGAACCCGCTGCAGCATCATCAGCTCACGCAGCTGCATC  
ATGTACAGAGCGAGGAGTCGCTTTCCTCGGAAGGGTCGGCCACCTCGGGTGGATCTTC  
GAGCTCGACGGAAGATTCTGGCAGCGAGGTCGCGTGCGACATCACCCGTGATCGAGAG  
GCTTATACGCTCCCATCCGATCTGGTTCCTTCCTGGCATCCAAAGAGCAGGCGCTTCC  
ACTTGTTGCAAGGCAAAGAGGAAGGG

>novel\_circ\_001349

ATAGAGATGGCAACAAAGTTACAACCGTGGTGGCTACACCTGGTGCTGGTCCGGATCG  
TCCCAAGAGATCTCCTACACAGACACTAAAGTAATCGGTAACGGCAGCTTCGGCGTT  
GTATATCTAGCGAAATTATGCGACACGGAAGAGCTGGTCGCCATCAAGAAAGTTCTTCA  
AGACAAACGATTTAAGAACAGAGAATTGCAAATCATGCGGCGCCTCGAGCATTGTAAC  
ATCGTGAAACTGAAATATTTCTTCTACTCCAGCGGTGATAAGAACATCTTAAACGCAAC  
TAATCCAGTTTTTCATGTGGACAAGGACGAGGTTTATTTGAACCTAGTGCTGGAATACA  
TACCTGAAACTGTGTATAAAGTTGCTCGGCATTATAACAAGAGCAAGCAGACCATAACCG  
ATTAATTTTCAATTAAGCTGTATATGTATCAATTATTCGGTTCTCTGGCGTACATCCACTCGC  
TGGAATCTGCCACAGGGATATCAAACCGCAAAATCTTCTGCTCGACCCGGAATCTGG  
CGTTCTCAAGCTCTGTGATTTTGGTTCCGCCAAACATCTGGTGAAAGGGGAGCCCAAT  
GTGTCTTACATCTGTAGTCGTTACTATCGCGCGCCCGAATTGATCTTTGGTGCTATTGATT  
ATACTACAAAAATCGATGTTTGGAGCGCAGGTTGTGTAGTGGCAGAGTTATTGCTCGGC  
CAACCGATATTCAGGGGACAGCGGAGTGGATCAATTGGTGGAGATCATCAAGGTGC  
TCGGCACCCCGACACGTGACCAGATACGTGAGATGAACCCCAATTACACCGAGTTCAA



ATTCCCACAAATTAAGGCGCATCCATGGCAAAAG

>novel\_circ\_001350

TGTTACAGATACTCAGCATAATGTATTGGAACCTGCACAAAAGACTTTGGAATTGGCAA  
AAACACCAAATTGCACAATGGTGGATGACTTATTATGTCCTCCAGGTCGTCAGAGTAGA  
CCACCAAAAATAGCTATAATTTTAAGAGGTCCGCCAGGTAGTGGAATAATCTTTTGTGGC  
CAAACCTTATTAAGGACAAGGAAGTTGAACAAGGAGGTTCTGCACCAAGAATATTAAGT  
CTTGATGATTATTTTTTGGTAGAGAAAGAAATAGAGTCCACAGATGATAATGGGAAAAA  
AGTTACAATTAAGGATATGATATATGAATACGAAGAAGTAATGGAACAAAGTTACATTA  
CATCTCTTGTTAAAGCTTTTAAAAAAAATGTTACCGATGGTTTCTTCAATTTTATTATATT  
GGATTGTATAAATGAAAAAATATCCGACTATGAAGAGATGTGGAGTTTGTCTAAACAA  
AAGGTTTCAAGGTATACGTATGCGAGATGGAAATGGATTTACAAATTTGTTTAAAAAGA  
AATATTCATAATCGCACAGAAGATGAAATAAATAGAATTATAGATTATTTGAACCAACT  
CCAAGTTATCATCAAAAATTAGATGTTAATTCAATGTTGCAGGAACAAGCAATTGAAGA  
AGTTCATATGGAAGATAGTGAAGAAACGCAGGAGAAATCATCTCAGCAAAATGAAGAT  
AGTCAAGATAGTCAAGATGATATGCAAGATGCTATTGGAGTTAGCAAATGGGAACGTAT  
GGAAGCTGAAGATAAATTAGATCGATTGGATGGACTTGCAAAAAAGAAAAATGAAGG  
AAAGGTACAACTATGAAAGATTTTCTTCAAGTTCCTGACTATTACAATATGGAAGATA  
CTTCCGGTAAAAAACGAGTGAGATGGGCAGATTTAGAAGAACGTAAAGAACAAGAAA  
AATGCGCGCTGTAGGATTTGTAGTCGGTCACACTAATTGGGATCGTATGATGGATCCT  
ACAAAAGGAGGAAGCGCCTTAACACGCACAAA

>novel\_circ\_001352

GTCAAGATCCCGTAGCCCGCGCAGAAGATCTTTAACCCGTAGTCGCAGCCGAGATCGT  
CGTTCTCGTTCGGATTCCCGTGACAGACGTTAGATGCTAAAAGTATTCCAGACAATGGA  
TCTACTAAATATGGCAGAAAGAAGATAAAAGAAAAAATGATTTTATATGTATATAAAAAA  
GATCGTTATTACACGTACATACAGTTTAACAATTATTATTATAAATAAAAAAAATAATATT  
TGTAAGAAATGCGAAAGAAATATATACACAATGTTTACTATTTCAATTGTTGAGTTTGTA  
TACATATATAACATGAAAATTAATCATATATACATAAATGCTTTTGAGTAACTATATATA  
TATAATATTTTACAAATATATGACATATTTTTTGTATACAGGTACATTTACAGACATAA  
AATTTTTTATAATTGAGTAATTAAATATCGAGTAATGAATTAGATATCTATTTCTTAGATGT  
CTATAAGATTTATTCATTGCTTTAAAGTGAATAACACTTATATTATTACAAGTAATACATA  
AAAATTCGGTTATGAATTTCAATTGAGAGAGTTATAGCGATAAACATAACATTAATTGTT  
CAAATCATTTTTGTCAATTTGTCAATTCAGAATAGAAATGATTTTGATGTGAAGAAATA  
AGAAATCTTCATTTTATGTTGTATTAATAATTTGTACTCTTATAAATTTAAGATTTTCAAA  
TAAAAAAGTATATGTTATAATTTTTATTAGTTTTCTTATTGTGAATAATAATTTGATAATTA  
CTAATAAATTAACGAAATAATATTGCATTGAAATTATATTTTTTATCCTATTTTAATATTAA  
TTTTAAAAAATTTAATATATACATGGTTAAAATTAATGGTGCAATGAAATCATAGAGCC  
CAAAATAAACAAAAAAAAAAAAACAATAATAATAAAATTATATTATATATTAGATAGTTAAC  
TTCTTTTTTAAAATGCATTTAAAGTTCTTTTACACATATGATTTATTTTGAACCTGGATATTA  
CTGTTAGTAAGAGAGTATTTTATATTGTAAATTATAATAATATAATATTATTAAAGAATAA  
TAAACAAAATAAAATTTTATTTAAGATTTTGTTTTTATAAAAATCGAATTTAAAAATTT  
GTAAATTAAGTCTAATTAAGTTATAATTTTTTAAAAAAAATTACAAACATTTAGAATTTT  
CAGCATTTTTCTGTGATAACATTTTACTAAAATTTAATAGTTTAATACAGAGTATTCATAAA

AAATGTAGAACAGAAGGGTGATTTTCGTTATTTAAAATGATGAAAAAATTTTCATATATCC  
GATAATTGAAGAGTTGTAAATATTTTTAAATTTATATTAGATGAGATGGTGGAAAAGCGA  
GAATGTTTCAGCTGAGTATATGACTAATATTTGCAATATCGCTTATGTAGCTTTTTAATGAA  
AATAAATACATTGATATTCTTTTATACACAAATGATTATTTTTGAATTTTCAGTGTAATATAC  
AATGTAAATACTATGTAATGTAATTATGCAATATTCTTATATCGTTAAAAAAATTTAGTACT  
TTTAATTGTGCAAATTGAAATTTAATTATTATTTTTTATTATTTTATATTTAATTTATTATTTA  
ATAGAAATGGACGAATTTTCAGAATATTCTACATTGCATGGTAATTACAAAATATTTAATTT  
AAAATCATAGATAAATTATTGTATTATATTACATTCAATTTACTTTACTTATGAAATTCATA  
GAAGCAAATCAAAAAATATATTATAAGATTTTGATTTAAAAAGCTTGAATGTGTTTTCGT  
ATGCATAATTGCTTTTTTAAATTATTTTACATGTACAAGAAAATTTGAAATATTAATGATA  
CTTGAATCAATTTGAATTTTCAGATTATTAATATGAATTAATCACTTCACAAATTTTTATT  
TTTCTTTCATTTATACTCAATATTTCTTATTATGCAGAGATAAAAAATAAGTCGATCTGA  
ATATTATATATTAATAATACGAATTAATATTATAATTACACATTAATATCAAATATCTATAAA  
AATATACATATATTATAAATTATTTTTCTTATATATACTTCGAATGAATATTACAAATTTACTA  
ATTTGTTTTATTTCTTATATTTTTATTTTTGATATGTCAACAAAAGAATTGCGACCAGGAC  
AAAGCAATATTATCTTAGCAATAGAAAAAATTGTTGACTTAGACTTTTCGTATTTTTTTATT  
TGGTACACACAAATAAAAGATTTCGATTTCCGATATTATTATCTCATTTTTTCTTTCTTTAT  
TTAGTCTCTTTTTCTAACATCCACGATTAGTATTTAATTGTTAGTAATTGTATTTAATAACC  
ATATTACCATAGAAAATATATATATTATATATATTAAATATTTTGTATTTTTGTATATTTAAT  
TTATTAAATTTATAAAATTTTGAATAATTATATTTTTTATAATTTGCAATATAATAATGATAA  
TGATATGTTTTTAGAATTAAGAAAAATAGAATATAAGAATTGAAATATAATATTAATAGGA  
ATAAAAATTATTTATATGAAAAGGTGTAAACAAATAATATTCGATTATGTGCAAGAGCTT  
TGATTATTGAGCTTTTTAATTATAAATCGATAATGACTTTATATGTAAGTTTTATTGTTTGG  
ATCTTATATATATATATTGTGAATTAATTTATTATTAATTGTGTATAATTAATAAAAATTAGT  
TTAATTTTTTGTGTATGTCAGAATAGAAATTCTAAATAATCAAGTCATCCCATTTGAAAAT  
GCGAAGTGAACGTAATAATAAAGTATTCCAGTATATAATTTTAGTAATATATAAATAATAT  
CCAAAAATGTTATCTAATGTTTGTAGAAAGTCCTAAAATAAAATATAATGTAATATAATGT  
AATGTTATATATTGTGAAAAAATATCGTTGAAATGAAAAACAAATAGATGAAGATAT  
GGTAAAACATTCATCCTTTGAATTTGACAGCTAATTTCAATAATTGAAAAAAAATTTTT  
TTTCTATGTATTGATTTTATGTATTGATTTTATTGTTATTTGTAAATAGAGATTCAATGTA  
AATATATACTTTGACCGCCGGATATGACAATTAGATAATTTGTGAATACATCGTGCTCCAA  
TCGTCAGACACGATTATCATTACTTGTAAGAATTTTGAACCTTTATTATAATCTGATCGC  
CAGATATGACATCATAGATAGTTTGTCTAACATCACATCGTACTCTGATCATTGGACAT  
AATTACCAACTTTAAAATAGTGAAATACCCAACCTCTTTTATAGACACGCGTCTGCACG  
TGTAATACAATAATACAGTCTACTTATCTTTAAGAAATATAGCACTTATTACGATATCTCT  
CAGAGAAAATTTATAAATACCCAGCTATTAGCTTCCATTCATCAAAATTATTACAATACTT  
CTGTTGAAGGCGCAAACAGATTTGTTTCTATAAACTACGAAAAATAAGAATTCATTTATA  
TTTAAATAAAATATTATATAATGTTGAATTATTATGAAATTTGTTGTAATTATTCAAAGTAT  
GTTTTTATATAATATATATAATTTTTGTTTAAAGTTTTTGTGTTTATAATCGTAAAACCTGGAT  
AAATAATCGAATATTGATAGATGCACGCTACTTTGGACAAAATTAGATAAGAAAAAAA  
ATGAAGTATTTTTCTATTTTGATAATAAACAATAAACTATATTGGATGGATATTAATATATA  
ACTATACAAAACCGTTATAATGATTTACAATATCTAATCGTGTTCAATGGCTAAAGTATGA  
TGAAATTTTAATAAACTCCAAATTCATACTAAAATGCAAAAAGTTAATATCTATGGAAAA  
CCTTATTATATATAGATAATTATCTGTAATATATTATATTATCTATAATATATTTTAGAAGAG

ATACATCGTAGCCAATAATAATATGAATTAATATTGAATCTGAAAGCTGACTTCAAATGA  
TCCCTAGATGATCAAGAAAGAATTCCTTGGAATATATGTTACATAAAAGTACATAATGCT  
TAGAGTTTGATTACATATTTGCTATAAATCTTGAAGAATAGGTTGATGTTTGTGGCCAC  
AGAAGCTGATTGAAGTATTATATATTATTCTCAGAATTACATTGCACTCTAATCAGACTA  
AAATATTTTTAAATATTTAATTCTAACATTTTATGACATTAAATATTATTCTCACAAATGTT  
TTTCTAACATCTTGAATTCCTCATTTTAGATTTGCGTAATATTTCGATAATGATAAGAAAA  
ATTTTCATGAAATATCTTTCCGAAATAAAGAAATTATAAATCTTGCGGATTCATTATTCGC  
GAACACTTTCAATTTTGATTTTAAACATTTAATATTTCTAAAAAAATTTTAATATTTTATTT  
AATAAAAAATTTTTAATTTCAAATTCAAAATTATAAATGTGAAATGAAATGTTTACAAG  
CAATGATCGCGAGATTTATTTATAGTATATTTATATATTATATATTATAGTCTATATTTATATAT  
ATTATAATATATATATTATATTATTATATTATATTATATTATATTATATTATATATATATATAT  
ATATAATCTATTTGAAGCACTTTTATCTGATTGAAATATAATCTGAATAATGTTCCGTTGA  
ATAATTATTCAACAACCTTAGCCGACAACAATATACGCTTGAAATTTATAGTACGAGCTTC  
GAAAACGTGTTTTTAGGTTTGGAGGAAGCTGATCTGTGCGTTTATTAATTATGATATATTTT  
ACGGATTTCCCAAATTCAGCAGAATTGGGAAAGCACTAATATTTTGCATTTTGGAAATGG  
ATTATGAATTTGAAGTTTATTAAGATTTTCATCATATTCTAATCTCTACAATTATACAATTA  
TATTATCATCATTATGAGATACTACCTTGTACAATCATGCATATCAATATGATATATCAATA  
CAGTCTATTGGAAAATATTCTTATTTTTTTCATCTATCAATCAGAGATTTCTTTCCACATATT  
GATATCCTATTATTTGTACCTATTTATGATTATTATCTATTTATGATTACACAAAGACTTAAA  
TAAAAATATTTAATGCTAATGTACAACAATAGAAGAAAAATTTTTAAAAATTCAAATCAA  
TTCTATTAGATTATAGTTAATCTGTGTTGATGATCCTATAGCGAAGTAAATGATAGATATT  
GAATTTGATTGAAAATATATATTCATATATTATTTTCAATGACGTTTTATCCATAATCAGA  
TAATTAATATTATGTACAAATTTATCAAAAATTATTTCAATTTTCATTATGCTAAGGAAAAA  
TATCAAAATATCATCAATTTTAAGAAAGAATATTCAGAAGATGATTCACTGGCATATTTTC  
AAAGAATTGAATTTTAAATAAATGGTAAATAATTAATCCTTATCTACTTATTTGGCGAATTA  
TTTTTTAATTTAATATAGATAGTAATTTATTATTTATTTTTTTATTTTTAAATATATATTTATTT  
GTTAAAAAATTTTTATATTCGTCTTTTTTATATCATAATTCAAGATTATTCATTTTAAATAAAT  
TCGATTATTTATCCCATACGAATAACAATTAATTAATATGTTATGAATAAGATGTAATTTA  
ATATAATATAATTTAATATAATTTAATATAATTTTTTTTTTAAAAATATACTTTTTTTCAGTGTT  
ATTTGTATTTGTTTATATACAGAATATATTCAATGGAGTTTTTTTATGAGAAAATTTAATCAT  
TTGCTTTACACATTTAGAAACAATTTGGCACAAATTAGTTGGAATGTCAATATAATCTTG  
TTGTCACCTGAGACGACATTTATAGTCATACCAGTTTCAACGGCAATTACCGTCATTTTA  
CTTGAGGGAAAATACTAACATGTATGGAACAGCGTTTTTTTGAAAAAATAATGGACTTGT  
CAGTGGTTCGGACTCATTCTAGGAAGCTATCTTTGGTCCGAGGTGCCGTTTAGGGGATT  
GGTCCTTATTGGATACTTGTACACTGAAGATTCGCAAACTCACGAACAACATAGCAAA  
GAATACCAGTTTGAAGAGAACTCTTGAAATCTTGCGAGAACTTCAAGAAGAACATTAC  
AATATAAGAATTCAGAACTACAAGAAAATCAAAATTATAAAAACATCAGAACTCTTTA  
AACTTTCGAACTTTAATGAAAGTGAAATATCATTGGCATATAGACTTTGTCTTCTTCTTG  
TTAATGAATTGAATTTATCAACAGCGGACTTTGTATAATTAATAATTAATTTTATTACTAT  
ATTTCATAGCTCTAGGAACGAATTGGAGCTAACATTTTGTAGTCAGATAAAAATAAATAT  
ATGAATTTATAACTTGTGAAGTGTAATTTGTGCCATTCAAATCTCGTCGTGCTTGTAG  
TGCAACACAAGAATTTTAAGAACAACCTTGAAACTACTAATCACAATCAAGTATATCAT  
CAAACACCTGCCAGATTTTATCTGCAAGGAAGCTTGTCTTCTGCCAACTCCAGATCA  
ACGAATTCTGGAATGTCTTCACGCAACATACAAGGGATATACCCAGCTGGATGATATC

GTCTTGATCATTTTAATCCATTTTTATATAAGTCTCCTCTACTAAGATAATATAGAAGTTG  
CATTGAAATCTTTCATTAGAGAACATTCAAAGGATCATAGAAGAACAGATAGAAGATAC  
AGAATTTGAAGCAGCTCATGCCGCAGTATGAAATAAATTTGAAAACCTCGTATTGCGAGA  
TCGATACTATCAAGTACCAAACACTTAATTCTGTACTTACTTTATCTATAATCTCAAACAA  
TAGTTTTGACATATATTCTTTTATTTTATTCTTTTATATTCTTTATTCTATTATATTCTATAAT  
TTATTCTAGAATAAAATTACCAACAATAGAATTATTGACTTTTCGGAAATTGTAATCTTTG  
GATAAAGTTATAGAGACATGTTCTGAATCATTGATACACAATAACGACGTATTAATAAATA  
TTGAAAAATTTCACTATTTGAAGTCATCTTTCAAGAGCGCTGCAGCGAGAGTTAAACA  
GTCTCTCGGTATCTCTGGAG

>novel\_circ\_001354

AAAAAAATTTGATGATGGTTAAAAGAATTGCTTAACGAAAATCCGATAGACGCAAAA  
AGAATTAGCAAAAAGATTGGGAGTCACCAGACAAGCAGTATCCATCCGACTGAAATAA  
TTGGTAAGATAAAAAGGGTGATGATCCATATGAA

>novel\_circ\_001356

GAATACAAAGAGTTTCAGAGACGCGGAAAATATAATGCCACTGGCGACTAGCGACTTTC  
GTAACCCTATCTGCCAGGAAATGAAGTCGATGCGATCCGGAGTCATGTCAACAGAACC  
ATCTATGCATCAGCAGATTTTCGCAACAGAGATGAAGATATCCACGCTGCAACCAATGG  
ATAACTCAAGTTATGGAAAAATATACAATGAGCAAGGGAGCATAGACAGCTCCGATAC  
GTATGCTAGCTGTCAAACCTACCCATCCCATTCGCAGGTTTCTTCTGCTGGTCATTCCG  
CGGATAATAATAAGGGTGATTTGACTGAAGAAGCAGACAGTAATCTCTATGTGAATCCC  
CTGGAAGCTGCAGAAAAATGTGGAAATAGAGTGAAGAAATCTGCTTCCGGTGAAATTG  
GACGTAATGTCGACATGTCACCGAGTGTTGAATCGTTAAAGGATCTTCGTCCCTTTAAT  
GAGGGTAGCAAGATTACCTTAAATGATATAGTGCCCAAGCACAGAAAAATTCGAATTCA  
GGAG

>novel\_circ\_001357

GAATACAAAGAGTTTCAGAGACGCGGAAAATATAATGCCACTGGCGACTAGCGACTTTC  
GTAACCCTATCTGCCAGGAAATGAAGTCGATGCGATCCGGAGTCATGTCAACAGAACC  
ATCTATGCATCAGCAGATTTTCGCAACAGAGATGAAGATATCCACGCTGCAACCAATGG  
ATAACTCAAGTTATGGAAAAATATACAATGAGCAAGGGAGCATAGACAGCTCCGATAC  
GTATGCTAGCTGTCAAACCTACCCATCCCATTCGCAGGTTTCTTCTGCTGGTCATTCCG  
CGGATAATAATAAGGGTGATTTGACTGAAGAAGCAGACAGTAATCTCTATGTGAATCCC  
CTGGAAGCTGCAGAAAAATGTGGAAATAGAGTGAAGAAATCTGCTTCCGGTGAAATTG  
GACGTAATGTCGACATGTCACCGAGTGTTGAATCGTTAAAGGATCTTCGTCCCTTTAAT  
GAGGGTAGCAAGATTACCTTAAATGATATAGTGCCCAAGCACAGAAAAATTCGAATTCA  
GGAGTTTCACAAATCATCAAGATCGCAAACGGAGCACAGTTGAAAAATTGCTGAGGG  
CGATCATACTACTGAATGCCCTGATATTTATAGCGTAAGACCTCGTGCGCAATTTATCA  
CCGATCAGGATAGCATCGTGACTCGTAATATCACAAAAAAGGAGACCACAGAGAACAA  
TTATTATGGAGGATTACGAGGTGGCAAGCCATTTACGAGCAATAACAGTCTAGCCTCGG  
CAACAAGAATAATAAATCATCATTTATTTGGCTCTAACATTGGACCTAGACATTACACGG

>novel\_circ\_001358ATACAAACTGGAAGTGGCCGGCAAGTCTCTACCCGTGTTGACAAA

CCTGGACAAAGGTCGATACGGTGTCTTAATCTTTGAGAATCTGAACAAGTACCTGCAG  
ATGGACAAGTGGAATCGCGAATTGCTAGATAAATATTGCAGAGAGTATTCGGTCGGCAT  
CGTGGGATTCGCGCCGTCCGGCGAGGAAAGTCTCGTCGGTGCGCAGCTGAAGGGTTT  
TCCTTTGTTTCGTGCATACTAATCTCAGGCTGAAGGATGCACAACTGAACGCGGCGTCTC  
CTATCCTCCGATTAACCAGATCCGGAGAAACGGCCTGGGGACCACTTCCTGGCGGTGA  
CTGGACCATTTTTTCAGGCCAATCACAGCACCTACGAGCCTCTGGCATGGGCACATCGG  
GACAGCCTCGACTATCCGGCCAATAAAAGTCCTCTGGCGACTGTCATTAG

>novel\_circ\_001359

ACTCGTGAAACAAGGGGAACCAACGGCGCTGCACGAGATCGATAAAGGCGATAGGGT  
AACGTTGAAAATCGTTCCGGCCGGGAAGCATCGTAGCTTTCCATCGTCCCTAATTGAC  
AGGTAGAAAGAGGAGGAGGAGGAGGAGCAGCCTCTCTCGCGGAGGAGAGAGAAGAA  
AAGAAAAGGCGACGCGCACGACACACGTTAACATCGTGGAGAAAAGCTAGACGAGG  
ACGAAAGAAAGAAGAAGAAGAAGAGGAGGAGGAGGAGGAGGAGGAGGAAGGGACACG  
AAATTTACGAGTGAACCGGGTTTACTTGGTTGTCTAGGAGGCAAACACACCGGGTATAT  
CTTGAGCCAGTCGTGTGCCGTAACAAATGACGGCGCCGTAATAATCAGCTAACCGTGGA  
GCCGGAAGTGAGGCCCGGATTTTCGCGAAAGTTTCAACGGCGCCGATAAAAAAAAAA  
TTTGAGTTGACTTTGGACTTTGGAGTTTGCAAAAAAATTCGCAACATCCACGTTGAA  
CTGAAAATTCTTCGTCCTTGAAAATTCTTTCTTTCTTTTCACGATACAGTCGCGATATGG  
TCTCGAGCAAACAGTACCGGAAAAGATATTTCGTCCACATTTATCGATTAAAGGAGAGA  
ATGTCGAGGATCCGTCGTGGCACCAGTCGCTGAGAAAAGAAGGAGGTGAGATCCATC  
GAGGGGGGAAGAGACGTTGGGCCAAATGGGTAAAAAATTCGGATCGCGATGGACGGC  
GCGACCCCGTGCTGCTCGCAAAATGGTGATCGTGCTGCCGTCTGGAAACGCAACAA  
GTGGCGATCTTAATTCCAAGTTGTCATCGATGTTTTCGAAAGGATTGACGATCCACGA  
CCCCCGTTTTTCGATCTGAGCCTCTTCGAGTTGACCTGAGCCAACAACCCCTAACTAG  
AGAGACATAAGAAGAGAAATACCGAATTCAAGGATTTTTATTCTTTAGTCATTTCGTAGC  
AAAAATTCGGTTGTTTTTATCGAGACGCTGGGATTAATTCTCTTTCTCTCTCTCTTT  
CTCCCTGCGATAGAAAAATCCCAAGTATCAAAGGAAATTTTCCAATTAATTCCTGTGTG  
CTTTCGAGAAAGAATACTCGATTCTGAGATTTCGAGCGGAGAGGGGAGATCGAGTCCT  
CCTTAGTTAGATTGGCTCGCTGTTAATCTTCGACGAGAAGGTTTTTCGATCGAGGTTGA  
AGAGGAATCTCGAAGGCAGATTCGATATCCTCTCGATATTGTTCAAGGGAAAGAGAGT  
GGACGAGTATGAGCAGCGTCGATGCCCCGGCGAAGCAAGAGAGGGTATCCTTGTTCCG  
GAAGTGAGGGACGATTGTGCGCTCCGGGCGCTCCGACTCTATACGAGGTGATTCGAGG  
TACGTTTTCGCTCTCGACGGCGGGGCAGGGAGGAACAAACCGGAGGATAATCTGAGA  
GACAACAGGACGGTGCCTCGTCGAATGAGACGATGGTGATGAAGATTTCCGCGGTGCG  
AGGCTGGCGTTCTTTACTAAGCGCCGTCGGTCCGCGCTGCGTCGTCAAGCAGGCCAC  
GGTGAAACGATGCGTCGCGGCGCTGCTTCTCGTCTCCGTCGCCAGTATATTTATTACA  
CGCATTATATCATCAGCAGCCCGCTGTCCAG

>novel\_circ\_001360

GAATTTGCTCCGGTTTGCGAGAAGTCCGCATCCAGATACCGACGGCCGTGAAGAAAGG  
TGAATCTGCGATACTGAACTGCTGGTATGACACCGAGGGTGATCTTTTATACGCCGTCA  
AGTGGTACAAAGGGGGTCGAGAGTTTTATCGCTATGCCCCGAACGAGATCCCGATCTT  
CAAGACTTTCCCCATCGGGAACCTTGACGGTGAAGAAAAGCGAAAGCAACGCGACCCA

AGTCGCCCTGACCAACCTGGAGTTGGACGCTGCGGGGGTGTACAGTTGCGAAGTCTC  
CGCTGATGCTCCCTCCTTCCAGACGGCCTGTGTCCAAGACACCATGAACATCGTAG

>novel\_circ\_001361

TCTAAGAATATTCTAATCTCTAACCGTTGATGTTCCGTCTCCTTTTGGATTTTCTTCGGTG  
TTAGGGGTTCCATTTTATGGGCATGGAAGTTCTCCTGATTATTTTCCCTTATTCGTGTTT  
TTGTTTTTTTCCCCATTTTAGAGAGTAGGGCATCTCGAGAGGGTCTTGAAAATTATTTT  
TTTTTTATTTTCTTTATTTCTTATTTCTTTTATGTGTTTTTTCGTTTTTTTTGTATTTTGTATT  
TTTCCACAAAGGGCAGTGGTTTTACCACGAGACAATATTTTGGTGTCTCACACCTTT  
CACACACAATTCTTCGATCTTTAATTCGTCGTCATTTTCGTACGTAATTTATGGTCTTACG  
TATGGACACTACTACTAAAACTTTAATACTCCTCCTTTTCTGTTCTTCGTAATTCATCATA  
CTCCAAACACTTCTTCTGTAATCTGTAGTAATCGTGGGTTTATTTTTTCGTGACGCCGTT  
TTATTGACCTTAATCGTGTGTGTGGAAAGAGGTCCTTCCATCCGTGGATAAGTTTCCAGC  
TGCTGGACTTGAAGGAAAAACCAAAGGAGACCAACGAGGATTCGAACCCTAGAACTT  
CTT

>novel\_circ\_001362

ACGAAGAACAGAAAAGGAGGAGTATTAAAGTTTTAGTAGTAGTGTCCATACGTAAGAC  
CATAAATTACGTACGAAAATGACGACGAATTAAAGATCGAAGAATTGTGTGTGAAAGG  
TGTGAGAACACCAAAAATATTGTCTCGTGGTAAACCCTGCCCCTTGTGGAAAAATA  
CAAAAATACAAAAAAA

>novel\_circ\_001363

TACGAAGAACAGAAAAGGAGGAGTATTAAAGTTTTAGTAGTAGTGTCCATACGTAAGA  
CCATAAATTACGTACGAAAATGACGACGAATTAAAGATCGAAGAATTGTGTGTGAAAG  
GTGTGAGAACACCAAAAATATTGTCTCGTGGTAAACCCTGCCCCTTGTGGAAAAAT  
ACAAAATACAAAAAAA

>novel\_circ\_001364

ACGAAAAATAAACCCACGATTACTACAGATTACAGAAGAAGTGTTTGGAGTATGATGA  
ATTACGAAGAACAGAAAAGGAGGAGTATTAAAGTTTTAGTAGTAGTGTCCATACGTAA  
GACCATAAATTACGTACGAAAATGACGACGAATTAAAGATCGAAGAATTGTGTGTGAA  
AGGTGTGAGAACACCAAAAATATTGTCTCGTGGTAAACCCTGCCCCTTGTGGAAAA  
ATACAAAATACAAAAAAA

>novel\_circ\_001366

TGAACGCGAGTAGCTACATAGTGTGAGTGGTCTCGTCCTGATAGTCGGAGCACTGGT  
GGGTGTCTTTCGACGGTATCGCATCATCTTCATCATCGTAGGCTGCTACTGCACGAGC  
CTGCTTCCGCCTCGATCTTGCACCACCATCGGCATCATCATCACCGCCATCATCATCATC  
ATCATCATCGCGAGGAACTTCCGGCGTTCGCACCAACGACGCCTCCTGCTGCAGGACCA  
CCACCGTCATCCTGGGACGCCG

>novel\_circ\_001368

TAGCCTGTGAAATGCAAACGGTGTCAATTCATGTTAGTGTGGCGCGTCAGAAAAAG

AAAAAAGCAAAGGTGATGGTCCGAAGATAATAATACCTGGCAACTGTGCTGAATCGT  
CTAAACCAATTCTGGAGCCTATGTGTAAAAATGCTATAGTGCTTGGAGGATCTGATGGC  
TTTGGTTTTGCAGCGGCTGATCATCTCTTGCTCAAAGGAGCACGTGTTGGTGTTTTCTA  
CTGTCGTAATAGCTGATCATGATCCTGAAGAAGGGAGAATAGCAGTCGAAAGACTGTG  
CAGTTTTTCATGGAAAAAATCGCTCATACTACGCTCATTATAATATAATGAGTGATTGTCAT  
AGTCACAGTAGTTTACACGATGCTCTTTGCAAACCTCAAAGTGATTCATATTATTTTAAAC  
AATGTTGATAAAGAAAAGACATCGAATCCGAAGATCGAAGAAAACACTATACACAAAA  
CGATTCGAATAGGCTTGGAACCTTTTAGGGGAAGAATAATGGTGGTTCTGGCGGAATAATA  
ATAAACTGTGCGAGTATTTTCGGGTTCTTGGGATGGCCTCAAGATCCATTCCCAATTTAT  
TGCAACAAAGAACCTGCTATAGAAGTCACCCGACATTTTCGCGAAAAAGTATAATGTGG  
AAACAACTGGAGTTCGTTTAGTGGCACTTTGTCCAACGAATAAACACCTTCGCGACAT  
AGGATTGCCAATTTTCCAGACCCTCTTCCAAATAAACTATGTGTGAATTGCCAACTT  
GTATTCCGCATTTCGAAGTATCACATAGGAACAGCTGTAAGTCATATATTAGCGTGGGCA  
AAAAACGGAAGTGCGTGGTTGGTTCGAACCTGCAATCAGCGTCAATCAAATTCCTCAAT  
TACTTCATTTCCGGAGAAGGAAGGCGAACAAGTTGACCCCAAAGTCTATGAAACACA  
A

>novel\_circ\_001369

ACTCGTTGGAGGCGCCAGGGACGAGCAAGCGGTTTCAGATCCTCTACAGAAACGAGG  
AGGTGACACTCGGCACGTCCGTCCTATTCCGTGCTCACGTGCTCGTGCACAGTCACAA  
GATCGAGGAGGTGCTTTCCCGAACCCACTTCAATCTCGGCGTCGAGCTATGGTTCAGC  
GAGCCAACGCAGCCTGGGAACATGGCCTGCGTGTCTCTAGGTGAGGCAACGTCTTG  
GCCCCATAGAAACGCGGCGATCGGCCGAGCGTGAGGCTTGGGAAACAGATTGCGGT  
TTCTGGAAGGGAGATTACTACAAGCGTTATGGAAGAACCGGCGTTGCAGCTGAACTTC  
GCGCCACGAAGGGACTTCACTATCATTTGCCGGTGCTCTTCGATTACTTTCATCTTGC  
CGCAGTCTCCATCACGATCCATGCCTGCCTCGTGGCCCTTCATCAACCCTATATCAAGA  
AGAGCATACTTCATTATGTGCAGAGCTGCGCGCCGCGTGAGGGAAGCCGTGGCTGCA  
ATTTAAACAGTCTGCAGCGAACGGAGACAACAATGCCAGTTAGGAAATATCGAAACG  
ACGACGAGATGCGTCGGCTCGGCCACGAGAATCCAACACGCGAAACTGGTTCAGCAG  
GAAGTAATCAGGTTACTTTTGGCCGCAAGGGAATCTTTGCTCAACGACTTGGCCGATT  
AGCGCGGTTGCTACCTTCTTGCCAGCAAAGGGCGCTCGAGCTCGCTCAGAACACGCA  
CAAAGAAATTACCAAGTTGCAGATGATGGACACGGAGGAAACCGATATCGCTCAACTC  
TGCGCACAAAATATCGTTCTCTGGCAACACTTTCTGGAGGTGTTCTCGGGGCGTGAAG  
CTGTTTCATCAACACCTTGCAGAGGATCCATCATCAATTGAGGGTGAAACGTTTCGCGGA  
AGGTTTCTTCGTGTTGGAGAATCCCAGGACGTCTGCGTGGGGTTGTTACGACGCGAAT  
TATCAGTCGTATCAGGCAGTGAGCGAGGCTGCACGAAGATCGCGATATCTCGCCTCTTT  
GCCTCCATTGCCTGTGCATTGTCCGGAATTGGACGGAGATCTTCATTCCCTGCCTTTGAT  
CTTCGAGGATCAGTACGTGGATATGAAACAGAGGCACAGAAACAGCG

>novel\_circ\_001370

GTTGCCTCGGACGTTGAAACGTGGGGACATGATGGGAGGAAGGAGCCGGGAACCTCG  
GCCAGACCCTGAACGACAGTGTTTCATCCCTCGTGAATCGTCGCGACGTGCGGAGCTGG  
TCTTCGTTTCGATTAAAGGGGAGGATTGGAAGGACGAAGGGTGGAGTGGGTTGGCGTC  
GCGAGCGGCGTGATCGAGATGAGCGATCTACAGGCCACACTCGAGTTCTCCCTCGAGC

TTTGCAAGTTCTACAATGTCGACCTGTTCCAGCGTGGGTATTACCAGATACGAACCGCC  
CTCAGAGTGTGCGCCGAAACTGCCTGTCAAGGTGGAGGTAAACCAGCTGCGGAACC

>novel\_circ\_001371

CAACATACCAGGCCATTCAAAGCCGCCGATGTACACCGAATTGCACCAGGATAACAGT  
TTGTCTTTGTTCTTCAACTCGCTGCAAGAGCAGCAGGCTGGGAAATACACGTGCAAAG  
CCACTTACGCGAATTTCGATTCAATTGCAGAAGTCTGTGACGATCGATACTATAGTTGCG  
ATCACTTGGGACAATGCACCGCTCAATCAATACCCATTCTGGGCGAGGACTTCGCTAT  
TCAGTGCAAAGTGCGGGCAAGGCCTTCGCCTTCGGTCGACTGGCTGTACAACGGCGA  
ATTAATTAAGACGAACGACCATTACATTATAGACACGTATGCACTGAAGATAAAAAATG  
TTCAAGAGTCGGATGATGGCGTTTACACTTGCCGCGCTTCCGTATTTTCCACCGGTGAG  
CTCAAGGAACGACCTATCCGCGTCGAGGTCCACATACGGCCACGGTGAGCGAGATGC  
CCAACCCCATAAACATGATCGAGGGAAAGGACGCGAGTATAAAGTGCGAGGCCCGAG  
GCAAACCCCCCCCCAAAATTACCTGGGTAAAGTCGTTGACCCACCAGAATCTGTCCAA  
CGTGGATCGTTTCTCGGTTCGATCCGGACACGGGCGTGCTCACGATACCAATGTGAAC  
AGGGACGACGCAGGGGAGTACCAGTGCACGGCCACGAATCTGGCTGGGACGGCGAA  
CACCAACATCATGGTGAACGTGATCGTCAAGCCCAAGATCATCGAGTTCTTGAACAGC  
ACGGTGGTTCGAGGACAAAGAGGCGACGCTGGTGTGCAAGGCGTTTCGGCAGGCCGCC  
CCCCAAGTCACTTTCAGGAAGCTAACCGCGGAGAAGGCGTACGTAAAGGGTCCCCA  
ATTGGACGACGACAGGATCATACTCGAGAACAGTGGCGATGACAGCGAGACCATCGG  
CACGCTGACCATCAGCCAGTCCCTCAGATCGAACGACGGTTTGTACGAGTGTATCGCG  
CAGAACGCCGGTGGTGACGCGCGTAGAATCGGCCATCTAACCGTCGAGTTTCCACCAT  
CGTTCGCCTCCATGTCGAACACAAGCGTGTGGTTCGTGGGACCAGAAACCCGTGAACAT  
CAGCTGCATAGCCGAGAGCATACCGAACGCCACCATACGTTGGACCATGTACGGCGAT  
CAGAAGATCGACAATGACAAGATGATCACGCAAATCGGTAACGGGCCACGATCTATAC  
TCACCATCGTCCCCTTGGACAAGCGGTATTACACCACTTACAAGTGCATCGCGTCCAAC  
GCGCACGGGACGCGGAACGGAACATCGAGTTGAGGGAGGCCACGAAGCCGGGCGA  
GATGTTGCAGGCGAAGATGGCCGAGATCACCGCGACCACGATTAGGTTTCGATCTTGTA  
CCGCCTAGTACGCATCCCGAGCAACCTCTCAGAACGATTAACGTGCAGTATAAGGAGG  
ACGGGCAGACGTGGATTACAGGCTAGGAACAAGACGTGGTCTGTTCGATTTCGTACTACGT  
GCTCGAAGGTCTGAAACCGCAGACTATGTACGAGTTCCGGTTCGCGGCCAGAAACGAT  
GTCGGTCTTGGTAATTGGGGGGCGTTACACCGCGAGATGACGCCCCGAAGGACGGTTC  
CTAACGAGCCGAAGATAGTAATGTCGAGGGAGGAGTACGATATGTCCAGGTACAGCAA  
TCAATACGAGTTGACCTGGCTGGCGCCGGCTGATAACGGCGAGCCGATCGACATGTAC  
CAGATCAAATATTGCCAAATAAGACGCGTTTCCGGCGAATGGGAGACGTTGGAGGATA  
CCTGCCGGACGGAGGACATTAGGACGCAGGGAAGAGTGAGGCATTGGTTGAGAAATC  
TCTACTCGGACACGTTCTACAAGGTTCGAGTTGAAGGCGCACAAACGCGATAGGTTTCAG  
TAAGCCTGGATCAGCGAAGTTTAAGACGGCCAGGG

>novel\_circ\_001372

TTTACGCTGCCGAGCCTTCCTTGGAGATTCTTCCGAGTGGAGAGACACAGACGAAGGC  
AATCGGGTCCAGCATCATTCTGACTTGTAATCCAAAGGTCGAAGACACAAAACCTGATC  
TCTGATATGCAATGGATCGATCCGCAAGATCGTGTGATCGAGCCTTTGAAACTCGTCGT  
TTTGCCGATCGAAAGCAACATAACCAGGCCATTCAAAGCCGCCGATGTACACCGAATTG



CACCAGGATAACAGTTTGTCTTTGTTCTTCAACTCGCTGCAAGAGCAGCAGGCTGGGA  
AATACACGTGCAAAGCCACTTACGCGAATTCGATTCAATTGCAGAAGTCTGTGACGAT  
CGATACTATAGTTGCGATCACTTGGGACAATGCACCGCTCAATCAATACCCCATTTCTGG  
GCGAGGACTTCGCTATTCAAGTGCAAAGTGCGGGCAAGGCCTTCGCCTTCGGTCGACTG  
GCTGTACAACGGCGAATTAATTAAGACGAACGACCATTACATTATAGACACGTATGCAC  
TGAAGATAAAAAATGTTCAAGAGTCGGATGATGGCGTTTACACTTGCCGCGCTTCCGTA  
TTTTCCACCGGTGAGCTCAAGGAACGACCTATCCGCGTCGAGGTCCACATACGGCCCA  
CGGTGAGCGAGATGCCCAACCCCATAAACATGATCGAGGGAAAGGACGCGAGTATAA  
AGTGCGAGGCCCCGAGGCAAACCCCCCCCCAAAATTCACCTGGGTAAAGTCGTTGACCC  
ACCAGAATCTGTCCAACGTGGATCGTTTCTCGGTGCGATCCGGACACGGGCGTGCTCAC  
GATCACC AATGTGAACAGGGACGACGCGAGGGGAGTACCAGTGCACGGCCACGAATCT  
GGCTGGGACGGCGAACACCAACATCATGGTGAACGTGATCGTCAAGCCCAAGATCATC  
GAGTTCTTGAACAGCACGGTGGTTCGAGGACAAAGAGGCGACGCTGGTGTGCAAGGC  
GTTTCGGCAGGCCGCCCCCCCAAGTCACTTTCAGGAAGCTAACCGCGGAGAAGGCGTA  
CGTAAAGGGTCCCCAATTGGACGACGACAGGATCATACTCGAGAACAGTGGCGATGAC  
AGCGAGACCATCGGCACGCTGACCATCAGCCAGTCCCTCAGATCGAACGACGGTTTGT  
ACGAGTGTATCGCGCAGAACGCCGGTGGTGCACGCGCTAGAATCGGCCATCTAACCGT  
CGAGTTTCCACCATCGTTTCGCCTCCATGTGCAACACAAGCGTGTGGTTCGTGGGACCAG  
AAACCCGTGAACATCAGCTGCATAGCCGAGAGCATACCGAACGCCACCATACGTTGGA  
CCATGTACGGCGATCAGAAGATCGACAATGACAAGATGATCACGCAAATCGGTAACGG  
GCCACGATCTATACTCACCATCGTCCCCTTGGACAAGCGGTATTACACCACTTACAAGT  
GCATCGCGTCCAACGCGCACGGGACGCGGCAACGGAACATCGAGTTGAGGGAGGCCA  
CGAAGCCGGGCGAGATGTTGCAGGCGAAGATGGCCGAGATCACCGCGACCACGATTA  
GGTTCGATCTTGTACCGCCTAGTACGCATCCCGAGCAACCTCTCAGAACGATTAACGTG  
CAGTATAAGGAGGACGGGCAGACGTGGATTTCAGGCTAGGAACAAGACGTGGTCTGTC  
GATTTCGTA CTACGTGCTCGAAGGTCTGAAACCGCAGACTATGTACGAGTTCCGGTTTCG  
CGGCCAGAAACGATGTCGGTCTTGGTAATTGGGGGGCGTTACACCGCGAGATGACGCC  
CGGAAGGACGGTTTCTAACGAGCCGAAGATAGTAATGTCGAGGGAGGAGTACGATATG  
TCCAGGTACAGCAATCAATACGAGTTGACCTGGCTGGCGCCGGCTGATAACGGCGAGC  
CGATCGACATGTACCAGATCAAATATTGCCAAATAAGACGCGTTTCCGGCGAATGGGAG  
ACGTTGGAGGATACCTGCCGGACGGAGGACATTAGGACGCGAGGGAAGAGTGAGGCAT  
TGTTTGAGAAATCTCTACTCGGACACGTTCTACAAGGTCGAGTTGAAGGCGCACAACG  
CGATAGGTTTCAGTAAGCCTGGATCAGCGAAGTTTAAGACGGCCAGGG

>novel\_circ\_001374

CGGAAACCTCGCAAGGCACCACATCCCCAGACACCGTCCAATGCGGGGCGTGCAAGG  
TGTCCTACCCCTTGGCGAGATCGTTTCGGTTCATCGAGCACAAGGTGAACCACTGTCTG  
GATCAATCTTCAAGGTTGCCACAGTCCACCAGCAACCGCTGCGCCGGAAGACTCCGAT  
CCGGAGGACGCGCTCGCCCTGAAGACCGTCGACCAAGACTCGAAGCTGAACTCGGTG  
CCCAGCATCTCGGCGCCCATTAACAAGAGGGGTGGCGGCAGATTGGAGAGCCCTCCG  
ACGCCTCAGGGCTCCGGCCCGGAAGCTGGAAGCCCGATCGAGCTGAAGGCGAGCGCG  
AGCTCGACACCTAAGAGGCGAACGGAAGCCTCGAACGAGGACAAGGAAGATCTGCC  
GAAGAAACAGAAGACGGAGTCTGTGACGCGGACACCAACACGGTCAATTTTG

>novel\_circ\_001375

AAGCATGACAGCGATCTGTTTCGTGTGTAATCTACCGATCCTGAGCCACCAGGTCGGCC  
TGGTGTGGCAAGGTGGAAATGGATGGGACGATCTTATGCGGGAACAGGTCGAGGAATC  
CACCTTGAAACAACGTCTTGGAAGTGGAAAGGCGCGATTTCGGCGACACAGATCACTTC  
GATATCCCCGCCAAACGAGCCGCAAGAACCTGCGACCAATCAACGTCGACGACGATCG  
AGCTTGGCACAATTGACAGATATTTTGC CGAATGGAGCGGGGGTGGCGGTGGAAAG  
GGCGAGCGGGGGAACAAGCTGTATCGTCGCGAAACATTGGGAGATATAGCGAAATCTT  
TTCCGTGGTCCAGGCAAACGACCACGGATGCGAGCCATCTTGAGAGGCTGCGCAAGA  
GGAGGGAGAGCTCGGTGGACAGCGGGATCAGAAGCCAGTCGTCTACGAAATCGAGAA  
AAGATTCAACGATCACCGAGCTGAAAAATGATTTTGCCAGATTATGGGGAAAGAAGGA  
GACGCCTCAGCCGCAACCACCCCTACGGTTATTTGCGCCACCTATCGAGGGTTCAGA  
GAGAGCGATTTCGAGAGGATCTCGACGGGGGTCAGGGGAGAGCGGAAGGGCGAAAAA  
TCAAGGGGAACGGAAGCATAATTGCCGTCACCACAGGCGCAGGCAATCGCAGCAATC  
GCAGCAATCAATGGACAGTGGAAGCGGCGTGATGCCCCGTGAAATATTACAGAAGCGAT  
CAAAGACCGAGCGCTTCGAGTACGGATAGCGCGGCCAGCAATGCTGTTCAGAGAGCAT  
TTGGAAGCGCGTAATTCCATGGACAAAGGCGAACGATCGAGTAGTATCGAGGGCAAAA  
CATCCGTGACAACAAGTAGCGAATCAAAAACGTCCACCACGACTACCACCACAACGTGT  
GTCGTCGACGACTACCGCGGTGACCACGTGACCACAGTGACGATGGAGCCGAAGGC  
CGCGACCGTCGTCGACAGTAAAAATTTAACCCCTCGAGTCGTCCATCACTACCCCTACCA  
TCGTGATGTCATCAGTGACGCCACCAAGCGTCTCTCCAACGGTGGGTAGCAGCCTTCC  
ACTTCCAGGAACCTCGACTTCCGGTAGTTCCAGTCCCGTTGGCTCGCCAAACGTCAAC  
ACACCGACCCACCCATTGATTAGCACTAGAAGAGACTCGACCACCCAGTGTTATCAGA  
AGGGAAAGGAAGTATCACCGAACAAGTTGTCGAGATTGATACGGCAATCGGCTGCCAT  
AGATGAGTCGATGCCACCAGCACGACGACGAGGAAGTCAACCGACATTGTCACCGGA  
TACTGACGAAGGAGGACGAAGAGCTCGAAAAGACTCGCTGAGCCCCGATTCCGCTTC  
GTATCCGAGGCGCCGTGATTCTGAAGAGCCATCTGAGTCCAGAGAGAGCAGTCGATAAA  
AGAGACATCAGTCCTATCAGGGAGAGATCTCAGCTGACGCGACAGTCAATGTCGATGG  
CAGGACGGTCGCCACCAAGATCACCGGATAGTTCTTCTGTTCTCAAGGGATCCAAG  
TCCGTGTGCTCGTGCTCCAGGAAGTATACCTCATGCTCCTATTGGAAGAAGACAATCGA  
CAACGGACGAGATATTTATTGCTCGTGATTTAGGCGGCAGAGCACCACGGAAGAGAC  
AATAAGATGTCGAAACTTTCTGAAGACAAAGTTTCGAAAGTGAAAACTGGTTCAAAG  
ATATCAAGGACGAAGAGACAGTTCCACACAAATCACCGATGGAACATTGCTACCATG  
TCTGTTCGAGATATCGAACACGTTTTTCGATAGCAGCACTCAGACTGAACCATCACCATT  
GTACGACAACAATCACTATCATGAGGAATGTCTAAAATGTAACAGCTGCGGCTTGAATC  
TCACAGGACCCAATCAGAAACGGGCTAGACGGTTCAAGAACCAAATACTTTGCGATCT  
TCACTTCGCTGACGTGGCGCTGATGGAGTGCTCGGACTTCATGCAGCAGTTGCGCAGC  
TTCAAACCACAAAGTTTAGGCTGCGCAGTTGCCCGAAGGAAGTCATCAACCACTTTAA  
TCTTCCCCTTACCACCGCAAGCTTGTTTCAG

>novel\_circ\_001376

AAGCATGACAGCGATCTGTTTCGTGTGTAATCTACCGATCCTGAGCCACCAGGTCGGCC  
TGGTGTGGCAAGGTGGAAATGGATGGGACGATCTTATGCGGGAACAGGTCGAGGAATC  
CACCTTGAAACAACGTCTTGGAAGTGGAAAGGCGCGATTTCGGCGACACAGATCACTTC  
GATATCCCCGCCAAACGAGCCGCAAGAACCTGCGACCAATCAACGTCGACGACGATCG

AGCTTGGCACAATTGACAGATATTTTGC GCGAATGGAGCGGGGGTGGCGGTGGAAAG  
GGCGAGCGGGGGAACAAGCTGTATCGTCGCGAAACATTGGGAGATATAGCGAAATCTT  
TTCCGTGGTCCAGGCAAACGACCACGGATGCGAGCCATCTTGAGAGGCTGCGCAAGA  
GGAGGGAGAGCTCGGTGGACAGCGGGATCAGAAGCCAGTCGTCTACGAAATCGAGAA  
AAGATTCAACGATCACCGAGCTGAAAAATGATTTTGCCAGATTATGGGGAAAGAAGGA  
GACGCCTCAGCCGCAACCACCCCTACGGTTATTTGCCCCACCTATCGAGGGTTCAGA  
GAGAGCGATTTCGAGAGGATCTCGACGGGGGTCAGGGGAGAGCGGAAGGGCGAAAAA  
TCAAGGGGAACGGAAGCATAATTGCCGTCACCACAGGCGCAGGCAATCGCAGCAATC  
GCAGCAATCAATGGACAGTGGAAGCGGCGTGATGCCCCGTGAAATATTACAGAAGCGAT  
CAAAGACCGAGCGCTTCGAGTACGGATAGCGCGGCCAGCAATGCTGTCTAGAGAGCAT  
TTGGAAGCGCGTAATTCCATGGACAAAGGCGAACGATCGAGTAGTATCGAGGGCAAAA  
CATCCGTGACAACAAGTAGCGAATCAAAAACGTCCACCACGACTACCACCACAACGTGT  
GTCGTGACGACTACCGCGGTGACCACGTGACCACAGTGACGATGGAGCCGAAGGC  
CGCGACCGTCGTGACAGTAAAAATTTAACCCTCGAGTCGTCCATCACTACCCCTACCA  
TCGTGATGTCATCAGTGACGCCACCAAGCGTCTCTCCAACGGTGGGTAGCAGCCTTCC  
ACTTCCAGGAACCTCGACTTCCGGTAGTTCCAGTCCCGTTGGCTCGCCAAACGTCAAC  
ACACCGACCCACCCATTGATTAGCACTAGAAGAGACTCGACCACCCAGTGTTATCAGA  
AGGGAAAGGAAGTATCACCGAACAAGTTGTCGAGATTGATACGGCAATCGGCTGCCAT  
AGATGAGTCGATGCCACCAGCACGACGACGAGGAAGTCAACCGACATTGTCACCGGA  
TACTGACGAAGGAGGACGAAGAGCTCGAAAAGACTCGCTGAGCCCCGATTCCGCTTC  
GTATCCGAGGCGCCGTGATTCTGAAGAGCCATCTGAGTCCAGAGAGAGCAGTCGATAAA  
AGAGACATCAGTCCTATCAGGGAGAGATCTCAGCTGACGCGACAGTCAATGTCGATGG  
CAGGACGGTCGCCACCAAGATCACCGGATAGTTCTTCTCCTGTTCTCTCAAGGGATCCAAG  
TCCGTGTGCTCGTGCTCCAGGAAGTATACCTCATGCTCCTATTGGAAGAAGACAATCGA  
CAACGGACGAGATATTTATTGCTCGTGATTAGGCGGCAGAGCACCACGGAAGAGAC  
AATAAGATGTCGAAACTTTTCGAAGACAAAGTTTCGCAAAGTGAAAACTGGTTCAAAG  
ATATCAAGGACGAAGAGACAGTTCCACACAAATCACCGATGGAACATTGCTACCATG  
TCTGTGAGATATCGAACACGTTTTTCGATAGCAGCACTCAGACTGGTAAGTTCATAAA  
TTTCATTTCATCATTTATCACAGATGAGATATAGACGAGATATTTCAAGGAGGGAATTTTT  
TCCAAAGATATCGGTAAATTTATCCTTCCAAAAAATTTTACTTTTTTAAATAAAAAGAAT  
AAATTATTAATTACACGCACACTCATATTTTTACGTAAATCTTATCAAAGAATAAAGTAC  
TTTGTCTTAAATCCTTCCAAATTTCTCGTCTCTCATTGTAAGTATAATATTATCTCATTGT  
ATATAGTCATAGACAATCATTCCTCCATAGACAAAAGATTTTTTTATCACGCATGTGAT  
CCTTGTTTCGTCAATTGATCCAAATATCTCTTCGTTCTTCGATACTTTCATCGATTTC AATT  
AATCGAAATAACTTCAACCCCATCTATCCAAAATCCACTACAAAAATTATATCCCCTCGA  
TTCATCCTTGATCATCTATCTCCCAAAAGCACGATACAACGAACACAGAGATTGGAAG  
ATCGGTTAAATCCCCTCCTCCACAAATTCGAATTCGAATTTTCGCGGCCAGTGCCAATATCT  
CTCGACCATAATCGAATCGAACGACGGCATGCGCCCTGGCAACGGCGTTTCGCCGTTGG  
TAAGCCGGCTTCGCGACGCCGTGCAGCGTCTCCGTGGACGCAGGCGTGGTGTCAGCTC  
CCCTAGTTCCGACAATGTGACACTGGGTGCATGGCAGTCGATAGCCAGCCGAAGAGGA  
AAACCAGCCTCGAGGAGCTGCTAACTCTAAACGTGTGCGTGCTCTTTTCAAACCCCT  
TCGTACGTCGTTCCACGTCCATCGTGTATCCTCGAGGAGCGAGACGAGGGGAACATCC  
TCCCTCCCCCTCGAACAGAAATATCAACAGCAATGCGACTGTAGAATCGTGGAATCGT  
GAAGTGAACCTCGGGTGATCGTGATCGGATTGTTGCCCTGATCGACGATCGAATAACA

CACACACACACACACATACACACACACATACACACACACAGACCATCCTGTCTGGA  
TGGGACGAAACATCGATTCTCAGGTATCTGACGAATATCAAGAGGATCGACCATGACTT  
GAATCTGATCAAAGGAGAAAAACAAAGTGTTTTCCATTAGGAGGTGTTGACAAATCAA  
AGTCCTGCCGTCGATGATCACCTGTTCTGTGTTGTGTTTACTCGAACGACGAGTATTTTT  
CAGCCTGTAATTAGGAATAATTTAGGAATCCGATTTGAGAGAGAGAGAGAAGGGCTCG  
ATTTTCCACGTTGGAACGATAGGTGGTGGCCTTCGAACGGTGATCGAAGGATCGATCGA  
TCCTTGATAAACGTGTATACAAAAATTCGTCTTAGAAATCGCATCCATTGTCTGACACC  
AGGGCACCAACCACTTGTGGCCGTGTGGTGGGCGGGTATCACGAGTAGTAGTTGAAA  
GCCGGCCAGAGACACACTTGTGCACCAGCAGATCTCTTTGGATATCGTCTGTTTCGAG  
GGAGGGCGATCTGTGATCTTGGACTGGGCGATCCGATCCAAATCTTCGATGATCAGAGA  
TTTTTGTGTTGTTGATCGGTGGTGC GCGCTCGAGGATGTTTCGTTGGTGGTGTGTTCTGT  
GACATGTGACACGGAGGTGTGCGACGAGTGTGATGGGAGAAAGGACTCGTCGCCACG  
ACGAAGGATTCCAGCGACGGGATGACGTTGTTGCCGCCTCTCGACGTGCTCACGCTTT  
CTCGGAG

>novel\_circ\_001377

AAGCATGACAGCGATCTGTTTCGTGTGTAATCTACCGATCCTGAGCCACCAGGTCGGCC  
TGGTGTGGCAAGGTGGAAATGGATGGGACGATCTTATGCGGGAACAGGTGAGGAATC  
CACCTTGAAACAACGTCTTGGAAGTGGAAAGGCGCGATTTCGGCGACACAGATCACTTC  
GATATCCCCGCCAAACGAGCCGCAAGAACCTGCGACCAATCAACGTCGACGACGATCG  
AGCTTGGCACAATTGACAGATATTTTGC GCGAATGGAGCGGGGGTGGCGGTGGAAAG  
GGCGAGCGGGGGAACAAGCTGTATCGTCGCGAAACATTGGGAGATATAGCGAAATCTT  
TTCCGTGGTCCAGGCAACGACCACGGATGCGAGCCATCTTGAGAGGCTGCGCAAGA  
GGAGGGAGAGCTCGGTGGACAGCGGGATCAGAAGCCAGTCGTCTACGAAATCGAGAA  
AAGATTCAACGATCACCGAGCTGAAAAATGATTTTGCCAGATTATGGGGAAAGAAGGA  
GACGCCTCAGCCGCAACCAACCCCTACGGTTATTTGCCCCACCTATCGAGGGTTCAGA  
GAGAGCGATTTCGAGAGGATCTCGACGGGGGTCAGGGGAGAGCGGAAGGGCGAAAAA  
TCAAGGGGAACGGAAGCATAATTGCCGTCACCACAGGCGCAGGCAATCGCAGCAATC  
GCAGCAATCAATGGACAGTGGAAGCGGCGTGATGCCCCGTGAAATATTACAGAAGCGAT  
CAAAGACCGAGCGCTTCGAGTACGGATAGCGCGGCCAGCAATGCTGTCTAGAGAGCAT  
TTGGAAGCGCGTAATTCCATGGACAAAGGCGAACGATCGAGTAGTATCGAGGGCAAAA  
CATCCGTGACAACAAGTAGCGAATCAAAAACGTCCACCACGACTACCACCACAACTGT  
GTCGTGACGACTACCGCGGTGACCACGTGACCACAGTGACGATGGAGCCGAAGGC  
CGCGACCGTCGTGACAGTAAAAATTTAACCCCTCGAGTCGTCCATCACTACCCCTACCA  
TCGTGATGTCATCAGTGACGCCACCAAGCGTCTCTCCAACGGTGGGTAGCAGCCTTCC  
ACTTCCAGGAACCTCGACTTCCGGTAGTTCCAGTCCCGTTGGCTCGCCAAACGTCAAC  
ACACCGACCCACCCATTGATTAGCACTAGAAGAGACTCGACCACCCAGTGTTATCAGA  
AGGGAAAGGAAGTATCACCGAACAAGTTGTCGAGATTGATACGGCAATCGGCTGCCAT  
AGATGAGTCGATGCCACCAGCACGACGACGAGGAAGTCAACCGACATTGTCACCGGA  
TACTGACGAAGGAGGACGAAGAGCTCGAAAAGACTCGCTGAGCCCCGATTCCGCTTC  
GTATCCGAGGCGCCGTGATTGCAAGAGCCATCTGAGTCCAGAGAGAGCAGTCGATAAA  
AGAGACATCAGTCCTATCAGGGAGAGATCTCAGCTGACGCGACAGTCAATGTCGATGG  
CAGGACGGTCGCCACCAAGATCACCGGATAGTTCTTCTGTTCTCAAGGGATCCAAG  
TCCGTGTGCTCGTGCTCCAGGAAGTATACCTCATGCTCCTATTGGAAGAAGACAATCGA

CAACGGACGAGATATTTATTGCTCGTGGATTTAGGCGGCAGAGCACCACGGAAGAGAC  
AATAAGATGTCGAAACTTTTCGAAGACAAAGTTCGCAAAGTGAAAACTGGTTCAAAG  
ATATCAAGGACGAAGAGACAGTTCCACACAAATCACCGATGGAACATTTGCTACCATG  
TCTGTGAGATATCGAACACGTTTTTCGATAGCAGCACTCAGACTG

>novel\_circ\_001379

TTTCCTGGTGAGTGCATCCTCACATACATGGAGTTTCAGCTGGATAGTGCAGAATACTG  
CCAGGCTCAACACAAGTAGAGAGACACGCCCAAATACCCTAGAATTTGCTAGGTACTA  
TTAAAAAAGAAATAAGGAAAAAACATCTTAATCAGGCAAAAAAATTTTTATAATATTG  
GGATCATTGCCTCAAAGTCAGAAAATCATCAGCTAGTCATCACGCAAAACATAGAAGA  
ATTAAATAGAATCAATTGTTAATTTACAATATTAAATGCAAGCATTGTAGTTACTGAGCG  
CACCTGATCCAGGCGCACCCAGTGCCAAATAGATTATCTTCCGAATCATAGTCAAGGAT  
CCCAAGTGGGAATCAATCGCATATCAACAACGCCTAATGTAACGTAGCCCTCACCCCTT  
CAGTGAAATTTGCACCTTAACAACCTTTTTCGAGGTCTACATGTAAACCCATTGTTCTGT  
CCTCTGTAAAAAATAACAAAGTATTCAATTAGTTAAATGAGAAATAACTTTATAAGAC  
TGACATCTATGGGCTAAGTTGTCAAATTCAGCCTTTGTTGCTTGATAGTGTGGCAAAAA  
TTGCAAAAATAAAGAGAAACAGTGTCTACAAAATTATTA AAAACATAAAAGTTAAAA  
TAATAAAAAAGTAGGAGTTTTACACCACTTGTTGTCCAAAAGGAAATGAGCAACATGA  
GGGTGAAGGATATCAGACCGGAGCCCGCCGAGATCGAATACAAAAACATGAAGTTCCT  
CATTACTGATCGGCCCAATGATCAGACCATTCTACTTTTTATTCAAGAATTA AAAAAGCA  
CAATGTAAAGAAGTAGTGAGGGTCTGTGAACCAACGTACAAAATTGAAGA ACTTAA  
AGCAGAAGGGATCAATGTCATAGATTTGGTATTTGACGATGGCACATTTCCACCAAACG  
AAGTTATCGATGAATGGTTTGAATTGCTAAAAAATCGATTCCGCGAGTCTCCAGATGCA  
TGTGTGGCAGTACATTGTGTGTCGAGGACTTGGTAGAGCACCGGTCTTAGTTGCACTTG  
CTCTTATTGAGTTGGGATTAAAATACGAAGATGCAGTCGCGTTAATTAGGGA

>novel\_circ\_001380

GCAAGCACGGGAGCACTCGGCGAAAAATGTGGACGGCGGAGCCGTAATTCAAGGATT  
TTGGTAGGAGGGAAGCCGAGGGACGCGAGGAAGCGGTGGAGGAGAAGGAGGAAGA  
AATGGCGTCCACGAGCGGGCACAAGAGGAACGGCTCGAGTTCGAGCATGTTACCCA  
CAAACGGACCGAGTCAGGCGGCGGTTTTATCGGGCACAACGCTCCGAGAGCGGTCA  
CAAACGTGCCGAGAGCATATCCAGTGCCTTTGGCCACAAACGATCCGAGAGTGGCCAC  
AAGAGGAACGAGAGCAGCGGGGGTGGTTTTCGGCCACAAAAGGTCCGAATCTGGTAGC  
AATTATCATGCTGGGCATCGAAGGAACGAAAGCATGTATGCTATGACTGGTCTGTACGC  
TGAGAGCGCGACCACGGGAACCGACGAGACCACAGACCCACTGCAAGCAACCGGTA  
GCAGACTGACTCATGACACCGTCATCAGGTGTCACAGTAGAAATCCCAGTTCTGGCCT  
CGTGGAACCATAG

>novel\_circ\_001381

GGATGGTGGTGAACGGTTTCGTGAACGTGGTCATAACCACGATAGAGAGGAGATTCCG  
TTTGAGGTCGTCTCAGACGGGGTTGATAGCGGGCGGATACGACATAGCCAGCTTCCTT  
ACCCTCGTCCCAGTCAGCTTCCTAGGAGGACGCTCGAAAGCGTCGAAACCGAGGTAC  
ATAGGAATAGGTGTTCTAGTCTTAGGCTTAGGAAGTCTGCTGTTTCGCATCCCCTCATTAC  
ATTGCTGGACCATACAGGGGTGGGCAACAGTCGGAAAATATTTGTCAAAGGGTGACGA

ATACGTCTCCCGTTTCGCTATCTTGTAGCGGATCAGTGGGCCAAATAGACCAAGAACCA  
TACAGTGGATTGTACTTAAGTATCTTTCTGATAGCTCAACTTCTACATGGGGCTGGCTCC  
GCTCCTTTTTTATACGCTTGGCGTTACGTATCTAGATGAGAATGTGTGCGAAAAAGATGTCC  
TCCGTGTACGTAGGAATTTTCTACACAATGGCCATAATAGGGCCTGCGTTAGGATACGT  
GGTTGGAGGTGAATTGTTGAAGCTCTATACAGACTTTATCACCGTGGATCCATCAAA

>novel\_circ\_001382

TCGGGGGTGCCGGACATGCACGAGACCCTGTCCAGTTTTTTCGGAACAGTTCAGGGAC  
GGGCCGACGAAGCCGGAATAAAGCCGGAAGCAGGTAAGGAGACGGAGAGGACGGT  
GGAGCCGAAGTGCAGTTGGTTCTGGTTCAGACCCAAATATTTGCAACGATTTCAACCC  
GCGAAATGGGCGCTCTTCTGGTTATGCTGGACAGGTGCGATGCAAGGTGGATAGGGTC  
GACGGTGACTGACGATAACCGGAAATCGAGTTTTCCGGCCCCGGTGGCAGGAGGTTGA  
CGCGGTGGAGGGTGGTGCAGCTCGACGAAAGGAGAGCGAGGATCGAGGCGAGAAGG  
GTGGCGAGACGAAGGTGCTCGACGTTGGCTAAAAAGGGGTGGAGGGAAAGGTTGGA  
ACACGGTAGCCGTATTCGGTTTAAATAAGTTTGTTCGCCCCCCTCTCCCTCTCCTCTCC  
ACTCGGCCGACAAAAGAAATCGTCGTGCGGAGGTTTCGTGCCTTCTTCGAGGCGGACG  
GGATTGAACAAATTGGTGGACAATGGAGCCGGCAATCGTCTGGATGGTGGTGAACGGT  
TTCGTGAACGTGGTCATAACCACGATAGAGAGGAGATTCGGTTTGAGGTGCTCTCAGA  
CGGGGTTGATAGCGGGCGGATACGACATAGCCAGCTTCCTTACCCTCGTCCCAGTCAG  
CTTCCTAGGAGGACGCTCGAAAGCGTCGAAACCGAGGTACATAGGAATAGGTGTTCTA  
GTCTTAGGCTTAGGAAGTCTGCTGTTTCGCATCCCCTCATTACATTGCTGGACCATAACG  
GGGTGGGCAACAGTCGGAAAATATTTGTCAAAGGGTGACGAATACGTCCTCCCGTTTCG  
CTATCTTGTAGCGGATCAGTGGGCCAAATAGACCAAGAACCATAACAGTGGATTGTACTT  
AAGTATCTTTCTGATAGCTCAACTTCTACATGGGGCTGGCTCCGCTCCTTTTTTATACGCT  
TGGCGTTACGTATCTAGATGAGAATGTGTGCGAAAAAGATGTCCTCCGTGTACGTAGGAA  
TTTTCTACACAATGGCCATAATAGGGCCTGCGTTAGGATACGTGGTTGGAGGTGAATTG  
TTGAAGCTCTATACAGACTTTATCACCGTGGATCCATCAAA

>novel\_circ\_001385

ATGCAGTTGTATTAATGGGAAAAAATACTATGATGAGGAAAGCAATCCGTGGTCATATT  
GAGCGTAATGCAGCACTTGAGAACTTCTTCCACATATTCGTGGAAATGTTGGTTTTGT  
TTTTACCCGTGGAGATTTAATTGAAGTGAGAGACAACTTTTAGAAAATAAAGTCAGA  
GCACCAGCTAGAGCAGGTGCCATTGCACCATTGAGCGTAATTATTCCTGCTCAAAATAC  
TGGTCTTGGTCCTGAAAAAACCTCATTCTTTCAAGCTTTGAGTATTCCAATAAAATTT  
CTAAGGGTACTATTGAAATTATT

>novel\_circ\_001386

GGCCGTGAAAGCATTCCAGCAGGTGCTATGGGTGGAACCAGGATTTCCACGAGCCTGC  
GAGGTTACCTACGGCTCGGCTTGATGCTGAAGGTCCACGCTGACTTTGATGCCGCCT  
TGAAGCACCTGACACTCGCTTTGATCGATGCCACGACACCTGCCTCTTTTTCCAAGCTT  
GAAATAAAATTTACATAGCTCATTTATACGAAGTCCAGGGGAAGTATCGTCTTGCTAA  
AGAACATTACGAGGCATTGCTCAAGGAAAAAACTCTGCCTTCGCACCTGAAGGCCGA  
CATTTGTGCTCAATTAG

>novel\_circ\_001387

GGGTAATAACAATACACCAAATTGCACGGGTTCACTGGTGGGCCTGGGTGGTGCTAAA  
TCAGGTGGTAATACCCCGATGAACCCATCGCTACAACAGCGGATCAACTTCCTCCAAA  
GTCATCTGAGCCAAGCACCAATGCCTTCCGTTGCTACCAAGAGGCGGCAACTGCCGTC  
TATAGAAGAGGCTTGGAACCTTACCCATTAGTGCTGAGATGTCTAGTAGACAGCAACAA  
CAGCAACAAACACCCACTGGTCCGGGTTATAAATATGGTTCCACTCCTTCTGGACCACC  
ACCTCCTTATCCTCAAGGACAAGGGCAGAATCTAAATACAAAAAGATTTAAGCCGGGA  
GAAGAACCAATTTCTCCAGGTTTACAACAGAGACCACCACCATTTTATCTCACGTCTC  
AACAACTGCAGATGTTACAGTTTCTTCAACAAAATCATGGAAGTTTAACGCAACAGCA  
GCAAGGTTTGCTTGCACAATTACAACAACAATACAGATGTATGCAACAACATCAACAA  
CAAATTAGATTACAACAGCAACAAGCTGCTCAAAGAGGTTTAAGGCCAGGACAACCT  
GGTTATCCTACAGGTTACAATCATTCACAACCTAGGACAATCTGGCGTGATCAAGAATTA  
CGGGATACCTCAGCAACCGTTGCAACAAGGTGGAACCTGTTGCATTACAAACAGGATTC  
TCAGATTCTAATGTCGGTTATAACACGGCAGCAACTGGGAACAGTCAAACACCAGGAA  
TGCCTTACAAATCTGCCTCTGATTCAAACCTATCCTCAAAGGCAATTGACATCCGGCCAA  
TATAACCAATATCAGCCTAACCAATACACTGCCCAGGGTTACACACAAATATCGTCCAC  
GACGAGTAATTATCCCGAAGGTTCCGCGGGAAATAAAGACCTGGGAGTAACAGATCAA  
GAATTACAGGCTTTGTTATCACAAAAAGATATTGCGACGTCCTTGGCGGAGGATTTATT  
GAAACATTTTGGTTCAGAAGATTTAGACGTAAAAGAAGAAGCACCGAGCATCATGAAC  
AATGGCACATTAAGTTCAGGTCCGTTCTCACCGTCAAATCTCGAAGAGAGTACAGAAA  
AAATCAAAGAGGTAAAACCTAGAGAAGGTTGAGGATAGTCAACCTTCGTCTACGTCGAA  
ACTCGAAGCATAACGAAAAAAGCAATACAAAGACATCGACTTCTGTAGTTGAGACGGTG  
AAATGTGAAGCGACTTCGAGTACAAATAAAATCGAATCAGTTGCTCGGATTGAACCGG  
TGCTTAAATTGGAAAGCTTGTGTGAATCACAACTGAACAAGAACTTAGTATAGATATG  
GATTCTAAGGGTATTATAGAAGCATGTAAAGGTCAGGGATTAAAAGGTGTACCAAATTG  
CTCCATTCTGAGTGATCGTTCACCTCCACCCGCTCCACCTGATCCTCCAAATCAGAGAC  
TAACCAAGGAACAACCTCTTACCCCCAACTCCTAGCGTTTATTTAGAGAATAAAAAAGAT  
GCGTTTCAAGTCCACAACCTCCAAGAGTTTTGTTTAAAGCATCCGATAGCTGTGATTGCGG  
TTTAGCAGCCGCTTTGAAATTAGATCTTGGATTGTTCTCAACGAAAACCTTTGGTAGAAG  
CAAATCCAGATCATGGTATCGAGGTAAGAACACAAATGCAACAGACCAGCGATGAGAA  
TTGGGAAATCTTTTATGAACTATTTAATTTTTATTTGAAACATTTTTTAATTTTTCAAA  
AACGAATGAGCAGATAAATCTATGGGATATTATATTTATCATAATCGAACTTTGTATATAT  
AAAATATGAGTAAAGTTAAAGTATTTCAATAGAGCTATTTTTTTTGTATTATATACTCATA  
AAATATATATAAAGGTTAGCTTTGTTTTTTAAAAAGAAATATATATTTTTTAATATATTGAT  
ATATTTCAATTTTTTTTAACTTATAAAAAGATATTGGAACAAGGTATTGTATGAACATTTA  
TAAGTTTGGAAGAAAATTGAATATAATTAAATATTTCTTAAATTATAATTTTTTAATTATAA  
ATATTTTTTTTATATTAAAGAACATATTGCATCTACTATCATATCAAAATATTTATATATATA  
ATTATATTTAAAAAAAATGATTTGAATATCATACCTTTATATGTTTACTTACAAAATCAT  
GAATTAATGAAAGTTTCCTCTTTGAAATCATTCAACTTTTATTTCAAATATTTTTTCGTTA  
CTAAGAAATTAAAATGATACTAAATGAGATGTTAATATTAATTTGATATTTATTAATTAATT  
AATTATAAATATTAATGTGATATTTAATAATACTCTTTATACATATTAATAACATATTAAT  
TGGTTGTCGTGAATTGTTTGTATAAACAATTATATTAACAATGATTTGTGTTTACATGTAA  
AGAAAAAAGTTTCGTAAAGTAAGAGATATTTCAAATTAATAATCGATGATAAGGAAGCT  
AATCTATAAATTCAGTGCATTTTCTTTAATGTATCTATCTTTCTTTAATGATCTAGTGATAG

ATAGAGATCGCTTACGAATTGTTGTTGATTGCAGAAATTCTGTGGAAAAATCTGAAGGA  
AATGCCGATACATGGTGTAGTATAGGCGTCTTGTATCAGCAGCAGAATCAGCCTATGGA  
TGCTCTGCAAGCGTATATATGTGCTGTACAATTAGACAAATCACACTCAGCTGCGTGGA  
CTAATCTGGGCATTTTGTACGAAAGTGTTAGTCAGCCAAAAGACGCTCTAGCTTGTTAC  
GTCAACGCATCCAG

>novel\_circ\_001389

ATTCAGAACTTCTACACATGTTGGAGCATAATGAATCGCTGAAAGCCAAGGTTGAAGA  
GGCCGTAGCTGTATTGCAAGCTCATCAGGCCAAACAGGCTGTGGCTTCTAAAAAGAA  
TAAACATTAATTAAGGTATTATTTTATTCTTCCTTAATTGTTTCGTAACAATGTTTCAGTTTT  
CTTCCTCATTCTGCGATTATCTTTGGTTTAAATAAATTTCTTCTGAAGCTTTATGGTGGCT  
TAAGCGATTATTACATGCAAGAATGACAGGAACAAATTGTTATTCAAACTAATAATTG  
ATCATGAAAGGGTT

>novel\_circ\_001390

ATCAAGGTGTAAATTTATATGTAAAGAACTTGGATGATAGTATAGATGACGAGCGGTTAC  
GCAAAGAATTTGCACCATTGGAACAATTACCTCTGCTAAAGTTATGATGGAAGAAGG  
ACGCAGCAAAGGTTTTGGATTTGTCTGTTTTTCCGCTCCTGAAGAAGCTACTAAAGCT  
GTAACAGAGATGAATGGTCGCATAATAGTTACTAAACCATTATATGTTGCTCTGGCTCAG  
CGTAAAGAAGATCGCAAAGCACATCTTGCTTCCCAATATATGCAACGTTTAGCAAATAT  
GCGAATGCAACAAATGGGTCAAATTTCCAGCCTGGCGGTGCTGGAAATTATTTTGTTC  
CCACTATTCTCAACCACAAAGATTTTATGGACCTGCACAGATG

>novel\_circ\_001391

AACGTCAACAAGAACTTAAGAGAAAGTTCGAACAATTAAAATTAGAACGTTTAAATCG  
TTATCAAGGTGTAAATTTATATGTAAAGAACTTGGATGATAGTATAGATGACGAGCGGTT  
ACGCAAAGAATTTGCACCATTGGAACAATTACCTCTGCTAAAGTTATGATGGAAGAA  
GGACGCAGCAAAGGTTTTGGATTTGTCTGTTTTTCCGCTCCTGAAGAAGCTACTAAAG  
CTGTAACAGAGATGAATGGTCGCATAATAGTTACTAAACCATTATATGTTGCTCTGGCTC  
AGCGTAAAGAAGATCGCAAAGCACATCTTGCTTCCCAATATATGCAACGTTTAGCAAAT  
ATGCGAAT

>novel\_circ\_001392

ATTCGCATATTTGCTAAACGTTGCATATATTGGGAAGCAAGATGTGCTTTGCGATCTTCT  
TTACGCTGAGCCAGAGCAACATATAATGGTTTAGTAACTATTATGCGACCATTTCATCTCT  
GTTACAGCTTTAGTAGCTTCTTCAGGAGCGGAAAAACAGACAAATCCAAAACCTTTGC  
TGCGTCCTTCTTCCATCATAACTTTAGCAGAGGTAATTGTTCCAAATGGTGCAAATTCTT  
TGCGTAACCGCTCGTCATCTATACTATCATCCAAGTTCTTTACATATAAATTTACACCTTG  
ATAACGATTTAAACGTTCTAATTTAATTGTTTCGAACTTTCTCTTAAGTTCTTGTTGACG  
TT

>novel\_circ\_001393

CTTCTTCAGGAGCGGAAAAACAGACAAATCCAAAACCTTTGCTGCGTCCTTCTTCCAT  
CATAACTTTAGCAGAGGTAATTGTTCCAAATGGTGCAAATTCTTTGCGTAACCGCTCGT



CATCTATACTATCATCCAAGTTCTTTACATATAAATTTACACCTTGATAACGATTTAAACG  
TTCTAATTTTAATTGTTTCGAACTTTCTCTTAAGTTCTTGTTGAC

>novel\_circ\_001394

AAACATTAGTGAAAAGCTTAGCTTTTTCTCCCAATTCCTTCTCGCGTTCTTTACGAGGTA  
TAAATTTGCCAACATATACCTTTTTTCCATTTAGTAACATGCCATTAACCTCTATCAATAGA  
TTTATTTGCTGCTTCTTCAGTTTCAAATGAACAAAACCATAACCTTTAGAAACACCAG  
ATTCATCTTGAGCTACTTTGCAACTAAGTATGTTACCAAATGCAGAGAAC

>novel\_circ\_001395

TTTTTATCTAAATTTTTTATAAATACATTTCCAACACCAGATTTTCGAAGAGAAGGATCA  
CGTTGAGACCACATGATACGAATAGGCCGCCCTTTATCATATCAAAGTTCATGGTATCA  
AGAGCACGTTCCGCTACAACAAAAAATAACAAACAATTATATTATTATTATAA  
TTAAAAAATATATAATTTTCGTAAATATTTCTATTAAATTTAATTATTTTTTCTTAATTTA  
TTTAGTATATATAATATCATTATTTTAAAAAATATATTCAATATAAATTACAGATTTCAAA  
ATATTTCCAATTATCTTATGTATATTCTAAATGAATCATAAATAAAGTTACATTACATTGAA  
TAATAATTTGAAAAATATATTAATAATGAGAACATATTGAAGAACTAAAATACGTCGATA  
GAATCATGTGGTATTTTCCTTTTTTCTTTTTATTTTTTTATTCAAGTTATAATTGTATATGTAT  
ACAATGAATATGTTGTATATTAATCTTTTACTTTTTTAGAATATAATAAATTCATATCAAG  
CTGTTTCGATATCACCTGGAATGAAAAAGAAAGTAATAAAAAAATAAGGCATGACTC  
AACCAACCGTCAATTGCTATCTACTTTGTTTCGAAATAGGTTTCAATATGGTGGTATCGTA  
TGATCCGAAACACGTGTCAAGCACGGACAAATGATGTAACAAACAGTAATTTTTTTTTTA  
ATCTAAAATATTTGATTCAAAAAGAAATAATGAAATATAGAATCATTATACTCACCATCA  
GCCGTTGCTGGAAGTTAACATAAGCATAACCGAGCGAACGTCGGGTATCATATCACG  
ACAGACGCGTATCGAGAGTACAGGCCAGCTGATGAAAACCTCTCGAAAAGCATCGCC  
TCGGTGATATCACTATGCAAGTCACCCACATAAAGTGAGGCCATAGGGTAATTCGGA

>novel\_circ\_001397

GTCGAAGCCCGAACTCAAGGATGCCGTGGGTGAGGAGACAAATTATCCACCACCACT  
GAAACCCGCCTCCCCCCCCTTGACCGCCTTAAAACGAATACTGCCAGCCGCCTCGAGG  
CCATCGATATCGAAACGAAGCGTCTCAACCGATCACCAGGACGAAGACCAAACCTAC  
CCCATGGATCTAACCGAGGCATTCGCCCCGGGAGGGGGTGGAGAGGAGCTGCCAAAG  
ACCGACTTCTTCGACTTCGTCGTCTCTCCACCTCCCCACTGCGCCTCCGCAGATGGCGT  
GTCGGACGAAGAAAGCTTCCTCCATCGCACCACCTGCAGGAGCATCGGCTACCTTCAA  
CAAGGTCACGAGGAGCACGAGACCGGTCGGGAACATGCATGGCTCCCCGTTTCATCAAG  
GAAACGAACAACAACACGCTGACAGCTTTACCACCTGTCTCGACTATCACCGGCTCCC  
TCAGCCACCATCATCATCACCACCACGTGAGAACGCATCACACCGCCTGCAACGTTCA  
ACAGAGCAACGAACAGACACCGATGGACCAATCCGACTGCGACTATTGGGGCACGGA  
CGAGAGCAAGGAGCAAACCTGTAACATACTCCTGGAAGATCTGAACAAGTACTGTTGG  
TCGGCTCACGCGAATGCCAGAGCCACGGGAACGACAACGTGAACGTTACACAGGGT  
TCGAACGAGCATCACCAAGGGGTGGGTCGAGGATGCTCGGCGAACGACAGACAGAAC  
ACGGACGGGGCGATATACACTCTCACCGTGTTGAACAACGAGGCGAACTCGATGGAC  
GCGTTGGACTGTTGCAAGAGTCCAGCCCCAACGTCAAGCGACTCCTGGTCGCTCAGA  
CCTAACCTAGATCTGGACGCTATACTGAGCATGGAGCCGGCGTCCGCCGAGCAGGAAC

ACGACCAATCGAATACCGTGACAGAGGTTTCGCGGACGGTGAACGACAGGTTTCACC  
CGGACCGTTTTCTCCGTCGCCTCCTCGCAGTACGCGACCGACGACAGCGGTTTCGTCGA  
GAGCAAGGAGTTGTGCGGCCGAGGCGCATCAAGCGGCGGCAATTGCACCGGCGGCGG  
CGACAACAACAACGATTGGAAGCTGTCGGATCAGAATCTGCAGGAGGCTGCGGCCGC  
TGCCGCGGCCGCTGTCGCTGTCGGCGCCGGCGACTCCGCCGAGAGCCTGCTCAGGAG  
CGTCTTCAAGGCAAACGTGTACACAGGCCCTGCCCAAGTGGTGTCTCCTCGTCGCCG  
ACCACCCAAGGCTCCGCTATATCGATGCCTGTCACGAGCAACGCCGTTTGCAGATAGT  
CACCGATCAACAGCAGCAGCAGCAGCAGCAGCAGCAGCAGCAACAGCAGCAACAGC  
AACAACAGCAGCAACCGCAAACGCAGCAGGACGAGTCCATGCACACGTGCACCGAC  
GAGGACTTGTTGCTCTCCCAACTGGACCAAACGACCTATCGCCCGGGCGACTACGAGA  
AGCTGAAGAGCATAGCGAACGAAGTGGTGGAGTCTTACTGCAGCCTGGAACCGGTTT  
GCAACGTGTCGGCAACGACCACGGTTATGTACACGTTGGACCCAACGAGCGGTAGCCT  
CGGCACGATCACGCTTCCCGCAGATCTGGGTCAAGTGAGCACGGTCACGGTGGTGAC  
AGTGCTCAGCAGGAGGTTCTCCAGCAACAGGCCGCGCCTCGAACGGAGGTGGAGCA  
GCAACAGTCCGCCAGCCAACTTCAAATAACCCCGTCGCGAGTCGTCACGACGAAAGC  
CCCGAAGAAGTACTGCAGGCGCGCGAACAGGAACAGCAGCAACGCGAACGCGGCCA  
GCAATGGGAGCAGCGGTTCTGAGACGGGTGGAAGCACAGGCGGGCAGCAACAGGGT  
GGTTCGGGCGGCTCGCCTGGCAGCGTGCAACGGAAGGAGCGCTCGTTGCATTACTGC  
AGCATCTGTAGCAAAGGTTTCAAGGACAAGTACAGCGTGAACGTTTACATTAGAACGC  
ACACGGGCGAGAAACCGTTCGCCTGCTCCCTGTGCGGCAAGAGTTTCCGCCAGAAGG  
CGCATTTGGCCAAGCACTACCAGACCCACGTGACGCGAGAAGCCCAGCGTTCAGCAAC  
AGGCGGGCGGCGGTGGCGCCAGTAACAATGGGAATAGCGGGAATCCAAGCCCGTCTG  
GCGAGACGAGCGGCACGACAACCTAGCACCGTGACGAACAGGAGTCAATCACACCAG  
GTGTCGGTTCGATCCCGCGGGGAACGCCTGCAATCCACCTAGTTAGTCGCGTTGGATGG  
GCCAGACAACCTACTTCCGACGGTTCCCAATTGGATTGCAGTTAATCCTTGCTACTCCA  
TTTACTCTAACTTTCCCGGTGGCACGGTGCGGAAAGTGGATCGGCGATTTTGCACGATG  
GTGATGGTCAACGAAAGGATACACC

>novel\_circ\_001399

AAAAAAAAAAGAAAAATCATCCGTCATTTCCGTTTCGTGTAACGCTTACAGCGATACTT  
CCTGTCTTATTTTATATAATTAATTCTTCGCCACTAAGTGGCTGTTTCTCGATATTGTTA  
TTATCTAAATAATGTGCTCTGTTTCTTAATTATTAATAAATAATATATATAATTGCTCTGAT

>novel\_circ\_001401

AAAATATCCTGTACGTCGATCGTCGAAATTCTTCATCGCGTGCCTCTTTTCTCTTCGAA  
TAAAAATATAAAAGTCAGATGGAGAGAAGCTGGTTAATGCGACATCGAAAACCTCCAAT  
TTTCACAGATTGGTAGTAACAACGAGCCGTCGCACGAAATGTTGGCGTGAAATGCGGA  
GACCTTGAGCGGATAAGAAGGAACGGTCGAGGGTCGCACATGTTTTATCTGGTCGCA  
GTGCAACATCAACGTCTACTCTTGTTGAAGACGGGAATTCCACGAAGTATGGGTCCAG  
CTCGAGGGCCGTCCAGTCCGGAGAACATGCTGACGCCATATTCTCCGCGATCTTATATC  
TCGAGGGGCTCGGGAGGAGCTCCGTTCCGCATCTTCAAATTCTTCTTCTTCTTCT  
TCTTCGTTG

>novel\_circ\_001402

AGAGTTATACACGTCGACATTAACGGTACGAAAAGTATAAAACAATTCCTACTACGCGTC  
TCCTTGAATAATCTCCGAATATATCAGTCTTAATTCGACTTCGAACACGATAACATCGGG  
CGCCGAACCAAAACAAGAGAACTGCGACGTTCTCGAGACGGAGACCAACCACGGC  
GATCCTGTTGGCCGCCGTAGGAGATGAAAATGCGATCTGTCGGTGGAGGGGAGGGTGT  
ATGGCCGGCGCATCGACGCGTATCGACGGGTGCGAAAAACCGCGGCAATCTATCCGGG  
GATTGCTCGTGGAATCGGCTCGAGAAGGCGGCCCTCTCTGATTTCTGGTGTTCCTTGCG  
CGGCGATGTGCCGCTTTGGCCGCTGCCAAGGAACGAAAGATAAACAGGCATAGCAGA  
A

>novel\_circ\_001403

ATATCCGTGAGGCAAGGATACGTCGCGGCCACTACCTGCCAGGTGGATCTGGTTCCTG  
GAATTTCTTCCTCTTTGTCCGTTTCGTTTCGCTCGTTTCGCTCGGCGGAAGACACGGTGCGC  
GCGCGGACACACGAGGTGATCATCGGCACCTGGTGATTCAATGCTCGGTACGGGCGC  
GACGAGAGGAGGACGACGACGGATACCCGTGGCGTGATATCGTGCGAGTATTATTCTC  
CAAGTGTCTTCGATATCCCTACGATAATAGAAAAGTAAATCTGTGGAGAGAGAGAGAG  
AGAGATGTTCTCGAGCTGCATCGGGACGAGTGTCGAGGTTTCTCGTGGAACCAAGCTG  
GTGGACATGGAAGCATGAGAAC

>novel\_circ\_001404

CTATATTTTCATCAGAAGATTCTGTGGATGATCCAGATTGGATTTTCGAATCCGAAAAAA  
AAAATATGAAACAATCTACTTGTATTTCAACAAAAAATCGTCAAAAACCTTATTCTCGT  
CCTTCAATTGAAGATAAAAAAGTTTCGAAAAAAGAACAATAAAAAATGCAGCCACA  
CGATATAGACAGAAGAAAAAACAAGAAATAAAGAAATATTAGGTGAAGAACGTGAA  
CTTACTGAACATAATGAAAAACTAAAAAATCAAGTAACAGATTTACAACGAGAAATTG  
GATACTTAAAAGGCTTAATGAGAGATTTATTTAAAGCTAAGGGTCTTATTAATAATCCA  
TTTATATATGAACTATGTTAT

>novel\_circ\_001405

TGTTTGAAGCTTCACGAGCTATGAGAATATAGGACAAAGAAGAGGTGCCCTGGGAAAC  
GTGAAGTTAAGCAGTTTCAACGGTTTCCTCGCCGCACACGCGGAGGGGAATAATTTT  
CCTTTTTAACGACGACCTCTCTTTTCGCTGTCATTAGACAAGTTTCTACATGAAAACATT  
ATGGGATCCAGGATGGAATCTAAAATGTTGAAAGACGACGAGAAGGACAATATGAGGC  
TATTTTGCGCTCAGAACGACGATGAATCGTCGACGATGAACACCAAAGATGGCTCCAG  
AGGGGGCAGGAAGCAGGAAGTGGATCGCTTCGGATACTATCAAATGATCATGTTTCGCG  
ATAATCAGCCTGCCTCTGTTCTTGTCAGCAGGATTCACGCTTGCCTACGTGTTACAGC  
CGGGGAAGTTAAATACAGGTGTACGGTGCCAGGATGCGAGAATTCATCGAACACGCAA  
TTCAACGTGCCTTGATGATTGATTCCGTCCCGGATGTATCCGAGACGTCCAAATGCAT  
CCGTTATGTCGTGCAAAATCACACAGGGGCGTGCAAAACGAACTTTTCAGTAACGTT  
ACCAAAAGGTGCGATTTCGTGGATCTACGATCCATCCGAGAATACGATTCAAAGCGAGT  
GGGACATCACCTGTGACACCAATCGATGGAACTCACTCTTGTGGGCACAGTAAATAA  
CATCGGTCAATTTCGTCGGGCTGATCTTCGCCGGCTACATATCGGACAGATATGGAAGAC  
GCACGATACTGACGCTCACCACATCCCTGAGCGGAATCAGCGGTCTGATACATTCTTC  
TCCGTGAATTATTGGATGTTTCTCGCGTTTCGAATTTATCGACGCGACTGTGCGGGCCGGT  
ATCTACAGCGCTGGATTTATTTTAGGGATGGAGATGGCAGGGGTAAGAGGCAGAGTATT

AGCCAGCACGATTATCTGCTGCATGTTTCGCAGTCGGTGAGATGTTACTCGGATTGATAG  
CGATGTGGCTTAGATCATGGCGATTGATCCTTCGCATGGTTTACGGGCCGGCATTGCTG  
GCCATCTTATTGCCGCTCCTTATCCCAGAATCAGTCAG

>novel\_circ\_001406

CCTGAACCTACCAGCACACCGTCCAGCACTGAACCAGATACGACAACGAGCCCTGAA  
CCGAGCAGTACACCGTCCAGCACCGAACCAGCTACAACAACGAGCCCTGAACCTACC  
AGCACACCGTCCAGCACTGAACCAGATACGACAACGAGCCCTGAACCTACCAGCACA  
CCGTCCAGCACTGAACCAGATACGACAACGAGCCCTGAACCTACCAGCACACCGTCC  
AGCACCGAACAATCAACGAATACTGAACCAAATACGACAACGAGCCCTGAACCTACTA  
GCACACCATCCAGCACCGAACCAGATACGACAACGAGC

>novel\_circ\_001407

GTTACGGGCTCGTTGTCGTATTTGGTTCAGTATTCGTTGATTGTTTCGGTGCTGGACGGT  
GTGCTGGTAGGTTACGGGCTCGTTGTCGTATCTGGTTCAGTGCTGGACGGTGTGCTGGT  
AGGTTACGGGCTCGTTGTCGTATCTGGTTCAGTGCTGGACGGTGTGCTGGTAGGTTCA  
GGGCTCGTTGTTGTAGCTGGTTCGGTGCTGGACGGTGTACTGCTCGGTTACGGGCTCG  
TTGTCGTATCTGGTTCAGTGCTGGACGGTGTGCTGGTAGGTTACAGGACTCGTTGTCGTA  
TCTGTTTCAGTGCTGGACGGTGTGCTGGTAGGTTACAGGGCTCGTTGTCGTATCTGGTTC  
AGTGCTGGACGGTGTGCTGGTAGGTTACAGGGCTCGTTGTCGTATCTGGCTCGGTGCTG  
GACGGTGTGCTGGTAG

>novel\_circ\_001408

CACACCGTCCAGCACTGAACCAGATACGACAACGAGCCCTGAACCTACCAGCACACC  
GTCCAGCACTGAAACAGATACGACAACGAGTCCTGAACCTACCAGCACACCGTCCAG  
CACTGAACCAGATACGACAACGAGCCCTGAACCGAGCAG

>novel\_circ\_001409

CTGCTCGGTTACAGGGCTCGTTGTCGTATCTGGTTCAGTGCTGGACGGTGTGCTGGTAG  
GTTACAGGACTCGTTGTCGTATCTGTTTCAGTGCTGGACGGTGTGCTGGTAGGTTACAG  
GCTCGTTGTCGTATCTGGTTCAGTGCTGGACGGTGTG

>novel\_circ\_001410

GTGGTGCTGTGCTTCGAACGGATCTTCTGGGATCCGACCGCCAATTTGTTTGGCCACGT  
GGGGAGCACGACCGCGTCGCGTGGTGAGCTCTTCCTCTTCTGGAATCTTTACAAGGCG  
CCGGTGCTGTTGGCCCTGGTCGCTGGAGAGGCTGCCTGTGTCATGGAGAATGTCAGCG  
ACGATGTGATCGTTGGACGTTGCATAGCCGTCTTGAAGGGTATCTTCGGAAACCAAGT  
GGTTCCGCAGCCGCGCGAGAGTGTAAGTACGAGATGGCGAGCGGATCCATGGGCGAG  
AGGCTCGTACAGCTTCGTCGCGGTCGGCAGTTCCGGTAGCGATTACGATCTTTTGGCCG  
CCCCTGTCGCGCCCCCTGCCACCCCTGGCGCACCGCCGCCGAGCCAGGGTTTTCTT  
CGCAG

>novel\_circ\_001411

TTCGCAACGGCTACTCGTGCGTACCTGTTGCTCTGTCCGAGGGCCTGGACATCCGGCT

GAACACGGCTGCAAGGGCGGTCCGCTACGGGGTGAACGGGGTGGAGGTGTGGGCCG  
CACCTCGCGCAGCCCCACACAAATCACACGGTGTACAAGGCGGACGCGGTGCTGG  
TCACCCTTCCCCTCGGAGTGCTCAAGGCGTCCGCGCCGCGTCCGCGGTTCGCTTCAA  
TCCTCCGCTTCCGGAAGTCGCAGGCTATTAGAGGCTCGGTTTCGGCAATTTA  
AATAAGGTGGTGTGCTGTGCTTCGAACGGATCTTCTGGGATCCGACCGCCAATTTGTTTGG  
CCACGTGGGGAGCACGACCGCGTCGCGTGGTGAGCTCTTCTCTTCTGGAATCTTTAC  
AAGGCGCCGGTGTGTTGGCCCTGGTCGCTGGAGAGGCTGCCTGTGTCATGGAGAATG  
TCAGCGACGATGTGATCGTTGGACGTTGCATAGCCGTCTTGAAGGGTATCTTCGGAAA  
CCAAGTGTTCCGCAGCCGCGCGAGAGTGTAGTGACGAGATGGCGAGCGGATCCATG  
GGCGAGAGGCTCGTACAGCTTCGTCGCGGTTCGGCAGTTCCGGTAGCGATTACGATCTT  
TTGGCCGCCCTGTGCGCCCCCTGCCACCCCTGGCGCACCGCCGCGCAGCCCAGG  
TTTTCTTCGAG

>novel\_circ\_001412

TTCGCAACGGCTACTCGTGCGTACCTGTTGCTCTGTCCGAGGGCCTGGACATCCGGCT  
GAACACGGCTGCAAGGGCGGTCCGCTACGGGGTGAACGGGGTGGAGGTGTGGGCCG  
CACCTCGCGCAGCCCCACACAAATCACACGGTGTACAAGGCGGACGCGGTGCTGG  
TCACCCTTCCCCTCGGAGTGCTCAAGGCGTCCGCGCCGCGTCCGCGGTTCGCTTCAA  
TCCTCCGCTTCCGGAAGTCGCAGGCTATTAGAGGCTCGGTTTCGGCAATTTA  
AATAAG

>novel\_circ\_001413

GTTACTTCGGCAAGTATCTGAACAAGTACAACGGATCGTACATACCGCCCGGATGGCG  
GGAATGGGGAGGTCTCATAATGAATTCACGGTACTACAACGAGCGTGAACATGAAC  
GGGAAGAAGATAAAGCACGGGTTCGAGTACAGCAAGGACTATTACCGGACCTGATAG  
CGAACGACAGCGTGACTTTTCTACGCCAAAGTAAACACAATTCGCACGGAAGCCGGT  
GATGCTGGTCGCGAGCTTCCCGGCGCCCCACGGCCCGGAGGATTCGGCACCCCAATTC  
TCGCATCTCTTCTTCAACGTCACCACTACCA

>novel\_circ\_001414

ATACAAAACGACGAGCTGTTCAAATTTCTTTGGGAAAGGGAGACGAGTTCCGAGAAA  
CTCTATCACTCGGAAAGGAGCCGAAAATTTCAATAAAAAGTCCCGTTGTAAAGGGAAG  
GAGGCGAGACACGAGTCTAATTGCGAGAGGATTTCAAAGAGGATTCGCGACGTTAAC  
GACTCGTCCACTGACCCGTATATACGCGTCCCGGATAAGGACGAATTTTCGCCCTCGAT  
GTGGCCGCAAGCCACCCATCCAACCGAGATTTACCGTCCTTTATATTTAGCATCGAGAA  
AGGCGGCCCTTTATTGAGACGTCATCGGTAAACGCAAAACGAGAGTAATGCGATTGGC  
CCCTGGTCTCGAGGTGGTCCTCGCCCGCCACGCAAAAAGTTGCCCGTTCCGTCCAAA  
CCGAATCGGCCTCCCTTCCCTTCCCTCCTCGTGCAACTGTTATAAATAAGCCCCCTT  
TCCCCCTCGTACGCTGTTGATAGCGACGGTGGGTACAGGTATGTAAACGCTGCCGCG  
GCTACCAACGAAAGGGACGGCGTGGTACTTTTGAATTAATTATTTGATGGTGCCCCGTA  
TGAATAATTCAAACGGTGCCCCGAGATGAATCCGAGAAGACCGATGCGCCTTGCCGTG  
TGTGCATCGAGGGGTTGGCCCGGAAAATGGGATTGCCTTTTGTATTATCGCGGGAGG  
AAAATTCCTTGGAATCACCAAGTTGAGAAACGTGAATCGTGGGAGGGAATTTTCAT  
CATTACGTTACGTTTCTCGAGGCGAACGAGTAATCGGTTTCGCGAACATCTTAAAAAGC

GAATTAATCGAAGTGATAGATTCCGCGAAGAGTTAATCGTTGATTAGAGTATTTCGAAGG  
AGAGGGGGGGGGGGTTGGAAAAACGGGAGCAAAAAGCAAGCCGGGGTAATCGATCT  
GTTACATGAGTCAGTTCCTGCGACGAACCGAGCGTGTCCATAGCACATTAATTACTATT  
GCGATAGCCGGCCTCTGCTAGAGATATTTCTTTTATTAAGCCCGGTTGAAACGAGCCCT  
GCCACGCCTCGTGATCATTACTCACCACGACGGCAACACTCTGATTTCGGTGCCTTTTTT  
TGCCGAACGCCCTCGATCCTATTGAGACAAACCGAGTACGGGCTTATAAGTACATATAC  
GTGTGACAGGGGAAACAAAGAGCGTACTAATCGAAAGAATAGTGTGTGAATAGATTTA  
ACGCGTTCAATGCGCCGCGTTAGGGAAAAAAGAGAAAAAAAATCGTACGGACTCCT  
CTCGACGGTGGATATTGACTTTTGATAAATATAAAAAACAGTTATAAAAAACGCGAAATT  
ATTACTGAATGGGAGAGAATGGAAGAGAAAAGCCAGATACGTAGAAACGCATTTTCATA  
TTTCTTGGAATAATTCATGACGCGACTGTATGCATCATTACCATAAAATATCCATAGAA  
ATCTCCATGACGCATACGGCATTACATCGTTTACATCGAATGTATTAGGATGCAAATAC  
ATTTTTTCAGTTTCATAAAAGTTTCCAGAATTTTTATTTCTCATTTTTCTCTTTATTGATCG  
ATACGTTCAAGATAAAAATTAACGGATTAAATTATTTCTTGTAACAATCTTTTAATTATA  
AAAATACCACCCGATTACTTCTCGACTCTTCAGAATTTTGCGCGATACCATTATAAAAAT  
TAATCGAATCGATGATATTTTATACGATTCTATCGTTCGAATCGTGGAATATCGAGGGGTC  
GATTCGAGCTTCCCTAGCCTCGGCTTTCCGCAGCAGAGTGTAATTCATTTTATCACGAA  
CACACGTTCCAGGTTACTTCGGCAAGTATCTGAACAAGTACAACGGATCGTACATACCG  
CCCGGATGGCGGGAATGGGGAGGTCTCATAATGAATTCACGGTACTACAACACTACAGCG  
TGAACATGAACGGGAAGAAGATAAAGCACGGGTTTCGAGTACAGCAAGGACTATTACC  
CGGACCTGATAGCGAACGACAGCGTGACTTTTCTACGCCAAAGTAAACACAATTTTCGC  
ACGGAAGCCGGTGATGCTGGTCGCGAGCTTCCCGGCGCCCCACGGCCCGGAGGATTC  
GGCACCCCAATTCTCGCATCTCTTCTTCAACGTCACCACTCACCA

>novel\_circ\_001415

CAACAGACCGCCATGATATGACACTGGATTGAGAGGAAGAGCGTGCAACCGACGACC  
AACCACCATGAGGAAGTTACTGCAGTTTTTGGCGGTGATATTGTTGGGTGTCAATGCCA  
GGCGGACGGACGCCGACGCCCTGTGCGACGACGTTTACGGTGGTCAGCGTCGTGGCT  
CCCTTCACAAGTCTAATTACAACAACAACAACAATGGGAACAACAATTACAATTC  
TCAGCTGAACTCGCCCTATCTCCCGTACCAGCAGCCCAGGGAAAGAAAGCCGAACATA  
GTGCTGATTCTTACGGACGATCAGGATGTGCAACTCGGTTTCGCTGAACTTCATGCCACG  
GACCCTAAGGCGAATAAGGGACGAGGGGGCCGAGCTAAGACACGCATACGTGACCAC  
TCCTATGTGTTGTCCAAGCAGGAGCTCGTTGCTGACCGGCCGTTACGTTTACAATCACG  
AGGTCTTTACGAACAACGACAACACTGCAGCAGCCCCAGTGGCAACGAGATCACGAGC  
CGCACTCGTTTCGCCGCTTACCTGAGCAACGCTGGATATCGTACCGGTTACTTCGGCAAG  
TATCTGAACAAGTACAACGGATCGTACATACCGCCCGGATGGCGGGAATGGGGAGGTC  
TCATAATGAATTCACGGTACTACAACACTACAGCGTGAACATGAACGGGAAGAAGATAAA  
GCACGGGTTTCGAGTACAGCAAGGACTATTACCCGGACCTGATAGCGAACGACAGCGTG  
ACTTTTCTACGCCAAAGTAAACACAATTTTCGCACGGAAGCCGGTGATGCTGGTCGCGA  
GCTTCCCGGCGCCCCACGGCCCGGAGGATTCGGCACCCCAATTCTCGCATCTCTTCTTC  
AACGTCACCACTCACCA

>novel\_circ\_001416

CAACAGACCGCCATGATATGACACTGGATTGAGAGGAAGAGCGTGCAACCGACGACC

AACCACCATGAGGAAGTTACTGCAGTTTTTTGGCGGTGATATTGTTGGGTGTCAATGCCA  
GGCGGACGGACGCCGACGCCCCTGTCGACGACGTTTACGGTGGTCAGCGTCGTGGCT  
CCCTTCACAAGTCTAATTACAACAACAACAACAATGGGAACAACAATTACAATTC  
TCAGCTGAACTCGCCCTATCTCCCGTACCAGCAGCCCAGGGAAAGAAAGCCGAACATA  
GTGCTGATTCTTACGGACGATCAGGATGTCTGAACTCGGTTCTGCTGAACTTCATGCCACG  
GACCCTAAGGCGAATAAGGGACGAGGGGGCCGAGCTAAGACACGCATACGTGACCAC  
TCCTATGTGTTGTCCAAGCAGGAGCTCGTTGCTGACCGGCCGTTACGTTTACAATCACG  
AGGTCTTTACGAACAACGACAACCTGCAGCAGCCCCAGTGGCAACGAGATCACGAGC  
CGCACTCGTTCGCCGCTTACCTGAGCAACGCTGGATATCGTACCG

>novel\_circ\_001417

CAACAGACCGCCATGATATGACACTGGATTGAGAGGAAGAGCGTGCAACCGACGACC  
AACCACCATGAGGAAGTTACTGCAGTTTTTTGGCGGTGATATTGTTGGGTGTCAATGCCA  
GGCGGACGGACGCCGACGCCCCTGTCGACGACGTTTACGGTGGTCAGCGTCGTGGCT  
CCCTTCACAAGTCTAATTACAACAACAACAACAATGGGAACAACAATTACAATTC  
TCAGCTGAACTCGCCCTATCTCCCGTACCAGCAGCCCAGGGAAAGAAAGCCGAACATA  
GTGCTGATTCTTACGGACGATCAGGATGTCTGAACTCG

>novel\_circ\_001418

ATTGGTATCGTCCCCGGCGAGGCAGAACGAGGCAGGTGGCAGCGGAGGCGGCGGCGG  
CGGAGCGATGCAACACGCGGCGACTTTCGCGGTGAGGGTGGGCACGATGGACGGTGT  
GGTGACGCATCATCTGCGCGCCGAGACGAGGAGGGACCTGGCCGCCTGGGCCAGGGC  
GATCGTTCAAGGCTGCCACGCGGCCGCTCATTCGTTACGCGAGTACACCGTTTCGATGC  
ACGTGGCAAGGGAAGGCATGCCAGCTGGTTGTAAACCACGAAGATGGGTTCGCGTTG  
TACGCGGCCGCGGCCAGAGGCGGTGGCAACGGGATGAGTCCAAGCTCTTCCCCGACT  
CCTCTTTGGAGAAGATCCTTCGATAAACTGAAAATGTCCGCTGACGATGGGGCGCGTC  
TACTGTGGCTCGACTTTGGCGGCGAGGATGGCGAGATT

>novel\_circ\_001419

AGGGTCGAATCCTGGAACCTTATTCCCCGGATGGAGTGCACGAGTGCTGGTTGAGAGC  
CGCGGATAACGCGGAGGCGAACGTGTGGTTCAACGCTCTGCACTCGGCTCTAGCAGCT  
CTCACACTGAAGGCGCTGCGACTGGCGTCCGCGCTTCCGGATCCGCCGCAGCTTCAGC  
ACATTGGCTGGCTCGCGAGGAGACACTGTCTTCAGGTGAGTGATCTCGCTCGTTTCGT  
TGCATGCGTCCCTCGAAAATCGAGAGTGTAAGCCGTGAAGATGGATCCGCGCCATCAT  
CGAACAACCATTTCTAATCTCGTATATCCTTTCTCTCGGGTAGAGATGATCGAAATTTGG  
ACGTTTATTATCCATGTATATAATTAATGATAAGTAATAAACACACACTGTACATTTATAAT  
TGTTTCTTTGATTCCGTGCGAGATAAATTTAATCGAGGAAAGGCATCGATTTTGAAAGA  
GAAATGGGAAAGAGGAGACGAGATACGGAGACGAGTTACAAAGTGTGGAATAATTAA  
AAGAAAAGGGATGAAAAGGAGGGATTAAATTGGCTGGGGAAGTAGTAAGAATTCATA  
GGGATGAAATGCAGCGGAATTAATAGTAGAGTTCCTCAATGGTGGACGGATAAACAGA  
GGATAGAAACAGAAATTTCTACAAAGGGTGGAAAGATGAAAAGTGGGATGGTTAATAA  
AAAGGACGAGGGGATGTAAGGGAAAACACGACTGGGATCGGCGACTGGAATGATTTG  
ACTGATAAAACGGCGTAGCTTGGGAGTTGGCAGCGCTGATTGAACCGGAAGAAATGG  
AAAAAGAGCTGCTAAAATATAG

>novel\_circ\_001420

AACTTCAAATTTGAAAGTTCCAACCTTTGGAAAAATGGAGGAATAGAATGAAAGAAAA  
CGAGAAGATAGATGGATTCATAGCGCGTGAACCTATCATAGAGCTACTTCCAAGTCGATG  
GATTCGTAAAGCAGAGCGGAAGTTTAATCAAGTTAAGATCCAAGATATCGACTCGACG  
AAAGCCGCGAGCTTCTTTCAATTGCACGGACAATTTTCTCGGCTTCTGGCTCACGTTTG  
ACAGTATGCCCCCTGCTCCTCCGCTCAACGAAGATTGGCCATGATTAACGGCATAACACGG  
CCCGAGCACGATCGATTCCCTCCGACCAATGTCTTCCCTCCATATTCGGTTAATTAAGTGC  
TCGTATCCTTCGAATAAAAACATCATTTCCAAACCCCTGCTTCTTGCAAATTTCCCAATGCA  
AAAAAAAAAAAAAGAACTACAATTTTCTTACTGAAAAAGAAAAAAAAAAAAAGAACCG  
AGATCCATTAGACTTTACAATGTCTATAAAACACGCACTAAATTCTCCACGATCGGGGA  
AAAGAAAGAGTAAAAAAGGGGAGAGAACCTAGCCCGAAAGATATACGTCTGTCAGT  
GGCTGTGTTATATCGCGGCAAGTGAATTATTGCCGGTGTGAAAAAAGGAAGGAGGGG  
GGGATCGACGAGATACACGAAAGGAAGAAGGATGCCTCGATATTAACCTCCCTTTATTT  
GAACAACCGGCGACCAACATCTCTGTTCAAGAATTTTTTTTCCATTCTCTCATTGCCTCT  
CTCATTGGGAATAAATTGGACGAACCGAATATCGATCGGTCCTTTTCCTTTTCGATCAATG  
GGGACGAAATGTATGACACACGCAGGACGAGTTCCTGATTCTCACGATCGAGAGAGGC  
ACACGACGAGGTCTCTCCCGCAAAGCTGGTGGTGGAGATTGAATCGGCGAGATGAG  
CGCCGCCTTGAAATAGGATCAACGTTTCGAGAGCCCTGTTCTCTGCTGGATTGGATTCTG  
GGGGGGGATCCTACGCGCGAGATATTACGCGAAGCGTGGAATTAATTCGGCGGGCTTT  
TTCGCCAATTGAAATTGTCGTTGAAATTGTATGATAACGTAACGGGACGTAATGTAATCT  
CGCCAATTAAAATATCAACGAAAACGTTGAAACCGAATGATTTTAATGGGGAAGGGAA  
GGGTATGGAATTAATTTTCGCGATACAATAACAATTTCTTCAAACGAATTTCCCCCTGTG  
AATTTGCAACGAGGGAAATAATGGAGGAAAAACCGTTTAATTGAGGAAAAAAAAAAAA  
AAAAGAAAAGAAAAGAAACGAGATATTCGATAAATATTTATTCGCTCATCCGTTTCATGA  
TTTATTTTCGCTTCGAGAAAACGTGTCTGGTTACGGTTTCGAGGAATGAGCAATGAGCAAA  
CGGGAAAAAGCTTAAATATAGAAGTGATGAAATAAGGAAAGGCAAGACCGCGAGCAG  
GTTATTTTTCAACCGGCCTTGCATAAGCTGATTTTCCGGCTGTTTAATTGTCAGGAAATA  
TAGGATGACTGAGGCAGAGAGGCTAAAGATATTGAATCATTCCGGAATAAAGGGAAAA  
ATAGCGAAG

>novel\_circ\_001421

GTAGGCGCGGACTCGATCCTAATTGACGGCGACGAATCAGCTCGCTAATTGACCAAAG  
GATCCTTCCCCTCCAAGGATGACGAGTTTTTTCGATAGTTTGGAGGAGTAGTAGTTTCAA  
AGAGACTTCTCGTCGGGAATCCTCGAGTCACGGATTGTCTCGGGACTTGTTCGGGGCT  
AATAAGAAGTAACCGAGATGTGGCCTAACTCCAACCGTTCCTCGGGATCAACGCGAGG  
AGAGAGGGGTGTCTCTCCACTGTCTCTCCGCTAAGGAAAGGAAAAGTTTCTTCTCAGA  
GTTTTCTATGATTTATTACTAAAGATAACACAAAGAATTTTCGCTTCGACAACTTAATTAC  
GCTGCCGTCTACAAGATCGTCGAAAAG

>novel\_circ\_001422

CGTGACGTTTTGGAGGAAATCGAAATGGTCGAGCTGTGCGGAAGCGGGCAACCGACT  
TCAGCGATGGGAGTGATGGGGATCGGTTCCGTTGTGTCCGCGGCTACGTCTGTCCTCGT  
CCTCGTCCACGACCACCACAGCAGCCTCGTCCTCGGCGTCTGGACGGGGCCGGGGTCTCT



GGAGACCCAAGTTCGTGGCCAGTGGTATCGCGTGTTCGTCTCGTTGGAGGACGATTAT  
CTGAGCATCTCGTTGGACGAGAGCTGCGAGACAGCAACGACGGGCAACAACGCCTTG  
AACAAACGGTAACATAAATAACAACAACGTGGACAGCCTGAACGATCCGGACGTGCCG  
GACTCGGTTCGCAATCAGAAACGTATCGTGCGCGTGGTGAAAAGCGACAACAACGGT  
CTCGGGATCTCGATCAAGGGCGGGAAAGAGAACAAAATGCCGATCTTGATCTCGAAGA  
TATTCAAGGGGATGGCGGCGGACGCGACCGAGCAGCTGTACGTGGGCGACGCTATATT  
GGCCGTGAACGGGGAGGATCTGCGCGAGGCGACCCACGACGAGGCGGTGAAGGCGC  
TCAAGAGGGCCGGCAAGGTCGTGAGCTTGAAG

>novel\_circ\_001423

ATATACGTTTCGAGGATCTCCAAGAAGCGGCACAATATTTGCTGGACCGGATCAAATTGA  
AGCCAAAACCTTGAATCATATGCGGTTCTGGAATGAGATCAAATGAGCAATACGAGTT  
GTGTCCAGGTTTCGCTGGCCGATTGTCTCGAGAATAAGCAGTACATCCCCTATCAAGAAA  
TCCCGCATTTTCTGTCTCCACCGTGAAGGGTCACCGAGGCCAGATGGTTTTTCGGTTAT  
TTGAATTCCGTACCAATTATGTGCATGCAAGGCAGATTTCACTATTACGAGGGTTATCCA  
CTTTGGAAGTGCGCCATGCCAGTAAGAGTTATGAAGCTCGTAGGTGTGACTCATCTGAT  
CGCGACGAACGCGGCGGGAGGTCTAAATCCCACATACAAGGTTGGCGACATTATGATA  
GTGAAGGATCACCTGAACATGATGGGTTTTGCGGGGAATAACCCTCTTCAAGGGCCAA  
ACGACGACAG

>novel\_circ\_001424

AATATAGTAACACAATTCTTGTTGCTCTATTAGAACACAAGTATTTTTTTCAAACCTTGTA  
TATAAAAGTTTATTATAAGTAAATAGTCTTGCTAAAATATATTTTTTTATAGCCTATTTAAT  
ATAAAAAGGCGAGGAGTCTTCGAGTTTTCTGTATTTCAAATAATAACACATCATGCTCG  
TTTGACGTCTCTATGCAGTCTTTTAAAACGCGAAGGCTATGCCTAGAAAA

>novel\_circ\_001425

TTTGATTATGTTGTTGATCATCAACACCAAGAACACGAATACTTGGTATAGTAGATTCTT  
CACTGGCATCACCAACAGTAGTACCTGTTACTGATATTGGTATTACTGAAACTGGGGTT  
TCTTGTTCTTCTGATGGTCCACTGCTTGTCTAAAAGTAAATCATTCATTAAATAATGGAA  
GTATAATATTATATAAAAATATTTAATATTTTTTATACCGAAGGTGGTAAATCAGCTGCTG  
GTGAAACTTGTAAGGAGTAGTAGGTACACTACGACCAGTACCACCATCTTCTAATTGA  
ACAAGATCTATTTCGTGTATCATCCATGCTTTCTTGAATTACTTGTGCTACACCAGAACTA  
GATGATCCAAATATCGTTCGAGTTGTTGATCCAGAAGGAGTTGATAACGAAGGAGTTGA  
TGAAGCAGTTGTTGGTGCAGATGAATCTCCAAAAGTAAAGCGTCCTTGAGGAACTTGA  
GGTGAACCTTACAGCTTCTCCAAATCCATCTCCTCGACGTGGTACAAATAAAGTTGGAGT  
ACTTGGTACTATGCTATCATCACCACCATCCTCATATCCTTGTTGTGGCTAAAAATCATTT  
TATTTAAATCTCTTCATTTCTTTTTACTTTATTATAAAAATAAAAATGATTACTAAAAGAA  
GATGTTGTTGTTGTTGTTGCCTAGGCATTGGTGCAATTCCACGTGAAGATCGAGTTGTA  
AAAGATGTAGGTGGTTCTCCTGTTGGTCCAGCACTACTAATTGCTTCTGATTGTTGTTGT  
TGTTG

>novel\_circ\_001426

ATACTGGCGCGCCCTACGTATTATACAAGGACAACATGGAGAGACCCCAGGGGCAATG

GGGCCCCGGGCGGGATCTCTCCAGGACGGGGGGCTGTACCCGCAGCAACAGCAACA  
ACAGCAACAGCAGGGCTCCTCCTCGTCCGGCAGCCCACAGCAGGCCTGTGGTCCCCC  
TGTCGAGGGAGAAAGCGGTCCCCCGCCTTCGTTGGCCTCTCCCGTGCCCTACCGTAC  
CCCTCGGCACCGCCTGAGCCTCAAGCCTTAACCCACCCGACGACGATATACAATCGA  
ATCAAGCCACCTCTCAACAGCAGCAGCAACAGCAGCAGCAGCAACAACAGCAGCAG  
CAGCAGACGCAGCAACAAGTGCAGCAGCAGCAGCAGCAGCAACAGCAGCAGCAACA  
ACAGCAGCAGCAGCAGCAGCAAGTTCAACAGCAGCAACAGCAGCAACAGCAGCAAC  
AACAGCAGCAGCAGCAACAGACGCAGCAACAGGACCACTCGCCCCAACAACAGTTA  
ACCCCTCACGAGGTGGATCGCGCGGATTGTTTCCCAGGGGCGGGAGAGCTGCAGCAG  
TATCCGCAGCACTACTTCAAGGATGCCAGGCCGCATCCGTGCGCGTCGGTGCCACCGC  
ACATGCTGACCCCGGGTGGTTTCTCCGCGTTGCACTATCTGAAGCAGCCGGGCGTGAT  
GCTCACGTCCCTCGGGCAGGGGGACGGTGGACCCAGCCTGGACGCGCACCAATACGC  
GAGCCCCGGGGCACCGAACATGGCGACCGGGCTGCCGGACATCGTCCAGCAGAGCGG  
CAAGTCTGGGAAAGGGGCGAACAGCGACCTACGTTTGTTCAGTGTGTTGACGTGCGG  
GAAAGATTTTAAGCAGAAGTCGACGTTGTTGCAACACGAGCGGATCCATACGGACAGT  
CGGCCATACGGGTGTCCAGAGTGCGGGAAGCGGTTTCAGGCAACAATCGCATCTAACGC  
AGCACCTGCGCATAACGCGAACGAGAAGCCGTATGCTTGCGTGTACTGCGAGCGTAC  
GTTCCGGCAGCGTGCCATCCTCAACCAGCATCTGCGCATCCACTCGG

>novel\_circ\_001427

ATACTGGCGCGCCCTACGTATTATACAAGGACAACATGGAGAGACCCAGGGGCAATG  
GGGCCCCGGGCGGGATCTCTCCAGGACGGGGGGCTGTACCCGCAGCAACAGCAACA  
ACAGCAACAGCAGGGCTCCTCCTCGTCCGGCAGCCCACAGCAGGCCTGTGGTCCCCC  
TGTCGAGGGAGAAAGCGGTCCCCCGCCTTCGTTGGCCTCTCCCGTGCCCTACCGTAC  
CCCTCGGCACCGCCTGAGCCTCAAGCCTTAACCCACCCGACGACGATATACAATCGA  
ATCAAGCCACCTCTCAACAGCAGCAGCAACAGCAGCAGCAGCAACAACAGCAGCAG  
CAGCAGACGCAGCAACAAGTGCAGCAGCAGCAGCAGCAGCAGCAACAGCAGCAGCAACA  
ACAGCAGCAGCAGCAGCAGCAAGTTCAACAGCAGCAACAGCAGCAACAGCAGCAAC  
AACAGCAGCAGCAGCAACAGACGCAGCAACAGGACCACTCGCCCCAACAACAGTTA  
ACCCCTCACGAGGTGGATCGCGCGGATTGTTTCCCAGGGGCGGGAGAGCTGCAGCAG  
TATCCGCAGCACTACTTCAAGGATGCCAGGCCGCATCCGTGCGCGTCGGTGCCACCGC  
ACATGCTGACCCCGGGTGGTTTCTCCGCGTTGCACTATCTGAAGCAGCCGGGCGTGAT  
GCTCACGTCCCTCGGGCAGGGGGACGGTGGACCCAGCCTGGACGCGCACCAATACGC  
GAGCCCCGGGGCACCGAACATGGCGACCGGGCTGCCGGACATCGTCCAGCAGAGCGG  
CAAGTCTGGGAAAGGGGCGAACAGCGACCTACGTTTGTTCAGTGTGTTGACGTGCGG  
GAAAGATTTTAAGCAGAAGTCGACGTTGTTGCAACACGAGCGGATCCATACGGACAGT  
CGGCCATACGGGTGTCCAGAGTGCGGGAAGCGGTTTCAGGCAACAATCGCATCTAACGC  
AGCACCTGCGCATAACGCGAACGAGAAGCCGTATGCTTGCGTGTACTGCGAGCGTAC  
GTTCCGGCAGCGTGCCATCCTCAACCAGCATCTGCGCATCCACTCGGGTGAGAAGCCA  
TACCAATGTCCGGAGTGCGGAAAACACTTCCGTCAGAAGGCGATCCTGAATCAGCACG  
TCCGCACACACCAAGACGTGAGTCCGCATCTAATCTTCAAGAATGGGATGACGCCGAC  
ACTCTGGCCCCAGGACGTTCCGTTTCCGCAGGAGGAGGGGAAGGAGGAGGTGGGATC  
GACGTTCCGGCGACACGGACACGCAGTCGGGCGCGTTTCAGCCCGGCGCCGGACGCCAA  
CTCGATCCAGTATCCCGCCTACTTCAAGGACCCGAAGGGCGGGAATCACGCGGTTTTT

GGTGCGGGTGGCACGGGCAGCTTCGGCGCCCTCCAGTACATCAAGCAGCAAGGCGGC  
AGCAAGAGCTGTCTGCCGGACGTGATACAGCACGGCCGCTCCGCGGGCATGCCGTTGT  
ACGTTCCGGTGGCCGATCTGTCTCAGAAGGAGTTCAAGCAAAAGTCCACGTTGCTGCAGC  
ACGGGTGCATACACATCGAGTCGCGGCCGTACCCTTGCCCCGAGTGCGGCAAGAGGTT  
CAGGCAACAGTCCCACCTTGACCCAACACCTTCGCATCCACACCAACGAGAAGCCGTA  
CGGGTGCCTGTACTGCGGCCGTAACTTCCGCCAGCGCACCATCTTGAATCAGCATCTG  
CGCATCCACACGGGCGAGAAGCCGTACAAGTGTCAACAGTGCGGCAAGGATTTCCGC  
CAGAAGGCGATACTGGACCAGCACACGCGCACCCACCAGGGCGATCGGCCCTTCTGC  
TGCCCCATGCCCAACTGTAGGCGACGCTTCGCCACCGAGCCCGAG

>novel\_circ\_001428

ACGTGAGTCCGCATCTAATCTTCAAGAATGGGATGACGCCGACACTCTGGCCCCAGGA  
CGTTCCGTTTCCGCAGGAGGAGGGGAAGGAGGAGGTGGGATCGACGTTCCGGCGACAC  
GGACACGCAGTCGGGCGCGTTCAGCCCGGCGCCGGACGCCAACTCGATCCAGTATCCC  
GCCTACTTCAAGGACCCGAAGGGCGGGAATCACGCGGTTTTTCGGTGCGGGTGGCACG  
GGCAGCTTTCGGCGCCCTCCAGTACATCAAGCAGCAAGGCGGCAGCAAGAGCTGTCTG  
CCGGACGTGATACAGCACGGCCGCTCCGCGGGCATGCCGTTGTACGTTCCGGTGCCCGA  
TCTGTCTCAGAAGGAGTTCAAGCAAAAGTCCACGTTGCTGCAGCACGGGTGCATACACAT  
CGAGTCGCGGCCGTACCCTTGCCCCGAGTGCGGCAAGAGGTTTCAGGCAACAGTCCCA  
CTTGACCCAACACCTTCGCATCCACACCAACGAGAAGCCGTACGGGTGCGTGTACTGC  
GGCCGTAACTTCCGCCAGCGCACCATCTTGAATCAGCATCTGCGCATCCACACGGGCG  
AGAAGCCGTACAAGTGTCAACAGTGCGGCAAGGATTTCCGCCAGAAGGCGATACTGG  
ACCAGCACACGCGCACCCACCAGGGCGATCGGCCCTTCTGCTGCCCCATGCCCAACTG  
TAGGCGACGCTTCGCCACCGAGCCCGAGGTGAAGAAGCACATCGACAACCACATGAA  
TCCGCACGCGGCCAAGGTGCGCAGGAACTCGAGCAGCGACTCCAAGCCGCCCGGCAC  
GCCGGCCGGTCTTGCCCCCGTCCCCGTCCCCAGGGGGTTGACGCCGACCGTGGTCAA  
GCCGGAGCTCTACTTCCCCCAATGTTACGCGCCCGCGTTTAATCACCAACCCCCGGTGT  
CGACGGCGCAGTTCCCGGCACAGGCGAACGGGGTGTCCGTCGCCGGCGAGTTCAAAC  
CACCGACCGGCCTGCCGCCGAGTGACTAACCGTCCATCCTGCCGCCTACTAGCAAGC  
AGGAATACCGCTGAGGTTTCAGCGATGCTTCGGTCACGCGTTACAGAGCGACGCCGCC  
GCCGCCGCCGCCGAGCAGCAGCAGCAGTGAACGCCGCAACGACGTCGTCCAGTGCC  
GCGACGCACCGATGCACCCAGCCGATCCAGCAACACTACCCGTGACATTTATCGTGCA  
TTTACTAGCCTCTTTCTTTTCGTTTCAAG

>novel\_circ\_001429

ATGAAAATTTAAAACAGATACAAATATATATAGATGATGAAATAAAACAAAAATATATAA  
AAAAAATTGCAGAAGAAAAAGAACAATAGGACGGTCTCTATTGACAGCTTTAACTTT  
TATACACCTAGTTAAAAATCAATCTTTAGTTAAACAATAATTTAAATAATTAATTGTACA  
TAAAATTT

>novel\_circ\_001431

CATCCCTGGCAAGTGAGCAGAGACGGCCAGAAGATCATTGGCCACATGGTATTGCGAA  
AGCAGTCCGGATCCGGGAGCAGTAGTAGCATACTCGGGTTGAAAGTGGTCGGCGGCA  
AACTGTTGGAGGATGGCTCTATGGGCGCCGTATCGAGAAGGTGAAGAAGGGCAGCA

CGGCCGACATAGAAGGTCAACTCAGACCCGGTGACGAGGTGATCAAGTGGAACGGCA  
GATCCCTTCAGGGCAAGAGTTTCGGCGAGGTTTACGACATCATCGCCGAGTCGAGGCA  
GGATCCCCAAGTGGAGCTGGTAGTCTCGCGGAATATATCGTCGACCGCGGGTCCCATG  
GCTACGGGGGGGCTATGACCGGGGGGCCGATGGCGGTGAGGAAGACCGCGCAGACC  
CAGTGGAGGCCAAAAGCACCCGGAGACGATATCCGGCCCGCAGCATCACAAAG

>novel\_circ\_001432

CATAAGTTAAAGTTCTCACAAGAGATAAAGTAAAGAAATTCATTACATTTACACATAC  
TGGAGAACAACTGCAATATATTGTTTAGCACAAAATGATTGGAAGCTAGACTTGGA  
AGTGATAATTATTTTCAAATCCTGAGGCATATTGTAAAGAACCAAAAAATACAGTAGA  
TAAAAAGAACTAGAAATATTATTTAGTCGATATCAAGATCCAAACGAGCCTGATAAGA  
TTACAGCAGATGGAATAATGAAATTTTGGATGATTTGGATTTAAGCCCTGAAAGCAAA  
TTAGTATTAATAATTGCATGGAAATTTAGAGCAGAAACACAATGTGAATTTACTAAAGAT  
GAATTTATGAATGGAATGACAGATCTAGGTGTTGACAGTATAGATAAATTAAGCTTG  
TTTAAGTAGTTTAGAAAATGAATTGAGAGATCCTCAAAAATTTAAAGACTTTTATCAGT  
TTACATTTAATTATGCAAAAATCCAGGACAAAAGGGTTTAGATCTTGATATGGCTATTG  
CTTATTGGAACATTGTATTAGATGATAAATTTAAGTTCCTGCCTTTATGGTGCCAATTTT  
ACAG

>novel\_circ\_001433

ATGGAATACGGGAAGGATCTACGATTCAGCGAGCAGTGGGACCGTTTGCAGAAGGAG  
TTCACCTGCTGCGGCGTGACCGGCCCTAAGGATTCGGTAGCCGATGGCCGCTCACCT  
GTTGCGGGCCGTCCGGCAACGTTAGCGACAGTTGTCAACCGTACGCGAGGGGATGCG  
AGGAGTCGTTGATAAAATGGCTACGGAAGACCGCCGACTTGCTGTTCTGCTTTGGGCTT  
CTGCGTGATAGCGTTCGCCAAATTGTGTTTCCCTCGGTATACTGCGTTACGAGATAAGGG  
AGATGATACAGAAGATACGATTGTAAAGGAGCCACCGCCTCCGGCGACCACCTCGC  
GCAACCACCATCTCCCAAGTGATACCGGAAGCGACCAACAACGGGAGCATCGTTTCGA  
CGCACCACTCTGCCTAACGCTGTCACCCCTCCGGAAACGCATCGTTGTTGATTCAAAC  
GGAGGAATGCAACACCGGAAGGCATCCTTTGTTGGCGAACAATTTGCAGGATGGCGG  
GGCGGACAGCGACACGAACAGTCATTGCGCGCTGATCCTCGAGGAAACAACGCCTAC  
CTCGGCGAACCATAATTGCGGTAACAGAGAGAAAAGCAATGGCAACAACAATTACGA  
AATGCGAGAATTCAACAGGAGGCTGTGGTTGTCGAACGGTGGCAGCCCGGGCACGGG  
TATAACAGCCGGTGGTCAAAGCAGGCGCACCTGACTATGGAAGTGGTGGCGAAACAC  
GTCGAACCGTCTCCTCTACAGGAGCAATCGGTCTGCCGAGATCACCGTGTATAA

>novel\_circ\_001434

GAGGTTACAACCATTTACGCAGTCCCGTGTGCCAAGACGAGAATCAGAGGGATGAAA  
CCTCGCCGCCACCCACAGCCATAACACTCAAGCGCCCAACTCTCATTCCACTACTCC  
GAATAGCAACAATAACAATAACAATAACAACAACGCGAACAACGCGTATATACATCTGC  
GGAAGTTGAATCAGCTCAAAACGGAGTCGAACTACAGCAATCACCATATAACGGAGCA  
CCTCCAAGGGGGTGGGGCAGGTTTGACGAGCGGCAACGATCTCGCGGGCACGGGGAC  
CAACGAGAGCGACTTAAGGGTTAGCCAAGCCGCCACGGAGAGCTACATGACCCCGGC  
GAATTATTCCGGATACGATGAAGCGTCCGAGTATCACAGCCTGCCGCAGGATCATCAAC  
CGCCGCACCCCTTCAATCTCGACGGCTCGCCGGAATTTTACAGCACCAAGCGGAATTCAT

CTCGAGCCCAAGTATCAGCAGTCGCCTTTCAAAAATTATCCTCGAG

>novel\_circ\_001435

ATGTCGACGCGGCGAAGGCCTCTCTGGAGAACGTGGCGGGCAACATGTACGAAAGCG  
TATGCGTGCCAGATTTAGGTGATTTCTTGGGATACCAGAGCGGCGGCGGCGGCGGCGG  
CGGCGGTCATCAGGTGCGGACGCCGGAACACAAGAGTCCAGCGACGCCAGCGAGTTC  
CGCAACTTCGAACTCGTCGGGCCCCGAAAACGGCGGAAACCAAGCGGGGGCCCCGTT  
GCAACCACCCTCCGCCTCGGTCTCTCTGCCCTCGAGACAGTATCATAACGATG

>novel\_circ\_001436

ATATACCGGCACAAGTGCCGCCGTTAACACCTGGGACCAACAAGAAGATGACCGAGG  
CCCTGGAGGCCTCTTTTCGCCTCCTGGGAGAAGGAACGAGTCCGCCTCAACATAACCAA  
AGATCCGAGGCAATGGTCGGAAGCAGCTGTCGCTCACTGGTTGCACTGGGCCATCGGC  
GAGTTCTCCCTCGCTGGTGTAGCGATAACAACCTGGCAGAACATGACCGGGAAACAGA  
TTTGTGCCATGGGGAAGGAATCCTTTTTTGGCACGTGCTCCGGCCTTCATGGGCGATATC  
CTGTGGGAACACCTCGAGATACTTCAAAAAG

>novel\_circ\_001437

CGGGATGCTAGAGGCGTGGGCAGTTATCTGGGAGGCGGCAGCATTAGCGACGGTGGC  
GGCATGTTGACGGGTATGGCGAAGTTGATGAAACAAGAGCTGGCCTCTGACGCCGAG  
GAAGAGGGCCTGGTGCCTGCCCTCTCCGGCAGGTTACCTCGATGCGGAAAGTGCCCT  
CTCTCTCCGACCTATCCGATCCAGAGAGCTCCTTGG

>novel\_circ\_001438

GCAAAATGGATATGGAATCCCTGTACGACTACGGGGAGGAGGAACAGGATTTCTACGA  
GGAGAGTCCTGGTACCAGGAAAGGTTACCCGATCGATCACAGATCCATCAAGGTCAGT  
GATACTCTCTGATCGTTCATTCAAGCGAGGCAAAGACGGAAGGAAGAACTATCGTCGC  
TAAATTTAATCGCACACGATCCACAGCGTTATTTCGTCGAAAGAGATCATCCCGTAGGAA  
TCGTAAACGAGTTATCCGAAAAGGAAGGAAGGAAGGAGCGTCGGTAGCAGCGGAAA  
GGAAGAGTAGTAATCCTTCGAAAGCGAAAGGGACGTGGAAGAGACGGAAAGTTCGCG  
GGATGCTAGAGGCGTGGGCAGTTATCTGGGAGGCGGCAGCATTAGCGACGGTGGCGG  
CATGTTGACGGGTATGGCGAAGTTGATGAAACAAGAGCTGGCCTCTGACGCCGAGGA  
AGAGGGCCTGGTGCCTGCCCTCTCCGGCAGGTTACCTCGATGCGGAAAGTGCCCTCT  
CTCTCCGACCTATCCGATCCAGAGAGCTCCTTGG

>novel\_circ\_001439

GCAAAATGGATATGGAATCCCTGTACGACTACGGGGAGGAGGAACAGGATTTCTACGA  
GGAGAGTCCTGGTACCAGGAAAGGTTACCCGATCGATCACAGATCCATCAAGGTCAGT  
GATACTCTCTGATCGTTCATTCAAGCGAGGCAAAGACGGAAGGAAGAACTATCGTCGC  
TAAATTTAATCGCACACGATCCACAGCGTTATTTCGTCGAAAGAGATCATCCCGTAGGAA  
TCGTAAACGAGTTATCCGAAAAGGAAGGAAGGAAGGAGCGTCGGTAGCAGCGGAAA  
GGAAGAGTAGTAATCCTTCGAAAGCGAAAGGGACGTGGAAGAGACGGAAAGTTCG

>novel\_circ\_001440

ATCGCGGTGTCAGATGCTCGCGTGGTGTACATCGAGGAACGCGAAGATGTAGCTCGAT  
CGACCGTCGCCATCGCGTGATCATCAAGAATCGAATACCACCGCGGTAACAGTGGACA  
TACTTATCTATAATTAACCTATATAATGCTGACAGTGTACCCCGAACGTGAACATTTACTC  
TCGCGTTGAATACCAGTTGACCAGTTTGAATCTCTGCAAAGAGCAAACAACGATCTAC  
CTCGTATTCGACGCCTGCTAAAATAATACTCGGCTTTCGAACGTTGGAAGAAAGGATCG  
GTCGTTGAAAAAAAAAAAAAGAAAGAAAGAAAGAAAAAAAAAGAGAAAGGAAA  
AGAGAAAGAAGAGGAATAATAAGAAGGAATCGGAGGATGGGGGGACACGCGGAGGG  
AGCGAGGATCGCGTGGTCAGTGGCACGGCTTCCGTCGTGGCCGTGGAGAACGAGATT  
CTTAGGCCAGCTGGCCTGAGATATGCCAGCAGCAACAGACCTCGTAATCACGGAACAA  
TCGAGAACGATATCATCTCGTCATCGTCATCCTCCTCCTCATCGTCATCGAGAACGGA  
AACGGCGGTATCGAGGTGTTCTGGGGGTGTCGCTGGCCGACAGCTGGCGGTAGAGATC  
GAGACGATCGAGCGCCGGGTCTGCGCGACCCGACGCGACCTCTTCGTGCCCCTGACC  
GTCGACCCCTCGGCCCAGCCGGGCCGTCCACTGTCCCGATCTAAACGCCTGTTTGGTGA  
ACGAGTCCCGATCTGGCCACGACCAGGTGCGACTGCCAGGCGATTCACTTCGGTTACGC  
GATCCCCGTGAACGTGGTCCCCCTGGGAACCGATCCACGGCTCGCCGAGCTCGTCTTG  
GACCACTCGACCGAGTTGAGCAGACGTGCGGCGAGCTTCCTGCTTGAGCACCATCCCC  
AGCTGCGCCAGCAGCGGCAGACGCAGCAGGAACGTTGTCCAAGCATGGCGGCAACCG  
CGAAGCACGATCTGCGACAGAAATTCGCGACGACACCTCGACGTCCGGTGACGAGG  
ACATCGCGGCGATCGCGAAACAGATCAGCGACCACGCGGAGGCCATCTATCAGACTTG  
GAAGAGTCGTGGGCTAGCCCCCTACCGAGATATTGAACTGCCACAGCAATGCCACGGCA  
GCGGACAAGTTCGGAAGCGCTCTCACGCCGAGCTCCGCGAATTTCGAGCAGCGCCAAC  
AGTACTGGGAAAAGTTCGCCGACGAGCGGCACACCGGCCACGGCGGCGGTTGATATA  
CTGAGCCAAACGCCGAATCTCGATAACGGAATTTGGAGAAGCTGGTGAACAATTTCTG  
TGGTGGAGGACAAAGCTAGGTTAGCCGCGTCGAGGCAGAGGTCGCCGTCCAAGACTC  
TACCCTCGTCGATACAGTTTCGCGCTAGAGAAGTTTCGAGAAGAACTCGATGCAGCAACA  
GCAGCAACAATCGCAGACCTCTCCGTTGAAGAGCGGTAACGTCGGTGGCAGCGGTCA  
GGGGAAGGCGAAGCAAGCGACTATCCTCCTGTCCCCGACTTCCCCGTTACGAACAA  
ACCTTCGCAGATAGTGAAGCCTCAGGTTTCCCCGAAAACGCCGGGCGCGCATCATCGG  
GAAGTGTTTTTGGAACTATAGAGACCACCTTTCCCGCGGATATCACGCCGTGAAGAT  
CGTGGTGCAGCAAAAGAGGCCAACGAGTACGGTCATCACCTCTCCCACCGCTTCCTCC  
AACCTCGACGATTCTTCCACGAATTCAGGTTTGACCACTTGGCCCCTGAAGAACAAGT  
TGAACGACAATAAAAGAATAACGGATCCTTGTAGATCCTCGCCGCAACAGGAGGGCAA  
ATCGTTGACGAGCAAGGAGGAAAAGAGGAACAGCGGTTCCAATTTCGAGCGCGTACCT  
GGACGAGGTTGCACGCGAGGAGGAAAGACTGATAAACGCCCTGAAGACGGGCTCGGT  
GATCACGGAGGAGCCCCTGGAGAGGACGGTGCCCCCTCACTCGTCAGAAACCCGCGAT  
CAAGAGGGAGAAACCGAAGGTGGAGCCCCTTAAACCGATAATCATCGGCCACAATCAT  
CATGGAGGGGGCCTGGTCCCCGCTTCCGCCACCATGGTGAACAACGTGACGTCCATCG  
GGACACAGGGAACCAATCCCGGTGCGACGTCAGACGCGAAATCTCTGAGCAAGGATG  
ATCTGTCCAACATGTCGGTGGTGGATTACGCGAAAGTGAGATACAGAGCGGCTCAGCA  
AAATCCTCCGACTCAGCAGAGGTTGGAGGAGCAGAGAACGAACAACAACAGTTTCAA  
TTCCACGGAGCAGTTAGTGTCTACCACGAGGTCTAAATTTCGAAACGGAGATACAAAAG  
GACAAGGAAGCGGGTAAAGAGGAAAAGGATCCTGTCACGTCTAGATGGGGCCCTAGA  
ATCAATTTCGCTAGGCCAAGAATCGAGCAAGTACCTCATCCGGAATTGACCACCCAAC  
AGAAGCAGCATATCAGAGCTGCCGCCGCGACTGGAACCGGGAACAATCCTATCAGACC

GTTTTTAACCAGGGGATCGGTGCGCGAACGCGTTTTTGATCTTCGAGAAGTGCCCGAGT  
GAGCTGTTGCTCGACAAACGAGGGCCACGTCAACCGGCCATCAAACTTGGAGAACG  
GGACACGAGGTTCAAAACAAGGCTCAG

>novel\_circ\_001441

AAATGGACGATCCACCGCGGAATACGTCTGGAAAGAACCAAGCTGTGCCAGGAAGC  
CAAGGCACTGACGCCAAAGCCCCATCCGACTCGGAAAACGCCCCCTCAGGTTCAAGGC  
TCGTGTAGCAACTGTGGCGTTGCTTGTATAGTGTTCGTGCGACGCCAAAAGGACACG  
CGTGTACAGCTGCTATCTGCACTGGAG

>novel\_circ\_001442

CCTCGGACCTGGACTGCATAAGGGCGCTGTTCAACGAGAAGGAGAAGGAGCTCTCGT  
TGGCGGTGGCGAAGGTGGAGGAGTTGACGCGACAACCTCGAGGAGTTGCGGGGACAGG  
CAGAACGCGGCCGGGACCGGAAGCGGAGGTGGAGGCGCCGGAGGCGTCGGCGGCGG  
AGGCGTTGGAGGCGGCGGCGGCGGTGGACACTTGTGACGCCAGCCAGCGCCGAGCT  
CGAGAACTCAGGAGGGAGCTTATTTATCGTAACAAGATGAACGAGCAGCAGAACCA  
AATGGTGTCTCAGCAACGGTTGGCCCTAGCGCAACGGCAAGCGGAGATGGCGTTCGATT  
GACGCGAGGATAGCTCAGCTGCAGGGTCGCCCTTCAACGCAAGAGAGCGTTGAACCAA  
CGGCTGAGCCAGCAGCTAGGCTCTGGGAATCGCACGAGCGCGAGCACCGGGTTCACA  
GAGTCGAAGCTGGACTTCAATGGCGGGGGGAAGTCGAGGCCTGCTGGAAATATAGCC  
GCTATCGAACCCTATTCCCATATACCGAACGACAACGATTTCAATTTGAACAAGAACGA  
CCCGAAATACCAGACACTGCCTTACAACACCAAATTCACGGTGAATTTCAAGGCTGCC  
GAAGACGACGTTAATAAGAATAAGATACAACACTCGGCCAGTGCATCCCAATTAGGTC  
AGAGGGCAGCTTTTCAACAGTTTGGTCATCAATCGCCACAGCCAATCCCAATCTCAT  
ATTCAAGGTCAATCCCAATTACTGGGCACGAATCAACACAATCAGAATCTGCCTAATCA  
ATCCGTCAACATGCAACAGACTTGCAACAACAACAATAACAACAACAATAA  
CAATAACAACAGTAATAACAACAACAACAACGCCAATAGCACGAACAACAACCTGATT  
AGCACATCCCACTTTCAGCCCCGAAGGTTTGTGCAAAATCTTCGGATCCATCATCA  
ACAGCAATCGCAGTCGCAGACGCAACAGCAGCAGCAGCAACAACAACAGCAACAGC  
AACAGCAACAACAACAACAACACGGAAGCATTCAACAGAAGCAACACAACGTTGGT  
TCGTGACATCGAATCTCGGCAGCACCGTATCCATCACTCAAACACAAAATCACAGAA  
ACCTTCAAACGCATCAGAAACCAATATCCAGCGTGGCGCCAAGTTTCTCCGTCAAGTC  
TCAAATCTATCAGACTTCCTCCACCAAGATTCATCCCGTGATGCCGCAAACCTTGAGCC  
TGATAGGCCGTGGACACAATAACGCGCAAAATTTCTGTTGGTCTGAGCACTCAGGCAGG  
TGGGAATCAGCAACAATCGAATCAATCCTCTTCTAACAATCAAACGTCCACTCAGGAC  
CAGACGTACGCGTCGAGGCACAACCTATCCCGGTATTCAAACTCCGCCAAGCGAATA  
CTCACCTGTGTCTCATCTCGGTGTACCAGACGCAGAATTCTCCCAATCCTTCGTGCG  
ACCATTCACACGTCGTGAGCGGGACAGTTTTGGAAACTCGGTTCAAAGATACAATC  
AGGCTCAACCGTTAACCGGGCCCGCGTCCAACAACGAACAATCCGATAAGATAAAGTT  
TTCGGAAGGGAAGGTTCAAGAAAAATTCGAGCACGCCCTTCCGGCTAAACACGAACA  
GCAGAGGTACGAGGCCAATCAGGTGTTCAAGTACGATTCTCATCAGATAAAGTACGAG  
CAGCATTCCAAGTACGATCAACACGGGAAGTACGATCAGGCGAATCAACAACGAAG  
TTGTACGAACAATCGAGCGCGAAGCACGAACAAATTGGAAATCAGACGAATCGTTACG  
AATCGAAGATGGATCAAGGGAAGTACGAAAGCGGGCAGAACAAGCACGAACAATTC

ACGGAAC TAAGTACGATCCTAATCAGAATACTCAACAGTACGGTAAACACGATCAACA  
CGAGGTGAGGCCGTCGATCAAGTACGAGCACAATGCGGGATTTAAGCACGAAACGAG  
CTCGAACAAGTACGAGGGCGGGGGCCAGCAATTCAAGCAGGAATCGGTGAAATTCGA  
GGGGAACAAATTCGAGCAAAGTTCCGCGACGAAGCACGAGCACAATGGGAAATTTGA  
GATCCCCGCGAAAAC TGTGGAGAAAAGCTCGTTTCAATTCGATAGGTTGAAAAACGA  
GAACGAAAGGAAAAGTATGATAGAGGACAAGACGAAACCGGCGCTACCTCCGAAACC  
GAGCAAACCGAATCCCCCTCCGCGGCTGACCCATCACGAGAAGATGGACAATCCGGG  
CGACGGGATCGCCGATTGCAAGAACAATTTAGGGATCAATACGAG

>novel\_circ\_001443

TTACCAGTGGGCGGGGGTGGTGCTGTGCTGGTGCTCAGCGAGCTTGAAAGCATGGCA  
GCCAGGCAACAGCGGGAAATTGCCAGCAAAGGCGCCTCCTGGAGCAGAGAGAGGC  
CCGTCTAGCCGTGCTTCGAGGCGCACAGGAGCCAGCACAGCAGGACAAACTCGCCAG  
ATTGAGGCACAGGTTGGACCAACAACAAAGCAAAC TGAATCGGTTGCGATTACTCAG  
GTCGCAAACCGACCAGTCACGTGCCAACAACGCCACGCTGA

>novel\_circ\_001444

GTCG CAGGGGAGCCGCGAGGATGTGAGCAAGGATGCGCGCAGGAGTGCGTGAGATCA  
TCGTGATCGCCGGGAGATGGCCGCGACGAGCGTTTCAACGTGATCCCTGGAGGCAAG  
CGGAGGGGAACGCGCCGTCGAGCGATGCACTGAGGCCCGAGCAGCGAGGAGGACG  
ACACAAGGCAGCTAGGACGAGCGCAACGAGGCGAGGAAGGATGGAGGAGGTGCGAG  
GCTCCCCGGCGCGACGCCTCTCGCAGATCCTCGACCCGATCGCGCGCCTCGCCACCGA  
TTTCGGCTCCAACTCGGCCCCCTGCAGCCCCAGGCTGGGCGCGCGGGGTACGAGGC  
GAGCGGCGGCGGCACGATCCAAACGACGGGGCAGGCCGAGGTGGCGGCGCAGCGGC  
GACAGCCGGAGCCGAGTCGAGGCGGCGGGTGCTGCCAAGCGGCGCGGAGAGTCCT  
CGACTGTGGCCGAGGCAGCTCCGCCAAGCGCCGGCTCCGCCGCCCCGCCGAGGCAC  
GCCAGCAACGCGAACAACAACCACGCCGCGGCGATCCAGGGCCCTCCAGGAAC TCTT  
CCGCCTCCGGTGCACGGCAGGGACTCGCCCTACGTCAACGTGCCGAATTTGCTGTTTC  
AAAAGCAGGACAAGAAGGGGTTCGCGGAAGCCGCGAGAAGCGCGGGCTACGTGGAG  
CTCAGGGACGCGAAGCCAAAGTGCAGCCCGTACGATTTACGTTCGAGTCGAGCGGC  
CACGTGGAGTACGCGGACAAAGTACGGACGTTCCGCCGCGCAGACCGATTTCAAGCT  
TCCTCGGCCTGCTACGACGCCAAGGACCTGGCCGCGTTCGCAAGAGCCAGGTCCAATT  
TCGATCCCGGACCTGCGCCGCGCGGGGGACCC TTCGATCGGGCGTACTCGTTCTCGGG  
CAGGCAGCCGGACCAAACCGGAAGGATGTTCCGCCGAGGGCCGGGTGTACGGGGAGC  
AGAGGAACGTCGTGGGGGCCGAGCTGGTTCCGAGGCGGCCAAGAAGGAGAAGCTC  
GAGACCAGACCCGCTTACGGCGCGTCCAAGAGCTTCGATGGATACTCGAGCGCCGTGG  
AGGAGCTTAATTGGCAGGAAAGGTGCCTCGAGTTGCAACTCGAGCTGCACAGAAGTA  
GAAGCCAGGCGACCAGGGTGCGAGATATGCTTCGAGAGAAG

>novel\_circ\_001445

GTACGGATGATGGAGGAGCGGCTAGTGAAGGGTGAATATTGCTTGAGCACATCCGGCG  
TTGGTTCTCCACCGCATTCGCTGCCGTCTACTTCCGGTACGCAGAATGACAAGATCGAG  
GATGTCCATTGTGCTTGTATCTCGAAGCTAGAGACACAGGTCGAGGAGCAGAGGCAGT  
TGCGGCTTCAAGACGCGAGGCAGGTCGAGGCGAAAGCCGCGAGAATAAAGGAATGG



GTGACCAATAAGCTGAGGGAATTGGAACAGCAAAACCAGCATCTGAGGGAACAGAAC  
AACAAAGTGTAACCAACAGCTGGAATTACTGAGAAATCACATAACCAACATCGGCCTGA  
AACCGCCTGCCCCACGAGAGCGTCCCTATCCCTGGAAGTAGACCCGACGTTGCGCAG  
ACGATCGGAAAGCTTGGAGGGAACGCCACAAGCTATACCGGAAAGCGTGCAGAGCTC  
TGTAGCGGAACCACAAGCCGGCACCAAGCACCGAAGACACCTGTCCGCTTGCGGAAC  
TATACAACGAGGAATCACAAACCACCAATATGGACTCAAG

>novel\_circ\_001446

AACATGCTCGCAGAACAGACATAGCGGATGATTCTACCTTCAGCTCCAGACGCCGGTT  
CTGAGTGAGCTAACCTTCACAGAGTGAGGGTACCTCTTATCTGTTTGATCATTGTTTAT  
CGAGCCTGAAGCAGTGCTACAAATTGACAGAACGATGAAGTGGCTCGGTGCGAGTAG  
CGCTGGTGCTGCGGGTGAACCGGCACCTTCTATGCAATTACACCACCCTTCCGCAAAT  
GGACATATACCTACGGATGCAGAGCAATGTGGTCAAGTAATGGCTGGTGGTGACAGTAT  
GCGTATACAACCTGGTCAAACGCATCAAATAGGTGTGAACAGAACTCAAGATGATGCT  
ATGGTGGGTATGTATTTCAACGACCAACAGAAGCAGAATTTAATGCTCAATCTTCAAC  
ATTTCAAACAAAACAAGCACCCCGTGCTTGGGCTCTTGCAGATGATGCTATTATCGATA  
ATAATCCAGAAAAATGGAAATATCCATTACTAAACTGAGTGTACCACAACAGAATCAA  
CCTCAACAATTAGGTCTACAACTATGAACAATGTTTCATCTACCTTATGAAATCCATCCA  
ATGCAACTTAAAAGTGGAGCACCAGGAACAGAACATTTAGTTTATCTTAATAATCAAAT  
GACAGCACAACAACAAGTTGCTCTCTTTCATCATCAACAACAACAACAACAACA  
GTTTCAGGAATGGCCAGATCGCTCCCTCGGCAAAAAGCTTTGGGGCGTGACGAGGG  
CGGCTCCAAGGACGAAGGGGGTGTAAGGTGGTGGGATACTTCACCTGGGCGACCA  
CCAGATGTGGCGAGACTCCACCTGGAGCACCTCAG

>novel\_circ\_001447

CTCCAGACGCCGGTTCTGAGTGAGCTAACCTTCACAGAGTGAGGGTACCTCTTATCTG  
TTTGATCATTGTTTCATCGAGCCTGAAGCAGTGCTACAAATTGACAGAACGATGAAGTG  
GCTCGGTGCGAGTAGCGCTGGTGCTGCGGGTGAACCGGCACCTTCTATGCAATTACAC  
CACCTTCCGCAAATGGACATATACCTACGGATGCAGAGCAATGTGGTCAAGTAATGGC  
TGGTGGTGACAGTATGCGTATACAACCTGGTCAAACGCATCAAATAGGTGTGAACAGA  
ACTCAAGATGATGCTATGGTGGGTATGTATTTCAACGACCAACAGAAGCAGAATTTAA  
TGCTCAATCTTCAACATTTCAAACAAAACAAGCACCCCGTGCTTGGGCTCTTGCAGAT  
GATGCTATTATCGATAATAATCCAGAAAAATGGAAATATCCATTACTAAACTGAGTGTA  
CCACAACAGAATCAACCTCAACAATTAGGTCTACAACTATGAACAATGTTTCATCTACC  
TTATGAAATCCATCCAATGCAACTTAAAAGTGGAGCACCAGGAACAGAACATTTAGTTT  
ATCTTAATAATCAAATGACAGCACAACAACAAGTTGCTCTCTTTCATCATCAACAACA  
CAACAACAACAACAGTTCAGGAATGGCCAGATCGCTCCCTCGGCAAAAAGCTTTGG  
GGCGTGACGAGGGCGGCTCCAAGGACGAAGGGGGTGTAAGGTGGTGGGATACTT  
CACCTGGGCGACCACCAGATGTGGCGAGACTCCACCTGGAGCACCTCAGATCATGCCG  
TCTCACAACCAATTTCCATGGGTACAGGTAGACGTGTGGGTGTGCGAACTGGATACCAT  
CATCAAACATCAGAAGTTGGAACAGTTCTTAGCCCTAGAAGCAGTGAAACGGGTGGTC  
TGGGGGTAAAATGGTCGAATATGTTCTTGGATCAAGTCCTACGACACCCAAAGATTTG  
GAGCCCAGAATGGTTTCCCTGAGATTGAATACTGATGCAGACAAGAAAGAAAAAGAG  
AAGGGCTCGGCAAGCCCATTTGACAGTTCTAAAGACGATACAGGTCCACAAAATAACG

GATTAGCATCCCAGAATGGTCTTGATGATGATAAAGGATTTAATCGTACACCTGGGAGT  
CGCCAACCTTCTCCAGGCGAGGAGGAATTTCAGAAGAACGCGGCTGCTACACTGGCT  
GTGAGCGCCGGTGGTGGCGGGGTGGTACTGTTGAAGCCTGGTGTGCGATGTGGTTCGGA  
AGCGAGGAACATTTTCATGGCCGCCTTTGCCCCAGCTCCGCCGCATCATCTTCAACATCA  
TCAAGCACCACCGACGCATCATCTCCAACATCCACACTCGCACGCGGCGCAACTCTTT  
GGTGCACAGGCTCCGCCACCCCCACAGGGCCCTCCGCCTTCCCAGCAGCAACAACAG  
CAACAGGGACCCCCGCAGCCGCAAGACACCACTACTCACTTTGATGTTTCAG

>novel\_circ\_001448

ATCATGCCGTCTCACAAACCAATTTCCATGGGTACAGGTAGACGTGTGGGTGTCGGAAC  
TGGATACCATCATCAAACATCAGAAGTTGGAACAGTTCTTAGCCCTAGAAGCAGTGAA  
ACGGGTGGTCTGGGGGTAAAAATGGTCGAATATGTTCTTGGATCAAGTCCTACGACACC  
CAAAGATTTGGAGCCCAGAATGGTTTCCCTGAGATTGAATACTGATGCAGACAAGAAA  
GAAAAAGAGAAGGGCTCGGCAAGCCCATTTGACAGTTCTAAAGACGATACAGGTCCA  
CAAATAACGGATTAGCATCCCAGAATGGTCTTGATGATGATAAAGGATTTAATCGTAC  
ACCTGGGAGTCGCCAACCTTCTCCAGGCGAGGAGGAATTTCAGAAGAACGCGGCTGC  
TACACTGGCTGTGAGCGCCGGTGGTGGCGGGGTGGTACTGTTGAAGCCTGGTGTGCGAT  
GTGGTTCGGAAGCGAGGAACATTTTCATGGCCGCCTTTGCCCCAGCTCCGCCGCATCATC  
TTCAACATCATCAAGCACCACCGACGCATCATCTCCAACATCCACACTCGCACGCGGC  
GCAACTCTTTGGTGCACAGGCTCCGCCACCCCCACAGGGCCCTCCGCCTTCCCAGCAG  
CAACAACAGCAACAGGGACCCCCGCAGCCGCAAGACACCACTACTCACTTTGATGTT  
CAG

>novel\_circ\_001449

GTTTAGGCCTTGGCGCTTCTTCAACTGCGCGAAGAGATTTCCTTCGATAGAAATACATCT  
GCTTTCAGTCCTAGTTTAGAATACAGCCGCGCCAAGTGGCCGCAGAGTTACGGAGCTT  
TAGGCACTGTAACAGCATCGCCAAGCCCGTTGGGATTATCCTTAACACCGCCACCGACT  
TTGGGAGGATCTTTAGGGGGGTGGTTCGGTGGGGCCAGCCGTGTATCAGCTGCCCCCG  
GCGCCGAGGCCAAATTCCGGGCTAGCGCGGTCCCAGCTTTGACAGCTAACGGGGTCTT  
CGGCTCTAGCAGCTCTCTTTTCCCGAATTTGGTTGGCAAACCTGGCCGCGGCGGCACG  
ACCAGCATCGGAGATAAAAATGCCGGTGGACGATCACGTTTGCTAGAGGACTTCAGGA  
ATAATCG

>novel\_circ\_001450

ATGTCCAGGTACCTCGGTCTGATTCTGCTCGTCGTCACAACGTGCGCCACGGAGCCA  
AAAAATGCGAGGGGAACGATCTGGGCTTGAAATACGTGTGGGGCGATGCGCTCACGG  
ATCCAGCCGATTGTATAGGTCCAAATAACGTGCAGTATCCGTCAGCCGCAATATCGAGA  
AGTTACAAGAATCTTTGGACGAACAGCCGAATTGCGAGATCTCATCAGCCACGAACGA  
TCGATCCCGAATTAACGAGGCAGGCGCTATTGCACAATTACAAAATCACCCATGGAGAT  
TATTCGATGGCCGAATCCTCGCGAAATG

>novel\_circ\_001452

TTGATTTTCAGTGGCGAGTACACGAAGGCGATGAGCAAGGATTGGCACAGCGGCCACT  
TCTGTTGCTGGCAGTGCAGAGTCTTTGACCGGGCAACGCTACGTGCTGAGGGACG

AGCACCCCTTACTGCATCAAGTGCTACGAGAGCGTGTTTCGCGAATGGGTGCGAGGAGTG  
CAACAAAATCATCGGTATCGATTCCAAGGATTTGTCGTACAAGGATAAGCATTGGCACG  
AGGCCTGTTTCCTGTGCAACAGGTGCAGAGTGTCTTGGTGGACAAACAGTTCGGTAG  
CAAGGTGGACAAGATCTACTGCGGGAATTGTTACGACGCCCAATTCGCCAGCCGTTGC  
GATGGATGCGGCGAGATCTTCCGTGCCG

>novel\_circ\_001453

GTGTACAAAAACAACGAGCTGTTCTACTACATCGACGGTTATGACGTCCAGAAATCAA  
ATTGGATGCGTTACGTAAACCCGGCTTATTCGTCCGAATCGCAGAACCTAATAGCATGC  
CAGTACAAGATGAACATATATTTTACACGATCAAGCCGATACTACCGAATCAAGAGCT  
TCTGGTGTGGTATTGCAGGGAGTTCGCGGAAAGGCTCAATTACCCGTTGACGGGTGAA  
CTAATGCTTCAAAGAATAC

>novel\_circ\_001454

AGGTGTGTTTCGTGAGAATCAAGGACAAGAATCTTCACGTGGAGTGTTTCAAATGCTCC  
ACTTGCGGCACTTCCTTGAAAAACGTCGGCTACTATAATATCAACAACAAATTGTATTG  
CGACATACACGCGAAATTGGTCGCCAGGCAAAATGCACCTGCTGGCATGGTTCCAATC  
ACTATACCACCGGGCGGTAATAAGGCTCCCGCGAGCACCATTTCCGCCGCTCTCGCGCA  
TGCTCCGTTATCCCCACCCTTGAGCAATCACGCATCGTCGCCCCAACCATTCTCCGCTT  
GCAATCGTTCGAGTCCCGATTACTTCGGATCCCCGAATTCTCAACTATCGCCCCCTCGATA  
AGAACGGATACATCAGCAACGGCAACTGCAACTGGGAATCGAAAACGTTTACGAGCA  
CGATCACCATTTCAGACGGGTTCACAGAGCCCACCCGCCTTGCGACTACGCCCCGTCGA  
TCCACCCAGTTTCCGATCAGTCCAGGCTCCAACGTCGAACAATTTAATCGGTCTTAAAC  
CGTTTGGATCGTCCAATATATCGTCCCCTCCGCTAGCGAGCACAGGAGGTAGCACTCTG  
CCACGACCCCAGAGTCAGACAGTGACCG

>novel\_circ\_001456

GTGAATACCGGATCACCGGCGGAAGCGGCAGGTCTGAAGGCCGCGATGCAGTAATC  
AGGGTGAACAACACGGAGATGTACAATCTGAGGCACAAGGACGCGCAGGACATTATC  
GTGAGAGCCGGGAACAACCTTCGAGTTGACCGTACAGAGAGGTGGAGGCACCTGGAA  
ACCGCACGTGTCTCCGATAAGCTCTACCCTGCCCTCGCCGTCCCCACCAGCGGATTG  
AGCAACATAGCTCCAGTTACGAAAACATCGTTGGCCGCCAAGAAACAGGATGGGCCG  
CTCATAGGGAGCGGTACAAATTCAGCCCGAAACCATTCTTAACGGGACGGGGGACG  
GGTCGATCAAATCGATCGTTAACAACAGTACAACAGCCCAGTGGGTATATACAGCGA  
GGAGACTATCGCGGAGACTCTTTCCGCCCAAGCGGAAGTTCTAGCCGGCGGTGTGCTC  
GGGGTGAATTTCAAGAAGAACGAGAAGAATTACAACGCGGAGAACAGCGAGGTATTC  
AAAATGGTTCAGGAAGCTGACAAAGAGCCAAAGACACCGGAACCCGCGGAGCCAAC  
TGCGCAGAGCGGCGTGATTACGCCGTGCTCGCCGGCCCTGGCAGGACTGAGGCCAGT  
CTCGGCGCCTGAAACGAAGCAGCACTCCCAACCGTCCACGCCGCAATCGAGCCTACC  
ACCTGGACAGAACGTTTGTGCCGAATGCGAGAGGCTCATCGT

>novel\_circ\_001458

TTCATCATGATTGTTCAAATTCGATTACTTTTTTTACTTTCCATTTTATTCACTGCTAGCTT  
TGCGAATTTTCAAGATGTTGCAAACAATAATGAAAGTTCTGGAAAGATATCGGCTATAC

TCAACAAATTGTTTCGACACGGCATTACCTTCAATTCAAATGTTTATTTTAAACATAAAT  
TAGATCCTATGAAATTGGATGATCTATCCCAAATCTGAAAGGAGTAATAATTCACCATA  
GAACTCTTAATTTAACAAACGGTTCTCTTCAAGGATTATCAAATGTAAGACGGGCAAAC  
GATATTATTTTGTCTTTTGAAAACAAAATTCTAACTCTAGATGCAACTCTAGGATTCGAC  
GATCTTAAG

>novel\_circ\_001459

AAAGAAATGATGGACAATGAAGACAAGATAGGAAAAAATAAAAGAAATAAAGAAGA  
CGATGCTAATTCTCTTTGTGTATGGGAAAACCGAGCGGGGTCCGTTGAACAAACTAGG  
AGGCAACCCGCCAGACTTTCGAATAAGCTATTCAACCAGTGCAATATACCGTGCAAATA  
TAGCGCATCCCGTCTAGACGACGTTGCTTTTCCATCTGAACGAGAAGTTACCTCCTTAT  
TTCGTGATTTTCCATGGAAAACCTTGCGGAAGAAATAGGAGAAGCAATAGCAAAACAG  
TTGAAGTCGAATCGATTTCGAGATCATCGATCTTGCCCAATCGTTTTCGCTCGTTAAACA  
ACGATAGTGTCTTGTTCAATTGATAACAAGTGAAAGTTTTCTTTTATTATAGTCAATAA  
ATATTAATGCCTCTTTTTTTTTTCTTACTTCTATCAATTTAATCTATCAATAATTTAAAAAG  
TATATATTTAATAATCTGATTTGATTAAAATTGTATTCAAACTAGCTATCTAGTTATTTCT  
TCAATGTTCAATATATGTAATTCAAAGCTGAACAACCGCGAGAACTGGTGCAAACCTC  
AACTCGAATGACTTTATCTCGGCATACGTACACACAATACTCTTTATG

>novel\_circ\_001461

ATCGCAATGAAGGAGACGTTGACGAAGCAAGAGATCAAACGCGAATGGGAGGAAAA  
CAGCGTGGACGAAGGTTCACCCAGGATGGCCATGGTTGGGACAAATCCAGATGAACA  
ATCCGTCGAGAGTCCCCGGACGGTGATCACAGCGAGAAGGCACGTGCGCACCATCAC  
CACGGCTGGTCATATAACCGAGATGGTGGTTGATCCGGAACCAGACTCACCCGATAATC  
TCCAATCGCAGCGGCAACAGCAACATCATCGATCGATGGATGAACAGCAAACCTCGATC  
GCGCACGTTTCAAGAAGAGCAACAGCAAGATCAAGCATGTAAACAAAATTCGCAGAC  
CTACGTGCAAATTTCTCACACCGAAACGGAAATTCAACAACAGGATCGTTCTCGAGAG  
CAACGTATAGTTTATTTAACGAGCAATGGGCAAGAAGTGCGAGTCGTAGCAGAAGCGG  
TAGATCCATCTACATTGACGGTGAAAGAGACCGTTAGGTATGAGACGTCAGAATCCGAT  
GGGACAGAAGCGGATCGCATATACGTTATCCGGCGGATGGCCAACAACAATTGCAAA  
GAGAGAACCACGGGATCGCTGTTCAAGCGCAGGAAAGGCGAGTCGTTCAATCAGCCA  
ATCATCAAAGATATAGTCCACGAGAACTAACCAATCCAGTGGCGGAAATGGGTCAAC  
CAGTAGATCCTATCATCAAGGCTCACCAGTCCTAGTTCCAACCTAGCGAGGAGTACGAG  
GGTGGCGCCCCCATAGTTTCTCATGCGGGGACAACCGTTAGCGTGCGACTCGATTGCG  
CTACAGCGCCCTCTTATTCTCCGCCAATGAACGACATCGGTATTCGAGCGAGTGCTGGA  
CTTCAACAATCAACTGGTCAGCATCATCAACTTGTCGCAGGATACGTGAACGCTGG  
AGGAGTAAATATCAAGTACGAAACACCGGAAACGTCAAACGCCGAGTGGTAGCAGC  
GGCTGCTGCTGCGATTCCAGTCGACAACATTAATAATATCGAACACGTACACTACTCTCG  
AAACGGTACCGATTCCCTCCCACGCAGGCTGTTCAGTATCCTCAGTATATATCCGGTAGT  
GAGACGTTTCAGCAAGCTCCAACCTTATACGTATACAAAACCAGGGGAACAAGTGATTC  
TGACGTATCCGTCACCAGTTCAATTGCCTTCGCGCGTTCTGAGTAGAATCAGGGAG  
CACATATATGAAAGGTGATCCAACGTTAGCATCTTCGTTGGGAAGTACGCGTGAGTAG  
CATCTCTGCATTACGAACAACCGAGATCTCCAGGATCTCAAATGGCGTACGGAAGCGG  
GACTAGTACGTATCCATATGCCAAAGCGACTCCTACAGCCGATTATTGGTTCGACCGCAG

GAACTCCATCTCCACCTACGTTTCGATTGCGTCCAGGGATACCAAACGGCAATTTCCGTC  
GGCGATAGTAACATACTCTATTCTGGCGGTGTATACAGTGTCTCAACTGGAAACACTAC  
GTCTTCATGGTCTAACAATCTGTCACTATCCAATACCGAGGAGCATTTTCGAGGGTTCGA  
TCATGACTGTGGATCCTAAAGAGTGTCTAATTGCGCAATTTTAACTAATGTATTAAGGA  
GGGACGAAACTGGGAATTACGTGTGTCAAAATTGTATCTATGCAGCAAACAAGATAAA  
CGGTATAAATAGATCATCCATTAAATGCGGCAAACCGAAGCAAGCTGTCCGACGGCG  
GGTGTTCGAAGAACCGGTGTTCAATGCGCGAATTGCAGGACAAGCAATACGACTCTGT  
GGCGACGAAATAACAACGGCGAGCCAGTGTGTAATGCATGCGGTCTCTACTACAAATT  
ACACAAC

>novel\_circ\_001462

TTCGTTATATCGTTCGATAAGCGATGTCAGTAGTATGACGGCGGCCAGCGCGGCAGGAA  
CAGGAGGTACTTACGGCCTTCCTTACATGACCGGCAGCCCAACAGAATTGACCGCCTC  
GCCCCAGCAATTGTGGAACGCTCAAGGTCTGGGGACAGGACTTCCCGCCATCTCGGA  
GGATTACGGCGCTGGCAGCAAGTCGACAGGCACGGTGACGCATCAGGCGTTGCCAGG  
ATTTTCGCAACCGTTCTGCGGCAGGGCGAGCTTTCGAGGATACAGCCCGTCTTATCCGA  
CGCAGCAAAGCAACGCCGGGGTCGGGGCTGGGACTGTGGAGCCCTCGTCGTGGAATT  
ATGGCTCGCCTTCGAACGACACCCTGGCCACCCAATACGCCGCCCTTCGAGGCGGCA  
ACCCGTTAACCTCCGTGACACCCGCGCAGCATCAGCTCACAGCCACTGCTAGTCTT  
AGCGCGA

>novel\_circ\_001463

AATTGGCCGAATGCCAAGTGGACGAAATGACGGGCTACGAGAAAGGGACGGAGAGAT  
CCGTGAAACTGATCTCTGGCGAGAGCATCGAGGAAACGAACAACGACGGTGGATCGA  
TGGGATTGTTGGAGACGGACGGCGGGGACGTGGTACTTTTTTCGTCAGGAGACACAAC  
AACAGAAGCAACAACAACAACAACAACAACAACAACAACAACAACAACAACAACAG  
CAACGGCAACGCCACCAACTTTACCAACTACCTTACGAAAAGCATGGAAGCGAAGAG  
GGCGGGGACATGGTGGGCGTGCTGGAGGCGGGACAACAGGAAATTGAAAATGGCGC  
GGTCGGCGAGGCGAGTGACGCCGAACCGGTAGAAATCCCCGTCTCACCGGAACAAGG  
AAACGACGTAGACGACGCTTACGGCGTGCACTCGCTCGGCTTTAACGCTCAGGACCCT  
CTGGTTCGAGAAAGGGGTTATCTCGATCAGGACTCGTACGGGGGCGGCGATTTAGGCG  
GCGATTCTCGAAGCAGGAGGAGCAGCAGTTGCAGCAACAGCAGCAACAGATCTCTC  
AACCTCTCCACCACCATCATCACCACAACAGCAGCGTCAGCAATCGCACCACCACCA  
CCATCACCACCACCAGCAGCAGCACCACCATCACCACCAACAGCATCAGCAGCA  
GCAGCACTACCACCGCCATCAGCACAGCGACCATCACCACACGACCAACAGCACCA  
TCAGTCCGAGTACGTTCAACTGGGGGCGAGAGAAGTATCGGGTGGCGAGGGTGGGGA  
TAACGAAGCGCCGAGCGAGGTCCCCGTATTGCCGGAGGAAAATCGGGCCGCGCAGTCA  
CGCGGCTTGCTCCACGATGCATCGTTACGGTACTGAAGCGCTCTCGCCGGCAGCGGCC  
GATCATCACAACAACAACCACCACCACCACCACAACCACCACCACCACCACCAC  
CACCACCACCACCACAGTAACAACCATCACCACCACCATCAACAGCACCATCACCAGC  
ATCTACAGTCGACGGACACGGCCCAACAACACGGCGCGCTCTCCTCGGCGAGCCATCG  
CCACTTGACGAGCAGGAGGCGCAGCCGAGTCACAGTCGCATCAAAAACCGGACGA  
GGACGTCGTGGAGCGAGCGAGTGGAATCGCGGTAGCGATGAGCGGCGCACGCGGCGA  
CTTCAACCTCGGCATGCTGTTTCCGAATCTGGCCACCACTGGCGCGGCGCGTTCCCCA

GCAGAGATAGGTGGAAACGATGGCCAGCAGCAGCAACAGCAGCACAATCGCCATCAC  
CAGCAGCAGCAGCAGCATCATCATCACAATCATCATCACTTGGAGGAAGTTTTGCCGG  
ATACGGCGTATCTTCAGCATCAGATGCGCGGCGGAGGTGGCAACGGAGGAGGTGGCG  
GTAATGGCAACAATGGAGGAGGTGGCGGAGGAGGTGGCAGCGGCGCGGAGGGCAGC  
GGTGGGAAGCGGCAGTGGAGGAGGAGGAGGAGGAGGCGGATGCTCACCGGCGCTTCG  
AACCGGTAGCTCACCGGGTTCCAGTCGTAGCCCGCACGAGGATCAAGAGCTCTCGTCT  
CCTCATCGCCAGGGGCGAGGCAGAGGGAGGATACAGCCCGAGCGAGCAAGGGAGACA  
GTCGTACGCCCATTTGACAGCTATGCAGCCACCTTCCTCGGTACAGTCGAACCACGGC  
CTTGGCCAGGATACCGACCGAGTCTCCGATCAGATTTACATGGACTCGATATACGCTCA  
TCACACTGTCTGGCACGCTCATCATCATCAGGAACACGAGCCAGGATCGTCGACTCCT  
CACTCGCCCAGCGGACCGCTTACAAGTTCGTTATATCGTTCGATAAGCGATGTCAGTAG  
TATGACGGCGGCCAGCGCGGCAGGAACAGGAGGTACTTACGGCCTTCCTTACATGACC  
GGCAGCCCAACAGAATTGACCGCCTCGCCCCAGCAATTGTGGAACGCTCAAGGTCTG  
GGGACAGGACTTCCCGCCATCTCGGAGGATTACGGCGCTGGCAGCAAGTCGACAGGC  
ACGGTGACGCATCAGGCGTTGCCAGGATTTTCGCAACCGTTCTGCGGCAGGGCGAGCT  
TTCGAGGATACAGCCCGTCTTATCCGACGCAGCAAAGCAACGCCGGGGTCTGGGGCTG  
GGACTGTGGAGCCCTCGTCGTGGAATTATGGCTCGCCTTCGAACGACACCCTGGCCAC  
CCAATACGCCGCCCTTCGAGGCGGCAACCCGTTAACCTCCGTCGACACCCGCGCAG  
CATCAGCTCACAGCCACTGCTAGTCTTAGCGCGA

>novel\_circ\_001464

AATTGGCCGAATGCCAAGTGGACGAAATGACGGGCTACGAGAAAGGGACGGAGAGAT  
CCGTGAAACTGATCTCTGGCGAGAGCATCGAGGAAACGAACAACGACGGTGGATCGA  
TGGGATTGTTGGAGACGGACGGCGGGGACGTGGTACTTTTTTCGTCAGGAGACACAAC  
AACAGAAGCAACAACAACAACAACAACAACAACAACAACAACAACAACAACAG  
CAACGGCAACGCCACCAACTTTACCAACTACCTTACGAAAAGCATGGAAGCGAAGAG  
GGCGGGGACATGGTGGGCGTGCTGGAGGCGGGACAACAGGAAATTGAAAATGGCGC  
GGTCGGCGAGGCGAGTGACGCCGAACCGGTAGAAATCCCCGTCTACCGGAACAAGG  
AAACGACGTAGACGACGCTTACGGCGTGCACTCGCTCGGCTTTAACGCTCAGGACCCT  
CTGGTTCGAGAAAGGGGTTATCTCGATCAGGACTCGTACGGGGGCGGCGATTTAGGCG  
GCGATTCTCTGAAGCAGGAGGAGCAGCAGTTGCAGCAACAGCAGCAACAGATCTCTC  
AACCTCTCCACCACCATCATCACCACAACAGCAGCGTCAGCAATCGCACCACCACCA  
CCATCACCACCACCACCAGCAGCAGCACCACCATCACCACCAACAGCATCAGCAGCA  
GCAGCACTACCACCGCCATCAGCACAGCGACCATCACCACACGACCAACAGCACCA  
TCAGTCCGAGTACGTTCAACTGGGGGCGAGAGAAGTATCGGGTGGCGAGGGTGGGGA  
TAACGAAGCGCCGAGCGAGGTCCCCGTATTGCCGGAGGAAAATCGGGCCGGCAGTCA  
CGCGGCTTGCTCCACGATGCATCGTTACGGTACTGAAGCGCTCTCGCCGGCAGCGGCC  
GATCATCACAACAACAACCACCACCACCACCACAACCACCACCACCACCACCAC  
CACCACCACCACCACAGTAACAACCATCACCACCACCATCAACAGCACCATCACCAGC  
ATCTACAGTCGACGGACACGGCCCAACAACACGGCGCGCTCTCCTCGGCGAGCCATCG  
CCACTTGACGAGCAGGAGGCGCAGCCGAGTCACAGTCGCATCAAAAACCGGACGA  
GGACGTCGTGGAGCGAGCGAGTGGAATCGCGGTAGCGATGAGCGGCGCACGCGGCGA  
CTTCAACCTCGGCATGCTGTTTCCGAATCTGGCCACCCTGGCGCGGCGGTTCCCCA  
GCAGAGATAGGTGGAAACGATGGCCAGCAGCAGCAACAGCAGCACAATCGCCATCAC

CAGCAGCAGCAGCAGCATCATCATCAATCATCATCACTTGGAGGAAGTTTTGCCGG  
ATACGGCGTATCTTCAGCATCAGATGCGCGGCGGAGGTGGCAACGGAGGAGGTGGCG  
GTAATGGCAACAATGGAGGAGGTGGCGGAGGAGGTGGCAGCGGCGCGGAGGGCAGC  
GGTGGGAAGCGGCAGTGGAGGAGGAGGAGGAGGAGGCGGATGCTCACCGGCGCTTCG  
AACCGGTAGCTCACCGGGTTCCAGTCGTAGCCCGCACGAGGATCAAGAGCTCTCGTCT  
CCTCATCGCCAGGGGCAGGCAGAGGGAGGATACAGCCCGAGCGAGCAAGGGAGACA  
GTCGTACGCCCATTTGACAGCTATGCAGCCACCTTCCTCGGTACAGTCGAACCACGGC  
CTTGGCCAGGATACCGACCGAGTCTCCGATCAGATTTACATGGACTCGATATACGCTCA  
TCACACTGTCGGCACGCCTCATCATCATCAGGAACACGAGCCAGGATCGTCGACTCCT  
CACTCGCCCAGCGGACCGCTTACAAG

>novel\_circ\_001466

CACACTATTGTTACAAAAATAGACAAAAATGGAGTAGAAACAAAAACAGAAGAATTTT  
GTGATGTAAATGAATGTGATTCATTTGGAAAAAAAATTATCATCAAATGAAAATAGT  
AATTTTCTCGATAGTGATTAAATTTCTTTTCTTGGGATAAATTTTTTAAACCTAATCCAA  
AATTATGATAAAATT

>novel\_circ\_001467

GGCCCAGAGGCCCCGCCAAGGCCAAACAGGCAGCATAAGGCTCCATCATCAACGTCG  
AATTCGGTCAGCCTGCGAGCAGTAATGACCAAAACAATAAACAAATGCCACAGTCTT  
CCAGTATACTCGATCAAGCTTTATCCGTTGAAAGCGATAGTGATGATGACCTCGAAGAT  
GCAGGAGGAAATAATGCGAGGAATGATGGTACATTACTTGCCAGTGATCCACCAAAAC  
CTTTACCCGAATTTTCTCCTTTAGACCATCCGCGGATCCATCGTCTACGTCTCGTCGACA  
ATGCTCAGAACTCGCACCTCGAAGGTAAGCCGAAAGGTGGAGCACCGAATCGGCCAC  
TTCCACCAACCCCCGACGAAGAAGAATCAGGAGATCGTACGCTAGTCATGAAACGG

>novel\_circ\_001468

ACCATCCGCGGATCCATCGTCTACGTCTCGTCGACAATGCTCAGAACTCGCACCTCGAA  
GGTAAGCCGAAAGGTGGAGCACCGAATCGGCCACTTCCACCAACCCCCGACGAAGAA  
GAATCAGGAGATCGTACGCTAGTCATGAAACGGAACTTAGTCAGATGTCAGACGATC  
GCACGGCGAACATCAACACCAACACCACTACCACCACCACCACCACCACCACCACCA  
CCTACTACCAATAATAACAACAACAACCGACGCTCCGAGGCCGAGGAGCAACTCCTGCT  
CAAAGAGTGGGATTTACCCGTTTTTTCCAAGGTTTAAACGAACGATTGGATAAAATGA  
AACAGCAAGAGTCGTCTGCAAGAGTCGTCTGTCGAGCGCAGAGGCGTGCAACAAGCCC  
CCCTCCTCCTCCTCCTCGGTTAACGAGAATCACCTTTCCTCCTCGTCCACGGAGAAAAC  
GTTAAAGAGGCAGGAACAATTGTCGTCACGCAGAAAGTACGATAATCAGCAACAGCA  
ACAGCAGCATCATCATCATCAAAAGCATCAGCAACAGCAGTTGAAGGCGGTGCACAG  
GCGGCAAGAGAGCGACTCGAAGCTTGGTGGGAACACGTCCAGCGCTTTTGCACGCGC  
TTTCCGCCGTGAGAATTCCGACTTTTTTCCCGTCCGCGAGACACTCTGCATACTTACAGA  
AGTCGGACACCTCGAGATCGAGCATATTCTCGAGCGGGAACAGGCGTGGCAGCGAGAT  
AAGCGTTGCAGGTATCGCCGGGAAAAAGGGGAACGCTGTGAGCGCCGGTGAACCGGT  
GCTTACAGACTTCTCGTTCGGTTCGTGACGGTGTTTCAGAGGCCTAGAAGGGAGAAAAC  
CGAGAGCGAGATCGTTTTTGGTAGTAGGCACGAGGCAAGAAGGCTCGACTTTGGACG  
CGATAAAGATGACACCGCGAGGAGGCGATGTTGTAGGCCATCGGACGCGGTTTCCGCC

GCGGTCGACGAAGCGGGAACGATTAAATCTACGGCCAGTACAACGGCTAGCGAGTAC  
AGCCCCATTGTCACCCAGAATCGAGAAAGCGGTGATCGTTCGAGAGGCGGAGGCAGC  
GGTGGCGACTTCCAGAGGTCGGATTTCGTCTCCCGGATCTCGGCCGAGCTCCGTGTTGC  
CAGATCTCCTCACCTCGTCGCCTGGCCAGCGACAGGATAAGACAACAAGCGAAGAG

>novel\_circ\_001469

AAACTTAGTCAGATGTCAGACGATCGCACGGCGAACATCAACACCAACACCACTACCA  
CCACCACCACCACCACCACCACCACCACCACCACCACCACCACCACCACCACCACCACCACC  
CGAGGCCGAGGAGCAACTCCTGCTCAAAGAGTGGGATTTACCCGTTTTTTTCCAAGGT  
TTTAACGAACGATTGGATAAAATGAAACAGCAAGAGTCGTGCAAGAGTCGTGTCGTCGA  
GCGCAGAGGCGTGCAACAAGCCCCCTCCTCCTCCTCCTCGGTAAACGAGAATCACCT  
TTCCTCCTCGTCCACGGAGAAAACGTTAAAGAGGCAGGAACAATTGTCGTCACGCAG  
AAAGTACGATAATCAGCAACAGCAACAGCAGCATCATCATCAAAAGCATCAGCAA  
CAGCAGTTGAAGGCGGTGCACAGGCGGCAAGAGAGCGACTCGAAGCTTGGTGGGAA  
CACGTCCAGCGCTTTTGCACGCGCTTTCCGCCGTGAGAATTCCGACTTTTTTCCCGTCCG  
CGAGACACTCTGCATACTTACAGAAGTCGGACACCTCGAGATCGAGCATATTCTCGAG  
CGGGAACAGGCGTGGCAGCGAGATAAGCGTTGCAGGTATCGCCGGGAAAAAGGGGA  
ACGCTGTGAGCGCCGGTGAACCGGTGCTTACAGACTTCTCGTTCGGTCGTGACGGTGT  
TCAGAGGCCTAGAAGGGAGAAAACCGAGAGCGAGATCGTTTTTTGGTAGTAGGCACGA  
GGCAAGAAGGCTCGACTTTGGACGCGATAAAGATGACACCGCGAGGAGGCGATGTTG  
TAGGCCATCGGACGCGGTTTCCGCCGCGGTTCGACGAAGCGGGAACGATTAAATCTACG  
GCCAGTACAACGGCTAGCGAGTACAGCCCCATTGTCACCCAGAATCGAGAAAGCGGT  
GATCGTTTCGAGAGGCGGAGGCAGCGGTGGCGACTTCCAGAGGTCGGATTCGTCTCCC  
GGATCTCGGCCGAGCTCCGTGTTGCCAGATCTCCTCACCTCGTCGCCTGGCCAGCGAC  
AGGATAAGACAACAAGCGAAGAG

>novel\_circ\_001470

AATCGAGAAAGCGGTGATCGTTCGAGAGGCGGAGGCAGCGGTGGCGACTTCCAGAGG  
TCGGATTTCGTCTCCCGGATCTCGGCCGAGCTCCGTGTTGCCAGATCTCCTCACCTCGTC  
GCCTGGCCAGCGACAGGATAAGACAACAAGCGAAGAGTACCGGCAAGCAGTTAAATC  
ACCACAACACTACTTGACATCAACAGAAACAGAGATCTTTCTTGACCTTTGGATTTGGTG  
CGGGACCAGCTAGAAGGGAATCTCATGTAAATGTTAATGTGACACCGACCAGCCATGA  
CCTTACATCTGATACACCTGAAATACGCAAATACAAGAAGCGATTCAACAGTGAAATTC  
TTTGTGCTGCGCTTTGGGGAGTAAATCTATTAATTGGTACCGAAAACGGCCTTGTTAT  
TGGATAGAAGTGGTCAAGGAAAAGTATATCAATTAATAAGCAGAAGACGATTTCAACA  
AATGGAAGTTCTTGAAGGACAAAATATTTTGGTTACAATTAGTGGAAGGAAAGAAATAGA  
GTACGGGTATATTATCTTTCTTGGCTTAAGAGTAAAATTTTGCGAACGGATGGACATAGC  
GATCAAGTTGAACGGCGCAATGGCTGGATTAATGTTGGAGATCTTCAGGGTGCGGTAC  
ATTTTAAGATAGTCAAATACGAAAGAATAAAGTTTCTTGTCATTGCATTAAAAGATTCTGA  
TAGAAATTTATGCTTGGGCTCCGAAACCTTATCACAATTTATGGCGTTTAAATCGTTCA  
GTGAACCTGCACACAGACCATTACTTGTGATCTTACTATAGAAGAGGGTTTCGAGATTG  
AAAGTTATTTATGGCAGCGCCGATGGTTTTTACGCTGTTGATTTGGATTCTGCTACGGTT  
TATGATATTTATCTGCCAAAACATACTCAAGGCCCATTTGTCCACATTGTATCGTTGCAT  
TACCAAACAGTAATGGCATGCAGTTACTGTTATGTTATGATAATGAGGGTGTATACGTGA



ATACTTATGGTAGATTATCTAAAACCATGGTTCTACAATGGGGTGAAATGCCCACTAGTG  
TTGCATATATCGGTACAGGACAAATCATGGGCTGGGGTAACAAAGCTATTGAGATTAGA  
AGCGTAGAAAGTGGACACCTTGATGGTGTGTTTCATGCACAAGAAAGCTCAACGGCTC  
AAGTTCCTTTGCGAGCGTAATGATAAGGTATTTTTCTCGTCAGCTAAAGGCGGAAGTGC  
GTGCCAGATTTACTTCATGACATTAAATAAACCTGGCATGGCTAACTGGTGATCCCGAAT  
ATGGCCAAATCTGGCCCTCAAATTATCTTTACGAATAAGGACACAAAATCTTTCTCGTAT  
ATCGAGATACGCATCATCGCCATTCATGTTAATTCGTTTTTCACTGCCAGGATTTAAGGC  
CATGGAAAGCAAGCAAT

>novel\_circ\_001471

ATAGGAGGTGGTTCAGTGATAGATACTTGTAAGGTAGCAAATCTTTATAGTTCTGATCCA  
CAAGCAGACTTCTTAGATTATGTAAATGCACCTATTGGTAAAGGAAAACCAGTTACAGT  
ACAGTTAAAACCATTAATAGCTGTACCAACTACATCTGGTACTGGTTCAGAAACAACCTG  
GTGTTTCTATCTTTGATTATCAACCACTTAAAGCCAAAACCTGGAATTGCCAATAGAGCA  
TTGAAACCCACTTTAGGTCTTATTGATCCAAACCATACATTGAGTTTGCCAGAAAGAGT  
CTGTGCTTATTCTGGCTTTGATGTACTATGTCATGCTCTTGAATCTTTTACTGCATTACCA  
TATACTGAAAGAACTTGTCCCTCTAATCCGATACTTAGACCAGCCTACCAAGGAAGCAA  
TCCTATTAGTGATGTATGGTCAAGATATGCTCTTCAAATAATGCATAA

>novel\_circ\_001472

CTACCAGTTTAACTAGACTCAATCTTGCGGGTAATCCTTTGACAACATTACAAGTAACA  
CCATTCCTGAAGACTCCCAGTCTTACTAAACTCGACGTAAGCAGATGCGCTTTGGAAA  
GAGTATGGAGTGAGGCTAGAGTTCCATTGACTACTTTACGGTAT

>novel\_circ\_001473

GGAAAAATCTTCCGGTCCACTGCGTGGTCGAGACCATACACAACATCGTCGAGACACA  
CGTGAGCAATTCTCGTGAGAATTGGCGTAGGCCTCAGGTGGAGACGGACTCGTACGTC  
ATCATTCCTGTAGCTATGCCTTTTCAGGATCTGGTGGGGGAGGCTCTGGTGCGGCTTGG  
ATACTCGAGCGACCTGATACCAAGCGCGAGGGGCAGTATCGTGATAAGGAATTGGAAA  
CCTCTGCCGATGGAGAAGGTGCGCGACGGCCCGCTGTTGACGGTGGGCGACATATTGG  
CCGAGTTGACGTCGGTCGCAACGCTCAAGATCCAAGTGTACAGGTGAGGCCACCGC  
CCCCGAGCCCCGCCGCGGAGGTCAGGAACAAATTGTTGAGACTGTTGCTGCTACACA  
GCCATGCGCTCCTCGTCTCTGCCGGTTGTCCCCTCGACGAG

>novel\_circ\_001474

AGCCAAGCTTTGGCATTGACACACAAGGCCTCGCCACCTTCGAGGCCGAGCAGTGTG  
TCCTCGTTACCGAGGAGCCCTCAGTCTCACCAGTCCCAACAGTCTCAGCCGCAGAATG  
CTACGCAACTTCCGCCTGTGCATCCTCATCAATCGCAGACACCCCTAAGCACACCCCA  
GACACCGTTTTCCGCGCACAATCAACACCCCAAGCAGGAGGCGAACACGAGCCCGAA  
ACAGGAGGGGTTTCGATCTCAGCAAATCTACCTCGAGCACGGGGAAAAATCTTCCGGTC  
CACTGCGTGGTCGAGACCATACACAACATCGTCGAGACACACGTGAGCAATTCTCGTG  
AGAATTGGCGTAGGCCTCAGGTGGAGACGGACTCGTACGTCATCATTCTGTAGCTATG  
CCTTTTCAGGATCTGGTGGGGGAGGCTCTGGTGCGGCTTGGATACTCGAGCGACCTGA  
TACCAAGCGCGAGGGGCAGTATCGTGATAAGGAATTGGAAACCTCTGCCGATGGAGAA

GGTCGCGGACGGCCCGCTGTTGACGGTGGGCGACATATTGGCCGAGTTGACGTCGGTC  
GCAACGCTCAAGATCCAAGTGTACAGGTCGAGGCCACCGCCCCCGAGCCCCGCCGCG  
GAGGTCAGGAACAAATTGTTGAGACTGTTGCTGCTACACAGCCATGCGCTCCTCGTCT  
CTGCCGGTTGTCCCCTCGACGAG

>novel\_circ\_001475

AGCCAAGCTTTGGCATTGACACACAAGGCCTCGCCACCTTCGAGGCCGAGCAGTGTG  
TCCTCGTTACCGAGGAGCCCTCAGTCTCACCAGTCCCAACAGTCTCAGCCGCAGAATG  
CTACGCAACTTCCGCCTGTGCATCCTCATCAATCGCAGACACCCCTAAGCACACCCCA  
GACACCGTTTTCCGCGCACAAATCAACACCCCAAGCAGGAGGCGAACACGAGCCCGAA  
ACAGGAGGGGTTTCGATCTCAGCAAATCTACCTCGAGCACGG

>novel\_circ\_001476

GTAACATCCTACATCAGAGAATCATCATTTTTCTCTAAATGGTGGCAAGCCTGTGACGT  
GATTAACCGTTGACCAAAGTACCAGAGAAAGGTGTCAAATGAGCAGGTCGTCCTCC  
CGTCCGGCGGTGATCTCGCCAAAATTTGGAGGATGTTGATGCCCGGTGCTGCTGGCCT  
CAGTGCCGTAGGCGCGGTGGGCGCCGTCGGGGCGCCAGGGCCGGACGAATTGGTCTC  
GGGCCTTGGCGCTTTGGCGGGCACACGCCCAACAGAAAGACACCACATGGACGAA  
ACTTTTCGTCGGCGGTTTACCATAACCACACCACCGACAAGAGTCTCAGGGAACATTTC  
AACGTGTACGGGGACATCGAGGAGGCGGTCTGTCATTACCGACAGGCAGACCGGCAAA  
AGTAGAGGTTACGGTTTTCTGTGATCATGGGAGACAGGCCAGCGGCGGAGAGGGCGTGC  
AAAGACCCGAACCCCATATCGACGGCCGCAAAGCAAACGTCAACTTGGCGATTCTTG  
GAGCAAAGCCCAGGGGTAATCTGCAAGCGA

>novel\_circ\_001477

ACGATGTATACTGACGGTCTCCTTACACTCCACTATGGGAAGCATCCGGCGACCTTGGC  
CGCGGAGGTCGGAGCCTGGTACACCGGGGACCGTCACGTGGACGTGACGTTGGCATG  
CGACGATGGGTCGGTAGTGAAGGCCCATCGCGTTGTTCTGGCCGCAGCTAGTCCCCTT  
TTGGCTAGTCTCCTTCGTAACCCCGCCCTGGACCACGTGGTCCACTTGTGAGGGGTGC  
GAAAAACCCAGCTCACCCACCTCCTGGAATTCCTCTACAACGGAGAAGCCCTCATCCC  
GTCGACGGAGCTCACGCCGCTCAGGGAATTGTTTCGAGCTTCTTCAGATAAAGTCGGAG  
CTGTTTCGAGCCTAATCAACCGCAGACCTCCGCCAACTCCGACCCCGAAAGGATACCCA  
CCCCCAACCCCTCCGAGGGGCCAGGAGAGCTCCAGCTACGAATCGCAGTACGACGGCA  
GACAATCCAACAATCCCGCGGACTGTTGCTCGGTGCTCATAAAGACGGAGGGCTGCGA  
GGAGGAGGCGGAGGTGGACGTGGAGGGCGTGGAGGAGGCGCTGCTCACCGAGGGGA  
ACAGGGAGAGCAGCATAGAACCGCCTAGGCGGAGGGACAGCTCCGACCCCGTGAATC  
TGAGCTTGAATCGGGCACGTCGACCACAGCGAGAGTTCCACGACATCGTGCCCA  
GGCCGGAGAAACAGTTGCTGGAGAGGCGGGAGTCACTGGAGGAGGCGGAGGAGAGG  
AGGAGGCAGCTGGCCGCCCGGCTAGCGCTAGGCCTGGAGCCCGGGAAGCGAAAGCCC  
GAGGAGATCCCGATCCCGCCCCGCCGAGGCGTACATCGTGACCCCTCACAGGAAGCGA  
AGGCCAGGCTTCCACAACGCGCCCGCACAGAACCCTGCCTTCGTCCCGTTCAACCCCG  
GATTCGAGACCCCGAGGAGATTGCAAGCGCCTCGTCCCCTCAGCGTCTCCACACCCCC  
CTACCTG

>novel\_circ\_001479

CTTCCTATTTCTTCTCTAAAAAAAATGCTAAATACGTTCTAAATCATAATACCGTGTATA  
CATGAATTTATACATTATTACCAGTTACGAAAACGGTGGACATCTGACTATCAGCACAAA  
TATATTCTGTCAATTTCTTTTTCTTTCCTTCTTTTTTTTTCTTTTTCTTTTTCTTTTTT  
AATATGAAACATACGACAATAGCTACACATCAGCTTAAATTTCGATTATTATTATTATTATTA  
TTATTACACGTTACTCGAACACCTTGGTTGGTTCATAATAATATAGAAAAAATGAGAGA  
GAAAAAAAAAAAAAAAAAAAAAAAAAAAAAAAAAGAAGAAGAGGAGAGAGAAAAAAAAA  
AGAAAAAATACGCATGGAATAATTAATGAATAGCGTGATTAACCTTTGACGATCAACACC  
ACTGTTTTTTTACGTATAAAAATAGCGTTATAACTATTATGAGAGAGAAACAAGTATGAA  
AATACTTTTCGTATATAGTTGTTACTTGCATAATCTCTGTCCACCACGTTATTCGTAAATGA  
ACATATTTCCAAGTTCACAAGACTAATAACTTACATCGACGCGTCATATGTATTTCGTTGC  
CTGAGTGAACAATTGGACAATAAAATCTAGAATTTCTCTTTGATTCATATTATTGAAGTA  
TAGGTATATAAAAGAACTTTAATAATGAAATTACATAACAGTATAGTGACTGAATACTG  
ACAAAGTCATTTGTATTCCATTGATTGTAAATTTTGCAAAGAAGAAACAGAAATATAA  
TATATATATATATATATTTTATATAATTATAGATATTTATATATAATTATAAATATATATACATAT  
ATATAGAAGAGAGAGAAAGAAAGAGAAAGAAAGAAAGATATATATATATATATATATGTG  
CATACATATATACATACATATATATATATTTGTTTACAAAAAATTCGAGATAATAGTGTCCA  
AATGTCACTTATTCTTTTTCTATTTTCGCAATAAAATAACGCAACGCAATACGGCAAAGTC  
GTTATGCAAAGTTTGCGCATATAGTACCACCTTGTCATAAAAAAAAAAAAAAAAAAAAAA  
AGAATGAATAATAATAATAATAATAGTAGTAAAGTAAGAATATATAAAGCGGTAGTGGTA  
CTAATCATAATAATAATAGTAATATTACGGCATGAATCTACACTCTTACATATAGACTAAG  
GTCCAACTAAACAACCTTGTGCCGTAAAATTGTACACTATGTAACGAGAAAGTGAGGTG  
GATCACTTTTCGTTGTGAATATTTCTTCTTGTGAATGTTCTTGGCAGGGCCTCCGAGTTGA  
CAAACAGACTCGACGATCAAAAATCAATCATATAGAATTAGAATTTGAAA

>novel\_circ\_001480

GAACGGGCTAAGAGGAGGACATTGTTTCGTCGCGCTGTTATCCTCGGCGGGGTGGGGCG  
GAAGGAGGAATATTCCGGAAGATATCTCCGGTTTTTCGTGAGAACCACCTCTTCTCCGC  
CGTCGTACGTGAGAAATAACTGGCAGAGGTCGGCCTTGAGGTGTGGAAACACAACAC  
AACGGGGCCCGGTGGTCGGTGGTTGGTGCGCCGCCGTTGTAGCGGTGTAGTGGTGGTAG  
TAGTAATCTCGGAGCGGCGCGGGAGGGGAGGGGGCGGGTGGGTGGGGGGACTCGG  
CATCGCGCAGAGAGAGAGATTATTTCGAGTTTCACAAGCTCTCTCGATCACCGGCACC  
GGTCGTGACCTCGATAGAGCTCATCCACCTGGTTGTGTTGGATAACTCGAAGCAGCAG  
TGGCAGCCGCCGCCGCCACAGGACCTGAAAGGTCGAGAGCTCTCCTTTGCAATCTCC  
TTTCGCGCGATATTTCGCCTCTTCTTCTCCTTCTTATTCTTCTTCTTTTTTCGGTTGCA  
CGAAAAGTAGCGACGATTTTCCTACCCGTTATCCTTGTGCAACGGCGCGCGCTTCCTTT  
GTTATGTATCGTTCCACGTGTCTGTGCGCAGAGTAGCAGAGTAGTCGCGCGCCAAGGT  
GGAAAGAGATAGGGATATATTCGCGGCTGTTTCGGGAGAGAGAAAAGGATGAAAACGATG  
GGCGACGTGGTCGCGGATCCCATCGAGGAGGAGAGCAGCGGGGAGGGCGGCACTGC  
GCAGAATCCGAGCGGCGGGAAAGAATTCGGGCAGAGGACGCTCAGATCGTTGAAGAG  
GGGGCTCGGCAGGCTTTGGAGGAGGCATCGTGGCAATGCCTCGATCACCGAGTACGAC  
CCCTGCTACAAGGTCGCTTATCTTGGGAACGTTCTCACTGGATGGGCCAAAG

>novel\_circ\_001481

GTGTGAACATACTATGAAAGAATTGGAATACTACAGAGGACAGCATATAGCAGTCATGA  
ATCAGTTAGAGGCAACATCACAAAGAGAGTTCCGCACTGCGGGGCAAATATGGAGATCT  
GGTAAATGATAAGCAACGCCTGGATCGGGAAGTTCAGGCGTTGCAGAAAGAAGTGTC  
CGAATTGCGATGCCAAAATCAAGAAGTTCTTGTTTCCGATGCTGGTAATAGCGACACCA  
TGAATCAACATTATTTATCTGCGCTTCGAAAATACGAAGCCGTTAAAGATGAGTATGATG  
CCCTTCGAAAACGGTACGATGACTTAATATCGTCTCATTTCATCGGCTGTTAACAAGTTG  
GAATTATCGCAAGAAGAAGCTGCCAGATTGAAGAAACAATACGATGAAATTGTTCAAG  
AGCGCAATAGTGCGGTTTCGTGAGCGTAATGGTTTGAAGCAACAGTGCACAGCTGCGAT  
TAGACAATGGGATATTGCGTTGAGGGAGAGAAACGAATATCGCGAAGCTTTGGCCAAA  
GTGCAGCAACAGCACGAGGAGGCGGTGAAAGAAATTAATCATGCAATGGTGCTACGC  
ATGAAGGCTAGCAAGGATATGAAACGATTAACAGAGGAGAGGAATGCTGCGTTGCAA  
GAATACAGTTTAATTATGGGTGAAAGGGATACGGTGCATAAGGAGATGGAGAAGCTTG  
GGGATGATCTTACGCAGGCATATACAAAGATCACCCATATAGAAAATCAGAACAAGCAA  
TTTATGGAAGAGAAAAAAGCTTTATCCTATCAGATAGAACTTTAAGGAGGGAAATTTTC  
ATCGGCTCTGCAAGATCGGGACGAGGCTTTAAAGCAATGCAACGAACTGCGTCAAAA  
GTTTCGGCGATTATTCCGAGGGTTCGAGTCGAGATTACAAAAATCGGATGGAATTGCATT  
CGTCGTACAACCACGAGCGTGACAATTCGAGCAAAGAGGCCGAGAGAGAGAGCAAC  
ACCGCTGATTACACTAAACGCGACAAAGAGCGTATGGATAATTTGGATCAAGCGAATCT  
CGAGTTGGATAAACTGAGGAAATCCGTTGACAAGTTGCAGACGGAGCTGGAGGAAGC  
TTTGCAAGAAGCTGAGGTGTGCAAGCGGAGACGAGATTGGGCGTTCAGCGAGAGGGA  
CAAGATAGTGTTGGAGAGGGAAAGCATCAGAACGTTGTGCGACAGGTTGAGGAAGGA  
GCGCGACCGAGCCGTGTCGGAATTGGCCGGGGCTTTGCGCGATTCCGACGACATCAAG  
AAGCAACGGAACGAGGCGTCAAGGAGTTGAAGGATCTCAAGGAGAAGATCGAGTC  
CGGCGATCACGCGTTGCGAGCGAATCAATTTGCCCAAACGTTGGGCATCCACGATTCTG  
ACGCTCGACACCGACGCGAACGATTGGGAAATTATCCCCGTCCACTTGGACCTCGGCC  
GACTTTGCCTAGATTCTGATCGTGACCTTGGATTGACGCTGGTCGGTGGCCGTGACAAT  
CCTTATTATCCCAACGACACGGGAATTTACGTCGCCCAGGTGATATCCGGAAGCGCGAC  
CGACGGCAAATTGAGAGCGAACGATTGCATCGTGCGAGTGAACAACGTGGATTGTACA  
TCCGTTTCCACCCGTATCATCATGGAACTTTACGTACCTGCTCGGGCGGTTCCGCCAC  
GTTGACGGTAAGGAGACGACGTTTGACCAGAAGATCGTTGAGGACCACTCAATTGTCC  
GTTGGCTCGGTTTCTCATGGTATTTCTTTGGAACTCGGTGTATACATTTCAAAGATCTCG  
CCCGGCAGTCTAGCGGCTAAAGATGGCAATCTTGCCGTTGGGGACAGAGTTCTGAACA  
TTAATAGTAAACCGATGGAAGGGATCAATTCCAGTCATGAAGCAATGGCAACATTGAA  
CGATACGAGCACGGATGTGTTGACTATTACAACATTGAAGGGGATACCATTGCCTTCGG  
CTACCAGTTCCGAGACAATGACCATCGACGCCAGTTTCGGCGCAGAGAAACAGAAAA  
TGGTGAACAGTTGTTCCCAGACGGAGCAAGGGAGGATATTGTTGAAAATCCCGTCGGA  
CGATTACGAGAGAAGGCACGTTGCTTCGAACTTCGGCGACAGAAGTATATACAAAGTA  
TCGAAATCGGTGAGCGGCGAGAAGCCGAGCGGGATCAGCAATGCCTGGGACAATATA  
AGGGAGAAGATCGACATAGTTCGGGGGCGGAAGCACAGCAAGGATCGGGAGGAGAA  
GAAGAAACGGCATCGAACTCGAGCCCGAACACGTTTCGAGCAAGAGCAGGACGCCAT  
AGCCGAGTTGGATTCCGTGATAGAGAGTTATACAAGAAGGCGAACAACGGGGTGTT  
GAAACGGAGCAAGCGGCGGGGAACCGAGAAAGCCGTGGAGAAGAACGGAGGTACGT  
GGCCGAAGGCCAGGGGCGGACCCCTGATACAGAACGGCACCGGTACCATTTTGCACT  
CCCGTAAGACGAAAGAAAGATTGCCCTAAGCGTGCTCCTCAACCAACAACCGCCCA

AGTACGAGAGCACTTACAATTACAACCGTATCTCCAACCCCATCCCGTTGACCAATTTT  
CCCGTCAACGTGAACAATCGGCACACCGTGTACAAATCCGTAGAGAAACCGTTGTCTGA  
ACTTCCTTAAAACCGCCGGCCCGTTATTTCAGTCAGAAATCCTTTACTCCAGTGGTCCAG  
TTCAAAGATATACCGATAGATAAGCAGAAATCGGCGGCGGCCGAGTACGAGAGCACGG  
AGGTGAACAGGCTTGGCTCGACCCTAACCCCGTCCGAGACCAGCATCGACTTCTCCGT  
GAAGTCGGGCAAAGACGTGGATTATTTACGAGGAAGAGGGCGCAAAAGTATACGGT  
TGGGAGCGAGGAGCGTCAACAAGTGGACGCGTCACAGCACAAACAGGGCCCAGTCCC  
AAGTTTATTTCGGGGGGCCGGATCGTCAACCTCGTCGACCAGCGGGCCTAGACAACAATT  
GGCAACAACCGGTAATTTTTTCATTTCCCCCGTACACGCATTTCGCATCCGCATCCCCATC  
AACAAAACCTCTTTGCCGTGAGGTACCCCTCCCCGCCCTCCTTGCCGTCTGCACAGTC  
GGGGGAGTCGATAGGGCTTCCCGATGCACGATCTTATTGTTTCGAACCTTCGTATAGCC  
CCGGCCCCGCAAACAGGATTCGCAGGGCATTTCACACACACCCTCCGTAGACTTGCATTA  
TCACAAAGCTCGCGGACCGCCGATCCACGCCAACGCGTACGACGTAGTGTCTGGCTGTC  
GCGTCGTCGTACACGCACGGTTACGAGGGCGGCACGTTTCCGAGGAAGAAGGAGAAC  
CAACGGTTTCGAATACCGTCCAATCCTAGCGTCACGTCCAAGAGCAGCGTGGGCAAAT  
TGTC AACGGGCAGTATAGAGAGAACTTCGGAAGGGGGAGCCCGATGCCGACGTTCC  
ACGTCGAGGTGCTTAGCCCCGGCACGGGAGGGAGTAGCTCCGGTGGAACATAAGAG  
GAAGTGGCGGGAACAAGAGATCCAGCATGCCCGATTATTGCTACTCCCAACCTAGGCC  
CGCACCGGGCGAACTGAGAAGGGTTCATATAGACAAATCCGTGAGCCGTTGGGCATA  
CAAATTTCTGCTGGAGAGCGGAGGTGTATTCGTTTCCACGGTCAGCGAGCACAGTT  
TAGCGTCCCAAGTGGGCCTTCAAATCGGCGATCAATTGCTCGAGGTCTGCGGCATCAAT  
ATGAGGAGCGCCACTTATCAACTTGCTGCCAATGTGTTACGCCAGTGCGGTAATTCCAT  
TACGATGCTGGTGCAGTACAGTCCAGACA

>novel\_circ\_001482

GTGTGAACATACTATGAAAGAATTGGAATACTACAGAGGACAGCATATAGCAGTCATGA  
ATCAGTTAGAGGCAACATCACAAAGAGAGTTCCGCACTGCGGGGCAAATATGGAGATCT  
GGTAAATGATAAGCAACGCCTGGATCGGGAAGTTCAGGCGTTGCAGAAAGAAGTGTC  
CGAATTGCGATGCCAAAATCAAGAAGTTCTTGTTTCCGATGCTGGTAATAGCGACACCA  
TGAATCAACATTATTTATCTGCGCTTCGAAAATACGAAGCCGTTAAAGATGAGTATGATG  
CCCTTCGAAAACGGTACGATGACTTAATATCGTCTCATTTCATCGGCTGTTAACAAGTTG  
GAATTATCGCAAGAAGAAGCTGCCAGATTGAAGAAACAATACGATGAAATTGTTCAAG  
AGCGCAATAGTGCGGTTTCGTGAGCGTAATGGTTTGAAGCAACAGTGCACAGCTGCGAT  
TAGACAATGGGATATTGCGTTGAGGGAGAGAAACGAATATCGCGAAGCTTTGGCCAAA  
GTGCAGCAACAGCACGAGGAGGCGGTGAAAGAAATTAATCATGCAATGGTGCTACGC  
ATGAAGGCTAGCAAGGATATGAAACGATTAACAGAGGAGAGGAATGCTGCGTTGCAA  
GAATACAGTTTAATTATGGGTGAAAGGGATACGGTGCATAAGGAGATGGAGAAGCTTG  
GGGATGATCTTACGCAGGCATATACAAAGATCACCCATATAGAAAATCAGAACAAGCAA  
TTTATGGAAGAGAAAAAAGCTTTATCCTATCAGATAGAACTTTAAGGAGGGAAATTC  
ATCGGCTCTGCAAGATCGGGACGAGGCTTTAAAGCAATGCAACGAACTGCGTCAAAA  
GTTTCGGCGATTATTCCGAGGGTTCGAGTCGAGATTACAAAAATCGGATGGAATTGCATT  
CGTCGTACAACCACGAGCGTGACAATTCGAGCAAAGAGGCCGAGAGAGAGAGCAAC  
ACCGCTGATTACACTAAACGCGACAAAGAGCGTATGGATAATTTGGATCAAGCGAATCT  
CGAGTTGGATAAACTGAGGAAATCCGTTGACAAGTTGCAGACGGAGCTGGAGGAAGC

TTTGCAAGAAGCTGAGGTGTCGAAGCGGAGACGAGATTGGGCGTTCAGCGAGAGGGA  
CAAGATAGTGTTGGAGAGGGAAAGCATCAGAACGTTGTGCGACAGGTTGAGGAAGGA  
GCGCGACCGAGCCGTGTCGGAATTGGCCGGGGCTTTGCGCGATTCCGACGACATCAAG  
AAGCAACGGAACGAGGCGTCGAAGGAGTTGAAGGATCTCAAGGAGAAGATCGAGTC  
CGGCGATCACGCGTTGCGAGCGAATCAATTTGCCCAAACGTTGGGCATCCACGATTCG  
ACGCTCGACACCGACGCGAACGATTGGGAAATTATCCCCGTCCACTTGGACCTCGGCC  
GACTTTGCCTAGATTCTGATCGTGACCTTGGATTGACGCTGGTCGGTGGCCGTGACAAT  
CCTTATTATCCCAACGACACGGGAATTTACGTCGCCCAGGTGATATCCGGAAGCGCGAC  
CGACGGCAAATTGAGAGCGAACGATTGCATCGTGCGAGTGAACAACGTGGATTGTACA  
TCCGTTTCCACCCGTATCATCATGGAACCTTTACGTACCTGCTCGGGCGGTTCCGCCAC  
GTTGACGTAAGGAGACGACGTTTGACCAGAAGATCGTTGAGGACCACTCAATTGTCC  
GTTGGCTCGGTTCCCTCATGGTATTTCTTTGGAACTCGGTGTATACATTTCAAAGATCTCG  
CCCGGCAGTCTAGCGGCTAAAGATGGCAATCTTGCCGTTGGGGACAGAGTTCTGAACA  
TTAATAGTAAACCGATGGAAGGGATCAATTCCAGTCATGAAGCAATGGCAACATTGAA  
CGATACGAGCACGGATGTGTTGACTATTACAACATTGAAGGGGATACCATTGCCTTCGG  
CTACCAGTTCGAGACAATGACCATCGACGCCAGTTTCGGCGCAGAGAAACAGAAAA  
TGGTGAACAGTTGTTCCCAGACGGAGCAAGGGAGGATATTGTTGAAAATCCCGTCGGA  
CGATTACGAGAGAAGGCACGTTGCTTCGAACTTCGGCGACAGAAGTATATACAAAGTA  
TCGAAATCGGTGAGCGGCGAGAAGCCGAGCGGGATCAGCAATGCCTGGGACAATATA  
AGGGAGAAGATCGACATAGTTCGGGGGCGGAAGCACAGCAAGGATCGGGAGGAGAA  
GAAGAAACGGCATCGAACTCGAGCCCGAACACGTTTCGAGCAAGAGCAGGACGCCAT  
AGCCGAGTTGGATTCCGTGATAGAGAGTTATCACAAGAAGGCGAACAACGGGGTGTT  
GAAACGGAGCAAGCGGCGGGGAACCGAGAAAGCCGTGGAGAAGAACGGAGGTACGT  
GGCCGAAGGCCAGGGGCGGACCCCTGATACAGAACGGCACCGGTACCATTTTGCCT  
CCCGTAAGACGAAAGAAAGATTGCCCCTAAGCGTGCTCCTCAACCAACAACCGCCCA  
AGTACGAGAGCACTTACAATTACAACCGTATCTCCAACCCATCCCGTTGACCAATTTT  
CCCGTCAACGTGAACAATCGGCACACCGTGTACAAATCCGTAGAGAAACCGTTGTGCA  
ACTTCCTTAAAACCGCCGGCCCGTTATTCAGTCAGAAATCCTTTACTCCAGTGGTCCAG  
TTCAAAGATATACCGATAGATAAGCAGAAATCGGCGGCGGCCGAGTACGAGAGCACGG  
AGGTGAACAGGCTTGGCTCGACCCTAACCCCGTCCGAGACCAGCATCGACTTCTCCGT  
GAAGTCGGGCAAAGACGTGGATTATTTACGAGGAAGAGGGCGCAAAAGTATACGGT  
TGGGAGCGAGGAGCGTCAACAAGTGGACGCGTCACAGCACAAACAGGGCCCAGTCCC  
AAGTTTATTTCGGGGGCCGGATCGTCAACCTCGTCGACCAGCGGGCCTAGACAACAATT  
GGCAACAACCG

>novel\_circ\_001483

AATTATAGAAGTGATATATATCTTAATTGTCGAAACCTACACAACGAATCGCGCCACGTA  
TGTATGCTTATATATATATATATATATATATATATATATATATATATATATACGTTG  
GTAATCTTAATTTCTTTCTTCTTCTTCGTTTCTTAACCACGAACGAAATTGACGAAAG  
GGAAATAAACATTGTGGAAATATATAATCG

>novel\_circ\_001484

ACCCCGAGGGAGGACAGGGCAGCGTCGAGTCCTGGTAATCAGAATAATCACACACCC  
ACACCATCCCCGTCACCGGTCGGCGATGCACCCGTTGGCAGGGCTCTTATGGAGGCTG

CGCTTCAGCAAGCCACTTCCGGATCTCAGCCACCTCTGGTGGTGACACCGCCTGGTTA  
CTGGGTCGACGGTACCGATCATCGACACGCCCTGGACTCGGCTGGCAGGGCGTTACTT  
CCGGCCCAGCCTGCATGGCAACCGAGGATAGACCAAGACGACACGGCCAAGTGTTAC  
AGGCGATTTTTCTGTCGGCAGG

>novel\_circ\_001485

ACGGAAGTAAGACAGCCGAAGATAATTAGATAAGTTTTCGATGACTAACTACTGGTGGCT  
AAGGTGGATATTACAGCGAAGATAAGATCTTTGCGAATCGTGCAACTCTTTAATTGCAG  
AAGTAATTACTGCATACCATTCAAGTGAATAACGATGACGACCTTAGACTCACAGACCG  
ATAAACTTTAAGCAATCTTGATAAGCTTTCTAACACGGAGCTAGCTGAAATTCCATCC  
GATCATGGACTTCCTGTTGGAATAAGCCCGTTGGAATCTCGGGTAGCCGGACATCCGTC  
GTTAGACATCGAACGGCAGACGATTGGCATGTTACGTAGATCAGACGGCCGTGTATATA  
AACCTGTTGTTAAACCGTTACTTGGGAAAAGAGAAATCTCGTTTTACGAAAATTTACA  
AACATCTCAAGATCCTGTTATGTTACAATTGAAAAATTATGTTCCAAGATATTACGGCAC  
GACAGAGTTGCAAATTTTTGGCAGACGAGTAACATTCCTTACGCTGAAAGATATTACCG  
ATGGTATGGCGGAACCGTGCGTGATGGATATAAAAATAGGTAGACGAACGTGGGACCC  
TTTAGCCACGCCGGAGAAAAAGGCAACCGAAGAATTAATAACGCCGAGTCTAAACG  
CACTTATGGATTCTGTATAACCGGATTTCAAGTATATTGCGTTTCGTCCGGCCGATTAAA  
ACAATTTGGCAAACATTACGGCAAGACTCTCGATGCTAAAGGTGTCGTGGAAG

>novel\_circ\_001486

GTAGCATGGTTGCGTGTGGATACACAACTATTCTAACGATAGCGAATCATGTGATAAC  
AAAGAATCATAGAATCGGAGTAACGCATACCGAACGCAAGACATGGCATTACATATAC  
GCGATGTGACCGAATCCGATCGAGGTGCTTATATGTGCCAGATAAATACCGATCCGATG  
AAGAGTCAAACCGGTTATTTGGATGTCGTAGTTCCGCCCCGATATTTAGATTATATGACA  
AGCACGGACATGATAATCAGAGAAGGCAGCAATGTGACATTACGTTGTGCTGCTAAAG  
GATCTCCAACACCAAGTATTACATGGAGGCGAGAAGGTGGAGAAAGTATATTTCTCGA  
GAATGGAGAAGAAG

>novel\_circ\_001488

TGAAAATTGTGCGAGGGTTCGATCTTCAATATCACTAAGATAAATCGATTGCAGATGGGT  
GCGTATTTGTGCATAGCTTCGAACGGTATACCACCTACCGTCAGTAAAAGAATAATGCTT  
ACGGTACAATTTAGTCCAATGATTTCAATTCAAAATCAATTAGTCGGGGGCACAAGAGGG  
ACAAAGAATGACTTTGGAATGTAACCTCGGAAGCGTTTCCACAATTGATCAATTATTGGA  
CAAAGGAAAACAACGAAATTATAGAAAATG

>novel\_circ\_001489

ATCTTGATTTGAGAAAAATGGCAAACGAAAGTTCTTTCACTTTTCTGTTAGAAGATTCTG  
TTCAGCGACAATGATAAAAGTATGACCGAAGATTGTTTCGTCGAAATTAAAAGATGCTTT  
GGAGAGCCTTGTTTCAGAAATACGACGGGGAATTATTGCAACGGACACTGGAACAATCT  
TTGTCCTCCTGCTCGGATAATTTATTAGATGAGAAAATTTTCAACGAAATTTTTCCTCTC  
GCCCATGATCTTCTATCCAAGACGTTGAAGCAGATCGGCGAAATGATAAACAGAAACG  
AAGACACGGAGCGAGACACGAAACGAGAGCTGTTTCGTTTGCCACGAATTGTTAAAAA  
TATGGGAAAAATCTATGGAACGTGTGTCGAAACTTCAGAGAACGTCTGCCACGGATCT

TAAATCCATATTGGAGAACGTACTCGTCACGGTTGAATTAATATTTCAACACTGTAGAG  
GAAGTAAAAAATTATACGGTGTGTTTTATTCGATAAAGTATCGGAGGAATTGACGAATCTC  
TTTCGTAAAGCAAAAACGATCTTGAATCTATTCTTGGCCACTTTGGACGGTGTAAATAGC  
CTTCGACACGGACACGGAATCGGAACGTGTTGGTAAAAG

>novel\_circ\_001490

ATGCAGTTTGGGATTACTGTTCGATCGTAACTTTTACGGCGCTAGTAGCGATCGCCTCGA  
CGACGACAGTCCATCAATTCGATATTTACGGCGAGTAGAAATTTTATAGTAGCAATATCA  
CGAATAACAATGAATGAATATTTATTAAGCTGTGTTTAAATATATTGCGCAATATTCTACCG  
TGTCGATAATTTGGAAATTTTCCGAAAAATCTCGACGTGTAAATTTTGCATTCTTTTA  
AAATTATGAATTTTAATTAATCAATAATCAAATTTTACCAAATTTCACTGTAAAGAATTTG  
GCCTTCAATTGTGCGCAAAAATTCTCAAAAATTTCCCCTTTGAACTTTGCAAAGTTCAAG  
GAACATCTCTCTGCCACACGTGTTGTGGCAAAATCAATTTTTCGATCGATGAAATAAA  
TAAAAATAACAAAAAGAAAAAAGAGAAAAATGTTACGCAACGTGGAAAGAAACGT  
AACACGTGTTACAATTTTCGAGGGCAACGATCGAAGACAATAGTGAGATTCCTCTCACG  
AAAATCGATGCTTCTTGTTGTTATTGTTGTTGTTGATCGCGATGATGTTGCATTTAATTAA  
TAAAGCAACGATGTAATCGTCCTTTGTGTGCGGTGCTAACATGCTAATTAATAATCTTTA  
CGATCAAGAAAAAAAAAAAAAGAGAAGAAAGATAGTAAACAATTAAAAAAAAATTCA  
AAATAACAAATTTATTTTCGCATTAAACGAGTGTGTTTTTTTTCTTCTTCTCCAAAGTGTT  
GAGGATATCGTATATTGTAAATTTGTTTTTTTTTTTCCATCCACAGATTATCTGTACGGGA  
TAGATCACGATTTACAGGCAAGAGCACGTGCAGGGATCGAGGCCGAAAGATTACCTA  
TCAGACGAAGGCTAG

>novel\_circ\_001491

ATGGCAAACCTATGTTACGACAAGGAGATACTGGAGATTGGATTGGGACATTTGAAGG  
ACATAAAGGAGCAGTGTGGGGTGTTGCATTAAATCCTCAGGCTACGAGAGCTGCTTCA  
GGTGCTGCAGATTTTAATGCTAAAGTTTGGGATGCGATAAAAGGAGAAGAAATTCATTC  
GTTCCAACATAAACATATTGTTAAATCTGTCAATTTTAGTACAGATTCTAATTATTTGTGC  
ACTGGCTCCAATGAGAACTTGTACGAATTTACGATCTTAACAAACCGGATGCAGCAC  
CACAAGTTTTCTCAGGTCATAAAAATGGTATCAGACATGTTACCTTTTTCAATAATAATA  
CTGCATTAATTACTTGTGGCGATGATAAAACATTAAGAGTTTGGGATAGGAATAGCGGC  
CAAGAAGTCAAAAGGTTAGATTTTCCGGCAATTCCAAATCCATGGAAGTATCAAGAG  
ATGGAAATATCATTACCACAACCTCATTCCAACATAGTTACTTTTTGGAATAGTAGAGAAT  
TAACCAAATTACGCGAATACACTGCACCAACACAAATGAATAGTGCCAGTTTGCATCCA  
GATTGTAGTATTTTTGTATGTGGAGGAGAAGATTTAAAAATGTACAAGTTCGATTACACT  
ACGGGCGCGGAGATTGAATCATTTAAAGGACACTTTGGACCCGTGCACTGTGTACGTT  
TTTCACCGGATGGTGAATTATATGCTAGTGTTTACAGAGGATGGTACATTGAGATTATGGC  
AAACAACCTGTTGGCAAACTTATGGTCTCTGGCGATGTATAGAACAAACACCTGCAAT  
ACAAGAAAATACTACTGTGCTTAATAATAAACAAGAAGTTCCTGCCAGTTAAAGATCTG  
ATGATTCATAAATAATGTATTTTAATACCTTCCAAAAGAGAAAAAAGAGAAGAATACT  
TCATCGAGAGATGTACGTATTATATATAAATGATAAATCACGAATTTTCATAGCAATTTGT  
ATCGTTGAAATTTGTATTTAATCGGCTGATATCTCTCATATGTTTTGTACATATATCAGATT  
TCTATAACGTGTCTTGAATCAGCCTAAATAATCGCGATATTCCGGGAAAAGCAATTTTCAT  
TCGTAGTTTAATAAGCAATGGAAGTCTGGGACGCCGTTTACTATTTATTGTAGAAAAGA



AAAAAAAAAGAAATATTAACATTTATTAACATTATACATGTCACTATTATACTACAAAATT  
AGATAGAGGTGTAATGAGAAAAAGAAAGACAATTCAGAATTAAATTTTGTGTTTCGCAT  
TTGTTATTTTCGCGTTGTAATATTACTATACAAGTATAAAAAGGATTTATTTCGGGCCACCA  
CTAGGCGCAACTTTTTTCAATATACATATCACTCATTTCGCCTATTATTATTATTCACATTTT  
TATTCCTTTTGTCTAACAAACGTCACAATACCGTGACAATTTATTAAGTCCTTTTTCCT  
CACACAGCAATTACGTGCTACGAGATCACTGTACAATTTTTCCTTCAAACCTGGCAATGA  
CAGCTTTATACAAGTAGTATATCATGTACTGACCTCTTTTGACTTTCCTTATTCCAGTACA  
CCTTCTTACGTATATATATATATATACGCATATATATATATATATATAAAAACATAAATT  
AAATACTTCTTATAATCTACAAAATAGTACTAAACATAACAAGAAAAAAAAAAAAAGAA  
AAAGAGAGAGGTATTTCGTTACAAAATGAAACATTTAAAACATTTCCAGTCGAGTATATA  
ATACATGAGCGAATCTTGATTACTTCTTGACCTCTCTTCATAAAAACGATTTCTATCAAAA  
TGCACGAGTTTTGAGACGCGTGCATAACACATTCACCGTGATTCTTGACTCTCTTACAA  
AAAAATTGTTCAACCTTTTACGATGAGTGCAGCTCGTTAAAAAAAACCTAACATCACTG  
TATGATCTCTCGGAAGGAAGACAGTGATTCTCTTGCGTGTGATAGTTAGTAAGCAACCA  
GTTATAGGAGAGAAGTCTTTGTTATAACATTTTTTTTTTCTTCCACCGCTCAACCTATGAA  
TTGCGACAGATCGGGCAACTTGAATCCGTTGAACGAAACTGGCGTTGGCGCGCTTCTC  
AAACTATTTCTGTGCGACACGAAACCAGGGAAACTGGTCGGCGTGGTAAACTGTTGA  
AGTCTCGAGGAAGCTTCCGTCGCCGCCAAAACGAAACCGCACTGAGCCGTGCACACG  
TCGTCGCGTAGAATCGCCTCGCGAGATGCCTCGCGTAGAAGCTGATTGCAGTCGGTAAT  
CCTCAGAGAAGCGCATTGAGTCTGAAAACAGAAACGAATTGCAACTTGAATTCATTCC  
ATTAACGTGTGTAAACGTCAAAAACAAGTACTTTCCAGAATAGGAAAATAAATATCCAA  
TTTCATAATAAGTATTCGATTTAGAATTTAAAAAGAATTAAATACGTACGCCTTCGGCGG  
TGCAAACGCAGCTGGTGCAAGGCGTAGGGAAGCCAGACTCTCCGAGAGCAACGTTTC  
TTCTCCGATCTGGCAACCGTGCCTCGTTTTCTCTCCACGCAGCGAGATCCATTTGCGGC  
ATCGAGCCGCAAGGGACTCGAGGATTGAGAAAATTGCTCGGCAAGTCGAACGCCGCC  
CTCTGCATGTCGTTTTGATTGTCCATGTTCTCGCACATAACCTTCGACAACGTCGATTTA  
CGAATCTCTGCGAGCTGGTGCTCGGTGAAGCGGATATTCGGGTCTGCGGTCTCGTACC  
AGAATCTATCGCACTTCCTCGCCTGCCTGAATTGTATCGCGATTATACAAGCGAACGTG  
GGCCCCACCAATCCGCCTTGAAGGGGTCTCTCGCTCATTCCGCCTGGGAACAAGTCGA  
TGTCGTCCACGGAGGCGTAGATGCGTTTCATCCGAGCTATCACCTCTGGCGCCATCTCT  
CGCGACAAATCTTCGAAAGTGGTCGCTCTCTTCAGATTACACAGAGCCCTGTAATTATT  
GTACGACGGTATACCGTGATCCCTGGCACGATGAACGTTGAGAGCGACCAGATCGATG  
CCAGAGTACGGTATTCCTCGGATCTCGAACAGGTGATTGGTCACCTCGCCGGTTATAAA  
TTGATCCAAAGTCTCCATAGGTGTGCGGACCAATCCGCGCGTCATTTCTGCCATCATGT  
TCGACTGATAGAGCACGTCCGGGTCTGAAGAAGCCATCTCTGAGCAAGATGGACGGTTC  
CATGTTCTGATAGTTGCGATCCATTCTCGGCAGATGGGGCCTCAGTAACGAGTGACCGA  
TCCTGTACGCCGCGGACGCGAATTCGGTGAGCACGCTGGGATTGCAAGTGGGGGAATA  
TTCTTGTAATAGCCTTGCGGCAACAGTTTCAATCCGTAAAGCGTGACGGCGTTCCAGC  
CGAGTATCCGAGGTAGGAATTCGTTGTACGTGATGTGCTGTAGCATCCCGCTGATTATTC  
GTCGAGATTGTTGGAACAGTTTCTCGCCGTCCCAGTGAGGATTGATCTGCCTCAATCCC  
TCCACGATCCTGTTATGCTCGCGCACCCACATGGTATGCATCACGGTTAATCCAGGCTG  
CTCGGAGGCGCGGCCGTCTCCGCCGATAAAGCAGTAACCTGATTTAGCTTTGCACTCG  
GGATGCGTGGGCGATTGAGGCAGGAGATCCTTGGCCCCCTCTGTGCGGACTTTGGGTGA  
TGTTTCATGCGACCGTTGAAGCCACGCAGTATGTTGCAGATGCAAGTGTTCTCTCCATAC

ACTACCGATCCGTCGAGAAAAGCGGTGTTCTGATTGATTTGTTCCCTCGGTCCGAGGTG  
TTGTTGGCCAGGCAGCGACCTCATGGACGGGAAACACATTTCGCGCGCCAGACGTTACG  
TTCACGGTGGGATAGTAATGGTCGCCAGGGGGGACGGGGAAGGGATTACACTCGGGAT  
GAACCGTTCTGGGCGAATCGCAAGAGCGACAGCTGGGTATAGACTCGGCGAAACCTTT  
GTGAATGGGCGTCATGGTGAGGTCGTGGTCGAGAAATTGAGCGAACTGCATTACCATC  
AGAGTGATCGATTGTGCAAGTTGGAGATGTCGGGATGAATCACCGTGGAGATTACTC  
GGGGATTTCGGTAGAGGCACTCCCGTCACCGAGGTGCTTCTCGGCTTCGACACTCCGTC  
TTCGTAGACGGGAGGCAGCAATCTGGCGAATGTCGTCAACGATTTACCCAAATTGGGA  
TTGCGTAAATTATTGCAGTGGCCGGAAGGGTTCTGTACGGAGAGGTTGGGTCGCAAG  
GGCTATCGTCCACGGGGCACTCGACTTCGTCTGTGATTTCGTAGGCTTCTTCTGGGACAG  
AAATCCGGAGATATCGACGTTTTGCAGCAGATCTGAGAAGTCGTTGTTGGGAAAGCCC  
AGTATATTGTCCGTGGTGTCTGAAGATCTGTCTGTTTCTTCCGCTTCAGCCCGTGTATCCCG  
TTCAGAATTCGTTGGTGGCCAACTCGTACATGATGGAGGAGTTTGCCAATAGGAGGG  
CATCTCTGTTGGCTTTCGAGAAGCTGGCAGCCGTCCCGGCTGGCGATTTTCGGATCCGCT  
ATTCTCTGCTGCAGCCACGAATTGTACTCCAGTTGTTTCCTCTCGATCAAATCTGCCTCA  
GCTTTCTTCACGGCTGCCGCTATTAAACTCGGGCTGAGTTCCGGGATGAACTCGGGGAT  
CACTGATCTGGTTCCAATCGCTACCTCCTTGGCGGGCTCTGGAAGTGGCTCTTCTCGCC  
AAGGAGCGATGTCGAGTACGCTGTGCTGGTCGCAATTGATCCTCGCGTTCAGATACGG  
GTCCTGCTGTATGAACGCTTTCGGTTGAATCTTGTCGATCTTCGTGTTGCCGCACAGGA  
TCCCGGCCAGAGAACTTTTCTAATTTTCGGCCAGTTGAGTCGGATTCAATCCGGACGG  
CGGGATGTCGTTCTCGTACCAGAATCGATCGGAGTTTCTCGTCTTGATGAACTGCCTCT  
TGAGAAGGCATTCGAACGTCGGACCTACCGTTCCACCCCTTCTAGGAATCTCTAAAATT  
CCACCGAGCAGCAAATCTACGTCTTCCACCCGCGAGTATACGGATTCCAACAGCCTCG  
CGTGTACCGGGTGCATTAGATGCTCCAAATCCATGAAATTTTGGATCTATGGAAAAAAA  
AAACAAAAGCTACGTTTTAGAATATATCGAAGAACGAAATGAATTTCTTAAATACATTAT  
GCAGTAGAAAAAAGAATTTTATACAAATGCAAATTAAACTGCACAAACGTACGGTCA  
CATTGCGTCCAGAACAATCGGCTACGAACTCGACGTATCCGGGGATCCCATGATCACG  
GCCACGTGTATAAAGCGCGCGTTTCGCGTCGACTCTCGATTTCGAAAGCGGATTGGCCG  
AGATCGAGGCTCACGCGATTGGCCGAGGCGATCACGTGGTCCTCCAAGCACGTGGCGT  
TGTCGATTCTGTGGCTGCGCAGCGACGTCAGAGCGCGCAGAGCCGCCAGCGCGACAG  
CATCGTACGTCCCTCCACGTTTCGAGGACGAGTAACCGTTGTAGAACCCGCTCGAAAC  
GGGCATCAATTCCGGATCCGTTTCGAGCACCCCTCCCCGAGAATACTCGGTACGTATTCTG  
TCAAAGTGACGTGTTGAATTTGCGCCATCACCAATCGTCGAGCCTCCAAGAACAACTT  
AGTGTCTGCCAATGCTCGTTGGCGTCGGCCAACGCCTCGGCCAATCGATTGTGCTCG  
CTCAAAAAGGCGGGCTACACCATTTCAAGCGGCTTGTCCAAGCTGCTGTTGCACACTT  
GGCAGGCAGAAACGTCGACCCTTCCTCGATTGTACGTCCTGATTTCGGTGCAGCTGTTT  
GTCGGTGGATCCGTAAATGTGGGAACCGTCCAAATATGCCGACGCACCGTTTCATTTGTT  
CCCTGCTTTCGAAATTACACTTGTGCACAGTGAGAGTCGGCACGGACCGCCAATAACC  
TATACATCCGTCTTGCTCGTCGCGGCTGTCGTAACATTCTGGATGCCTCGCTTTCCTAT  
GGTGCAACATAGGTCCAGTTTTTCGGGATGGATAGACGACGGACGCGATGTCTGTTGAGT  
ATTAGCTCGGACCATATCCCGGATAAGCTGGTCAGACCCTCGTGTGCCTCCGGAGTGGG  
GCGTAGATGGTTGAGCAGTGAGGTCACCACTTTCGTAGGTGTCTGGAAGCACGTGATTT  
CCGACCGACTGGCGAGGACTAGCGACATCTGGTGACAATGAAACGTAACCGCGTGTTT  
AGACGTGAAATTATCGTCTCGACGCGATGGTCGATATAGAAGAGGTTAGTTTCGTAAGGG

AAAGAAAAAAAAAATTGTAAATCGTTATCCGAGAAGCGTTTAATCGAAATGATTAATTGG  
AAATATTATTAATAATTCGTATTTAAGTGATATGGACGTGTAATGATAATTCGTGTAAAAT  
TTTTCAAACAACAATCGCGTCAATTACGAGCGAATTTCTCGAGTTACGAAAGAGTACA  
ACAGAGATATTATTCTTCAAATTGCGCTTGTATTCGTAAATAATTTTTTTCCTTATTATATA  
ATAAAGCTGCGGTTTCTACACTCTTACTTCACGAGGGTGTACGATGTAAATGAGATTAA  
ATCGTTGCACGTAGTAAATTGATAATATCTGTGTCAAATTAGACGTTACCTAACACAGTT  
TATTATTCTCGGTTACATTACACGGAATTTGATTTTTACGCTACGCGCACGTGAATCCC  
TATAGATTTTAACGCGACAAATTTTATCAAATTAGCGTAATTGTACCTTTCCTTCTGCTTT  
TGACAGCGAGAGACGAGAAATTGTACGTAATTATGAAACGAACGTAATCGAAGATTGG  
ATGGAGAACAGGTTATAAATATTATAATAAATCGTACTTTCATCTTTTATTATTACAGTGT  
ATTATAAACTTTCTTCGCTAAATACAAGGAAAAATTTTAAAACAAAAATACCAAAGT  
ATAGTAATTGTAAAGTACAAATTTTTTCTTCTCAAAAAAGAATATAAATAAATAATA  
TCAACGAGGAAAAGAAAGGATCGAGTAATGGAGATAGGTCAAATTAATCGATCTCTC  
GTTTCGATTAAACGTATAATCAATATCTAAATTTTTTTTCGACATCATCCATAAAATGACT  
TTCTACTTCGATGTAATTATATCGCACGTGCATACACCTGTGCTTGATCCTCTGCATCCCA  
GTTAGAGATAGTGAAATTTATTACGCACAACCTTCTAGATCGAGGTGGTTATTCATCTTC  
CGATTACGTCCAACATTGAAACCGAATAACGTTGGTTAGAAATCGAAAGTCTTCCGTCA  
TTATTGTTACCACGGATGCCATAAGCACGTTCTGCGGTTTTACGCATGTTTCTATCAATG  
TATCCTCGTTTAAAGTTAAACAAACGAATTAAACGAGCGAATTGTTATTCGATTAAAATT  
AAAAAAGAACTCGTAAAAATTTCGAATTCGAATATTTGTTATATAAAAAGTTACATTT  
CATTCGATTTCAATTAAATAATTCGGATTATTTATACCATTTTGAGTTTCGTTTCTTTTTTT  
TCCAACAAGACGTCACCGACAAGCGGCGAAAAGAGAACCTAACCTAGTCTCGCGACG  
CGAGATTCTGTGTCATGGTTACTCAACCGGTAAAGTAGATTGACATCACGTGGTTTTTA  
CGACTCGCGCCTATATTCACTGTACGATGGTGTGCATACGGAAGGATTTATGACGAG  
GATGGTACGGATATTCGTCCAACAATGAAAAACGAGCGAAAAAATATTTATAATAGGAT  
CCGTCTCGTCCCTAATAAGATTGATTCATGCGCATGTAGATAAGCTTGCAGCATTGGA  
GCGGTATTTAAATTAATATTGCCATAAATGTATAATACCTTGTTCCCTCTGACTGTCATTG  
GAATTGGAATTGATAATTCTCTTTTTTAAATTTTTTAAAGCTATCGTAATAGTACACATAT  
ATATACTCGAATTCAACTAATTGTCACACGATAACAAATTCCATTTCTACTTTTTTCTTGC  
AAATATAATGCAATGGATGTAATCAGAGTATAAAGATTTCGTAACCTATATTTATAGAACAC  
TTATTATTATTTTATTTTCTTACTACTATTTTTGTAGCATTTTCGATATTAACAATTCCAA  
AACTGGAAGATATTCATTTATGAGTAAAATTGAACTACGATTAAATTATGGACGTGCAA  
GGATGTTGTTATATAAATCTAAAGAACGAATCAATGGTATGTTGCGCTCAAACGAGATA  
ATATCGAGCTATTTAGAAAAGCGAATTTGACAAGTTTCGATTATTATTCCAGTCAACGTCG  
ACATTTTAGCCACTCATCAGAGACTTTCAATTGTGTGCGACGCGACGAAAATACGACGA  
CGATCGAGATAATTTGGGTCAACGTAGTCGAAAGGCAACGTTGGCGCAGGGAGCCACT  
GGTAATGGAGGAACACCTGAATCACTTTCATCGCCTCTTTTCACTTTCATATTTCCGTCT  
TCATTTTTTTCTTCTTTCTTTTGCACAGGTGTCAATCGCCTTCCGCCTTACCTTTCGCAAT  
ACACAGAGCAGGCACGCTTCCTGATAAAGCGGCACAATCTCCAGTTGTTTAATTAACG  
CTTAATCCTGATCTTCGTGCTTCATAGATTCCAATTCGACGTGACAGATATTCGCAGCAA  
ATATTTCTGAGAGATAATTCTATATATTTGTGGATTAAATTGAAGTTTAAATAAATATTTAT  
ATTTTTTTCATTATAAGATCGATCGAAATTATTATTTAAAATTAGAAACGATACACAGAG  
GTTTTTATGTAGATAATTAAATTATTATTCTTACTGAACAATATTAATAATATAGTGCATAG  
AGTTCTATTTATTTTAGAGATAGTATATTACTATAAAATAAGCAATTGAGAGTAACTGATG

TTATTATACTAAATAAAACAATAAGAATTTGAATGTAATTAATTTTTCTATGTAGTTTACATA  
TATTTTTTTTTATACATTTTCAGTTATGTTTTTTATGTATAATCTTCTATAGAATTATAGTTTTTC  
TAATGTATCTCTAATACAAATCTCGGTACAAATGCAATTGTTGAAAACGTACAGCAAATA  
AAGGAAATATGATAAATAATTAGAATATCGCCAATTCCTAAAAGTGGCGTCAAATTTTCA  
GAATTTTCAGAAGTTCTTAAAAATGACATCAAATCCTAGATTTTCTGAAAAATGTTCAA  
ATTAATTAAATAAAATAAATACTTGCATTTTTTACTACAAAAATCACACGACTCATT  
AATTCGACATTGAACAGAAAACAGATCCAGGAAAAGCTATGTAATTCCAACCAATTCT  
ACAATCTTTCCTCTTTAAAAATGAGCATTGATTGAGCATTTTACGATATTTCTATCGAAAAT  
TATGCACTTTCAAAGATTAGTGATTCTCTCCTCAAAAATCCCTCGACTCATTTAATTCGT  
CATTGAACAGGAGAGAGTCCAAGGAAAACTATTGAATTCTACGTTATTCTACAATCCT  
TCCACTTTAAATGAGCTTTGGTTGAGCATTTTACGAAATTCCTATCGAAAGTTATGCAA  
TTTTAAAGATTAGTGATTCTCTCCTCAAAAATCCCTCTACTCATTTAATTCGTCATTGAA  
CAGGAGACAGTCCCAAGAAAACTATTGAATTCTACGCTATTCTACAGTGCTTGCCCTT  
TAAAATGAGCTTTGGTTGAGCATTCTACGAACTCTTATAGAAAGTTATGCAATTTCAA  
AAATTAGTGATTTTCTCCTCAAAAATCCCTCGAATCATTTAATTCGTCATTGAACAGGAA  
ACAGTCCCAAGAAAACTATTGAATTCTACGCTATTCTACAGTGCTTCCCCTTTAAAT  
GAGCTTTGGTTGAGCATTTTACGAAATTCCTATCGAAAGTTATGCAATTTCAAAAATTA  
GTGATTCTCTCCTCAAAAATCCATCGAATCTTTTAATTCGTCATTGAACAGGAGACAGT  
CCCCGAAAAATTTTAGGATTCTACACTATTCTACAATTCTTCCCCTTTAAATGAGCTT  
TGTTTGAGCATTCTACGAAATTTCTATCGAAAATTATGCAATTTCAAAGATTAGTGATTT  
TCTCCTCAAAAATCCCTCGAATCATTTAATTCGTCATTGAACAGGAGACAGTCCCCGGA  
AAAATATTAGGACTCTACGCTATTCTACAATGCGTCCACTTTAAATGAGCTTTGGTTGA  
ACATTCTACGAAATTCCTAACGAAAGTTATGCAATTTTAAAGAATAGTGATTCTCTCCTC  
AAAAATCCCTCTACTCATTTAATTCGTCATTGAACAGGAGACAGTCCCAAGAAAACTA  
TTGAATTCTACGCTATTCTACAGTGCTTGCCCTTTAAATGAGCTTTGGTTGAGCATTCT  
ACGAAACTCTTATAGAAAGTTATGCAATTTCAAAAATTAGTGATTTTCTCCTCAAAAAT  
CCCTCGACTCATTTAATTCGTCATTGAACAGGAAACAGTCCCAAGAAAACTATTGAAT  
TCTACGCTATTCTACAGTGCTTCCCCTTTAAATGAGCTTTGGTTGAGCATTTTACGAAA  
TTCCTATCGAAAGTTATGCAATTTCAAAAATTAGTGATTCTCCCCTCAAAAATCCCTCG  
AATCATTTAATGCGTCATTGAATAGGAGACAGTCCCCGAAAAATTTTAGGATTCTACA  
CTATTCTACAATTCTTCCCCTTTAAATGAGCTTTGTTTGAGCATTCTACGAAATTTCTAT  
CGAAAATTATGCACTTTCAAAGATTAGTGATTCTCTCCTCAAAAATCCCTCGACTCATT  
AATTCGTCATTGAACAGGAGAGAGTCCAAGGAAAACTATTGAATTCTACGCTATTCTA  
CAATGCGTCCCCTTTAAATGAGCTTTGGTTGAACATTCTACGAAATTCCTAACGAAAG  
TTATGCAATTTTAAAGATTAGTGATTCTCTCCTCAAAAATCGGTGCAATCATTTAATTCG  
TCATTGAACAGGAGACAGTCCCAAGAAAACTATTGAATTCTACGCTATTCTATAGTGC  
TTGCCCTTTAAATGAGCTTTGGTTGAGCATTCTACGAAACTCTTATAGAAAGTTATGC  
AATTTCAAAAATTAGTGATTTTCTCCTCAAAAATCCCTCGAATCATTTAATTCGTCATTG  
AACAGGAAACAGTCCCAAGAAAACTATTGAATTCTACGCTATTCTACAATGCGTCCCC  
TTTAAATGAGCTTTGGTTGAGCATTCTACGAAATTCCTATCGAAAATTATGCACTTTCA  
AAGATTAGTGATTCTCTCCTCAAAAATCCCTCTACTCATTTAATTCGTCATTGAACAGGA  
GACAGACCCAAGAAAACTATTGAATTCTACGCTATTCTACAGTGCTTCCCCTTTAAAA  
TGAGCTTTGGTTGAGCATTTTACGAAATTCCTATCGAAAGTTATGCAATTTCAAAAATTA  
GTGATTCTCTCCTCAAAAATCCATCGAATCATTTAATTCGTCATTGAACACGAGACAGT

CCCCGAAAAATTTTAGGATTCTACGCTATTCTACAGTGCTTGCCCTTTAAAATGAGCTT  
TGGTTGAGCATTCTACGAAACTCTTATAGAAAGTTATGCAATTTCAAAAATTAGTGATT  
TCTCCTCAAAAATCCCTCGACTCATTTAATTCGTCATTGAACAGGAAACAGTCCCAAGA  
AAAATATTGAATTCTACGCTATTCTACAGTGCTTGCCCTTTAAAATGAGCTTTGGTTGA  
GCATTCTACGAAATTCCTATCGAAAGTTATGTAATTTCAAAGATTAGTGATTCTCCCCTC  
AAAAATCCCTCGAATCATTTAATGCGTCATTGAATAGGAGACAGTCCCCGAAAAAT  
TTAGGATTCTACACTATTCTATAATTCTTCCCCTTTAAAATGAGCTTTGTTTGAGCATTCT  
ACGAAATTTCTATCGAAAATTATGCAATTTCAAAAATTAGTGATTTTCTCCTCAAAAATC  
CCTCGACTCATTTAATTCGTCATTGAACAGGAGACAGTCCCAAGAAAAACTATTGAATT  
CTACGCTATTCTACAATGCGTCCCCTTTAAAATGAGCTTTGGTTGAGCATTCTACGAAAT  
TCCTATCGAAAGTTATGCAATTTCAAAAATTAGTGATTCTCTCCTCAAAAATCCATCGAA  
TCTTTTAATTCGTCATTGAACAGGAGACAGTCCCCGAAAAATTTTAGGATTCTACACT  
ATTCTACAATTCTTCCCCTTTAAAATGAGCTTTGTTTGAGCATTCTACGAAATTTCTATC  
GAAAATTATGCAATTTCAAAGATTAGTGATTTTCTCCTCAAAAATCCCTCGAATCATTTA  
ATTCGTCATTGAACAGGAGACAGTCCCCGAAAAATATTAGGACTCTACGCTATTCTAC  
AATGCGTCCACTTTAAAATGAGCTTTGGTTGAACATTCTACGAAATTCCTAACGAAAGT  
TATGCAATTTTAAAGAATAGTGATTCTCTCCTCAAAAATCCCTCTACTCATTTAATTCGTC  
ATTGAACAGGAGACAGTCCCAAGAAAAACTATTGAATTCTACGCTATTCTACAGTGCTT  
GCCCTTTAAAATGAGCTTTGGTTGAGCATTCTACGAAACTCTTATAGAAAGTTATGCAA  
TTTCAAAAATTAGTGATTTTCTGCTCAAAAATCCCTCGACTCATTTAATTCGTCATTGAA  
CAGGAAACAGTCCCAAGAAAAACTATTGAATTCTACGCTATTCTACAGTGTTTTCCCTT  
TAAAATGAGCTTTGGTTGAGCATTCTACGAAATTCCTATCGAAGGTTATGCAATTTCAA  
AGATTAGTGATTCTCTCCTCAAAAATCCCTCGAATCATTTAATGCGTCATTGAATAGGAG  
ACAGTCCCCGAAAAATTTTAGGATTCTACACTATTCTACAATTCTTCCCCTTTAAAATG  
AGCTTTGTTTGAGCATTCTACGAAATTTCTATCGAAAATTATGCAATTTCAAAGATTAGT  
GATTTTCTCCTCAAAAATCCCTCGACTCATTTAATTCGTCATTGAACAGGAGACAGTCC  
CAAGAAAAACTATTGAATTCTACGCTATTCTACAATGCGTCCCCTTTAAAATGAGCTTTG  
GTTGAACATTCTACGAAAATCCTAACGAAAGTTATGCAATTTTAAAGATTAGTGATTCTC  
TCCTCAAAAATCCCTCGAATCATTTAATTCGTCATTGAACAGGAGACAGTCCGCGGAA  
AAATATTAGGACTCTACGTTATTCTACAATCCTTCCACTTTAAAATGAGCTTTGGTTGAG  
CATTCTACGAAATTCCTATCGAAAATTATGCACCTTTCAAAGATTAGTGATTCTCTCCTCA  
AAAATCCCTCGACTCATTTAATTCGTCATTGAACAGGAGACACTCCCAAGAAAAACTAT  
TGAATTCTACGCTATTCTACAATCCTTCCCCTTTAAAATGAGCTTTGGTTGAGCATTCTA  
CGAAATTCCTATCGAAAGTTATGCAATTTCAAACATTAGTGATTCTCTTTTCAAAAATCG  
GTCGAATCATTTAATTCGTCATTGAACAGGAGACAGTCCCAAGAAAAACTATTGAATTC  
TACGCTATTCTACAGTGCTTCCCCTTTAAAATGAGCTTTGGTTGAGCATTTTACGAAATT  
CCTATCGAAAGTTATGCAATTTCAAAAATTAGTGATTCTCTCCTCAAAAATCCATCGAAT  
CATTTAATTCGTCATTGAACAGGAGACAGTCCCCGAAAAATTTTAGGATTCTACACTA  
TTCTACAATTCTTCCCCTTTAAAATGAGCTTTGTTTGAGCATTCTACGAAATTTCTATCG  
AAAATTATGCAATTTCAAAGATTAGTGATTTTCTCCTCAAAAATCCCTCGACTCATTAA  
TACGTCATTGAACAGGAAACAGTCCCAAGAAAAACTATTGAATTCTACGCTATTCTACA  
GTGCTTGCCCTTTAAAATGAGCTTTGGTTGAGCATTCTACGAAATTCCTATCGAAAGTTA  
TGTAATTTCAAAGATTAGTGATTCTCTCCTCAAAAATCGGTCTGAATCATTTAATTCGTCA  
TTGAACAGGAGACAGTCCCAAGAAAAACTATTGAATTCTACGCTATTCTACAGTGCTTC

CCCTTTAAAATGAGCTCTGTTTGAGCATTCTACGAAATTCCTAACGAAAGTTATGCAAT  
TTCAAAGATTAGTGATTCTCTCCTCAAAAATCCCTCGAATCATTTAATTCGTCATTGAAG  
AGGAAACAGTCCCAAGAAAACTATTGAATTCTACTCTATTCTACAGTGCTTCCCCTTT  
AAAATGAGCTTTGGTTGAACATTCTACGAAATTCCTAACGAAAGTTATGCAATTTCAA  
GATTAGTGATTCTCTCCTCAAAAATCGGTTCGTATCATTTAATTCGTCATTGAACAGGAGA  
CAGTCCCAAGAAAACTATTGAATTCTACGCTATTCTACAATGCGTCCCCTTTAAAATA  
AGCTATGGTTGAACATTCTACGAAATTCCTAACGAACGTTATGCAATTTCAAAAATTAG  
AGATTCTCTCCTCAAAAATCGGTTCGAATCATTTAATTCGTCATTGAACAGGAGACAGTT  
CCAAGAAAACTATTGAATTCTATGCTATTCTACAGTGCTTGGCCTTTAAAATGAGCTTT  
AGTTGAGCATTCTACGAAATTCCTATCGAAAATTATGCACTTTCAAAGATTAGTGATTCT  
CTCCTCAAAAATCCCTCTACTCATTTAATTCGTCATTGAACAGGAGACACTCCCAAGAA  
AACTATTGAATTCTACGCTATTCTACAATCCTTCCCCTTTAAAATGAGCTTTGGTTGAG  
CATTCTACGAAATTCCTATCGAAAGTTATGCAATTTCAAAGATTAGTGATTCTCTCCTCA  
AAAATCGGTTCGAATCATTTAATTCGTCATTGAACAGGAAACAGTCCCAAGAAAACTA  
TTGAATTCTACGCTATTCTACAATGCGTCCCCTTTAAAATGAGCTTTGGTTGAGCATTCT  
ACGAAATTCCTATCGAAGGTTATGCAATTTTAAAGATTAGTGATTCTCTCCTCAAAAATC  
CCTCTACTCATTTAATTCGTCATTGAACAGGAGACACTCCCAAGAAAACTATTGAATT  
CTACGCTATTCTACAATCCTTCCCCTTTAAAATGAGCTTTGGTTGAGCATTCTACGAAAT  
TCCTATCGAAAATTATGCAATTTCAAAGATTAGTGATTTTCTTCTCAAAAATCCCTCGAC  
TCATTTAATTCGTCATTGAACAGGAGACAGTCCTAGGAAAGACTATTGAATTCTACGCT  
ATTCTACAATGCTTCCCCTTTAAAATGAGCTTTGGTTGAGCATTCTACAAAATTCGTATC  
GAAAGTTATGCAATTTCAAAAATTAGTGATTCTCTCCTCAAAAATCGGTTCGAATCATTTA  
ATTCGTCATTGAACAGGAGACAGTTCCAAGAAAACTATTGAATTCTATGCTATTCTAC  
AGTGCTTGGCCTTTAAAATGAGCTTTGGTTGAGCATTCTACGAAATTCCTATCGAAAATT  
ATGCACTTTCAAAGATTAGTGATTCTCTCCTCAAAAATCCCTCTACTCATTTAATTCGTC  
ATTGAACAGGAGACACTCCCAAGAAAACTATTGAATTCTACGCTATTCTACAATCCTT  
CCCCTTTAAAATGAGCTTTGGTTGAGCATTCTACGAAATTCCTATCGAAAGTTATGCAAT  
TTCAAAGATTAGTGATTCTCTCCTCAAAAATCGGTTCGAATCATTTAATTCGTCATTGAAC  
AGGAGACAGTCCCCGAAAAATTTTAGGATTCTACACTATTCTACAATTCTTCCCCTTTA  
AAATGAGCTTTGTTTGAGCATTCTACGAAATTTCTATCGAAAATTATGCAATTTCAAAGA  
TTAGTGATTTTCTCCTCAAAAATCCCTCGACTCATTTAATACGTCATTGAACAGGAAAC  
AGTCCCAAGAAAACTATTGAATTCTACGCTATTCTACAGTGCTTGGCCTTTAAAATGA  
GCTTTGGTTGAGCATTCTACGAAATTCCTATCGAAAGTTATGTAATTTCAAAGATTAGTG  
ATTCTCTCCTCAAAAATCCCTCGAATCATTTAATTCGTCATTGAACAGGAGACAGTCCC  
CGAAAAATATTAGGACTCTACGTTATTCTACAATCCTTCCACTTTAAAATGAGCTTTGG  
TTGAGCATTCTACGAAATTCCTATCGAAAATTATGCACTTTCAAAGATTAGTGATTCTCT  
CCTCAAAAATCCCTCTACTCATTTAATTCGTCATTGAACAGGAGACACTCCCAAGAAAA  
ACTATTGAATTCTACGCTATTCTACAATCCTTCCCCTTTAAAATGAGCTTTGGTTGAGCA  
TTCTACGAAATTCCTATCGAAAGTTATGCAATTTCAAAGATTAGTGATTCTCTTTTCAA  
AATCGGTTCGAATCATTTAATTCGTCATTGAACAGGAGACAGTCCCAAGAAAACTATTG  
AATTCTACGCTATTCTACAGTGCTTCCCCTTTAAAATGAGCTTTGGTTGAGCATTTTACG  
AAATTCCTATCGAAAGTTATGCAATTTCAAAAATTAGTGATTCTCTCCTCAAAAATCCAT  
CGAATCATTTAATTCGTCATTGAACAGGAGACAGTCCCCGAAAAATTTTAGGATTCTA  
CACTATTCTACAATCCTTCCCCTTTAAAATGAGCTTTGTTTGAGCATTCTACGAAATTTCT

ATCGAAAATTATGCAATTTCAAAGATTAGTGATTTTCTCCTCAAAAATCCCTCGACTCAT  
TTAATACGTCATTGAACAGGAAACAGTCCCAAGAAAACTATTGAATTCTACGCTATTC  
TACAGTGCTTGCCCTTTAAAATGAGCTTTGGTTGAGCATTCTACGAAATTCCTATCGAA  
AGTTATGTAATTTCAAAGATTAGTGATTCTCTCCTCAAAAATCGGTGCAATCATTTAATT  
CGTCATTGAACAGGAGACAGTCCCAAGAAAACTATTGAATTCTACGCTATTCTACAGT  
GCTTCCCTTTAAAATGAGCTCTGTTTGAGCATTCTACGAAATTCCTAACGAAAGTTAT  
GCAATTTCAAAGATTAGTGATTCTCTCCTCAAAAATCCCTCGAATCATTTAATTCGTCAT  
TGAAGAGGAAACAGTCCCAAGAAAACTATTGAATTGTACTCTATTCTACAGTGCTTCC  
CCTTTAAAATGAGCTTTGGTTGAACATTCTACGAAATTCCTAACGAAAGTTATGCAATT  
TCAAAGATTAGTGATTCTCTCCTCAAAAATCGGTGCTATCATTTAATTCGTCATTGAACA  
GGAGACAGTCCCAAGAAAACTATTGAATTCTACGCTATTCTACAATGCGTCCCCTTTA  
AAATAAGCTATGGTTGAACATTCTACGAAATTCCTAACGAACGTTATGCAATTTCAAAA  
ATTAGAGATTCTCTCCTCAAAAATCGGTGCAATCATTTAATTCGTCATTGAACAGGAGA  
CAGTCCCAAGGAAAACTATTGAATTCTACGCTATTCTACAGTGCTTCCCTTTAAAATG  
AGCTTTGCTTGAGCATTCTACGAAATTCCTAACGAAAGTTATGCAATTTCAAAGATTAG  
TGATTCTCTCCTCAAAAATCCCTCGAATCATTTAATTCGTCATTGAACAGGAAACAGTC  
CCAAGAAAACTATTGAATTCTACGCTATTCTACAATGCGTCCCCTTTAAAATGAGCTTT  
GGTTGAGCATTCTACGAAATTCCTATCGAAAGTTATGCAATTTTAAAGATTAGTGATTCT  
CTCCTCAAAAATTCCTCTACTCATTTAATTCGTCATTGAACAGGAGACAGTCCCCGGAA  
AAATTTTAGGATTCTACACTATTCTACAATGCTTCCCCTTTAAAATGAGCTTTGGTTGAG  
CATTCTACAAAATTCGTATCGAAAGTTATGCAATTTCAAAAATTAGTGATTCTCTCCTCA  
AAAATCGGTGCAATCATTTAATTCGTCATTGAACAGGAGACAGTCCCCGGAAAAATTT  
AGGATTCTACGCTATTCTACAATGCGTCCCCTTTAAAATGAGCTTTGGTTGAACATTCTA  
CGAAATTCCTAACGAAAGTTATGCAATTTTAAAGATTAGTGATTCTCTCCTCAAAAATC  
GGTCGAATCATTTAATTCGTCATTGAACAGGAGACAGTCCCAAGAAAACTATTGAATT  
CTACGCTATTCTACAGTGCTTGCCCTTTAAAATGAGCTTTGGTTGAGCATTCTACGAAA  
CTCTTATAGAAAGTTATGCAATTTCAAAAATTAGTGATTTTCTCCTCAAAAATCCCTCGA  
ATCATTTAATTCGTCATTGAACAGGAAACAGTCCCAAGAAAACTATTGAATTCTACGC  
TATTCTACAATGCGTCCCCTTTAAAATGAGCTTTGGTTGAGCATTCTACGAAATTCCTAT  
CGAAAATTATGCACTTTCAAAGATTAGTGATTCTCTCCTCAAAAATCCCTCTACTCATTT  
AATTCGTCATTGAACAGGAGACAGTCCCAAGAAAACTATTGAATTCTACGCTATTCTA  
CAGTGCTTCCCTTTAAAATGAGCTTTGGTTGAGCATTTTACGAAATTCCTATCGAAAG  
TTATGCAATTTCAAAAATTAGTGATTCTCTCCTCAAAAATCCATCGAATCATTTAATTCG  
TCATTGAACACGAGACAGTCCCCGGAAAAATTTAGGATTCTACGCTATTCTACAGTGC  
TTGCCCTTTAAAATGAGCTTTGGTTGAGCATTCTACGAAACTCTTATAGAAAGTTATGC  
AATTTCAAAAATTAGTGATTTTCTCCTCAAAAATCCCTCGACTCATTTAATTCGTCATTG  
AACAGGAAACAGTCCCAAGAAAACTATTGAATTCTACGCTATTCTACAGTGCTTGCC  
CTTTAAAATGAGCTTTGGTTGAGCATTCTACGAAATTCCTATCGAAAGTTATGTAATTT  
AAAGATTAGTGATTCTCCCCTCAAAAATCCCTCGAATCATTTAATGCGTCATTGAATAG  
GAGACAGTCCCCGGAAAAATTTAGGATTCTACACTATTCTATAATTCTTCCCCTTTAAA  
ATGAGCTTTGTTTGAGCATTCTACGAAATTTCTATCGAAATTATGCAATTTCAAAAATT  
AGTGATTTTCTCCTCAAAAATCCCTCGACTCATTTAATTCGTCATTGAACAGGAGACAG  
TCCCAAGAAAACTATTGAATTCTACGCTATTCTACAATGCGTCCCCTTTAAAATGAGCT  
TTGGTTGAGCATTCTACGAAATTCCTATCGAAAGTTATGCAATTTCAAAAATTAGTGATTCT

[illegible]



[illegible]

[illegible]

[illegible]

[illegible]

NNNNNNNNNNNNNNNNNNNNNNNNNNNNNNNNNNNNNNNNNNNNNNNNNNNNNNNNNNNNNNNNNNNNNNNNNNNNNNNNNNNN  
NNNNNNNNNNNNNNNNNNNNCTTAGTGATTCTCTCCTCAAATCCCTCGAATCATTTAATTTCG  
TCATTGAACAGGAGACAGTCCCCGAAAACTATTGAATCAACGCTATTCTACAGTGCTTC  
CTTTAAAATGAGCTTTGGTTGAGCATTCTACAAATTCGTATCGAAAGTTATGCAATTTCA  
AAAATTAGTGATTCTCTCCTCAAAAATCGGT CGAATCATTTAATTTCGT CATTGAACAGG  
AGACAGTCCCCGGAAAAATTTTAGGAATTTTAGAAAATTAAATTAACAGTTGATCCTT  
TGACTACTCGATAAAAAATTTCAATTCTTGTTTTCTTCAAATAATTTACTGCCGAAACGTT  
CGAAAATAAAGAAATCGGTAATGGAATAGTATTTACAGAATTAGTATTTACAGAATCCTT  
GTTGAATGGGAATCAATAAAAAATTCAATAATCAGAAGCTAAAAATCAAAGCTAAATTT  
TTGGAAAACTTTATTTAGAGGCTACCAACTCGAATTTACTAGAATTTACTAGAAAATTA  
AAATTAACAGTTGATCCTTTGACTACTCGATACAAAATTTCAATTCTTGTTTTCTTCAAAT  
AATTTACTGCCGAAACGTT CGAAAATAAAGAAATCGGTAATGGAATAGTATTTACAGAA  
TTAGTATTTACAGAATCCTTGTTGAATGGGAATCAATAAAAAATTCAATAATCAGAAGCTA  
AAAATCAAAGCTAAATTTTTTGAAAAC TTTATTTAGAGGCTACCAACTCGAATTTACTA  
GAATTTACTAGAAAATTAAATTAACAGTTGATCCTTTGACTACTCGATACAAAATTTCA  
ATTCTTGTTTCTTCAAATAATTTATCGCCGAAACGTT CGAAAATAAAGAAATCGGTAATG  
GAATACCACGC GCAAACCAGCAGGTACTACCGTTACGGTTTCGATAGTGGCGAGGAAG  
TGGTAGGGCCTGCGGTGTGGCGCTTGCCAACGCACGGCCGCGTGGAAGGGGGATAGC

ACCGTTAATGGTCGCGGCGAGAAACCTTCCTCGTGGTTGAAATGCCGCCGCTGCTGCG  
CGGAAGGACGGCACGCCGACACTCCTTTTCTCGGCCATGAAAGTAAAAGTTCGCTCGT  
GGCGCTCCCAGCGGCGAGAAGAGGAAGGAAAATGGAGCAGGAAGGACGGACCGCTA  
TCTCCGCTCGCCACACGTTTCGCTCTCCTCCCGATACTTTTTTTATTATTCCCGGCCCGA  
CTTCCTCGTCTCTCTCTCCCTCGTTGATTCTTCCTTAAACGTTTGTTTGCCAAACTGATT  
TATTTGTTTGTTCCAACGAATTGACGAATGAAAGGTATAATAATAAGGTATAGTATAATTG  
AAGTTTAAACGTGTTTTGCGTTATGGATTAAAGACGTCGTCCCTTTGTTACGGTTTTCTT  
TTAGTATTCGCAGCAGAAGCGAGCGTTTCGAGAGAAATTTGCATTTTTCTGGGCATAAAT  
AAATTAACGAGGTAAACGATGGGTATGTCATTTTTTTTTTCATCGTAATGCGAAAAA  
AAATTTTTTCTCGTTAATTAACGATTTTAAATTTTATTGAAACACGGGGAAATAAATT  
TCAACGAATTTTCGATAATTTGCAATATGGATATGGATATAGGAAAAGAGAGATAAAGAT  
GGATGGTTTTTATCATTTCGTGACTATCGATTATATTTATTAATACTTAGAGTCATTAATTAC  
AATTTAAATATTCGATAATTCGACGAATACCAAAGTGACGATTTCGATTGGTAATGCGAAA  
TTTAAAAGACGTCGAGAAGACGTCTATCCTTTCTTTGTTTCGAAACAACATTCCAAAA  
AAGATAATCGCTTTTCGGATCCTTTCCACACAGAATTATACTCGAAAAAGCATAATAATA  
TAAATAAATTATTCGCCGTTTCTCCTTCCAACATGCTTCTTCTCTCCTCTCCTCTCGAA  
TAAATCTTTTCGAGGTTTCGTAACGAAGAAGAGAAATAGCTTCTCATAATTCCGATTCA  
CTTTCTACGCCACGGTTCAACCACATTCCCAATCGATTTCGGCGAAAGGTATCACGCGTT  
CGATAATTACGATTGTACGCTGCGGATCAATGATGAGCTTTTTCTTTTCAAATTTTCTT  
TTTTCTTTTGAAAGAAATAAAAAACATTGAGTTGTGAAAAATAATGCTACACTAACCG  
AACTAAATGAATATTATTTTTTTTTTCGAATACGTATGATACGATATAATATACGAAACATA  
ACCTAACTTTTTCTCTCTTAATAAATTTTATGCGAATCGATGATGAGCTTTTAATCTTTTC  
TTCAAATTTTCTTTTTTCTTTTGAAAGAAATAAAAAACATTGAATTGTGAAAAATAA  
TGCTACGCTAACCGAGCTAAATGAATATTATTTCTTTTTTCGAATACGTACAATACGATATA  
ATATACGAAACATAACCTAACTTTTTCTCTCTTAATAAATTTCAAGTATTATTCGAGATAC  
GCGGATCGATTATGAGCCTTTTCTTCTTTTCAAATTTTCTTTTTTCTTTTGAAAAGAAA  
AAAAGAACATTGAATTGTGAAAAATAATGCTACACTAACCGAGCTAAATGAATATTATT  
TTTTTTTCGAATACGTACGATACGATATATACGAAACATAACCTAACTTTTTCTCTCTTAAT  
AAATTTTACGCGAATCGATGATGAACTTTTAATCTTCTTCTTCAAATTTTCTTTTTTCTT  
TGAAAGAAATAAAAAACATTGAATTGTGAAAAATAATGCTACACTAACCGAGCTAAA  
TGAATATTATTTTTTTTCGAATACGTACGATATAACCTAACTTTTTCTCTCTTAATAAATTT  
TAAGTATTACTCGAGATACGCGGATCGATGATGAGCTTTTAATCTTCTCTTCAAAGTTTT  
CTTTTTTCTTTTGAAAGAAATAAAAAACATTGAATTGTGAAAAATAATGCTACATTAA  
CCGAGCTAAATGAATATTATTTTTTTTTTCGAATACGTACGATACGATATATACGAAACATAA  
CCTAACTTTTTCTCTCTTAATAAATTTTACGCGGATCGATGATGAGCTTTTAATCTTCTCT  
TCAAATTTTCTTTTTTCTTTTGAAAAATAAAAAATATTGAATTGTGAAAAATAATGCTA  
CACTAATCAAGGATGAATGTTATTTCTTTTTTCGAATACGTACGATACGATATATACGAAA  
CATAACCTAACTTTTTCTTCTTTCTAAATTTTAAGTATTACTCGAGATACGAGTTAAGTT  
AATTAATGAAACAAAATATTTGTATTATTAACGTAACAACGATTGTTTTTTCTTTT  
AAATTTAAATAATTATTTTTTTTTTCTTTCTAAATTTTAAGTATTACTCGAGATACGAGTTA  
AGTTAATTAATAATGAAACAAATATTTGTATTATTAACGTAACGATACAATTTCGTTTTTT  
CCTTTAAATTTAAATAATTATTTTTTTTTTTTTTCGTCAAAAAGTTGCAGTAACTCAACC  
GTGACGAGTTCCATATTATAAATTCAATGAAGCAAGAGCCGGCCTTCTTCCATATCTCCG  
GAGAGGAAAAAAAAAAAAAAAAAAGAAAAAAAAAAGAGAAGAATTCGGCGAGGAG

GAGAAGAGGCGGGGTAAAGGAATTAGGTAATTACATCGAGAAGCTAGCGAAACTGTC  
ACGTTACCTTGAATGAAAA

>novel\_circ\_001492

ATGGCAAACCTATGTTACGACAAGGAGATACTGGAGATTGGATTGGGACATTTGAAGG  
ACATAAAGGAGCAGTGTGGGGTGTTCATTAAATCCTCAGGCTACGAGAGCTGCTTCA  
GGTGCTGCAGATTTTAATGCTAAAGTTTGGGATGCGATAAAAGGAGAAGAAATTCATTC  
GTTCCAACATAAACATATTGTTAAATCTGTCAATTTTAGTACAGATTCTAATTATTTGTGC  
ACTGGCTCCAATGAGAACTTGTACGAATTTACGATCTTAACAAACCGGATGCAGCAC  
CACAAGTTTTCTCAGGTCATAAAAATGGTATCAGACATGTTACCTTTTTCAATAATA  
CTGCATTAATTACTTGTGGCGATGATAAAACATTAAGAGTTTGGGATAGGAATAGCGGC  
CAAGAAGTCAAAAGGTTAGATTTTCCGGCAATTCCAAATTCCATGGAAGTATCAAGAG  
ATGGAAATATCATTACCACAACCTCATTCCAACATAGTTACTTTTTGGAATAGTAGAGAAT  
TAACCAAATTACGCGAATACACTGCACCAACACAAATGAATAGTGCCAGTTTGCATCCA  
GATTGTAGTATTTTTGTATGTGGAGGAGAAGATTTAAAAATGTACAAGTTCGATTACACT  
ACGGGCGCGGAGATTGAATCATTAAAGGACACTTTGGACCCGTGCACTGTGTACGTT  
TTTCACCGGATGGTGAATTATATGCTAGTGGTTCAGAGGATGGTACATTGAGATTATGGC  
AAACAACCTGTTGGCAAACTTATGGTCTCTGGCGATGTATAGAACAAACACCTGCAAT  
ACAAGAAAATACTACTGTGCTTAATAATAAACAAGAAGTTCCTGCCAGTTAAAGATCTG  
ATGATTCATAAATAATGTATTTTAATACCTTCCAAAAGAGAAAAAAGAGAAGAATACT  
TCATCGAGAGAT

>novel\_circ\_001493

GAATAAACAACACTCTCGTCCTCGAAACTGGTTAAAGCGACTTGAAAAACATCGTCGA  
GGCCGCCATAATATTCTTCCTGCCTGAACTTGGCCTACAGTTTTGTGCGCTTGCTACGTT  
CACTACGTTTCAGTGTGCGTCGTACGTAGATGGTGACGGTTCGTTGGGAGAGGATTTTT  
AGTTAATGGAAAGTTCACCGGGAATGTGGAAGTATATTTGCGAGTAAATCTTTTCCTCG  
CGCTCTACCGAGTGTAGGTGCATCGAAGAAAGGGAAAAGTATCGTCATTTCGCAGTTGC  
AATCGTACATTATGGCAAATTTAAGACAACTCCGTTGACGTGTAGTGGGCATACTAGA  
CCCGTGGTGCATCTCGCATTCTCCGATATCACTGAATCTGGATATTATCTGATTCGGCG  
TGCAAAGATGGCAAACCTATGTTACGACAAGGAGATACTGGAGATTGGATTGGGACAT  
TTGAAGGACATAAAGGAGCAGTGTGGGGTGTTCATTAAATCCTCAGGCTACGAGAGC  
TGCTTCAGGTGCTGCAGATTTTAATGCTAAAGTTTGGGATGCGATAAAAGGAGAAGAA  
ATTCATTTCGTTCCAACATAAACATATTGTTAAATCTGTCAATTTTAGTACAGATTCTAATT  
ATTTGTGCACTGGCTCCAATGAGAACTTGTACGAATTTACGATCTTAACAAACCGGAT  
GCAGCACCACAAGTTTTCTCAGGTCATAAAAATGGTATCAGACATGTTACCTTTTTCAA  
TAATAATACTGCATTAATTACTTGTGGCGATGATAAAACATTAAGAGTTTGGGATAGGAA  
TAGCGGCCAAGAAGTCAAAAGGTTAGATTTTCCGGCAATTCCAAATTCCATGGAAGTAT  
CAAGAGATGGAAATATCATTACCACAACCTCATTCCAACATAGTTACTTTTTGGAATAGTA  
GAGAATTAACCAAATTACGCGAATACACTGCACCAACACAAATGAATAGTGCCAGTTT  
GCATCCAGATTGTAGTATTTTTGTATGTGGAGGAGAAGATTTAAAAATGTACAAGTTCG  
ATTACACTACGGGCGCGGAGATTGAATCATTAAAGGACACTTTGGACCCGTGCACTGT  
GTACGTTTTTCACCGGATGGTGAATTATATGCTAGTGGTTCAGAGGATGGTACATTGAGA  
TTATGGCAAACAACCTGTTGGCAAACTTATGGTCTCTGGCGATGTATAGAACAAACACC

TGCAATACAAGAAAATACTACTGTGCTTAATAATAACAAGAAGTTCCTGCCAGTTAAA  
GATCTGATGATTCATAAATAATGTATTTTAATACCTTCCAAAAGAGAAAAAAGAGAAG  
AATACTTCATCGAGAGAT

>novel\_circ\_001494

ATCGTTGGGATTCAACGGACTGTGTAAACCGGATCAACGTACTTGAGCGTCTATTGACC  
TTTACTTAAAAATTTGAATAAATAAAAAAAGAAAGAAAGAAAGAAAAGAGAGAGAG  
AGAAAAAACAGATATTTCTATCCGCTTAAAAATAAATTTATTATACTAATCAATTCTCAA  
GAATTCTCTAATAGAACGATCTATCCTATTTCGTTTCGGTTAAACACAAATAAATTAAGTA  
AAAAGTCAGAAGAGAAAGGAAAACAGTATGCGTTCAAACGTATCTGAAATTCAAATTA  
CATACAAGTTTTGAAAAAAATTTACATAAAATAAAAGAAAGAAGGAAGGAAGAGGAA  
AGAGTTAAATAAAAAAAAAAAAAAGAAAAGGAACCAGATTGAGAAGAAATCTTCTCTTC  
AATGAATGATTTATATATTGCTTTAATAAATAAAAAGGAAAGAAAGAATTCATGAGAGA  
GAAAAAAATAAATGATTGAACGAAGAAGCAGGAAGGAACGGGTGTGTACAGTGATGT  
ATTAGAACGCCTAAAAGAAAAAAGAAAAGAAAAAAGAAAAAAGTATGGAGAACG  
CGGCGATCGCACTCGACTCGACTGTTAGAAAGTCAGGATTCGAATAATTCAAAGAATTC  
GAAGGACTCGAAGGACTCGAACGCATCCGATTCGAAGCCAGAAAGTTGCCTCGAGTC  
CAAACATTCGAAGGAAATCCTTATTTCTGAGAAGCAACAACGGCAACAGCCCCGAACC  
GTGACAAGCACGACGGACGATCGACAGAAGCTGAAGAACAAGGAGTCGAAGGATGA  
ATCAACTATTCTGATGTTCACTTCTTGTGGCCAATTGCTTTTAGGTGTAGTACTTGTAGT  
GTTTGGTATCCTGGTATTGGTCCATGGCGCTGCATTAGGAGGTTCCGGTGCAGGATTGT  
GGGCAGGTGCGGGTGCACCTGCCGCAGGAGCGTTCGGTGTCTAGCAACACTTGCAA  
CGTCAACGAGCAAAACGAATTCCAGCTTTTCCACGGCTCACCTTGCAGCGAGCCTCAT  
TGCCCTTGCCCTTTCGAATATGGCTGCAATCACGGCCTTGACTGCTATTGTCAGGGACT  
CCCAGAGAACACCGGAAGTGACCTTGCTCACTGTTCCG

>novel\_circ\_001495

GCATCGAGTGCGGTTATCCAGCAAACATAAAACACGGAGGCTACACACTTATCAACAA  
TACCGTTAGTTATCTCAGTCAGGTGCTTTACTCCTGCGATGAAGGATTCGAGATGACTG  
GTCGTGCAAGATTAACCTTGTGACATCGATGAGCGTTGGAATGGACCACCGCCGCGTTG  
TGAACCAATCCTGTGCGATCCTCCAACACCTGTGCCGCACAGTTACATTCAAATCGATG  
AAATCGACGAAACCGAAACAATGCCATCGAAATCGAGCTTCAATCGAAGTCTTCTCGT  
AGGCAGCATCGTCACTTATACTTGTGAAAAGAATTATAGACTCACTGGGCACCGACAA  
ATATTATGTTTACCCACTGGATTATACGATCACATCGCACCCACTTGCATAGAGGAACCA  
CGCACACAGTGACCGCCCCACCTCGAATAACTGTACGAACAACGACCGCCAGAACA  
CGGCAACCATTCTTACCGCCACGAGTCCGACCCACGACAATCTCGACGACCACAACCA  
CGAGCACCAACCCTGTACCGCCTCGAAGAGTGGCCAGCACCGCTGAATTACCCGCGAC  
GGTTCGCGAAACCATCGCGAGGAAACCGAATGTCGGTCTTCAGAGGCCAGCACCTCC  
TCCTTCGCCACCTTTGAACGACGACAGCAGTGATCATCCTCAGGACAATGAGATTTCG  
GGCAGTGGGGTGGATAACGCACAGGTTGGGATTGGAACCGGTGTTCCAGAACCTTCTG  
GACCCTACAGGGTGGACAATGCCGACCACACGAGTAACACTCATCAAGCGAAATTA  
TCTAGGCGCTGTGATCGCCTTGGGTGTCTTCGGCGGTTTCGTATTCCTAGCCGCTGTAAT  
CACCACCGTTGTAATACTTATACGCAG



>novel\_circ\_001496

CGACGGTAGTGATTTATTGGACGACGCGGGAGACGATGCCAAATCAGTTCGCACAAAC  
GACGACAGTAAAAAACAAAATCACAGCGAGATCGAGAAAAGGAGGAGGGACAAAAT  
GAACACGTACATAACCGAGCTTTCCGCAATGGTTCCCATGTGCCACGCCATGTCCCGCA  
AACTCGACAAGCTGACCGTGCTCAGGATGGCTGTCCAACACTTGAAGACCATCCTGGG  
CGCCGTCACCTCGTACACGGAGGGGCCACTACAAGCCGGCGTTCCTCAGCGACCAAGA  
GCTCAAAACGCTCATACTTCAA

>novel\_circ\_001497

CAATGTTACCTGTAAAAACCGATGTGCCCCAAGGTGTATCGAGATTGTGTCTTGGTGCG  
CGGAGGTCTTTTTTCTGCAGAATGAAGCGAAAAAGTCGAAGGGATACGTTGCGGGGAAT  
TGCAAGTGAAGGAGGAGTCCGAGTCTGCGAGTGGATGTCATCGACGAAAAAACAAC  
AAAACGTTGACTGGAAGTACTGTGTAATTCAATGCACTGGATATTTAAAGTCGTGGGCG  
CCCGCAAAAATCGACCTCGAAGAACACGAAGGTGATGGAGACGGGGAGGCTTGCAAT  
TTGTCGTGTTTGGTAGCTGTTGGTTCGGTTGCAATCCACGATTCCGACATCTTTACCTAA  
GAAGCCCCGTTTGAGATCCATCAAGTTCGTTTCGCGACATGCGATGGACGGTAAATTCC  
TCTTCGTGACCAAAG

>novel\_circ\_001500

ACACGCCTCTGTCACCAATGGGGCCGTCGTCGCCGAGTCAGGAGGGTCTATTCACGGA  
TCTTCGCCTTTTGTCTTGGAGAAGCAGCTCAATATCGAACTCAAGGTGAAACAGGGG  
GCGGAGAACATGATCCAGAGTTTGACGAGCGGAAGGGACAAAAAGTTGCTGCAGGA  
GGCTCAACAAATGCTCGACGATTCTCGCGCTAAAATCGAGTTCCTACGTATGCGAATAA  
TGAAAGTGCGGCAAGCCCGCCAGCAGCAACACGCGCGAGGCGATGCACCACCGCCG  
AACGGCGAGGCGACTAGCAACAAAG

>novel\_circ\_001501

ACACGCCTCTGTCACCAATGGGGCCGTCGTCGCCGAGTCAGGAGGGTCTATTCACGGA  
TCTTCGCCTTTTGTCTTGGAGAAGCAGCTCAATATCGAACTCAAGGTGAAACAGGGG  
GCGGAGAACATGATCCAGAGTTTGACGAGCGGAAGGGACAAAAAGTTGCTGCAGGA  
GGCTCAACAAATGCTCGACGATTCTCGCGCTAAAATCGAGTTCCTACGTATGCGAATAA  
TGAAAGTGCGGCAAGCCCGCCAGCAGCAACACGCGCGAGGCGATGCACCACCGCCG  
AACGGCGAGGCGACTAGCAACAAAGACAGGTACGAGCCTAGTTTGGAGTTGGCGTTG  
GAGGAGAGGGTGGAGGAGCTGCGACATCGTTTTCGGATCGAAGCCGCGGTTGTGGAA  
GGGGCCAAGAACGTGATACGTCTTTTACAAAGTGCCAAAGTCGCCGATAAGAAGGCCT  
TAACGGAG

>novel\_circ\_001502

ACGGCGTTGCACTGGGCGGCCAAGCACGGCGACGAGAATATCGTCAAGCTGATCGCC  
GGCACCTACAAGGATTACATCAAGAGCGTCAATGAAACTTCGAACGGG

>novel\_circ\_001503

GGTGAGAAATATTTAGTCCTCAAGAAGAAGTATCGTCAACTTCCTATAGATCTGGGGAT  
TTCGGACCAAATTACATCACCCATAAATACTCCTGATATATCAACTCCGCTTTCTCCTTTA

CGAGTTCCGCCACCTTACCGACCACCACCTCCCGCGCCCCTTAGTCCACCTACCAATAA  
TACGAACCGCGAAGAATCGTGTTTGAATTTTGACCGTGAAGAGGCCGCTATTAATGCG  
CGGAAAAATGGCGTTGAAAGTGTGCGAGGCAGGATTTTCGACACCCTCACCTCCTGTAC  
CACCGCGTCGTAAAAGTCAAGATAAAGTCAAGATGGAAAATAAGGAGAATGTCGACA  
GAAATAGGGGAGGATCGGAGGCAGTTATCAAG

>novel\_circ\_001504

ATACGGCGCCGGATACGATTTGGCAGCGCGGCGGAAGAACGCGACGAGGGAGTCGAC  
GGCCACGCTGAAGGCATGGCTGAACGAGCACAAGAAGAATCCTTATCCGACCAAGGG  
CGAGAAGATCATGCTTGCGATCATCACGAAGATGACACTGACGCAGGTATCCACTTGG  
TTCGCGAACGCGCGGCGGCGTCTGAAAAAAGAGAACAAGATGACCTGGGAGCCGAA  
AAACAAAACCGACGATGACGATGACGCGGTTCTCACGGACTCGGAGGACAACAAGGA  
GAAGGACGATCTCGCGGGTGACAATCAAGGCGACAGAGTCGGGGAGGAGGCGAGGA  
GAGGCCTCGAGGAAAATG

>novel\_circ\_001505

AGCCGATGAGGCACGTGAAAGCGGAGCACTTGCAGCACGACAAGGACCTGGACGAG  
GAGGACGACCTCGATCTCGAGGAGGATCCCCGGCGGGGCGAGCATCCGTTCCACCAC  
GCGATGCAGCACCACCACCACCACCAAGCGTACCCCGGCGAGGACCACCTCAAG  
GACGAGGGGATCGTGAAACGGACTGCAGCGCGGCAGGCGTGCCGATACCCGCGACC  
AAGCCGAAAATCTGGTCGCTGGCCGACACGGCCGCGTGCAAGACGCCCCGCCCCC  
ACCCACCCCATCACCAGCAGTACCACCACCTCCACCACCACCAGCAGCACTACGGCC  
AGCAGCAGCAGCAGCAGCAGCAGCAGCAGCAGCAGCAGCAGCAGCAGCAGCAGCAGC  
CACCACCATCACTCGCAGCAGCCTTGCTGGGCGGCGCGGGGGGCGGGGGTTAACCTG  
AGCTCGTTCGCGCTTCCGTCCTCGGCGTCGATGAGCCCGTCCGCAGCCGCGACAGCGC  
CTTACTCGAGCGCCGCCACGAGGTACGGCGGCTTCCTCTCGTCCTCGTCAGGCGGCCA  
ACTCCACTACAACCCGAACCTCGTCGTCCGGCTCGAGTTCCTCGGCGTCCTCCTCGGCG  
GCTGCGGGGTTTCCCGAGGTTGGTACGGACACCCACCCAGACACCGCCCAACATG  
AAGGTGGCTACACCGAATGGAGTGATCCAGGCACCAACGGCCGGTACTGCACCGGG  
AACGGGAACGGGAACGCGGCCAGCAACGGTAATCCAAATCCGTACGGGAGAGCCAT  
CCGGCGGCCCGGGCTATCTGTGACAGTTCCGGCTCGGCAAGCAGCGGCTCCTCGT  
TCAGCTCGAGGCTGCAGGCGTCCCCGCACAAGGACTACTCGCCCGCGGGGCCAGAATT  
CTATTCTGCACCAGCACCAGACCACTGCCAGCTTACCGCCACGGAGGCCACCACCGC  
GTTCAAACCGTTCTACAAGGGCTCGCAGTCCATGGGTAGCGGATTCGTGTCGCCGGTC  
TAAGCAACTCGATGGATCGATTCTGGATCAACGGTCGGATTCCTCCAG

>novel\_circ\_001506

TTACGGGATGGATCTGAACGGGGCAAGACGAAAGAACGCGACGCGGGAGACGACGA  
GCACGTTGAAGGCCTGGCTTAACGATCATAAGAAGAATCCTTATCCAACGAAGGGCGA  
GAAGATCATGTTGGCGATCATCTAAGATGACTCTGACCCAAGTGTCCACGTGGTTCG  
CGAACGCGCGGAGACGTTTGAAGAAGGAGAACAAGATGACGTGGGAGCCGAGGAAC  
AGGGTCGAGGACGAGGATAATAATAACGAGGATGACGACAGTGGAAGAAAGAGCGTG  
GACGAGAAAGATCGGTTAGACTCAAAAGACTCGGGCACCGGATCGAGCGAGGACGGC  
GAGCGGCCCGGCGCACCGGATGGATCTGCTCGGCACGAGCGGCGGTTCCACCGGTGTC

CAAGGCAGAACCGAGAGCGAATGGAGCGAGTCCCGAGCAGACAGCGGCCAGACAG  
CCCGGAGTGCCTCTACGACCAAAGAGAACCTCCCAGGCATCCCTTGCAACTGCAACAT  
CCCGCGTATCTCGCCTCCTCTCACGGCCGACTGTTGCGCCACCCGTCACCCGAGAGCA  
CGCCACCTAGCAGCCACCACGTCCCGCCAAGCACGACGACAGCGTCGTCGACGGGCA  
GCGGCGTAACCACGAAGCCTAGGATCTGGTCCCCTTGACAGACATGGCGAGCAAAGATG  
GCGAACAGCAGAGCCCGATACCGACCACTATGACAGGTCTCTCATCACCTTACGGTGG  
AAGCGGCGGAGCCGGCGGAGGAGTGGCGGGCGGGGGTGGGGGCGGGGGCAAGTTGA  
TGAGCCCTTTGGCCAGTCGTCTGCCGCTCATCATCCGCTCGCGATGCACTCCGGCGCG  
CAATTTGTCCGACACCATCCGGATTTCTACCGCAACCTGTACGGGGCCTCCCATCTCGG  
ATCGGGAGACATGTCTGCTGTTGGAGACTTACTCGAGGACCCTGGGCGGACTGAGCGG  
CGTCATGCCCCCTCCACGGCGCCCAGTATACTGACGTCTGCGCGTCTGCCGTCTCGG  
CCAGTGGCAAACCTTTCTCGATCAACGGTGGCAGCACTGCTCCAGGTGGCGCTGTGCT  
CCTCACCACAGCGACATCTGGCCTGTCTCCCTCGTCCCTCGTCCACGGCGTCCCTCGGGC  
GGGTCTGGACCACTCCCCTCACCCGAGCCTGTCGTCCACGCAGGAGCTCAAGTCGCCT  
GGCCGAGTGTGATTACGAACGG

>novel\_circ\_001507

CCGGTGGTGAAGAATCTCCGAAAGAATCACCTTTGCAACCAGCTGCAAGTACCAATGA  
TGTAACGCAGAAGACGATCGTCAAGATTTAAGCTCTATTGGAGATATAACGATCGATA  
GCGTGAAGGATCATTGCTTAACAGTTCACCTTTTCAAGAAATGCAACGTCTTCCGAAGA  
ACTTCACAATCGTCTTGCAGGACTTAAAATGGAGGTGACCTCACGAACTTCGGAAATC  
TCTACTCAAATCAATCGCTAGTTTTAAAGACAACCTACCGTTGTTTCACAAACAACCAA  
CAATACCACTGCTAATGGAGAGATTGAAACAAGTCAAACAATGAAACTCAACAAGT  
GAACA

>novel\_circ\_001510

ATAATCCAAATGCCAGTCCAGTACGCGAATCTTTTGGAAATCGCCATCTCGAAAGCTCC  
TTGGTATCAGATGGTCGTCTGATAGGTCTGATATTTTGGCGGACGTTTCTTCCGACCAGT  
TGCACGTTAGCCGTTTCGTACGATGGGCGTGCATTTGCCTTTTCTTCCGTGTTTCTTTTC  
GTACATCTGTCTTCTACTTTTTCTTTATTTTCTCCTACCTAATTGAGTGAAAGAGCGTTA  
CGAAAATAATCAAATTAGTTACGTATATTGTGCATATGTGATATATTTCTTTTTTCTTCTTT  
TTAATATCAAGACTCTTTTTACGATCGAATTATTAGTGAAATTTTACAAGTTAAAACGAT  
GTTTTAAAAGCAGATTAAACGAAAATCATAAATTTCTCGACCTGAATTCGAAAAGAGAA  
ATTTATAACCTATAACCTCTAATTTGTTGTCTGAATCGCTAATAATATTGATTGGTAAATTAT  
CGTGCTCTGACGTTTCGAAACAATTCAAAAGACGAAAAAAGACGAGGAAAGATCGTTG  
GGAAATACACGATATAGAAATCTAAAGTGACAAGAGACAATCGATAAATTAAAACGGA  
GAAAGGACAATGTTGTCGTACATGCTACCGACCGAAGACAAGCCACCACCCGGAGAC  
TCGAATCAGGGGAATTACCGCGCTAATAAGTTGCAGAGGAGCCCGAAGGAACGTGCAT  
CCGCGGTTGCGAAACCGGTGGGCGGCAAAGTGATCACGATCTCCCCGAAAAAATACG  
TGGACAGTTTCGTGCAAAATGATCGTTTTCGACGAAGATCGAGGAGCGCGACGGCGACG  
ATCAGCGCCATCTGCAGGACGAACAGCGGCAACAGCATCAGGGGGTGTGAGTGAAA  
GTCCGAAGCACAACGGTACAGTGGTGAAAAAATCGACTTTGCACACCTCGAAGGTCA  
CTAAAGATGACAGCCTGTACAGTATAAACAGCGACGCGAGCACGGTTGGAAGTGATCG  
AAAGAGTAAAATTTTAAACGGGGCGAAGCACACTAGTCTGAAAAG

>novel\_circ\_001511

ATAAATTAAAACGGAGAAAGGACAATGTTGTCGTACATGCTACCGACCGAAGACAAGC  
CACCACCCGGAGACTCGAATCAGGGGAATTACCGCGCTAATAAGTTGCAGAGGAGCCC  
GAAGGAACGTGCATCCGCGGTTGCGAAACCGGTGGGCGGCAAAGTGATCACGATCTC  
CCCGAAAAAATACGTGGACAGTTCGTGAAAAATGATCGTTTCGACGAAGATCGAGGAG  
CGCGACGGCGACGATCAGCGCCATCTGCAGGACGAACAGCGGCAACAGCATCAGGGG  
GTGTTGAGTGAAAAGTCCGAAGCACAAACGGTACAGTGGTGAAAAAATCGACTTTGCAC  
ACCTCGAAGGTCATAAAGATGACAGCCTGTACAGTATAAACAGCGACGCGAGCACG  
GTTGGAAGTGATCGAAAGAGTAAAATTTTTAACGGGGCGAAGCACACTAGTCTGAAA  
AGAGTATCCTTTGGCTCAAGCAAAGGATCAATGGTAGAAACTCTAGTGTATGAGACAC  
CTGTTCAAGAAGAGCCGGAAATCAATCGTTTTATGGATCACAACGGACGCATACCCTC  
CATGATTACATCTGTACCTGATACCGA

>novel\_circ\_001513

GGTTATTGGAACCTTGCACATAGAGAATATCAAGCAGGCGATTACGAAAATGCTGAAAG  
ACATTGTATGCAACTTTGGAGGCAAGAAACAAATAATACTGGAGTTCTTCTATTATTATC  
TTCTATACATTTTCAATGCAGAAGACTAGAAAAATCTGCTCATTATAGCAGTCTAGCAAT  
TAAACAAAATCCCTTATTGGCAGAGGCTTATAGCAATCTTGGAATGTTTTCAAGGAAC  
GTGGTCAGCTACAAGAAGCTTTGGAAGAACTACAGACATGCTGTTAGATTGAAACCAGA  
TTTCATTGATGGTTACATCAATTTAGCAGCAGCATTAGTAGCTGCAGGAGACATGGAGC  
AAGCAGTTCAAGCATATGTAAGTCTCTACAATACAACCCTGATCTTTACTGTGTGAGA  
AGTGATCTTGGTAATCTTTTGAAAGCATTAGCAAGACTTGATGAAGCTAAGGCTTGCTA  
TCTAAAGGCTATCGAAACGCGTCCAGACTTCGCAGTTGCATGGAGCAATCTTGATGT  
GTTTTCAATGCACAAGGCGAGATATGGTTGGCGATTCATCATTTTGAGAAGGCCGTAGC  
ATTGGATCCAAATTTTTTGGATGCTTACATCAATCTTGGTAATGTCCTCAAGGAAGCCA  
GGATTTTTGATAG

>novel\_circ\_001515

GTGAGCGGGCTACGGTTTGAGACGCAGCTGCGTACGCTGAATCAATTTCCGGACACGC  
TCCTTGCGATCCGCATAGGCGTATCCGATACTTCGATCCGCTTCGCAACGAGTACTTCT  
TCGATCGGAATCGGCCCTCCTTCGACGCGATACTTTACTATTACCAGAGTGGTGGCAGG  
CTCCGTCGCCCGGTCAACGTTCTCTCGATGTCTTCTCCGAGGAGATCAAGTTCTACGA  
GCTGGGCGAGCTGGCCACCAACAAATTCAGGGAGGACGAGGGGTTTCATCAAGGAGGA  
GGAGAAGCCGCTGCCGTGCGACGAGTTGCAGAGGAAGGTCTGGCTGCTGTTTCGAGTA  
CCCGGAGAGCTCGCAAGGCGCCCGGTAGTGGCCATAATATCCGTGATCGTGATCCTCC  
TCTCGATCGTGATATTCTGCCTGGAGACCCTGCCCGAGTTCAAACACTACAAGGTCTTC  
AACACGACCACGAACGGCACGAAGATCGAGGAGGACGAAGTGCCGGATATCACGGAC  
CCGTTCTTCCTAATAGAGACTATTTGTATCATCTGGTTCACGTTTCGAGTTATCGGTGCGC  
TTCTTCGCCTGTCCAAATAAACTGAACTTCTTCCGTGACGTAATGAACTTCATCGACAT  
CATCGCGATCATTCCTTACTTCATCACCTCGGCACAGTGATGGCCGAGGAGGAGGAG  
ACGCTTGACCTACCAAAGGCGCCGGTAAGCCCGCAGGACAAGAGCACGAACCAGGCG  
ATGTCCTTGCGGATACTCAGGGTCATCAGGCTCGTAAGGGTGTTCCGGATATTCAAGCT  
GTCCAGGCATAGTAAAGGCCTTCAGATCCTCGGCCGTACCCTCAAGGCCTCCATGAGG

GAGCTCGGCTTACTCATCTTTTTCCTATTCATCG

>novel\_circ\_001516

CCATATTGACGCTTTATCTAAAGAATCAACTGATGTACAGTTCTAATACATCTACGGTAA  
TATATCATGTCTTCTCGATGATGGTGTACTTTTTCCCTTTATTTGGTGCGATGCTGGCAGA  
TTCGTTATTGGGAAAATTTTCGCACGATATTCTATTTAAGTATTGTCTACGCCATAGGACA  
AATTCTATTATCTTTAAGTGCGGCACCTCCCTTGGGATTACCAAGCAGAGAATGTTTCATT  
ACTTAGCCTACTTCTTATAGCCATTGGCACAGGGGGTATAAAACCTTGTGTGGCTGCAT  
TCGGTGGTGATCAATTCATGCTACCGCAACAGGAACGATATTTGTCCACATTTTTCTCCT  
TGTTTTACTTTTTCGATCAATTCTGGATCGTTGATCTCGAGCTTCTTGATGCCATAATACG  
TAATGATATCGCATGTTTTGGTGAAAATACTTGTTATTCTTTAGCATTTTTTGTGCCAGCC  
GTACTTATGATTTTATCAATCATATTATTTATCTTTGGTAAACCTTTGTACAAAATAGTAA  
AACCTACAGGTAATGTTGTGTAAATGTTTCCAAATGTATATCGCATGCTATTTATAAAA  
AGATAACATCAAAAAATGTTAAAAAGGATTATTGGCTCGATTATGCAGATGACAAGTAT  
GACAAATTGTTGATAAATGACATAAAAGCAGCTCTACAGGTAATGATATTATTTATCCG  
ATACCGATTTTTTGGGCACTTTTTCGATCAGCAAGGATCTCGATGGACGTTTCAAGCGAC  
CAGAATGAACGGTGAAATTGGAACTTCCTACTTCAACCAGATCAGATGCAAGTGTTT  
AATCCTTTTTTGGTTCTTGCGTTCATACCTTTGTTTGAAACTTGTCTTTATCCAATCATGA  
TGAAATTTGGCTTTTCTGAACCTCCGTTAAGAATAATGGTAATCGGTGGCTTTTTAGCTGCTT  
TATCTTTCGTTATCGCAGCTATCGTTGAATTTCAACTCGAGTCAACGTATCCAGTTTTAC  
CTTCAAAAGATTTTGCGCAATTACGCATTTTCAATACTTTAAATTGTTCTATAGAGGGAA  
AATTACGAGACGAGAATGAATTATCGCAAGAATTGTCCTTTATCGTCAAAAGTATGGAT  
ATGTGGGAGAATAAATATATTAAAGCAAATGGCCAAAAAAATTTTAGTTATGAAGTAAA  
TTTCAAGACATGCAATGAAGCCGGAATTACGAACATATCTTCAAATAAAATAAATGGAA  
GCATTTTTTGAATTGAAGCCGAAGCAAATTCTTGGATTATCACGCCAGAAGGTTTTGTT  
GATTATTATAAAGATTTCGATAGACAAATCAAGAACAGGTGATCCTTTAGTGCGTGGTCTT  
ATTTTTGTAAACACATTAAAATCTATTTTCCTTAGAATTGATGAAGGATGGTACATCTTTTC  
TTAAATTAATGATGAATGGCACGTTTGACAAAAATGAAGAATTAAATTCCATCAAACCT  
AATATATATGATATTCATTTAAATGGTAAAAAAGTACAAAGTAATATCCCTTCAAACCTG  
GTGGAGTTTATACAATAGTAGGATCTGTTATTGAAAATAAAACGAATGCTGCAATGGTA  
ACGGTGACTGATCCAAATTCAGTACATATATTATGGTTGATTCTCAGTATGTTATTATTA  
CGATGAGTGAAGTCATGTTCTCTGTGACTGGATTAGAATTTGCATTTACCCAAGCACCT  
AGCAGTATGAAATCTCTTCTACAAGCTTGCTGGCTATTAACAGTAGCTTTTGGTAATCTC  
ATTGTAGTCATTGTTGCTGAAGTTTCCATCTTTAATCGACAA

>novel\_circ\_001517

AGAATGTTCACTTACTTAGCCTACTTCTTATAGCCATTGGCACAGGGGGTATAAAACCTTG  
TGTGGCTGCATTTCGGTGGTGATCAATTCATGCTACCGCAACAGGAACGATATTTGTCCA  
CATTTTTCTCCTTGTTTTACTTTTCGATCAATTCTGGATCGTTGATCTCGAGCTTCTTGAT  
GCCATAATACGTAATGATATCGCATGTTTTGGTGAAAATACTTGTTATTCTTTAGCATTT  
TTTGTGCCAGCCGTACTTATGATTTTATCAATCATATTATTTATCTTTGGTAAACCTTTGTA  
CAAAATAGTAAACCTACAGGTAATGTTGTGTAAATGTTTCCAAATGTATATCGCATGC  
TATTTATAAAAAGATAACATCAAAAAATGTTAAAAAGGATTATTGGCTCGATTATGCAGA  
TGACAAGTATGACAAATTGTTGATAAATGACATAAAAGCAGCTCTACAGGTAATGATAT

TATTTATTCCGATACCGATTTTTTTGGGCACTTTTCGATCAGCAAGGATCTCGATGGACGT  
TTCAAGCGACCAGAATGAACGGTGAAATTGGAACTTCCTACTTCAACCAGATCAGAT  
GCAAGTGTTTAATCCTTTTTTGGTTCTTGCGTTCATACCTTTGTTTGAACTTGTCTTTAT  
CCAATCATGATGAAATTTGGCTTTCGAACTCCGTTAAGAATAATGGTAATCGGTGGCTTT  
TTAGCTGCTTTATCTTTTCGTTATCGCAGCTATCGTTGAATTTCAACTCGAGTCAACGTAT  
CCAGTTTTACCTTCAAAAGATTTTGCGCAATTACGCATTTTCAATACTTTAAATTGTTCTA  
TAGAGGGAAAATTACGAGACGAGAATGAATTATCGCAAGAATTGTCCTTTATCGTCAAA  
AGTATGGATATGTGGGAGAATAAATATATTAAAGCAAATGGCCAAAAAAATTTTAGTTAT  
GAAGTAAATTTCAAGACATGCAATGAAGCCGGAATTACGAACATATCTTCAAATAAAAT  
AAATG

>novel\_circ\_001518

CAACTGAAAGATGAGCTGGGTGAAAGTGGTGGCTGAAATGGAGGCGATGGAGGGCGGT  
GGTCTCGCCGTCGATGAAACCAAGCCATCGAATAAGGCTAAGCAGACGTCGATCGGCC  
GTAAGAAGTTCAACATGGACCCTAAGAAGGGCATCGAATACCTGATCGAGCACAATCT  
GCTAGCGCCGACGCCCCGAGGACGTCGCCCAATTCTCTACAAGGGCGAAGGTCTTAAC  
AAAACGGCGATTGGCGATTACCTTGGTGAAAGACACGACTTCAACGAGAGGGTGTG  
AGGGCATTTCGTCGAATTGCATGATTTACCGATTGATCCTCGTACAAGCTCTTCGACA  
ATTTCTTTGGTCGTTCCGATTGCCCCGGCGAGGCGCAAAAGATCGATAGGATGATGGAAT  
GCTTCGCACAGAGGTACTGCCAGTTGAATCCGAATATATTTACGAATACGGACACTTGT  
TACGTGCTCAGTTTCGCTATCATCATGTTGAATACGTCCTTGACAAATCCGAGCGTCAA  
GGATAAACCTAGCGTGGAACAGTTCATATCCATGAACCGTGGAATTAACAATGGCGGC  
GACTTGCCTCGAGAACTTCTTGTG

>novel\_circ\_001519

TTGGCGGCATGAATCGGCCGTCCAAAGCTGTGACCCAAGCGAAGAAAGTGGCACCAC  
CAGCTGTACCCGATGTATTTTCGACATTCTGGCTCTTCCTTCGGTTCTGCTGGATACGCAA  
GCAGTGAAGATAGTTGTTTCCTGCCCGGAAGTGGACCAGGCGGAACAACCGACGAAA  
GTTCTTACGGTGTGCCATCTGGGAAAAGTCCGGGGCCTATTTTTACCCATCCTGGGTTT  
GCCTTTCCACCAGTTGTTGGCAAATATGCCCATGCCGAGGATCAAGGAATCGATATGAC  
TCAAAGTCCTGGAAGAGATAGCCCAGGTAGTTCAGGATCAGGTTTCAAGGTTCTAGGCAT  
TCTACCGCTTCATTAGATTCTGGAAGAGCTTCTGGATATCATTAGGTCCTAGAGGACCT  
GGTGCTCTTGCTTCATCTCCAGATGTTCTGTAAGTTCACTTGGCAGTCATCCCGATAG  
ACCAGCGGATCTTGATGTTGTACATGCTTGGTTGACTGAACTTCAATTGGAAGAATACT  
TTCCTTTATTTGCTTCCGCTGGTTATGATTAGCTACTATTACACGTATGACGCCAGAAGA  
TTTGACAGCAATAGGAATTAAGAAACCTAATCATCGAAAACGCTTGAAAGCGGAAATA  
GATAATTTAAATATAGGAGATGGTTTACCAGAGCATATTCCTGGTTCATTAGAAGAATGG  
CTTAGACTTTTACGACTCGAAGAATATCTTGGAGCTCTTCATCAACAGGGTATGCGTTC  
AGTTGAAGATGTAACAACTCTCACTTGGGAAGATCTTGAAGATATTGGTATTGTGCGTC  
TCGGCCATCAGAAAAAATTATTATTGGCAATTAAAAGAGTTAAAGATATTGCGCGCTGGT  
AAACGTATACAACCCCTTGATCTTGCACGATTACCACCACATCCTGGACAAACACAGGA  
TGTAGTTATTCAACGAGGAGGTCCTGACTTGCCATCTCCTGATGAAGATTGTTCTTCAC  
CTGTTTTGAGGTCTTTCCAGAGAGGAGGAAGTGATACATCTGGAACCTACATGGAGAAG  
TATGTATGCAGCTTTACCAGCAGATTATAATATTGTTGGTTCGAACTGGTTCACGAGGAA

AATCTTTAGAAAGTTTAGAGGATGCACCTCTTGGATATCCTCCATCACCAGCACCTTCT  
GCACATCCACAACCAATTGAATGGCGTCCACGTAGTTTTGAAGATGGCGATCTAACTCC  
TACAAATGATACTTCCGTAGTGGATGCAGGTGGAGGAACTCTTCCACGACCAAGACAT  
TGTCTTGTTTCGTCCACGACCAGTAGCAAAGGTCCTGCAACTCCAGGTCAATTTAAAT  
CATTACCAAGAGATTTTGATAATAAATATCAATTGACTTATGGTCTTGAAAGTAGTCCAC  
ATCTTCCAAAACGTTGTCTCCATCTCCTCCAAGACGTCAAAGTTCCAGAGATAATGCT  
TCTGGTGTAGGTGTTGGAGGATCAGGAGTTGGCGATGTTGTGATAGATTGCAGCGGAC  
CAGTTCCAACCTGCTTCTTGCGAGGAACATCATATACATCATCAACATCATCATTTGA  
TTCATCATCCTTCTCCTCCACCACCCGCACCCGCACCAGTGCCATCAACTCCGCCACAG  
ATAAATAGACCATCTTCGTCTATGTCTCGTTCTTGGGGTAGTGTCAGCGTCAATGTTAAT  
GAAGAACATGAATTAATAGCTTCTCTTGCAATTGCAGCATCGTAATGGTTCTGATGCCAG  
TTTTAAG

>novel\_circ\_001520

ATTTCGTGTTTTATGTTCGATTATTGGTTCGATCAAAGATGGTTTGATAACGTAGTACTTTTT  
TTTATCGGTCTCAATTGTATTACATTGGCAATGGAACGGCCAAATATACCACCTGATAGT  
GGAGAAAGACTTTTTTTATCAACTGCGAATTATATTTTTACCGGGGTATTTGCAATTGAA  
ATGTTTATTAAGGTTGTTGCATCTGGTATGCTGTATGGCTCCGACGCTTATTTTACTTCAG  
GTTGGAATATTATGGATGGAGTTCTTGTAATCATTTCTATAATTGATTTATCAATGTCCTTA  
CTGTCATCGAGTAGTCCAAGAATATTTGGAATATTGAGG

>novel\_circ\_001521

GTATCAATAACTGCTATGGAAGAATCAAGGATATTATTATGGCATAGAGACAAATTAAAA  
TTAAGTATAATTAGTGATCAATTTCTGCAGGCAGTGTTTGATCATATTTTGGAAGGGAT  
GTAGTCAAAAAATTGATGCAGGTAGTGAAACAATGGCTGCTAGCAGTCATCAACAGC  
AAAATGGACAAGTAATTGGTTTAGGTGGTATTGGAGCCTTAGAAAATGATCCTGACACC  
AACTTTTTGTGTGAAAAAGACTGGTGATAGTCAAGGTATCACTGCTCTCATCAGTCG  
TCAACTTCAAG

>novel\_circ\_001523

GCATGATGGATTTCGCAACCAATAATGATGTATCATCGATTTACGTGGCGAAATATAATC  
GTTTTGTGGACAATATTTAGGAAGGATTAATAAAATCTTGCGTAGTAATTACGATCCAG  
TFACTGTGAAATTAACCTAACGCAAATGCTAAAACGAAATCAAACAAACACAAGAACAA  
GAGTAAACAAAGAAAAATAACAAAAGTGGAACGAAAAAGAGCAATTTGGGAATAGT  
TGTGGTATCCACAGAAAAAACCATACAAGAAATTCCCGAAATCACACAGAAAAACAATA  
GAAACCACTGAAAATACAATCATGTCTGTTACAAATATTGAAAAAGAAGAGCCTCATA  
CTACCATATCTGAATTTGCAAATATGGAATTAATAACAAACAGACAAGTACTTAATTCAA  
GTACCAAGAAATCAAAGAATATGCAAAATACAAAATCTACAAACAAACGAGTATCCAA  
CTTAACAAATCAAACCTAGCAAGAAATCGAACAAAACCTCGTGGTGGAACGAAGAATCA  
GAAAAAAACAAACAAACAGAATAACAACAACAAAAATAAGATAAAGAAAACCAAAA  
AACCAAAAAGCAAAAGCCACACTTTATGGACTTGCAAGCCTTAAAAGATCAGGAGACG  
TAACAGTAAACATGATGAGCGATCACACTATGATCAAAACGATGTTTACCCTTGGTCCT  
CTTGATTGAAAGTCGAAAAGGAATTTGGTAGGGCTGCAAAAAAAGAATTGAGAAGC  
GCGACTGCAACCACTGCAGAAATGTCAGGAAAATTAAGCCTTCGAATTCTTCATGGTG

GTGCTGCTACCCTTAATTCCATTTCGAGTTTTACAACCTAAACAA

>novel\_circ\_001524

GACCGAAAGAATTCAACTATAGAGGGCACAACCTATTTCTACAGCGGACATATCCCGCT  
CATGCAAATCAAAGGGTGGATTGGTTAGATGCTAGAAACATTTGTAGAGAATATTGTAT  
GGATCTTGTTCATGGAAACGCAAGATGAAAATAACTTAATCTTCAGACTCATTCAAC  
AAA

>novel\_circ\_001525

TGATGAATCAAAAACGCGTATTCAAGAAATCTTTTCACAAATTGAACAATTGAAAATAG  
AAGAAAAATTATTGTTGTACCTGAAGCTTCCATTATCATTGACTAATACTGGAGGAACTA  
TTGATCCTTTGAGACAACCATTAATCCATTAGGAAATCGTTATGAAATTCATCAAACCTA  
TCATGTGGATTAACACATTTGGAAGAAGATCCAGATGTTTCTTTACCAAACAAGA  
AGTTTATGATGAATATAATATGTATTGTATGCGAAATCTATGAAACCTCTATCAACTGCT  
GATTTTGGCAAAGTTATGAAACAAGTATATCCAAGAGTTCGACCACGTCGACTAGGCA  
CACGTGGAAATTCACGTTATTGTTATGCTGGAATGCGCAAAGAGTTAAATTGGATTCT  
CCGACATTGCCTAATATATCTGGCACTCAAACCT

>novel\_circ\_001526

AATGGCTGAAAAGTCTGGATGTGGCGAATTACAACAATTAGTTCAAGAAGAAGAATGT  
GAAGAACCATTGAGTCAAGGTGGAGAAGCTACACCACCTTCTACACCAGCAAGATCTC  
ATCATCCAAGTAAAAATGATACACGTAATTCTCATATATCGCAACAAATATTATGGGAAA  
CAAATATACAAACATCACCTATTGTTAGTAAAGGAAGTTCTGGTCAAGCAACAAGTCA  
AGGATCTATGGTTTCTGGTCGAGCCGTGAATCTTTCAAATCATAGTAATCAATCTCGATT  
AATGTATATGAATGAAAAGGAAAAACAAAACCATCGACCAGAATTATCAAAAATT  
AATCGTCAACATAGAGCTATGGCACCATGCAAACATCATTGCTTTTTGTGAGAGGTTCC  
TGATGTTTCGACGTATGGAACAAGCTTTATTACAACCTTTTAGAAGATTTTCATAGTGGTAA  
TTTACGAGCATTGGAAGATTGTAGTATGGAACAAATGACAGAAATACGAGAACAA  
CAAGAGCAATTAGCCAACTTCATTTGAGTTAGGTCAACGACAAGGAATTGGTGGAG  
ATCAATCAGGTCTCAGACATTCAAGTGCAAATATGGATAATTTATTGGAATGTTTGCAAG  
AACTTAGTGTTGTATTGAAAATTACATAGCAA

>novel\_circ\_001527

AATGGCTGAAAAGTCTGGATGTGGCGAATTACAACAATTAGTTCAAGAAGAAGAATGT  
GAAGAACCATTGAGTCAAGGTGGAGAAGCTACACCACCTTCTACACCAGCAAGATCTC  
ATCATCCAAGTAAAAATGATACACGTAATTCTCATATATCGCAACAAATATTATGGGAAA  
CAAATATACAAACATCACCTATTGTTAGTAAAGGAAGTTCTGGTCAAGCAACAAGTCA  
AGGATCTATGGTTTCTGGTCGAGCCGTGAATCTTTCAAATCATAGTAATCAATCTCGATT  
AATGTATATGAATGAAAAGGAAAAACAAAACCATCGACCAGAATTATCAAAAATT  
AATCGTCAACATAGAGCTATGGCACCATGCAAACATCATTGCTTTTTGTGAGAGGTTCC  
TGATGTTTCGACGTATGGAACAAGCTTTATTACAACCTTTTAGAAGATTTTCATAGTGGTAA  
TTTACGAGCATTGGAAGATTGTAGTATGGAACAAATGACAGAAATACGAGAACAA  
CAAGAGCAATTAGCCAACTTCATTTGAGTTAGGTCAACGACAAGGAATTGGTGGAG  
ATCAATCAGGTCTCAGACATTCAAGTGCAAATATGGATAATTTATTGGAATGTTTGCAAG



AACTTAGT

>novel\_circ\_001530

CTGGTGGAGAGGCTGCAAGAGGAGAAGAGGCTGGAACAAATACGAAGAAAGGAAAG  
AACAGAAGCATACTTGTATATAACCGTCAACGTCCTTCTTGAGGATAATTTTGACGGTC  
ACCAAGGGAATGACTTGTATGATCCAGAACATGCTTTGTATCGTGTATTTTCGCGTACGTA  
AGCAGTGTACCTTGACGAGTTTCTCGAATTGCTGAGTGATAGCTTGAAATATCCAATA  
GAACAAATTCGTCTATGGCCACTGAATGTACGTTCAAACCAAACCTTGTAGACCAATGCC  
AATTGAATTAGAAAATGATCTTCAAAAATCTATTTATCAATGCGCGGAGAACCCAAATG  
TTTGGAATGTATTTGTTGAACTTGTTCCCTCCAGATTCTGATTTAACAGCATTGCCACCTT  
TCGATAAAGATACTGATGTTCTCTTATTTTTTAAATTATATGATCCTAAAAATAAAAAGAT  
TCATTATTGTGGACATCATTATATGCCTGTACAGCTAAAGTCCAGGAACTTATACCAAT  
TTTAAATGAGAGAGCTGGTTTTCCACCTGATACGGAATTAGCTCTTTACGAAGAAATTA  
AACCAAATTTGGTAGAAAAAATAGATAATCTAACAGAACCATTAGAAAAAGTTCTTGA  
AGAATTAATGGACGGAGATATTATTGTTTTTCAAAAAGAAGGAGACAATCAAATGTATG  
AGCTTCCAACATGTAGAGAATATTTTAAAGATCTATTTCATAGAGTAGAAGTTACATTTT  
GTGATAAAACGATTCCTAATGATACTGGTTTTACAATGGAACCTTCATTAAGAATGACAT  
ATGACCAAATGGCAAGAGCTGTGGCACAGAGACTTGGTACAGATCCTTATCTTTTGCA  
GTTCTTTAAATGTCAAACCTTACAAAGATTCACCTGGACATCCATTAAATGTACATTTGA  
AGGTTTATTGAAAGATTTGGTTTTCTTATTGTAAACCTAAAGCGAAAAAATTATATTATCA  
ACAGCTTAGTATTAGAGTAAATGAACTTGAAAATAAAAAGCAATTCAAATGTATATGGG  
TTGGTCCATCTCTTAAAGAAGAAAAAGAAATTATTCTTTATCCTAACAAAAACGGAACA  
GTAGCAACATTACTTGAAGAAGCTAAAAAACAAGTAGAATTATCAGAAAATGGATCCG  
GAAAATTAAGGATATTAGAAATTAATTCTAGTAAAGTCTCACCTGGTCCAAGAGAAGAT  
GTACCTTTAGATAACTTAAATACATCTGGTACAAAATTATACAGGATAGAAGAAATTCCA  
AATGATGAATTAAATTTGGCAGATGATGAAATGTTGGTTCCTGTTGCACATTTCCATAAG  
GATATTTTTTCAACATTTGGTATTCCCTTTTTCTTTAAAATCAAACATGGTGAACCTTTTC  
CAAAAATGAAGGAAAGACTATTGAAGAAATTGGGAGTACAGGAAAAAGAATTTGAAA  
AGTTTAAGTTCGCGGTGGTAACAATGGGTAAACCACACTTTATTATGGATTGCGCCAGAA  
TATTGCATGGATCTTGCTGATTTTCGTATTTCACCAAATCAAATTTATCCACTTTTAAATG  
CAGGCACATCGCCACTTAGGCCTTGGCTTGGCCTAGAACACGTCAACAAAGCGCCAA  
AGCGCTCTCGTATCAACTACCTCGAAAAGGCCATTAAAATTTACAATTAAATTTTCATCA  
TACGAAGAAGAATAAAATTAGGCAGCCACTCATATAATTTATACGACTCTATAGTAAGA  
AAGCAACGTCTGATATACGATGGTTGGAAATGCGTTTGTATTCGGTTCCTCAGCCAGAT  
AGTACACAGTTTTAATATTACGATCATGTTAACGAAAGGTAAATTTACGCTTTGTATACG  
ATGGATTAAGAGACTGTAATGACCCTGCAATGATACTTTATGCATCATGGAAGTTCTCCC  
TTTCGAATCGACAGGGATTTTACGTAATGGCTGGATCGATGGTACTACATTGATTCCACT  
ATGCTCCAACAATGGATTAGACACTTCTCTCTACGAAATCAATTTTTATGTTTGTAAATA  
TTTTGCTGATCAATGGCAATTATTTAACAAATATTTTTGAAAACACTGTTTTATTATATT  
CGAGTCTATCAAGAACAGAATTTATTTAAATACATATTTTATTACTAAATAAAGAAATA  
CGGATAACAACTGCAGAATGAAGAAAACCTCGTATCAGGAAACAAAAAG

>novel\_circ\_001533

GTGTACAAAGGCCTCGACATCGTGACCGCGAAAGTAACGAAAGAGGAACAAGCAAA

GGCGGCTCACCACATGTTGGACATCGTAGACCCTCTGAACCCTAGCTACACGGTGGTAC  
CAATTCAGGGATGCTGCCATACCTATTATCAACGATCTTCTCGCGAGGAGGAAGCTCCC  
GATCATCGTCGGTGGCACCAACTATTACATAGAGTCCATCCTTTGGGAAGTTCTGATGA  
ACGACTCGAGGATCGGCAAGGACGATGATGACCGGTTGGACGAGAATGTGTCGCGTA  
CGAAGAGGATGAAGATCGAGTTGGATCGATCGATGACAAAGGATAACCAGGAGCTTTA  
CGAAGAGTTGGTTAAAGTGGATCCGGAAATGGCGAAGAGATTTTCATCCGAACAATAGG  
AGGAAGATCATTCTG

>novel\_circ\_001534

AGGAGGAAGAGATCGACGTGGTGACCTTCGAGAAACCGTGCAGACCGGCGGCATTAC  
CAACGTACCCGAGCCTGGCCGACCAACAGCACTTCCAATTAACGGTGAACACAGCGTT  
CAAAGAGAAAGCTCCTGGAACCAGACCACGTGGCCGACCTCCCTCGAATCCAGCTCG  
GAAAAGGACCGCTCAATCGGAGCCGAAGCCGGCGAAACGGGCCCCGGCACAGGACTT  
ACCAGAGGAGGACCAAGGTGGGACGATGCGTATCGTCGTCGCCCAAGAGCGTGTCTGA  
GAAGCTCCTCCGACGACGAGCTGGACACCGAGAAGAGGAGTCTGCACAACAACATGG  
AACGCCAGAGGCGGATAGAGCTGAGAAACGCGTTTCGAGGATCTGCGTATCCTCGTGCC  
AGCTGTCTGAGAAGAAGGAGAAGGCGCCGAAAGTCGCGATCTTGAGGCAAGCGGCTG  
TCTACTGTGATACATTGAACGAGATGAACCAGATCTCGATGGCCCAGGTGGCGGATCTG  
AGGCGGCGACAAGAGAGGCTTCGAACGAGGCTCAGTGTTCTAAGGAGGAGTCTCGCC  
ATGACGCGCTGAGGGAGAGACTCGGGAGAATCGTGTCAGATTCAGCCACGAACACG  
CGAACCACACCAACCACTTGCTCGAAACGTACGAGTCGAATTTGTTGTTACTCCCTCG  
GAGAGAAGAGAATGGAGGACGATGGATGGATGGATGGATGGACGAGCGACAAATCTC  
TACTCGACGTTTTTCGAGACCGTAGGGACGATTTTTTTTTTCAAACACGCCTGCATGCGAAC  
GAGGAAGACTGCCTGACATTGTTTAATTTGACACTCTGACACTTGTATCTGCCTTCGGT  
CGCACAGCATAGGGGAAAGAAACGCTTCGAACTAGAGCAAGATGGCGCCGTTGAGTA  
AGAAGCGTCGGGCATTTTTAGTCCTGATCAACGAGAAGAGAGATGAACGTGTTGCGAT  
TCTCCGATCCTAATCGAAGTTCTCGGAACCTTGGTCGGATATGGATAAATCCATATCCGTT  
TTATCGTATAAGAGAAACGAATATATATATACATATAATATTTATATATATATATGTATATATA  
TTTATATATATGCACACGTAATGTCAAAAGCGTCCCAAGTTTCGTTTGCTTCGAGTTAAG  
GGGAGAATCGATGAAGGATCGATGATATTAAATGATGATTCGTTCTGTCTGAACGTGTAC  
CAAGAACGAAGAGAGAAGAGATGAAATATCGTTTCGCATATAATCGACACCAACAAACA  
TTGGAAGAGATCGAAGAAACCGCCAAAAAAAAGGAAAATAGCTTCGAAGAGGATATT  
TATATATACGTATATTTGTAGAAGAGTTTCTTCGAATAGCGAACTGCAAAAAAGGTGAA  
GGGAAAGAATTGATAGAAGATCGCTTTGGCCGGAGTTCGCAGAAG

>novel\_circ\_001535

GCGAAATGCCGGTGCCAGTTTGGGATTGCTCTGACCTAGGCCTGTTGGACGAGCCTCT  
GGCTACCACGACAGTGGTATCCGATGACATATGGAAGAAATTCGATTTTGACTTCCCTC  
TGGACCGTTTGGACGCCGTCCATACGGATGTGTATCACGAGCGCACGTTTCGAGGATAG  
CGTTCTGCCGGATTTGCTGTACGGCAAAATGAGCTGCCTTGCGTCACGAAAGATACGT  
CATCATGATTGCATGTGGGCTGGGCTGTGCATCAGTAAAGAGCATAACAGGACGTTGC  
CCGCGAAGAAAACTCACAGATGCAGAAAAAGGTGCCGGCCGGTCGTAGTGTGTTGA  
TATCGCGGGCAGGCATAACTCATATAGGAAATTCCTTGGTCAATCAGCAACAACAGTGC  
CGTACAAGAAATCTGGAGAGTGACGGAGATTCAACTAGACCGGAAACACCGAGCTCG

AGCTCCGATACGGAGACGGAGGACGAGGGCCCGTTCTTCAGACACGATCAGATCAATA  
TACACGAGAAATTGTCCGAGTGCATGTCAGACGCGGTTACCAAGGCTGTCCCAGTGAG  
CGAGGTCACCTGGCCAGCTGGTCAGGTTCCATGACAGGAGGAAAGAGGAGGAGGAAA  
ATCAGTGTCAAGTGCATAGAGAGACCAATATCAGGAACACTCTGAGCGACCATTGCTAT  
CATCTGAATCAGCCTATTGGGAAGAACCTGGAACATCTTGGTGTACAGACACCTTCTGA  
TTCCG

>novel\_circ\_001536

ATGCCTTTTCGTGTTGTAAATAATACTGTGAAAAGAAACCTCAGACCGAAGATGGGCAA  
GCTTTTGAGCCTTCTGGCTCGAGATGAGTCTACCTGTTGCACCCCTCAAAAGTACGAC  
GTCTTTTTTGATTTTCGAAAATGCACAACCTTCCGATATAGAACGGGAGACCTTTGAAGC  
GGTGCAAAGAGTTTTGAAAAATTCAGAATCTATTTTAGAGGAGATTCAATGCTACAAA  
GGTGCCGGAAGAAATCAGGGAGGCGATTTCCGCTCCACGGAAGAGTGTCAACGA  
AAAGCTTACCTGACTGTTGCACCTCTAGTCGCCAAGCTGAAAAGATTCTATGAATTTTC  
ATTGGAACCTTGAGAAGGTAGTACCAAAAATCTTAGGCCAACTGTGCTCCGGTAATCTCT  
CCCCGACCCAACATCTCGAGACTCAACAGGCATTGGTGAAACAGCTGGCGGAAATTCT  
GGAATTCGTCTTGAAATTCGACGAGCACAAAGATGAAGACACCCGCTATTCAAATGAT  
TTTAGTTATTACAGAAGAACGTTGACCAGAGCATCTCTGGCGCGACAAGAAAGCGCTG  
AAAAGGACCTCGTGGTCGGGAACGAGCTCGCCAACCGAATGTCCTTGTTCTACGCCCA  
CGCGACACCCATGCTTCGTGTTCTGAGTCACGCGACCATTACTTTCTTGATGGAC

>novel\_circ\_001537

GAAAGTGACTTTCCACGGCGATTGATACCATCCCTCGAAGAGACCGCAGAGGGTCCGT  
TGGAACGAGGACTCGTGAGTTGGGGGGAGGGGAGCGAGACCACGGGTCTTTTCGAG  
ACCCTCGTTAAACCTATCCCCGAACGACCGAGTTGGAAATAGTTGGAAAAGATGTAC  
CTCTCGTTGCTGAAACAATCCCCGTGGAACCTTTATTGTTGATTATTCAGACGAATTTAT  
CGCGACTCGTTTGTTGTTGATCCCCGCGCCCGTTAAACTTGTTGATCCTCGCGAGTGT  
GCGCCGCCATCGAACGCGTCTCCTCGTGGAATTCACCGTGGAACCTGAAAACGGATAA  
CACTGTACGCTCGCTCGTGCGGCGTTCGAGCGTGTGAGTGGAGGAGGAACGAGCCG  
TCGCTTGTTGTGTTATGAAAACGGATACGGACGAACGTGATCGAAGAAGAGGAAGAAT  
AGTTGTTTTGTTGCTCGTTCGGTTGTAAAAGGGTGGAGGGAGAGAGGGAGGGAGA  
TTGTTAGCGTCTCGAAGAAGATTGTTGTTTTCTTCGTTTCTCTCTTCGGGAGGGGAAAGT  
ATTTTTTATGGAATTGAAAAGAAGTGAATCACCGACGATCATCGTATTTTCATCGTGTAC  
GAAAAAAACCAGTTGCAAAGTTTTTCTCGACAATTCTTCTTTATCTTAAATAAAAATT  
CAAAGTGAGTAAAAGAGAAATACATAGTAAATGAAACGGAGTTTTTGCGATCGGATCA  
GTATTAAGGATCTTCCCCGTGCGATAAGAAGAAAGAAAGAAAGAAAGAAAGAAAGGAA  
AGAGGATGAAATATACAAATGGAGATACGAGCGACACCGATTAACTTGATTAAAAATT  
GGAAAAAGGATCGTTTTACACCGCGCTTTTAAACACCGAATGTGCTTGGAATTACGAA  
GAAGATTAAGAAATTCCCCAAAGTTCCCCGAAAGGAGTTTGTCCCCAAGGAAACGCTC  
TTGTCCACGATAAAATTTCTTGAGAGAAATTCGAAAAGTGGATCTTCCGCGAAATTTTC  
GAAATCGAACCAGCGATCAAGAAGAATCGTTTTGTGGAAGTTGTGTAATTGTAGGGA  
GTGGATGACGAGTCTCGGCTAAACACGAGCAAACAGGTCTCCTCGAGGAGGTTCTCC  
CTTCGAGGGGAACTGGAAAGCTTGGTGAATTGTTGGAGCGGAAGCTGAGCCGAGGGA  
CGGTGCAATCGAGCATCGAGTCGAAGGTGGACGGGATCGGATCGGGGGAAGGGAGAG

GAAGGGAGAGAAAGAAATTCGAAACGGCTGCTCGACGAAAGTGGGTGTGGTGTGGAT  
CGAAGGATCGATCTCGTTGGGAAATCGATCCGGACAACCTCTGCCAGATGACTTTAAGG  
AGGGTCCACGAGGACTCGGCTGACACGTCGTTCGATATTCGAGTACGAGGACGTGATAA  
AGTTATAATAACAGGAGGGAGCCTTAAGTTTGAAAAATCGTTGAGAGAGAAATATATCT  
AGTTAGTACCCGCTCCTATTTCCCTTAAAAAAAAAAAAAAAAAGAAAAGAGAAATAAAAAA  
GAGAGAGAGATATATATATATTCATATACCTAGATATATATGTATACATAAATGATATATTGA  
TGTTAATCGAAGTTTATTGATCGATCGTTTTTCTTCCCACTCCCGTTCTGTTGAAAGATA  
AAACCGATTTGGCGACGATTCTAGGGGTGGGGTGGGGGTGACACGGAAAATTGGCG  
AGGAAACACGAGGGGAAAAATGGCGATGGTAATATCGCCCCGTAGCAAGATCGTGACA  
TTGTCGTTGTTGATCGGTATTATCACGGTGGTGGCGTTCATAGTGAATGATCGGGATA  
TGGCACAAGAGCGAGAAACCTGGCAAGACTGGGACGAAGGTGGTCAGCAGCAAGCT  
TCAACAGATCACCGGATACACTGCCACCAAACAC

>novel\_circ\_001538

GGTCCGCCAGGGAAGAAAGGAGAACCCGGCACGTGCACCTGCAATGCAACAGCCCTG  
ATGGCATCCTTTACGATGCCAAAGATGATCCAGGGACCGAAAGGAGAACAAAGGGGTG  
CCGGGGCAAGAAGGAAAACAAGGCCAAATGGGGTTGACGGGTGTTGCTGGGCCACC  
AGGAGAGAGAGGACTAGAAGGACCACAGGGGCCAAGGGAGATAAAGGTGACGTGG  
GAATACCGGGACCGGAAGGTCCTCAAGGGCAAAAAGGAGAACCTGGCCGCGATGGAA  
TACCAGGGGAAAAGGGCGCTCAAGGACCACCAGGCCCCCAGGAAAAGGAGAATTCT  
CCGGATACGAT

>novel\_circ\_001539

GGTGTGCTGGGCCACCAGGAGAGAGAGGACTAGAAGGACCACAGGGGCCCAAGGG  
AGATAAAGGTGACGTGGGAATACCGGGACCGGAAGGTCTCAAGGGCAAAAAGGAG  
AACCTGGCCGCGATGGAATACCAGGGGAAAAGGGCGCTCAAGGACCACCAGGCCCC  
CAGGAAAAGGAGAATTCTCCGATACGATCCAGTTGGAAACCTCGGGGCATTATAG  
GACGGAAGGCATCACGATGAGACCAGGACTACCAGGGCAGAAAGGCGAGGCAGGCC  
TTCCAGGAAGTCCAGGACCAAAAGGAGAGACGGGAATCGCTGGTGCCAAAGGTAACA  
AAGGCGAGCCAGGTCACAAAGGCGCGAAAGGAGATCACGGGAATGAGGGTGTCTGA  
GGAATTCAAGGATCGAAGGGTGAACCTGGTGCACCGGGAGCGCCGGGTCTCCCTGGT  
GCGCCAGGTGAGAATGGAAGGCCAGCCGAAAAGGGCGATAAAGGAGACACAGGACC  
AGAAGGGAAGCCAGGCCCCCGGGAGCGCCTGGACCGCCAGGATTGCCTGGATTAAG  
CGTCTCTGGAGGGGTAAACGTTGGAGAATCGATGTAAAGGGAAAAAGGCGACAAAGG  
AGAGGGTGGTGCGCGTGGTTACAAAGGGGACAAGGGCACCAAGGCGAGAAGGGAG  
ATAAAGGTGATTCTGGACCAGCCGAATTCCCGGTGTAAATGGTATTCAAGGACCGCA  
AGGGAACAAAGGCGAGCCAGGCAAGGATGGAGTTGCCGGTGTTCAGGGAATCGCGG  
GTGCAAAAGGTGAAAAAGGTGAGAGAGGTCCGCCAGGAGCCACCGCTATAGCGAGTT  
CCGGAGACTACATCACGATCAAGGGTGAGAAGGGCGCGGAGGGGAAGAGGGGGAGA  
AGAGGACGCCCTGGACCACCGGGACCCGTGGGCCACCTGGAAAGCCGGGAGCGATG  
GGAGAAATTGGGTTGCCTGGATGGGTGAACACCATGAAAGGTCGTCTTGAATCCC  
GGAATTCCTGGACCTGTTGGACCAGCGGGGCCAAGGGAGAAAAAGGAGAACCGGG  
CACACCGAGCCCTTATGGAGTCTCTGTGGC

>novel\_circ\_001540

GCGAAGGGGGACAATATTTTCGCGTGAGGCCGAGAAACAGCTCTGTCCAGGAAGGCC  
GTGACGTAACAATATCTTGCGAAGTTGGAAACAGAGTTGGGATCGTGCAGTGGGTGAA  
AGATGGCTTCGCCTATGTCATACAATCGAATGGAGAAATCGTGGGGCATCCGCGATTGA  
GATTAATAGGCGATCAGAGCACAGGAGTTTACAATCTTCAGATCACGCAAGCTTCTTTG  
ACCGACGATGGGGAATATCAGTGCCAAGTTGGACCGTATTTGCGCATTAAATCGATCCG  
TGCCAACGCTCATCTCACCGTCATCT

>novel\_circ\_001541

GTAGCAAACACGTAGAATGGTAGCCTCCCAACACGACGGTACCAGAAGTGTCCGGTGG  
CGGCGGAGACGGCGGAGGCGGCGGCGGCGGCGGCGGCGGCGGCGGCGGCGATGAGACCGTGT  
ACACGGTGACCGTGAGTGGTGTCCGGTTACAGGAACGAGGGTTACAAGGACGACGGTA  
CCGACGGTATACCTCCCGAGCCGCAGAAACCGCCGCAATTATCGTCGACGGACGACGA  
CACCCAGTCGAGAAAGTTCAAACGTGCCCGCGGCGAGAAATGGCGTATCTTGAAGAA  
CATTAGCACCGTGTCCGTCGCGTTCATGGTGCAGTTCACCGCGTTTCAAGGGACGGCC  
AATCTCCAGTCGTCGATCAACGCCAGTGACGGTTTAGGCACCGTTTCCCTCTCCGCTAT  
TTACGCTGCTTTGGTGCTGTCTGTCATCTTCGTCCCCACCTTCGTTATCAAACGGCTCA  
CCGTTAAATGGACACTGTGCATCTCGATGCTGTGTTACGCGCCCTACATCGGGTCCCAG  
TTCTACCCGAAATTTTACACCCTGGTGCCGGCTGGCGTTCTCCTCGGTTTGGGGGCCGC  
GCCTATGTGGGCAGCGCAGGCCACCTATCTCACGCAGGTCGGCGGTGTGTACGCGAAA  
CTCACCGATCAGCCGGTAGACGCCATCGTGGTCAGGTTCTTCGGCTTCTTCTTCTTGC  
ATGGCAGACCGCTGAACTCTGGGGGAATCTCATTTCTTCGCTTGTGCTCAGCGGGGA  
GAGTTTCGGCAGCGGGAGCGAGAACAGCACCAATTCGAACAAGATCAAGCACTGC  
GGCGCAAATTTCTGCGTCCTTGGGAACGGCGGTACGAGACCTTGGAACGTCCCCCG  
GAATCGGAGATCTATGAAATATCCGCGATCTATCTTTCTTGTGTAATCGTTGCCGTCATC  
ATCGTCGCCCTGTTTCGTTCGATCCGCTCTCGAG

>novel\_circ\_001542

GCATGCCCCCTGAACCCTAACCCCCAGCCGTTGACCGGCCAGCAAGAGTTGCTGCAAG  
ATTTCTCGAAGAGGTTCTCGCCCCGCGATCCGCGGCGTGGTCGAATTCGCGAAACGCAT  
CCCGGGATTACGCCTGTTGGCGCAGGACGATCAGGTGACGCTGCTGAAGGCGGGCGT  
TTTCGAGGTGTTGCTCGTCCGGCTCGCTTGCATGTTTCGACGCCCAGACGAACAGCATG  
ATATGCCTGAACGGGCAGGTGTTGAAGCGAGAGTCCATCCACAACAGCAGCAACGCC  
CGTTTTCCTCATGGACTCGATGTTTCGACTTCGCCGAGAGGGTGAACTCGTTGCGGTTGT  
CGGACGCAGAACTCGGCCTCTTCTGTTCCGTTGTCGTGATCGCCGCCGACAGGCCGGG  
ATTGCGCAACACCGAGCTGGTCGAGCGCATGCACAACAAGTTGCGGAACGCCCTCCA  
GACAGTCCTCGCGCAGAACCAACCCCCAACACCCGGACATCCTGAGGGAGCTGCTGAA  
AAAGATCCCTGACCTGAGAACCTTGAACACCCTCCACTCGGAGAACTGTTGGCGTTC  
AAGATGACCGAGCAACAGCAACAGATGCAGGCGCAGCAGCAGCACCAGCAACAGCA  
ACAGCAAACGCAGCACGTGATCAACGCTCAACAACCGCAGCAGCAGCAGCAACAAC  
AACAGCAACAACAACAACAGCAGCAGCAACAGCAACAGCAGCACTGGCCTATG  
GAGGAGGAGCCGGCGGCGTCCTGGGGCTCAGCCTCGGACGTTACCCTGGACGAGGCT  
GTGAAGAGTCCCTTGGGCAGCGTGTGAGCACCGAGAGCACCTGCAGCGGGGAAGTC  
GCCTCCCTGACGGAGTATCACACGTGGCCCCGCCAGCGGGCACACGCGTCCAGC

GCCCCCTTCTTGCCGCCACCCTGGCGGGCGGCCTCTGCCCCCATCGCCGCCGAGCGA  
ATTCGGGCAGCACGAGCTCAGGGGACGACGAGTTGCACCGCGCCTCCCTCTCGAAAA  
CCCCCAACCGCCCCAATGCCCCGATTCCGCAAGCTCGACTCGCCGAGCGACAGCGG  
GATCGAGTCAGGGACCGAGAAACCGGACAAACCGGCGAGCAGCAGCGCAGCAGCG  
CGCCGACCTCGGTCTGCTCCAGCCCCCGCTCCGAGGACAAGGAGGTGGAGGACATGC  
CGGTGCTGAAACGGGTGCTGCAAGCGCCACCCCTGTACGACACCAACTCGCTGATGG  
ACGAGGCGTACAAGCCCCACAAGAAGTTCCGCGCCCTCCGCCAGAAGGACAGCGCGG  
AGGCCGAGCCGGCCGTGATCGTGCAGCACACGCAGTCCCAGCTACATCTCCACTTGAC  
CTCGCCGCCGGCACGGAGCCCGTCGAGCCAGGCGCAGGCGAGCCAATGCCCCAGAC  
GGCAAGCCTGTTGAGCAGCACCCACTCGACCCTCGCGAGAAGCCTGATGGAGGGGCC  
GCGGATGACGGCCGAGCAGTTGAAACGCACCGATATCATTACAAATTACATAATGCGG  
GGCGAGGCGAGCCCGAGGTCGCCGAACGCGTCGCCCTCGCCCGCGGAGCAATGCGCC  
TCCACCACCACCATCACCGCGGATCACCCCAAGGATCTCAAGGACTGCTGCAGTGCG  
CGACCAGCAACTACTCGACGACCAGGTGGCCGGCCACGTCCGTCATCACGACGACGA  
CGGGCGCCCGGCAGCAGCAGCAGCAGCAGCAACAGCAGCAGCAACAGCAGCAGCAG  
CAACAACAGTCTTCCTCGGACTACCTCATGGTCGGGAACTCGCCGGCCTCGTCGCCAA  
GGTACCTGTCCGCGGCGGCGACGAGTAGTACGAGCACGAGTCCACGGCCCGCCTCGA  
GCACGGCTGCGACGCTCGTGTTGTCCGGCTGCCCGAGCAACATGATGGAGCTACAGGT  
GGACATAGCGGACAGTCAACAACCGTTGAACCTGTCGAAGAAGTCGCCGTCCCCGTC  
GCCAAGGCCGTTGGTGGGCCCCGTGCAAGGCGTTGTCCCTCGAGGCGTAGTGGTCTGAT  
GGACGGGCCGTATGAACGTGTCTTGTGCTCGTGACATGGGTGATGATGATGATGA  
TGATGATGATGATGATGATGATCGTTGGTTCGTTGTATATTCGTTGTAAACCCCCGCAC  
GATAACAACATCCCTGGACGACAGAGCGCGGCGAGAAAAAAGAATTGTATATCGGCG  
GTGCGGCGATTAACGGATGCATGCACGGTGTGTTTCGTCGCGAGGGGAGAAAGAAGG  
GAGAAGGGGAAGGGAGGAAAAGTCGGAGAGATCAACGACTTTTGGTTGATTGGTGGT  
GTGAAAATGAAAAAAGTTGGTGTGTGCGCGCCACGTCGTTCCCCCTTCCAGGAGA  
CACGGAGTGAGAATGGAATGGGAGAAGGAGGAATTTAAAAAAGAAGAAGAAAAAAA  
AGAAAAAGAAAAAAGAAAGGAAAAGTGCCAGGACGCTCGGAAGCGCGTGATAA  
ACCAAATAATTTATTAATTTAACTATTAATCTATCGATATAAATGAAATTTGCGCGAGAC  
ACACGCGAGGGAGTATGTATGTATAACGCAATGGTGACCAGATGGCGGAACCGTGAAA  
GTTCTGGACATTTTGGACACCCGGTGCACGAGACACGCGCGTGTTGACGCGCGATCG  
GGAGGAATGGAAAGAGGAATAGGAGGAGGCGGAGTGTGCTAAGTGTATGGGAGGATG  
CTATCTGTTTTCTGTTTCCTTTTTTTTTTTTTTTTTTTTTTCTCTGACAATGATCTCCG  
CCCCCGAAAGACGCGTGTCGTGATCGATGGACCGAAGCGGATGGATGGATGGATGGA  
TCGAACACACGTGATCGGGAAGAGTGTGCACGATCTCGAGAGAAAAGAAATTTAAAA  
AAAAAAGAAAAAAGAACGGGGAACGGAGAGAGTGCCGTGCTTTGTTTTTTTTTTTT  
TTTTTGTCCCCCCTTTTTTCGGGGAAGAATCACCATCAAGTGTAGTACATCACTTTGA  
AACGGAAGCTAAACCTACCCATCTACCTTACCTACCACCTATCGACGAACAACCTCGAA  
GAACAACAGCCACAAACAGGAAG

>novel\_circ\_001544

GGTTC AATTAATTAGAGAATAAATATAAAAGTTTAATTAATGGAATATTAGAAGTCTTTG  
AGTGAACAGCAAGTTACATAGCAGTTACACTCAACAGTTAAGTGAACCTTCATAAACTT  
CTACAGCGTCTAATTGCATTTATTGGCCCTTTGTCCCGTGAAAATTGAATTGGTCCCGCC

ATTAAGCACGACAGCTGTTCATTTCGATATCCGGTAACTTACCCGCGAATTTTAAAATTCC  
TTATCAAATATATATATATATATAAATTTCTATCAATATTTGATATTCCATTTCATAATGATA  
GAAACATTTCATTTTAATGAAATTCCTAATTATATTAAATTAATTCTAAAATATATTATTTTT  
AGAAAGAGATTAAGATTGTCTATTTTTTCAAAAATACTTCAATATATTTATCCACTTCTATA  
AAGAATAACGAAAACCTTTAACCAAAACTCTTCAAGAGCCTCTTAAAATCGTTTTTCATAC  
GCTTGCAACAATAGAAAGTAATGGCACCATCGGGAAATTCGATGAACTCGTGAATCCC  
AAAGGATTTCTAGGAGAGAACGAAAGAAG

>novel\_circ\_001546

GCTTATTCCACAAGGCTATCGCGCAGAGCGGAGTGGCGATTAATCCTTGGGCTATAATA  
ACGAAAGAGCCGAGCAAGTACGCGTACGAGTTGGCGGCAAACTTGGCGAGAAATCG  
ACTGATCCTAAAACCGTGCTCGAGTTCTTGAGGACCGTGGACGCGCAGAACTTGCAT  
TTACCGAGACACAGATTTTAAAGACAAACCAACCTTATGTAACATTTGGAACATTTGCA  
CCTTGTATTGACAACAAATCCCCGAATCCATTTATGCCTCGACATCCCTCGGAAATGATG  
AAAACAGGTATCAAAGTACCCTTACTGATTGTTATAACGAGAACGAGGGAAGCAGCG  
TTATTAACTTTT

>novel\_circ\_001547

AAAAAATTAAAAATAAGTAAAGAAGATAATTCTAAATTAGAAAAAGCAAAACGAGAA  
GGAAATTTACATGAAGCTTTATTAGATAGAAGAAGCAAAATGAAAGCAGATCGATATTG  
TAAATAAATTTTGTATACTATTATATTATGTATCTTATAGTTAATTATTATTTTCATAAAATGTA  
TATTTATTAAAAATATAAAAAAATGATTATAAGCTATAAACAAAAA

>novel\_circ\_001548

TAGATGTTGCCGTCCCTGGCGAAGCACGTCAACTCGGCGGCGAGAGGCACACGGCAG  
TGGCAGCAACGAAGACAGCCGCAGTGCCACGCGCGGTCCGCAGCCCTCAGGTACCAT  
CGCTCGGCTATCTCCCTTCCGCAACCCCCGCAACCGAGGACCCCGTCGGTGTGTTGTTGTT  
CTCGCCGCCTCCGAGCTGCCGGTTGCTGACGGCACCATCCCCTGGCGGGGGTGTGCTG  
CTCCCGCACCCGACTTCCTTCAGCATCTCGAGACGGACCGCCGCGGCCACCGGCCCAT  
TCTGCCGCACGCAAATCTCCTCAGATCTTTGCCGAAATTCGCCAAG

>novel\_circ\_001549

CCGGCCAGCTCGCAGGAGCGTGGCAGCGGCTTGGCTGTGGGGCGTCAAGGGGGGCCC  
GGCAGTGCGGGGGGGCCCCGGAGCAGTGGACCAGGCGAGGGACCTAAGTCCCTGCCTC  
CCTGCGTCTATGGGCGACGCTGCACGACCCACCACCTTACCGTGCAGTCCCTCCTGCCG  
CCCACCATCACGGGCCCCATCATACCCCCTACATCAGACCCACTGCGGAACCAACAAT  
AATTGCTACGACGGACCCACCACCCCTACGACTCTAGAGACTACGATTCCCCCGGAG  
GTGGGCAAGAGTACAGGAACAGCAGCAGCAACTTCGAGAACCCGAGCGACCTGAGC  
ATGCCCCCGCAAACGACCCACCACCACCATCATCACCACCATCACTCGCATCTGCACC  
CGCAGACTCACTCGCAGGAACAGCAGACCACGGAACACTTGCACGCCATCCCGAAAC  
TGGAGCCGCCGCCACCCCGCCCGCGCAGTCGGACGACGTGCCGGGGGTGGTTTTCG  
CCGGATGCGGCCTCCGGATATCCGACAGGTTTTACCTTCAGGCGGTGGACAGGCGGTG  
GCACGCGGCCTGCCTTCAGTGCTCCCACTGCCGCCAGGGCCTCGACGGCGAAGTCAC  
CTGTTTCAGCAGGGACGGAACATTTACTGCAAGAAGGACTATTATCG

>novel\_circ\_001550

CAGCCGGCCAGCTCGCAGGAGCGTGCGCAGCGGCTTGGCTGTGGGGCGTCAAGGGGG  
GCCCCGGCAGTGCGGGGGGGCCCCGGAGCAGTGGACCAGGCGAGGGACCTAAGTCCCT  
GCCTCCCTGCGTCTATGGGCGACGCTGCACGACCCACCACCTTACCGTGCAGTCCTCC  
TGCCGCCCACCATCACGGGCCCCATCATACCCCCTACATCAGACCCACTGCGGAACC  
ACAATAATTGCTACGACGGACCCACCACCCCCTACGACTCTAGAGACTACGATTCCCC  
CGGAGGTGGGCAAGAGTACAGGAACAGCAGCAGCAACTTCGAGAACCCGAGCGACC  
TGAGCATGCCCCCGCAAACGACCCACCACCACCATCATCACCACCATCACTCGCATCT  
GCACCCGCAGACTCACTCGCAGGAACAGCAGACCACGGAACACTTGCACGCCATCCC  
GAAACTGGAGCCGCCGCCACCCCGCCGCGCAGTCGGACGACGTGCCGGGGGTGGT  
TTGCGCCGGATGCGGCCTCCGGATATCCGACAGGTTTTACCTTCAGGCGGTGGACAGG  
CGGTGGCACGCGGCCTGCCTTCAGTGCTCCCACTGCCGCCAGGGCCTCGACGGCGAA  
GTCACCTGTTTCAGCAGGGACGGAACATTTACTGCAAGAAGGACTATTATCG

>novel\_circ\_001551

TAAAGTTAGAAAAATTA AAAAGTGATTTTCCTTCTACGAAAAATATATGTATATAAGTCTC  
TTTAGTTAGCCTTTGAAATCTGCGTCCTTCGAAATATGAATAAAGTAGCAAGCAGGAAT  
AAGAATCTTCCACTTAAGAAGATGAAGTTTTTAAGGGGAAAATTGTTTAC

>novel\_circ\_001552

GCAACTCTTCCGCGGATGGCAAGGTGCAATTGCAGATCATCTGTCAACCGGAGCAGCA  
GCACAGGGCTCGTTACCAGACGGAAGGCTCGAGAGGGGCGGTGAAGGATCGTACCGG  
GAATGGATTCCCGATCGTGCGGCTGGTTCGGCTACGACAAGCCGACCACGCTCCAAGTC  
TTCATCGGGACGGATCTCGGCCGCGTGGCGCCCCACATGTTTTATCAGGCGTGCCGCGT  
GAGCGGGAAAAATTCGACGCCGTGCGTGGAGCGGAAGATCGACGGGACGATCGTGAT  
CGAGGTGGACATGGATCCGGCCAAGGACATGATAGTGACGTGCGATTGCGTGGGCATT  
TTGAAGGAGCGTAACGTGGACGTGGAGCACAGATTCCCGCAGGAGGCTGGGGTGCTT  
CAGGGGCGCAGCAAGAAGAAGTCGACCCGTTGCCGTATGGTTTTTCGCACGACCATCA  
CCCATCCCGACGGAACGACGGAACATTGCAAGTTTGCTCGCAGCCGATAGTATGCAC  
CCAACCGCCGGAATACCGGAGATCTGCAAGAAATCGCTCACGTGCGTGCCGTGTACC  
GGCGGATTGGAGTTATTTATACTTGGGAAGA AACTTTCTGAAAGACACGCGGGTCGTATT  
TCAACTGGACAACGACAATCTGTTCGAGCAGTTTGGAACCTCACTGGGAATGCGCTGTT  
CTGCCCCGACAAGGAGTTCCTGCAGCAAACGCATCTGGTCTGCGTGGTGCCCGCGTACA  
GGCGACAAGATCTGGCCCCCTCCGAAACGGTTAGCGTTAAATTGTACGCGGTCTCCTC  
GGGGAAGACTAGCGAGCCTCACACGTTTCTCTACACCGCCGCGTCTACGCCACCCGAG  
CCATCTGTGGGTAAAGTCGAGCCGATAACACCGCCTCTGTCCACCACGAATGGCGAGG  
TTGCGCTAGCAACGTCTCCTGTAGCGGTACCCCTGACCAAAGGTGTATACCGAACA

>novel\_circ\_001553

ATCGATCGTAGACGAGCATAAAAATTTAACGAATCGAGATCGAGGGGATGGCAACGTT  
TTTCTTTAATCATCCGTGACCCGAAATCCAAGGTATTTGAGAAGTATCGTTTGAATTGCA  
CGGATGGAAAGGAACGGCCGAGCCACGGATGGAAACGGGCACCGTGGAGAATGGAA  
AACGGGCACAACA AACTCGCGACCCAAAAATACTTGATAAAAATCACCACGGTCGTTAC



GAGGAGCGCAGCTGCAAGCATCACCAAAGAAAACACACGGAAATAGAGCGGACACG  
AAGCTAGAGCCGTACACTTTGAGCGCGCGCGAGCGAGCCTGAGCCGCTCGTGTACC  
GATCGAGTGGATCTAGAAGGAGGAAGCGAG

>novel\_circ\_001555

TGTCGCCCCAACTGAAGGAAGCGATCGAGAGGGAATGCGGCGTGGTCTCGGCGCACCA  
GGTGCTGCTGATGAGCGGAGGCGAAAGCCTGGAACCAACCGCGCGTGTGTGCTCCTA  
CTCGGCCGGAACCGACACGAATCCGATCTATTTGTTTCAGCAAGGCCGCCATTGAGAGC  
CACCTTCCACCCACGCCGAGCATAGATTACGGTTCCG

>novel\_circ\_001556

AGGAAGTGCTGGGCTCCCCGGTCGCATTCTGGATCTCGCCCGACGGACGACACCTTGC  
TTTCGCCACGTTCAACGACACCAACGTCCGCGATATCGTGATATCTAAATACGGCTCCC  
CTGGAAACTCGAGGGATCAATATCCGAACGAGATCAGGATAAAATATCCGAAAGCGGG  
CACCACGAACCCATTTCGTGTCCCTGAGCGTGATCGACTTGCACGATCCCTCCTCGAAAT  
TGATCGATCTTCCGCCGCCTGTCGATGTCGTTGGAGC

>novel\_circ\_001557

GTAATACACTCGAAAAGAATGAAAATAAAAAATTTGGAAGAACAGAAAATTTGGATCT  
AATTGTGGGTTCAAATGTAAAAGTTCTTTTGGATTCTGATGTACATTATGGGATTATTCG  
TTGGATTGGAACCCCTCCTGGTATTACTTCTGGTAAATTGATTGCAGCTGTTGAATTGGT  
ATGTATAACAAAAAACAATTCTAGAAAATTAATAAAAATACTAATTATTTTTTTTATA  
GGATGATAGTCATCCATCAGGTACTGATGGAACATTTAAAGATGTAAGATATTTCCATTG  
TCGGCCATATAAAGCTATTTTTACAGATCTCGAACAATGTTACGATATGATGCCATGGT  
AATTGCTATTATTTTCATGTATGCTTTTTAAATTCGTATAAAAAAAATATATATATATATT  
TTTTTTATAGACAAAAGTTGATGATTCAACAACATTGATAAATACAGATAATTTCCGAAA  
TATAGAAAGTTCGGTTATTGTTGGTATGGTACGTCCCTATCTCTGTAAAAGGAACTTGGA  
AAGTATTTGTGGAATAATAGAGGAATTCAAGGTCATCACAATTCGTGTTATTTGGATG  
CCACTCTTTTTCAGCATGTTTACATTTACTAGTGTTTTTGATAATTTATTATTTAGGTATTAA  
TTAAATATTTATTCTCTTATTCTTTATTTTTTATTGAAAATAAAATTAAAAATAAATGATAT  
TTTATTTTTTCAGACCACCAAATGAAAAAGATTGTCCGCAATACGAAGAAGTACAAAGA  
GTATTACGTGAAGAAATTGTAAATCCACTTAGAAAAAATATGTTTGTAAGAGCAGATCG  
AGTGATGAAACTCCGAACTTTACTTGAAAAATTATCATCTGTATCCGGACTIONACTAGCG  
AAGAAAAAGGTATTTTCATTAATAATATATTTTCGATATTTTAAGAATTAAAATTTTAAATTA  
TTATTATTATTACTATTATTATTATTAAATCTGTACAGATCCTGAAGAATTTTTAACTT  
CTTTGGTTGCACAAATTTTGAATGCTGAACCATTCTTAAATTAAGTTCTGGTCAAGAT  
GCGTATCATTATCAACTTTTTGTTGAAAAAGATGATCATTTAAATCTTCCACTIONGTGCAA  
CAATTATTAGAACAAAGTTTTCTTACAAGTAACATAAGATTGAAAGAAGTTCCTTCATG  
TCTTATTATACAAATGCCACGATTTGAAAAATCATTTAAGATGTATCAAAAAATTCAACC  
TACATTGTTACTTGATGTAACAGACATAATTGAGGATTGTAGGTATTGTTATAGTATATAT  
ATTTATATATTATTAATATGATATATTTCAATTATTTCTTTATTATTATCTTTTATATACAGCTC  
CAAGACAATGTACTGTTTGCGGAAAATTAGCAGAATACGAATGTAAAGAATGTTTTGG  
ACAATGTGGTGTGGACTTGAAAGTATTGCATTTTGTGTTGCAATGTTTAGAAAAGGTAA  
AATAAAGAATATTTAAAAAAGTATAATAGATAAAAAGAAAATTATTTTAAAAAATTCTTTT

AGGTACATCGACATGAACGAAGAACAATCATGAACCAAAGAAGCTTGTAGTACCAAT  
GGAATTCGCTATTTTACAAGAACATTGTCCAGTTCCACGATTGTATCTTGAATTGTCGGC  
AGTAGTTTGTATCGAAACCTCCCATTATGTATGTTTTGTAAAATGTGGTTCTGGCTCTGA  
AGCTCCATGGTGTTTTTTTGATTCCATGGCAGATAGAAAAGGTTTCAATCACATTTAATA  
AATTCATATATTGTATCATTATTATTAATTTATAAAATTTTCTTCTACTTTTAGGAGAACA  
AAACGGTTACAATATACCGGAAATGGTTCATGTCCGGATTTTCCATATTGGTTAAGCGA  
AGAAGGTGGAAATTATTTAACTGAATTAACAGACGATCGTCATCTACCTGAACATGCAA  
AACGACTGTTATGTGATGCATATATGTGCATGTATCAATCTCCAGATGTTATGATGTACAA  
ATAAATTAAAATGCCTGATAATATAGGTAAGTTAGGTTTAAAATTATTATTTTAATAAAA  
ATAACATAATGTTTGTGCTTATTGCTTTATTTTATGTAAATTTATATAATAATAGTAAAATTT  
ATTCACAAAAATTTTATACTATTAAAGATAAAAAGGAAAAAGAAAAAATTGAAAATTTGAT  
CAGCTCATAAAGTTTATTCAAATGCAGAAAAACATGTAATCTTAAGGGAACATAAGGTTA  
TACATATATATTATACAAATTATATGAAAATCACGATTTTCAATCAAAAACCTAGTAATCTA  
ACTCGGGTATAGTACTGGTTTTTAAATTCACAAGATATATTCATTCATATATATATATTTTA  
TCAGTGACATAAAATTAATATTTTTTCATATTATACGAAAATTATTGGAAAATTTACTATAC  
TATTGTAAAATTTATACACATATTGCACGATCTAATTAATCATCAAATTTTATCAGTTTGTT  
GAAAATGAATTCAAAATATTGAATTAATATCTTGATAATTTATAAAACTGAATATTGTATT  
GATACATTAGAATATATATTTGTCAAAAGTCATATATGAGGTATAAAATTTTATACGAAA  
AGCTTATCAAAATGTTATCATATGACTGATTTTTATAGCAAAGAGCACAAACAATTAATA  
AATCTTTTATAACTTAAAGATATAATGACTAAGATTAAGAAATTCTGCACTTTTAGATCTA  
TTGTTGCTCTAATAATTTTTGTACTCCCATTTTATAATATTAGATTAAATCTGTTTTTTAAT  
TTAATTATTTAATAATTATAATAATCTTAAAGAAATCTAATAGAGCAACTTAGCACAACA  
ACAACAACAATTTAAAATCCACTAAGTTCATTACGTTTTTATATAAATAATGATAAAGAT  
CTTTTGTATTTCTAAACTTGAATATTTTACATAGAATGAAAATCTAGATCTTAGATTTGT  
ACAAATTTAATTAATGTGTAGCAGATTTATATACTTAATGCATCTCTGATAGTAAATATGT  
ATATGAAAATTATAAAGTCACAAAGAAAAATTGTTTCAAAATCTTACAAAATTTTCAA  
ACTATTAGATTTTTTCTTGACTACAATTACTTCAATATCATATAAAAAAAGATAAAAAA  
AGAATTTTTGTTAGACTTAAGTCTGAAAGAAATATTACTACAAGTGAAAATAAACGAAA  
TAATTATGAAAAATTTGAGATGTATCATTGTACATAAGTTATGTAATAGATAAAATTTAAT  
GTTCAATTCATGCCTTTGTGGCAAAACTAATAAAGATAGTGACGAAGTTTGTATAAACAT  
GTATTATGAATTTAGTATCTGTCTTCATCTTCATCCATGGCAAAGTCACTGCCAACACCA  
GAATCTAATACGTAGAGAGGACTGTAAACATATACATAAAAATAATAATAACTAAGTAA  
ACAAATGTGATATTGAAATATAAATACTTACTTTATTGCTCTGCATGGAAAAAACACAAT  
GCGTTTTAGCTTTTTTATTATAGAAGAAATAATTAAGACCATAAGCATCCATCTTCTCC  
AAATGGATCAGATGCAAAATCTGGATTGTAACATAAAATTTTCATATTCTCGATTTATTT  
AATATATTTTGCAACTTAATAACTTCTATAAAATTAGAATAACAAATATATTATGTTGAG  
TATAAAATGAATTCAGAATTTACCTATAAATATCACATTCGTTTAATGATATTTTCGTCAT  
CAATGGCAGCCCAAAGTGCCGTTTCGTAAAGTACGATAATGGTCTCCCGCAGTTGCACT  
CAAATTACTGTCTACAGCATTTCATGACCCATTGCAAGCTTGGCTCTTTACTGAATTCATG  
ACTTTTAGCATCAGAAAAATCATAATCTGGATGAAAAGCAGAATTCAAAGTAGCAATCA  
AATAGAATAGTGTTTTTCTACTGATTGTATCACATAATGGACCATCTTCATCACCAGAAA  
TACTGCGACTATAGCAAAAATATATCTATTAAATCAATGTACAGATAAGGTATTATCAAA  
AATATTAATGTATTTTGTAAAGGTATTCTAGATTTTTTATAACTTTTTTACATATATTTAAACAT  
GAATTTTATTCCATATTAAAGAAGATAATATTCATATTTTATAGATTTATTGTTTTATTACATC

TCATTTTAAATTTTAAATACCTAAAGTATCCTTGAGCAGGTGATGTTTCCTAATGATGTTTG  
TGGTGGTGATAAAGCTTGAAGATCATGTGGAGTAAAACCTTGTTCTGCATTGAAACGTT  
TATATAGCTGTTTATCATTTCCAGCCATTTTGCAAGAGTAGCTCTCTATTCTGTGGATGAA  
AAAAAATATAATGTTTAGGATTATTTTAAAGGATAGAACAGTTCAATAAATATTGATCCA  
ATTATCTTACCTGCCTATTATTTTGCTGTCTCCAGTCTTGATGGACAAGGCACTGTTTATG  
GCTTCAAAACGTGTACTCTCCAGCAATTTTCATCTTGTCAGCAGTAGTTTACTTGTACGT  
TGTGTAAGAACAGTGTCTCTGTACTGGATACTCTTGGTGCATCTCTCAGTGAAACACTT  
TTGTCATTAACTCCATTAGATAGGAGTTGATGACCTTTAATGTATTTTTCGACTAAACT  
TGACCTCGTTTCTCAGTCGGACGGCCAAGGGATGTTCAATATAATCGAAAATTTAAAAA  
ACTTCTGCGACATCGAAGACTTATTGAGTCTTTGTACATCTTTTTTATATATATGAAAATT  
CCTTTCCTCTTTGAGTGTACGAAATTAATCTTGGACGTAATGATTTTTCGCGCGGCGCCG  
AGCTTGTACATCACAGATCTCTAATTAAGATATCGAGACGAATATACGTCCGTGCGCA  
ATCCGATTTTCAAGCAATCGGTTCTTAGATTAACTTCAACTGTGATCAGTGTTGGCTTCTC  
GTGCTACGCAAATGACGTGCAAGTTAAAGAGAGGGAAAACGGAGTAAAGGATAGGCG  
ACTACCCTTGAGAAACAAAAGACGCCGTTTTTTAGGTCAAAAACCTCGCGCTAAACAGA  
AAGTTGATGGCAAACGTGCTATAAAGTCGACAGAAAACAATGAATCGGACTTGTATTAT  
TGGAATCAGCTAAACAAAGTGACTAAGAAATGTTATATGTCCGCTACTGATGAAAAC  
AATCCATAATTACAGACATTGTTGTCACTATCACTCGAATTATCACGGTCACTGTTAAAC  
AAAAGCACCCAAAATTCAATTAAACTCCGATGCAATAATCAAAAATCGACAAACTTCA  
ACTCTTTTCGCTCCTATTTTCGCACCGTTTACTAATTATTTGCGTTTCGATATTAGTACATCT  
ATATGCAACAACGAATATATGCGTTCTACGTGACAGAAATAGCACAGCAAAGCGTCTTG  
AATCCTTCTCTCTCAGATTCTGTTTCTCTTTCTTTTACTCTTTTATATCACTTCCCCTCGCT  
TCACCCCTTAAACCATATATGTTTTTAGTGTGGATATGTACATGAATTTTATTCAGCCAAT  
CAAAAGCCAACGATAAAGATGTGTATGTTAGGATACGATGCAACGAGTCGTATACTACC  
TTTGGATATGTATAGAGTTGCGTATATGATTCAATTCAGTTCGCGTATTCGGTTTGATTCT  
TAACCTTGACAGAAATGCTGATAGGAATTCGAATTTGTTGGTAAAATGTCAAATCGTTGGG  
GCAGCGACTATGTGGTTACCGAGCACCGTGATTTACAGGCTAATACTATGGCCGTGGAT  
GCGACGGGTAATTATGTATTACTTGCCGGACGCAGATGTTTTGCGGTAAAACACCTTGA  
CGAAAGTCTTGATATATTAAAAAAATTTCAAAGACAGAGTAAATATGAAGTTGGCTCTG  
CAGAATGGAATCCTACAAGTATAAATTGCCATCTTTGCGCTGTATCGAGCAATACACGTA  
TTGAAATATTATCTCTTATTGGAAGTGGTAGTTATGACTTACAAACAACAATAGTTTAA  
AAGCACATACAAGAGTTGTGAGTGATTAAACTGGCATCCTAAAGAACAAGATATCATT  
GCTTCTTGAGTATTGATACATTTATACATATATGGGATATAAGAGATCAAAGACGGCCTT  
GTTTATCTTTATCTGCAGTTGCTGGTTCTTCTCAAGTAAGATGGAACACTCTTCTCCTA  
ACATATTGGCAACAGCTCATGATGGAGATATTAATAATATGGGATCAAAGAAAAGGAAAT  
AGTCCTATGCAATATATAGCTGCTCACCTAACAAAAATACATGGTTTAGATTGGTGTCCA  
TTTCAACAAAATCAATTGGCAACATCTAGTCAAGATTGTACTGTGAAGATTTTGTATC  
AGTAATCCACGAAGAGCTGAAAGCATTTTAAACAACAATTCACCAGTATGGAGGGCAA  
GATATACGCCATTTGGAGAAGGACTGGTAACAATAGTAGTACCACAATTACGACGAGG  
AGAAAATAGTTTATTATTGTGGAATACAACAATCTCAATGCTCCTATTTTACTTTTGTA  
GGACATACAGATGTTGTTCTTGAATTTCAATGGAGACATCAAAAATTAGAAAATAGTGA  
TTTTGAACTAATCACATGGTCAAAAGACCAATGTTTAAGGATATATAAAATTGATCCATT  
TTTAAAAAAATTATGTGGACATGGTATAGATGATAGTACATCTATTTTACTCAGTATTCT  
GAAGATAATAATTTGAGAACATTACAATCTGTCCAACAATTACAGCTTAATGATAGTCA

AACTGATCGCGAAATGAATTGTATGACAACAAAAGTAGATGAACCTATATTAAATTCTG  
AAGCAGATGTATATATTGAAAATAATAAAGAAATATCATCTCCTACACAACCAAAGACT  
CTGCAACAAGAATTTTCATTAATAAATATGAACATACCAAATATAGAGGTCAATGCAATG  
GATGTTGTAGAACGTAGTTGTACAGTAACAGCATCTAATAAAAGTTATAATGTGATATTG  
AAAGTAAATTTCCCTCCAAATTATCCATACAGTGCACAACCTACATTTCAATTTTGTCT  
GGGACAACAATTGATAATGCAACATTGGCAAAATTTGTTGAAAGTTTAAAAACAACTG  
CTCAACAACGTGTTAAAAAAAACAGATCATGTTTAGAACCTTGTCTTAGACAATTAATT  
ACAACATTGGAACAAACATGTAAAAAAGATGAAAATGAAAGTACTCATTTAGGATATG  
ACATTCAAGACAATGCAAATTTTTTAAATTCTTCTAATATGTATACGAATTATCAAGATGC  
CTATATACCATTTCCTAGAACATCTGGTGCAAAGTTTGTGTGTAGGTATACTTGTATGT  
TTTGGTCGTGCTTCATATACGAGAAGATCATCTATGAAGCCTGAGTGTACAACACCTAG  
AGCACTTTCTGCATTAGGAAATGGAATAGGCAGTGCAGAACATTTTATACATATGTATCC  
AAATTCTTATGTACAGTCAAATGATAACATTCCAATTAGTTCCTTTTATTTTCAAGACCG  
AAAAATGAATCGTGGATTACATAATACAAATAGAATGATCTATAGATCATGTTGTAAAAA  
TTATCACTTTATGGTGATGATATATGATGCCTCTTCATTATTTTTCGTTAATAAAGAACTTG  
CCGAAAAATATGTTATTAATATCACCGATATTCCGGCAATGTGTCAATATAATGCAAATAT  
TGCTGCATCATTAGAACGTGCTGATTTAGTTCAAGCATGGTGTTTAGCTGCTCTTGTGAT  
ATCGCAACCAATTTCAAATGTTGGACAAAATTCATGTCAGTCGCCTGACATTGATGCTC  
CATGGCATCTGCATCCTTTTGGTCAAATTTAATTCATTCTTTAATACAGCATTATGCTAA  
ACAATCAGATATTCAAATGGCAGGAATGCTGAGTTGTGCTTTTAGTTATCGTTCGGAAA  
ATCCTGACGTTGCTCAAACACGAATAAGTAGCAAATCCATTAACATCAGT

>novel\_circ\_001558

AGAAAGTGTTGATAACCAGGCTGACTACGCAAAAGTGGTTGGACGTCGGGCCAAATT  
GGACCGAGGACGAGTACAGGAGCGCCCATTCGAAGATGGTGTACGAGTACAGGGTGA  
CTTGCGTGGCGCATTATTACGGGAAGGGTTGCGAGAACCTGTGCAGGCCGAGGGACG  
ACAACCTTCGGTCATTACAGCTGTAGCCCGAGCGGGGAGCGCGTATGCCTCTCTGGATG  
GAAGGGCGACTACTGCAATACCC

>novel\_circ\_001559

GTGATCTTTTACGACAGCGACTGGAATCCAACAGTAGATCAGCAAGCTATGGATCGTGC  
TCATAGACTAGGTCAAACGAAACAGGTTACGGTATATCGATTAATTTGCAAAGGAACAA  
TCGAGGAAAGGATATTGCAACGTGCTCGAGAAAAAGCGAGATACAACGCATGGTAAT  
TAGTGGAGGGAATTTTAAACCAGACACTTTGAAGCCTAAGGAAGTTGTTTCCCTTTTAT  
TAGATGACGAGGAAATCGAAGCGAAATATAGTCAACGGAGCGAGGAGAGAAAAACAGC  
ACGCGGAGGATGCCCCGCTTCGAGTCGAACTTATACCACAAGGAGAGGGAGCGGAAAA  
GGAAGTTAACCGCGCTTCCGGTTAAGGGCGATGTAAAGAAGCCTTGCCTATCTGATGC  
AAATGGAGATAAGATTGGGGATATTATTCAAATTAATTCTAATGAAAGTAGTCAAGCTAA  
TAGCGGTATTCAATCATATCAGATTAACAATCATCAGCAAATTCTCGATAATGCAGACGA  
TTACAGTGTGCCAACCAGTCCTGTAAATCAGAGGATGAGACGAGTAACGATGGTCTG  
GTTGTGATGTCGATGGTCCAGTAGGAGCATCCTCTGGTGATACTCGACAATCACGAGC  
GGGTGGTCAGTTTGGAGATCCAGCCAAAGTCAGTCGTCTCGATCATCATATGTCTTTCA  
CTAGTGGATCTAGTGTTTCGGATAAGGCCTACAATTCGTGGTACCAGCAAAAGAGGCAG  
ACCTCGTGGTTCTCGCAGAGGAGGGCCCCGTTGGTGGGAAAGGTAGAGGACTCCTTCT

GCTTCATCCACCATCTACGGGTCTTGGAAGTAGTCCACAGTCACCGGCATCTTTATCTC  
CGACCAGTACAACCTTTAAACGATCAAACCTTACAACATG

>novel\_circ\_001560

AGGAAAGAATAAATAAACTGAGACTCTATAATATGACAAGTGTGGGAGAAGAACGACA  
TTGGTTGCAGGATATTTTATTAAGTGATTTCGTCAGATAGTTCTGCTTCAGGGTCTGATAC  
AGATAATCCCATTACAGAAGAAGATTTTCAAGAAATGTTGAAGTATCATATACTTAGGA  
AAAAATATCAAGCACGTTTTTATCAAAAACCAGAAAACATTCAGTACCAATATTATAGT  
GCTGGTTTGCTATCCAATTATGACAGATTTTGTAGAACATCAAAAATTAATAGTTGGAAT  
AAAAAGAAAAAAGAAAAGAAACCAGAAAAGAAAGTTATGAAAATAAAAAAAGAAAA  
GATATCGCGTCATAGATCTTCTGAAGATTATCCT

>novel\_circ\_001561

TATGGTAGGGACAAGGGTCTATGTCGGTGGGCTTCCATACGGCACCAGGGAAAGAGAC  
CTTGAGAGATTTTTTCAGAGGCTACGGTCGATTCCGTGATGTCCTCATCAAGAACGGTTA  
CGGTTTTGTATCTTGACACAATAACTTTCAAGTTTTATTATATTTTATTATTTTATTGCTG  
ACCAAAATGTGTAGAGGGTAAAGTGTTTTACTTAAAAAATAACTTGAACCTCGTGAGTT  
GATCTGACCTACCTTGAGCCCTGAACACATTGGTACTGTGGCTGCTTAATGGAACGTG  
TGCTGGTTTTTCATCGATTAATCTACAAAATATTT

>novel\_circ\_001562

TTGTCTCCTGGACGAGACGGATCAGATACAGACATGGAACCTACTGCGTCACAGTCTG  
CGGATTGTGAACCTACGCCGCCAGTACAAAGACATGGTTCTAAAAGCAATTTCTTCCTG  
CCGCCTGTGGAGAATAGTGAATCTCCAGGCATCCTCCACCATCGCAACATCGCCATCC  
AATGCATCACACTAGAGGCAGCCCTCATCCAAGGCCAAGGTATATTATCAATACCTATA  
GGGGAATGAATGGCTCCCGAAGCCATACGCCCGATCCATTATCGCCAGAAGCAAGTGG  
GTCACCAGCTACAGCTTCTCAAAGAAGCCAAGGTCAGGGGGGTGCTAGTCCAACAAC  
ACAACGGATTAAAGCTATTGGAGTACCAACTCCACTTGCCATTTCCAGTCCAATTCGCA  
G

>novel\_circ\_001563

GATTCTTTTGGGTGCTAAGGATTACCAGACTTTCCTCAAAACTGCTGCATGGGCCCCGTG  
TCCATGTTAATGAAGGACAATTTCTTAAGGCATTTGTTGCTGCTGTATTAACCTCGTCAAG  
ATACTCAAGGTGTTATTTTCCCACCAGTTTATGAAATTTTACCTCAACATCACTTGATT  
CACGAGTTATTCAAGAAGCTCAAAATATTGCTATTCAAAACACTCAAGGAAAGAACAA  
TCAGCAAAACATTCTTATTCCTGTAACTATTCTGCACTTTTATCTCATGATGAACAACA  
GTTATCTTATTTCACTCAAGATATTGGTCTTGCTGCATACTATGCCCAAGTTAATCTTGCT  
GGATATATTCAAGAACAGAATCAACAACAACAACAGCAACAGCCTTTAACTCAGCAAC  
AATATCAACAACAGATTGTAGGAAAATATTTGCAACAACAAGCGGGCCAACAGGATCA  
ACAAGCAAATATTGGTCGCGGAGCTCAATATCTGTACCTTCATCAACAACCTTTTGGCAC  
GTTATGAACTTAATCGTCTTTCTAACGGACTTGGTCCTATTAAGGATATTGACTACGAAA  
ATGTACAAAGTCTCTATCAACCACATCTTCGCGGTCTCAATGGACTTGAATTCGCAGGC  
CGTCCTCAGAATCTTCAACTTCAATCTCAAAGGAACCAGCTTATCCAATATGTTGCCAC  
TTTAGAGAAAAGACTGAGAGATGCTATTGATTCTTGAAATGTGATTACCCCAACAAGGC

GTCTTTCTTTCTCTGTATCAACCACAAGGTATGAACATTCTTGGTGATCTGATTGAAGG  
AACTGGTAGAAGTGTTAATCCAAGGTATTATGGAAGTCTGCAAGCTGCTGCTCGCAAA  
CTTCTTGGAATGCTCCTGAAGTTGAAAACATTTGGGACTACACACCATCATCACTTGA  
ACTTGGAGAAGTTGCCGTCCACGACCCAGTTTCTATCAATTGTACAAGAAAGTTATGA  
ACCTTTATCAACAGTATCAACAATCTTTACCTGTCTATCAATACAATGATCTTATTCTTCC  
TGGAGTGACCATTCAGAACGTTGATGTCAGTCAACTTGTAACCTTTTCACCGATTCT  
ACGTCGATCTCGATGCCGTTACTGGTCACCAATCCCAACAGCAACAAGAAGAACAAAC  
TCAATCTCGTGTTAGAGCTCATCTCAAGAGATTGGATCATCAACCTTATCAATATAAAAT  
TGCAGTTCACAGCGAACAGAACGTGCCAGGCGCAGTTGTCCGTGTCTTCCTTGGACCC  
AAACACGACCATCAAGGCCGACCAATTAGTATTTCTAAGAATCAACATCTCTTTGTTGA  
ACTTGATCAATTTATCCAGAACCTCCATGCTGGTGAAAATACCATTATTAGAAATTCTCA  
ACAAGCTCCTGGACAGAGCCCGGATTGGCCGTCTACTTCTCAAATTCAACGAGGAGTC  
AATGCTGCTATCCGATCCCAGGAACCATTTCTACATCACTGAGCCACATCAAATCTTCAG  
TTTCCCTGCTAGATTGTCTCTTCCCAAAGGTCAGCCACAAGGTTTCCCTCTTCAATTCTT  
AGTTGTGATCTCTTCGTCAAATCCACTTAACGTCCCATACGGGCCAGTGATCCCTGAAC  
AAAGTTTGACTTATCAAGATCAACAGTACCAGGTGCGTAAGCGTTGAGCAATATCAACA  
ACTGAAAGAGCAAGGTCAAATTTCTCAAGTGGGCGGAGGAATTCAGCAAAAATGTAGA  
GGTTCTCCCTGAGAATTTGGTCAATGCTCAGCAACAAGTTCAAGCTGTTAGAACTATT  
ACGCCAATCTTTACACTAAATACCACGGACAATACCCGAACACCCAGATCCAGAATCCT  
GTAGGCCAGGGACAAGACATGACATACTCCGTTCAAGGTGTTGGAGTAGTCAATGCAG  
GCGGTTGGTTAGGACAGCAAGGTAATAGTTGGAGCCAGCAACAAGTGCAACAAGCCC  
AACAAGTCCAACAACAATGCAAGCAGCAATGGCAGCTGTACAACAGAGTCAACAGA  
GGCATCAGCATGCTGCTCAAATGATCTATGGACACCAACAATCTCATCATGGATTGCAC  
ATTAACCTCCTCCCCATCCTCTGTACAATCTGGACAACAACAACAATCCGTAAGTCAAGG  
ATTAGGTGTTCAAGGTGTGCAACAAGGTGTCCAAGGTGTCCAACACCTCAGGGCGTC  
CAAGGTGTCCAAGGTGTCCAGGGTGTCCAAGGCGTCCAAGGCGTCCAAGGCGTCCAA  
GGCGTCCCAGGCCTTCTGCAAGGAGTGCAACAAGTATTTGGACAAGGTGTCCAAGGA  
ATGAACGTCCCCTATGGCATGCAAAGAGGCCAAAGTGGTGGTCAAACGTGGTCAAAC  
CCCAAGTCCAAGGCGTAGCAGTCCCGGGAAGTGGCATCGTCGCTAGTGGACAGCAAC  
ACGCTGGTGGGTGGCAAAGTATCTACGCTCAACCTCAAACGGTTCAGGACCAGATTGT  
CAGCGAATACTACCAGAACAAGCCGATCTCGGAGGTGATTGGCGGTGCCATTTCCCTT  
GACGGCAAACCTCTCGGTTTCCCCCTGGACAGACCGTTGTCCCTCGGTGCACTCAGCG  
TTCTAACATTTTCGTCAAGGATGTGCTCGTCTTCCACCAAGGTCAACCCACCAATGAC  
ATCACTCAGTAAATATTCCTACGGTGAAGCACGCAAACAGTTGTTAGTAATGGGAATGA  
TTTATATGAGAGACTTAGAGATATTGTTAATTAAGAAAAAATTTATCGATGTGAA  
TTAC

>novel\_circ\_001564

GCGTCCAAGGCGTCCAAGGCGTCCAAGGCGTCCCAGGCCTTCTGCAAGGAGTGCAAC  
AAGTATTTGGACAAGGTGTCCAAGGAATGAACGTCCCCTATGGCATGCAAAGAGGCCA  
AAGTGGTGGTCAAACGTGGTCAAACCTCCCAAGTCCAAGGCGTAGCAGTCCCGGGAAG  
TGGCATCGTCGCTAGTGGACAGCAACACGCTGGTGGGTGGCAAAGTATCTACGCTCAA  
CCTCAAACGGTTCAGGACCAGATTGTCAGCGAATACTACCAGAACAAGCCGATCTCGG  
AGGTGATTGGCGGTGCCATTTCCCTTGACGGCAAACCTCTCG

>novel\_circ\_001565

GTAATAGTTGGAGCCAGCAACAAGTGCAACAAGCCCAACAAGTCCAACAACAAATGC  
AAGCAGCAATGGCAGCTGTACAACAGAGTCAACAGAGGCATCAGCATGCTGCTCAAA  
TGATCTATGGACACCAACAATCTCATCATGGATTGCACATTAACCTCCCCATCCTCTG  
TACAATCTGGACAACAACAACAATCCGTACTGCAAGGATTAGGTGTTCAAGGTGTGCA  
ACAAGGTGTCCAAGGTGTCCAAACACCTCAGGGCGTCCAAGGTGTCCAAG

>novel\_circ\_001566

GTAATAGTTGGAGCCAGCAACAAGTGCAACAAGCCCAACAAGTCCAACAACAAATGC  
AAGCAGCAATGGCAGCTGTACAACAGAGTCAACAGAGGCATCAGCATGCTGCTCAAA  
TGATCTATGGACACCAACAATCTCATCATGGATTGCACATTAACCTCCCCATCCTCTG  
TACAATCTGGACAACAACAACAATCCGTACTGCAAGGATTAGGTGTTCAAGGTGTGCA  
ACAAGGTGTCCAAG

>novel\_circ\_001567

TCCAACAACAAATGCAAGCAGCAATGGCAGCTGTACAACAGAGTCAACAGAGGCATC  
AGCATGCTGCTCAAATGATCTATGGACACCAACAATCTCATCATGGATTGCACATTAAC  
TCCTCCCCATCCTCTGTACAATCTGGACAACAACAACAATCCGTACTGCAAGGATTAGG  
TGTTCAAGGTGTGCAACAAG

>novel\_circ\_001568

CCCAACAAGTCCAACAACAAATGCAAGCAGCAATGGCAGCTGTACAACAGAGTCAAC  
AGAGGCATCAGCATGCTGCTCAAATGATCTATGGACACCAACAATCTCATCATGGATTG  
CACATTAACCTCCCCATCCTCTGTACAATCTGGACAACAACAACAATCCGTACTGCA  
AGGATTAGGTGTTCAAGGTGTGCAACAAG

>novel\_circ\_001569

TGCAACAAGCCCAACAAGTCCAACAACAAATGCAAGCAGCAATGGCAGCTGTACAAC  
AGAGTCAACAGAGGCATCAGCATGCTGCTCAAATGATCTATGGACACCAACAATCTCA  
TCATGGATTGCACATTAACCTCCCCATCCTCTGTACAATCTGGACAACAACAACAAT  
CCGTACTGCAAGGATTAGGTGTTCAAGGTGTGCAACAAG

>novel\_circ\_001570

GTAATAGTTGGAGCCAGCAACAAGTGCAACAAGCCCAACAAGTCCAACAACAAATGC  
AAGCAGCAATGGCAGCTGTACAACAGAGTCAACAGAGGCATCAGCATGCTGCTCAAA  
TGATCTATGGACACCAACAATCTCATCATGGATTGCACATTAACCTCCCCATCCTCTG  
TACAATCTGGACAACAACAACAATCCGTACTGCAAGGATTAGGTGTTCAAGGTGTGCA  
ACAAG

>novel\_circ\_001571

GTAATAGTTGGAGCCAGCAACAAGTGCAACAAGCCCAACAAGTCCAACAACAAATGC  
AAGCAGCAATGGCAGCTGTACAACAGAGTCAACAGAGGCATCAGCATGCTGCTCAAA  
TGATCTATGGACACCAACAATCTCATCATGGATTGCACATTAACCTCCCCATCCTCTG

TACAATCTGGACAACAACAACAATCCGTACTGCAAGGATTAGGTGTTCAAG

>novel\_circ\_001572

GTGTTGGAGTAGTCAATGCAGGCGGTTGGTTAGGACAGCAAGGTAATAGTTGGAGCCA  
GCAACAAGTGCAACAAGCCCAACAAGTCCAACAACAAATGCAAGCAGCAATGGCAG  
CTGTACAACAGAGTCAACAGAGGCATCAGCATGCTGCTCAAATGATCTATGGACACCA  
ACAATCTCATCATGGATTGCACATTAACCTCCTCCCCATCCTCTGTACAATCTGGACAACA  
ACAACAATCCGTACTGCAAGGATTAGGTGTTCAAG

>novel\_circ\_001573

CGAACACCCAGATCCAGAATCCTGTAGGCCAGGGACAAGACATGACATACTCCGTTCA  
AGGTGTTGGAGTAGTCAATGCAGGCGGTTGGTTAGGACAGCAAGGTAATAGTTGGAGC  
CAGCAACAAGTGCAACAAGCCCAACAAGTCCAACAACAAATGCAAGCAGCAATGGC  
AGCTGTACAACAGAGTCAACAGAGGCATCAGCATGCTGCTCAAATGATCTA

>novel\_circ\_001574

CCACATCAAATCTTCAGTTTCCCTGCTAGATTGTCTCTTCCCAAAGGTCAGCCACAAGG  
TTTCCCTCTTCAATTCTTAGTTGTGATCTCTTCGTCAAATCCACTTAACGTCCCATACGG  
GCCAGTGATCCCTGAACAAAGTTTGACTTATCAAGATCAACAGTACCAGGTCGTAAGC  
GTTGAGCAATATCAACAACCTGAAAGAGCAAGGTCAAATTTCTCAAGTGGGCGGAGGA  
ATTGAGCAAAATGTAGAGGTTCTCCCTGAGAATTTGGTCAATGCTCAGCAACAAGTTC  
AAG

>novel\_circ\_001575

GAAGAGATCACAACTAAGAATTGAAGAGGGAAACCTTGTGGCTGACCTTTGGGAAGA  
GACAATCTAGCAGGGAAACTGAAGATTTGATGTGGCTGTAAAAATATTATTAGATTATTA  
CAAAATTTATATAATAATCATTAATCATTTTCTTTAAGAAAAACAAGTTTGTCAACCTCA  
GTGATGTAGAATGGTTCCTGGGATCGGATAGCAGCATTGACTCCTCGTTGAATTTGAGA  
AGTAGACGGCCAATCCGGGCTCTGTCCAGGAGCTTGTTGAGAATTTCTAATAATGGTAT  
TTTCACCAGCATGGACTAAATATACAAAATAATATTAATCATAAACAATGATCGGATAT  
AAATAATTTATTAGAAGAAGAAACAATTGAAACTTACGGTTCTGGATAAATTGATCAAG  
TTCAACAAAGAGATGTTGATTCTTAGAAATACTAATTGGTCGGCCTTGATGGTCGTGTT  
TGGGTCCAAGGAAGACACGGACAACCTGCGCCTGGCACGTTCTGTTCGCTGTGAACCTG  
CAATTTT

>novel\_circ\_001576

CACAGCGAACAGAACGTGCCAGGCGCAGTTGTCCGTGTCTTCCTTGGACCCAAACAC  
GACCATCAAGGCCGACCAATTAGTATTTCTAAGAATCAACATCTCTTTGTTGAACTTGA  
TCAATTTATCCAGAACCTCCATGCTGGTGAAAATACCATTATTAGAAATTCTCAACAAG  
CTCCTGGACAGAGCCCGGATTGGCCGTCTACTTCTCAAATTCAACGAGGAGTCAATGC  
TGCTATCCGATCCCAGGAACCATTTCTAC

>novel\_circ\_001577

GTTGATGATCCAATCTCTTGAGATGAGCTCTAACACGAGATTGAGTTTGTCTTCTTGTT



GCTGTTGGGATTGGTGACCAGTAACGGCATCGAGATCGACGTAGAAATCGGTGAAAAG  
AGTTACAAGTTGACTGACATCAACGTTCTGAATGGTCACTCCAGGAAGAATAAGATCA  
TTGTATTGATAGACAGGTAAAGATTGTTGATACT

>novel\_circ\_001578

GTTGATGATCCAATCTCTTGAGATGAGCTCTAACACGAGATTGAGTTTGTCTTCTTGTT  
GCTGTTGGGATTGGTGACCAGTAACGGCATCGAGATCGACGTAGAAATCGGTGAAAAG  
AGTTACAAGTTGACTGACATCAACGTTCTGAATGGTCACTCCAGGAAGAATAAGATCA  
TTGTATTGATAGACAGGTAAAGATTGTTGATACTGTTGATAAAG

>novel\_circ\_001579

CTCCTGAAGTTGAAAACATTTGGGACTACACACCATCATCACTTGAACCTTGAGAGAAGT  
TGCCGTCCACGACCCAGTTTTCTATCAATTGTACAAGAAAGTTATGAACCTTTATCAAC  
AGTATCAACAATCTTTACCTGTCTATCAATACAATGATCTTATTC

>novel\_circ\_001580

ATTGTTGATACTGTTGATAAAGGTTTCATAACTTTCTTGTACAATTGATAGAAAACCTGGGT  
CGTGGACGGCAACTTCTCCAAGTTCAAGTGATGATGGTGTGTAGTCCCAAATGTTTTCA  
ACTTCAGGAGCATTTCGAAGAAGTTTGCGAGCAGCAGCTTGCAGACTTCATAATACCT  
ATTTAAAGTGAAGAAACGAGTAATAGAAACATAATTCTATAATTTTTTAATTATAGTTATA  
TATTTTTTACTGACCTTGGATTAACACTTCTACCAGTTCCTTCAATCAGATCACCAAGAA  
TGTTCATACCTTGTGGTTGATACAGAGAAAGAAAGACGCCTTGTGGGGTAATCACATTT  
CCAGAATCAATAGCATCTCTCAGTCTTTTCTCTAAAGTGGCAACATATTGGATAAGCTG  
GTTCTTTTGAGATTGAAGTTGAAGATTCTGAGGACGGCCTGCGAATTCAAGTCCATTG  
AGACCGCGAAGATGTGGTTGATAGAGACTTTGTACATTTTCGTAGTCAATATCCTTAATA  
GGACCAAGTCCGTTAGAAAGACGATTAAGTTCATAACGTGCCAAAAGTTGTTGATGAA  
GGTACAGATATTGAGCTCCGCGACCAATATTTGCTTGTGATCCTGTTGGCCCGCTTGTT  
GTTGCAAATATTTTCCTACAATCT

>novel\_circ\_001581

TTTTCAACTTCAGGAGCATTTCGAAGAAGTTTGCGAGCAGCAGCTTGCAGACTTCCAT  
AATACCTATTTAAAGTGAAGAAACGAGTAATAGAAACATAATTCTATAATTTTTTAATTAT  
AGTTATATATTTTTTACTGACCTTGGATTAACACTTCTACCAGTTCCTTCAATCAGATCAC  
CAAGAATGTTTCATACCTTGTGGTTGATACAGAGAAAGAAAGACGCCTTGTGGGGTAAT  
CACATTTCCAGAATCAATAGCATCTCTCAGTCTTTTCTCTAAAGTGGCAACATATTGGAT  
AAGCTGGTTCC

>novel\_circ\_001583

AGACGATTAAGTTCATAACGTGCCAAAAGTTGTTGATGAAGGTACAGATATTGAGCTCC  
GCGACCAATATTTGCTTGTGATCCTGTTGGCCCGCTTGTGTTGCAAATATTTTCCTAC  
AATCTGTTGTTGATATTGTTGCTGAGTTAAAGGCTGTTGCTGTTGTTGTTGATTCTG  
CTATTTAGAGAAATTGATTACATTAATTTATAATGTTTTCCAAAATTTGATTACATTATTTA  
TATATTTATTTATATATTATATACTTCTTGAATATATCCAGCAAGATTAACCTGGGCATAGTA  
TGCAGCAAGACCAATATCTTGAGTGAAATAAGATAACTGTTGTTTCATCATGAGATAAAA

GTGCAGAATAGTTAACAGGAATAAGAATGTTTTGCTGATTGTTCTTTCCTTGAGT

>novel\_circ\_001584

CCTTAAGAAATTGTCCTTCATTAACATGGACACGGGGCCCATGCAGCAGTTTTGAGGAA  
AGTCTGGTAATCCTTAGCACCCAAAAGAATCCTATAGAGGAGGGAACTTCTTTGCGA  
AGTTGGCTGATTGAATTGCTAAAAGTTGTACCTTGAGGTTGAACTAAACCTGCTTTTAC  
AGCACCTGCATAGTACATG

>novel\_circ\_001585

CCTTAAGAAATTGTCCTTCATTAACATGGACACGGGGCCCATGCAGCAGTTTTGAGGAA  
AGTCTGGTAATCCTTAGCACCCAAAAGAATCCTATAGAGGAGGGAACTTCTTTGCGA  
AGTTGGCTGATTGAATTGCTAAAAGTTGTACCTTGAGGTTGAACTAAACCTGCTTTTAC  
AGCACCTGCATAGTACATGACAATG

>novel\_circ\_001586

TCAACTTCTACAAAAAATTTCCCAACCAATCCCAAATCAGGAACTTCAAAATCTTGGTG  
CTAGTTATGACATTGAGAGTAATTCTCATCAGTATAAGAACCCAATCATTGTCATGTACT  
ATGCAGGTGCTGTAAAAGCAGGTTTAGTTCAACCTCAAGGTACAACCTTTTAGCAATTC  
AATCAG

>novel\_circ\_001587

GTCATTCAACTTCTACAAAAAATTTCCCAACCAATCCCAAATCAGGAACTTCAAAATCT  
TGGTGCTAGTTATGACATTGAGAGTAATTCTCATCAGTATAAGAACCCAATCATTGTCAT  
GTACTATGCAGGTGCTGTAAAAGCAGGTTTAGTTCAACCTCAAGGTACAACCTTTTAGCA  
ATTCA

>novel\_circ\_001588

GATCTCCTTAACAAACAACAAGATGTCATTCAACTTCTACAAAAAATTTCCCAACCAAT  
CCCAAATCAGGAACTTCAAAATCTTGGTGCTAGTTATGACATTGAGAGTAATTCTCATC  
AGTATAAGAACCCAATCATTGTCATGTACTATGCAGGTGCTGTAAAAGCAGGTTTAGTT  
CAACCTCAAG

>novel\_circ\_001589

GATCTCCTTAACAAACAACAAGATGTCATTCAACTTCTACAAAAAATTTCCCAACCAAT  
CCCAAATCAGGAACTTCAAAATCTTGGTGCTAGTTATGACATTGAGAGTAATTCTCATC  
AGTATAAGAACCCAATCATTGTCATGTACTATGCAGGTGCTGTAAAAGCAG

>novel\_circ\_001590

AAAAAAGAAAAAAAACATGCCACGACGTGGACGTGCTGCAAATCCTCCACCAAGGA  
CGTAAGTACTTTTTCTTCGAATTAGATTTATACGCATAATTTTTTGTAAACTATCTTTAATT  
ATTCAATGACGTTGCAGATTTTACTTGACGATATTCATAATCAAATTATATGATCGCTTTT  
TTTTTTATTTTTTTTATAATTATACATAATTTTATAATTGTGAAAAATAATTTTATTTTTTAG  
GGTTAGACGAACATCGGCTCCAGTCGCAACTCCTGCACAACCTCCTGCACATGCTCCT  
GCAGCAACACCAATGATGGCGCAACCTCAGCAGCCATCCCTCATGGGACAAATGGCTG

CTACTGCTGGAGGTGTCGCTATAGGTTCTGCTGTTGGTCATACTATTGGACATGCAGTA  
ACTGGTCTTTTCAGTGGAGGATCTAGTGAATCTGCTGTTGCACCTGCAGCACCTGCAG  
CACCTGCTGTAGCACAAAGTGCACCAGCTTCTGCTGCACCTATTGGTGGAGCTTGTGC  
TTGGGAAGTAAACAATTTTTGGAATGTGCTAATAATCAATCTGATCTTACACTGTGCG  
AAGGATTCAATGAAGCTCTCCGTCAGTGCAAAGCAGCTAATAGTAAGTTTAAATTATTA  
TTATTATTATATTACTTGTATTATATTAATGTATTATATATATTTTATGTACATTATGTTCTTTA  
ATTTTCAGATGTAGTTTAAACGAGCATCTTTCCAAAAACATTTGGATGATAGAAGAAATT  
TAGGAGCTCAGCATCATGTGAATTAATTTAATAAATCTTATAAAAAATTTGGATTTAATTTA  
CAATAAATAAAAAATTATGTTAAAAATTATTATTAATATGAATTAGACAATATCTTTGTATGTA  
TAGAAGTAAATAAATTGACTTCTATTTACA

>novel\_circ\_001591

ATGTCACAGAATCGGATAAGGTGAAGTTCGAAGAATCAAGAGATTTCGACGAGCGGATC  
GATTGGGGCGGCCGCGGTACCAACAAACGTGCTAAAAACAAGAAGAGACGCGAAA  
CGCAACAAGAATTCACGCATTCTTGGGTGGTCGGTGGCCCTCAAAGGGCACACGGGGC  
CCGTCCTCGACATGAATTTTCCAGTAATGGAAAATTCATCGCATCTTGTGCTGAAG

>novel\_circ\_001592

GGACCGTTCGTCTGCCTGAACAACGCCAGATACGGAATCGCTTGGGGCGCTTTGGGCG  
CGGCCGAGGCCTGCCTGCACATAAGCAGAGCGTACAGTCTGCACAGGAAACAGTTCA  
AAAGGCCGTTGGCCGCTAATCAATTGATACAGAAGAAGTTGGTCGAAATGATGTGCGA  
CATCTCGTTTGGCCTTCAAGCTTGTCTGAGGGTGGGCAGGCTGAAGGACGAGAACAA

>novel\_circ\_001593

AAAGCGCACTTTTCTGGAAAAATTGATCGAACCTGGGCGAGCGATAAAGTTGGGAGTT  
GGGTGCTCGATGATTGTATTTTAAACAAGGAAATTGTACGGCTCGGTGACCACGAGCC  
ACCTGCTCCACCACTGATAAGGAACCTACGCGCGCGCGCACAGAGCCTGTCTTCCCTC  
CTCCTTCTTTTTTCTTCGCATGTATATTCAATTACAATTCCGCAAAATGGGATGAATATCC  
ATTAGATGGCTTATCAATTTTTTTTTTTTCCAACCTGAGATAAACGATTCTTATCGCTCTTT  
TTCCTCGTTGTACATAGAAATTTGACGTCTCAGACGTCTCCAACGCAGTTTTCGCACCCC  
CCGTTTCTCAATCAATCCCCTCGACGGATTCTTCATTTCTCCGTTTTCACACCCCCCTGCG  
CTCGCATCATCCCGCTGTTGCGTGGCGCGCAACCGTGTCTTTTTTCCCCCTTTTCGT  
GCGCGGAACGACCGGATCGGAGCACAGTTGCGCCCCGACCTCGATCAGGACCGCTGT  
CCGCTCTCCCCCTTTTGCAAAATTTTCATCTCCAGAGTGGAAGGAGGAGGAGGAGT  
AAACAAACAAACTGTTTCGTGAAGGTGAACGAAAAAGGAGATTGTTTCCAACGAGAGA  
GAGAGATAGAGATAGAGATAAGATTTGGTAAAGCGGGAAGGAGAGTGGGAGGCAGGG  
AGGGAGAGATATTCGCCATGACAACGGACGGAGTGACGGCGGAGGACGCGGGACGG  
AAGAGATCGCGCATCTCGAGCACGCGAGGAAGGAGCTCGCCTCGGTGATGGAGAGG  
ATCGAGGGGACGGGCGGCCTGGCCGGCCGGCCCATCAATATTTTCGGGCGCGGCGGT  
TACTCGCGCGCTCGGCGAGGCGCGCTCGGTGAGCCGCCTCCTCCCACTCCTCCCAGC  
GACGGCCGGCAAACACCTGTGGATCCTAGCCCCGATCCTCGCCTCGATCCTCGGCCGA  
GCGGCGTGGAATTACGGGCAGGCCGCGCGCCACCACAAG

>novel\_circ\_001594

GTGAGAATCTTGTTGTTTCGGTGGCAGCAAGAAGAAGAAGGACGGACAACCTGTGC  
AAAAAGAGACGACCGCGTCGCGCACAACGACCAGTCCGAGAACCGAACCCGTCAGA  
GGCATGGAGCTCCTCTGGCAACCGGAGGTCGTCCAATCCTATCTGAAGCTGCTGCAGA  
CGTGCTCGAATCCTGAGACCCTCGAGGCGGCGGCAGGCGCGCTTCAGAACCTCGCAG  
CCTGTTATTGGCAGCCCAGTATCGAGATTCGAGCCGCTGTGAGAAAGGAGAAAGGGCT  
TCCCATTTTGGTGGAGCTGCTGCGGATGGAGGTGGACCGCGTGGTCTGCGCCGTGGCC  
ACGGCTCTCAGGAATCTCGCGATAGATCAACGGAACAAGGAGCTGATAGGCAAGTACG  
CGATGCGGGATCTTATTCAAAAGTTACCCTCGGGGAATAATCAGCACGACCAGGGAAC  
CAGCGACGATACAATCGCCGCTGTCCTCGCCACGTTGAACGAGGTGATCAAGAAGAAC  
GCCGAGTTCTCGCGATCTCTATTGGACGCTGGGGGTGTCGACAGACTGATGAACATCA  
CCAGGCAACGCCAAAAGTACACGCCCCGTGTTCTTAAATTTGCAGGACAAGTCTTGTT  
CACGATGTGGCAGCACCAAGAGTTGAGAGACGTTTACAAGAAGCACGGTTGGAAGGA  
GCAAGATTTTGTAAACGAAAACGGTGGCTGCGCGAAATTCAGGGCCTAATTCACCCAAC  
AACCGGAATAGCTATGATTGTAGCACGTTGAATCGACCGATGGCGAGTCAAGGGAGCA  
CCAGATACGAGGACAGAACGATCCAGAGAGCGAACATGAACTCGAATAACGTTGGTC  
GACCTACCATTTATCAGCCT

>novel\_circ\_001595

ACGCGTTCTCCAGGAGAAGGGCCCCGACATGCCGCAATACACCGGACAGAGTGATGC  
AGATTACCACGGAAGTAACGGCCAGGCGGATACCCATTCGTTGCATTTCGTCTCATTAT  
CTGTCCAGGAGGATCCATTACTCATCCGAGCCATAAGCAGCAAACACTACTCAACAAGT  
AACAAACGTCTCGAAGGTGGTGC GCGAGGTGTCACACATGGAGCCGGATCCGGGCGC  
GGTGAGCTACATGTCGGTGCCGTTGATGTCCCAGGACTACCAGCACGCCGACCGACGG  
TACCCGGCCGACTCCTACATGGTCGGTTTTCGAGCATTACGAGCCCTACCTCGGCTATCC  
GCCCCAACCAGGGTATCCAGGCCCTCATGGAATCTACATGCCACGCTCGCACTCCCCTC  
ACAGCCCCCACAGTCCTTCGGAGCACAGTCGTGCCTCGCCTCCGCATGAATACCTGCG  
CAAGGCGGCGCCGTACGTGGAAGGAGGTTACAACGACATCGATCCAGGTTTGAATCCC  
GCGTTGCAAGATCATTATCGTATTACTCCTAGTCCTGGTGGCCCTGGAGATCAATATGAT  
CAAATCAGCAACTCTTGGAATATGGATGACTCCGGCGAACCCTCTCAGCATCCTCATGA  
CGAGAACAAAGTGGCCTACGGTTACGTGTCCCCGTCCCCGTACGGGGCCGGTCGGATAC  
GGCCCTGGCGTCGGCGTGGGTCCGGTCCAGGTTCCCAGCGACGTGCCCCGGCTACGAC  
GAGGGCCACCCGGTCCCCTGCCCCGCGGGCGTGCCGGCCGGCATGTTTCGACGACGAG  
GTCCACCTGCAACGGCTGCAGTCGCGCCACCCTGTCTGTGGCCGGGATGGCGAGCCCCG  
TTGGACGACGACCAGAAGTCGATGAGATGGCGGGACCCGAATCTGTCTGGAGGTGATC  
GGCTTCCTCAGCAACCCGAACAACGTAATCAAGGCGAACGCCGCCGCTTACCTGCAAC  
ACCTGTGCTACATGGACGACCCGAACAAGCAGAAGACGCGTAGCCTGGGCGGTATACC  
GCCCCTGGTTTCAGTTGCTCGACCACGACAATCCGGACGTGTACAGGAACGCGTGCGGC  
GCGTTGAGGAACTTGTCGTACGGGAGGCAGAACGACGAGAACAAGAGGGCCATCAA  
GAACGCGGGCGGTGTCCCCGCGTTGATCAATCTGCTTAGGAGAACGTCCGACGCGGAC  
GTCAAGGAGCTGGTCACGGGGGTCTGTGGAATTTGTCCTCGTGCGAGGACCTGAAG  
AAATCCATCATCGACGACGGCGTGACGATGGTGGTGAACAACATAATAATCCCTCACA  
GCGGCTGGGATCCGAGCTCCTCGAGCGGGGAGACGTGCTGGTCGACCGTGTTTCAGAA  
ACGCTTCCGGGGTGTTGAGAAACGTGTCTGAGCGCCGGCGAATACGCGAGGAAGAAGC  
TGCGAGAGTGCGACGGTTTGGTGGACGCCCTCCTCTACGTGGTCCGATCCGCCATCGA

GAAATCGAACATCGGGAACAAGATAGTGGAGAATTGCGTGTGCATCCTGCGAAACCTG  
AGCTATCGTTGCCAGGAGGTGGAGGATCCGAATTACGACAAACACCCGATCCAATCGA  
CGGTTCAGAACAGGGTAGCCGCGCCCGCCAAAG

>novel\_circ\_001596

ATTCGGGTCCCGCCATCTCATCGACTTCTGGTTCGTCTGCAACGGGGCTCGCCATCCCGG  
CCACGACAGGGTGGCGCGACTGCAGCCGTTGCAGGTGGACCTCGTCGTCGAACATGC  
CGGCCGGCACGCCCCGCGGCAGCGGGACCGGGTGGCCCTCGTCGTAGCCGGGCACGT  
CGCTGGGAACCTGGACCGGACCCACGCCGACGCCAGGGCCGTATCCGACCGGCCCGT  
ACGGGGACGGGGACACGTAACC

>novel\_circ\_001597

AGGTGCTAAACGGTATCTGCAACGCGAGCAAGGAGGAGGAGAGGGCGGCGAAAAGGT  
GCAGGCTACCACGAACTATATAACGGTGTTGTCTGCAATGACACGATACTAGCGACAG  
GTGTCTTCAGCTCGAAGGAGCTTTGGATGCTTTCAAAAGCGTCCATACTGCATGACCTC  
AGCGACATGCAGCCTCAAATAAACGCGATCAAAATAGAGCACCCGCCGTACTACTGCA  
GCAGCTACACCCCTCCGTCCGCAGCCACGGCCGCGGATCATGCTCAGCCAGCGGCTAG  
CTTCA

>novel\_circ\_001598

AGGTGCTAAACGGTATCTGCAACGCGAGCAAGGAGGAGGAGAGGGCGGCGAAAAGGT  
GCAGGCTACCACGAACTATATAACGGTGTTGTCTGCAATGACACGATACTAGCGACAG  
GTGTCTTCAGCTCGAAGGAGCTTTGGATGCTTTCAAAAG

>novel\_circ\_001599

AACGAGAAGCTGGAGGTGAAACAGAAATGGGCCTCGCGGCTTTTGGGCAAGTTGCGA  
AAGGATATCACGCAGGAGTACAGAGAGGACTTCGTGCTGAGCATAACGGGGGAAGAGG  
CCGGCCATGTGCGTCCTTAGTAATCCCGATCAGAAGGGTAAAATGCGCCGTATCGACTG  
CCTGCGTCAAGCCGATAAGGTATGGAGGTTGGACCTAGTAATGGTGATCCTCTTCAAGG  
CAATTCCGTTGGAGTCGACGGACGGGGAACGGCTGGAGAAGACTGCGGAATGCGCTC  
AGCCGGGCCTCTGCGTCAACCCCTATCACATCAACGTCTCCGTCCGGGAACTCGATCTC  
TACCTCGCCAATTTTATCACCAGCCACG

>novel\_circ\_001600

CTCCTCCAGGCATGAATCCTATGAATCCAAGAATGAATCCTCCACGAGGACCAGGAAT  
GGGTCCAATGGGACCAGGAAGTTACGGACCTGGAATGAGAGGGCCACCTCCTAATAGT  
AGTTTAGGTCCAGGAGGTCCTGGAGGTCCTGGTATGCCACCAATGAGTATGGCTGGAC  
CAGGTGGTAGACAACAGTGGCAACCTAATACATCTACGCCGATGAATTATTCGTCATCA  
TCACCGGGTAATTATGGAGGACCACCTGGTTCAACAGGTCCTCCCGGTCCAGGTACAC  
CAATTATGCCCAGCCCACAAGATAGTAGTAATAGCGGTGGTGAAAATATGTACACCATG  
ATGAAACCTGTACCTGGAGGAAATATGCCTGGAGATTTTCCAATGAGTGGTGGACCAG  
AAGGTGGTCCAATGGGTCCTATGGGTCCAAATACAATGGGTCCTGTTCTAAATGGTGAC  
GGCCTTGATGGAATGAAAAATAGTCCAGCTAATGGTGGCCCTGGAACACCACGAGAAG  
ATAGTGGAAGTGGAATGGGTGACTATAATCTGGGTGGTTTTTGGAGGTCCTGGAGAAAA

T

>novel\_circ\_001601

GCTATTCGAGAGGGGAAGTGTTTCAGCCGGCGAGAAACAAGAAGTAACGGGGAGCATA  
GAAGTGGCGAGGAGGGAAAATAGGACGAGCAACGTCTTCTCCTCGAGTAGCCTCGAC  
CATCTTTTCTCTTTCCAAGAGCGTAATTGCCAGTTTTTCGAAATAAAAATTTTACTAATATTC  
CCCTCTATCGCTGCCAGCTCGCCGTTAATCGTCCATTTTTTCGCCTCCGCCCTCCATCGT  
TTTTTAAAGGTCCTATAGATCCATCGATTGCTCTTTTCATCTTTTACACATCCCTATATTTA  
TAATCTCAACTTTATTTATAAAACGTACTTTTAAAAATCCTTTAAAAAAATTTCTCTTTCA  
ATTGCTCTTTTATCAGTCTGTCAAATCAATCGATCAATCAATTCATTTACAATACAAATTT  
TTACAATTTTCTAGATAAATCGAAACATTTATACCAGAGAGAGAGAAAAAGAGGGAGAAA  
GAAAGAATGCGTGTAACCTTGTAATATAACCGAACGAGATAATTTCTCTGGTTCAACGA  
CAACACAGAAATTCTCCAATTTATATTCCGACATGGCCCTGTGCTTGCTCGACACATCA  
CTGACCGAGGGGGTTGACTGGTCTGGTGGGGATAGAGCAGCTGGGGTGGCTGGAGCT  
CGAATGCGAGCCCGCGGTACCTACACGCCGGGTTCTGGGTTTGGCCGGGTTCGCGCGGC  
GGGTCTGCGCAACCAAAGAGACACACTCGGACAAAGAGAGAAAAAGCACAGAGAGA  
GAGAGAAGGAGGGAGGGAGGGAGGGAGAGAGAGGGAGAGCAAGCGTGACAGAAAA  
AGAGCGTGGAAGCAGAACGGCGAAGGCGAGGCGAGGCGAGGCGAGTAAAGCGA  
GCTAGTTTGGCGAGCAAGCATCTAGACAGTCGAGCAAATCTTCAAGCAGGCAAACGA  
GACTGGCAGACAG

>novel\_circ\_001602

ATAAATCGAAACATTTATACCAGAGAGAGAGAAAAAGAGGGAGAAAGAAAGAATGCGTG  
TAACTTGTAATATAACCGAACGAGATAATTTCTCTGGTTCAACGACAACACAGAAATT  
CTCCAATTTATATTCCGACATGGCCCTGTGCTTGCTCGACACATCACTGACCGAGGGGG  
TTGACTGGTCTGGTGGGGATAGAGCAGCTGGGGTGGCTGGAGCTCGAATGCGAGCCC  
GCGGTACCTACACGCCGGGTTCTGGGTTTGGCCGGGTTCGCGCGGCGGGTCTGCGCAA  
CCAAAGAGACACACTCGGACAAAGAGAGAAAAAGCACAGAGAGAGAGAGAAGGAGG  
GAGGGAGGGAGGGAGAGAGAGGGAGAGCAAGCGTGACAGAAAAAGAGCGTGGA  
GCAGAACGGCGAAGGCGAGGCGAGGCGAGGCGAGTAAAGCGAGCTAGTTTGGCGA  
GCAAGCATCTAGACAGTCGAGCAAATCTTCAAGCAGGCAAACGAGACTGGCAGACAG  
GTAGGCAAGCAGGCAGGCAAGAGCGAGAGCACAACCTACCGGGCTTCAGAGCCACCC  
CTAGTCGCCTGCCCCGCCACCCAAATCGCTCCCCCACCTTGGATCCACCGCTTGGTACA  
CCCCTCCTCGACGTTGCTTCTTCGCACTACTCCTACTCTTTCTCCGGTGCTTTACGCCG  
CTCGTTTCGTTTCGTACGGTCGTTTCGTGCGCCGCTTCGCTCTCCTCTCCTCGGTGCCCTCG  
TCATTCAATCGTGCTCAGAGAGTGTATATCAGTATATCTTTGGGCCTTTAGTTTCGGTCT  
TGTTTTTTTTTTTTTTTCCATCGACAAATCGTGTGTGTCGGTTTGGTTCCCGTTGCCGCT  
TCTTGTGCAAAAGGATATCTCGTGCGTTTTTTTGGAAGCAAAGCGTGGCAGCTTGCAAT  
CCTCTGCCAGCAACGCACTGACCTGCCTTTCGTCCCGGCATCACGACACATTCTTTCTT  
CTCGTCTCTCCTCGAGCTCTCCTCGTCTCTCCTCGTCTCTCCTCGAGCTCTCCTCGTTT  
CTCGCGCGAGCGAAGGCCGATTCGGTGGGGAAGTAGAGAGGGGGCTCGTATATACAA  
CGCGAGAAACCCGATACCCTCCTTGGTGGACGTTTACCGAATTGATTGACGGTATTGG  
TCAACTTTAGAAGGAAGGAAAAAATCTGAAGGGGAGTCGTTTTATTATATTGTGTTTT  
CGGAAGGAGGATGCACAGATGGAATTTTTTGGTGAAGGAAAGTGAGGAAGAATATCTG

CGTGACGACAAGTGATGGCGAGATGAGGAGGCGCGACGTCGCAATAGAAGGGAAGAC  
GCGGCTGTGAAGCCCGGATAAGCGTGCACGTTGTGTGTCGAGGGACGTTACACGCG  
CGACTCCATCGGTTGCCAAGCCGATTCTCCTCGCACCAGGCGACGAGAACTTCGTACC  
TAAGCCGGTCGTTCAACGTGGCTGATCCTTGGACAT

>novel\_circ\_001605

GTAAAAGATAAAGGAAAAGATATGAAAACGGTATATAAAGGATTAAAATGGAAAGGAC  
GATCAAATAGAAGCGATACAAGTTTGAGATTCCATCAACCAAGATCAGCACCTAGTTCA  
CCTACATCGGATCGAAGGCCTATCGATTTTTTCATCACCTCCAAAATCTCCAAATGGTTTT  
ACTGCTACTACTAGTTATAGAAAAGATCTTCGAATACGTAATAGTAATTCACCGATTCA  
AGCAGAAAACAATATTCACCATTAAGTCCTAGTTCACCAGAAGAATCTGATTTTCCACC  
AGAAAGAGTAAATATTGATTTGATGCAAGAACTCCGTCATGTAATATTTCCGAACACAC  
CTCCTGTTGATAGAACA

>novel\_circ\_001606

GTGTTCCGTGGCATCGAAGTTCATCGTAGGACAAATATTGCGATGTATATGTGCATATAT  
AACTTGATACCGAAGGATGTGTACGAGTTTAAGCAGAAGATACAAAGGGGACCAGAA  
CGGCGAGGAGACGAGAAATCGTGGATGGGCGAGTGGTCGAGAGGGCAGAGGGGTGA  
CGATGAGAGTGAGGGGAAAAAGGACTCGGAACTCGTGTCGTAGCGGTACGACGTTTCG  
GTCGGGTATCTCCGCATCGCGAGCCACACGCTCGGCCGGTGTGCGCTCGCATACGCGC  
TCAGTCGTGCACTGGCCTCGCTTGCGAACTAACGTCGGGCGAGAGCTATTCGATACGT  
ACAACACGAAATACGTTACAGTGTTTTCTTCTTCTTTCATGCATACGTATGTGCGTAAG  
TGTGTGTACACAACCGGCAAAAGATATACATGTACATTTATATACGTGTATCGTATATAAC  
ACACGCAACTTTCTTCTCTATTTTCGTCCGTCAATCGTCTCACGTAGAAAGGGTTAATGT  
GTCGTGTACGAGTATACCGAGTGCAATCATCAGTAGTGATCTATCGAAACGTTATGTTAT  
GACTGACTATCTATATATACATATATACATATATACTAATAGTGTAGTGACAGCAA  
TGACGAAGGGACGCCAAGTCTAACGTGCTCCGATTAACCTCGTTCCGTTAGTCAGCCG  
AGTGTGTGGTAAAGTTGAGAGTGCCTGCGAGAGTAGGAAGGAAGAACAAGAAGCG  
AGTCCTTTGCCAGTCGGTGGAAGTGAGTGAGGTTTGCGAAGACTGTCTCCTCTTGAAG  
TCTCTCTTCTCTGTCTCTTCACTCCTTTCTTTGTGGATCTCAGTGTTCCCTTCAGCTCTTT  
CTCTCGCTTTCTTCATCTCTACCATCGACATCGTGTGAACAGCAACGACAAGTTGGTTT  
CGTCTCGAG

>novel\_circ\_001607

CATAGGTGTTCCGTGGCATCGAAGTTCATCGTAGGACAAATATTGCGATGTATATGTGCA  
TATATAACTTGATACCGAAGGATGTGTACGAGTTTAAGCAGAAGATACAAAGGGGACC  
AGAACGGCGAGGAGACGAGAAATCGTGGATGGGCGAGTGGTCGAGAGGGCAGAGGG  
GTGACGATGAGAGTGAGGGGAAAAAGGACTCGGAACTCGTGTCGTAGCGGTACGACG  
TTCGGTCGGGTATCTCCGCATCGCGAGCCACACGCTCGGCCGGTGTGCGCTCGCATAAC  
GCGCTCAGTCGTGCACTGGCCTCGCTTGCGAACTAACGTCGGGCGAGAGCTATTCGAT  
ACGTACAACACGAAATACGTTACAGTGTTTTCTTCTTCTTTCATGCATACGTATGTGCG  
TAAGTGTGTGTACACAACCGGCAAAAGATATACATGTACATTTATATACGTGTATCGTAT  
ATAACACACGCAACTTTCTTCTCTATTTTCGTCCGTCAATCGTCTCACGTAGAAAGGGTT  
AATGTGTCGTGTACGAGTATACCGAGTGCAATCATCAGTAGTGATCTATCGAAACGTTAT

GTTATGACTGACTATCTATATATACATATATACATATACATATATACTAATAGTGTAGTGAC  
AGCAATGACGAAGGGACGCCAAGTCTAACGTGCTCCGATTAACTTCGTTCCGTTAGTC  
AGCCGAGTGTGTGGTAAAGTTGAGAGTGCCTGCGAGAGTAGGAAGGAAGAACAAAG  
AAGCGAGTCCTTTGCCAGTCGGTGGAAAGTGAGTGAGGTTTGCGAAGACTGTCTCCTCT  
TGAAGTCTCTCTTCTCTGTCTCTTCACTCCTTTCTTTGTGGATCTCAGTGTTCCCTTCAG  
CTCTTTCTCTCGCTTTCTTCATCTCTACCATCGACATCGTGTGAACAGCAACGACAAGT  
TGGTTTCGTCTCGAG

>novel\_circ\_001608

TGACAAAGAAGATACTTCACACAATATGCCACCAGATAGACCAGATGCATCTGATGTGG  
AAACTGGTATAGGACTAAGTACACAAGTTTTCAACTTTGGAGATACAGTATATACAATG  
AAAGAAAAAGAAAATGCAAGTGTTTTTGTGAAACAAATTCAACTGATGAACTTTCTA  
TGTCTGAAAAATCTATTGAAAAGAATAGCCAGTCAGATGATGATCTGACTTCTTTAAGT  
TGGCTTCATCAACAGAATCTATTAAAGGGTTTAGATATTTCAAATCCTACTAAAGAAATG  
AAAAATGAAAATGTTTTAAATAATAATGTTTGTGATGATATGGCAGACTATTCTGAAAAT  
ACTAATTCTATATCAAGTTTAGATGATGGTTATTGTCCAGGAGATAACAATAGCAAGATA  
AATAATACAACATCACATGGTAATAATCAAACTATCAAGTCTCAAGTAAAAATGGTCA  
AAAATCAATGCAAATATTTTCAGGAATCAGTAAAAAATCATTATAGTATTTACAAAATAA  
TCAGACGAAGATTTCTTTAAACAACAATAATTTGCCAGTCTCAAATCGCAACAAACAC  
CCAATCATATACCATATGATCCTCATTTACATAGAAACAGTAAACCTCCATATTCATTTT  
CTTGTTTAATTTTCATGGCTATTGAAGATAGCCCTGTAAAAGCTCTACCAGTCAAGGAA  
GTGTATGCTTGGATTTTGGATCACTTTCCATATTTTAGGAATGCTCCAACCTGGGTGGAAA  
AATCTGTTAGACATAATCTAAGCCTAAATAAGTGCTTTTCGTAAAGTAGAGAAAGCACC  
AAATTTGGGCAAAGGTTCACTGTGGATGGTAGATGCCCAATATCGTCCAAACCTGATAC  
AAGCGTTATCTCGTGCTCCTTTTCCTCCTCCAACCTGTTCAAACCTTTGTCTTCACCCGAA  
AAACCACAAAAAAGAATATCAGTACACGTCTACCTGATCCTACACTTTTTCCATATCT  
TTCCAAAAGACTGGCATCGAGCAACATTATTGACAACACAGATACTGAAGTAGATAGC  
GATGTAGATGCAGCTGCAGCTGCTATGCTTTCTTTTAAACATGGACCTATTATTTAAAT  
CATAATAAAGATCGTAAGCGAAAAGTACCAGAATCAGAAATGTTGGTTCCTGTAATTAC  
TAGGAGTTCTAGTGAAGATCACACTTACAGTTGTATTACCTCAGTAAGACAAGAAAG

>novel\_circ\_001609

TGACAAAGAAGATACTTCACACAATATGCCACCAGATAGACCAGATGCATCTGATGTGG  
AAACTGGTATAGGACTAAGTACACAAGTTTTCAACTTTGGAGATACAGTATATACAATG  
AAAGAAAAAGAAAATGCAAGTGTTTTTGTGAAACAAATTCAACTGATGAACTTTCTA  
TGTCTGAAAAATCTATTGAAAAGAATAGCCAGTCAGATGATGATCTGACTTCTTTAAGT  
TGGCTTCATCAACAGAATCTATTAAAGGGTTTAGATATTTCAAATCCTACTAAAGAAATG  
AAAAATGAAAATGTTTTAAATAATAATGTTTGTGATGATATGGCAGACTATTCTGAAAAT  
ACTAATTCTATATCAAGTTTAGATGATGGTTATTGTCCAGGAGATAACAATAGCAAGATA  
AATAATACAACATCACATGGTAATAATCAAACTATCAAGTCTCAAGTAAAAATGGTCA  
AAAATCAATGCAAATATTTTCAGGAATCAGTAAAAAATCATTATAGTATTTACAAAATAA  
TCAGACGAAGATTTCTTTAAACAACAATAATTTGCCAGTCTCAAATCGCAACAAACAC  
CCAATCATATACCATATGATCCTCATTTACATAGAAACAGTAAACCTCCATATTCATTTT  
CTTGTTTAATTTTCATGGCTATTGAAGATAGCCCTGTAAAAGCTCTACCAGTCAAGGAA



GTGTATGCTTGGATTTTGGATCACTTTCCATATTTTAGGAATGCTCCAACCTGGGTGGAAA  
AATTCTGTTAGACATAATCTAAGCCTAAATAAGTGCTTTTCGTAAAGTAGAGAAAGCACC  
AAATTTGGGCAAAGGTTCACTGTGGATGGTAGATGCCCAATATCGTCCAAACCTGATAC  
AAGCGTTATCTCGTGCTCCTTTTCCTCCTCCAACCTGTTCAAACCTTTGTCTTCACCCGAA  
AAACCACAAAAAAGAATATCAGTACACGTCTACCTGATCCTACACTTTTTCCATATCT  
TTCCAAAAGACTGGCATCGAGCAACATTATTGACAACACAGATACTGAAGTAGATAGC  
GATGTAGATGCAGCTGCAGCTGCTATGCTTTTCTTTTAAACATGGACCTATTATTTTAAAT  
CATAATAAAGATCGTAAGCGAAAAGTACCAGAATCAGAAATGTTGGTTCCTGTAAATTAC  
TAGGAGTTCTAGTGAAGATCACACTTACAGTTGTATTACCTCAGTAAGACAAGAAAGTA  
AATATCCAAGGAAAGAAACAAATACCGATTTTGATGAACAACGGAAAATAGCAGAAGG  
TGCAGATGCACTTTTAAATTTAGCAGGTGTTACTACACCACTTAACCACAGTAGGGCAC  
ATCATATACAAAGTATTAATTCGACATCAAAATCCGAGAGTTCATCAAAACTAAAAAAA  
CGTTCAGCTTCGAACGATTATTCGAATATGTCTGAGAAAAGACGTAAGCATTGGCCAAA  
ATGGAGTGAAGGAAAACG

>novel\_circ\_001610

TCGTGTCACTTGTGTGACTACACGCAACTGACTAACTGACTACACACAGTCCAATTAAT  
AAGTGCAAGATGGCAAGCGAGGTAAATGAAATTGCTGCAGAAGCGAGTGAAAATAAT  
GAAGCGATTACGGGAAGAATATCTTCGACATCTGAGGGAATGGCTCTTGCTTATGGAAG  
CTTGATAATTATGGCTATTTTACCTATCTTCTTTGGTAGTTACCAAGCTGTAAACACCAT  
AAGGAGCAGCAGCAACAATGTAAAAAAGTGGAGAACAGCCAGATACAATGTCTCGC  
AAAGAAGCAGCAATATTTCTTTTATTTCCAGTATTACATTAGTTGGACTGTATGTATTAT  
ATAAG

>novel\_circ\_001611

CATCATCGAGGGCTGAGCTATCGAAAAATATGGCGTCAGGAATACCGAGCGTTCATCAG  
AGGAAGCTTGGACCAGCGCCGATAGCATCCTTCGAAGACCTGTCCGACGAGGTGGAA  
AACGGGGAACCGGCTGCGCGAATGCCAGGCATCGTCGAGGTCACCACGCCGGCAACG  
CCTGGTAGTTTCGCTTAAGACACCCAGCACGCCGAGAATTGACATCAGCAGGGCGAGC  
AGTTCCTCCCACCATGAGGACAGTAACTCCAGGGATTCCACGCCCCGAGAGGGAACCTCC  
TCGCAG

>novel\_circ\_001612

AATGCAGTAAACATGCCGTCATTGTTGGAGGCGCTGGAGCTTAAGTACGGCAGTTCAA  
CGACCGACTGCTCCCTCACGGACGAGGAGACCGAGTCGAGCTCGCCGAAGGCCGCCC  
TCTCGGTCAGCATCTTCATCCCGAAGAAGTCGCCCCGGCACACCGTGCCGGCGTTGCT  
CGTGCTGCAGGACTGCGACATCGAGTCGGCCGGGAACGACGCGGAGAACTGAGCA  
AGAAATGCAGGAACGTGGAGGAGCTCGATCTCGCGCAAAACAACTGTCCCAATGGA  
CCGAGGTGTTTCGGTATTCTGCAGCACATGCCCAAGATCAAATTCGTGAATCTCAGCTTC  
AATTGTCTGGCCGAGGTTCTCGAGATCAAGCACGGTAGCTACGACATGTTGAAGAATC  
TCGTGTTGAACGGAACCAGGGTCACCTGGTCAACGGTCCAGGGATTGATACGTCTGCT  
TCGTAATCTCGAGGAGCTTCATCTTTTCGTTGAACGAGTACAAGACGGTCGACCTGGAC  
TATCAATTGCCCCGAGAACAAGAACGTGTCCGTGAAAAAGCTCCATTTACCGGGAACC  
CCGTCGAGGTGTGGAACGAAATTTCCAAGCTTGGCTACGTATCCCCAATCTCGAGAG

CCTAGTGCTAGCCGAGTGCCCGATAAGGTCGTTGGCTCTCGTCGACAATAGAAACTCG  
AACGAGGAGCCCTGCACGAAGAAGGGGGCGGGGAAGCTGAGCGAGGACAACGAGAA  
TATGAACAGTCTGAGGGGGGAGGATGAGGAGGAGGAGGAGGAGGAGGACGAGGAGG  
AGGGGACATCGGTGGTGGACGAGAAGGGGAACAGGATATTCAGCGAGGGAAAATTGA  
ATTACGATAGATCGGAGTCGGAATCGGAATCTAGTGGCACTACCATCAGGTCTCTCAC  
GATCCTTTTCAGAAAGCTAAGGTTTCTGAACGTGAACGGCACCCCTGTTGTCCACGTGGG  
ACGATGTCGAGCGACTTGCCAGGTTTCCAGCGCTTAAATCGTTGAGGATTCAGGGCTG  
CCCCCTTTTCGAGAGTCTCGAGAATACACCGAGCACGAGAGGGCGGCAACTGTTAATC  
GCCAGACTTCCGAATGTCGAGACATTGAACGGCGGCGGTGTGATATCCTCCCAGGAGC  
GCGAGGATGCCGAAAGGGCCTTCATTCGATATTACATGGACAAACCGGAAGCGGACAG  
GCCGAAAGGTACTCCGAGCTGGTGGCTATTCACGGAAGCTGGATCCTCTGGTACAC  
GTCGACCTGACACCTGAGAAGAGGGTCAAGGTCACATTCATTACGGAGACCTAGTC  
GAG

>novel\_circ\_001613

AGCCGCAATTTCGCGCTGGGACTGCAAAACGGATCCTGGAGAAGATCGTTCCTGGTGG  
GCGTTCTAGTGCTGGTTTTGCTGATCTCGGCCGGCGCGTTCTACGCTCGCTGCTGGCTG  
CCACTGGTTCTGCTCTGCCGCGACAAATTCGCCCTCTCGAGGAGAACGATGGAAAGG  
AAAGCGACGCCCTGGTCTGCTACCACGAGAAAGACTCGAACCTGGCCATCGGCATAGT  
TATACCAACGCTGGAGTCGAGGCATCGGTACAAGTGCACGTCGCTCGAGCTCTCCCAA  
CTGAATCAGAATT

>novel\_circ\_001614

GGGAGAAATCGAGCGGATACACGGGGAAGCCGCTGCCAACGTACAGGCCAGCCTCGC  
AGTTGGTTCCGCTGGGAGGAGCTGCGAGATTGTTTTGCGAGGCGTATCTCGGCAAGGT  
GGAGCTGCCGACGCGAAAAATTCGGTGACATGGTCGAAGAGCGACAGCAACGTGAC  
GTTGCCGAGTCACGGAAGGATCGCCCAGCACAAAGTGTCCAGGGAAAACAATCAGAT  
CATTGGCTCTTACTTGAGATCGAGGACATCACTCTGGAAGATTACGGGGAGTACAAAT  
GCGAAGTTAGCAACGGAGTAGACGAGGAGATCACGTTACCAGCTCACGTTTATCGACA  
AGAGCCGCAATTCGCGCTGGGACTGCAAAACGGATCCTGGAGAAGATCGTTCCTGGT  
GGGCGTTCTAGTGCTGGTTTTGCTGATCTCGGCCGGCGCGTTCTACGCTCGCTGCTGGC  
TGCCACTGGTTCTGCTCTGCCGCGACAAATTCGCCCTCTCGAGGAGAACGATGGAAA  
GGAAAGCGACGCCCTGGTCTGCTACCACGAGAAAGACTCGAACCTGGCCATCGGCAT  
AGTTATACCAACGCTGGAGTCGAGGCATCGGTACAAGTGCACGTCGCTCGAGCTCTCC  
CAACTGAATCAGAATT

>novel\_circ\_001615

GGAAAACAATCAGATCATTGGCTCTTACTTGAGATCGAGGACATCACTCTGGAAGATT  
ACGGGGAGTACAAATGCGAAGTTAGCAACGGAGTAGACGAGGAGATCACGTTACCAG  
CTCACGTTTATCGACAAGAGCCGCAATTCGCGCTGGGACTGCAAAACGGATCCTGGAG  
AAGATCGTTCCTGGTGGGCGTTCTAGTGCTGGTTTTGCTGATCTCGGCCGGCGCGTTCT  
ACGCTCGCTGCTGGCTGCCACTGGTTCTGCTCTGCCGCGACAAATTCGCCCTCTCGA  
GGAGAACG

>novel\_circ\_001616

ATATGCGAAATACAGCAATGCCTGATGAACGAGCTGTGATGACCTACGTTTCTTCCTAC  
TACCACTGTTTTAGCGGTGCGCAAAAGGCAGAGACAGCGGCGAATAGAATATGCAAAG  
TTCTGAAAGTGAATCAAGAGAACGAAAGGCTGATGGAAGAGTATGAACGTCTGGCAT  
CTGATTTGTTGGAGTGGATAAGGCGAACAATGCCTTGGTTGGCTAGTCGACAAACAGA  
TAACTCCCTTGCTGGCTGTCAAAAGAAATTAGAAGAATATAGAACGTATCGTCGTAAGC  
ACAAACCACCCCGGTCGAGCAGAAAGCTAAGCTGGAAACAAATTTCAATACTTTGC  
AAACGAAATTGAGATTGAGCAATCGACCTGCTTACATGCCAACAGAAGGAAAAATGGT  
ATCCGATATAAACAAGGCTTGGAAAGGTTTGGAGTTGGCAGAGAAATCATTTGAAGAG  
TGGCTGTTGTTCGGAAATGATGCGTCTAGAACGCTTGGAAACATTTGGCTCAGAAATTTAA  
GCACAAAGCTGATGCGCATGAAGAATGGACAGCAGGAAAGGAGGAGATGCTTACCTC  
GCAACACTTCCGCCAATGTAAGCTTAACGAGCTCAAAGCTTTGAAGAAAAAGCACGA  
AGCTTTCGAATCGGATCTTGCTGCTCATCAGGATCGGGTAGAACAGATAGCCGCTATCG  
CTCAAGAGCTCAA

>novel\_circ\_001617

GTGAATTCCTCGAAGAATACGGTAACATCTCGTACACCAGGAAATTTGTCGTCGACCA  
GATTGAGAAAACCCACTGCATTCACTTTGACGCCATTGCAAAGCAAACTACACAGCA  
AAACACATTCGCGAATCATCGAAAGACTCATCTGACCGATGGAAAATTACAAACCGTT  
GTTAACGAAACATTGGATACCGTGGATGAAAGAACGGAAACTTCGAAACCTGAGAAA  
GATATCGATCAAAATAGTAGAGCGCAAGAAATCGCGGTCACATTGGCGGATCCACCGT  
CCGTGCAATCATCAACCACCG

>novel\_circ\_001619

GTTTGCTTTCCTAAGGGAAGAGGAGGGGCGAAGAAGGATGTGCAACGACGAGGAGA  
AACCGTTTCGCGGTGGAGAGGGCGAAAAGTGGGCGGGCCAAATGCAAGAAGTGCAAG  
TGTCCAATAGAGAAGGACACGGTGAGGATCGCCAAATTGGTCGCGAATCCGTTACGG  
ATGGCAAGATGAAAGCGTGGCATCACCTGACCTGCCTATTCGAGGTATTTCGTAACA  
GAGAGCCAGTACCAAGCGAATAGACGATCCCGCGGAGGACGTGAGCGGGTGGGAAGA  
TCTGAGCAAGGAGGACAGAGCGATCGTGCTTTCGTATGATCGAAGAGTTCGAAAAGGAT  
TCGAAAAATCACACTCCTAAGGGGAAAGCAGTGGAAGCGAGAAAGCGCAAAAAGTGA  
CATTGGCACGAAATCCGATCCTTCTCCGAGCAAAAAAACTAAGGAGAAAGAGAAGGA  
GAATGAGAAGAAGAAGAAGAAGAACGATTTCGATATCCTCGAGCGAGAAGGAAGAAA  
CGGATAGCTCCTCGGCGACCAGGAGCCCAGAGAAAAGAGCGACGAGAGACGATTTCGT  
TCAAGGAATTTCAACGGGTTTGAACGATGTGGCAAAAGTGGACGCGTATACCGAAAA  
AACGGCCGTATGAAAAGCTTGTTTCAGCAAAGGATCCGAAGCTG

>novel\_circ\_001620

CGATAAAAACAGGACCGAGGGAATGACGGGAAGGTCAAGCGCGAAACGTAGGACAG  
CCCCGTGTCTGTTGGCACTGTTGTTGTTGTTGTTCTTCCATCTCTACCGTCGTCCGTCG  
GCGGGGAACCGATACCGTCCGAGTTCTACGGCAAAACCTCGGACAACGATTTTCATATT  
GCTCAACAAGCTGAAGGAGTTGTTTCGAGGAGAAACAGTACGTGGCAGAACGGGAGA  
AAGAGTTGGACAAGGAACGTATGAAGATCCAGTCGATAATAATGGAGGGGAAGGAATC  
GGAGATACAATCGGACTCGGATTACTACGCTGAGAAATTACCGACACCGAATGCCGTG

GTCAGACAAGAGCCGCAGCATTCCGGCAAACGTACCATGATCAGCT

>novel\_circ\_001622

GAAGATCGACAAGTGGAGCGCGCGATGGCGGACGATCAAGAAGCAAACAACACGTG  
CGAGGATTCCCTCGGGCCCGGTGATGCAAACACCGCATTTCGCTAAGAAAATCCGAGGA  
CGAAAAGGAGCCCTGAAGAAAAAGAATGTCTACGTGGTCAAGAATCACAGTTTCATG  
CCTCGTTTTCTTCAAACAACCAACGTTCTGCAGTCATTGCAAGGACTTTATATGTTTCAG  
GGGCTTCGGGAAGCAAGGATACCAATGTCAAGTCTGCAGTTTCGTTGTACACAAACGA  
TGCCACGAGTACGTGACCTTCACGTGCCCCGGTGCTGACAAAGGAGCTGATTCCGACG  
ACACGCGGACGAAGCACCAATTCAAGCAACACACCTACAACAGCCCCACCTTCTGTG  
ACCACTGCGGTAGTCTTCTCTATGGTGTCATCCACCAGGGCATGAAGTGCCAAGATGA  
GCACCGCACACAAATGGGAGGTTTTACGTACCTGACGCCGACCTTCTGCGACCACTG  
CGGCTCGATGCTTCACGGTATCGCGCATCAGGGACTTAAATGTTTACG

>novel\_circ\_001623

GTGTTTCGCGGCTAAGTGTGCGGAGTTCGGCACCGTTTCCAACAGTAGCTGCGAGAGCG  
ACGCGACGCGTCACACTTGGCCGGCCGTTTCGCTTTCCTTCGCAACCACCTTCGCAACC  
ACCTCCGTGGGGAAATTCGATCGAGTTTCTCGAGGACGACGATTTAGATAGATCCAAAT  
GTCCAAGAACGGGATCCCCGTGGACCGCAAGTCCGATCTCAAGAAACCTCCGGAGGT  
GTTTCGAGACCCAAGTTCCCGCGCCATCCGGCTCGCTTCTGATCACGGGATCGTTGTTAA  
TCATCGTTATCGGTGTACCACGAAACCGTCAACCGATTCATAGCGACGAGAAACCGATA  
TTATTGTGCGCACAGTGAGTGTTGGGTAGCGCCCGAACAAGTATTTTGAAGAATCATCG  
CGGAAGTATCATCTTTGTGCGCCGTGCTCTTCATTGTGTCGTCATCGTGCAAACTAAGA  
GCCTGGTGTTTGCCGAAAGATTGCGCGCAACAGTGTTGATTTTCCCCAACTACCAATAA  
GAAGAACATAGCGAACCCTCTATATCTCTGTGTTGAAAGCGGCACGCAAGTATACACT  
TATACACACAGTGTCTTCTCTTCGCTTCGCGACAACCTACTCGAGGCAGGGGATCCTCC  
AATCGGAAATTGCAGAACTTGGTATTTCTTCTACATTTTCATTTAGCGTTTCGTATTTCG  
TAGCGATTACGAATAACGAACCTAACGGATATATCGTTTCCGTATCGTGTGCGGTGTGC  
GTAGAGCGCGTGTCAAGCGTGCAATGAACGGCAACGGCAGACCTCATGGAGAGAATA  
GAGGACGAAATGGCCACGTGCTTGTGTGGGAACAACCTGGCCTGGAGGAAGAGGAAT  
CACCTGCGCGAATGCGTAAAAACCTCGAAATTCCGCAACTTTCTGTCCGAGTTTCTGCT  
TATCTCCACTCTCGAGGTCGTATATATCTCTGTCATAGATCGAACTAGTTTACGAACT  
TGATGTATCCTATAAACCACGCGTCGAACCACGTGCTCCCGCCGTCAATTCTTCGCTCTCT  
TCCTCATTTACGCCGAGCATTGGTGGGGTTCGCGTCACATAGTGAATCTGATGCTGTTCT  
TCGGTATGGCGAATGCCTATGTGATGAGAACTAATATGTCGGTGGCGATCGTCGCTATG  
GTCAATCACACTTCCATCACGGAGAGCAAGGAACCTGTGGTGAACGAGTGCGGCCAC  
GATGGGAATGCGAGCAACGATTCTTCCACCTTGGCCAACCATGACGGAGAGTTTCATT  
GGGACAGCACCATGCAGGGTTACTTGCTCAGCTCGTTCTTCTACGGTTACGTCATCACG  
CAAATACCATTCGGAATACTCGCGAAACGTTACGGATCGAAATACTTTCTTGGCATCGG  
TATGCTGATCAATTTCGATGTTTGGACTGCTGGTCCCTGTGTCCGCACGTGCCGGTTACC  
ATTGGCTGATGATCGTTTCGATTTATTCAAGGTTTGGGCGAG

>novel\_circ\_001624

CATTGGTGGGGTTCGCGTCACATAGTGAATCTGATGCTGTTCTTCGGTATGGCGAATGCC

TATGTGATGAGAACTAATATGTCGGTGGCGATCGTCGCTATGGTCAATCACACTTCCATC  
ACGGAGAGCAAGGAACCTGTGGTGAACGAGTGCGGCCACGATGGGAATGCGAGCAA  
CGATTCTTCCACCTTGGCCAACCATGACGGAGAGTTTCATTGGGACAGCACCATGCAG  
GGTACTTGCTCAGCTCGTTCTTCTACGGTTACGTCATCACGCAAATACCATTCGGAATA  
CTCGCGAAACGTTACGGATCGAAATACTTTCTTGGCATCGGTATGCTGATCAATTCGAT  
GTTTGGACTGCTGGTCCCTGTGTCCGCACGTGCCGGTTACCATTGGCTGATGATCGTTC  
GATTTATTCAAGGTTTGGGCGAG

>novel\_circ\_001625

AACCATGACGGAGAGTTTCATTGGGACAGCACCATGCAGGGTACTTGCTCAGCTCGT  
TCTTCTACGGTTACGTCATCACGCAAATACCATTCGGAATACTCGCGAAACGTTACGGA  
TCGAAATACTTTCTTGGCATCGGTATGCTGATCAATTCGATGTTTGGACTGCTGGTCCCT  
GTGTCCGCACGTGCCGGTTACCATTGGCTGATGATCGTTCGATTTATTCAAGGTTTGGG  
CGAGGGTCTATTGTGCCTTGACACACGCGATGCTGGCCAAGTGGATACCGCCTAAC  
GAACGTAGTAGAATGGGAGCCTTCGTATACGCTG

>novel\_circ\_001626

GAAACGCATGCGACCAAAAGAGAAGAAAGTTACAACGTTGCAGCGTTGACGGTAAAT  
GCAGGGTTCGGTGAATGTTGGAGGAAACAGAATGTCCAGCGAGCAAGCGCGAGCAAG  
CGCCATCGCGACGAAAGCGCCGCTCGGCTGATCGATACATTCGAGTTTTAGGGTGGTG  
CGACGGAGCGAGGAAGAGAACGTAGGAAATGGTTTAAAGAAGGGGTGACCTTGTCTCC  
TATTTTCGGAAGGTAGCTTTCTCGTGATTCCCGATAATACTCTCTTTCTCTCTCTTTTT  
CTCTCTTATAGATTTGTATTCTAAGAGATACGGGGATCGTCGAAGCCGCATTATGAACAA  
CGAAAGAACTGAAAGATAATAGGGAAAGAAAAGACGCGGTAATAACGAGAAAAGA  
AACGTGGATATCGATATCGAATTTAAATGAAAAAAGTTTGATCGATTGAAAACGATCGT  
TCATTAGAGAAACCACTGCAACTGATTTTCAGAGGTCTCAACGTTTCACTCTGTTTAT  
TGCTTTTTCTTTTCTTGTATTGCCTCATTTTTTCAAAAGAAAAAAAAAAAAAATTGTATTC  
TGTAATCTGGGAATAAAACGCATCGGCCGAATACGTTATTAGCGATATTATCGCGATTTT  
TAATCGCGGATGTACGTATATAAAATTGAAAACCTCGGCATTTGTTGTTATCGTTTTTCTTT  
TTTCTTGACGAATAAATTACTCGCTGTGTTTAAAATAGTTTGTAAATACCGAACAAATACCG  
ATTCGGTAACGTAAAACCGAAACCTGTTTTTTATCGAACATCAAACGAGAAAATAAAA  
GGAAAATCAAATTTGCGATAAAGATAAAACGCGTCGGGCAAAAAAATTCGCGTTTATT  
CGCCTGCGCGATTTTCCGAGCGAAAAGAGAACGAGAGGTAAAATGGGATGAAAAGAA  
CAGAAGAGACAAAGAAAAGAATGGCAACTGGGCCTAGTACTAGACGGCGCTATGCGA  
CGCGACGAAAACAATCGAGCAACGCAGACGAGTCCAAATTTTAACGGTACGTGGTAG  
TCGGTGGTAAAACGAAGGAACGTGGAAAGGACGAAGAGAGACGATCGATGTAGCAG  
CGGAGAGGGGAGGAGCGCGCAAAGGCAGCAGGAAGACGGGCAGAAGGGCAACGAT  
TGCGAATAGGAGGATGCGGTGAAGAAGCGACGGCTGTTGCTAGAGCGGTAGAGAAAC  
TGGTGGGTGGCGGTGAGGAGACGAACGTAGCGAAGCAGTTTTACAATTACGTAGCCG  
GCTCGCGCTCAGGCGAAAAGTACAAATGTGCTTCGAACGCAACAATACCGGGTCTCTA  
TAAATAACCGAGATTGCGGAGTCTCACGAGGCAGGGCGCTGTCATCGTGCGCGCGCGA  
CACCCCCCAGAGAATGCGAGAGAATCGCGAAAGAAACAGTAGCGCGCATCGCGCGC  
GCAGTTCTCTTTCTGTTATCCGTTACGTTTTCGCGCGCGCGTGCCCATGTTCCAACGAATT  
CGCAATTTATACCTTTATATTTTTCGAGTTGTTTCGGACGACTCTACTGTTATAATTCGTTT

ATCGTTGACGTGCCGATTCCCTTCGAATCGATGGCTGCTTGTCTTCGATAAAACGCAAGA  
CGTTATTTTTCTCGCTTATAATGTTTTCCAACGATTTCGCGATTAAATTCATCGGCTACCA  
TTGGAATCGAATGGTGTGTTGGTGCACAGTAAGTGATATAAGTGCGCAGTGATGCAC  
ATTGGTGACTAAATCACGTTCTAAATCTTATCAGTTGGTGTGAGCATTTAATTAGACCTA  
CAAATATACCGACGTGATGTATGTTCTTCGAGAATGACGAACGAACGAACGAACAAAC  
GAACGGAATTCGCTTTAAACGAGCGAGTGTATTCTAGTAACGCGTCGTTGCGCATTAA  
TCACACGCGTATTTTTCTCTTTCTTTGTTATCGCGATTTCGACATTTGCCTCGCATCTTTC  
TCTTCCTCTTCATTTACCATTTGATTCTTCTTTGTTTCATCGAAATCTTTTATTCTCCGGTT  
TTCTATGTAATATTCGACGATCGAATTCATCTTCATCGATCATTGGCTACGAACGTCGT  
AATATATCGTAAATTATCGAAACGACCAACGTTCTCTAACATTCTTATTTTTATCTCATCA  
TAATTCAATGTATACTCGAGTCTCAAATTCGAATTATTTTTTACCATTTTTATATACCTTTT  
TTAATCCATATTCGACAATTTTTCTCAATCGATAATCCACGTTTTTCTATTTCGAATCGTCT  
CGATTCGTGTGCGTATTCAAAAGCCAATTTTGGATCAACCGGACACCTGTTGTACTTG  
GCGTCGTTTGTGTAACCTTCGAGAGTATATATCGACGCGTTAATATTTCTTCTCGTTCTCT  
TATTCATTTTTTTTAAATTACGATGCGCATCCAAGTTTTTACATGGACTCTCAACAGTTTC  
TCAATTTTCATAAATAATAACGCTATCGTTTCTTTCATGCAAGCTTTGCATTCTTCTCGATG  
CTTGTTTTCTGTCAACCGGTAAATGGCATAAACGACGAGAAAAGAAGAGAAAACAA  
AGATATTGACGCGTACGCAATATAATCACGTCTGTACGGAGAAAGACCAGTCGGACTA  
GTTTTCGCAAATGGTTTTAAATACCATTACGAAAGAGGGGAAGCAATAAGAGGGACG  
AACTTTGTCATATGGATGGGCAAGGAAAAATTCACATTCGAGATGCCAACACCGGGTC  
ACGCGTTTCGCACGCACGCACGTGCGCGCGCCACGATTCATCGTTTTACCACGGTAGAC  
TGACATTTGCCGGGATATCGCGGATGACGACACACGTCAGCGCATGCGCACATTGCCC  
GTACAAATTCGACTGTTGAATTCGCGATTCTTCTCGATACGAGAAAAAGTTTCGATACAA  
ATTTTTCTCGTCGCGATATACGATATTCTCGAAACGGATTTCGCGAATACATCGCAACAAA  
GAGGCAGAAAGTGAACAAGCTTGACGTCACTGGAATCATTTCGCGCCACTTAGACCAA  
GTCACGAGTTCAATTTAAATGCGAACGGTCAAGTACCGTGGTTTCGATCGGCCGTTTC  
GTTCCGTAACCTGTAAAATGTTGGAATCGTTTCATGTTGGGAGAATAATCTGTTTCGTACA  
TGTACGAAAAAAATATTCATTGGAATCATCGTGGACTTTGAAAAGTCAATGGTATGA  
ATATAGCGTGGAAGGGGGGAAAACAGAGAGAGAAAGAGTCTAGTCTAGACCCAAATG  
CGACCGAGTCGATTCGAGTTATACCGATATCACCACCATTATGAGGTCATTGGTCTTCCT  
TCCTCTTGCTTACTCTGAACTCGTGGAATAACATACGTACGTAGCCGTGTATACGTATAC  
ACGCCTACACGTCAGACCAGCGCGATCTCGTTACTTCACCTCGGTTGTTTTTCGAATTA  
AATCATTCTTCGTACGATTTTTTCGTTTCGTTTTGTCGTTTCGTTTCGCACAATTTTTTTTT  
CCTATCACACGTAGAGCGTCGCAAATCGACGCGACAAAATATATGAAACTCGATCTAAT  
TGCCGAATCTCCGATACGTTTTCCGCGAAGAAAAACGATGATTGAAAAAGAACGAAG  
GGACAAACGGAGAAAGTAACGTGTGCGCGTATAGGTGTGACGGGGTAGAGAGGAAGA  
GGACTAGAAGGAGACGCGTGTACAGTCGCGTTTAGTAGGTGCGTATATAAATGTCATCC  
TATATATAGCGAACGTTTCGTCTAATCTTAGCTACTCGGCCACCGGCCAGGAACACGAGT  
AAAACTTACTTTGCCTCTGTTTGCTCGTCCTCCTGTCTCGCTCGCACCAACTATCCTTC  
GGTGAACCGACGCGACGCAATCGAGTTTCCGCTCTCGACTTTTCTCCCACGCGTTCTC  
TCTCGGATCCTTAGATTCTCTCTCGCGATACGCTATCTCGCGGATTCGGGATTGGATGAC  
GGTCGATCGTTGTCGCGCGTTGTCGTCATTTTTCCATCGAAAAGTGTGTATATATATAT  
ATATATAAATATACAGTTAGTGGAGATACGACGAATTCGTATTTCAAGACACGAAGAC  
CACCGGTAGAAATACGAACCACTGGTTTTCGCTGAACCGACCGTGGTCACCTTTTTCTCTT

TCTACATCAACTACTCGGCTGACCTACACACCGACATTCGGTCGCTAATAATAACGGTA  
CGCTGTGGCGAGGCGTCGATATCACGATTCTCTTTAATCCGATTGATTGACTCGGCT  
CGATTCCATTTCATATCTCGTTTTGCCTCGATATGAAAACGACCTATTCGCGTATCGATC  
GATCGATCAATCGATGCGAATCGTAATCGTGTTCGGCTAATCGCTCGAATTGAAATCG  
AAAACGTTTTTTTTTTTTCTCTCACGATTCGACTCGATTAGAATCGAATTCGAGAGA  
GCTAGCCTCTCGCAAAGAGAATGGAATTTTCGAACGCGTTCAAAAAAGCGTGCGC  
GATAGAGAACGAGTTTCGCCGTAAATAATTATTACCGATTAATAAATATCGATAAATATC  
GATAAATCGAGGCACGTATTTCCGGTTGGAACGAGCGAACGATTGTAATTGCGATCCCT  
ACCTTTTCGGTTGGGGTAACAGGAGCACGGAGGAAAGAGAGGTGAACAAGAGCGGCA  
AAGCAAACCCGTCGAGGAACGGCCCTCCTCCACGATTAACCTTGGAATTGACTCGAAG  
GAATTCTCGCAGCGTACAGTGACCTCTGCTCGCCCGCTAACTCTCGACGCTCGTCGAG  
CCTCGATCCGTTTCGCGCTCGCGCTCATCTTCGGCCCGTTCCTCTCTCTCTCTCGTTCGCC  
CCATCCGTTCCCAACCGATTCCAACCGATTCCAACCGATTCCAACCGATCGATCCCATT  
CAAATCGAGAGAATCGAGTGCTGGCCGCGCACCGCTCTGCGCCTGCGCTGTAACGACC  
CTTCCTTCCCTCCTCGGTCGGTACGAATCGAGCGAGCGAGCAAGCTTCCCGATAAAA  
AAACTTTGGTGTTCATCTCTTTTCATATACCAAACCTCTTCTCTCTCTCTCTCTCTCT  
TTCTTTCTCTCTCTGTTTCAGAAGACGTGGGTTACAGAAGTGTCGAGATCGCGTCCGCG  
TTTACGCATCTACCGCAGAAAGAACGCGAGAAAAAGAGAAGATAAGAGATGGCCAGG  
GACACACCAGGCTCCCCGATGTCCAGACCGAGAGACTTGGTCGGCGGAGTTGGCGCT  
ACTACGACCACCTTGACATCGAGCGGTTATCACACCGGCTCCGCGGATCCATCCACCCT  
TCACGGCCACGTGTTGCAGCAGAAGATACTCGAGCTACAACAGCATCATCAACTTCAA  
CAACAAATTCTCCGGCAACAATATCAGGCGCAAGAACGACAATTGGCCGAACTGCACG  
AGCAACAGATGCATCAGTTGAAGCTTTGGGAGCAGCAGAAACAACCTGGAGGAGCAAA  
GGAGAGAGAAGGAGAGGCTCGAAGCGTTGAGGAAGAAGGACAAACACGATCACAGC  
GCGATCGCTTCGACGGAGGTGAAGCAACGACTTCAG

>novel\_circ\_001627

GAAACGCATGCGACCAAAAGAGAAGAAAGTTACAACGTTGCAGCGTTGACGGTAAAT  
GCAGGGTTCGGTGAATGTTGGAGGAAACAGAATGTCCAGCGAGCAAGCGCGAGCAAG  
CGCCATCGCGACGAAAGCGCCGCTCGGCTGATCGATACATTCGAGTTTTAGGGTGGTG  
CGACGGAGCGAGGAAGAGAACGTAGGAAATGGTTTAAAGAGGGGTGACCTTGTCTCC  
TATTTTCGGAAGGTAGCTTTCTCGTGATTCCCGATAATACTCTCTTTCTCTCTCTTTTT  
CTCTCTTATAGATTGTATTCTAAGAGATACGGGGATCGTCGAAGCCGCATTATGAACAA  
CGAAAGAACTGAAAGATAATAGGGAAAGAAAAGACGCGGTAATAACGAGAAAAGA  
AACGTGGATATCGATATCGAATTTAAATGAAAAAGTTTGATCGATTGAAAACGATCGT  
TCATTAGAGAAACCACCTGCAACTGATTTTCAGAGGTCTCAACGTTTCACTCTGTTTAT  
TGCTTTTTCTTTCTTGTATTGCCTCATTTTTTCAAAAGAAAAAAAAAAAAAATTGTATTC  
TGTAATCTGGGAATAAAACGCATCGGCCGAATACGTTATTAGCGATATTATCGCGATTTT  
TAATCGCGGATGTACGTATATAAAATTGAAAACCTCGGCATTTGTTGTTATCGTTTTTCTTT  
TTTCTTGACGAATAAATTACTCGCTGTGTTTAAAATAGTTTGTAAATACCGAACAAATACCG  
ATTCGGTAACGTAAAACCGAAACCTGTTTTTATCGAACATCAAACGAGAAAATAAAA  
GGAAAATCAAATTTGCGATAAAGATAAAACGCGTCGGGCAAAAAAATTCGCGTTTATT  
CGCCTGCGCGATTTTCCGAGCGAAAAGAGAACGAGAGGTAAAATGGGATGAAAAGAA  
CAGAAGAGACAAAGAAAAGAATGGCAACTGGGCCTAGTACTAGACGGCGCTATGCGA

CGCGACGAAAACAATCGAGCAACGCAGACGAGTCCAAATTTTAACGGTACGTGGTAG  
TCGGTGGTAAAACGAAGGAACGTGGAAAGGACGAAGAGAGACGATCGATGTAGCAG  
CGGAGAGGGGAGGAGCGCGCAAAGGCAGCAGGAAGACGGGCAGAAGGGCAACGAT  
TGCGAATAGGAGGATGCGGTGAAGAAGCGACGGCTGTTGCTAGAGCGGTAGAGAAAC  
TGGTGGGTGGCGGTGAGGAGACGAACGTAGCGAAGCAGTTTTACAATTACGTAGCCG  
GCTCGCGCTCAGGCGAAAAGTACAAATGTGCTTCGAACGCAACAATACCGGGTCTCTA  
TAAATAACCGAGATTTCGCGAGTCTCACGAGGCAGGGCGCTGTCATCGTGC GCGCGCGA  
CACCCCCCAGAGAATGCGAGAGAATGCGGAAAGAAACAGTAGCGCGCATCGCGCGC  
GCAGTTCTCTTTTCGTTATCCGTTACGTTTTTCGCGCGCGCGTGCCCATGTTCCAACGAATT  
CGCAATTTATACCTTTATATTTTTCGAGTTGTTTCGGACGACTCTACTGTTATAATTGTTTT  
ATCGTTGACGTGCCGATTCTTCGAATCGATGGCTGCTTGTCTTCGATAAAACGCAAGA  
CGTTATTTTTCTCGCTTATAATGTTTTCCAACGATTTCGCGATTAAATTCATCGGCTACCA  
TTGGAATCGAATGGTGTGTTGTTGGTGCACAGTAAGTGATATAAGTGCGCAGTGATGCAC  
ATTGGTGACTAAATCACGTTCTAAATCTTATCAGTTGGTGTGAGCATTTAATTAGACCTA  
CAAATATACCGACGTGATGTATGTTCTTCGAGAATGACGAACGAACGAACGAACAAAC  
GAACGGAATTCGCTTTAAACGAGCGAGTGTATTCTAGTAACGCGTCGTTGCGCATTAA  
TCACACGCGTATTTTTCTCTTTCTTTGTTATCGCGATTTCGACATTTGCCTCGCATCTTTC  
TCTTCCTCTTCATTTACCATTTGATTCTTCTTTGTTTCATCGAAATCTTTTATTCTCCGGTT  
TTCTATGTAATATTCGACGATCGAATTCATCTTCATCGATCATTGGCTACGAACGTCGT  
AATATATCGTAAATTATCGAAACGACCAACGTTCTCTAACATTCTTATTTTTATCTCATCA  
TAATTCAATGTATACTCGAGTCTCAAATTCGAATTATTTTTTACCATTTTTATATACCTTTT  
TTAATCCATATTCGACAATTTTTCTCAATCGATAATCCACGTTTTTCTATTTCGAATCGTCT  
CGATTTTCGTGTCGTGATTCAAAAGCCAATTTTGGATCAACCGGACACCTGTTGTACTTG  
GCGTCGTTTGTGTAACCTTCGAGAGTATATATCGACGCGTTAATATTTCTTCTTCGTTCTCT  
TATTCATTTTTTTTAATTTACGATGCGCATCCAAGTTTTTACATGGACTCTCAACAGTTTC  
TCAATTTTCATAAATAATAACGCTATCGTTTCTTTCATGCAAGCTTTGCATTCTTCTCGATG  
CTTGTTTTCTGTCAACCGGTAAATGGCATAAACGACGAGAAAAGAAGAGAAAACAA  
AGATATTGACGCGTACGCAATATAATCACGTCTGTACGGAGAAAGACCAGTCGGACTA  
GTTTTCGCAAATGGTTTTAAATACCATTACGAAAGAGGGGAAGCAATAAGAGGGACG  
AACTTTGTCATATGGATGGGCAAGGAAAAATTCACATTCGAGATGCCAACACCGGGTC  
ACGCGTTTCGCACGCACGCACGTGCGCGCGCCACGATTCATCGTTTTACCACGGTAGAC  
TGACATTTGCCGGGATATCGCGGATGACGACACACGTCAGCGCATGCGCACATTGCCC  
GTACAAATTCGACTGTTGAATTCGCGATTCTTCTCGATACGAGAAAAAGTTTCGATACAA  
ATTTTTCTCGTCGCGATATACGATATTCTCGAAACGGATTTCGCGAATACATCGCAACAAA  
GAGGCAGAAAGTGAACAAGCTTGACGTCACTGGAATCATTCGCGCCACTTAGACCAA  
GTCACGAGTTCAATTTAAATGCGAACGGTCAAGTACCGTGGTTCGATCGGCCGTTTC  
GTTCCGTAACTGTAAAATGTTGGAATCGTTTCATGTTGGGAGAATAATCTGTTCTGTACA  
TGACGAAAAAAAATATTCATTTGGAATCATCGTGGACTTTGAAAAGTCAATGGTATGA  
ATATAGCGTGGAAGGGGGGAAAACAGAGAGAGAAAGAGTCTAGTCTAGACCCAAATG  
CGACCGAGTCGATTCGAGTTATACCGATATCACCAACATTATGAGGTCAATTGGTCTTCCT  
TCCTCTTGCTTACTCTGAACTCGTGGAATAACATACGTACGTAGCCGTGTATACGTATAC  
ACGCCTACACGTCAGACCAGCGCGATCTCGTTACTTCACCTCGGTTGTTTTTCGAATTA  
AATCATTTCTTCGTACGATTTTTTCGTTTCGTTTTGTCGTTTCGTTTCGCACAATTTTTTTTT  
CCTATCACACGTAGAGCGTCGCAAATCGACGCGACAAAATATATGAAACTCGATCTAAT



TGCCGAATCTCCGATACGTTTTCCGCGAAGAAAAACGATGATTGAAAAAAGAACGAAG  
GGACAAACGGAGAAAGTAACGTGTGCGCGTATAGGTGTGACGGGGTAGAGAGGAAGA  
GGACTAGAAGGAGACGCGTGTACAGTCGCGTTTAGTAGGTGCGTATATAAATGTCATCC  
TATATATAGCGAACGTTTCGTCTAATCTTAGCTACTCGGCCACCGGCCAGGAACACGAGT  
AAAACTTACTTTGCCTCTGTTTGCTCGTCCTCCTGTCTCGCTCGCACCAACTATCCTTC  
GGTGAACCGACGCGACGCAATCGAGTTTCCGCTCTCGACTTTTCTCCCACGCGTTCTC  
TCTCGGATCCTTAGATTCTCTCTCGCGATACGCTATCTCGCGGATTCGGGATTGGATGAC  
GGTCGATCGTTGTCGCGCGTTGTCGTCATTTTTCCATCGAAAAGTGTGTATATATATAT  
ATATATAAATATACACGTTAGTGGAGATACGACGAATTCGTATTTCAAGACACGAAGAC  
CACCGGTAGAATACGAACCACTGGTTTCGCTGAACCGACCGTGGTCACCTTTTTCTCTT  
TCTACATCAACTACTCGGCTGACCTACACACCGACATTCGGTCGCTAATAATAACGGTA  
CGCTGTGGCGAGGCGTCGATATCACGATTCTCTTTAATCCGATTTCGATTTCGACTCGGCT  
CGATTCCATTCATATCTCGTTTTGCCTCGATATGAAAACGACCTATTCGCGTATCGATC  
GATCGATCAATCGATGCGAATCGTAATCGTGTTCGGCTAATCGCTCGAATTGAAATCG  
AAAACGTTTTTTTTTTTTTCTCTCACGATTCGACTCGATTAGAATCGAATTCGAGAGA  
GCTAGCCTCTCGCAAAGAGAATGGAATTTTCGAACGCGTTCAAAAAAGCGTGCGC  
GATAGAGAACGAGTTTCGCCGTAAATAATTATTACCGATTAATAAATATCGATAAATATC  
GATAAATCGAGGCACGTATTTCCGGTTGGAACGAGCGAACGATTGTAATTGCGATCCCT  
ACCTTTCCGGTTGGGGTAACAGGAGCACGGAGGAAAGAGAGGTGAACAAGAGCGGCA  
AAGCAAACCCGTCGAGGAACGGCCCTCCTCCACGATTAACCTTGGACTTGACTCGAAG  
GAATTCTCGCAGCGTACAGTGACCTCTGCTCGCCCGCTAACTCTCGACGCTCGTCGAG  
CCTCGATCCGTTTCGCGCTCGCGCTCATCTTCGGCCCGTTCCTCTCTCTCTCTCTCTCT  
CCATCCGTTCCCAACCGATTCCAACCGATTCCAACCGATTCCAACCGATCGATCCCATT  
CAAATCGAGAGAATCGAGTGCTGGCCGCGCACCGCTCTGCGCCTGCGCTGTAACGACC  
CTTCCTTCCCTCCTCGGTTCGATCGAATCGAGCGAGCGAGCAAGCTTTCCCGATAAAA  
AACTTTGGTGTATATCTCTTTTCATATACCAAACCTCTTCTCTCTCTCTCTCTCTCT  
TTCTTTCTCTCTCTGTTTCAGAAGACGTGGGTTACAGAAGTGTCGAGATCGCGTCCGCG  
TTTACGCATCTACCGCAGAAAGAACGCGAGAAAAAGAGAAGATAAGAGATGGCCAGG  
GACACACCAGGCTCCCCGATGTCCAGACCGAGAGACTTGGTCGGCGGAGTTGGCGCT  
ACTACGACCACCTTGACATCGAGCGGTTATCACACCGGCTCCGCGGATCCATCCACCCT  
TCACGGCCACGTGTTGCAGCAGAAGATACTCGAGCTACAACAGCATCATCAACTCAA  
CAACAAATTCTCCGGCAACAATATCAGGCGCAAGAACGACAATTGGCCGAACCTGCACG  
AGCAACAGATGCATCAGTTGAAGCTTTGGGAGCAGCAGAAACAACCTGGAGGAGCAAA  
GGAGAGAGAAGGAGAGGCTCGAAGCGTTGAGGAAGAAGGACAAACACGATCACAGC  
GCGATCGCTTCGACGGAGGTGAAGCAACGACTTCAGAGCTTCCTCGTGAACAAGAAG  
CAAAGGGAGGCCGCCGCGGCTGCTAACGGGGCCGTACCTGGCACACCCGGATACAGA  
AGCTGGTTGCAGCCGCAATCGGCGGAATCGGCGGGCGCAGCGAACGCCTCGCATCCGT  
ACAGGATGCCGCAGATGTTGCAGGAAAAATTCGCCGATGATTTCCCTCTACGGAAAAAC  
AG

>novel\_circ\_001628

AGATGGCCAGGGACACACCAGGCTCCCCGATGTCCAGACCGAGAGACTTGGTCGGCG  
GAGTTGGCGCTACTACGACCACCTTGACATCGAGCGGTTATCACACCGGCTCCGCGGA  
TCCATCCACCCTTCACGGCCACGTGTTGCAGCAGAAGATACTCGAGCTACAACAGCAT

CATCAACTTCAACAACAAATTCTCCGGCAACAATATCAGGCGCAAGAACGACAATTGG  
CCGAAGTGCACGAGCAACAGATGCATCAGTTGAAGCTTTGGGAGCAGCAGAAACAAC  
TGGAGGAGCAAAGGAGAGAGAAGGAGAGGCTCGAAGCGTTGAGGAAGAAGGACAA  
ACACGATCACAGCGCGATCGCTTCGACGGAGGTGAAGCAACGACTTCAGAGCTTCCT  
CGTGAACAAGAAGCAAAGGGAGGCCGCCGCGGCTGCTAACGGGGCCGTACCTGGCAC  
ACCCGGATACAGAAGCTG

>novel\_circ\_001629

AGATGGCCAGGGACACACCAGGCTCCCCGATGTCCAGACCGAGAGACTTGGTCGGCG  
GAGTTGGCGCTACTACGACCACCTTGACATCGAGCGGTTATCACACCGGCTCCGCGGA  
TCCATCCACCCTTCACGGCCACGTGTTGCAGCAGAAGATACTCGAGCTACAACAGCAT  
CATCAACTTCAACAACAAATTCTCCGGCAACAATATCAGGCGCAAGAACGACAATTGG  
CCGAAGTGCACGAGCAACAGATGCATCAGTTGAAGCTTTGGGAGCAGCAGAAACAAC  
TGGAGGAGCAAAGGAGAGAGAAGGAGAGGCTCGAAGCGTTGAGGAAGAAGGACAA  
ACACGATCACAGCGCGATCGCTTCGACGGAGGTGAAGCAACGACTTCAGAGCTTCCT  
CGTGAACAAGAAGCAAAGGGAGGCCGCCGCGGCTGCTAACGGGGCCGTACCTGGCAC  
ACCCGGATACAGAAGCTGGTTGCAGCCGCAATCGGCGGAATCGGCGGGCGCAGCGAA  
CGCCTCGCATCCGTACAGGATGCCGCAGATGTTGCAGGAAAAATTGCGCGATGATTTC  
CTCTACGGAAAACAGCCTCGGAGCCGAACCTGCTCAAGGTGCGACTAAAGCAACGCG  
TGGAGAGGAACATGGCCGCGTCGAGAAATTCACCCCTGATGGCACGACGGAAGGATC  
GGCTGCTGTCGCACCTCAAGCGGAAATCATTGCTAGCAAATTCTAGTAGTAATCCAGAG  
TCCGGGCCTAATTCACCACCGACCGTGAACAATTCTCAAGCGAGCCCCACAGCGGGTG  
GAAACGCAGCGGCGATCCAAGAAGAGACGGAGAACACCGGTTACGGGGGTCCGTTG  
ACCAGCAGCAGTCAACAAGGTAGCCTATCGGATCTTTCGTTGTTTCAGTTCACCGTCCAT  
GCCCAATATCTCGTTGGGACGACCTCACGTTCCATCCGTTTCCAACACGACCGGTACG  
AAATTGGCCACGGTCTCGGAGGCAGAGGTACGCGCGGCGTTACCGGCACGACTAGGA  
ATGCCGCTCACGGGACAAATGTTGCCCGGCACCTTGCCTTTTATCCATCGTTGACGGT  
AATCGAGGGAGGAGAGGGCGACGTCGACCGGTGGCTACGTTACAAGCAGATGCAGCA  
AAATTTGGAACATCCATCGGTAACGAATCGGCAACATCCACCGTCCGCGGTCTATCACG  
GTAGCACGACGGCAAATCCATTACGGACACGCAAGTAGCGCATGCGAGGCTGCAAA  
AGGCTGGTCACCGGCCTTTAGGTAGTAGGACTCAATCCGCGCCGTTGCCGTTGGGCCA  
TCCGATGTTGCAAGGTGGCATGATGGCGCCCCAGACCCATTACGAAGAGTACCTGGCA  
GAGAAACAATTGCACGACCAGCAACAGGCGCACAATTACCTGAAACAGCAGATACGT  
CAAACGGTGTTGACGCGAGTCGGATCTAGGGGGCAGGCGAATCAATTGGACGAAGCG  
CCTGAAACCGAGGAATCTGCCGAGGTGATAGATCTTACAGGAGGGAAGAAAGACATG  
TCGGAAGAGAGCGAAATCTCGAAACAGCAACGGGATCGTGAACAATTCCTCCAACAG  
CAGAGAGATCTGATGATGAGACACAGTTGCAGATCTCGAACGAATCTTCGACGGCCT  
ATGGCGGCAGCGGGGGCGGTAGTGGGAGCGGAAGCAGAAACAATCAACCTAGCGCA  
AGACCGTTATCCAGAGCTCTTTCAGCCCATTGGTTCATTGG

>novel\_circ\_001631

AAACATCGAATTCAAGAATCATAGATGGGGAACATGTACAGTCAAGAATTCGTAGCAA  
CAGCGCAGAATCATGGGAGTCGACGAGTGCGAATAACATGTTAGAACTGCTAGGCAT  
CATTGGTCACGAAGACAGGACGACGCTGAACGAAAGCGTAATATAAATGGAAATGACG

ATGGCATTATGTGGATACAAC TAGAACTAGCGACGAAAATGCGATAATTGTCTGAATCG  
AAAGGATCTAGAAGTCAACAACAACAAGATGATTACACGCAAATCATTAAAACTGAAC  
ATGGTATGCTACCATCGGATAATGATACGCACAATAACCAAGTTGTATTTCAGACGACAA  
AAGAATACGCAAATCGCAGACGAAGATCGTGCCACGAGAAGAGTGTCTTACATAAAA  
GCAACTTGGGGTGAACGACTTCACGTTGACAGTGATTTGGAAAGCGATTACGAGCCTG  
TTATTCATACTTCTAGAAG

>novel\_circ\_001632

GGTGCATCATCCAGCTTAGTGGTAAAGTTTCGCAGATACTGAGAAAGAGAGACAACTAA  
GACGCATGCAGCAAATGGCCGGGAACATGAGCCTCCTTAACCCCTTCAACGTCTTCAA  
TCAGTTCGGCGCTTACGGCGCTTACGCTCAGCAGCAAGCAGCTCTGATGGCTGCGGCA  
ACGGCACAAGGGACGTATATCAATCCAATGGCGGCATTGGCACACGTTGGCGCTGGCC  
AACTGCCGCACGCGTTGAACGGCATGCCAAACCCCGTCGTTCCACCGACTTCCG

>novel\_circ\_001633

GGGCGACCGGGAGAGAAAGGGCAGAAAGGAGAGCTTGGCAGTCCCGGGTTCGACGT  
CTTTTCCGCAGTAAAGGTCAATGCACAGGGATTAGGGTTAAAGAGGTTCGGTGACGACG  
CTCCGCGGGCGGGACGCTTGGCTATGCGGAAATCGTCGCTCTGAAGGGACTTCAGGAGC  
AAGGGCATAATATCTCAGCGCAGACCATCATACTGAAAGGAGAGCCAGGCGAGCC  
TGGACCACCGGGGCCACCCGGTCTCCGGGTGCCGAGGGTCTTCCCGGCCACGAGGG  
AAGGCAAGGAGCTCCGGGTGACGTTGGGCCGCCGGGTGAAAAGGGAACACCGGGAT  
CGAGTGGGCCGATTGGTCCGCCTGGTACACCGGGACTTCCGGGTCTAAGGGTGACAA  
GGGTGATAGAGGCGACCGAGGTATAACAACGTCCTTTGAACGGGGAACCATTTGCAACT  
GGAGTATTCGAAGGACCCCTGGTCCACCAGGACCACCTG

>novel\_circ\_001634

GTCCTCCCGGTGAGCCTGGAACGAGGGAAAAAAGGGAAAAAGGGCGACCCTGGG  
GAGCCAGGCCCCGAGGGTGTGGCCGGGACGCCGGGCAAGAACGGTTTTCCGGGACCT  
ATTGGGTAGATGGACCAAAAGGTGAGCCGGGGCGACCGGGAGAGAAAGGGCAGAA  
AGGAGAGCTTGGCAGTCCCGGGTTCGACGTCTTTTCCGCAGTAAAGGTCAATGCACAG  
GGATTAGGGTTAAAGAGGTTCGGTGACGACGCTCCGCGGCGGGACGCTTGGCTATGCGG  
AAATCGTCGCTCTGAAGGGACTTCAGGAGCAAGGGCATAATATCTCAGCGCAGACCAT  
CATACTGAAAGGAGAGCCAGGCGAGCCTGGACCACCGGGGCCACCCGGTCTCTCC  
GGGTGCCGAGGGTCTTCCCGGCCACGAGGGAAGGCAAGGAGCTCCGGGTGACGTTGG  
GCCGCCGGGTGAAAAGGGAACACCGGGATCGAGTGGGCCGATTGGTCCGCCTGGTAC  
ACCGGGACTTCCGGGTCTTAAG

>novel\_circ\_001636

ATCCGAATTCACAGGACGATTTCAGTTCGAGTTGGGTGCTCGGATTACGTGTTGACGGG  
GGAAAGATTGAGAGAGATCAGATCCGAGTTCATGTACTGGTTCTTCGACAAGGGGGGT  
GACGATGACGAGGGCGATTATCTGAAGGAAATTCAAGCCTCGACACCTCAGACCAATA  
AGAATTTCAATTTTCACTGCCCTTTTTTCGGATTTCAGATTCAATCAAACAGAGTATCGA  
TAAACGGTTACTTGGAGTTCACCGACCCCCAGAACGTTACACGTACCCTCTCGTGTTT  
CCTGTCAAATGTTGGCCGAAGGAGAATGACCCCAGTTTCATAGGGATATTTTTTCAGCAA

ATGTCGTATAGGGGAAATATGGTCGACGGACAGAGATCGGAGGAAGCCAGGTGTATAC  
TTTAGGATCGAGCGAGATTTGCGAACGAGGAAAGACCAACTCGGAGTGGAGATGCGC  
GAGCGTCTCAAGTGGGACGTTCTGGGAGGGTATGAGCGGGGCGGAAGGTTTCGTGCCG  
AAACACGCGATCACCGTCACGTGGAAGAACGTATCGTTCACGGGTGGCATCGACAATT  
CCCTTTACACCACCAACACTTTCCAGATGGTCCTAGCGACCGACGAGGCGAACACGTA  
CGCGATGTTCAATTATCCGCGCGTTGAGTGGACCAGCCACACGGAGGCAGGTGGCGAC  
ACTGTGCACGGCGATGGCGGTATTTACGATTTCGTTGGTTTCAACGCAGGAAACGGCA  
CAGGAAGCTACGAGTACAAGCCTTTCTCTCAAACGCCGCACATACGTGATCTGACCAG  
AGCAGGATGGGTAAACGGTTTTCCAGGACGACACATGTTCAAGATAGACGAGAAAATA  
ATTGCTGCAACTTGCAGCTAAGACATTCCATGCCT

>novel\_circ\_001637

ATCCGAATTCACAGGACGATTCAGTTCGAGTTGGGTGCTCGGATTACGTGTTGACGGG  
GGAAAGATTGAGAGAGATCAGATCCGAGTTCATGTACTGGTTCTTCGACAAGGGGGGT  
GACGATGACGAGGGCGATTATCTGAAGGAAATTCAAGCCTCGACACCTCAGACCAATA  
AGAATTTCAATTTTCAACTGCCCTTTTTTCGGATTCAGATTCAATCAAACCAGAGTATCGA  
TAAACGGTTACTTGGAGTTCACCGACCCCCCAGAACGTTACACGTACCCTCTCGTGTTT  
CCTGTCAAATGTTGGCCGAAGGAGAATGACCCCAGTTTCATAGGGATATTTTTTCAGCAA  
ATGTCGTATAGGGGAAATATGGTCGACGGACAGAGATCGGAGGAAGCCAGGTGTATAC  
TTTAGGATCGAGCGAGATTTGCGAACGAGGAAAGACCAACTCGGAGTGGAGATGCGC  
GAGCGTCTCAAGTGGGACGTTCTGGGAGGGTATGAGCGGGGCGGAAGGTTTCGTGCCG  
AAACACGCGATCACCGTCACGTGGAAGAACGTATCGTTCACGGGTGGCATCGACAATT  
CCCTTTACACCACCAACACTTTCCAGATGGTCCTAGCGACCGACGAGGCGAACACGTA  
CGCGATGTTCAATTATCCGCGCGTTGAGTGGACCAGCCACACGGAGGCAGGTGGCGAC  
ACTGTGCACGGCGATGGCGGTATTTACGATTTCGTTGGTTTCAACGCAGGAAACGGCA  
CAGGAAGCTACGAGTACAAGCCTTTCTCTCAAACGCCGCACATACGTGATCTGACCAG  
AGCAGGATGGGTAAACGGTTTTCCAGGACGACACATGTTCAAGATAGACGAGAAAATA  
ATTGCTGCAACTTGCAGCTAAGACATTCCATGCCTGTAAATAATAA

>novel\_circ\_001638

TGCAAGGACTGAACACACCTGGGAGCGATTGAAAAGCACATCCCACAGACCCCTCCA  
ACTAAAATCACTCGCCTAACCTTCCCCCTGCCACCTTATCCTGCCTCTTATCCTTCCCC  
TCCCCCTTCAAATCTCAAGAAGGTCTTTCTCTCTCTCTCTCTCTCTCTCTCTCTCTCT  
TATCTCTTTCTTTCTTTCTCTCTCTCTGTCTCTCTCTTTCTCTTTTTCTCTCTCTCTCTC  
TCTCTATCTGAACCACAGGAATCTGTGACTCCGTTATGGACAGTATGGATTGAAACCA  
GTTTTGAACGATGACCCCTCGGTCCTGACCATTGCGCTGATTATGCAAGGCAAGGA  
GGTCGGGAGCATCATTGGGAAGAAAGGAGAGATCGTCAAAAGGTTCCGTGAAGAGTC  
TGCGCGAAGATCAACATCTCCGACGGTTCGTGCCCGGAACGAATAGTGACGGTGACC  
GGGCCGACGAACTCGATCTTCAAAGCGTTCACCCTGATCTGCAAAAAGTTCGAGGAAT  
GGTGTTCACAGTTCCACGACATCCAGGGGAGCGGTGGCGTGCCAGGCCGCCCATCAC  
CCTCAGGCTGATCGTGCCCGCGTCCCAGTGCGGCTCCCTGATCGGCAAGGGTGGTTCC  
AAGATCAAGGAGATCCGCGAGGTGACCGGCGCCTCGATCCAGGTCGCCTCCGACATGC  
TGCCTAACTCGACGGAGCGTGCGGTACCATATCGGGCACCAGCGAGGCCATCACGCA  
GTGCATATATCACATCTGCTGTGTTATGCTAGAGTCCCCTCCCAAAGGTGCCACGATCCC

TTATCGCCCCAAACCCCAAGTTGGTGGGCCAGTGATCCTGGCTGGTGGGCAAGCCTAC  
ACCATCCAGGGTAATTACGCGGTGCCCCGCCACTCGGACGTAAGTACAGTATTGCCATT  
GCCCCGCGCCGCTGCCGGGCCACCCCGCCCTCGCTGAACACCCAAACTTTGACGACT  
TCGCCCTTCGCGGCCACCCCTCATCCTCGGCCTTCGCCGCTTCTCACGGGCATCCGCT  
CCTATCCACGGCCCACCTTACAACACCCCATCATCCCCTCCACCCGAGCCCCTTACACG  
CCAGCGTGGCAGGCCTCGCCGACCCCCTGCTGAAGAGTGGACACTTGACAGGCAGCCC  
TCCCGCCCCGCACACCTCGTGGCAGACGCCATGGGCAAACCTTGGTAGCAATCCGTTGGC  
TGGGCTCGCGGCTCTTGGCCTCGGAGGCCTTGCCACTCCTGCCAACACTGGTGGACTA  
AACCTGACAGCATTAGCAGCACTTGCTGGTAGTCAACTACGTACCAGCAATACGAATA  
GGCAACAACCAGCTGCAACAATCAGACGCACGAGATGACCGTGCCAAACGAGCTGA  
TCGGTTGTATCATCGGCAAAGGTGGCACCAAGATCGCTGAGATTCTGCAAATCTCCGGT  
GCCATGATCAGAATCAGCAACTGCGAGGAAAGGGAGGGTGGCGCCACGGATCGTACA  
ATCACCATTACTGGAAATCCGGACGCTGTGTCAATTGGCACAATATCTCATCAGTATGAG

>novel\_circ\_001639

GAATCTGTGACTCCGTTATGGACAGTATGGATTTCGAAACCAGTTTTGAACGATGACCCC  
TCGGTCACTCTGACCATTGCGCTGATTATGCAAGGCAAGGAGGTGCGGAGCATCATTG  
GGAAGAAAGGAGAGATCGTCAAAAAGGTTCCGTGAAGAGTCTGGCGCGAAGATCAACA  
TCTCCGACGGTTCGTGCCCCGAACGAATAGTGACGGTGACCGGGCCGACGAACTCGAT  
CTTCAAAGCGTTCACCCTGATCTGCAAAAAGTTCGAGGAATGGTGTTCCCAGTTCCAC  
GACATCCAGGGGAGCGGTGGCGTGCCAGGCCGCCATCACCTCAGGCTGATCGTGC  
CCGCGTCCCAGTGCGGCTCCCTGATCGGCAAGGGTGGTTCCAAGATCAAGGAGATCCG  
CGAGGTGACCGGCGCCTCGATCCAGGTCGCTCCGACATGCTGCCTAACTCGACGGAG  
CGTGCGGTACCATATCGGGCACCAGCGAGGCCATCACGCAGTGCATATATCACATCTG  
CTGTGTTATGCTAGAGTCCCCTCCCAAAGGTGCCACGATCCCTTATCGCCCCAAACCCC  
AAGTTGGTGGGCCAGTGATCCTGGCTGGTGGGCAAGCCTACACCATCCAGGGTAATTA  
CGCGGTGCCCCGCCACTCGGAC

>novel\_circ\_001640

GAATCTGTGACTCCGTTATGGACAGTATGGATTTCGAAACCAGTTTTGAACGATGACCCC  
TCGGTCACTCTGACCATTGCGCTGATTATGCAAGGCAAGGAGGTGCGGAGCATCATTG  
GGAAGAAAGGAGAGATCGTCAAAAAGGTTCCGTGAAGAGTCTGGCGCGAAGATCAACA  
TCTCCGACGGTTCGTGCCCCGAACGAATAGTGACGGTGACCGGGCCGACGAACTCGAT  
CTTCAAAGCGTTCACCCTGATCTGCAAAAAGTTCGAGGAATGGTGTTCCCAGTTCCAC  
GACATCCAGGGGAGCGGTGGCGTGCCAGGCCGCCATCACCTCAGGCTGATCGTGC  
CCGCGTCCCAGTGCGGCTCCCTGATCGGCAAGGGTGGTTCCAAGATCAAGGAGATCCG  
CGAGGTGACCGGCGCCTCGATCCAGGTCGCTCCGACATGCTGCCTAACTCGACGGAG  
CGTGCGGTACCATATCGGGCACCAGCGAGGCCATCACGCAGTGCATATATCACATCTG  
CTGTGTTATGCTAGAGTCCCCTCCCAAAGGTGCCACGATCCCTTATCGCCCCAAACCCC  
AAGTTGGTGGGCCAGTGATCCTGGCTGGTGGGCAAGCCTACACCATCCAGGGTAATTA  
CGCGGTGCCCCGCCACTCGGACGTAAGTACAGTATTGCCATTGCCCGCGCCCGCTGCC  
GGGCCCACCCCGCCCTCGCTGAACACCCAAACTTTGACGACTTCGCCCTTCGCGGCC  
ACCCCTCATCCTCGGCCTTCGCCGCTTCTCACGGGCATCCGCTCCTATCCACGGCCCAC  
CTTACAACACCCCATCATCCCCTCCACCCGAGCCCCTTACACGCCAGCGTGGCAGGCC

TCGCCGACCCCCTGCTGAAGAGTGGACACTTGCAGGCAGCCCTCCCGCCCGCACACC  
TCGTGGCAGACGCCATGGGCAAACCTTGGTAGCAATCCGTTGGCTGGGCTCGCGGCTCT  
TGGCCTCGGAGGCCTTGCCACTCCTGCCAACACTGGTGGACTAAACCTGCAGCATTA  
GCAGCACTTGCTGGTAGTCAACTACGTACCAGCAATACGAATAGGCAACAACCAGCTG  
CAAACAATCAGACGCACGAGATGACCGTGCCAAACGAGCTGATCGGTTGTATCATCGG  
CAAAGGTGGCACCAAGATCGCTGAGATTTCGTCAAATCTCCGGTGCCATGATCAGAATC  
AGCAACTGCGAGGAAAGGGAGGGTGGCGCCACGGATCGTACAATCACCATTACTGGA  
AATCCGGACGCTGTGTCAATTGGCACAATATCTCATCAGTATGAGTGTTGAACTGCAGAA  
AGCTAACCTAGAGGCCCAAATAACCCAAACCCCTGGCAGCGGTACCACTCCCGGGGCA  
TCCGGGGGCCAGTGCTTCTCCCTCTACCACCACTACCACTGCCTCTCCCTTGGCCAGCGC  
CATTCCCTTGGCTCAGCTGCTAAGCAAGCCAGGCGCCCTCAACGCCCTCTCTAGCCTC  
ACCGCCCTCGGCGGACTCACGGAATTGCTAGGTGGCGCTGCTGGCGCGGCTGCATCCG  
CGTACCTGTCCAGACAACCGGCGTGACCCGGTTCGCACAAGTTCACGCCGAGGCTGC  
GTAGCCCAGGCGCGCCCGGGCCAACCGACAGCGGAAAATTCAAATCCGAGCGCACCA  
AGTACAACCCGTACTGAGCAAGTGATGGACAACAGGTGGAGAGACGCGAGATCAGGG  
AGATCATTACACGTACACGCATTACTCATCACTACCACCACTACCGCCACAATTATTACC  
AACACCACTGTAATCGCAACCACAACCACCAAGATCATGATATGTACACGGAACACGA  
GATTTACATCGGAGAAAAGTGCGTACGGACGCCAGGGTAGCGCGATATCCGGATATTCT  
TCAAGACTTGGCTAAGGATCGGACCAACATATGCTATATAGTTTCTCACAGGATTATTAT  
ACAGCGTTGCCACGCTGAATGTAACAAATGCGTACATATTCGTAGGGGTAAGACAAGG  
CGCGACGACAAGGATCGAACAATTTCTTTTTTTTTTCTTTTTTTTAAATATTTGTACGA  
TCGTTTATTCTTTTTTTTTTCTTTTTTTTTCTAACTCTTACTAATTATTTTTTCGAAGAGAAAT  
TTGAAAATAATAACGCGAGGCGAGATCCGATGCTAAGTCTTCGGACCTTCACACTAAG  
TGCGACACGCCCTCCGAGTTTGATGAATCTTTTATCCTCTCGTATACCTTATTGCTAAGG  
AACTGATTTTAATTTTTTTTTTCTTTTTTTTTCTTTTTTTGTTTCTTATTTTTTGCCGTTTTCA  
TAAATATAATATTATATTTAGTTTTTCGAGAACTGTAATATCGTAACGATATGGACAATTGA  
AAATAATGATGTTAGTATCCCGTGTATCCGCCAGATGGCGACTCGGAGGACGCGACCGC  
TTGTGCACCGTCGCAAGACAGCCTTTTTTATATGTATATGTATACATATATATATATATAT  
ATATATATATATATATATATATATATAATATAATTACGATGAATTATTAATTGATTAATGTTT  
GAAGCATTAAAAAAAAGGCTCTTCTTATTATAGATTTAGGTAATCCGATGTAATTTT  
TTCTTGTAGTTGTATAGTCGACCACTTTTTGAATTGAGAGAAAGGGAGAGAGAGAGAG  
CGAGAGACAGTATGAATGTGCGAGCGGACGATTTTTAGCAATGAAACGAAAGAAAAT  
GATTAATAAAAAAAAAAAAAAATTTAGAAAGGCGTGTACGAGATTAATTATATATAATTA  
TGATTTCTTTTTTTTTTTTTTTTTCTTTTTTCGATTATATCTTTATCTTTACACGAAGAAAT  
GCAGAAAGAAAAAGAGTATATGTGTGCGTGTGCATCCGTGTGAATGCCAATGATGATTG  
GAATGAAAGAAGATAAAAATGATTAAGCGAAACGAAATAGAATGTTTCAGATATACATC  
GTGTCCCGTAATCATGTAACCGTGCTTTAAAATCAACGCCGGACATTTTCTCCGGAAT  
AGAAATATGGTCTTATCGCGACCGAATGAGAAAGAATGGTAAAAGAGAGAAAAAAA  
AAAAAGGGAAGGGAGAAGAGAATAATAATCACAGAGAGCTTATTTGCACCTCTGCTTA  
TACGAGGTAGCGCACCTCATCGAGTGTTGTGTCCGTGAGCATTAAATAACATTGTATT  
CGCTAGATGAGAGAGAAAGAAAAAAAATAAGAACACATACAAAGTAATCAATCG  
ATTTACGATAGTGGTCGTTTTATTGTAACGATAATGATGGTAATTATATACAAATAAAGCA  
GAACGTAATCATATTTACGAGATCACGCTCGATTTATATATGTATAGATATAAATACGTAT  
ATAATTATATATATAAATACACATATATATATATATAATGTATATATATATATATGTATATATA

TATACATATTAATATGGAAATAGAGAAGAAAGTAACGATTCCCCATGCGAGTTCAGAATT  
AATTAGCATTAACATAACATTTTAGATACGTATACGTATACATTTACTTATTTACACTTACA  
CACTACTATATACACACGTATACAGGTACATACAAGGATGAAAATATAAAAAAGAAAAT  
AAGAGATCGTGTTTTATCGAAGAAATATCGAGTTATTCGCTGTAAGAATCGATCGTCTTT  
TCTTCTTCGATCGGAACCTGAGGGAGATAGAATAAAAAAAAAAAAAAAAAAACTGAG  
AAGTGAAAACGAAGAATGAATTTTTACTTATTGCTCGAGATGGGAATATAAAAAATATC  
GATTTAATCGATATGTAACGCGGCTGGAAACGGAGAATCAAGGAAGAAAAAGAAGAA  
AAGACACGGCGAACGTACATCGATTTTAAATGACGATCGACTGCATTAGGAGCTCCCA  
GATCAATGTTGTGTGCTCAATTTCTAGTTTGTAGCGAGAGAAAGAGGAAGAGAGAGAA  
GATAATATAACCATGCATAGATCGAACAG

>novel\_circ\_001641

TCTGGCGCGAAGATCAACATCTCCGACGGTTCGTGCCCCGGAACGAATAGTGACGGTGA  
CCGGGCCGACGAACTCGATCTTCAAAGCGTTCACCCTGATCTGCAAAAAGTTCGAGGA  
ATGGTGTTCCCAGTTCCACGACATCCAGGGGAGCGGTGGCGTGCCCAGGCCGCCATC  
ACCCTCAGGCTGATCGTGCCCGCGTCCCAGTGCGGCTCCCTGATCGGCAAGGGTGGTT  
CCAAGATCAAGGAGATCCGCGAGGTGACCGGCGCCTCGATCCAGGTCGCCTCCGACAT  
GCTGCCTAACTCGACGGAGCGTGCGGTACCATATCGGGCACCAGCGAGGCCATCACG  
CAGTGCAATATCACATCTGCTGTGTTATGCTAGAGTCCCCTCCCAAAGGTGCCACGAT  
CCCTTATCGCCCCAAACCCCAAGTTGGTGCGGCCAGTGATCCTGGCTGGTGGGCAAGCC  
TACACCATCCAGGGTAATTACGCGGTGCCCCGCCACTCGGAC

>novel\_circ\_001642

ATGGGCAAACCTTGGTAGCAATCCGTTGGCTGGGCTCGCGGCTCTTGGCCTCGGAGGCC  
TTGCCACTCCTGCCAACACTGGTGGACTAAACCCTGCAGCATTAGCAGCACTTGCTGG  
TAGTCAACTACGTACCAGCAATACGAATAGGCAACAACCAGCTGCAACAATCAGACG  
CACGAGATGACCGTGCCAAACGAGCTGATCGGTTGTATCATCGGCAAAGGTGGCACCA  
AGATCGCTGAGATTCTGTCAAATCTCCGGTGCCATGATCAGAATCAGCAACTGCGAGGA  
AAGGGAGGGTGGCGCCACGGATCGTACAATCACCATTACTGGAAATCCGGACGCTGTG  
TCATTGGCACAATATCTCATCAGTATGAG

>novel\_circ\_001643

GTGATAAGACGGACGGAAGTTAAAGGATGCCGGTGCTGTACGCTGCCATATGTCATTCT  
TCTTGGATACAAAGCGGCGAACGCGTGCTGAGATCGCGTCAGCACGACCGCGGAACC  
AGCCAGGAAAGGCGTTACAAGCGGAGCCATCGCCGATCGCCGAGCAGCGGCCGACAA  
CACGGTGGTCATCGTGATCGCGATCGTGATCGTCTGGCGCATCCCACTTCCTCTAGACG  
TGCAAGGATCTACCGTCATCATGCCTCGTCGTCGACCAGCCAGGACCGGCATAGGCAT  
CGCTCGCCATCCTCAAGAAGTCAG

>novel\_circ\_001644

ATGCCACGAAGCAGGAGGCGTCACCGTACTCGCAGCCATTCAAGAGCACGTTCAAATT  
CTGGAGGCTCTCTTCAATATGAACACAAGAGACGCCGCATAGATTATGAAAGTCCAAG  
AAGTAAAGGAACATATAGAGTCGTTGTGCGGTGCGTTCGAGCTTCCACATTGTTGCCCC  
GGAAGGTCTTGACTTCAAGATTTACCGGACATAATTGATTGAGTAGGAAATAGTCTTTG

GCTATTATCTGAAAAAGCGATTTGAAAAATATACGTGAGTGCTGATGTGGGTTTTATCCG  
AAATGATTTTCATTGGGAAAAAGTTGCAAACGTGCGAAAGGTATAAATGAGTCGAGGTG  
ATAAGACGGACGGAAGTTAAAGGATGCCGGTGCTGTACGCTGCCATATGTCATTCTTCT  
TGGATACAAAGCGGCGAACGCGTGCTGAGATCGCGTCAGCACGACCGCGGAACCAGC  
CAGGAAAGGCGTTACAAGCGGAGCCATCGCCGATCGCCGAGCAGCGGCCGACAACAC  
GGTGGTCATCGTGATCGCGATCGTGATCGTCTGGCGCATCCCACCTTCTCTAGACGTGC  
AAGGATCTACCGTCATCATGCCTCGTCGTCGACCAGCCAGGACCGGCATAGGCATCGC  
TCGCCATCCTCAAGAAGTCAG

>novel\_circ\_001645

AATTTTTTGAGCTGATGTCTACGTCGTTGTCAAAAAATCCTGTCATACTACAAGCATCAT  
CTTCACGTTTCCTGGATATCATCCATCCTCAGTTTCATTTCGGGATCAAGTGAGCTTGTTTC  
GTCTTCCTAATATGCCACGAAGCAGGAGGCGTCACCGTACTCGCAGCCATTCAAGAGC  
ACGTTCAAATTCTGGAGGCTCTCTTCAATATGAACACAAGAGACGCCGCATAGATTATG  
AAAGTCCAAGAAGTAAAGGAACATATAGAGTCGTTGTCGGTGCGTTTCGAGCTTCCACA  
TTGTTGCCCGGGAAGGTCTTGACTTCAAGATTTACCGGACATAATTGATTGAGTAGGAA  
ATAGTCTTTGGCTATTATCTGAAAAAGCGATTTGAAAAATATACGTGAGTGCTGATGTG  
GGTTTTATCCGAAATGATTTTCATTGGGAAAAAGTTGCAAACGTGCGAAAGGTATAAATG  
AGTCGAGGTGATAAGACGGACGGAAGTTAAAGGATGCCGGTGCTGTACGCTGCCATAT  
GTCATTCTTCTTGATACAAAGCGGCGAACGCGTGCTGAGATCGCGTCAGCACGACCG  
CGGAACCAGCCAGGAAAGGCGTTACAAGCGGAGCCATCGCCGATCGCCGAGCAGCGG  
CCGACAACACGGTGGTCATCGTGATCGCGATCGTGATCGTCTGGCGCATCCCACCTTCTCT  
CTAGACGTGCAAGGATCTACCGTCATCATGCCTCGTCGTCGACCAGCCAGGACCGGCA  
TAGGCATCGCTCGCCATCCTCAAGAAGTCAG

>novel\_circ\_001646

ATAAGACTAGTGTTTCTCTTGCGCAGATATGGATTACCCTGACGAGATCTCAAGATCC  
AGAGATCTCCTCGACAAATTTAGATGTGACCCAACCAACCGATAAACTGGATAAAAT  
CTTCGTCGAGCTTTGTTGAAAGCCCTGACCGACCTAGAAGCCGAATCAGCCGAGCAAT  
ACAAAGATGAATCGGAAACCATCTCTCAAAGGGACACGAGCGCGTTTCGAGGGTATAG  
CAAAAAAGAATTTGAATGACAATCTAGGTGTACAAAAGACCACATTCTCTTTCAAGAG  
CTTCCCAGGCGACGATGACGTACCAAGCGAAGATAAATTACAGAATTCCAGTTTTGTC  
GAAGGTATTCGTTACGTAACACTTAATACACCTTCGATGAATATCGAGAAAGCGACACA  
AGAAGACGCCAGAAGCTTTACGTTTCAGAACGTGATATTGCCAGAGAAAAAGTCAAA  
TTTCAGAAGCGAATCGAAGGAACAGCGTGAGAAGACACCTGCCACGATGAATATCTTC  
CCTGTAAATAAAATGGAAAGTTTAACACAGAAACCAGCGGATGTTTCCGAGAGTCTAA  
CCAGAAGTGCTTCAAATAGCATTGCAAACGCGTTAGTCAGTCCTAAACCAACCGTAGT  
TACTCCTACAGTTTCAACGAAAAATAACGTGACAATAACGGAATTAGATGATTCTAAAG  
ACAAAACGGAGGAGGTAAATCTTCCAGGCGCCTTTGGTTGCAGCATTCACTGTGCA  
ACAAGACGAACAAGGCGTACCCAAGAGCGTCGTTCCGATCTTCAGATCGCCTAACGAT  
GGACAAGCTCTGACTCTTCAAGAGCAACTAGAATTTAAACAACAACACTTTTGAAAAAC  
AATTGGCAGAGCTTCAACAGCAACAGTTTCAACAGACGCAGTTTCTAGTGAGGCAGC  
AGCAACTATACGAACAACAATTGAGACAGAAACAACAACAATACTATCTTCAGGA  
ACAAGTCAGGATCAAACAGTTAGAGGAACAGACCAAGCTTAAACAACCTGGAAGAACA



AAGGCTCAAGCAGTTGGAGGAGCAGAGGTTGAATCGATTCCAACCTCCTCCTGTACCA  
CAGAAGCAGTTCTTCTTCGATCAGAGCAACAACTTCTTGACGTTCCAGCCTCCTGTCG  
AGTCCAACGTTACCTACAACCTAGCCTGACTTTAGAAGTGCCAAATGTAGCTGCGCC  
TCCAACCTTCCAACCGATCTTCCAACAAGACTCATTGCGTCTGCAACCCTTCCGGCAA  
CAGCAGCAATCACAATACCTCCATCAGCAGCAACAGATTCAACCGCAACAGTTGCAAC  
AATCGCAACAACAACACCAGAGACTTCAGCAGAGCTTCGGCTCGTTCTCGACCGATTT  
CCAGCCTTCGGTATCCACGAGATTCAATCGTCAGGAGGCTTTTAATTTGGTGGGAAATT  
TTGGTTTCAACGGAGACAATAAGATCCCAGCCAACAGAGGCAACTTTGGCTTCGTTCC  
ACCGCACAGAACTCCAGCGAATTTCTACAATCCTTATGCCCAGTTCAAGCAATCGAAG  
CCTCCCACGCCGGAAGGCAGATTCAACATCTGCTGTACCAATCTGGAATCGCTGGCG  
ATCCGAATAACGTGCAAGGAATTGGAATCCGGAAGATTTGAATATCGTTTCGAAGGTT  
CTGGCTCTGAACGTGGGCGCAGTGCCGAATAAGAATCTCCAGTTCGCGACGAATCCGG  
GTTCCAGGTCGTTGGGAAAAAATCCGCGTGAAGAAAGAAGATGGAGGATGGAGTTA  
GAGACGAGTCATGTAAATCGGTGCGGAGGACGATATTAGTAAG

>novel\_circ\_001650

AAAAAGACTACCGAATATACCTCCAATTA AAAAATCCTTTATTAAGATTAAGTGCAACTA  
CAATAGCAAAAAAATCAGAAATGGAGATCTTAAAGCGAGACAATAGTGAAAATATA  
TATCGATCGTATCCAAGAAGTAAATCCTTTTATAAACGCAGTAATAGAGGACAGGTTTCG  
AGCTAGCTATAAATGAAGCAAAATTATACGATGAACAGTTAAAAAGTGGA AAAATTCACT  
ATACACATATTGGA AAAAGGAAAAACCCTTTATGGTGTACCAATCACTATTAAAGAAAG  
TTGTTGTCTATCAGGAATGAGTTATACCGGAGGTTCTTTATTAAGAAAAGGAATAAAGG  
CCTTAGTAGATGGACCTACAGTAAAAATAATAAAGATGCTGGAGCCATTCCTTTATTA  
GTTAGTAATACCTCTGAATTCTGTACAAGTCTACATAGTTATAATTTTCTTTATGGTCATA  
CATTGAATCCATATGATAGAAGAAGAACACCAGGAGGATCATCAGGAGGTGAGGCCGC  
ATTACTTGGTGCAGGAGCATCACTCATGGGACTTGGTTCGGATATAGCTGGTTCCATAA  
GGATACCATCTCTCTTCTGTGGTATTTTGGTCATAAACCTACTGCAG

>novel\_circ\_001651

ACACCATATCTTTCACGCAACAACCTGCAACAATGCTCGAGGGGAGCCAAGAGTCGTC  
CACTCAGCAAACTTTTATCACCTCTGAAAAGTGAACCGCAAAGTCCTATCTACGCTTCA  
CCACCTCATTCGCCGTTAAGTGACAGCCTGATACCTTATTCGCCAACAAACACAAGTCC  
ACCTAGTGCTCAGACCGCAGCGAATGTGATACAGAATCAACTTGAGTATCATTGTAA  
CTGGA AATCAAAATATACCATATAAAGTGCAGATCGGAGGATATAATCATACATCGGCTA  
TTTACGAACCGATTAATATAAAAACCGAGATCATCGATAAAAATGAAATTAGCAAACCA  
TTTGAATTAACGAACGAAATGTTAGGTTTAAAGTGTAACAAAAGATAAAAAAATGGAC  
TTGATGAAAAAAGAAATTCAGCCGACACTCATTTCACTAGAGATACTCATATGAGAATA  
ATATTGGGTAAATAGTGGTGCTGGTGTGGCAGAAGCGTAAACATGCTTCAGATCATAC  
ACCTGCTAGTGCAAGTAATGCAAAACCAAAGCGTAATGGTTTGGTTTCCAATCCAGCC  
ATGAGATTAGTAGCAGGTGTTAGGAATGGAATTGAAAATGCAACTAATAGAAACAAAC  
CTATCACAACGCGAGTTAATGGATTTCAGTGGAAGGCTGAGGCACGAAAGGAAACAC  
CTTTGTAGGGACAG

>novel\_circ\_001652

GCAGTGGTTAAAAATATGTCAGAACACATGTCATCAACTGAAAGTCACGAATTTGAAC  
AAATAAGAGTTTTAACTCTAAATAATGGAGAACATCTTGATGGTATATTATATAGATTAA  
AGAAAGGATGGAGAGTAGAATTTTCGTTTAGGCGCTTCTCTTCTTGGAAGAACTGTTGA  
TCTTTTTATAAATTATCCTTTAGGAGAGAATAAAAAATTTGAAAGACATACATATTATCTC  
TTAGAATGGATTAATGAAACAGCTAATATATGTTTATCTCTAGCTGGTTCATTTCAATTATT  
ATCTTATAGATCCTAATTCTGAAGGTATGAAGCCTATTGCTTCTGGATATCTCCTTGTAGA  
TCCAGAACTTAAAAATAGGGGAACATGGGAATGATTTACCATTAGATTGTATTCAATGTC  
AAACTGTTCTTGCAAAATGTTTAGGATCATTTTCTACCTGGGAAGATAAATTACTAGTCG  
CTAAAAATTCTGGATATAACATGATTCATTTTACACCAATTCAGGAATTGGGATATTCTA  
AATCTTCTTATAGTCTTAGTGATCAATTAATAATTAATCCTTCTTTTAATGATGATAATAA  
ATCAATTACATATGATGATATTGAAAAATTAATTAATAAAATGCGCAATGAATGGAATATG  
TTAAGCATCTGTGATATTGTTTTGAATCATAACAGCAAATGAAAGTCCTTTTTTGGTATCT  
CATCCAGAATGTACATATAATTGTTTGAATAGTCCTCATTACGTCCTGCATATATTTTGG  
ATGCTGCATTATTTGAATTAACAGTGCAAGTGGCTGCTGGAGAATGGGAATTTAAAGGC  
ATCCCTTTGATAGTTGAAACTGAAGAACATTTAAATTCAATTCGTCATGCACTTCACAC  
ATATTTTTTGCCGCTTATAAAAATACACGAATTATATATAATAGATATTAATGAAACTATTG  
CTGAGTTTTTGAATTTAGCACGAAATCAAATGCCTCAAGACATCATTGAATCATCAAAA  
ACATCAGAAGATATTAATAATAACAAGATTCAAATTTTCGCAGATTAAAGCAACTAT  
AAATATGCAACTTGCTTTACAAAAATATAACATATATAGAACTGATTGTTTTGATGAAGA  
GACTCGTTTGAAACGTTGTGCTGAAGATTTAAGAAAAAAATTGCAGGAACCTTAATAATA  
TAATCATTAATGAAATACAAAATCATTTAAATGCTGCAGTTGAAAATACAATTGCTGGTA  
TAAGATATTTTAGAGTGCAAGTTGATGGACCTAAACTTAAAGAAATAAGTGAAAGAAA  
TCCACTAGTTCCTAGATATTTTACTGATTATGGAACACCTAAAACATTAAGTAAAGAG  
AAGCAACAATGTATTCAGATGCAGGATGTTATCTTATGGCTCATAATGGATGGGTAATGA  
ATGGCGATCCTTTAAAAAATTTGCAGATTCTGATTCTAATGTTTATATAAGAAGAGAAC  
TTATTGCTTGGGGTGATAGTGTAATTTGAGATATGGAGATAAACCAGAAGATTGTCCT  
TTTCTATGGCAGCATATTAGTACATATGTTGAACAAACAGCTAAAATTTTGTATGGTATT  
CGATTAGACAATTGTCATTCAACTCCTATTCCAGTTGCAGAG

>novel\_circ\_001654

AGTTATCGAAAGATCGCCCGACAAGTAAGTACGCCGGATAGCGCGCCGGCAGGCTTAG  
GCAGCCCACAGACTGGAATAGGAGGGCTGCAACAGCATCAGCAACAAGCGCAACAGC  
AATCGCAACAACGCTTCATCAGCCGGATCCCATGCAGCAATCCAAGGACAATCTGAA  
TCCGGCGGCGAACCAGCAAACCGGGGCACTTAGGAACGGAAATCCTCCGCCTCCCGT  
CGTTTCTATA

>novel\_circ\_001656

TCCCCGTGATGCCACCGCCGCGGATCGTTTGGAAACGTTAGCAACGGGCCCCGAAAAA  
TGGCCTCGATCTTGGGAGACGGGACGGACCCAGGGGGCTCGGGGCCCTCCCGATGCC  
TGTTGCTCCTGCAAAGGTCCCTCGCGATCCAGCTGACCAGGGGGCCCGCCTCCGCAGGT  
TCTCAACGCAAGCCAACGCGAGAGTCCCAAGGAGCATCCAGCCGACGAGATGTGGAT  
GTACGATAAAGGTTACAATTTGTTTCAGAGTTTCTTGGAGGCGAACTCGAAATGCTGGT  
GGAACGCAGCCCTGGTGGACGCAACCCGGCAACTCAGGTACAAGGGCCACGTGTCAC  
CCGGCGTGCTGATGGTCGGCGGACCACCCTGTGCCCTCGAGGTCTTGAGGGCAGCCTG

GGCTAGGAATGTCCTACGACCGCCTGCCGATCACGCGATAACTTGCCTCG

>novel\_circ\_001657

ATTAAACCAATAAACATTCTAGACGGATGATACCATAAGGGTATGTACGGGAACCAGAA  
ATAGCTTTACGTTGCCAATTAGCCCAGGAACTTCATTTGAAGTAGAGGTACTTGAAAA  
CGAAAAGATGGAAACCCGTATGGTTCGCTGTTTGAGTACAATCCGCAAGCCAGAAAAT  
TTATCTTCTGGAACCTCAATTCAGACTAATCTGAG

>novel\_circ\_001658

AAAAAAAAAGAACAAGACGTACTCAAAAATTTCAACGTGCTATTGTAGGTGCATCTCTT  
ACAGATATTTTAGCAAAACGTAATATGAAACCAGAAATTCGTAAAGCACAGAGAGAAC  
AAGCTATTAAAATGTCTTAAAATAAATGAATTGCTTCACCCAGAATTGTTATATTCATTG  
CACTGTCTGGCTTTTTCGCGGTTTCATACAAATCTTATACATATAGATATTATTATGTACA  
CATCTTATGTTATTATATTTATTAATAATATATATGTTAAATAAATTCTATTTTAGAGCTGC  
AAAGGAACAAAAGAAAGCTGCAAAAGCAACAAAGAAAGCAGTTGTACCTCCTAAAA  
CAAAGGCTATTCCAAAACATAAAGCTGCAAAAATAACACAAAAATCAGCTCCACGTGT  
TGGAGGAAAACGTTAAATTTTAGCATTGTATAAATAAAAAGATACTTTATATTTAAA

>novel\_circ\_001660

AGAGGTACGTACAGTCGTGCTCAACAAAGGCTCCTCCGGACTGGGTTTCAATATCGTC  
GGTGGCGAAGATGGCGAGGGAATTTTATTTCCTTCATCCTAGCCGGAGGCCCGGCCG  
ATCTCAGCGGTGAGCTACGTTCGTGGCGATCAGATACTCAGTGTCAATGGCATTAACTCTT  
CGGACAGCCACCCATGAAGAGGCCGCCGCGGCCCTCAAGGGCACCGGGCAGACAGT  
GACGATCGTGGTACGTACAAGCCCGAAGACTACAACAGATTCGAGGCGAAGATCCA  
CGATCTTAAACAGCAGATCTCTCAACAGAATTTGATGACAGGCACCCTAATGAGGACT  
TCGCAAAAGAAATCGCTTTACGTTAG

>novel\_circ\_001661

CAGGGCGACAAGAACCTGGAGAACGTGACGCACGAGGAAGCGGTGGCGACGCTCAA  
GGCGACCCAGGATCGCGTGTTCTTCTCGTGGCGAAACCGGAAACCGGAATCGTGCC  
GCCGCCGCCACCCCAATAGCCTCGGACAATTCGCTCTCGCCGCAACCACGAAAACAA  
AATGGTTCCGTGTCAGCGCTGGAGAACAACCTCGACGCTGCCGTATTCACAGGAATCAC  
GTCACGCGTCTTCTCTTGCTCTCCATGGAGCGGCCACGCCACGAGCAGTTTCTCAGGA  
GGACGTATCACG

>novel\_circ\_001662

GTCAACGAGACGATGACTGGGAGTACGAGGAGATCGTGCTCGAAAGGGGTGGCGCC  
GGGCTTGTTTTAGCATCGCTGGGGGCACGGACAATCCACACTTCGGCAACGACACTG  
CTATTTACATCACGAACTTATACTCGGCGGTGCCGCGTCCGCTGACGGCCGTTTACGC  
GTCAACGACACGATACTCCAGGTGAACGACGTTTCCGTAGTCGACGTACCGCACGCGG  
CTGCCGTCGACGCGCTTAAACGGGCGGGGAACACCGTTAAACTATACGTGCGCCGACG  
GAGACACACGCAGCTGATCGAAATCGAGCTAATTAAGGGTAACAAGGGACTCGGTTTC  
AGTATCGCCGGTGGTATCGGCAATCAGCATATACCTGGCGACAATGGGATCTACGTAAC  
GAAAATTATGGAGGGCGGTGCCGCACAAGTGGATGGCCGTCTTGTCGTTGGGGACAAA

TTGGTGGCCGTCAGGAATGCTCTGCAGGGCGACAAGAACCTGGAGAACGTGACGCAC  
GAGGAAGCGGTGGCGACGCTCAAGGCGACCCAGGATCGCGTGGTTCTTCTCGTGGCG  
AAACCGGAAACCGGAATCGTGCCGCCGCCACCCCAATAGCCTCGGACAATTTCG  
TCTCGCCGCAACCACGAAAACAAAATGGTTCCGTGTCAGCGCTGGAGAACAACTCGA  
CGCTGCCGTATTACAGGAATCACGTCACGCGTCTTCTCTTGCTCTCCATGGAGCGGCC  
ACGCCACGAGCAGTTTCTCAGGAGGACGTATCACG

>novel\_circ\_001664

GTCAACGGAGACGATGACTGGGAGTACGAGGAGATCGTGCTCGAAAGGGGTGGCGCC  
GGGCTTGTTTCAGCATCGCTGGGGGCACGGACAATCCACACTTCGGCAACGACACTG  
CTATTTACATCACGAACTTATACTCGGCGGTGCCGCGTCCGCTGACGGCCGTTTACGC  
GTCAACGACACGATACTCCAGGTGAACGACGTTTCCGTAGTCGACGTACCGCACGCGG  
CTGCCGTCGACGCGCTTAAACGGGCGGGGAACACCGTTAACTATACGTGCGCCGACG  
GAGACACACGCAGCTGATCGAAATCGAGCTAATTAAGGGTAACAAGGGACTCGGTTTC  
AGTATCGCCGGTGGTATCGGCAATCAGCATATACCTGGCGACAATGGGATCTACGTAAC  
GAAAATTATGGAGGGCGGTGCCGCACAAGTGGATGGCCGTCTTGTCGTTGGGGACAAA  
TTGGTGGCCGTCAGGAATGCTCTG

>novel\_circ\_001665

GTCAACGGAGACGATGACTGGGAGTACGAGGAGATCGTGCTCGAAAGGGGTGGCGCC  
GGGCTTGTTTCAGCATCGCTGGGGGCACGGACAATCCACACTTCGGCAACGACACTG  
CTATTTACATCACGAACTTATACTCGGCGGTGCCGCGTCCGCTGACGGCCGTTTACGC  
GTCAACGACACGATACTCCAGGTGAACGACGTTTCCGTAGTCGACGTACCGCACGCGG  
CTGCCGTCGACGCGCTTAAACGGGCGGGGAACACCGTTAAACTA

>novel\_circ\_001667

GTTACGTTAAATGCGTTCGATCGATCGTAAAGAAACCGAGAAGGGAGAGAGAGAGA  
TGGAAGAAATCGCGGGTAGACAGGGTGGACAGGCAAAGAAACAGAGATGTCGTAAT  
TTAGGTCGAGATAAGAAACGTGCCGGGTGTTTTCTTGTTATCCGCAGTTTTTCATTATA  
CCGTGGAACGGGCCGACAGATTAAATATTGTTGGGAAAAGAATGGCCCCGACAGAAT  
CGAAAACAATACGAAAGTCTGTCGATAGAGCGAGTGATACCACCACGGCTTCTAAAAG  
GACGGTTTTCTACCTTTCTTTTCGCTCTCGACATGCGCTTCTTTCCGCTCTGTCCAA  
GTTTAACTTGGAACGATATTGTAAGTCCACTTGTGTGTATATCGATATTTCTGTCAAAC  
AAGATCGAACATTAAACGAGAACTGTTTCGAGCTGGAATCCCGTATCTGTCTATATAC  
TCTCTCCACGCTCGAAAAATATACACTTGTAATTTACGCGGCAATCGTTCTGTTTCG  
CTATTTCAAACATACATACGTGCATATGTAGTTATAAAGAGAACTGGTTCGGAATATTATA  
TGATGATGCATGGTAATTCTATGAAAAATTGAAAGAAAAATAGAATAGCATGGGAAACG  
TTAAACCCGTGGAACAAAAAAATATCATGAAAATTTGAAAATTTGGGTCAAACAAAAT  
GTCGATATTTGAAAGAAATGGAATATATTATCGCAAAAAACACGATATTTTGTAAAAA  
TCGAACAAATCTTGTAATTCCTATGATAATATCGAATAATATAAGGATTCAAATTTGAGT  
TCATTTAAATTTCTAATATTTATTCTATCCAAATTTTCTCTCTTATAATCCAAATCTGAT  
TTTAGATGAGATATTTTAAACGTGAAGAGGCTGGTTCAATGGCTGTCAAATTTCTTTCT  
CTTCTTCCATGGGATTTACTTCCACGAAATATAATTCCCCGTATGATAATCGCAAAGCTT  
TCAGATTATTGTGCATCGATGCAACGATTGTCTGGGCGCAGTTAGTTATAACAGAGCG

CGTAGCATCGGAACGAAATCGATGAACGAAACGACTCTGGGTTGGATTAAACCACGCA  
TATCTGGCATCCATTGCAGGTTGCTGCGCTGCCAAATATTTCTGTCGACAACGAGCAGT  
GGGAAGACACTGAAATATGACCTGTGGCGGCCGCGCTACTGGATTGCGAAATCTGGAT  
ATATCATGCGGAATAAATGACCCAGGCTACAAGTATTATCAAACTGGTGTGGAACGA  
AAAAACGAGAACTGGAACGTTGATGAAAATCGTGACAGATACGAAAATAATTCGAAA  
CGGTGGAACGTCATTAATATTAACGAGAACGATCGACAAAG

>novel\_circ\_001668

ATATCCAGGAGTTTTACGAGCTGACGTTGCTCGATGAGTCGAAATCGGTGCAGCAGAA  
AACGGCGGAGACGATCCGCATCGCCGACAAATGGGAAGCCAGCGATGGGCCAATTAC  
GCCGACCTTCGCTCAAAATGACGGTGGTCCAGACTTCCCGGTGAACCAGACTCTGTCTG  
AACATTTATGGCCGTAAGTCGGCCAGTCCAGAGGCTCCAGACCACGTAGACGAAACTC  
AGAAACACAGTGACACAATGATCGATTGGGTGTCTATCGTGCGTCATTCGCGACGTCG  
TTTCAGCGACTATATGTACGGCGTACCTATTAAGGTACGCAAACGAAGAACAAAGAGA  
ACCTGTCACTTCGGGGAACACGTAAATCGTAGCGTTGTCACGCGTGCCTCGAAACGAT  
CGACCAGTTTTTTGCGGATGCTGTTGGAATCACAACGATTTTGAAAAAATGATTTTCTA  
AACGTGCCGAAAGTTAGACCGAGCGATATCGTGAAAGTGCAACAACAATCGCAACAA  
CGAACTAACGCGGAATTAGAACACGAGCAATCGTGTGTGAAACGTAAATCATCAAGAT  
CGGCCAACTTGCGACGGAATAAATTGTTTCGAATGATTTTCGATGGTCTGCACAAGACC  
CGTTACGCTGGTGGAGGAGTAGAGGAGCAGCTGCCACCACCGCCGTCGCCACCCAG  
TTGAAAGAGGCCAGCCAGCTGGATGGAGTTCCTAGACCGAATTCGGTCGATCGTATCC  
TACATCCCGACGGTAGCCAGCATATCCTAACTAGCCACGATACTCTGAACAAG

>novel\_circ\_001669

ATATTTCTGTCAAACAAGATCGAACATTAAACGAGAAACTGTTTCGAGCTGGAATCCC  
GTATCTGTCTATACTCTCTCCACGCTCGAAAAATATACACTTGTAATTTACGCGGC  
AATCGTTCTGTTTCGCTATTTCAAACATACATACGTGCATATGTAGTTATAAAGAGAACT  
GGTTCGGAATATTATATGATGATGCATGGTAATTCTATGAAAAATTGAAAGAAAAATAGA  
ATAGCATGGGAAACGTTAAACCCGTGGAACAAAAAATATCATGAAAATTTGAAAATT  
TGGGTCAAACAAAATGTCGATATTTGAAAGAAATGGAATATATTATCGCAAAAAACAC  
GATATTTTTGTAAAAATCGAACAATCTTGTAATTCCTATGATAATATCGAATAATATAA  
GGATTCAAATTTGAGTTCATTAAATTTCTAATATTTATTCTATCCAAATTTCTCTCTCT  
ATAATCCAAATCTGATTTTAGATGAGATATTTTTAACGTGAAGAGGCTGGTTCAATGGCT  
GTCAAATTTCTTTCTCTCTTCCATGGGATTTACTTCCACGAAATATAATTCCCCGTATG  
ATAATCGCAAAGCTTTCAGATTATTGTGCATCGATGCAACGATTTGTCTGGGCGCAGTT  
AGTTATAACAGAGCGCGTAGCATCGGAACGAAATCGATGAACGAAACGACTCTGGGTT  
GGATTAAACCACGCATATCTGGCATCCATTGCAGGTTGCTGCGCTGCCAAATATTTCTGT  
CGACAACGAGCAGTGGGAAGACACTGAAATATGACCTGTGGCGGCCGCGCTACTGGA  
TTGCGAAATCTGGATATATCATGCGGAATAAATGACCCAGGCTACAAGTATTATCAAA  
ACTGGTGTGGAACGAAAAACGAGAACTGGAACGTTGATGAAAATCGTGACAGATAC  
GAAAATAATTCGAAACGGTGGAAACGTCATTAATATTAACGAGAACGATCGACAAA  
G

>novel\_circ\_001670

>novel\_circ\_001671

```
>novel circ 001672
```

ATTGATATTGGCAAAGATAGTGGGATTTGACTTGACAGTTTTGCCAGAGGATTTTTATAT  
GGTCTTTTTACTTTGTGGAACAGACAAGGATGAGGGTGCAGTCAACGTTGGGACCGGT  
AGCCCAAAGACACACGCGGATCTCACGCGTTCTCTTCACACCCCTCTCGTCAAGCAC  
CCCCTTCTGACACCTCTCACATCTTCGAACGGTTCGTACGGCCCTGAAAGAAACGTGGC  
GTGATTCGAACTACGTATTTCTCTTTCTCTCTCTCTCTCTTTCTCTTTCTCTCTCCCTTC  
TTAGGACACGCTCCAAGTCCTGAGGCAAACGAACGTCAGGAGCCGTATACATCGGCCA  
TGGTGCTCGTTTACCGGGCCGAGTGGTGGGTGTGTGATAAAAATATAATGCTGGTGACG  
CGCGTGACACGATACAACGCGATATGACAGTTCCTTCGGCTCTTTCGTCGTCGTACATA  
CCCTGCTGCGTATGGATTGCGGTGTGACCAGACGATAAACGCAATGTTGTGACGCGTG  
ACACACCGCGCACCGGTTCGTCCGCGTTCGCAATGCTCAGGGACGTTGCCACTGTTCTCT  
TCGCCCTCTTCTCTCGCGCACATCCGAGCATGGATGATAAATGCTCGAGCGAACGGT  
AAATGCCAACCCGGGACCCGAATTTATCGATTTTCGTACACACGCGTATCATTGATCG  
GTATATGTGATTTATTCTACGCTACGGATAATCGGTGTGCTGCGTTTTCGTTCCGTGTAAC  
GTTTCTCGTTGTTTACCAGGATTTTCCATTTCCACACCGTGTACAGGTTCTCGCAGAA  
ATATGACGCTACCGCTACGCGCCTTTTTGAGGACAATGACCCCGTGCACCTTGCTTTCT

TCCTAGTGTGTCTGACGTTTCGTTGCTGATTTTAAACGTTTTTCACCTATTTTTCACTTTTCG  
CTCCATTTGTTTCGAACAAAGGACATTTTTTTTACACAAAGGAGATTATTTTCGAATATTTCT  
ATTATACTGGGAAACGAATAATTTTACGTATACGTTACACAAGATTTTCGGGTTTAATACG  
ATGCGTGTACGGAAAAATCGTACGTGTATCTTCCAATCGTACCGCGACATTTAACAACA  
AGAACTTTATGCGATACTTTCAATAATGCCACACGGTATAGTGACACTAAAGTCATTAGT  
AACGTTCCAAC TAGACCGAATGCGGTTTTTTCGGTACTTCAATTTCAATGGAAACATAC  
GCAATGATGCGTGTATTATAGACGTACCGTTGAAATAACATCACAATTCCTTTTTTGT  
TTTTCTTTTCGATTGTTTGCCTTGCATAATTCCTACTACAATCTACAACGTATATAAGCAGA  
CAGTATAAGAGATAATATTTTTATCCAATCTCTACCAAGTATTTTCGTCTTTCTTTTTTCTT  
TTTTTCCTTTACAACGTAAGTATCATGATCGTCTGATCGTAAAATTGATTATTTCTCTCCC  
GCAATTTGATTTTCATCTTATGAAATCTTACGCGTATGTGTGCCACCTACGTTTCCCTATTG  
TGATTTCCCTCTCTCGTCGCATGAGCATATTAATCAGTGTTGTGGTTTACTACAATGCAT  
TCCAACATGCATAACACTGAAATATTCTCCTTTATGTTCTCCCCTTCTTCCATCATTCTTT  
TACTCTGTGTCACTTCTCTGCCTCAAGAGCAATCCTCTACTCTTGTGCGAGTCTACTCCA  
ACGTATCCCTGTGTACAGGCTAACGTAAGAATGAAAGGTTAAAAGCATTACGAGCCGT  
GCAGCTCTCCCCGACGAAAGCGCGCAAAGCAAATCGCACGCTTGCAAAATTTGGAGGA  
TTATCGATCGAACATATTTCTGCCAAGTTTGTACAAAGGATAATCGATGTTACTACGGA  
TTGGTGAAATTTAAAAAGGAATTGAAAAACGAGAACAGAGTTAAGTCCGTGTAGCA  
CGTTGGTTGGTGGATCCCGTGGTGGCAACGAGTGAGATTCCCCCGCAGACCGATAAAG  
TGCAGCTTTTTATTTTCCACTTTTTAGGACGAGCATTCAAAGTGAAAAAGATTGTGTC  
GGACTAATCCGCGATTTCTGTATGGCGGTAAAAAAGAGCAACAATGAAAAT  
CCGTGGAACATATGTGTGTTTCGATGAGAGATTGGCTGAGAAATCTCCACGTTGAATCGT  
GTTTTTTTTTTCCTTTTTTTTTTTTTTGGGGGGGGGGTAACACGCATTGATTTTATTT  
CTATGTTACGCTGTTGCGTGTATCGCGCGAGTGAAATTTTTCGATCAAGAGATTGGA  
GTTTGGTCGAGATCGATTGATCCGATAATTATTTGGAAATGGACCGTTGTTTCGCCGTG  
GAAAAGAAGGATGGAGAAGAGAAATTCGACGTTTTTCGAGGAGAGGCGATCGTCTTT  
CAATTTTTGTGATCATCGGCTCAACGCATCGCTCGACCATGAATACTTGGAATTTGAAG  
AGGTGTCGTTTCTTTGTGATGAAGTGAACAACGTTCTCGAAAATGATCGTCGATCGAG  
TTGCTTTGACAAGAATTCGTATATAAATATTTGTACAGAAATCGAATGAACAAACCGAG  
TGTTTCGAAATATGCATCGTGAAAAAGAATTAAAATTCGATGGGATTCTTCCGTATCCG  
GATCTTTAATCGAAGAAGATTGTATTATATGGAAGATCGTCATGTTTGAAAGACATTATA  
TTTACTCTTAACGAAATCGAATTTAAACAAGATTCCAAAATTTTGGGAGAAAAACATG  
GACAATAACCATGGAATTGGCGAAAAGAACACGAAGGGTGTGAGGATGCTGGAACGA  
CAGGATTCCACTTGCACCGGTTAAAATGAATCGCAGGGAAGACCCGCTGTTGCGGCAG  
CATCGCAACCGCTTGCTGCAATTAGCGGAGGTGACAAACATCAAGCCTGGCCGTGGCA  
GCGGGAAAAGACGAGGCCAGAGGCAATCGTACGTTTTCGGACCCAGCAATGGCGGTT  
CGAGTACCGGTAGCCGCATCACCTTCAGGATATCGTGAGAAGCGATCCTGGATACAC  
GCCAAACATCGAGCATTTAGTTTTCCCGGAGCGCAAAAGCAGTAATCCGAATCTGGCC  
AAAACAGCCGAGGAATCGCCGCCAAACAAATCCAAAGTCAATGCAACCACCTCGGGG  
AGATCCAGGCTCGCTGAAGTGTTCTCCAGGCATTATTCGAGAGGCTCGTCCCAAGACT  
CTTCTGTTACGTCCAGAAAGAATCACTTAAACAGCACGTCGCTGGACAGCGGAGGGA  
CGGTGGTGGTGTCCCATCAGGCAACAGGGTCGAGCGTATCAACGGTGGTGACGAGAG  
GCGGCGGCGGCGGCGGTCGCCGTTGGTTGTGCGCAGAGTTCGCAATCCTCGAGGCAAC  
ATTCGGCCGAGGACGGGGTACGCGGGGGCAACGTGGGCGTCATAGGGCCCGTTTTCGA

CCTCGTCCTCGAGCCAGGCCCTGCTCCCGCCCTGCCACCTCGTAGAGTCAGTCCAGC  
CGCGAATTCTGCCGACATCTCGAATACGGCCACTGGCTCCCGCGGCGACAGAAGATCC  
CGCAGACGATGTCGGTTAAAAGAAGTCAAAACGTGTGATCCTGCATCTGCGCAGCAC  
CTCGGATCCCTGGGAAGTCGGTTCTCAGGGTTCTTCGTACAGCGTCGGTAGCAATAAA  
AGTCAAAGCGGAGGCAAAGGAAAATCAAGTGGAACGCCCCGGGGCTCGTATACACGA  
GGCACTTCAATACCATCGTTGAAACGGCACGATACAACGGCATCGGCAACGGCATCGA  
CTTCCAGCCTAAAGCAACATCGGCAGGACAGCCATAGCCAGGTGACGAGTTCTCGTCG  
TCGAGAATCCTCGAATTCGTTCTGTCGGGTAAACAGCGGCACTTCCGGCGAACTTTTCA  
TCAGCGGAGATTGCAGCAGGGAATTGTCGCCGGTCCGATGGTGCGACAGAGAAGTGG  
ACGGCGTGTACCTGGGTCGATCCGGTTGGGTTTCAGGTGCAGCAACGATCCCTGGACGA  
GAATCGGCGCACGAGCTACGAGAGTAGCCTGGTGACGGGTGCCACGGGCACTCTCCC  
GTTACCGCGGCGAGCCACGGTAAAATTGGCCGATTATCATTGCAACAGCGAGCCAGGC  
AAATGCCCCGACGAATTTCTTCGATTGGACAGCCAGAGGCCGGACTATTTGGCCCTTC  
ACGGTCAAGATTTTGAATCCGTGGGGAGCAGCGCGTGCACCTCGCCCCACAGTATCCC  
GGAATCGTATTCGCCGCCCTCGATCACACCGATAATCTCCCCGCCACCGGCGTTCCAGG  
ATGCCGTGCGGAAGAAAACAACCTCGTCCAAGCATTCGTGCGGGGCGCAACAATTACG  
GGAAACCGCCTTTCTCTCCCCGTTCCAACGCCATAGTGACAGCGATATCATCAGCCCT  
CCACCTTCGCCCCCGCACCAAGTCAATTGGAGTTCTTGGCGCCACGTCCCGAAAAT  
CCTCGAGCACGCCGTCCAGAGCTCGGAGGCAGAACAGCGGCGGTCAACAGCAGCAG  
CAGCAACAACAGCAACAGCAACAACAGTACAGAATGGCGCAAGCCAAGTCGTTGGA  
GGATCAGTCTTCGTGCGAGGAGGTGCAATTCGTGCAACGTTATCTCGAATCGTCGAGCT  
CGTCCTCGTCGTCGGTCGGTTTCAGAAGTCTGGATAGCTGCGTGACGAGATCTACCATG  
CCCAGATTGGCGGAGAACACGGATTCTCGGTGGAAGGATACGACGACGGAGACGAC  
GAGGACGACAACCCGAGCTCCTCGTTGAACCTAAGCCTCGTCTCCTCCTCGATAATAG  
CGTTGAACTCGTCCACGGAATCTATCCGCGCAACGGGGAGAGGATATCGCCGAACAG  
GCAGAGCCGACATCACAGGAGTCAACAGGGATTAAGAAGATCGCCCCGGATCGTCGGA  
ATCCGGCAAGTTGTCTGTTCAACTCGCCGTCTCTCCTCCTCGTCGTCGAGCAGCACG  
GACAGACAGGGCAGATCGCCGACACCGAACCCTTTCAGGCGCAGCAACGCTTCCAGG  
CAGCATCAGAGCGCGAGAACCACGCAAGCCTCTCCGGATTCTCATCAGTCGCGGGTGA  
GAAGGTCCAGAAGTCTTCAATTACCGGAGAAAAGGTCCCCGAGCGGCGCAGCGCCAT  
TGAATAGGGAACACTCGAGGGAATCCAACGAGCCCCATAGATTGGTTGTGAAAATTTTC  
CAGCGATCGAGGCAACGAGAGAAAACGTCATGCTCTTCAGAACAGAAAAGCGCAGTC  
GACCGAGAACGCGTTAAACGAGGAGTTGCTTCGTGAGACCGAGGCTGTAACCGAGTT  
CCTTTACGGTACGAGGAGCCGCGGATAGCCAGAAGCCTGCTGTGTCGTGCCGGTTCGAG  
CGTCGCGAGGATGGCCAGGAGCAAAGGCAAAGGAGTAATCCCAACACTTACGATGTTT  
ACTTTATCTCCTCTAAACACCAGCAATCTTCCAAACCTTCCACCGGTTTCGTCCATGCAA  
CAACAGTCGCAGCAGCAGCAGCAGCAGCAACGCAACAACAACAACAACAACA  
ACAGCAGCAGCAGCAGCAGCAGCAGCAACAGTCGAGGCGACCTAAAACGCTTCAAA  
GGGGAGCAACGACCCCGAATGCGAATCCCGCGAACCACGACTTCTGCATCAGTCCCG  
ACACGAAGCTGCGCTGCAACAGCAGCACCTGCGATTCTGGCCGCATTGCTCGCAGAG  
AGAACTCTTTACTCGCCCAACCAAGCTCCGGTATTTATGAAATTATCCAGAGCTACC  
CGGCTCATCAGAGGCTGGCCACGGACGCTGGAGGCAGCCACGCGAGCAGAGGCAGC  
GCCAGCTCGTCCCCGGCATCGTTGGAGCGAATGGACGATCGTGAGTTTCGCGATCGTG  
ACGCGTCCCGAAAGAATCGGGCAGCTCGTGATCGGAGCAACAGCAGCGCGGCCAAAT



ATCAGGAGAGGCAGCCGAAGAGCGTGTTGAAGCAGTCGAGCCGATGGTCGTCCCTGG  
AAGGATCGAACGGCGGGGGGAACGGTTCGAGCGTGGATAAGAGGGAATATCATAGGTA  
TTATCAGAAAGCTGAATTCAGTTCGGCCAGTTTTGAGGGGAGTTGTGAGAACAAGGAT  
AGAAAGGTGTCCCCGGTTCAAGGGAAGAGCGTAGCGAGTAGATCGCCGAGCGGCCAC  
GCAGCATCCTCTTCCACCACCTCGTCATCCTCCAGTAGCGACATTTGGGTGACCACGTC  
CGATCGAACCGTGACCAAGAGTCCGAGGAATGCGAAGAGCTCGGGCGCATCAACTCC  
CATGGAGGATGCGGTGATTGGCTCTCTGAAGACGTTGATGGAGCCGCCGAAAGATGGA  
ATGCTGTCCAGGCCTGGAAGCGCTCCAACGAGGGGCGAGGATACTCTGTCCGCGGAC  
GGATCCTTGGATCCTCATCAGCGGTCACTATCGTTGCCTAAGTCCTTCTTGACGCACAA  
TGG

>novel\_circ\_001674

GTGCTGGAGGAATCGGATACGTCGTCGGAAATAAGTTGCAGGAAGGATGCTTTGAATC  
TCGAGAATGGCGACTTCAAACGTCCATCGAGAAGGCGATCACGAAACTTCCCAGGAT  
ACAACACTTGTGTACGAAGCGGAGAAACCACCGCCCCCTTCGTCTCAAGAATCCAG  
ATGGGAGTTTCTAGAGATAAGCTTAGGTTACAGACGGTCCTCGGCCAAGGAACTTC  
GGCCAGGTCTGGAAGGCTGAAGCCGATGATTGACAGGTCATCAAGGGACGACCCGT  
TTAGTGGCCGTGAAAACGGTGAAAGAGGGTGCTTCCGACCGTGAGAAGGAGGATCTG  
GTTTCGAGAACTGGAAATCATGCAGCAGCTTGGCAGCCATCCGAACGTTGTCACTCTTC  
TGGGTTGCTGTACGGAACAAG

>novel\_circ\_001677

GTAAACGAACACCGTGGTCGCTAGAAGACACGAAATGAATCCAATAGAAATTAAATCT  
ATCCGTAGTCGACTTGAAAACTTGAAAACTTTGGAACCACGTGAACGTATATCATAT  
TTATTGTAACTTTCTCAAGTTCTATTTCTCCATCTTCGAGGGATCGATATTCATTGTTCCG  
TAACTTGTACAGCCGTAAACGAAACAAAAGAAACAGGAAAAGGAAGAAATATATATAT  
ATATATAAATATACATATAGATCTATATCCTAAAAAAAAAAAAAAAAAAAAAAGGATAAA  
GAAGATTGAAGCAAAGCCAAAGATAAAAACCGAAGAGAAGGAAAAAAGAGAGGAAA  
AGAATTCTAAACAATAGAAAGATTTTTTTTTTTAAAAAAGCAACGTCATTAGGGATTGT  
CCAGGGGAAAAAAGGAGGGAATAATTGATTAGGATTATTTGTTCAATTGAAACGGT  
GGCAAAAACGTCAGTGAGAAAAAGCGTCAAAATGAGCACAATAAGCGACAACCAATG  
TACGTCAGTGAGAGATTTCTACAAGGACAGATCTATCTTCATCACCGGTGGTACCGGAT  
TTATGGGCAAAGTTCTCGTTGAGAAATTACTCAGATCTTGTCCCGGAATAAAGAACATT  
TATATTCTGATGAGACCTAAGAAGAGTCAGGATATTCAACAGAGGTTGCAGAAATTGTT  
AGATGTGCCGCTGTTTCGATAAATTGCGTCGGGACACTCCTGATGAACTTTGAAGATAA  
TCCCTATAGCTGGAGACGTGACGGAGCATGAATTGGGCATCTCAGAAGCTGATCAAAA  
TGTTATAATAAGAGACGTGTCGATCGTTTTTTCATTCTGCTGCCACTGTGAAATTCGACG  
AACCGTTGAAGCGTTTCGGTTCACATCAATATGATCGGCACTAAACAACGTGTTAACTTG  
TGCCATCGTATGCACAATTTAGAG

>novel\_circ\_001678

CTGTTGATAAATTGCGTCGGGACACTCCTGATGAACTTTTGAAGATAATCCCTATAGCT  
GGAGACGTGACGGAGCATGAATTGGGCATCTCAGAAGCTGATCAAAATGTTATAATAA  
GAGACGTGTCGATCGTTTTTTCATTCTGCTGCCACTGTGAAATTCGACGAACCGTTGAA

GCGTTCGGTTCACATCAATATGATCGGCACTAAACAACCTGTTAAACTTGTGCCATCGTA  
TGCACAATTTAGAGGCTCTGATTCATGTTTCAACGGCATATTGTAATTGTGACCGCTACG  
ATGTCGCTGAGGAGATTTATCCTGTGTGCGGCGGAACCAGAAGAAATAATGGCTTTAAC  
GAAATTAATGGATAGCCAGATGATTGATAATATAACACCGACTTTGATCGGTAATCGGCC  
GAATACATATACGTTTACCAAAGCTCTGACTGAAAGGATGTTGCAATCCGAATGTGGCC  
ACTTGCCGATTGCAATTGTAAGACCCTCTATCGTTCTTTCCCTCGTTTAGAGAACCAGTAT  
CTGGATGGGTGGACAATTTAAATGGACCAACTGGAATTGTTGCCGCTGCTGGCAAAGG  
TTTCTTCAG

>novel\_circ\_001679

GGATCGTTTCCATGCAAGAAAGATGGCTTCCTCACTCTTGGCCACGAATTCGCAGGCA  
CGGTAGACGCGATTGGCTCCTCGGTGAAGAACTTCAAAGTCGGGCAAAGAGTGGCTG  
TCGATCCTAACAGTGGATGTAATACGTGCAACTACTGTCACGATGGTTCTTATCAGCAC  
TG TAGCGCCGGTGGTATAAACAGCACGATAGGGATTTATAAAGACGGTGGATTTTCCAC  
TCACGCTATCGTACCCGAAAGTCAGGTGTATTTAATACCAGACGACGTCGAATTGCATC  
AAGCCGTCCTCGTCGAGCCTCTGTCGTGTTGGCTCACGGATGGAAGAACTTAATAG  
CGTCAACGTTGGTAGCAACGTGCTCGTAATTGGCGCCGGAATCATTGGTCTTTTGTGGG  
CTTGATGTTACATTTGCACGGGCTTAGGAAATCCGTGACGATCAGCGAGCCTCAGGAA  
AAACGGCGGAAACTGGTGACGAAACTTG

>novel\_circ\_001680

AGAACATATGGAAAATGGTGGGATAAAGCACCTTCAAGATTAATAGATTATATGCCACA  
GAACAATATAAATATTACTAGCCAGGATTATATAGATATTTTTAACTTATTGGAATATTATA  
CTGATACCATTAATACTTATGATATATGAAAAATGGAAATAAATTAGAATATTTTTTATATT  
ATCAAGATCTAGAATATTATCAAGAGGTATATCCAATTAGAGTATCAATATATGAAACTTA  
CAATCCTGGAAGTGTAAATTGGGATTTGGGCACAAAATTCCGAAGGCAAGTGGTATCAA  
TTATGGAATGGATTTCTCAAGTTGTGCCACACAAGCCGCGAATATTTTCTCCATATTTG  
CAGCTATGTAATTTTAAGACAAAAGTAATAAGACTAGAATTTAATCATACTTTATTAGAC  
TATTATACAGAATTAGATGCTGTATTACTTATTGGTACATCAGAATTAATTGTACCTAATA  
ACTTGCACAATCAAATTTAAATGATCTTTCACAAGAATTGGGGTATCTTAAACAAAGT  
GATGATGATATTTATAATTTAACACCTGATTATTTAAAAGCAAATCAAGATTTAATAATTC  
TTAAAAAAACACTTTCTAAACACTGTAACTTTTTTAAAAGTAAAGTAATAGATAATGTA  
TCCAAGGGTAAATTAATATCTAAAATAGGTCAACATTATCAATCTGTTCCCTCCTATAGAA  
GAAGCATTCAACAGTTTACAACAATTTTTACAAGAAGATTTTCCAAAACCTTATTAGAGA  
TATTCATCATTCAATACCAAATACTACTGAACAAAATAATTCTCTCCAGAAAAAATTTTT  
AGTATCTTCAACTGATTTTGAAAATCAATCATATTGCAATTTTCAATACTTCCGGATGA  
AACTGTATTAAAAATTTTAAAAAATCTAGATTTAAGATCATTATGTTGTTTATGCAGAGT  
AAATAAACATTTTAATAACATTGCAAGAGATGCTTTGTTGTATACAAGTCTTAATTTAAA  
ACCTTACTGGTATTGTTTAGATACAGCTGCATTAAATAGTTTAGCACCTAGGTGTCATTA  
TTTGCAACAATTAGATCTTTCATGGTGTGGAAATTATAATATGATTAAAGTATCAAGATTTT  
ATATATTTTCTTCGTATATCTGGAAGTGTGTTTGACACATTTAAGACTAAATTGTTGTCAAT  
TTGTAAATGATCCTATTATTCTTGAAATTTCGAAAATATGTAAGAATTTAAAAG

>novel\_circ\_001681

CAAAAAATAAAAATGAGAAGAAAAAACAGTATGTGTTTTACCAGCAAGATTAAAAG  
GGAGACAAACTAAACATAGCAAATTTGTCAGAGACTTAATTCGTGAAGTAACTGGTCA  
TGCACCATATGAAAAGCGTGCTATGGAATTATTAAGTTTCCAAAGATAAACGTGCAT  
TGAAATTTTTAAAAAGAAGGTTGGGTACACATATCAGAGCTAAAAGGAAGCGTGAAGA  
ACTTGGAATATTCTTGTCCAAATGAGGAAAGCTGCTGCACATCATTAAATAATATATTA  
TTAAATTTTTATAATAAGTGTATAATAAAAACTATACATAAAAAAAAATTTTTTTACTTT  
ACA

>novel\_circ\_001682

TATCCTCGAGCTGCGCAAGGAGAAGAGCAGGGACGCTGCCAGGTCTCGAAGGGGGAA  
AGAGAACTTCGAGTTCTACGAGTTAGCGAAAATGTTGCCATTACCGGCGGCTATTACCT  
CCCAGTTGGACAAAGCCTCTATAATAAGGCTAACCATCTCGTACCTCAAACCTTCGGGAG  
TTCTCGGGCCACGGAGACCCGCCATGGAATCGGGATGGGCCACCGCCAAATAAATCTG  
GCAAAGGTGCGAATCGAGTTAGGTCATCGGCATCCGCTGCTATGGACCATTTGATGTA  
CATCAGGGTACCCATATTCTTCAGTCGCTGGACGGGTTCGCGATGGCGGTGCGCGCTGA  
TGGACGGTTCCTGTACATATCCGAGACCGTCTCAATTTACCTTGGACTCTCACAG

>novel\_circ\_001684

GCGGGTTCCTGGGCGACATCGCTCTGCCCAACATCAAATACGAGACCGAATGGAGGCA  
GCAGAAGCTCAACAAGAGTTTCTTGAGGAGCTGGAGAAATATCGGGACGAGGTGTT  
GAAAGAGGGTCTCCAGGTCGAGGAGGAGGGTCTTACAGAGATTCTCCAATTCAAAAA  
TGGGCACGAGGCTAACGAGCCGCATCAGGAGAACGAGGAGATGGTGGCTTCTCAAGA  
GAAATCCGAACCAATTATGGTGGACCGGAATCAATACAGCATGGACGGCGAGCTCGAG  
GGTGGATTCAGTTTTAACGCTAGGAACGAGGATGCCAGGCCTGGGGTGAGGGACGAA  
GGCGTTGAATTCAGGCTAGAGTCAACGACCCACCAACGAAGAAGAGGCATTCCGCT  
CGAAAACAAGGACGTGAAGCCTCGCAAACGGCGTGAACGCTACAAAATCGATGCAA  
GCATTTTTGAGAACGTCTGAAGAGTTGAACGTCGCGTTTCCACGAGCACGGAGGGC  
ACCAATCAAATGAGAAATTTGAACGCGGAAAACATCGAGCAAGTGTTACCATCCAAC  
CGGAAAGCAGCACGCGGAACACGTCCAAGCAACGTCATCGTCGTCATCATCGTAGGA  
G

>novel\_circ\_001685

GCGGGTTCCTGGGCGACATCGCTCTGCCCAACATCAAATACGAGACCGAATGGAGGCA  
GCAGAAGCTCAACAAGAGTTTCTTGAGGAGCTGGAGAAATATCGGGACGAGGTGTT  
GAAAGAGGGTCTCCAGGTCGAGGAGGAGGGTCTTACAGAGATTCTCCAATTCAAAAA  
TGGGCACGAGGCTAACGAGCCGCATCAGGAGAACGAGGAGATGGTGGCTTCTCAAGA  
GAAATCCGAACCAATTATGGTGGACCGGAATCAATACAGCATGGACGGCGAGCTCGAG  
GGTGGATTCAGTTTTAACGCTAGGAACGAGGATGCCAGGCCTGGGGTGAGGGACGAA  
GGCGTTGAATTCAG

>novel\_circ\_001686

GATATCCCGGCTGTCCAGGTTTTCTAGTGTTCCCGGTTGGCCAGGATATCCAGGTTGT  
GATGTTCCAGGTATACTAGATATTCCAGGTGTTTCTGGGGTTCCAG

>novel\_circ\_001687

GAAAATTTGCTGACTGATGGTGAGGGTAGCACAGGAGAAGTTGATGATCAGGAAGTC  
ACAGATGAATGTGCTATGTTAATTCACACAGATCATATGCACAAACATACACATGTCAA  
GAGTGGACAAGATAAAAGTACAGGTATTTGTGGTGATGGTTTGACGGTTCCTGTAAGT  
TCTCCTCGGGGAAAAGACACAACCCCCATAGCAACACCGGTTCCAGGCCCGGATTTCAT  
TAACTTCCCCCTCTCCACCAGTAGTTCATGTAAAGAAAGGAAAATCATTACAACCCACG  
CAAATGCCTGCTAGTACACGAGCAAGTATTGTTTTTCCATTGCTTGCAAGTGGTGGGTT  
ATTCAATCAAACCTCGGGAACCAAATAACATAA

>novel\_circ\_001688

GTATTTTCATACTGATGATTTTGGGATGCCTCGGTCTTGCAACCGGTTGCATTCTCTTCG  
TGTTTCAACCGTACGAGTTACTTTTTAAACTGAAAATAATCTTCAGCCCCAACAGCGAG  
ATATTCGAGTTATGGCGGAAACCGGATGTTGAACTTTATCTCAAGGTCTACCTTTTCAA  
CGTGACCAATCACGAAGAATTTTTGTCCGGCAAGGAGAGCAAGTTAAAATTCCAAGAA  
GTTGGTCTTACGTTTACAAAGAATCATTGCAACATGCGAATGTTCTATTCAATGATAAC  
AGCACGGTGACGGCGCGGCTGCTTCATCCATTGGAATACGTACCGAAAATGAGCAACG  
GCACGGAAGAGGACGAAATGATATTACCAAACATCGCGTTATTC

>novel\_circ\_001689

CATCGAAATCGAACCTGGTCGTGGACATCGAGCCGAAACGACCGACTGCCGTCCGATT  
GGGCGAGAGCCTGCAAATTTTGTGCAGAGTTGGTAGACCGCTTCGGGTGTGCCGTGTC  
GAGATACCTGGCGAGGAAGGTGGTATAGTTCTGTCTGAAGGGGCAACCGCCCCGAAGAC  
GGCATCGAGTATTACGGGGAGGGAACGGAGGCGGGCCAGTGCGGTGTCCGCATAGCC  
AAGATCAAGGAAAGCCACGATGGAATATTCAAATGCACCCTGACCACGACCGACAGCC  
GATCGGAGGAGCAGGCATCCATGAGGATCATCGTTGCCAAACCGCCGAATAATCCAGA  
GCTTCACACTAGTCAAGGATCGGATGGAAGGAATATATACAGGAAGGGAGAAAAATTG  
GAAGTGAGTTGCAGCGCGCCAGGCGGGCGTCCAGCGGCCAACGTTTCTTTGTTCTCTCG  
ACGACGAGCCAATCGGTAACGAGGAAAGGCCAACGATTTACGACTCGAACGTGGACG  
ACAATTCACTGGCCGTGCAAAATGCATCGCGCGCCTTGGACTGGACCGACAACGGGA  
AAGTTCTTCGATGCGTGGCCGGTCACATCGCCCTCGACCGGCCTAAAGAAACCACTAT  
GCAACTGCAGGTCTACTATCCTCCTCAACCTCAGTCAACGATCGAACGATTTGGATACG  
TAATTGGACGGCAGGGAATCGTGAACGTGACCGTTTACGCAAATCCTAGGCCGCGTTT  
TTTATGGCGTGTGAACAATGAGATAATCAACGAGGGACGTCCAGACGAGAGCAATCGG  
CTCGAAACCTCGACCGCCGTGGATCTG

>novel\_circ\_001690

AACCGCCGAATAATCCAGAGCTTCACACTAGTCAAGGATCGGATGGAAGGAATATATAC  
AGGAAGGGAGAAAAATTGGAAGTGAGTTGCAGCGCGCCAGGCGGGCGTCCAGCGGC  
CAACGTTTCTTTGTTCTCGACGACGAGCCAATCGGTAACGAGGAAAGGCCAACGATT  
TACGACTCGAACGTGGACGACAATTCACTGGCCGTGCAAAATGCATCGCGCGCCTTGG  
ACTGGACCGACAACGGGAAAGTTCTTCGATGCGTGGCCGGTCACATCGCCCTCGACCG  
GCCTAAAGAAACCACTATGCAACTGCAGGTCTACT

>novel\_circ\_001691

TGTCGCCTCCTTTGCCGCCTGTGGTCGAAACAGCGTGGGACAGAAACCGGGAACGTG  
AACGAGAGAGGGTGCGAGAGAGGAGCACGGAGAACGAGCACAGGGACAGGCAGCT  
AGACAGAGAATCGGGGATAAGGGAGACGAGGGATCGGGAGAAGGAGCGGGATCGCG  
ACAGGGAGAGGGCAAAGGGACAGGGATAGGGAGCGGGACGTGTCGGTCCGCATGATG  
GAACCGCTCGATCCCGTCTTCGTCTCCCCCTCGGCGGCCCTCCTCGCGTTGCAGAGGAT  
AAAGGAAACGTCCCTGGTGTTCACAAGCGTCCAGCGCTGGCGAGCGGAATAGGGAT  
CGGCGGAAGGGTGAACGCCGGTGTTCGGAGGGAACGGCGGCAGCCTCGCGATGGACA  
ACGAATGCGGCGACGCGTTGAAGAGGCGCAAAGTTCACAGATGCGACGTGGCCGGTT  
GCGACAAGGTGTACACCAAGAGCTCCACCTCAAGGCTCACAAGAGGACCCACACCG

>novel\_circ\_001692

GCGGCGGGACCGCCGGTGCAGCTGGAACCAGTGGATCTGTCCGTGAAAACCTCCCGTG  
GTGTTGCAGGTGCCCCGGTACAGTCCAGCGGCTATAATTACCGCCACGGCTAGAAGAA  
TCCCTTCACCTTCCACGACGCCTACGCCACCGCCGCTCTCCGCATCTACCG

>novel\_circ\_001693

GTGACGTACCCGAACGGGCCAGTATTCATGCCAGTATGCCAATCAGATGCCAGTAGA  
GAGCCAGTATCTGTATCTCGTCGCCACCGATAGCCAATTAATAAGTTACTTAGATAGTTA  
AATTAATAGGCAATACAAAAGGGAAAAAAAAAAAAAAAAAGAAAAAGGAAAAAAAAAA  
CGTCAACGTTTTTTTTGAATAATTGTCGTTTCAAGGCGTCGTTCAATAAGCGTGACGG  
ATATATATATATATATATATATATATATATATATATTACGTGTATTCAATCATACAGTAGTC  
TACGTATATCGATATATATAAATATAATTAAACGTAAAAAAATATATATATATACAATATAT  
AATATATATATATAATACAATCGAGAGAAGCGATAAGTGTTCGGGAATCGTGCGAGCAATT  
ATTTTTCGCATCGTACTTTTTTCTCTCTCTCTCCTCCCCCTCCCATCCTCTCCCCTCTCTTC  
TTCGACCATATTTTTCTCCGCTCGGTTGATCGGTTTTCTTTCTTTCTTTCTTTTTTTTTT  
TTTTTTGAATTTATATCGGTGACCGCGTATATGATTCCCCGCGGAGAGTATATCGACAAG  
ATTGGACAGAGAGTGAATCGAGTTGTGATTATCGAAGTGGACCGACCGATCGATTTC  
TCGGCTGTGAAGTGAATTAATATCCAGGAAAAAGGATTGAAAACGGAGAAAGGAAG  
TGAGTACAAGCAGCGAGTACACGGGCGAGCAACGGGTGGCTGGAAACGGTGAATTAC  
ATCGAGAGCGCCAACCTGCAATCAAGGTTTCATGGTTTTTCATG

>novel\_circ\_001694

GATGATGTGCAACAACGTGTATGATTTCGACCGGGTGGATAGAGAGGCCTGTGCAAAGT  
CAACGCGATACTGGAATCGCTTGGAACGACGGTCTGCGAACGGGCTAGGTCCTTGTCT  
CTCTGATACTCGCTTATACATCCGCCAGCTTCTAAATTTGCAGCCGAGGTAGGGGTGGA  
ACCGCAACCGCAACACATCACCGAGCATGCTATCGTTTTCCACTGAAAACGATGCGAT  
TTATGGCGTGATTCTCGATTATGTAAGAACAATTATCACTTATCCCTAACTCATTCTTTTT  
TTAGGGATTTTATTAACATAAAATTGATAGAATTTAAACAGCGATAACGAATCATCACTC  
TGATTATAATAATTGTAACATTTTTATCAATTCGCAATAACAATCAAATTCTATCAATTTT  
ATGAATCGAATATTCGATAAAGTAAGATAAGAGTAATGATATTCTATTTGGTTTTTTCAA  
AGAATTATATAGGAATTCAATACGTTCCAGTTCTTCCTACAATAAAGTACGTACCTTAGG  
ATCGACGCTTCTTTTTATAGCATTGATAAGATCAGCTCTTAAGCTCTCCATCTGTCTAAG  
TCCTATCCTAGGTACAACGTCTTTTCCAATACTACGGATGTAATAAATTCCTGCGAGTA  
TTGCTGAGCGGGCATGCTCAAGAGACCACCGGTGGAGCGAACGAGAAGCACACCAG

GTCAGGATAATCTTGCTTAAGCAAAATCGCCAAGATAGCTGCCGTACCAGCTCCCAAA  
GAATGACCAACAAGTGCCAGACCGAATTGATGGGTTCCTCGATGTATCCTGTATACA

>novel\_circ\_001695

ACACAAAAGACAAAATATGTGGATCCAAATGTAGAAGTGTACAAGATGAATCACAAA  
CGAAGAGGCACAGCGTTAATTTTCAATAACGTAAAGATATATCAAGAAAGAAATAATAC  
GGAGGCATGTGCGAGGAATCTGTGCGAAACGTTTCAGATGATGGGCTTTGACGTGGAA  
CTCATCGTCGACGCAACCTTGCAAGTGATAATAGAAAAATTGAAGAGTGTGCTTCAC  
AGGATCATACGAATAACGACTGCCTGGCCGTGGCCGTTTTGTCTACCGGGACGTCCGG  
TTATCTGAAAGCAGACAACATGTTTTATCCAGCCCAAATGCTCTGGATGCCTTTCCTGC  
CCGATTCGTGTCCAGGCTTGATCGACAAGCCAAAGATATTCTTCCTCCAGACTTACCAT  
GATTCATCGTACAACGGAATACACGGTTTTTGACCAATCGATCAATTTCTCTTCCCAGAT  
ATTATGGTCGTACACTTATTTTATAATT

>novel\_circ\_001696

TTGCTTCACAGGATCATACGAATAACGACTGCCTGGCCGTGGCCGTTTTGTCTACCGGG  
ACGTCGGGTTATCTGAAAGCAGACAACATGTTTTATCCAGCCCAAATGCTCTGGATGCC  
TTTCCTGCCCCGATTTCGTGTCCAGGCTTGATCGACAAGCCAAAGATATTCTTCCTCCAGA  
CTTACCATGATTCATCGTACAACGGAATACACGGTTTTTGACCAATCGATCAATTTCTCTT  
TCCCAGATATTATGGTCGTACACTTATTTTATAATT

>novel\_circ\_001697

TACTTCATCTCAAAGGTAATCGTGAACAACCTTCCCAGCTCAGGCCAGAATAGAAGATA  
TCGAAGCTTTATTTTCGAACTGTGGACAAGTGCAGTCCGTTGAAAAGTTATCCTCCCGA  
GACCCGAACACTCAAACCGTCCTAATCAGTTATGAGACGCAGGAACAAGCACAAACAG  
GCTGTGAACCAATTTAATGGCCACGAATACGAAGGTAGCCCACTAAAAGTGGAATGT  
CTACGGTGGAGAACCGACGAAGAGGCCGAGCCAGCGAAGCGGCGTAGCTTATTCCG  
GAGTTTCGGGTTCTGGGCGGCAAGCAGACTTCCCCTTCGTATTCTCGTCCAGTCCGA  
AATGGTAGGAGCCATAATTGGTCGTCAAGGATCAACCATACGTCAGATCACCCAGATGA  
CGCGCGCGCGAGTGGATGTTTCATCGAAAGGACAGTCTCGGCGCGGCGGAGAAAGCCA  
TCACTATCTACGGCAATCCAGAGAATTGCACGAACGCCTGCAAGAAAATCATGGAAGT  
CACGCAGCAAGAGGCTTACGGTTTTGAGCAAAGGTGAGATATCATTAAGGATCCTCGCG  
CACAACAATTTGATCGGGCGAATCATCGGAAAGGGTGGCACCACCATCAAAAAGATCA  
TGCAAGACACCGACACCAAGATAACCGTAAGCAGTATCAACGACATCAACAATTTCAA  
TCTCGAACGCATCATCACGGTCAAAGGCAGTATCGATAACATGAGCAAAGCCGAATCA  
ATGATCTCCAACAAACTGCGTCAAAGTTACGAGAACGACTTGCAGGCAATGGCTCCCC  
AGAGTTTGATGTTCCCGGGACTCCATCCTATGGCGATGATGTCCACTGCTGGCATGGGA  
TACAGTTCACGTGGTCCCGTTTTGTACGGTTCTGGCCAGCTCCCTATCCGTATCAGGC  
TAGTTTGCCGACTCAACAGGGTATTCCGATAGGCGATACCCAAGAGACTGCTTTCCTTT  
ATATTCCAAATACAAGCGTAGGTGCCATCATAGGAAGCAAGGGTTCTCATATCAGAAAC  
ATTATCAGATTCTCCGGCGCCAGTGTGAAAATCGCGCCTATCGAGCAGGATAAACCTGT  
GGATCAACAAAATGACAGGAAAGTAACCATCGTCGGGTCTCCCGAATCTCAGTGGAAG

>novel\_circ\_001698

AGGATAAGGAGAGTGGCGTAGATTACGGTCGTAAGCTGGATTAAGGGCACGGACGTCA  
TGGAGCGGTACGAGGAGGAAGGCGAGGACAGCGACAACGAGACAGACCCGGAACAA  
CTGTTGAACGAATGGCTCGGCGAGTTGGACAGCCTGACCGTGGTGTGCCTCCTACGTT  
CTGTTGTGCAACGCAGAGGAAGTGGAAACGAGCCGTCTACCGAAAGAAGAAGGAACTT  
TGAAC TTGAAAAAAAAAAAAAAAAATTGATCATTTCAAACGAAATTACGTTTTTTGGTAAG  
ATAAACGTATTAAATATCATCGAATAAAGAATCGTTTAACGTTGTGCGAAAATGTATTCA  
TCGAAAAAAAAAGAAGAAGAGAAAGAAATTGTAAAAGAAGCAATATTTACGTGTTTACA  
AAAGACGAAAAAGAGATGGTTGGTTTGGAAATACAAGATTGGGATCCACGGTATGGG  
AGAGGAACGAAAAGGAGAGGATTTTGAGAAACACTGCGTATCTGTGCCGAGCGCCAC  
GCGACCAGGTTCGTCCGGTTCGGGCTGGGTGCCGGGTGTTGTTGAAATCAACGTGGTGG  
GGTTCCTTCGACGACCACAACCGGAGCCTTATGCCTTCAGTCGACTCTCGGCTCTCACT  
GCGACTCGAGCTGCCTGAGATTTCCTGTTAATTAACCAACTACCGATCCGCGACAGCGG  
CTGGCCAACCACATCGCAGCCGCTCCAGATACGAATTCACCTTTCCTCTCGCCGGAATC  
CGGAGTTGTCGTCCGCCAAAAAAGAAAAGAAAAGAAAAGAGAACATCTCGAGAAGAA  
GAGGCGAAGTCTGTTCAATCCCAATCCATTCCAATTGCGCGACGTCTCGTCCCGGAGG  
ATGAATCGATCGAAGTCGGGCGAGGATCGACGAGGCCTACCGTTTTAAAGCGCGAGT  
GAGCGAGCGAGCGAGCGACTGTGAGGAACGATCGGCCGATCCCGGAGATCCGATCCG  
ACCAGTTCTTTTTACCGGTTCGATCACCTCGATCCCGCGTCACAATCGCTCGTGGAGCGG  
GACGTGCACGTTCGCGTACGCGTCGTTGGCTGTTAATTAGTACGTGGGTGCCGTGATAGA  
GTGGGAAGAGACGAAAGAGGGAGAGGGAGAGAGAGAGGAGAGAGAAGAGTGAGTGG  
ATGCGAAGAGATGCCGAAAGCGGAGGGAGGACGATTGAGAGGAGCGGAGGAAGAGA  
GGATCGAGAAGTAAAAGAGGCGAGAAAGAGGGTTGGAGGTTAAAGCCGGAGTTAAAT  
AGATGCAGGAATCTGTACGCGGCGGCGCCATGCTGGTGTAGCGAGCGAGAAAAAATAT  
TCGGTTTTCCCGGTGTGTATCTCCTCTCCGTGTGAACGTGGCCGTGCGGATGGAACGTAG  
GAATCCCAGGAGCGTAACAGTGAACGCGTTTCGCGGCCGTTGAAGGGAGCGTGAATT  
CGTTCAGGAGGACCAGTTCGCCGCTGCACAGGCGTTAAGAACCCGTTGAGACGTTGA  
GAGGAGGAAAAGAGGTGAACGTTTCGGGAGAATTGTCTCGAGAGGAGATAACAGTG  
GACGATTCTTCTCGGTGAAAACGAATTTTATTATAACGAGTTGGAAAAGGATCGATGA  
TCCTCGATCAGTGATTATTTAACTTAATTTTTCTTTCTTTCTTTCTTCTCTCTCTCT  
CTCTCTCTCTCTTTCTTCTCGTGTGTACGAACGAGTATAAAGGAATATACGCGAACG  
CGCGAGGAACATGTTGTGCGGCACGTTTCAGGAAGAAGAGAAGGCATCCAGGGGATGA  
GTATCGATTGGTGAGATCGAACACGATGCCTAGAATCCTGTGCGCGAAGGAAGGTAGC  
CTGGTCACGGTCCGGAGAACAAAGTCCTCGAGGGTGGCGGCTCGTTCCCCTCATCTCA  
GGGATCTTCTGCACATG

>novel\_circ\_001699

AGGATAAGGAGAGTGGCGTAGATTACGGTCGTAAGCTGGATTAAGGGCACGGACGTCA  
TGGAGCGGTACGAGGAGGAAGGCGAGGACAGCGACAACGAGACAGACCCGGAACAA  
CTGTTGAACGAATGGCTCGGCGAGTTGGACAGCCTGACCGTGGTGTGCCTCCTACGTT  
CTGTTGTGCAACGCAGAGGAAGTGGAAACGAGCCGTCTACCGAAAGAAGAAGGAACTT  
TGAAC TTGAAAAAAAAAAAAAAAAATTGATCATTTCAAACGAAATTACGTTTTTTGGTAAG  
ATAAACGTATTAAATATCATCGAATAAAGAATCGTTTAACGTTGTGCGAAAATGTATTCA  
TCGAAAAAAAAAGAAGAAGAGAAAGAAATTGTAAAAGAAGCAATATTTACGTGTTTACA  
AAAGACGAAAAAGAGATGGTTGGTTTGGAAATACAAGATTGGGATCCACGGTATGGG

AGAGGAACGAAAAGGAGAGGATTTTGAGAAACACTGCGTATCTGTGCCGAGCGCCAC  
GCGACCAGGTCGTCCGGTCGGGCTGGGTGCCGGGTGTTGTTGAAATCAACGTGGTGG  
GGTTCCTTCGACGACCACAACCGGAGCCTTATGCCTTCAGTCGACTCTCGGCTCTCACT  
GCGACTCGAGCTGCCTGAGATTTCCGTTAATTAACCAACTACCGATCCGCGACAGCGG  
CTGGCCAACCACATCGCAGCCGCTCCAGATACGAATTCACCTTTCCTCTCGCCGGAATC  
CGGAGTTGTCGTCCGCCAAAAAAGAAAAGAAAAGAAAAGAGAACATCTCGAGAAGAA  
GAGGCGAAGTCTGTTCAATCCCAATCCATTCCAATTGCGCGACGTCTCGTCCCGGAGG  
ATGAATCGATCGAAGTCGGGCGAGGATCGACGAGGCCTACCGTTTTAAAGCGCGAGT  
GAGCGAGCGAGCGAGCGACTGTGAGGAACGATCGGCCGATCCCGGAGATCCGATCCG  
ACCAGTTCCTTTTACCGGTTCGATCACCTCGATCCCGCGTCAACAATCGCTCGTGGAGCGG  
GACGTGCACGTGCGGTACGCGTCGTTGGCTGTTAATTAGTACGTGGGTGCCGTGATAGA  
GTGGGAAGAGACGAAAGAGGGAGAGGGAGAGAGAGGGAGAGAGAAGAGTGAGTGG  
ATGCGAAGAGATGCCGAAAGCGGAGGGAGGACGATTGAGAGGAGCGGAGGAAGAGA  
GGATCGAGAAGTAAAGAGGCGAGAAAGAGGGTTGGAGGTTAAAGCCGGAGTTAAAT  
AGATGCAGGAATCTGTACGCGGCGGCCATGCTGGTGTAGCGAGCGAGAAAAAATAT  
TCGGTTTCCCGGTGTGTATCTCCTCTCCGTGTGAACGTGGCCGTGCGGATGGAACGTAG  
GAATCCCAGGAGCGTAACAGTGAACGCGTTTCGCGGCCGTTGAAGGGAGCGTGAATT  
CGTTCAGGAGGACCAGTTCGCCGCTGCACAGGCGTTAAGAACCCGTTGAGACGTTGA  
GAGGAGGAAAAGAGGTGAACGTTTCGGGAGAATTGTCTCGAGAGGAGATAACAGTG  
GACGATTCTTCTCGGTGAAAACGAATTTTATTATAACGAGTTGGAAAAGGATCGATGA  
TCCTCGATCAGTGATTATTTAACTTAATTTTCTTTTCTTTCTTTCTTCTCTCTCTCT  
CTCTCTCTCTCTTTCTTCTCGTGTGTACGAACGAGTATAAAGGAATATACGCGAACG  
CGCGAGGAACATGTTGTGCGGCACGTTTCAGGAAGAAGAGAAGGCATCCAGGGGATGA  
GTATCGATTGGTGAGATCGAACACGATGCCTAGAATCCTGTGCGCGAAGGAAGGTAGC  
CTGGTCACGGTCCGGAGAACAAAGTCCTCGAGGGTGGCGGCTCGTTCCCCTCATCTCA  
GGGATCTTCTGCACATGGTAAGCCATAAACGCGATCTCGCGCGCCGGTGATTCCACGGT  
ATATTTCTATCCTCGCGATAAATATCGCGATATCGGCCAAGGACTCTCGAGAAAAGAA  
ATATGGCCGATTACCGTTTCGTTGTCCTTTCGAGAGATCGGCCGGTGAAACAAAGAGA  
AAACGTTTTTTCGATTTTATCTTTTTTTCCTTATCGTTCTTTCTTTCTTTCTCGATCG  
AGAAAATCGATTTTCGATAATATTACCGAATGTATTTTCGTATTCGGTTCGCGTTTCGAAGC  
AGCTGTTTGAACACGGACAAACGATTTTCGACCATGTAACGCAGCTGCTAGAAGATTAG  
ATCGAGAAATTTAATAAAATCATCTCTCGTCTATCGATAAAGCAACGTCCTCAACGTTTT  
TAAGAATAATTTTTTCAATCGAATTCTGTTGCTCGCGAAAAAGTTTCAGATTCCTCGAT  
TCTCTCGAAGAACTGAGCGAAACGAAAATAATTCGAAGAAAAGGTTCGATCGTGCGG  
CATATTTTGCCCCGTATGGCAACGAAAGGGAGGGGAGGGGGGACTTGAGCCGGCCCC  
AATCGATTCTTCTCGAACGACTCTCCAATCGTCTCTCGAACACGCGAATCCGAATGCT  
TCGTGCCGTTCCCATATATCCGCGTGTGCACGCGATCGCACAGTCCAGCGGGCGTTGCA  
TAATTTACGACACAGCTCGTCGAACGCTCGGAGCGGATTTCGGGTGGCGACCGATCCGA  
TTCGGCTAATCGCGCTATTACCGATAATACCCTCTTGATGCGATATCGATAACCCTCTTCGC  
CTATCTCGTTGTACCTGTTTCGGCGGCGGTTACACGAGACACCTGTTCAATTTAATCGC  
AACGACACGTTCTTCCATTACCTTGGAATCGGGCTGAAAACCTAGTAATTAACCTAATGT  
GAATATATTTGCTCCTCAAAAGAGGAAATTCGAAGATTAACCTCAATCTAGGAGTATATAA  
TGAAAGCGAGTCTGCAAAGGAAGCGAGAAAATGGAGAGGAGGCGTTCGTGCAGAAAT  
TCGGCACGTCTTCCAAGAAGCTCGACGAATTCCTCCCGTTACACGATCACGTTGGGGA



CACGTATCGATCGGTGGATCGAGGGGGGCGGTACGATCATCCTCTTTGTCCTCGCCT  
TTCCGAAACTCCTCCTCGCTCTTTCTTTTACGGTCTAAATCCGGCCACGGAGGCGCCTG  
TGACCGCTCGCAGAAGTCGCCACGAGATACCCACGTGAGAGGGAGAGAGAGAGAGA  
GAGAGCAAAAGGAAGCACGCGAGCCACCTTCTCGAGATGTTGGCCTTATAAGGCCTCC  
TCCGGGTGCTGCTCGGTCTTCCATTAGAAATCCTTTGTCGTCCCGACCTCTTTTTCCGG  
ACGGATTCTCGAGGGCTTTTCGTGCGCCGCGGGGATAGAATCGTCGCGGGCCCAACGGA  
TAGCGAAAGGAGGGGAGATCGTTAGGAGGAACGTTTCGTTTCGTGTCGTGGGACAACA  
CGGTGGAGAAGAGTTTTTAAGATAATGAGAAACCGAGCCTTCCTTCTTCTTTCTTTCT  
TCGTCCGCTCGAGAGAATTACCAGAGAAAGGGATGACGTGCGAAAGGGACGCGATCTG  
GATCGGCCCTTTCTAACGCTGTAAAACCGGGATTCTTGGCCGGACGAGCCTTTTTTACCG  
GAACGAATCTTTGCCCGCGCTCCCGGGGACCGACCACCTCGGCTCCCTTTGTCGAGGA  
CACCCGGTAACTGGTGTAACCCCTTTAGTTAACGGATCCCTCCTTCGCTCGAGCTGTTG  
ATTCCCACTTCTCCTTCCTATTTATATAAAGGAAGAATGACTTTTCCAACTCGCGTAACG  
ATAAGCGATAAAAATCGTGCGTGCAACGAGATCGATCACGTTAGAAGAAACGTTAGAT  
TCTTGGTAAAAACGCGAGAGCGATACAGCGTGAAAATTTGTCGTTCCAGTTGTCCATC  
TCGCGATCGTTTTGCGTTTTACAGCCGCTGGTTTTACCTCGGCTCCTTTGCCTCTCTTCC  
TCCTCGACATGGCCGGTAACGCGCATAAAAACGATCTCGACTCGATTCTATAATTGCC  
GTGGTACTTTTTCAACGTCCTTCGTTGCCGAGTAATCACCACCGCTGGCCTTTCACTATT  
CATTCGTCGGAGCGAGTTTTCAATACCTCGTCCGATCGGGAACGCGCGAGAAGCAGGA  
AATTAGATTCTGAATCCGATGGCGTTGGCGAGCGATCGGGGAGGAGAGGGCGGATTTTT  
TTCCATCCCCTCGAGGGGATGAAACGGGGATGGGAGAAGAGGAGGCGATCTCATCTCG  
GTTGGCAATTTGTGTACCCGGTCAGCCCGGTCCGTTCCCTTTTGCGCGCTTTTGTTCCC  
TCTCCCCTCCTCTTTTTGCTCGTCCCATCTTCCATCCCTCTCCTTCTTCTTCTTCTT  
CTTCGGCTTGGTCTTCTCTCGTTGGAATTCCAATTCTCCCTCCCCCACTCCAGGACTCG  
CGAAATATCTCGACGCATTCTGCGCACCGTGCAGGCTCCGATTTGTGCCCTCTTGTCG  
TCGCTCTTAAGGACCTGTTACGACTCGAAGCGTCCACCTTCGATTCCCTCGAAATTAACG  
CGACGGAAAAAAACACCGATACATTAATAATCGATGCACCGATGATAAGTAGTAAACA  
GTATTACCGATTGATATTTTTCTTGAAAAGAGGAGGAACGCGCGTTGTTTCTATCCAA  
CAAGCCGAGTATTAATAATGGATTAACCTCGTTAATGCAGAAATATTTCTAGATGCCACAA  
CCGCTATTTCTATCCATCTAAGGATGGAAGGCAGCTTGGTAATCCTCCTCGTAACTGTTA  
CCATCGATCCGAACCGCCTTTTAGAGAACCCGCTTTTCTTCCGGCAACCTTCCATCGTC  
TGACGACAGGTCTGGACGATGAAAAATTCCCACGAAAATTGCGCAATCGCGGCGAAAT  
CGTTGTATAAAAGCGGCGGTGACGAGAGGACGCCAAAGGAGTAGCTCTCTCGGTTCA  
AAGAACTTGATCGTCGCGCCCTATATTTCTGTTATCTCGGTGTCGTTAAACCACGCTTTA  
ACTCGCCGGTTTTCTTCTCGGTGCGATAACGCGATACCGCGGCTCAATTGCGAGTCGAGA  
ATTACGCCTCTCAAACGGACGCTTCTTTGTTTTCTTTTTCTTTTTTTTTTGCGAGT  
ATGGAACGAGGATTCTTTGTCGTTGGAAAAAAATTTGTTTCGAGGCCGAGAC  
GAGAGGATGGGATTATTTTAGGGATAGGATTATTTTCGGGTAATTAGCACGACTTAAA  
TTGATTTACAGACTCGGTGTCGGCTCCGCGATGGATAGAACGGTTCGCGCACAGCTCCG  
GTTGAGGAAGAGAAGGAACAGGTTGAAAGGTTTTAGAAAGTCATCCTGACTTATTGA  
GCTTTACTCTTTTATTAGAAAGTTTGCTGATACTGTGATTCTTAACGGAAGACCAGAAA  
GCAATTTACAGTTAACAATTGGTGAAATCAAACGTATTGTTCAATTCCTACATACGGGT  
CTTTATTATTTGCAATAACTTTTATTAGTTTTATAAATATGTGTATATATATATGTATATATGT  
ACATATATATATATACATATATATATATATATATATATATATATATTATTACTTTTACTTTATCGATC

GTTGATGAGGTTGAATAGAAGGGAGAAATTTGAGAAGAGAGGAAGAGAGGAGGAAA  
GAAAGAGTAAAAAAGGCGTCGCATTGGAACGCAATTTTATTAACGGGACGGGGATTG  
GTTTGACTCGATTTCGATCCGTTGGAGCGTTCCTTTTACCTCCTCCTCCTCCGGATTG  
GTTTACGCCGGTTTCAATTTGTGGCGCCGTCCGCGAAGCTTCTTCTAATTACCGCTAATT  
AGTGCCGATGCTGTAAGTGGCGGCTGTTCTCTTCTCGGATCGTTGAAAGGAATTCCCCT  
CGACTATTGGCGTCGCCTAGTTTCCAGGAACGTTACTTTATCCAGAAACGGGACAGAG  
ACTCTGAAAGCGATACCGGCGCTTCTTCTTGC GTTACATCCTCGTTAAGAGACTAGGCA  
TTTTGCCTAGGTATCAAAAATTTTAATCTTTTCGAATTGGATATTCCGCGGATATTTTTTT  
AATTCCACCTATATATTTCCAATTTCAACTCTTCTTCTTCTTGCATTAATTAAACGCGTA  
TTTATGTAATTAATACTTTTTTTTTTTTTTTAAGTGTTACAATCGATTATCGCATTCCAAC  
AGATTACAAGCTCTTTGAGTCGGAAGAATGATTAAAAATGGCGGAAGAGCGTTGTTA  
CGAGGAAACTCGGTCGCGAGAAACAATGGTGTA ACTCTATTAGGATCGTGCAAAGGTT  
GGCGGGCGAATATGACGATTCTAGGAGAGGTTAAATCAGGCCACATGCGCATTTCACT  
GGGCGTGGCCGGCCACTGTACTCCACTTAATCCGAACGACAACGTGACGAAACACG  
CTTCCCTTCGCTGCAGAATTCTCCAAAACGATTGAATTCCTGGTTCAGTTGGATCGAT  
AAACGGATAAGGGATAATGAAAGGAAAGAAAAATCCAG

>novel\_circ\_001700

AGGATAAGGAGAGTGGCGTAGATTACGGTCGTAAGCTGGATTAAGGGCACGGACGTCA  
TGGAGCGGTACGAGGAGGAAGGCGAGGACAGCGACAACGAGACAGACCCGGAACAA  
CTGTTGAACGAATGGCTCGGCGAGTTGGACAGCCTGACCGTGGTGTGCCTCCTACGTT  
CTGTTGTGCAACGCAGAGGAAGTGGAACGAGCCGTCTACCGAAAGAAGAAGGAACTT  
TGA ACTTGAAAAAAAAAAAAAAAAATTGATCATTTCAAACGAAATTACGTTTTTTGGTAAG  
ATAAACGTATTAAATATCATCGAATAAAGAATCGTTTAACGTTGTGCGAAAATGTATTCA  
TCGAAAAAAAAAGAAGAAGAGAAAGAAATTGTAAAAGAAGCAATATTTACGTGTTTACA  
AAAGACGAAAAAGAGATGGTTGGTTTGGAAATACAAGATTGGGATCCACGGTATGGG  
AGAGGAACGAAAAGGAGAGGATTTTGAGAAACACTGCGTATCTGTGCCGAGCGCCAC  
GCGACCAGGTCGTCCGGTCGGGCTGGGTGCCGGGTGTTGTTGAAATCAACGTGGTGG  
GGTTCCTTCGACGACCACAACCGGAGCCTTATGCCTTCAGTCGACTCTCGGCTCTCACT  
GCGACTCGAGCTGCCTGAGATTTCCGTTAATTAACCAACTACCGATCCGCGACAGCGG  
CTGGCCAACCACATCGCAGCCGCTCCAGATACGAATTCACCTTTCTCTCGCCGGAATC  
CGGAGTTGTCTGTCGCCAAAAAAGAAAAGAAAAGAAAAGAGAACATCTCGAGAAGAA  
GAGGCGAAGTCTGTTCAATCCAATCCATTCCAATTGCGCGACGTCTCGTCCCGGAGG  
ATGAATCGATCGAAGTCGGGCGAGGATCGACGAGGCCTACCGTTTTAAAGCGCGAGT  
GAGCGAGCGAGCGAGCGACTGTGAGGAACGATCGGCCGATCCCGGAGATCCGATCCG  
ACCAGTTCCTTTTACCGGTCGATCACCTCGATCCCGCGTCACAATCGCTCGTGGAGCGG  
GACGTGCACGTGCGGTACGCGTCGTTGGCTGTTAATTAGTACGTGGGTGCCGTGATAGA  
GTGGGAAGAGACGAAAGAGGGAGAGGGAGAGAGAGGGAGAGAGAAGAGTGAGTGG  
ATGCGAAGAGATGCCGAAAGCGGAGGGAGGACGATTGAGAGGAGCGGAGGAAGAGA  
GGATCGAGAAGTAAAGAGGCGAGAAAGAGGGTTGGAGGTTAAAGCCGGAGTTAAAT  
AGATGCAGGAATCTGTACGCGGCGGCGCCATGCTGGTGTAGCGAGCGAGAAAAAATAT  
TCGGTTTCCCGGTGTGTATCTCCTCTCCGTGTGAACGTGGCCGTGCGGATGGAACGTAG  
GAATCCAGGAGCGTAACAGTGAACGCGTTGCGGGCCGGTTGAAGGGAGCGTGAATT  
CGTTCAGGAGGACCAGTTCGCCGCTGCACAGGCGTTAAGAACCCGTTGAGACGTTGA

GAGGAGGAAAAGAGGTGAACGGTTCGGGAGAATTGTCTCGAGAGGAGATAACAGTG  
GACGATTCTTCTCGGTGAAAACGAATTTTATTATAAACGAGTTGGAAAAGGATCGATGA  
TCCTCGATCAGTGATTATTTAACTTAATTTTCTTTCTTTCTTTCTCTCTCTCTCT  
CTCTCTCTCTCTTTTCTTCTCGTGTTGTACGAACGAGTATAAAGGAATATACGCGAACG  
CGCGAGGAACATGTTGTGCGGCACGTTCAAGGAAGAAGAGAAGGCATCCAGGGGATGA  
GTATCGATTGGTGAGATCGAACACGATGCCTAGAATCCTGTGCGCGAAGGAAGGTAGC  
CTGGTCACGGTCCGGGAGAACAAAGTCCTCGAGGGTGGCGGCTCGTTCCCCTCATCTCA  
GGGATCTTCTGCACATGTGGAGAAATAGAGTCGAGCTAAAGCGACGAGGGAAGCTGT  
AACGAAATACGTATAAAGAGCGCATATATAATATATGCGACGGAAGAAAGATAGAGCGA  
GATAGAGTTGGCAAAGAAACAGAAACGAACGAGAGGAACGAAAGAACGAAGAGGG  
AAAACAGGAGGCTAACAAAGGGTGGGAGGAAGACGGAGTGAAGGTAGCGCGATTGA  
GGCTAACGTACAGAGAACAGAGAGGGTACTAGAGAGTTGCGGGGAGAGTCGTAGAGT  
GGAACCAAGATGGGATGACGAAACTACGAGGAGGAGAAAGAAGAAATTAAAGGGAG  
AGAGAGAAGATTGAACGAGAGGAAGATAAACGGTAGGTCTGACTGAATCATCGAAGA  
AGGATGGAAGATACGATGCGGTTGTGAGTAACGGGGAAAGAACGACGAGAGAGAGGT  
AGTGAAGAGGTGACGAGTGCGAGAGAGACGGAGGAGCGGCGGACGATTCAGTGAAA  
AGAGCGAGAGTGAGCGACAAACGGAGCTTTTCGAGGGTACGAGAGAGAAAGTATTACT  
GTTCCCTGTCCGTGGAAAAGAGAGGGGAGAGGGCAGATGAAGCACGTCTGGACAAGA  
GAAAGAGAGAGTGTGAGCGTGGAAGGGAAAGAGCAGGGACGAGACAGAGTGCGCC  
CACCGAGCCGCCTCCATACCACCTCCAGCATTCCCGGCCTGCACACACAGTTGCAGCT  
GCACCGCCGCGGTGCTCGCTCGTGTGCACATGCGAGACTGCGCGCGCGTCCATCTCT  
CGCTCGCTCGCAATCATCTCTTCGCCGGTACGCTGTGTGTATTAACGACGCGCTCTCTT  
CTCGATATCGAACCGTATAGCGTGTAAGTTTTTCTCTCGACAGCAGAGTGTCGTGTAC  
CAAGTTTCGAGCAGCCAGTTTTCTCTCGTGACTGTGCGCAAAGAGGATCGTGATCGTAT  
CGATCGGATTATTCGCCGTCAATGTTTCGCGAACGAAATTCGAAAACTTTCAAACCTTT  
TCGAAAAATCGCATCGATATTGTTCTCCAACGAAATTATCTTCATCCATAGTGAGATATC  
CAGTGAACAAATTTTTTCCAATAAAATTTCTCGGAAGCATATACGCGATTGGTGCACG  
TGCAATTCGTGGTCCCGGTAACACGTCGAAATTCGACATCTTGTTAATTCCAGGAATATA  
TTACACGATCGATCAGAAAACTTTGACATTTGGCAAATGTCAGCGGTAGTCTCTGGC  
GGAGTCTCTTCCGTATAATCGAATCGTGGCTCGTGATAAACGATAAGAAAAAGCGGTTA  
CAGCGGTCGAGTGTTTCTCTGTTCTTTTCGATACACACGTACGCACGCACACAGAGTAT  
CGCGGTTGTTTCTTCGCTGTTGTGATATCCGATCGATTTCAAGGGAGACATGTGATCTC  
GCGTCGAAACGAGTAAGGAATAGGATCGAGAAGAAGCATCAGCTTGACCGGTGCTC  
AGAGGCTCGAAAGGGATTTGAAGATGGATTGGATGAGAAGGCAGGACATTAAGGAGG  
AGTCACCGGAAACTCCTACCGCTCTGACACCGGATGAGCCGGACGAGTCCTACTTCGA  
GGAAGACACCTCGATAGACGAGGGCATGCTCGCGGATCACCATCCAGTGTTTCGCAATA  
CCACGCCAGTAGTCGCCGCTCCTCCGCTCCCAACCTCGATCGTCCTTTCTCGCGCTCCT  
TCCCTCCTCGAGATCTCCAACGACGAAACGTATCTCATCTCATCGTAGTGAAAGAAA  
AGAAATTACGAAGAATTCTTTAGAATACAAAGCGTTTTTTTTTTTTTTTTTTTACAAA  
AATTTGTGCGATCTCGAGTCGGCGAAAACGATGCTGTGCGCAGTTCCCTCTCTTAGAT  
CCGGAAGGAGGAGGAGTCAGGTTGGAAGGATTACGAAGTGAGATCGATGTGATCGAT  
TCCTGTACGGGCTGTCCCGCCGCGGAAATCGCGCGCGCCGTCGCCACGCGGGAGGA  
AATCCGAGCGGGCCGATGATTTCAATAGGCCGGTCTCGCTCGAGAGAGGAGGCGGTT  
GAACGTTGTTGAGAACGTTCAAGGCCATGACCGCGATGACTATCGTCGTCGCCAATAA

ACGATCCCTCGGCCAGGTTCAAGAGCGACGCGGTGTTTCACCCCTCCCCCTCGTATCATC  
ATCCTCTCCTATCCATTCCAGCCTCGATCGAGGAGGAGGGATCGATTCTGAAGCGGGAA  
AGATCTCGTATCAATCTCAAGTCGATGGAATTTTTCCAAGATCGATCTCTTCTCACGATC  
GTTCTCTCGCCATGTCGGGGATAATCCATGTGGTGGATCGTTACTCGGCCGTCCGACC  
GATTTTTCTGAACGACGATCACCGAGGAGGAGGGGATTATCGAATTTGGAAGATGTGA  
AGAAGAGGCAAAGGCCGCCAAATGGACAGGTTTTTCCGATGGAAAAGTCACAACAGG  
GCGCAGGAGGACGGTCTGGACAATGTGAGCTCAGCGACCCTCAGGCCTTTCAACTCG  
GACATCAACACGCCGAGGATCGACAGCTATAGGTTCTCCATGGCGAATCTGGAAG

>novel\_circ\_001701

AACTCTTTAGGAACGCAGCAGAGGCTGGACCTCTGGACATCGTGAAGCTTTGCAAAG  
AGGACAAACTGTTGAACATTTGACTAATTTGCCGGCGAACACACCCGATTCTCCCTAT  
GTCCTTCAGATCGTCGGAGCTCATCCGGCCTCGTCGGGGGTGATCGAGGCGGAAGTGC  
TGTGGGGCCCTCGAGAGGCGTGTGGCGGCCTTGGAACGGCAACTTAGGGAGCATCAAG  
AAGCTCTGTACGCATCGCCTTCGTTTCGCTCTTCGCGAACTGAAGCGGCAGGTCGACAG  
TTTCAAGAACAAGTTGGAGCACAACGACCAACTCAGTTGGCTGAGTTTCTACAAACA  
GCTTCCAGAGCCCCTCTACGCGGATTCTGCCGCAGATTGCAGTATCGGCGGAAGAGC  
GACAGCATGAAGCGGAAGGTGCGAGAAAAGTTCCTCAATATTTG

>novel\_circ\_001702

AACTCTTTAGGAACGCAGCAGAGGCTGGACCTCTGGACATCGTGAAGCTTTGCAAAG  
AGGACAAACTGTTGAACATTTGACTAATTTGCCGGCGAACACACCCGATTCTCCCTAT  
GTCCTTCAGATCGTCGGAGCTCATCCGGCCTCGTCGGGGGTGATCGAGGCGGAAGTGC  
TGTGGGGCCCTCGAGAGGCGTGTGGCGGCCTTGGAACGGCAACTTAGGGAGCATCAAG  
AAGCTCTGTACGCATCGCCTTCGTTTCGCTCTTCGCGAACTGAAGCGGCAGGTCGACAG  
TTTCAAGAACAAGTTGGAGCACAACGACCAACTCAGTTGGCTGA

>novel\_circ\_001703

ATCGTGAAAGGAGCGGGGAAAGCATGGCCTTCGATTTCGACGGGGAATAAAATCGTACG  
CGCCGTCTGAGATTCTCGGCCCAAGCGTTCCACGAAAAAGGTATTAGTTCCTCGAAC  
CGCGTTGTTGGTTTGCCTTCAAAGTTGTTTCGAGTGGCGAGCAAAGAGGAAGAGGAGG  
AAGAGAGCGAAGGGGACGACGAGCAAACAAAAGGGAAGAATCTTGCCAATTACTG  
CCGCTCTGAAATAAG

>novel\_circ\_001704

TTGAACGTTACCAAAGACCATTTGGGGCAAATTTGTCCAACCTGGTGGAAGTGTTCCAC  
AAGGGCAGCAGAGCAGCGCAGGTTCCGTCGGCTCGGCACCTAGTCCGGCATCGCCAA  
GACCAACTCCTCAACCACGGCCACCCGTTGCATCGACCGCTTCGCAACCCTCGAGAAC  
GTTGGACGATGACAGATCGACGGACGCTGTAGGTACTGGGACCGCAGCGGAAGATTC  
CGACGATGGCGAGAGCATAGCGCAATACGTGAGCACAAATTGCGTCGTCTTCACCCAT  
TATCGAGGGGATGCCGCGTCCGAAGTGAGGAACACTTTCAAAGGGCATTAGCGCAC  
GACAAACCGAAAG

>novel\_circ\_001705

AATGTTGGCAGCTGGTAATAAAATCCAAGAACATACCATCAATGGTGAAAGCCAAGGA  
CACCGATTACGTGATCCTGGACTGCGACTACGATCTCGAGGACACGCCGAGCAAGGGA  
TTAGTCGTAAAATGGTTCTTCAACGCCAACGAAGTGGCTTACCAATGGATATACGGTAG  
GGACCTTTGGCCGGGGACATCACGCGGAAGTACGTCGACCTGAAGTACAAAGCCAG  
CGACGATCCGTACACCACGTATCGAGCCATGAAATTGAATAAGCCCGGTATCGATCTTA  
CTGGCGAGTACAAGTGCATATCCACTTATGCGGATGAGCAGTCCGCGAGTTCCTCC  
ATGGTTGTGTATTCAACGGAGGACAAATTCTGAACCTTCTATATAAAAAGAAAACCTATAGA  
TGATAAGGATGGAGTAGAGATAACATGCATAGCAGAAGGGTTATATCCAATACCCACTC  
TGGATATATCTATCGAGGGTGTCTTGGAACAAAGCAGCAAAGCCCACCGTTACGCT  
GCGTGCCGATGGACTGTACAATATCTTATCACGGACGGCCTTACTGGACGAAGATTAC  
CGGAAACAGCGATTGTCAAATGCTTGCTCGGTATACCAAAGGTGAACTACAATGTTTCC  
CGCAAAACCGTCTACTATCCCG

>novel\_circ\_001706

AATTAGCAGATCCTATTTGACCACTTGGACCCATTTGTGCGCCTGGACCGCCAGATCCC  
ATTTGATTATTTGAACCATTCCTGGACCCATTTGTCCACCTGGCCCATTCCTGGACCA  
ATTTGACCACTAGGTCCACTTCCTGATGTCATTGGATTTCCAGAAGGATTTCCAGGTCC  
CATTTGATTTCCACCACTTCCAGGTCTTATTTGTCTCCAGTATTATTCCTGGGGTTATT  
TGTCTCCACTACTTGATCCAATTTGTCCACCAG

>novel\_circ\_001707

AAATGGATCAGAATGGTGGAGATTGCGGAAAGAATTTCAAAAAGTTTCTAGTAAACCT  
CAAGATGTGATTAATTATTTAAAAGAAACAGATTGTGTTATCCAGGAATTTGTTGAGTTA  
TGTAACAATGAAAAATTTGCAGATTTTTTACCACCTTTATCACGTTTATTTCTTGAATTG  
ACATGTTTGGTTGTTTTGATATAAGACTGAATAGTTTTTCAAAAGAAGAAAGATGTGA  
AAATTCTATAAGTTCAAAGTTAATTAAAGCTGCCTTTGCAACAAATAGTGCAATTTTAA  
AGTTAGATAATGGATTGCAATTATGGCGTTTATTTGAAACACCATTATATAGAAAATTAC  
GTAAGGCACAAACATATATGGAACGATTGCATTAGAATTGGTATCTCGTAAAAAAAAC  
AATATGAAAATACGATATAATAAATCATTTCTAGATGCTTATTTAGAAAATCCTGTTTTGG  
ACATTAAGGACATTGTGGGCATGGCTTGTGATATGTTACTTGCTGGAATAGATACT

>novel\_circ\_001709

CTTTAAACCAAAGGCAATCTCACGAAGCATATGAAGTCGAAAGCTCATTACAAAAAA  
TGCGTGGAATTAGGCGTTGTCCCAGTACCTACAGCAGTCTGCGATGAAAACATCGATA  
AAGACGCTATAGCCCCGGTTAGCAGCAGGTGGCAATATCGAGGAGTCCTCGGAGGAAG  
AGGAAGAGAGCGAAGGAGAGGAGAGCGAGGAATCGAGGAGCGAGGAGCAAGAAGC  
TGCACAGAGTTTGCTAAGTCTGTGCGCAACGTAATACGAATAGATATCCAGGATTATTACC  
ATTTGGACGACCTACGACTTATCCTTACACTCTCACCTTCCCGACAACCTCCACATTG  
CAAGCGTATCCACCACGATAAGCAACAATACTTGTCTGACTAGCCAATCTGTCACTATG  
CAAAAAACCACTCTCGTTGAAACGAATTGTCCCAACGCTACTATTTTTCGAGTCGAAT  
CGGGCCCGAAGACTCGAGGACGAGCGTAATCCAATCATCGAAGAAAGAAGAATGCCC  
TGATGTCGAAGTGAACGAGATCGTCGATATCGATTAGCAAATAGTTTGCCGCAGCCCA  
TAGATCTGACAACGAAGCCAGCCTTGCAAACATTGCCCTCTTCATACCGCAAAGAGC  
CAGACCAGCAGACATTTAACTCCCGTTTCGGAACCGGTCTTGTTACAAACGATCGTTC

AAACTATGGAAAGACTGCCGATACAGGGGAGAGAGTGGAAACCGGATGCCGAGGGAC  
ACATGTTGCAAGCGTATCTCACTGAAAGGCATGTTATGGATAGCAAGATTAAACAACAG  
TATCGGGTGGGGAACATTAAGAAACAAGTGAAGGAGAGGGATATTTATCCGCAACAAA  
ACTCTCCGAAATCGAGAAGCATTGAATTAATGGAAAGTATTCCAGCAACGACTTATACA  
GATTCCACCAAGATGCAAATGCAGGCAGTGATAGATTCCAGAATCAAGCATACATCGA  
AACATACCGCGGAAAATATCGGTTTAAACGAGTCCTGTCAATTCGAAATTGAATCACGAC  
ATACGTTTGGAGCCAAGATATGCCTTCCTCGAATAACATGGAGACTGCCAGACCAGTCAA  
CATAGATAACAGACCTCCGAGCAGAGATATGATTTTATTGTCGGATAACAGACACCATG  
CCCAATCTCAAGAATCGAGAGTTAATTTGAAAAGTTGCCATTAATGATGCACGAATCC  
TCTAAAATACATGAAGTCTCGAGACCGCAGAACATTGATATGAGAAACATGGATCGTAT  
TGAAATGAATCATACGGATATAACGAAACAAAGCATTGCGGAAAGTATTAAACATACAG  
TTGCGCGGAAAATGGTTGTTGGAGGGCCAGGCTTCAGATCACCCCTTTCCTAATGCATCA  
ACCACCAAACCACAAGCTGAATTCTTGCAGCCTTCGAATGGACCTGCCCCTAATTACG  
TCAGTTACAGTGTGACTGAGGATGGAAGAAGCGTGTGCGGAATTTGTAATAAGGTGTT  
CAGCAAACCTAGTCAGTTACGGTTGCATATCAACATTCATTACTTCGAGAGACCATTTA  
GATGTGAAAGTTGCGCTGTCTCTTTTCGAACCAAGGGTCATTTGACAAAACATGAGAG  
ATCTGTTTCTCACCATAATAAG

>novel\_circ\_001710

AGTTGCTCTTTGGATTCTGTGACTCATGATGTGATTGCGAATGTTTCGACGGATACACC  
GGTCCTCGTTGCGAAAGCTGTGCGGAAAATTACTTTGGCCATCCTGAGATTCCTGGTG  
GCAGCTGTGAGTTTTGTAAGTGAATAACAATACGGACCTTCGTCTAGCTGGAAATTGT  
GATCCTCATACTGGACGTTGCCTACAATGTTTGTACAACACTGATGGATCAAACCTGTCA  
GATATGCAAACCAGGATTTTACGGAAACGCTCTTGAACAAGATTGTCAGGATTGCCAG  
TGTGATGTTTTGGGTACAGATAGAAATGCTGGACCTTGTGATCATCGAACAGGACAATG  
TCCTTGCTTACCTCATGTGATCG

>novel\_circ\_001711

CTCCCCACCTGGACCCACAACAAGTTCTTCTGTTGGAGCAGCTGGAGCAACTGGAA  
GCAGTGTTGTAGCTTCTAGTTCTTTAGGGCTTGTTTCCACACAACAACACACACTCCT  
CCTCAACCTCCTGAACTGCCAATGTTTTCATGTCCTCGGAGACCAAATATAGGACGTGA  
AGGCAGGCCAATTGTCTTAAGAGCTAATCACTTCCAAATAACAATGCCACGTGGTTATG  
TGCACCATTATGATATTAATATTCAACCTGATAAATGTCCTCGTAAAGTTAATAGAGAAAT  
AATAGAAACAATGGTTTCATGCATATACCAAAATATTGGAACCTCTTAAACCTGTATTTGA  
TGGAAGAAATAATTTATATACAAGGGACCCCTTGCCTATTGGTACTGATAAAATAGAATT  
AGAAGTAACACTGCCTGGTGAGGGTAAAGATAGAGTTTTTCAGAGTTGTGATAAAGTGG  
TTGGCTCAAGTTTCACTATTTGCATTAGAAGAAGCTTTAGAAGGACGAACAAGACAAA  
TTCCATATGATGCTATACTTGCTTTAGATGTTGTAATGAGGCATTTACCATCTATGACATAT  
ACTCCAGTAGGTAGATCATTCTTTAGTACACCAGATGGATATTATCATCCATTAGGTGGT  
GGAAGAGAAGTTTGGTTTGGTTTTCATCAATCAGTTAGGCCATCTCAATGGAAAATGAT  
GTAAATATTGATGTATCTGCAACTGCATTTTATAAAGCACAACTGTCATAGAATTTATG  
TGTGAAGTATTAGACATTCGAGATATAGGAGACCAAAAAAGACCTTTAACAGATTCTCA  
ACGAGTTAAATTTACCAAAGAAATTAAAGGACTTAAATTTGAAATCACACATTGTGGA  
ACAATGAGACGAAAATACAGAGTGTGTAATGTTACACGTAAACCTGCTCAAATGCAAT

CATTCCCGTTACAATTAGAAAATGGACAAACAGTTGAATGTACAGTTGCAAAATATTTCTAGATAAGTATAAAATGAAGTTACGTCATCCATATCTTCCATGTCTTCAAGTTGGACAGGAACATAAACATACATATTTGCCACTTGAG

>novel\_circ\_001712

TGTTTTTCATGTCCTCGGAGACCAAATATAGGACGTGAAGGCAGGCCAATTGTCTTAAGAGCTAATCACTTCCAAATAACAATGCCACGTGGTTATGTGCACCATTATGATATTAATATTC AACCTGATAAATGTCCTCGTAAAGTTAATAGAGAAATAATAGAAACAATGGTTCATGCA TATACCAAAATATTTGGAACTCTTAAACCTGTATTTGATGGAAGAAATAATTTATATACA AGGGACCCCTTGCCCTATTGGTACTGATAAAATAGAATTAGAAGTAACACTGCCTGGTGA GGGTAAAGATAGAGTTTTTCAGAGTTGTGATAAAGTGGTTGGCTCAAGTTTCACTATTTG CATTAGAAGAAGCTTTAGAAGGACGAACAAGACAAATTCATATGATGCTATACTTGCT TTAGATGTTGTAATGAGGCATTTACCATCTATGACATATACTCCAGTAGGTAGATCATTCT TTAGTACACCAGATGGATATTATCATCCATTAGGTGGTGGGAAGAGAAGTTTGGTTTGGT TTTTCATCAATCAGTTAGGCCATCTCAATGGAAAATGATGTTAAATATTGATGTATCTGCA ACTGCATTTTATAAAGCACAACTGTGCATAGAATTTATGTGTGAAGTATTAGACATTCTGA GATATAGGAGACCAAAAAAGACCTTTAACAGATTCTCAACGAGTTAAATTTACCAAAG AAATTAAGGACTTAAATTTGAAATCACACATTGTGGAACAATGAGACGAAAATACAG AGTGTGTAATGTTACACGTAAACCTGCTCAAATGCAATCATTCCCGTTACAATTAGAAA ATGGACAAACAGTTGAATGTACAGTTGCAAAATATTTCTTAGATAAGTATAAAATGAAG TTACGTCATCCATATCTTCCATGTCTTCAAGTTGGACAGGAACATAAACATACATATTTG CCACTTGAGGTCTGCAATATTGTTGCTGGGCAACGTTGTATCAAAAAATTGACTGATAT GCAGACTTCTACTATGATAAAAGCTACAGCTCGTTCTGCTCCAGATCGCGAAAGAGAA ATAAATAATTTAGTTAGAAGAGCTGATTTTAATAATGATTCATACGTTCAAGAATTTGGT TTGACAATATCAAATAATATGATGGAAGTTAGAGGTCGTGTTCTACCTCCACCCAACT TCAGTACGGAGGGCGCGTAAGTTCCCTCAGTGGACAGACAAAACAACAGCTATACCT AATGGTGGTGTGTTGGGACATGCGTGGAAAACAATTTTTCACGGGTGTGGAAATTAGAG TTTGGGCAATTGCCTGCTTTGCTCCACAAAGAACTGTGCGAGATGACGCAATACGTAAT TTTATAGCACAATTACAAAGAATAAGCAATGATGCTGGAATGCCAATTATTGGGCAACC ATGTTTTTGTAAATATGCTACTGGCCCAGATCAAGTAGAGCCCATGTTTAGATATTTAAA AGCAACATTTTCATCATTGCAACTTGTTTGTGTTATATTACCTGGAAAAACGCCTGTATA TGCTGAAGTTAAAAGAGTAGGAGATACATTATTGGGTATGGCAACGCAATGTGTACAA GCAAAAAATGTTAATAAAACATCACCACAAACGCTATCAAATTTATGTTTGAAAATTAA CGTAAAATTAGGTGGTATTAATAGTATTCTAGTACCCACTATTAGACCAAAAAGTATTTGA TGAACCTGTTATATTTTTTGGAGCTGATGTGACTCATCCACCTGCTGGAGATAATAAAA AACCTAGCATAGCTGCAGTAGTTGCCAGTATGGATGCTCATCCATCTCGATATGCAGCTA CTGTTAGAGTTCAACAACATAGACAAGAAATTATTCAGGAACCTTAGTTCAATGGTGAG

>novel\_circ\_001714

GGGAGGACGGAGTCGAAGGCTCAGGGCCCCGGCGCGGACCTCCAGGGGGAGGAAGGC GGCGATTGCGCGGAGGATGACGGCCCAATTAGTCCTAGCGAGAGAGGTTGCGCAACG GTGGCCAAGGAGGAGGAAGATGGGGACGCGACCGACGAGGAGGACGACGAGGACG GATCGCCGCCCCGCCCATCGCCTTCGCGACAGCGAGACTGAACCCCGCCATTCTGAG GGACAGTGGACCGCCGGACAG

>novel\_circ\_001715

GTAAGTAGTGGTCTCCGATCGTTTGAAAAGCGAGCGGCCCCGAGCCGCCGCACCGGA  
CGGGAGACATGCGCAGCAAGCAGCAGCCGAGGCCTTCCTTTCGGTGGCCGCAGCAAC  
GCGGCGATAATCTTACCGGGGAGGACGGAGTCGAAGGCTCAGGGCCCCGGCGCGGACC  
TCCAGGGGGGAGGAAGGCGGCGATTGCGCGGAGGATGACGGCCCAATTAGTCCTAGCG  
AGAGAGGTTGCGCAACGGTGGCCAAGGAGGAGGAAGATGGGGACGCGACCGACGAG  
GAGGACGACGAGGACGGATCGCCGCCCCGCCCATCGCCTTCCGCGACAGCGAGACTG  
AACCCCGCCATTCTGAGGGACAGTGGACCGCCGGACAG

>novel\_circ\_001716

GTGTGGGTAGATTCTCCCGTAGGAGCCATGAGTTATCAAATGTCATCGAATCAATCTAG  
ACCAATGTCTCACGAAATTATCAAGGTTTGGGTGATTACCCATGGGTTCTGCCAAAG  
AACAACTTTAATGTGGCAACAAACTCTTATCTGGGTGACTCCGGAATTCATTCTGGT  
GCCGTCACCCAAGCACCATCTTTATCGGGCAAAGAAGACGATGAGATGGAAGGTGATC  
AATTGATGTTTGATTTGGATCAGGGATTTGCTCAAGGTTTTACGCAAGATCAAGTCGAT  
GAAATGAACCAACAATTGAATCATAAAGATCTCAGCGTGTTCCGGCGGCAATGTTTC  
CAGAGACATTGGAAGAAGGTATAGAGATTCCCTCCACTCAGTACGATCCAGCTCAACC  
TACCGCTGTTCAAAGATTGGCAGAACCAAGTCAAATGTTGAAGCACGCAGTTGTCAAT  
TTGATAAATTATCAGGATGACGCAGATCTTGCAACGCGCGCGATACCGGAATTAATAAA  
GTTGTAAACGACGAGGATCAAGTCGTTGTGTCTAAGGCAGCGATGGTAGTCCATCAA  
CTTTCCAAGAAGGAAGCTTCTCGCCACGCCATAATGAATAGCTCGCAAATGGTGGCTG  
CCCTGGTCCGTGCCATTTCAAACAGTGACGACCTCGAATCGACGAAGGCAGCGGTGCG  
GCACGTTGCACAATTTGTCTCATCACAGGCAAGGTCTGCTGGCTATTTTCAAGAGCGG  
CGGTATACCAGCTCTCGTGAAGCTTTTGAGTTCTCCGATGGAATCGGTCCTCTTTTACG  
CGATCACGACACTGCATAATTTACTCTTGATCAGGATGGTTCTAAATGGCTGTACGA  
CTCGCAGGAGGGTTACAAAAGATGGTTGCCCTGCTTCAACGGGACAACGTGAAATTCT  
TAGCCATAGTAACCGATTGCTTGCAAATCTTGCGTACGGTAATCAAGAGAGCAAATTA  
ATCATATTAGCTTCCCAAGGGCCGATAGAACTGGTACGCATTATGCGTTCCTACGATTAC  
GAGAAGCTTCTATGGACGACATCGAGAGCATTGAAAGTGTTGTCCGTTTGCCTTAGTAA  
TAAACCGGTGATAGTCGAGGCTGGTGGCATGCAAGCGCTTGCCATGCATCTCGGTAATC  
CGAGTCAAAGGCTCGTCCAAAATTGTTTGTGGACGTTACGAAATTTATCGGACGCTGG  
CACCAAGGTCGACGGATTGGAGGGTTATTACAAAGTCTTGTACAAGTTCTTAGCTCTA  
CCGACGTGAATGTCGTACATGTGCCGCTGGTATTTTGTCTAACCTGACTTGCAATAAT  
CAACGTAACAAAGTAACGGTATGTCAAGTGGGAGGTGTTGACGCTCTTGTGCGTACGA  
TCATCTATGCTGATAGCCGGGAGGAGATCAGCGAGCCAGCGGTATGCGCGCTCCGTCA  
CTTAACGTCACGCCACGTGGAGGCAGAAATGGCACAGAATTCTGTCCGCCTAAATTAT  
GGAATTCAGGTTATAGTAAACTTTTACACCCGCCTTCGCGTTGGCCGTTGGTTAAAGC  
GGTGATAGGATTAATTCGCAATCTGGCGCTTTGCCCCGCGAATCACGGCCCCGCTGCGCG  
ATCACGGCGCGATCCATCATCTGGTCAGGCTTCTGATGCGCGCTTTCCCCGAAACGCAA  
CGGCAGCAACGCTCGTCCGTGGCAAGCACCGGAAGCCAGCAAGCGTCAGGCGCGTAC  
GCAGACGGTGGTGTACGAATGGAGGAGATAGTGGAGGGTACTGTGGGCGCGCTTCATA  
TCTCGCAAGGGAATCTCACAATAGGGTCATAATTAGATCTCAGAACGTGATTCCGATT  
TTCGTACAGTTATTGTTCAACGAGATTGAGAATATTCAACGTGTCGCTGCAGGCGTGCT



CTGCGAGCTCGCCGCGGATAAGGAAGGTGCCGAAATGATCGAGCAAGAAGGTGCTAC  
AGCTCCTTTAACAGAACTGCTTCACTCAAGGAACGAAGGTGTCGCGACATACGCGGCA  
GCTGTCTGTTCGCGCATGAGCGAGGATAAACCACAGGAATACAAGAAACGGCTGTCCA  
TGGAACCTACCAATTCTTTGTTGCGCGAAGATACGAATCTTTGGAATAACGCTGACTTT  
GGGATGGGTCCAGATCTACAG

>novel\_circ\_001718

GGGTAAATACGCGACAGTGAAGAGATGTGCGAGAGAGGTCCAGTGGACGACAATGGGC  
CGCAAAATTTCTACGGAAGAGGAGACGAGCGCAGGAATTGAGAGCGGAAGCGCTTCA  
CGAAGTCGCGGTGCTGGATGCTGCGGCCAATTGTTCCCGTCTGGTATCCTTACACCAAG  
TCTTCGAAACGAACACGGAGATGGTCCTGGTTTTTGAATTGGCACCCGGCGGTGAATT  
ACAAATGATATTGGATAGAGACGAAGTTCCGGAAGAACGACAAGTGGCCAGATTGTTG  
AAGCAGATTTTAGACGGAATAGCGTTCCTGCATTGCTTGAACGTGGCTCATCTCGACAT  
CAAG

>novel\_circ\_001720

GATGGCGCCAAAGAAAATCGAGGAACCGGAACGGAACCGCTTATTGGCCGTGTCGG  
GACCAATTTGAAAGTTGGTATAGTTGGAATACCTAACGTGGGGAAATCGACCTTCTTCA  
ACGTGTTGACCAAGAGTCAAGCGGCCGCTGAGAACTTCCCCTTCTGCACCATCGATCC  
CAATGAAAATATTATAATTGAATAATTAATCCTATCGACTCGTTGAATTTGCAAAGAAA  
CGTATCGATCTTGCGCGAATCGATGAAAGAGGCGCGCGTCGTTTGTTCGAATTTTGCTC  
GAAAGGGATTTTCAAAGATAACCTGAAAAATGAAAATATGTGCGACAAGAAACGCATT  
GCACATTTACGGAAGAAGAAGAAGAGGGGAAGAGTTCGACGAGTTCGACACGGA  
CGCATCGTTCATCTTGAAGAAAAGTCACTTCAAACACGTAAAGGTTACCCCCGCGAG  
GAATACGCCCCGAATGGCCCAAGCCTCTCCCCACCTGTACCCGAAAGCGAACAATT  
ACTACGCGTTTCACGAGGACGCGAACCCGTTACCAGATTCTCCGACTCGTGTTTGTG  
GTCCAACGACCACGAGAACACTCCGCACTTCCCCCCTCCGAGGAGCCGTACGCGAG  
TCGGGACCCGTATCTGGACACCGACGCGAGAGCGAAATACCTGGAGAAGGAGCCGAC  
CTGTTTCGTGATGCTCGGCAAACCCGACCTCAACACCATGAAACTCGCGAGCATGATC  
GCCACCACGTGGAATGCATACTGATCTGCCCCGTTTACCTGATCAAACCTCGAGATCGA  
GGAGGGTAGCGAGAAAGGCCGATTGATGGCTAACATATTGAAGCTGGGCGGTTACGTA  
GGCCCAGATATAATCATGAACCTGATACTGAACCGTCTCAACAAACGGGACATCCGTTA  
CAAAGGTTACATCGTGGAAGGGTTGCCGCTCATCCCTAACAAAGAAGCTCGACTACTCC  
TCCTATCTGCCCATGGACGAGGCGCGATCAACGAAGCGTACAGCAACGCCATGAAAT  
ATTTCAACCCGTCGCTCGAGATGACGTGCGGGGAGGCGAACCGCGGGGACTGGAAGG  
GTGGCGGGTGCGCGGTTCGAGGCGAGTTACGAGGAGTTGCTCTCGAGCCAGATCGAGG  
ACATATTCTCCAACCTGGCCGTTGAAACCGACCCTCATCATATACCTAATGTGCCCGGAC  
GTGGACCACATGAAGAAACGGAACCACTTCCGTTTGAATCCGTTGATCGGCCGTATCA  
TCGACACGAGTTTCCTCGAGATGACGGACAAGATCCAAATGTTGTTCAACCACGAGAA  
GACCAGACACTACTTGAACGCGAGCTACGAATTGTACAAAGAGTTGATGGACGAGGA  
GAGGATATTGGACGAGGATCACGGCAAGTATCTGTTGAAACGGATGTCGGACGAGCCG  
TCCAACGTGAAGATCCAATGCGAGTTGTACAAACGTTTGTTCATACCCGTCATCGACAA  
ACGCATCTGCTGCACAATCCTCAGAACGTGATCCGCCTCGACGGCCGCTCGCCCCCTC  
CGTTTCATGTTCCGCACCCTGAGCGCACGTTGCGCACGTTGCCGGTGCGACGCGTCA

TCCTGCCGTCGAGGATGACGGAGAAGCTCGAGGATGAGTCGTCGCCCCGGGGACGAGT  
TCGAGGAGAGATCGAACGAGGAGGCTTATCGCGACTTGGCCAACAGGGAGACCGTCT  
CCCCGTTGTTCCCTTGGAGATTGTCCACCTGGAATTTCTCTGCCCCGGTCGAGTTGACC  
AGAGGAAGGACAAGGGTAGGGAGCCCTAGGCACAGCGTCCGTTTCATGAACAAGATA  
TTCTTCCTCTCGTCGAGCAAGGCGGTTCGATCTGTTTCGTCGAGAATCCGCGAACCTTTCT  
CCACCCGTTCTCCCCGCGGCCACGTGCAGAGTCGTCTGTTCGGCCCCGATTACTCG  
GGCAAGTCCGACCTCTGCCGCCGGTTGGCCCCGAGAGTTGAACGGGGTTCGTGATAAAC  
GTGAAGGAGATCAAGAGATCCTGGATCCCCTTCGATCCAGAGGAGGAGCAGGAAGAG  
GAGGAGGAGGAGGAGCTGTATCTGACGAGCGGCGTTTCGTTTCAGGAACGAGGCGGAC  
GCGATTATCAAACGATAAGAGATATACCCGGGGAGAGGATCGACGAGAAGGTGTGGA  
GGAACGGTGGCTACGTGGTGGACGGCATGTACCCGAGCGTCGACTCTTGGAACATGAT  
ACGGGATTCGGGGATCGTGTTTCGAGGACGCGATCCTCCTGGTCGACGAGGAGCCCTAC  
GATCACCTTACGTCCAAGTGGCGCGACATCTTCGAGGTAAAAACGAGACGTTTCGATC  
GTTCTAGAGAAGAGGAGGAGGAGGAGGAGGACGAGGAGGAGGAGTACAAGGAAGG  
ACTGTTTCAATACGTAAGGCGCGTGCAACAGTTTTACCTCGATTGGAAGGCGATGGAG  
GAGATGGTCGCCGACAGTTGCGAGACGTTGATCCCCTGCAACGTCGGGAAACTCGTC  
GACCCGTTCCGCCACGCGATCCAACGGATCAAGGATCGTTACACGGACAAAGCTAGGA  
TCATGACCGAGGAGGAGAAGGAGAGGGAGAAATTTCTGGCCGAGTACGTGGGCATGG  
CCGACGTGACCGTGGATATGGAAGAGGAAGAGGAGGAGGAGGAGGAGGTGGAGGGG  
GAGGGAAAGGAGGTGACGACAGGGGAGCAGAAGCAGAGCGGCAATCTCCGTTTCGG  
CGACACGGCCAATTACTGCCCGGTCGCGTTGATGAGGTACAACGTGTTCTGGAGAGGG  
AAGGAAGAGTTCGCCGCCATTTTCATGGACAAGATATACCACTGCTCCAACGACCGAG  
CCCTCGAGGAATCTTGCGCGACCCGGCGAGACTCAATCTCCCCTTGAGGAAACCGTT  
GCCACCCCTGCCACCCCTCCGCGTGAGCGTGATCGGCCCAACCGGGAGCGGGAGGAG  
CACGTTGTCGGACGCGTTGTGCGGTGAGTGCGGCCTCGTTCACGTGGATTACCTCAAC  
TGCTTCGCCGCCTATATGAGGTCGCGCGCGATGCCACCCATCACCGACAAACACGCGAT  
AATCGTGACGAACAGGGGAGAAGGTCTGCTGGAACCGGTTCGAGCTGCCCCGACGATCT  
CGACGACGAGAGGTACAACAGCGACCCGAGGACCGTGCAAACGTTTCGTCCGCCGTTA  
CTGGAGCGAGGGTGGCCACCTGCCGTCCAGGATGCGCAAGGAGTGCCTGTTGGATTAC  
TTCAACGGGCTGTTCAACCGAACTGGACTGGTGCTCGACCAATTTCCAAGCTGCCCCG  
AAGACGTGGAGACCGCGTTGAGGGATTACGCGGTGCCCGAGATAGTGTTGGAGCTTC  
GCTGCGGCAAGGAGACGGCTACCGAGAGGATGATGGGCAACCTGTTCTCGTTGTGGG  
AGAAGAACTTGGAGGCGGAGAAGGAGGCCGAGGGGGAGCGGTACGCGATGGAGATG  
AAGCATTACGAGAGCAGGAGGGACGATTGGATCAGGGAGACGTTGGAGAGGGAGGCC  
GGGTTATTCGATCCACGGGAGGTGGAGGAGGAGGAGGAGGAGGAGGAGATCGAATCG  
AGGAGGTACGAGTTGGAGGAGATGTGGTATCAGGAGAATCCCGAGCCTGTGTTGTTCA  
CCGAGTGGGAGGATTTTCGAGACGGCGAGAATGAGGATCGAGGAAGAGTTTTTCGAGGA  
GGTACGACAACGAGGCCGAGAGGGTGAGCGCCGTGAGGGAGAGTTTGGCCAACGAG  
TCGATACCGTACGCGGTGATCGACGGTGAGAAGAGTCCCAGGGACGTTTTCTCCAAG  
CGATGCTCGTCGTGAGCCGTACGCCCCGCCGACCTCGTCCACCCCTCGAGCAGATATC  
CACCGTGGACAGCGAAACGGCCGACAATCTCCTCGACTGCGGCTACTATTTCTCAGC  
TCGTTTCGGCCGTTGGTGCCCGGTCCAGTTGCGCCGCGGCGAGATCCCCCTCCAAATGT  
TCTCCCCGTTGGAGATCAGGGAGGACGTGTACCCGGTCATCCACCGCCAATACGTGTA  
CTTCCTCGGCGGCAAGGAAGCGCAGGAGGAATTCGTCAAGGATCCGTACAAGTATCTC

GAGCAAGACTCTTGCGCGCCGGTCATCCAGTTTCGAATCTCCGTGATCGGGCCGCCTA  
AGTGCGGCAAGACCACCCTCGCCGAACGATTGCGCAAGAAGTACAAGCTGAAGGTGA  
TCACCCGCGGCTCGGCCCTGCGCTACATCCTCAAATACTTCCCCTGGGTGGAATCGGCC  
GAGTCGGTCGAGTCCCAGCTACGCATGGGCCGGCTAGCCCCCATGGAGCAGATGAAAC  
GAGCCATCGAGATGTACTCCATCGATCCGAGCATAATCTCCCAGGGTTACGTACTGGAC  
GGTTTCCCGATCAGTCAAAAGGAATACGAACAACCTCACTTATCTCGGCATGCAACCGA  
TGGTAATCCTCGATCTGAGATCCGACCTAGCCTTCTCCGTGCAATGCTTGTGCGGGATC  
GGGGACGACGACGTGGTGACGAAACCGCCACGTTTTCCAGCAGATTTTTGGCCAC  
CTTTACGACGTGTGGCGGATCGATCAGGCCGATTATCGCCGCTGGTTGAGAAGTTTCAA  
TCAGAACGTGGTCGAGCTGGACGCGACCAGGTGCATGTGGCACGTGTGGACCCGTGC  
CGAGCAGAGCGTGTGCTCGATATACCTCGGGATCAGGAAGTATTTCCGCGAATGCGACT  
ACGAGAAGGTCCACTGTTTGAGATACATGAGCGTGTCCCCGTACGAGTTCAGGAGCAG  
GCAAAGCTCCAGTTTCCAGTCGTATTGTCCCGTGTGCTTGTACCGCGAGGACGCGATG  
ACGAGGAGCGACCCTGTACCCGATCGTCGAGGAACGGTTCAATTCAGGGAACACTTGT  
ACTGGATCTGTCCAAGCCACATGGACGAGTTCGTGCAGGATCCGGAGGGATTCTTCC  
ACCGGCAAACGCCAAGCGTCTCCCGGACGAGCGTCCACGAGTGTGACGGAGACGAT  
CGATCTGGAGCATCCGTGTTGGGTGAAACGGTTGCGGGTGAAAGGGTGTGCTCGGTC  
ACGTACGTGGACCATCTGCCCCGACCGGAAAATCGTGCGCGGAAGATTGGACGTGGGC  
GTGTTGTACAGGGACAACGTGTACCTGTTCTGCTCGAGCGAGTGCCGCGACAAATTCA  
TGAGAGAGGCCCGAAAGGTACGCGGACTTCGTCACTCAACTTCACCCGCACTTTGGCGCC  
GATCGACCCGAGGACGTTGCCGAACCTCGGCTACCTGGAACAGACGGTCGCTTCGTCG  
CGTACCCGTCCCTGACGCAAGATTCGATTATCTCTGCGACTATTTCAAACCGGCCAGCA  
AAGTTCCCGCTTTCTTGAACGTGCTGGACATCGCTGGATTGGTCAAGGGCGCGCGGA  
GGGGCAAGGATTGGGCAACAGTTTCCTCTCGCACATCAACGCTTGCGACGGAATTTTC  
CATCTTTGTGCGGGCGTTCGATGACGACGACGTTACTCACGTGGAGGGGGACGTGAACC  
CCGTGAGGGACCTCGAGATCATCAGCGAGGAGTTACGGTTGAAGGACATCGAATTCTT  
GAACGGCCATCTCGAGAAATTGGAGAACTTGTGTTTCGAGGAAACGACAAGAAGCT  
CAAGCCTGAATAC

>novel\_circ\_001722

GCTCGCAACAAACCAGCAGATGGAGTGGGCCACGTGAACCAAAAAGGGCTCGACAGG  
TCAAAAAGCGCCGCTGACAGCCGGGCAGAAAGGTGGCGCCCGGTGCGAAAGTTGCGG  
CGAAACCAGCTCAGAAACCCACTGCTCAGAAGGGGCAAGTAAAGGTTACGCCTAAGG  
CGGCTTCCGTCAAGACTGGGAAGAATAAGAAGAAGGGGCAGAGGCAGCAGTACGAC  
CTAATCGTGACCATCAATTTGAAGTTCGAACGGGGCGAAGGAAGTCCTCCGCCACGCGG  
TGACGTTGCCTGGCTCGCCAGCTCATAAATAATATTATTTGTGTTAGCCGTGCTAGTCGA  
GTTTCTTCCGATTGAGAGAAGAAGGCAGCGGCAACGATTCTCTTAGTGCGACTCTTCG  
AGGCTGAGCTTATTTATTAAGGAAGAGGAGAGAGAGAAAAGTCTCTCGCCTCGT  
GAGAAAAATTGGTGAATGTAAATTTTCGATTTGTGAGTGAAGCGATATGGAAACGGAG  
AAGAAATACACGACCGCCTATGGGAAATTGCGAAGATTGACGAGCACCATAGACGGCC  
AGATTGACAGATAAGCTCTGAATATGGACTCACGGAGGATCAAGTGGCGGAGTTCAA  
GGAGGCGTTTCATGCTGTTTCGACAAGGACGAGGACGGCACGATCACGATGGCGGAGCT  
CGGCGTGGTGATGAGATCTTTAGGGCAAAGGCCGTCCGAGACGGAATTGCGAGATATG  
GTGAACGAGGTGGATCAGGATGGGAACGGTACCATCGAGTTCAACGAGTTCTTGCAAA

TGATGTCGAAAAAGATGAAGGGCGCCGACGGGGAGGACGAGTTGCGCGAGGCGTTCA  
GAGTGTTTCGACAAGAACAAGGACGGGCTGATCTCGTCGAAGGAGTTGCGACACGTGA  
TGACGAACCTTGGGGAGAAATTGTCTGGAGGAGGAGGTGGACGATATGATCAAGGAGG  
CGGATCTGGACGGCGATGGAATGGTGAATTATGAAGAATTCGTGACAATCCTGACGTC  
GAAGAATTAGTTGAGTGGCCACGGGTCGAACTAGAAGCTATATCCAGCTGCCGGAAGT  
CTTCGTCTGAAGAACAGAGAAACTCAAACCCGTCGTCGTCAAGTTCCTCCCCAAATATC  
GTAGCAAGATGGGAACCCCTTCCCTCGAACCCCCACTTTGATCGAGAAACACCGATGA  
AGAAAGTAGCGAGCGAGAGAATCAGAGAAAATTGGAAAAGAATCGAAGAAAATAAA  
AAAACCGCTTGAAGAGGATCGATCGATCGATCGTTCGATTTATGGCGTAAGG

>novel\_circ\_001723

ATAACGATTTTCGAGCCATGAGGACGCATCAGCTGCGGCTCGCATCGCCTGGAATGTAGT  
CGTTCGAGAGGAGGAGAAAGATCCGCAAAAGGAGACAAAAGAGGGAGAGGGAGAG  
AGGGAGGAGGCGTTACACGTGGAGGAACCGAACGTGGCGAGGGAGGAATCGAGCG  
GAAATAAGGGTGACAGGCAGGGACATGCAAATGTCCCCGTCGAGCTTCCGTGAAATCT  
ACCCACGAGAGCCGAGAGGAAACAGAGACAGCGACGCGAGACGTCGCTCGACCGCT  
GTCACGATTCGCGGATAAAAACTCCCTCGTAGAGCGAGGGATACCCGGATCTCGATC  
AAAGCCCCCTGGCTGTGTTTACTTACCCTAAAAAAAAAAAAAAAAAAAAAAAAAATCGT  
AATCGATAGTGTTCAAACGATCTCGTCTCTTCGGTCGACGTATGCACATTTTCGAGGATT  
CATAGGAAGAAACGACACTGATACGGTGAGAAGAGAGGGGTGGTGGTGGATCGAGAA  
GAGACGAGGGTCAATATATAGTTATAGTCTAGCAGATATATGGGGAGAAGAGGGAGGG  
AGAAGAGGAGGAATCATCCAGATATATCCGCGTAGTACAAACGTAGGAAAGAAGAAG  
AAGAAGAAGAAGAAGATATTCAAATTACAAGCACACACACACACTCGTCGTATGT  
CAATCGTATCGATACGTATCGTAGCTAAGTAAAGAACTTCCAATAATAACCCTCGATA  
TAATATCAACGATAATCCGTGTGATCGAGAAGCAATAAAAGGATAGCGAAGAAAAAAA  
ATAAAAAGAGAGGAAAGAATCTCTCGAACTCGTATTCGTAAGTATATTCGCGTAAGA  
GAATCCCGCGTATTTATATATTTTCGTTTCGGCTGTGGTATCGTATATCTCGCGTGTGTCTAT  
CGCGGGGGAAGAAAGAAGAGAAAGGGGGAAAAAAGTCGTATCGTGAATCTCGAAG  
GGAGCTGCCCCAACGGGGGGGGAGTGCATCGACAGGATGGCGTTTCGCCGCGGCGAGA  
ATGATCCTGAAAGACAAGAGGCGGAAGACAAGCAAGGAGGATTTTCGGAGGACCAAG  
GAATAGGAGCAAG

>novel\_circ\_001724

TGCTCACCTCTATGCCGGGGCTGACCTTGAACCTCTCTGAACACCCAGTCAGCGAAGAA  
GCTGTTACCTGCCAGCTGTGCGGCAAGGTGCTATGCAGCAAAGCATCCCTGAAACGC  
CACGTTGCCGACAAGCACGCCGAGCGACAGGAGGAGTACAGATGCGTCATCTGCGAG  
CGGGTATATTGCTCGCGTAACTCCCTGATGACCCACATATATACGTATCATAAGAGCAGA  
CCCGGCGACATTGACATTAAGTTCTTTTGAAGGTTTAGATAAG

>novel\_circ\_001725

AGAGAATAATCGTGCGCCCTTCTCGATTAGTCGCGCACAAGTTGCACCGTCACCCGAC  
CAAGCCGTGCTCAAACCGTCTTTTTATTTATCTATTTTATTTTATTTTATTTTATTTT  
TTTTATATATATACTTTTTTTTTTTTTTTCGTTACTTTGGAACCACGTAATTATGCTTGC  
AGGTGCTACCACATCATGTATGTATATAGCATCTTCATCGTACGCTCGTTCTCTACTTTTT

ATCTTTTTATTACTTATTAGTTTTTTTTTATTATTTCTTTGTTACACACGTTTATATACGTGG  
TACGGCGTGCGCGCTTTCCGGGGAGAAAGTATCACCTTCTACGTTTTCTTTTACCAT  
TGTCATTGTTTCTTTCTTTCTTTCTTTTCTTTTCTTTTCTCCATAATCTAAACCTCTCCTC  
GAAGCACACGGTTCCGTCAAAATTCTACGCAACGATTAGAGAAGAAGATTTACGAAG  
ATCGTTCTTTGATTTACTGCATGAAGAATATCAATATCTTTAAATTGATAATATTACGCG  
TATAATTTACATTAAATTTGTGTCGTGATTTCGTATTAATGACAATGGCCACAGAATGGA  
ATCGCAGAAGGGTCTATTCTTTTTTCCGTGTCGGAAGGCTACGTACTGCCGTACCATT  
CGATATTCGTGATTTCGTGTCATGCTCTTTTTTTTTTTTTTTTTTATATTTTTTTTCTTACTTT  
TCTATTACTTTTCTAGCGCTTACGATTAACGATAGTGGAGTGCAAGCAATTCCAAGATTC  
CAGTGAACGATTTCTGTGAGCGATGACGTTAGTGTTTTTTCAGAGCACCAGAGATGTAA  
TTCCATGTCGATGCGTATTATTTACAGCAAGACAGAGCAGAGTAGATTCTTGTGGTGGT  
ATACAAATGTGTATATAAATATTATGTATATATATATATACAAGAGTAGTGATATTTTGTCTA  
ACGGGATGATGCGATGAAGCGAAACACTTGATTATTGATCTCTCTGTGTATTTTCATACG  
TGCGTAATAATACTCGTAAAACGAGAACCTCCGCCTATATATATATATATATATATATAT  
ATATATATATAAAATTCGTAAAATTTCCCATCGTAACGACTACGTTCCGGATATTTTTATT  
ATCATTATATTTTTGGTATATTTGTGTCAGTGAAACAACAATTTTTTCATTCCATCGAATTC  
TCTTTTATTTCTCTCGATTCAATTCTCTAACGACATTTCGCTATGGAGCAACAATTACGTT  
CTTTTTTTTTTCTTTTTTCTTTTTTCTTTGCGCGCTTTTGCCTTAACTATACTATTACTT  
ATATACTCGCGATATAACGTCGTTCCCTCTTCTTCTCGCACGAACAAGATCGACACAAGT  
TTGTCGGCGAAACGTTATGGAAAATCCGATTGATCGAGCCAAGCGTGAGAAAGGTGCA  
GACAGAGAGAGAGAGAGAGAGAGATATGAGCGGACGGAACGATAAAAAAGATAA  
GGAGGAAGGGGGTGAGAAATTAGTCTAGTGAACGGTATCGAAAGATTGTTCTTTTTAA  
ACGCCTGATAGGACGGGATTTGTATTTGCCGACCTGCATGGATAAACAGATTCGTACGA  
TCACGTGGTAATATTCGGGGGAGGAAAAGCTCTGTGCGCAAAAATACGTTTCGTGCAGT  
CAGAGATTCAAGGAAAGAGAGAAAAAGAGAGATCGCACTATGCATCCGTGCTGCACC  
ACCGGGTGGTGTGCTGATCGACGGGGAAACAAGGTTGACTTTATCGTCGGGTAAAGC  
ACGCAAGGGTAGAACGAGCTAGCTACTACCCTTGGCTCGCTCTCTAGGGTGGATGAGG  
AAGAGCACGGTTCGTACCGGAGGAGAGTGGTATCGATTTTGCCGCCGGGAAGATTTGCT  
CGCTCGTCAACTTCCGTGCGGAACTAGATGGCGGAACTTATTTGGGAGGAAAGGGTC  
GCGCGTGAAACGACCTCTTTGGCGTGTTTCGAGGTAATCGGTAAAATCGGTTGTTGTA  
CCATGAGGAAGAAAAAAGAAAAAAGAAAAAAGAAAAAAGAAAAAAGAAAAAAGAAAAA  
GAAATTATATACTTTCGCGAATAATATCACGCATAAAATTGGCTAGAACGATTGTCCCTT  
CGTCGCTTTCTCGGCCAATCCCCTGCGCTCGTTCCCTTCTTCTTCTTCCCTTCGGATGGATCTCC  
GCGGGCGGGCAAGGCGGAACCTCTTGCTCGCATCCAAGACTAGACCATCGGTGTCTG  
CCAATACTTCGCCTCGCACTGTTCCCTCGTGTCTCCTCCGCTCTTTCTTCGCGTGATACTG  
GCTCTTATGGCTGACCAGACTGTTCCCTCGACTTGTAACCTCCTGCCGCACTGGTCGCAGC  
AGAGCGACTGCGGCACGTAAAAATGCGTGTCCGCCAGATGTCTCTGCAGGGACCAGG  
CGCGGGAGAAAGTCTTCTGGCAAAAGCTACAGTAAGTGCCGCTGATCGAGCGGCCCCG  
TGTAATTGAGATCCTGACCCTCGGCCTGTGCCTGTGCCCTTCCGTCGCCACGGACGTGC  
TTCGAGGACGGGGCCTGCGAGTTCCCGTTTTGCATCAACCAGCGAAGATCGGCCGAAC  
GGCACGCTCTCGTTCGTGAGGCGACCGTCTCGGCTGCTGCTGTTGCTGTTGCTGCT  
GTTGCTGTTGCCTGGGCTGCTGGCGCATCTGTTGCCCGTTACCTGGGGCATTGTTATTG  
CAGGCCGAGTCCCGAGTTTCCGACTGCAGATCGATCTGCTCGGTGAGCAAACAGGACT  
CGAGCTCGTCTATCTTGGGCGACAGAGGTTCCGACTTGAGCACGATCTGCATCTGATCG

TTAATGTCGTCTAAGAGATCGATAATGGGTAGGTCCGCAGGATGGTGTGCTGATGCTC  
CTGCATCATCTCGCACTGACTAGTTCCCGTACTATGGCTCGATTGGCCGGTTTGCCGTTG  
ACCGTCTCCGTTGGTAGGGGACTGCCAACCCCGTCCTCCTCGGCGACCTCCCGGTCT  
GCAACCAAAGAGGAGGGGGCTGAGTCCATCGAGATGTTACGCCGGATTAAACCCG  
TGTCGGCCGCGGCACCGATCTCATCTCGGGGGAGGATCTCGCGGTGGTCTTGGTCTCG  
GCGTCGGAAGAAAGGCAACGTGAATTCGAATGAGAGAGAGGAGAGGGGAAAGGCTT  
CGGTTAAATGGATAACGGGCGCGTCGTTAATCGTCGCGCATCGCCGTTAAAAGGAGA  
GAAGAATCGCGGGCGAAAAGACGGAGAAGAGAAGAGGAGAGGAGAGGAGAATAGG  
GGCGGAAAGGAGTATAGGGGTTGAAAGGTGGGCTAAGAGGGAAGAGATAGGGCGAG  
TGTACATTCATCGTCTCGTAAAAGCCGGTACAACGTCCGCGAGTATGAGATGTCGATAC  
AACAACGAGAGAGCAACGGCGGGTAAGAGTAAGGAGCAAGGAGTAAGGAGCAAGAG  
GAGCAAGAGCGGGAACGGCATAACGGCGATGCTTCTTCTTTGCGGGATTTTATCCAGC  
CGGTTACCTTAGCAACCGAACCCCCCACGTACGACGCTCCTTCCCCCGTTTTTCCGTG  
GTGCCGGGAAGGGGATATATACCTAGGATGCGTATTATTCTTAATAACCCCGTATGCCG  
TTGCGCTGTATTATGACTGATGTTGACTCTAAGCGGAGAGCCACGGCGATCGATAGCTC  
GCTACCACCGCGACTATGAAACCGAGAGAGAGAGAGAGAGAGAAAGACAGAGAGAGAG  
AGAGCACGACTAAGGGAGGGCCAAGGGGTTGTAAAGAGGAGAAAGAGAGAGAGAG  
AGTGAGAGAGAAGGGTGGAGGAGGATAGGGCCGAGGGGATCGGCGGGGAGAGAAAA  
ATCTAAGTAGCTTCCGGATTGGTTACGCGAGTCTTACGAACTTTTGAAAGAGTTACGTG  
GACAGTGGTGGGGGCGGAAGAAGCGAGGAGGACGCAACCAAGAACTACCCTCCCCT  
CCGACCACGGCCCTTTTTCCATTCGATGCGGTTGCGCGTTTTCGCGAAATCACCGCGATC  
AAACGATAAGTCTTCCCCGGATATTGGATCGTGTGTATTTAGCCGTTACGGGGAGGAA  
TCGTTTCTGAAACGAGATAAAGAGAGAGAGAGAGAGAAAGGATATAAAGCATATACTCCC  
CCTTCTTTCCCAATTAACCGAATCGAAACGTTTATTAGAGATTCGGGTACAGATCTCTC  
TAGTTCGAGATGCAACGAATCTACGAGTGCAACGACGACGGCCTTTGGAGAGCGCGT  
GACGACGACGACGACGACTATGCTTTCTTCTTCTTTTTTTCTTCTCTCTCTCTC  
TTTTTTATGATACGTCGAATCGCGTTAATCGGTGCGGATAAGAGGAAAAAACGGAGG  
AGGGGAGGAGGAACGAATTCGTTGCGGAGAGAGAGAGAGAGAGAGAGAGAGAGAT  
CGGTGCACGCGCGCTGGTGGAGACTGGCGGCGATGCTCGAACTAAAATGTCTCAATG  
AATTAAGCACCGCAACCAAGTAGAGAGACCTTCACCTTGTCTCGAACCGTGTTACGAG  
ACGCCTCCTCACGGAGATCGCGATTTCGACGCGATACGTAAACAAGTTTCTCGTCCAAA  
TTTCCAATCCTCCTCCCTCCCTCCCTCGACTAATTTTTAACGCGACCTCCGATCGCCGAT  
CGTAACCGGTCTTCGCTCTCCTTTACGTAAACACCTCTCACGAACAACCTCGGCGCG  
TTCGAATCGATCTCGCGATTGAAAAGCGAAAGAAAAGAACAGAAGGGAATGCAACC  
GAGGTATGAAAAGATCGGGACGGGTGAAATTTGTGCGAAGAGGGCGGCATATCGTTTTG  
GAAAGTTGAAAAGAAAAGAGAAAAAGAGGAGAGGAGAGAGGAGAGGAAAAGAGAAGAA  
AAAAAGGAGAGAGAGAGAGATGGAGCGACGACGGCGAACGATATAGAGCGAAAGTG  
TAAACGCCCTCTCTCTTTTCGCTCTCCTGCCCTCCCTCGCGCGTTCTAGCCCCCTTC  
CCTTGTCTCGCTCTTTCGTCCCGTCATATTCTCGTCTCCGTCACACCCGCGCTCACTGTT  
GCGCAGTTTTTCGAGGTCACCTCAAGTTCATCATCGATAATAGCACAAGGCGAAAACAA  
GCAGCTAGACCTGGGCGTCCCCGATAAGTACATACTACAGATAAAAAATTCCATCGGAT  
TTGGTTCAGAGCGAACTTTCGTTTGGCCTTGGGAGGCGCCGCGTACGCGGCCCAAAGT  
AAATTGCCAACGCACGGATCGTTGGCTACCGAAACGAGAGGGACGGCGGCACGGTGG  
TGGAGGGAAGGGGGCAGGAAGGAGAGGGCCGACGGAGGAGAGAGAAAGAAAGAGA

GAAAGAGAGAGAGGGAACGAGCGAGATGAGTAAGTATCGAGTAAATAGACGTATGCA  
AGGAGGACTCGCGGACGTCACGTAAGCAAGAGGCAGACACTTTTGCACACACCATCG  
GAATCGACAACGTCGACAGATGGCAGCATGAATTCCTGTTTTCGCAAACACGGGGCCA  
TTAGCGAGCCCATTACGTAACCCTCCGAATTTCTTCTCTCCTAATTTTTTTTCGACTCCG  
AACCGTTTCCTCCGCCCCGAAAAATCGCCATCCTTCGAATCCTACTCGTCGTCCAACACG  
AGAAGGGAAAAAGAAAGAAAAATGAAAAAAGAAATAAATCCTAGGACCAGAGAGAC  
TAGGAATTTCCCTTCCCTTCCCGTAATCGCGTCGTGGAACGCGCTCTCTCGCAAAAATT  
CGGTCGGCTCGGTAAAGTAGAAAAGAAAAAAGAAAAAAGAAGAGAGAAAAAAGA  
AAGATAGAACGGGGGTGAGAGGGAGAAAGAAGCGGGGAAGGGGCGGAGCGCGGTAT  
GTCCACCGCGCTGGGAAATACGTCCCGTGAAATAAATATTTGCTCGATGCGCTACAACG  
GTTCTCCCTGATACAAAGAGACAGAGAAAGAGGATAAAGTGCTCGACTCCAGAGCCC  
GGCACCCGCTATTTTTATGCGGCCGGGTTTTACAACAGGTTACCGCGGATGCAGGCGTT  
CGCGGAAAAGAGCAGAGAACGAGAGGAAATAAAGGAGGAGAGAGAGAGAGAGGGA  
GAGAGGGAGGAGAAAGAGAAAAAGGAATCGCGACGGTTGCCACTGTCCCGCCCCGCC  
GCCGACACCTCGCGCGCACGGTATCGGGTTTTTTAAACAATTTTAGTGCCGAGCGGG  
AAACGGTGTAGGCTAAGAATATCTAGGCCCCGGGGAAGAATTTCTCCTCTCTTTGCGAT  
AATGACATCGAAACCGGCGAGTGAAACGCGGGCAAAGGGGAGGGGGGAGGGCGGGA  
AGGGGAGCGGGATGAATAGATTTAAAATTAGACCGCGATAAACGCATCTTTCTCCTCC  
CCCCTCCCTCTCCCTCGGCTCCCGCCTCTATGCAACCGATCCTCCTTGAAAAAGTAAAC  
GCATCGATCACGCACACGTACAATTATTTAATTTCAAATGTCACGGTGCGAAATTCATC  
GTCTCGTTTTTTTTTCGGTAAACAACCGAAGCAAATGTGAAAGGTTAACGACACGATCG  
ACCGTATAATTTTCATTGTTTTCGCGCAATTTCTCTCTCTTTTTTTTATATATATATAT  
ATATAGATGTATATATATATATATATATAGAAAAATTCGCGTATTCCTAAAGACAAATTC  
TCGAATAGAAAAAAGATATTACAGAAAATTCGAGCAAATTCGTTCCAACATTTTTTTC  
TTTCCTCTCTCTCTCTCTCTCTCTTTTCGACGCCAAGAACGAATCTGTCTAGAGAAAT  
ACCGCAGACTGCCATATGCTCGCAGCCGGCTCCGTCGGAATAAAAAGATATTAAACCG  
AGAGAGAGAGAGAGAGAGAGAGAGAAAGGAGAGAGAGAGAGAGAGGAGAGCGAAGGA  
ACAAAGAAACTCGTGCGCTCTAAGGCCCCCGATCGTTGCGACAAGTGGTCGTACGTT  
GTACTTTCTATCTGGCACGATTGTTTTTTACGTAACCGGCCATTACGAATCAGAGATGAT  
TAAAGAACGGGCGGAGCGTGCTATTTATTGACAAGAATAAAATTTCACTTTATCGGCGT  
ATATCGAACGATAACGAGCTTTCTAAATTAAATCTACGAGAAGAGAGACTTCTAGACCT  
TGCTCTTTTCCCGATAAAATCACCACTATTAAACCTCACTATCGTCACTATCATTATCGTC  
TCGAGTACTCGACGTACGGGACGGCCTTCTTTCCCAATAGAAAAATATCATCCCGATCG  
AACAGCCCACCACTACTAAGTACAGAGAAATAGAAGGAAAAGAGAGGGAGAATCGA  
AAATCTACTCGCGCCTTTAGCTTTAATTTTAAACGAAACGGTTAAGGCGGAAAGTTTCGC  
GGGACCGACCGACGACCCTGCAATCCTATCTCCCTACGTGCGCTGTTTCGACGTCTGAA  
ACCTTGCCAAAATCGCGTCGTTGCAGTTGGTTGGATCCGAAAGAAAAGAGACAGAGA  
GAGAGAAGAGAGAAAAAAATCGCGAGCGAGCAAACGCGCGCGCGACCGCGATAGA  
TAGGAGACGAGCGCAAGAGCTTCGTCGAGGAATCTCTTGCCGAGATAAAAATGCGA  
AAAAACAAACGGTCGTTTCGCTGCAAATGACCGATTAGAGGAGGTGTCCCTGGCCAGG  
CGTTTTTTTTCTTTCTTTTTTTCTCCTCTCTTTTTTTTTCTTTCTCTCTCTCTTT  
CCCAACCGAGTATAATTTTACGGTCAAGAATGATGAGTATCGTTTTTAATGGCCGTCTC  
TACTCGAGCATTACCGGTCTATTTTCGCACGCCGACCGTAACCGTCCTCCTGCTGTTTCC  
TCGCTCTCGCACGAATGGAGGAAACCTACCATGCGTAAAGAGAAGACAGAGACAGAG

AGAGAGAGAGAGAGAGGGAGAGGGAGAGAGGGCGACGACTTTTTTCGAAAAGAAAAG  
GAGGGGGAGGGTGACGGTGGAGAAAGAGGAGAAGGAGGAGGAGGAGGAGGAGGAG  
GGAGGAGCAGACAGAGAATACAGCGAATTAGGCTGCGGGACGAACAGTTTCGCGGAC  
AAGTATAATTTAATGCGTCTAATGATTCGCAGCGCGCCGTAAAGAACGTGAGTGGCGTA  
CCAAGGTCGTGGTATTTTTAGTTTGGCCAATGTTTAGTTGGCCACGTTTCGTCAGAGAGA  
TAGAGGGACCTTGAATTCGCGGATAACATCTGCGGCCTTATCGACGGCCCCCTGATAAC  
TTTTTCAGTACTAACCTAGTATAAGCCAGCCGTTCAAATATTAAATCGGAGGAGGAGGA  
GGCGACGATTGGCCGCACCTGAATTTACTTAACGATCTTACTTACTACCAGGGCGCGTT  
TGTTAAGAAGAGAAGAAAAGAAAAAAGTAAAAAAGAAACGCCCCGGTCCACTTAC  
GTCTCGATCGGAAAAAAAAAAAAAAAAATAAGAGAAAACACGACACGAATTTCCCTTCT  
CGAATCCCCGAGATTTTTTATATTTTTTTTGTCCACTGGAGGAATCCTATTACCGCACGG  
AGGACTCTCGAGTGATAATCGCGATAAAAAAACGCGTAAAAATTATATTCGCAAAATCG  
TGCGATACGCGTCCGCACGGATCGACGAACGAAAGAAAAGTGAAAGCCTATTGTATTG  
TATTCGCCCTACGGTACGCCGAATCCAAACAAGACCGTACAATCGAAACACGAGCGCG  
TACGTACGCGCCGTATAATCCCAAACATATACAAAGTCGAAACTTCGAAATCGTTTATC  
GTTTATTAAGCGAGCGTTTAAACCCTTCTTTCCTCCTCTCCCTCCCTCTCGCCCCCTTTT  
TCTCCCGATGCGCGCGTTGCGCCACCCCCGAATGTGAACATACGAACGCACGAGTTAC  
GAATAATAAAAAAGAGAAAAAGAGCGAGGAAATTCTTCTCGTTGAAAAACGAGAG  
GAGAAAGAAAGAAAAAGAGAAAGAGAAAGAGAAAGAAGAAGAAAAAGAATAAGTC  
GAGAGATATACCGGAATATAATTTTACCATATGGTACACGCACGTTCGTACCGGGGTCAA  
ATGTCGTTTGAATAAAAAACGTAAAAAAGGAAAAAAGCGTGACAAAACAACGACC  
TATCACATCCTCTTTCGTAATTGGAAACGAGCGGGCTGCAAAAATGTCTCGTGTCAAAA  
CTTCTTCTTTTTTTTTTTTTATAAATTGTAAATTTTACGCACAATTAAATACGGTGATCGA  
TTGTAATCGATTATTGATTACGTCTTGTACAAAATTATAATAAAAAAGGAAATATATGTATA  
TATATACATATATACATTTAAATAAAAATCGATGCGTCGATCGTTTCGCTGTATTTTTTACG  
TATATGTATATATATATATATATATAAATGGTATATAAAATTATAAGCAATATCGTAATG  
CTGGCCGTATCGGCGATATCGCGGTAGCGGCGTGTTTTCCGTTACCAAACGTTAAACGG  
GACGACAGCACTGATATAAAAACTTAAAAGAAGAAGAAAAAAAAAAAAAAAAAGAAA  
AAAACGACGAATTGGACAATATATACGGCACGTATATGAAACGTGGAGTTTTTAAACGA  
GGGATCAATCGTCGATCAAAAAAAAAAAAAAAAAAGAAAAACGACACTTGACGCGACTCGG  
AGAAATTTTAAGAAGCGTTTTTTTAAATAAATTCCTTTTCATTTTGTAAATACTCGGC  
GGAGACAATTTATCATTATCAGGTATTTATCAGACAACAAGGAGAACGACAGTCTGTCA  
CTTCTGCTGTCTTTTCACTGTCGTCTCACTTCTTCTGCGCTTCTTTTCCCTACGTCTTTC  
GTTCTGTTTCGTTCTTTTTTTTTTTTTTTTTTTTATTATAATTAATATTCCTCGATCATTTTCCA  
AGGGGTCTTTTTTCGATTTTTCTTTTTTTTTTTTTTTTCTTTTCTCTTTTCCATCAGAGA  
CCGTGAGATTTGTGGAGATTTTTTTTTTTTTTTTGGCGCAGATACTTTGTACAGTGATGC  
CAAACAGTGATGATTGCATTCATCGCTTGTGCCAATTAGAATGAATCGGATCGAATTC  
GACGACTTCGAAGGAACGAACGTATCCGCTGTATTCCTTTCTTCTTTGCCCCGCCAGTTA  
TCCGCAGTTACACGACGAGCGAGTATATATATCTATCTATAAAACGATATCGATCGATTC  
CGCGATTCCCTCTGTATACGTGTGTGTGTGTACATATACGCGTGTATGTTCTTTTCCCTTCC  
ATTTTGCGCCAAGAAATTCGCGATCACGAAAGAGGAAGATCCGATGGATCAGCAGATA  
AATTCATTCCAGTCGAATCGCGAACGATCGATCCGCGATTGATAATCGCTCGAACGAGT  
TGTTATGACATTCGAATGAAATGTGTATGCAAGGCGAATTCGAATAAATGGTATTTTCAT  
AAATGATGATATCGATGATTTTTTTGTAAACGCATGCTTAATTAGAAGAGGTTTTTAATC



GTCCAAGCAGACAAGTAATGCTCTTTCACCGCAACCAAATAAAAAAAAAAATAAATAAA  
TATATATATATATATAAAATATGTGTGTATGTATGTATGTATGTATGCAATATATATATATGGT  
ATATACCTATATTCTTATACAATATTTTATATGATTTTTTTGTTAGTGTGTGATATAACTGCA  
CAAGTCCTTCTTTTTTCTTTTTTTTTTTTTTTTAGTTACTTTTTTTTTCTTTCTTTCTTTT  
TTTTTTTTTTTTTTTTTTTTTTAATTCAAGAGCGAACACCGCCACACCGCGGGCAATT  
GCGGGCCACGATGTGATCGACCGTGATGCGATCGATACAAGAGACATGTAATGTAATAT  
AATATAATGGAACACAGCATAGAAGAAGAGTTTGCCCTTTTTTTTCTTTTTTCTTTTTT  
TTTTTTTTTTTTTGGTGAAAAATCAAAAGAAATCAAGCTTGTTCAAGTCAACATCCCCGA  
TCAACAAATCGGAAATCGGTAAAAAACTCGTTCAAATAATCACGAGAACGCGCATAT  
ATAGAACAAGTATACATATATATACACAGGGGGAGAGGGGCGGGGGTTGTGTTCCAACT  
CGTGTTCCCTCGAGTTCCTCGATCTCGTTGATTCTAATGATTTTACATTACAGGGCAGAG  
CCAG

>novel\_circ\_001727

GTGAATAGATATAACGATGGTAGATACGCAACACTTTTGTCTGCGATGGAACAATTACC  
AAAGCAGTATAACGTCGGCATTGAGAACTTGAGGGACGATGAGGATTTTGTGGACGT  
CACATTGGCCTGCGATGGCAGAAGCCTCAAAGCGCACCGCGTCGTACTTTCCGCTTGC  
AGCCCCATTTTAGAGAATTGCTCAAGAGCACACCGTGTAACACCCGGTGATAGTACT  
TCAGGACGTAGCGTTCAGCGACTTGACACGCATTGGTCGAGTTCATCTATCACGGGGAG  
GTGAACGTGCATCAGCGTTCCTTAGCAGTTTTTTGAAGACTGCCGAAGTCCTCAGGG  
TATCGGGGCTTACGCAACAGGCAGACCAAACGGACAGGGACGAGCTGTCCACGTGC  
GCGCGTTGGCCGCCGGCGGGAATCACCTTCCTTTCCACGAGAAATTGGAGGAGAGTTT  
TCCCAGGGGTGGCTCGCCACCGACGCCTGTCACCCCGACACCGACCACCGTGCAGCA  
ATTGTTGCGCAGAGCGCAGATACGCAGGAACGAGAGACGGACGCCCCGATCCCCACGA  
TGAGACGGCGAAGAAGCCGAGGGTGCTGTGCCTCCGCTCAACAACAACGACGCTAC  
GCCACCGATTTCTCGATGGGGGTGAAGAACAACACGTGTCGAGCAAGGTGGAGGG  
GAACGGGGTCCACGAGGAGAACAGCCCCCTCGAGGACAATATCAAGTGCGAGCCGTT  
GGAGCTGACAGGTGGCAACAGCGGTAACGCGGGCGGGGAACAACGAGGACTCGTCGG  
ATTCCGGCGCGGCGGCGTCCGATCGGCCGCCCGCGTCGGCGAGCAGTAACGAGCACG  
AGGCCGAGTCCGAGCACACGTCCACCCCCAATTTTTGTCCGAGACGAAAATCTTCCC  
GCCACGCCGGGAAGCTTTAATTTCAGTATGGCGGCGCTGGCCACGGAGCATAACCG  
TTGTCAGTGAAATTTCCAGGAATGGGCCACGGGTGCAACCACCGGACTTGGCAGGA  
ACTTCGCAAG

>novel\_circ\_001728

GTGAATAGATATAACGATGGTAGATACGCAACACTTTTGTCTGCGATGGAACAATTACC  
AAAGCAGTATAACGTCGGCATTGAGAACTTGAGGGACGATGAGGATTTTGTGGACGT  
CACATTGGCCTGCGATGGCAGAAGCCTCAAAGCGCACCGCGTCGTACTTTCCGCTTGC  
AGCCCCATTTTAGAGAATTGCTCAAGAGCACACCGTGTAACACCCGGTGATAGTACT  
TCAGGACGTAGCGTTCAGCGACTTGACACGCATTGGTCGAGTTCATCTATCACGGGGAG  
GTGAACGTGCATCAGCGTTCCTTAGCAGTTTTTTGAAGACTGCCGAAGTCCTCAGGG  
TATCGGGGCTTACGCAACAGGCAGACCAAACGGACAGGGACGAGCTGTCCACGTGC  
GCGCGTTGGCCGCCGGCGGGAATCACCTTCCTTTCCACGAGAAATTGGAGGAGAGTTT  
TCCCAGGGGTGGCTCGCCACCGACGCCTGTCACCCCGACACCGACCACCGTGCAGCA

```
>novel circ 001729
```

```
>novel circ 001730
```

```
>novel circ 001732
```

ACGTGGCGGCCTCGGTGGAGGTTCACTTCGAGAACAAAGATGGCGGATTTTTCCTGAA  
GCACATACCGAGGCAGTACTATCCCGTGAGGGGGGACTCGATCTCTGCGATATCCCCGT  
CGACGGGGACGCTGTCTGAACAACGGGGGGGGCCCCGTCGCCTGCACCGGGCTCGGTCC  
TCTCCATAGACAAATTACCGTGTTTCAGACGAGCGAGCCCGTCTCGGTGCGGGCCAC  
TTACGGCCCATTTAGCACGAAGCAAACCGTGCCCCGCCGTTACATAGTGCCGGATCCAT  
TGGACGCGCTCCCCGGCCCGGAAACGAGGCGGAATCTCACGGCTGCGACGATTCTGG  
ACGCGCAGGAGCTGGGCGCCCGTCACCTGGACATGTCCGCCCATCTGGTTCGGGAGCA  
GCGTGCCTCGCGACTCGCCCGTGCTCAGAGTCCTGTTCCACGCCGGAAGCGAGGCGG  
GCGGAAGGCGCCAGTTGCTCCTTGCCCGCCATCAGAGAGTGTGCGTGGTTCCTTCACGC  
GAGCCTTGCCGCCCCGTCGAGGAGCACCGTTAACAGGAACAACGGGAGGGCTTACTC  
CTCTTCGTCTTCCCCATCCTCCTCCTCCTCCTCCTCCTCCGCTTCCTCCTTCTCGAG  
CTCGTCGTCCACTTCCGCTCTAACGGCAGCGTGACGCCCCGACGGGGAGAACGGAGT  
TTGCCTGGCGCAGATCACCATACCCGCCGATTGGTGGGCACCGTTACCAACCGCCGGAC

GCTTCCGGCCGGGTCAAGGTCGCCAAGAGCCTGCCCAGGCTCGTGCAGGTCGCCTACT  
CCGTGCTCGAGCCACGCACGGAGGAGGCAGGCTCGGCCGACAACGGGGCAGGCTTCT  
GCAGGCCGAGGGTCCAGATCCAACCCGTACGCCGCTCGGTACAGGTGCCCCCTCGCTCC  
GAACCGGGCCGATTACAAGGAGCTCAAGGCCGACGATTGCTCACTCTTCTGGTGCCG  
CACGGCCCCCTCTACCCGAGGTCCCGGCTGCACGTCCCGGCGTTCCTTCATCCGTCCA  
AGACCACCGATCCGAGGCAGGAGAGGGCACCAGCTCGTCATCGCAGTATACCTTAG

>novel\_circ\_001733

ACGTGGCGGCCTCGGTGGAGGTTCACTTCGAGAACAAGATGGCGGATTTTTCCTGAA  
GCACATACCGAGGCAGTACTATCCCGTGAGGGGGGACTCGATCTCTGCGATATCCCCGT  
CGACGGGGACGCTGTGCAACAACGGGGGGGCCCCGTGCGCTGCACCGGGCTCGGTCC  
TCTCCATAGACAAATTCACCGTGTTTCAGACGAGCGAGCCCGTCTCGGTGCGGGCCAC  
TTACGGCCCATTTAGCACGAAGCAAACCGTGCCCGCCCGTTACATAGTGCCGGATCCAT  
TGGACGCGCTCCCCGGCCCGGAAACGAGGCGGAATCTCACGGCTGCGACGATTCTGG  
ACGCGCAGGAGCTGGGCGCCCGTCACCTGGACATGTCCGCCCATCTGGTCGGGAGCA  
GCGTGCCTCGCGACTCGCCCGTGCTCAGAGTCCTGTTCCACGCCGGAAGCGAGGCGG  
GCGGAAGGCGCCAGTTGCTCCTTGCCCGCCATCAGAGAGTGTGCGTGGTCTTCACGC  
GAGCCTTGCCGCCCCGTGAGGAGACCCGTTAACAGGAACAACGGGAGGGCTTACTC  
CTCTTCGTCTTCCCCATCCTCCTCCTCCTCCTCCTCCTCCTCCGCTTCCTCCTTCTCGAG  
CTCGTCGTCCACTTCCGCTCTAACGGCAGCGTGCAGCCCCGACGGGGAGAACGGAGT  
TTGCCTGGCGCAGATACCATAACCCGCCGATTGGTGGGCACCGTTACCACCGCCGGAC  
GCTTCCGGCCGGGTCAAGGTCGCCAAGAGCCTGCCCAGGCTCGTGCAGGTCGCCTACT  
CCGTGCTCGAGCCACGCACGGAGGAGGCAGGCTCGGCCGACAACGGGGCAGGCTTCT  
GCAGGCCGAGGGTCCAGATCCAACCCGTACGCCGCTCGGTACAGGTGCCCCCTCGCTCC  
GAACCGGGCCGATTACAAGGAGCTCAAGGCCGACGATTGCTCACTCTTCTGGTGCCG  
CACGGCCCCCTCTACCCGAGGTCCCGGCTGCACGTCCCGGCGTTCCTTCATCCGTCCA  
AGACCACCGATCCGAGGCAGGAGAGGGCACCAGCTCGTCATCGCAGTATACCTTAGGGC  
CAGGGTGAAATCCGGCGTGAAATCTTGACGCATCGTCCAGCAACCCGGACTGGATC  
GTCGACAGCAAGATCAACGCGAAGAACACGATCGCTACGTTACCGCGAGGCGAAAG  
GAGAATGCCTCCCGATTACCAAGCGC

>novel\_circ\_001734

ACGTGGCGGCCTCGGTGGAGGTTCACTTCGAGAACAAGATGGCGGATTTTTCCTGAA  
GCACATACCGAGGCAGTACTATCCCGTGAGGGGGGACTCGATCTCTGCGATATCCCCGT  
CGACGGGGACGCTGTGCAACAACGGGGGGGCCCCGTGCGCTGCACCGGGCTCGGTCC  
TCTCCATAGACAAATTCACCGTGTTTCAGACGAGCGAGCCCGTCTCGGTGCGGGCCAC  
TTACGGCCCATTTAGCACGAAGCAAACCGTGCCCGCCCGTTACATAGTGCCGGATCCAT  
TGGACGCGCTCCCCGGCCCGGAAACGAGGCGGAATCTCACGGCTGCGACGATTCTGG  
ACGCGCAGGAGCTGGGCGCCCGTCACCTGGACATGTCCGCCCATCTGGTCGGGAGCA  
GCGTGCCTCGCGACTCGCCCGTGCTCAGAGTCCTGTTCCACGCCGGAAGCGAGGCGG  
GCGGAAGGCGCCAGTTGCTCCTTGCCCGCCATCAGAGAGTGTGCGTGGTCTTCACGC  
GAGCCTTGCCGCCCCGTGAGGAGACCCGTTAACAGGAACAACGGGAGGGCTTACTC  
CTCTTCGTCTTCCCCATCCTCCTCCTCCTCCTCCTCCTCCTCCGCTTCCTCCTTCTCGAG  
CTCGTCGTCCACTTCCGCTCTAACGGCAGCGTGCAGCCCCGACGGGGAGAACGGAGT

TTGCCTGGCGCAGATCACCATACCCGCCGATTGGTGGGCACCGTTACCACCGCCGGAC  
GCTTCCGGCCGGGTCAAGGTCGCCAAGAGCCTGCCCAGGCTCGTGCAGGTCGCCTACT  
CCGTGCTCGAGCCACGCACGGAGGAGGCAGGCTCGGCCGACAACGGGGCAGGCTTCT  
GCAGGCCGAGGGTCCAGATCCAACCCGTCACGCCGCTCGGTCAGGTGCCCCCTCGCTCC  
GAACCGGGCCGATTACAAGGAGCTCAAGGCCGACGATTTCGCTCACTCTTCTGGTGCCG  
CACGGCCCCCTCTACCCGAGGTCCCGGCTGCACGTCCCGGCGTTTCCTTCATCCGTCCA  
AGACCACCGATCCGAGGCAGGAGAGGGGCACCGCTCGTCATCGCAGTATACCTTAGGGC  
CAGGGTGAAATCCGGCGTGAAAATCTTGGACGCATCGTCCAGCAACCCGGACTGGATC  
GTCGACAGCAAGATCAACGCGAAGAACACGATCGCTACGTTCACCGCGAGGCGAAAG  
GAGAATGCCTCCCGATTACCAAGCGCATCGGCCGAGGAGATCCTGACGATGCTTCTCG  
AGGCGAGCGAGGAGGGGATGGAGGGGAATTGGGACGGTGGTCGGATCGTGTGGAGC  
GTGCGTTACGCTTTCGACAACGGGTCCCTGTTGAACGGGATGGATCAGCTGCAGCAGA  
GATTGCAGCAGAGGCAGATGCAGCAACATCATCATCATCACGCCGAGAGGCGGAA  
GCTCCAGGTTTCGTCTTGAGATACAGAAGGACGATATACAGGCTGTCCTGCCTATATCCA  
AG

>novel\_circ\_001735

ATCGGCGGAGGAGATCCTGACGATGCTTCTCGAGGCGAGCGAGGAGGGGATGGAGGG  
GAATTGGGACGGTGGTTCGGATCGTGTGGAGCGTGCGTTACGCTTTCGACAACGGGTCC  
CTGTTGAACGGGATGGATCAGCTGCAGCAGAGATTGCAGCAGAGGCAGATGCAGCAA  
CATCATCATCATCATCACGCCGAGAGGCGGAAGCTCCAGGTTTCGTCTTGAGATACAGA  
AGGACGATATACAGGCTGTCCTGCCTATATCCAAG

>novel\_circ\_001736

AACTGGGAGGTGATGAACACGGCGGTGTTGACCGGGCGGCAAGTGTCGACGGGGATG  
AAGGTGTTTCATCGTGAGCCAAGCGGGAACCGTGGCCGACGTCACGCTGCAATCCTCCT  
GCCACTCGGAGGACGAGAGTGTTCTCAAGGTGTCGTCCTCGTGTAGCAGCGTGACGT  
GGACGGAACGGAGATACGGGGCTCGAGCAACGCTTCCGTCCTCGTCAAATACGGCAC  
GTACACGGGCCTGGCTAAATTCACAGTTTGGATGCCGGAATTCCCTTTGGAGATGACC  
GTGGCAGATACGAGATTGAGCCAGATCAAAGGGTGGAAAGTGGCCGAGGAGCACGTA  
GCCGGGGCGAAGAGCAAACGCAGTTTGAACCTCGACGTTCTCGCGGCCGACGAGCCG  
ATCCCCCCCCCTCCCCAGGACGAGAAAGAGGAGCGCCGCGGAATTGGAGGACACCTCG  
ATGGATATCGAGGACGCGGACGTGATCTTGGAGGAGGACGAGCAGGAGGAGAGATTT  
CGTGGGAACGATAACTGGGATGCTATTAACCTCATCGACAGGGGGGCCGTCGACCAATT  
GCAGGCTCCGTTTCCAGCAGAGCCCCGGTCGAGGTGCACGCGAGATTCCTGGCCACCG  
ACCACGATTCGGGCCGAGTATCCTATTTTCGTGAATCGTCGAACTTGGCTACGAGTGACC  
GATCTGGTGAACGGGATGCTCCGGGTTTCGGATCCAAGGATCGCCGACCTGTTGCAGG  
GAAGGATCGTGCAGGGTCGTGGGGTGGGGAGGACGGAAGTGCAGGTTCTTTCGCCGA  
TCACGAGCAAAGTGATCGGCGCGAAGGAAGTGCGAGTGGGCAACGATCGAGTGGCGA  
TCACCAGGTTGTCCGTCAGAGTGGTGTCCGGTTTACAACCTGACCATCAGCCCCGATAC  
CGCTATAGAGAATGGATACGTGGCGGAAACGTCGGTCACGAGGAAGTTGACCGCTCAA  
TATCAGGAGGGTCTGTTGGATATAGACGTGGAATTCTCGGACGGTACGAGAACACCGC  
TGAGAGAGATCGCCGTGAACGACTATCATTTGTTGGTGGAGAGTTTAGATCCGGAAGT  
GGTGGCGTTCGCCCCGATGGTCGCCTCTCATCATCCGCGAGTGATCGCAGTGGGCGAG

GGGCGAGGCGATTTGTTACGGGTCACTTCAACTGGCGGATGCCTGCCGCCTGACCG  
GCAGGAGGTCCGGGAAGGTGTCTCAAAGGGCGACCGCCGCCACCCTCGCCACCGCTT  
CAGCCAACGTCGAGGTGGACTTCGCCTCGAGCGATCTCCCCAACCGACCCGAATTTCGT  
GCAGAACGACGGAGGCGGAACGGTTCGGCTCCCATCATCACAGGGAGAGGAAGACAA  
GCAGGGGAGAGATGGCGCCCCGATTTGCACGACATCTTAATCG

>novel\_circ\_001737

ATCTAGAAAACAGCTGGCACGAGCGAAGGTCACCGGCCATGGAATATAATTAGTCCGA  
CACTTATGGAACGTCAGGCCAGCTATGGTTCGCAGTGGCCGCAACGAGGTAGACGAGG  
TAGTGGTCTAGGCACCTTGGAGATCGGCCTTTGCTCGACACGTGTGCCCATGGACAACG  
TTATTTTCCTTCTCGAATACTGGGTCTTGGTCCGAATCGTATGCCACTCGCACCGCCATA  
AAAGGAACGATCGGGAAATGGGCAGCTGATGATCAATATGATCGGGGGGGGAAGGGA  
AAAAAATATTTCAAGAGTAATCGGCTATTTTTCAGAAGAAGCAGAACTTCCTAGCGA  
ACCTCCTCTCTCTCCTCCATTATGGTATTAACTCGGGACTACACTCGGGATGGATCGATC  
ATTCAAGGAAGCCTTGGACGAATCTGTGGATTTTCCAAATAGGAGGCAACCGATGGTG  
AGACTACGTGGTAATTGCGACAGTTGTAATTACCAGTGTATTAACCGTTGCAAATGTCG  
AAAGAGCCAACCTCGAGCCCGCAAGGTTTCCCCCGTAAATAGGGGAAGAAGATTGTC  
CAATTAAGTGTCTCGTTTAATTGAATCTTATTTTCCTTTTCACTTGGTCCAGTTTCATTGGG  
GCTTCTGCGCTTTATCGCGTGAGTCGAATGTAATGCACAGCGAGGTCGGAAGCTTGGC  
CGAAGAACAACCCACGACAAAAGAGGGATCGAGTTGAACGTCGCGGGATATTTTTTGG  
CCATACTCCCGCCCACTCCAGCCTTCGACAGCTCGCAAATTGTCGTCGTCGAGTGGCG  
CGTGAATATCGTGGAACGGACTACCGTTCTACTCGTTTAATGCCCGTTTAGGCGCGCA  
GGGTATTCTTTCAAATTTTTTTTCAGACAATTCGTTTTGCTGCCGGTGGAACGAGGAAGA  
GGAGCAAGGGATGAAGATGGAGGTGGGAGGGGGTGGGAGAGAGCTCGAGGAGAGAA  
AGGAGGATAGGAAGGAGCAATTCCTCGGGACGAGACGAGACGGGACGAGACGAGAC  
GAGACGAGACGGAGGTGAAGGTATTCTTTTAAAGCGGAACACTTTACTGCTGCTCGT  
TCCACGCTGGTAATGGAGAATCCCCCAGCCGCCCAACGAATTAATTGCGGGGCTAACG  
CCGAGACACTCCCCGATATCGAGTCACTTCGTTCCACGGGCCAGT

>novel\_circ\_001738

ATCTAGAAAACAGCTGGCACGAGCGAAGGTCACCGGCCATGGAATATAATTAGTCCGA  
CACTTATGGAACGTCAGGCCAGCTATGGTTCGCAGTGGCCGCAACGAGGTAGACGAGG  
TAGTGGTCTAGGCACCTTGGAGATCGGCCTTTGCTCGACACGTGTGCCCATGGACAACG  
TTATTTTCCTTCTCGAATACTGGGTCTTGGTCCGAATCGTATGCCACTCGCACCGCCATA  
AAAGGAACGATCGGGAAATGGGCAGCTGATGATCAATATGATCGGGGGGGGAAGGGA  
AAAAAATATTTCAAGAGTAATCGGCTATTTTTCAGAAGAAGCAGAACTTCCTAGCGA  
ACCTCCTCTCTCTCCTCCATTATGGTATTAACTCGGGACTACACTCGGGATGGATCGATC  
ATTCAAGGAAGCCTTGGACGAATCTGTGGATTTTCCAAATAGGAGGCAACCGATGGTG  
AGACTACGTG

>novel\_circ\_001739

ATCTAGAAAACAGCTGGCACGAGCGAAGGTCACCGGCCATGGAATATAATTAGTCCGA  
CACTTATGGAACGTCAGGCCAGCTATGGTTCGCAGTGGCCGCAACGAGGTAGACGAGG  
TAGTGGTCTAGGCACCTTGGAGATCGGCCTTTGCTCGACACGTGTGCCCATGGACAACG

TTATTTCTTCTCGAATACTGGGTCCTTGGTCCGAATCGTATGCCACTCGCACCGCCATA  
AAAGGAACGATCGGGAAATGGGCAGCTGATGATCAATATGATCGGGGGGGGAAGGGA  
AAAAAATATTTCAAGAGTAATCGGCTATTTTTCAGAAGAAGCAGAACTTCCTAGCGA  
ACCTCCTCTCTCTCCTCCATTATGGTATTAACCTCGGGACTACACTCGGGATGGATCGATC  
ATTCAAGGAAGCCTTGGACGAATCTGTGGATTTTCCAAATAGGAGGCAACCGATG

>novel\_circ\_001740

GTTCTGCGATATTAATTTAACTCATCATCATTTTTCTGGGACGAAGTTTAACGAAGTTACG  
AGCAACAGGCTGACGAAAGTTTAAGGATCGCTATCGGAGAGCAGAGTTTGGAAGTTC  
GTTTCGAGGAAAAAAAAAAGGGAAAAGGGAAATCTCTTCGTCCAATCCTTGAAAAAT  
TTCTCTCGCTCGAATACACTTTCGCTGAAAGAACTGCGAGAAAAACTTTTATTAACGGC  
TACACAATTTGTTGCACGTCCACCGTCTCTGGCACGTGGCTATATAATAACCAACAAAC  
GAATCCTCTCACCTCTTGTCTACACTAGTCGCTTGTCTGACTCGAAAAAAAAAACTTCT  
TTTCCCATTTTTTTTCTTTTTTTTTTGCCATCTCATCGGAGAGAATTAAGTTAAACGAAAA  
CTCTCGTACTCGGCAAAGTATATCGAGATAACGGCTGGCAAATAATTAATCCACGTGG  
CAAACGAGCCATCTTTTACGACGCAACTGCTCGTCAAATTGATGTAAACGTCGTCATCG  
TGATCTCGAAATAGCGAGACGAAGACACGAGCGAGGCACTGTGTGGATCGTCACTGT  
GGTTGACGACGATTAGAGAATCGAGTTATTCGATTTTTTTTGAAAGGGATAGAAGAAC  
GAATATTCGATAAAGATCGATAAAGAAAGAAAGGAAAAGGAAAAGCGGAAGAGATCA  
GGTATTGATCGAGCGGTGGTGTGATCAAATTCGGGACGATTTTACGAGGTAAACCAA  
GTCACATTTTGCTCATCAACACTGAGTGGTTCCAATTGACGGTCGGGTCGACCCTCCA  
GCGTAGACACTATTGGTCAGCCTTTTAATACAGGCGGTTCGCGATTGGATCAGATACCAA  
GATCGTTCTTAGACGGAAGGCATCGCTGGAGCGGATTTCGGTACAAAACTTTAAACGTC  
GCCAGTGTGCGCAATTTGCTGCCTGCCGTCGTCGTCGCAAGGGTCACACAGATCC  
ACAAGAGACATTCGCACATCCAGTTTGTCTCAGTCGGTTTAAGTCGGTCAACGATTGC  
GCCGAGCTTGTAAGATAATCAACCAGAGCATATACAGAAGGAAAGAATTGGAAATC  
AGGAAATCGAAACCGTTTTTTTCGTGCTCTGCTCACTATCTTCGAAAGAAGATATTCTATT  
CTCAAATCGTTGGAAAAAGAGGGGAAAAAGAAAGGACAATCGAAGGAAATAATCGAA  
TCCCAACGTTTGATAACTCGAACAACATCGTGGAAGTTTCGATTGACCAGTTGAATG  
GCTCATATTTATTGGCTCTTATTATTCGAAAGATCTTGATCGTTACGTTGCACTGCCTACT  
TGGAAGAAAGGAGAATCGAGCTTAGAGAGGAGATTTCGTGTTTTTTTTTTTAAAGTAGT  
ACGACGACGAAGAAGACATTTCTGGCTGACTTCTTCGCGAGACTCGACTTTCCTTAGG  
GTGGAAGAAAGTTTGAGGAACATCGAGGAACGAAACAAATCCCATTTGGTTTTACGCC  
ACGAAGCCTCGTTTTTCCCCCCCCTTCTGGATCAGGTTTATCTTTCCGTCGGCATCATGG  
AACGAAGGATCCTGAAAATGTGGTGACGACGTGATAGGCGAAGGCCTTCGATTATCGA  
GACACTATCAAGTGGTGTGAGCCATAGTCGTTAGAAAGAAAATATATTTTACGTGACA  
CCCTCCCCAAGTTAAGAGCGACAATCGTTTTTAAACGTATAATATATACATATACATATA  
CATATATATATATAAAAAAAAAAGAAACGAATTTTTATCGAGAATAATAAAATAGAAATA  
GAATTTCTAGAATTCAAATCCTGATCTAAGTTTCATCTTAACCTAACAAGTGACAAACCT  
CCATCCCATCGGACATTTTTTAAATATATTCGGATAATCGAGAATAATATAATAGGAAGAA  
GAGAGAAAGAGTGAGAGAGAGAGAGAGGAAGAGAGAGAGAGAGAGAGGGAGAGA  
GAGAAAAAGAGTAAGAAATAGCCGCCGTTCTTTCGCGAAACTCGTAGATTTTCAAGAG  
AAAAAATAGTGACAAAATGCGTTGCAGCCAAGGTGTGGCGATGGTATTCGAGGACGC  
GTTTCGTCTTTTTTCGCGGTTTCTTTCCCTTAAGTCACGGGGTTGCGCACTCCTAGAAA

CGCATCGGCAACGCGAAACAACCTGGCATCAAGAAATTGTACAATAGCTTCTTCGTAAT  
GTTCTAAGGATAACTCTTCCTTAAGGAAGTTCGGCCCTTTATTAACCGGTGGTCGAGTG  
ATGCACCGTGCACCTCCGAGATCATTGTTCGATCCCGATCGAGGAAAATACGCGGAGAA  
AACGCACAAAAGAAGGAGGACGTTTTTGGTTAGTAAACGAAAGAAAAGGAACGAGCT  
GAGCGGAGGAAGCCGAGAAGCGGCGAAAACAAAGAGGAAAAAAAAAAGAAAAAA  
ATAGAAAAAGGGGAAAGGACTGGAAAGGAAAATTATCCGATGTGACTGAAGAATGTT  
ACGTTAATGTTTAGAAAAGGAGAAGTCCCTAAGTCCCTTAAGTTGATGCTAAGAAATTT  
CATCGTGGACGTTCTAACTAGAACTTGTAGAACTGGACTTATAGCCTTCTCTTCCAAAA  
CGGGCCACCAAAGCGTTCTCCAAAGAATCTTTGAGCACTCTCTGAACTTGGTAAGGGC  
GAATAATATAATCGTGATTAGGATCAAAACAATTGGTATTCGAAAAGGTAGTAGTGTGT  
AGTAGCCTGAAAAGTAGAAAGCCTAACACGAGTGCTTCGAGATTTAAAGTCGTTGAA  
TGGAGCTCCAATTCATCATGGACGGCAGTGCAGATGCTTTGAATGGAACGATATGGTTT  
CCCAATACACCGTCACCTCCGTACGAACAGCTGTCCCCAGTTCGTCAGAACAGATGTG  
ATCCCATCGCCACTCAACACGCGATGGGATATCACAGTGCAGAAAATTCTTTACGGCAG  
GATAAATACAACCTACCGAAGGATTCCCCGGAGGACGGTGTCCAAATACGTTTCGAGCA  
GCGAATCGCCCCAACATCTCAGCCCGTCTTCGACAATTCCCCCAATTGCCAGCAGAG  
CACCTGAAACGTCGAGCCGGAGAGCCGTTGTGCGCAAATTACAGAACTCGAGAAGAA  
GCATGCCAAGAGAGATG

>novel\_circ\_001741

GGAACGAACTATGGATTATTATGGAGTACTTGGGTGGCGGCTCGGCCCTGGACTTGAT  
GAAGGCCGGTAACTTCGAGGAAATGCATATCGCGGTGATATTGCGCGAGGTGCTCAAA  
GGGTTGGATTATCTTCACAGCGAACGGAAGCTCCATCGCGATATTAAAGCGGCGAACG  
TTTTGCTGAGCGAGATGGGCGACGTCAAGTTGGCCGATTTTGGCGTTGCCGGACAGTT  
GACCAACACGACCAGCAAACGGAACACTTTCGTCGGGACGCCGTTCTGGATGGCACC  
GGAAGTCATCAAGCAAGCTTCCTACGATTCCAAGGCTGACATTTGGTCGCTAGGCATC  
ACGGCGATCGAATTGGCCAAGGGAGAACCGCCGAACAGCGAGCTGCATCCTATGAGG  
GTCCTGTTTCTCATACCGAAGAACAATCCGCCCAATTAACCGGAAATTATACCAAGCA  
ATTCAAGGAGTTCGTCGAGGCCTGCCTCAACAAGGACCCTGAAAACAGGCCGACGGC  
GAAAGAACTATTGAAGTTCCAGTTCATCAGGAAGGCGAAGAAAAACTCGTACCTGATC  
GACCTCATAGACAGATACAAAAAGTGGAAGTCGCAGAGAAGCGAGGAATCCGAGACG  
GAGAGCGAAAATTCGGAICTCGGAAGAGTCGAAGCAGGATAGCGACATGGACGATCCA  
TGGATAATGACGGTGAAAGGTCCACACGTGGTCAAAGGTCCCGTGGTTCTATGCTGC  
CGTTGGACGAGCAGCCACCCTCGTTGACCCTCACACACACGCCGAATCACAGATCGGC  
GAATCACAATCAACAAGCGAAGCCACACGCGAACGGTACCTCGAGATCTCCGCCAAA  
CGATTCCACGTTGAATCATTACAGGAGCGAGTCGAGGGATTTCGGTTCGCGATGGCCAA  
GCGAAGCATAACGCCGTCCCGACCGCACGAGGCTGCGCCACCGCCGCCCGTGGACACG  
CGAGAAAAACGAGAGGACTACCGGGATTTCAATCGGGATTCTTCGTTGAGGGAATTGA  
AGGAGATGCGCGAGAGCAGGGAGAGCAGGGACAGGGAGCGGGACAGAGAAGGGCG  
GGAAAGGGAAAGAGACAGAGAAAGGGAGTTTAGCGCGAAAGAGAAGAGGAACAGT  
AAACCGGACGTACCTGTCGTACCTATGGTGGACCATAGGCCCGGTGAAGACAAGCAGA  
GGCCAAGGAGCTCGCAGGAACTGAAGCATTCTCGAAGCGCGGCCCTTTCCGGTGTTG  
TTTTACCTCTCTGTCCGAGCTTCAAAGGAAACATCAATATTCGGCAAGAGACAATAAT  
GGTGAAGGCGGAAGCGGCATTGGCAAGAACGGAGGCGCGATAGAGGAACCTGCGCAG

CGCGTTCGAAACAGCGGAACGCACCTCGCCGGGAATGACCGAGGCCCTTATCAGGGA  
ACTCCTCAAGTCTTTACTTCCTGCCAATCATTCGGAGGGTTGCCTGTTTCATGCTGATGG  
AAAAAGTTATCCTGAG

>novel\_circ\_001742

AAGGTGGACCCCGAGCTGATATTCACGAAACAAGAACGAATTGGGAAGGGTAGTTTC  
GGAGAGGTGTTCAAAGGCATCGACAATAGGACCCAGCAGGTTGTCGCCATCAAGATCA  
TCGATCTCGAGGAGGCGGAGGATGAGATCGAGGATATACAGCAGGAGATCATGGTGCT  
GTCTCAATGCGACAGCCCATACGTCACCAAGTATTACGGGTCCTATCTCAAGGGAACG  
AAACTATGGATTATTATGGAGTACTTGGGTGGCGGCTCGGCCCTGGACTTGATGAAGGC  
CGGTAACCTTCGAGGAAATGCATATCGCGGTGATATTGCGCGAGGTGCTCAAAGGGTTG  
GATTATCTTCACAGCGAACGGAAGCTCCATCGCGATATTAAAGCGGCGAACGTTTTGCT  
GAGCGAGATGGGCGACGTCAAGTTGGCCGATTTTGGCGTTGCCGGACAGTTGACCAA  
CACGACCAGCAAACGGAACACTTTTCGTCGGGACGCCGTTCTGGATGGCACCAGGAAGT  
CATCAAGCAAGCTTCCTACGATTCCAAGGCTGACATTGGTCGCTAGGCATCACGGCGA  
TCGAATTGGCCAAGGGAGAACCGCCGAACAGCGAGCTGCATCCTATGAGGGTCCTGTT  
TCTCATACCGAAGAACAATCCGCCCCAATTAACCGGAAATTATACCAAGCAATTCAAGG  
AGTTCGTCGAGGCCTGCCTCAACAAGGACCTGAAAACAGGCCGACGGCGAAAGAA  
CTATTGAAGTTCCAGTTCATCAGGAAGGCGAAGAAAACTCGTACCTGATCGACCTCA  
TAGACAGATACAAAAGTGGAAGTCGCAGAGAAGCGAGGAATCCGAGACGGAGAGC  
GAAAATTCGGACTCGGAAGAGTCGAAGCAGGATAGCGACATGGACGATCCATGGATAA  
TGACGGTGAAAGGTCCACACGTGGTCAAAGGTCCCGTGGTTCCTATGCTGCCGTTGGA  
CGAGCAGCCACCCTCGTTGACCCTCACACACACGCCGAATCACAGATCGGCGAATCAC  
AATCAACAAGCGAAGCCACACGCGAACGGTACCTCGAGATCTCCGCCAAACGATTCC  
ACGTTGAATCATTACAGGAGCGAGTCGAGGGATTTCGGTTCGCGATGGCCAAGCGAAGC  
ATACGCCGTCCTGACCGCACGAGGCTGCGCCACCGCCGCCCCTGGACACGCGAGAAA  
AACGAGAGGACTACCGGGATTTCATTCGGGATTCCTCGTTGAGGGAATTGAAGGAGAT  
GCGCGAGAGCAGGGAGAGCAGGGACAGGGAGCGGGACAGAGAAGGGCGGGAAAGG  
GAAAGAGACAGAGAAAGGGAGTTTAGCGCGAAAGAGAAGAGGAACAGTAAACCGGA  
CGTACCTGTCGTACCTATGGTGGACCATAGGCCCGGTGAAGACAAGCAGAGGCCAAGG  
AGCTCGCAGGAACCTGAAGCATTCTCGAAGCGCGGCCCTTTCCGGTGTGTTTTACCTC  
TCCTGTCCGAGCTTCAAAGGAAACATCAATATTCGGCAAGAGACAATAATGGTGAAGG  
CGGAAGCGGCATTGGCAAGAACGGAGGCGCGATAGAGGAACCTGCGCAGCGCGTTCTGA  
AACAGCGGAACGCACCTCGCCGGGAATGACCGAGGCCCTTATCAGGGAACTCCTCAA  
GTCTTTACTTCCTGCCAATCATTCGGAGGGTTGCCTGTTTCATGCTGATGGAAAAAGTTA  
TCCTGAG

>novel\_circ\_001743

GGAACGAAACTATGGATTATTATGGAGTACTTGGGTGGCGGCTCGGCCCTGGACTTGAT  
GAAGGCCGGTAACTTCGAGGAAATGCATATCGCGGTGATATTGCGCGAGGTGCTCAA  
GGGTTGGATTATCTTCACAGCGAACGGAAGCTCCATCGCGATATTAAAGCGGCGAACG  
TTTTGCTGAGCGAGATGGGCGACGTCAAGTTGGCCGATTTTGGCGTTGCCGGACAGTT  
GACCAACACGACCAGCAAACGGAACACTTTCGTCGGGACGCCGTTCTGGATGGCACC  
GGAAGTCATCAAGCAAGCTTCCTACGATTCCAAG



>novel\_circ\_001744

TATTGCAGGACTAGGTTGCTTGCAGTACTGAATCAAAATGGAATCAATGGATGCGCGCC  
TTGTGGCGCAAGCATTGAACTACCATGGTCAACAGTTGCAGAAAGTGTGGGAAGGAG  
AACGCAACGAGAATGAGCTGGCCATGCTCAATCTCAAGGAACCAAATTTTGAGATCTA  
TCAACAACGTCAAAAGACTTTGAGTTTTGGTGATAGAGGAAAAAGGCTAAAGCTACA  
GCAGTTCTTAGCAAAGAAAGCAGATGCCCTTTATGATAAATCAAATTTGGAGAAAACA  
GTTGAACCTATTAAGCAAGAATTAGGAGATGAAGAATTTTATGCAACAATGCCAGGCCT  
TGATACTTTTGTCAACCATGGAAAAATCTCAACGTATTCGTAATTTTTTGGAGAGTTTGGT  
CATTGGAGATGTTATTTACGCGCAAGTGATGGGTAAAAGTGCTGCTGGACTTCTTCTGA  
AGGTGCTTTGCAACTGCAGCGATTGCCCCAGAGTTGTTACTGATTTAGGAGTTAAGGCT  
CTAATATTGAACACGGCCACAGTGCCGGCAGTGGACAAGAAAGGTGTAACAAGAGGC  
TACATGGCAAATGATCTCATCTGCGTCGTAGTCAGTGAAGTTAACGTTGAAGCCGAGC  
GAGTTGTTGCAGTTATGAACGTACCTGCCCCGTGAAGGGCAAGCACCACACCCACCTAT  
GGGACTTATCCATTCTGATGATCTTCCAGAAGCTTATAA

>novel\_circ\_001746

GATTGTGCACAATTTATCCTCGACTTCTTAATCCTACTATTAACGATGCCATCACTATTAA  
TTGGAATGGTGTCAATTATCAGATCAGACGAATGGATCTTGATGTCTGGTGATCA  
CATACATCATACGTATAGCATCTTTGTGAAATTAGTACAAAATAAGAAATTGGCTTTAAG  
AGTTTATATCGGTGAACATGAAATGGAAATTATGCCTCTTGAGGCAAAAGTATCTGTGA  
AAATAGATAATAAAATTATTGATGATTATCAAAAAGGTATTACAGTATCCGAGAACGAGT  
CACATTCTTATCCTATGAGATTAACCACTGCCTATAACTATGTAGTAATTGATTCACAAAC  
GATACCAGTTCATATTTTCTATAAAGTAGACAGTGTGACTGTTTCTCTGCATACTGATCT  
TCAGAGTCGAGTAACTGGAATCTGTGGTAACATGGATGTTATGCATAAAGATGAAGTTC  
CAGACGTACATAGTGTTTCATATCTCTAATAAAAATAAAATGAAATCATCTAATCATATTTT  
CCATCTTATGAAATATGTTTAGTGTCATTATTTAGCAGCAGTTATTGATTTTAATATTATAA  
TTATATTAACAATCAATAATTTCTTTTTTAGGATAATATGGAATGATGATGTA

>novel\_circ\_001747

ATTCATTAGTGGAAGCTGCTTTAGCATTTAAATTTCCACGAATATCGATTCTCTTACTGC  
GTAAAAGATCCATTTTTTGTGTCTCGTGAAAATCTTGAATGCTAACTTTTCCAATTAAGT  
CGATCTAATGAAAAAAAAAAAAAAAAATTTAAAAGAAAAATACATGCGTATTCTGATCG  
GTTATTATAAACGTGAAAGAATTTTTTCAATTTACCACCGAAGTAGGATAAATGATACT  
TGGTTCGACTTTATAAACGAGAGACAACCTTTTTCTTGTCCCAAATTATATC

>novel\_circ\_001749

GAGGAGCAGGTGACAGCAATCGCGCTGGAGCTTTAAGAACCAAGGGGTGGAGAAGG  
CTGGAGAACGCATTTCCCGTCGGATACTTGGATCAGCCGAGGAAGGAGGATCGTTTTTC  
AAGGAAGCTCTCGTGCAACCTGTGCACGTTCTCCTCCTTCTTCGTCGTCGTCTGTGGTA  
ACGAGCAAGAAAGACTTAAAAGAGAGAGAGGGTGAGGGCGAGGATGAGGCAAGTTG  
TCGTGTTGGAGCCGGCTGGCAGCGTTCTGGTGATCAGGCAGACTTCCCTCGGTAGTAA  
CGTCACTACCGGTAACACCAATTCCAATGCTGGATCCAACAACGCTCACGAGACCCAT  
GGGCTGGCCAATCACGCCGCCGTGTCCACCATTGCCTCCAACGATCACAATCAGAATC

GTATCGTGGTCGTACGCTCGTCCTCCTCGACCTGCATGACTACCACG

>novel\_circ\_001750

GAGGAGCAGGTGACAGCAATCGCGCTGGAGCTTTAAGAACCAAGGGGTGGAGAAGG  
CTGGAGAACGCATTTCCCGTCGGATACTTGGATCAGCCGAGGAAGGAGGATCGTTTTC  
AAGGAAGCTCTCGTGCAACCTGTGCACGTTCTCCTCCTTCTTCGTCGTCGTCTGTGGTA  
ACGAGCAAGAAAGACTTAAAAGAGAGAGAGGGGTGAGGGCGAGGATGAGGCAAGTTG  
TCGTGTTGGAGCCGGCTGGCAGCGTTCTGGTGATCAGGCAGACTTCCCTCGGTAGTAA  
CGTCACTACCGGTAACACCAATTCCAATGCTGGATCCAACAACGCTCACGAGACCCAT  
GGGCTGGCCAATCACGCCGCCGTGTCCACCATTGCCTCCAACGATCACAATCAGAATC  
GTATCGTGGTCGTACGCTCGTCCTCCTCGACCTGCATGACTACCACGAAAAGTTCTCGC  
GATGTAACGACAAGGTTCCATAGAAGACATCCAACATTTTTTACCAGGCTGACAATCAT  
TCATCCGCGAACGGTAACAACATCAATATTAACGGCAACCTGAAGGGGAACCCGGGGG  
CAATCGGTAGCAAAAACGTCGACGAAGGTTGTGGTTGGTGGCGGAGTCTCCAAGTCGA  
ACGAGAGAAACGATCATCTTAGAAACGATCACAAGAGCCAAGATGGGATCGGTGAATC  
GAATCCTGGATGTCGTCCAAGGACGAGCAAGGAAGCCGCACACGAGAACGTTCCCTT  
AGACAGGAAGCTCGATGGCGCGGATCCCATCTCCG

>novel\_circ\_001751

GCTGACAATCATTCATCCGCGAACGGTAACAACATCAATATTAACGGCAACCTGAAGG  
GGAACCCGGGGGCAATCGGTAGCAAAAACGTCGACGAAGGTTGTGGTTGGTGGCGGAG  
TCTCCAAGTCGAACGAGAGAAACGATCATCTTAGAAACGATCACAAGAGCCAAGATG  
GGATCGGTGAATCGAATCCTGGATGTCGTCCAAGGACGAGCAAGGAAGCCGCACACG  
AGAACGTTCCCTTAGACAGGAAGCTCGATGGCGCGGATCCCATCTCCGGGACGGAGGT  
CGAGAGTCGCGGGTTGGCTCACTCTGCGGGTCCCGCCGCTCGGGAGCAGACACGCGG  
GGCCAAAGACTAATTTGAACCTATTTTATTAACAAAACAAAAACATACATATTTGTAAAT  
AACACTAAATAACACGAAGTAATACACACGTCTCCTAAAGTCTCTTTATCTACTCTAAAT  
AAAAAAAAAAAAAGAATAAAGGAACTCTTAGACCTCTGTAAAAAAAAGAAAAAGCG  
AACAAACAAAAAAGAACAAAAGGAACGCAAGCGACAAAGTTAATACTATTTCCAGTC  
CCTAAGCGAATCGTTACGAAGCCTATAACGCGACGGAAACGAGGATACGTGTGAGGAT  
AAAGCGAGGGAAAGAGAGTGGCCTAGAGAGAAAGAGAGAGAGAGAGAGAGAAAGG  
GGGAGGCTATCGGTGGTGTCGGCAAGAGAAAGGCGCGCGTGCGAGAAAGAGAGAAA  
GATAGAGAAGAAAGGAAGGAAGGAAGGAAGGAAGGAAGGAAGGAAGGAAGAGCGG  
AAGAAGAGAGACGAACGAGAAGGCAAAGGATCGAACGTGGTTAAAGGCGATCGTAA  
AACGCGTCAGCTGTGGGCGAATCTCTTTTAAAGTTCTCTCTGTACTGTGTGACCCTTAC  
ATTATTTTGTCCCTCCAGGGACAGGTTCAGTGTTGTAACCTTAGGATATAAGAAGATAA  
GAGCTCCTGGAACGCACAACAAGAAAGAAAATTAATAAAAGGGAAGAGTTGAAGAA  
AGAACGAGAGAAAGAGAGTGTGTGCTTGTGAGAGAGAGCGAGAGAGAGAGAGAGA  
GAGAGAGAGAGCGCTTGCGTGCGTGCGTGTGTGTGTGTGTGTGTCAGGAAGAGAAAG  
AGAGAGAGAGAGAGAAAGAGAGATTCGAGAAAGGACTGAGACTGAGAAAGAAAGA  
GAACCAAGGTCTGAAGAGGTACAGAGAACACTAAGAGATAGAGGTAGACGAAGACGG  
GAGAAGAGAAGAAAACGAAGAGAAGATTGTCGTCGAGAAAATTGTTTCGTTGAATTAA  
TCTACGAGAATAAAATGGGGCTCCAGTTTTTTTGTACTAACGCGAACAAAGTATTTGAAAA  
ACGAAGAAGAGGAAGAGTACGGAAGAGAGAGTATATAATATTATATAGATCGAGAAGA

AGAAGAAGAAGAAGAAGAAGAAGAGGTTTCGATCTTTATCACGGTGTCTGGGACAGTTT  
CTATCTCCACGTGTGTTGTCCATTACACGACGTCGCATCGAGAGAGGGAGGGTCGTCTT  
CAACGTTTGTATCGTGAATCGTTTATCTGTCTGCTGTGACTCTTGATTCCTTTAGGGGAG  
AAGCGGGCGCGGAAATAAATTCGATTGACTTTTGAAACGAGGGTAGAATAATTCGAAC  
GAACAACCTGGCTCGCGTACACGATTCTTTGGGGGATATGTCCTGCCGTTCTAAGGGG  
AATCACCACCCACGTGCACGAGCCTCACGCAGAGGGCAACGTCAAGCGAGTCGTGTT  
TCCATCCTAGAACCCGGCAGCAAGCTCTCCTGACAAAAAGAGTGCCGTCGTAGCTTGT  
CACGGTCTAGAATCACCGCGAGCACCGACCATTGTGCGAGTCGCCATATCAGCCGCACA  
CTCGTCCAAATTCACGAGGAGCCTGGGGATGTCTGCGAGGGCACAGAAACGGTCGCG  
CTACGCGTACGTTACGGGACGATGACGATCGGCCACGATCGGTAAGATCCAAGAAGCG  
GTCGCTCTGACGAGCGCCACGGAAATGGCGGGCTACAATCATTGAATCCACAGCGTG  
TCGTCTATCATGCGACCTACCCGACGCCACTCGCACCAAATGGAGATCCGATAAACTT  
CCGAGAAATTTGGAGACCTTGCCACGAGCTGAACATTTTCCAACCTCAGAGGCACCGAT  
GGAACACCAACGAG

>novel\_circ\_001752

CTGTCAAAGCGCCGGATATTGGTGAACGAACGAGTGGGTACCGCTTGGGGCCCCCATA  
GAGAGGGCCCCCAACCGGAACAGGCCGCCGAAAGGCGGTCCATCTATCATCAGACGG  
TTCCGAGGGAATAGCGGCGAGTGTTTCATGAATGGATCGATGGGAGCGTAGAGTGTGTC  
GCGTGTGAATACAGCATTTTGTGCACGTTTTTTTTTAATAAAGTTTCTTCGTTTCGAGGAG  
AGGGGAAAAACTTTTCGGCCAAAGTTTCTTCTTCGGCAAACAAGGCGACGCGGAGTTT  
TCGTGATAATAGGGACTTTTGTTCCTTTCTTTCTTTCTTTCTTGTCTTCTTTTTCTTTTTCT  
TCATTTATTCCTCCTCCCTGTGCTCCGTTTTTATCGTTCGACGAGGAGAGAGAGAGA  
GAGAGAGAGTACTCGGATTTATTTTATGCCGGCGCTTTGAACTTGGTTTCAAGGAAG  
AAGGAGAGAGTTTACCGTATAATTCTCTGGGCATGGAGCAGTTCGAACAACCTGCTAAC  
GTGCGCGATATGCCTGGACCGGTACAGGAACCCCAAGTTATTGCCATGTCAGCACAGC  
TTCTGCATGGAACCGTGTATGGACGGCCTCGTCGACTACGTGCGTCGACAGGTGAAAT  
GCCCCGAATGCCGTGCGGAGCATCGTATACCCTACCAGGGTGTCCAAGCGTTCCCGAC  
CAACGTTACCCTGCAACGATTCTTGAGCTGCACATCGAGATCACGGGAGAGCTGCCG  
GACCCGACCAGCGGCCAAACCATGGAACGTTGCGGCGTTTGCTCCGAGAAAAGCTAC  
TGCAGCCTCTGCGTCCACTGCGAGAAAAAATGTTGCCCCGAGTGCAAGGACGCTCAC  
ATGGACATCCTGAGGCGCGAAATAACGCGCATCAATTCCCAGATTTCGACGGGGGCTGC  
ACAGGTTGCAAGACGCGCTCACCTGGTGGAGAAAAACACATTGGGTCTGCAAAACA  
ACTGCGCCTCGGTACGGAAGAGGTGGACGAGATTATCGGAGGCTGAGCAAGGCTT  
TGAAAGACCGTACGGAACATCTGCGTAACGAGGTCGATCGATACCTGAGCACCGAGCT  
CAGAGGCTTGATTCAACTCAAAGAGAATCTCGAATTGGAGATCGCGAATATTCAGAGC  
AACTGCGATCTGGCGGAGGCTCACATCAACGAGAACGTGCCCTGGGACGACTCGGAA  
CTCCTCGATACAAAAGAACTCTTCTGCGTACGGTGGAAATTCATCAGGAACTTCGAGTA  
CGAGGCAGGGGATTACAGTCGGCGGGTGCGTTTCGTGATGGCGCACGATCCGAATCAG  
CTGGTCCTACACGTAGCCGGTTACGGCGAATTGAATATCAAGCCGGAGACCGGAAGTG  
GAGGATTGCTGGGCAGCTCGAGCAGTCTGGCACCACCGGGGGGATCACCGGGCCTGA  
TGAGAAGCAAAAGCGACCACCGCTTGGCCTCCAGTACAGGCAGCAAGAGGAGGAG  
CGGCTGGCGAGAAATCGATACGTCCCCGAATACGAGTACGACGCGCCGGAATACGAGG  
TGCCGAGGAACAAGTCGAGGTACAGAAGTCGATTTCATGCGGCATCGGGACGGCGACG

ACTCCGACGGCGATTTCGAGATCCACCGTGCGATTACATCCACCCCCCAGGAGTCGTC  
GGGGCTCCGCGAGCGTGTCTCGACACGGAGGACGCGGCGCGCGGCCCGCTTTCCGG  
CATTTTTTCGGCTCACCGACTCGCCACGCGTGATGAGAAAGCTTCAGGAGTACGAGAGG  
GCCGGGAAAAGGAAGAAGGAGGAACCGCCGCCCATCCTGTTCAACAACCTCAACCG  
CCCAAGCCTCAG

>novel\_circ\_001753

GCATGGAGCAGTTCGAACAACCTGCTAACGTGCGCGATATGCCTGGACCGGTACAGGAA  
CCCCAAGTTATTGCCATGTCAGCACAGCTTCTGCATGGAACCGTGTATGGACGGCCTCG  
TCGACTACGTGCGTCGACAGGTGAAATGCCCGGAATGCCGTGCGGAGCATCGTATACC  
CTACCAGGGTGTCCAAGCGTTCCCGACCAACGTTACCCTGCAACGATTCTTGGAGCTG  
CACATCGAGATCACGGGAGAGCTGCCGGACCCGACCAGCGGCCAAACCATGGAACGT  
TGCGGCGTTTGCTCCGAGAAAAGCTACTGCAGCCTCTGCGTCCACTGCGAGAAAAAAT  
GTTGCCCCGAGTGCAAGGACGCTCACATGGACATCCTGAGGCGCGAAATAACGCGCAT  
CAATTCCCAGATTTCGACGGGGGCTGCACAGGTTGCAAGACGCGCTCACCTGGTGA  
GAAAAACACATTGGGTCTGCAAACAACTGCGCCTCGGTACGGAAGAGGTGGACGA  
GATTTATCGGAGGCTGAGCAAGGCTTTGAAAGACCGTACGGAACATCTGCGTAACGAG  
GTCGATCGATACCTGAGCACCGAGCTCAGAGGCTTGATTCAACTCAAAGAGAATCTCG  
AATTGGAGATCGCGAATATTCAGAGCAACTGCGATCTGGCGGAGGCTCACATCAACGA  
GAACGTGCCCTGGGACGACTCGGAACCTCTCGATACAAAAGAACTCTTCCTGCGTACG  
GTGGAATTCATCAG

>novel\_circ\_001755

GCATGGAGCAGTTCGAACAACCTGCTAACGTGCGCGATATGCCTGGACCGGTACAGGAA  
CCCCAAGTTATTGCCATGTCAGCACAGCTTCTGCATGGAACCGTGTATGGACGGCCTCG  
TCGACTACGTGCGTCGACAGGTGAAATGCCCGGAATGCCGTGCGGAGCATCGTATACC  
CTACCAGGGTGTCCAAGCGTTCCCGACCAACGTTACCCTGCAACGATTCTTGGAGCTG  
CACATCGAGATCACGGGAGAGCTGCCGGACCCGACCAGCGGCCAAACCATGGAACGT  
TGCGGCGTTTGCTCCGAGAAAAGCTACTGCAGCCTCTGCGTCCACTGCGAGAAAAAAT  
GTTGCCCCGAGTGCAAGGACGCTCACATGGACATCCTGAGGCGCGAAATAACGCGCAT  
CAATTCCCAG

>novel\_circ\_001757

ATGCAGTCTATCCTGTATCACAAACAGTTCCGGGGCGCAAGCGTTCACCGGAAACTTGA  
AGAAAAAAGAAGTTCACCGTGCTATTACGTTGCATCCTGTAAAAATCCGCCGCACAT  
GTACAGATTGCACAATTACATGAGGGGACTTAAGATTCAAGATCTGCAACAAGAGAGA  
CTCAATCTTCACAGGGATATTTACACTATGGCGAAGCAATTGGGGATCAGAGTGGAGAA  
TCTGAAGAATTACGAGATAGCCGATCGTGTCCCACTGTTTCCAGTCAAGCCTTATTCGA  
AACTGTATCCCGGTGACACCGAAATATTGG

>novel\_circ\_001758

GTTTGAGCGACCGGTGCTCGGTATCGAGAAGGAGGAGCGATGGGATCGTACGAAGAA  
TTTCCAGCACTCGCGCTAATCAACACATTGGAATCATTAAGAAGGGGATCACGGGCG  
CTAGAAAGATGAACCCAGCCGGAGATCCACAGACCCACGAGATCAATGGATGAGGT

GACGTTTCACCCAGTGATGCGTAAACGACGTGGACTGGCCAGCGCCATTCTGGGCCTG  
ATAGTGGGCCTTCTCCTAGGTTTCCTCATCCAAAGCTACAAGATACTCTCCTCGAGCAG  
CCAACATCAACGGTTAAACGTTTACGCGTCCTCGATGCCTGGCTCGCGGCTGTTAATCA  
AACCATCGGCGAGAAACGTTCCGAAATTGGAAGACGACGAGCGGATAAACAGTTCCT  
CGACCAGTTTGGTGTTCGTGGGCGTGATGACGGCGAGCAAGTATCTGGATTCGCGAGC  
CAAGGCCGTCTACGAGACTTGGGGCAAGGAGCTGCCGGGAAAAATTGCCTTCTTCTCG  
TCCGAAAACTCGGTAGTCCCGAACAATTGCCCCGATCTACCGTTGGTGGCGTTGCCCC  
GTGTCGACGACACGTATCCACCTCAGAAGAAATCGTTCATGATGCTTCAGTACATGTGG  
AACAACTACGGGGACCGTTTCGAGTGGTTTCTCAGGGCGGACGATGACGTTTACGTGA  
GGACCGATCGTCTGGAGCAACTGCTACGATCCGTCAATTCCAACAGGGCGATGTACAT  
CGGCCAGGCGGGAAGAGGAACTCGGAGGAGTTCGGCCTCCTCTCGTTGGAGTACGA  
CGAGAACTTTTGCATGGGCGGGCCAGGCGTTATTCTGTCCAGGGAGACGTTGAGAAGA  
ATCGTGCCCCACATCAAGTATTGCCTCAGACATTTGTACACCACTCACGAGGACGTTGA  
ATTGGGAAGATGCGTGCAAAAGTACGCCGGTATACCTTGACCTGGAGCTACGAGATG  
CAGTCTATCCTGTATCACAACAGTTCGCGGGCGCAAGCGTTCACCGGAACTTGAAGA  
AAAAAGAAGTTCACCGTGCTATTACGTTGCATCCTGTAAAAATCCGCCGCACATGTAC  
AGATTGCACAATTACATGAGGGGACTTAAGATTCAAGATCTGCAACAAGAGAGACTCA  
ATCTTCACAGGGATATTACACTATGGCGAAGCAATTGGGGATCAGAGTGGAGAATCTG  
AAGAATTACGAGATAGCCGATCGTGTCCCACTGTTTCCAGTCAAGCCTTATTCGAAACT  
GTATCCCGGTGACACCGAAATATTGG

>novel\_circ\_001759

AAAGTTGTTTGTGTTGGTGGTTTGTCTGGGAGACAACACAAGAAAATCTTCAACGTTAC  
TTCGGCCGTTATGGCGAAGTAATTGACTGCGTTGTTATGAAAAACAGTGAATCTGGTCG  
CAGTCGTGGTTTTTGGATTTGTAACATTTAGTGATCCAGCTAATGTTCCATTAGTTCTTCA  
GAATGGACCACATCAACTTGATGGGCGCACAATTGACCCGAAACCATGTAATCCACGC  
ACTCAACAAAAACCAAAACGCAGTGGAGGCTTTCCGAAAGTTTTTCTTGGTGGCTTAC  
CAAGTAATGTGACAGAGACCGATTTGAGGTCTTTCTTTACCCGTTTTTGGTAAAGTTATG  
GAGGTTGTCATAATGTATGACCAAGAGAAGAAGAAATCAAGGGGATTTGGCTTTCTCA  
GTTTCGAGGATGAAGATGCAGTGGACCGATGCGTAGCGGAGCATTTCGTCAACTTGAA  
TGGAACACAGGTTGAAATTAAACGCGCAGAACCAAGAGATTCTTCTAGCAAAATGAAT  
GATAGTCATCAAGGTCAGTGGGGACCACCTCAACAAGGTGGACCTCCAATGGGAATGG  
CTGGGAATATGGGACCTATGGGTGGTCCAAATGGACAGATGAGTGGACCTATGATGGG  
AGGTCCAATGGGTCCACCAGGAAATATGATGCAGCAATATCAAGGTTGGGGTACCAGT  
CCTCAAACCTGGAGGATATGCTGCTGGATATACTCAGTATAATTCTCAGGGCTGGGGTGC  
ACCACCTGGCCCTCCTCAGCAACAACAAATTCCACCACCACCACATCATCAATGGGGT  
AGTAGTTATAATGTTCAACCTGCAGCAGCTACTCAAGGTTATGGAAGTTATGGTGGGCC  
GGCAGCGGCCGCTTCAGGGGGCTATGGGCCCACAGCGGGTACTGGCGGGGCTGCGGG  
GGGCGGGCCCGGGGGTTCTTGGAACCTCCTGGAATATGCCACAAAATGGGCCCCCTCCT  
GGGACTCAGCCACCACCTCAGCCCCCTCAGCCTAATTCTCGCAGCCCAACTCCAAC  
CGAACCCTCTGGCCCGCAGG

>novel\_circ\_001760

AAAGTTGTTTGTGTTGGTGGTTTGTCTGGGAGACAACACAAGAAAATCTTCAACGTTAC

TTCGGCCGTTATGGCGAAGTAATTGACTGCGTTGTTATGAAAAACAGTGAATCTGGTTCG  
CAGTCGTGGTTTTTGGATTTGTAACATTTAGTGATCCAGCTAATGTTCCATTAGTTCTTCA  
GAATGGACCACATCAACTTGATGGGCGCACAATTGACCCGAAACCATGTAATCCACGC  
ACTCAACAAAAACCAAAACGCAGTGGAGGCTTTCCGAAAGTTTTTCTTGGTGGCTTAC  
CAAGTAATGTGACAGAGACCGATTTGAGGTCTTTCTTTACCCGTTTTTGGTAAAGTTATG  
GAGGTTGTCATAATGTATGACCAAGAGAAGAAGAAATCAAGGGGATTTGGCTTTCTCA  
GTTTCGAGGATGAAGATGCAGTGGACCGATGCGTAGCGGAGCATTTTCGTCAACTTGAA  
TGAAAAACAGGTTGAAATTAACGCGCAGAACCAAGAGATTCTTCTAGCAAAAATGAAT  
GATAGTCATCAAGGTCAGTGGGGACCACCTCAACAAGGTGGACCTCCAATGGGAATGG  
CTGGGAATATGGGACCTATGGGTGGTCCAAATGGACAGATGAGTGGACCTATGATGGG  
AGGTCCAATGGGTCCACCAGGAAATATGATGCAGCAATATCAAGGTTGGGGTACCAGT  
CCTCAAACCTGGAGGATATGCTGCTGGATATACTCAGTATAATTCTCAGGGCTGGGGTGC  
ACCACCTGGCCCTCCTCAGCAACAACAAATTCCACCACCACCACATCATCAATGGGGT  
AGTAGTTATAATGTTCAACCTGCAGCAGCTACTCAAGGTTATGGAAGTTATGGTGGGCC  
GGCAGCGGCCGCTTCAGGGGGCTATGGGCCCACAGCGGGTACTGGCGGGGCTGCGGG  
GGGCGGGCCCCGGGGTTCTTGGAATCCTGGAATATGCCACAAAATGGGCCCCCTCCT  
GGGACTCAGCCACCACCTCAGCCCCCTCAGCCTAATTCCTCGCAGCCCAACTCCAAC  
CGAACCCCTCTGGCCCCGAGGGTGACATGTATTCACGACAGACCACCGGCTCAGGTGC  
ACCTGGGTCCAGTAGCAGTTCAGCTAAAACCTCCGGATTATACTGGGTACTCTGCATATG  
GTAATTACGCTGACACCAGTTATCCTCAGCGTTCGTATCAAGGAGGAGAAAGCAACCA  
AG

>novel\_circ\_001761

GTGGGCCGGCAGCGGCCGCTTCAGGGGGCTATGGGCCCACAGCGGGTACTGGCGGGG  
CTGCGGGGGGCGGGCCCCGGGGTTCTTGGAATCCTGGAATATGCCACAAAATGGGCC  
CCCTCCTGGGACTCAGCCACCACCTCAGCCCCCTCAGCCTAATTCCTCGCAGCCCAAC  
TCCAACCTCGAACCCCTCTGGCCCCGAGGGTGACATGTATTCACGACAGACCACCGGCT  
CAGGTGCACCTGGGTCCAGTAGCAGTTCAGCTAAAACCTCCGGATTATACTGGGTACTCT  
GCATATGGTAATTACGCTGACACCAGTTATCCTCAGCGTTCGTATCAAGGAGGAGAAAG  
CAACCAAG

>novel\_circ\_001762

GGCAGGGATGGCAAGGGAAGTATCTACGTGTGGGCTTCTGGTAATGGAGGTTTCGAAAT  
CGGACGACTGCGGATGCGACGGATACGTAGGAAGCATTTACACGATCGCAGTTGGCTC  
TGCCAGTCAGACCGGAAGATTTCCATGGTACGGTGAAAGCTGTCCCGCGACAATGGCC  
ACCACGTACAGCAGCGGAGCTTACTACGATCAAATGATAGTGACGACAGACTTGAAAA  
ACACGTGCACCGTTGGACACACTGGTACTTCCGCATCCGCTCCACTAGCTGCCGGTATC  
CTGGCCTTAGCTTTGCAAGTAAACAAAAATTTAACCTGGAGAGACGTGCAACATCTCA  
TCGTTTGGAGCTCGGAATACAGTCCACTCAGGGAGAATCCTGGCTGGTTCAGAACTC  
GGCTGGATTTTGGTTCAACTCACGTTTCGGCTTCGGACTTATGAACGCGTACTCGTTGG  
TCTCGGCAAGTTACAATTGGACCACCGTCCCCGCCAAGGCCATCTGCAAAGTGAACGT  
TGCTAAAGGAATCGAGAAGAAGTTGGCTTATGGAAATACGAGGAGGATACGATTCGAG  
GCGGAAGATGAGTGTGTCGTGCGGCGGAGAACGAGATTACGTTTTTGGAACACGTGGAA  
ATCGAGGTTAGCCTCGAGTACAGCGTTTCGCGGTTCTATTTCAGATACACCTAACTGCGCC

ATCAG

>novel\_circ\_001763

GGAAAAAATGGTGGATAAATTGGAATGGTTAAATAACGAATTCGTGCAAAGGGTCCT  
CCAGTACAATGAGTACGACACCAGCATCAATGTAACGAATATATCCGCGAAACCGGCG  
ACCAGCAAAGGTGACAATTATGCCAGCGACATGTACAGGGTGACCGTGAAATACACGC  
AGAAGGAGGGCAAGACCAGGGTCAATAAGGAGACGTCGATTGTGTGCAAGTTCGAGC  
CGTTGGAGGAGGACGCTCGAAGGGAAGCGATCATGTCAATGGGTATCTTCGAGAACG  
AAATCTTCATGATGTCGAATTCGCTACGAAAGATGCAACAAATGTTGGGCACTCGGCTG  
GGAGCAAATGTACTTTACTTTAGAAATGGAACGGCCGTTTGTGTTGATATTGGAAGACCT  
TGCTCGTCTAGGATTTTCGTATGGCCGATCGTTTCCGTGGTTTAGATTTTCGATCATTCCAA  
GCTAACTCTTCAAAGCTTAGGCAAATTTACGCGGCGTCGGTTCGCACTGTGCGAGAAG  
GAACCCAAATTAAAGACTGTATATCAGAAAGGGATACTGTACGAAGGAATGCCGACCG  
AATTCAAATTCTTCTTCATCTCCGCAATTAAAGCTCTTGAGACGATTTGGCAAATTGG  
CCGCAAGACGTGAAAAG

>novel\_circ\_001764

CCGCTCAGGCGAAAATCGTGGGTCCGGAAGACGTGTACGTGAAGAAGGGTAGCACGA  
TAAGCCTCACGTGCATCGTTAATGTGCAAAGTACACCGCCCAGCAGCGTTTCGTGGCAT  
CACGGAGGAGATGTGATGGATTTTCGACAGTCCCAGCGTTCACCGTAGGGGGCGGGGTTT  
CCTTGGACACGGAGAAGACGGAAAGCGGAACGACGAGCAGACTTCTGGTGACACAA  
GCCAGATTGACCGACAGCGGAAATTACACCTGCATTCCCAGCAACGCGAATCCAGCCA  
CGTAATGGTCCACGTGCTGAATG

>novel\_circ\_001765

GGGAACATCCAGCGGCCATGCAACACGGCGGAAGTTGCGGCGTCGCGCCCACCATTTT  
ATCGGCGACCCTTACTCTGGTGATCTCGAATCTGCTAAGGTGAGCGGTGTCTGCTTGT  
GAATCGTGCGACTTGGAAGCCATCACACGGGCTGTGGTTCGAGCTCGTTTCGTGAACCG  
GTGAGACGGTACCCCCGAAGGAAGGAGGAGGGATTGGTGGTTCTTGTTCAAAGGTAA  
AAAAGCGCGAACGAAGGAGAAGGCCGCGCGTCCCTCTGCTTTGAGAGAGGAAAGCAT  
ACGGCGGAAATCACGTTGCGAGAATAGAAACGTGACTTAGCGGTGCTGCCAACGGTG  
CTGCGAAATCATCGGGGTGGTTTTTAAATGGGGGGTGGAACGGCAGGGGGACAGGGA  
GAGGAAGGGATTTAGGGGTTGGAACAAAGTGACGTGGATCTGGACGGCAGTGGTGGT  
GAATGACGCAGTGACACGGAAAGTGAGCTCGACTTTGCACAC

>novel\_circ\_001766

AAATTCAACGAAATAGGGAATTTTACAAGAACGCCGACGTCAGACCGCCGTTTACATA  
TGCATCATTAATTAGACAGTCGATCATCGAGTCGCCGGATAAACAGTTGACCTTGAACG  
AGATCTACAACCTGGTTCCAGAACACATTCTGCTACTTCCGGCGCAACGCAGCAACGTG  
GAAGAACGCAGTGCGACACAACCTGTCTCTCCACAAATGTTTCATGCGAGTCGAAAA  
CGTGAAAGGCGCCGTATGGACGGTGGACGAAGTGGAGTTTACAAGAGACGTCTCTCA  
ACGCGCTTGCAGCACGACCGG

>novel\_circ\_001767

ACACTTGAACACGGAGCACACGCTGGACGACAGATCGACGGCGCAGGCTAGGGTCCA  
GATGCAAGTGGTCTCGCAACTGGAGATCCAGTTGCAGAAGGAACGGGACCGGTAAAC  
CGCTATGATGCATCACCTGCACGTGGCGAAACAAATGGCTTCCCCCGAACCGCCAAAG  
TCGTCCGAGTCATCGACGGGCTCGAGTATACCAAAGTTAAATCTCTCCACCGCTCTGAT  
GAGCCAGCCACCACCGAATTTCCGGTGTCTCTCAAGTGTCTCCCGTCTCGATGTCCGCTT  
TGGTGTACGCGGTACGGTCACCAGCAGGTGGACAATTGCCACCTTCGGCCGGAGCAC  
CTATGCCACCCATTCTAACATGTCCAACATGTCAGGGATGCCTCCGTTGCCGAATATGC  
CTGGTAGCATGCCACCATGCCTACCATGCCAGCATGGCGGGGGCCCATCAGACGACG  
TATCAGTGATAAATCCGCGCTTTCCTTGGCAGGAG

>novel\_circ\_001769

GCTACTTCGCTGTTTGCAGCCCTGAAGCAGCAACAACAGCAACAGCAACCGCGCGAC  
ACTGTCCCCTCGTCGAGGGAGCGCGTCGAGAATCGAGATCGAGATCGATTGTCCGTCC  
GTAACCGTGAGAACAAACCGGAACGAGATAGGTGGTGGCGTGACGGAGCAATCGCAGC  
CAGCGCAGCAACAACAACAGCAGCAGCAGCAGCAACAGGAGCTCACGATCGAG  
TATCAGAGCAATGGAAAGCTCAGTCCCGCTGGGCACGCAGTGACAGCAGCACCCATG  
ACCCAGCAAAAGCAGCCTATCATCACGCAGCAATCGCAACAGCCGAGCTCGGGGGCG  
CCTGGTCCCCAACCGAGTCCTCATCAGAGTCCGCAGGCCCTCAGAGGGGTTTCGCCGC  
CAAATCCTTCGCAGGGTCCCCCGCCGGGAGGGCCGCCAGGGGCACCACCTTCGCAAA  
ATCCCTCGCAGATGATGATCAGCCCGGCTAGCGGCATCCACCAGATGCAACAACCTGCT  
GCAACAACACATACTCAGCCCCACCCAACTGCAATCCTTCATGCAGCAACACTCGCTC  
TATTTACAACAGCAACAACAGCAACATCATCAGGATTCCTCGTCGGAGCATGCGTCCAA  
TCAGGAACGATTTCGGCTACTTTTCGTCCCTTAAAGACCATCAACACCAGTTTCGCCGAG  
CTGGGCAGGAAGAAGCTGGAGCAGGCGATACAGCAACTGCAGGAACAGTTGCAGTTG  
AACGTGATCCAGCAGACGCATCTGTTGCAAACGGCGGACAAGAAGAAGGCGTCCGCC  
CCGCTTCAACAATTGGCGCTTCAACAGCAACGTCTGATACAGCAACTGCAGATCACGC  
AGAGCCAATATCTTCTTCAACAGGGTCTGGGTCTTCAGGGTCACAATCCTTCTTCGGGT  
CTCCAACCTGGCGAAGGACTACCAATGTGGAAATCGGACACGTTCGGATGGTCCGGAAT  
CGCATCAGAACTCGAACGTTCCAAAATCCGTGGCTGGACTCAATGGACTTCTCAATTC  
GACAGTGTTCGAGTCGGCGGTCGGATATGAACGGAACCACTCCATTGGACGAGAAACC  
GCTGGACGTTTCTTCCAACGACAAGGTTTCATCCCTGTACGGTCATGGGGTCTGTAAG  
TGGCCGGGCTGTGAAGTTATTTGTGAAGACTATCAAGCATTTCCTTAA

>novel\_circ\_001770

GCTACTTCGCTGTTTGCAGCCCTGAAGCAGCAACAACAGCAACAGCAACCGCGCGAC  
ACTGTCCCCTCGTCGAGGGAGCGCGTCGAGAATCGAGATCGAGATCGATTGTCCGTCC  
GTAACCGTGAGAACAAACCGGAACGAGATAGGTGGTGGCGTGACGGAGCAATCGCAGC  
CAGCGCAGCAACAACAACAGCAGCAGCAGCAGCAACAGGAGCTCACGATCGAG  
TATCAGAGCAATGGAAAGCTCAGTCCCGCTGGGCACGCAGTGACAGCAGCACCCATG  
ACCCAGCAAAAGCAGCCTATCATCACGCAGCAATCGCAACAGCCGAGCTCGGGGGCG  
CCTGGTCCCCAACCGAGTCCTCATCAGAGTCCGCAGGCCCTCAGAGGGGTTTCGCCGC  
CAAATCCTTCGCAGGGTCCCCCGCCGGGAGGGCCGCCAGGGGCACCACCTTCGCAAA  
ATCCCTCGCAGATGATGATCAGCCCGGCTAGCGGCATCCACCAGATGCAACAACCTGCT  
GCAACAACACATACTCAGCCCCACCCAACTGCAATCCTTCATGCAGCAACACTCGCTC



TATTTACAACAGCAACAACAGCAACATCATCAGGATTCCTCGTCGGAGCATGCGTCCAA  
TCAGGAACGATTTCGGCTACTTTTCGTCCCTTAAAGACCATCAACACCAGTTTCGCCGAG  
CTGGGCAGGAAGAAGCTGGAGCAGGCGATACAGCAACTGCAGGAACAGTTGCAGTTG  
AACGTGATCCAGCAGACGCATCTGTTGCAAACGGCGGACAAGAAGAAGGCGTCCGCC  
CCGCTTCAACAATTGGCGCTTCAACAGCAACGTCTGATACAGCAACTGCAGATCACGC  
AGAGCCAATATCTTCTTCAACAGGGTCTGGGTCTTCAGGGTCACAATCCTTCTTCGG

>novel\_circ\_001771

GCTACTTCGCTGTTTGCAGCCCTGAAGCAGCAACAACAGCAACAGCAACCGCGCGAC  
ACTGTCCCCTCGTCGAGGGAGCGCGTCGAGAATCGAGATCGAGATCGATTGTTCGGTCC  
GTAACCGTGAGAACAAACCGGAACGAGATAGGTGGTGGCGTGACGGAGCAATCGCAGC  
CAGCGCAGCAACAACAACAGCAGCAGCAGCAGCAGCAACAGGAGCTCACGATCGAG  
TATCAGAGCAATGGAAAGCTCAGTCCCGCTGGGACGCAGTGACAGCAGCACCCATG  
ACCCAGCAAAAGCAGCCTATCATCACGCAGCAATCGCAACAGCCGAGCTCGGGGGCG  
CCTGGTCCCCAACCGAGTCCTCATCAGAGTCCGCAGGCCCTCAGAGGGGTTTCGCCGC  
CAAATCCTTCGCAGGGTCCCCCGCCGGGAGGGCCGCCAGGGGCACCACTTCGCAAA  
ATCCCTCGCAGATGATGATCAGCCCGGCTAGCGGCATCCACCAGATGCAACAACGTCT  
GCAACAACACATACTCAGCCCCACCAACTGCAATCCTTCATGCAGCAACACTCGCTC  
TATTTACAACAGCAACAACAGCAACATCATCAGGATTCCTCGTCGGAGCATGCGTCCAA  
TCAGGAACGATTTCGGCTACTTTTCGTCCCTTAAAGAC

>novel\_circ\_001772

AGGTTGGCGGGGAAATCTTGGCGGGGACAAGGGGAAAACTGGAAACAGGCTGTG  
CGGCGGTTCGGCTTTCTCGGCGCAATAGGGTTCGAGGGGATCAGGGAAATGCAGAAGG  
TTACTAAGAGCTAGGGAACTTGTAGCCAACACATAGAAGTTTCGCAACACACACGGA  
CGCGCGTCCATAGACATTCCACACTGGCAAGCTCTCTCATACTCTGGGGCAAGTATCGT  
CTGGCTAATGTAAAAAACATGGGTGCACACAACGTGTTGTGTGTTGCTTACATTGCGAC  
TCTCCTTATTCCCGTAGGGTTAAAACGGGGGGAGGGAGGGGCTGGTCGCGGGCTGTAG  
GAGGCTGGCGAAGCAGGGGAGGAGGGGGGAGTAGGAGGGAGGGAGGCTGTATGATA  
CCACGGGGTTAGCATTGTTTTGTGCGACGACCACTCAGACTCCTCGTCAAAAGAGCTG  
CTAATGTCGGTGCGCGTCTACTGTGACGTCAATAACGCATGAGGCCAAATTGAAAAATT  
ATCACACCAAAGCGAGGACCGTTGTTTAGAAAGAGGGTGGCCTTCCTTCGTTCCAAAG  
ATCGTCGCTAGTTACGCCAGATAGCCAGACAGCCTAATTCACCCAATACGGTTAACTC  
GATCG

>novel\_circ\_001773

ACAAAAATGAATTGGAAGCAGCTCAGAATTTTCTAGAGCAAGCAGCAAGGACTAATCT  
CCATGAATTCTTGCAAAGACTTAGCAGCGTGCTTGTTACTGCTGCTGCAAGCCCTGTTG  
CTCGTATGGCAGCAGGTCTTCAGCTTAAAAATCAACTTACATCCAAAGATCCAGACCTA  
AAATATCAATATCAACAACGTTGGCTTGCGATTCCCTGTAGAAACAAGAGAATATATTAA  
GAAAAATATTTTTGGGGCACTTGGAACAGAGAACAAATAGGCCAGGTTCTGCACCACAG  
TGTGTTGCATATGTAGCAGTTGCTGAATTACCTGTTTCGTGAATGGACCAATGTTATTAG  
CTATTAGTTAATAATGTTGTAAATCCAAACAGTACAGAAATGTTAAAGGAGGCAACTCT  
AGAAGCCATTGGTTACATTTGTCAAGATATAGAAAGCGACGTTTTGGTACCTCAGTCTA

ACGAAATTCTCACAGCTATTATTCACGGTATGAAAGGATCTAGTACTTCGCATTATGTTTC  
GTCTTGCAGCTACGAGTGCCTCTACAATTCATTAGAATTTACCAAAGGAAATTTTGAG  
ATAGAGACAGAACGAACTTCATTATGGAAGTGGTATGCGAGGCGACGCAATCTTTAA  
ACACACAAGTTAAAGTAGCAGCATTACAGTGTCTTGTGAAGATTATGTCGTTATATTATC  
AATATATGGAACCTTATATGGCTCCAGCACTTTTTCCGATTACTTTAGAAGCTATGAAAT  
CAGATATTGATGAAGTTGCACTGCAAGGAATTGAGTTTTGGTCAAACGTATCCGATGAA  
GAAGTAGATTTAGCCATGGAAGAAGGTGAAGCCTCCGATGGTGGTTCGACCGCCGGTCA  
AAGTATCGAGGCATTATGCAAAGGGTGCTTTGCAATACTTGGTACCTGTTTTGATGAAG  
AACTCACTAAACAAGAAGAATTTCGATGACGAAGACGATTGGAATCCTTCAAAAGCA  
GCTGGA

>novel\_circ\_001774

ATTAATTAGCGATGTGGGTCTGGAAATTTTGCTCGACAAATTTTCATGGCGTACAAATCA  
AGCCAAAGTCTCTACAAGGAGAGGAGTTCATACTTGAGAGATATTTCTTTTTTTCTGG  
ATAAGATAATTCAATATATAAACCAAGCATTTTACGAGGATCGAAGCTTCAAAGACAA  
CAAATAGCTTTTGCAGCTCCTCCGGTTTGCAGTTGGCCTTGAGCTTCCTCAGATGCAAC  
CCCTTGCGCCTCTGCTTCTTGTCCACGGCTGGCAAAGCAGCCTCGACGAGATTCTCCT  
CGTCGTCTCGTCGTCTCCTCGTCCTCGTCCTCTTCATTCTCGCAGGCGTTGCTCTTGT  
TGTCGGGGCCAGCGATCTCCACGTGATACGCCGTGCCCCGGCAGACGATGGTTCTCCAG  
GGCGCCGCTGTCTTCTCGCTGGCAATATTGCTGAATGTTGGTCACAGCACCGCCCCCGG  
ATATCGTGCAACCCTTCTCCACCGGAGAATACGTCTCGATAAACCGGGCCGCGACTCG  
CAGGACATGACCGAAGTGGTACGTTGCTCAGTGTTCTCTTCCACACTTGTATGTCGGT  
GCTGTGGTGGCCACCCTCCTCGTCCACCAAAGAACTTTCGAAGTCCCTGTTCCCGAGC  
ACATCGCATCTCATGATGTCGCAGTAATCCGCGAGGCACACCGCATCCTCCGCCTGCGT  
TACAATTATTTTAATTATTTTTTATTTATAATTCATTTCGATCTCGTGGCGTAACAAACATTT  
CGAAATAATTGAGGACGATATTTCTCTGGGAAAAATACGATTGCTTATATTGATATCGAC  
GTATAATATCGAGAGAAAAGAATAGAATAAGATGATCGTCAACTATTTTGAATAAATCGT  
GAGAAGAGGGCGGAAGAAATTTTAATACCGTGTTAACGTTACTCTTGTGTCTGTTATCGA  
AGTGGGCATCCAAGTGTTTCTCCGCGTAGAAGGATTTGCCGCACAGGCCGCGAGGTCCA  
TTGCGATGGCCTGTGCTGATGTTTCGCCTTTTGCTGGGGCCGAAAAATGTCCCGACTTT  
CGTGGAACGGACACTCCAGCGGCAATTCCACTTGATGTTTCTTCAGGATTGGCATCCAT  
CTCTGAAAAG

>novel\_circ\_001775

CTTTTGCAGCTCCTCCGGTTTGCAGTTGGCCTTGAGCTTCCTCAGATGCAACCCCTTGC  
GCCTCTGCTTCTTGTCCACGGCTGGCAAAGCAGCCTCGACGAGATTCTCCTCGTCGTC  
CTCGTCGTCTCCTCGTCCTCGTCCTCTTCATTCTCGCAGGCGTTGCTCTTGTGTGTCGG  
GGCCAGCGATCTCCACGTGATACGCCGTGCCCCGGCAGACGATGGTTCTCCAGGGCGCC  
GCTGTCTTCTCGCTGGCAATATTGCTGAATGTTGGTCACAGCACCGCCCCCGGATATCG  
TGCAACCCTTCTCCACCGGAGAATACGTCTCGATAAACCGGGCCGCGACTCGCAGGA  
CATGACCGAAGTGGTACGTTGCTCAGTGTTCTCTTCCACACTTGTATGTCGGTGCTGT  
GGTGGCCACCCTCCTCGTCCACCAAAGAACTTTCGAAGTCCCTGTTCCCGAGCACATC  
GCATCTCATGATGTCGCAGTAATCCGCGAGGCACACCGCATCCTCCGCCTGCGTTACAA  
TTATTTTAATTATTTTTTATTTATAATTCATTTCGATCTCGTGGCGTAACAAACATTTGAAA

TAATTGAGGACGATATTTCTCTGGGAAAAATACGATTGCTTATATTGATATCGACGTATAA  
TATCGAGAGAAAAGAATAGAATAAGATGATCGTCAACTATTTCTGAATAAATCGTGAGAA  
GAGGCGGAAGAAATTTTAATACCGTGTTAACGTTACTCTTGTGTCTGTTATCGAAGTGG  
GCATCCAAGTGTTTCTCCGCGTAGAAGGATTTGCCGCACAGGCCGCAGGTCCATTGCG  
ATGGCCTGTGCTGATGTTTCGCCTTTTGCTGGGGCCGAAAAATGTCCCGACTTTCGTGG  
AACGGACACTCCAGCGGCAATCCACTTGATGTTTCTTCAGGATTGGCATCCATCTCTG  
AAAAG

>novel\_circ\_001776

ATAACTGTTTCGATACGTACGACGTATACGTATACGTGAAAGAAAGTGAAAAGAATG  
ACAAGCGTGAAGCAGTTTGTTCGCTTTGCACGTAGACTGGGCCAGATATCAGAGAGTG  
GAACAAAAGTTGTAAACCGGTTTCGTGAGATATGCGTCTACTCAAGCTCAACACAAATT  
CATAGAGGATGAAAATGGGAAAAAAATTTTCCCTTCACCGTTTGGGGATTTACGCCTT  
CCGATACCCTCGTTCATGAATACATATGGAAGAATGTCGAGACGTTCCCTAATCGCATC  
GCATTGGTAATATACGTGGCAAAAATAATTTTCCATCCAAATTATTTTGTCTGTATTTG  
GGAAAAATATAATGTGATGTTATATAACACGAGAACTTGCGAATGTGGGATAACCGGGA  
CAAATACACGTATGCCAAAGCGAGGGACGCGAGTAACTATATCGCGAGAAGTTTGAG  
GAATATGGGTTTGAAGAAAGGTGACTTGGTGCCCTAGTAGCGCCCAATTATCCGGAA  
ACGATTTTAGCTGCTGTCGGTGTCTTAGAAGCTGATCTTATTCTCACTACCATGAATCCT  
ACCTATACAATCGAGGAAATGAAGAAACAAATAAAGGATTGCGAGGCAAATGCGATCA  
TTACAGTTGCAGAAATTGCACATATTGTTCTTGAAGCAAGAAAAAATACTTCCGCGTCA  
AGTGGACCTTTTCGTGGTTATCGAGGATGGTACCAGATCTATTCCCGAAGGCAGTGTGCC  
GTTTAAGGATCTTATCACACGAGGTAAACATTACCGCCTATAACGCATTATCAAATGAG  
TTCGAATGATCTAGCCATATTGCCATATTCCAGTGGAACGACTGGCATGCCGAAAGGTG  
TCATGTTGACGCACAAGAATTTAGTAAGTAACATGGAAATGGTGGAATATACGACGAA  
AGAAAGGCTGTGGCGACATACGACTGCCGATTTTCAAGAGGTAGTACCTCTAATTATAC  
CCTTCTTCCATATTTTTCGGATTGAATGCCGCGACGTTGCCTCGTCTCTACAACGGTACAA  
AAATAATCACACTTCCAAAATTCGTGCCGGAAGTATTCGTGGACATTTTGACGAAAAA  
AAATATAACAGGTTTGTTCGCAGTACCATCTTTGATCACGTTTATAAATATCTGCCCTTT  
GCTTAAAAAGGAGATTTTCCAAAATATACATCACATTATCACCGGTGCGACACCATTAC  
CGGAGGTGGATGTGGAGAGATTTTACGAAAGATATCAGATAAGCAGCGATGACTTGAA  
ATTTTCTCAAGGATACGGGATGACGGAACTTCACCAGTGATTTGCTTAGATTTCGTGGA  
GTCGAAAACCATCAAGTATCGGGCAAAATATTGCCGTTTGCGAAATACGATTAGTCGAT  
TCGGCAACGAACGAGGATATCTCTGTAGCTGGTCAGAAGGGTGAAATATGGGCAAGGG  
GGCCTCACATCATGAAAGGATATTTAAACAACGAGAAGGCGACGAGCGAGATGATCGT  
CGACGGTTGGCTGAAAACTGGGGACATTGGTTATTTTCGACGACGAGTTTATTTCTTCG  
TCACGGATAGGAAGAAAGATTTGATCAAAGTTAAAGGATTCCAGGTACCACCAGCCGA  
GTTGGAAGCTTTTGATAAAAAGACATCCAAATGTTATCGAGGCAGCTGTGATTGGTATTC  
CAAACGAAAGGTTTCGGCGAGATACCTAAGGCTTTTCGTAATTCTCAAGGAAGGTAGCAA  
AACGACAGATGACGATATCAAAAATTTTGTAAGAACAAAGTGTCGGAATACAAGCAA  
CTCAGAGGAGGAGTGACATTCGTTGACAGTATACCAAAGAACGCATCCGGAAGATTT  
TACGAAACAAATTGAAAAACGAGTACAAATAGTAAAAGTTTATGCTGAAGAGTGAAGA  
AGAAAATTTACGCTCCGAGGCCCTCGATTTACATCTCGTACCGTAATGGGATCAAGAAT  
TATCGATTAAGAAAGGGTACGATATATCGTTTCTGTATTTCTGATTGGCATAATGAATGGC

ATATGAATTATTCAACTGTTATATTGATGTATGGTGAAAGATATGCTAATAACGTTTTTTC  
ACTTTGTTTTATGTATAATATTGTTATCTCATAAGTGTTTTACAAGTGCTCTTACTGAAGT  
GTCTTATTGATTACGACAATTTTTTTTAATATTTTTACATTATATATACATATATACATATAT  
CTATTTTGAAAGAATGGGTTTAGTAAAAACATATATAAATACCGATGTACTTATTAGAAT  
AGCGGGAAATAGCGGTAAAAAGAAAACGTGATTACGAAGTACATTTTTTAAAATTATATA  
CGTATATCCTTTTATTTTTTAATATCATTTAATATACGCAAATATTATCGGTTGTTGTGCAAT  
ATTTGACAATGCAATTAATTTTTTAAGATTATTTTTTAGATTATTAAATTTTTATCGATTTTTT  
ATAAACATTGTGTACAAGAAAGTTACAGGGATTTTAAACTTTTTAAACAATAAAAAATCTT  
TTATAGTTTTACGGTTGTGTTATAAATAATTGTTATAAATAAACATTTTTCAACAAGCATG  
TCGGATTATTTAAAATTCAATATCTTTACATTCTGTTTTAAATAATTCTTAACCACTACTGA  
TTTATTTTGAATGTTACATATGTTAATTTATGTCTGTCTATCGTTTCATATTATCTCGATTTC  
GATCGATTAAAATCTTGAAATCAATTGAACCATCATTTTTGTTTTATTTATACATCATTAAT  
AATTTATCTGATGTTTCATTTCGATTAAATATTTACTATCAGAATACTGCATCGCTTCATACC  
TTGTAAACTAATTTTTCTTTAATTATATTTTATAATTTATGTTTCGAAATAGAATAGAGAT  
AGATATCGCAAGATTGCAAGTTTTTATTGTCATAGAATAAAGATAAAGATAAATTAAATT  
GCATAAAGATTAATTAAATTGCAATCACTTAATAAAATAGATAAAAAAAGAAGAACTTAT  
CAGATCATACTTTTTTAATTTTAAATTCAAATGAACGATACGATCTATATAACTTCACACA  
TAGATAATTTCAATTATATCTATGAAACGGATGTCATGAAATTTATTACCATCTCACTCA  
CGTTTTGCAAATAAAATTCCTAGAAAAATATAAATAACATATTTCTTCTTCGTCTTT  
CCTTTGTTTCATTCTCTCCGATCTAACTCTTTAAATTGTTCTTCTTCTTACTTTATCATCA  
TCAGTGTGATAACTATCACGATAAAAGTTAATTCCATTTCGAACGATGCGCGATGCGATT  
GTTCTCGAGATCTTCGATTCCCATTCTCTATTTCTTCTTATTACACGCATTCCGTGTGAA  
TTGTACGGTAATCGCCAAATCTGCATCCCACCGACTTCCCGCCATCCGAAAACGTTTTTC  
GAATTAAGGTTCCGCGCGTGAATTGTCTGCGTGCCCGTCATTTAATTCCTTCGGGATT  
GCTACCACCGTTGTTACCACCGTTCTTCGCCTCCCCAAATGCGCCCAAATACGAGTCTC  
GAGCTTTCGAGCTTTCCTTCGAGGCTGGGCCCCTCGTGCCAGGGTGAAACAGGTGAA  
GGTGGCCGGGCTCGAATCGATGCTTGGAACAGGCGAGGAGGAGGAGGGGGATGAAG  
GGTCGAATGGAAACAGACAGAGCTGCTTTCCAACCCCTAAACGCGTGCGCTTTGAGTGC  
GTGGTTCGATCCCTCGGGGAAAAGAGATGAACTGTGCTTAATCCTGTTTCGTCGGATA  
GAAATGCATTCAACAGGGATAAACCGAAGAACCGGGTTGACGAAGCCAATTTCTTATA  
TTTACTTTAAACGAAAGTGGAAGATATTTCGAGGGATGAGGAATTAGAGGAAGAGTGG  
AGTATAATAAAGTGAACGATGTAGTTAGCGTTTGTTTATTACAACCTCTTCTTTTCTTTT  
TATTATGTTTGATAGGGTTTACCTGTTGATCTCGTGTTTGTTGGAACGAGAAGGCAAATT  
AAAATACGTTGGTAATAATACGTTAGCAATAGAATCAAGAAATGGGAAATCTAACTCGC  
CTCGAATTGTAATTCTCTCCAATTCCGTTTCATTCCATTTTATTCTATTACAGTTGCGTTT  
TTTCCAAAATTCAAAATTTCTTACACTTCGTGTTTCGCGCCTTTAATTATTTTCGATTATTT  
TTAATTGTAAATTAGTTACAAAAAATAACAATTCTTCTCGCCGCATCGTTTAAATGG  
AAATTCTGATCACTGTTTGCCACCGTTTCGTCATGTATTTTTTTTCATCAAAAATATATT  
TCTTCCGTATATTTTATAAACACGATATACATTCGATCGAAATTTATGACCATCCCGAT  
ATATCCCCCGATATTTCTATTTTCCATTCTCCCTTTCTTATGGCAAACATTTCCATCCG  
AGGAAATGAAGTTTTTCAAGACAAGTGACAAGCACAAAGTTGTCGCGCGCCCTATCCT  
GGATCCTGGAAGTAAAGTTTCCTTCGATTGGAAACGTTTCATCGGTGGGAACCCCCGTC  
GCGTAAACGTTGGGAATTTATTTACGGGCGCGTTTCAGTTTTCCAAGCGATTACCCGGC  
ACGGTTCGCGTTCGATAGAAAATAGTGTTGCCCGGGCGGAAATGGACGCAAACAAATC

AATTGGTTTTCCGAATGAAATCAAACAAGCGCGGAGACATTCCACCCCATCGACGAG  
CGACCATCCTCCTCCTTGTCTCTTTCCACGCCGCTCGCAGGCAAAGAGAGGATTG  
GAAAATGAAAAATAGGAGACAGAGGAGGCTGCACCGTCGTGACACCCATTTTTCCCT  
CTCTAGCTCACTGTTTCTCGCGTTGCCAGTCTTCTTCTTCTTCTTCTTCTTCTTCCAC  
GATTTTTATTCTTTTCCTCTCTCGACAGTAGTCACGCTCTACTAACGATAGATCTCATTG  
AATGACAGTGAAAAGTCCACCTCCTTTCTTCTTCTTCTTCTTCTTCTTCTTCTTCT  
TCTTTGCTTTTATTCTGCTTGCCTGGATGACTCGACGCGATTATCAGTGTCGTTGACG  
ATTCGAAAAAAAAGAATCATTGAAAGGGGAAGGGAGGATGAAAGTAAAGAAATTGCT  
TCGAAAATTTTAGTTTCTCTTAGCAATAGATTTTACTTGGATTAAATTGTCAAACGTACA  
AATTGTACAAGGATTCATTTGAAATTGACGAGAAATAAAGAAAAAAGAGAATATAGTT  
ATCAAAAGCAAAGTTTTTAAAAATACGCACCTCTCTCTTAGAAGGGAACGTGTCTGTCT  
GTCACCTCGTGAAATATAGATGACACGCTGTGAGAGGAATTTAGTTGCGAGGTTTCGCG  
GTTGAAGAGAGGGATATTCTTCTTGGAACTTTGTGCTGGAGTTGAATCCGTTCCAATGT  
TGGACGTTTTACATAGTGCAAAGTGGTGTCAATTAGGCTCGTAATATCGTCTTCTAAAA  
GAGTTGCTACTCTCCGTGGCAATGATTGTCTCTATTTCTCACTATCTAAAATTTTCATCGA  
GTTCTGCTTTCTCCCTCTCCAACCTTTACTTTATCCCTAAAAACTTTTCCCTTTCGAACTT  
TTATCCCGTAAAAAAGAAGGATATTCGAACAAATTGTAATTCGACAATCAAAGGGCG  
GATTAATTTTAAGAAAAATAATAACAATAATAAAAAAAGAAAAGGATCATTCATAGA  
AAATTTTTTACTAATCAGAAATCTTCACTTTCAGGCGCGATTGAATCCGAGATGAAGCT  
TGGCTCGTTCAACCGAATCGAGGTTTCGCACAAACCCCGTTGGATCGTTGAGTCGAT  
GCCGGATAAATTTATTTAAGTGTCTTCCGATACCTCGATTACCATGCTCGGTGCGAAA  
GGAGTAATAGCAACTGAGAGACTCGTCTGGCAAGTGTCTCGTTTGTGGTAAGAATTC  
TTCGTTTCTTTCTTTTCTCCTCTTTTCTTTTTTCTTTTCTTTTCTTTTTTTTCCAGTGACCC  
GACGCTGTGTGACGCGATTGAAAAAAGAAAAAAGGAAAAGAAGGTAGAGGC  
GCGAGAAGAAAGGGATTTCCGGGCGCATATGAAATGCACGAGTGACGGGAGGGGAGA  
AAAAACATCCGTCACCTTTTATTTATTTTCTAGAGAGGAAG

>novel\_circ\_001778

GTGTAGTATGGAGGCCTGTAGGATTGTCACTAGTTTATTTGGCTCTGATGCTATATTCGC  
CCCACGTGCCAATACCGGACTCAAAAACAATGGCCGGCCACACGGGGCCACTATTTAAA  
AACTTGCATCGGCCTGTCTTTTCTCACAACAACCAGCCAAATCACTTTCCACATAGTTT  
TACTGGCTCTGCCCCTTACGGACACTTCTCCACAATTGCGAACCTATGGAAGTGATC  
TTCAGACACTTAGGTTTCGTAAGGCTAGATAGCGCGACCGAGTGGGAGATATCTTCTG  
GTTGACACCAGAATTAATCGTCCTACCCACTAGTACAATAATATATTTTCATATGTCGTTTC  
CTATCGCAAAAAACCATCACCGAAGAAGGAGACGCCTCATTGCATCAAAACATCGAGG  
CCTCTAAGAAAATCGTAGATGGAAATATTAAGATCATCAACTTCTTAGGACGCATAGGT  
ACTTACGTGGTACTGGCATCGTTATGCATCGCAGCATCTCTGAAACCTTCGATCGAAGG  
CGGTTTCTATTTCTCTATCTTCTTGGGAGCTTCGACCTGGTGGGCGTGCAACAAAGAGC  
TTCGAAAAGGGTTCGCCAAGCTGTGCAGGATCTTGATGGCGGTCGTGGTACTTCATATC  
CTGGTTCTGCTCAGCTACCAGAATCAAATACCTCAAGAATTAATACCCGTGAACAGCAC  
TTGGCAACGATACCTTGCCCTGATTCCCGTCTATCGAATCAACTGCTCGAATCCAAGAT  
ACGTGGAATACACCGATTATACAGATTGGCTGATTACGGATACTCCCTGAGACTGTTCT  
GGCTTTATTTCTGTTCTGGCGTTGCAATCACAGTTCCTCAGCAAAAAGCCG

>novel\_circ\_001779

GTTGGGTCCAACAACGTGTTGGGAAGTAAGTTCTTTCAAGCATTACAGCGTTGTCCAG  
GATAGGTACATTAGCCTTTTGAAGGATGTTTGGTAAGGTTGGTTTTGCTGTTTTAGAGAT  
TGATCCCCATCCAGAGAGAACAGCTTGTCCAGTTTGTCTCTCCTTGTTGGGCAGGG  
TAATGGGTTGTACCAAGTTGTTGAATTTCAAGGGGGAGCTCAGGACGAGAAGAGCGAT  
ATCGTGTTGCGCAACTCCGCTAAAATAAAATAAAGAAAATTATATTAGTGGAGCACGAG  
CGATAACGATTTTATTCCAAGTCAACAATTGAAAGATCGCCTCTCTTCTTATCTCGTCTC  
ATTTTTTTTTTTTTCGAGAATGGGAAATGTCGAGACGAGATTACGTATCGTCTTTCTTGA  
TCAACGAGAAAGAAAACGACGAAGAAAATATTTTGATATATCTTTTAATAATATTTGA  
TTTCTATTTTAGTTTTTTAAACATCATCAATTCCATTTTCCCTCTCTCTTTTTCTTCCT  
TTTTTTTTTATTTCAACAAATTGACCATCAAGTTTTAAATTGATTTTATTTAAACACGAG  
ATTGGAATAATTCTCTAATCTAAGATGAAATAAATTTTGCTCACCCTTTGTACCCTTTGT  
GAACGATACTCTTGCCACGTCAACGACTTGTTGAGAAGATTCAGTCTTGCCAGCTC  
GTATTTCCCGGAATAACTCTAGATTTTCCAACCTTCATAATACAGTGTCCCGCGGTCAG  
GACGTATCTTTCGTTCAAGGATGGATCCACCACACGAGTGGCTGTATTGAGTTAAGG

>novel\_circ\_001780

ATTTACGGTAGGAGAGAATATGGTGTACAACGAGACGGAAGATGATTTAACAATCGATA  
ATGAAATCAGAGGATTCTCTTTCTCGAACATCGTCGATTCTGTGTTACCGTGATGGCT  
AACGGACTCGATTCCATCGTGACTAGTATCATCGGCACGGAGAAAAGTGGCAAGCCTA  
AACCCAACCGAGTGAATTACAAGAATTATCAATTGATCAGATTGTTCCCTAGTTCCCAA  
GGCCACGTGAAGGAGTTGAAGGAGCTGAAGGAGACCGAGACCGAGGATATTAAATTT  
TGGAGCGAGCCGATGTACAACAAAACAACCGACGTGGTCGTCGCCCCAGATCTTGCT  
CCGAACGAAAATATTCCTTAGAGACAAAGGAATCGATTTCAAAGTTCTGATAACGAAT  
ATTCAGAAAACGATAGCGAATCAAATCCAAAAATGTCGAAGGAACAACGCGATGATC  
TGGTCTCGAGCCAGGGACACAGTATGACTTGGAACGATATCATCGGTATGGAGAGAT  
CGTCAGGTACATGGAGTATCTAACTCTGAAGTATCCTAACTGGTCGAAGTGATAACGA  
TAGGTACAGTTACGAGGGTCAACCCATTAAATGGTCAAAATTTTGAACGGGCGAAA  
CAAGAAGAATGGATCCAAATCGGCTGTGTGGATAGACGCTG

>novel\_circ\_001781

TCGCACAATGACTCCGCTTCATCGTGGACCGAGAGGAGCATAAGTCCCGGAAGCGCGG  
TGGTGAGCAGCGCGTCGAGGCCTCAAACCTCCGGCATTTCCTGTGCATCCCCGGACCCC  
GTACGTGAACAACTCGTCGCCCACGGTCACGTTGCGGGCTGATCGCTCATACAGCACG  
AACGCCACGTACAACGTGAACAACAACAATAATTTGAATAACGTGAGGCAGCC  
GGGAACAACAACAACGTCGGGAATTACGCGAGCGAACGAACGATCTACATCGAA  
GAACGAAGAGAAGTCTCGAAAGAGACGGGGCTTCCACCCAAGAGTCCGACAACACA  
GAG

>novel\_circ\_001782

TCGCAGTCGAGGGCAGCGCTTTACACATCCGCGCCGGCGAGCCCGTTGCTTCCGCAAC  
GGTCGAGCAGCCGGAAGTACAACGGTACCACCGGAACCGGTACCCTGGGACGGCCGC  
GGGCCGAGAGCGTGAACGAGCGCCCCTTCATGTCCGTGAAACGGGCATACGAATATCG  
CAAATACAGCGACAACCAGAGCCCTCCGACATCCCCCGCTCAGGCTTAGCAAGCACG

CGACCCCTTAGGATTAGCAGTGCAGCTACAAACACCGTTCATTAACACGGACAAGCCTC  
AACCACCGAGGCCAGAGTCGCGTAGCGACAGCTTTGCTCGCGCTGACGCTTTGTTGCG  
CGAGCACAACAGGCAGCAGCAGCAGCAGCAACAGCAGCAGCAGCAGCAGCAGT  
TGGCCGCGAGCAACGCGGAGCAACAGAAACAAGCAACGATTGGCCAAGATTTGCCA  
CGACCATGCCTCGTAACACTCGACCGGAATCGAGAAATCGAATCGTGTGTTTGAGCTC  
GACCACGTTGGCCGGGAACGTTGAGAGGACCGCCGACCACGTGGACGGAGGATTGTT  
GACGATGGTCGATCAGCAACAATCGAGCACGCGCAACAATCCGGACCCTCTCGTGAGC  
CTCATTCATCATTGGCTGAAATTTCGCCCATTTCGATCATCCCATACGGTGACTAACAAC  
AACAAACAACAGCAACAGCAAGACAGACACGAACGATCATCATGCGCCGAGTAGT  
ATAGGCGCAGCAACCACGACGAATGCGAGCAGCAACGTTGTAAACGCCATCACTAATT  
GCTCCCCTAACCAGTCGCCCAAAGCATGGCAGAATTGCACCCAGTCGCACAATGACTC  
CGCTTCATCGTGGACCGAGAGGAGCATAAGTCCCGGAAGCGCGGTGGTGAGCAGCGC  
GTCGAGGCCTCAAACCTCCGGCATTTCCTGTGCATCCCCGGACCCCGTACGTGAACAAC  
TCGTCGCCACGGTCACGTTTCGCGGTGATCGCTCATAACAGCACGAACGCCACGTACA  
ACGTGAACAACAACAACAATAATTTGAATAACGTCGAGGCAGCCGGGAACAACAACA  
ACAACGTCGGGAATTACGCGAGCGAACGAACGATCTACATCGAAGAACGAAGAGAAG  
TCTCGAAAGAGACGGGGCTTCCACCCAAGAGTCCGACAACACAGAG

>novel\_circ\_001783

ATTATCATGGCTGAGGCAACAGCAGTTGAAACTTGCCGCGAGGAGGGATGAAAGAAA  
CCCGGGGAAACTTTGGCGACAAGAAACCGGAAATCGCGTGATCGGCGAGCTGAGAAG  
CTTGCAGAGGGGAAGGATGAGGCACGACGGGTACGCCAGCGATTCTGCCGTTCTTGA  
CGACGACGAGGACACGTGGCTTGTCATTTCCACTTCCGGCCAGTCGCAGTCGAGGGC  
AGCGCTTTACACATCCGCGCCGGCGAGCCCGTTGCTTCCGCAACGGTCGAGCAGCCGG  
AAGTACAACGGTACCACCGGAACCGGTACCCTGGGACGGCCGCGGGCCGAGAGCGTG  
AACGAGCGCCCCTTCATGTCCGTGAAACGGGCATACGAATATCGCAAATACAGCGACA  
ACCAG

>novel\_circ\_001784

AAGGACGGGAAACTCCATTATCACCGCCACCACCTTCGAGCTCCTCCGTTTCAGACGTC  
GCCTCGCGGATTGGGTTACACCTGCGGTCCCATAGATGGATCCCTGTACGCTGTGGTAC  
ACCAGGGTGCTGCCGGTGGTGCCCGTGGCTCGCCATTGACAGTTTCCATGGACAGCGG  
AATTAGCAGCGCCCCGCGCAACGACCTAGCCCACCCGAGCCGGAGCCGGACAACCA  
GGCTCACGGTGATCTCGATAAGCTGCTCCATGATATGATGCTCACCGTCGAGTCGATGC  
CGGATCCCCCAACGGAGGATTACAGAACGGACAGGAGCGAGAAGATGTACATTCAAG  
AAACTCGCAGCTACAGCAGCCACGCGAGCAGCCATTCCCCGTCCACCTACTCGACGCT  
GAAGGATTTCGTACAGGAATTACAGCACCGGGAAAGATTTCGAGCCCCCGTACAACCTCG  
AGCAGCAGTTACAGCACACTGAAGAACGAATACCGCGAGCCGTCAACCAAGATCGAT  
CATCGAAGGGACGAGTTCGAGTATCGGGTATCGCCCGACCGGAAGATCACCGAGTCGT  
CGACCGATCCGTACAGGAAGCACGGTGATTTCGTTCTCGCCACCCGGGAACATCGATTA  
CATAGACGAGGATATACCTTATCACGCGAGGCAGACGAGTCAACCGTTCTCTTACGGCG  
CCACCACCGACATGCTCAAACATCAGAACTTTCTCCCCCTCTTTGGTGAGGAAGGC  
GTCCGTACGAGGCGCAGCGCCCGTCGTCGACTTCGAGGACATCCTCGGGGAGAACTC  
GAGGAGACCTGTACGCCCTTTGAGCCCCAACACCCCAGATCCTCCGCCAGAATTCGCC

AACGGGTCTGCTAAGAACGCCTCGGATCACGTGGACGG

>novel\_circ\_001785

GTACATCAAATATTTACGCGGACTTTTATCAGGCTCCTTAAGGATCAGCCAATCCCCGCT  
CTATTTAACGCATCTCACCGTGCTTGGCGTCCCCTGTTTCGAGCCACGGGTTGCCGGG  
CATTCCTCAAGGTCTACGAAGGTCTGAACCCCGTCTACACCTCGGATCTCTACTCCGTG  
ACGAATGCACGCGAGTTCACCGTGAATCTCGGTGGTCTACGCCTGAGGGGAGACATTC  
TGGTGAAATGTTACCACAGAGTGTACTCGAAGCAGAGCCGGAAGTAATGTTTTCCCT  
GCAGTTCCACACCTGCGTGATCACGGAGAACGTTGTTTCCTTTCTCGATCGGAGCTC  
GACGTCGCCTGCGACGATCCAAGGTGTCCACCTGACAGCGTGGTCACGCTGTACTTCG  
CCACGGACGCGAAACGCCAGGACGGGCCTGTACCAGCGCCGACGCCCCGCGTCCCCC  
ACGCCTCGGCTCATCACGACCCCATCCTCCACTGGGACAGCTACACGAATCTCGAGAT  
CAGCGACGACG

>novel\_circ\_001786

ATTCAGACGTCTCTGTCGACGACGACACCCGCGAGGACGCCAGGCGTCGGGGCGGAC  
GCGACGACGACAGGAAGCGGGAAAGGCGGTGGCCGTGTTACGGAAGTGATGGAGCTT  
TGTTACGTCACCGAAAGAATCATCGCGCTCTGGTACAGGGAGGATGCGCAGGGAGTCC  
TGGAACACGCCACCGCTCTTCTGCGTGGAAGCACGCTGATAATTATATGATATTCAAT  
CTCTCGTCGCCGGGTCTGTGCGGGGAGCCGAACACGAGGGAAGCGGGATGGCCTCAG  
GGTCTGGCGCCAGTTTGGAAGATTGTGCGCCCTGTGCAAGGAGCTGGACTCCTGGC  
TGAACGGGGCTCCGAATCGCGTGGTCTCCTCCACGCCAGGGGAAGCAAAGAACGAT  
TGGGTGTGGCTGTGTCCGCTTACATGAACTACAGCAGCATCTGCGGCGGACGTGATCA  
GGCGTTGGACAGGTTTGCCATGAGGAGATTCTCTGACGACAAGATTGGATCCCTGCAG  
GTTCCCTCGCATCGAAGGTACATCAAATATTTACGCGGACTTTTATCAGGCTCCTTAAG  
GATCAGCCAATCCCCGCTCTATTTAACGCATCTCACCGTGCTTGGCGTCCCCTGTTTCG  
AGCCACGGGTTGCCGGGCATTCTCAAGGTCTACGAAGGTCTGAACCCCGTCTACAC  
CTCGGATCTCTACTCCGTGACGAATGCACGCGAGTTCACCGTGAATCTCGGTGGTCTAC  
GCCTGAGGGGAGACATTCTGGTGAAATGTTACCACAGAGTGTACTCGAAGCAGAGCC  
GGGAAGTAATGTTTTCCCTGCAGTTCCACACCTGCGTGATCACGGAGAACGTTGTTTC  
CTTTCCTCGATCGGAGCTCGACGTCGCCTGCGACGATCCAAGGTGTCCACCTGACAGC  
GTGGTCACGCTGTACTTCGCCACGGACGCGAAACGCCAGGACGGGCCTGTACCAGCG  
CCGACGCCCGCGGTCCCCACGCCTCGGCTCATCACGACCCCATCCTCCACTGGGACA  
GCTACACGAATCTCGAGATCAGCGACGACG

>novel\_circ\_001787

CATAATGGGGGTTACGAGGCGCAACCGAAGAATGTTAACACCATCTCGAGAAGCAAGC  
AGCAGCAGCAACAACAGAAAAGCTCCGCTTCGACTCGAGCGCCGAGCAAACCGATGT  
CGATTTCGTTACGAGATTCCCGTAGGGACGACATGCCGGACAACGTGGTCGTCAGGATC  
GTCTACGCGCCGAAATATTCCAAGATTACAGCGTCCTCGTCGACGACGACACCCGCGA  
GGACGCCAGGCGTCGGGGCGGACGCGACGACGACAGGAAGCGGGAAAGGCGGTGGC  
CGTGTTACGGAAGTGATGGAGCTTTGTTACGTCACCGAAAGAATCATCGCGCTCTGGT  
ACAGGGAGGATGCGCAGGGAGTCTGGAACACGCCACCGCTCTTCTGCGTGGAAGC  
ACGCTGATAATTATATGATATTCAATCTCTCGTCGCCGGGTCTGTGCGGGGAGCCGAAC



ACGAGGGAAGCGGGATGGCCTCAGGGTCTGGCGCCCAGTTTGGAAGATTGTGCGCC  
CTGTGCAAGGAGCTGGACTCCTGGCTGAACGGGGCTCCGAATCGCGTGGTCGTCTCTCC  
ACGCCAGGGGAAGCAAAGAACGATTGGGTGTGGCTGTGTCCGCTTACATGAACTACA  
GCAGCATCTGCGGCGGACGTGATCAGGCGTTGGACAGGTTTGCCATGAGGAGATTCTC  
CGACGACAAGATTGGATCCCTGCAGGTTCCCTCGCATCGAAGGTACATCAAATATTTCA  
GCGGACTTTTATCAGGCTCCTTAAGGATCAGCCAATCCCCGCTCTATTTAACGCATCTCA  
CCGTGCTTGGCGTCCCCTGTTTCGAGCCCACGGGTGGCCGGGCATTCTCAAGGTCTA  
CGAAGGTCTGAACCCCGTCTACACCTCGGATCTCTACTCCGTGACGAATGCACGCGAG  
TTCACCGTGAATCTCGGTGGTCTACGCCTGAGGGGAGACATTCTGGTGAAATGTTACC  
ACAGAGTGTACTCGAAGCAGAGCCGGAAGTAATGTTTTCCCTGCAGTTCCACACCTG  
CGTGATCACGGAGAACGTTGTTTCCTTTCTCGATCGGAGCTCGACGTCGCCTGCGAC  
GATCCAAGGTGTCCACCTGACAGCGTGGTCACGCTGTACTTCGCCACGGACGCGAAAC  
GCCAGGACGGGCCTGTACCAGCGCCGACGCCCGCCGTCCCCACGCCTCGGCTCATCA  
CGACCCCATCTCCACTGGGACAGCTACACGAATCTCGAGATCAGCGACGACG

>novel\_circ\_001788

GGTGCTAGATTCCGGGACACCTCGCAGCAAATCCACAAGCAATGGCAGGCGGATCCGG  
CACGAGCGTTTCCAACAGTTGGCACGGTCGCCACCGCAGGCTCGATCTCACCGACGTC  
GGGCGAAATTTCAACCCCGAATTCGACGCCCAGCCCAAGCCCCAGCCCCACTAACAGT  
CAACAAGTCGCGCGAGTTCCGTGCGCTTTTGCCATCGAACGTGCCGCGCGTGTCTGTCC  
TTTCTCGCGGTTTCGCTTTTCCACGCCTCGCCTTCTTCTCGAAACAAAAAAAAAAG  
GAATAGAAAAGAGTCGAACGAGATTAGGGATAAGTTCAATTCGGGCGATGAACCATGC  
ACTTCCGGTCGAACGTTGAAGATGGCTCGATCGATGATACGATCGAGAGTACATGGTGA  
TACGAGAATACGAAGATTCCTCGATCGTTGGAGGGGGTGGCGAGGTAGTGAGAGTTGT  
GTAGTGTGTTTCGAAAATTGATCGGCAATCAATTGTTTCGTGGGTGACAGCTGTCAACA  
TGCTGTCCACCGTTTCAAGTGCATGGTGACGTGCATCAACGGAACCTATCACGTCGCGTAT  
ACGGGCGACGTGTATCGACGAGCTTATCCAAACGAGCATGACAACTCGAACAGTAGC  
TCGCTGTGCGCGTCTGGCTACGAGCAAATTGCTGCCGTTGCGGTGACACGAGGCAGG  
ACACCGTGAACAATAACCTCAAGGATGAGACACCACTGCGGGAGGAGACCGAGACCC  
TTTTGCATCGTATCGCATTACCGTTTGGCACACTGCCCTCCATATAGAGAGCGAGCAT  
AATGGGGGTACGAGGCGCAACCGAAGAATGTTAACACCATCTCGAGAAGCAAGCAG  
CAGCAGCAACAACAGAAAAGCTCCGCTTCGACTCGAGCGCCGAGCAAACCGATGTCTG  
ATTCGTTACGAGATTCCCGTAGGGACGACATGCCGGACAACGTGGTCGTCAGGATCGT  
CTACGCGCCGAAATATTCCAAGATTCAGACGTCCTCGTCGACGACGACACCCGCGAGG  
ACGCCAGGCGTCGGGGCGGACGCGACGACGACAGGAAGCGGGAAAGGCGGTGGCCG  
TGTTACGGAAGTGATGGAGCTTTGTTACGTCACCGAAAGAATCATCGCGCTCTGGTAC  
AGGGAGGATGCGCAGGGAGTCTGGAACACGCCACCGCTCTTCTGCGTGGAAGCAC  
GCTGATAATTATATGATATTCAATCTCTCGTCGCCGGGTCGTGCGGGGGAGCCGAACAC  
GAGGGAAGCGGGATGGCCTCAGGGTCTGGCGCCCAGTTTGGAAGATTGTGCGCCCT  
GTGCAAGGAGCTGGACTCCTGGCTGAACGGGGCTCCGAATCGCGTGGTCGTCTCTCCA  
CGCCAGGGGAAGCAAAGAACGATTGGGTGTGGCTGTGTCCGCTTACATGAACTACAG  
CAGCATCTGCGGCGGACGTGATCAGGCGTTGGACAGGTTTGCCATGAGGAGATTCTC  
GACGACAAGATTGGATCCCTGCAGGTTCCCTCGCATCGAAGGTACATCAAATATTTAG  
CGGACTTTTATCAGGCTCCTTAAGGATCAGCCAATCCCCGCTCTATTTAACGCATCTCAC

CGTGCTTGGCGTCCCCTGTTTCGAGCCCACGGGTTGCCGGGCATTTCCTCAAGGTCTAC  
GAAGGTCTGAACCCCGTCTACACCTCGGATCTCTACTCCGTGACGAATGCACGCGAGT  
TCACCGTGAATCTCGGTGGTCTACGCCTGAGGGGAGACATTCTGGTGAAATGTTACCA  
CAGAGTGTACTCGAAGCAGAGCCGGGAAGTAATGTTTTCCCTGCAGTTCCACACCTGC  
GTGATCACGGAGAACGTTGTTTCCTTTCTTCGATCGGAGCTCGACGTCGCCTGCGACG  
ATCCAAGGTGTCCACCTGACAGCGTGGTCACGCTGTACTTCGCCACGGACGCGAAACG  
CCAGGACGGGCCTGTACCAGCGCCGACGCCCGCCGTCCCCACGCCTCGGCTCATCAC  
GACCCCATCCTCCACTGGGACAGCTACACGAATCTCGAGATCAGCGACGACG

>novel\_circ\_001789

ATTCAGACGTCCTCGTCGACGACGACACCCGCGAGGACGCCAGGCGTCGGGGCGGAC  
GCGACGACGACAGGAAGCGGGAAAGGCGGTGGCCGTGTTACGGAAGTGATGGAGCTT  
TGTTACGTCACCGAAAGAATCATCGCGCTCTGGTACAGGGAGGATGCGCAGGGAGTCC  
TGGAACACGCCACCGCTCTTCTGCGTGGAAGCACGCTGATAATTATATGATATTCAAT  
CTCTCGTCGCCGGGTTCGTGCGGGGGAGCCGAACACGAGGGAAGCGGGATGGCCTCAG  
GGTCTGGCGCCAGTTTGGAAGATTGTGCGCCCTGTGCAAGGAGCTGGACTCCTGGC  
TGAACGGGGCTCCGAATCGCGTGGTCGTCCTCCACGCCAGGGGAAGCAAAGAACGAT  
TGGGTGTGGCTGTGTCCGCTTACATGAACTACAGCAGCATCTGCGGCGGACGTGATCA  
GGCGTTGGACAGGTTTGCCATGAGGAGATTCTCGACGACAAGATTGGATCCCTGCAG  
GTTCCCTCGCATCGAAG

>novel\_circ\_001790

ATTCAGACGTCCTCGTCGACGACGACACCCGCGAGGACGCCAGGCGTCGGGGCGGAC  
GCGACGACGACAGGAAGCGGGAAAGGCGGTGGCCGTGTTACGGAAGTGATGGAGCTT  
TGTTACGTCACCGAAAGAATCATCGCGCTCTGGTACAGGGAGGATGCGCAGGGAGTCC  
TGGAACACGCCACCGCTCTTCTGCGTGGAAGCACGCTGATAATTATATGATATTCAAT  
CTCTCGTCGCCGGGTTCGTGCGGGGGAGCCGAACACGAGGGAAGCGGGATGGCCTCAG  
GGTCTGGCGCCAGTTTGGAAGATTGTGCGCCCTGTGCAAGGAGCTGGACTCCTGGC  
TGAACGGGGCTCCGAATCGCGTGGTCGTCCTCCACGCCAG

>novel\_circ\_001792

GCCAATCCATGCCAGCATCCGATCGTGATCCTGAGGGACGTCGCCTCGTCGGACATGG  
AGTCGTTGCTGCGCTTCATGTACCACGGAGAGGTGCACGTAGGTCAGGAACAGCTCGC  
CGCGTTCCTAAAGACGGCGCAGATGCTTCAGGTTTCGAGGGTTGGCCGACGTGAACAG  
CGGCGCTGCCAAAATTCTCCTCCCTCGTCCTCCGGCGGGAACAATGGCAGTGCGCCG  
GCGACACCGCGCAATCCTTGGAAGACAACGGCAGAGGAGAGTTGAACGAGAGCGG  
TCTGAGCCCGCCACCAGAGAAGAGACCTAGAAGCTATAGCCCACCGTTGGGTAAACCAC  
GTGGAGCCCAAGACCGACCTTCAAGAATCGCTTTTGGGCCAGGCTTTGGCGGAGGGA  
CCCACGATACACGACACCCACGAACAACGTTTCAGGCGCAATCTACCGGCGAGGAC  
TCGAATCCATGTCGGACAACGAGGAGGAGATGTCGAATAACGACAGCATCCTGAACT  
CGGTGAAGACCGAGCCAAGCGACATCCTGAATGATTCTATGGAACATCATCGTAATTCG  
TTTCCGGCGCTCTTGGAATACCAGGACTGATACCAGGACCGTCCGGGATCCACGCGG  
CGAATCAGGATCCGAATTACG

>novel\_circ\_001793

AAGAGGAGAGATCGAGGCGGGTAAATAGGCGAAGTGGGGTGACGAGCAAAAGGGGC  
GATCGGAGCAAAAGGGACGATCGAGAAGGTGGAGGAGGAGGAGGAGGAGGTGGAGA  
TAAGGGCATGATAAGCAAGGACGTTGGACGAATATCAGGTGACACGGTAGACGATAGC  
CAAGAAGGGTTGAGCGGAGGAGGGAGGAAGGTGTATCGACAGATTCGCCGTCTTGTC  
ACGCGGCAACGGATGTCGGAATGACGCGTCGATCAAGCCGTGGCTGGGCAGAGGGTG  
CAAGGACTTCGTAAACGGAAGAAAGTGATAGTCGTGGACTCGCTTCGCGGGAGGCG  
GAGAGGCGGAGTTCGTTTGGTGAAGGGAGTGGAAGAGGAAGGAAGCGTCGGGGATC  
GTCCAACTTGTCAGGTAACGAGATAAGAAGCGATCGCGGCCTCATTGTCTCATCTCACT  
CTCCAGCAACGGCGACGGATAAACGTCCTCTCGTCGCTATCACGATGTTGTCGTTATGA  
GATTCGTCGATTTTCTTATACCTGACAGTCAACAATACTGTTGATTGCTTCTTCCCCG  
AGGGGGAAGGTGAGTAAAATAGAAGGGATCTCGAGCGGACCAAGCAAAAAGAAGAA  
GAAAAGAAAAAGAAAAAATCATTATCGTATAATAAGAGATCGTACAACTGGAAGAA  
GAAACGAGACTACTACCAAAGAATTTTGATTTCGAGGGAAGAGGGTCAAAGTTAACTG  
GCCGAGAGCACACAGTAGCAAAGGAAACAGCGATCTCGTTTAACTTGGAGAGAAGA  
GAGAGAGAGAGAGAGAGAGCATCGTAAATCGCAGAACATCGTAATCGCGCAAGGACA  
GGCAACCGACTGTCCGCGTGGCTGTTGCGTTGGAAGGGTGCCGATAAAAGAATAGAG  
GGGTGCGTGGTGAACGCGACGAGAGGGTGAAGTGAAGGTGTCCTCGTGGGGTGCC  
AGAGTGAGCACGATAGCACCTCTGGTGCCCTCGGCCGTGGGTCCCGAGGGGACGGAC  
GCCATGGCGGCCTCTTCGTCCTCGTCGAGCGGCGAGCAACAGTACTCACTCAGGTGGA  
ACGACTTCCACTCGAGCATCCTCAGCTCATTTTCGTCATCTCAGGGACGAGGAGGATTTC  
GTGGACGTGACCCTGGCATGCGACAGTAGCAGCTTCACCGCGCACAAGGTCGTTCTCT  
CTGCGTGCAGCCCTTACTTCCGCCGCCTCCTCAAGGCCAATCCATGCCAGCATCCGATC  
GTGATCCTGAGGGACGTCGCCTCGTCGGACATGGAGTCGTTGCTGCGCTTCATGTACC  
ACGGAGAGGTGCACGTAGGTCAGGAACAGCTCGCCGCGTTCCTAAAGACGGCGCAGA  
TGCTTCAGGTTTCGAGGGTTGGCCGACGTGAACAGCGGCGCTGCCAAAATTCCTCCTCC  
CTCGTCCTCCGGCGGGAACAATGGCAGTGCGCCGGCGACACCGCGCAATCCTTGGA  
AGACAACGGCAGAGGAGAGTTGAACGAGAGCGGTCTGAGCCCGCCACCAGAGAAGA  
GACCTAGAAGCTATAGCCCACCGTTGGGTAAACACGTGGAGCCCAAGACCGACCTTCA  
AGAATCGCTTTTGGGCCAGGCTTTGGCGGAGGGACCCACGATACACACGACACCCAC  
GAACAACGTTTCAGGCGCAATCTACCGGCGAGGACTCGAACTCCATGTCGGACAACGA  
GGAGGAGATGTCGAATAACGACAGCATCCTGAACTCGGTGAAGACCGAGCCAAGCGA  
CATCCTGAATGATTCTATGGAACATCATCGTAATTTCGTTTCCGGCGCTCTTGGGAATACC  
AG

>novel\_circ\_001794

AGGAGAGATCGAGGCGGGTAAATAGGCGAAGTGGGGTGACGAGCAAAAGGGGCGAT  
CGGAGCAAAAGGGACGATCGAGAAGGTGGAGGAGGAGGAGGAGGAGGTGGAGATAA  
GGGCATGATAAGCAAGGACGTTGGACGAATATCAGGTGACACGGTAGACGATAGCCAA  
GAAGGGTTGAGCGGAGGAGGGAGGAAGGTGTATCGACAGATTCGCCGTCTTGTCACG  
CGGCAACGGATGTCGGAATGACGCGTCGATCAAGCCGTGGCTGGGCAGAGGGTGCAA  
GGACTTCGTAAACGGAAGAAAGTGATAGTCGTGGACTCGCTTCGCGGGAGGCGGAG  
AGGCGGAGTTCGTTTGGTGAAGGGAGTGGAAGAGGAAGGAAGCGTCGGGGATCGTC  
CAACTTGTCAGGTAACGAGATAAGAAGCGATCGCGGCCTCATTGTCTCATCTCACTCTC

CAGCAACGGCGACGGATAAACGTCCTCTCGTCGCTATCACGATGTTGTCGTTATGAGAT  
TCGTCGTATTTTCCTTATACCTGACAGTCAACAATACTGTTTCGATTGCTTCTTCCCCGAGG  
GGGAAGGTGAGTAAAATAGAAGGGATCTCGAGCGGACCAAGCAAAAAGAAGAAGAA  
AAGAAAAAGAAAAAAATCATTTATCGTATAATAAGAGATCGTACAACCTGGAAGAAGAA  
ACGAGACTACTACCAAAGAATTTTGATTTCGAGGGAAGAGGGTCAAAGTTAACTGGCCG  
AGAGCACACAGTAGCAAAGGAAACAGCGATCTCGTTTAACTTGGAGAGAAGAGAGA  
GAGAGAGAGAGAGAGCATCGTAAATCGCAGAACATCGTAATCGCGCAAGGACAGGCA  
ACCGACTGTCCGCGTGGCTGTTGCGTTGGAAGGGTGCCGATAAAAGAATAGAGGGGT  
GCGTGGTGAAACGCGACGAGAGGGTGAAGTGAAGGTGTCCTCGTGGGGTGCCAGAG  
TGAGCACGATAGCACCTCTGGTGCCCTCGGCCGTGGGTCCCGAGGGGACGGACGCCAT  
GGCGGCCTCTTCGTCCTCGTCGAGCGGCGAGCAACAGTACTCACTCAGGTGGAACGA  
CTTCCACTCGAGCATCCTCAGCTCATTTCGTTCATCTCAGGGACGAGGAGGATTTCTGTG  
ACGTGACCCTGGCATGCGACAGTAGCAGCTTCACCGCGCACAAAGGTCGTTCTCTCTGC  
GTGCAGCCCTTACTTCCGCCGCCTCCTCAAG

>novel\_circ\_001795

AAGAGGAGAGATCGAGGCGGGTAAATAGGCGAAGTGGGGTGACGAGCAAAAGGGGC  
GATCGGAGCAAAAGGGACGATCGAGAAGGTGGAGGAGGAGGAGGAGGAGGTGGAGA  
TAAGGGCATGATAAGCAAGGACGTTGGACGAATATCAGGTGACACGGTAGACGATAGC  
CAAGAAGGGTTGAGCGGAGGAGGGAGGAAGGTGTATCGACAGATTCGCCGTCTTGTC  
ACGCGGCAACGGATGTCGGAATGACGCGTCGATCAAGCCGTGGCTGGGCAGAGGGTG  
CAAGGACTTCGTAAACGGAAGAAAGTGATAGTCGTGGACTCGCTTCGCGGGAGGCG  
GAGAGGCGGAGTTTCGTTTGGTGAAGGGAGTGGAAGAGGAAGGAAGCGTCGGGGATC  
GTCCAACTTGTCAGGTAACGAGATAAGAAGCGATCGCGGCCTCATTGTCTCATCTCACT  
CTCCAGCAACGGCGACGGATAAACGTCCTCTCGTCGCTATCACGATGTTGTCGTTATGA  
GATTCGTTCGTATTTTCCTTATACCTGACAGTCAACAATACTGTTTCGATTGCTTCTTCCCCG  
AGGGGGAAGGTGAGTAAAATAGAAGGGATCTCGAGCGGACCAAGCAAAAAGAAGAA  
GAAAAGAAAAAGAAAAAAATCATTTATCGTATAATAAGAGATCGTACAACCTGGAAGAA  
GAAACGAGACTACTACCAAAGAATTTTGATTTCGAGGGAAGAGGGTCAAAGTTAACTG  
GCCGAGAGCACACAGTAGCAAAGGAAACAGCGATCTCGTTTAACTTGGAGAGAAGA  
GAGAGAGAGAGAGAGAGAGCATCGTAAATCGCAGAACATCGTAATCGCGCAAGGACA  
GGCAACCGACTGTCCGCGTGGCTGTTGCGTTGGAAGGGTGCCGATAAAAGAATAGAG  
GGGTGCGTGGTGAAACGCGACGAGAGGGTGAAGTGAAGGTGTCCTCGTGGGGTGCC  
AGAGTGAGCACGATAGCACCTCTGGTGCCCTCGGCCGTGGGTCCCGAGGGGACGGAC  
GCCATGGCGGCCTCTTCGTCCTCGTCGAGCGGCGAGCAACAGTACTCACTCAGGTGGA  
ACGACTTCCACTCGAGCATCCTCAGCTCATTTCGTTCATCTCAGGGACGAGGAGGATTC  
GTGGACGTGACCCTGGCATGCGACAGTAGCAGCTTCACCGCGCACAAAGGTCGTTCTCT  
CTGCGTGCAGCCCTTACTTCCGCCGCCTCCTCAAG

>novel\_circ\_001796

GTATCTGTACACATGCGGTGAAAAAGTGACCGGAGCTGGCCAAGCCTGCCAAGCCAT  
GGGCAATCTTTATCACACAAATTGCTTTATATGCTGTTTCGTGTGGAAGAGCGTTACGCG  
GCAAAGCGTTCTATAATGTTACGGAAGGGTATACTGTGAGGAAGATTATCTGTATTCT  
GGCTTCCAACAAACCGCCGAGAAATGCGCAATCTGCGGTACCTCATCATGGAAATGA

TATTGCAAGCAATGGGGAAGTCTTATCATCCAGGATGCTTTAGATGTTGCGTTTGCAAC  
GAATGTCTTGACGGTGTTCCTTCACCGTGGATGTGGACAATAAAATTTATTGTGTAAA  
CGATTACCACAGAATGTTTGCGCCGAAATGTGCCTCCTGTGGTAAAGGAATCACTCCA  
GTCGAA

>novel\_circ\_001797

TGCCATTATTCGGTGAAATCGTGCGCCGCTGTCTGCGGATTGGGGACGGACAACCTGCG  
TGATGGTTCCTAGCGACGATCGAGGCCGGATGATTCCTTCGAAACTGGAAGATTTAATT  
CTTGAACGCAAGGCCAAAGGACACATCCCCTTCTTCGTGAACGCTACCGCAGGAACG  
ACCGTCATTGGAGCGTTTCGATCCTATTCCAGAAATCGCTGATATATGCCAGAGACACAA  
GCTCTGGCTGCACATCGACGCGGCTTGGGGTGGTGGACTGCTTCTCTCGAGGAAATAC  
AGGCATCCTCGAATGACAGGCATCGAACGAGCCGATTCCGTGACCTGGAACCCGCACA  
AACTCATGGGGGCGTTGCTTCAATGTTTCGACGATTCACCTCAAGGAGGACGGTTTGCT  
GATTAGCTGCAATCAAATGTCAGCCGAGTATTTGTTTCATGACAGACAAACTGTACGACG  
TGAAGTACGATACCGGAGATAAAGTGATTCAATGCGGGCGTCATAATGACATCTTCAAA  
CTTTGGTTGCAATGGCGAGCCAAGGTACAGAAGGATTGGGAAACACATGGATCGAC  
TGATGGAACCTTTCGAGTACATGGTGAGAAGGATCAAGCAGATGCCTGACAAGTATTA  
TCTAATCCTAGAACCCGAAATGGTGAACGTCTGCTTCTGGTATTTGCCAACACGCGTTA  
GGAACATGCCGCACACTCAGGAGAGAATCAAAATCTTGGCAGATATCTGTCCAATCTT  
GAAAGGCCGAATGATGCAAGCCGGCACACTGATGGTAGGTTACCAGCCGGACGATCG  
ACGACCCAATTTCTTCAGAAATATCATCTCGAGTGCCGCGGTCACGGAAGCGGACGTC  
GATTTTCTGCTGGCGGAAATGGACCGGTTAGGCCACGATCT

>novel\_circ\_001798

ACCTCTCGCCATTGGGTGACAAGGGTGGCAGCCTGGTCGACGAGCTTGGAGGTGGTG  
GCGGCGGTTCCCTTGAGGAACGGTAAAGGGAAGAAGATGAGGAAACCACGGACGATTT  
ACAGCAGCCTTCAGTTGCAACAGCTCAACAGGCGGTTCCAGAGAACGCAATACCTCG  
CGTTACCGGAAAGAGCGGAGCTTGCGGCGAGTCTTGGATTAACGCAAACGCAG

>novel\_circ\_001799

GTGAGACCGTGGTGAAACGACACACGTGCTCCAGGGATGCGGGAAATCGCCGCCCA  
TTAGAGTTCCATCCCGTGAGGCGAGCGTTGCCGAGCGGAGCGTGAAACGAAGCGTATC  
CACCTCCCTTACCGGAAAACCGTGAGAGGATGCGATTCACGGGAAAGCTCGAGGGAT  
AATAAAATATCGGAATCCTTCCTTAAACCATTTTCTTAAAACCCCCCGACCGCTATGAA  
GGAGGGAAGGGTAAAATTCTATCGAGGAATCGTCGAATAAATATGAGGAAGGTGAAGA  
TTCTCGGGTTATCACGAACCCCTCTCATCGCCGAGAAAAAGAGCACGGACAGTTGGAC  
AGGCACGAAGTACCTTTCATTACCGCGTCTCCTCGATCGTCTTAATCCCGGTTGCTCGA  
TCAATGCGCACCAAGTTGAAACTGAGGGAAGGGTGTGTTAAGCCGTTGGAATTGGAC  
GTCGAGGTAACGATAACCGATCGAACGAGATAGTATCGTGCCTCTTTCGCGCCCCGCC  
GTGTACCGTTTCGAGCCGTGAGAATAACCGTTTCGAGTCGATCGACTCGAACGAGGTG  
AATTTTTGTTGTTGGAAAGTGCGTCGAGGAAAGTGTGTGTGCAACAGCAGTAAGTAGC  
AAGTGTGAAAAGACAAAAGCTACACGGTTCGTTTCGCTTTCGTTTGGATTATCTCATCTT  
TCGGTTCGGTCTGTCTTGACCGATTTCCATCCCCGTTCCACGATGCCGTTCCCTCCATCGT  
AAAAAAATATAACGGCTTATGGGGGACGACGGAGGGACGAAGAGTGAGAGGGAAGC

GGGCCGCGATATATCTGCACACCATTTGGACCGGTATAATCTCGTAAAAGCTGCACACAAG  
TGTCCATCTACGTGAGCCCGTACGTAAAGCCGTCGACGAGGATCACGAGGTCTCTAAC  
CAGGAAACGTGGTACGCCGCCACTTTTCGACCACGCTTCGTTCCAACGTGATTCCACG  
TGACAGAGGAACGTTTCTCTGAGGAAACGATCCCTCGAAGAATATACTCGGTACGGA  
CGGTGTTGAACCGTTGGGTGATCTCGTAAACCCTATCCTGAACCCTCACCGTCGAGACT  
ATATTTTTGGATGGATCTTATAATATATACGAAGTGACAGTAAGTTCTCTGTGATGCTTCG  
CTTCGTGAAAGCTTCTGGCTGTTTCGAGCAATTTTATCGTATTTTATACGTAAAAA  
AAAAAAGAAAAAGAAAAAGAAGAAACGAATTAGAGGTATATAATATTTTATAATAACT  
AGATTTAAAAAAGATAGATTCAATTTTGTTTTTAATTTTGTAAGGAACGAGAG  
TTTGTAAGATTGTAGAAATTTTACACGAGCGATCGTAAAGTGATTTTTTTAATATATATA  
TATAATATTCGTCTGATATTGAATAGAAAGAAGATTGTAGTTTTTGGTAATTAATTGGTAA  
TGCGCGAGTGCCACGTTACGTTATCTGAATCACGGAAGGATGGATCAAGTGCACGTG  
AAATCGTCGAGATCGACGTCGAGGAGCAACCCGGCGAAAATGGCGTGCGAGAAGGCG  
AGCAAGAGGCTCAGGACGATTCTGGTTAAGGCGTCGCGCCTCGGCGTCTCGACGACG  
GAAGTTGCCAAGTTGGCCAGCGCCAAGAAGCTCATTCCGCAGAGAGATCACGGATGG  
AAGTTGGCGGTGTTCTCCTGGTCATGTTGGCGGCGGAGTGATCGTCGCTTGGCCT  
GCACGGCGAGGAAAGGCTGCTCGAAGCTGGAGGAGATC

ATACCATATCAATGATAAGTAAGAAGGTGGAGAAGCACTGGGGCGCCAGATGGGGCA  
ATATCACGGTGTGGGCGAGTCTCATTATCGGACAACCACTTTGCATAATGATGTATTACC  
ACGATTACGTGATAACTCACTTCGGCGGAGAACTTGATCGAGGATTACTCCGTGGTGTAG  
GTGCAGAGGAATCGAACTCGAGGCGGACGATCACGCAGGGGTCTGGAAGAAGGAGAT  
TCTCCGGGCAAACCTCGCCACTCTTCCATCAATTTTCTCCTTTTTCTATTTTCTATTTCCGT  
CATCTTTACTCGTGTATACTAACCTATTTTTCAACCGACGTTTACGCGAATTCTTCCACTT  
TTTTTTTTCTTTTCTTTTCTTATTCTCATTCCAATGGATGGATGAGAGTCGGTCACGTGTTT  
GTTATCGCGAGCATTAAATTCCTTAAGTATTACGCATTGGCTTTATCCATTTTTTCTCTTC  
CAGTAGGAATTATATATAGATTTTTTTTTTTCGAAAGAATCGAAATTTTCGAGATACAAAT  
GCGCGTTTATTTCATCGGTGTGTATAGGATAATCAGGTAATTTGTAAAACTTCTGTAAAT  
TTAATAACCGGTAACCTCGAGGGCTAATTCTGGTAAATGTACAGCGTGTATTTGAACGTTTT  
CTCCTAATGTATTTTACTCGTGTTTAAATGGAAGGAATTGTCGTGAAACGTACTAACATA  
AATAAGTTCGCGCAGAAATTGAATTAATAATTGAATAAATCCACTAACGTGATACATCGA  
TGGAGGAGATCGTATATTTCTGGCACGTAAATCCAGAATAAGCTCTGCGTGCATCATAA  
AATTTTACAAATAATTCTCTCTCTCGTAACTCTTTCTCACTCTCTCTCGAGAAGTTGCAG  
ATGTAATTCCTACTGGATCGTATCGTGAACGTCAGTGCTCGATATTCGATCGAATTTTCT  
TGAACAAAAAAAAAAAAAAAAAGAAAAAAAAAGAAAAAAAAAGAAAAAAAAAGAAAGATTTTGCAC  
GAGGCGGTTAACAAGCTCGATCGAAAACTCAATCGCTAGATTGCGGATATTTATGCAA  
TTATTAAATTCCAGATATGGAATGAAACGGAAATATGCTTCGCTTAAAAAATATGTATT  
TTCGATATTTTGTACATTTTTTCACAACTTTTTTAAACAAATGCATAAACTTTTCGCAGTCTAC  
ATCCTATCGTACGTATATATATATATATATATATATATATATATCACTCGTTCTTTTCCCTCGT  
ATACGCGTGGGTGGTGGTGGTGATGTTTGTTGATGAATTGTTGCTATTGTAAGCCGTTG  
AAATATTCACCCATTCGGTCATTTTTATGCACGTTTTTAACCGATAAAGAATTGTTAATCA  
CTTTGATATCAGCGTTTTACATAGATTTCTCGTTGAACGAACGCTCGATCATTCCCGTCC  
ATCCACGAAGATCGCCGATCCTTTTATACGAACCGTCGAAACAATGAGATTGTCACGCAT

CGAGGGGAGGAGGGGGGCATTTTACTCTGTCATTAGCACTTATATGTATATTTAATCGAA  
ACGATTTTTTACATATGATCACGAGCGCAAAACCCTTGGCATCCCTCCTCCACTTTTACG  
AGCAGCGCGTGCCTCGTAAGCGCGGAACGCAGGTAGAGATATTATGCGTGCGTCGAGA  
CAATAATTCACTACATACTTTTTATTTTTTTTATTTTTTTTCCCCCTATCTGACGATGCTTT  
ATAGCAGGGGGACCTCGAGCGCATCGAGGGAATATTAGCCGTAATAAATTTATCCATGG  
CGCGGAGTGCAGTTGCATTTACAGGGTAAATATTTACCGGAATCGTTGCGTATCACTG  
CGAAGAAACAGTTGGCGAGGATTTAACGGGTACAAGTTGGTGCCAGTTGTGTACGAG  
GAGCAGACGATTTTGTAATAATTCGTCCAACGCTCGCGTGCCGCGCGAGCGTCATTCGT  
TGTCGAAATAAACGAAATCTTTGTTACAAGATCTCCTCCCCCGTTTAATTCCAGTCCCG  
TTCCTTCGAACGATCGTCGGAGATGATGCACCAGGTATCGGTAAATATCTTCTTCTTCG  
ATGTTTCAGGTTTCGTAATTTTTTTTTTTTTTTTTTGGCGAAATCGATTGACAATCGATAAC  
ACGTTGAAATTAACAATGAATTATTGCAGGATTTTTTTTTTATCGATGCTGCAGGTGGAGA  
GATGGAATTTTTTTTTTAATTCGACAAACGAATAGTATCGTGTTCTTTTTTTTTTTTTTT  
TGAAATTTCTCGACGCAATAACGTTTCGTAATTTTTTAATTAAAACGCAATTTGTATGTTG  
AAAATGATATATTTGTATATTGATTATCAAGTGAATGTTAAATTACAACCAATTACAAAAA  
TGAAACATATAATAGGAATAAAAATCTCGCGAATTTTACGAGCGTTTGTGTCGAATAAA  
ATTTCCGTCTAGTTCTTGCAAGTCGAAATCGAATCGAATAAAAGAAAAAAGAAAAA  
GATAAAACCTCATCTCCACAAAAGAAAAGAGGAAGGACCAAAGACACGATACGTGAT  
CTTTATCGTGATGCAAAATACCTACCCATTGGCAAAATAACTTCCTCCTTACCACCCT  
GATAATAAGAAACAAGTCATGGAGGGTTTACTGGAACACTCGACATCTTTTGACGGTC  
GGCTCATCTTTTTTGAAATTCCTCTCAACGCTGGAAACGATATAATCGGAGGAATTGCC  
TGAACGAAACGTACGAAACGATCATTCTCTCCGAAATGCGAGAACAAGAGAGGGACG  
AAGAGGGTGGAAGAAAAAAGAAGAGTTTCCAAGGTCCAAAAGATGCTCGTCGAAGA  
AGAATGTTTTCTTTTTTTTTTCTCCTCCTTCTTTTCTCTTTTCTCGAGCCATCATCCCTTG  
GGGTTTGTGGGTGTCTGATGAGCCTGGATGTGACCCGTTTGCCCTGGAGCAGTCTC  
GGCGATGGATAAATTAATGATGCGGGGCGCTCACCACCGACAGTTGGACATACGTCTG  
CGTCAGAGAGACGCGATGTTATATACCATCCAG

>novel\_circ\_001801

CTTCCACCGCGAAGCAAAACGGCGAGGAGGTGACGACTCGAAGCACGAAGTAGAC  
GTAGCTGGCACGGTCTTGGTGCAATATCCGGACAACCTTGACTTTCCGTGATCTTTACTA  
CTTCATCCTGGCGCCTACCCTCTGCTACGAACTGAATTTCCCTAGAACACAAAGGATTC  
GGAAAAGATTTCTGATTAAACGGATCCTGGAGGTGGTGGTTCGGCTGCCAAGTGGTCAT  
GTCGCTCTTCCAACAATGGATGGTCCCGTGTGTGAAGAATCCCTCGTACCGTTCAGC

>novel\_circ\_001802

GATATCATAGCTCATGGGCCAGGAATGGTGTTCACATCGTAAACCTCATCGTGATGGT  
ACTGATGCCGATGGTGGTCATCCACGTGAAGGATTCCGGATTCACTGTGTCGAGAATC  
CGGCCTCGATGCTGATGGAGAGAGAGAGGGAGAGAGAGGGACCATTTCATGATTCAAA  
GCGCACGCGAATCATAGCGTTGCGGGAATACGAAGTCGTCCCGCCACTAACTGGATA  
AATTTCAAGACGAGCACGATGGACACGTGCTGTACGTGTGCATGCTGTACG  
CCGTACTCTTCTCAAGCTGTGGTTCGTACGTGCAGGTGAACATGTGGTGTGCGGGTGAA  
CAATCGAAGAAAGGCAACGAGCCAGGGGAGGATGCGACGACAATCTCTGTCTACAA  
TAATCTACAGTCTTCCACCGCGAAGCAAAACGGCGAGGAGGTGACGACTCGAAGCA

CGAAGTAGACGTAGCTGGCACGGTCTTGGTGCAATATCCGGACAACCTTGACTTTCCGT  
GATCTTTACTACTTCATCCTGGCGCCTACCCTCTGCTACGAACTGAATTTCCCTAGAACA  
CAAAGGATTCGGAAAAGATTTCTGATTAAACGGATCCTGGAGGTGGTGGTTCGGCTGCC  
AAGTGGTCATGTCGCTCTTCCAACAATGGATGGTCCCGTGTGTGAAGAATCCCTCGTA  
CCGTTCAGC

>novel\_circ\_001804

GATATCATAGCTCATGGGCCAGGAATGGTGTTCACATCGTAAACCTCATCGTGATGGT  
ACTGATGCCGATGGTGGTCATCCACGTGAAGGATTCCGGATTCAGTCTGTTCGAGAATC  
CGGCCTCGATGCTGATGGAGAGAGAGAGGGAGAGAGAGGGACCATTTCATGATTCAAA  
GCGCACGCGAATCATAGCGTTGCGGGAATACGAAGTCGTCCCGCCACTAACTGGATA  
AATTTCAAGACGAGCACGATGGACACGTCGGTGCTATGTACGTGTGCATGCTGTACG  
CCGTACTCTTCCTCAAGCTGTGGTCGTACGTGCAGGTGAACATGTGGTGTCTGGGTGAA  
CAATCGAAGAAAGGCAACGAGCCAGGGGAGGATGCGACGACAATCTCTGTCTACAA  
TAATCTACAGT

>novel\_circ\_001805

GATATCATAGCTCATGGGCCAGGAATGGTGTTCACATCGTAAACCTCATCGTGATGGT  
ACTGATGCCGATGGTGGTCATCCACGTGAAGGATTCCGGATTCAGTCTGTTCGAGAATC  
CGGCCTCGATGCTGATGGAGAGAGAGAGGGAGAGAGAGGGACCATTTCATGATTCAAA  
GCGCACGCGAATCATAGCGTTGCGGGAATACGAAGTCGTCCCGCCACTAACTGGATA  
AATTTCAAGACGAGCACGATGGACACG

>novel\_circ\_001807

GTTCTTTTCGGGAATCAAGATCGCAGACGAATGAGGATTCGTTTGTCCAGCGAAGAAAA  
ACAAAAGATGGCCGCTTCCTGCGGTCAAGTACAGCCGCCCTCGAGCACTTTGCTAATA  
AGCGTTCGCCGAAAGCGACGCGGGCCGAGGCCAAGGATCGTGTTACATCTCCGTTGA  
AATGTTCAAGAGTGGCACTCTCGCCTTTTTAAACAACCTTGTTTCTTCTCTCTGCGTT  
TCCACGAGATTCCCTCGGGCTGCACGTGTCATGCGTTTCCCTCTTGAGCCTAATTTCCC  
TCGTACAAGTGCACCAAATAAATCCTCGCCTGTCAATCCTTGAAAATTAATCTTCCAAA  
GAAAAAAGAGAAAAATCTTTCTTCTCCTTAAATCTTTTTTCTCCTTTAATTACATCG  
AGATTGAGATTTAATTTTACTTAACGAAAGACTAATTATTTCTTCAAGAATTGTCTTTTC  
TTTTCTTTTCTTTTCTTTCTTTCTTTTAAAGATACTGAGAGAATATAACAGATGTCCTT  
TTATCAAGAAGGTGCATCTAGCAGTACGTTTAGCAATCTTTCGAGATTGTCGAAGAAAG  
ACACGTGCAATGAAAAAATGAAGATCAGCGGAACAGAAGAAGAACAAAGTGATCGA  
AGCGAAGGCGATTGGACGGAACGAGAAGGATCGTTTCATATGTCTGCATCCGGTTGGT  
CATTTCCGGCACGCGCTGAGACACGTGGCTTGCCCCCTTGCGCGCTCTAGCCCCCTTCTCC  
ACGCAGGGGGGAGTACATATTTTTCTTTTAAAGGGCCACCGAAATTAGGACCCATCTAG  
GCCAAGGGTCCGTCTCTAAACATGGAGCAATAGGAAGTATCTTTCGTGCTTGTTCGGATG  
GGTGCTTCAAATGTAAACGCCTCTCAAACCTTTCCTCTTGATAATTGCCCCGCGCATTGT  
ACCCCCCTTCTCTTAAACAATTGAGGAGAACAGTAATTAACCGTAAAAGAAACGAATTA  
AAAAGAGGCTTTTATTTATACCAGGATCAATTTATTATCAAACGATTATTTTTGGGAAA  
GAATAATGTATATATATATATATTGAATAAAAAATAATCGTATGAAATGGTTACAACGGCGA  
GGAGTTAATAATAATTTAAAGTTAAAAGAGTTAAATTAATAATAATAAAAGAAAAGGGC



GAGGAAATAACGAGCACAGCTGATTTTAAAGTCCTGGCAAACACTATTGTAGGAGCGC  
AGGACTTTAAAAGTTCTTTCCTTCACCGGAGAACCTGGTCCTTTTTCTCTACACTTGTG  
CGCCATTTACGCAAGCCAGTACGCACTTGCCGCGCTCCGTTCTTGGACGGCGCGCGTA  
GCATGAATGGTCCACGGCCTTGAATAGAGAGGAATTCACAAAGAAGCGGGCAAAAGG  
ACCGACAAAGAAAGCCCGGGACTTCTTTTGTGAGAGGGTCTAGCAGTCGAGGTGACA  
CACAGGTACGGATTTCGGATCCCGAGGAGGCGAACGGCGCAGCCTCCGCTAACCTACGT  
GGATCGATCTCCAGTCTCCTTCAACCTGCGGAATGCGTCCCTGATCCGTCGTTTCTCCT  
CTTCATGGACGCGAGCACAAAGAAAAAGAGGACGAGGACGAAGAAGAAGAAGAAGA  
AGAAGAAGAAGACGAAGAAGAAGAAGTGTGTGGACAG

>novel\_circ\_001808

AGGCAGCCGCCAGCCACCGGAGCGGACTGACTGACAGGTTTAATTCTCAAGGTAGCTA  
GAGCGAGTAATCCGCGCCGGGCTGCAAAGTATTAATAACAAAATTTACGATGTTGCTCG  
AGATGCATGGCGGCCGACAATGGAGTCGCACGAGATACAAAATGCAGCACAATGTTTC  
CGTCCGTTGGTCTCATATTCGGTGGAACGGGTCTGTAGCACGAGGTTGAAATAG

>novel\_circ\_001810

TTTTCAACGTCGTTCAAATTAGATTAGCACCTATCATCAACTGCAGATCGTGCTCCAAT  
ATTTTGTTCGAAGGGATGTATAATTAGTAAGTGGAATAGCAATATTCACAGTTGCATGA  
CCGAGCAATATCATAAATGAAAGAATAAATTTCTTCATGATTAGTGATTTTATTTGGTG  
AATACTCTAA

>novel\_circ\_001812

GCAATTATCCACGGTTTTTTGCGGCCACGTCTAGACGATGCCTCGTTCGTGTCCGCGTAG  
CGACGAAGAAACGAAATGGCAGGTAACGAGGCGCCTGACATCCGTCTGAAGAACTGGC  
GACCGACGATAACGGTGCTCCAGAAACGATAACCAAGTTCGAGCCGTCTGGTTCGGCGA  
CCAATAAGGATCATTGACTCCCTGTTATCGCGCCGCAATCCCAGATGTCTAATACCCGG  
CGAGAGAGTATTTTTCGCAAATATTTTGACCAAACCGAGGACCGAGAATGGGCAAGAT  
ATCGAAGATTTCTACCATGTTATTTCTTGGAATAA

>novel\_circ\_001813

GCAATTATCCACGGTTTTTTGCGGCCACGTCTAGACGATGCCTCGTTCGTGTCCGCGTAG  
CGACGAAGAAACGAAATGGCAGGTAACGAGGCGCCTGACATCCGTCTGAAGAACTGGC  
GACCGACGATAACGGTGCTCCAGAAACGATAACCAAGTTCGAGCCGTCTGGTTCGGCGA  
CCAATAAGGATCATTGACTCCCTGTTATCGCGCCGCAATCCCAGATGTCTAATACCCGG  
CGAGAGAGTATTTTTCGCAAATATTTTGACCAAACCGAGGACCGAGAATGGGCAAGAT  
ATCGAAGATTTCTACCATGTTATTTCTTGGAATAAAGGAGGCTGTCCTCGCGTTCCGC  
ATCTTTCGCGAGGCTTTAATGACCACCACGTGGTGCTATCATCGGAGGTAGTACGTGAG  
AAACACGGACGAGTATCATCACGCGGTGACTCGCTAAAATTATCCGTGCTTCTTTTCG  
AGGCAACACCGTAGGATGAGAATTAAGCCGGCGCAAAAAACCAAGGCGACCGTGAAG  
ACCAGCGACGGTCTCTTCGGTTTCTCAAAGGACTTCTCCTGGGAAG

>novel\_circ\_001814

AGCCACCGAGGCGTGAGTGTCTACGCGAGTAACAGTTTTCCGACTCGGTTCCCTAAAAC

TTTCACGGTTATTCGCCCCGGGCCCCGACAACTTCGTGAGAGATTGTCTTCTCGTATATAG  
AGAACGAAAGCTGATGAATAGCGAACGGAAGTCGATCGTCTCGTCGGATCGGAAGCT  
GTGAACCTAGAACGTTCCCACGATTCTCACCAAGGATATACCGTATAATAATTAGTGCG  
AGAAGACAATAAATTTCCATTTCGAACAAAAATCGATCGATCAGTGTGTGATCTTCGATG  
AAACCAGAGCTTG

>novel\_circ\_001815

AGCCACCGAGGCGTGAGTGTCTACGCGAGTAACAGTTTTTCCGACTCGGTTCTTAAAC  
TTTCACGGTTATTCGCCCCGGGCCCCGACAACTTCGTGAGAGATTGTCTTCTCGTATATAG  
AGAACGAAAGCTGATGAATAGCGAACGGAAGTCGATCGTCTCGTCGGATCGGAAGCT  
GTGAACCTAGAACGTTCCCACGATTCTCACCAAGGATATACCGTATAATAATTAGTGCG  
AGAAGACAATAAATTTCCATTTCGAACAAAAATCGATCGATCAGTGTGTGATCTTCGATG  
AAACCAGAGCTTGGTGAAACGATGCGGTGATACCCGAGGAGCCCCGCTTCAACACCC  
GTACATATCAATTCATATCTCTGCCCCGATAAACATCGCCAAACATCAATCGACCAATCAA  
ACGAAGCATATCGAAACGCAATGAAGACCCAACGATGATCGAATCGCGGCCAAGGCAT  
ATCAGGCGTCGATCAAGCGTGATCGGCCAGACTGTTCAACCCACTCTATCCTAACCAG  
AGACCTGTCCATAAACCTTGCACCACCCCCCGGTCGACGACACCAATTGAATCAACCT  
TGGTCCAACCGCCTCTCCCTCCCCCTCCCCCTCCTCCCCTCCACCACGTCCCATATCA  
CCACGCCCAATCGGAAATCAACGGAGAGAAGCAAATAGAAGGAAGGATGTTGCTGAG  
GTAACGCGGCCTCTCGAGCCGGGGTTAAGAATCGATCGTTAAATCGAAACCGTGCTCG  
AACAACGAAGGGGATACCAGGTGGCGGATTGCATAGTGGATTTCGCGTAGGGGAGAGA  
GATCCAGAGTGAAGGATGGGTTTCCCCAGGAGGAGATCCCTGTGGTTGAAGGTGGCCA  
TCCTGGCCACCGCGGTTTGGGCGACCGTGTGCTTCCTCTTGTACACGGAGGACCGTGC  
CAACGCGGCTGTTCAAGGGTTGGCGCCGTCAGGCGTCGCGGCCCCCCTAAATGGCCAA  
CGTTTTCTGTGCCCCGACCCGCGCCTCTTAGAAAGGAGACGCCGCAACCGAAGCCAAA  
GGTGATTCAACCTGGACCCGAGCAAGGTGCTGGTGTGCTTGTGCTCCCCGTGAACCA  
GATGCAAGCGCACCTGGCGAGATGGGAAGGCCAGTGATTCTGCCAACGAATTTGACTG  
CCGAAACTAAAAAACTTGTTGACGATGGATGGCTAAACAACGCGTTCAATCAGTACGT  
TAGCGATCTGATTTCTGTTCATAGAACTGCCCCGACCCTCGTGATCCATG

>novel\_circ\_001816

GTGAAACGATGCGGTGATACCCGAGGAGCCCCGCTTCAACACCCGTACATATCAATTCA  
TATCTCTGCCCCGATAAACATCGCCAAACATCAATCGACCAATCAAACGAAGCATATCGA  
AACGCAATGAAGACCCAACGATGATCGAATCGCGGCCAAGGCATATCAGGCGTCGATC  
AAGCGTGATCGGCCAGACTGTTCAACCCACTCTATCCTAACCAGAGACCTGTCCATAA  
ACCTTGCACCACCCCCCGGTCGACGACACCAATTGAATCAACCTTGGTCCAACCGCCT  
CTCCCTCCCCCTCCCCCTCCTCCCCTCCACCACGTCCCATATCACCACGCCCAATCGG  
AAATCAACGGAGAGAAGCAAATAGAAGGAAGGATGTTGCTGAGGTAACGCGGCCTCT  
CGAGCCGGGGTTAAGAATCGATCGTTAAATCGAAACCGTGCTCGAACAACGAAGGGG  
ATACCAGGTGGCGGATTGCATAGTGGATTTCGCGTAGGGGAGAGAGATCCAGAGTGAAG  
GATGGGTTTCCCCAGGAGGAGATCCCTGTGGTTGAAGGTGGCCATCCTGGCCACCGCG  
GTTTGGGCGACCGTGTGCTTCCTCTTGTACACGGAGGACCGTGCCAACGCGGCTGTTT  
AAGGGTTGGCGCCGTCAGGCGTCGCGGCCCCCCTAAATGGCCAACGGTTTTCTGTGCCCC  
CAGCCGCGCCTCTTAGAAAGGAGACGCCGCAACCGAAGCCAAAGGTGATTCAACCTG

GACCCGAGCAAG

>novel\_circ\_001817

GTAAAAACAGAACGGCTCACGCCAGACAATAATTCAACGTCGTCGAGGAGCGTGACG  
CCCTCATCGTCCAGCCATCCAGGAACGCCACCAAATGCTACCCCTTTGGGTGGACCCG  
AGGGCCCACCACCACCCCATCACCTCAAACACATGGAGCAGATGATGGGTTCGGAATTA  
TAGCGATTTTCATGAGAAGTCTCGCTGCCAAGTACAATAACGCCAATCCTAATGACTACT  
TCAGTTCGCCCAGAAACGGCTATCCTCCAGGCCTAGATCCAAGGTTTCCGGCATTCAA  
AACTGCCGCCACACCCTTCGTCGGTTTGATGGCGCCGTTGGGTGCGCCACAACCGTCA  
ACCGTGTCCACCACCTCCCCTCTATCTAATAAAGATCCAAAAGAGCAGAAGCAGGACA  
GTCTGTTTCGGTAATCCCGTGTTCACCGATGCTGGACATGTCGTCGACGCAAGCACTT  
TTGCATATGGTGAGGACTGCGAATGCTGCACAAAATGCTGCAGAATTGGAAACGTATC  
TCAAAGGTGCGAACAAAAGAGACACGGGAGTGACGAGTCCTTTGGATCTGTGAGTC  
CAGGTGGATTTCGACCCCCGGAAGAGGCAGAGGGCGGAAACGAGGAGATCGGGAAGC  
GTGTCTCCGAAACCGAAGCCAACCTCCTCGACCGACCACACCACCTCCAGTCAGATGCC  
CATCCCTGTGTGGCCACATGCCATGTGGCGATGGGCAAGCTGTCAATCGATGGACCATC  
GAGGACGTCGTCAATTACGTGTCGTCGATCGATATTTGCGCAGAGTATGCACAG

>novel\_circ\_001818

GTGAGGTATCAGGTGAGAACGTGTCCGCGGGTTCTGGACCACGTAGCGGGCGATCGTG  
AGAGGGGACTGATTTAGGTACACACACGGAAAATAACGACGGGGCCACCCTGGCCGC  
GAACACAGCGGTGACGCGAGGGGCGGAAGCCCCCAGGGTGCCACCTTTCCGGTGC  
GGCCACCCCCAGACCGCTAAGGGGTAGGAGACGACAAAACCAGAATGGTCTCGACAC  
CACTCAAGTTAAAACAGAACGGCTCACGCCAGACAATAATTCAACGTCGTCGAGGAG  
CGTGACGCCCTCATCGTCCAGCCATCCAGGAACGCCACCAAATGCTACCCCTTTGGGT  
GGACCCGAGGGGCCACCACCACCCATCACCTCAAACACATGGAGCAGATGATGGGT  
CGGAATTATAGCGATTTTCATGAGAAGTCTCGCTGCCAAGTACAATAACGCCAATCCTAA  
TGACTACTTCAGTTCGCCCAGAAACGGCTATCCTCCAGGCCTAGATCCAAGGTTTCCGG  
CATTCAAACTGCCGCCACACCCTTCGTCGGTTTGATGGCGCCGTTGGGTGCGCCACA  
ACCGTCAACCGTGTCCACCACCTCCCCTCTATCTAATAAAGATCCAAAAGAGCAGAAG  
CAGGACAGTCTGTTTCGGTAATCCCGTGTTCACCGATGCTGGACATGTCGTCGACGC  
AAGCACTTTTGCATATGGTGAGGACTGCGAATGCTGCACAAAATGCTGCAGAATTGGA  
AACGTATCTCAAAGGTGCGAACAAAAGAGACACGGGAGTGACGAGTCCTTTGGATCT  
GTCGAGTCCAGGTGGATTTCGACCCCCGGAAGAGGCAGAGGGCGGAAACGAGGAGAT  
CGGGAAGCGTGTCTCCGAAACCGAAGCCAACCTCCTCGACCGACCACACCACCTCCAG  
TCAGATGCCCATCCCTGTGTGGCCACATGCCATGTGGCGATGGGCAAGCTGTCAATCGA  
TGGAACATCGAGGACGTCGTCAATTACGTGTCGTCGATCGATATTTGCGCAGAGTATGC  
ACAG

>novel\_circ\_001819

GTAAAAACAGAACGGCTCACGCCAGACAATAATTCAACGTCGTCGAGGAGCGTGACG  
CCCTCATCGTCCAGCCATCCAGGAACGCCACCAAATGCTACCCCTTTGGGTGGACCCG  
AGGGCCCACCACCACCCCATCACCTCAAACACATGGAGCAGATGATGGGTTCGGAATTA  
TAGCGATTTTCATGAGAAGTCTCGCTGCCAAGTACAATAACGCCAATCCTAATGACTACT

TCAGTTCGCCCAGAAACGGCTATCCTCCAGGCCTAGATCCAAGGTTTCCGGCATTCAA  
AACTGCCGCCACACCTTCGTGCGTTTGTATGGCGCCGTTGGGTGCGCCACAACCGTCA  
ACCGTGTCCACCACCTCCCCTCTATCTAATAAAGATCCAAAAGAGCAGAAGCAGGACA  
GTCTGTTTCGGTAATCCCGTGTTCACCGATGCTGGACATGTCGTCGACGCAAGCACTT  
TTGCATATGGTGAGGACTGCGAATGCTGCACAAAATGCTGCAGAATTGGAAACGTATC  
TCAAAG

>novel\_circ\_001820

GTGAGGTATCAGGTGAGAACGTGTCCGCGGGTTCTGGACCACGTAGCGGCGATCGTGG  
AGAGGGGACTGATTTAGGTACACACACGGAAAATAACGACGGGGCCACCCTGGCCGC  
GAACACAGCGGTGACGCGAGGGGCGGAAGCCCCCAGGGTGCCACCTTTCCGGTGC  
GGCCACCCCCAGACCGCTAAGGGGTAGGAGACGACAAAACCAGAATGGTCTCGACAC  
CACTCAAGTTAAAACAGAACGGCTCACGCCAGACAATAATTCAACGTCGTCGAGGAG  
CGTGACGCCCTCATCGTCCAGCCATCCAGGAACGCCACCAAATGCTACCCCTTTGGGT  
GGACCCGAGGGCCCACCACCACCCCATCACCTCAAACACATGGAGCAGATGATGGGT  
CGGAATTATAGCGATTTTCATGAGAAGTCTCGCTGCCAAGTACAATAACGCCAATCCTAA  
TGACTACTTCAGTTCGCCCAGAAACGGCTATCCTCCAGGCCTAGATCCAAGGTTTCCGG  
CATTCAAACTGCCGCCACACCTTCGTGCGTTTGTATGGCGCCGTTGGGTGCGCCACA  
ACCGTCAACCGTGTCCACCACCTCCCCTCTATCTAATAAAGATCCAAAAGAGCAGAAG  
CAGGACAGTCTGTTTCGGTAATCCCGTGTTCACCGATGCTGGACATGTCGTCGACGC  
AAGCACTTTTGCATATGGTGAGGACTGCGAATGCTGCACAAAATGCTGCAGAATTGGA  
AACGTATCTCAAAG

>novel\_circ\_001821

GTGAGGTATCAGGTGAGAACGTGTCCGCGGGTTCTGGACCACGTAGCGGCGATCGTGG  
AGAGGGGACTGATTTAGGTACACACACGGAAAATAACGACGGGGCCACCCTGGCCGC  
GAACACAGCGGTGACGCGAGGGGCGGAAGCCCCCAGGGTGCCACCTTTCCGGTGC  
GGCCACCCCCAGACCGCTAAGGGGTAGGAGACGACAAAACCAGAATGGTCTCGACAC  
CACTCAAGTTAAAACAGAACGGCTCACGCCAGACAATAATTCAACGTCGTCGAGGAG  
CGTGACGCCCTCATCGTCCAGCCATCCAGGAACGCCACCAAATGCTACCCCTTTGGGT  
GGACCCGAGGGCCCACCACCACCCCATCACCTCAAACACATGGAGCAGATGATGGGT  
CGGAATTATAGCGATTTTCATGAGAAGTCTCGCTGCCAAGTACAATAACGCCAATCCTAA  
TGA

>novel\_circ\_001822

TCCAGGAGAAACAAGAGTGAGGAGTAAAAAGTAAAAGTGAAGAAGAATTCGAAATTT  
GTGCACGATGTCTCGATGTTCAAAAATTGTTTCCTGTACCAAATGAAAGAGATGAATG  
ATATTCTTCTTGTGCACAGCCGACGGGTAATCTAATTCCTGGTGATAGTGATGTTACTTC  
TTATCTACGCTTAATCTAACAATCGAACCATCTTTCTATGAACACTCGACGAGAAGGAA  
CATTCGCAAAATGAATTTACGAAACTCTCGAAAATTACTTATCCATTATCGAAAAAATC  
GAATCGAACTGAACTAAACTCCCAGCCATTGAGAGTTCTACGAGATATCCTCACGATGC  
ATCTGTCTCACGATGTATCGAGCGTGAAAGAGCGTGCCAGTTCGTTTCGCACGTGCAG  
TTAACGTGTCGAGTCATATTGGTCCGGAAGCGTGCGTGCATGCGGTATGTGCGTACGA  
TTGAAGGAAACGTTGAACGTATTTCGACGACTCCGGTTCGGCGTTCGGTTGTGCTCG

TACGGCTTCGTTTGCATAGAAGTGCGTGCGTAACGTACGCCGGAGGCCACGGCGTAAG  
GTGGTGTACACGGGATTCGGATCGTCCCGCCGCTTTGTTTACGCTCGTATCGGGCCGAT  
GATCGAGCATCGTGTGTACACACCGCTTCTTATCCGCCGTTGCGTTATCCACCTTCGAA  
ATGGCGCGTGTGCGGTGACGAGAGCCTCCTCAGTCGGTTTTTCGCGCGTGCAACGCTTC  
CGATCGGACCGTCAGACGCGTGTGACGATCGTCGCCGTCGCCGTCGCCGTCGCCTCC  
TACGTTTCTCTCGATCATCCGACGGGGAAGAAGAGCTGCGCTCGCGTGCCTCTCTTT  
CCATCACGGTTCGTGTGCGTACGTGTGCTTGTGTGTGCGCGTCTCTGTGTGTATGTGTGT  
TCGTTGTGTGTCGTGCGTTCGGTGGTCGTGGCACACGTGTGCCTCGTTGTTCGGTTACGCG  
AATCCAACCTTATTGTGTGAGTTCGTGTCGTGAGAGTTTGCCGCGTGTGACCTCTCCGTG  
ACTAGGAAAATGAGACGATCCAGTGGCAACGCGTTCTGAGGATCATCGAGGAGGAAC  
GGCAACGGGCAACCAGCCTCGCATCGAACCG

>novel\_circ\_001823

ATTGAACAAACAATCGATGAGTATCGCAACGCTTTGGAGAGCAACGCTTTGGGCACAG  
GGAAATCGGCCTCTGCGTTCCTCAAGTTGGTACCTCTAGTCAGATCAGCCTCTCCAGAC  
GAGCTATTGAAAATATTAAGTCCCGATATCGTCAACTGAAACCGCAACTATTGGA  
CGTGTATGGCGTGGCCTCAACCGTGGCGAGTCATCAAGCAGCCATGAAGATTCTGAAA  
CAGGATGAAAGGGGCGACGAAACCGAAAGATATCTCTGGGCCCTGTCCTGTCCCCAA  
CTCCAGATGCAGATATCGCTAAAAACATTCTGAAACGGTCAGAAGAGACTAATCCAAA  
CGACAAAGTAGCAGAGACGTTAGCCCTAACTGCGGCAGCTATGGCACGCCATCTAGGA  
TCTCCAGCTGCCATAGAAAAAGCAAGGACTAGCTTAGAAATTGGCCTGGACAGTTGCA  
CGGGAGAAGAGTGCAAATTAAAGTTCCTTAGAGCGTTGAGAAATTTAAGAAGCAAAA  
CTGCGATCCCTAAATTGTTAAATTTGCGACAAGTGAGGAGAAGTCGCTCAGCATTGC  
TGCCTGGAAAGCTTTAGCTACTCTGCCCAAAGATTCGATCACATCCGAGGTGAAGGAA  
GCAGCCAGACGTGTTTTCTATCAAATAGGTGGACCCAAGAGGGACAGCAGCGCCAGA  
ACTCTGGCCCTGGATATCATTCTGGAACAGGCCCCGTGCAAGGAAGACGTTGGACACC  
TCGTGGAATACTTGGCAGGCACAGATCCTGCGTACGAGGTCCGCAAGTATCTCAGTCA  
ACGATTGGAACAGGTTTCTGAAAAAGATCCCCGATTAGCCAAGGATTTGAACGAAGTC  
TTAAGCACAAGTGGGAAAGATATCGTTAATTATAACGTGTTTTCCCAAAAAGGTTTAAG  
CACAGCGTTCACTAGAAGCTTCTTAAGATCGCCAGACAGCAATGGATCGCTGGTAACC  
ATTCAGGAAATCAGCTCAGGATTGATGAAACGTGGGATAGTGGACGTGATTCTCCAAG  
TGGAGGACCACGAGGAGGCGTTATTCTCCCTTGGCCTGTTTCGCGGGGGGTCTAGGAAG  
CTTCGTCTCGACGTCTGAGGAAGAAGATATCCAAGACAACGAACCTGCCACGGCAGG  
GATGGAGCTAGATTCTTGGGAGTTGGCATCAGGCCGTTTCGTTTTCTCTTGCCAAG  
GGGAGCTCATGGGCCACGTCTGGTCCGGCACAGGGTCTGAACGGACCCCAGCCTTCC  
AAGCCTTGTCCTCAATCCACTATCACAACGAATACATCCCACTGGGTTTCGGGGATCGTG  
ATTGAGATTGACGTTACGGGCGCGGTACGCTTCGATTTAGCTGGACAGATTCAACTGA  
GTCTGTGGTCCAGAAATGCCAGTCTCTGGTAGATTTGAAGGCTGGAGTGGTGATCCA  
AGGAGGGGCGAAGGTGCGATCCGACTTCGTGCAGAGCATGGCCGAATTCTCCATGACC  
ATGGAGCCCAAATTGGAGTTGGCCACCGACGTGGACTTTTCTGGACCTGTCTCTTTGT  
GCATGAAACTCAGCCAACCAGAGAACGTGGTCAAGTATCAAGTGACAAGGTCGAAA  
GGGTGGCCGGAAGTAGGCACAAGCTGAGGAAGACTAGGAGGATAAGGCTGCACAATC  
CTG

>novel\_circ\_001824

ATTGAACAAACAATCGATGAGTATCGCAACGCTTTGGAGAGCAACGCTTTGGGCACAG  
GGAAATCGGCCTCTGCGTTCCTCAAGTTGGTACCTCTAGTCAGATCAGCCTCTCCAGAC  
GAGCTATTGAAAATATTAAAAAGTCCCCGATATCGTCAACTGAAACCGCAACTATTGGA  
CGTGTATGGCGTGGCCTCAACCGTGGCGAGTCATCAAGCAGCCATGAAGATTCTGAAA  
CAGGATGAAAGGGGCGACGAAACCGAAAGATATCTCTGGGCCCTGTCCTTGTCGCCAA  
CTCCAGATGCAGATATCGCTAAAAACATTCTGAAACGGTCAGAAGAGACTAATCCAAA  
CGACAAAGTAGCAGAGACGTTAGCCCTAACTGCGGCAGCTATGGCACGCCATCTAGGA  
TCTCCAGCTGCCATAGAAAAAGCAAGGACTAGCTTAGAAATTGGCCTGGACAGTTGCA  
CGGGAGAAGAGTGCAAATTAAAGTTCCTTAGAGCGTTGAGAAATTTAAGAAGCAAAA  
CTGCGATCCCTAAATTGTTAAAATTTGCGACAAGTGAGGAGAAGTCGCTCAGCATTGC  
TGCCTGGAAAGCTTTAGCTACTCTGCCCCAAAGATTCGATCACATCCGAGGTGAAGGAA  
GCAGCCAGACGTGTTTTCTATCAAATAGGTGGACCCAAGAGGGACAGCAGCGCCAGA  
ACTCTGGCCCTGGATATCATTCTGGAAACAGGCCCCGTCGAAGGAAGACGTTGGACACC  
TCGTGGAATACTTGGCAGGCACAGATCCTGCGTACGAGGTCCGCAAGTATCTCAGTCA  
ACGATTGGAACAGGTTTCTGAAAAAGATCCCCGATTAGCCAAGGATTTGAACGAAGTC  
TTAAGCACAAGTGGGAAAGATATCGTTAATTATAACGTGTTTTCCCAAAAAGGTTTAAG  
CACAGCGTTCACTAGAAGCTTCTTAAGATCGCCAGACAGCAATGGATCGCTGGTAACC  
ATTCAGGAAATCAGCTCAGGATTGATGAAACGTGGGATAGTGGACGTGATTCTCCAAG  
TGGAGGACCACGAGGAGGCGTTATTCTCCCTTGGCCTGTTTCGCGGGGGGTCTAGGAAG  
CTTCGTCTCGACGTCTGAGGAAGAAGATATCCAAGACAACGAACCTGCCACGGCAGG  
GATGGAGCTAGATTTCTTGGGAGTTGGCATCAGGCCGTTTCGTTTTCTTCTTGCCAAG  
GGGAGCTCATGGGCCACGTCTGGTCCGGCACAGGGTCTGAACGGACCCCAGCCTTCC  
AAGCCTTGTCCTCAATCCACTATCACAACGAATACATCCCCTGGGTTTCGGGGATCGTG  
ATTGAGATTGACGTTCAAGGCGCGGTCAGCTTCGATTTAGCTGGACAGATTCAACTGA  
GTCTGTGGTCCAGAAATGCCCAGTCTCTGGTAGATTTGAAGGCTGGAGTGGTGATCCA  
AGGAGGGGGCGAAGGTGCGATCCGACTTCGTGCAGAGCATGGCCGAATTCTCCATGACC  
ATGGAGCCCCAATTGGAGTTGGCCACCGACGTGGACTTTTCTGGACCTGTCTCTTTGT  
GCATGAAACTCAGCCAACCAGAGAACGTGGTCAAGTATCAAGTGTACAAGGTCGAAA  
GGGTGGCCGGAAGTAGGCACAAGCTGAGGAAGACTAGGAGGATAAGGCTGCACAATC  
CTGGTAAATCTTATCTGTTGAACAGAAAGAATAACGAAATGTGTTCCAAGATTACTGGT  
TGAATTGAAGACTGGTTTTGTTAAAGTTTGCCACGAACTTTATAAAATATACAAAGAC  
AATTGTAAAGGATATCAAATTCTTCCTCCATGTGCAGAAAGAGAAACCATGCGTTACAT  
GTGAAACAAAGATATAAGGCGAGAGATTTTTTTATTATTGT

>novel\_circ\_001825

GGCACCGACTTGATCAAAGTGTCGAGGTTTTACAAGGATAGCAAGGAGGGAAAGTTC  
GTGAGCTTCTTGACGAGGACACGAGGACTCTGTACGACGGTTCCGTAAAGGCGCCA  
AGGAGTCTAACAACGGTCCTTGTCTTGGCTGGCGGGATGGACCAAACAAACCATATCA  
ATGGCTACATTACAACGAGACCCTGCTCAGGGCGAAGAATTTCCGCTCTGGCCTAGTG  
TCTCTGGGGCTGATGCCAGGATCGCACACGCTCATCGGTCTCTACAGTCAGAAGTCTC  
CAGAATGGATCCTCACGGAGCAGGCTTGTTACACGTAATCTTTGGTAGTAGTACCTTTA  
TACGACACATTGGGCCCTGACGCGTGCGCCTTCATCATTAATCAAGCCGAGATCAATTT  
GGTCGTGGTCGAGAACGATACCAAGTGCAATTTGCTTCTCGACAAAGCGCCAAGATGC

CTACGAAAATTGGTGGTGATAAAGGAGACGAGGCAGACGACGAACCAGAGGGCGAA  
GAACCGCGGCGTCGAGCTGCTCAAGTTCGACGACGTTGAGCGGCTGGGCGCCCAGAA  
GAATCACCCGGAAGTTCCCCCAAATCGACCGATCTGTGCACCATATCGTACACGTCTG  
GGACCACGGTAACCCGAAAGGGGTGATGTTGACACACCAAAACGTGATAGCGGGCA  
TAAGCGCGGTTCTCGTTCAATTGGGCGAGCACAAGCCCTCGTACAAGGACACGATGAT  
CAGCTTCTGCCACTGGCGCACATGTTGGAACGTTGCTGCGAGAATGGAATGTACATG  
GTGGGCGGCTCCGTAGGATTTTACAGCGGCGATATCAAAGGTTGTCCGAAGATATGA  
AAGCCTTGAGGCCTACTGTGATGCCCCGCTGTGCCAGGCTGTTGAATCGAATGTACGA  
CAAGATCCAACTGAACTTCAAACTCATGCTTGAAAAAGCTGGTATTCAGCCTGGGG  
ATGCGGGCGAAGGAAGCGGAAATCAAGAAGGGGATAATCAGGAACAACAGCATATGG  
GATAAACTGGTCTTCAGCAAGATCAAGGAGTCAACGGGAGGGAGGGTGAGGCTGATG  
GTCGTTGGTTCCGCACCTTTGGCGGGAAACGTTCTCACATTCACGAGATGCGCACTTG  
GTTGTTTGATCGTCGAAGGATACGGCCAGACTGAGTGCTGTGCACCGATCACTCTTACC  
GTTACG

>novel\_circ\_001826

ACAACGGTCCTTGTCTTGGCTGGCGGGATGGACCAAACAAACCATATCAATGGCTACA  
TTACAACGAGACCCTGCTCAGGGCGAAGAATTCGGCTCTGGCCTAGTGTCTCTGGGG  
CTGATGCCAGGATCGCACACGCTCATCGGTCTCTACAGTCAGAACTGTCCAGAATGGA  
TCCTCACGGAGCAGGCTTGTTACACGTA CTCTTTGGTAGTAGTACCTTTATACGACACA  
TTGGGGCCCTGACGCGTGCGCCTTCATCATTAATCAAGCCGAGATCAATTTGGTCGTGGT  
CGAGAACGATACCAAGTGCAATTTGCTTCTCGACAAAGCGCCAAGATGCCTACGAAAA  
TTGGTGGTGATAAAGGAGACGAGGCAGACGACGAACCAGAGGGCGAAGAACCGCGG  
CGTCGAGCTGCTCAAGTTCGACGACGTTGAGCGGCTGGGCGCCCAGAAGAATCACCC  
GGAAGTTCCCCCAAATCGACCGATCTGTGCACCATATCGTACACGTCTGGGACCACG  
GGTAACCCGAAAGGGGTGATGTTGACACACCAAAACGTGATAGCGGGCATAAGCGCG  
GTTCTCGTTCAATTGGGCGAGCACAAGCCCTCGTACAAGGACACGATGATCAGCTTCC  
TGCCACTGGCGCACATGTTGGAACGTTGCTGCGAGAATGGAATGTACATGGTGGGCGG  
CTCCGTAGGATTTTACAGCGGCGATATCAAAGGTTGTCCGAAGATATGAAAGCCTTGA  
GGCCTACTGTGATGCCCGCTGTGCCAGGCTGTTGAATCGAATGTACGACAAG

>novel\_circ\_001828

GGGCCAAAGAACGCGACGAAATATTACATCGCTTGCCAGGCGCCAATGGAGTCGACTG  
TCACCGACTTTTGGAGGATGATATGGGAGCAACAGAGCAAAGTGATTATCATGCTTACC  
GATCTCGTTGAAAATGGGGTGGAAGAGTGACGAGTATATTCCGCCCTCGGAGGTCA  
CCGACTGTCGACGTTTGTACGGCGACTTCCAAGTCACCCTGAAGAAGAGGGGAAACCA  
AAGAAAAATACGCCATCTCCACGCTTCATTTGAACAATTTGGAGAAGAACACGTTCCG  
AGAGGTATACCACATTTGGTATTTGTGGCCCGTGAACGGAGTGCAATCGGACGGTGCC  
GGGTTGATAGCCGTGCTACTCGAGGCGAGGGCACTTCAAAGGGGTGGCCCTGGACCC  
ATTGTAGTCCACTGTAGTCCCGGCACTGGACGCACGGGAACGTTAATAGCTCTTGACCT  
AGGAATTAGACAATATGAGATTACGAGGACTGTGGACGTGCCAAGGGTCGTTTACACT  
ATCAGACGGGATCGTGCTGGGGCTGTCAAGACGAAAGAACAATACGCTTTCATTTACA  
AG

>novel\_circ\_001830

AACGCATCTGCGAAGGCGAAGGAAGCGACATCGGGATCCGCGACAAACACCTCGAGC  
AACGGTTCGAGCGGGAACAATGGGGGACACGCGCCACTTCGCCGCTACACATCCCTG  
GTAACAACCCTGATCGAGCAGCACCGTAAACTGGATCGCAGCGCGAGCGAGCCGACC  
TCCCGGTACAAGACCGAGTTGTGCAGGCCGTTTCGAGGAGAGCGGGCACCTGCAAATAC  
GGCGACAAGTGTCA GTTCGCTCACGGGTACAGCGAGTTGCGCAACCTCGCCCGCCAC  
CCCAAATACAAGACCGAGCTGTGCCGCACGTTTCACACGATCGGTTTCTGCCCGTACG  
GGCCCCGTTGCCATTTTCATCCACA ACTTCGAGGAGGCACGGATCCACAATCAGAAAGT  
GAGCGCCCAACTGGGTTCACCCAGCCCAACATAATAAGCCTGAACCCGTTGTTGAGC  
GCAGCGGCGGCCGCGGCCGTGGCCGCCGTTGGAAACGGGTGCAACGGATCCAACGTG  
AACTCGAGCAGCAACGTCTCGTTGCTCGAGCAGATCGTCGCCTCCCCCAGGTGACGG  
CGATCGCCGCCGCGGCCACCACCCCCAACCTGATGAGAACCAACTCGTTGAGCCTGTG  
CAACTCGGGCAACGTGTACAACCCACCGCCATTGCTCAGAACCAACTCGTTGAGCTTG  
ACGACCAGCCAACACCATCACCACCACCACCACCATCACCACCATCACCAGACCGGTT  
CCACGAGCGCGAGCTCGGTGATCGGCGCCACCAGGCCCAAGCCGTTGAATCTCAGCC  
CGACCTTCTCGCTCGGCAGCACCGGGGACTCGATTTACCTTCGTCCAGCCTCAGCCA  
GTCGCCCACCAACTCGATGGCGAGTTTCTTCAGCGACGACTGTAACCAACAACCGTCC  
GTGACCAGCCTGCCACCACGCCGTTTCAGCTTCGGCCAGGATTTTCGGCCTTCTCGCGA  
CCAGGCAGAGCCCCAGTCCGCGAACCAACAGCGTTTGCAGCCCGTTGGGCTCGGACG  
AGCTCGCGCCAAGGACACCGTCCCCGTTGTGCCCCAACGCCGAGTCCAGGCTCCCCG  
TGTTCAACAGGATCAGCAGCACTCTCGCCGACTTCGACAATCTTAAGATCTAAAGGGG  
GCGCTCTTCTTTCCGACTCCTGGGTCCTTCCACTCTTTG

>novel\_circ\_001831

GTGCTGGTGTTATTTCTATGGCCAATTCAGGACCAAATAGTAATGGATCACAATTTTCA  
TTACATTAGCACCTACACAATGGCTTGATGGAAAACATACAATTTTGGTAGAGTTCATT  
CTGGTATGGCAATAGTAAAAAGAATTGGATTGGTAGAACTGACAAAAATGACAGACC  
TGTTGATGATATAAAAATTGTTAAAGGTTCCATAAGGAATGCATAACGAAATAAATATCT  
TCTTG

>novel\_circ\_001833

GCAACCATCACCAGGATCCGGCACAACCGGCACGTCCACAGTTTCCTCGAATGCTCCG  
GATGGAGAAAAATGGCCAAAGCATCAATTTATATCCGGTGGGAAGCGTGGGTCCAACAC  
CAACGAACCCAACAACGGCTACACCAATCACGACCACGGCAACAATATCATTGGCCAC  
CCCTGGAACCAGAACCCAAGAACCTGGACCCAGTATCACCAGAAGCGTATCAGCACC  
CACTGCACCTAGGCCAGTCGTCCAAGTGGCTGCCAGTACCTCCAGCAACAATGGCACA  
CAAAAACCGAGATTGAGGAGGACTATGAGTCGCACTGAAGCTATCAGGAACCTACATCA  
GACGCGAAACAGCGCAATTCTTTGGGGTGGACGAGGAATCTGAGGCTGTGGAGAGAC  
AACGATGGCTCGATCGGAGACGGAGAATGGCGTCGAGGAAATACGGTGCCCTTGTTCC  
GGAACACAGACCACCGGATCCTGATATCACCAGAGACGTGCCGGATATTACGGATGTG  
CCAGAAGGTGTTACATTGAGAAGATGGCAGCAACCTGTAAGACGAAAAGATTCTGTG  
GCCAGAATGACGCTTTCGGGGCTTCATTATGTCGTCGAG

>novel\_circ\_001834



GCAACCATCACCAGGATCCGGCACAACCGGCACGTCCACAGTTTCCTCGAATGCTCCG  
GATGGAGAAAATGGCCAAAGCATCAATTTATATCCGGTGGGAAGCGTGGGTCCAACAC  
CAACGAACCCAACAACGGCTACACCAATCACGACCACGGCAACAATATCATTGGCCAC  
CCCTGGAACCAGAACCCAAGAACCTGGACCCAGTATCACCAGAAGCGTATCAGCACC  
CACTGCACCTAGGCCAGTCGTCCAAGTGGCTGCCAGTACCTCCAGCAACAATGGCACA  
CAAAAACCGAGATTGAGGAGGACTATGAGTCGCACTGAAGCTATCAGGAACTACATCA  
GACGCGAAACAGCGCAATTCTTTGGGGTGGACGAGGAATCTGAGGCTGTGGAGAGAC  
AACGATGGCTCGATCGGAGACGGAGAATGGCGTCGAGGAAATACGGTGCCCTTGTTCC  
GGAACACAGACCACCGGATCCTGATATCACCAGAGACGTGCCGGATATTACGGATGTG  
CCAGAA

>novel\_circ\_001835

GTTGAAAAAATTGTTACAATCATGGCTAATCCTAGACAATACAAGATTCCCGATTGGTT  
TTTGAATAGGCCAAAAAGATATTGTAGATGGTAAATATTACAGCTCACTAGTTCTTATTT  
GGATTCAAACTTCGTGAAGATTTGGAACGAATGAAGAAAATTCGTGCTCATAGAGGT  
TTGCGTCATTATTGGGGTTTACGTGTACGTGGTCAGCATACAAAACTACAGGTCGTCTG  
TGGACGTACAGTGGGTGTATCGAAAAAGAA

>novel\_circ\_001836

ATCCGGAGGATGAGCTAAAACGGAGAACGAAATAGAGAAGAGCGGAACGGACGAGT  
CATCGACGAATTTTCCTAGGTATGCAGCCAGCAGGGAGGATGCAACGGTCGATGACGT  
GAATCGACCGACTTTTCGGTCGATAACTGCCCCGCCACGATTGGCAGCCTCTGAATGGCT  
GGCCAACCGTCCCGTTCTCACTTCTGTTCGGTGGACTGTTGTGCCCCGGTACCGGATAA  
CCGGCCTATAAGTGC GTTTTCCTCCGAACGAATAATCCTTTATTCCGTTCTGTATATCCA  
TTTCTCTGTATTACCAAATGCTGTTTCGTGTACGGTTGAAGTGATCCCCTTGACCGTCTCC  
GAGTTTCTTCGAGCCGCTCCCCGCTCCGCGCGATCGTTGGAACGAGCAGTCCCCCCA  
CCACCGCGCCACGAGTTTCGAGAGGAGTGGGGGAAGAGGGCGAGCAGAAAGGCGGGA  
AGAAGAACAGGGAAGAAGCGGCCTATTCTCTGTTTGGAATAACAGTTTGTCTGAAGGTC  
GTTGGCGAGCATCTTCCGTCGCGTAATCGAAAAGTTGGAAATAAAAAGAGAGAGGAAC  
GAAGAGAGAAGGAGTTTGTCTGGAAGGTTCTTCTTTTTCTTTTTTCCTTCTCCTCCTCTC  
CCTTTCCCCTCACCCGTGGAAGACAAGTGGCCACTTTCTCTCTATCCTCTCCTCAGGGG  
TCGGCGGATGAAGGCAAAGTGGACGGCGAGCAACGCGGAACACCGGCTCTTTCGCTA  
CGCGCCTCGCCCTTGATTCAGAAGGACGGCCACGTGCACGACGACGGCGCGAGATAAT  
CGGTATCACGGGGAATCACGTTCAATTTCCCCACCAACTACGGCCACATGACTTGACGAT  
CGCCCCACCTACCGCTGTTTCGTTCGTTGAGCGAAAGCGGCGACAGTGGCAGCAACGTG  
ACCGACGTGGGGAGGGCGAGCGCATCACGACGACCACGACGACGATCGGCGACACC  
AACAACGGCGACGACGACGACGACGACGACGACGACGACGACGACGACGACGACGACGACGA  
CGAGGAAGAAGGAAGAAGAACGGCGGAGGAGTAAGTCATCGTTACTACTCGCAAGG  
CTACTTAACGAGTGACATAGGCCGTTGGTGGTTCAGTTAGCCGCGGACGGTCAACCCA  
GGTGCAGAGAGTCGTTTCGCGCTCTTTTATCCTTTTTTCTTTTTTCGTTATCTCCCCCTCCC  
TCTTCCGTTCTTTCTTTTTCTCCCCCTTATTCCACCTCTATTTTCGCCTTTTTTCTCGAACGA  
CTTTTCGGGTGGGTAGAAAAAGATTCCCCAAGATTGGATAGATAGATAGTTAGATAGTT  
AGATAGATAGATAGGTAGATAAGTGTGATCGTGGTGACTGTGCTGGTGCCGTTGTTTG  
TTGTCGTTGTTCTTCGGCTCGGGAAGTAGCGGTTTTTCAGTGTGGATAGTGCGGATAACA

GTGACGAGTGTGAAACTGGAGCCGCAAGCGGTAGAAGCAGTTGCAGTCGAGAGCTAT  
CATGTGCCCCGCGGAGGATCTTCGGACTGGCCATCGTCGCGCTGGTGA CTTTGGTGG  
CGAGCGGCAGCCTATACGAATCAGTGGGCAGTGCATATCGAGGGGGGACCGGATGTGG  
CCCAGCAGGTGCGCGGAGAGCATGGATTTCAATATCTCGATAAG

>novel\_circ\_001837

ATAGTGGACGATTGGTACCACATGGTGCACACGTCAGTCGTGAAGAGATCAGCGGAAC  
CGCATTTTCGGGGTGCAGGGGAGGCTAATAGAGGACCGCAGAGTGCCTCGAGCTGAGC  
AACAAACGGGTAAAATCGAGAACGAAACGGGATCTAATTATTAAACGCGGTCCGTCCAA  
CCTGAGAACAGTTCTCAACGACGAGATGTGGCCTCAGATGTGGTACTTGAACAGGGG  
AAAGGGGTTAGATATGAACGTGCAGGAAGCTTGGGCTGAAGGAATTACGGGACGCGG  
AGTCGTGGTCACGATTCTTGATGACGGATTGGAGAAGAATCATCCGGATCTTTATAAGA  
ACTAC

>novel\_circ\_001838

ATAGTGGACGATTGGTACCACATGGTGCACACGTCAGTCGTGAAGAGATCAGCGGAAC  
CGCATTTTCGGGGTGCAGGGGAGGCTAATAGAGGACCGCAGAGTGCCTCGAGCTGAGC  
AACAAACGGGTAAAATCGAGAACGAAACGGGATCTAATTATTAAACGCGGTCCGTCCAA  
CCTGAGAACAGTTCTCAACGACGAGATGTGGCCTCAGATGTGGTACTTGAACAGGGG  
AAAGGGGTTAGATATGAACGTGCAGGAAGCTTGGGCTGAAGGAATTACGGGACGCGG  
AGTCGTGGTCACGATTCTTGATGACGGATTGGAGAAGAATCATCCGGATCTTTATAAGA  
ACTACGACCCACAAGCCAGCTACGATGTCAATAACCATGATGAAGATCCCATGCCACGA  
TACGATGTTCTAGACAGTAATCGACATGGCACCAGATGCGCTGGTGAAGTGGCTGCAA  
CTGCTAACAATTCCTTGTGCGCGGTAGGAGTTGCATTTGGAGCTGGCGTCGGGGGAGT  
GAGAATGTTGGACGGGGACGTGACGGATGCCGTGGAAGCAAGGTCTCTGAGCCTGAA  
TCCTCAACACATCGATATTTATAGTGCCTCATGGGGACCTGACGACGATGGAAAAACCG  
TCGATGGTCCTGGCGAACTTGCCACTAGAGCTTTCATCGAGGGGATCACAAAG

>novel\_circ\_001839

ATAGTGGACGATTGGTACCACATGGTGCACACGTCAGTCGTGAAGAGATCAGCGGAAC  
CGCATTTTCGGGGTGCAGGGGAGGCTAATAGAGGACCGCAGAGTGCCTCGAGCTGAGC  
AACAAACGGGTAAAATCGAGAACGAAACGGGATCTAATTATTAAACGCGGTCCGTCCAA  
CCTGAGAACAGTTCTCAACGACGAGATGTGGCCTCAGATGTGGTACTTGAACAGGGG  
AAAGGGGTTAGATATGAACGTGCAGGAAGCTTGGGCTGAAGGAATTACGGGACGCGG  
AGTCGTGGTCACGATTCTTGATGACGGATTGGAGAAGAATCATCCGGATCTTTATAAGA  
ACTACGACCCACAAGCCAGCTACGATGTCAATAACCATGATGAAGATCCCATGCCACGA  
TACGATGTTCTAGACAGTAATCGACATGGCACCAGATGCGCTGGTGAAGTGGCTGCAA  
CTGCTAACAATTCCTTGTGCGCGGTAGGAGTTGCATTTGGAGCTGGCGTCGGGGGAGT  
GAGAATGTTGGACGGGGACGTGACGGATGCCGTGGAAGCAAGGTCTCTGAGCCTGAA  
TCCTCAACACATCGATATTTATAGTGCCTCATGGGGACCTGACGACGATGGAAAAACCG  
TCGATGGTCCTGGCGAACTTGCCACTAGAGCTTTCATCGAGGGGATCACAAAGTTG

>novel\_circ\_001840

ATAGTGGACGATTGGTACCACATGGTGCACACGTCAGTCGTGAAGAGATCAGCGGAAC

CGCATTTTCGGGGTGCAGGGGAGGCTAATAGAGGACCGCAGAGTGCGTCGAGCTGAGC  
AACAAACGGGTAAAATCGAGAACGAAACGGGATCTAATTATTAAACGCGGTCCGTCCAA  
CCTGAGAACAGTTCTCAACGACGAGATGTGGCCTCAGATGTGGTACTTGAACAGGGG  
AAAGGGGTTAGATATGAACGTGCAGGAAGCTTGGGCTGAAGGAATTACGGGACGCGG  
AGTCGTGGTCACGATTCTTGATGACGGATTGGAGAAGAATCATCCGGATCTTTATAAGA  
ACTACGACCCACAAGCCAGCTACGATGTCAATAACCATGATGAAGATCCCATGCCACGA  
TACGATGTTCTAGACAGTAATCGACATGGCACCAGATGCGCTGGTGAAGTGGCTGCAA  
CTGCTAACAAATTCCTTGTGCGCGGTAGGAGTTGCATTTGGAGCTGGCGTCGGGGGAGT  
GAGAATGTTGGACGGGGACGTGACGGATGCCGTGGAAGCAAGGTCTCTGAGCCTGAA  
TCCTCAACACATCGATATTTATAGTGCCTCATGGGGACCTGACGACGATGGAAAAACCG  
TCGATGGTCCTGGCGAACTTGCCACTAGAGCTTTCATCGAGGGGATCACAAAGGGTCG  
CAACGGTAGAGGGTCGATTTTCGTCTGGGCGTCGGGGAACGGCGGCAGGGATCACGA  
CAACTGCAACTGCGACGGTTACACGAACAGCATCTGGACGTTGTCCATCAGCAGCGCG  
ACGGAGAACGGCCAGGTGCCTTGGTACAGCGAGGCGTGCTCGTCCACCCTGGCTACG  
ACCTACAGTTCCGGTTCATCGGGGGAGAAACAAGTGGTGACCACTGACCTGCATCACC  
TTTGCACGACCAGCCACACGGGCACGTCTGCATCGGCGCCCTTGGCAGCCGGTATATG  
CGCCCTCGCCCTCGAGGCCAACAGAGATCTGACTTGGAGGGATATGCAACACATCGTC  
GTGAGGACAGCGAAACCTGCCAATCTGAAAGCTATGGATTGGGTGACCAATGGTGTTG  
GACGAAACGTGAGCCACAGTTTTGGTTATGGCTTAATGGATGCAGCTGCCATGGTGCG  
GTTGGCCAAAAGATGGCGAACAGTACCGGAACAACACAAATGCGAGGTGTCAGCACC  
ACACATGGGCAGGCCAATACCACCAAAGAGCCAGCTAACTCTGGAATTGCACGTCAA  
GGAGTGTAGCGGCGTTAATTTCTCGAGCACGTGCAAGCAAAGGTTTCATTGATGGCG  
TCGAGAAGAGGGGATCTTCAGATACAATAACATCTCCACAAGGTACAAAGAGTACCC  
TTCTTGCAAAAAGGTCACACGACGTCTCGAAGGCTGGTTTCAATCAATGGCCATTTATG  
TCGGTTCACACTTGGGGAGAAAGGCCACACGGCACGTGGAACTTGAAATCCACAAT  
GAGGGTCGATACCAAG

>novel\_circ\_001841

ATAGTGGACGATTGGTACCACATGGTGCACACGTCAGTCGTGAAGAGATCAGCGGAAC  
CGCATTTTCGGGGTGCAGGGGAGGCTAATAGAGGACCGCAGAGTGCGTCGAGCTGAGC  
AACAAACGGGTAAAATCGAGAACGAAACGGGATCTAATTATTAAACGCGGTCCGTCCAA  
CCTGAGAACAGTTCTCAACGACGAGATGTGGCCTCAGATGTGGTACTTGAACAGGGG  
AAAGGGGTAGATATGAACGTGCAGGAAGCTTGGGCTGAAGGAATTACGGGACGCGG  
AGTCGTGGTCACGATTCTTGATGACGGATTGGAGAAGAATCATCCGGATCTTTATAAGA  
ACTACGACCCACAAGCCAGCTACGATGTCAATAACCATGATGAAGATCCCATGCCACGA  
TACGATGTTCTAGACAGTAATCGACATGGCACCAGATGCGCTGGTGAAGTGGCTGCAA  
CTGCTAACAAATTCCTTGTGCGCGGTAGGAGTTGCATTTGGAGCTGGCGTCGGGGGAGT  
GAGAATGTTGGACGGGGACGTGACGGATGCCGTGGAAGCAAGGTCTCTGAGCCTGAA  
TCCTCAACACATCGATATTTATAGTGCCTCATGGGGACCTGACGACGATGGAAAAACCG  
TCGATGGTCCTGGCGAACTTGCCACTAGAGCTTTCATCGAGGGGATCACAAAGGGTCG  
CAACGGTAGAGGGTCGATTTTCGTCTGGGCGTCGGGGAACGGCGGCAGGGATCACGA  
CAACTGCAACTGCGACGGTTACACGAACAGCATCTGGACGTTGTCCATCAGCAGCGCG  
ACGGAGAACGGCCAGGTGCCTTGGTACAGCGAGGCGTGCTCGTCCACCCTGGCTACG  
ACCTACAGTTCCGGTTCATCGGGGGAGAAACAAGTGGTGACCACTGACCTGCATCACC

TTTGACGACCAGCCACACGGGCACGTCTGCATCGGCGCCCTTGGCAGCCGGTATATG  
CGCCCTCGCCCTCGAGGCCAACAGAGATCTGACTTGGAGGGATATGCAACACATCGTC  
GTGAGGACAGCGAAACCTGCCAATCTGAAAGCTATGGATTGGGTGACCAATGGTGTTG  
GACGAAACGTGAGCCACAGTTTTTGGTTATGGCTTAATGGATGCAGCTGCCATGGTGCG  
GTTGGCCAAAAGATGGCGAACAGTACCGGAACAACACAAATGCGAGGTGTCAGCACC  
ACACATGGGCAGGCCAATACCACCAAAGAGCCAGCTAACTCTGGAATTGCACGTCAA  
GGAGTGTAGCGGCGTTAATTTTCTCGAGCACGTGCAAGCAAAGGTTTCATTGATGGCG  
TCGAGAAGAGGGGATCTTCAGATACAATAACATCTCCACAAGGTACAAAGAGTACCC  
TTCTTGCAAAAAGGTCACACGACGTCTCGAAGGCTGGTTTCAATCAATGGCCATTTATG  
TCGGTTCACACTTGGGGAGAAAGGCCACACGGCACGTGGAAACTTGAAATCCACAAT  
GAGGGTCGATACCAAGGTCGCGCCACGCTTACGAATGGGCGTTGATATTTTACGGGA  
CGTCGACGCTTCCCGATCGCACGGAATACGCGTTGTACAATCCCGCCGGGATGAACATA  
CCGAGAAGGCCATTCGTCAAACCGCGCGAGACAGTGTTCTCCAAGGCTCAGAACTCT  
CTCACGAGCTCGAAGATCAAGCAGAGCCAGCACAAAGTCGGAGAAGCCGGGTAGTCTC  
AGCCCGCCTTACGTGGTGAACGCCCAGATACAGTCGCAGAGGAAGAGCAAGGCGCGC  
GGCCAGCACAAAATGGCAAATCGGCCAATAAACCGACCCCGAAGCCGACCGTGCAG  
ACGTTGAGGGGGTTGACCGTGGCGAGGGGGCCTAACGTCGCGGGGGAGGTACGCCTG  
ATCACGTCCAGGCCACGAGGGAGGAGCACACCAAGCCCTGTCACGACCACTGTCGCG  
CACCAAACCAGTCCGCCCACCGCTGTTCCAACCACAAAAGTGGCCAGCAGGCAAAGA  
ATCGTGGACGTGGCGACTGCCTCGTCCCTTCAGAGGGGTTTGATCCTCTTGAGCCAC  
CAGCGAAACCTGCCATCAACAACGTGCCAGCCATTTTCCAACAGTATCCCAAGATTCA  
ACAGCTCTATCCATTGTATCCTGTCTATCCCGGGGTTAGAGGAGCCGGCCAGCAACACG  
CGACCAGGGCCAAGGGGTGGAATTGCTGCAGGATGAACAGTTTCGATTGAAGAACT  
TGGATAAGGACACCCTCGACGAGTTCAAGCTAGTGTTCTACGGCACGGAAACGTCGTT  
GGAATTCGACGACGAGTTGGACAAGGACAAACCGTTGCCACCGGTGAACCAGCAGGA  
CGTGAGCCAGGACAATACGGCGATAGGCGGAGGCACAACGTGATGGACACGGAGGG  
TGGTCCGTGGACAGGTAGCCAACAGGTGGAGCGCGTGTCCCATCCGGAAGTGCAGAG  
GCCACGACCGAGAACCAGACGAGCGGTTGCAGCGGCATCGACACTGGAAATGGCAG  
GTGCCTAG

>novel\_circ\_001844

GAGCCGCAGCCGCATCCAGGGTGTACGTGGACGCATTGTCTCGATTAGCACGCCAGGC  
GCAACTGGGTACATGGGGTGGTTCCAAGGATGTCGGGTTCGCGCTGATGAGGATCGTC  
GAGGTGTACAAGGAGATACAGGAGCAGGAGATGAATATCCTGAAAGCGTTCTACGTCG  
ACCTACTGGTCCCCCTCGAGACGAATCTGGAGAAAGACACCAAGGTCGTGCAGAGCG  
AGCAGAAGAAGTTTCTGCAGCAGCACAAAGACCAGGTCCGAAACTTATAGCAAAGCGG  
CGGCCACGATGAAGAAGCAGAGGAAAAAGTCGAGGGGGCGCGAGCAAGAGTGGACTG  
GCCATGGACAAAGAGCTGAAGAATATGCAGATCCTCGAGGAGGAGAAGTCTAAGCTA  
GACGCCTTTTGTGAACAGAGTTTGAAGAATGCCATGACTCAGGAACGAAGAAGGTAC  
GGCTTTGTTCTCGAACGACAATGCTCGTTGGCGAAACATTATGCGAGTTTTACGAGGT  
CGCGTTAGCTGCTCTTCATCCCTCGGTTGATAAGTGGCGCGAGGTAGCTGCTACCAGGG  
AATATTTACCCCAATCCGTGGAAGATATGTTTCGCTTCCAGGCTTAGACAAGTATCATTCT  
GGCCGGAGGACGAAGAGAACGGTGGATCCGAATTAACGATGAGCTCACAATTGAGAA  
AGACCAGAAGCATGGATAGTTCTTGCTTGGAACTTCGACCTGGGCCGCCATCCGAAA

TGTGCCAAGTACCACTTATCAAGGTCCGACCTCGCATCTTTCATCCGCCCTCTCGAGAG  
CAAGATCGGAGGCCAATCTCCACGCTTCGACATTGTCCCTCGATCCAG

>novel\_circ\_001846

GTTTGGTGAGGATGCGTATCTGGTTTGACCTGATAATTTAACAGTGCGAGGCTGATAAA  
TAAGTTGAAGAAAGTAAGAATTAAAAATGATGGATCTGAGATCATTTTGACGAACATTA  
AAGGTATATTTGATTGAATTAATAAGAAAGTTTTTAATTAACGTGTAACGTGAAATT  
ATCTTCTTTTCTTTTCTTATATTTTCGATAGATATCGTAATGAATGACAGGAGTAATGATT  
TCCAAGTCGGCTCATTAATTGAGATATTATAATTGCTTTACAAGCACATTCCAACCTCAA  
CATGAGTCGAAGTTTCATTAAAGTGAATCTTTGATGCACGAAAATGATGCATATAATAC  
GATTTACGTGGAAGAGGAGCGAGTTATCGGACAAGGATTTATTAGAATCGTGAAACA  
AATAGTCGTTTCTACACATTGTATCACGTTGATTGATTGTTTCTTCTTGAAATTGATCGT  
CGGTGTAAATTTCCGGTATAATCTGATTGCCGTGTTAATGTAAATCACAAATCGTTCACG  
ATTTGTTAAGGAAATTAGCTATGAATTAATAATTTGTAAATTAATAATCGAAAAGTAGAG  
CAATTATTTAGTGAAAAGGTAAGATTATATTTTAATAAATATATGTACGGTGAATAGTTTA  
ATTTTTTAATCGATAAATTGTTTTTTTTTAGAAAAATTCCGAATAAAAAGGAAACTGCG  
TGCGCAAATGTGTAAATTGCATTTTTTATATTTATATTTATTTAAGGCAAAGAATTTTAA  
TGTAAGAAAATGGAGAATATTTTTATTTTAAAACAATCGCAATAAAAAGAAACAAAGGA  
GGAAGATAAGAATTGATTTAATTAATTTATCGCATAGAGCGTGGTGGGGATAGTCTAGTT  
TAAGACTATTGTTATTCGAGAAAGTCGAATCAGTATGCCAACGGAGGTTTCGCGCG

>novel\_circ\_001847

ATGCAATCCATGGTTCGTGCGATGCATCAAGCCGAACACGGAGAAAGCGCCAATGAAG  
TTCGACATGCCTTGCGTCCTCGAGCAACTAAGGTACACAGGGATGTTGGAGACGATTC  
GAATTCGAAAAACTGGTTATCCCGTCCGACTTCTCTTTGGACATTTTCGTGGACAGATAC  
AGATATCTGGTTTCCACGCATCTGCCAGAGGGCGCACCCAACAAGGAACCTTTGTCGTAT  
CATTTTGGACAAAGCTGCGCCCAAGGACGCGCAAGCCCAGTATCAACTTGGCCTCACC  
AGAGTATTTCTGAGAGAATCTTTGGAAAGGACTTTGGAATACAATAGAGCTCTGATTTT  
GGAAAGGGCTGCCATAACTGTTCAAAGATACACGAGAGGATTTCTAGCTAGAAGAAGA  
TTCCTGAATATTTACCGGAGCACGGTGTTGATTCAAGCTGTTTATCGTGGTTATCGCGA  
GAGGAAGAAGTTCAAGTCGTTGAAGAAAGGTGTACTTATGGCGCAGAAGATATACAG  
GGGGAAAAACAGCGTGAGAAGTTCAAAGTATTGAAAGAGGAAATGGCGAAGAGGG  
CGGAGATCGAACGAGCGAGCAAAGAAAGAGCCAAGGCGAAACAGCAAAGGGAGGA  
GCAAGAAAGAACCTCCAGAGCCGTGGCCGGTGTTAATCATTTGGAAATTCCTGCTGAA  
CTTGCCTTCATTTACAGCAAACCTCGATG

>novel\_circ\_001849

ACTTTGTCATAATCATGGCACATGCTTGGATCTGATCATCATCGATCGTCATCGAAAAAC  
ATTGATGTCATAGATCATACGTTGCTACTAAATAATCCTTCGCCAGTTTTAACATGGATCT  
TCTTGGATCTATCTTCATCTTCTGTAAAAAGGGGTAAAGTTGGTTTTTTATTTAATATTTTAA  
TTCATACAGAAATTAAGATTGCCAGTTTATATTGATTTTCGAGGTTAGATGAATTTATT  
GGACACTGATTTATTGGATAGAATTTTACAAAATTTTTTAATACTTATCTTTTATAGTTCT  
TTTCAAAAATTTTATTCAATATTGTGATTGTGTATATTTTGATGTCTCTGATATTTCTTC  
TATTCTATTTTTTTTTTATTTCGTTTTAAGAAATAGAATTTTGATAATTGAAATTTAGGTAAT

CATTATTTTAAATAAATATTTTATTAAAAATTCATTTCGTTGTACTTCAATTACAATTATGAT  
TTTATAATATCCTTTTGAAAAAATAAGTTTTCTCTTTATCAGCAAATGATAATAAC  
GAGGAAAATTATTTATTATAAAAAATTGGTCATAAACATTTCGAAGAAAAAAGATATT  
TCCAAATTTTCCAAAATCAAAGTCAAAGATACCATTGAAATTATATAGAACGAAGAAT  
ACATCGAATGAAAATGAAGAAAAAATTGTCTTCTTAGGAAAATAACGTTTCGATATTA  
TAAACGAGACGACGATATCATTGCTGTCCAGAAAAATTTTTATTCTTTCTGATGCAA  
TAAACAACGAATCTTACATTGATGGTATCAGTCGTATCTAGAAAAATAGTATAATCGTAA  
CATGTGTTCTACACTGCGAACGATACATAGTATGTACAGAAGATTCTGTGACGACCAGA  
ACGAAATTCATGCCATTGGAAACAAGAGAAGACATTGCGATCTCGACATGCCATCATC  
GGGCTGTACACGATTTAAAAATGAACACACAACGGCACGCGGAGTCGCATTGTCTTC  
TTTGTGACAATGATGAAAATTTGCACGAAACAACGCAGAATCTTTCGACGCGTGATT  
CTCAACGGTGCGAAACAAGCGCGTAACAATGTCTAAAGAATGATACGATCCATTCTTTT  
CTAAGATAAACTGACGTCAACTAGAAAAATTGGCTAGATTATTCTTCAGTATTTCCACTC  
AGGCTCGGTTTCATCATCGGTTGTGCTCTCTTCCATTTCGTTATCTTACGAATTTTATTGA  
GGTATTGGTTAACTCACACCAATATCTGGCATGATCTCTGCACGTTCTCTCTCTCTTC  
TTTCCCTTTCTCTTTTAAAGTAACTTTATTCGTGATCGCCATGTGATCGAAGCGACG  
ATCGAAGCGACGATCGAAGCGCCCTCATCTTGACGAATATTTTTTACGTAAAATCTAA  
CAGGAAGATTGGTGTGTTATACTGTTATATCCATTCTCAGCATCGATATCGATAAACACA  
CAATTAACACGAGATCGTGCACGTTTCTCGAAAATGTGAATTTTCTTCGATGAACGA  
ACGCGATTACTGCCCCTGCGCATCTCTTCATACGGTTTAGAGCTGAACCTGCCTTGA  
ACCAGGAAATTTGTTGCTCGTTTCATGGTGTGATTTAACGTGATCTTGTCCACTTTCCCAT  
CCTTGTGTTTGATTTCTGCTTGAACGGGCTGTAATAGAGGAAAGAAATTAGGATCAGAC  
TCGTTAATAAATGACGACACTGTTAGGTGACAGAATAGAACCTTTTCGATTGGAAATTTG  
GTTGTTAGCCAAGATTTTTTTTATTCTAGAAAGGATATGGATTAAAATCGTTATATAGGA  
ACTAAGGATTGCCTCATATCCTTGAATACTTGAATGGAATCCGATGATAGCTATATATCAT  
AATGTTAGATATTTTAAATGTTTCTTGATCGACTATATATGGATGACAAATTTAAATTCAA  
ATATATCGCGTTGCATATTATAACTCAATAAACTAAAATAAACTAGAAATAAAATAAAT  
CGAAAAGCATAAAGGATACATGGATGTTTGTATGAAAGAATGAATAGAATTTTGAACAA  
TTAATTAAATCAATAATACATAAAGGAAAATGTAAGTAGTTGGGTATTTTTCTCGAGAA  
AGATAATTGAATCATTAATGAAAACGTACTTTTCCAGGTGCCAAATCGTTTAATCCAAG  
AAGGCTGATCTTATCAGTAGGTTGAATCTTATCGTAATCGCCAGCATTGGCGAAGGTGA  
GAGGCAACAATCCTTGTTTCTTCAAGTTGGTCTCGTGGATACGTGCAAAGCTCTTAACG  
ATAATGGCACGGCCGCCTAAGTGCTCGGCTCCAGAGCTGCGTGCTCTCGGGACGAAC  
CCTCGCCGTAGTTCTCGTCGCCAACTGCTACCCATTTGACGCCATTTTTCTTGTAATGCC  
TGGCAACGTCCGGAACTTTACCCCACTCGCCAGTAAGCTGGTTCTTTATTTTGTTCATC  
TCGCCATTTTCTGCATTCACAGCTCTATAAAATTGGTCGAAATTCAATATATTTGTTTAAA  
TTGTAGAACAGTCGAATAAGCGAAGAGAAGAAAGATCTTCAATCTTCAAACATTTACC  
CTATGAACATATTGTTTCGAGATATTGTCCAAGTGGCCACGATATTTCAACCATGGGCCAG  
CAGCCGAGATGTGGTCGGTGGTACATTTTCTTTTACTTTGATTAAAACGGTCAAATCG  
GTGAGATCTTTGCCGTCCCATTTGTGCAACGGTTCTAATAATTGCAATCTCTCGCTCTTC  
GGGTTACGTCGACTTTCACGCTGCTGCCATCTGCTGGTGGAGCGTCATAAGTGTCTTG  
GCCAGGGTCGAAACCGCGGTTTGGAAAGTTCATCACCTGGAATAACATGATTTCTTGGA  
AAATTTTCCAATATTTCTATATTGTTTCATAATGAAAGAAATCTTCTTTCATTATGAA  
ATTATCAAAAAGTACATTTCCAAGGAAAATAATGTTTCGAGAATTGCCAGTATGTAAAAA

ATATATCGTGAAATATTTTCATAAACGAGTTTCCTTCGAAAAACACACTTATCGTTGAAAT  
AATTGTCTCAAAGATACCGAAGAACTTTGTTCTTTCCATAAAAAAGTGAATAAATAGAT  
TCACGAATATTTTATCAATCTCTCGCTGTTTATCCACGAAATAATCTCGTAGAATGAAAT  
AATTA ACTACATTTTTTTCTTCTCGTCATCAAATTAAATAATTTCAAAAACAGAAATTATAT  
CAAATATTTTCGAAATCTGATTCAATCTTCTACTATTAAATAAATAGTAAAATTAAATGTAA  
CGTTGTAAATAACCAACAATTTCAATTCAATATGCAGACATATTGATTAACTCATTACAAA  
AATAAATATCACAGATTGTGACTCATGTTTAACTGTCTGCAGACTAATAATAATAAAAAA  
GAAAAAAGAAATCAAGTAGAATTTCAATTGTATTTGAAGTTATTAATGAAGCCACGATT  
TTGAATTATTCTTGAATTAATTCTTGTTACATAAGTTGTGGTTCAAGTTCAAGATAATC  
GAATCATTGTTTAAAATTATCTCGTAAACAATGAAATGTTTGTGATAAAATAATTCACGA  
ATATATATACGCGAGTGTACGTCGTATTTACCGAACGGATCTTTAAGAAGGAATTCCTTT  
CCATCCTTGGCCTTGAGCTTATCGGTAACCGGATTAAAGTCCAATCGGCCAGCGAGCGA  
AAGAGCAGTGACGAGTTCAGGGCTGGTGACGAAAGCGTGTGTGCGCCGATTGGCATC  
GTTTCGACCCGTGAAATTACGATTGTACGATGTGACGATCGTGTCTTATCACCTTCTT  
GATGTCTTTACGATCCCATTGACCGATGCAGGGCCCGCAAGCGTTCGCCAACACGGTG  
CCTCCAAATTTTCGAAGAATTTCGGCCTAAATTAAACGAGGAAAATCTTAAGTTAAGTA  
GTGATATTTTTTTTTAAATAATTTTATTATACATTAACGATTTCAAAATATTGAAGAATGATT  
TTCAAATATCATTTTTTCAAAAATCCTCTCCCCCTTTGTAATATTTAGAATTTTTCCAATAGG  
TTCTAACATTCTTTTTTTAACTTGGCTAAAAATTTTAAAACGCATCTCTAATTGTACCC  
GGATCGATCTGATTGTCATCCATTGATCCCCCGATCACGAGAATCGACAAGTCACTATTT  
TTTCCCTTTCCCATTTGTCAAATACATCGAAGCCAAATTAAGAATTTGGCGTGGGTCGC  
GTAAC TTGTTTCTAAGTGACATGTACCAATGTCTGGCACGGGTTCAAAGTAATCTGTGC  
AACTGTTACCGCCCAATCCTTTATACCAAAGCATCTAGTTCTAGAAATATACGTATATATA  
CTTACTATTCCGTACGCTCGATCGTGGCACGAATTTGTTCCGAGCCTGGCGTGACATT  
GAACGCCGATTTTCGCTTTCAATCCATTATCGATGGCTTGCTTAGCGATATTAGCGCAACG  
ACCCATGTCTCGTAAGAGCTGTTTCGTGCAGGAACCGATCAGGCCGACCTTGATCTCG  
TTAGGCCAGCCATTCTTCTTGGCAGTTTCACCTGGTTTGAATTAGTGCAGACAATATGA  
GCTTTGGCTTTTTCTTCAAACCTCTTTACCTCTTTCTCTTGGAATTAATAATTAACCTCGT  
GTAAATATACATAGCAGGAAATTTTACTAATCTTCTAATTACCTGAAGTTATTTTATAA  
CGAAGAGATTGATCGATATTACAAGAGAATCGATTAAAAGAAATAACTGGATGAAAAA  
TCCAATTCAATCGATTACTACCCAACTTAGAAATGGGATGAGCGAGATCGGGCGTGA  
ACGGTCCGTTACGTGTGGCTCCAACGTAGAAAGATCGAGCTCGATGATCTGATCGTAT  
TTAGCGTTGGCGTCGGCAGTGAGAAGGCTCTTCCTGTGCAGATCGGCCGCGTTTGCGA  
TCTCGGATCGTCCAGTCGCCCTCAAGTAATCCTGCATACGAAAGTTGTAGGGGAAGAT  
GGACGTTGTGCGCCTATCTCGGCGCCCATGTTGCAGATGGTAGCCATCCCAGTGCAAC  
TTATGCTCTCGACACCTGGCCCATAGTATTCGACGATGGCACCGGTTCTCCTTTACC  
GTCAGGATACCGGCCACCTTGAGAATGATGTCCTTGGGACTCGTCCACCCCTTGAGGG  
CCCCCGTCAGCTTACCCCGATCACCTTGGGGCATTTCAACTCCCACGGTATGTTGGCC  
ATCACGTCCACGGCGTCAGCGCCACCTACACCGATGCAGAGACAGCCCAGACCGCCTC  
CGTTGGGCGTGTGGGAGTCGGTGCCGATCATCAGCAGACCTGGAAATGCGTAATTCTC  
GAGGATGATTTGGTGGATGATACCGGAACCGAGGTTCCAGAAACCGACGCCGTACTTG  
GCACCGGCCGTCTTCAGGAAATTGTACACTTCCTTGTTGATGTCCTTGGCCCGTTTCAA  
ATCTTGCTCGCCACCCACTTGGGCCTCGATCAAGTGGTCGCAGTGGATCGTCGAGGGC  
ACGGCGACTTTTGGCAGTCCTGCGAAGAGAATTCAGAATTTTCG

>novel\_circ\_001850

CGAGATCTATTGCACGGGAGAGCTGCTGAAGACGATACAGCTGGCTGAAATCTTCCCA  
GACAGCAAGACGTTTCGTCGATCTTCATCAGATGAACGACCCCGAAATAACTCTCTCCA  
ACTTCTACAGTTTGTATGAATGAAACGGGGAACAAACCGAGTAAAAGTCAGCTGGCGA  
GATATGTTAATGAAAATTTGCCTCGTCGAACGAGCTCGTGAACCTGGACGCTGCCAGAT  
TGGACGGAGAGCCCTTCGATCTTGAAACGGATCAACGAGGCCAAGTATCGCGAGTGG  
GCGAAACATCTGAACGAAATTTGGAAGGAATTGGCGAGGAAGATCAATCCAGAGGTG  
GCCGAGTATCCTGAGAGGCATAGTTTGATATACGTGGACAATGGATTCATCGTTCCTGG  
CGGTCGGTTCAAAGAATTTTATTACTGGGACAGTTACTGGGTGATTGAAGGTCTGCTGT  
TATCCGACATGTATCAAACCTGCCAGGGGAATGATAGACAATTTCTTATACATGGTGAAG  
AAATATGGTTTCATACCCAATGGTGGCAGAATTTATTACCTTATGAGAAGCCAGCCACCT  
CTATTACATCTGATGGTCTCAAGATATTTGGACTTCACTGGGGATTACGATTATTTACGTT  
CGATTATATCCACTCTGGAAACTGAATTTTCTTTCTGGCAGCGAGAGAAGATGATCGAC  
GTTGAGAAGGATGGAAAAATATATAAAATGGCGCATTACGTGGTTAATAGTACCAGTCC  
TCGACCAGAAAGTTACAG

>novel\_circ\_001851

CGAGATCTATTGCACGGGAGAGCTGCTGAAGACGATACAGCTGGCTGAAATCTTCCCA  
GACAGCAAGACGTTTCGTCGATCTTCATCAGATGAACGACCCCGAAATAACTCTCTCCA  
ACTTCTACAGTTTGTATGAATGAAACGGGGAACAAACCGAGTAAAAGTCAGCTGGCGA  
GATATGTTAATGAAAATTTGCCTCGTCGAACGAGCTCGTGAACCTGGACGCTGCCAGAT  
TGGACGGAGAGCCCTTCGATCTTGAAACGGATCAACGAGGCCAAGTATCGCGAGTGG  
GCGAAACATCTGAACGAAATTTGGAAGGAATTGGCGAGGAAGATCAATCCAGAGGTG  
GCCGAGTATCCTGAGAGGCATAGTTTGATATACGTGGACAATGGATTCATCGTTCCTGG  
CGGTCGGTTCAAAG

>novel\_circ\_001852

TTTCAGGACATGGATGGCTCGTCGTCGGAGAACCTGACGGCTTGTCGAATCCTACCGC  
AATATAATTGGCCGTTATTCCAGATGTCGTTTTTCTGATGAGCTACCTGCTGCCACTGA  
TGCTGATATGCTTCTTTTACATTTGCATGCTCATCAGGCTCTGGCGCACCGATCGCGTCA  
GTGCCGAAAGCCGTCGTGGAAGAAAACGAGTCACGAGGCTGGTCTTCGTCGTCGTTG  
GCGTTTTTCGCCTTTTGTGGTGCCCTATACAGGTGATACTAGTGACGAAATCGTTGGAC  
GTGTATCCATTGACATCAGCGACGATAATGGTGCAAATAGCGAGCCACATTTTGGCATA  
CACGAACAGCTGTGTCAATCCTATCCTTTACGCCTTCCTCAGCGACAGTTTTTCGAAAAG  
CTTTTCGAAAAATTATTTACTGCAGACCTCGATCGGAGCAAAACAGACAATTGGGACC  
ATTGACGAAGACTACGAGAGCTGCCAGTACCGGTGACATCATTTAG

>novel\_circ\_001854

TACGTGATCTCGACGAGTTTCTCTCCGAGAACGGTATTCCCGTGGATGGAGTGGCCG  
GCGGCGGACAAGGGACGATGCAGAGCGGACAACCTGCACAAAATGAACAACACCGAA  
ACACCAGGGCACCAAGGCCAGCCGGCCTCCACTTAGAGCCGGTCACCAAACGCGAG  
AGATCACCCCTCGCCGAGCGAGTGTTGCTCACCCGACACTATGAACCCTCCCTCGCCCCG  
CGGATTCCACGCTCTCGATGGCCTCATCGGGGCGAGACTTCGATCCACGCACCCGGGC



CTTCTCCGACGAGGAGCTGAAACCCCAACCGATGATCAAGAAATCACGGAAGCAGTT  
CGTTCCGGATGACCTGAAGGATGACAAATACTGGGCGCGTCGTAGGAAGAATAACATG  
GCAGCGAAACGATCACGGGATGCACGTCGCATGAAGGAGAACCAGATCGCTCTCAGG  
GCCGGCTTCCTCGAGAAAGAAAATATGGGTCTACGACAGGAACTGGACCGGTAAAG  
AACGAGAACATGCTGCTGCGTGACAAGCTGAGCAAATACACGGACGTCTAACAGTGC  
GCCGGGCAAGCAACAGCTCGTCGTG

>novel\_circ\_001855

ATTCGATGACGGTCACGACGGATTTCTCGATTTATCCGAGCTGAAACGCATGATGGAGG  
TTTTGGGAGCACCGCAGACCCATCTTGGTTTGAAAGCGATGATACAGGAAGTAGACGA  
GGATGGCGATGGACGCATTTCTTCCGTGAGTTTCTATTGATCTATCGTAAAGCACGAG  
CTGGTGAATTAGAACAAGATTCTGGATTGGGGCAGCTTGCACGTCTTACAGAAGTCGA  
TGTGGATGAAGTAGGAGTAACAGGAGCTAAACATTTCTTTGAGGCTAAATCGAGCAA  
CTACGGAAGGCGAGCAAATTCGAAGATGAGATCCGCATGGAACAGGAAGAACGAAAG  
CGAGAAGAGGAGGAGAAGGCAGAAAGACGAGCGCAATTCAGACAGAAAGCAGCTTT  
ATTTGGCAATTGAAA

>novel\_circ\_001856

TTTTGTATTTTCATTGATTAATTAATATTTTAAAGTTGTGTTGTAATTACAGTCTTCCTTG  
TGATTACAGTATGTTTAATTGGAGTTTGATCTGTTGTTGTTGTTTGTGGATCGGCTACTA  
ACCAAGGACTTATATCAGAACTGCCGAATTATCATCCTGAAACAGAAAAAAAAAATA  
TCATTTATACTTTAAATTTTTTATGCATAAAATTTTAATTAATAAATATAAATAAAGA  
CATTTAAAAAAAAACAAGCACATGTTTGCATACAATTTGCTTAAGCTAAAGCATTTTTAA  
ATGAAACAAACCAAAAACTGTTACAGTTACTAATTATCAAGCATTTAAGATTGAGCCAC  
ACCTTGTGAGTAAGAGTCGTAGTAGTAGTTTGTATCTCTTCAGTTTTCACGACTCTCGC  
TCCATTTTTTTCTATTTCCGCTTCAGCTTTCTTTTCAACCATAGGTTGTATTTCTTTAAA  
GGATTAAGCAAGCCCAAAAATGGATTTGAATCAATAAACGGATTTGTATTTGTTTTTTT  
TCTTCTCTGTTTTCGTATCTTCCTCTGTATTTTTCAGAGATATTATTAGTAATTCGTTGTT  
ATTATCACTAGTAAATGGATTGAATGGATTTTGAGATTGATTTGAAATTTTAGGATTCAG  
TTGTGTTGTTTTTGTTCATTTGTCCCCAGCTATCTAGAGAAAAGTGTGTTACAGTCAC  
GTTGTCGTCAGCAGATGGATTTATCATTGTAGTTCCGCTCACTGAAAGTGTGAGTTTATC  
TCCTCCCTATATAAGAAATAACGCGAAAAAGCAAACAAGTCACATCTAAAGCTTAAAA  
GCAATAAAACAAACAAAAATAGTAAAAAAATTATTGAAATAAATTATTTATGTAATAATA  
CAAAATATATCTAAAAATGCAACATGAAAATAAAAAATGAAATTAATAAATAAATAAG  
TAAAAATATCTCGTATGTACGAATTTTTCAGATCTATTTTAAATATTTGTCAGTGACATTT  
ACATTTTATTACTACGTAATCCTAATTTAAATCGTAAATATAATCTTTTATAATGTATTTATT  
TAAAAAATGTTTATAATGCAAAAATAATTTAATTAATGAATAGCATTCTAAAAATTGGAA  
AGAAGTTTCAGCTTTTTTACTATAATAAATATATTTGAAATTTACTTATATATTTTATACGTT  
AACGATATTATAAAAGTTTAGTTTTCTTACCACCGATACAATTGTTGCTGCATCAGAGTG  
CTGATTGTTTTTATTAATAACTGTAGGTGTATCCATGGATGTAATTGAAACTAAATTTGAA  
TTTTTCCCTTGTTCTAAAGACTTTGCTTTTAATATATTGCATTTAATGATTCTAGAGGAA  
TAGGTGTACGCGGAGGTAGTGAAGAGGTACCACCAACTTGATTATTTGGTACTAAGGAT  
GTTTGATTACTTATATTTTCGATAATTAACTCGTTTTTCATTGGTTCTGATTCTTTTTCTGT  
ATTAACAATTGTTTGATTCTAGGTTCTAAAGGTTGCTGGTCTTTGGCCAGAGATTTCAA

TAAGGAATCTACTAAAGGCGAAGGCGTAGGATGTACGCTAGAATCTGAAGATTTTGTAC  
TACATTGACTTGATTGACGTTGTAAAGATTCTTCTTCATCTAAAAAAGAAACAAAAAAG  
AAAAATTTATTTGGAGAAAATTTCTATTTATATAATTATTCTGAATTTTTAATTATTGAATT  
ATTTAAATATTCGTTAACAGAATTAATAATTTTTATGCATACTAGTAATCACTGGAGCTG  
ATTGTGGTTGCTCCACTTGTTGACGCTGACGTTCTCTTAAACATGACTTTGACGGCGT  
GCGTATCTTTGACTTGTCGTCTTTCAAACGTACTGTTCTACGTGCTCGATTCAATTGA  
GTAGTTTGAAATTCTGTCTTACCCTATAACGAAAACGCGAACCCATACGAAAGAAGTT  
TTGACGTCCACTAGCACCTTTAACAGGTGCACGTAATCGAAAGAAAGCATGATGTTCT  
ACAGCACATTTCCATAAATGTTTACAAGCCTTTTCATTAACAAGCCTAAATACAAATGTA  
TGTTCTTGTTCTCCTCTTCCTTCATCATCTTCTTCTACTACAATAATGTTAATTTCTTTTT  
TTTAAATCTAATCGACCAATTTTTGGCCAAAAAATAATCCTATTTTTTGTTCTCTTC  
AAAACTAGGATTCCAGTTGGCGTTAAACCCAAAGAATATTCACATGCATCTTTACCAA  
GAACAGTATGCATATCTACACCATACATATCTAACCATTTGCTTTACTGAGATAAGCTG  
ATTCAGCCTGTGCTGGACTAAGACCAGAACATTTAGTATATTCTTCTAATATTTCAAGTT  
CCATTTGCTCTGTTTGACCTGGTACAAATCTAAATTCTGAACTGTAGCTGCACTATGTA  
TGGCAGGATCATAATCACCAGTTTCAAGCTACAAATATATACAAAATTTTAAAAAATATTA  
AAATATAAATTTTTTTTAACTTACTCTACTTATTTTTTTCTTTTTATTTTTTTAATACATACA  
TTGAAGAGCTAAAGCAGCCAAGTGTACAGCAACTTGATGAGGACAATGAAGTTTTCT  
TCCAAAACATCTTGTTTAAAGTTGTAAAAAGAACTGATATCTTGTTAGTTCTTCACGTAA  
AGTATTAGGTTCTGATGAATAAACTTTACTTTAAGCCGTAAAGTATATGGTGGTCCAAC  
TATATAAATATTGCTTATTAATATTAAGAAACAAATATAAAAGGTTTTAATAAATAGTT  
TAAAAAATGATACATTTATTATTTAATAAATAAAAAAGAAAACTATATAAGTATGCAA  
AAACATACTTTTTACTTGTTTTTTTATTGGTTTTGTAGGATCTAGCCAATGTTGAACATTA  
TTACTATCTGTATATTGCAATCCAAAATAATCTTTTTCTATTAAATCTAAGCTATAAAATAC  
TTGTTTATATAAATCACTAGCCAATGCTTTTTTCTGTAACACAAAAATATAATAAAATAT  
CAAAATTCATAATAAAATCTATATATAAAAAAATATATAGAAGAAATAATAAGAAAC  
TGAAAAAATATTATTTTTCTTTTTTTTTATTATATTAATCTATATATTCTAACGACAAGAAA  
TTAACATTTAATAATACTGATTTTATTATGATGACATTTTTCAAAAATTTATTTTTTAAAA  
AATATAAACGATAAAAAAATCTATTATTTTTTAATAAACTATTTTACTTACTGATAATTCTA  
TAGGCAAATCTGTGCCATCAAGTAATACAACCTCTGCATTGAACAACATTTTTATTACTTA  
GTAATCGTTGGTTTTTAATTTGAGAGGACGTAGTTTGTCCACTAACACTACGAGCTCTG  
CGTCGCGATAGAAATCTTAACATTTTATTTGACATATGTCAGAATAAATTTGCTGGTAAG  
CAATAACGATATATTGACCCAAAATGCTACATTCCTTGTTTTACATAGATATATGTTTTT  
CATGATACGTTGCGTCGGTTAATACGCCCACTTGACACGAAACACAAGTATAATATATT  
AAAACGATTAGAAAAAAATGTTAGTTAAAGGCACATATTAATAAATATTACAAAAA  
AAATTTTAAGTTACATTTATATTGTTGACTAGACATAATAATTCGCGAGTAATCGCGAA  
ATTCAAAGAATCCGGAGAAGATACACATCTCTCGGTTACAATAAAGCTACGGATATTTT  
TTTTATCGCTAATCAGATGGCGCTAGTCTCAATTTTGAGAATACAAACCATAGACAAAAT  
ATAAAATAGATCTACTATCTTAGAGAATTTTGTGTTTAAATATTTTGAAATATATAAATATCG  
AATAAGAAATCATAAATCATACAAAAAATTATGAAAAGATAAAAATATATTATTTAGAAA  
ATTAATTAATTAAGATGAAAATTTATAAATTGAATTAATAATTATAATGTCCTTTACCACAT  
AGAAAAGTATTTCTAAAATAATTAATGATAAATTATCAGTACTAAAATTTTTTATAAAGCT  
AATAAATATGTAATAATTATAATTTTACATATTTATTAGAAATTGTTATAATCGATAAATTA  
TAAAATTAATCAAATAGAAAATATTAATAGAATATTAGAAATTATAATATTAAAATTTTTT

ATATTTTAAAATATTCGTTTAAAATAATTATGATATAACCATCTTTTATAAATTAGTTCGG  
TTTGATTGTTAAAGTTTTTAATATGTTGAGATTATGTTCTATTTCGATTTTGTGTGTAATTA  
AAATTGTGAATAAATATCGTGTTTAAAATATATATTATTCGCTAATATTAATTTCTTTTATTT  
TTAAGTATGTATATTATGTATTGTTATTTAAAAGTGCTTTAAATACATTTATTCGTAATAGT  
TTCGCACATCTTATTTTCGAGTGTCATATACTTCATTATTATTATGAAAAAATGAGAATTTA  
TTGCTATATCAATACTAAGTTAATATTCTTTTATGAATGTCTAATTTATTTTAAAATATAA  
ATGTTATTTTTTTATTCAGTTTTTCATTATTCCAGTTTTTAATTATATATTCTATTTTTAATTTAAT  
ATTTTATAATGTGCATTAAATATAAATTCGATTTTCATTTCATATAAAGCAAAAATGAGAA  
ATTATTTAAATATTTTCGTCAATCAAATTCAAAAAATTGATATGTAATGAATAGAAATTAA  
AACTTGAACTAAATTTTAAATAAAAATAAATTTTAAATAAATTTTAAAGTATAAATTTTA  
TACTAATAATGATTTTTTTTTATAAAATGACATTTAAAATATTATAACATTATAACAATATTAT  
ATAAATACAATATAAATTGAAAAATAATAATATAAATTTTAGTTTTAGTAAAAATATATTG  
ATTATTACACATAATATCATAATGAATTATTAATCTATAAATTAATTATAAAAATTGATTAT  
TATAAATCCTTTTGTGTTTATTTTTTACAAATTATTTATTTTTTAAAATGACTTAAAATATT  
TTAAGATTGTATTATTTAACATTGTATAGATAGAAAATTATAATATTAATTTTTATTATTA  
TTATTAATTATATAATTAATTTATATATATCGATAGATTGATTTATAATCGGCAAAGTACA  
TATACTTTCGCCGAACCTTCGTAACCATTCTTCTCCATAAATATAAAGCAGGTTGCGTGA  
GAACGGTCATTTATCGACGAACCTTAATCGAGAGAAGGATGTTACAACATTTTGATTAAA  
TTTTTATTTATAATATAAAGAATAATTTTTTTTTGTATTATTTACTCTTATTTAACAACCTCTT  
ATTTTACATTTAATATTACTATAAAATATATTATAGATATAGTATACATATACTATTATACTTAT  
TATTATTTAATTTATTTTTTAATTAATTTAATAATTAATATTTATTTATTTAATTAATAT  
TTATTTATATATTTATTTTTTTAAACATTTATTTCTTAATTTACTTATTCCTTTAATTATTCAT  
GACTTATTTATTAATTTTACTTATGTTTCATTTATTTATTTGATGATTAATTTTAACATTTAT  
TTATCATTATATTTATATTTTAAATTTATCATTATATACTTTTTTTACTTTTAATTTACAT  
TTTTATTTCCATTTATTTCTTAATTTATATTTTTATTTATTTATTTATTTGATGTATAAATTCAT  
TTTTTTTATAATGTTATATTTTAATACATAAATTTATTTTTTGTATGGGTCTCAATGTAGT  
CACCTCCTCGTTGGTGAGACCTGGTAATTGGTATCAATTTTATATTGTATTAATTAATTA  
AAAATACATTTGAAAATTGTATTACAAATATTAGATTGTATTACTGAATTATATAAAAAAA  
TTAATTTTGAAAATTGATGCCAAGTTAAGAACTACACTAATTTCTTTTTTTATATTTTCAGA  
TATATTTTATATAATCTGTAATTTCTATTTAATTTATCTAGATTTTAATAATGAATAACAAAT  
AAATAACATAAATTATTCTAATTTCATAAAATTCATAAGCATTTTGAATTATTAAGGATTA  
TTTTATAATTCAAAATAGTATTTTCTTAAATAAATGCTAGATAAAAAGAAAAAGAAAAAT  
TTTTGAATGTATAATTTATTTTTTTCTATCTTATCCCGTCCTATTAACATAATTCCATTTTAA  
GGAAATTTGTAATGTATTAATAGAATCATTAAAACATCATTAAATAGAATCATTAAAACATC  
ATTAAAACAACAAATATTTGTTGTTGTTAAAGTTTTTTGAATCCTTCAATAAATAACGCG  
AAATTAGAGTCAGTATTTGTTTCGTTGATAATAATTTAATAAGTTCCGTTAATAGTATTTTT  
TTATAAGACATAAGTGAATAGAAAGTGAATATAGATAAGATAAGAATTGAACATGAGCA  
CCATCTCTTGCAAGCTAGAAACATCTCTTTAAAAAAATATTTTTCTAAAGGCACTAAGA  
GATGGCAATAATACTTCATTCTTCCTCTACCTTATCCTCTTTGGAGAAAAATCTTATCCTG  
TGATTCAAATACTTTTAATTTATAATTATTAACCTTTTGTTATATTCCCTTTTTATGTTTTCAT  
ACTTATTTATTGTAATTAATATACAATTTTTATTTCAAGTTCAGTTAGATTTAGTTAATTGT  
TATGTTACTTTTTTTTATATATCTCTTCTAATTCAACAACAATTAATATTTATGTTAAATCTT  
TTTTTTTATGTTTAAACATTTCTTTAAATTTTTTAAATTTTAGATTAAATAATTTTTCCATG  
CGACAATTTTTTTGTATTCTTTTTGTATATTAAAATGTTCAATTCTTTCTTATATCTTGCA

ACTTTGTTAGATTTAGTTAATTATTATGTTAAATTTCTTTTTTTATGTTTTCTCTTTTTTTTC  
TTTATTCAATTAACATTATTGTTGTTAAATTTCTTTTTTGATATTTTAATTCTTTTAGATTTTT  
TTAACTTTGAGATTAAATTTCTTCAACTATGCTTCAATCTTTTTTTACTTTATGGTACTTAAT  
ACTTGTGTTGCATTCTCTTCTTATGTGTTTATATATATATTTATGTATTTGCATATTTATTTAT  
TTTTATATTATAATTATATTATATATTTATATTAAATTTCTTTCACATATTGCAATAACAATTAA  
TTAAATCTTATACTGCTGCAACATGTAAAGAAAGAATTTAACATTGTAATACATAAATAA  
TGAATAAAACACAAAAAGAGTATATAATATAAAAAATTAATTATCATAAAGTAAAAA  
TTGAAACATTGGAGAGGAATTTAACCTCAAAGTTAAAAAAGTCTAAAAGAAATGAAA  
TATAAAAAAAGTATTTAATGGAAATATTATTTAAATTAAAGGAAATATTTAAACAAAAAC  
AACAAACAAAAATTTTATATTTTATATTTTAGATTTCTTTTATATTTTAGATTTTAGATTTA  
GATTTTTTTTTTGAAATTAAATTTCTTTAATTATGTTTCAGTCTTTTTTTTTACTGTATTATAAT  
TGACTTTTATATTACATTCTCTTCTTATGTATTTATATATATTTATTTATTCATTATTTATATAT  
AAATAAAAAATACTTATATATAAATAAGAATCATTATGATGCATAAATAATAAAAAGGGA  
ATATAATATAAGAATTAATTGTTATAAAGTAAAATAAGATTGAAAATAGGAAAAGAATTT  
AATCTGAAAGTTAAAAATCTAAAAGAATTGAAGCATAAAAAAGATTCAACAGAAAT  
ATTATCGAATATATCAAATATTAACATAAATATTTAATATATTAATATTTATATATTAATC  
AAAAAAATATTTGAAAAGAAAAAATAAAGTTATTTATGAAATTTACAATGTTTAATT  
TTTTGATTTAAATGTTTTTTCTAATTTAATTAACACTTCTGTAAATTTCTTTTTTGTTTTAG  
ATTTTATATTCTTAGATTAGGTTTTTTTTTAACTTTAAAGTTAAATTTCTTCAGCTATGTTTC  
AATTTTTTTTTTTACTTTATTATAGTTAACTTTTTTATGTTATATTCTCTTCTTATGTTTTTAT  
ATTTTATCATTATTTATATATATCATAATAATAAATTTCTTTTATATGATATAACATAATAATTA  
ATTAAATCTTACAATGCTGCAACATATAAGAAATATATTTTACATTATGATAATACATAAAT  
AATGAATAAAATATAAAAAGATATTATAATATAAAAGTTAAATTATCATGAAGTAATAAA  
AGATAATTAATAATATTGCAGAAGAATTTAACCTCAAAGTTAAAAAAGTCTAAAAGAATT  
GAAATAAAAAACAAGGACAATAATAGAAATATTTAAGAAAAATATTATCTAAATCAAGA  
GAAACGTTTAAACAAAACCTTAATTAAGCTTTTTTTTTTATATATGTTTTTTCTAATTGAAG  
AATTTAACTTATGTTATGCTTAACATTTATATTAAATTTCTTCTTTGATGTTTTAGATTTTT  
GGGTTTTTTTTTAACTTTGAGAATAAAATTTTTCTCTTATGTTTCGTTTTTATTTTTIATTTT  
ATAGTAGTTAATCTTTTGTTGTGTTACACTCTCTTTTAATTTTTTCATTATTCATTATTTAT  
GTACTATATTATTATTAATTTTCTTCTATATACCTATATATATATATATTTATTCTATATATATAT  
ATATATATATATATATATATATATTTATTCTTCCAATTAAATTAATTTATGTGTGAAATTATA  
TTTACACTCTATGTTTTTTTAGATTTATATAACTTTAATAATATTTTCCCTTTATATTTAAT  
TCTGTTTCAGATTGTGTTTCATCTTAATTTAAAATACCTTACTTGATTTCAATCTTTCCTAA  
TCTCTTTGAATCTTATATTATATATTTTTTCTCGTTTTTTTTTCATTTATTATTAATTAATTATG  
TTAAATATTCTTTTGTAAATTTTACGTTGATATTGTTTTTTTTTTTAAATATAATTTAATTC  
CTTAAATTTATTTATTTTAAATACAACCTTCTGAGTTTTGATTATTTTAAATTCAGTTATTAA  
ATTTATCAAATTCACCTTATATTGTGTTCTCTTTCTATTTTTTTTCACTTTTTATGAATTTAT  
TTAAGTTTTTTGTAAATTTCTTTTTTGTTTTTACTTTTGTATTACTTCTATTTAAGTTTA  
ATTAATCTTTTTATTGAATTCCTTCTTTGCATTATAAGTATTTTATTATCTTGTTAAATTAGT  
AATTTTATTAATAATTTTTTTTTTCCCAATAAATAGATCTTTACAGGATTCCAATGTTACA  
AGCAACAATAATTAATTTATATTATTTCAATTTTTTCGCGCGATTTTTGAATGAAAAA  
TAAGCATTATGAACCAGCCAATCAGAACATCTCTTAATTCGAAACGCGGGACGAATCG  
GTGCGCATTGCAGAGCGCAACGCAATGCGCATCATATTGCGCATGTCGTCAGTCTCTAG  
TTGAAAATTGTGTGGAGTGGACGTGTCGTCGCCGAATTCGGATTATTCGGTAAGTTATT

TTACTTTTATTATTACCAAATTTATCAATCATTGCTAATTTAAGTTTTTAAATAATCCATT  
AATATAGTGAAAACGAAATTAATTAGTTTTTTGCTTATCTTTGTGTCTTTTCCATCCATTG  
TTCATTTAGAGTCTATTGCGTCATTAGCGTCTCGTATCGAAATATTTTCGAGACAGAATTT  
GAAATCATATATTGGTTTTTAAATATAATTTTAATCGTATACGTTTATTTTACAATTTCTTG  
ACCTTTATTTTTTATCATTTCATCATATTATAATAAAAGAACATTTTACGGTTTATTACG  
TATTCATTTTCGTAAAATCGAAGTATTATTCTAATATCGCATATCTTTTCGAATGTATATATAT  
TGTGTATAACGTCTTCCCTCGTGTATGTTATTGTTTACTTTTTTTGGTCTATCGCTTATAAT  
TTGCTCGAGGCGAGAAACATTTCTTATGATATTTCACTTCCGAGAAATTGGATTTGTGTT  
CAAAACATGTTTCGACTTGTCGAATTGTCGAGCGTATCCCCTCTCCATCTTGTTATTCTGA  
TGC GCGAAATGGAAGCGCAAAGTAACATTGTTTCGTGCGATTCTTCGTGACAATTAGACG  
TTTGAAATTTTCTCGAGACATCTGTTCTATTTATTGCATAGTATTTTAAATATTATTTTTTTT  
ATACTACTTTTGTATTATTTCGTGCGTTAATTAATACGTCTTTATTCAATGTTTTATTACAA  
TTGATAGTTTTTTGACAATAAATAATTTGAGTTCCTCGTTTATCATATAATTGGAGTGT  
CGAATTACAAGATGGCTTATATCGTGAGTTCTTACTTGATTTGATTGTTTTGATACTTTAA  
TATAATCTAATTTTCGTACATATTATTCATTTATTTAGAAGTTTTGATTTTTCTCTGCGCAGA  
TTTAATCGAGGGGGGAAAAAGGCGAGAAAGAGGCGGGGAAAAAGGCGGGGAAAAATTCC  
AATATGGACGCCATGTCTTTTTTGGTGACTTTCTTTGGTGGTAAACTTTATTTTTATTTTCG  
TATGTATAAATTTTATTCTGTTTTATTGAATTATTAGTTTAGATTGTTGTTAAGCAATTCAT  
AATAAAATTATTAATTCTAATTAAAGGAAAGGGGAAAAAATTAAAAATTTATGAAAAATTT  
AACGATTTATCATTGGAAATTAATTTTAAAATCTGATAACGAACATTTTATTAAATTTCA  
GATATTAATAAATAATTGATAATATTTTTATACATAATTTATGATCAGTTAAAATAAAAAGG  
GAATATTTTCAGAACAAATGCTCGATAAGAAGAAGAAAATGTCAAAAAGATATTACTTT  
TTCTTCTATCATTCCCCACCCCTCTACTAATTTAATGTTAATTTTCAGAAAATATTTGTGAC  
CACGCGCAATGTGGTTAGTAGAATCAGTGTTTGCTTCGTATAGTATTTTGAATATTTTT  
TAGAGCACAGCAGCTCTGATTAAATTTAATTAGAATAATGAAACGCGAAGGTAGAATCA  
GTGTTTGTTTCGCCGATTATAATATATACGGACGCGTTATTAGTTTCTTATTTTATTTTTTT  
TTTTTTTATTCTCAATATTCGTTTTTCGGTACAGAGTAGAATCAGTGCTCCTCTCAAGAGA  
ATAGGGCGATCATCCACCACGCGAAGAGGTAAGAAAAATCATTAGATTCTCATTTTTTTA  
GATTTTAATCTTTTATATTAGAATTTCTACTTTTATTTATATTAAAATTTATTAGAACTTA  
ATTTTTTTTTTATTAATGTTTAAAGTTAAATATAGTTTTATTTTTTATTACTAATCCAAATTT  
TAAATAAAGAATATTATATTTTCAAGAAAAAAATTACAATACAATATTTCTCATTTTATTT  
CACAGATGCTGATGCTGATGATCTTTATGAAGATTTTATTTGTGACCACGCGCAATGTGG  
TTAGTAGAATCAGTGTTTGCTTCGTATAGTATTTTGAATATTTTTTAGAGCACAAACAGC  
TCTGATTAAATTTAATTAGAATAATGAAACGCGAAGGTAGAATCAGTGTTTGTTTCGCCG  
ATTATAATTTATACGGACGCGTTATTAGTTTCTTATTTTTTATTTTTTTCTTTTTACAAATAT  
CGTTTTTCGGTACAGGGTAGAGTCAGTGCTTCTCTCAAGAGAATAAGGCGATCATCCATC  
ACGCGAAGAGGTAATTATGCTTTTTTATATATCTAAATTTTTATTATTCTAAATAGAATACT  
TTTAGAATACTTTAGTTAACTAGTAATTTCAATATTAAATTAGTTAAAGTAATTTCAATAT  
T

>novel\_circ\_001857

GCTCGGCGATCGAAAAATTATGCGAGTGCGCGACGGAGGACAGCCTAGCTGACCGAG  
GCTCCGTGGTGAGGGCCGCGAGATGCCTCCTCGGCTCCGTGACCAAGGTCTCCTCCT  
GGCCGATATCGTTCGTGGTGAAGCAGCTCCTCCTCGCGAAGAAGAAGGTCGCCCGTAGC

CTCGGCCGCCTCGAAAGCGTTTCCAACCTTCACCGAATTCGTCAAGGCTTTCAGCCAGT  
TCGGGGCGGAAATGGTGAATTGGCGCATTTGACGGGTGACCGCCAAAATGACTTGA  
AAGACGAGAGGGCGAAGGGGCGCAGATGGCAGCGGCTCGCCAAGTTTTGGAGAGGAGT  
ACCATGATGCTGCTCACGTCCAGCAAAACCTGCCTTAGGCATCCGGAGTGTCGGTCTG  
CCAGAGAGAACAGAGACACCGTTTTCTGCCAGATGCGAAGGGCCATGGACTTGATACA  
TTACGTGGTCAAAGACGGTGTCTCGATTGCAGCGAGTCCCAGTCTTACTCCAATTCCC  
AG

>novel\_circ\_001859

AAACTCGAAAGAACAAAAGACTCCATCGCGCGACCGAAACGGAAGAAAAGAAGAGA  
AAACGGAAGAGGAAAAATAAAAAATTACAGAGAGAGAGAGAGAGAGAGAGGGGAGGGAG  
GAGAATCACCGGTGAGAATTGCTTCGTTTTTGCCACTGGCATTTCATATACAACAAGCTC  
GTTACTTAACACCTTCGAAAGAAGAAGGGAGAGAGAGGGGGAGAAGGCATTAAGTA  
AAAGCGGGCGGTGCCACGGAGCGCGGGATGGGAGAGAGAGAGAGAGAGAGAGAGAGA  
GAGAGAGAGAGAGAGAGAGAGAGAGAGAGGAAGGGAGGAGGGGGACACGGCCCCACT  
CATTCCTCGGCCTGTAACTTTTCAACGAACCTTGCTGCCAGACTCAAAAGCTCTCGGT  
AAAGCGTGATTTACACGTCACGGAACTTACCCCGTATTTTCCCCTCCCCTACGTCCGC  
CATTTCTCGGCCAACCCAACTCGGCTATGATTCTTTCGTCGAGGTAAAAATTCTGCCC  
GTTTCCCTCCTCGAAGAAATAATTGTTCTCATAAAGAGAACTTCGTGCACACGGATGT  
ATCGTTTACCGGAAATAATTCAAATTTGCATTTATCGAGTTTTTTCGGGAAGATGAGGA  
TGATGTATCGTTGTTGTTGCTTAGATCGCGAGCGAAGGAATTTTAAACTGCGAACTTT  
CAACGTTTGACATCTCGTTTGATGCGTTGATATGCATGTAGAAGTGGAGAGATTTTAA  
GTTTTACGCAAGTTTTATACGAATGGATTTTCTCTCTCCTTTGATTAAATTCGTTGGTCT  
ATTTTTTTTTTAAACTATCTTTAATTTTTCGCTCGATCCAATAGCGCGATTAATTCGAAAA  
CATTTGTGAAGTTAGATTAATATTAAATTGGGGCGAAGACGGGAATTCCGTGAGCTATA  
ACGATGCCACATATGAATCTTTGTGCAAGTTTAATATGTTGGTTAGGGATTTGCGTTAGG  
GCGTGGCAATTCTAATTTTACCAGGCCACTGGATATTGCGCAAGCTGTGCCCTGTGTGT  
ACAACTCGTAACCAACCACCCAACTAATTTTATAGATTGAAGTTTATGTTATTGAATATA  
TCCCATGATAGATGTTGTGAAAGTTATTAGAATGTTGCAAGATATTCCAATTTGGCGGTG  
TCTTCCGAGTCCATTTATCCATTAAAAGTATTGTTCTCAATTGATAATCATCAAATTGATT  
TTTACACGGTAAAATCGTAATTAAAATATTCAGAAAATCATATCATTGCAAGATCCTTTT  
TGTCTCGTTCCCGGTATCTTAATTAATTATCGAAATACAAAGACTTAAAGTATCCATAGA  
AATTAAGATTTTACTAATTGACTAAAACTTAACAATTTTTCTTGGAATCGCGTTCTTC  
CAGGAATCTGGAGTTTGAGATTAGTCAGTGAGAGGTCCGCAAATAACAAAGACGATAA  
ACGATCGAAAATTAACCTTTCTCTTTACGCGACGATATCTCGGGAACCGGAAATCGTATC  
GAGATAAACGAGAAAGCGTTTCAAAGGGCAAGGTTCTGTCCTTCCTTATGATCGTTCA  
CTCGTTGCCCCGGAATTGTTATCTTGAGAATTATAGCGGTCACAAAATTCTCCTAATTTT  
AACAAGCCTAATTTGCAAAGTCTTTATTAAAAATTACGGATGATATGATTCGAATGTTG  
TATGAATTGAAAAGCATTTCAAAGTTCCGTTCTGTTTCCAATGATGGCTCACTTCGTTG  
ACCGGAAGTTACTATGTTACAGTTTTAAAGTTTTCCCTAATTTTAATAGGATTTTCGCGAGA  
CTTAAGGTGATTAAAAATTCAAATTGAATTTTTCCAATTTAAAAGTACAAGGAGAATAA  
TGTATATGACGGAGAATACGGATACGGTAAATTTTAAATAGATAGAGGCAGGGATGAAA  
AATCGAACGAGCCGCTTTGCATGTTTATTGTCCGCGTGATTAAAGGCAAGAAAGTTTGT  
ATTAGCCATTAAAAAGTCGGGGGGGAGGAGGTACGAGTTGCAGAGAGGATGGAGCAA

GTTCGGTTGGACTTTAAATGAGAACAAGTCGGCGGGTTAAAGCGCGATTTCGCTCGTTG  
TTGCACGTGTTTCGCGTGGGCAATAAGCTTGC GTTAAAATTGATTAAAGGAAATTCGTA  
TAACGATTGCGATGCGCGGAAGACGTTGAAAATTATTTTATTTTATACGTACGGGGG  
AGATAACTCTCCAGTTTCGAGTAGTATCGAGTTCTGTTACATATTTAATTAGCACTCTCG  
TGATATCGAGAGTGTATAATTTATAATAATCTAGAAATTATTGAAATTCTCTCTCTCAC  
GGATATTTACAAATAATTAATCTTCGTTTCAAGAATTTTAGACTCGACTCGGTAATTTGTT  
ACATGTAAAAAAGAAAAGAATTAATTAATCCAATTTTATTTTATTTATTTTTC  
AGTTTCTCCTTAATAATTTCTTTAATTAAATAAATTATTAACGGGGATGATCTGGATTT  
AATTTAATTTATAATATCTTGAACTTACGCTTACTATAACAATTATTTCCATTTGTTTGT  
ATTATTGATCGTTAAAAGCTGTTGCAATAATTTACCCACTAATTTGTTTACATATTTTGAT  
TATAATTAATACAATATTGTATTATAACAAAGATGCAAAAGTAATATTACACGCTGTGAAT  
TATGAAATAATATAATTTGATTCGTTTCTCACACTATCAACAACAAGGGACGTATTATTT  
CCATCGCCATTATTACTCGCCGTTATTATTATTATTATTATTATTATTATTATTATTA  
GTCGGAGACTGCAATCATTCGAAAGATACGTCGGATGGGTTTTCTTTTAAAGGGACA  
AAGGAAATGTAAAGGGGGCAATATCGAGAAGGTAACCTTTATTTTCTTCCGTTCTCTT  
GCCTTTTACACAATAACTTTTCGTTTCTTGCTACTCTCTCTCTCTCTCTCTTCTTACG  
AGAGAAATAAACGCTTCTTTCTGCAATAACAAGATATAATAACGCTGTATAAGTAGGAT  
CGATTGACTGAACAGTGGAGACGTTGAAAATTATCGTTGATGATATGAAACGTGAGTT  
AATAATATATCGTGGGGAGAAAAATGTTTCGTCGTGATATTTAATTGGACAATTAATTTAT  
ATTAACATACTTTTTACATAACAATAACATCGTAACAACGAGCCAACTGATCAACATC  
CAAGAATGGTTCGTACAAAAATTTCTATCGATCTCTCAGATCATCTGAGATCGAACAAT  
TTTTAAAAGTGTTGATTAGTTTGACTTGTCTACTCGTATTATATATGCCAGTAAAAATTAT  
TAAATATACTGCAACACAATTGTTTTTTCTATCGAACTTCGTGGTCTGGGAGTGAACG  
ACCAGGCAAACCTACGTGTATTCTCAAGCAATAACAGCGCAAATGTGTGTTAATCCCCA  
AGAATACGCGTCGCCAACCTGGCCTATGAAGTCTATCCTTGATCTTCCTTCTTCTTCTT  
TCTTCTCCTCCTTCCCCCTTTGACAATTTCTTTCTTTCTTTCTTTCTGTCATCGTACTAGC  
CGATTCCGATTCCCTCCGTTCTCTGTAAAAATTTCCATCCCAATTGCGGAGAAAATGAA  
AATTAATTTACAAATTCGCGATATATTTTGAAGGAGAAATCGTTAAAATCGTTCTTTCTG  
TTTCTTTCTATTCTATCATTTTTTCAAATAATATAGTTTGGAGTTGATCGGTGAAAATGAA  
AATTAATACAATTCACGCGATATATTTTGAAGGAGAAATCGTTAAAATCGTTCTTTCCAT  
TCTTTCTATTCTGTTATTTTTCAAATGATAGTTTGGAAATTGATCGGTGAAAATGAAAAT  
TAATACAATTCACATGATATATTTTGAAGGAGAAATCGTTAAAATCATTTTTTCTTTCTT  
TCTATTCTCATTTTTCAAATGATATAGTTTGGAGTTGATCGGTGAAAATGAAAATTA  
TTACAATTCGCGCGATGTATTTTGAAGGAAAAATCGTTAAAATCGTTTCTTTCTATTCTG  
TCATTTTTCAAATGATATAGTTTGGAGTTGATCGATGACAACCTCCAAATTTATTATTTA  
TTACAATGAACGCGGTACGGAATAATTGAATAATAGTAGTAGTATTAATCACTCGAGATG  
AACTATGAAAAAATAATTAATCAAATATTGTTTTTTCAACAGCGACCGTATAAAAC  
GTAGGCGTGACAGGGCATAAACTAATGGAACACCGTTGTAGTCCCGAACAAGGAC  
TCCTCTCGTGAAAGGTTCTGCTCCTGATGTACGCGCATATCTGCATATTTCCGCACTCGT  
GTGGAACCGCGTGTTCCCCACGTTTCCGCGATTTAACCGTATCCGTATGGCGGAATGGA  
CCGTAAAGCGATGAAATACGAATGGATATCACGAACGAAGGAACGAAGATGAATATTAT  
ATTGGCGTGATATTTCTTGCGAGTTATAAATATCGAATATCTTCCAAATCCAAAAATATT  
AATCTCTCCTCCTTTCCATCTTTAGAAAATCGAAATTTGTTATTCCGTTTGATCTTTTCT  
ATTTTCAATGATTATTCAAAGTATTCTAATTTGAATCCAAAAATATCGATTCTTTCTG

ATTTTTGAAGAAGAGAGATTTTTAGGGTTTTATGTTTAGAAAATGGAAAATGTATTTTCAT  
AAATTTCAAAAAATCAAAAAATTGTACGATTTCATCCAAAATATTCTAATTCCGAGTC  
AAAAAATATCGATTCTCCCCTAATTTCTGAAGGATCCATTTTTAGAAAATCGAAAGCATA  
TTCCATTTTATCTTTTTCAATCATTGTCCAAATCCAAAATATTCTAATTCCAAATCCAAAA  
ATATCGATCTCCTAATTTCTGAAGGATCTTTAGAAAATCGAAATTCCATTTGATCTTTTTTC  
ATTTCAATTATTGTCTAAATCCAAAAATATCGATCCTCCCTGATTTCTAAACGATCCACG  
ATTCCATCTTTACAAAATCGAAATTTGATCTTTTTTCATTTCAATCATTGTTCAAATCCAAA  
ATATTCTATTTAATTTAATTTTCAAATACAAAAATATCGATTCTCTTCTAATTTCTGAAGGA  
TACCATCTTTAGAAAATCGAAATTCCATTTGATCATTTCATTTCAATCATTGTCCAAATC  
CAAAATATTCTAATTCCAAATCCAAAAATATCGATTCTATCCTAATTTCTGAATGATTCCA  
TCTTTAGAAAATCGAAATTCATATTCATTTGATCTTTTTTCATTTCAATCATTATCTAAAT  
GCAAAAATATCGATCCTCCCTGATTTCTAAAGGATCCACGATTCTATCTTTAGAAAATCG  
AAATTCATTTGATCTTTTTTCGTTTCAATCATTGTCCAAAATATTCTAATTCCAAATCCAA  
AAATATCGATGCTCCCCTGATTTCCGAAGGATCCATCTTTAGAAAATCGGAAGCGTACT  
ATTCCATTTGATCTTTTTTCATTTCAAAAAATCAAAAATTGTAGGAACGCGATTTCGAATC  
GTCGCCGTGCACGATATTCGTTGTACACAGACGGATTGTTTCGGACAAACAAGTCCGCG  
AGACCGCGAGAGCGGCAATCGAGAAATTTTCCATCCGATCGGTTTCACCGGCCGATC  
GTTCTTCGATTACAAAACGCGCGGAACGCCTCGCGTTACAGGCGAGCGCGCGCGATT  
ACAGGACAAGCCCCGTGTCGGGGGCGCAATTTCCCCGTGACGCGAACTGATAATAGAA  
CGTCACACAACCTGCACGAGCCACGTGGAAATATCGGCGACGATAATGAGAAACGCG  
AGTATCGAATGACGGAATCGTTCAATTTTACGAATCAAATTATTCGTTGAGTTCCTTTTT  
TCTTTTAACGTGGTTTAGCATGTTAATTGGCTTATTTTCGAGGATCGATTCCACGGATATTT  
TCAAAATACAAATTTTACAATCCAACAATTTTAAATTCGTCTCGAAGAAGCCAATTTCT  
AGAAAGAATCGAATATCACTACAACCTCGCAATAATTTCCATAAAAGGTGGACGGATTG  
TTCGTTACAAACGTGGCCCACATCCCAAATTCATTTCAATTATCTCACTTGTTCGAATGA  
TCGAGTGGATCATCGTTCCCCCGCGGATGGCATTACGGTTTTTCGATCGGGGCCGTTGTT  
CCGATCGAGTGGCCATCCAACGAATGCTCCACTTTGTTATCATCCGGCCCTCGAACGAT  
CCCCATCCACCAGCTTTTCTACACCATCGTTGTGGAAATTAGTCGACACGCGCGACAA  
GCGTTGCGCATCGCTCTGCCAACTCGCTCTGCCCCGTTTTCCATTGATTTAATCTTTTC  
ATTTAGCCGCAACGAGCTCCGTGAACGAACGCCAAAGAGACCGTGGATTTCATTTTC  
TTTGCGATTTTGCCGGAGGGAGAAAGAAAATGAAGTGAAGGAAGATAGATTGTGTGG  
AGAATTTTTGGCAA

>novel\_circ\_001860

GTCATATAAGGGATATGAAACGTTTCATTGATGAAAGTAGTAGTCATTTATCTATATTTTT  
ATTTGATCAATATCTTCAACAAAGTGTATAATTTGTTTATTACAGTTAAAAAGATATATAA  
ATTAAAATTTTCATGTTTTCAAATTTTCTATATATAAGTTTAATCCATGATAAAGCATACTCC  
TTTTTTTAGTTATTCAGAATTTTACATTTAGAATTAATATTGTATATTAATATTATTTTTT

>novel\_circ\_001861

GCGATGAAGATGAGCAAAGTGGGCAACCAGACCAATTCGCAGGACCCACAGGCGGTG  
AATCCCGGGTTTTTCGTCGGGAATCTAAACACGTTCCAGTGCAGCAAGACCGATGTGG  
AGCGAATGTTTCAGCGTTACGGCCGTCTGGCAGGAATATCTATGCACAAAGGCTATGCA  
TTCGTGCAATTCACAAATCCCTTTGATGCCCGGAGCGCCTGCCTCGGCGAAGATGGCC



GCACCGTTCTTAGCCAGATACTCG

>novel\_circ\_001863

AGGCGTTGGGGACCGGAAGCTCGTCGTGGCAGAGCGAGGATGGCGGACCAAACCTCGC  
GGCGAGGCGGCGAGACGCCCTCGTCTTGCGCGACCCCGACGTCGGCCAGTTTCCCGT  
CGGAGCCAGAGGTCGACGCCGACGTCGGAGTGAACGCCGACGGGAGCAACGCGACA  
GCCCCTTACCCCTGCCAATTCTGCGACCGCACGTTCCCCCGGCTTAGCTATCTCAAGAA  
GCACGAACAGAGTCACGGGGACCAAATGCCATACAGGTGCAGCTGGTGTGCCAGATT  
GTTCAAACATAAACGCAGCAGAGATCGACACGTGAAGCTTCACACAGGAGACCGAAG  
ATATCGATGCACGCACTGCGAGGCTGCTTTCTCCAGGAG

>novel\_circ\_001864

GCGAAGATTCGGTAATAGATCATCACAAAGGACAAACGCAACTCTGGATTTCAGAGGAA  
GAAGCGAATCGTTCAGGTGATATGGCGATGTGTGATGAAAACGAAAACGTATCTGGGG  
ATTACATGTTTAAAAGATACTCTCAGGATGCAATTAGAAAATCAAATCTTTCGATAAACA  
GTTGCGTTTCAATCGGAAGTACGATGAGTTCATATGGTCGTAAAAAACGAAGAGCACC  
ACAACCACCACGACGTTTCAGAAAATGTAGAAACAAATGAA

>novel\_circ\_001865

GTTTGTGCGCGGCGTGCATGTTGGCGAGAGTGGAGCAAGAACGTTTGGAGAGTCTCA  
AGTACGACAGGGCGACGATTTATATAAAGTGCGTGGAGGATAACGAGGATACGAAGTC  
GGAAAACGACAGTGAGATGCCCCGCCAAGAGACCGAAGCTGGAGAACACGAGGCCGT  
CGAGGACCAGGCGGAACTTGAAGGGGTCCCACGAGCTCAAAGTTTCCTCGGAGATCA  
CGTTGAAGGAGCTGAAACTGATG

>novel\_circ\_001866

GTTTGTGCGCGGCGTGCATGTTGGCGAGAGTGGAGCAAGAACGTTTGGAGAGTCTCA  
AGTACGACAGGGCGACGATTTATATAAAGTGCGTGGAGGATAACGAGGATACGAAGTC  
GGAAAACGACAGTGAGATGCCCCGCCAAGAGACCGAAGCTGGAGAACACGAGGCCGT  
CGAGGACCAGGCGGAACTTGAAGGGGTCCCACGAGCTCAAAGTTTCCTCGGAGATCA  
CGTTGAAGGAGCTGAAACTGATGACCATGCAAATTTGCGGCGCTGGACCTTACGACCA  
ACATCTAATGCTGGGTGAACACGAGCTGACCGATCATAGTCAAAGCCTCGCTGCTCTT  
GGTATATTTCCCGGGGCGCTTCTCACCTTGAAG

>novel\_circ\_001867

GGGTGGCAACGGTCTCGCTAGGAGGTATCGAAGCTGGCGCGTGGGGCGGGAGAGTCA  
GCGGTGGTCTGACTCTGGTTCCGGTGGTAGCGGCGGAAACGGAAGCCGCGACAGCAA  
CAGATCAGAGAGAACGACTGGAAAAGGCTGGTGCAGCCCGCTGGAGAAGGAAATTTG  
ATCGTCTTCTATTTTCTACCTTTCCCATCCCCGGTTGTGGAAAATTCGAGAGCGTCTATC  
TGCCATCGAAGAAAGCGTCGTCGACGGCGTGACACTGGGCCCCAACCACCTTCGAGC  
AAGAAGGCATACGAAATAGGATTAATCCATTCTGAAAAATCACATTTTAGGCTTTGTT  
GGAGGTGTACCACCTCCTCCTCGAGAAACACCCTTTTCCACCCTTCACGGGTAGTCAC  
GCTTAGCGCATCATTAGACAGGCATCATGAGCAGCGAGCTCGAATCCCTACGTCAGGA  
ATCGGACAAGCTGAAAAATGCCATTCA

>novel\_circ\_001869

ACGACCACCTTGATAGGACTATTGAAGACGGCTCGTCTTTTGCGACTCGTCAGAGTAG  
CCAGGAAGATCGACAGGTACAGCGAATATGGAGCTGCTGTTTTACTACTTTTGATGGGC  
ACCTTTGCTCTTAGTGCCCATTTGGATGGCGTGTATATGGTACGCCATAGGGAACGCGGA  
GAGACCAACGTTGAAGAGCAAAGTCGGTTGGCTCGATATACTTGCCAACGACACGCAT  
CAGTTTTATTTTCACAATAACACCGGTGGGCCGAGTATAAAGAGCCGCTACATCACAGC  
ACTGTATTTTACCTTTAGTAGTTTAACATCGGTGGGCTTTGGAAACGTGGCTCCAAACA  
CGGACACCGAGAAGATATTTACTATAATCGTTATGCTAATTGGATCTTTGATGTATGCCA  
GTATCTTCGGTAACGTCTCGGCGATCATTAGAGGCTTTACAGCGGCACAGCAAGATAC  
CACACGCAGATGCTTCGAGTTCGAGAGTTCATCAGATTCCATCAGATCCCGAATCCGCT  
TCGTCAGAGGTTGGAGGAGTACTTTCAACACGCTTGGACGTACACGAACGGAATCGA  
CATGAACAGCGTTCTGAAAGGATCCCCGAGTGCCTTCAGGCGGACATATGTCTTCATC  
TGAACAGAAATCTTTTAAACAATTGTAGAGCCTTCGAGGGTGCGAGTCCTGGTTGTTT  
GAGGGCGTTATCGTTAAAATTTAAACCACACACGCGCCACCCGGTGACACGTTGGTT  
CATCGAGGAGACGTGTTAACGTCCCTGTACTTCATATCGAGAGGAAGCATAGAGATATT  
GAAGGGCGACGTCTGTGATGGCCATACTCGCCAAGGACGACATATTCGGGGAGAATCCT  
TGCATATATCCGACCGTTGGCAAAGCGTCTTGCAACGTGCGAGCGTTGACCTATTGCGA  
TCTGCACAAGATACACAGGGACGATCTGCTCGACGTTCTGGCCCTTTATCCAGAATTCT  
CGAATCACTTCAGCCAGAATCTCGAGATCACTTTTAATCTGAGAGACGAGGAACAGGC  
TGGTGTGATCCAATATCAGCAAGGTTTCCTGTCTAGTACTCCAACGGACGTGATGCCG  
ACGCTAGGAGATTCGCTTTCCGTCCACCAAGATACCGTCGAGGACCCGGTGGTGGTCC  
TGGCACCAATCTTATCCCCACTGGTCGACAAGACTCTTTACAGGGTGATCAGGAAGATT  
ACGACAAAGGAAGTGGCCACGGAATTCTGGAGTTCAGCACCGACAAAGCCGGCCAA  
GATGTGACGCCATTGAACCTAGAATTCGACGAGCCGAAACAGAGGAGCTCCACGTTG  
AACTCCATAACCG

>novel\_circ\_001870

GTGGTGAAGATGTTGGTGGCCGTGGTGGTGTGTTTCGTCATTTGCTGGGGTCCAATTCT  
CGTGGATAACATGCTAACAGCTTATGGATACCTGCCACGCGTAAAAGTTGGCACGTACA  
AGCATCTTAACACCGCTTTTCAGCTGATGGCTTATTTTAACAGTTGCATAAATCCAATCG  
TTTACGGATTATGTCGAAACACTTCAGGGAGAGTTTTTTGGCCGCTGCCTGCGGCAGC  
TGGTGGATCTGTTGCCCCGAAGAGGGTACAGGGCGCCGGTGAGGAGGCATCCGAGC  
CTAAGCCAGACAAGGACGACCAGTATAAG

>novel\_circ\_001871

GCGGAGGAATGGCCAACCAATCCAGACGATTTTCTGGACTCTATTTTCAAGCTGGAGG  
ATAATCAATTCAACTTGATCGATAATGATTTAGACGCGATCCCTTCTTCTCGTCGGACA  
GCGGGCTGTCGAGCGCGCTGAGTCTCTTTGCGAGCAACAATTAAGCCCGCTTCTGCC  
GATCGAGGAGGATCAAGTGGAGATGAGTAATTCTGAGATGAGCAGTCCTCAGAATATC  
ATGGATTTTGATTTCGTTGGGCAGTCCTAATCAATCGATGGCCAGTATAGATAGTCCTGTC  
AGATCGGTGGTTAGTTCTAATATTGGTTCACCCGCCATGGATGTAGCCGAAGAAATGGA  
CGTGGAACACACCCTCGTGGCTGTGGTGAACCCGACTAACACCGTGATAGATGCTAAT  
ACGACAATTGTAACGGAGCAACCGGTTATCGATTTAGAGAAAACACCGAAGCCTCAAC

AGATTCACGTTGCATCTCCGGAAAATAACACGATAAATGTGCGCAATATCACGTGCAAT  
GGGAAACGGAATATCAGACAATTGATACGCGTTACACCGATGGGTTCCGGTAATCCAA  
GATCGATCCTACTGCCAGTGAGCTTGAAAGACATGAAAGAAGTGAGAACCATCAAGAT  
CATCAACGCTTCTCAGGCTAGAAATCTCAAAGGGTTCAAGATCAACCAGGCCAACATC  
ATTAACAAACCAGTTCAGATGAACATCAAACAAGAATTCAAAGAAGATTCCAGTAGCG  
AGAAGGGTTGCAATTCGAGCGACGAGGTCTCGGAATCGGATTCCCCGTATCCGAGGCT  
AAAACCTGAACGCGGAGGAGAAACGTCTGCTCCAAAAAGAAGGTATCACCTGCCTAC  
ACATTATCCGTTGACGAAGCACGAGGAAAGGGAATTGAAGAGGATCAGGCGCAAGAT  
TCGCAATAAAATTTCCGCTCAAGACTCGCGGAAGAGGAAAAAGGAGTACGTGGACGG  
GTTGGAGGATCGGGTGAAGCAGTGTACCGAGGAGAATATGACACTGTTGAAACGTATC  
AAGGCGCTTCAGTCGCAGAATCAGAGCCTGGCCGGCCAGCTGAAGAGGTTGCAAGCA  
CTGTTGCAAAAAGGCAACAAGAGCGCCCAGCCTGCCACTTGTCTAATGGTTTTGTTGC  
TCTCGTTGGCCCTGGTCGCTGTGCCGAATCTTCGGCCACACTCCAATTCAAACAATGA  
ACTCACGCAAGAGCAGGAACAGCCGGAGAAAATGCCACCTTTGGCGG

>novel\_circ\_001873

AGCTGTACTCTTTGCAAGGGATGGAGTTCCTGGAGGGTTTCGGGAAGAAAAAACAGC  
AGCCTAATCAACAATCGAACAATATATCGTCGGTGCACATCAATCCCCTTACGGCACAG  
TCTCTCAACATACACCTGCATGCTCTTTTCGCCGCAGTCGAGCATGGACACCTGGACAA  
AGCCAGAACGATTTTAGAGTCGACGGACGTAGACGTGAACAGCGTGAACAGCGACGG  
CCTGTCACCCCTGGATGTTGCGGTGCTCAGCAACAATAGGCCGCTTGCAAAAATGCTG  
GTCGCGTTCGGCGCACAGGAGGGTAACCAGT

>novel\_circ\_001874

TTGCCAAACGTCACGTCCGCGTTGAACAATATCACGATGCTGATGAAGGACAACATCG  
TGTCGGAAGTCAGCCAGGGTAAAGAGTCGTTTCTGAAAATTCAGAAAGACATTCAATA  
CGCCGTGAATCAGACCATCCCAGTCGTCAGCGCGAGCATCCGAAATGCCGGCGATTTT  
CTGGCCGACCTCGCGAAAAACATGACAATGCTCATCGATAGGATAAACAACGACATAG  
ACAAGGTTTACATGAAACAGATAGACGTTGCACGGACGAACATCGATCAGTATTCACC  
GTACAGACAAATGTATTTTCCCTCTAGGTACTATCTAGGACTCGGGATATCGGGCATT  
GTTAACAGTTCTGATGTGTCTGACTTTCGGTCTTTTCTGTGGCATTGTGGAAAGCGGC  
CCGATGGTTATGGAGACGACTGTTGCAACAAAGGATCCGGTGCACGATTCTCATGATG  
GCTGTTTGGATCATATTCCTTCTGACCAGCATTCTAATGGTGATCACGGTGATACACATG  
GTCGTGCGTGTTCTGGCGCAAAGAGCTGTCTGCGAGCCTTTGAAAAATCCACAGGATA  
ACAGGATGTTTCGCTCTGGTCGACGAGATCGTACAGATAAAGAAGATACTGTATCCGAAT  
AAACCGAATGCCGATGTGAACATGAGCTATATCATAACAACTGCCATCGAAACGAAA  
CGTTGTACAAAGTTCTCAAGTTGAATTATCTGTTTCGACGTGAACACGTTGCGCGAATAC  
ACCGGTCGCTACGACATCAACAACACGATTCAACAGCTTCGGCGCAAGATCAGTCTCT  
CACCCGGCGTGGTTATCCTCACGGAAAGCGCAAAGTCGAAATTGAACGATCTCGCGCA  
GAGTGGCCTCAGCGATATCAAGTTCTATCAATACGTGGAGATTCTCGCTGATAATATCAC  
GAATATCAACTTGGAACATCTCGCGAAACAATTGTTGGACGTGTCAACGGAATTGCCA  
AAGGGGCAGGACGACATTTCGAGCAAGTTTGGAGAAAAACGCACTGGATTGCGGTAT  
TATCACGAACATTTGGTGAAACCAATGGCGATGCTCAGCGAACAATTGGCAGCCAAGG  
CTGTGACCCTCGAGGAGAAGATAAAGTTTAATCATAGCTCGATGGCAGAGGCCATTCA

CAATCTCGTCGACGAGGTGACGAAGGCGCAAAAGTTTTTGAACGAAGATGGGCCAGA  
ATACGTGCAACAATTGGCTACTAAATTTGGAAACGCTTTCCTTCGTCAAGTGGACGATT  
TCCTCGAGAGAGTTATCGATCATGCTTTGTTCCACGTAGGAAAATGCACGCCCGTTTCG  
AACGCGTACAACGCCACGCTGGTCGCTGGATGTAGCAAAATTTTAGATCCATTTAATGG  
TTTCTGGGTGAGTGTAGGCTGGTGTTTAATCCTCTTCATCCCGACCATCGTGCTCTGCGT  
AAAATAAGCGCACTCTATCAAAAATCGGATCCCTATCCAGGACCCCTTAGTCGAAGC

>novel\_circ\_001875

CGTTCACGACAAGAAATACGTGTGCGCATAGCAGAGATCCTTACGCAAAATACGAAAGC  
TACGACGGTCCCGCGGGTGGATACAGCGATCGGGAAAGGGTGCCCGGGGAAGCGCAT  
CAGAGCACGTCCCCTACTATCATCTATTCCAGATATTCCGACGTGGCGCCGAAGTAATT  
CCACTCCCACGTGGCGAAGCCACGAACATACCGCCCCCTCCAAAAAAGAACCTCACA  
ATAAAGTCTTTAGCATATCGGTAGAAACGCAAAATTGTGACTTCCCTAACGGTGGTCCA  
CCCGGGTATCAGCCAGCTGCCGAGCTCCTCCACCACTAAGCACGGAATACGAGCGGC  
CACCTCCCTATTATTATTATCCTGGGCCAGGGTGAGTCGAAGGGGACACAAATTAGGAA  
ACAAGTGCCGTGGCATGCACAAAGGTAGCGCTGAATAGCGTGGCTACCCACAGTCTCA  
CCCGCAGTTACAAAAGGACGCTCAAAAAGAAAGAGAAATCCGGATGTAAACGAGACT  
ATGTTTAATATGTAGCGTTCCTGTTTGAGCGTGCCACGGACCGTGCGAACGGCAAAATC  
AAATTAAAGACCAAGTTTACGATATATACAGACTGAGGTAGGCTGAATGGATCCTTCGG  
CGAGCCGCAAGTAATGTGATCAATGT

>novel\_circ\_001876

AAATTGTGACTTCCCTAACGGTGGTCCACCCGGGTATCAGCCAGCTGCCGCAGCTCCT  
CCACCACTAAGCACGGAATACGAGCGGCCACCTCCCTATTATTATTATCCTGGGCCAGG  
GTGAGTCGAAGGGGACACAAATTAGGAAACAAGTGCCGTGGCATGCACAAAGGTAGC  
GCTGAATAGCGTGGCTACCCACAGTCTCACCCGCAGTTACAAAAGGACGCTCAAAAA  
GAAAGAGAAATCCGGATGTAAACGAGACTATGTTTAATATGTAGCGTTCCTGTTTGAGC  
GTGCCACGGACCGTGCGAACGGCAAAATCAAATTAAAGACCAAGTTTACGATATATAC  
AGACTGAG

>novel\_circ\_001877

AAATTGTGACTTCCCTAACGGTGGTCCACCCGGGTATCAGCCAGCTGCCGCAGCTCCT  
CCACCACTAAGCACGGAATACGAGCGGCCACCTCCCTATTATTATTATCCTGGGCCAGG  
GTGAGTCGAAGGGGACACAAATTAGGAAACAAGTGCCGTGGCATGCACAAAGGTAGC  
GCTGAATAGCGTGGCTACCCACAGTCTCACCCGCAGTTACAAAAGGACGCTCAAAAA  
GAAAGAGAAATCCGGATGTAAACGAGACTATGTTTAATATGTAGCGTTCCTGTTTGAGC  
GTGCCACGGACCGTGCGAACGGCAAAATCAAATTAAAGACCAAGTTTACGATATATAC  
AGACTGAGGTAGGCTGAATGGATCCTTCGGCGAGCCGCAAGTAATGTGATCAATGT

>novel\_circ\_001878

GTTTCCAAGGGAACAACAACTCTGCCCAATCACTTCTACTTCACCGATTTTCGAGAGG  
CATACGGCCGAGATCGCCGCGTTTCATCTGGACAGGCTGCTTGGATTCAGGAGGGCGA  
TGCCGGTTACGGGGAGAACGTTGAACCTAACGACAGAGATTTATCAGATCGCCGACGG  
CGAACTGCTGAAGACGTTCTTCGTCTAGCCCCGCCGGTAATATCTGCTTCCACGGCAAG

TGCAGTTATTACTGCGATACGGCGCACGCGATTTGCGGAAATCCGGACACCCTTGAAG  
GCAGTTTCGCCGCTTTCTTGCCGGATAAATCTTTCGTGCGGAGGAAGGCATGGAGACA  
CCCCTGGCGGAGGAGTTATCACAAGAGGAAGAAGGCCAGTGGGAGCACGATTTCGGA  
TACTGTTCCCTCGTGAAAGAGATCCCACCCTATCACGAGGGCAGAAGGTTGCTGGAT  
CTAATGGACATGGCTGTCTTAGACTTCCTCATGGGGAACATGGACAGACACCATTACGA  
GACGTTCAAGATTTTCGGCAACAACACGTTCCCCCTGCACTTGGACCACGGAAGAGGA  
TTCGGCAGACCCTTCCACGACGAGATCTCCATCCTTGCCCCCATCTTACAGTGTTCAT  
GATCAGGCAAACGACTCTAAGCACCCCTTCTAAAATTTACAAACGGACCAGTCCCCCTG  
AGCGAGGCATTGCGAAAAAGCATGGCCAAGGACCCAGTGGCCCCCGTTCTCTGGGAA  
CCCCATCTGGCGGCCCTCGACAGGAGGGTGCGCGTGATTCTTCAAGCGATCAGAGACT  
GCGTGAATCGTGAGGATTCGAGTCAGATCGTCCACGAGAAAACGGAGGATACCGGATC  
CTAGCCGTTCCCTTTCGATTCTCTTAGCGTGAATCGGAGAATTCTGATGAAACGTTCTGA  
TCAGACGAAGAGAAGAGGAA

>novel\_circ\_001879

ATTCGGATTACTGTTCCCTCGTGAAAGAGATCCCACCCTATCACGAGGGCAGAAGGTT  
GCTGGATCTAATGGACATGGCTGTCTTAGACTTCCTCATGGGGAACATGGACAGACAC  
CATTACGAGACGTTCAAGATTTTCGGCAACAACACGTTCCCCCTGCACTTGGACCACG  
GAAGAGGATTCGGCAGACCCTTCCACGACGAGATCTCCATCCTTGCCCCCATCTTACA  
GTGTTGCATGATCAGGCAAACGACTCTAAGCACCCCTTCTAAA

>novel\_circ\_001880

GTTTCCAAGGGAACAACAACTCTGCCCAATCACTTCTACTTCACCGATTTTCGAGAGG  
CATACGGCCGAGATCGCCGCGTTTCATCTGGACAGGCTGCTTGGATTTCAGGAGGGCGA  
TGCCGGTTACGGGGAGAACGTTGAACCTAACGACAGAGATTTATCAGATCGCCGACGG  
CGAACTGCTGAAGACGTTCTTCGTTCAGCCCCGCCGGTAATATCTGCTTCCACGGCAAG  
TGCAGTTATTACTGCGATACGGCGCACGCGATTTGCGGAAATCCGGACACCCTTGAAG  
GCAGTTTCGCCGCTTTCTTGCCGGATAAATCTTTCGTGCGGAGGAAGGCATGGAGACA  
CCCCTGGCGGAGGAGTTATCACAAGAGGAAGAAGGCCAGTGGGAGCACGATTTCGGA  
TACTGTTCCCTCGTGAAAGAGATCCCACCCTATCACGAGGGCAGAAGGTTGCTGGAT  
CTAATGGACATGGCTGTCTTAGACTTCCTCATGGGGAACATGGACAGACACCATTACGA  
GACGTTCAAGATTTTCGGCAACAACACGTTCCCCCTGCACTTGGACCACGGAAGAGGA  
TTCGGCAGACCCTTCCACGACGAGATCTCCATCCTTGCCCCCATCTTACAGTGTTCAT  
GATCAGGCAAACGACTCTAAGCACCCCTTCTAAA

>novel\_circ\_001881

GAAGAACAGTTCGACGTTGGAGAGATTCCATCTGCAAATCTCGAGGATAGAACTGTAT  
CCGGAGAGGTCGAAGTACGTGGACCAATTGTTGCACGAGATCGCGACGAGGCCTATAG  
TTCACGTCGTTCAAAAAGAGGGCGGCACCCAGCTGAAACTGCAGATAAATTATTCCAA  
CATGCAGGCGCTGTTCAAACCCATGAGGTTTCCAAGGGAACAACAACTCTGCCCAAT  
CACTTCTACTTCACCGATTTTCGAGAGGCATACGGCCGAGATCGCCGCGTTTCATCTGGA  
CAGGCTGCTTGGATTTCAGGAGGGCGATGCCGGTTACGGGGAGAACGTTGAACCTAAC  
GACAGAGATTTATCAGATCGCCGACGGCGAACTGCTGAAGACGTTCTTCGTTCAGCCCC  
GCCGGTAATATCTGCTTCCACGGCAAGTGCAGTTATTACTGCGATACGGCGCACGCGAT

TTGCGGAAATCCGGACACCCTTGAAGGCAGTTTCGCCGCTTTCTTGCCGGATAAATCTT  
TCGTCGCGAGGAAGGCATGGAGACACCCCTGGCGGAGGAGTTATCACAAGAGGAAGA  
AGGCCCAGTGGGAGCACGATTTCGGATTACTGTTCCCTCGTGAAAGAGATCCCAACCCTA  
TCACGAGGGCAGAAGGTTGCTGGATCTAATGGACATGGCTGTCTTAGACTTCCTCATG  
GGGAACATGGACAGACACCATTACGAGACGTTCAAGATTTTCGGCAACAACACGTTCC  
CCCTGCACTTGGACCACGGAAGAGGATTTCGGCAGACCCTTCCACGACGAGATCTCCAT  
CCTTGCCCCCATCTTACAGTGTTGCATGATCAGGCAAACGACTCTAAGCACCCCTTCTAA  
A

>novel\_circ\_001882

GTTTCCAAGGGAACAACAACTCTGCCCAATCACTTCTACTTCACCGATTTTCGAGAGG  
CATACGGCCGAGATCGCCGCGTTTCATCTGGACAGGCTGCTTGGATTCAGGAGGGCGA  
TGCCGGTTACGGGGAGAACGTTGAACCTAACGACAGAGATTTATCAGATCGCCGACGG  
CGAACTGCTGAAGACGTTCTTCGTCAGCCCCGCCGGTAATATCTGCTTCCACGGCAAG  
TGCAGTTATTACTGCGATACGGCGCACGCGATTTGCGGAAATCCGGACACCCTTGAAG  
GCAGTTTCGCCGCTTTCTTGCCGGATAAATCTTTCGTCGCGAGGAAGGCATGGAGACA  
CCCCTGGCGGAGGAGTTATCACAAGAGGAAGAAGGCCCAGTGGGAGCACG

>novel\_circ\_001883

TTCAAAAAGAGGGCGGCACCCAGCTGAAACTGCAGATAAATTATTCCAACATGCAGGC  
GCTGTTCAAACCCATGAGGTTTCCAAGGGAACAACAACTCTGCCCAATCACTTCTAC  
TTCACCGATTTTCGAGAGGCATACGGCCGAGATCGCCGCGTTTCATCTGGACAGGCTGC  
TTGGATTCAGGAGGGCGATGCCGGTTACGGGGAGAACGTTGAACCTAACGACAGAGA  
TTTATCAGATCGCCGACGGCGAACTGCTGAAGACGTTCTTCGTCAGCCCCGCCGGTAAT  
ATCTGCTTCCACGGCAAGTGCAGTTATTACTGCGATACGGCGCACGCGATTTGCGGAAA  
TCCGGACACCCTTGAAGGCAGTTTCGCCGCTTTCTTGCCGGATAAATCTTTCGTCGCGA  
GGAAGGCATGGAGACACCCCTGGCGGAGGAGTTATCACAAGAGGAAGAAGGCCCAGT  
GGGAGCACG

>novel\_circ\_001884

ATGGAAGCGAAGGGGGAGAGAAAAAGTAATTGCAAAGTGGCGATGATTCCCTACTAA  
CAGAGTGTGGAGAATTAACCGAGTTGTTGAAGTGAGAGCCGCATTAACGTGTTATTAA  
CGTCATGTAACCGACATCGCGAAAGTAAGAAGCATGGAGAAGGTATGCAGGCCTGCCT  
GGAGTAATCCTCGACCCACCAAG

>novel\_circ\_001885

GGACGAGGAATGGTGGGATTCCGGGAACGGAAGGGCGGCGGTGTGGATGCCGGAGG  
AAAGTGAGAGGAAACGAAGAAACGATGGCAGAAAACAGAACTTTGCTCTCCAACGG  
CCGTGAGTCATCGTCGCGTGGCCGCCTCCACCTTCGACTTCATTCATCCTGGGCGAAA  
AAAAGTCATCGTCGCTGTTTCGTGATTCAATCAACCAAAAAGTTGATTTCTTTCTTTCTT  
TTTTCTTTCTTTCTTTCTTTCTTTCTTTCTTTCTTTCTTTCTTTCTTTCTTTCTTTCT  
AACTGGAAGTGAAGAAACGTGGTACAACACGGACAAGTGACTTGAAAAAAAAGTC  
GGGGCGAGGTTTCGGTTTGGATTCGAGAGAAAAGGAAAGAAGAAAGGTTTCATTCGCAC  
CGGTGAAGCGAGTGGCATGGAGGAGCCACAGAAGCTGTTCCGTCTTCCCGGCACCAT

CGAGGAGGAGGAGGAGAAGGATAACGAGGACCGAAGGCGGCAACAGCTGCAGGAGA  
ATCCGAGCACGGCCGACTCTCCGTTGCTGGAGCAGAGGAACACGGGAACCTTGTCCA  
GCCTGCCCAGGTACGTGACCCTGGTCAGGGTCAGCACCCAGAGCAGCAGCATCGGTG  
GTGGCGTCGGTCGCCAGGATTCTACCAG

>novel\_circ\_001886

GAGTCGGTACCGAGCATGGCCAACGCGAAAGTTGCGCCGTCGAGCCGTGCTGAAGAA  
CGGGGACTGCAACGTCCTCCAGTCCCGTATCTCTCGGCGTTCCCTGCGCTTCTGCGA  
GACATCTTCACGACCCTGGTGGACACTCAATGGCGATGGATGTTGCTCTGCTTCAGCCT  
GAGCTTCGTCTCTCGTGGCTGGGCTTCGCCGTGATCTGGTGGCTGATCGCGTTCAGCC  
ACGGCGACTTCGAGGAGCGCCACCTGCCCCCTACCAGATCGAGAACAACCTGGACGC  
CGTGCGTGAACAACATATTCTCGTTCACGAGCTGCTTCCTGTTTCAGCATCGAGACCCAG  
CACACGATCGGTTACGGGAGCCGCGGCACGACCGAGGAATGCCCCGAGGCGATCTTC  
GTCATGTGCATCCAGAGCATCGTCGGGGTGATGATCCAGGCGTTCATGGTGGGAATAGT  
GTTTCGCCAAGATGAGCAGGCCGAAGCAGAGGACTCAAACGTTGCTGTTCTCGAGGAA  
CGCGGTCATCTGTCAGAGGGACGGTGAACGTGCTTGATGTTTCGGGTAGGCGACATG  
AGGAAGAGTCACATAATCGGGGCCGCGATCCGGGCTCAGTTGATAAGGTCGAGGACG  
ACGAAGGAGGGGGAGGTGTTGTCGCAGAATCAACAGGAGTTGGCGGTGGGGACGGA  
CGGGCAGAACGGGAACCTGTTCTTCATATGGCCGACAACGATCGTCCACAGGATAAAC  
GAGGAGTCCCCGTTCTACAACATGTCCGCGGAGGACATGCTGACGGAAAGGTTTCGAG  
ATCGTGGCCATCTCGAGGGGACGATAGAGTCGACCGGGCAAACGACCCAGGCGAGA  
TCGAGCTACCTGCCCCAGGAGATCCTGTGGGGTTACAGGTTTCGAGCCGATGGTCACGT  
ACTCGAAGGAGAGGCAGGGCTACGAGGTGGATTACTCGTTGTTCAACAGCACGACGC  
AGGTGGGCACCCCGCTGTGCTCGGGCAGGGAGCTGGCCGAATTTTACAAGGCTCAGG  
AGGAGCTTCGTCACGGGAACG

>novel\_circ\_001887

CCGGTGCGGTAGTGATCGTGGCCTCGAAGCGAGTCCTTTTACGGCGGGGACGAGCATC  
GAAAGCGGAGGAGAGCAGCCTCCCTCTCCCCCTCCCTCTGTCTTTCTCTTTCTTCCCC  
GACTTTGGCCACGCGCGCCTTTATCCACCGGTCCAAGACTGGAGAAGATCGCGAGAA  
GGAAGGTAGAAGAAGAGAGAAAAGAGAGAAGAAAAAGGAGAGATCGAAAGCTAGAC  
CAGTGTCCCAGTGCGCTCGAAGTTGGCATGGAGGGATAAAACACGGTGCAGAGAATT  
GTGAGAAGAGAAAAGGGGGAGAGAGAGAGAGGGAGGAGGAGGAGGAGGATTGG  
AAAAATTGGCGGTGGATGGATAGCGATAAATTCGGCATGAGGTAGAGGAGAATTTCA  
AGCTGGTTGGTCGGAGAGAGGAGCGATCGATCGTGGAGGGATAAGGGGGGAAGCTAA  
ATGCCAGTTAAAAGAAAGGCGAGGAAGGAGGGTTAGAGGTGGAAAAGTGGTCGGGG  
ATAGGAAGAGGCGGGTGGTGAGGAGGGAGAGGAATGGGTGCCGGGATGGGCAGGAG  
CGGCACGAGCGGCGGCTTCCTCGAGGCACTTCCCACGGGAACGCCGCTCCACGTGGC  
CATGCTGGGCCTCGACAGCGCGGGGAAAACCAACCGCGTTGTATCGGCTCAAGTTCGAC  
CAATACCTGAACACTGTGCCACTATCGGCTTCAACTGCGAGAGAATCCGTGGCGGCA  
TCGGGAAAAGCGAAAGGTGTGAATTTTCTCGTATGGGACGTGGGCGGGCAAGAGAAAT  
TACGGCCGTTATGGAAGTCTTACACCAGATGCACGGACGGTATTATCTTCGTGGTCGAC  
TCGTGCGATGCGGAACGGCTCGAGGAGGCCAAAATGGAGCTGACCAGAACGGCGAG  
GAGCCCGGATAACGCCGGTGTGCCATTCTGATCCTAGCCAACAAGCAGGATCTGCCA

G

>novel\_circ\_001888

AAAAAAAAATAAATTACGTGATTGGTTACGTGTTGTATCAAAAGACAAAGAAACCTATG  
AGTTAAGGTACTTCCAGATTAACAGTCAAGAAGATGATGATGAAGAAGATGCAGAATA  
AAATTTTAATTGTATGATGCAATTACAGAATTATCTGTACATATTTCTACTAATAAATAATA  
GGAAAAAA

>novel\_circ\_001889

CAAAGAAAAAAAAAAAAAGTTAAAGAGGGAAACGAATGAAAAATACGAGAGAGGATAA  
TGTCCGTGTATTAATGGAGGAAAACATGTATATCTACGTATATACGTGTATATGTACATAA  
ATTATTACGAATTATCGATGTAAGATTGAACTATACATACATACATATATAAATAATATAAC  
TTATAAA

>novel\_circ\_001891

AATGCGTTGAAGATCCGGCCGGTCGAGGAGAATCGAGATGTCCGCCGTAACCAGCCCG  
TATGGCCCCACGGAGATGCTTTCCGACTCGGTGTACAACCTACGCGACGACCCGGCGGG  
GGACCGGCGATCAGGACAGCGACTCCCAGTACGAGGGCCAGGCCCAGCTGCAGATCA  
CGAGCATCCAGAAGCCGCGCAACAAGCGCAAAAACTTCAAGCCGATAAGCAGCCGGA  
TGGTGGAGGTGTCCGATGAATCCGAGAAGGAGGACGACGAGCTGGACGGGGCAATGG  
AGGAGAGCTCGAGCGAGATACTCGAGTACGAGAGGAAGACGATGCTGTTGCCCGCGG  
AGGACAGGTCCAAGCAGAGGTTGAACAACAACGAGGTCAGCCCCATGGACCTGTCCG  
TCGCCACCAGGCCCCCGTCCTCCGAGGCCGACGACGATAGCGGCGACTCTCTCAGGCA  
CAAGTTCATCCTGGAGCAGCTCAGATCTCAGAACTCTACTCCCCTGGCACCGAGGCC  
AGGAGTCCGAACTCGGAATCGTCGGAGAAGAGTGGAGGAAGCGGTGTCCTGGACGC  
GGAATCGGGACGGCTGGACGACACCCCGTTTCGAGGACGAGCGGGGGCAGGACGGGG  
ACGGCGAGGCCGAGTGCAGGAGAGGAAACCGTTTCGAGGGGATGAGGGAGTACGCG  
GAGTCGACTATGCAGGAGTTGTTGGCTATCTACGGGCTGACGGGAGGAGAATTGGTCA  
AGTCTGTGAGCAGGCAGCTACCGCCGACCTTCTTGAATCCCCCGACTTCGGGCCATCA  
GCCTCACG

>novel\_circ\_001892

CGGAGATGCTTTCCGACTCGGTGTACAACCTACGCGACGACCCGGCGGGGGACCGGCG  
ATCAGGACAGCGACTCCCAGTACGAGGGCCAGGCCCAGCTGCAGATCACGAGCATCC  
AGAAGCCGCGCAACAAGCGCAAAAACTTCAAGCCGATAAGCAGCCGGATGGTGGAGG  
TGTCCGATGAATCCGAGAAGGAGGACGACGAGCTGGACGGGGCAATGGAGGAGAGCT  
CGAGCGAGATACTCGAGTACGAGAGGAAGACGATGCTGTTGCCCGCGGAGGACAGGT  
CCAAGCAGAGGTTGAACAACAACGAGGTCAGCCCCATGGACCTGTCCGTCGCCACCA  
GGCCCCCGTCCTCCGAGGCCGACGACGATAGCGGCGACTCTCTCAGGCACAAGTTCAT  
CCTGGAGCAGCTCAGATCTCAGAACTCTACTCCCCTGGCACCGAGGCCAGGAGTCCG  
AACTCGGAATCGTCGGAGAAGAGTGGAGGAAGCGGTGTCCTGGACGCGGACTCGGG  
ACGGCTGGACGACACCCCGTTTCGAGGACGAGCGGGGGCAGGACGGGGACGGCGAGG  
CCGAGTGCAGGAGAGGAAACCGTTTCGAGGGGATGAGGGAGTACGCGGAGTCGACTA  
TGCAGGAGTTGTTGGCTATCTACGGGCTGACGGGAGGAGAATTGGTCAAGTCTGTGAG



CAGGCAGCTACCGCCGACCTTCTTGAATCCCCCGACTTCGGGCCATCAGCCTCACG

>novel\_circ\_001893

GGAAGGTAAAAGTAAAAGAGGAAAAGGATGCTTCCTCGATGGCGCCAGGAAGCCCAC  
CGACGCCACCGCACACCCCCCAAAGCCCACCTCGACACAATCCACCCCCGGGTAACT  
GTCTCAGTCCTGTCAGACGTCGAACGCCAATTCTCCGAATCTGCAGCAACAGCAACAG  
CAGCACCAACAGCACCAACACCATCAACAGCAGCACCAGCAGCAGCAAGAGTCGAAT  
CAACAGCAGCAGCAGCAGCAGCAACAACAGCAGCAGCAACAGCAGCATCAGCATCAT  
CATCAATCCATTACGCGATGACCAACACACCCCTGAGCCAGATCTTGGTCCAGAATCC  
GGCCCTTGCTCAACTTCTGCAACAGAATCCCGCGATTCTGTGCGAGAATCCCCAGTTG  
GCGCAGTTGCTGCAGCAAAATCTTCAAGTTCAGATGGGCAGCGTCCTTTTCCAGAACG  
TGAGGAGGGAGGAACCTGAGGAATCGAGG

>novel\_circ\_001894

CATTATTGAGACAAAGCATGTCTCCGGTTGCGGACACCTTGATCGGTAGCTCGAAAAG  
CTCCGTGTCACAACCAATAATCGATTACTCCCGATACGTGAGGCGGTACACGTCGGGTC  
AAGAATGCGGTAGCTCGTATTGTAAGGAGCTCGGTTGCCGAGAGCATTTTCACTGTCTG  
GATTGCAGTGGTAGGGTCTTTGTGAAAAAGGAGGAAATGATCAGGCATTTCAAGTGGC  
ACAAAAAGAGGGACGAATCTTTGCAGCACGGCTTCATGAGGTATTGCCCGACGGATGA  
TTGCTCGGAGAGACATCCGGGGCCGTGCCTGCCCCACAATAGAAAACAGACGCACTAC  
CACTGTATCCACGAGAATTGCGATAAAGTTTACATATCGACGTGCGACGTGCAGATGCA  
CGCCAATTACCATCGCAAGGATTCGGCTATCATAAAGAGGGTTTCCAGAGATTCGAG  
CTACCGAGAGCTGTGCTACCGATCACTGTCCCTTCGTTGGCCAGCGGACCACGCACTT  
CCATTGCCGGCGACCAGGTTGCCGGTTCACCTTCAAGAACAAGGCTGACATGGACAA  
GCACAAATCGTACCACATCAAAGACGAGCAATTGTCCCGCGATGGGTTCAAGAAATTC  
ATGAAGTCCGAGGCATGTCCGTTGAGCAATGCCGTTTCTCGCGCGTGTGCAATCACAT  
ACACTGCATACGACCGCACTGTAGCTACGTTCTTCACTCGTCGGGCCAATTGTTCTCCC  
ATAAACGAAAACACGAGCGCCACGAGACCGAGTTGGCCTACAGAAAGTACAAGCAGA  
TCAACGCGGTTCGGCGGTATCCGGCCGCCAGGCTCCTGGCCACCGGACGATCTCACCAC  
GCAAAGTCTCTCCCTCAGCCTGAACGGCGAAAGTTTGAACGAGGACAGAGGCTCCCC  
CTCCTACTATTCCCTCGACGATTGTTTTCAGAGTGGCAGCGATCTAGCGATAGATCTAAC  
CGCGCCGACCACGACCACCGTCACCACGGCAAGCGGGAGTTCCACGGTGACCATGGA  
CCAACAGCAGCAGCAGCAGCAACAGCAACAGAGCGGCCAACAGCTCACCGCCATCG  
AATTGGCGTATCTGGTGCCCGGTAGCGCCGATTGCCCTGTACCTGGGCAGGGAACA  
CCATCACTGCGGGTTGGACCGTTGCGGCGCACCTCTCAAGGATCCTCGCGAGGTGAGG  
GAACATTTGAAGGAGCACGAGACCCAGGAGCGCATCACGGACGCCTTCTTCGAGGAG  
GGTGGATGCGACGACAGTTGCCCGTACGCCGACAAGGAGAAGCATTATCACTGCAACT  
GGGAGAATTGCCGGGAGGTGATCCTCTCCACGGACAAGCCGTTCCGCCGACTTCAGC  
ACTACAAGATACACGAGTACAGCCGACAGTTGAACCTGTCCTGCACCTCCCACGCCCT  
GTCCTCGGACGTGACGTTGACCCATCTGACCAACATCGACGCCATGTTCAAGCGGAAG  
AGGGGCAGGCCACCGAAGAACAGAGTGATCGAGATCTGGTCGGGTGGCGACCCGGCC  
ACCCACACCCACGACTCCCCCAAGCGATCTTACGAGTTTCAAGCTGCCGAAACCTC  
AAACCCCTAGTCTCGCGTCGAATCCTATGGCCGAGGATCGCGAGGGGAGCGTCTCGCC  
CTCGAACAGCTCGGCGAGCCCGACGGTTTCTCCACCTATAATCCCGACGGATGCCCA

>novel\_circ\_001896

```
>novel circ 001897
```

```
>novel circ 001898
```

GTAAGGCCGAGGGATCGAGGAGGAGGCTGCTGTTGGATCGCGCGTCGATAGGCGTCG  
AGGGACGAAAGGAGAAAAAGAAGGAAGAAGAAAAGGAAAGAAGTTGCGTCGTCAC  
GTCGAAGAAACGATCGGTGGAAGAAAGATACAACGCCCTGTGATTTTTTCGTACCCCT  
CTGATTTCGCGAGTCGGGAAGAGAATCGCGTGGACGAGGGGAAGAAATAGAAGGCGGCC

TAGTTATGTCGAGTGTGGAAGGCTGACCCCGAAGGAAAAAGGCGGAAGGGGAGGAG  
AATTGAAGATAGATGGGATGCCGGAGCAGTGAACCGAATGGAAGGATGTATCATCCGG  
CGTTGTGACTGCCTATGGATATATTCGGCCGTTGCAACGGCGGCGGTGGCGGAAGCAG  
CACGGTATCCGGAAGCGGCGCTGGCTCGGTGAGGGGGTCCGGCAACGAGTCCAGCTG  
TGGAACGGCGAGCGGTGCCAGCGAGAGCGGCGGAACGAGCGACAGGATGCAGTTGA  
CAGGGGCCTCGGCTCCCGGCGTCGCCGCCTCGCCGGAGTCGGGCGTTTCTCCTTTGAC  
CGACGCCTACACCAAGATGACCAGCGACATCCTCGCCGAGAGGACTCTCGGCGACTTT  
GTCAGCGAGCATCCCGGAGAAGTCTGTGCGGACAGGCTCCCCGCACCTGGTGTGCACC  
GTTTTACCGGCCCATTTGAGGTCGAACAAGACCCTCCCGGTCGCGTTCAAGGTGGTCG  
CTCTCGGCGAGGTGCGGGACGGCACGCTGGTCACCGTTTCGCGCGGGCAACGACGAGA  
ATTGCTGCGCCGAGTTGAGGAACTCGACCGCCCTCATGAAGAACCAGGTGGCCAAGT  
TCAACGATCTGAGGTTCTGTCGGGAGAAGCGGGAGAG

>novel\_circ\_001899

GTCATATCCATCGAGCCGAGATTCCTAAGGGATTTCTGCACGCCCCAGAATCTGGCCAC  
TTGGCTTCCGCTGGTAAAGGACACTCTGTTGCCCGTCTTCCTCGCGCTGTTTCGACAAAA  
TGTTCTGCCGTTACGTGGCCAAGGTCTACACGAAACAGGACCACGCGAGGAGGTTGT  
CTCACG

>novel\_circ\_001900

CCCCTGATAATGGTCCCCAGCGTTGAGGAAGATCGCGTTCGGCCTCTCCTTCAACAAC  
CGATTCACAGCCGTGGAAATCCTCGCTATTCCCCCACGCAGCTCGTCTCCTGCCCCCTC  
TTGACACGTTCCGGATCGTGGATTGGTTTGCTCGAACCTGGAAAAGAAGAGAATAGAA  
CACTTCTTGAAACTTGAAGAGAGAAAAATCAATGATCGTTCTCGATCGGATTTTTATTG  
TCGTCGAAATCGACGGACAGCGCGTGCAGGGAATGGAAATTTGTCAGAGCGTGCCG  
TCGGTTAACGAGAGTGTTGAGCAACGACGAGGAGAGGAAAAAAAAAAGGGAACACG  
GTGGAAGGAAAAGAAGGAGAAGACGATTGACCCGAATCATCGCGCCCCTGACCCTGA  
GATTCGCTTGGCAGGACCTTGGAATCGAATGGCGCATGCCGCGCTTCCGATTTCGATT  
GTTCTGTTTACGTAACCGATCGTTACGTCTCTCTCTCTCTTTCTCTTTTTTTTACGATTG  
ATTCCTCGAATCGAATCCAGTTGAAAATCTGAAAATCTCTCGCGAATTCTCGAGATCA  
ACGCTAGGATCTGTCGGATTATTTATTCATGAAAAATTATTAATTAATTTATAATTTATTA  
GAATTAATTAAGAAAGGAAGGAAAAAAAAAACACGTGACGATTCCGTTCAAAGATAATT  
TCAATAATTCGCAATAATAATTTGAAAGATAAAGAGATAATTTCTTTCACTTTCACTCA  
CTTGAATTGATCGATGAGAAGATAGATTGAAAATTAATCGGATCGTTTTCGATTGGTTAT  
CGATCGATCGCGCGAATGTATTATAAATTAATTAATAAAGTCGCTGTTTTATTTATTAGA  
TTAGATCGCTTATTTTATTAGAAGAGTTTCTTTTTCGAAAATGTTATAGAAGAAATTTCT  
AAAAGATAGAATTTTAATTTGAGAGAATCAATCAATTCAACATTTCTTTGAATATCGAT  
TAATAAGATTATTCATAAGATTATTTATTAATTCGTAAAAAAAAAAGATTAATCTTCCAT  
GCGTAGCAAGAATTTATCGAATTTATGAATTTATCGAATATTTCCAGAACGATCGATACG  
ATATTTTCGAGCCTCGTCAATATATTTTATTCCTTTTTTAATTTTCGATCATGAAATAGAAG  
AATATTTTATATCTTCGAACTCGAAGACATTTCTACAATTTTTTTAAATAAATCTTCAAT  
TCTTTTCAATTCATGCACCGCTATAATAATAACGTCTTGCAATTCGCGCAACCAATTTAA  
CGATCGATGGATCAATCCCCTTACTTCATCAATCGCTTTCTCTTAACGAGAAAGAAGTTT  
ACAATCCGTCCAACGATTTAGATGGACTGGAAAGATACGCTCGATACAGCATTATTA

CGGTAAACATCATTAAAGGTTAAACGTTTGAGAGGATCGATGAATCTCGAACATTTTT  
CTCACCTCGCGTGGAATCGTTCAGATGTATCACCGACAACCTCGAACAAATCCGATCGT  
CCCGGATAACGCGCTCCTCTTCCGGTGGATCCGTGGCATATCGGGGCGAGGAGCAACA  
AGGGCAACAAGAGCCGATAAATTCGGCCACCGTGGTTGCAATTCATCCGAAA

>novel\_circ\_001901

ATTCGAGCAGACGTCGAAATTGTCGAGCGTTTGCTCGGCGAAAGAGGCGAAGGAGAA  
GAAATGCTACGGGGGATTGCCAGGTTGGCGACACTGATCCGGCAAGCGCGAAAATCG  
TCTGTCCCCTGCCTCTTCTTAAACGCTGGGGACACGTATCAAGGATCCATCTGGTACAA  
CGTGTAACAATGGAAGATAGTTGCCAAGTTGATGAATCTTTTGGCTCCGAACGCCACG  
AGCTTAGGGAATCACGAGTTCGACGATGGCGTGGACGGTCTGATACCGTTCATCCAGA  
ACGCCACGTTCCCAATTGTCACTTCGAATCTAAATTTGAGCAAACAGCCGAACCTTGGC  
CGCCACCAAGCTGTTGAACAGCACGATATTGACCGTGAACGGGGTAAAGATCGGTATA  
ATCGGTTATCTGACCCCTGACACGAGGATAATCTCTAGAACGGACAACGTGATCTTCTT  
GGACGAGGTGCAGAGCATACGAAGAGAGGCGAAGGAGTTGAAGCACAAGGGTGTTA  
ATGTATTGATCGCCGTCGGCCATTCCGGCTTCAAAACGGATAAAAGGATCGCCCCGAGA  
GGTGGAGGATATCGATATAGTGATCGGGGGGCACACCAACACTTTTCTCTACAACGGG  
AAACAACCGGATAGGGAGATACCGGAAGGGCTTTATCCGACGGAAGTAACGCAGAAA  
AGCGGGAGGAAAGTGTACGTGGTTCAAGCTTTCGCTTACACCAAATATCTTGGCAATTT  
TACCGTAACATTCAACGATAAGGGAGAAGTAAGCAATATCAGTGGAAATCCTATTCTCG  
TGGACAGTAGCATAGAGCAG

>novel\_circ\_001902

ACTCGGGTGCTAGTATGTGTTACGGCTCAGTCCTTCGAGTAGCGGTTACAAATCGCAA  
AGTCAGCGCAGCGATGCCACGATATCACCGTCTCCGTCGCCATCCCCCGTGGCAACGA  
TGACCTGCAGTCATACCAAGTATCTAGTCAGGATCTCGCCTCCCCGGAATCGAATAAT  
CAGACGGTGATGTGGGCGGTCACGAGTATATCGAGCGTGCCGCCTGGTAGCATAATTAT  
TAACCCGCAAACGAATCAACCGTACACGAATCCGGATGGTTTCGATTTATCGCTTCGATC  
CGGATAATCCACCCAAGTTTTATACACCTTCGTTGTCTCACGAGAACGAGAGAAACGA  
GAACGTGTGCCCCGGAAGATCGTAGAAACGTCCGAGCCATCCAAAGTAACGGTTAG  
AAACGAGAATAGAAAGAGATCGCAATCCAGCAAGCACAACGGTGGCAACAATGGAAC  
GACAGTGACCCACGTGACCAACTCGGCAACGTGCGCCGAGTTTGCCGTTACCCCCACC  
ACCTCGAGATAATCCAGGACCATTGCGACAGCAACAGCAACAGCCGCAGCCGCAGCA  
GCAGCAGCAACAACTCTAGTCAAATCGTCGTCGACGGTGCAAACCTTGTAATCACAAT  
CAAGCAGCTCAAACATACGCGACCTACGTACCTACCTCAGAACCGTTCAACCAGGGTG  
TCTATCCACCGCCCCATGTGGGACAACAGACTGTGATGATGGCCCCCATCCGAGTCA  
GAGTCAGACGAATGTTCAAAACAATGGACAGAACGATGTGTTTAACCAGAATTCGGTT  
TACGCGAATTATGCACCAGTACCTGTACAGCAAGGACCAGTATCGCAGACAACGGAGA  
TAACCGAATTGTCCGGTTATTTTATGGGCATGAGCATCTACGATCAACGTGTAACCTGGTG  
ATAATCATTCAACGCCACCGCACTCTTATCCTCAACCGCAGCAATCCACCGCGAATCAA  
ACGAATCTGCAAAATGTGCAGACGATGCCGCAAAATTATTGGCAACCACCACCTAATT  
CCGTACTGGTATGAATTATTATATTACGTTATTTTATATATATATTTTTTCAATATAATTTCAA  
TTCTTTCATTATTTTTGCATTATTTTCCAGCCGCAACAAACAATGTAACCTCGTACCTCCG  
CCTGGGGCGGCACCTTCGGTTAGCCAAGGTCCAGCCGACAGACAACAGTTGCACCAG

CAACAAAGATTTCCAACAAATTATTCTTTCAATGCACAAACTATGACTCCTCCGAGCCA  
ATCGAATTGTAGGTAGATTTTCTAAGATTTTCTAAATTATTATTATCGTTACTCGCGTCT  
CGCGTGTTTCTAAATTACGTGGTAAATATTATTGATTTTCCATTCTTTTTTCTTTTCAGCT  
AATTACGTGGGTACTTATCCAGTCCCTTACAACCTCGATGCCCGCTGTGACGCCAGCACC  
AGGGGACTACACGTATCAGCCACCTGTTACATGGTCCCCACGTACTATCCACCGAATC  
AAACGACCATTCAACCGCCACCTGTCATGTACAGAGTACCAACACCACCAATACTCC  
AACTTCTAACCAGGTAAAAATAGCCATTGCTTTAAACGGCGGTGTATTAATTTTAAATA  
TTCATTGCCAGATTAGATAAAAAGTATAAATATCCTTGTAATCGATCAATAATATAATACAT  
AGATGCCTGGGGTGCCATTGATGTATGTCAACTCTGGCAGCTATCCACCACCAACGATG  
GTATCCAATGGGACTTTTGGTCATCAGGTTGGACACAATGGCACGTCTCCAGCGCCCCC  
TGGAACCTACATGACACCAGCGCTGGTTCCCAATCTCGTGTTTAGGCCAAAATGTTCCCG  
TAAGTTGGTACTATTGCAAGAGAGAAATGGAGAAAAATTCAACTATTATTATCATATTAT  
TATTATTATTCAGGTCGTTGCTGGTGTTTCGAGCTTCAACGCCAGGTAATTCTCAGAAAA  
CTAGCAGGTCGCCGACTCCAGCACACGAGTTGTTTCGGAAGTGGGAGCGGGGACAGAA  
GCGCACAACCCCAACCACGCTACCCACTGCCAATGTATCAGGGTGTCCATATTGTCCAA  
GGTACGATATATATATATATAGAAATTTAGAAATTTTTTATGGGATTTCGTTATCTTTGAT  
ATTCCATATTCGCAGGAGATATGAGATTGATGCATCCCGCAGTGCCAGCTAATCCGCGAT  
TGCAGTACGCGCCAGTACCATCACCACTGTTGTTCAAGGTTGTCCACGACCGTATCGA  
CCACCTTCTTATTCGTGGAACACCTCAGGCGCTGGTACACCCACATCGTTTCGATGGGAG  
AAATCAGAAAATTCGTAAACAGAGGTGATTTTCAGATAGCATTGCTTTGCGCGATATACG  
GTAAAATGGAAAAAGAGAGAGAGAGAGCGGTGACGTTAATTTTCTTTTCATTCCAG  
GTCCAAAGTAACACCGTTGCCGTTAACAGGCGGTTCGGCCCAATCTTTATCAGACTCCTT  
CCATGCCGTCGCTCTCGTCTAACGTACCGAAAGATATCAGAGAAG

>novel\_circ\_001903

ATAGTAGTACGGAATTGTATACGGACAGCACAGGGATAGATCTGGAACATTTTCATCGCC  
GAGACCATAAATCGTAATCAGAAGGATCGGACGGTGCTGTTGAAAATCGAGAAAGATC  
TGATAGAGTTCGCCAGGGACAAGCAGAAAGTCTGTACAAAGTTTCCCAACATGTCCTC  
GTACAACAGGATGTTGGTGCACCGCGTGGCCGCGTACTTCGGTATGGAGCACAACGTG  
GACCAATCTGGTTCGAGCGTGATAGTGACGAGGACGAAGAACGTGCGAATACCGAAC  
ACCCGTTTCAAGGAGCACATAAGGGACGACTTGATACTGTCCGAGGAACCGAGGAGA  
AGCATACTGAAGAGGGACTCGAACTCGTTCGAGGACAGTTTCAACTTCAAATCGCCGG  
ATAGATTGTGCGGCGATTATTGCCGGCAGAGCAAGAGTTTCGAGGAGAGGGAGGAGG  
AGTACGAGCGCGCGAGGCGGAGGATATTCAAGGACAGCAGCGGGGAGAGCAGCGAG  
GTTGCGTCCTGGCCTTACTGGTCCTCCTCGGAAAGCTCCGACGCGTCTGCGAGGTATC  
GTTTGTTACACCCGTCGGATCACACGATCATCAGGTGAATATCCTGCCGAATCAAAGTT  
AGCTATTATTAAACGTGTGCGAGTAATAACAGCGAGATCATATTACCTATACTTATATATATA  
TATATATGTACATGTATATATATATGATAGGCAAACGAAGCTGTTGAAAGGAGAATCGTT  
AGATGGAAGGGAATCCTGTGCGGGTTCGGTACTGAGACCATCCGTTTCCAAGTCCTTT  
AGCTTCGGTGGTTATACCAGGGGAATGCTTTCTAGAGGGGACAGTGTTACATCCACTCA  
TAGCGCGGGAGCTCGTCTTATGAAGCAAG

>novel\_circ\_001904

ATAGTAGTACGGAATTGTATACGGACAGCACAGGGATAGATCTGGAACATTTTCATCGCC

GAGACCATAAATCGTAATCAGAAGGATCGGACGGTGCTGTTGAAAATCGAGAAAGATC  
TGATAGAGTTCGCCAGGGACAAGCAGAAAGTCTGTCACAAGTTTCCCAACATGTCCTC  
GTACAACAGGATGTTGGTGCACCGCGTGGCCGCGTACTTCGGTATGGAGCACAACGTG  
GACCAATCTGGTTCGAGCGTGATAGTGACGAGGACGAAGAACGTGCGAATACCGAAC  
ACCCGTTTCAAGGAGCACATAAGGGACGACTTGATACTGTCCGAGGAACCGAGGAGA  
AGCATACTGAAGAGGGACTCGAACTCGTTCGAGGACAGTTTCAACTTCAAATCGCCGG  
ATAGATTGTCGGGCGATTATTGCCGGCAGAGCAAGAGTTTCGAGGAGAGGGGAGGAGG  
AGTACGAGCGCGCGAGGCGGAGGATATTCAAGGACAGCAGCGGGGAGAGCAGCGAG  
GTTGCGTCCTGGCCTTACTGGTCCTCCTCGGAAAGCTCCGACGCGTCTGCGAGGTATC  
GTTTGTTACACCCGTCGGATCACACGATCATCAG

>novel\_circ\_001906

AGTGACGATGTTGGAAGGTGGACGTGCAGTGATTTGGCTCCTTGTATCAGCCCCACG  
AGCTGCACGCCACCCGAAAGATTACGTACTAACCCAGTTGCACCTGTTTGAACCCAC  
CAGTTGCAGAGTCTGCACCGTAACCCCATGACGCATTTAACACATGGCCCCGCCTGGAG  
AGTAAAGTGTATTACGCTCACGATCTTACGTCTCTCTCTCTCTCTCTCTCTCTCTCT  
TTCTCTCTTTCTCTCTGCTCCCCTTGGCTTCTCCTTTCAAATCTTGATTGTTACGCAGA  
CGAATTCTTTCCAAGGAATTAATCCGTTTCATCTTGCATACATTGCCATACATTCCGATC  
AAGGGAAATTTTATATTGGAAATTCTGTTTTTTTTTTCTTCTTCTTCTTTTCTCTCCAAA  
AATCCGGGCATGTCAAACGAATACGCGAAGGGAATACGCAAGTGAGTGGTGGGTTTTG  
TTTGAGTACCAAGTATAGTGGTGCATAAAGGCAGCAGGTCGCACAGCCGACCTGACA  
GTCCACCGGTGGTGGTGCAGGAGGTATGCCCACGCTGCCGTCCTCCAGGCAAGGCTT  
CGTCGCGAGTGGCTCGAACGCGTTCGTATCAGAACAGCACGGAGCCGGATATGTTGGAC  
GGGAATGCCAATCCGAATGTCGTCTCCGGCTCCTCTCCCGCGTCGAACTCGCACCATC  
GTGGCGGCGCGCCCTCCTGCCCTCCCCCGACAACAAATCGGACGCAGAGAGCAAAA  
ACTTTCGCAACAGG

>novel\_circ\_001907

CTCAAGCTGGTGCCGTCGATGAAGAAACCTTCCTTACAACATTCTGAAGATGTGCCATC  
CGTAAATTTATTTTCCGCAAAAGATCTTGAAGAGCAAATGAAAATTATAAAAGATAATG  
TTGGCGATGATAAAAAGGATTGGAACAAAGGACGGAAAGTATGAAAAAATTAAGAG  
CAATCATTATCGCAGGCGGTACGAATTACGAAAACCTTTTAGAAAATTTGAAGAATGTT  
CAAAGACCTTTTGAGGTTGCTTGCACGGATCTTAGATCGCAAGTAGTGAGGGAGGCGT  
GCATTACTTTAGCATATCTTAGTCAACAGTTAAAAAATAAGTTTGCCAGCTTTGGAGAA  
GCGGTCTTACTCACCTTAATGAATCTCATACAAAATAGTGCCAAGGTTGTGGCAACAGC  
TGGTGCCGTAGCAGTAAGGTTTATTCTTCAAAATACACATTGCAGTCGTTTTGTGCCAA  
TTATCACGTCGTGCTTAAGTCACAAGAGTAAAGACATACGTCGGGCTTCATGCGAATAT  
CTAAATCTAATTTTACAAATATGGCCTACTCAAATATTACAAAAACACGTGACTACGTTG  
CAAGACACGATCAAGAAAGGTATTGCAGATTCAGATTCGGAAGCGAGAGCTTTTGCTA  
GGAAATCGTATTGGGCGTTCAAAGATCATTTCCCTGAACAAGCAGAAGCGTTGCTCAA  
TAGCCTTGACACTGCATACAAACGTTTCGTTGATGTCTCTCAGCAACAGCGGTAGCATT  
ACAGTTTAAATGTAGTTACGAGATCGGCGAGCGTTAGTCCCCGAACATCGAGACCAAGT  
CATGAGCGTTACAGGTAGTACGGAAAATTTGCATCAAACCTTCGGGTCAACCACATGGC  
CCGCTCAGACGAACGCCGTCTTGGCCACGGTCATATCGTCAATCTGGTATCCCAAGTCCT

TCAAAGACCCACTGATAGCCATTATCGTGGAAC TTCGAGTGTTAGGTCGACTAGTGCGA  
TAGATTTGCAAGCCGCGCAAAGAGCTAAAGCTAGAATGATGTATGCGAACATGAGTAG  
ACAGAAAGCATCGCTTCCACGTCCTAGCAAATCACCAGACACA ACTGCTGTTGCTAGT  
CCAGAAAGAACGGCAAGAACAAGAACTCGAATGTCTGGAGTGTCGCAATCTCAGCCT  
AGCAGTAGATCAGGATCGCCATCGTCAAGACTGAGTTATGCAACTTATAATCGTGAAGG  
AGAATCATTAATTGCAAGACCTAGACGGTTATCTGGACATGGAATCAGAAGTACCGGTA  
ATAGTCGTGAGCCAAGCCCACAAAGGTTTGG AATGGACAGAAGTTTTGCAAGCAAAAT  
ACGGGGAAGAAGTTTACATATGTCTCCAACGGATAGACCTCAATCCAGACCAGTCATG  
GCACAAAAGATGTTGCAACAATCACGCGAAGCAGAATCAGCATTGGCGGATGCGCTTA  
CATTTGAAAATATTGATAATTATACAAGAACACCGAGAGGAAAAGGTGATCACAGTGAT  
GACAGTGAACTAGCAGCATATGTTCTGAACGAAGTATGGACAGTTTTAGACGACCAA  
ACGAT

>novel\_circ\_001908

GTCGTCCAGAATGGTTTAGAAATCCTCACGTTTCTAGCGGATCGAATGGGTCACGACTT  
CAAACCTTATATTTCCACTATTATTCAACCAACAATAGATCGACTGGGTGACAGCAAAG  
ATGCGACGCGAGAAAAAGCGCAGCTAGTGCTTCTTAAAATAATAGAAAAAGGATGTAT  
GACTCCTCAGCAACTTTTGGATAGACTGCGGCCGGCCTTTAATCATAAGAATGCAAAAT  
TACGGGAAGAAGCTCTTATTTTGTTAACAACAACGTTGAACGAGCACGGCGCTGATGA  
AATGATGTTGT CAGGAGTGATTCCAAGTATCGTAA AATTATTATCAGATCCATCTGAAAA  
AGTGCGAGAACTGCTTTGAACACATTAGCGGATATCTACAGACACGTTGGCGAGAGA  
TTACGCGTGGATTTACAGAGAAAGCACAATGTACCGCAAGCTAAATTACTGTTGTTGAT  
AGAGAAATTCGATCAATTGAAAGCGGCCGGCGACCTGCTGCCTCTAGCAATGTCCCTCG  
GATG

>novel\_circ\_001909

GCCCGTCTGATCCGACGTCCAAGGGGTCCACTCGTCTCAGTAGTAACTGAATTTTCATG  
GTTGCTGATTGTTCTGCTGGTTGACCACGTGCTGGAGAGTGAAACTCAAGGCCCGAGG  
ATCACCGTGAAGCCTCAAGGCTTGTTCCAATCGTTGCTCTTGCAATCGCAACGCTTCCC  
CTGTGAACCGTGATGAATTTCTTTGAAATGAAATCGTTCCAATACTCTCTTCCCTGCTGC  
TTCGATCGAACGAACGACGACAACAACGATAACAATAATCGACGAAAGATGAACG  
ACGGAGAGAAAGACTTACCAAGGTCAGGCGGTAAGGTGTCTTGTTGAGACATCTGTT  
GGTTCGTGTGGTGTCCAGGCATGCCAGAGGTGCTGCCTCCGTTATGCTGGCCCAAATG  
ATGTCTCATGTCCCCACCGACCGCGGA ACTGGCAGCCGCCGCTGCTGCTTGC GACACC  
TGACGAGCGAAAGAGCGTGTCATACAACGTGTAACGGAGATATATTAAG

>novel\_circ\_001910

TGCAGAGCAAAGTGAGATGTTCCGAGCAGTGGATGGAAGTCGACATCGTAAGGAGCA  
GCCCACAAGCGAGGATATATCTGCAACAAATGAAAGACTTTCAGACGAAGCTTGCAA  
ACCTCGGCTTAGCAACGGTGTCGCCACGTTCCGATTACCTCTCCTAGAAGAGGACATG  
TTGCGATGCGGCATCACGAGGGTCGTTAACAAAGTCACGGGTCAGAAGGTGTACTTTC  
ATCGGATAATAGTGGAGGAGCTCGCGGATTCCAGCAAGCACACGTTACCGTAAAATG  
TGTTATCACCGAGGTGTTGTGAAACCTGGAATCTCGATCGCAGCCAATCACACCGTG  
GTTGCGAGGAGCGTTCTACCAGCAGGTTTCCAGGAACCCGA

>novel\_circ\_001911

GAACGGATCGGAGAAGATAGGAGGGAGAGGAACTTGTGGTAGATAGAAAAGGAGAGA  
TTGCGCGTACCGGTGAACGAAATGGAAGACGAGGACTTTGGCTTCGCTTCGAAAAGG  
GCTGATTCTAAGGAAACGATGAAAAGTGATAAGGATAGCTGCCCCCGATCGTCGGCG  
ATAATTGCTCGGGAGAGAAGACGAGGGAAACGATCGGTGGTGGTGGGTATAGATCAGT  
GATGACAGCGCCGTTATTCGGGGCGACCGAGGCCGGAACGCCGTCCCTGAGCGGGC  
AGCGACCGCCTCTTCATCCTCTCCGGCTTCCTCAGTCGTTTCCAACCCGCCGAACATAC  
CGAACGTAGTCGAGTATCATCTGAAAGTGAAGCCTGGCCAAACGCGGAGAATTAGCAC  
CACTCGACTCGATAATAGTAGC

>novel\_circ\_001912

GAATCCTGCTGGCAAACGCGATCTCGGCCGAACGTAAGGCAACCAGGCCGAAATTCA  
AGATCGCCACCACGTTCGACGACCACGACAACGACCACCACAGAGGAGAGCCAGAGG  
AGCGAGAACGAGGATGTTGAGGCGACCACCACCGCAACCGTGGCGGGCTGGCGGGGA  
GGCGAACGCGACCAGCGGCCACGTCCTCACAGGTATCCCGCAGATCGACTACATCTGG  
GACCCGAATTTGCCCCGCGAGTTGAACGGCTACAACCTGAGCGATTACCCGTTCTACA  
ACAGCATACCCGAGGACATCGACTTCAAATGCGACGGCCTCCACGATGGATTTTACGC  
GAGCGTGCCGCACAAATGCCAG

>novel\_circ\_001913

GAAATGTCACAAATCAGACGAAACAATGCGATACCCAAAAGATGGAGAATCAATGCGA  
TGAAAACGAGAGATGCTTTCAAATTCGAAAGGGGAAAAAGCATATTGCAAATGCAA  
GATAGGTTACGATCTGGAGAAAGGCCGATGCGTCCAGGTTACGATTACCACGGTTGCC  
AGTGTAACCTGATCAACCAAACGTCACGGCCAATTCAGCAGGTAGTTCTGTAGCCGCTG  
GCTTGTTAATACCAACTTTTCTCGTAGTAATGAGCGTATTACTGTATTTTGTGCGCAGGC  
GATATAAATGGTTGCAACGAGTTCGACAGCTTCGTCCAAACCATTATGGTAATGTCCTA  
GTCACAAGAGACGACGATGACGATGACGATCCACCTATAGC

>novel\_circ\_001914

ATTTTCCCGCAGGAAATGTCACAAATCAGACGAAACAATGCGATACCCAAAAGATGGA  
GAATCAATGCGATGAAAACGAGAGATGCTTTCAAATTCGAAAGGGGAAAAAGCATAT  
TGCAAATGCAAGATAGGTTACGATCTGGAGAAAGGCCGATGCGTCCAGGTTACGATTA  
CCACGGTTGCCAGTGTAACCTGATCAACCAAACGTCACGGCCAATTCAGCAGGTAGTTC  
TGTAGCCGCTGGCTTGTTAATACCAACTTTTCTCGTAGTAATGAGCGTATTACTGTATTT  
TGTCGCGAGGCGATATAAATGGTTGCAACGAGTTCGACAGCTTCGTCCAAACCATTATG  
GTAATGTCCTAGTCACAAGAGACGACGATGACGATGACGATCCACCTATAGC

>novel\_circ\_001915

GCGAGGCGGCGTCCGCGAGAGATTCGTCTGTCGACGAAACGAAGGAGAGGAAAAAAG  
AAGAAAGAGAATCGAAGAGAACGAGGAGGAAAAGGAGAGGAAATGCGAGAGATCTC  
GGCTGTTTCGTTGAGGGCGAAACGGCGAAGAGCAGCTTTGTGCAGCTTTGCGGAGGAA  
GAGGGGGGGCGGGGGGGGAAAAAGGAAAAAGTCAAAAACGCAGTTTGTACGCAGGCA  
TCGGGAGCGGTACTTCCGGTAGAAATAAAATCGAGCCGTGCGGTAGATGCAGCCGCGT



CCACGTGGGCCGCTCGTTCCGTGGAAGCGAACAGGGGGCCAAGCGCGGCAACGAGAC  
ACGTAACGGCGACGAGATCGTTTGGACGGGCCTAATCGCGGTTTCATGGTATAGGAGGA  
ATCCGATCGTTGCTTTTCGGGGCGGAGAGGGGAGGGGAGGAGCGTGGGGGAAGAGGTGA  
GTGAGAGCGAGGAAGGGGGCGGGGGGAGGAGAGAGACGCGTCGCTCCGCGCGTGG  
ATCGGCGCGGGCGTGTGGAGGTTGGTTCGCGGGGAGGGCGCGAGGAAGGGGGCGGT  
TGGAAGGGTTCCGCGACCTGGAGCAGGAGCAGGGGGAGGAGGGGGAGGAGGGAGA  
GGCTAGGACGAGAGGGTGGTTGCGCGTCGTGGTTCGCGTGACGCGCGAGGAAAGTGCC  
GGGGGACGGGCGGAGGAGGAGGAGGAGGAGGAGGAGGAGGCATGAGGAGGAGAGAGT  
GACGACGCTGCCGGTGCTGCAGCCTCGCACGGATCGTGAGAGGACCGGCGGCCCCAC  
GGTGGGGCTGCGATAAGAATGGCCCCCTTCAATATGGCGGGCGTAGCAGGCCTTCTAG  
CCACCTGCGCCGCCGCTGCTGCTTCCGCTGCTTACCTTCTGCCGTTGCTGCTGTTGCTG  
ATCTGCCCCGCGAGGGACCCACGCGGACCCAG

>novel\_circ\_001916

TGGGTGGAAGAGTCGTTACCAACTTCGACAAGGGCATCAATTGGCGGAGTTACGTTG  
TCTGCGACGTTCGCGTACAACAACGTGAACAATTGGCTGTGGACCCCGTTCATAGAGAG  
GGGACCGGCGAACC GCATGTACATAGAGATCAAATTCACGACTCGCGACTGCTCCCTG  
TTCCCAGGAAACGCGCTCAGTTGCAAAGAACTTTCAGCCTACTTTACTACGAGTTTCG  
ACGTGGCCACCAAGGAGCCGCCACCGTGGGAAACGGACAGTTACAAGTTGATCG

>novel\_circ\_001917

TGGGTGGAAGAGTCGTTACCAACTTCGACAAGGGCATCAATTGGCGGAGTTACGTTG  
TCTGCGACGTTCGCGTACAACAACGTGAACAATTGGCTGTGGACCCCGTTCATAGAGAG  
GGGACCGGCGAACC GCATGTACATAGAGATCAAATTCACGACTCGCGACTGCTCCCTG  
TTCCCAGGAAACGCGCTCAGTTGCAAAGAACTTTCAGCCTACTTTACTACGAGTTTCG  
ACGTGGCCACCAAGGAGCCGCCACCGTGGGAAACGGACAGTTACAAGTTGATCGGGC  
GCATAGCCGCTGGGGAGGGAAGGTTCAACACGAACACCGAGGTGGTGATAAACACGG  
AGGTGAAATCCATCCCCGTGACGAAGAAGGGAGTCTACTTCGCGTTTCAGGGACCAGG  
GCGCTTGCATCTCGATCCTTGCCATCAAGGTTTATTACATCAGTTGCCCGGAGATTTCCG  
TCAACTTCGCCCCTTCCCTGCCACGCCGACCGGCCGCGAGGTGGCGCTGATCGAGCA  
AACGATCGGCACCTGCGTGGCGAACGCCGTCGTGATCGAGCAGCCCACCTTCCTCTGC  
AAGGGGGACGGGAAATGGTACTTACCGAGCGGCGGGTGCCACTGCAAACCGGGATAT  
CAGGCCGACGTGGAGAAGCAGGAGTGCACCGAGTGCCCGATCGGTAAATTCAAACAC  
GAGGCGGGGTCGCACAGCTGCGAGGCCTGCCCGGCCACAGCAAATCCTCCGATTAC  
GGATTACCGAGTGCCGTTGCGATCCCGGCTACTTCAGGGCAGAGAAGGATCCCAAGA  
AAATGCCCTGCACCCAGCCACCGTCGGCGCCGCAAAATCTGACGGTGA ACTTCGTGCA  
CCAGTCCACCGTGTTCTGTCTGGAACGCGCCGCACATGCTCGGCGGGAGGACAGA  
CACGACTTATAGGGTGGTCTGCGACGCGTGACGATGGGTGTCAAATACATTCCCAAC  
ACCGAGGTTTTCAACGACACGAAGATTACGATAACTGGATTGAACGCGGTCACCACTT  
ATCGATTCCAAGTGTTTCGCCGAGAACGGGGTCTCGGCGTTGGCCGGCAAGTCGGAATA  
CGTGGAACATCACCGTGACCACGGATGCGAGCGTGCCGAGTTTG

>novel\_circ\_001918

TGGGTGGAAGAGTCGTTACCAACTTCGACAAGGGCATCAATTGGCGGAGTTACGTTG

TCTGCGACGTTCGCGTACAACAACGTGAACAATTGGCTGTGGACCCCGTTCATAGAGAG  
GGGACCGGCGAACCGCATGTACATAGAGATCAAATTCACGACTCGCGACTGCTCCCTG  
TTCCCAGGAAACGCGCTCAGTTGCAAAGAACTTTTCAGCCTACTTTACTACGAGTTTCG  
ACGTGGCCACCAAGGAGCCGCCACCGTGCGGAAACGGACAGTTACAAGTTGATCGGGC  
GCATAGCCGCTGGGGAGGGAAGGTTCAACACGAACACCGAGGTGGTGATAAACACGG  
AGGTGAAATCCATCCCCGTGACGAAGAAGGGAGTCTACTTCGCGTTTCAGGGACCAGG  
GCGCTTGTCATCTCGATCCTTGCCATCAAGGTTTATTACATCAGTTGCCCGGAGATTTCCG  
TCAACTTCGCCCCTTCCCTGCCACGCCGACCGGCCGCGAGGTGGCGCTGATCGAGCA  
AACGATCGGCACCTGCGTGGCGAACGCCGTCGTGATCGAGCAGCCCACCTTCCTCTGC  
AAGGGGGACGGGAAATGGTACTTACCGAGCGGGCGGGTGCCACTGCAAACCGGGATAT  
CAGGCCGACGTGGAGAAGCAGGAGTGCACCGAGTGCCCGATCGGTAAATTCAAACAC  
GAGGCGGGGTCGCACAGCTGCGAGGCCTGCCCGGCCACAGCAAATCCTCCGATTAC  
GGATTACCGAGTGCCGTTGCGATCCCGGCTACTTCAGGGCAGAGAAGGATCCCAAGA  
AAATGCCCTGCACCCAGCCACCGTCGGCGCCGCAAATCTGACGGTGAATTCGTGCA  
CCAGTCCACCGTGTTCTGTCTGGAACGCGCCGCACATGCTCGGCGGGAGGACAGA  
CACGACTTATAGGGTGGTCTGCGACGCGTGACGATGGGTGTCAAATACATTCCCAAC  
ACCGAGGTTTTCAACGACACGAAGATTACGATAACTGGATTGAACGCGGTCACCACTT  
ATCGATTCCAAGTGTTTCGCCGAGAACGGGGTCTCGGCGTTGGCCGGCAAGTCGGAATA  
CGTGGACATCACCGTGACCACGGATGCGAGCGTGCCGAGTTTGGTGAGCAACGTGAG  
GATTACGAGCGTGAAGAGCTCCGAGTTGAGCATAAGTTGGGACGCGCCGATAACCGAG  
ATCGGCGGGGACAGCGACCTGGTGGAAGATACGAAGTGAGGTGTTACCCGCGTTAC  
GACGACGCCACCAACGCAACCGTGATCCAAACCTCGGAATTGTCGGCGACGTTCAA  
GGCCTGAAACCATCCACGGATTACGCGATACAGGTTTCGAGCGAAAACCTACGCGAGGTT  
GGGGCGAGTACACGCCCGTCGTGTACAAGAAGACGCCTCACGCTATGGGATTAGATTA  
CGTCGGGGAGGATGACAATATGCAAGTGAGAATCATAGCGGGTGCTATAGTCGCCGTG  
GTGGTTCTTCTCGTCATCATCATCATGACAGTCTTGATATTGAGAAGCAGGGCCTC  
GGACGAATGCAACAAGAAACAGCCGAGCGATTGCGACACTCTGGAGTATAGAAACGG  
CGAAG

>novel\_circ\_001919

TGGGTGGAAGAGTCGTTACCAACTTCGACAAGGGCATCAATTGGCGGAGTTACGTTG  
TCTGCGACGTTCGCGTACAACAACGTGAACAATTGGCTGTGGACCCCGTTCATAGAGAG  
GGGACCGGCGAACCGCATGTACATAGAGATCAAATTCACGACTCGCGACTGCTCCCTG  
TTCCCAGGAAACGCGCTCAGTTGCAAAGAACTTTTCAGCCTACTTTACTACGAGTTTCG  
ACGTGGCCACCAAGGAGCCGCCACCGTGCGGAAACGGACAGTTACAAGTTGATCGGGC  
GCATAGCCGCTGGGGAGGGAAGGTTCAACACGAACACCGAGGTGGTGATAAACACGG  
AGGTGAAATCCATCCCCGTGACGAAGAAGGGAGTCTACTTCGCGTTTCAGGGACCAGG  
GCGCTTGTCATCTCGATCCTTGCCATCAAGGTTTATTACATCAGTTGCCCGGAGATTTCCG  
TCAACTTCGCCCCTTCCCTGCCACGCCGACCGGCCGCGAGGTGGCGCTGATCGAGCA  
AACGATCGGCACCTGCGTGGCGAACGCCGTCGTGATCGAGCAGCCCACCTTCCTCTGC  
AAGGGGGACGGGAAATGGTACTTACCGAGCGGGCGGGTGCCACTGCAAACCGGGATAT  
CAGGCCGACGTGGAGAAGCAGGAGTGCACCGAGTGCCCGATCGGTAAATTCAAACAC  
GAGGCGGGGTCGCACAGCTGCGAGGCCTGCCCGGCCACAGCAAATCCTCCGATTAC  
GGATTACCGAGTGCCGTTGCGATCCCGGCTACTTCAGGGCAGAGAAGGATCCCAAGA

AAATGCCCTGCACCCAGCCACCGTCGGCGCCGCAAAATCTGACGGTGAACCTTCGTCTGA  
CCAGTCCACCGTGTTCTGTCTGGAACGCGCCGCACATGCTCGGCGGGAGGACAGA  
CACGACTTATAGGGTGGTCTGCGACGCGTGCAGCATGGGTGTCAAATACATTCCCAAC  
ACCGAGGTTTTCAACGACACGAAGATTACGATAACTGGATTGAACGCGGTCAACACTT  
ATCGATTCCAAGTGTTCTGCCGAGAACGGGGTCTCGGCGTTGGCCGGCAAGTCGGAATA  
CGTGGACATCACCGTGACCACGGATGCGAGCGTGCCGAGTTTGGTGAGCAACGTGAG  
GATTACGAGCGTGAAGAGCTCCGAGTTGAGCATAAGTTGGGACGCGCCGATAACCGAG  
ATCGGCGGGGACAGCGACCTGGTGGAAGATACGAAGTGAGGTGTTACCCGCGTTAC  
GACGACGCCACCAACGCAACCGTGATCCAAACCTCGGAATTGTGCGCGACGTTCAAA  
GGCCTGAAACCATCCACGGATTACGCGATACAGGTTTCGAGCGAAAACACTACGCGAGGTT  
GGGGCGAGTACACGCCCGTCGTGTACAAGAAGACGCCTCACGCTATGGGATTAGATTA  
CGTCGGGGAGGATGACAATATGCAAGTGAGAATCATAGCGGGTGCTATAGTCGCCGTG  
GTGGTTCTTCTCGTCATCATCATCATGACAGTCTTGATATTGAGAAGCAGGGCCTC  
GGACGAATGCAACAAGAAACAGCCGAGCGATTGCGACACTCTGGAGTATAGAAACGG  
CGAAGGACTAGTTGTGACCTACATGCACTGCAAAATGGACAGTTCACCGATTGTGACA  
ACCCACACCAACAACAAGAGCAAGTCCTCGCTGACCACGCCGCTGTTACACCTGCA  
GTGGGAGTTGCCGCCGCGAGTGCTGGTGCGCGGGTGCGCGCGGGGCGAGAAGTTAC  
GTCGATCCTCACACGTACGAGGACCCGAACCAAGCCGTGCGAGAATTCGCGCGGGAG  
ATCGACGCGGGATACATCACGATAGAGGCGATCATAGGTGGGGGAGAGTTCGGCGACG  
TGTGTGCGGGGAAATTGAAGTTACCGCCGACGGTTCGAACGGAGATCGACGTTGCCAT  
CAAAACACTGAAACCCGGCTCAGCGGATAAGGCGCGCAACGACTTCTTGACCGAGGC  
ATCGATCATGGGCCAGTTCGAGCATCCGAACGTGATATTCCTGCAGGGTGTTGTCACGA  
AGAGCAACCCGGTGATGATCATCACCGAGTTCATGGAGAACGGGAGCCTGGACACTTT  
CCTTCGCGCAACGACGGCAAGTTTCAGGTGCTCCAGCTTGTGGGCATGCTTCGCGGT  
ATAGCGAGCGGTATGCAGTATCTGGCCGAGATGAACTACGTGCACCGGGATCTCGCAG  
CGAGGAACGTGCTCGTGAACGCCGCCCTCGTTTGCAAGATCGCAGATTCGGATTGAG  
CAGGGAGATCGAGAGCGCGACGGAAGGAGCGTACACGACCAGG

>novel\_circ\_001920

TGACCACGCCGCTGTTACACCTGCAGTGGGAGTTGCCGCCGCGAGTGCTGGTGCG  
CGGGTGGCGGCGGGGCGAGAAGTTACGTCGATCCTCACACGTACGAGGACCCGAACC  
AAGCCGTGCGAGAATTCGCGCGGGAGATCGACGCGGGATACATCACGATAGAGGCGAT  
CATAGGTGGGGGAGAGTTCGGCGACGTGTGTGCGGGGAAATTGAAGTTACCGCCGGA  
CGGTCGAACGGAGATCGACGTTGCCATCAAAACACTGAAACCCGGCTCAGCGGATAA  
GGCGCGCAACGACTTCTTGACCGAGGCATCGATCATGGGCCAGTTCGAGCATCCGAAC  
GTGATATTCCTGCAGGGTGTTGTACGAAGAGCAACCCGGTGATGATCATCACCGAGT  
TCATGGAGAACGGGAGCCTGGACACTTTCCTTCGCGCAACGACGGCAAGTTTCAGG  
TGCTCCAGCTTGTGGGCATGCTTCGCGGTATAGCGAGCGGTATGCAGTATCTGGCCGAG  
ATGAACTACGTGCACCGGGATCTCGCAGCGAGGAACGTGCTCGTGAACGCCGCCCTCG  
TTTGCAAGATCGCAGATTCGGATTGAGCAGGGAGATCGAGAGCGCGACGGAAGGAG  
CGTACACGACCAGGGGTGGAAGATCCCGGTGCGATGGACGGCCCCGGAAGCGATAG  
CATTCGAAAATTCACCAGCGCTTCCGACGTGTGGAGCATGGGGATCGTTTGTTGGGA  
GGTGATGTGCTACGGCGAGAGGCCGTACTGGAAGTGGTCCAATCAGGACGTGATAAAG  
TCGATCGAGAAAGGATACAGGCTTCCAGCACCGATGGATTGCCCGGAGGCTATCTATCA

GCTGATGCTCGATTGCTGGCAAAAGGAGCGAACTCATCGCCCCACTTTTCGCCAATTTA  
ACGCAAACATTGGACAAACTGATACGAAGCCCGGACACGTTGAGGAAAATCGCCCAG  
AACAG

>novel\_circ\_001922

AATAATGCTGAGGTTCGTTTGGTTACTCGGAATAATCGTTCACAACACTTTTTCGCGACAC  
AAGTTCCGGTGAATAATCCCGGTGAATGGTCATGGCAAGTCGATAATCCCGGGGAACC  
GGGCAAAGGGAAAAGAGCTGTTTTAGATGGCGATGGAGATGCAAATCCGAACATAGA  
AATCGTCAATCCTCCCAACGAGCAACGATCCGTAGAATCGGTGATCGACGAAATTCTC  
GTGTCTAATCGGCAGGGTCGCAACGTCGAGGGTTTCGATCAATTATACGCAGACCCGG  
AGGTGAAGAATGTCCTTCAATTGGGAAACGAAACGATCGCTCGTACATACATCAGGGA  
CAAACATATGCTCTCTAGGATTGATGAACTGCGACAATATCGAGGGACGTCGGCCGTACT  
ACTCTCCTCATCGTGGGATATATCCGCAAGATATAATTTACGCTCAACCCGTGACTATCA  
AACCTGTCGGCAGACCTCTACCAGCCGTACCTGTGAAACGGCCATACACTCCTGCCGT  
AAGACCGCCTGGATTTATTTCTCCGGACCACCAGCGCCGGAAGTGATCTACGGAGTT  
GGTGGTGCGCCTCATCCACCTTCGTTTGTCTCCTCCTTCTTATCCCGTGTTCAAGAA  
ACCCGGCTATCCCTCATTCTCGGCGAGGCCTGTGTACGAGGCAGGAGAAAATTTTCGAA  
TTCGCGGGCAACGGTCAATTGATCGACAAAAAGCAGATCGCGTTGAGACCGACGATC  
GGCTCGGAAACCGTCCAGCAACACGTTTCATCATCACTATCATCACGCGGATGGTGGCG  
CGACGATCGGTGGCGTCCCTTCGTCTCTTAGTTACGGTTCTGGAAATATAGGAACGGGT  
TACGATATTCACAGCTCTGGAGTGCTCGGTGCCGTTTCCAGGATTTGGACGATTATAA  
AAAGGCGTTCAAAGTAAAAGGAACGACGAACAATGATGGTTCCGTGTGCGCGAGCAG  
CTACGCTGAGAGATATCCCGTGTACGAGAAACCGACGCGAGACTTTGATTTCGCACGGT  
AAGGCGGACGGTTATAAATCTGGCAAATACTTTTACCAGGGCAACTACGTTTCTCCTAA  
CGCCGTTCAATCGTCTTCCAACGATTACGTTACCTCTGGATCGACTAGCAGTTATTATTA  
CGGAAACAACGAAGGCAATGATTTTATACGGAGGATTGCGTCTGCGTACCGTACGGA  
CAGTGCCCAAGGGAACAAGCAGGTCGTAAGGACGATTTGTTCTTCCCATCGATCCTC  
GAAATCTGGAAAAGAATATCGAGGCCGAATCTACGGAGGAGACAACCGCGATGGTGAT  
AGAAAAGAATACGAACGAAACGTTTGCCTTCGGATCGAATGATTTTAAACTGTTATAC  
AAAAGGATGAACAGCGAACTGAGGAAACGAACAAAGCTCGAAGCAAGAGGGAAACG  
ACGACGAGTGATGGCGAATCGATAAATATCGAAGGAAGAAAGAAGTCTAACGGTGAA  
GGG

>novel\_circ\_001923

CGCGAGGGAATGAAATCAAACGCATTTATGGGTAGCAAAGTGGGAATAATTACGATTA  
CGGTCACGATCACAGTCACCACGTTTCATCAGCACAGTGATATCATCACAGTTTACCCA  
AGATATCAATCGTCCAAGTAACGAAGAATCTCAAGGAATCGAAATTTATCTTCTAAAGG  
AAGAATCGCGTTAGTCGATGATTATTCACGATCGTTTCTTTGCAACAGTGCGAATCGG  
CGATAGATTTGGAAATAAGAGGAGAGAGATTTATCCGCATCGAGGAGGAGGAGAGAG  
ACGGAAGTGAAAAGAAAAGGTGGTTCGCGAGATCGAGCGAAAAGCAAAATCGAGGCG  
AAGATCGAGACGTCGGTAATGAGACAGGGAAAGGAAAAGTGTGAGAGAGGCGGTC  
GCGAGACAGGGGCAGTGCCGTATCCTGGGGGCCAGGGTATGCGCAAGATCTATTAAT  
AACTTGTAATACGGTAGTAGTGGGGCGCTGCCCCTAGCGGGTGAAAATAGAAAAGAA  
TGTTTTTGGAATCCAATTGGACTTGGTTGGCCGAACGATGGGGCAATATGGCCGACTTG

GCCGAGCGGGTGGACGATCTGATATGCAGTTTCGACTCGGCTGGTGACACGACCATGG  
 ATACCTTGTCGATGCTCATATTCGGCTGGATGTTGTTTCGGATTGATGGTACTGTGCGTCG  
 GCAAATACGTTTACAATCGGTTTCGTTTTGAACGGGCTCAGTTCGGGACAATAGTTACC  
 GCCAAGGACGGCCATATCGTCCACGGTGATAGCGTCGGTGTCAGTGGTGGTGGTGGTG  
 GTGGTGGTGCTGGTGGTGGTGGCGGCAGTGGTGGTGGTGGTACTGGTGGTGGAGGTG  
 GTAGTGGCGGCAAATTGCTTTTGCTTGCCAAGCAAAAAATCGTTCATCCTCGGGGGC  
 CGGGGCAGGTGGTGGCGGCGCCGGTTCCGGATCGCTTGCATCCGTCGGTGGTGCCGCC  
 GGTCCAACCTCCGCTACCTCGCCTTACGTCCCGCCGACACCTCCTGTCCGCAAACGTCT  
 CACCAGGAAGACATCCGGCGCTCTGATCAGCCCGGCGAGAAGCAGCAAAAAGTTTGCA  
 TCTACCGACGGCAACTGGAGCCGACCCCGACGCTGTCCGCTGGGTCAACGAGGTTATC  
 GTTTGGCTCTACTCCGATCCAGCGATTTTGACGAGCTGTTGGCCGTTTGGGTCGCGTC  
 TCTCAATCAATTTACCGCCAACTCTGTCTGACGAG

CGAAGTGAAGCATATACGTCCGCTCGTGCCTCGGTAATGGTATATGACGACAGCTTAATAAAA  
AATGGGTACCAAGTGGCAGTTCCTCAGGACTCTCCAAAGTTCAGTTATACCATCATCAA  
GTGAATAATACATTTTCGCGTAGTGGGAAGAAAGTTGCAGGATCACGAAATCGTGATCA  
ATTGCGCGATCCTCAAAGGATTAAAATACAATCAGGCGACAGTCACATTTTCATCAATGG  
CGAGATAATAAACAAAGTATACGGTCTGAATTTCTCCAGTAAGGATGACGCCGACGCATT  
TGCTAGGGCGATGTTACAAGCACTCGATGTATTGAGCAATGGAAGCAATATATCGAGAA  
GTCTTGCACCTGCCTCCGCTACTCAACAACAATCCGTCTTTTCAGCAACAGCAACCTACT  
AATGCTCAATACGATGAAGATATGGGATACAGAACCATGACCAGAGAAGATGTAGCAA  
TTATTCAGGAACGCAGAATGTCTCAACAAAGCCAAGCAACAAATAGTCCGAACGCAAT  
TTCTCCAAGTTGTCTCTCGCATCGCAGCAACAGCAACAGCCGCCTCCACAACAACAA  
CAACAACAACCGCAACCACAACCTCAACAATCTATGCAACAACAACAATCGCAGCCG  
CCAGCGCCACCACAACCTCCGCAACAGCAGCAACAACAACAACATCAAGTGCAGCAG  
CAGCAGCAACAATCGCAGCCATTGCAGCAACAACCACAATCCGGTCATCATAGAACTT  
CGTCAGCACCTCCAGCTCCGCAACCTCAGCAACAAACTGTTATACAATCGATGCAGGT  
TACCGGTGGCATTGGAAGTAGTGCAGCACAAATGACGAGCGGGGGTGCCTCCGGTA  
CCTCCACCACAGCCACCTATGGCGGCAACAGCTCCGCCGTGTCCACCGGCAATGATAA  
ACTTTAACGTCCCGGTACCACCACCTCCAATGATGATGAGCCAATACGCGCAATCCCCA  
TCTTCTCAATCAAATTTGCCGAATCAATCGCAAGCACAGTCAATTTATGGTAGTAGTCA  
AGGAAATCAGTATGGAGCCGCACCGAACAATAGTCAATACGCGACTGTCGCTGTCGTC  
GGGCAAAGTCCATGCCAGTATTCTTCTGGAAATCAGAATAACTTCTACAATAACAACGG  
ACAAGTCGCTAACGCGTATTCTAGTGGACAGCCTGGACAAACAAATCAGTATGGCGGC  
GGTGGTGGTAGTAGTGGTGGTGGTGGTGGTGGTGGTGGTGGTGGTGGTGGTGGTGGT  
GTAGTAATTCGATTGGTCAGTATGCCAGTAGCGGAGCTGCGACAACAGGTCAGGGTTAT  
GGGGTAGGTGTCGAGTCAACGTTGGTGTGCGCCAGCCGAATCAGTCTCAGTACAATA  
TTGTATCTCAGGCACAGGCACAATATGGTACTAGCCAAATACAAGCAGTTTCTAGCGCT  
ACGAATCCTTATGGAACGCCATCAAATTCAGTGAATCAATACAGTAGCACTAGCGGTGT  
AGGTGGTAGCGGTGGTACTTGTGGAAATACTGTTGGCAGCGCTAGCGGTGGCCCTGGC  
AGTGGACATCACGTACCACCTGTTAATCCTAATGTTTACGCTCCTCTCGGTAATGCTGGT  
CCTCAACCACCTCCTATGCTACCAGTGGCTGGGCCTGCCGCTCCACCTCCACCTCCTCC  
ACCACCTGCCCCGAAGATCAACGCTGTTAATCTAAATCCACTTTCTGGATCTGGTTCCA

CTGGGTCAGTAAGTTCTGTCACAAATAGCGAGCCATCACCGGATTCCAATTCGTTGGCT  
GCAGCAATTCAAGCAACTCGTCTTAAAAAGAAGCAACAGGCATCACAGCAACCAGTA  
GAAAACAGTGGTTCTAGTACTAGTAGCAGTGGAAGTGCTGGAAGCGGAAATTATGGTA  
CTTTAGGAAGAGGTGGAGGTGGCGGTATGGCTTCCATGATGGATGAAATGGCTAAAAC  
TTTAGCCCGTAGACGAGCTGCCGTTGAGAAAAACAACCCGAGCAACCACAAGAACC  
TGAAAGTTCACCCGATAAGAAATGGGATAAGAATAGTTCATCTAACAATAAATTCTCAA  
ATGGTGCCGAATCACCAAAATCGGTTGCAAGAGGTTTGGTTCAGCTTCAGAAGATAC  
ACTTTTAAAAGTAAACGGTGTTAACGATGGGGCTGTGCTCACTGCTCAAGAAATGGAA  
GCATTTAAAGCAGAGATTATCAAGGAAGTGCGTAAAGAATTTCAAAAGATGAAACAAG  
AGATTGTAGATGCTGTGAGAACGGAACCTAAGTAGAAGATAAGGATGAGATGCGGACCA  
GTTTGAACATAAACGAAGAAAAAATGAAGGATTCTACCATTGTGTAGATCAACC  
GAAACGATCATCGACAACCGTACACGAATTTTTTTTTTACTACGTATTGCGAAAATGGA  
ATGCAGTTATACCCCATGTATATCAGACATGTTTGTGT

>novel\_circ\_001925

TAGTACCAGTGCGAGCAAAATATAATCTCCATAATTATTGAATGATGAAGGAATCATTAG  
TAGAAATTATCAAATAAACATGGCATCTCAAATAAAGAATTTAATGGTTAACTATTAGGC  
ATATTAAGGATATGCTTTATATCATCAGGAAGGAACTAAATGAATGAATAAAATTATAAG  
GAATGATATTCTATTTGAATCTATTGGATGTTAGATAAAGTGAAAAATGTCTGGTGATT  
AGGATGGAATACTGTTATTCACCATCCTTCAGAATTAGAATTACAGAATTGGAATTGGG  
AAGAAAACGATGGAGAACAAGAAAGGGAGCTCCCTTCAACTGTTGATATGGATGCTAT  
AAAGGGTGTTGGTAGCTGGGATCCAACCTACTGAACCTAATGGAACAGATTTCGGTTGAT  
TCCGAAGAAGATTTCAGATTCCGACGACGAAACCTCTGGCGGTACAGAAGGTAGTTGTT  
CTTATTCAGATTTCGAATTCGGATTTCAGACGACGAAAGTAGCGGTGACGAGGAAGAAGA  
TACAGGATCCAATTCGGATTGTACATCGGAACATAGCGAACAAACATTTTCCATTCAA  
AAACAAATTTTGAACCGGGAGCGCTTAAATTAAAAATCAGTATGAAAGGTCCAAAAAA  
AGAGGATTTCGAAAAAGAAAAAATAAAAGAAGCATAACAAAAAAGTTAAAACGAA  
TCGAGGAGGAAAGTCATCAGAATGCAGTAGTGATGAGTCTGACTCATCCGAAAATCAT  
TCAACTTCACAACATACACAGCAACAACAGCAACAAATGCAACAATCTCAACAACAA  
CAACAGCCACAACAGCATCCAACCTCTCAAGAGATTAATCAAGAAGATTGCGCGGCTA  
TTTTACCAGATCAAGAGCACGAAGATGCTCCATTTGATGGATTGAAGATTCAGAAAGT  
GGTCG

>novel\_circ\_001926

TATCGGCGCTCCGATCACAGCAAGTTCTGCTCCAGAACGTGAGCCTGTACACCAGCG  
GGAAATACAAGTGCGAGGTGATCACAGAGGCTCCTAGCTTCAACGCGGTCAACGCGG  
AGGCCAAGATGGAGATCGTAGTTCTACCCCAAGAGGGACCGTTGATAACGGGCGAGG  
AGAAGATTTACGCGAGCGGCGACATCCTCGGGTTGAACTGCACCAGCGGCAAGTCTCA  
TCCCGCCTCCACGTTCAAATGGTTCATCAATGGGAAGCAG

>novel\_circ\_001927

GTCCACCGACGATCCTGGTGAGGCCACAATCGCAGCAGGTGAAGGCAGGCGGGATAG  
CGAGCTTCTACTGCACAGCGGAGGGAGCGCCACCGCCCCAGATTCACTGGCGGAAAA  
ACGGAAAGAGAGTTTCCCAATCTCAGTCACGGTATCTGGTGCACAACCTACGAGAACGG

AGCTTTGCTGCGGATCGAGCCTGTGAGGCCTGTTCGAGACAACACGATGTACGAGTGC  
CTGGCCGAGAATGGAGTCGGCGACGCCGTGTCTGGCGGAGGCGCAGCTTCGAGTCTAC  
GAAG

>novel\_circ\_001928

AACCGGGTACCGCACCGCGGAAGGTTTCAGGCCCGGCCATTGAGCTCGAGCACGATGG  
TCATACAATGGGTCGAGCCAGAGACACCGAACGGGCAAGTGACGGGTTACAAGATATA  
TTACACGACGGATCCGAATCAACCGATGGCCTCCTGGAAGTATCAGATGGTGGACAAC  
AATCAACTGACCACGATCTCGGATCTGGACACCCACACGATATACACGATTCGAGTGC  
AGGCGTTGACAAGCGTCGGTCCCGGTCCATTGAGCACACCTGTCCAGATTAAGACGCA  
ACAAGGGGTGCCGAGCCAACCGGAGATGTTGACCGCGATAGATATCGGGGAGACCAC  
GGTAACCCTCCAGTGGAATAAACCTATTCATAGCGCGGAAAATATTCTCAGCTATGAAT  
TGTATTGGAACGATACGTACGCTCAGGAGAAGCATCATCGCAGGATACCTGTCACCGA  
GAACTACACGTTGACCGGCCTCTATCCGAACACCCTGTATTACGTTTGGCTGGCCGCC  
GGAGTCAACGGGGGGAAGGAGCCACCACGATACCGTATCCGGTTCGCACGAAGCAGT  
ACG

>novel\_circ\_001929

AACCGGGTACCGCACCGCGGAAGGTTTCAGGCCCGGCCATTGAGCTCGAGCACGATGG  
TCATACAATGGGTCGAGCCAGAGACACCGAACGGGCAAGTGACGGGTTACAAGATATA  
TTACACGACGGATCCGAATCAACCGATGGCCTCCTGGAAGTATCAGATGGTGGACAAC  
AATCAACTGACCACGATCTCGGATCTGGACACCCACACGATATACACGATTCGAGTGC  
AGGCGTTGACAAGCGTCGGTCCCGGTCCATTGAGCACACCTGTCCAGATTAAGACGCA  
ACAAGGGGTGCCGAGCCAACCGGAGATGTTGACCGCGATAGATATCGGGGAGACCAC  
GGTAACCCTCCAGTGGAATAAACCTATTCATAGCGCGGAAAATATTCTCAGCTATGAAT  
TGTATTGGAACGATACGTACGCTCAGGAGAAGCATCATCGCAGGATACCTGTCACCGA  
GAACTACACGTTGACCGGCCTCTATCCGAACACCCTGTATTACGTTTGGCTGGCCGCC  
GGAGTCAACGGGGGGAAGGAGCCACCACGATACCGTATCCGGTTCGCACGAAGCAGT  
ACGTCCCCGGGGCTCCGCCTCGCAATGTAAGCGGAGAAGCGGTCAGCCCGACCTCCAT  
ACGGGTAACATGGGAACCAACCGCCTGCCGATCGATCGAACGGAAGGATCGCGTACTAC  
AAGCTGCAAGTGGTCGAGAGCGGACGCTCCGACTCGGAGGCGAAAGTTATCAAACG  
AATGACACGCAATTCGTGTTGGACGAACTGAAAAAGTGGACCGAGTATCGGATTTGGG  
TATTGGCCGGGACCAGCGTAGGTGACGGACCTCCGAGTTATCCTATCTCTGTCAAACT  
CACGAGGACG

>novel\_circ\_001931

GCTGGTTTCGACACGCGATGTAAATTACTCGAGGGCGGCAATTTTTACATCCGGTTTTG  
CCGTGAACGCGGCAACCCCTCCCGATACCCCGACGATTCCAACTTTCGACGCGGAAAA  
CACGGTTTCGTTGGACGAGTAGCGGAAACGCGATAACTATTCAGATAAAACCTCTA  
GGCAGCTTTCGAGGTACATACAGTACATATACGCCTATTCCCCTCCCTCTCTCTCTC  
TCTCTCTCTCTCTCTCTCTCTCTCTCTCTCTCTCTCTCTCTCTCTCTCTCTCTCTCT  
GAAATCGCTTATCATCGATCGAAATCTAATACGAATTTAATATCGGTGGAAATATTAGCC  
GTAAAGGTAAAAGACAGAGAGACGTGTACCGTGTATGTGTTATCGAGCGAATTTTCGAT  
GATGGGAGCGAGAGAAGAAGAAATTGGGAGAGGAGGGGATGGAGGGAGAGGGAGG

GGAGAGGGGGATATGGGGCATAAGCTTGGACAAAGATACGGGAACGAAATAGAAATG  
GAATGGAACGAAATGGATACACCAGCGGCGCATTAAATTTTCGAGGTTCAACGACCTATC  
GC

>novel\_circ\_001933

ACAGTGAGTGTAGATTCCGCAACGACGACGATGTTTAATTCAGCGGCATATTTTAGCGA  
AGATCCTGCGGCTGATCGTCTGTTTCGTCTGACTAATCCTTGACCATTGTACATTTCGTTA  
TGAATATTCTATCATTGTTTTTTCGACACAGAAATTTTTGGGTGAAGTTTTAGCGAAAA  
AGAATTTACTACGTGTTACAGTAGGTGAACCTTTGGCTTCTTGTATATTTGAAATTATGA  
TATGTATTAATAATAATGTATGATAATTCATTTGATATTATTATTAACACATTATACGTATATA  
TTTACACATTATACGTATATATACATGAATGATTATAATATCTATGATTTCGGATATCGTATTT  
CGTGGAATTTGATTATCTTTATAATAGTTATCATTATCGTTCTCGTCGTTACGAGTATCGTT  
GTATCATCATCGTTAGGTATGTATAAGTTAAATATTTTTATGAAAATTTAATTATTTATATT  
GATTTTTTATTAATACCGATACATACTTACCTACGATGTATTGAGATACGACAACACGAATT  
ACGATATCGTTAATATAATCATTAAATTGTTCCCTAGGTGAACGAGTGGTAAATCGATAAT  
TCTTGCAATTATACGATAATAATATGTGCAGTTTGCAAGATAGAACAGATCTTTTTTTTAT  
TAATATATTTTCTTTTCCGTTTCTCTATCTTTTATGTAAGTATGTATGTACATACAAATATGT  
AAAGTTTGAAATGCATAAGCTCAAGAGAAGAAGCAAGTTGGAACATCTTGTAACATAC  
CTGTGATTTTTTCGCAATTTTATCACAAATAATTATGCTGTGTATATACAGTTTATCTCAATT  
TCAATAATACAAATTTCTGCAAGATTTGTAATCGAAAATTGGAATCGTTAGAACAAATTTG  
ACATTTTAATGTAAACAATGTTGTATCAAAGAAAACGCGTTAAATAATATTAAGCAG  
CTGCGCTGCTTGAATTTTTAAATATAGAAAACATACAATACGGTCCCCGTATTTTTTTTATT  
TTGTAGACTTATAGATGTGTACGCATATAATATTTGACTCTATGAGACGGAATCGAAAA  
CATCGAAAGAAGGCGCGACGCGGCGCGTTCCAGTCAAGACAAATTTAGAAATGGACA  
ATCTGAAATCCAACGTATATTAATAAGAACGAATAGTCGTTGACCGAAAACTTTCTATT  
CTTTCTTCGACGAATTATACGGTCGCTCGCATAGTTTATAGTAAGTAGTCACGTATGGT  
TTTATATATACATATATGTATATATATATAAATATATATATTATACATATATTACATTTTCGATTT  
TTTACAAAAACATGATTGTTTTAGAAATATTTTTTACGAGAGAGTTTTCTGATCTTCTTTAT  
TCACAAATGATCGATTAAACGCATAATAATCGTTATAATAAATGAAAGAAAAGCTTGGATA  
GGATATCGAACTTACTTTTATATAATATATATTATATATATATATTATACGTATGGTTTATCTG  
TTGTGAATAATTGTATAAAAAAAATAGAATAATACGACATTATGTGAGATTCGAACAGAT  
ATCATAATAAGTTATAATATGTTGTAGTGATGGTAAATTTTCAGGAAAGATTCATCGGTA  
CGAAGATACATCATTGGTCATGTACGAATTTAAAAGAACGACGAGTATGTACGTTGAAT  
TTATATTTCTGTTTTGTAAAGTTAATCAGTCGTGGATTATTATATAGTATATCGCATATTATT  
ATTGATCTCTTCGACAATAGTAACCAAGAGTTTTACATTTTTGACAGAGATGTTGCGGA  
TGGACCTTACTTTGGTCGGACACATCCAATCCGTCTGGTTTCTCTAATGGTCTCTGAAA  
ATATGTAGTAAAATGTAACGGGATTACGTAATTACGCAATCATGTTGGCGTGAAATGAA  
AATGCGGTAAATTTGTGATTACTCGTTGCCAGGCTGGGACAAACAATTCTAATACGAAT  
TTGATGCAATAGCAGATTATTAGCAATCAAAG

>novel\_circ\_001934

GATGACGATCAAGATACTCTTATAAAAGGATTATTCAGTTTAAAAGAGGTGCTGAATGA  
AGCAAAAGACTTATCTTGTTTAGATCCAGGCGTTTTTTTTGGCTCCATTTTTAGAGATTAT  
ACGATCAGAAGAAACAACCTGGACCTGTTACAAGTCTTGCATTGTCTGCTGTTAATAAAA



TGATATCTTATAGTCTTATAGATTTCAGATCATCCAGCAGTAGCCCAATGCGTAGAAGCTA  
TTGCTGATGCTGTTACGCATGCAAGATTTGTTGGGACTGATGCATCTGGAGATGGAGTT  
GTTTTAATGAGAATTCTTCAAGTTTTGAGGGCTCTTATGTTAGCACCAGCTGGTGATTAT  
CTTTCAAACGAAAGTATTTGTGAAATTATGCTCAGTTGTTTTAGAATATGTTTTGAAACA  
CGACTCAGCGAATTATTAAGAAGGACAGCAGAGCATTGTTTAAGAGATATGGTACAAC  
ATCTTTTCACACGATTACCTCAATTTGTTGATGATAGTAGAGTTTTATTAAATATGAAAA  
AAATGAGAACAAATAGCATGGAAAGTAATCGAGGTAAGAACAGAAGAAATAAAAAATC  
ATAGTAAACAAAAGACAAAACAAAATGTAGATAATATAGGAGATATTGAAGATCCACTT  
CCAAATCCAACTGATAAAGTTAGATCGAGTTGTTTAACGACGTCTGTTAGTTTCGACAGG  
AAATATTGTTGATATGCAAGGTTCTTTAGATCAAGGTAGCATCGAAAAAATAGAGGAAG  
AAAAGAATGATAACAAAATCATAACAAAAAAGATTTAAATGATGTAAACGAAACTATT  
AAGCAGGGAGATATATTTGATTTGAAAAAAGAAAAGGAAGATATAAAAGATTTCGAAAG  
AGTGTAAATAGCAAAATTGTAGTGAAACAGAGGAGAAAAGAAATGTGATTGATGAAA  
AAGAAATTTTATTGAAAGAAGATAAAAATATAGACAATATAGAAATAGATAAACATAAT  
GAAAGTAAATCAGTAAATTTATTAAAAGAAGGAAACCAAGAGGACATGAAGAAATCGA  
TAAATGATAAAAAAATACAGATTCAATAAAATCTTTGGCAGGAAGTGTTGAAGATTTG  
ATGTCAGTCGATGAAAATATAAATAATGCATACAAAACATCTAAACCAAAGAATCTGA  
ACAAATTGAAGAATATATAAATGCCCAAGGAGTTCGTTTTATGCCACATCAACAATTAA  
CACCTTATGGTGCTTTGTGTGTCCGTGAATTATTTAGATTTCTCGTATCTTTATGTAGTCC  
TCTCGATAAACAAAATAACGAAGTTATGACACATCTTGGGCTCAATTTATTGCAAGTAG  
CTTTAGAAATTGCGGCTGACTATCTTTCCAATTTCCGTCATTACTGGCACTTGTGAAAG  
ATGATCTTTGTAGAAATCTTATTTTGCTTCTTGGCACAGATCGATTGTGATTCTTGCAG  
CGGATTTGCAAGTATCGTTCTTGCTATTTGAATCGCAAAGACAGCATTGAAATTCCAA  
ATGGAGCATCATATAAACAAATTAATGGAAATAGTAAGTTCAGATTCGAATAGGATATCA  
TATGATCAGCGTGAATTAGCTCTCGAAGCTATTGTACGATTATGGAGAATATCCGGTTTA  
CCAGCAGAATTATATTTGAACTATGATTGCGGCTTGATTCTTCTAATTTATACGAAGAAT  
TAATGAAATTATTGTCAAAGAATGCTTCCGCATTAATGGGTAATATGCAAATATGCAGT  
TCGTTTCTTTGGATGCTATATTCACGTTGATTTCTGGAATGGAAATCAGATGTAAAGGCT  
ACAAAGAATTGTGTAAACCATCTCGACATGATGCATCACCAAATCTTCCAACACGAGA  
GGAAGTCTTAGTATAAAAGCAAATAAACGGTGGTTGATGCTTGGTACAGAAAAATTC  
AATGAAAATCCACGAGAAGGAATTGCTAAACTTACGGAACATAATCTTTTGGGTGGAA  
GTCCGGGAAATCCCGATCCAGAGAAAGTAGCTAAATTTTGAAGGAAAATCCTGGCCT  
TGATAAAAAAGCTATCGGGGAATACATTAGTAAAAAAGAAAATAAAAATGTTTTAAATT  
GTTTCGTTTCATAGTTTTGATTTGAAGGATATGCGAATCGATCAAGCTTTACGACTTTACT  
TAGAATCTTTCAGACTTCCTGGCGAAGCGCCACTTATTTCTTTGTTGCTCGAAAAATTT  
GCCGAACATTGGCAC

>novel\_circ\_001935

AGAGGTGTGCGTAGACGAAGGCCAACAATTGTCCTTGGCTCATGGATGTCAATTTTAC  
GAGGTTAGTGCGGCGGAAAGTCCTGCGGGAGCAGCACTGGCATTTCAGCGCTGCTC  
CGTGAGGCAAGATCGGTTCAATTGCTCCGAGCACTTCCTATTCGCCGGAAATTGGGCG  
TCCACTCGGTCTCGAGGGTGCTCGGCACGATCTTTGGCAAGAATACGACGAAGGACCG  
CAAAAAGAGGCCCTCGTTAAGCATATGACGCCTCCTCTGCGCCCTCCTTCTCGGAGGT  
CGTGACGAACCTGACAGAAGGACCGATGTGATTGTTCTTACCAGCAACGTCTATTCTGA

ATCGTTGACGAGAACATGGAAAACGATTATCTGACCAACGTGGATCAACAGTCGCCGA  
TCTTTCGCCTTTTGATGTCTTCTGAAAAAAAAAAGTTCCTGGCGTTTTGATTCCGGTATCA  
AGACTGATATAGAGAAACATTCGGACGTTGTCTGGCGGACAG

>novel\_circ\_001936

GTTTGAAGCGTATATGATGACCGGTGACCTAATGTTGAACCTGTCGCGCACCCAGCAA  
AGCAGCAGCCTGCTCCCGAAGCACCAGAAGAAGGTCGATTCCCTGAGGTACAACAAT  
CATCACACCCACCATCACCATAATCACCACAATCACCATCATCATAACTCGGTACCCAC  
CAGTCCTAACGAGATGCTGGGCCATCACCGTGCTTACAAGTGTACCGGTTCTGAATTCG  
GCCAGCACCTCACCGGTCGGGATCAGCAAACGTGAAAGCGGCCAGTGTCCGGGCCAG  
AGCGATAATAGCAAACAAAATACCGCGAGTTTTTGGTTATTCGAGCGGTTTTCTCCGCAC  
CTCGCGCTCCGAGGACCACTTGCAATTCCAAAAGGATCCGTCGATGAGCGCGGTGGAC  
ATTGACATTGACGATGACGTCACGTCCAGCCTAAACACCCTGTTGGACACGAGGCCTG  
ACAGCGGCCAAGGTTTGTCCAGCGAGAGGATCGTCTGGACGTACAACGCGCCGGTCA  
GCTCGCCATCAGCCTCGGAGCGCACCTCCTGCTGCCAGAATGGCAGCTCTTCGCAATC  
CTCGTCGAGTAGCTCCTCGACCGAGGGAAGTAGTCCCCAAAGATCCTTATCGCCAACT  
TCCCCTACCTCGGTCTCGTCCTCCGTCATGTCTCTCAATTCTGGATCCCGTAGGTTCCCA  
CCGCCGGTACCCACGGGCACCACACCGTCAGCCCTGGGACCCTCCGGCGACGGAACC  
GCATCCTCGGCCTCCGGCCTTCATCCCACCAACGGTGACCTCAGCCAGTCCGAGGCGA  
TCAGCAACATGTCCAGTCCCGACTACAACGACGAAGAGACTATGGACATACTGAGTGC  
ACGCGATATCATGATGGTCAGTGATCCGAGTGACAGTGACTCGACGATACTCGCCAGC  
GAACCACCTCAGAGGAGGTTGAAGGCAGCTGCTGCGGCCACCGTGCAACAAACGTCG  
AACGTTTATGCATCAGCACAGGAAAATACCGAGCATAGGATAGTGATACAGGTGAAGG  
GGCCGGACAAGGACATTGCGGTGGCGAGGAATACGAGTCCAAGGCAGAACAGGAGA  
CGGGGAAATCTCGGTAATCCGGAACCTCGTAGCCACGTCCACCGCACAGAACATCGTGC  
AACGTCCGCCCAGCAATAACACCGCTGGGAACGTTACGCCTGAATTCGTTGGGTATCA  
G

>novel\_circ\_001937

ATCCTGCAATAAAAGCTCATGTTTCGTTCGGTTATTGTACCTGGACAACCGGTATGTGAC  
GAAACGGATTTCATCGAAGATATCTCTCGAGGCAACAACACCTGCGAATAACCCTAGAA  
CAGTGTCGTCTGGCAACGGAGAGGGCACGGAACCTAAGGAAACCTGGAACGCCAGAA  
CTTCCGGGAGGTTCCGCACAGGAACCAACTGGAGCGACACAATATGCGACCAGAAGC  
AATGGATCCTATAGTGATGCCTCTGGCTCCTCCGAGTTAGAAGCACTACTTCCACCAAT  
GGATAGTTTCAAAGAAGAGGAACGCGCACAAATGGGAGCCGCTTTCCGGTGACAAGTT  
TTCCAGACAGAAGAACACGCCTAGGTTTGAAGCGTATATGATGACCGGTGACCTAATG  
TTGAACCTGTCGCGCACCCAGCAAAGCAGCAGCCTGCTCCCGAAGCACCAGAAGAAG  
GTCGATTCCCTGAGGTACAACAATCATCACACCCACCATCACCATAATCACCACAATCA  
CCATCATCATAACTCGGTACCCACCAGTCCTAACGAGATGCTGGGCCATCACCGTGCTT  
ACAAGTGTACCGGTTCTGAATTCGGGCCAGCACCTCACCGGTCCGGATCAGCAAACGTGA  
AAGCGGCCAGTGTCCGGGCCAGAGCGATAATAGCAAACAAAATACCGCGAGTTTTTGGT  
TATTCGAGCGGTTTTCTGTCGCGACCTCGCGCTCCGAGGACCACTTGCAATTCCAAAAGG  
ATCCGTCGATGAGCGCGGTGGACATTGACATTGACGATGACGTACGTCCAGCCTAAA  
CACCTGTTGGACACGAGGCCTGACAGCGGCCAAGGTTTGTCCAGCGAGAGGATCGT

CTGGACGTACAACGCGCCGGTCAGCTCGCCATCAGCCTCGGAGCGCACCTCCTGCTGC  
CAGAATGGCAGCTCTTCGCAATCCTCGTCGAGTAGCTCCTCGACCGAGGGAAGTAGTC  
CCCAAAGATCCTTATCGCCAACTTCCCCTACCTCGGTCTCGTCCTCCGTCATGTCTCC  
AATTCTGGATCCCGTAGGTTCCCACCGCCGGTACCCACGGGCACCACACCGTCAGCCC  
TGGGACCCTCCGGCGACGGAACCGCATCCTCGGCCTCCGGCCTTCATCCCACCAACGG  
TGACCTCAGCCAGTCCGAGGCGATCAGCAACATGTCCAGTCCCGACTACAACGACGA  
AGAGACTATGGACATACTGAGTGCACGCGATATCATGATGGTCAGTGATCCGAGTGACA  
GTGACTCGACGATACTCGCCAGCGAACCACCTCAGAGGAGGTTGAAGGCAGCTGCTG  
CGGCCACCGTGCAACAAACGTCGAACGTTTATGCATCAGCACAGGAAAATACCGAGCA  
TAGGATAGTGATACAGGTGAAGGGGGCCGGACAAGGACATTGCGGTGGCGAGGAATAC  
GAGTCCAAGGCAGAACAGGAGACGGGGAAATCTCGGTAATCCGGAATCGTAGCCAC  
GTCCACCGCACAGAACATCGTGCAACGTCCGCCCAGCAATAACACCGCTGGGAACGTT  
ACGCCTGAATTCGTTGGGTATCAG

>novel\_circ\_001939

CTTTCGTGAAGTTGCGATTTATGTTAAATTCTCACTCTCGTCACTTGAAAACTCACTCTC  
TCACATTGAAGATCTTCAGCTGAAGATAATGAACCTTTGCTCTGAACGGATGGAGTTCTT  
TCGGAGTTCAAATGCTTTGCTAAATACTAAAATGCCATAAATCGATTATCGTATCGCTTA  
AGATATGTGATTAAAAAGCTTTCGATTGAAATCTTTTCTATTTTGAAACATTAAAAAGAAA  
GAATTCGGATAAATTCTACATGAAGAAAAGATAAACTATGTTACACAACATACAGTATT  
AAACTTGAACTGAATTAAAATAACCATTCATCATTAGAAGATTAATGATAAATAATA  
GTTTATATTTAATGCATTTAGAAATCTTAGAAAATTTAGGAATGAATTTCTATTTTGTATT  
CCGAATTTTGCTGTCTTTCATTGCTTAAATAGTTTTTAAGCATAATAAAATATAAATAT  
ATATATACAAATAGATATATATATATATAATTATAATGTTATAAATACTTAAAAGTCTTAC  
TTAAATATTCTATTTATTAGAAAAATATAGTATTTTTTTATATTTTCATCATAGTATCTTATTC  
CAATTTCCAGTCAATTGTATTTTATAGATTAATTTTTTTATATTAACTTTACTAGAAATATT  
TTAATATTGACTAGTCTTAGATATATTTTAGAATATGTAAATAAATTATTTATTAGATTTATA  
AAATTATTATTATAATAGATATAAACTTCTACAAATACAATAAATATTCTTTAAATTGTAAT  
ATATATTCTTTAAATTATTATTATTATAACAGATATAAAGTTCTATAAACACAATAAATATT  
CTTTAAATTATAATATATAAAATATATTCTTTCGTATATACAATAATTCAGTTTATGATGATA  
GATCCAAACTAAATTTTTCTTTATTTATAAAGAAGTTTTATTTATTAAGAAATCTTTATTTA  
TAAAGTTTTACATATTTTTATATGTATATAGAGAATTAAGTTTTGAGATATAAAAAATCGG  
TCAAGATTTCAATATGCTCATATTGCCAAAAGCAAATTGACTTCGGCAATAATCGGATAC  
AATTAGTTTGTACAATTATTAAGGTGATAGCTTGATAGTATCCGATTCCCTTGAAATTGTA  
TTGAAACTTTTAGAATTCTATCTTACTCAAATATTTCAAATTTATCTCGAATGTTCAATT  
TCTAATAACATTATCCATTAAATTTGTTATTACATATATAGAATTTTTTATTCAAACCTTTTC  
AAATCTTTTCTTTCGTTATTATTGTTTCACCAAAAACCTTCTACGAATTAATTAATACAAG  
AGCAAATTTCAAAGAAATCAGATCATACTTTCGGAAAATATTTTATATATACAAAAATA  
TTAAATTTTTTTTTTTATGTAATTAATTATTGAGGAAAATTTAGTTTTTTGATCATCCTTTG  
TATATAAATCATAAATAATCACGAAAGTATAAAAATAAATTCATATCAAGAACATAAGTTT  
ATTGAATATAAATCCGTTAAAATAAAGAATATAAAACAGTTTAAACCATCTGACAATAAC  
AAACCATCGAAAAAATTAAAGAAAAAAGGAATCGTCGAAAGCAAGAGATCAGGAGG  
AAATACGTACATACATGCGCTTAAGTACATGCATACATACATATCAAGAGCAAATCGA  
GTTCTCCAGATGTTCTCGAGACGAGAACATTTTCGCCGTCTGTCTCGAGAAAACAAGA

AAGAGACGGAGCGAACGAATAATTTAAGCGGAGAAAGAGAGAGAAAGAGAGAAAGA  
GAGAAAGAGAGAGAGAGAGAGAGAGAGAGAAAGACGCGTGCAAAAGTGAAACGGAAGCA  
GAAAGAGAAAGAGGATACTGGAAGGAAGGAGAATATGCACCGTTTGCCAGGTATATAC  
GCTTACGTCCCGCCTCGTTGTCATTAATTAATCTCACGTGATAAATGTTAAGTCGTCTGC  
CAACTTCGAAGATGTTAACGCGATCCCGCGCGATGGCCCAGCTGCGTGCCACGATTGA  
ATCAGCAACGGGCGAATACTGAGACACCGGTGGCAGATGTTGCTGCATAAATTTCTGTT  
AATCCTTCGTGGCAACGACCGGAATCGTTTGTCCCATGGCGCCCGCGAAAGATCGATC  
ATTGTAGCACGTAGATGCGCCGATCGATGAAGATTAGTTTTATTAGATAAATTTTTTCAA  
TTTTTTTTTTGTTTTGTTATAAACGATTTTCAAATTTCTTATGTCTTATTACTATTATATAA  
TGATAAAATATTGTTGAAAAATATTTTTAATATTAATCTCATAATAATGTTATTTTTTTTCGA  
TAAATATTTTATTTTTTAATGACAATTTCTTAAACTTCTTATTAATAAATAATAAATTAAT  
ATTAACTTTTAAATATTCAATATTTAAATACTTCAATTATTTAAATTTATTTCAATAATAA  
TTAATGAGCTTCGTTCTACGTACTTTAGATACATCTTTTTCTGAAAAGTTCTTATCTCTGT  
CATTGAATTGTACTTCCAAACAAAGGGACTAGGATTTAAACTATCTTCTTAAGATCTAAA  
TAATCTTCTCTATTATTTCTTTTCTTTTAAATCTGTTCTCCAACAATTTAACATTTTTTTC  
ATCTTTATTCTTCTATATATATAATAGATATGTTTCAGATAAATATCAAAAAATTGAGATTAA  
AATACATCAGTTATTTGAGAAATTAAGTGATCTAAATTATTGATAATTTCTTTCTCAATTT  
CTTATAAATGACATAGAGAAAAAGTGTTTATATTTTATTTTACGATGTGTATTTTAAAGTTTT  
CAAGAAATATATGTCTCAAAAATTGAAATTGCATTTTTTAAGAATTGATAATAATTTCTTT  
GAAAATTAAATAAACAAAATATGACAATTAATACACTGTAAGTGCAATTTATTCCATTTTC  
GAAACATTAAAAGTACAATACAAAATATGACGATAATCTTTCTATCGATAGTTTCACAAT  
TTTCAAACCTAACTCTTGTATTTTCTCGAGCACTAAGAATTTTTGTTAGATTGAAAAACA  
GAACTGATCACCATAAGAAAATAGAATTTACGATCTCCAAAATCGTGTCTTCTTTGT  
TGAGACAAAAGAGTTAAAAATTCATTTCAAACCTCATTATCATAAATCGAGCCTAATCG  
AAAAAAAAAACATAGATGAAAAGAATTTTAAGAAGGAAAAAGAAGAAAGACAATGA  
AGAAAGAAAGTAAAAGAACAGTTACCTGTGACTAGGATAGGATCAAATTTAATATAATA  
TATCTAAATCCAAATTAAATCTAATGCTAAAGTTGATTCACTTCGAATATTTATTTAATAT  
GTATTTCAAATACTTCTAAATATTCGAATATTATTGATTTTTATTAATATTATTATTAATAT  
GAGTCTATTTATTCTTGTCAAGATGTATAAAGATTTGCATTTAATTTAAAAATGTTGATTT  
AAAAATCTAATTAATGCTAATTTAAAAATTACGTTTCTATTAATCTAATTTATGTATTA  
TATAAATAATTTTATGAAAATTATTTATACTTAATCTTTATATATATTTTAAATGTAGAA  
ACGAAATAATCTATTGTTTTCTCAATATTTATTTACATCTTTTTATTTTTTATATATTTTATA  
TATTTTTTTAAACTCATATAAATTAGACAAGACTTTTTTTTCATTCTCAAAATTTAATCTTC  
TTAATCTATCAAGTTTCATTAAATTTCAAGAAATGTATTCTTACAAATTATTCAATTTTTT  
TCTAATCTAATCTAACTTATTCGCGATATAGTTAGACCATCGCTACTCAGACCAACCTAA  
CCTAGCTCTTTTACGAGGTAGGTACGTTCTCGATGGACTTTTCTCGTAGTCACGAAAAT  
AAATTGAATCACGCAGAAAATAGAAGTACAAACACATCCACGCCTACCGATGGCCGTA  
ATTCCAAGCTACTTTCCAGGTTGCGATTGCAGGGAATGGTGGGGGCGGAAAGAGCCG  
AGTTAAAGAGGGGAGAGGTCTTCCAACCTTGACATCCTGAAGTATTATCTATCTCGGAA  
GTTTCGTCCCCGAGGCTGCGGCTGACTCCGTTGACGATGACGAAGACGACGAGAACGG  
TCACGCTAATCGCAGCTGGCTGGAGATTGGCTTTTAGCACAGAGTTCGACCAACTTGTA  
TCGCCAGGAAATCGCGGGCGCACCCCTCCGCTCAAATTTACAGGGCGATTCCCTCGAC  
CGCCCCCTTCGTGCGGAGGGATGGTATTTGCGGCCACGGGGGAAGCATTGATGGAAGG  
GGTTACGATCAGGTCGACGTGGTCTCTAGCGGTGATTTAAATTGCTCTAGGCGAGGGCC

TCTGTGCACTTTAGTTTCTGGCTTCTTTTTAGAGATTGTTCTTTAGAAGTTTGGTGGTTG  
ATGAGGTCCTTGATGGTATACAGGTTGTAAGTGGTTTTCTTCATTGTTTTAGCTTTATACA  
TTTTTCTTTCAGGGATGACTCGAGATTGGATTATTAGATTGAATTGAAATCATGTGAGA  
TCTTAACATTTTTTTTTTAAATTCAAAAATATTTATTTTTCTTCTTTCTTTTTTAAGAAAA  
AAGATTTTCTTCTTATGTTTATTAATAATAATAATCTTAAAAAAATTTGATTGATCTTTGAA  
TTCGCGTTTTTATGATATTATAATAGTAATAATAGTAATAATTTGTTCTTTTGGATTATGAA  
AAATTAAGTATTTATTTTAAATGTGATATTATATTAATAATAATATGAGACTAAGCAATTATT  
ATAAATCTAAATCTAAATACAAATTTTTTACTTTTAGTTGATTTTATTTAATAGATTACAT  
AGAATCAGTGATATTCTAATCAATGAAGTTATATAATAATGTAATAAGTTATAATAATGTAT  
TATAGTATTAATGTATTATGTATTATAGTAAAAAAATTTGTAATATTATAAATGTATTCATA  
GATATCAATACTAAATTTTTAAAAAATCTCAAATAATATGAGAAAATAAGGAAGAAGTTTA  
TAAATCAATTACTACATATTCTAAAAGACATTTTTATTGAAAAGAAAATTTATTCCAATT  
AATATTTTTTTTTTAAATGTGTAGAACAAATTTTTTAATTGAAATATCATTTTAAAAAGAAC  
GAAATCAAGATTCAAATTTTAATAAATTTTTATATTTTTTAAATATAATTTTAATAATATAA  
AATGGAAAATTTTAAATTAAATAAAATATTTAGAATTTAGTGTTTATTATAAAAAAATTC  
CAGATAAAATATTATTTGAAATATGAAAAAATATTGAAAAATAAAGGAATATTGAAAC  
GGTCTTACCTTTAAAAAAGACTTCTCATCAATCACAAAATTGCACAAAGTAATATATTTT  
ACATAAATATAAATTTTCATTGAAATCAAATTTTTTAAAGAAGATGAATTTTTCTGTAATA  
TATTTTCATAAATTATTATATAAGAAAAATAATTAGCAATCAATGAAATTAAGTGCATTT  
CATATTTTCGAATTGATATTATTCCTTTTATTTCTACTTCTTTTTATTTCATTTTTCTTTTC  
ATGTATTTTCGTAATAAATTATATTTTCATACATAAATTTAAGTAATCTCATGTGATAGATAA  
GTAAAAATTGTAATAGGCTGAAAATGTAAAAGTATTTAGAATTTTACAGAACTTTTGAA  
TTGTTATAAGAATTTTTTTTTAAAGCTATATTCATATAACTTCAAATGTTAAATTATAGAAT  
TATAGAAATTTAAATATTTAAATATAAGATAATACATTAATTTGTTAGAAATTTAAAGAAA  
TTGAAAGAAGAAAAAGAATAGATATTTAAAACAGTAATTCTCAACTTTAATTAATATATT  
AATTATAATTAAATAATCTGTGATATTCCTGTATATTTTTTATATAAGTTTCATTTAATAAG  
ACAATGAAATCATTTTTTTTTTTGTTTCTTGAAAATAAATATTTACAATATAAAAAAATTCAA  
TCAAATAAATAGATATTTAAATATTCATGATAAAGTTCTTATAAAAAAATATCGATTTCTT  
AGAAATTTTATAATCTCTTTAAAATTATAATTGTAGATAATAAGATAAGAATATTAATATAA  
ATACTGTTTAATATTAATTTAATTAATATTAATATTCATATATTGAAAACCTTCAATTTGCA  
ATTAAATATTCTTACACAATTTATTATTTCTATAATATAGAATTTATATTTTTTCATATTAATCT  
TCTATATTATTAATTTATTAATTTTAAATATTGATACACCAAAGATGAAGAATTTTAATCAA  
TCATAAAATTGGAGGAAAGAAAATTTAGCGAAGAAATTAATCAAGAATATTTTACATGG  
GAAAACGTAACCTCAGACGTATTGGATAGAGTTTGAGACACCGAAGATGGCATTTTAC  
ATACTCCAGACCCGCGTGACTCAGAATGCCAATTTGAATATGGTTCAACTACATTTCCCTT  
GAGTTAGCATGTTTCCCCGGGAGACTGGTGGAAGGATGTCTACAAGTTGCTACTCATTT  
ACATATTCCTCGGACCAAGAACTCTCCTTCGTCGCCAGCAGGATTATTTGCGGAAATTG  
TAAACGTTTTTCGATTAACGATTCAGCCCTGTTACAGAG

>novel\_circ\_001940

CTTCTGTAAAGTTGCGATTTATGTAAATTCTCACTCTCGTCACTTGAAAACCTCACTCTC  
TCACATTGAAGATCTTCAGCTGAAGATAATGAACTTTGCTCTGAACGGATGGAGTTCTT  
TCGGAGTTCAAATGCTTTGCTAAATACTAAAATGCCATAAATCGATTATCGTATCGCTTA  
AGATATGTGATTAAAAAGCTTTCGATTGAAATCTTTTCTATTTTGAAACATTAAAAGAAA

GAATTCGGATAAATTCTACATGAAGAAAAGATAAACTATGTTACACAACATACAGTATT  
AAACTTGAACTGAATTAATAAACCATTCCATCATTTAGAAGATTAATGATAAATAATA  
GTTTATATTTAATGCATTTAGAAATCTTAGAAAATTTAGGAATGAATTTCTATTTTGGATT  
CCGAATTTTGCTGTCTTTCATTGCTTAAATAGTTTTTAAGCATAATAAAATATAAATAAT  
ATATATACAAATAGATATATATATATATAATTATAATGTTATAAATACTTAAAAGTCTTAC  
TTAAATATTCTATTTATTAGAAAAATATAGTATTTTTTTTATATTTTCATCATAGTATCTTATTC  
CAATTTCCAGTCAATTGTATTTTTTAGATTAATTTTTTTTATATTAAACTTTACTAGAAATATT  
TTAATATTGACTAGTCTTAGATATATTTTAGAATATGTAAATAAATTATTTATTAGATTTATA  
AAATTATTATTATAATAGATATAAACTTCTACAAATACAATAAATATTCTTTAAATTGTAAT  
ATATATTCTTTAAATTATTATTATTATAACAGATATAAAGTTCTATAAACACAATAAATATT  
CTTTAAATTATAATATATAAAATATATTCTTTTCGTATATACAATAATTCAGTTTATGATGATA  
GATCCAAACTAAATTTTTCTTTATTTATAAAGAAGTTTTATTATTAAAGAAATCTTTATTTA  
TAAAGTTTTACATATTTTTTATATGTATATAGAGAATTAAGTTTTGAGATATAAAAAATCGG  
TCAAGATTTCAATATGCTCATATTGCCAAAAGCAAATTGACTTCGGCAATAATCGGATAC  
AATTAGTTTGTACAATTATTAAGTGATAGCTTGATAGTATCCGATTCCTTGAAATTGTA  
TTGAAACTTTTAGAATTCCTATCTTACTCAAATATTTCAAATTTATCTCGAATGTTCAATTT  
TCTAATAACATTATCCATTAATTTGTTATTACATATATAGAATTTTTTATTCAAACCTTTTC  
AAATCTTTTCTTTCGTTATTATTCGTTTACCACAAAACCTTCTACGAATTAATTAATACAAG  
AGCAAATTTCAAAAGAAATCAGATCATACTTTTCGGAAAATATTTTATATATACAAAAATA  
TTAAATTTTTTTTTTTTATGTAATTAATTATTGAGGAAAATTTAGTTTTTTGATCATCCTTTG  
TATATAAATCATAAATAATCACGAAAGTATAAAAATAAATTCATATCAAGAACATAAGTTT  
ATTGAATATAAATCCGTTAAAATAAAGAATATAAAACAGTTTAAACCATCTGACAATAAC  
AAACCATCGAAAAAATTAAAGAAAAAAGGAATCGTCGAAAGCAAGAGATCAGGAGG  
AAATACGTACATACACATGCGCTTAAGTACATGCATACATACATATCAAGAGCAAATCGA  
GTTCTCCAGATGTTCTCGAGACGAGAACATTTTCGCCGTCTGTCTCGAGAAAACAAGA  
AAGAGACGGAGCGAACGAATAATTTAAGCGGAGAAAGAGAGAGAAAGAGAGAAAGA  
GAGAAAGAGAGAGAGAGAGAGAGAGAGAAAGACGCGTGCAAAAGTGAAACGGAAGCA  
GAAAGAGAAAGAGGATACTGGAAGGAAGGAGAATATGCACCGTTTGCCAG

>novel\_circ\_001941

AGCCTGGAGGAGCGCGAGCGCAAGCACGCCGTGCACAAGGAACAGCTGTCCCGCGA  
ACAGAGGTTCCCTGAGACGACGGCTGGAGCAGCTGACGAACCAGACGGGCCTGCACG  
GGTTACACGGCCTCCACGGCCTCCACGGGCTGAGCTCGAGCGCCCCGACCGGTTCCCTC  
TTGCGGCCCCGGAGCCGCCGCGGCTGCAGCTCTCCTCTCAAAACGGCGCAGCGTTTCC  
GAGTGCTCGCTTGGCACGGCCTCGTCAACCAGCTCCACGGCCAGCTCCAGGAACTCC  
GACAGGTCTGCGGGCAGTCCCTCCGTCTCGGAGTCCG

>novel\_circ\_001942

AATGTCAGCTGTCCATTGAACCGGTTCCACGTCAAGGATGGAGAGACATGGTTACACG  
AGAACTTTGTCCATGATATATTTGCGTAACGTTTCACGCCTCGACGAGTTTTTCATTCCGT  
GGACGCGTGTGTATCGCGTCCGCCGAAGTAAGTTCGGCCGGCCCTTGACGATTTGCA  
CGGATGAAACGGTCCTTGTCGCGATAATCGAGGTTGGCTGGAACCGAGGTTGTCGCC  
GATCCACGACTCGATGCTTGTAATTAATTTTCGGTCGTTGTTGCCGCGTGATTTAGTAGCC  
TCCGGTGGCCATGGATGGCTGATGGTAAACTAATTGCAATTACTGTAATTACCATGCGT

TGTTAACTGCGAACCTCTGACGAGGTTTTTTTTCTTTTTATAGGTCTTTTTTATATCTCA  
GGGAATTTAAGAAAATTGATTTTGAGATATATATGTATGAATTGAATTAATATGAGAGTG  
TTAATTTAATTATTGGGATTTTATATAATGGTGGAATAATTGATTATTGGATTATTGTC  
TTTTTTTTTTAAACAATAAGATTGGTAAGTTTATTAATATTGGAATTGTTATGTATGATTTT  
TAAGGGAGTATTAAGGAACTTTAGGTAAAGGAAATTTAACGTAATCTAATTTAATCTCTA  
GTGATTTTCACTGCACAGTTTGTATAGGGAATTTGATCGTAAAAGATATTTAGATATTATT  
AAAGTTATATAAAAAATTAATTTGATTATTGAGATTTTTATGCTAAAAAAATATTATGGAAT  
ATTTCTAGAAAATTTTGTTAATCTTCTTTTAAAGAAGATTGATTATATATTGCAATTGCAAA  
ACTAATGTAATTTAATTTAATCTCTAATAATTTTTGTTTAATAGTTTATTTAAGAAGTTTAA  
GAAAATTGAGAAATATTTAAGATTAAATTTATGTAGAGATTAAATTTAATTATTGCAATTTT  
TATGTATAGAATTAATTTAAATATTGCATTTATTATAATTATTGTGATAATTGAATCAAGTA  
ATATAATTTATTATTTATTTTTAAATTAATTGTGTTTAAACAAGTTTTGATTTTTTTTATCAT  
TTACTAAATATAAATAGTAAAACAATACAAAATATAATAAAAAACAATATAAATAGTAA  
AAACAAAATACAAGTTTTAATTTTAAAGATAATTATGATTAATGTCTATTTAAAATTCATA  
TAAATAGAAGCAATTACTATTTAAATAGCATCAAATAAAAAATAATATGTTTAATCCTATTT  
TCCTTTTTCAAACATATTTTGTATTCTTCTAAATAAATTATAAAATGATTAATAAATAT  
TATTTTAAATCTTTTATCATTCTTTATATAAAAATTTATTTCAATATAAATATTTTGTACAAT  
TATAAATTTATTTTAAATATATAAAAAAAGATATAATAAATTATTTTAAATTTTATATATATA  
TCGTGATTTATACAAATAATTATTCOAATAAGAAAAATTATAAATAATAACCAAAGTAATT  
TTAAATTAATATTTGAAATAAAGAAAAATAGTTTAATTGAATTTAATTTATTATTTGAAAA  
ATTTTTCATATTTTAGAAAATTAACATTTTAGAAAAAATTTCTTCCCAAATCCATTTTA  
TCCAAATTTTTTCTATTATATAAGAATATAATTAAATTATATTCTACGTACGAAAATCATC  
TTTAAACATTCAAAGAATGTAAATTTCCAGGATAATAAAAACTTAAATAAAATAATA  
AACTTCATCTTTTATTAAACCCTCGTGAAAAATATTAATTTTATACCAAACCTTCGTCAA  
ATACAATGTTCCCAAGTATCCACGAGCAGAAAAGGGTCTTCTTTATCAGTTCCCTTGAT  
AAAGTCTCGAAACATAAAATTTCTGCCACTCTTATTAGCAAACCTTCTCAAAGTATGTT  
ACCCTATAAACTTCAACGAAGAATTATCCCCCAGTTATATCTTATTCCTTAAAAATCGGT  
GAAACTTTATTCAAATTATCGAGGAGGACGAAAAGTTGAAGCGAGCCAATTTTCAAC  
CGGATATCCGTACAAACTCGTAATCATCACCTTATTCGGTATTACGGATGGACGATGGAT  
TCTTTCAAGGGGAAATTTCCACGGTTCGAAACGTTTGATTAAATTTTTTTTATTTCGACG  
AGACGTTGCACGTCACACAGGTATTGCAAATTTGATCACGTCAACCGTGCGATCCAC  
CCCCATAAGATATTCAATTTCCAGCGATCGGATTTTCTCAGATGAACGTTGATCAAATA  
TTTCTGCGCCGGTCAATATCGCACACGATGGATTTTCTTATTTTCGTTTACACTTTTGG  
GATATAATATTTTCTTGGGATATAAAAAATGTAATATCTCTTTTGTTTTACTTCTTTTATGG  
TTTATATTTCGGATTGAATATTGTTGATTAAAGATATATTGTTCTATTCTGAACGAGATGA  
GTGAATTTATGCAGGATTATAATTTTAAATTTAATAATATCATTTTAAAATTATAAAAGTGT  
ATTTTATAAACTTTAGCAGACAAAAGTGTACAGAAGATATCTTTCTATTCTCAAACAATA  
AAACGTTTTATTGTTTTTCTCTATTTTCTTATTTTACGTGTTGACTTTGTAAAAAA  
AAATAGTAACTAGACAAAGTTTTATTAGATATTTATGAAATATTTTTAAAAAATCAATTC  
AAAACGTCAAAAAAATATAAAAAAGTATATACAAAAATATTAGTTGAAGCTTATTTAATAA  
GTTACAGGCAATTCATGTTTCGATTAAATGAAACGAGGCGGGAAAAAGTCTTATTTTAT  
TTTCAATTTGCTTTCTCTAAAGGAAAGTTCAATAAACCATCGAATAATGAATTAATTTTA  
TTGAGACCAACTTTTGTTTTTATTTTAAAAATCGAGTCATTAAATATATCTTACAAATATT  
GTATATTGTTAAAAAATGGAACAAATATTTTATATAAATATATGTACATATTATTTGGTATT

GATAGTGACACAATTTGAAAAATTTCAAATTTGCTTTTATTAAACTCAAAGTTACAAATT  
TTAATAAATCTTTTCCTAAAATTTTCGATCTGTTCCGCCATCAATACAGCTATATGCAAAAT  
TGGAATACATTGGTTTCGAAAACACTGAAATTATCTATAAAGTACTGAAACTGTAGAGG  
ACTAAACTATCGTTTCGTCCAAGGCTGTACGTCAGAACTAGATTCTTCGTCGTGGCCGC  
TTAAACACGGAACCCCTTTTCCTAAATGGCCGTGCATAACAGCGTCCCGCGGGTAGAA  
TGCATCCATCCAACCCCGGAAACCGTCCACTCCGCGGCCCGCGAGACATAATACCGTT  
TGATGACATCATTAAAGCCGGAGCCGGGCTTATTGTTTTCTCATAAAATCGTACGTGCAAA  
CGCGCATCCTCTCTCCACCGTCTTGTCGTAATGTTTGGACGACGATGACGTAGCTGGC  
CGAGGCGAAGGACACAGGCGTCGTTGTCTCCATTTTCCACGACGGGACAATAAACCG  
GGTATAAAGTTATAATTAATGGCTGTAATGGCGCGTGTGGCCACACGTGACGCGACA  
CGGATTATTATTGCTAGAAAGGGAATAAATCTTCAAGCGTCTGGGACATGCTGTGTAGG  
CACGTTGATTTTTTTTGGGGTTGTTTTTTGTGGATTCTTATTTTCGTTTGTTCCTAAT  
TTTTAATAGAAACGAACTAAATTTGGATTGTGAATATCTTATAAATTAATTAGGTTATA  
AAATAAATATTGCACTTTGAGAATTGTTATCGCGGATTTTTAGATGCTTTTTTAATGGG  
AATAAATAATTTTGATATAAATGAATTAAATTGGATTGTATAATTAATTGGAATAGTG  
ATGCTATGTCGATTTTTTAGAAAAATTAAGGGATGTTTTTTGCTGATTTTAACATTTGA  
ATCAGAATTCATGCTTTTTAATTTTTAATGAAAATAAATAATTTTTAACGAAAAGAAATT  
AAATTTAATTTGTATTTTCTTTTCTTTTGATTTTAAACTTTTTGAATAAACATATAAA  
TTCTATCAAATACAAATTTTATAAAAGTTATTATTCATATTCTTTTAAATATTTATTGAT  
CTAAAATTTTATTCGCTGAAATAAAATATAATTTCAAATTCATTCCAAAAAAAAAATGTT  
ACAAATTATCTGTTCTGATTATTTATAAAAATTCCATAATCACGATTATTATGTTTTATTGA  
AATTTTAAATTAATAACTTGTAAGTTAGTAATTAATAGATTAGATTAGGATAGG  
TAATTTATCTTAATATTTATTTATATATATAATGTGCAACTATATTTTCTTAATAAAATAC  
AATATTTTACTAAACACTTCTATTACATCATTTTTAATAATCATAAAAAAACATGTGAAAT  
CATTTTAACGAATAATTCTAATGTTAAACAAAAATTATATAAATTGTACTACTTTCAAAA  
GTCATTGTCTTACAATTTTCTACTGATTTCAAATCCTTTCTATTAAAAATAAACTCAAA  
AATCTTCAAACAAAAAAACTAATCTAAAACCAACAACAAAATTTCTAATTTTTACT  
ATTTTTTAAATATTGTACTTCAAAATCTTAAACAATAATTGTATAAATTCTATCAGATTAT  
CTTTTAGAAATTACTATATGGTTTCCATTCATTTCAAACCTTTTTCAAAATAAACTTAA  
GAATCTTTGAACTATATTCAAAAAAAAAAAAAAAAAACAATTCTGAGCTTCGACCATTAC  
AAATATTCCACAATCATGACTATGTTTTTATATTATTTAAAAATGATAAATGATAAGTAA  
AAAATACAATAAAAATACAATTTCAAAAACCATCAAAATAAATATCGTATTACTTCAAAA  
TCTTAAATATTCTACCCTTTTCAAGAAATCACTATCTCGCATCATTTCCACCGAAATAA  
AACTCAAAAACCTTCAAACTAACTATAATCCCCCTCCCCCTCAAAAAAAGATCAAGC  
TGGCGAAATCACCACCACCGACCATCCTCTCTGACCCAAACTAAATCTCTCCAACCGT  
CGAAAAAGGAAGCGACCCCGGCTCGCCGCGGACACTCCCCACCCAATAAAAAATAA  
TCGCCATTGGGGTTCCCCGCTTTGGTATTCCGGTTGTATGTTTATCGCGCGATTTCGTTCA  
ACTAATGGGCCGTGATCGCCGCGATAATCGGGATCTTATCGCTTTCTTCCGGACACTTTC  
GCGGCGGCCAACTCTGGCGTGTAGACACTCCATGCGACCCGTGGTGTAAGCAGCCGAT  
GGGGATAACCCGTTCAATTTCCGCCGTCTGTTTGCCGGCTGGATTCCGCTCCATTCGTT  
GGTGGCCGTATACGTGACGCGAAAAACGAATGCCGCCGCGTGGTTTCTTCTGGCCT  
GGTGGGTAATTCGAAAACCTTTCCGGAGAAGACGAATCGAGTCCGCGTGAAATTGGCC  
GCCATTGCTCGGAACGGTGATATAGGTGTGAGTGGGTAAAATGTTGCACGTTTTGTGCA  
CGTTGGTTTCGGATAGTTTTAATAGTTCCTTCTGTGGGTATTTATAGTTTGTAGAATCTTTT



TATTGAGAAATTTATTTATTTATTTATTTATTTTAAACGAAGTAACGATTCTAATTTGCTT  
CCAATATTTTAAAAATTGTGAAGAATTTTGTTTTTCTTTTGCAAGAGATAAATAAATA  
AATAAATAATAAGATAAATGAAGTATTGAAATAGAGGATCTTGAAATAAGAAGGTAA  
GGACAATTTTGAATATTATTATAGTAATGAAGAAAAAATTGAAAGTATATATTTTTTTT  
TCAATTAGAAAATAATTTCCAATTTATTATTTGAGAAGAATTATTGCATGTTTTTAAAGT  
ATTGTGAGATAAATAGTAAAATGAAATTTGTGAATATTAATTTTACTATAGATAATAGCAA  
TATAATTGAATAATTTGAAAATAAAAAATTCTGTAATAAAAAATTCTTGGATCTATGATAATT  
CTTTTGATGAAATAATTATATTTTCTTTATTTAAATAATTTTATTTTTTGAGTTTTATTATAA  
TATATAAATTGCAAAAGATAATAAAAAAATTTTATTATTTTGTATATATAAATCTTAGTT  
TATAATTTATATAGTTATATAATAATAAAAAATATACATACTTACACTTTATATGTTTAAAT  
AATAGGAATTTTGAAGATTGAATTTATTATAATAGGTAGTTGCCAAGAATAGACATTAAG  
ATTTGTAGTTAAAATTAATTGGTCATTATGATTAACTATAAAAATGTATTATACCTTAAGAT  
TATGATATGCAGATTATGATATGCAGATTATGATATGTTAAAATTTAATTAAGATTATATTT  
TGTATTATTATGTTAAAACCTTTAAAAAAAATTGAACATATTATAATAATCTTTAATTATA  
ATATTAATTTTATTTTTCTAAATTTATATTCATGTTAAACAATTCTAATACTCTTAAACATC  
ATGCATATATAAGAGATTAAAAAAAAGGAAATTTTTTACATTTTAAAGAATGAGAAATTT  
AAAATTCTTATAATTAGTATTTAGAAATTAAAAAAAATTGTACATTGCTCATGTATT  
AAATGTTTGATGCATTTTTTGTACAGGAGAGCTCACCTCAGAAATTGCCTTGAAAAGT  
TGAAGGTGTTGGTCCGTTAGGTCCGGAAACCTCAAGACATACCACGTTGGGCCTCTT  
GACTAAGGCCAAGCGTTTTATCAAG

>novel\_circ\_001943

ATATATGTGTAATGCAGCAAAACGAAATATAACAATAGAAAATACAAGCAGAATTATAA  
AGCGGATAACAATTAATTGTCAACATGGCGGATAGTGATTTTCTCATTACAATTCAGGT  
CCTGCTTTATCATTATTGTTTTACGAAAATGTTTCGTAGTAGCGGGGACCAGATAGGCTTT  
TACTAGGAGAAACACTTGAATTTACATAAAAACTTATACAGATTTAGATAATCAAGT  
AGAAACAGTAAAAATATATAATAACATTGAAGCTGTTGTAACCTGTCCATTGCCTCATAC  
ATTACATAATTCTCTTGGCAAAATTAATAAAGAGAAGTTAAAGGACTTTTTACGTGACA  
AGAGTAAACAAGTGATAGGTTGGTTTCATTTTAGACGAGATGTAAGCTTGGTGCCTACA  
TTCAGGGATAAATTATTACATAAAGAATTTGCCTCGTATTTTTGTAATGACAATGGTTCTA  
AAAATGAGTTTTTTGTTACTTGTGTTGTTAAGTTCTTCAACAAGTAATGAAGGGGGA  
TATAAATTCAAACATGTCTTCTTAAGATATAAAAGAGGAGCATTTGAACCAGTTCCTT  
CGGATAAGTAACTTAGGAAGTAATTCATTTGCACATGAAGGTTTCAGATTATAAACCTAC  
TCCTACCAAAAAATCATCTGATGTTCCAGATATATTTACTAAATTTATAGAATCTTTAAAT  
TTGGATTTAACAAAGACATCTGCAGTTGAATCTGCTATCAGTATACAAAAAGCAGCTGA  
GCAACATTTGAGTCAATTAATACCAGAATTATGTAAATCTGATCTTGAAGTAGCAGAGC  
TTGAAAAACAGGTTAAGGAATTTATGTTTAGCAAAAAGATAAAAAATTAATGGTAGTCAA  
ACTTATGAAGTTAAAAAAGATGAAATTAATGAAGGAAAAGCAAAATCAGAATCTTCAG  
ATGAATCTTCAGATGATACTTATCAGGAATGTCGAACCAGAAATGTAGATCCAGGAATG  
TTCAAGGATCTTCTATTGCAACT

>novel\_circ\_001944

ATATATGTGTAATGCAGCAAAACGAAATATAACAATAGAAAATACAAGCAGAATTATAA  
AGCGGATAACAATTAATTGTCAACATGGCGGATAGTGATTTTCTCATTACAATTCAGGT

CCTGCTTTATCATTATTGTTTTACGAAAATGTTTCGTAGTAGCGGGGACCAGATAGGCTTT  
TTACTAGGAGAAACACTTGAATTTACATAAAAACTTATACAGATTTAGATAATCAAGT  
AGAAACAGTAAAAATATATAATAACATTGAAGCTGTTGTAACCTTGTCCATTGCCTCATAC  
ATTACATAATTCTCTTGGCAAATTAATAAAGAGAAGTTAAAGGACTTTTTACGTGACA  
AGAGTAAACAAGTGATAGGTTGGTTTCATTTAGACGAGATGTAAGCTTGGTGCCTACA  
TTCAGGGATAAATTATTACATAAAGAATTTGCCTCGTATTTTTGTAATGACAATGGTTCTA  
AAAATGAGTTTTTTGTTACTTGTGTTGTTAAGTTCTTCAACAAGTAATGAAGGGGGA  
TATAAATTCAAACATGTCTTCTTAAGATATAAAAGAGGAGCATTTGAACCAAGTTCCTTTA  
CGGATAAGTAACTTAGGAAGTAATTCATTTGCACATGAAGGTTTCAGATTATAAACCTAC  
TCCTACCAAAAAATCATCTGATGTTCCAGATATATTTACTAAATTTATAGAATCTTTAAAT  
TTGGATTTAACAAAGACATCTGCAGTTGAATCTGCTATCAGTATACAAAAAGCAGCTGA  
GCAACATTTGAGTCAATTAATACCAGAATTATGTAAATCTGATCTTGAAGTAGCAGAGC  
TTGAAAAACAGGTTAAGGAATTTATGTTTAGCAAAAAGATAAAAATTAATGGTAGTCAA  
ACTTATGAAGTTAAAAAAGATGAAATTAATGAAGGAAAAGCAAAATCAGAATCTTCAG  
ATGAATCTTCAGATGATACTTATCAGGAATGTCGAACCAGAAATGTAGATCCAGGAATG  
TTCAAGGATCTTTCTATTGCAACTAGTCAAAGTACTCATAAACTTAGAAATACAATGTAT  
ATTGAAAAGAATATTAACCAAAACAAATTAAGAAAATCATCTACCACAAGCATAATAAA  
TAGTTCCAGTCAGGAACCATCACCATTTCTAAATTCAGAAATAACAGAAAATGTATTTA  
GTAAGAGTAAACGTCTTTCCAATATGGAATCAGAAATTGTAAAAGAATCAAGTTGTAAA  
AGTGACACAAATATGAGTGGTATTGGACGAGGTAGAGGCAAATCAATGCACGATGTTT  
ATTCAGGATTAAAAAAGCTAAAAGGACTTCAGGCTCAGAATCGTCTGAAACAAATAG  
TGTACAAAATACTTCTTTGCAAACTTATAGTCAAGTTACAAAGAAAAAG

>novel\_circ\_001946

ATGGACAAGAGCAAGTGGATCCTCAGAAGCAAGGTGTAAAGGATGCAAGTGCTAAAG  
CTGCGAAACGTGCACTGAAGAAAGCTAAGAAAGAAGCCAGGAGGAAAATGCTCGGT  
GGTGTTCGCTGCGAGATCTCCTTGCAATGGATCACCAAG

>novel\_circ\_001947

AAAAGGTTAAAATCAGTCCATCCTATTGGAACAACAGAGTTGATGAGGGCGATTTCATC  
GGCTAACGCCACGGAACCAACGGAGGAACGGATGGAATCGACAGATTGTGACAGCAA  
TCCATCAATGGCGTATTGCGCCACACCCAGGAGACTTAGTAGTTTCGTCCGTGGAAAGC  
GCTAAAATACCGGAAGAAGAGGAGAAAAAACATTCGCGGCAGCTGATTGACGATG  
AGGCCGAGAACGGGTCGTATACCTCGAAAGAAACGATCTGTAGGATCTATGGAAGATT  
TGTGGGACGAGACCGTGTTTGAAGATCCAACGAGAACAGCGAGGACCACTCCGGTGA  
TTAAGATCTCTTTCGGTGCTCAAGGCGAGGGAACCGTTCTGAAGATACCTTCCAAAT  
CCAGGATCCGGAATATGAGCAGGAACTGATGATGCTGAGGACGTGCAGACGGAAAC  
GGAGAGAGATCCACTAGAATTGCCGAGAAATTTTGATAATGATTATGATTATCGTGAAG  
ATGGGGAAGAAGATGGACAAGAGCAAGTGGATCCTCAGAAGCAAGGTGTAAAGGATG  
CAAGTGCTAAAGCTGCGAAACGTGCACTGAAGAAAGCTAAGAAAGAAGCCAGGAGG  
AAAATGCTCGGTGGTGTTCGCTGCGAGATCTCCTTGCAATGGATCACCAAG

>novel\_circ\_001948

TTATAGAAATGTGCAAGAAAAATAGGAAACGGAAATTAGAAGGAGATGATCAGTCAAT

GGTCGACTGGGAACAAGAGAATATTTTTCCAGAGGAAATAAAAAATGAAATGGAAACT  
ATGTGGGAGATTCCACAAATATTTTCATTTCTTCATTTGGCAAAAGAAGCTTTAAACATA  
CCCCATTTGTCTATGTATGAAATGGAACGAATGCTTCTGATACCAAGAGCTTCTAAACA  
ATTGGCAAATATAATGACATCCTTGTTAAGTTCTCCATAACAAAAGCAAAATTGAGAA  
AAATACCACCAATGCCGTACGAATTTTGGACAAATATCCTTGCTTATAAAATGAAAAGT  
TGGTTCAAAATTTACGAAGCTAAACACCAAAACGCAGTAAAAGTTTTAGAAACTATCG  
GCGTAGAACCGGAATTTTGAATGTTTTTCTGATGCTCCTCTATTGAATGGAAAAGAT  
TTTGAAGAAGTACTTTTAAACAAAAAGTTTGGCTTTTGAAAACAGTCTGTGATACAG  
TTATG

>novel\_circ\_001949

TTATAGAAATGTCTGAAGAAAAATAGGAAACGGAAATTAGAAGGAGATGATCAGTCAAT  
GGTCGACTGGGAACAAGAGAATATTTTTCCAGAGGAAATAAAAAATGAAATGGAAACT  
ATGTGGGAGATTCCACAAATATTTTCATTTCTTCATTTGGCAAAAGAAGCTTTAAACATA  
CCCCATTTGTCTATGTATGAAATGGAACGAATGCTTCTGATACCAAGAGCTTCTAAACA  
ATTGGCAAATATAATGACATCCTTGTTAAGTTCTCCATAACAAAAGCAAAATTGAGAA  
AAATACCACCAATGCCGTACGAATTTTGGACAAATATCCTTGCTTATAAAATGAAAAGT  
TGGTTCAAAATTTACGAAGCTAAACACCAAAACGCAGTAAAAGTTTTAGAAACTATCG  
GCGTAGAACCGGAATTTTGAATGTTTTTCTGATGCTCCTCTATTGAATGGAAAAGAT  
TTTGAAGAAGTACTTTTAAACAAAAAGTTTGGCTTTTGAAAACAGTCTGTGATACAG  
TTATGCACACTAGAAAACTGTGCAAGAGGAAATAGCCAAGCAACCATGGGAAAACC  
AATTTGAAACTGTTCTAGGCACTGATCGTTATGGAGCAAGATACATTTATTTTCTCAGT  
TTCTTAAAAGTGATTTGAGAATTTATAGACATTGTCTTGATAATAAAATTCTATCCACAGT  
AAAGCCAATCAAACCTAAATTA AAAACAGAATTAGAAAACAAAACATTAAATGAAAAT  
GATTCTGTGAAAAAGAAAACATAATATAGAAGAAGAAAATCTCGATGGAGTAATGGAT  
TACCTCCAAAATCAAAGAAAAAATAAGTAAATGTGATGACAAAGTTGTAAATGATTG  
CAAGTGCACTAGTGACAGTGCAATAGGCTCTTTGATAAATGAGGATACGAATTTTAGTA  
GTACAAGCACTTGTAGTAATAATAATAATAGCAATACTAATAATAATAATGATAA  
TAATAGTAATAATAATAATATCAACTTAGATATTATCAATGTCTGAAAGATTGAGAAGT  
TCGTCTGAAGTGTTCTGAAAGATGCATCCCCAAAAACATGCTGTAAAAGCACAAAATCAA  
GTGGTTACGATACAAGCAATTCTAATCACGTCATTTCTGGTAAGAGATTATCTCAAAA  
ATGTTTAAAGGATTTTCTGACAGTAGTAATAATGTAAATGTGATATAGAAATAATCAAC  
GGAATTTTGTCCAATCTAAAATCGGAAACTAACGAAGAAAAAGTAACAGATGATAATG  
ATATATCTTTAACCCATGCTTCGAAAAACAAATTA AAATTAATCCGACAAGACAACAA  
TATTTAGATTCAATGGATCTACAAATAAATAAAGATAATCCTGTAGATAGAACAATTGAT  
AATTTATCTACCACTTCAAAAACAGATGATGAAAACTAAATGAAATTATCAGTGCAGA  
AAATTTAAATTAACGATAAAAGTTCAAATGATATTCATAATGTAAGAAAAACGCATC  
AAATATCGATTGTATCAAAATCTGATGATGAAAAATTAATGAATCAAGAACTCATACTT  
ATAACCAAGGAGATAATGTAACTTTTCTGAAAAAAAACAGGAAGCAGAGTTCTTAG  
ACAAAATGGAAAATTTAAAGAACAGAAATCAGATAATGAATCAGATCAAACAAGTAAA  
ACAAATGAAATAGAATCATTTGATGATAAGGATCTTTCTTTGAGCGAATTAAGAAGCAT  
GCTACAGAAGGAAGCAATGGAAGATGATTTTTCTTTCGATGAGAGTAGCGAGAATGGC  
AAATATAATCTTAGAAAATTGAATAATAAGAAAACAAATGATTTCGAAACAGGAAACAG  
ATGATTTTAATGTGATGCTCTTGGAAGTCTAGTACTTCGAAATTTCAACTTGTAGCTGATA

GTCTTAATTCATTGAGAGATCTTATTTCTTCTTTTTTCACAAAAAAGTAATAATCCAAGTA  
CTGATACAGATACTGATGCTGAACTTATGCCTCCCTGTGAAGTAAAATTAGTTAAAAAA  
ATGACAGAATTATTAACGTCTTTGGAAGAAATAGAACCAGCTTTACGAGATTCAATGAA  
AAGAGCAAGAGGAAAACCTTCAAAAAGAATGGACTAATTTTAAAGAAGGCAGTGC GGA  
GGATCAGGACTCATCTGGGGAGGGTCTCGGCTCTAATTGGTGGGTCTTTGGATCGCAG  
GGCTATCAATTGCCAACTTCAGGAGACGCAACGTTACAAACGTTACCGCAACTTACCG  
TATCCTCAGCTGGCTCCCAAAACATCTCCAATAAAAAACGACGAAGAAATCATTAATGC  
ACAGAACACAGTAAGAATGTCGAACAAGAATGTAAAGAACCCCAAGATGAGAATTCA  
CAAAACGAAATACAAAGAGAACAACTCTGAAAGAGACGAAAGTAACACAGCTCAAGA  
AAACACAGGAACTGAAGGAGAGACAAAAGAAGATTCAAGTGAAGAAGAACATCAAA  
CACGAAGAGTCTTACGAGCCCGAGGCGTTTCTCATACACAGAACAATTTTATTTCAGA  
CGACGATATGGAGGAGAACGAGCTGGAGGAATGGACCGACTTTGAGGCCGTGTACGC  
GGTCCCAGCACACAGACCAGTGCATCCACTCCACACTTTGGTCCGAAAGTCAGATAT  
GCTGACGATAGGACAAACGAGGAGGAGGACTCAGACCAAGATTGGATTCTACCAAGC  
TCTCGCAAAAGGAAAAATAAACGTCCGT

>novel\_circ\_001950

GCATGAGAGAACCGAGAGACGATTGAGGCACAAAAAGGAGGCGAATCCACCCCCCAT  
GGAACCACCTCCGCAACTACTGAATAATAATTATTTGTACATCGACTTAAACATGAACTT  
CAGTGAGAATACTAAGCAACAGACTACCAAAACAAAAAAGTTTCAATTGACAACAATC  
CATTTCCATACTTTCTAAAAGATCCAATTTCTACAAATCCAGTTTTTAATAATCTAACCAC  
TTATAATCTCAACTTCAATCCATTTCTTTACTATCCAAAACATCCAACCTCTATAAATCAAC  
TTTTTACGTAACGTACTACTTACTCGACGAAGTGGAGCCGCAATAAGCACGGGGGGAC  
GATACTTGCATGACAAGACCTTGCGGCTCACCACACACTATGTCCAAAGACCAAGACA  
CTCATGTTACGCCTATGTGTGTTGTCACGGCGTCGTGGATCCGTCTACGGGGATCAAGA  
AGCGCGGAAAACCTCGTCTCGAGGTTGGTTAATGCGCGAACAACACCTTCTTGTGGAG  
GGGTACCATAACGCTCCTCCCTTCGTGTCTCCTTACATTTTTATATGAGCTTTTAGTGC  
GGTATCGTGC GTGGGATCGTTAGTGTGCGGAATGATTCCCTCAACTTTTTTTGTTTTCAAT  
TATTTTATTTTATTTTATTTTTTTCTTTTGTTTCTTCTTGTCTGATGCTTTCGTATAATACG  
CGCGGAAGTGCGTGCGAATGATGGTGGATGTTTCGAGGTGGTCGATTGAATCCTGTAG  
ATAAAAAGTTATTTCTTCAATTCTTAGAGATTTCCTATCTATCATACAGACATTTTCATTAT  
AGAATAGAATTAGAAATTAAAAGATGTTTCTTCAATTACAATTTCTTTATTTATATAAATA  
GGATATTCAAAAGAACATAAAACCACAACATTTTCCTTCATTATATAAATTTTTTATCACA  
ATATAATTAGAATCAATGGAATAAATAATATTCTCTAACTACAAGTCTCCCATTCATCAAA  
ATACATTCTACATAAACAAAGTATCCAAAAAATAGTTATCCAAAAGACTTTCAATTGT  
CTTTTCAACTGAGACTTATATACATAATATACAACCTTATATACAAGTTTTCCATTACATAAC  
AAAGATCAGAATTATATATATCCAGAAGATATTCCTTCAATTATAAATCCCCTATTACATAT  
GTATGTACTTACATACATGACAAATCATTCAATAGACCATCCACCGAACTTAGAAGGCG  
TTCCTTCCCCTATCCATCATAGATATATATCCGTTTCAGATAGGACAGACTAGCCGAGAAA  
TAGAATAAGAGAAATAGAGGGGGGAAACGTGGCGGATTATCCGTGGTGGCCGACCGGAT  
CGAACCTAGAAAGGCGGTTGTTCTAAGGTTTCCACGCCGACTGTAGGAAGCCAGCCCG  
TGGACTGGCTCTCGAACCCGCCAGAGTGAGAATCGTGACTCGTGGATCGTTAAAAGAT  
CAAGAAAATCGACTTGTTCCTACTCCTACCCCATTAATCTGGCCCCCTTCTACCCCGGAT  
GGATCGGAACGAGAGCGCAAACGAGGGTGGAAGCTCGCCGGACACGGTGATCGCGC

GCTCCTCGTCCGAAGAGGAGCGGAACAGGCTCGCGTGCAGCACTTCCGGCGAGTACG  
TGA CTGTGGGCGATAGCAGTTCCAGCCTGGACACGGTGACAAGCGTTGGCACGACCA  
CCGTCTCGACCACCACCGACGCGACCGCCACAGAGGACAAAAAGAGGGGCAGATTCG  
GCGCGTTGAAGAGCAGCTTCCGCAAAGAGGGTGGATTGTTCAAGATTAAGAAGAAGA  
GCAGGCAGCTGGACGAGCCGGCTGCCGAGCTTCAGCCGGATGTCGAGGAAAAAGAG  
ACGGATCGCAAGCAGAGCCCGGTGGAGGAGGAGGATGATCGCAAGGGTGGTGGCTCG  
ACGACGACCTTGAAGAAGAAAAAGAAGAAGTCGAACTCGCTGGTACGCAAATTAAGC  
CTGAACAAATTTTCGCCTGTCCACCGAGCAAGAGCCTAGGCACACGCCCCGAAGGTGGT  
GATAACAGCCGTCCACAGAGCCAATCGTCGCAGGAGTCGCCTAGTTTCTCGGACAGTT  
CGTCCGGGATCGGGAGGAAAAGGCAGGAGGTTCGAGAGGGCTCGGCCATCGCGACGGCT  
ACGAGGCCGTAGAACCCTCGTACGACGTGGACAGAGAGAAGGGAGAGCCGAGGAAA  
CCGGAGAAGCAAGAGAACTGGTGAGCAGCGTGACCGTAGTACAGAGCAAGTCGCC  
GTCGTTTACCATCAGGAGCTTCAATTTGACGAGTGAGCACGATTCCGAGCAGAAGTCA  
CCTCGACCGGAAGCGCGGTGCAGCTCGACGCTTCCGTACGCAATTTCAAATGGTCGG  
AGCAAAAGGTCTCGAGATCAACCTCGAACGAGCCGACTAAGAAACCCAACTGAACA  
CGAAATCCGAATCGGAGTCCAGTATATCTAAATCCTCGGTCCGCGAAGTCAGGCGGAA  
GTTGTCTGTTGTTGGAAGAGAAACGCGCAATTTTTCAACGCCGTTTGTTCGAGACTTCT  
CAGGACTCGGATTCCGGCGAGACGGTGATCGCCATTACCCCTTGACGACGAAAAACAAA  
ACGTCGGCCAAGGAGGAGGAAAATCGTGTGGAACAGAACAAAGAAGAAGAAGGC  
CAGGCATATTAGCGTGAAGAAGTTCGACACATTTTCCACGTTTGAGGGGACGTTTCGAC  
GAGGAGACAGGGATTGGTTATCTGGCTGGTATCGAGGAGGATTACACGGAGAGTTACG  
AGAGGCAGCGCGATAATTACGTGGCCAACATGGGGCCCATGATGGCCGACAACGCGAT  
GGAGAAGAGCAAGGTCAGCCAGGAGAGCATG

>novel\_circ\_001951

GAATTAAAATCGAAACCCGGAAAACTAGTTCCTCTTCAATGCGATCTTTCCAACCAGA  
ACGATATCTTGAAAGTCATAGAATGGGTCGAGAAGAACTTAGGAGCTATAGATATTCTC  
ATTAATAATGCAACTATTAATATCGATGTACACTGCAAAATGATGAAGTGTTAGATTGG  
AAGAAAATTTTTGACATAAATCTTCTTGGACTGACTTGTCATGATCCAAGAAGTTCTGAA  
ATTAATGAAGAAAAAAG

>novel\_circ\_001952

AAAACAAGCACAATTTAATATATCAAGGAATTCGCAATGGAACAAAATTGGATTGATAA  
AGTTGCTTTAGTTACTGGAGCTAACTCGGGCATTGGCAAATGTCTAATAGAATGTTTAG  
TTGGCAAAGGAATGAAAGTTATTGGAATTGCTCCACAAGTCGATAAAATGAAGACTCT  
TGTTGAGGAATTAATAATCGAAACCCGGAAAACTAGTTCCTCTTCAATGCGATCTTTCCA  
ACCAGAACGATATCTTGAAAGTCATAGAATGGGTCGAGAAGAACTTAGGAGCTATAGA  
TATTCTCATTAATAATGCAACTATTAATATCGATGTACACTGCAAAATGATGAAGTGTTA  
GATTGGAAGAAAATTTTTGACATAAATCTTCTTGGACTGACTTGTCATGATCCAAGAAGT  
TCTGAAATTAATGAAGAAAAAAG

>novel\_circ\_001953

AAAACAAGCACAATTTAATATATCAAGGAATTCGCAATGGAACAAAATTGGATTGATAA  
AGTTGCTTTAGTTACTGGAGCTAACTCGGGCATTGGCAAATGTCTAATAGAATGTTTAG

TTGGCAAAGGAATGAAAGTTATTGGAATTGCTCCACAAGTCGATAAAATGAAG

>novel\_circ\_001954

AAAAAAAAAGAAAACAAGCACAATTTAATATATCAAGGAATTCGCAATGGAACAAAATT  
GGATTGATAAAGTTGCTTTAGTTACTGGAGCTAACTCGGGCATTGGCAAATGTCTAATA  
GAATGTTTAGTTGGCAAAGGAATGAAAGTTATTGGAATTGCTCCACAAGTC

>novel\_circ\_001955

TACAAGTAAAAAAAAAGAAAACAAGCACAATTTAATATATCAAGGAATTCGCAATGGAA  
CAAATTTGGATTGATAAAGTTGCTTTAGTTACTGGAGCTAACTCGGGCATTGGCAAATG  
TCTAATAGAATGTTTAGTTGGCAAAGGAATGAAAGTTATTGGAATTGCTC

>novel\_circ\_001957

GAATATTCGCTCCAAAAATCTCATTCCCTTCGTGTCTTCCGTATCACTACATTGAGGCCCA  
TTAATCGTATCGCTTCTTCGGTTTTCGTTCTTGCCCTTCTAATTACACTACTCAGATTCGTG  
CAGCACCTGGGAACATCACGTAAGTCTCTCTTTCACGAGACTCGATTTACACAAATCTT  
TTTTTATAACAATCTATTTACCATTTTCAGGATGAAAAGAAAAGAAAAGATTCTTGAAA  
AAACAATCCCAACCTCCAATATTCCTAAACATTTTGAATCGAAATCATTAATTAATCAAT  
TAATTGATTAATTAACAATCTCTCGTGTAATAATTTCTTTTCGAAATATCCAAAAAAAAA  
AAAAAAAAAGAATCTATAAATGGCGCGAAGAACGAATCCTCGAACGAATCTTTCGCCCG  
TTCGAAATCCACGCCCGATAAAGTGGGCCCCGTGCACACGAACAAATCGTTTAATCCG  
AGTCGGGGTCCCGATCGAGGTAATGACGGCCATAAACTGCAGCCACGGAAGGGTGCA  
CGAAACGAGGCGGAGGAGCGAGCGAGAGAGAGAAGGCGAGGGATTCTGGGCCCCGAG  
CGGAATTAGGCCTGACAGGCGAAATGGGCCTCGTGGTCCCGGGCCACGTATACCTGAC  
TCCTCTTTTCCTCTTCTCCTCCTTCTCTCTCTCTCTCTCTGCTCCTCTCCTCCTTCTCAA  
CCCGTCGCAACGGTTCGGTTCGTGTCCCTCCGCGCGCCGTTTCTCTTTCTCTTGTTTTCT  
CGGACGGACGTGCAACTCGGATGCCACAAGTCTGCGATCCCAGATGGAGGATCCGGTT  
CCAGGAATCGAGCGTGTAACATCGGTTAAAGGCGTGCTTTCCGACCGGGAATCGAT  
GGGAAAACAATGGGCCGACAGCTCCTAAAGTGTCTGACAAATGTTCCGCGCGTGTTGC  
CCATCCGGGGCCTCGAACCTCGCGGATTCTTTTTTTTTTTCCTTTTTTTCCTAACTTGCGAA  
AAATTTGGGTGGCGTTTCGAGGATTATACACGTGGACGATAGTCGAGCCGTGGTGTTT  
TTTTTTTTTTTTTTTTTTTTTGGAAAGGTGGAAGAGGCTTTGGAAAAGGTAAAGAGTGGA  
AATATAAAATTGTGGAAAAATATTGTTCCTTTTAGGAAGCCATTTTAAATTAAGGAAGTT  
TTGAGTGAAATTGTTGAACTTACGACTGCTATTATAGGATGAATGTTCTTCAATGTTTCT  
TTAATCTGGTTCAATTTTTGAATTTTAGAAATCCTATCGAATCTTGGAATTTCTTCCAAG  
ACGCAAAGTTCCAGCATTGGAAAACCTTTCGACGTATCGTCATCCGCGATTGGCGTTTCC  
AATAAGTCAGCGTCCACTAGTCGGGAGTGTTTGCATTTGAATAACACGCTGGCCGACA  
CGAGCTTTTTTCCACGAATGTGTGCCGCGAGATAAATGGACAATCGGGACGTGGACCAC  
CGAGCAGACAGGGTAAGCAAGCTCGTAAAGTCGAAATTAAAGCTGGATTAACAGGGT  
CGATCCATGGATCGAAGAATCGATTTTTCTCTTTTAAAACGTGAAATTCGCGAGAAGA  
AATCTTGATTAATTCTTCGAGCTGCAAAATGAAATGGAAACACGTTTAATTTTTTAATAA  
ATGGAATATTATACTTGAAGGACAATATTATAAATTCTTGAAATCTAATTAATTATAGAAT  
TAATCTAATCTATTATTAATTAGATATAATTCTTGAAATTAATTCTATAAATTCATTTTGTTGT  
TTAATGACAAATATAATCCAAAATTTAAATAATCAATCCTTTCAATTTTCCAATTTACCTT

GACTTTTATATTACATCGCATGATCGAAATAATAAATCTCTTGAGCACAAGTTAATTTATA  
TTTTGGATTATTATTATCTCTGATATCTTGTTTAATTATCCGATTAAAAAATTCAACAAAT  
CCGTGAGATTTAAAAACGAGGGGAAATTAATCACGCGAGAAGTAAGTCGATATAAGAA  
GAAGTTGGAACGGAAGCCGAGACTTTTCCATTCCCGGAAGCCGACAAGCGTATCAA  
GGGTCAAGCGATCCGCTTCGAATCGAGACACAAATCGGGTGTGGAATGGCGGGTCTTT  
CACGGTAGGCTGAGCAACATCGAGGAAGACGTTGGCCGCGATATGATTAGAGGCGAG  
AAGTTGCGGCAAGATCGATAGCGGGACGTTAACAGTGTGGAAATCGCGGAGGCCTGCT  
ATTTTCCATCCTTGCTTCTGTCATCGAAGCGCTACCACTACAGCTTTCCGCTCATCGGCG  
CCTGTTGCTCAATGATATCGATATCGAGTAGAGATTTATCGATCCTTCGTCTTTTTTCCC  
TTCTTCTTCTTCTTTTAAACGATTTGTGAAACTCGCGTGGGGATTATATTTCACTCGTTTG  
TTGATCAATATTATTTTCGCGCGAGAAAACTGTTATTATTAAACGAAAACTGTGAACAAA  
TTTGTGATTAATGAATTCTATCCTCCATTCTTTTTCTCCTATTCTTAAAATCTTTCGATCGA  
TATTTTATTTTCATTGATTTATTTATACGTGTTGAATCAACAGCAAGTTTGAAATTGATGG  
ATTCGTGTTTCGTTTCGATATCGATTAATATTATTTCTGTGTAAAAATTATTTTGAGAAAA  
ATATTGTTATTCGAATTTCAGAAGAAATCGAAACGAGAATAAGTAAGAATTCCTCGTTT  
CCTCCATTCCACCCAAAATCGTTTGAAAATCTGGTCTCACAGTCAGTCAGTTCAACAA  
ACTTTCAGCAAACATACCCACTCTTTCTCTCTCTCTCTTTCACTCCTTTTTCTGTCT  
TCTCTCCTTGTAACCTCGAGCTCTGGCCATCCGAGGGATCGAAGTCACCGGGGAACA  
CAAATTCGCGTGTCCCATCTAATACCATAAATCTGTCATCCGGCGGCGGGGGAACAAGC  
TCGTTTGACTCGCGTGTGCTTTGTGCGGTGTGGAACGCGGCGGAATTCGCAATTTAGGCTC  
GTCGCCGTCCGCGCGTGTAGAATCAGTCCAATCGAGGGGATCTCCGTGGAGGCGCA  
ACGGTCCAACCCGCGAGAAAGAGATAATTCTTTAAAGGGGATCCCCGGTTGTATGCCT  
GGTATACTCCTCCTCCTCCTCCCCCTCCTCCTTTCTCTGTCTTTTCGTTCACTTACC  
TCCTTCTGCTCCCTTTCCCCCCCCCCCCCTAGTAGTGGCCACAAGGTGTTCCACGGG  
CAACGTGGAACGTGTCGACCTTCTGCCCCACACCCTTCTCTTTCCCTCGAACACACCC  
CCGACAATATTGTAAACAAAATGGTACCAGTATTTTCATTGGTAACCCGACACCCCTTC  
GTTGAACCCACACGCATCGCCTTCTGCCGCCTCCTCGTTTTCTCTTCCACTTTTTCTCC  
TCTCTCGTACCTTGTTCTTTTCTATATACTCGTTTTTTCTCCTCCTCCTCCCCCTGA  
CCGACTTGTTTGGCTCCGGTTTGAGATTTTGCACGATTCGACGATTTTCGAGGGTTTCG  
GATATTCACGTACGTTGTATAAGTTTTTAATGTATATATATATTATTGTATTTAAAATTAG  
GATGAAAAATACGAGTACGAAGATGTTAACAATGTTAATAAAGCAAGTACAAAGTGTTT  
ACAACGCTTTGCAAAAAATTTAGGAATCCAGGTGCAATTATGTAGTAAACCGATATCGA  
GAAATCCTATTGTAGATAATAAGGAAGTAGTTTGAAATGTCTATATACGGTTGCCAGAAA  
TCGGGCGTGTTCGTTTTGATCCGAGCATAGAACTAGTTTGGAATAATCATTAGATCC  
AAGATCCCCGTGGTTATCTACGTGAAATTTCACTCCGATCAAAGAACTAGTTCTCTAG  
AAGAATTCGAAAACACGATCACGGAACTCGATGGTAGAGAATCCCGTGCTAACACT  
AATCTTAACAATCAAACGAACAGTCGAACAACGCTCTCTGTACTTTTTACCAATAATGA  
ACTGGCTTTTTCCGCGGGGAAAAGAACTGGCTCCATCTGTAATGTACCATTCCAACCT  
CTAAGTACGCTCCACGGCCAAATAAACTCATACGTCGCTTCGATCGCAACACGTCAAT  
TAACCGTACTTTTCGCCGTGGATCCTATCACCTGGTGTTACACGCAAAAACGAGAATTGT  
AAAGTCCAGCGTTGAAACCAGCCGTCGAATACAATCTCCACGGTTCACAGGTAAATCG  
TTCGACAAGTATGATTACCCGTTACGGCAAAAAAAGCACGAGCAGAAATCGCATTAA  
CAAGCTCTTAATAGCGGCCGCGATCGCCATCGGAACAATCAGACCGTTTCTTCGACTCC  
GTGTTATTTTCTTTAAGAAACCATTCCTTCTCGAAGTGAAAAAGGAACGAATCGAG

GAAAAATATCGCGGACGGTTGTTCTGCGGGAGCAACGTTGGTGTACGGTAGAAATGC  
AAATTCGAGGGAAATCGAGGCTGGAAGAGGTTAGCTTGGCAAACATATAGTTATGTTG  
GCCCAGGTTATGATAGGTTTCGCGTGGCTGGGCCACATTAGACAGATCCACGGATCGAG  
ATCTCGAATTGTAGAAATTCCGATTCTCGACAGAGAGATGATACTCGGTTATTAGGCGT  
GTAACGCTCTTCCAAGTCTCTTTTCCTTCGCTTTCTATACGATCGGCCGGCACGGACTTC  
TCTTGATTACACGATTCGTCTTACGTATATACCGGGCCTGGATCGTTTTTCAGATTGTAAT  
TCCACGGATTTCGATTCTCGACCAGTCGAGAAGAGGGATCGTAAGAGGAGGAGAGAAA  
ATTACGGGACATCTTTCTTTCCGGATTTCGCGACTGGGACAGGGAGCATTAAAGAGAGTT  
GGTGGAATTCTTCGATCGGATCGTGTTTCG

>novel\_circ\_001958

GAAGGATGTCGAAATCGGGAAGTATCAAGGATGGCGAGAAAGGGCCATACGACCCGG  
TTCCAAGTACAGACAAAGGCAACGATGAGATCAAGCTCGAGGCAAAAATGTCTTTGTT  
GAATGGAATCACCGTGATCGTCGGCTCCATTATTGGTTCTGGCATATTCGTTAGCCCAAC  
TGGTGTCTCAAGTACACGGGAAGCGTGAACGCGAGTCTTTTGGTGTGGACAGCTTCC  
GGTATTTTCTCCACGGTAGGGGCTTACTGTTACGCGGAACTTGGATGCATGATCAGGAA  
GTCAGGCGCCGATTACGCATATATTATGGAACTTTCGGACCTTTCCTCGCATTATCAG  
GCTCTGGGTTGAATGTATGATAGTGCGGCCTTGACAGTCAGGCCATCGTGGCCTTGACTT  
TCAGCGTTTATGTGCTGAAGCCTGTGTTTCCAGATTGTGCTCCACCAGATGATGCTACG  
AGAATACTTGCAGCCTGTTGCATCT

>novel\_circ\_001959

ATCTAAATGTGTTCCATAGCGATACCAGCTGAATTGCTTCTGGGGCATAGTCCCCCAGT  
GTATAGCTCGCTGTTATACAGTCCCTTGGTGGTAACGGCACCGACGATTACAAGCAGGT  
CGGTACCACCCAGAATAAGGCCATGCCTGTCATCTGGTTCCTTGGCTATAAACAACATT  
CGAAACAGTAATGATGGTAGTAATAAACAGAAAGAGTGGTGGTTTGCCGATGATC  
GTGGCCGTCCTCTTACTCAGGTACGTGTGATGTCGGAGCCTAGTAACGTACCACCTTTG  
TGGAGCACAGCTTACTTGGCCGGATTAAACAGGGCGGCTTTTAAATTCGAAAATTGAGA  
ATGAACAATCCATAGAGCTCGTGTCACCTTGGCAAGTAACTTTCCTCAACCGGCGAG  
CGATTATTTAGCCTTCCGTCAGAACTTGATCAGGAGAATGTCAGCTTGGAACCGTGA  
TAGTGAAAGAGTCGGAACAGTGTCTAGTAGGTACCATCAAGGTACGTAATCTGGCGTAT  
GACAAGGAAGTCGTGGTCAGGGTGAGCAACGATTCTTGGAAGACACACGAGGACGTT  
CATTGCACTTATGTGCAACAACCGGGCTCTCCGGCCCTGATCCTTTACGATACCTTCCG  
CTTTCGATTAACTTTACCATTGAAGTCAAATGTGATAGAATTCTGTGTACGATATCGAAC  
CGATGGAAAAGAATATTGGGACAACAACGAGGGAAAGAATTTTATCGTTAGAAAAAA  
GTTAGAGCCACGAGCACCAACCAACGATACGATATTCTGACAACGTGCGATGGCTTT  
TCGAAGAATAATAATCGAGACAGTATACCACGAATCACAGATGCGACCAAAGCGAACG  
TACGCACGTGGAGCGAGTTCGCATCCTGGCAGCATCTTGCGAATGATGCTCCATACTGG  
TGAATCTTCGTCACTGGTCACAAACGATGTACGAATGTCGTACGAATTCTTCCAGTCTA  
TTTGGTTTAAACGATCACAAGATAGTAGACTATGCGGGACGAGGTGGCAATATATCTACG  
CGACGGCATGCATAAGATTGTCGAAAACATTGTCGTGTAATTTTATACGCGATAGCGTA  
CAAGTGTATGGACATCAAGATCAAGGGAACGCAGAAGAGAGCAATGACGATAGAAGG  
GAAGCGATGGACTGTGATTAAAGTTCAAATTATAAAAGGACATGCTTATTGAACGGAAG  
AAAGAGAGACATAATCAGAAGTCGATAGCGCGGAACAGGCGAGAAAGGAGGCACTAG



TCGCGTTACATTTATG

>novel\_circ\_001960

AGGCGACGAAGCCGGTCCAGCGCGGGATCTTGGGATCAAGACATTCGGATCAGGACA  
CCCTCGAGTCGGCGAACAGGTGAGCGTATCCCCTGTAAGGAAGGTCCTCCTCGCCTAT  
GGAGGAGGACCGTTTCTTCCGGTAATGGTGGTGGCCGACGTCCTGCGCGTACACCACG  
TGGTGGCCGCCGCCGCTCTCGTGCCCGCTCGCCAGTTTCTTCACGGCCACGATCAACG  
AGAGCATCAGGGCCAACGCGGACACCATCAACGCCTTCATGGCCAGCAGACCGAGAG  
CGCCGAATCCTAGCGCGGCCATCATCTTGCCTGAAAATCGCAGAAATAAACAG

>novel\_circ\_001961

GGAGGACTGAAAGCGGCCATCCTCTCAGACGTTATACAAGGTTTGACCATGATCGGTG  
TGTCGCTCGTGATAATCGTGAGAGGCTCCGCTGATATCGGTCCCAGTCAAATTTTAAAC  
GTGACGTACGAACGTGGCCGATTGGAATTCTTCGACATGAATTTTCGATCCCACACTTCG  
AGTGACGACTCTGTTCGGCAACTCTGGGTCAATTATTCATGAGCCTGTCCATCTTCGGTT  
GTCAGCAGAACTTCGTGCAGAGATATTGTAGCATGACCAGCGAGAGGAAAGTGATCAA

>novel\_circ\_001962

GTTCAAGTCGAAGCTAGTCAGATGCCTCGCAAGCTTCTCCTACGTGATACGAAGCCTG  
CTGAACTTGCCGTACGATATTCACGCCTTGCGTAGCTCTTAAGGCTGTGATTGGCCT  
GCCTTACTGGGCCAGTATAGTCGGCATTACATCTATATCTGTGCGCTTTTCAATTATGGG  
AGGACTGAAAGCGGCCATCCTCTCAGACGTTATACAAGGTTTGACCATGATCGGTGTG  
TCGCTCGTGATAATCGTGAGAGGCTCCGCTGATATCGGTCCCAGTCAAATTTTAAACGT  
GACGTACGAACGTGGCCGATTGGAATTCTTCGACATGAATTTTCGATCCCACACTTCGAG  
TGACGACTCTGTTCGGCAACTCTGGGTCAATTATTCATGAGCCTGTCCATCTTCGGTTGT  
CAGCAGAACTTCGTGCAGAGATATTGTAGCATGACCAGCGAGAGGAAAGTGATCAA

>novel\_circ\_001963

GCAGCAGCAGTACTCGAGGGTGAAGGAAGAGGCGGCGGAATCCCAAGAGAGCCCGG  
GATGACGATCAAACCGTCGTCCATGGTGACCGACTATCTGGTCTTCGTTCGGTTGCATCG  
TTGCCTCGTTCGTGATAACATTGTGGGGGAAATTTTCGCGGCAGGCGGAAGGAGGCGAC  
CAAGGCCGATTACGTGTTTCGCTACGGGGACCGTATCTATGGGCGCCATGATGCTGTCTGA  
TCGCGCGCGGCACGCTTGGCGTCAGATCCTTTCTAGGTTATCCGTTCGGAGCTGTACTAT  
AGAGGGAGCGCCATGTGGGAGGTCATCTACGGTATGATGCTCGCGTATCCCATCGTGTG  
CTTCATCTTCGTCCCGGTTTACTACAGCCTCGGGATCACGTCCGTCTATCAGTATCTAGA  
TATGAGGTTCAAGTCGAAGCTAGTCAGATGCCTCGCAAGCTTCTCCTACGTGATACGAA  
GCCTGCTGAACTTGCCGTACGATATTCACGCCTTGCGTAGCTCTTAAGGCTGTGATT  
GGCCTGCCTTACTGGGCCAGTATAGTCGGCATTACATCTATATCTGTGCGCTTTTCAATTA  
TGGGAGGACTGAAAGCGGCCATCCTCTCAGACGTTATACAAGGTTTGACCATGATCGG  
TGTGTGCTCGTGATAATCGTGAGAGGCTCCGCTGATATCGGTCCCAGTCAAATTTTAA  
ACGTGACGTACGAACGTGGCCGATTGGAATTCTTCGACATGAATTTTCGATCCCACACTT  
CGAGTGACGACTCTGTTCGGCAACTCTGGGTCAATTATTCATGAGCCTGTCCATCTTCGG  
TTGTGAGCAGAACTTCGTGCAGAGATATTGTAGCATGACCAGCGAGAGGAAAGTGATC  
AA

>novel\_circ\_001964

CAGGCAGCAGCAGTACTCGAGGGTGAAGGAAGAGGCGGCGGAATCCCAAGAGAGCC  
CGGGATGACGATCAAACCGTCGTCCATGGTGACCGACTATCTGGTCTTCGTCGGTTGCA  
TCGTTGCCTCGTTCGTGATAACATTGTGGGGGAAATTTGCGCGCAGGCGGAAGGAGGC  
GACCAAGGCCGATTACGTGTTGCTACGGGGACCGTATCTATGGGCGCCATGATGCTGT  
CGATCGCGCGCGGCACGCTTGGCGTCAGATCCTTTCTAGGTTATCCGTCGGAGCTGTAC  
TATAGAGGGAGCGCCATGTGGGAGGTCATCTACGGTATGATGCTCGCGTATCCCATCGT  
GTGCTTCATCTTCGTCCCGGTTTACTACAGCCTCGGGATCACGTCCGTCTATCAGTATCT  
AGATATGAGGTTCAAGTCGAAGCTAGTCAGATGCCTCGCAAGCTTCTCCTACGTGATAC  
GAAGCCTGCTGAACTTGGCCGTCACGATATTCACGCCTTGCGTAGCTCTTAAGGCTGTG  
ATTGGCCTGCCTTACTGGGCCAGTATAGTCGGCATTACATCTATATCTGTGCGCCTTTTCA  
ATTATGGGAGGACTGAAAGCGGCCATCCTCTCAGACGTTATACAAGGTTTGACCATGAT  
CGGTGTGTCGCTCGTGATAATCGTGAGAGGCTCCGCTGATATCGGTCCCAGTCAAATTT  
TAAACGTGACGTACGAACGTGGCCGATTGGAATTCTTCGACATGAATTTGATCCCACA  
CTTCGAGTGACGACTCTGTGCGCAACTCTGGGTCAATTATTCATGAGCCTGTCCATCTT  
CGGTTGTCAGCAGAACTTCGTGCAGAGATATTGTAGCATGACCAGCGAGAGGAAAGTG  
ATCAA

>novel\_circ\_001965

AAACGCGGCGCTCGAGGCACGCGCGAGAGCGAAAGCAATCACGAACGTCCATCTCTA  
TTTGACGCAAAGGATAGAAAGTAGCTAAATACGCGACATCTGTAAACATAGCTCGAC  
CAACCTCTTGCTCGTGGCCGTTCCGCGGATAGATTCAAACACGAGGCCGTTAAGGATA  
AACGAGTACCACGTGCGTAACATTGTTTCGTACGCTCTTGTTTCCCGAAAGCAGGCAGC  
AGCAGTACTCGAGGGTGAAGGAAGAGGCGGCGGAATCCCAAGAGAGCCCGGGATGA  
CGATCAAACCGTCGTCCATGGTGACCGACTATCTGGTCTTCGTCGGTTGCATCGTTGCC  
TCGTTTCGTGATAACATTGTGGGGGAAATTTGCGCGCAGGCGGAAGGAGGCGACCAAG  
GCCGATTACGTGTTTCGCTACGGGGACCGTATCTATGGGCGCCATGATGCTGTGATCGC  
GCGCGGCACGCTTGGCGTCAGATCCTTTCTAGGTTATCCGTCGGAGCTGTACTATAGAG  
GGAGCGCCATGTGGGAGGTCATCTACGGTATGATGCTCGCGTATCCCATCGTGTGCTTC  
ATCTTCGTCCCGGTTTACTACAGCCTCGGGATCACGTCCGTCTATCAGTATCTAGATATG  
AGGTTCAAGTCGAAGCTAGTCAGATGCCTCGCAAGCTTCTCCTACGTGATACGAAGCC  
TGCTGAACTTGGCCGTCACGATATTCACGCCTTGCGTAGCTCTTAAGGCTGTGATTGGC  
CTGCCTTACTGGGCCAGTATAGTCGGCATTACATCTATATCTGTGCGCCTTTTCAATTATGG  
GAGGACTGAAAGCGGCCATCCTCTCAGACGTTATACAAGGTTTGACCATGATCGGTGT  
GTCGCTCGTGATAATCGTGAGAGGCTCCGCTGATATCGGTCCCAGTCAAATTTTAAACG  
TGACGTACGAACGTGGCCGATTGGAATTCTTCGACATGAATTTGATCCCACACTTCGA  
GTGACGACTCTGTGCGCAACTCTGGGTCAATTATTCATGAGCCTGTCCATCTTCGGTTG  
TCAGCAGAACTTCGTGCAGAGATATTGTAGCATGACCAGCGAGAGGAAAGTGATCAA

>novel\_circ\_0019662

TTATATAATGTATATTTTATCTGAGGAGGAGAATATCAATAGGAAGTAATAAAATACAGTT  
ATTCCAGTTATACACATTTTGTGTGATTGCAACATTCTAACAGTGAAAATCTTTGACGCT  
TCTTTTAAATTACTTAAGATCTTTTTCATTACTTAAGATCTATAATTAATAATGACTCAAA

TACCAATTCTTACATTTTCTAATGGATATAAGATGCCTGCATTTGGTCTTGGTACTTATCA  
GTCACGTCCTGGAGAAGTAGAAAATGCTGTAAAAGAAGCAATAAACTTAGGATATCGT  
CACATAGATACAGCATATTTTATCAAAATGAGAAAGAAATCGGTGAAGCGATTCAAGC  
GAAAATTAAAGATGGAACGTGTGAAAAGAGAAGATCTTTTCATTACAACTAACTTTGG  
AATAATTTTCACAAACAAGAAAGTGTAGTCCCAATATGTAAGAAATCGTTAGAAAATCT  
TGGATTAAAGTTACATAGATCTCTATTTAGTTCACTGGCCATTTGCCTTCAAGGAAGGTGA  
TGATTTGTTACCCAGAGACGAAAATGGCACTCTTTTGTATCGGATACTGATTATCTTGA  
AACTTGGAAAGGAATGGAAGAATGTGTGCAATTAGGATTGACTCGTAGTATCGGAATT  
AGTAATTTCAATCAAGAACAATCACTCGCTTGCTTAATGCAGCTAAAATTTTGCCTGT  
AAATAATCAGGTTGAAGTCAGCATAAATATAAATCAAACGCCATTAATAGAATTTTGTA  
AAAGCATAATATTACAGTAACTGGTTATTCACCATTGGGACAACCTGGAAATAGATCAG  
GTTTACCAACTTCCTTAGATCATCCAAAAGTAATAGAAGTTTCAAAAAAATATAACAAA  
ACATCAGCACAAATTGTTTTAAGATATATT

>novel\_circ\_001967

ATGACGCCTTCCTGGATTCTTCTTTTCCCTTCTTTATTTTCCCTTGGTTCACGGTCAGCTG  
GATATACCGTCCTTGAACGAGAATTCCCGCGGTAAATTCGGCAGGCGGCTTCCGCCTAC  
GGAGGGTGAGCTGCAAGACATTTTAGCAAGATTGGACTTCCTTGGTACCGAGAGATGC  
AGCGCAAATGTGGCTGCGCAATGGTCCTACGAGACGGACGTGAACGAGTACACGCAG  
ATACAGGCGCTCGAGGCTCAGAGAATATACGCAGATTTTCAGAATCAGGCTTGGTTCCCT  
GATTTTCGAGGATCGATAAAAATAATATCAGAGATCCTGTGATCGGAAGACGTCTCAGGT  
ATTTGTCTGTGGTTGGTCCATCGGCTCTTCCACCGGATCAATTGGACAGGTACAATCGC  
GTGATCAACGATATGCTGGCAGTGTACAACGAGGCTACCATTGCGCGTACAACGATCC  
CTTCCGGTGCGGGCTGCGGCTGTATCCAGATATATCGCAGATCATGGCGAAAAGTCGCA  
ACTGGGACGAGTTGCAATATGTTTGGACGGAATGGAGAAGACGTAGTGGCATGAGGAT  
CAAGGATCTGTATCAACAACCTTGTCACATTGAACAATGAGGCGGCTAAACTGAACAAT  
TTCACCGACGCGGCAGAATATTGGATGTTCCCTTACGAATCTCCAAATCTGCAACAAGA  
TATCGATGAAGTTTGGGAAATGATACGCCCCCTTTACGAAGAATTGCACGCGTATATTC  
GAAGGAAATTAAGGGACTTGTACGGGCCCCGAGAAGATCGGCTCTCATTCTCTTCTCCC  
AGCTCATATTCTTGGGAATATTTGGGCTCAATCGTGGACTAACATTATCGATATCACGAT  
TCCATATCCGGGAAAAAATAACCTAGATGTGACGCAGGAAATGCAGGCCCAAGGTTAC  
ACGCCTATCGAGATGTTTCAGAATCGCCGAGGAATTTACTTATCCTTGAACCTGAGCGC  
CATGCCACCGGAATTCTGGGCCGGAAGTATAATCGTCGACCTGGAGATCGATCTTTGA  
TTTGCCAGGCTTCCGCCTGGGACTTTTGCAACCGTCTAGATTACAGGATCAAGATGTGC  
ACCAAAGTCACCATGAAGGATTTAATCACGGTGCATCACGAGATGGCCCATATCGAATA  
CTTCTTACGATACAGCGGATTAATCGTGAATTCAGGGATGGCGCCAATCCAGGATTCC  
ACGAAGCGGTGGGTGAAGCCGTGGCCCTCAGCGTCGCAACTCCTCGCCATCTTCAGA  
CGCTAAGCTTGGGTAAACAAGTACATCGACGAGTTTACAACGGATATCAATTATCTGTTT  
ACTCTTGCCATGGATAAATTGGTCATGTTGCCGTTTCAGCATCGTAATGGACAGGTGGCG  
GTGGGACGTGTTCCGTGGTTACGTCAACAAGGGAAGACTACAATTGTCATTGGCACAGG  
TTGATGGAGCAATACGCCGGTATCAAGCCCCCGTTTTGAGATCGGAGGACGATTTCTGA  
TCCTGGCGCCAAATACCACATTCCTGCGAATATCCCGTACATCCG

>novel\_circ\_001968

ATGGAAGACGAGGGCAATCACGGCAACGACGACACCAGATGCTTCATCCTATCTACTC  
TCGCAGCGCTTCAGTGGTCCAGAGTCTCGTGCGTCCTTTGTCGGGCACCTATGCTCGTG  
TTCGACAGGTATCCATTGGTGGACGGCACCTTCTTCTTGTCACCTAGACAGCACTCGTC  
CGCCTGTGCAGAGGTAAAGTGGAAGGTCGCACGCAATTCTTGTCTGCCGTTTGTATG  
AGTTGCCTGGAGGGTAGTGGCGGTCAGCCTGTACGTTGTCGTTGCTGTACTCAACCCT  
GGGACGGGTCTAGCTTAGTCCTTGGAACCATGTATAGCTATGATATCTTCGCTGCTATGC  
CCTGTTGCACCGAAAGACTTAAGTGCAACAGCTGCCAGAAGCCGCTCATCTACCCACA  
CCAGCGGCTCAACTTCTATTTCGGACTACAGCCGCGTGTTTCGCGTGTCGCGATTGCCGTG  
CAGTCGACGCCCATTTCGTGAAACCGCTGTCGGTCTGCTTCACCCGCGACCAATTCCA  
GCTGTACAGCCAGTGGCCGTAACCATTAGAGAACTTAGCTAACCGGCGTCATCGAATC  
ACTGCGACTGAACCGTGCCCTTCTTCTTCGATCCGCTCATCTCTTTGCTCCGAACGAC  
CTTGCTCTAGATCCTTCCATCGTTTTTTTTTCATTCTTTCTTCTAATATGATTACATAAACAC  
AAACACAAACAATCACACACACACACACACACACACACACACACACACACACACACACAC  
ACACACACACACACACACACACACACACACACACACACACACACACACACACACACACAC  
ACACACACACACACACACACACACACACACACACACACACACACACAAATACAAATAAAAAATACAAATA  
AAAATAAAAAAAAAATAAAAAAAAAATAAAAAATAAAAAATACAAACATAAATATAAACAC  
AATTACACACAATTACACACACACACACACACACACACACACACACAAACACAAATACAAACATAA  
ACACACACGCATGCACGCACACACATACACGTACACATGCACATACACATTATGTATGT  
CATTAAAGATGATGGAGATGAAAAAGAAAAAGAAAAAGAAAAAGAGCAGAAAAA  
GCGTAAGGAGAAGGAAATGTTGGAAGGAAGAAGTAAGTAAAAAATATAGCGCGGGTAC  
TCGCCACTTCGCTCTTTTCCATTCTCATGGAGAAATATCATTTCCCCCACCCTTTTTTC  
TTTCCGTTTAATAATTCGTTAATTAATAATCGTGCATTCAATAAATAGATTCTTTGATGATT  
TTCGTTTCTTTTTCCGATTCTGAATTAATAGAACAGACGTTCCCCTCCAATGTGTGTCGGA  
ACGAATAATTCTAACAATTATTAGGGAAACGAGTAAGCTTTTTTCCCTTGTTTTATTACG  
ATTCAAGTATTATCGGATCTTTGAGAGTGGAAGAGAGCGGAGTGCCGAGTGCCTGGGA  
AGTTTTTTCTTAGAAACCATTTCAAGATTTTTCTTTTTTTCAATAGTAAGGTTTATATAT  
GTTGATACTACATTTAATGCAAGGGACGAAGTGTATTTCGATAGACGGACGCTTTGGATG  
GTGGGCGTAATATTGGGCACGTTGACACCGAAATCGACGACGTATCGATCGATTTCAT  
CAAAATTGTTTTTTTAAAAAAACAAAAAATACACAGTCCTTGGCAGGAGCCAAGGAC  
CAAATATCATCAGTATTATCCATTTATAAAAAATGGAGGAAAGGAGGAAAGGAAGGGA  
GTTTTTTTTTTTATCTTTTACGTTACGTTTTTTCATTTATTTCTTTTTGTTTAAAAGTTACG  
AAGGACCCGATGAATTAACCTTCGTATCTTATATTTTTTTTTCTGTTTTCTTTTTTTGTCTT  
TTGTTAGTTTTTTTTTTTTTTTTGTTTCGTTTCTTATTGTGATTTTTTCATTCGGCGAAGAA  
CCGATTTAGTCGAATTTAAATGCGAGTCAAATTATTTAGGATAGTTATAAATGATGAAAA  
GAAAAAGAAAAGGGACGTTTAGTCGTTCTAGAGAGAAATAAGAGAGAAATATTTGAG  
AAAATATTATAGGTTTATAAAAAATGAAAGGGAGGAAGGAAGAATCATCGTGGAATAC  
GTCGATACGTGGTCGATTTCGCGTGGAATCCGAAAAGTTTTAATCGTCCCTCGCATTTTC  
TATATAGTCGAATTGCGTTGATCGAAGGGATAAAAGAAAGATGACGAATCGTGGAATAA  
TATGAAATCCGAGATACGCAGAATTATAAAAAATAAACAAAAAAAAAAAAAGTAATAAT  
GGTCAAACCTCCCTGTATATTAAGTAGGTATTGTGTTAAGGAAGATGAAAAGAAAAA  
AGGAAAAAAGAAAAAGAGAAAAATAAGAGAGAGAAAAAAGAAATGATAAAA  
GGCGATTTCTGTACGAAAAGGGGGGAGAAAAGATATGAGAACTATCGTTTGTTACTTAG  
ATAATCGAACGTTGTTTTTTTTTACATTTTATTAGTTTATACGTTTACGGCGGCCATGTTGA  
TTTTGTTTAAGGATCTACAACCTATTCGAATGAGTTTCACGTTGATCGGCAGGACGCC

AGCGATCTTCCACCCTCGAGATCAATCCCCCTTACGATTATATTTTGAGAATAAAAATTCC  
TCTGGAAATATATATATATATATATTTTTTACGGCCAGATATCGTGTTTCGAGAATAATTATCC  
TGAAAACTAATTTTCGGATAATAATTTCTCGATACAATGAAAAATGACCAGATAAATTC  
TCGATAGTTTTACCCTCGACCGTATCCTCATATTCCTTACCCCTCAAGTCCATCCCTCTCT  
CACTCTCTCTCTCTTTTTTTTTCTTTTTTTTCGTGAAACAGAGGACATTTCGGTTTACCACAC  
GAAAACGGGAGAAAAACAAATCCTCGATTACTTTTCCTCTCGATCCCGGATCCCTTTTTTC  
CACCCCATTTTCGTTTCAATTTTCGCAGCAACGGCGTGTTCCAAGTTGGAAGTATACTCG  
AGGGTTGGTCGAAAGCCACGGGCGTCCGAAGAAGCCAGTGTAATACGTAATTAAGC  
GGGAGAGGAATAAAGGGAGTAGTTGGAAGGATGGCGGAAGGAACCGCAGGGTTCTTT  
TAAAAAAGATGGCGGAAGAGTGAAAGCACGGGTCGTACGATACGTTTTTCTCCGTAAG  
GAAGATGGAGAATATGGGAATGGATATCGCGAGAGAAGAAAGAAAAGGAAGAGAAA  
GAAAGAAAGAAAGAGAGAAAGAAAAGGAAAGAAAAAAAAGATCTTCGTTTTTTCTG  
GCGATGCTGGTCGTTGCTATCCATCAATAGCGGCCGTCCACAAACAGAAGACCGCCC  
ACCGTTTTCCCAAG

>novel\_circ\_001969

ATGGAAGACGAGGGCAATCACGGCAACGACGACACCAGATGCTTCATCCTATCTACTC  
TCGCAGCGCTTCAGTGGTCCAGAGTCTCGTGCGTCCTTTGTCGGGCACCTATGCTCGTG  
TTCGACAGGTATCCATTGGTGGACGGCACCTTCTTCTTGTCACCTAGACAGCACTCGTC  
CGCCTGTGCAGAGGTTAAAGTGGAAGGTTCGCACGCAATTCTTGTCTGCCGTTTGTATG  
AGTTGCCTGGAGGGTAGTGGCGGTACGCTGTACGTTGTCGTTGCTGTACTCAACCCT  
GGGACGGGTCTAGCTTAGTCCTTGGAACCATGTATAGCTATGATATCTTCGCTGCTATGC  
CCTGTTGCACCGAAAGACTTAAG

>novel\_circ\_001971

ATGGACTCCCCGAACGCGAGATATACCGCGACCCGGACGTGGTGAGAGCCGACGAC  
AGGGTGAACGAGGTGGTGCACACGGACACAGCGAGAAAGATGCTGTCCATCTTCCGG  
CAGATGGAGGAGAACGCGTGCAAGAAGGAATTGCCGAACGGGCCGAAACCTTTGAA  
GTGCTTCACGCCGCCCGGAGGACAAGTACGCGAAGGCGACCGCGTCGGACTCCGA  
GCAGGACGAGGACGAGGATGGCGAGGAGACGGAGGGTGAGGACAGCGGCGAGGAA  
AGGGATCCTAACTACGTGCGAGCTTCCGATAAGGTTGAGGACGAGTTTTTGAAGCAAG  
CGCAGAACGCGGCCCGCGCAAAAACCTTGTGCGCGAAATTCGAGCACTGGGAGGAGA  
CGGATGGGAAGACGACGACGAGCAACCAGCACATCGCCGAGATGGAAATCGCTCAAA  
ATTCGTCCGGGGAACAGCTGAGCATAGAGTCTGCGAGCAGTCTGAGGGCCCGTTTCGA  
GTCCCTCGGCTCGCAAACCAACGAATCGCCGCGCACACCTAAGGTCAAAGTCAATCGA  
TTCGTG

>novel\_circ\_001973

CCTCAGACAAACCGGACCTGGGCCTCGAGGAGTTGTGCGAGCCTGAACGTGAAGTCCC  
GGTTCCAAGTGTTGAGAAAGGCCGGCGCCGAGACTAACGAGATCGAAAGGTGCGCGT  
CGCAGATCGCCGTGAAGAGGTCCCCGAGTATCTTGAGCAAACCTCGCCAAATTCCAGGC  
GAAAGGCATGGATATCGGAGTTGCGGACGAGTCGCTGAATGGGATCCCTTACGAGGAG  
TCGAGCGAGAGCGAGGAGGAGGAAGAGGCGGAGGAGACGGAGGAGGTGGACAGCG  
AGATCGTGAAGGCTAAACGCGCGACCCGCGAGCGACCGATCAGCTTCACGAAAATGG

ACGACATAAAGAATCGTTGGGAGACGACCAGCCAGCAGGGGAGACGGGAGGTTCAAC  
GGGAGGCCAGGAAGGAGGAGATAGCCGGGATTCGTTTCGAGATTGTTTCATGGGCAAAC  
AGGGTAAAATGAAGGAGATGTATCAGCAAGCGGTAGCCGGAAGCGAGCGCGTGACGA  
AGATCAATGCGGCGGAGGAGATCCAACACTCGACCCACGCTCGTTCCATCAAAGAGA  
GATTCGAACGTGGCGAGCCCATAGCCGCGTCGGACGACGAGACCGACAGCAAACCGA  
AACCGGAGAAGGCTGACGAGGAAGTGATCGCAGCAG

>novel\_circ\_001974

ATTCCAGGCGAAAGGCATGGATATCGGAGTTGCGGACGAGTCGCTGAATGGGATCCCT  
TACGAGGAGTCGAGCGAGAGCGAGGAGGAGGAAGAGGCGGAGGAGACGGAGGAGG  
TGGACAGCGAGATCGTGAAGGCTAAACGCGCGACCCGCGAGCGACCGATCAGCTTCA  
CGAAAATGGACGACATAAAGAATCGTTGGGAGACGACCAGCCAGCAGGGGAGACGG  
GAGGTTCAACGGGAGGCCAGGAAGGAGGAGATAGCCGGGATTCGTTTCGAGATTGTT  
ATG

>novel\_circ\_001977

GTGGGTCAGAACGGCGACACGAACCCGAACCTGCCGCAGCTGTGGCAAGGTCGTCTTC  
CAAATGGAACAGACAAAGGCCGAGGGTCTGGTCTGGCACAAGAATTGCTTCCGGTGC  
GTCCAGTGTAGCAAGCAGCTTAACGTGGACAATTACGAGAGCCACGAGAGCACGCTTT  
ACTGTAAGCCACACTTCAAGGAACTCTTCCAACCGAAACCGGTTGAGGAGTCGGACC  
AGCCTGTGCGACCTCGAAAGCCGGAGCTGATCATACGGGAGAACGAGCCGAAAGAGT  
TGCCGCCCCGATGTGGTCAGAGCCTCAGACAAACCGGACCTGGGCCTCGAGGAGTTGT  
CGAGCCTGAACGTGAAGTCCCGGTTCCAAGTGTTTCGAGAAGGCCGGCGCCGAGACTA  
ACGAGATCGAAAGGTCGCCGTCGCAGATCGCCGTGAAGAGGTCCCCGAGTATCTTGAG  
CAAACCTCGCCAA

>novel\_circ\_001978

AAGTCGAGCTTCAATAAATTCGACGCCCTCAGCAAGAAGACGGTGCTGCATGTGCGCT  
CGATCGATGCCGGCAAAGTGCAACAGCAGCTGAACGCCGTGGGTCAGAACGGCGACA  
CGAACCCGAACTGCCGCAGCTGTGGCAAGGTCGTCTTCCAAATGGAACAGACAAAGG  
CCGAGGGTCTGGTCTGGCACAAGAATTGCTTCCGGTGCGTCCAGTGTAGCAAGCAGCT  
TAACGTGGACAATTACGAGAGCCACGAGAGCACGCTTTACTGTAAGCCACACTTCAAG  
GAACTCTTCCAACCGAAACCGGTTGAGGAGTCGGACCAGCCTG

>novel\_circ\_001979

AGCGAAAGCCGAGAGGAAACGACGAGCGTGACAACGGTGAGCTCGCAGAGCGCGAA  
GGGTGGGACCAAGACGAAGAAGAAGAAGATCGAGGGCGTCGCCGTAATGATGCCTC  
GCCAATCTCACTCCCCGCACAAAGAAGACCAAAAAGAGCAAGAAGAACGAGCTCG  
AGAAGGAAAACATTTCTGTGAACTGTAACCTTGCAAGGGACGAGCATGCACCCTGGTCC  
CCGCCAGATGAACTCGGAAACCCTTGATTTCTCGGACGAGGACGATCTGTGAACGTC  
AACGTGAAATCTCTG

>novel\_circ\_001980

GTGTCCACGGTGCGACTGTCCGACGATCCAGGCGCGCCATAATGGCGGAGGTGGCGAC

CAAGAAATCGATCAATGTAGTAGTAAGTAGCAAACTAGCGAGGTGTGTAGCGTTCAA  
TCTAACAACGGTTTGTATCCAGTTGGATAACATAACCGCGAGTAACAAGCAACTAATATC  
GTTGTGCGAGAGCAACGACGACGAGGACGATCTAATCCTGACTAACAACACCCGTAAC  
GAATTGGACACGGACGACAAAAGCCTTCAGGAGTTGATCGAGAGCGAGCTGGCGCTG  
AGAATTTGCTCCAACGCCGAGCAGAAGGAGGAGGAGGAGGAGGAGGAAGAGGAAAA  
CGAAACCGGTATAGAGATGGAAGGGGGGAAGGAGGCAGAAGCGGTGAGGAGGATCG  
TGCTCGACAGGCAGCAGGAGGAGCGTGTGGACGCGAACGCGGAATTCATCGCCGCGG  
AAACGGAACTCGGCCTCCGTCTGGGGAACCGATTACAGCTATCAGAACGGCCACGT  
GTCGCCCCGACGCGGCGCTCGTCGACGCGCCCTGCTACGAGGGGGGGAGCGCGGAAGC  
GGTCGGCGAGGGGAAGGAGGAGCAAGTGTTCGAGGAGCGGGCGGAAGTTGGCAGCG  
GGACGGCGATCGAAGAAACAACGACGCGCGAGCTCGAGGACGGGGCGCGTGAGCAG  
GCGGCGGACGATGGCGGATGCCCCGCGATGCCCCGAGGAGGACAACGAAGAACCGTGT  
CCCGATTATCCCGCCCTTCGGCCCTTCGGCGAGGACAGACTGCCGGATGCGATGAGCC  
AGCGACCGTTTCGAGTCGTCTGTCGAGGAGGCCGAGGAGGAGCGGGTGAAAGCAGCC  
GACAAGTATCGGGAGGAAATAGAG

>novel\_circ\_001981

GCGAGGACACGCAGTGCGGTACCGAGGAGATTGTCGCCACCAGCCAGGGAGGCGACC  
AACTCCAGAGGATGACGATGGACGGCATGGAAGTGGTGGGCTCGCAACCCACGCGG  
CCACCAGCCCGTTCTTGCTCTCGCCGCCACCCCTTGACACCACCATCATCATCAT  
CCACACGCCACCTTCAACCTGCAAACGGTGCAGCTCAGTTTCGACGCGTGTCTACCGT  
ACAACCTCGGCGACGTCCTCGAATTCGATCGTATGCGGCGTTGGCGGCACGTCAACACC  
GGCCGCCACCACTTGACACCTCGTCCACCAGCTGCAACAAGACGATACCGAGCCTGTCTG  
CTGGCCCCCTTGCGCGCCCCCTGCAAGCCCAGCATCAAAACAGTGCCGATACCACGGATC  
ATCATGGCCGGCATCATCAACACCACCATCAACGGCTCAACGATCACCAGCATCACCG  
GCACGTCGACGCTTCCTCGCCCTCCAGCGACTCGACCGACGGGAAACGACGTTTGCA  
GTCCGTCAACGAGGAGAAGGACTGCTCCAGGGAGTGCAGAGACGATCTTCAGGAGTC  
TAACGATAAGGATAAAACAG

>novel\_circ\_001982

TCAGGATCTGCTGACGGTGTGCAGGGAACCTGAATCTGGAGAATTCGGTGGAGGAGTTA  
ATGAGAGAATTGGGGGCGGACGAGCACGGTCGCATTCCTATCAAGAGTTCCTGAGGT  
GCCGTTGGCCCTACGACCGGAGATCGAGGCCCTCAGGTCCGGCAAGCACAGAACTA  
GCCCCATCACACGCACACGCCCGAATACTTGCCGACGAGCAGCGACAACAGCCTCG  
GTACCATATCCGGGCGGCATGAACGCTGGGAGTTTCGATAGCGGGGCGCGCGACCTCTC  
GCCGGAGCCGCACACTCTGCAGAAACTGGTGGAAGCTGCCGCGGGAGGGACTGGCA  
ACATGCTGGACCTGGCAAACAAG

>novel\_circ\_001983

GGACAGGATCGATCGAGAGGGCGGAGAGGAGGTGCCGATCGTAGGAGTCGAGGGGG  
AAAAGGTTGAAAGCGTGGGAGGAGGGTCGAAAGGTTGAGCGATCCGCGGAGGAGGA  
AGAAGAGAAAGAGGACGTGGCGGAAGCACGTTTCGCTGGCGGTGGAAGAGGAAGAGG  
AAGAGGAAGAGGAGGAGGAGGAGGAGGGAGAGGGAGAGAAAGAAGATCGAAAAAG  
GGAAGGAGACGGTGGTTCGAGGGAGGAAGAGAGATGAGCCTGGTGGGTGACTGGCAA

AGTGCGGTGGTCGGCTGCTCGACGAAAGGCAGATAGCGCCATTAGTTATTGCTGGGCC  
GGAGAACGTCGTCGAGCCGATGCGCGCTACGGCCCTGGCCGTTGACGAAGAAGGGGA  
AGAGGAGGAGGGGAGGAGGAGGAGGAGGAGGAGGAGGCGGCGGAGGGAGGAGAGGG  
AGGAGAGGAGGAGAGGAAGGGGGCCCAAAGGGCCGCGATGCATCGCTTCGGACCTA  
GGCAACGTTATCCCCGAATCGGAGAATCCCTGACTTTCCTTCTGTCGCTCGGTTGCCTT  
CTGATCGTCGCCGTTGCCTCGCCTCTTCATCCCGCGCCACCGCACAGAG

>novel\_circ\_001984

GGACAGGATCGATCGAGAGGGCGGAGAGGAGGTGCCGATCGTAGGAGTCGAGGGGG  
AAAAGGTTGAAAGCGTGGGAGGAGGGTCAAAGGTTGAGCGATCCGCGGAGGAGGA  
AGAAGAGAAAAGAGGACGTGGCGGAAGCACGTTTCGCTGGCGGTGGAAGAGGAAGAGG  
AAGAGGAAGAGGAGGAGGAGGAGGAGGAGGAGGAGAGAGAAAGAAGATCGAAAAAG  
GGAAGGAGACGGTGGTTCGAGGGAGGAAGAGAGATGAGCCTGGTGGGTGACTGGCAA  
AGTGCGGTGGTCGGCTGCTCGACGAAAGGCAGATAGCGCCATTAGTTATTGCTGGGCC  
GGAGAACGTCGTCGAGCCGATGCGCGCTACGGCCCTGGCCGTTGACGAAGAAGGGGA  
AGAGGAGGAGGGGAGGAGGAGGAGGAGGAGGAGGAGGAGGCGGCGGAGGGAGGAGAGGG  
AGGAGAGGAGGAGAGGAAGGGGGCCCAAAGGGCCGCGATGCATCGCTTCGGACCTA  
GGCAACGTTATCCCCGAATCGGAGAATCCCTGACTTTCCTTCTGTCGCTCGGTTGCCTT  
CTGATCGTCGCCGTTGCCTCGCCTCTTCATCCCGCGCCACCGCACAGAGGTATCACGCA  
CGTTTCTTACATCGGTTATTACGAGGTGGCCTCCTATGATACCGCGGCCTTGAGACAAC  
ATCGTAACCGGATGCGCCGCGATGTCTCCAACGATGTGGTCGACAATCAGCCTTTGCTG  
CTGCAGTTGAAAGCGCTCGACAAACAATGGACATTACGGTTGGTTCGAGACAGGAGC  
CTGTTACGCCAGGACGCGACGTTTCGAGAACACGAACGGCCCCATCGACTTCGACGCG  
TCGCACTCTTACGTGGGCACAGTGTTGG

>novel\_circ\_001985

ACCTATCTGGGCTGACTCTGCAATCGGGAGTAGGCGTAGGACCAGGTGGTAGATTGGT  
CAAAGATGAATATTCAGTTGGTGGTGGGAGCAGTGCAACAGCTGGAGCAGTAGGATCT  
GCAATGGATGTTGATGGAGAAATGAACCAAATTCAGCATCATCCACCTACTCAACC  
TACTTCATCTAATAACACTCAGCCATCTCAACAGACTTTTATACCAGGTCTAGCACCACC  
TAATTCAACTAGTGGTGAGGGTGTGTTTGGCAGTAATGGGGGAGGGAATAATGGTGGT  
AATCCACATAATAAATTGGATGACAATAATTGCCCCAGACAAACCTGGATTCTTACACC  
TCATCATCTTACAACACGTAACATTCATCATC

>novel\_circ\_001987

GTAGAATTGGATCGAGTGGTTGGCAGAAAAAGGGTAGACGGGCGAAGGGATCGGAGG  
GGTGAAAGGCGCGTGAAAGGCGAAATCGGTGGAAGCGAAAAGAGGAAGAAGCCGAA  
AGAGGAAGAAGAAAGAAGGTAGAAGAGGAGGAGGAGGAGGAAGGAGGAGGAGGAGG  
AGGAGGAGGAGGAGGAGGAGGAGGAGGAGGAGGAGGAGGAAGAAGAAGAAGAGGAAG  
AGGCAGGATTTGCCGCGGCGACAGACTGCACTCTCGCACCACCGTTCTTCAGGGCG  
CAAGCGTGCACGTATGTTGTGCGTTTCCGTGCCCTAACCTGTCTCAACACGACGAGA  
GAGTCGTCGTTTCTCGGCGTTCTCATCCCTACTCCGCCAACATCGCCGCCGTTGCCGCC  
ACCGTTATCGCCACCGCCACCGCCGCCGTTACCGCTACCGCTACCGCCACCGTCACCG  
ACGCTACTATCGGCTCACCATCCCTCCAACGTTCAACGCGAACAAGCACCACCGCCAT



AGCCGACGTAACGACGACGACGACGAGGACGACGACGACGACGACAACGAAGACGA  
AGAAGAAGACGAGGGCCGAGAAGACGAGAACGAAGAAGGCGACCACGATCACCACC  
ACCACCACCACCACCACCACCACCGCCGCTACCACCACCACCGCCGCCACGACCACCTCCT  
CTACGACCACTACCACCACCACCGCCGCCACCGCCGCCGCCGCCACCACCCTACCAC  
CACCACCACCCTACCACCCTATCGCCATCACCGTGAACGATAGAAGGAGAAGGAGG  
ACGAGAAGGAGGATACCGATCACGAGGACGAGGACGAGGACGAGGACGAGGACGAC  
GACAACGACGTCGACGACGACGACGACGACGACGACGAAGACGAGGACGAGGACGAGG  
ACGGAGGACGGTTCGGTGGCGTGGGGGGTGGACATCCACGCGGGAACCTCGAGGCAGG  
CGCACCCGGCCGGCACGCACACACATTCATTCTAAGATGTGATTTCAAAAATGGCGGA  
TTGCCCTATGCCCGTTGCATACAGGAACGCAGACACATCCGACGGGAGCTGCTGCGA  
TGGACAAAGAATATGGTCTTCGTAGTCG

>novel\_circ\_001988

TTCGGAAGATGGCGATCGCCGCGACTCTTTCTTGGTTCGTTTGGTTGGCGAGGGGATG  
GTTCCCCAAAGAGGCGAGGGGAGGAGGGGGCGTTGGTTTCTCGCTGATTGAAAACGC  
TGATTGGCCGGGAAAGTCGTTTGAAACAGGATCACGGTGATCGTTTTGAGAGACGATA  
AACGTTGGCAATTATAAGCTACATCGAAGCTAAGGAAACGCGGCGACGAGGGTGAAA  
AAAGGGCTGGAAATGCCCGGGCAAACGGTTACAAGTATTTCCATTGACGGAACGTCGC  
CGCATCCCTGCTTCGTAG

>novel\_circ\_001989

TTAAAAAAAAGTATGATAAGAATTAAGAGAACGACGATGCGAAAAATCAACATCCTG  
TACCTCTTCTGTATAATTGTTACATTATACACTGAAATTATTATTAAGCGAAATTTAATTGT  
ATTATCGTGTAATTACTAATTATTGTCGTAATATAGGTTTCTTGGTGTAATAAATTGACCT  
AACTCTTAAGATTTAATGGTAAA

>novel\_circ\_001990

AAAAAGTATGATAAGAATTAAGAGAACGACGATGCGAAAAATCAACATCCTGTACCTC  
TTCTGTATAATTGTTACATTATACACTGAAATTATTATTAAGCGAAATTTAATTGTATTATC  
GTGTAATTACTAATTATTGTCGTAATATAGGTTTCTTGGTGTAATAAATTGACCTAACTCT  
TAAGATTTAATGGTAAAGTGATGTATTAG

>novel\_circ\_001992

GTGCAACAACAGCTGGAGGTGGTATCACAACCTGGTTGTCCAGGTATTGGTTGAATTATT  
GCAGGAGGTCGAGTTAATGTTTGCGGTATAGCTATACCAGGAGGAGGTATAACAGGTG  
CTACTGTTGCTATAGTTGGTGGTGCCATCATTGTTGCAGGAGCAATACTGGGTCTTACTA  
TCCCAGGTAAAGCTATATGTATATAAAAAATTATATATTCATTTCTATAAATCTTATAAAAA  
ACTTAAAAATATAAAATTTTTTCAATTATTTTAAATTCATACCTTGATTTAAAATCGGCGG  
TGCAGCTGCTCCAAGCTTAGTCAAACCAAGAGCAACTGCATTACTGGCTACCGCATCC  
ATCGCTTGAATTTTTGCAGTTGCAGCTGCAGCTGCAACTGCTGCAGCAGTAGGCATCAT  
ACTAGTTCCACTTGCGGACCCATAAGAGCATTTGGTGGCGTAATAGCCCTGCCTACTC

>novel\_circ\_001993

ATGACATAGAATGGGTTGGGTGGCGCTAGGGCGGTGTGCGGGTGGTGGCGGCCGCCTC

TCGTCCGTCCTCTCGCTGTCTCTCACCTCCCTCGCAAGCTCCCTCATCTTCACCATCCTC  
TGTATCCTCACACTTGCCCTCACTCTTGTCCTCTCGTGCGTGCCGAGGACATCTTCGA  
GGACGGCAAGTCGGACAAGGAGATCCTGGACAACCTGCTGCTGTGCGACCCGTTACGA  
CAAGCGGCTTCTACCCCGGTCCAAGGTACACTGAGGCCCCCGCCCCACACCCGCCAA  
GACGACTACACCCCTGACCACCTCGTACCCAATGACCCTCATCATCCAGAGCACCTCG  
AACACCACCGGCACCGCTACCACCATAACAGCACCACACAACCACAGCTCACTGCTCAC  
CCCTCGTCAAAAGGAACAAATTACTCGTGATATTATCCTACGAGTACGAATTAATATCGA  
AAGAAAAATATATAATATTATTCATTTATGTCGTGAAAGTCCGTACAGTCTATTAATAAGC  
AATGCGACGAACAGCTCGAAGCGTCACGTGACACCGATCAATTAATAAACTAATATTTT  
GACGCAAGTGATTTTTTATTTTTTCTTTTTTTTTTTTTCTTTTTTAAAGCGGCTATCCTAGG  
AAAGGCAACGTTTCATCTTTTCAGAGAGAACTCGTGACAAAAGAATCGTTCCCTAT  
TGGAGGAAACGTGGAAAGTTGCCACGACGCCCTCGAGCGCCGGCACCTCGTTTGTTT  
ACGGGGCGGACGCTAGAAAGGAAAGCGAGGTTTCGAAATCGCGTGTGTGCATCGTCGG  
CAATCTCCCTCCTCGCTTTTCGTCCGCCACGGAACCGTTTTCCAATTGAGGCGACAAAA  
GAGGCGCCACTGTGTCGATTGCTTGTTTCTCGCTAACCACACTCTCTTCACTCCGGGA  
TGAAACGCGAGACTTGTTATTATTACGTGGCAAAGAAGGAAGTAACGAACGAGGGA  
AAAGTAAGGAATCGTGGATAGAAACGAGTGTATGGAGTGAAGAACGTGTCGACAAA  
CGAACGAGGCACGAACCTCGCAACTGTAGTTGACTTTACTTCGGTATGCGGATTTCTGCT  
GCGGAATGCGATGGCCAGGTGACGCCACCGGCCTGTCGAACCGGTCGTGACCTCCTC  
TAACGACCCCAAGAACCAGTACAAGAACCAGAACATAACCACTACACGTCGCACCA  
ACACCTTCGCACCCACCTTCGCGCGCTATGTGATTCTCAACCTGAAATGCTTGAAAATT  
GTGCATTCTTTATAAACAGTGGTTTCATTTTAAATCAAACCTTGAATATTGCGGAACCT  
TGACCGTGAACGTGAGCGTGCTGTTGCTAAGTTGGCTTCCCCAGACGAGTCCAGTTT  
GAAATACGAGGTGGAGTTCTTGCTGCAACAACAATGGTACGACCCGCGATTACGATAC  
AGCAACCGGTCCCAATATGAATTCTTGAACGCTATTATCATATTACGATGATATCTGGTTG  
CCGGACACGTACTTCATAATGCACGGAGACTTCAAGGACCCGCTCATACCTGTTCACTT  
CGCCCTACGTATATATCGCAACGGCACGGTCAACTATCTTATGAGGCGTCATCTCATCCT  
GTCCTGCCAGGGTAGACTCAATATCTTCCCCTTCGATGACCCACTGTGTTTCATTTGCGAT  
CGAGAGCATATCGTACGAACAAACGGCGATCACGTACGTGTGGAAGAATGACGAGGGT  
ACGTTGCGGAAGAGTCCTAGTCTAACGTCGTTGAACGCATACCTCATTAAGAACCAGA  
CAATCACGTGTCCGATCAAAGTAAGCTGGAGAGCTGACGGACAGATCATGGTCGACTA  
CGAGGACGAGTTCGATGAGTTTGGGGACTCAAAGTGTTTCGCTGTGCCAGCGCAGATT  
GAGGAGCAAGGTAACCTACAGCTGCCTGAAGGTGGATCTGATTTTTACACGAGATCGTG  
CCTTCTACTTCACAACAGTCTTCATCCCGGGTATTATTTTGGTGACCAGCTCGTTCATTA  
CCTTCTGGCTTGAGTGGAACGCGGTACCGGCGCGAGTAATGATCGGTGTGACGACGAT  
GCTCAACTTCTTACGACATCGAACGGTTTCCGCTCTACGCTGCCCCGTCGTGTCAAATT  
TAACTGCCATGAACGTGTGGGACGGCGTGTGTATGTGCTTCATCTACGCCAGTTTGCTC  
GAATTCGTCTGCGTGAATTACGTTGGCCGTAAACGGCCGATGCACAATGTCGTCTATCG  
CCCCGGGGAGAATCCTGTCACCCAG

>novel\_circ\_001995

CTGACGGACAGATCATGGTCGACTACGAGGACGAGTTCGATGAGTTTGGGGACTCAA  
GTGTTGCTGTGCCAGCGCAGATTTGAGGAGCAAGGTAACCTACAGCTGCCTGAAGGTG  
GATCTGATTTTTACACGAGATCGTGCTTCTACTTCACAACAGTCTTCATCCCGGGTATT

ATTTTGGTGACCAGCTCGTTCATTACCTTCTGGCTTGAGTGGAACGCGGTACCGGCGCG  
AGTAATGATCGGTGTGACGACGATGCTCAACTTCTTCACGACATCGAACGGTTTCCGCT  
CTACGCTGCCCCGTCGTGTCAAATTTAACTGCCATGAACGTGTGGGACGGCGTGTGTATG  
TGCTTCATCTACGCCAGTTTGTCTCGAATTCGTCTGCGTGAATTACGTTGGCCGTAAACG  
GCCGATGCACAATGTCGTCTATCGCCCCGGGAGAATCCTGTCACCCAG

>novel\_circ\_001996

GTAACACTACAGCTGCCTGAAGGTGGATCTGATTTTTACACGAGATCGTGCCTTCTACTTC  
ACAACAGTCTTCATCCCGGGTATTATTTTGGTGACCAGCTCGTTCATTACCTTCTGGCTT  
GAGTGGAACGCGGTACCGGCGCGAGTAATGATCGGTGTGACGACGATGCTCAACTTCT  
TCACGACATCGAACGGTTTCCGCTCTACGTGCCCCGTCGTGTCAAATTTAACTGCCATG  
AACGTGTGGGACGGCGTGTGTATGTGCTTCATCTACGCCAGTTTGTCTCGAATTCGTCTG  
CGTGAATTACGTTGGCCGTAAACGGCCGATGCACAATGTCGTCTATCGCCCCGGGGAG  
AATCCTGTCACCCAG

>novel\_circ\_001997

CGAACGCGACCAGATTGAGGCATTCGAGACACCTGGATTTGAGATCTCAGTTCTCCAA  
CGACGAAGAATTTGCGATGCAGCAGGATGAAAATCACAATCACAAGCCTGTGTTCTCG  
AATTGTTTGAATTACGCGCCAGTTGTGAAGGAGGAGGAACCGGTGGGCACAGTTGTGA  
TCCAAGTACACGCCAAGGACAGGGACAATCCGGACAACGGAGGTACCATCACTTACA  
GTTTCGTGACCGCGCCTGGCGAGAAGTTGAAATTCGAGATCAACAATAGAACCGGACT  
GATCAGGACGACGCAGGTGTTGGACAGGGATGAACCGGCTCGTGAAAAAGAGGCCTA  
CCTGACCGTTCTCGCGACCGACAATGGAAGACCGCAGCTCGACGACGTGTGCACGTT  
CAAAGTCACCATCGAGGACGTGAACGACAATCCCCCGTTTTTTGACAAAGTG

>novel\_circ\_001999

GATATATTGGAGAACGAGCAGATCAAATTGGATCGCGTGTTCCGTGGATCGTTGATCCA  
CGATATCGTGCGAGGGATGGTGTATCTTCACGCGTCCGAGGTGAAGAGCCATGGAAAT  
CTGAAATCGTCCAACCTGCGTGGTCGATTACGCTTCGTCTCAAGATCGCCGACTTTGG  
ATTGCACGAGTTGAGGAGGCCTGCTTATTGCGGGGCGGAAGTCGACAAGAACAATTAC  
GCGTTTTTGGAGGGGGCAGCTGTGGACGGCACCGGAATTATTGCGAATGGAAAGGCGG  
CCACCCGAGGGTACTCAGAAGGGTGATGTGTACAGTTTCGCTATAATCGTTCACGAGAT  
CGTGATACGCCAGGGGCCATTTTACTTGGGCGACGATTACGACTTTTCCCCGCAAG

>novel\_circ\_002000

TTCCAATTATACCAGAGTTTCTGTACGATATCAAGCATCCGAATGCAACGTTGAGCCAA  
CATTTTGAACAAAATGGACGAGCAACGGTGACCACTGTTTCATCCAACGAGTATCAATA  
TCGTGACCTCCACGAGCCCCGAGCGTGACCACCACGCCGAAATGCCTCTGCACGTGCGG  
CCAAGACCAATGAATCTCAATTGGAATTTCTTTACCCGAGCACACCGTCCACCGTCGA  
GTCGACAACGGGTTTGGCTCGGGACAACGAGCAGTAGCGAAACGGGTTCAACGGCAGA  
ATCGGAAGAGAAACAACGACATCGCGAGTTACTTCAAGAAACGGTCGCCGTTGGTATA  
ATGTTGCGCTCGAAGGCGTTCGTTCAATTGCTGGCAAATCCGATTGTCGGCCCCCTCAC  
CCACAAGATCGGTTACAGCATACCCATGTTACCGGTTTTATTATTATGTTCAATTTCCACT  
CTGATATTCGCGTTTTGGCCGAAGTTACGGCATTCTTTTCTAGCAAGAGCGCTTCAAGG

CGTTGGTTCGTCGTGCTCGAGCGTATCTGGTATGGGCATGCTTGCTGAAAGATATCAAG  
ATGACAAAGAGCGTGGAACGCAATGGGTATCGCGCTCGGTGGATTGGCCCTTGGTGT  
TCTCATCGGCCACCATTGCGCGGTGTAATGTACGAATTCGTTGGGAAATCGGCACCGT  
TCTTGATACTATCCGCCTTGGCACTTGGTGATGGAATTTTACAACCTTCTGGTGCTTCAAC  
CGTCCGTCGTGTACACTGAAGCGGATCCACCATCGTTAAAAACACTAATCACTGATCCT  
TATATCGTTTTGGCTGCTGGTGCAATAACATTCGCCAATATGGGTATCGCTATGCTCGAG  
CCCAGTCTTCCAATTTGGATGATGGATACGATGTGTGCAAGTAGATGGGAACAAGGTG  
CTACGTTTCTGCCTGCAAGCATTAGTTATTTAATTGGAACATAATCTTTTTGGACCGCTTG  
GGCATAGAATGGGCAG

>novel\_circ\_002001

GTGAAACGGGAGGTTGCGGCATCACCGACGACGTGGTGGAGTGGATGGACAGGATAC  
AAAATTCCGCGGAACCGGACGAGGAACGTCCGGTGACCGAGAAGAAATCCGAGCCGC  
CGCCGGTGGCGAAACCGTGGAACGGTGATCAGGAGTCGCCCCGGGCACAAGTATTCGA  
GGGAAGCTAACGAGCCTGGCCACAGGAGGACGCGGAGGGCGACCAGGCCGAAGGAG  
GACAAGAAGAACAACACTTGTTCCCTTTTCATTCAAACCGATCCCCTGATATGGAGAC  
ACATATCGGAACAGTTACACCACGACGCGGAGAAGACCAGGGAGGAGATATTGTCTCT  
GATCGCGCATCACGTACCGCGGTGAATTACATTTACAGAGACACCAGATTTCGACGGG  
AGGATCAAGCATAGAAACATCAAGTTCGAGGTGCAACGGATAAAG

>novel\_circ\_002002

CTCGCCGTTTGAACGAATATATCCGCCACTACGAACCACTCTCTTATCCAACCGAAGAG  
GTCCACCGAGGTCACCTTGAGGGCCAAGAGGTTCGGTTACCCGCGACAATTCGTGACTC  
TGAAGTTTCGCTCGCACGGAAGGGACTTCCACATTCGGTTGAAGCGGGATCTGGCCAC  
CTTTAGCAATAATTTAATTATCGAAGGGCCGTCCGGTCAAACGGAAGACCTCGATACGT  
CCCATATTTACCAGGGCCACTTAGTCGGCGAGCCCGGCAGCCACGTGTTTCGGAAGTAT  
CAGCGACGGCGTTTTCCACGGGAAAATCATATCGCCCCGAGGTGGCGCGTGGTACGTG  
GAAAAGGCGTACTATTACTTCCCGCCGCACGAGATAAATGACACGTTGCATTCCGTCAT  
CTATCATGAGAATAACGTGGACGATCCGTACGCCCATCTTCGAAAAG

>novel\_circ\_002004

CGATCGATCAGAGGACGGTGCCCGAGGAGCTTCCTGTATCCGGCGACCCGTACAACGA  
GACCACGCTGGAGCTGATCTTTCCCGGAAGGCAGCCACGTTTCAAATTGAACGGGAA  
GAGGCTGCAGCTGCTCGAACCTTTGGACAGGGACGACGAGAATCTATCGCACGTGGTT  
TTTCAGTTGAGCTGCACGGTAAAACAGACGAACAAGAAACGGACTATACCGGTGATCG  
TTCGAGTGTCGGACATAAACGACAACGCGCCCAAATTCATCAATACGCCGTACGAGAC  
CACCGTGCCCGAG

>novel\_circ\_002005

TTCAACGGTTTCTCCAGAAGTTCGAACGAATTCGGAATATTGTTTCCTGCATGGTCAGGT  
CAGCTTTCGAAGAATATTCGAGGATCGTTTCGATACTGGTTTCAAAAATTCAGACGTGGA  
AACAGGAATTTTGAAAATATATTAAACGAAGCCAACAAATTGGAAGCCAATCCACGAG  
CAAACACACTCCAACGACATTTGGATGGATGTAAACACGGATAAAGTGAAAAAATTG  
AAGGATCAAAAGTTGCTCGAAACGAATCCATTTTGAACAGAATTACATAACCTGAGA

AATGGATGCCCCGATACAATGGTTGGATGCTAACGAAAATTGACTAAACGAAACCATCGT  
GGCCTGTAAAGAGAATAATTCATTATTCTTTTAAGGGTAGCATCCTGTTCTGCCGAGAA  
ATTCGATCGACGAAACCATAAAAGTTAGCTGAAATCTCGACCCATCCATCCGATATTTT  
ACCGACCGATCATCGTTTACAATTATCTCTTGAAAGAATAAAATACTCGACGAGAGAAG  
CTGTATTCTATCAG

>novel\_circ\_002007

GTGCTTTTATAAATCCGTTTCGTTTTAATGCTGATAACCATGGGATTACCGATATTTTTTTT  
GGAAGTGGCTGTTGGACAGTATTCCGGGCTCGGCCCTAACGAGGCGTTCAAACGTATG  
GCGCCGGCACTCGAGGGCCTCGGTTATTGCACCCTGATCGTCATTCTGCTCGTAATGGT  
CTACTACATGGTGATCGTTGCCTGGACACTCTTCTACACGTTCCCTCTCGTTCCTGCCGA  
AGCTCAGTTGGGCCTACTGCGACAACGATTTCAACACGAACC

>novel\_circ\_002008

GTGCTTTTATAAATCCGTTTCGTTTTAATGCTGATAACCATGGGATTACCGATATTTTTTTT  
GGAAGTGGCTGTTGGACAGTATTCCGGGCTCGGCCCTAACGAGGCGTTCAAACGTATG  
GCGCCGGCACTCGAGGGCCTCGGTTATTGCACCCTGATCGTCATTCTGCTCGTAATGGT  
CTACTACATGGTGATCGTTGCCTGGACACTCTTCTACACGTTCCCTCTCGTTCCTGCCGA  
AGCTCAGTTGGGCCTACTGCGACAACGATTTCAACACGAACCATTGTTACAGCGGGCT  
TCAAGAGATTCAATGTCAAACGGACGATCCGGAAACGATATTTTACAACAAGAGTTGC  
ATATCGGCCAGCCACGTATGCCGGAGCTTCGATTTGACGATGGGAACATCACGCATTG  
TTTCAAAGCTGACAAAGTGGAACCTTTCGAAACCTTTACACACGGATCCTTTTCGTCG  
GAGGAATATTTCAACGACTATGTGCTTGGTATACGAGGAGCTACGTGGGAACACTTCGG  
AGGCGTGAGATGGGAATTGTTAGGATGTCTGACCCTCGCTTGGATAATCTGCTTCTTGT  
GTCTGATGCGCGGCGTTCAATCCATTGGAAAAATCGTCTACTTCACCGCCCTTTTCCCC  
TACGCCATGCTCATAGCGTTGCTGATACGAGGTGTGACGTTGGAAGGTGCCCTGGACG  
GCTCTCTTTGGTTCATCATGCCAAAATGGTCCACCTTGCAATCCACCAATGTCTGGGCG  
GATGCTGCTTCTCAAGTTTTCTATTCCCTCGGTATCGGTTGCGGTTCCCTGATCACGCTC  
TCGAGCTACAGTAACTTCAACAATAATTGTCACAG

>novel\_circ\_002009

GTGCTTTTATAAATCCGTTTCGTTTTAATGCTGATAACCATGGGATTACCGATATTTTTTTT  
GGAAGTGGCTGTTGGACAGTATTCCGGGCTCGGCCCTAACGAGGCGTTCAAACGTATG  
GCGCCGGCACTCGAGGGCCTCGGTTATTGCACCCTGATCGTCATTCTGCTCGTAATGGT  
CTACTACATGGTGATCGTTGCCTGGACACTCTTCTACACGTTCCCTCTCGTTCCTGCCGA  
AGCTCAGTTGGGCCTACTGCGACAACGATTTCAACACGAACCATTGTTACAGCGGGCT  
TCAAGAGATTCAATGTCAAACGGACGATCCGGAAACGATATTTTACAACAAGAGTTGC  
ATATCGGCCAGCCACGTATGCCGGAGCTTCGATTTGACGATGGGAACATCACGCATTG  
TTTCAAAGCTGACAAAGTGGAACCTTTCGAAACCTTTACACACGGATCCTTTTCGTCG  
GAGGAATATTTCAACGACTATGTGCTTGGTATACGAGGAGCTACGTGGGAACACTTCGG  
AGGCGTGAGATGGGAATTGTTAGGATGTCTGACCCTCGCTTGGATAATCTGCTTCTTGT  
GTCTGATGCGCGGCGTTCAATCCATTGGAAAAATCGTCTACTTCACCGCCCTTTTCCCC  
TACGCCATGCTCATAGCGTTGCTGATACGAGGTGTGACGTTGGAAGGTGCCCTGGACG  
GCTCTCTTTGGTTCATCATGCCAAAATGGTCCACCTTGCAATCCACCAATGTCTGGGCG

GATGCTGCTTCTCAAGTTTTCTATTCCCTCGGTATCGGTTGCGGTTCCCTGATCACGCTC  
TCGAGCTACAGTAACTTCAACAATAATTGTCACAGAGACGCGATATTCGTAACCTTTCAC  
GAACTTAGCCACGTCGATTTTCGCCGGTTTCGTCATCTTCTCGATCATGGGATTCCTCGC  
CCGTCAAATGGGGGTTTCGGTCGAGGAAGTGATACAGAGTGGAGCCGCGCTTGCAATC  
ATCGCGTATCCGGAAGCGGTGGTGCGGATGCCGTTGCCCAACGTGTGGGCCGTCCTGT  
TCTTCGTATGCTGTTTCATCCTGGGTATCGGGAGCCAA

>novel\_circ\_002011

ATTGTTACAGCGGGCTTCAAGAGATTCAATGTCAAACGGACGATCCGGAAACGATATTT  
TACAACAAGAGTTGCATATCGGCCAGCCACGTATGCCGGAGCTTCGATTTTCGACGATGG  
GAACATCACGCATTGTTTTCAAAGCTGACAAAGTGGAACCTCTTCGAAACCTTTACACA  
CGGATCCTTTTCGTCTGGAGGAATATTTCAACGACTATGTGCTTGGTATACGAGGAGCTAC  
GTGGGAACACTTCGGAGGCGTGAGATGGGAATTGTTAGGATGTCTGACCCTCGCTTGG  
ATAATCTGCTTCTTGTGTCTGATGCGCGGCGTTCAATCCATTGGAAAAATCGTCTACTTC  
ACCGCCCTTTTCCCCTACGCCATGCTCATAGCGTTGCTGATACGAGGTGTGACGTTGGA  
AGGTGCCCTGGACGGCTCTCTTTGGTTTCATCATGCCAAAATGGTCCACCTTGCAATCCA  
CCAATGTCTGGGCGGATGCTGCTTCTCAAGTTTTCTATTCCCTCGGTATCGGTTGCGGTT  
CCCTGATCACGCTCTCGAGCTACAGTAACTTCAACAATAATTGTCACAG

>novel\_circ\_002012

ATTGTTACAGCGGGCTTCAAGAGATTCAATGTCAAACGGACGATCCGGAAACGATATTT  
TACAACAAGAGTTGCATATCGGCCAGCCACGTATGCCGGAGCTTCGATTTTCGACGATGG  
GAACATCACGCATTGTTTTCAAAGCTGACAAAGTGGAACCTCTTCGAAACCTTTACACA  
CGGATCCTTTTCGTCTGGAGGAATATTTCAACGACTATGTGCTTGGTATACGAGGAGCTAC  
GTGGGAACACTTCGGAGGCGTGAGATGGGAATTGTTAGGATGTCTGACCCTCGCTTGG  
ATAATCTGCTTCTTGTGTCTGATGCGCGGCGTTCAATCCATTGGAAAAATCGTCTACTTC  
ACCGCCCTTTTCCCCTACGCCATGCTCATAGCGTTGCTGATACGAGGTGTGACGTTGGA  
AGGTGCCCTGGACGGCTCTCTTTGGTTTCATCATGCCAAAATGGTCCACCTTGCAATCCA  
CCAATGTCTGGGCGGATGCTGCTTCTCAAGTTTTCTATTCCCTCGGTATCGGTTGCGGTT  
CCCTGATCACGCTCTCGAGCTACAGTAACTTCAACAATAATTGTCACAGAGACGCGATA  
TTCGTAACCTTTCACGAACTTAGCCACGTCGATTTTCGCCGGTTTCGTCATCTTCTCGATC  
ATGGGATTCCCTCGCCCGTCAAATGGGGGTTTCGGTCGAGGAAGTGATACAGAGTGGAG  
CCGCGCTTGCAATCATCGCGTATCCGGAAGCGGTGGTGCGGATGCCGTTGCCCAACGT  
GTGGGCCGTCTCTTTCGTCATGCTGTTTCATCCTGGGTATCGGGAGCCAA

>novel\_circ\_002014

CGACTATGTGCTTGGTATACGAGGAGCTACGTGGGAACACTTCGGAGGCGTGAGATGG  
GAATTGTTAGGATGTCTGACCCTCGCTTGGATAATCTGCTTCTTGTGTCTGATGCGCGG  
CGTTCAATCCATTGGAAAAATCGTCTACTTCACCGCCCTTTTCCCCTACGCCATGCTCAT  
AGCGTTGCTGATACGAGGTGTGACGTTGGAAGGTGCCCTGGACGGCTCTCTTTGGTTTC  
ATCATGCCAAAATGGTCCACCTTGCAATCCACCAATGTCTGGGCGGATGCTGCTTCTCA  
AGTTTTCTATTCCCTCGGTATCGGTTGCGGTTCCCTGATCACGCTCTCGAGCTACAGTAA  
CTTCAACAATAATTGTCACAG

>novel\_circ\_002015

GTGTGACGTTGGAAGGTGCCCTGGACGGCTCTCTTTGGTTCATCATGCCAAAATGGTC  
CACCTTGCAATCCACCAATGTCTGGGCGGATGCTGCTTCTCAAGTTTTCTATTCCCTCG  
GTATCGGTTGCGGTTCCCTGATCACGCTCTCGAGCTACAGTAACTTCAACAATAATTGT  
CACAGAGACGCGATATTCGTAACTTTCACGAACTTAGCCACGTCGATTTTCGCCGGTTT  
CGTCATCTTCTCGATCATGGGATTCCTCGCCCGTCAAATGGGGGTTTCGGTCGAGGAAG  
TGATACAGAGTGGAGCCGCGCTTGCATTCATCGCGTATCCGGAAGCGGTGGTGCGGAT  
GCCGTTGCCCAACGTGTGGGCCGTCTGTTCTTCGTCATGCTGTTTCATCCTGGGTATCG  
GGAGCCAA

>novel\_circ\_002016

AAATTAAAATGCCGATCGATTTTTATCAACTTCCCGGAAGTCCTCCGTGCCGCGCAGTT  
GCGTTGACGGGTGCCGCTCTCGACATCGAGATGAACTTCAAACAGGTCAATTTGATGA  
ACGGGGAACACTTGAAGCCTGAATTTTTAAAGATAAACCCGCAACACACGATACCCAC  
GATTGATGACAATGGTTTCCGTCTGTGGGAAAGTCGAGCCATCATGACGTACTTGGCG  
GACCAATACGGCAAAAATGACACTCTGTATCCGAAAGATCTGAAGAAACGTGCGATCG  
TCAATCAAAGATTGTACTTCGACATGTGCAGTTTATACAAATCGTTCATGGATTATTAC

>novel\_circ\_002017

GGCCGATCGTGACGGCGAGGGCTGTTCTTCAAGGTACGGCGGAATTGCCATGCGACAT  
TCGTCCCCCTCGACAAAATGATTCCGCGATACTAGTGGTTTGGTACAAGAGCGACATCA  
CGCCTATATACAGTTACGACATGAGGGGTAAACAGTCGGAAAAGGATTCGCACTGGAA  
CGATAAGAATCACTTGAACGATCGTGCTTCTTCAGAACGGTTACCGAACCGGCGACG  
TTAAACATCAATCACATCGAAGAAAGGGACGGGGGTGAATACAGGTGTCGGGTAGATT  
TTGCCAAGAGCCCAACCAGAAATTCCAGGATTCATCTGACGGTTATAGTACCGCCGCAT  
AAACCGAATATCATCGACGAGCATGGAACGATTGTACAAACGATAACAGGTCCGTACG  
AAGAGAACGAGGATATGAAATTGCAGTGTCTCGTGTGTCAGGGGGTCGGCCAGAACCGA  
AAGTAAAATGGTGGCGTGGAGAAATGCTTCTCGACTCGACCGACGAGCCGGGAGAAT  
TCCCATCCCTTCGTAGAAACACTTTAATAGTAAAACAACCTTTCAAGGGCTGATCTTCA  
GCTGTATTTATTTGCCAAGCATCCAACAACAATATCAGTCAACCTGTTTCAGCGTCCGTT  
ACCATTGAAATGCATCTGAAGCCAATGTCCGTAACGATATTGAGCAACGATACACCACT  
TAGCGCTGGCCGAAAGTACGATATAAATTGTATAACCGTTGGATCGAGGCCACCGGCCA  
AGTTATCTTGGTACATGAATGGAAAGAAATTGAATAATCACACGGAGAAGGTGTCTCA  
AGATGGAAACACGACCAGTTCCACGTTAATCCTGAAACCAACTTTATCCGATCACGATA  
AAATGATAACTTGTGAGCGGAAAACCTCTAAGATTCAACGAAGTATAATGGAAGATAC  
GTGGAAATTAAACGTATTTTTCGTTCCAATTTTACATCTCAAGCTAGGATCGAATATGAA  
TCCGGACGACATCGAAGAAGGCGATGACGTGTATTTTGAATGCAAGGTCCATGCAAAT  
CCTAATGCTTACAAGGTCATATGGAAACATAACGGAAACGTTATTTCAGAACAATGCGAA  
AAACGGTGTGATAGTGCAGGAGTACAGCTTGGCTCTGAGGAAAGTGAATCGTTCTCAA  
GCAGGCAATTACACTTGTATCGCTAGCAACGTGAGGGAGACGGTTACAGCAATACCG  
TCGAACTTAAAATTATGT

>novel\_circ\_002018

GGTCTTTTCATATGTACAACATGAATCGGGTCTCGGTACGCGCATCAGCAACACCGAG

CTTTCCAAATCCGGGAGAGTAGCGCCGCTCGCGGGAATAGCCTACCAGCGGAGCGGTA  
CTCGCTCTGCCCCGTTTCGTGCGCCAACGAAATATCTTCGACTAGACTGAAATCTTCTTC  
GGGCACCCAATATAAAAAATATGGCGCCTATGTTGCTAGAAATATCTATTAATGTATTGTTT  
TACATATATGTATGCGAGTTGGGACAGATTAAAAACTTTTTTTGCAATATTTGTATAATAT  
TTTTATATTAAGTGTGTATATATGTATACATGAGACATGCGTATAGCAATTATTCGTGAAAT  
GTACAAATTCGGTCTTCATTTTGTTCCTTCTACTTGTATCTAACCTTATATTACGCAC  
AGATTTGATCTCCACTGGCATGGAGCTAGGAGCACATTGATAGTGATAGTCTACAAGAT  
CTTGTTTTCTATGCATTGCCTGCCAAAGAAGAAGTCTGAGCCCAATGTTTCCACACAATTC  
TAGTTCACATGAGATTCTACAGAAACAAATGCCTTCGTACAAAATTCCATG

>novel\_circ\_002020

ATCATAAGATTGTAATAAGAGCAAAAATAAAACGGATGACAAGCTAAGAAAAAATGCA  
CAATCAGTTGGATAACCTAATAAATCAAATGCAACGGCTCATCCAGGATAAAATATGTT  
GAATAGATCCATAATTCTGCAATCAACACATCTGAAGGCTATTCAGATTGATAAAGTTTA  
ATACAAAGATAATGGCAATATCAATAGGGCTATTAATTTGGAAAATGGTAAGTAAAAATT  
TCTAGATTTGTTTTACGATTGATTTATATATATATATATATATATGATCTTGTACTGCTTATCA  
TGTTTTCGAGAAGTAAACAAGGATGCATAGTCCTTCCATACGAATGCTATATAGCAGGT  
CAAATTCATACGATACTAGCAATTGATAATAAGAAAATTTAAATTCAAAAATTTTAATCT  
TACTAATTTAAATAAAAACTAATGAAAACAATGAGTGCGCTTTTTAGCGAATCTCATTCT  
CAACGGAATTTTCTACAGTTTTCATACAAGCCTCAAACCTGACAAAGAAAATTAATAACG  
AAGCGTAGTGAGGAGGTAATAACAGTAGAGCTTTATAGAAGTCAATTTCTATTCCCCCTC  
TTATGTTAAAATTTTTAGAAGAAAATCCTAACGTCACGAATGAAGTCGATTTTTATTCTG  
AATTAATAATTGAAATGGGAAAAATAGACTCGGAAAGATCTTTCCGGGAGGAATAAAAA  
TATCAAGCCAGCCGAAAAAATGATGGACTCACTTAAACCTATTCCAGGAAACGTAAA  
AAACCCATCTATCGAATACAGGCAAATGGGATATTCATATTAGAAAACATTAATTCTAAA  
GTTCAAACCGAGGACTCTCTCATCGAACTTGTTAAAAACGTCAATTCAAGGATTGAG  
ACACGGAAAAAATAATCCAG

>novel\_circ\_002021

GATGCAGTGAAAAATATTGTTTATTAGTGGAATTCACATCCGTGGAATAATTAAACTGC  
AAATTCAATATGCATTTGATCGCATTAATGGAATGCAAAAGATAATATAAAATTTCGATGC  
AATATAGTAAATAGATTGCAAAATTGCCTCGACGACAATGATAATCACATAGAATAAATA  
TTTTTACTAAAAATGATTCGAAAATGGATCAATTCTTTGAGTTCGTATAAAAAATAGAAA  
TTCATTAAATGAAAGTAAGTATTAAAAAATATAATTTTAAATATTTTCAATATACTAAAA  
ATAATCTAATGATTCCAGAATTTTCATAATATATAAGAATTTTTCATTCAATTTTACTGCT  
TCAAGGGAAAAAATTCAACATTATCATATGTGGAGAACGAAGAGGCCATATGTGAAAA  
AATATGCATTTTTTGTGACCGATGATGTGGAGCATATATAAAAT

>novel\_circ\_002022

GATGCAGTGAAAAATATTGTTTATTAGTGGAATTCACATCCGTGGAATAATTAAACTGC  
AAATTCAATATGCATTTGATCGCATTAATGGAATGCAAAAGATAATATAAAATTTCGATGC  
AATATAGTAAATAGATTGCAAAATTGCCTCGACGACAATGATAATCACATAGAATAAATA  
TTTTTACTAAAAATGATTCGAAAATGGATCAATTCTTTGAGTTCGTATAAAAAATAGAAA  
TTCATTAAATGAAAGTAAGTATTAAAAAATATAATTTTAAATATTTTCAATATACTAAAA



ATAATCTAATGATTCCAGAATTTTCATAATATATAAGAATTTTTCATTCAATTTTACTGCT  
TCAAGGGAAAAAATTCAACATTATCATATGTGGAGAACGAAGAGGCCATATGTGAAAA  
AATATGCATTTTTTTGTGACCGATGATGTGGAGCATATATAAAATGTAATGTAAAAATATAA  
AATATACATAAATAACATATAATAGCCATCATATAATTGCAAATATATCGCATTCAATTATCG  
AG

>novel\_circ\_002023

ATGTCTGAGGAGAATCCGGAGATGCGGGAAATGGCAGCGCGTATTTGTCGCGATTATCT  
TCATGGAGTTTGGAAACACGTTACCGCGGAAAACATAATTTGAAACGTATTAGTGGTG  
GATTAAGCAATTGGTTATACAATGTCCAATTACCAGATGAAACTGTCCCGATTTCGAGGT  
GAGCCTCGGCAAGTTTTTGTACGATTGTATGGTCAAATACATGGAGAAAGAGCTTTGG  
AAGGATTGATCACCGAATCGGTGATCTTCACATTATTGTCGGAAAGGCGACTTGGACCC  
AAATTACACGGTATATTTTCTGGCGGTGCAATAGAAGAATATATACCGGCAAGACCGTT  
ACTTACCAAAGAATTGGCGGATCCGACTTTGAGCTGTATGATCGCTGAAAAAATGGCG  
CAGATTCATTGCATGCAAGTTCCCATAGCAAAGAGCCAACTTGGCTTTGGGATACTAT  
GGCTAAATGGTTAGATACGACTAGAGATATTTTAGAGAACATCGAAGATATAGATGTCC  
GGCACTTGAAGAATGTGAACATGATACGAATAATTGATTTAGATCACGAGATTAAATGG  
TTCAG

>novel\_circ\_002024

GCATCCTGATCATTCTACCACTTTGCAGCCGAGGAATGTAGGCGACGAAAGTACAGATC  
AGAATAATAATATAACTATGATGAGTGAAGATCTGCTGCAGCCTGGCCATGTGGTCAAA  
GATCGCTGGAAAGTTGTCAAGAGAATAGGAGGTGGTGGATTGGTGAAATTTATGAAG  
GGGTAGATTTTATGACTAGAGAACAGGTTGCATTGAAGGTAGAATCAGCACGTCAATC  
AAAACAAGTTCTTAAAATGGAAGTGGCAGTATTGAAAAAACTTCAGGGTCGGGAACA  
CGTATGCAGGTTTATAGGTTGTGGTCGTAATGATCGATTCAATTATGTTGTGATGCAATT  
ACAAGGAAAAAATTTGGCTGAATTACGACGTGCTCAGCCTCGAGGTGCTTTTTTCATTG  
TCTACCACTCTACGTTTAGGACTTCAAATTTCTTAAAGCAATTGAAAGTATACATCGTGTA  
GGCTTTCTTCATAGAGATATTAAACCTATGAATAAAATTCATGTACACTATTTAAAAGTC  
AAACTTTTCAATGGGACGACTTCCACATACCTCGAAGTTGGTTTATATGTTAGATTTTGG  
TTTGGCTCGTCAATTTACGACGGGTACTGGTGAAGTTAGACCACCTCGTAGTGCGGCA  
GGATTTAGAGGAACCGTCCGGTACGCATCTGTGAATGCGCATAAAAAATAAAGAAATGG  
GCAGACATGACGATTTGTGGTCATTGTTTTATATGCTAGTAGAATTTGTTAATGGTCAAC  
TTCCATGGCGAAAAATAAAGGATAAAGAACAGGTTGGTCTTATGAAAGAAAAGTACGA  
TCATCGTTTACTTTTAAAACATCTTCCAGCGGATCTTCGTGTATTTCTGGAACATATTCA  
GAGTTTGGGATATGCAGATAAACCAGATTATGCAATGCTGGCAGGTTTATTTGAACGTT  
GCTTGAAACGTAGAGGAGTAAAAGCTACTGATCCCTATGATTGGGAGAAACCATTTATA  
TCGAATGAAAGTTTGCCAATACTAGATCTCTACCTAGTAATCATCAGGTCGCTATGCCT  
CCAGTATTGACCACAGCAACTACGATTAATCAACCACCAACTACACCAAATGTTGACA  
CAAATAATCAAGAAAATGTTGAACCTGATAACAGAAAAGAATTAGACGCACAAATGGA  
TTATGAAAGTATATGTAGAAGAAATAAACAACGAGGAGTAGAAGGATCTTCGGTGCCG  
TTTACATCAGCTATCAGCAATCATGGCCGAGATAAAAATTGTAACGCGACGATACCTAC  
GATGGACAATACTCATCAACAAGCTGGACAACAAGCTCAAGATTCACCTAAAAAGAG  
GCGTGCAGTTTCAATGGCAGCAGAACCACAAACAGGGGTGGTAGACAATGAAGAAGA

TGCATTAATGGCTTCTGCTCGTTCTGCTTCAGAAAGTTCCTCGCAATAAAGTTGGAGTCA  
ATGCTGCAGCACCATTAAGAAAATCTGCAAGTGGTGCAACATTTGCTAGATTACGAGTC  
ACACCTGCAGTTGAAACAGCACCTGGCGAACCTCCCAGTCCTCGAGTACAAACTGAA  
GTTGATGCTTCTTACTGTTTCCTATGATGTTACCAATCCAAAATATGTTGGCAATCAGAGT  
CCTGTTACGGAACAGAGAGAACCATTAAAAAGAGAACCACGAAGAAGAACAGAAGG  
ACGTCAACAGACAAGAATAATCGTGCTGCAATAAGAGATTATTCCATTACACAATTTG  
CACAGATAGATGATGATAATGTATCAGCATTACAACAAGTAATAAGGTGGTGGTGGT  
TTGACACTAGCTTCTCAATGGAAATCACAATTCGATGATTCTGAAGAGACTGATAATGA  
ATGGAAAGGAGAAAAATTTACAAAGTCCTGAACATAAAGGAATTACTATGCCAATTATGG  
TTCCACAGTCAACAGTTGGTAGTGATGCTGTAATACTATCGCAACTTCAGTGCCTGCATCT  
ATCGATGCGAAAACGACAGTAATACAATCAACTATGTCGATTGCGCCTCAACATTCGAT  
AATACCAACTGCTCTCTCTCGAATAAGTGAAGATTCTACAAAGCCTACAGTTCCTCACA  
GGTGTTTAAACATTGCTGGTATTGAAAAATATCCAGATCTCCAAGGCGCACTTCCTCGC  
GCTTGGAGCGTTCTGCAATTGGCACC GCATGTTCTGTGCTTATCTCGAAGCACCATTGGT  
TCAACAAGCTGCATTTGATGATTTACTATATGAAGTCGATGTTATGAGAAATATAGCAAC  
ACGTTATGATGAACCGAGACAAAGTCCTCCGTTACGAAGGGCAAGCGTTCCAGCAGTT  
GCTTTTTCTCCACCCAACACAATACCTAGTACACCTGGAGGAGAAGAAGAAGAGGAA  
GCAGTAGCAGGAAGATTGGAAATTAGAGTAGTGGATGCAACAGGTGGTGGCACTGTTG  
TACAAACAACTGCAGATAGAGAACCATTGCAAAGAAAAATGACAAACGGTACAGTAG  
ATAGCCCAGCTAGTCCAAAACCGAGAAAGAGAAGAATCATCGATATTCGATACTGCTGA  
AAATCGAGCATCTGTTGATGATGTTATGCATAAGGAAAACAGCACTATCACTGCCTCGA  
CAACCATAACCGAATATATTACCACTTCGTGAATATAAGGATGATAAAGAAAAGGAGGCT  
TCTAATAGGACTCATAAATACTGTCAGTAAAATTCCAATTCCGGTTAAAAGTCCTAGATGT  
TCGTTATCGGAGTCAACTCCAGAAACGAATACACAAAATACCCGGAGTGGTGTGGGGA  
ATGAAATAGAAAAATCATCTACACCTGTGGCTATAACCAGGGAAAAAGATGCTA

>novel\_circ\_002025

TCAGAACTTATCAATTGCCGAGATCCGACATTGAAGATCAAACGAAGCAATGGCTACA  
AACAACGAAGATTCCTGCACTTTGTTTCGAGACGCAGTGACGCAGCTGCTTACGCGCT  
TCACAATATGCAAAGGAATGTATGCGGTGAAAACCTGGACGAGCCTCTGTGACAAGATG  
CGGCCCCCGAACAAGGATATCTTCTTTCAATATTTGGCCAACGTGTCTTTCAAAGACGA  
AGCCGGGAATGGATTTCAGATTCGTGGACGCGGTTGACGGACCACCAAGATATTCCATC  
TTGAATTATCAACGAAAAGTGAACGGTTCGTACCATTGGACAGTGATCGGGAACCTACA  
CGT

>novel\_circ\_002026

AAAAGGAAGCAAACGTTTTTGTTCGCCCCTTGTCGGATTACGCGGTGTATAAGATCA  
CAAACACCAGGAAGAGATACGGAGCACCTTCCCGTGGGGCATCTGCCTGAGGCCGA  
CCAGCACCGGCCAACTCAAAACCATCGAGTCTGGAGAAGCCGGACTCAAGGTCATCG  
CTTTCCACAGTGAAAAGTCTCGCGCCTGTTGGCTCACGGCCATGAGACTCGCCAAGTA  
TGGCAAGCAACTGAGAGAAAACCTACAGAGCCTTTAAGAATAAACAGTGCGAACAAAC  
TGACAGCCCAAAGGATCGATACGTCAACTACAACGTGCCCAAC

>novel\_circ\_002028

AACTGTACAGATTGACTGGCGAAGTTCTTGGCGAAGGTGCTTACGCCTCGGTTTCAGAC  
TTGCAGGTCGCTTTACACAGACCTGGAATATGCTGTCAAAATTATTGATAAAATTCCTG  
GTCATGCACGGGCACGTGTATTCAAAGAAGTCGAAACATTTCATCATTGTCAAGGACA  
CCCAAACATTATTCAATTAATCGAGTTTTTCGAAGACGAAGAAAAGTTTTATTTGGTATT  
CGAGAAAGTAAACGGTGGTCAATTGTTGAGCCGGATACAAGAAAGAATTCATTTCAGT  
GAACGAGAAGCAAGTCAGATAATTCAAGAGATCGCAAGCGCGTTAAATTTCTTCATA  
AGAAAGGTATCGCTCACAGGGATCTGAAACCCGAAAACATCTTGTGCGTGTATCCGGA  
TAAGTTAACACCAATTAAAGTGTGCGATTTTGATCTTGGCTCAGGCATAAAATTCAACA  
ACTCATTGTCAAGTCCTGTAGCTACTCCGCAACTTTTAACACCAGTCGGCAGTGCCGAT  
TTCATGGCTCCGGAAGTTGTGGAAGCTTTTATCGGAGAAGCGAATTATTATGACAAACG  
TTGTGATCTCTGGAGCCTTGGCGTGATTATGTACATTCTCCTTTGTGGTTATCCACCTTT  
CTATGGGAATTGCGGCTCCGACTGTGGCTGGGAGAGAGGCGAGAATTGTCAAGCTTGC  
CAAGAGCTTCTATTTACAAGTATTCAGGAGGGCAGGTATGAGTTCCCGGACAACGAGT  
GGAGGTGTATTTTCGGAAGACGCGAAAGATTTGATCAGAGGCCTGCTGGTAAAGGAAG  
CTCATCAAAGGCTTAGCGCCGAGAGTATTCTGAAACATCCGTGGATTAATCCTGGTCCA  
AGTTCCGTGAAAATACCGAAAAATCTCTCACAACCTCCTCATATTATCAGAAGAAACAA  
TTCTGCCAGAGAACTCTCGGCGTTTGCTGAATCGGCTATGGCTGTGAATCGTGTTGTAC  
TTCAACATTTCTCCGTGAATTTGGAGGAATTAGCGGAGAAGAGGGAACCGAGATTGTC  
TACTTCGTCCACGGATGAGGATAACCATCCTTACGGGCACATGTCCGATTCAAGCAGCG  
AATTATCGGAGCACA

>novel\_circ\_002029

AAGATGCAAATTGCAGAGATACCGTGAATTCCACGGGCGAATCTATGAGCGCGGTGCA  
AGCTCGACAAGAAGAAGCTAGGCGCAAAAGACGCAAGAAGAAACGTTCTGGATCATC  
CTTAATGTCTTCTTGCTTCCAAGAACTGTACAGATTGACTGGCGAAGTTCTTGGCGAAG  
GTGCTTACGCCTCGGTTTCAGACTTGCAGGTCGCTTTACACAGACCTGGAATATGCTGTC  
AAAATTATTGATAAAATTCCTGGTCATGCACGGGCACGTGTATTCAAAGAAGTCGAAAC  
ATTTTCATCATTGTCAAGGACACCCAAACATTATTCAATTAATCGAGTTTTTCGAAGACG  
AAGAAAAGTTTTATTTGGTATTCGAGAAAGTAAACGGTGGTCAATTGTTGAGCCGGAT  
ACAAGAAAGAATTCATTTTCAGTGAACGAGAAGCAAGTCAGATAATTCAAGAGATCGCA  
AGCGCGTTAAATTTCTTCATAAGAAAGGTATCGCTCACAGGGATCTGAAACCCGAAA  
ACATCTTGTGCGTGTATCCGGATAAGTTAACACCAATTAAAGTGTGCGATTTTGATCTTG  
GCTCAGGCATAAAATTCAACAACCTCATTGTCAAGTCCTGTAGCTACTCCGCAACTTTTA  
ACACCAGTCGGCAGTGCCGATTTTCATGGCTCCGGAAGTTGTGGAAGCTTTTATCGGAG  
AAGCGAATTATTATGACAAACGTTGTGATCTCTGGAGCCTTGGCGTGATTATGTACATTC  
TCCTTTGTGGTTATCCACCTTTCTATGGGAATTGCGGCTCCGACTGTGGCTGGGAGAGA  
GGCGAGAATTGTCAAGCTTGCCAAGAGCTTCTATTTACAAGTATTCAGGAGGGCAGGT  
ATGAGTTCCCGGACAACGAGTGGAGGTGTATTTTCGGAAGACGCGAAAGATTTGATCAG  
AGGCCTGCTGGTAAAGGAAGCTCATCAAAGGCTTAGCGCCGAGAGTATTCTGAAACAT  
CCGTGGATTAATCCTGGTCCAAGTTCCGTTGAAAATACCGAAAAATCTCTCACAACCTCC  
TCATATTATCAGAAGAAACAATTCTGCCAGAGAACTCTCGGCGTTTGCTGAATCGGCTA  
TGGCTGTGAATCGTGTTGTACTTCAACATTTCTCCGTGAATTTGGAGGAATTAGCGGAG  
AAGAGGGAACCGAGATTGTCTACTTCGTCCACGGATGAGGATAACCATCCTTACGGGC  
ACATGTCCGATTCAAGCAGCGAATTATCGGAGCACA

>novel\_circ\_002030

TGAAATTTATCTTTTAATTCAACTCCTTTAGCAACTGTAACACCATCTTTAGTAATTTTGTG  
GACTACCCCAACTTTGTTCTAAGATAACATTACGTCCTTTTGGACCCATTGTTACTGCAA  
CTGCATCTGCTAAAATATCAACACCTTGCAACATAAGTGCTCTAACTTCTGCACCAAAA  
CGTACATCTTTAGCATATGAACGAGTTTGTAATTGGCGCAAGGCTGCACTTCGCAATAT  
GGTTGGTAATCTGT

>novel\_circ\_002031

CAGGATTGGCACCTTTACTTATTTTTTCAAAACCTTCTTTAGCAATGGCTCTTGCCAAAA  
CTGTAGCTGTAGTTGTACCATCACCTGCCTCTTCATTCGTATTATTTGCTACATCTTGTA  
TAATTTTGCTCCAATATTCTGAAATTTATCTTTTAATTCAACTCCTTTAGCAACTGTAACA  
CCATCTTTAGTAATTTTGT

>novel\_circ\_002032

GTGTTATGTTAGCTGTTGATAAAGTTAAAGATGAATTAAGCCTTAAGTAAGCCAGTA  
ACAACCTCTGAAGAAATTGCACAAGTAGCAACTATTTTCAGCTAATGGAGATAAAGCAA  
TTGGTAATCTTATTTCTGATGCTATGAAAAAAGTTGGAAAAGAAG

>novel\_circ\_002033

GGCAAAGGAAAAAAAAGTGATATTGATCATAGAGCAGACGTAATTAGAGATCAGATTG  
CAAATACAACATCTGACTATGAAAAAGAAAAGTTACAAGAACGTTTGGCAAGGTTAGC  
ATCAGGAGTTGCAGTTCTCAGAGTTGGTGGAAGTAGTGAAGTTGAA

>novel\_circ\_002034

AGAAATCTCCTTCCGTATTTTCGAGAACGCTCGAAGAGTTAGAAGAGAGATGCGCCAAC  
TTCCGTCGCTGCGGATGTTCCACGTGCTGCTCGAGTTCATCGACGCGTTGTGCGACTGC  
GCCCCGTGCTAGGGCCATGTCCTAGCGGCACACTTTCGACCCACCAAACCCACCCACT  
GCCAGAAACAGAGAGACTCCACGAATAAAATAGCTCAAAAATTCTTATTAAATGTGA  
TCCCTCGTCGTCCAAGAGCCATCCACGCCCCGATCGAACCAGATCCCTGAGATGCCGGG  
CGAGGACGGAGCCGGTGGTGGTCGCCTCGAGTGTCTTCCTCGTCGAGTGTGCGCGTCA  
TCCCTTTTTTTGAGCCGCGCGGAGGCCGGCCAAACAAAAAGACTGATATACCGATCCGT  
GTGATGCGGCGCGCGACCTGCTCAACGTCCCCGCAATAAAATGTTGCGCAAGGTGCCA  
CCCTCGAACACGCCGGGCCACCCACGGCGAACGATGGAGCGTCGAAATCGTGCGCC  
AGGCCGACCACGGCCGCCACCCACCTGCCTTCCTTGTTTCTCGGTGACGAGCCCCCCC  
CCATCCTCCCCGACGAGAAGTCGAAGCCTTCTTGAGGGCCAAGGAGAACGTGCCCCG  
TGGTCGTCTCCGAGGCGCCCTCCACGGGACTCGAGGAGAAGCTGTGGAGATCGAAGG  
AGGAGCCACCACCTGCATCGCGGAGGAGCTGAGGCCCAAGAGGGCGAAGGAGGGA  
GGGTCTCGAGCGAGGAGAAGTCGAAGAACGAGCAACAAGCATCGGACGAGAAATC  
GAAGGGTTGGGGCGTCGATCATTGCTCGCAACCGACCTCGTCCAATTTCTCTCCTCAGT  
TCGAGGCGAGCAGAGGCTCCAAGAATTGTTCCAAGTACTCGGCGAAGGAGGCAGGGC  
ACGGGAGAAGCCAGGCGGCGGGTTCGAAGGGTGTTTACAAGTGCTCGTCGAACTCGA  
CGAGTTGCGCCAACTTGCTAGGTCCGCCAAGTCGCAAAGGGTGCTTTGTTCCACCAG  
CCTGAGCAATCTGAACGTGGACAACGGGGGGGCGAGGGATTGCTCGAAGCCGGGGAA

GAAGCACGGGTGCCCCGAGCCGGGAGTTTCTCAAGGAGCAGCATGGAATGCCTGGAAA  
GTCCGTTTCCCAGAGGTCGCAGGGAGTCGCGAGCAAGTCTGGCGGCAGATCCTCCGAT  
CCCAACGACTGCCAGCCTGCCAACCCGTCCATGGATTACAACACCGCCATCTCCGTGA  
TCCAGTCGACCGACGAGCCATGCCAGAAGTCCAAGTACCACGTGGAGAACATGGACA  
TCGTGGACATGGTCGCCACGGCCACCTCCGCCAACAATTGCGAGCAAAGGAACTGCA  
GGGGGGATTTGCGCCACCTCGACACCTGCCAAGGATTGGATGAAGTCTAACGGAGACGC  
GTTGCAGCAGAGCTGCGTCTCCTGTCTGCCGCGAGGATCTTCCCACGGAGCTGCAACTC  
TCCTCGCCGAGGAATTACAGGGAGAAGTGCCGCGACCCGTGGCGGCCACCGAGATG  
GAGAGCAATATCTGCAGCCTGAACGTGTGCCCCGGCGACCAGTATCAGGATACAGGGA  
CGAAGAGGAGGACGGGGCGCTTCTGTGAGGCATTGAGGCATGCGGTGCCTTCGTTGA  
ACCGATTGGACGATTTTTATATGGAGAAGATCGGCGCTGGCTTCTTCTCGGAGGTCTTC  
AAG

>novel\_circ\_002035

AGGGGAAGAGTTACGTATCGAGGAAGAGGATCGAATTGTTTGGATCGGAGGAGAGGA  
GGAGGGAGCCGATGTTTGGTAAAAACAGGAAAAAATGTCGGGTGAGACAGAGGGATA  
GTTTCGTGGCAAGTTCAAGGCTGAGAAGATTTGCGCGGTTCGGCAAACCTGGATTCAATTG  
AGCGTGGACAAATTGAGTGTGAGAGTGCGTGCTCGCCTGGATGAAGTTGCACCGAG  
TTGCTACTGGATGATAGAGAGATAGAGGAATCGTTACGATAGACAGGTGGCTCGGAAG  
AGAGAGAGAGAGAGAGAGAGAGAGAGAGAGAGAAAGAGGAAAAGAAGAGGTTTTCAA  
AAGTGCGGGGAGAGACCGAGACGTCTCTGTATCGGATTCACTTTACTCCAGCCTTTAA  
CTGTCAACCGATCTACAGAACGAAATTCGACAG

>novel\_circ\_002036

CAAGCTCCCCGGAGCCGCGTACGTGCCCATACTTGGGCAAATTTACGGTGACTGGGGT  
GAACCGGAACCAGAGGAACATTCGTGAGAGCCGCAGGAGCCAGCACCAGGAGGGGG  
CCGTCTGTGAGGCGTGACAGGGAGAAAGTTCGACACGCCCAGGAACGTATCCAGGAGG  
ATCGACGGGGCAGGAAGCTCGACTTCGACGTGGAGAAACGCAGGGTGGCCAACAAC  
GAGTACCTCGTCCACGAGCGTATGGGCAGGCGTGCCAGGTCTGAACCGCAACAACAGA  
AACCATAGGGAGCACAGCCTGGAGGAGGCGTCTGCGAAGAGGAGCCTGGACATCGAG  
GATTTGTTGCGGGATCGTGCGAGATCGAAGGTGAGAAGGTCCGAGGAGCAAGGCTCG  
ACGAGGTCTGAAGGTGAGAAGGGTGCGCGAGATCGGGGTGAACAGGTCTGAGGAGAAA  
GATGGAGGACTTTGGGATGGACGCGGATAATTCGCGCGAATCAGGCAATTCTGGACG  
ACCGATTTCTGACGACAGTGACGGGTCCAGCATGCTCGAGGTGCAGGAGGATTATTTCTG  
GCGATTACCCGGACACCGCCGACCTGCCCAAGAAGAGGTCGGGCAGGGGAGGGAATA  
TTTTGACGAGGAGGAGGAGGAGGAGGAAGAGGAGGAGGAGGAGAAACGTGGAGGAGCT  
GGATTCCGGCAATCGGTTCGTTTCGAAAAAAGGGAGAAGAGGGAGGAGGATGTGTCCAG  
ATGCAGCTCGGAGGTTACCACCATCACTATCGGGTGCTCCACCGCGGATAGAATGGAAT  
TCCAGACGGATTGCGTCGACGACAATGCTATTGCTTACTCCTGCCACGGTAGGTGGTTC  
GACGCCGAGGGAACCAATTCGTGATCGCTACCCAACCTGGCACCTGGAACCTGGCTGGT  
CGAACGAGAACAACAGGCCCAACCGTACAGGAACAGCCGTAGACTGTGCTTCATGT  
ACAAAGAGAGCGGCGGTGTTGTCAGTTTGACTGCCAGCGAGGTGGCCTGCCAGAGGG  
GAATACCCCCACCCCCGCCAATGTTGGCCTTCAATGCTACCAGTACCG

>novel\_circ\_002037

GTGGGGATGAAGCGCGTGTGCGGAGGGCGAGAGGAAGCGGACGCGGAGCATTACCG  
AGCCTCATCCTCGCTAATGGAACGCCCTTGTCGAGAGTGTACCCACCTCGCGCGGGCT  
GGCCAGTGCGGATCAACGAGGCGACACTTACTACCCGAGTCAGTCAATTCATTATCA  
GCAGCAACAACAACATCACCACCACCAGAATCAGCATACATCGAGTCCAAGCACACA  
GAGAGCTGTGCAACAATGGGCTAGCGAGCGGGCAACATCGTCGGTTTTGTGCGTTGGT  
CGTTCCGCATCACCATCCTCGCCAGAAACAGCAAGGAGACCGGGAACAGGATCGTCTA  
GAAGAGTTTTCTCGTCGTCGAGTCGAGTTAGGCCAGGAGGCGGAGGTGGGGGTGACG  
GAAGGGGAGCAGAAAGAAGCACAGAGATCGGTAACGGTATCAATTTACGAATCACT  
GGCAGGAGGAAGAAGAGCTGGAGGCGAAGAAGAAGGAGGAGCACGGACGGAAGCG  
TTGCGTGACACAGCGGCGCATTGTCAAGCCGAGCATCTTGAAGTGAAGGTCGGCC  
GATGTCGAAAACAATGCGATCGCGCCGCTCTCGCGGCCACCTCCTCGCAGACGAAC  
GTAAATGACACCACCGATGCCGTAGCGAACAGCAACGTTGACGATGGAGAAGCGCATT  
CCGTTCAAATGTACACCACCACTGGTCGCGTCCATGATCACAATCGGCCGTTTCTCCG  
CCAAGATTGCCGACCGTGCACGTTGCCACTGCCTCGACAGCGCCCCCTCTCGCGGCAT  
CGTCGAATCCGAGAGTGTGGTACAGCTCCGCTCAGTCCACTCTCGAACACCTTCCG  
AAGCAGACCGAGAAACGTGGATACATCGACGGGCGAGACGAATGCGCGGGGATTGGT  
ATCGAACGACACGCCACCTAGAAGTCCTATAAGCGAAGTGAGTTTGACCGTGCCAGG  
CCAGACGGAGAGAGGGCGATCAACGAATACGTGAGGCGCCGTTCAAACATAGCAAC  
CAACAGGAGCGACGGGTCTTCGAGGATGAGAACAACGGGGGATCGGTGCCGATTGC  
CCGAAGATCGACAGGAGGCATCGGCAGAAAGGTGGTGATGCGTCCGTGCGGGCGACG  
CATCGGCTGCACGCGAGCAGGACTCAAGCGTTTCGTGGTTTGATCGCGAGCAGTGGG  
ACGAATGCGACCGCGTCCGAGGCTCGATCGCCGCGAACACCGCGACACCGAATGCG  
GTGACCAAGCAGCCGGTCTCGTTCACCAAAGAACCGGCTAATAGCCTCGTTCTAGGA  
CTTATGATCCGGCCGGTTTGTGATAATGTGCAATTTCTGCGGTAGATGTCGTTGCGAGT  
CTTGTGCGGAACCGCCTCCATTGCCAGCAAATGGCTGTGCGACAACAAGTGTTCGTG  
TTCCGCCGATACGATTCTCGATTACGCTTCTTGCCCTGTGCTGCGTGAAAGGACTGTTTTA  
TCATTGCGTAGACGGGAATGGGTCAGGTGGAATCGATGGGGAGGCGGCTGCTAGTTGT  
GCGGACGAGCCGTGCTCCTGTACGGGAAATAGGAGAGTCTCCAGGTGGGCCTGCCTC  
GGCGCCTTGACACTCGTCATGCCCTGCTTATTGTGCTACTGGCCGTTCAAAGGATGTGT  
CGCGGCATGTGAGGTGTGTTATGCACGGCACGCAGCCCAGGGATGCAGATGTAATCCG  
AACACGACTGGGAACGCCGGAACAGACATCATCCGATCGCGAACGATATCGGGGATT  
CGAGGGATCCGGAGAAAAGGTTACTCGACCTGTACGCCGGAACCTTAATTGGAAG  
AGATACGACAACGCAGTAATACCAATACCACCCGCAGTGTTATCTCTCACGTAGGGGG  
GGACACAAAAATTGCTCTTCTACGCACAGAGATTGTCCGACAGGAGAGGGGAGCAAA  
AACGAAAATTGCATTAAGTACAAGAGTTGCATTTAAGTCGAGAAACGATAATCGAGAA  
TGACGAATTTGTACGTCTAACGTCGCGAGTGTTTTATTATTATTCTTCCATGCGCGCGC  
GAAAATGCGAAGCGAGCGAGAGAGATTGAGAGAGCAAGAAAGAAAGAACGAATGGA  
AGAACGCGAGATCGTGTCACGGGGGAGGGAGATGATGCTAAAAAGGATATAGTGGCGT  
AGGAAAGATGATAGAATGATAGCGAGGAGAAAGGGCGAGAAAGATGACAAGGTACGC  
GAGCTTGCGTATTAACGCAGAAACATAACCACTTACGTATAGATAGGTCTATACACGATAG  
AATATATAAATAGTACCGCGCACACACAGAGAACGAGTGCGAGCGTGACCAAGCGAAT  
GTGTGGAACGTGAACGTGAGAGAGTGAGAGAGTGAATAGAAGAACCCTAAAGTATA  
TTAAACGCGAGCACGTGTACGCGCGTATACACGCGTTTCTGCTGTTACTTCTTGCTTGA

AGCGCGTGTATGCGCGCATCTACACTTAGATTATAGATATGTATATTGTATATTATATTTGT  
ATAAAGAAAAATCTTTTCTACGGTTAATTTATTCGTGGCTGAATTGCCAAGTAACACATA  
TATAAAGTTTCGCAGTAAGAGGAGCACGACACGGAGAAAAGAGGGCGAGACGAGAGA  
AGGCCGAGCGAAGACTGGGATTATTTGCAAAAATTATTTCCAGTCTCTCACCGCTGCGA  
TAGGAAACGCATAAAGAGTATCGGCCGTAAAGAGGAAGAAAGAGGGGAAAGAAAGC  
AGGAAAGGGCGGGGCAGGGGGAAGGAAAGCTCTGAAAAGAAGCATTGTCCGTATTTTC  
CGAATGTTTTCTCGGCATATGATGTATACGCTTTTATACTCGTTAACAGTGGAATTGTAT  
CGAGCGCGCGAGGCCCTGTCGAGCGTTAGAGAGCGTGATATGACACGAGATCGAGATA  
ATGCACGCGCGTTTCGGGTGCGTGAGAGCGAGAGAACTGTAAATCTGTAAGAATGAAC  
GTTTGCGTTTATGTGTGTATGTTAAGTATGTATGCGTATGTGGGTGTGCTTCATGGGGTC  
GACGAGAATGCGGGCAGATGGAAAAAGGACAATTGCGTGGGGGGCATAAGCGCGAGG  
AGAAGAAAACACAGATCAGGAGGAGGGAGTGGGGAGAAAGAGCAACGCACGCCTGA  
AATCTCTTCTAC

>novel\_circ\_002038

ATCGCGAGAAAACGGATGATGACCGTGCGACGACCCCGGAGTCGCTTCGCAGTAGCA  
GCCCCGGCCTCGTCTCCACCCCCTCAATGGCAATCGACGAACACACCGAGTAACACGCC  
GCCCAGACGATTTATCTCGAGTATCCTCGGTGGGGATATCCCGTACGGAAGCAGGGGTC  
ACGTTCTAACCAGGGCGGAGCGCAAGGAGTACAGCAATCCCCAATCGCGCCCCCGTC  
CAGTGATGCTACGCAATTCCTCGCTAAATCGGAAAAATTGGTGTTGCCAGACCAACC  
ACCCCTCCGAAAGCGCCCAGGGTCGAGCCGCCACACGGGTCTCGGTCAATCAAAGG  
GTCCCTCCTTCCCAAAGTCAATCGAGGAGGGAAGACAAGATCGAGGTGCCACAACT  
CAAGAGCCGGAACAAGAGCAGCCTATCGATTACGCGGTGCCGAAGAGAAAGGAAGA  
GGACGAGGAGCGAGGCCGCGAAGGCGCAAAAGTGTACGCGCCGCGATAGGCAACT  
CGATTGCCAGGCCTCTGCTGGCCATGAGACTGTCCGGTCCCCAAGTGGTCCACGCGGC  
CGCAGGCCACGGAAGATCGTCGAATTCGCGCGGGAGCGGCGGTTCGGGTCCGGCAA  
CACCTCCAGCGGCGGCGGCGGCAACTCGGGAGGCGGTTTCCTCCTCCTCCTCCTCG  
AATTCGGGCGGAAGTGCGGTTACTGCGGGGGAGGAGCGGCCACTGGCGGTGGAGGT  
GGTGGTGGAGGTGGTGGCGGAGGTGCCGTGGGCGGAGGTGCGGGCGGCGGGATGAA  
TCCCGGAGGAAACGGGGGCCGGGGAATTACGGGGCCAAGCTCGCCGCCACCGGCTC  
CCTGCCGCCGTTCTACGAGTCGCTCAAAGGCGGCAATAATCTGGCGAATTTTCGCGAAT  
CAGTACAACACCACTCAAGGAAATGGATACCTGACACCATCGCCAACGGTGGGGATGG  
AATGCGACACCGGTCAGCAGGACGTGAATCGCAGCATTCCCAATACAACGCTCAAG  
AAGGGAAGCAATACTCCCTGTTGCAAAATGTCTGCGCCTCGTACGGTTTAACGTTGAA  
GGAGGAAGAAGATTTGTCCCCGTACAAGATCCAAGCGAACGATCTGCTGTCCGGACAA  
TATGGCGCATACGACATGACCGATACGGGAATGATGGTGGACATGGTGACTGGCGCTGT  
TGTGGATCCTCTTCAATTCACCGCCACTCTAACGTTTCAGCTCACCTTCCGATCATAACG  
CCCTCTTGGAAGCCTGAGCGACGCTGCCGACCTATTCCTGCCGAGATTACCGGCCGA  
AGATGGTAGCAACGATCTTCTCGAAGAATCGTTGCATTCGCCTGCTTCGGCTGGGAGC  
GGGATCGGCCAGGATAACGGGCAAATGACCACTCCTGTAGAGCCGAGCGTCGATCCTT  
TCCCAGAGCATAGCATGGCCTTGACTAGAAGCTTCGATACGTCGAGGCACTATACGGCA  
GCTCCTCAACATTTTCAGCACTTCGAAATTAGGACTAACTTATGCTACAGGCGAATCGAG  
TTATCAATCCGTTTCAAAGAAGCGGCCGAACCTCGCGCTTCACATTAATCAGAATCATC  
AACACCAATCCGAACCACAGCTGCAACAATTGCAGATACAGGTGCAGTTGCAGCAAC

AACAACAGCAACAACAACAACGTCCACTTCACCTCATCAACAACAACATCAAGGATT  
ACTCAGCCCCGGGATTAAGCTTCACCGGTAGTGGTCTGGAAGTAGATTACAGGTAGTAGC  
GTGGGTGGAAGTTTACCAAGTCCCGGAGCAGCGAGCTGTTTCGTTAGACGCTGCTTCTA  
CTAGTACGTCGCCATCTTGCGCTTTGATGGAGCATGCGCCTAGCCCAGCAGCCACTGTA  
TCTTCGGCATCGGTAAATACTGTACAATCGACAGGTCCAGCCGGAGAACCACCACTGA  
CGAACGGGTGCGGTGTACTGCAGCAAAGGCTGGGATTACCTGGTGACTGTCAATTGGA  
GTTTCGTGAACGGTGGCCACGGAATTAATAATCCACTCGCGATTGAGGGTCAGAGACA  
GGCAGCGGCTAATCGCGAGGAAGAGAGAGCAGCTCGACCTCCGCCTGGCAAGGACGA  
CGATCCAAATCGTTTTACGTGCCGTGTGTGCAGCAAAAATTTACGTCTGCAACGATTGT  
TGAATCGTCACATGAAATGCCACAGTGATGTGAAACGTTATTTATGCACATTCTGCGGT  
AAAGGCTTCAATGATACATTTGATTTGAAGAGGCATACTAGAACGCACACTGGTGTTCG  
ACCATATAAATGCAATCTTTGTGAAAAGAGCTTTACCCAGAGGTGTTCTTGGAAGTC  
ATTGTCTTAAAGTTCATGGTGTTCACATCAATATGCCTATAAAGAACGTGCAACAAAG  
GTATACGTGTGTGAAGAATGTGGTCATACGACACAGGAACCGGAGGTTCACTACCTAC  
ATTTGAAAGATAAGCATCCATACAGCCCGGCTTTGTTGAAATTTTACGATAAGCGACAT  
TTCAAGTTTACCAACAGCAATTCGCCAACATGCTGCTCCAG

>novel\_circ\_002039

CCATTTACAATTGGCGGAGAGACACACGATATGGTCTCCCTTTGGAAATTGGAGAAAC  
GGTGCAGATTCTGGAGGAATGCGCAGGCTGGTATAGAGGCTTCTCGATCAAGAATCGC  
GCAGTCAAAGGAATCTTTCCCAGCACATACGTCCATCTGAAACCATGCAAAATCGAGA  
ATGAGGGTTTGTTCGAGTCGGTGATACCTCTGGAGGATCCGGTAGTACGAGAAGTCAC  
CCTCGTGCTTCGAGAATGGGGCGGAATATGGAAGAGGCTCTATGTGGAAGGGAGACC  
TACAAATTCAACACATTGCGCAAAGTAATGCGGGAATTGCTGGAATGGCGGCGTCAAC  
TTTTGGCCGGTACTCTTACCACCGATCAAACACGGGAGCTCAAGTTGCGAATAATCAA  
CAAAGTGGACTGGGGAAATCG

>novel\_circ\_002041

ATAAATAATGCCAGAAGAAAAATCTATAAAGATGATTCCGCAAGAAAAAAATCTTGA  
AAATGGCCAAAGTGACTTTAACCAAATAAAAATCAATTCGAAAATGAATGAGAAGAGG  
ATGGAATAAAAACAATGGATGACAAACGGAGGATAGACCGATTCTGTGGTTTCGCGAGA  
CGAAGCCTAATAAAAACGTTAGAAACCTACCGTGAGATGTTTCAAGTTTCGAGCCGGC  
TGGTGGCGCCAGGCTACGCTACATTCTGTCCAGGGGTAGCTCGGTCTATATGCCGATCT  
CGGTGTGGAGGGGAGGCTTGTGCCGGGATATCGCACACAGACACTGTAAATCAAATT  
CTACACCGACTCACATTTGTAGGGATGGCGCAGCTCGAACTGGTCACCGAGCGGAAGG  
AGAAAAGGATTATAGGGACACAATGGAAGAGCGAGCGAGATAAGTGGACGAGGATGA  
ACCGAGGAGAGGGGTAGGTTGACCCTGCCGGGTCAAGAGAGAGACAGTCGTATCGTA  
GGAAAAGGGACAGCTACAAAGGTGTAATTCGATTCCGTTCTCAGATAACAAAGCGAGC  
TGCATGGAGTTAGAAAAGGAAAAGGACGCAATGAGCGAAGCAGGTTGATTGCGGGAG  
AAAGATGCAAGGAGGGAGGGGTTGGCCGACCCTGAGCAAGTGGACGAATACCAATCG  
CCAG

>novel\_circ\_002042

GAGCGAACGGAATGCGCAGGCGCGGCCCGCCAGACCTATACGCGCTACCAGACGCTCG



AACTGGAGAAGGAATTCCACACGAACCACTACCTCACCAGGCGGAGGCGGATCGAGA  
TGGCACACTCGCTCTGCCTGACGGAACGGCAGATCAAGATCTGGTTCCAGAATCGGCG  
GATGAAGCTGAAGAAGGAGATACAGGCGATCAAGGAGCTGAACGAACAGGAGAAGC  
AGGCGCAGGCGCAGAAGGCAGCGGCAGCAGCGGCCGCGGCTGCGCATCAGCAGCAA  
GCGGCCGGTGGGGGACCGGAGGGGGGCAACTAGGGGTACGCCCTGCACCGGAGCCCC  
CCTGACCACCCACCAATCCACACCACCTCTGCTAGCACCGCAATGTACACAGC  
TATATTAAAG

>novel\_circ\_002043

GTTAGATAGAGACCTGTTACGTGTTTTGGTTCTCTACATGTAAATTTCTTTGTTACGTCT  
TTGTTTGGAGAGATAAATTATTGTTAAGAGTGTATTACAATGTTAATGAATCATGCTCA  
AGTATATTTCAAGTATATTTTCGTGGATATGAAGTGTGGATAAGATGCTTGATAAAAAGAT  
GCTTCGCTGGAGAATAATATAGCTGCAAATACCTTTTTTCTTTTTTTCTTTTCATACACAG  
TTAGAGTAGAGTTTTCTAATCTTAAGAGTGAATCGCATCAGATACCGCTTTAAATTAGAA  
CATTTTTAACCTTAAGGTGGGTAGAATAATTTCCATGTTAACGTCAATCGATGACCATGT  
AACCATGCATTACTTAAACTGCTTCAACGTATGTTACACACAGGATACGTTTCAACTT  
TCATACAATGCTAACCTAACATTAACGAGGATGTCAAAGATGGAAGGCCACTTGATCTT  
GAAGAAGTAAATGTCACAGATGAAGAAGTAGGATGTCTAGCTTTAGGGTTACGCAGTG  
TTGTACATCCTCCCCTTGCCGTCTAATTTGCATCCACAGCGATTAACATAATCTGTATC  
CCGAATATTTATTTGGAATTAGCCTTGCTCGTAACTCATGCAGGAATTAGTTAAG  
CTCAAGGATTTCTGGGCTTACCAATCCCTCCCTCTTTCAAGCTGCTGCCTTCACCTTCTC  
CTCCTCCTTCTCCACCGTTATCGCGGAATCCTTTCACCTCCTGTAAACCCTTCACCCCG  
CCACAGGATCCCGTGACGCGTTTTAAACAAACAAACAGTCAACAGAGATAACTCTGG  
GACGTAAATCATCGGTATATACCTTCCGGCTTCACCGGTTCCCCTCCATGCTTTTTTAC  
CAAGCCTGGCTAGGAGTGATCCTTAATTGCCCCGCCAATATGGGAGTCGACGGCGCAA  
AAACTTGTTACTCATCGAGGTAAATGGCGAGATCTCTCGTTCCAATCTCCCTTATTTAT  
TATATCAATTTATCGACTGATCTTTCAAACGTTTGAATAATTCAATTTATTATTTCCCATC  
CAGAGTAGCGAAGCGAGAAGAGGAAAAATTCGAATTTCTTTCTAACCTTTAAAATTCG  
AATCTACGTATCTTTAACGCACAACCAAGTTATTCTGTATTTATCGCCATTGTGGTGTCA  
CCGATCACGAAATTCGAATGCGAAAACGAAGAAGCAAATTCGTCCTGCTTTGCGGATC  
GAAGGGGGTTTGGCAAGAAGTTTGGCCAGGCATTGATCCCATATAAACCCATCCCGC  
GGATTACACGGGTGTGTGCGCGTGTTTTGGTCGGAGGCGAGGCAAAAAGGGCCCCAA  
GGCAA

>novel\_circ\_002044

GTGCGGCACAACCTTCGTTAGCAGGGTGGACAGAGGAACGGAACGTGTCTGGAGCGGC  
TTGGCGTTTTGAACGAAGGTACCAAAAAACGAACGAAGGAGAACTCTGAGATATCAC  
CGTCTTTAACCAACCCCCCTCGTGTACAAGTTTCAAAACAACAACTCGATCATTCTCCC  
AAAATTCATAACTCGCTCTCATTATTAATAGGTTCTCTAGTAGTAGTAGTGCTCCAGTTT  
CTTTCTTTTCGTTTCTGTAAACGAATAAAAATAAATGGGATATCCGAGTGTGATATAAAA  
CAACGGGCAGGAGAAAAAGAAAGGAGTGGGAGGGAGAAGGGGAAGAGAGGGACAC  
GAAGGAAGGAGTAATAATAATAATAATAATAATAATAATAATAATTCTACAAGTGATT  
TCCAAGTGATGTCGGTGTGATACGAGTGTTCGCGTGTGTACGAAAGTGTGTCGTGGA  
GGGGGGAGGAGGAGGAGGAGATGTTTCGTGTATAAATAGAAGAGGAGAGAAAAAAA

AAAATCACCCATGTATACGTAAATAAGGACGTGTGTGTCGCAGTGTGTCCGAGTATTCG  
AGTACAAAAGAAGAATATTACGATAAAAATAAATAAAACCAACACATAGAAAACCACG  
ATAAGAAAGAAACGAGAGAGAGAGAGAGAGAGAGAGAAAGAAACCGAGCAAGAGTCG  
TTATAGGGGGGGGAGAGAAAAGAGAGGGGAGATCCCTCGAAGCGTGAAAGACTCGA  
AGGAAGGAGAAAGAGAGGAAGACTCGTGACTCGTGATAAACAATAATAGAAGAAAGA  
AGAAGAAAAAAGAGGGGGGGCCGAGGTGGAATCAGAAGGTGGGCCAGGTGGGA  
CAGTAGCATGAGTTCGTATTTTCGCGAATTCGTACATCCCGGACCTGCGTAATGGCGGGG  
TGGAACACCCGCATCAGCATCAGCAGCACTACGGTGCGGCCGTCCAGGTGCCCCAGC  
AGACGCAGTCGGTGACAGCAACAGTCCCAGCAGGCCGGGGACCCGTGCGACCCGAGC  
CTGCTACGCCAGGGCGTGCCCGGCCACCATTACGGGGCGGCGGGCAGCCAGCAAGAC  
ATGCCTTATCCGAGGTTCCCGCCCTACAACCGGATGGACATGCGTAACGCGACGTATTA  
TCAGCACCAACAGGACCACGGGAGCGGGATGGACGGGATGGGTGGTTACAGGTCGGC  
GTCGCCGAGCCCTGGCATGGGCCACATGGGGCACACGCCGACCCCTAACGGGCACCC  
GTCCACCCCGATCGTGTACGCGAGCTGCAAGCTGCAGGCGGCGGGCGGTTCGATACCA  
GGGGAGCGTGCTCGACGGGCCGGACAGCCCGCCGCTGGTTCGAGTCGCAGATGCACCA  
CCAAATGCACACGCAACACCCCCACATGCAGCCGCAGCAGGGCCAGCACCAGTCGCA  
AGCACAGCAGCAGCATCTTCAGGCGCAGCAGCAGCACATGATGTACCAGCAGCAGCA  
GCAGTCGCAGGCGGCCCTCGCAACAGTCGCAGCCAGGCATGCACCCGCAACAGCAGCA  
GCAAGCTCAGCAACACCAAGGGGTGGTCACGTCGCCGCTAAGCCAGCAGCAACAGGC  
CGCGCCTCAGGGCGCGGCAAGCGCCAACCTACCGAGCCCTCTGTACCCGTGGATGAG  
AAGTCAATTCG

>novel\_circ\_002045

GGAGGCGGCGGCACGTGCGCCGGAGCTGCGGGCCAGGTGGTGGAGCTCGTGCCGCTG  
TTGAGGGGACAGCGGCGGGGGTGGGAGGCTGCGCGGCGGGCGGAGGGGGCGGGCGAG  
GGCAGGAGGAAGAGGAAGGGAGGATGCGAGGAGGCGGGAGGGGGGGCGAGCGCGG  
CCGAGGAGGTTAGTCGCTCGCCGGTGGCGGATGGCGACGAGGCCTGCCGCGGCGACA  
GCGCCACCATCGACTGCCGCCACCGCGTCTCACCTCCACCGCGCGCACCAACGTCG  
CATGCACGCCCACCGTCAACAACACCGGGAACAACAGGGATCGCCGGATCGATGGGA  
GGAGGAGGAGGAGGAGGAGCGGAGGGACGAGGCGGGTAGCGGGAGCGAGGAGCGG  
CAGCTCGTCGCCGACGAGGAAGCCGTCGCCTCCCCCCTCGCCGCCGGGAGATCCATC  
GCCACCATTGCCACCGCTTGCGCCACCACTGCTACCACCACCACCATCACACAACAA  
CAACAACAACAACAATCATCGTCGCCGCCGTGCGCAACACCACCATCTTCGCCAC  
CATCACCGTTGCCGCCACCACCACCACCACCACCACCACCACCACCATCACACC  
ATCACACCACCACCACCATCACCATCCCCATCTCCACCACCGGCCCCGGGACGACAGACC  
CCCCTGCGAACGGGACCAGCGGTGCGTGACCGAGCACTGGCCCCTGCGCCCAGGGA  
CGAGCGCAATAAAGCCGATGCCACCGACGAAAAATACCCTGCCACCGTCACTGCCATG  
ACGAGGGGATGCAGGATCCCGCCCTACCTCGCCACGCTACTCATCCTGTCTTACTCT  
CTTCGGTATAGCAGACGCCTGTTTCATCGCGGTCGACGCCGAAACCGCGGCCACCGACG  
CCGACGCCTCGACCGAATATCACATTCCACATGTACACGTGTCCACCGGATTACGCCGA  
GTACTACTGCTTGAACGGTGCCACGTGTTTACTGTCAAATCGTCGATTCCTCCTTT  
ACAATTGTTT

>novel\_circ\_002046

GGAGGCGGCGGCACGTGCGCCGGAGCTGCGGGCCAGGTGGTGGAGCTCGTGCCGCTG  
TTGAGGGGACAGCGGCGGGGGTGGGAGGCTGCGCGGCGGGCGGAGGGGCGGGCGAG  
GGCAGGAGGAAGAGGAAGGGAGGATGCGAGGAGGCGGGAGGGGGGGCGAGCGCGG  
CCGAGGAGGTTAGTCGCTCGCCGGTGGCGGATGGCGACGAGGCCTGCCGCGGCGACA  
GCGCCACCATCGACTGCCGCCACCGCCGTCCTCACCTCCACCGCGCGCACCAACGTCG  
CATGCACGCCCACCGTCAACAACACCGGGAACAACAGGGATCGCCGGATCGATGGGA  
GGAGGAGGAGGAGGAGGAGCGGAGGGACGAGGCGGGTAGCGGGAGCGAGGAGCGG  
CAGCTCGTCGCCGACGAGGAAGCCGTGCCTCCCCCCTCGCCGCCGGGAGATCCATC  
GCCACCATTGCCACCGCTTGCGCCACCACTGCTACCACCACCACCATCACAACAACAA  
CAACAACAACAACAACAATCATCGTCGCCGCCGTGCGCAACACCACCATCTTCGCCAC  
CATCACCGTTGCCGCCACCACCACCACCACCACCACCACCACCACCACCACCACCACC  
ATCACCAACCACCACCATCACCATCCCCATCTCCACCACCGGCCCCGGGACGACAGACC  
CCCCTGCGAACGGGACCAGCGGTGCGTGGACCGAGCACTGGCCCCCTGCGCCCAGGGA  
CGAGCGCAATAAAGCCGATGCCACCGACGAAAAATACCCTGCCACCGTCACTGCCATG  
ACGAGGGGATGCAGGATCCCGCCCTACCTCGCCACGCTACTCATCCTGTCTTACACTCT  
CTTCGGTATAGCAG

>novel\_circ\_002047

GATATGCAAATGCAAAAATTTATAAATGTGATAATGAGAAATGTCCAAGACCAGGATGT  
TATATATCTGGAGGATCAAGCAAAGATGATTCATTTCCCTTGTTTACGACCAGTTTGCTCT  
GGACGATTTCAACTTGTACGTCATGTATCCTTTGTTGATTGTCCAGGTCATGATATTCTTA  
TGGCAACTATGTTGAATGGAGCAGCTGTCATGGATGCGGCATTACTTTTAATTGCTGGC  
AATGAATCATGTCTCAGCCTCAAACATCAGAACATTTGGCTGCTATTGAAATTATGAA  
ACTAAAACATATTGTAATTTTACAAAATAAAATAGATTTAGTAAAGGAAGCTCAAGCAA  
AAGAGCAATATGAACAAATTTTAAAATTTGTACAAGGTACAGTAGCTGAAGGAGCACC  
TGTAATACCAATTTCCGCACAACCTTAAATATAATATTGAAGTCTTATGTGAATATATTACA  
AAGAAAATTCAGTACCTTTAAGAGATTTCACTTCAGAACCGAGATTAATTGTAATTCG  
ATCATTTGACGTAAATAAGCCTGGTTGTGAAGTAGATGATTTGAAAGGTGGTGTGCTG  
GAGGAAGTATTTTAAGAGGAGTATTAAGAGTGGGTATGGAAATTGAAGTCCGCCCTGG  
ATTAGTATCGAAAGATAGTGAAGGAAAATTGACTTGTGCGACCCATTTTTTCACGGATAG  
TGTCATTATTTGCTGAACAAAATGAACTTCAATTTGCTGTTCCTGGAGGTCTTATTG

>novel\_circ\_002048

GTGAATCAAATGTTTACACATTAGGCAATATTGGTGCACATAGAATTGTATGCACAAAA  
CTACCAACTGTAGGTCATACAAGAGAAGCAATGACTGCAGCAGGAAATACAACCTACCA  
GATTATTAGGTACGTTTCAAAGGTTGATTTTGTTTTCTTAATTGGAATTGGAGGAGGTG  
TACCACATTACACAGATTATAATAAACATGTACGACTTGGTGATGTGGTTATATCTTATCC  
TACTCCTTTAAATAATAAATATATCTATGTTTATTGTGAAAGTGCAAAGACAAATGAAAA  
TGGTGATTATCATTTTGAAACCAAAGAATATTGTCCACCAAATTTATGCCTTCAAGAAAT  
CGCTGCTAATCTTAAACATCAGTCGGAAAATGAATCAAATCCTCCATGGCAAACATACT  
TGAAAGAAGGTTTAGATAATTTGACTAATCAAACAGAGCATGATTTTAAATCACCTCCA  
CCAGAATCTGATAAATTATACATGGCTATTGGTGAAAGAGACGTTATTGAAGTTGCACA  
TCTTACTGCACCTTCAGATGCGATATATAAAGAATAAATGGTTGTCCACGAATTCATTT  
AGCACCTATAGCATCTGGTAGATATATTGCACGTGATGATCAATTGAGACAGAAATTTGC

AGTTCGTTTTGGAGCTCTTGCAATTTGATACAGAAATGGATGCTGTGGTCGAAAGTATTT  
TAG

>novel\_circ\_002049

GTTAATCCAGGCAGTAAAGCGGCTCAACAGGGGGTGAGAGAGGGTGATTTAATTAGCA  
GCATAAATGGAAGAACTACCAGGGATTTAACGAACAGTGAGGCGCATGCACTCTTACG  
AAACGCCGGTGAACATTTGAAACTCGGTTTGAATCAGGAAAATATTGGCTCTCCGAAG  
AGACGAATTTATAGAAGTAGTTTGCAGGAAAACACCACCCTGAAATTCTCTACTAAGA  
CGACGACGACGACGAGAACGACCACGACCATATCGAACACACGGATCCCATCCACAG  
ACTCGAAGAAGAACGAAGCAA

>novel\_circ\_002050

GCGTTTGGTCACCTGGAAGCGAGCCACCCCCGAAGGAGCCGAGCCCCGAGCGGAAA  
GAATCTGAAAAGGATGGTGGTATACCACCCATCTGGACACCTTCCAGCGCTGGAGCCA  
GCCCAATCCCCGAGAAAAAGGAATTTGACCGGTGCAATTCGAGAGCCCTACCCTGAG  
CCGTAAGAAGCTAGCGCAGCAAGAAGGTACGAAGGAACTCCACCACCTTGGGAGAC  
GGAAGTGGAAGAAGAAGGAAATAACAAGAAGTAGTTATGAGAGCACTAGTACCAGTTC  
GCGAATTGTCAATTCCCCTCAGCACCGTCTCAGGGATTAAATTCATTAAGTTCAACGC  
CTCGACTGCCACGTGCTCAGAATCCAACCTATAACACTGCTTCAAAAAGCAAGAGAAGG  
ACAATTGCCAAAGGGAGCAGCCTATCTAGAAGAGAACGAGGCAGAGAAGAAGCATCC  
ATCCAGCGACGAGAAAGGCATAATTAGTCCAGGAGAGATCATATACCGGTGAAGAAA  
GAATACGAGAGCGAGCCGGAACGGAAAACGAACCGCCGAAGAAGATGGCCGACTT  
GGGTCTCGAAAATTCGAGGGTATCGGCCAACGTCTAAGGAGGGTATTTCCCTTGTTT  
TGAGATCGGAAGTCAAGGAGAATAATCAGACAAAGTGGTATAAGAAAATGTACGACTC  
GTTGCATCGTGCAGACAGAAGCGATGACTACGTAACCATTCGTTACAAACAGAGAAGA  
GGGACGAGATACGGTTACGGAAGTGGATATTTAAGCGAACCGGAACACCGGTTGTACT  
CGGATCGATCCGCCACTTTGGACAATCGTCGACGCCTTCGTAACAAGGAAAATGATTTC  
TTCACGTGACTATGCCTAGAAATTTGAGGAATGGTACGTTGAAGTACAGTTCAGAAG  
TTTATAAAAATCAGCCTGGCCGTATCGAGGACTACGAACCTGGACGATCTTCAATCGCC  
GAAAAGGAAGCCAAGGAGTGGTGGGACGAGGTCATGGACATATTTGACGGGTGGTTG  
AACGACAATGGACATCCTCAGGGTACAGAGATGGAGGATCTTGGCGACGCGCAGCTG  
AGCCACCGCGCTCTCAGCCTCTCCTACCGACCGGAGACCGGTCGCAATCCGTTGACC  
AGCACAAAAATCGTCCCCCGCAAAGATTGAAACCGTACATGTCACACGCTCTCAAAGA  
ATCGGGATACGAGAGTGATTGACGCTGGTGTTCGTCGGAAGGAGGACATCGGTCCG  
TTGAGTGAATCGAGCAAAGATTGGCCTACAAAACGGTCCAAAGTGGTGGCGACGTG  
CCGCTTCATGGCCTTCGTAAACCAGCCCCAGAACGACCGAAGG

>novel\_circ\_002051

GGACGAGATACGGTTACGGAAGTGGATATTTAAGCGAACCGGAACACCGGTTGTACTC  
GGATCGATCCGCCACTTTGGACAATCGTCGACGCCTTCGTAACAAGGAAAATGATTTCT  
TCACGTGACTATGCCTAGAAATTTGAGGAATGGTACGTTGAAGTACAGTTCAGAAGT  
TTATAAAAATCAGCCTGGCCGTATCGAGGACTACGAACCTGGACGATCTTCAATCGCCG  
AAAAGGAAGCCAAGGAGTGGTGGGACGAGGTCATGGACATATTTGACGGGTGGTTGA  
ACGACAATGGACATCCTCAGGGTACAGAGATGGAGGATCTTGGCGACGCGCAGCTGA

GCCACCGCGCTCTCAGCCTCTCCTACCGACCGGAGACCGGTCGCAATCCGTTTCGACCA  
GCACAAAAATCGTCCCCCGCAAAGATTGAAACCGTACATGTCACACGCTCTCAAAGAA  
TCGGGATACGAGAGTGATTTCGACGCTGGTGTTCCGTCGGAAGGAGGACATCGGTCCGT  
TGAGTGAACCTCGAGCAAAGATTGGCCTACAAAACGGTCCAAAGTGGTGGCGACGTGC  
CGCTTCATGGCCTTCGTAAACCAGCCCCAGAACGACCGAAGG

>novel\_circ\_002053

CCGTTTCGACCAGCACAAAAATCGTCCCCCGCAAAGATTGAAACCGTACATGTCACACG  
CTCTCAAAGAATCGGGATACGAGAGTGATTTCGACGCTGGTGTTCCGTCGGAAGGAGGA  
CATCGGTCCGTTGAGTGAACCTCGAGCAAAGATTGGCCTACAAAACGGTCCAAAGTGGT  
GGCGACGTGCCGCTTCATGGCCTTCGTAAACCAGCCCCAGAACGACCGAAGG

>novel\_circ\_002054

AATCACCGAGGCGTTATGTGGAGGGCGAGGTGACGATTCACTATCGTTCACCAAGTGCG  
TACAGAGGCGAAAGAGCCATTGAGCGAGGAAGAGCTCGCTCGTCGAAGCGCGGAGAA  
TATGCGACGCGTTTATCAAGAGGAACGGCGTCGCAAATATCTCCAGGAGCTCCACGAC  
ATCGATTTCGAGGAGGCACACCGACAATTCATACCATCGCAGAAATCACCGATCCCTTT  
GAACCGTTACGACGATTTTCGTGGATGATCTGAGCCACAGAAGCCGATCCCAGGAGCAA  
ACGCCGGAACCTCGGCTCGTGGCAAGGGCGCTTTACAACCTTTATCGGCCAATCTTGCC  
GGGAATTGAATTTCCGTCGCGGTGACATAATATTCGTGCGTCGCCAGGTAGACAAGAA  
CTGGTACGAGGGTGAGCATAATGCTATGATCGGCCTGTTCCCATCGAATTACGTCGAGA  
TTTTGCCCTACGACGGTATGCGAACCACACCAAAGAAACCATACGAGGGACAAGCAC  
GAGCTAAATTCAACTTCGTTGCTCAAACAAATCTTGAGTTATCTTTGGCCAAAGGAGA  
ACTTGTCGTCTTGACGAGAAGAGTCGATGAAAACCTGGTATGAGGGGCGTATCGGAAAC  
AGAAAAGGGATATTCCCCATCTCTTACGTCGAAGTTATCACAGAGCCTGGCCTCAGATC  
AGAAACGCCAACACAAAACAAACCAGTTGCCGCTCCAGCTGCGCATAGCCTTTTGCC  
AAATGGATCAGCTGGAGGGGAAAATGAGTATGGGACCTCATCATTATATGCCGTCCATAC  
CAGTTAATATGAACACAACCTCAGCCACACTATAATTCAGTCCACGAATGGGAGGAAA  
CAAATTACATGTTTCCGAAGCACTACACATCGACACACACTCTGAACCAATACCATATC  
GAGCTCTCTATAATTATAGACCACAAAACGAAGATGAACTTGAATTGAAAGAAGGCCGA  
CACGGTATACGTAATGGAGAAGTGCGACGACGGTTG

>novel\_circ\_002055

CTGTGTCAGATATTATGAACTCTCTGGATCCAAAATTTCCACTGTATAGAATTGGTAATT  
TACCAGATAAAAAGACAAATTTAAATGATAATGATTTGGCTGTCCTTATGGCTAATGTTT  
CTTCGGCTCCACCACTTCTTCAAGAAAAAGGTTCTTATAATGATCAATTAGTGTATATTT  
TCACTAGTGGTACAACCTGGCCTTCCAAAAGCAGCTGTTATAACAAATTCTAGGTTTATG  
TTTATGGCAGTCGGTATATTTATGTTAGCAAAGTTTAAACTTCAGATAGGATTTATACG  
CCATTACCCTTATATCATACTGCTGGTGGTGTAATGTCTATTGGTGCAGCCCTTCTTCATG  
GAGCTACAGTTGTAATAAGAAGAAAATTTTCAGCAAGCGCTTATTTTCATTGATTGCATC  
AAATATAAGTGTACAATTGGTCAATATATTGGAGAAATGTGTAGATATATTTTAGCTGTAC  
CTCCAAAACCGGAAGACAAACAACACAATATCAGGATAATGTTTGGAAATGGTTTGAG  
GCCACAAATATGGCCCGAATTCGTAGAACGATTCAATATTCACAAATTGCTGAATTCTA  
TGAGCAACAGAAGGCAATGCTAACATTGTAAATGTGCGATAATACTGTTGGAGCTATTG

GTTTTGTATCTCGAATAATTCCATCAGTTTATCCTATTTCCATTATAAAAAGTTGATGCTGA  
TGGAGAACCTGTAAGGAATGCAAAAGGTTTATGTCAAATATGTGAACCAAATGAACCA  
GGTGTTTTTTGTGGAAAAATTATACCGAACATCCATTTAGAGCATATTTGGGATATGTG  
GATCAGAAAGCATCTGAAAAAAAAAATAGTTCGCGATGTATTTGCTAAAGGCGATTGAG  
CATTTATATCTGGTGACATTTTAATAGCAGATGAGTTCGGTAATTTATTTTTTAAAGATAG  
AACTGGGGATACATTTAGATGGAAAGGAGAAAAATGTATCTACATCTGAAATTGAAGCTA  
TTATTAGTAATCTTATTAATTATAGAGATTGTATTGTATATGGAGTTGAGATTCCAGGTCTT  
GAAGGTAAAGCTGGAATGGCAGCAATATATGATGAAAAAGCTACATTAGATGTCCATCA  
ATTATCAATTGATTTAAAAGAACATTTAGCAAGTTACGCAGTACCTAGGTTTATTAGGAT  
TTTATCAAAGATTGATCTCACAGGCACATTTAAATTAAAAAAGATCTTGAGCTG  
AAGGATATAATCCAAATATAATAGGAGATAAAGTTTACTATTTAAATGAAAAGCTGGAT  
ACCAATTGTAACTGCTGAAATTTATGAGCAGATTCAACAAGGAAATATTCGTCTTTAAT  
ATGTTTTGAAGTAAAAAAATTCATGGGAACAATTTTGCTGTAATCTTTACATGCACA  
TCAATAAAGTGAAGAAGCTTTTTATCTTCATTATATTAAATCAAAAATTACTTTATATTGA  
G

>novel\_circ\_002058

ATCCGGAACCGGTCACATCCATCCAAGCCATAGACATCAACGACACGAGGATCACGCT  
CACTTGGGATATACCCCGTGGACAGTACGACGCTTTCGAGGTTCAATACATAAACACGG  
AGGGGAATTACATTCAGAACATCACCACGGTGAACCTCGATAACTATCTCCGATTGAAA  
CCGCATAGAAATTACACTTTTACATTGGTGGTCCGTTCCGGGACCGCATCCTCTTATCTG  
AGAATATCGAATCCTCTGAGCGCGAGTTTCACCACGAGCGAGTCCTATCCTGGAAGG  
TGGAGAAGTTCCATCCCACGGATATTCAACCGAGCGACATCAGCTTCGAGTGGTCGCT  
ACCCAGCCAAGAGCAGAACGGCATCATAATTAAATACACCATCACCTACGGTTTGGAC  
GGCTCGAACCACACTCAGATGCAGGATTTCAAGCCGAACGAGTACCGCGGCGTGATCA  
AGTCTCTGATACCTGGAAAGACGTACATGTTTCAGGATCCAGGCGCAGACGAGGATAGG  
GTTCCGGGCCCCGAGGCGGTGTGGAAGCAGAAGATGCCCATCCTCGCTCCTCTAAACCG  
CCCACGCAGGTGGTGCCGACCGAGGTGTGCAGGAGCAGCACGACGATACAAATACGG  
TTCAGGAAGAATTACTTCAGCGAGCAGAACGGAGCCGTCACGTCCTACACGATCATAG  
TCGCCGAGGACGACAGCAAGAACGCGTCTGGCTTGGAGATGCCAGCTGGAGGGATG  
TTCAGGCTTACAGTATCTGGCCACCGTATCAGGTGATGGAGCCTTACTATCCTTTCAA  
AACGGGTCCGTGGAGGATTTACGATCGGCAGCGAGAATTGCGACAACAAGATCGGAT  
ACTGCAACGGCCCCGTTGAAATCTGGATCCACGTACAGAGTAAAAGTTTCGCGCGTTTAC  
CGCCCCGACAAATTCACGGACACGAGTTACAGTTTCCCGATTCAAACAG

>novel\_circ\_002059

GGCTCGAACCACACTCAGATGCAGGATTTCAAGCCGAACGAGTACCGCGGCGTGATCA  
AGTCTCTGATACCTGGAAAGACGTACATGTTTCAGGATCCAGGCGCAGACGAGGATAGG  
GTTCCGGGCCCCGAGGCGGTGTGGAAGCAGAAGATGCCCATCCTCGCTCCTCTAAACCG  
CCCACGCAGGTGGTGCCGACCGAGGTGTGCAGGAGCAGCACGACGATACAAATACGG  
TTCAGGAAGAATTACTTCAGCGAGCAGAACGGAGCCGTCACGTCCTACACGATCATAG  
TCGCCGAGGACGACAGCAAGAACGCGTCTGGCTTGGAGATGCCAGCTGGAGGGATG  
TTCAGGCTTACAGTATCTGGCCACCGTATCAGGTGATGGAGCCTTACTATCCTTTCAA  
AACGGGTCCGTGGAGGATTTACGATCGGCAGCGAGAATTGCGACAACAAGATCGGAT  
AACGGGTCCGTGGAGGATTTACGATCGGCAGCGAGAATTGCGACAACAAGATCGGAT

ACTGCAACGGCCCCGTTGAAATCTGGATCCACGTACAGAGTAAAAGTTCGCGCGTTTAC  
CGCCCCGGACAAATTCACGGACACGAGTTACAGTTTCCCGATTCAAACAG

>novel\_circ\_002060

GGCTCGAACCACACTCAGATGCAGGATTTCAAGCCGAACGAGTACCGCGGCGTGATCA  
AGTCTCTGATACCTGGAAGACGTACATGTTTCAGGATCCAGGCGCAGACGAGGATAGG  
GTTTCGGGCCCCGAGGCGGTGTGGAAGCAGAAGATGCCCATCCTCGCTCCTCTAAACCG  
CCCACGCAGGTGGTGGCGACCGAGGTGTGCAGGAGCAGCACGACGATACAAATACGG  
TTCAGGAAGAATTACTTCAGCGAGCAGAACGGAGCCGTCACGTCCTACACGATCATAG  
TCGCCGAGGACGACAGCAAGAACGCGTCTGGCTTGGAGATGCCAGCTGGAGGGATG  
TTCAGGCTTACAGTATCTGGCCACCGTATCAGGTGATGGAGCCTTACTATCCTTTCAA  
AACGGGTCCGTGGAGGATTTACGATCGGCAGCGAGAATTGCGACAACAAGATCGGAT  
ACTGCAACGGCCCCGTTGAAATCTGGATCCACGTACAGAGTAAAAGTTCGCGCGTTTAC  
CGCCCCGGACAAATTCACGGACACGAGTTACAGTTTCCCGATTCAAACAGGATTGCTG  
CTGGCAGATAAGGACAATACGGCTATCATAGTTGGAGTCACGGTCCCGATAGTACTTTT  
ACTGGCTTTACTTGGTATCGGGTTATTGGTCAGGCGGAGAAGAAGTCAGGGACGGAAG  
ACGACCGAAACGAGGACCACCGACAATTTGTCCCTACCTGACAGCGTGATCGACACG  
AGTCGGCCGATCAAGATAGAAGATTTTTCTGAACATTATCGGACGATGTCGGCCGATTC  
CGATTTCCGTTTCTCGGAGGAGTTCTGAAGAGTTGAAGCACGTAGGAAGGGATCAACCT  
TGCACAGCCGCCGATCTACCGTGCAACAGGCCGAAGAATCGTTTCACCAATATTTTACC  
CTACGATCACAGCAGATTCAAATTGCAACCCCGTGGACGACGAGGAGGGTTCCGATTAC  
ATCAACGCCAATTACGTCCCCGGGCACAATTCTCCGAGAGAGTTCATCGTCACCCAAG  
GTCCTTTGCACTCGACGCGTGACGATTTCTGGAGAATGGTCTGGGAAAGCAACAGCAG  
GGCGATCGTAATGCTGACCAGGTGTATCGAGAAGGGAAGAGAGAAGTGTGACCATTAT  
TGGCCAGTCGACACTCATCCCGTCTATTACGGTGACATTTGCGTAACTATATTGAACGA  
GACGCATTATCCCGATTGGAGCATCACCGAATTTATGCTGTGCAGAGGAGACGCGAAA  
AGGGTGATCCAACACTTCCATTTACGACGTGGCCGGACTTTGGCGTTCCAAATCCTC  
CTCAAACGTTGGCCAGATTCGTTCTGGGCGTTTAGGGAGAGAGTGAGGCCGGATCAGA  
GGCCGATCGTGGTCCACTGCAGCGCGGGAGTCGGCCGCAGCGGTACGTTTCATCACGTT  
GGACAGAATACTACAGCAGATCCTGGTGTCCAAGTACGTGGACATATTTGGGATAGTGT  
GGGCGATGAGGAAGGAGCGCGTGTGGATGGTCCAGACTGAGCAACAGTACATTTGCAT  
ACACCAGTGTCTTCTGGCGGTGTTGGAGGGCCAGGACATGACTGGCCCCGCCGCGAGA  
GATTCACGACAATCAGGGATTCTGAAG

>novel\_circ\_002061

ATAAGGACAATACGGCTATCATAGTTGGAGTCACGGTCCCGATAGTACTTTTACTGGCTT  
TACTTGGTATCGGGTTATTGGTTCAGGCGGAGAAGAAGTCAGGGACGGAAGACGACCG  
AAACGAGGACCACCGACAATTTGTCCCTACCTGACAGCGTGATCGACACGAGTCGGCC  
GATCAAGATAGAAGATTTTTCTGAACATTATCGGACGATGTCGGCCGATTCCGATTTC  
GTTTCTCGGAGGAGTTCTGAAGAGTTGAAGCACGTAGGAAGGGATCAACCTTGACAG  
CCGCCGATCTACCGTGCAACAGGCCGAAGAATCGTTTCACCAATATTTTACCCTACGAT  
CACAGCAGATTCAAATTGCAACCCCGTGGACGACGAGGAGGGTTCCGATTACATCAACG  
CCAATTACGTCCCCGGGCACAATTCTCCGAGAGAGTTCATCGTCACCCAAGGTCTTTG  
CACTCGACGCGTGACGATTTCTGGAGAATGGTCTGGGAAAGCAACAGCAGGGGCGATC

GTAATGCTGACCAGGTGTATCGAGAAGGGAAGAGAGAAGTGTGACCATTATTGGCCAG  
TCGACACTCATCCCGTCTATTACGGTGACATTTGCGTAACTATATTGAACGAGACGCATT  
ATCCCGATTGGAGCATCACCGAATTTATGCTGTGCAGAGGAGACGCGAAAAGGGTGAT  
CCAACACTTCCATTTACGACGTGGCCGGACTTTGGCGTTCCAAATCCTCCTCAAACG  
TTGGCCAGATTTCGTTTCGGGCGTTTAGGGAGAGAGTGAGGCCGGATCAGAGGCCGATCG  
TGGTCCACTGCAGCGCGGGAGTCGGCCGCAGCGGTACGTTTCATCACGTTGGACAGAAT  
ACTACAGCAGATCCTGGTGTCCAAGTACGTGGACATATTTGGGATAGTGTGGGCGATGA  
GGAAGGAGCGCGTGTGGATGGTCCAGACTGAGCAACAGTACATTTGCATACACCAGTG  
TCTTCTGGCGGTGTTGGAGGGCCAGGACATGACTGGCCCGCCGCGAGAGATTCACGA  
CAATCAGGGATTTCGAAG

>novel\_circ\_002062

ATAGAGCAACGATTATCCAGCAAATAAATAATCACGCGACGTAAATGAGCGAAAACCTCA  
TCGGAGTGGAAGATCATCGAGAACGAAATCCTGATAATCGGCCTTAACCGATCGAGAA  
AGTTAATAATTTCCATCCCGTGGTAGAAAATAAGAGGAAACGATCGATGAGAGAAAAA  
AAATAGATCGAGAAAGGGGGAATCGATTTCAACTCAGCAAGAGGGGGGAGAGGAGAGG  
AGAGGGAGGGGGGGGAGAAAAAGAAGAAAAAGAAGAAAGAGAGGAAAACGATGCCG  
GTTCTAACCATGTTCTAGGAAACGAAAAACATTTGTGTTGCATACTCGGGAACAATGT  
TCGGCCAAGTGACGTGAAAAAGATACAATACACTTTCAAATATATATACACGTCTTAGC  
ACACATCGTGGATTAACGTGAACAAAGATTTCTAAGTGGCGATAAACAGAGCACGAATT  
ATCCAATTATCCTTAATTGACGTGAATTTTAACAGTGAAACACACGGGAGGGGGAAGC  
GATTTACAGCAACATGCGTTATCTCCTCGTGTGATCTCCAACGTGATGTTTCGTTATAATATT  
AACTCGTGTAACCTCTCTGATATTGAATATACATGCGTGTTGGGAAATCTTGAAAGGAAG  
GAGGAAAAAAAAGAAGAAGAACGAAGAAACAAGGAAAGAAAGAAGAAGAAGAAG  
AAAGAAAAAAGAAAGAAGTCACGTTACACACGTGGTTGATCACAATTGTTACGAAATT  
AAAAGTGGACGGACCGTTTCGTAAAGGATCAGGTTGTTGTTGATTGACGGGCAAATTGT  
GCGAACACGATGAAATTCATAGGATCGTTGTTGGGGATCAGCTCGCCCAAGAGGATGG  
GCAAGGAGTACATGAAGGTGGGGAGGAACGCCCTGTTTCGGCGTAAGGACGAGCCAAC  
ACGACGGCCTCTACACGGACAAGGTCCCTAGACCTTTGTCCTTCCTCGTTTCTAAGAAT  
GGGAAACTGAAACACG

>novel\_circ\_002063

GTACATAGACACGCAGCGTGGCCGCACACACGATAAGGCTGATTTTCGTTGTCCTCGAG  
GGAAGAATGAAAAGGAGACGAAGAAGGAGCCGGAGAAAACGAGAACTAATGAGCGG  
CGCGGCTGATCCCGCAGTGGCGAGGTCGCGAGGGATCGTGGCGTGAGACGAGACAAG  
AGGAGAGGGAGGGAGAGGTATAGAGAAGAGAAATTTGTCGAGGGTGGAAGGAAGAA  
AGAAAAAGGCGGAAAGGAAGGAAGGAAGGAAGGAAGGAAGGCGTGACGAAAGAGG  
AGAGCGAGTAAAGCGGAACGGGGCGGAAGAGAGAGGAGATTCCTGGATCGTGAGGC  
GGGCGCGTGTGCAACAGGCGATTTCTGACCGATTCATCTTGGCAGGTTTGCAGGTGTT  
CGCGTGCGTCCTTCGTGGCCTCGTTAACGCGGGCTTCCTCTTTCTCTAGCCTGGCCCCCT  
AGTCCTTTTATCGTTTTCCTTCGACCTTGGTCCGGATCCGGGGAAAATAATAGGCAACG  
GTTCCGAATAGAGACGAAAGAGACGAATACAACGGTATACGCACGCGTATATATACATA  
TATACACACATATATATATAAAAGGAAAGAAGAGCGAGGTTGTTGCGAAGGCGAGGAAT  
AGAAGAGGAGGAGAAGAAAGGAGAGAAGAGGAAAAGAAGGAGGAAAGTCGAGGG



GAAGAAGAAGAAGAAGAAGAAGAGAGAAAACGTGGGGAGACGGAGAGAGAGAGAGAGAG  
AGAGAGAGAGGAAAATCGAGCGAAAGAGGGAAAGGAGGAAGGAAGGTGGGACAGG  
TAGAGAGAGAGAGGAGAGGGGGGGAGCAGCGCGAAAGAGGAGAGGGAGAAGAAGA  
GGCGCGTGGTGGTTCGTGGTGGGTGCTCGGTAGTGGACGGACGAGAGCGAGCGAGCAT  
CCAGATCTGTTCGCGTGTCTGCGTCTGCTGGGATGGGACGGAATCGGGACGACACGACC  
ACGACCACGACGATCGCAACCACGACGATCGCAACAGCGACGACAATAACGACGACG  
AGGAGGTCGACGACGACGACGACGACGACGACGACGACGACGACGACGACGACGACGACG  
ACGAGACGAAACGGGACGAAACGGGACGACGACGACGACGACGACGACGACGACGACGACG  
CTCCGGGATGGGATGGATGTTGCGGCCCGTGTGAGTAGCAGCGAGTCGAGTCGATCC  
CTGGTGC GCGCTGGTATTGGTTTCACTCTCGGCTGCTGCCGGCCCGTGTGCTGGTGTGT  
CGATCTCTCTACGAGAGCGAACCAGGAGCGTGGCCGAACCAGCCGGAGAAGAGA  
ACCGCGGCACTCGTTCAGTAGTTTCTCGGACGCCGCACCGGCACCATCCGACCTACCA  
GATAACCCCGTCGACTTACCGCCGACTACCCCGACCGATCGACCGACCACGCAACAT  
CGCACACCTTCCCACCACCACCTTCGATAATATATAATACATATATATATGTGTATGTATAT  
ATTTTATATATACGTGTATATATATATATATAGAGAGAGAGAATAATTTTCGATCCGATTTTC  
GGCCTCTCGACGCGTCTCGAAGTGAGGAGGAGGAGGAGAAATATCGTCGGTTGTGGAAG  
ATCGTATCGGCCACGAGGGGGATTGGAAAAAGTAATCGCGATACGGCGACGGTCGCGT  
GACGACGACGACAACGACGACGACGACTCTCCACCTTGGCCTTTTTTTTTTTTTTTTCCC  
CTCTCCTGCCGATATTTAACGCGTGCCTATGTACACATAAATACGTACACGCGCGTATAC  
GCATGTACATACGTATACACATATACGTAATAGCGGTGTGGTGTGATTTTTTTCCTTCCCC  
CCTTCGAAGCTCCAGAAGAGTGTGACACGCGCGCACCTCGTTTTCTTTTTTTCCTTTC  
CTTTTCTTTTCTCTCTCTGTCTCGTCGTGTCTGCGCTCGTTCGATTGTTTATCAGCAG  
GCCCCGCCCCCGGTGTGGTGTGCAGCGCGCGGCGGAGGGAAGGATCTCGCGGTGAAT  
AGCGGATCTTTGCCAGGTGTTTTCTCTTCGCGCGTTTATATACGCAGTGAAACGGACCG  
TGTGTGTAGTACGCGTGCCTTGTGCGTACAAGTAAGTGTGCCTTCGCGAACGTAATTTA  
CCGCGCCGATTCCCCGGTTCGCGCGAGGGGGAACCAAGTGGTGGAACAAGAAGAAG  
AAGAAGAAGAAGAAGAAGAAGAAGAAGTAATAAAGGAGAAGAAGGAAGAGAGAA  
GAGGAGACGGAAGAGGAGAAAGGAAGAAAGAGGAGGAGTAGTTAGCCGATAGTAGT  
TACACAGTTCGGCGCAGTGTTTCGTTCCCTCGAAGATTAGTGGGTGATATCTGCCTCCTTT  
CTTCTTTCTTTCTTTCTTTTTTTTTTCTTTCTTTTCCCGCCCCCTCCCCTCCCAACTC  
GAGGATATTTTCGCGGATCGCGACCCTTCGCCTCGACTCCGGAAGGATACTCCGCGGT  
CTCCCACGGACGGCAGGAGAGAGAGAGAGGGAGAAAGAGGCAAGTGAAAGAGAAATCG  
TGATATAGACGAAGACAAGGAGAAAAAGAGGGAAAGAGGAGGTGGTGGTGGCGGCGG  
TGGTGGTGGAAGAGAGGGAGAAAGAGAGAGATAGAGAGAGAGAAACCCGTTAAGGC  
GGTACGAGTAACGTGTCGGTGGAAGTTCTTGCGATTGATAGAGGGACTGAGAAAGAA  
AGGAAGGAAGAGAGGGAGAGAGAGAGAGAGAAAGGGACGGAGCGAGGTCGACGAA  
GGTAATCGCGGTGGCATCGAGCTGCGTGCCTTCGACAAAACCGATTAAAGACGATCGA  
GGCGAAGGATCGATCTCCATCTATCGCCCTTTCGCCGACTCTCGCGGCCGAAACGACG  
ACGACTACGACGACGCGTTCCCGGCGACGTTTCCACGGCTCCGCCACCTCGATGCTGC  
CCCCTCGTAAACCGATCCCGTGGTTCCCATCTTCGCTAACAACCGTTCTGACTGCCG  
CCCCCGCGCAACAACCGCCTTCCGAACCGCGCGTCCGCACGACGAAAACGAGGAGG  
ACGACGCGTTGCGAAGAAAGAATCAGGCCCGTTGATAGCCCCGCAATAATGCGAGAC  
TCGAGCGGGAAACGCGGTGCATGGACGATAAAGGCGGGCCGGCCGGTGCATCCTCCT  
CGCTGCTGCGCATCCGTCCACGGTATCTCGTTCAAGGCGAAAGTGGAATCGAGGATG

```
>novel circ 002064
```

CGCGAGTACACGGACGATTGCGTGTTCAACGAGACCCTGGAGCAGCACAACTACAAC  
ACGTACAGCTCGGCGAAATGGTCGACGGCCAAGAAAACGTTGTACCTCGGATTGAAC  
CGTCACGGCCAGCCGAGGAGGGTACAGGCCAAGGGTCAATCTCGGCAGGCTGTCC  
GCCTACGCGCGGGTGTTGACTCAGGTCGCGCCCCTGGACCGGGTGGAGACCCTCCAA  
AGGCGGATGCTCGGCGCCCAGCACAAACGTCCGCCACCGTCACAACACCCACCGCGGC

GACCTCATCCAGCAGTCCCTCTGCCCCGCCCTCCCGGCCAGGAGAAGGACGGCCGG  
GACAAGTTCAGGTGTCGCAAGCGGAAAAAGAGGAAGAAGAGGAAGCGGAGGTGCAG  
GCCGGGCGAGAAGCCGGGCCCCCAGTGCCAGATAGCCGAGTCGAGCAAGCCGGTCCC  
CCCGGCTAGGAACCAGAGCCTAGCCGCGAACGGGACGTCCCCGATCCAGTCGAAGAG  
ATCGTGCGAGGGTTTGGCGAGCGAGGAGGCCTGTCGAAGGGAGGCCCTCTCGGTCCC  
CTCCAAGAAACGGAAGCTGCGGGTCGAGGAGATTGCGCCCGACGGAGAAGAGGAGA  
CAGAAGGAAGAGAAGGTGAAAGAGGAGAAGGAGGAGGAGGAGAGAGAGGAGGAA  
AAGGAAAAGGAGGAGGAGGGAGGAACGTCAGCGGGAGCAGCAACG

>novel\_circ\_002065

CGAGTCTTATCGTAATGCACTACAAGCTTTTCATAGATCGAAGACGATCTTCCAACGACG  
TGGAGATTGAGACATCGAACAGTCCTGATAAATTAAGAGCCGATCTTTCATCGAAAAAT  
AATAACAATAAATGCGATAATAAATGGAAATCACAAGAATTGAAATCAATTATACCAGG  
TGTACCACATATAGCAGCTCCTGAAATTTTTGAAATTGGATGGATAGCCGGCACAGAAG  
ATCGATATCTAGAATTAATTTTTGCCGAATGGCAAATACTCGAGTTTCACTGAAGAGG  
CATTCACATCCGGAATGCAAAGATGCTGTGAAAGCAGATTTAGATATACTTTCAGAAAT  
TCGACACCCTAACGTGCTATTGTTAATGGCCACCACCTTTACTGACGATCATGGTTTAGT  
CTCTATTTTTGAATCTGTCGATTGTACCCTTTATCATTATATGCACGATCAGGGTGAACGA  
ATATCCATGCAAGGTATTGCAAAATGCGGGGGAAGACTATCCGATGCTTTAAGACATTC  
TCATATGCGCGGCTATGTGCATACTGCCATCAGTTCGCATTGCGTCTATCTGGCTTCTAAT  
GGTATCATAAACTAGGTGGATGGGAACTGGCCATGCATATCAACAATCCAAAACCAA  
AGAGAGAATACGAGGAACGTTTACGTGCCGAAGTTTTCCGCTGGCAAGCGCCAGAAC  
TTTTTCATGGTTACGAACCATATAAGGAGAGCGATGTCTATGGATTGGCTTTATTAATTT  
GGGAAATGTGTACAA

>novel\_circ\_002067

GTGCAAACGTGAGATCACCCGGGAAAACCTCCCGGCGGGGATGATTGGAAGCAGAG  
AGGGAACAGGAATTGGTAGAACGATGAAAGAATACGAAGATCAATTGGAGGCTCTTAA  
AAAGGAGAACTTCAACCTTAAATTACGGATCTATTTTCTCGAGGAGCGAATGGGGATTA  
CGTCGGCCGATGAGAACGCGATAAAGAAAAATATTGAACTGAAGGTCGAAATTGAATC  
GTTGAGGAAAGAGTTGGTCGAGAAACAGGAACTTCTCAGCCAGGCAGCGAAAGCGTT  
TGAGTTAATCGAGGAACAGAAGGAAGTTTCATCGCGGAATCAAGCTCAGTATCAACAA  
TCGCTTGAAAATGAACGGGAAAAAATCAGAAACTCGAGAAGGAATTGGCCGAATAT  
CAGGAAAAAATGGTTGATGCGTCCATCTATTACAAGGAAGCTTTCGGAATTACGCCGG  
AAAAGGCGTTTGAAAACGAGGAGAAATTGCATCAGATGGAGGAGCTCGTTGCATCTCT  
AGAAGCTGAGGTGAAACAGGTGACGAGCAGTTTGGACGAGGAACGCGTGTGGGCGC  
AAGAACTGGAGAGCGAACGGGATGAATTCAGGGAACGTTTGGAGGCTGAGACCCGTT  
TGAAGGAGAATTTGGACGCGGAGAGGCAGGAGGACATCGGGGCGCTTCGGTTGAGAG  
TAAAAGAACTGGAGGAACATCTGTTGAAAAGGGACACTGTCGTGCAGCAGTGCAAAA  
ACGAGCTGCTCGAGAAAGAAAGAGTGATTAAGGAAAAAATTTACAGCTGGAGGAGA  
GGTGTGCGCTGTACGAAGAGTTGAACGCCGTTTTCGGAGAAAAGGAAGAAGCAAGTCG  
ATCAGTTGAGGGTTTCTATAAAAACCAGGGACGATGCCCTCACCGACTTGAACAACAA  
ACATCGCGCCCTCCTCTCTCAATTTCGAGAATGGATATGCGAAAAGATCATCACCCCCTA  
ATAGTCCGTCGACCGTGAATCCAAACGAAGATCCCTTGCAAATGAGAATGGGACAAAA

GGTAACTGTGCAAGGAATGACGAAGAGAGTGAACACTTGTCTCGATTGGGAACCAAA  
TCGAGAAAGGTCAACTAGAAATGAAGTCGCCGGTGCATGGTTTAAGTGGAGAGATCAA  
AGACGTGAGAGATTTAATCAAGGAAATAGAAGATAAAGAAAGCGAATTGAAACGTCA  
AGAGGAGACGAGGAAGCAGTTGGTGTGAAATTGTGCAACATGCAGAAGCACGTAGA  
GACGACCGATTACAAGTTGAAAAAATTGGAGGGCGAACACGAGAAAGCGATCAAGAC  
TATTCAAGGTTTTATGGAGAGGCAGCAGCAATTGGAGAACACGAAGCTGAGGAAGGA  
GCAGAAAATCATGGAGTTGGAGATCGAGTTGAACAGGCTGAGGGAGTGCAGAGAGCTT  
GAAAGCCTCGAGGGATGGCCACAATCAATTCGTTCTGAAGAGACTTCAGCACCGACATG  
ACGGATGATCCAGAGCGTGATCCCAGCACACAG

>novel\_circ\_002068

CACTGGCAGATCCCGTTGGGGAGAAGATTCAGATCGTTAAAGCTTTGGTTCGTCTTGA  
GGATGTACGGCGTGGAGAATCTTCAACGATACATCAGAAAACACGTGGAGCAGGCTCG  
TGAATTCGAGGCGATGATCCTATCCGATCCACGATTTCGAGATCGTGGCCGAGGTCGTT  
TAGGGCTCGTCTGTTTCCGGTTAAAG

>novel\_circ\_002070

ATAGTCGGATGCGGGCTCGCACGGTAGGCCAGGTTCTCCCGGTATACCCGGAACACCG  
ACCGGTCCTTGAAGGCCCGGCAAACCAGGCGCGCCGACAGGTCCCGGCAAACCTGGC  
AAACCGACGGGGCCCTGGCGGCCCTTGAAGCCCTATCGCACCTTTCACTCCGTTTCGATC  
CCGGGAACCCTGGCGGGCCTGGAATTCCTTTCTCTCCCGGTGGTCCTGGCGGGCCGAC  
CGGTCCTGCGCGAAAACCGAACGGATGCAAAATCTCGATCCGAGATGATCCGTCGTTT  
CTTATTATTTTTTATTAACATAACGTACCGGGGAAACCGCGATCTCCTTTCGGTCCCAT  
CGGTGGCTCGATGCAGTCGTCACCCTTGTGCGCTTTCTGACCGACGTATCCAACCACGC  
CCATCAATCCCACCGGACCTGGATACCCTCTGTACCTTTCTCTCCGACCGGACCCGGC  
AACCCGCTCACGCCATCCCAACCTCTATCGCCCTTTTCGCCGGGAATTCCATCTATTCCG  
CTCGGCCCTGTATCATTAGGTATTGCTCGAGTATTATTAAAGTTTCCAGCAATTTCGTGTAT  
CTATTTTATAATCTATTACGCGCGATTCTTAATCAATATACGAATTTTCTTTTCATTAC  
AGGGAATCCAGGTTCTCCCTTCTGCCCAATGGGACCGGGTGGTCCACGTAAACCAGCC  
TCTCCTTTCTCGCCTCTCTCGCCCGGCAAACCGGGGAATCCTTTGACGCCTGGTTGGCC  
ATCGCGACCCGTAAACCGGGAGGACCCATGAGACCCATATCACCTTTTCGCCCGGC  
AACCCGACTGGACCTGGCGGCCCTCGTTCTCCCTTGTGTCCCGGTAAACCTGGCAATC  
CTTGCTCCCCTTTCTCTCCCGGTCTGTCGCGGTATTCCCTTCCCTTCCATGCTTTCCAGGCA  
TACCCGGCAAACCTTTCTCGCCCTTGATCGTCAATCCAGGGACTCCCGTAGGCCCGCGT  
GGACCTTCGTCTCCTGAAACGATATTTGTGCGGATCAAGTAACGAAAAGAACGAAAGA  
CGAAAGCGTTGATCGTTGGAAACGAGTATTTGAGTATCGTCACCTTTAGCACCGGGGA  
GACCGGATGGACCTGGATTTCGAACGGGACCAGGCGCGCCGCTATCCCCTTTCTCGCC  
GTCGTAGCCACTCAGACCTTCCAACCCGCGATCTCCCTTTTCTCCAGGCGCACCTCGTA  
AACCGGGAATACCCGGTTCGCCTTTTTTACCTTTGATCGAAATGGTCGGGCCGGGCGG  
TCCACGATCGCCTTTCTCGCCGATCGCCCCGGGAATACCAGGAAGTCCAACGGCGCCT  
TAACGTCACATATATATGTCATTATATACGCTCGAATAGAAGTTAATCTTCTTTTTTCA  
CTCGTTTACCTGGAATACCGCGATCCCCTTTGGCGCCGGGGATTCCAGGATGTCCCGGT  
GCCCCATTTACCTTCCAACCGGGCAACCCAGGAACCTCCGGGTGGACCGACGTCG  
CCTTGTTACCTGGCAATCCGTTGATTCCGGGCAGTCCAGGCTCGCCGGGAGCCCCGA

TCGGTCCCTGAAAATCGAAACAGAAACATCGATCGATTTCTCGGAACTTGGCTCGAAA  
ACGAGAGAAATAGTGATCCAGCGAAAGGGACGTACAATGTCTCCTTTAAAACCGGGG  
AAACCTCTCACGCCAGCGTCACCTTTAGTCCTTGAATCCTGGCAAACCGTCACGAC  
CTGGCGGCCCCGGGCTCTCCCTTGGGACCAGGCAGACCATCCCGGCCGATGCCTGGCAA  
CCCAGGCTCTCCTTTCGCCCCGTCCACGCCATTTCTGCCAGGGATGCCGGGAGGACCG  
CGGATCCCAGGCATTCCCGGCTCACCTTCTGCCCTTTCTCCGATACCTGACCCGGTTC  
ACCTTTACGTCCCTGGATTAACCATCATCACAGATGTGAAAAATCCGTAACTTTTATTAA  
AACGTGAAACTTCCACTAAATTTTACTAAATCGTGAAACTTAGCAGCTTACCGGTAAT  
CCCGGCGGACCTCGATCACCTTTGAATCCTTCGTATCCTATAACACCTGGGAGGCCCGG  
AGCGCCGGGAGGACCCAAGTCCCCTTTCATCCCGGGTGGTCCAGGACGACCGGGTTT  
CCCTTCGATCCCGGGCAATCCGGGGAACCCGGCCGACCCTTTCTCGCCACGTTCTCCTT  
TCATACCAGGCGCACCTTCCAGGCCGGGTCTACCAGTCGCGCCCGGCAACCCACGCCT  
TCCCGGATAACCTTTCGATCCGTCGATGCCCGGCTCGCCTCGATCACCTTCACGCCTG  
GAAATCCCGGAAGACCCGCCCTTCCACCTGCCCCCGGCAATCCCGGTTACCTACGCA  
GAAATATTACGTTTACATCTCGTAAATTAAAACCTTTTCTTTAAGTTTACCTTTGTTTCCG  
TCTTTGCCGGGTAATCCCGCGATACCGGGAGGACCAGGAGGCCCGATGGGACCGGTAT  
CTCCTTTCTCCCCTGGCGTGCCGGGCAACCCGCTTATCCCGGCTCACCCGTGTCTCCC  
TTCTCCCCACGAATCCCGGCAAACCTTGCAAACCGATAGGACCGTCTTTTCCCGGCG  
GCCCCGGAAGACCTTTCTCGCCCTTGTCGCCCCGGTGGACCAGGCAAGCCAGGGCTAC  
CCTTCACCGATATCCCAGGCTCGCCCTTTTCTCCTTTCTGCGCTGGAGCGCCCGGGAAT  
CCTCTGGGTCTTTCGCGACCAGGTTCCCCGGGGAAACCCATCGGACCCGTGTTACCCT  
TGTCGCCGCGCGGACCCGGCAACCTCTCGGCCCTACCGGCCAGGCGGACCGATTG  
TCCAGCGGGACCAGGCGGACCCTATATCATAATGTGATGTTTTTACATTCTTTGTGTCT  
TGGAAGGAAGATTAGGTAAGTAAACAATAATAATGGAATCGATTTCGTACCGCGAATCCT  
TGTAACCTTTGTACCCGCTCAACCCGTCCCTGCCCGGTGGGCCTGGCTCTCCCTTCTC  
GCCAGGCGCGCCTCTGTCTCCCTTGCTGTTGATCAAATCGAGCGGTGGACACTGGCCT  
ATTTATTTAAAGATAATTTAGAAGTAATGCAAGAAGATATTTGGAGATGTAGAATATATAT  
AATATTGGATAAGAGAGGATGAGGGGTATTTACCGGGTTCTCCTTTTTGTCCGTACGAA  
CCAGGTTACCCCTCAAACCTATTTGACCCGAACGGCCCGGTTCTCCAGGCTCCCCCTT  
CACGCTCAGACCACGCTCTCCTTTTCGACCTGGAATACCTGGCCTTCCAGGAACCCCG  
TCTTGGCCCGGAAATCCTCTGTACCCCTGTTGCGACAACAAGTGCGTACAAACATGAA  
GAACGTTGGAGGAACGAGCGAAAATAGGAGAAGAGACTAGCGTTTATTACTTACAGC  
GGTACCCTTTGGACCCGGGAAACCAGCAAATCCTATAGCGCCCTTCTCCCCGACTGGA  
CCTTGGGGACCCGGTGGACCTGGCCTTCCACCTCTCCCCTTACACCTTTGTGCGCCCT  
CTCCGTTTTAATCATGTTGGAC

>novel\_circ\_002071

GATCCCCGGTTTGCCGGGCGAGAGAGGCGAGAAAGGAGAGGCTGGTTTACGTGGAC  
CACCCGGTCCCATTGGGCAGAAGGGAGAACCCTGGATTCCCTGGGCCGAGCGGAATAG  
ATGGAATTCCCGGCGAAAAGGGCGATAGAGGTTGGGATGGCGTGAGCGGGTTGCCGG  
GTCCGGTCGGAGAGAAAGGTGACAGAGGGTATCCAGGTCCGGTGGGATTGATGGGCG  
TGTTGGATACGTCGGTCAGAAAGGCGACAAGG

>novel\_circ\_002073

GGTTTCCGTGGCTCTCCTGGATTGCCGGGTATGCAAGGTGACGTGGGCGACACGGTGT  
ACGGTATAAAGGGCGCGGAGGGTGAGCAAGGAGACAGGGGCGAACCTGGGCCTCCG  
AGTAACGGTGAGTTCAAGGAAAAACGAAGGTGACGCCGGTGAAGGGCGCCACCGG  
CCCCAAGGGAATGCGGGGAGACGCGGGGGAGCGAGGAAGAAAGGGAGAAATGGGCG  
CCAAAGGACCTATCGGTCGGGCAGGATTCTTCGGTATCAAAGGTACGAAGGGGGAGCA  
AGGTGACGACGGACCAAGGGGTAAGCAAGGTGCGGAGGGTCCGCCAGGACCCGCGG  
GAGAGAAGGGAGAGAAGGGAGCGCCGGGATACGCTGGAAAACCGGGACCGGACGGA  
TTTGACGGAGAACTGGGAGATGGGGGAAATCAAGGACCACCGGGTAAACAAGGAGCT  
CCTGGAGAACCAGGAAAATACATACCGGAATTGGACGAAATAATTCAAGGAAATATCG  
GGATTCAAGGAGATTTAGGCCCACCCGGTAATCCAGGAGAACCAGGAACACCAGGTTT  
ACCCGGCAAAGTAGGTTATATAGGGCCGCTGGTCCTCCAGGACCCCCCGGCTCCTCT  
GGGTTACCAGGATTGAAAGGATCTTCCGTAAAAGGAGAGCCAGGAGACGATGGTTTTA  
CCGAGAAATGGGTCTGCAAGGTCCCCCGGGTGCGCCGGGTATACCTGGAACCGTTGG  
GCTTAAAGGATACCCTGGATTAATACTATAGTTGGACCACCAGGTCCCGATGGAAAACCTG  
GGTATCCAGGTGTGCCTGGATTGCCTGGAGATCGGGGTGATCCCGGTGTCCAAGGTCC  
AAAAGGTTTTCTGGCAAGGGGTGAGGAATCCGGGTCTCCGGGTGAGCGTGGTTT  
GCCAGGTATACCAGGACTTCCTGGACCCGATGGGTGGCCAGGTTTACCAGGTCTGAAA  
GGCGTGAAAGGCTTTAAAGGAGACGATTGCAATTGTCCGCCAG

>novel\_circ\_002074

GAAACGCTAGCAGTACTTCGGAATTTGTAAGGCAAGAATTGAGAAGAGCGATCGTTGG  
GGCGCGAACGCAACAACAGCAGCAACAAAGGATACCCAACAACATTCAGAACAACCTT  
ATCCGGACAAGTGTCGCAAGATGATCTCGAAGCACTCGGTTTAAACGTTTGAAATGTCTT  
CTGCAGGTGAGGCTGTGGTTAGCGATGGCCCTGCAAAGAGCTGGGCCATTGGGAGTAC  
CGGAAGTGCCCCCTCGTCCTCCAGG

>novel\_circ\_002076

ATTCGGCACATTAGGGAACAGGAAGGCTCGAATAGTCATGCCGTGCAACAGGGGGAA  
GTATCTTCTTCGAATCCTAACATATTGTCCAACGATCAAGTTGGTCCTATTTTACTTGAG  
GCGCTAGATGGTTTTTTGTTTCGTTGTAAATACGGAAGGACGAGTGGAATATGTAACAGA  
TAACATAACGCAGTATATAAATTATACGAAGGATGATGTTCTTGGCAAGGATATTTATAAT  
ATTATTCATCATGGAGATCATAACACCTTTATGCCGAGTTTGTTGCCTATGCAATTAGGCT  
GGACGAACGAGCAACAGCCCCAAAGAAACCGCACGTTCAATTGTCGCTTCTTGGTGA  
AGCCTCCTGATGATAAAGAAGAGACTATGGAAGAGAAGCAGCAACGAGTATCGAAATA  
CGAATCTATGCAAATCTGTTTCAGCTCTTTTGCCAAATAATAGCGATCGTCTGGAGAGCG  
GTGACGTATCTTCCGAATCTTCGGACAACGGTCCTTGCGTAATGTGCGTGGCTCGTAGG  
ATACCCCGAACGAAAAGCCCATTGGTACGCCCATCGAGCAATTTACCGTCAAGTTGG  
ACACCACGGGGAAGATTATCGCGGTTGATGTTATCTGGTTGTCGTCTCCTTACTCTGAG  
TACCTAAGCAAGGTAAGCAAGGAGCTGATTGGCACTGCGATAAAGGATTTGTGCCACC  
CTCATGATCTCAATAAATTAACAGCACATTTGAACGATACGCTTCAAGTCGGTGAGAGT  
ACCAGTGGTGTATACCGATTACGCGTTAGTCCTGATAAGTTCCTTAACATTCAAACAAA  
GTCAAAACTTTTTCAAAGCAAATGTGATGAATACACTTGTTACCGACTTCATTATGGCTA  
CCAATACTATTATTGG

>novel\_circ\_002077

TAACAAGTGCCTTAACGAAAAAAGACGACGGAACCAGGAGAACCTGTTTATCGATGA  
GCTTGCCGAGCTGATTTCCGCCACGGACATGAGCTCTGGCAAGACTGACAAATGCCAG  
ATCCTTCAGAGAACCGTCGACCAGGTCACGTGACCTTGAATGACGTCACAGAGGCCAA  
TAGGAAACCTTCCAAACGGCGTTATAACCCGAACTACCGGAGCAAGAGTTTCGTGTGAC  
GTCATCTGCGCAGTCGAGCCATGCGCATCCGTCTGTGTCCAACGACGTGACCGAGATT  
CGGCACATTAGGGAACAGGAAGGCTCGAATAGTCATGCCGTGCAACAGGGGGAAGTA  
TCTTCTTCGAATCCTAACATATTGTCCAACGATCAAGTTGGTCCTATTTTACTTGAGGCG  
CTAGATGGTTTTTTGTTTCGTTGTAAATACGGAAGGACGAGTGGAATATGTAACAGATAA  
CATAACGCAGTATATAAATTATACGAAGGATGATGTTCTTGGAAGGATATTTATAATATT  
ATTCATCATGGAGATCATAACACCTTTATGCCGAGTTTGTTGCCTATGCAATTAGGCTGG  
ACGAACGAGCAACAGCCCCAAAGAAACCGCACGTTCAATTGTCGCTTCTTGGTGAAG  
CCTCCTGATGATAAAGAAGAGACTATGGAAGAGAAGCAGCAACGAGTATCGAAATACG  
AATCTATGCAAATCTGTTTCAGCTCTTTTGCCAAATAATAGCGATCGTCTGGAGAGCGGT  
GACGTATCTTCCGAATCTTCGGACAACGGTCCTTGCGTAATGTGCGTGGCTCGTAGGAT  
ACCCCGAACGAAAAGGCCATTGGTACGCCCATCGAGCAATTTACCGTCAAGTTGGAC  
ACCACGGGGAAGATTATCGCGGTTGATGTTATCTGGTTGTCGTCCTTACTCTGAGTA  
CCTAAGCAAGGTAAGCAAGGAGCTGATTGGCACTGCGATAAAGGATTTGTGCCACCCT  
CATGATCTCAATAAATTAACAGCACATTTGAACGATACGCTTCAAGTCGGTGAGAGTAC  
CAGTGGTGTATACCGATTACGCGTTAGTCCTGATAAGTTCCTTAACATTCAAACAAAGT  
CAAAACTTTTTCAAAGCAAATGTGATGAATACTTGTACCCTTCAATTATGGCTACC  
AATACTATTATTGG

>novel\_circ\_002078

GATCGGCAAGATTACGAAGAAGTGTAACTTCTAGAAGGATGAAAAAATTGTGG  
AAAACCTCAAAATTCCAGCAAGACGATTCCCAAAAAATATAATAACCATCAGATAATTGG  
CAATTGAGATGTCCTCTGCTTAGTATCTTGGTGAGAATTGCCTGTCATTGAATATTTATA  
AGCGATTCCAGATTTGGAGGATAAACAGAAAACCTGAGATCGTTCCTGAATAGTAGCA  
ACGACAAGTTAAAAAATAAAATATCTAGGATTTCTATTTTTCGCCAGTAGATTACGCAT  
ACGGTTAACAAATCTGTCTATATGTACGTGAATAAGTGAGAAAGTGCGGTGTCGAAAA  
GTGAATCTGATGTTTCGAGGGCGAAAAGGAAACGACGACAGTGACGGTGCTCGGTGCA  
TAAATAGAGTTATATAAAGTGCAGAAAGAAGATCAAAGAAGAAAAATGTGTACTTAAT  
CTTGATTTTTTTTCGCGAGTGATTTTACGTTGGTGACGTGAACAGTGTCTATTGTAAAGA  
ACATCCCGAATGTCGGTAAATAAAGAAGCATACGATTGAACGATGCAATTAAGAACGC  
GTGTTTCGATCAGTGAGTGTCGGTCGAGAAAAAAAACCTATTCGTTTTGATTTGATTTT  
TTTCTTATTTTCGCATAGATTCAAACGGGTGACGAAACAAGAAATAATTTAGAGTGAAAT  
GAATTATTATTTTTTCCATTTCGTCATTTTGTAACCTCCCGTTATGTACTTGATTTTGATCAT  
AGTTTGGAATTTGACGTAAAAAGAAAAGAAAAAAGAAAGCAAGTTTTTCG  
GTTGAACGGAAGAAAGGAAAGATTTGAAAATTTGTCGCATTGGAAGAGTTAAGTT  
GGTGATAATAGTGGGTGACGTTTATTGATTCGCAGTGGTGATATCTTTATTATTGATATC  
CATATTATTGGTTGTAAAGGTATGGTGAAGAAAACAGGTTAGTGGTGATAGTGGCATAT  
CGCGTAGAAAGAGAACACTCGACTGTGACTCTTAACCTATTACCACGGATTTCTCCCG  
GCAGTTTGACACAACAGCCATCCTCGATGAGAGGAGGCACATGTCCATTGCTGCCGCT  
GAAAATGCAGGGCTCGTTTCGAGAACGATGCACGGGCCTTGACTGGAAGTTCGCTAC

GAGTCTCTACGCGGCGGCGGCGGCGGCGGCGGTCGATAATCGTAAGGAGGAAAGGAGCG  
AAGGGCAGCGATCGCGTATGCGGTTGGATTTGAACAGAGGAAACACGCGACGGTGGC  
GTATGCGGCGGTGGTGAGCGATGATCGCGAAGAGAGGGAAGTTGGATGCGAGCGCGC  
GCAGTGAGTGGCGCTGCGTTCTGGAGAAGATAGGAAAGGAGAGATGGAAGAACGGA  
CGGGCAGCGCGTATTGGCAACGAGGAGAAGAGTGGAGAGGAGCATTGGGTCCGTGAC  
AACTGGGTGACGGCTGCGTGGATACACGACGGTGGCAGTGATGCAAGTGTCTTCTAC  
GCGATAAGTGGTGACGTCGGCAGAAACGAGCACCGGCTTCTTGCCGCGCTGCGGGTG  
TGCTCCTTTGCCTCTCTCGTCTTCCTCCTCCCTTCTCTCCTCTCTTTTCACTTCCGTTTTA  
CCTTGGTCCGTCTCGTCCGTTCGATCGACCCGCTCTCTTCCTTCCACTAGTTTCGCGTC  
GTCTATCTCGCGCGCGAGTGCTTGTGATAAATCGTTTTCGCGGATACGATGATGTGCGTTT  
AACGAGGAATATCGAGGAATGGAAAGTTGGTTTCTAGGTGTCGTCCACACGTCTTGTT  
GGAGTCTGTCGTGGGACCTCCGTGAGGATGCTTCTCGGAGAAAACCTTCCATTGAATTA  
TATTTTATTTTATCTTATCGTGCCTATCCATTCCGATATCTTTTCACCGTGATCGTAAGAT  
ACATAAATTATTAACGTTTTATTTCGAAGAAATGGCGTTATTACGACAACACGCTATCGG  
CACCAGGCCTAGCCCGCGTGAATTACAGGACCCGCTTTGGGTCAAATGAGTGCGATT  
ACTGGCAGCATCAGCAAAAAAAGAAAGAAATCAGATGCCAAGCCTCAGTCGCAAATT  
AACAAGTGCCTTAACGAAAAAAGACGACGGAACCAGGAGAACCTGTTTATCGATGAG  
CTTGCCGAGCTGATTTCCGCCACGGACATGAGCTCTGGCAAGACTGACAAATGCCAGA  
TCCTTCAGAGAACCGTCGACCAGGTCACGTGACCTTGAATGACGTCACAGAGGCCAAT  
AGGAAACCTTCCAAACGGCGTTATAACCCGAACCTACCGGAGCAAGAGTTCGTGTGAC  
GTCATCTGCGCAGTCGAGCCATGCGCATCCGTCTGTGTCCAACGACGTGACCGAGATT  
CGGCACATTAGGGAACAGGAAGGCTCGAATAGTCATGCCGTGCAACAGGGGGGAAGTA  
TCTTCTTCGAATCCTAACATATTGTCCAACGATCAAGTTGGTCCTATTTTACTTGAGGCG  
CTAGATGGTTTTTTGTTTCGTTGTAAATACGGAAGGACGAGTGGAATATGTAACAGATAA  
CATAACGCAGTATATAAATTATACGAAGGATGATGTTCTTGGCAAGGATATTTATAATATT  
ATTCATCATGGAGATCATAACACCTTTATGCCGAGTTTGTTCCTATGCAATTAGGCTGG  
ACGAACGAGCAACAGCCCCAAAGAAACCGCACGTTCAATTGTCGCTTCTTGGTGAAG  
CCTCCTGATGATAAAGAAGAGACTATGGAAGAGAAGCAGCAACGAGTATCGAAATACG  
AATCTATGCAAATCTGTTTCAGCTCTTTTGCCAAATAATAGCGATCGTCTGGAGAGCGGT  
GACGTATCTTCCGAATCTTCCGACAACGGTCCTTGGCGTAATGTGCGTGGCTCGTAGGAT  
ACCCCCGAACGAAAAGCCCATTGGTACGCCCATCGAGCAATTTACCGTCAAGTTGGAC  
ACCACGGGGAAGATTATCGCGGTTGATGTTATCTGGTTGTCGTCCTTACTCTGAGTA  
CCTAAGCAAGGTAAGCAAGGAGCTGATTGGCACTGCGATAAAGGATTTGTGCCACCCT  
CATGATCTCAATAAATTAACAGCACATTTGAACGATACGCTTCAAGTCGGTGAGAGTAC  
CAGTGGTGTATACCGATTACGCGTTAGTCCTGATAAGTTCCTTAACATTCAAACAAAGT  
CAAAACTTTTCAAAGCAAATGTGATGAATACACTTGTTACCGACTTCATTATGGCTACC  
AATACTATTATTGG

>novel\_circ\_002079

ATTCGGCACATTAGGGGAACAGGAAGGCTCGAATAGTCATGCCGTGCAACAGGGGGAA  
GTATCTTCTTCGAATCCTAACATATTGTCCAACGATCAAGTTGGTCCTATTTTACTTGAG  
GCGCTAGATGGTTTTTTGTTTCGTTGTAAATACGGAAGGACGAGTGGAATATGTAACAGA  
TAACATAACGCAGTATATAAATTATACGAAGGATGATGTTCTTGGCAAGGATATTTATAAT  
ATTATTCATCATGGAGATCATAACACCTTTATGCCGAGTTTGTTCCTATGCAATTAG



>novel\_circ\_002081

GCCTAGCCCGCGTGAATTACAGGACCCGCTTTGGGTCAAAATGAGTGCGATTACTGGC  
AGCATCAGCAAAAAAAGAAAGAAATCAGATGCCAAGCCTCAGTCGCAAATTAACAAG  
TGCCTTAACGAAAAAAGACGACGGAACCAGGAGAACCTGTTTATCGATGAGCTTGCC  
GAGCTGATTTCCGCCACGGACATGAGCTCTGGCAAGACTGACAAATGCCAGATCCTTC  
AGAGAACCGTCGACCAG

>novel\_circ\_002082

ATTATTCATAAATTACGAATGCCTCACATTGGTGACGAATTACATCATTCTGGTTGGAATA  
TTTGTAGCAGTTGTCATAATAAACAACAAAAACGAGATACTCTGATACTTCCATGTCTA  
ATGTCCGATCGTGTTTACTTCATTGATACAAGTTCTGAACGAACTCCATCAATCAAAAA  
GGTATTAAGCTCGATAGAAGTAAATCAATATGGGATATCGACTTTACATACAAGTCATTG  
CTTGCCAACTGGTGAAATTTTGATTTCTGCAATGGGTAAACCAAATGGAGATGCTATAG  
GTGAATTTCTTTGCGTCAATGCAGAAACACTCGAAATGAAAGGTACCTGGACCATAGG  
AGAGAAAAAAGCAGCATTTCGGTTACGATTTTTGGTATCAACCATATCATGACGTACTCG  
TTGCATCTGAATGGGCCCTACCTAGAGTTTTCAAAAAAGGCTATGCAACAACTGATATA  
GCCGATCCTGCAATATATGGAAGAAGTTTAAATTTTTATTTCATGGAACGAAAGAAAATT  
GAAACAAGTTTTAAATTTGGGTGAAGATGGAATTGCGCCACTTGAAGTACGATTTCTTC  
ATAATCCAAAATCTAGCGAAGGATTTGTAGGATGTGCGGTTACTTCAAATGTATATAAAT  
TTTATAAAACATCAAATGGAGAATGGGCTGCAAAAAAAGTGATTCAAATTCTTAATAAA  
CAAGTGGAAGGATGGATTACTCCACAAATGCCAG
